# Supplementary material
Source: PubMed Central journal article supplement (PMC8223627)
Supplement: gutjnl-2020-323826supp002.pdf [file gutjnl-2020-323826supp002.pdf]

Table S1. Clinical data of all enrolled patients

| Sample (1, tongue coating; 2, fecal) | Cohort    | number | SEX (1, male; 2, female) | AGE | Red blood cell (10 <sup>9</sup> /L) | White blood cell (10 <sup>9</sup> /L) | Neutrophil (10 <sup>9</sup> /L) | Lymphocyte (10 <sup>9</sup> /L) | Platelet (10 <sup>9</sup> /L) | Hemoglobin (g/L) | ALT (U/L) | AST (U/L) | Total bilirubin (mmol/L) | Creatinine (μmol/L) |
|--------------------------------------|-----------|--------|--------------------------|-----|-------------------------------------|---------------------------------------|---------------------------------|---------------------------------|-------------------------------|------------------|-----------|-----------|--------------------------|---------------------|
| 1                                    | Discovery | HC001  | 1                        | 29  | 5.57                                | 6.20                                  | 3.71                            | 1.86                            | 224                           | 164.0            | 10        | 14        | 17.76                    | 92                  |
| 1                                    | Discovery | HC002  | 1                        | 30  | 5.53                                | 5.90                                  | 3.17                            | 2.18                            | 281                           | 168.0            | 7         | 13        | 10.24                    | 80                  |
| 1                                    | Discovery | HC004  | 2                        | 31  | 4.90                                | 7.80                                  | 5.45                            | 1.89                            | 338                           | 153.0            | 10        | 17        | 7.03                     | 59                  |
| 1                                    | Discovery | HC005  | 2                        | 32  | 4.45                                | 5.80                                  | 4.03                            | 1.35                            | 236                           | 141.0            | 21        | 18        | 9.67                     | 60                  |
| 1                                    | Discovery | HC006  | 1                        | 35  | 4.84                                | 6.20                                  | 3.33                            | 2.33                            | 199                           | 164.0            | 8         | 16        | 23.59                    | 67                  |
| 1                                    | Discovery | HC008  | 2                        | 37  | 4.75                                | 5.60                                  | 3.91                            | 1.43                            | 276                           | 147.0            | 8         | 16        | 18.18                    | 68                  |
| 1                                    | Discovery | HC009  | 2                        | 38  | 4.29                                | 5.10                                  | 3.04                            | 1.72                            | 235                           | 128.0            | 10        | 29        | 9.52                     | 52                  |
| 1                                    | Discovery | HC010  | 2                        | 26  | 4.83                                | 5.20                                  | 2.66                            | 1.92                            | 264                           | 142.0            | 14        | 16        | 14.76                    | 60                  |
| 1                                    | Discovery | HC011  | 1                        | 26  | 4.99                                | 6.50                                  | 3.52                            | 2.48                            | 192                           | 148.0            | 16        | 24        | 15.17                    | 99                  |
| 1                                    | Discovery | HC012  | 1                        | 26  | 4.88                                | 6.70                                  | 3.76                            | 2.26                            | 308                           | 154.0            | 127       | 77        | 15.31                    | 87                  |
| 1                                    | Discovery | HC014  | 2                        | 28  | 4.51                                | 6.80                                  | 3.52                            | 2.73                            | 356                           | 132.0            | 31        | 24        | 13.86                    | 65                  |
| 1                                    | Discovery | HC016  | 1                        | 29  | 5.45                                | 7.40                                  | 4.81                            | 1.89                            | 230                           | 166.0            | 19        | 22        | 21.03                    | 72                  |
| 1                                    | Discovery | HC018  | 2                        | 29  | 4.89                                | 3.60                                  | 1.77                            | 1.40                            | 190                           | 141.0            | 10        | 17        | 7.11                     | 55                  |
| 1                                    | Discovery | HC019  | 2                        | 30  | 4.09                                | 8.40                                  | 4.95                            | 2.77                            | 217                           | 129.0            | 144       | 79        | 10.51                    | 58                  |
| 1                                    | Discovery | HC020  | 2                        | 30  | 4.50                                | 7.90                                  | 4.91                            | 2.54                            | 265                           | 133.0            | 6         | 8         | 20.50                    | 57                  |
| 1                                    | Discovery | HC022  | 1                        | 31  | 5.14                                | 3.80                                  | 1.69                            | 1.77                            | 174                           | 158.0            | 16        | 22        | 22.95                    | 81                  |
| 1                                    | Discovery | HC023  | 2                        | 31  | 4.61                                | 7.70                                  | 4.70                            | 2.26                            | 241                           | 144.0            | 18        | 29        | 13.26                    | 63                  |
| 1                                    | Discovery | HC025  | 2                        | 31  | 4.18                                | 7.10                                  | 4.54                            | 2.09                            | 243                           | 127.0            | 11        | 15        | 3.95                     | 66                  |
| 1                                    | Discovery | HC027  | 1                        | 32  | 5.09                                | 7.10                                  | 5.23                            | 1.29                            | 172                           | 159.0            | 18        | 24        | 15.30                    | 83                  |
| 1                                    | Discovery | HC029  | 2                        | 32  | 4.24                                | 4.70                                  | 2.52                            | 1.58                            | 266                           | 120.0            | 19        | 23        | 11.28                    | 48                  |
| 1                                    | Discovery | HC030  | 1                        | 32  | 4.96                                | 5.50                                  | 2.68                            | 2.32                            | 150                           | 160.0            | 21        | 19        | 23.19                    | 92                  |
| 1                                    | Discovery | HC031  | 1                        | 32  | 4.88                                | 5.60                                  | 4.00                            | 1.23                            | 178                           | 158.0            | 13        | 23        | 13.87                    | 84                  |
| 1                                    | Discovery | HC033  | 1                        | 32  | 5.06                                | 6.20                                  | 3.42                            | 2.04                            | 256                           | 161.0            | 16        | 20        | 10.19                    | 80                  |
| 1                                    | Discovery | HC034  | 1                        | 34  | 4.86                                | 5.60                                  | 3.01                            | 2.06                            | 156                           | 150.0            | 22        | 18        | 5.81                     | 82                  |
| 1                                    | Discovery | HC035  | 2                        | 34  | 4.40                                | 7.80                                  | 4.47                            | 1.87                            | 257                           | 130.0            | 8         | 13        | 13.19                    | 69                  |
| 1                                    | Discovery | HC037  | 1                        | 34  | 4.66                                | 5.40                                  | 3.20                            | 1.73                            | 210                           | 157.0            | 15        | 19        | 38.24                    | 72                  |
| 1                                    | Discovery | HC038  | 1                        | 34  | 4.86                                | 7.10                                  | 3.82                            | 2.63                            | 200                           | 150.0            | 17        | 19        | 13.73                    | 71                  |
| 1                                    | Discovery | HC039  | 1                        | 35  | 4.73                                | 8.70                                  | 4.70                            | 3.25                            | 285                           | 149.0            | 12        | 19        | 16.21                    | 85                  |
| 1                                    | Discovery | HC040  | 2                        | 35  | 4.05                                | 5.10                                  | 3.20                            | 1.55                            | 315                           | 129.0            | 10        | 17        | 16.84                    | 45                  |
| 1                                    | Discovery | HC041  | 1                        | 35  | 4.97                                | 6.60                                  | 3.66                            | 2.40                            | 231                           | 151.0            | 22        | 21        | 15.91                    | 107                 |
| 1                                    | Discovery | HC042  | 2                        | 35  | 3.46                                | 4.12                                  | 2.03                            | 1.77                            | 149                           | 78.0             | 14        | 19        | 12.65                    | 52                  |
| 1                                    | Discovery | HC043  | 2                        | 35  | 4.13                                | 4.50                                  | 2.52                            | 1.57                            | 256                           | 91.0             | 16        | 17        | 9.75                     | 60                  |
| 1                                    | Discovery | HC044  | 1                        | 36  | 5.30                                | 7.70                                  | 4.34                            | 2.57                            | 233                           | 158.0            | 19        | 13        | 14.22                    | 103                 |
| 1                                    | Discovery | HC045  | 2                        | 36  | 4.06                                | 4.80                                  | 2.64                            | 1.75                            | 203                           | 119.0            | 12        | 15        | 11.02                    | 64                  |
| 1                                    | Discovery | HC047  | 2                        | 36  | 4.14                                | 4.70                                  | 2.29                            | 2.04                            | 222                           | 133.0            | 11        | 14        | 23.47                    | 50                  |
| 1                                    | Discovery | HC048  | 1                        | 37  | 5.11                                | 3.00                                  | 1.74                            | 0.80                            | 96                            | 159.0            | 22        | 23        | 23.15                    | 91                  |
| 1                                    | Discovery | HC049  | 1                        | 37  | 5.19                                | 11.70                                 | 7.79                            | 2.68                            | 246                           | 161.0            | 101       | 46        | 8.57                     | 83                  |
| 1                                    | Discovery | HC052  | 2                        | 38  | 4.01                                | 4.40                                  | 2.95                            | 1.17                            | 182                           | 119.0            | 5         | 11        | 9.90                     | 52                  |
| 1                                    | Discovery | HC053  | 1                        | 39  | 4.92                                | 5.00                                  | 2.23                            | 2.10                            | 280                           | 151.0            | 9         | 16        | 10.10                    | 81                  |
| 1                                    | Discovery | HC055  | 2                        | 39  | 4.48                                | 4.80                                  | 2.64                            | 1.65                            | 333                           | 137.0            | 71        | 47        | 13.65                    | 66                  |
| 1                                    | Discovery | HC058  | 1                        | 41  | 5.30                                | 4.90                                  | 2.74                            | 1.64                            | 186                           | 164.0            | 37        | 19        | 17.63                    | 90                  |
| 1                                    | Discovery | HC059  | 2                        | 41  | 4.12                                | 3.50                                  | 1.61                            | 1.63                            | 191                           | 128.0            | 12        | 19        | 11.57                    | 60                  |

|   |           |       |   |    |      |       |      |      |     |       |    |    |       |     |
|---|-----------|-------|---|----|------|-------|------|------|-----|-------|----|----|-------|-----|
| 1 | Discovery | HC060 | 1 | 41 | 5.62 | 7.50  | 3.37 | 3.10 | 318 | 164.0 | 36 | 22 | 10.66 | 67  |
| 1 | Discovery | HC063 | 2 | 42 | 3.78 | 4.70  | 2.79 | 1.55 | 272 | 122.0 | 20 | 25 | 13.1  | 66  |
| 1 | Discovery | HC066 | 1 | 44 | 4.84 | 6.30  | 2.98 | 2.38 | 201 | 154.0 | 15 | 17 | 13.70 | 79  |
| 1 | Discovery | HC067 | 1 | 45 | 5.46 | 6.10  | 3.93 | 1.51 | 315 | 158.0 | 9  | 19 | 9.45  | 64  |
| 1 | Discovery | HC069 | 1 | 46 | 5.34 | 5.60  | 3.14 | 1.98 | 214 | 162.0 | 15 | 18 | 11.18 | 106 |
| 1 | Discovery | HC071 | 2 | 46 | 4.22 | 7.91  | 5.63 | 1.75 | 230 | 141.0 | 17 | 19 | 12.21 | 61  |
| 1 | Discovery | HC074 | 1 | 47 | 5.11 | 7.80  | 5.00 | 2.07 | 232 | 165.0 | 13 | 14 | 10.43 | 76  |
| 1 | Discovery | HC075 | 1 | 47 | 4.80 | 5.60  | 2.57 | 2.66 | 196 | 151.0 | 48 | 32 | 18.73 | 87  |
| 1 | Discovery | HC141 | 1 | 47 | 4.66 | 7.90  | 4.73 | 2.24 | 301 | 154.0 | 46 | 21 | 11.00 | 81  |
| 1 | Discovery | HC142 | 1 | 47 | 4.46 | 4.60  | 2.66 | 1.52 | 223 | 139.0 | 28 | 23 | 7.30  | 76  |
| 1 | Discovery | HC143 | 1 | 47 | 5.06 | 6.30  | 3.40 | 1.85 | 210 | 158.0 | 16 | 20 | 9.61  | 65  |
| 1 | Discovery | HC144 | 1 | 48 | 4.28 | 7.21  | 4.49 | 1.77 | 203 | 137   | 25 | 22 | 13.27 | 73  |
| 1 | Discovery | HC145 | 1 | 48 | 4.73 | 6.60  | 3.46 | 2.05 | 247 | 150.0 | 17 | 15 | 14.21 | 80  |
| 1 | Discovery | HC146 | 2 | 48 | 4.75 | 6.10  | 3.18 | 2.35 | 350 | 111.0 | 27 | 34 | 4.41  | 55  |
| 1 | Discovery | HC147 | 1 | 48 | 4.31 | 10.69 | 7.29 | 2.60 | 215 | 144.0 | 39 | 23 | 12.54 | 71  |
| 1 | Discovery | HC148 | 1 | 48 | 4.94 | 6.10  | 4.08 | 1.58 | 204 | 156.0 | 36 | 38 | 13.74 | 74  |
| 1 | Discovery | HC080 | 2 | 49 | 3.95 | 6.20  | 3.55 | 2.01 | 250 | 121.0 | 31 | 26 | 3.85  | 52  |
| 1 | Discovery | HC081 | 2 | 50 | 4.19 | 4.40  | 2.76 | 1.33 | 187 | 135.0 | 9  | 17 | 9.97  | 64  |
| 1 | Discovery | HC082 | 2 | 50 | 4.63 | 4.50  | 2.22 | 1.96 | 175 | 144.0 | 19 | 38 | 11.56 | 66  |
| 1 | Discovery | HC131 | 1 | 50 | 5.01 | 8.10  | 4.70 | 2.72 | 244 | 159.0 | 25 | 17 | 6.39  | 58  |
| 1 | Discovery | HC150 | 2 | 50 | 4.74 | 6.20  | 3.85 | 2.00 | 208 | 141.0 | 14 | 18 | 5.31  | 44  |
| 1 | Discovery | HC083 | 2 | 51 | 4.13 | 4.70  | 2.21 | 1.96 | 237 | 135.0 | 11 | 16 | 10.74 | 60  |
| 1 | Discovery | HC084 | 1 | 51 | 4.68 | 3.63  | 1.93 | 1.21 | 202 | 144.0 | 21 | 20 | 12.67 | 62  |
| 1 | Discovery | HC085 | 1 | 51 | 4.96 | 4.00  | 2.44 | 1.11 | 232 | 149.0 | 24 | 21 | 12.41 | 69  |
| 1 | Discovery | HC086 | 1 | 51 | 4.97 | 6.50  | 4.24 | 1.58 | 219 | 147.0 | 30 | 23 | 7.66  | 84  |
| 1 | Discovery | HC087 | 1 | 51 | 5.04 | 5.20  | 3.05 | 1.40 | 249 | 161.0 | 33 | 28 | 14.78 | 88  |
| 1 | Discovery | HC133 | 1 | 51 | 4.61 | 4.80  | 2.50 | 1.87 | 261 | 150.0 | 18 | 26 | 12.24 | 86  |
| 1 | Discovery | HC089 | 2 | 52 | 4.66 | 5.90  | 3.10 | 2.28 | 239 | 148.0 | 35 | 22 | 7.83  | 60  |
| 1 | Discovery | HC090 | 1 | 52 | 4.66 | 4.70  | 2.25 | 1.80 | 177 | 142.0 | 52 | 37 | 15.33 | 85  |
| 1 | Discovery | HC135 | 1 | 52 | 5.20 | 5.30  | 2.61 | 2.15 | 211 | 156.0 | 13 | 20 | 8.54  | 72  |
| 1 | Discovery | HC091 | 2 | 53 | 4.38 | 5.00  | 2.61 | 1.98 | 287 | 134.0 | 10 | 14 | 8.86  | 59  |
| 1 | Discovery | HC092 | 1 | 53 | 5.14 | 6.00  | 3.70 | 1.63 | 240 | 156.0 | 13 | 17 | 5.35  | 63  |
| 1 | Discovery | HC130 | 1 | 53 | 5.12 | 7.23  | 4.21 | 3.21 | 216 | 125   | 21 | 18 | 5.25  | 78  |
| 1 | Discovery | HC136 | 1 | 53 | 5.02 | 6.90  | 4.65 | 1.67 | 248 | 157.0 | 18 | 43 | 13.58 | 112 |
| 1 | Discovery | HC137 | 1 | 53 | 4.15 | 4.90  | 2.79 | 1.64 | 192 | 139.0 | 11 | 17 | 12.38 | 72  |
| 1 | Discovery | HC138 | 1 | 53 | 4.42 | 9.50  | 6.92 | 2.04 | 331 | 131.0 | 11 | 11 | 8.65  | 75  |
| 1 | Discovery | HC093 | 1 | 54 | 5.39 | 6.10  | 3.25 | 1.95 | 252 | 176.0 | 21 | 22 | 29.05 | 78  |
| 1 | Discovery | HC095 | 1 | 55 | 5.03 | 7.90  | 4.05 | 2.14 | 326 | 157.0 | 11 | 14 | 22.59 | 89  |
| 1 | Discovery | HC115 | 1 | 55 | 4.27 | 3.90  | 2.09 | 1.41 | 249 | 144.0 | 17 | 21 | 15.57 | 75  |
| 1 | Discovery | HC116 | 2 | 55 | 4.10 | 5.00  | 3.30 | 1.38 | 172 | 124.0 | 51 | 32 | 7.92  | 62  |
| 1 | Discovery | HC139 | 1 | 55 | 5.21 | 7.80  | 4.86 | 2.10 | 248 | 161.0 | 25 | 29 | 5.46  | 83  |
| 1 | Discovery | HC097 | 1 | 56 | 4.91 | 7.60  | 5.16 | 1.85 | 309 | 152.0 | 19 | 18 | 14.55 | 89  |
| 1 | Discovery | HC098 | 1 | 56 | 4.15 | 4.00  | 2.30 | 1.28 | 256 | 124.0 | 9  | 15 | 13.12 | 47  |
| 1 | Discovery | HC118 | 1 | 56 | 4.71 | 8.20  | 5.10 | 2.50 | 188 | 154.0 | 24 | 57 | 15.23 | 83  |
| 1 | Discovery | HC119 | 2 | 56 | 4.53 | 6.80  | 3.85 | 2.31 | 206 | 144.0 | 11 | 15 | 8.47  | 62  |
| 1 | Discovery | HC099 | 1 | 57 | 4.98 | 7.50  | 5.14 | 1.49 | 119 | 147.0 | 13 | 20 | 8.15  | 92  |
| 1 | Discovery | HC101 | 1 | 59 | 4.68 | 5.60  | 3.40 | 1.61 | 177 | 150.0 | 17 | 17 | 15.27 | 71  |

|   |            |       |   |    |      |      |       |      |      |       |       |     |       |     |
|---|------------|-------|---|----|------|------|-------|------|------|-------|-------|-----|-------|-----|
| 1 | Discovery  | HC121 | 1 | 59 | 4.25 | 6.00 | 3.50  | 1.91 | 271  | 138.0 | 30    | 26  | 6.26  | 80  |
| 1 | Discovery  | HC123 | 1 | 60 | 4.47 | 6.30 | 4.22  | 1.63 | 235  | 129.0 | 10    | 20  | 11.18 | 78  |
| 1 | Discovery  | HC104 | 1 | 61 | 4.42 | 6.10 | 3.96  | 1.63 | 262  | 141.0 | 17    | 19  | 7.24  | 51  |
| 1 | Discovery  | HC106 | 2 | 62 | 4.19 | 4.80 | 2.82  | 1.64 | 224  | 128.0 | 14    | 13  | 7.19  | 47  |
| 1 | Discovery  | HC107 | 1 | 64 | 4.87 | 5.60 | 3.38  | 1.60 | 254  | 144.0 | 31    | 25  | 12.49 | 67  |
| 1 | Discovery  | HC108 | 1 | 65 | 4.78 | 6.10 | 3.21  | 2.39 | 193  | 153.0 | 9     | 19  | 10.26 | 79  |
| 1 | Discovery  | HC109 | 1 | 66 | 4.58 | 4.60 | 2.59  | 1.68 | 215  | 136.0 | 25    | 26  | 9.88  | 65  |
| 1 | Discovery  | HC125 | 1 | 66 | 5.13 | 5.90 | 3.06  | 2.32 | 242  | 156.0 | 19    | 22  | 22.47 | 55  |
| 1 | Discovery  | HC126 | 2 | 66 | 4.96 | 8.10 | 4.73  | 2.32 | 236  | 83.0  | 18    | 26  | 9.88  | 53  |
| 1 | Discovery  | HC110 | 2 | 68 | 3.90 | 5.20 | 2.45  | 2.26 | 227  | 118.0 | 9     | 17  | 9.24  | 52  |
| 1 | Discovery  | HC112 | 2 | 69 | 4.21 | 6.60 | 3.50  | 2.44 | 307  | 133.0 | 20    | 23  | 16.15 | 56  |
| 1 | Validation | HC003 | 1 | 20 | 5.16 | 5.60 | 161.0 | 1.72 | 3.07 | 253   | 11.53 | 35  | 24    | 83  |
| 1 | Validation | HC007 | 1 | 25 | 5.38 | 8.00 | 159.0 | 2.86 | 4.41 | 370   | 7.99  | 15  | 15    | 73  |
| 1 | Validation | HC013 | 2 | 27 | 4.57 | 5.30 | 134.0 | 1.95 | 2.79 | 255   | 8.72  | 4   | 14    | 70  |
| 1 | Validation | HC015 | 1 | 28 | 5.49 | 7.00 | 166.0 | 2.72 | 3.80 | 224   | 13.48 | 48  | 34    | 85  |
| 1 | Validation | HC017 | 2 | 29 | 4.36 | 5.40 | 128.0 | 1.37 | 3.39 | 199   | 12.35 | 8   | 18    | 58  |
| 1 | Validation | HC021 | 1 | 30 | 4.95 | 6.00 | 154.0 | 1.49 | 3.96 | 257   | 10.50 | 167 | 53    | 82  |
| 1 | Validation | HC024 | 1 | 31 | 4.74 | 5.80 | 151.0 | 1.88 | 3.19 | 275   | 12.72 | 43  | 22    | 82  |
| 1 | Validation | HC026 | 1 | 32 | 5.09 | 8.20 | 151.0 | 3.30 | 4.18 | 305   | 13.81 | 17  | 20    | 96  |
| 1 | Validation | HC028 | 2 | 32 | 4.64 | 5.20 | 135.0 | 1.66 | 3.02 | 269   | 14.33 | 16  | 21    | 66  |
| 1 | Validation | HC032 | 1 | 32 | 5.38 | 7.10 | 159.0 | 2.34 | 4.04 | 265   | 13.04 | 32  | 41    | 76  |
| 1 | Validation | HC036 | 1 | 34 | 4.87 | 7.10 | 148.0 | 1.93 | 4.55 | 246   | 5.98  | 62  | 25    | 117 |
| 1 | Validation | HC046 | 2 | 36 | 3.71 | 5.20 | 127.0 | 2.14 | 2.68 | 199   | 14.52 | 12  | 19    | 67  |
| 1 | Validation | HC050 | 1 | 37 | 4.88 | 6.40 | 152.0 | 1.98 | 3.93 | 223   | 31.22 | 18  | 18    | 88  |
| 1 | Validation | HC051 | 1 | 38 | 4.95 | 4.30 | 156.0 | 1.59 | 2.33 | 189   | 9.29  | 13  | 22    | 85  |
| 1 | Validation | HC054 | 2 | 39 | 4.71 | 6.50 | 141.0 | 1.61 | 4.08 | 229   | 9.52  | 9   | 14    | 72  |
| 1 | Validation | HC056 | 1 | 39 | 5.63 | 9.60 | 164.0 | 2.11 | 6.57 | 267   | 15.50 | 27  | 27    | 95  |
| 1 | Validation | HC057 | 2 | 40 | 4.82 | 8.50 | 144.0 | 2.35 | 5.28 | 342   | 9.40  | 14  | 22    | 66  |
| 1 | Validation | HC061 | 1 | 41 | 4.53 | 5.70 | 154.0 | 2.16 | 3.13 | 189   | 13.10 | 80  | 37    | 78  |
| 1 | Validation | HC062 | 1 | 42 | 5.03 | 4.00 | 154.0 | 1.53 | 2.13 | 214   | 25.66 | 23  | 21    | 99  |
| 1 | Validation | HC064 | 1 | 43 | 4.83 | 6.90 | 155.0 | 3.50 | 2.69 | 190   | 9.00  | 14  | 12    | 89  |
| 1 | Validation | HC065 | 1 | 43 | 4.42 | 4.50 | 140.0 | 1.76 | 2.29 | 200   | 14.25 | 9   | 18    | 68  |
| 1 | Validation | HC068 | 2 | 45 | 4.36 | 4.20 | 130.0 | 1.43 | 2.41 | 190   | 8.29  | 8   | 13    | 79  |
| 1 | Validation | HC070 | 2 | 25 | 4.74 | 8.40 | 140.0 | 2.40 | 5.28 | 235   | 9.97  | 15  | 18    | 57  |
| 1 | Validation | HC072 | 1 | 46 | 4.86 | 6.00 | 154.0 | 1.90 | 3.56 | 216   | 16.51 | 12  | 16    | 88  |
| 1 | Validation | HC073 | 1 | 47 | 4.94 | 5.80 | 153.0 | 1.15 | 4.28 | 215   | 9.20  | 34  | 23    | 81  |
| 1 | Validation | HC076 | 1 | 26 | 5.07 | 6.40 | 154.0 | 2.75 | 2.93 | 190   | 18.11 | 73  | 60    | 82  |
| 1 | Validation | HC077 | 2 | 24 | 3.95 | 2.77 | 109.0 | 0.91 | 1.36 | 213   | 4.49  | 17  | 23    | 54  |
| 1 | Validation | HC078 | 1 | 48 | 4.85 | 6.80 | 157.0 | 1.73 | 4.32 | 249   | 15.44 | 22  | 32    | 89  |
| 1 | Validation | HC079 | 2 | 48 | 4.20 | 6.30 | 136.0 | 1.49 | 4.30 | 205   | 22.16 | 10  | 14    | 59  |
| 1 | Validation | HC149 | 1 | 49 | 4.39 | 6.40 | 140.0 | 2.21 | 3.49 | 266   | 9.43  | 21  | 21    | 59  |
| 1 | Validation | HC132 | 1 | 50 | 5.55 | 4.70 | 166.0 | 1.67 | 2.71 | 211   | 19.12 | 24  | 20    | 83  |
| 1 | Validation | HC088 | 1 | 51 | 4.13 | 4.90 | 106.0 | 1.58 | 2.91 | 249   | 4.70  | 19  | 28    | 68  |
| 1 | Validation | HC134 | 1 | 51 | 5.12 | 7.20 | 163.0 | 2.10 | 4.10 | 140   | 15.36 | 29  | 24    | 72  |
| 1 | Validation | HC094 | 2 | 54 | 4.32 | 4.70 | 136.0 | 1.18 | 3.16 | 174   | 11.97 | 31  | 26    | 69  |
| 1 | Validation | HC096 | 2 | 55 | 4.78 | 6.10 | 145.0 | 1.56 | 4.07 | 315   | 8.39  | 52  | 33    | 54  |
| 1 | Validation | HC113 | 1 | 20 | 4.61 | 6.20 | 154.0 | 1.95 | 3.11 | 216   | 16.24 | 11  | 15    | 81  |

|   |            |       |   |    |      |       |       |      |      |     |       |    |      |       |
|---|------------|-------|---|----|------|-------|-------|------|------|-----|-------|----|------|-------|
| 1 | Validation | HC114 | 1 | 55 | 5.08 | 7.40  | 157.0 | 1.81 | 4.51 | 125 | 22.35 | 27 | 19   | 109   |
| 1 | Validation | HC117 | 1 | 55 | 4.97 | 4.90  | 147.0 | 1.48 | 2.71 | 152 | 11.74 | 12 | 18   | 84    |
| 1 | Validation | HC120 | 2 | 56 | 4.88 | 7.10  | 141.0 | 3.53 | 2.64 | 247 | 8.61  | 16 | 24   | 60    |
| 1 | Validation | HC129 | 2 | 56 | 4.42 | 6.10  | 142.0 | 2.23 | 3.39 | 294 | 11.43 | 68 | 39   | 59    |
| 1 | Validation | HC140 | 1 | 23 | 4.47 | 5.80  | 149.0 | 1.50 | 3.82 | 201 | 8.32  | 25 | 25   | 79    |
| 1 | Validation | HC100 | 1 | 58 | 4.36 | 4.30  | 149.0 | 1.61 | 2.42 | 179 | 10.45 | 26 | 31   | 82    |
| 1 | Validation | HC102 | 1 | 59 | 5.04 | 6.40  | 160.0 | 2.28 | 3.55 | 291 | 8.21  | 18 | 12   | 85    |
| 1 | Validation | HC103 | 1 | 60 | 5.25 | 4.40  | 170.0 | 1.64 | 2.29 | 152 | 23.37 | 84 | 58   | 77    |
| 1 | Validation | HC122 | 2 | 50 | 4.12 | 5.30  | 124.0 | 2.10 | 2.69 | 165 | 13.7  | 18 | 16   | 47    |
| 1 | Validation | HC105 | 1 | 61 | 5.41 | 9.90  | 158.0 | 2.25 | 5.59 | 177 | 13.85 | 13 | 20   | 86    |
| 1 | Validation | HC124 | 2 | 53 | 4.10 | 3.90  | 128.0 | 1.14 | 2.48 | 237 | 6.52  | 21 | 22   | 64    |
| 1 | Validation | HC127 | 1 | 68 | 4.99 | 4.80  | 152.0 | 1.77 | 2.53 | 204 | 12.66 | 14 | 17   | 86    |
| 1 | Validation | HC111 | 2 | 69 | 4.28 | 6.10  | 126.0 | 2.41 | 3.05 | 247 | 2.23  | 10 | 18   | 57    |
| 1 | Validation | HC128 | 2 | 55 | 4.53 | 8.20  | 137.0 | 3.12 | 4.34 | 292 | 10.69 | 14 | 23   | 58    |
| 2 | Discovery  | HC72  | 2 | 36 | 2.64 | 4.80  | 119.0 | 1.75 | 15   | 12  | 203   | 64 | 4.06 | 11.02 |
| 2 | Discovery  | HC71  | 2 | 36 | 2.68 | 5.20  | 127.0 | 2.14 | 19   | 12  | 199   | 67 | 3.71 | 14.52 |
| 2 | Discovery  | HC69  | 2 | 38 | 2.95 | 4.40  | 119.0 | 1.17 | 11   | 5   | 182   | 52 | 4.01 | 9.90  |
| 2 | Discovery  | HC70  | 2 | 39 | 4.08 | 6.50  | 141.0 | 1.61 | 14   | 9   | 229   | 72 | 4.71 | 9.52  |
| 2 | Discovery  | HC67  | 2 | 39 | 2.64 | 4.80  | 137.0 | 1.65 | 47   | 71  | 333   | 66 | 4.48 | 13.65 |
| 2 | Discovery  | HC68  | 2 | 40 | 5.28 | 8.50  | 144.0 | 2.35 | 22   | 14  | 342   | 66 | 4.82 | 9.40  |
| 2 | Discovery  | HC65  | 2 | 41 | 1.61 | 3.50  | 128.0 | 1.63 | 19   | 12  | 191   | 60 | 4.12 | 11.57 |
| 2 | Discovery  | HC66  | 1 | 41 | 3.13 | 5.70  | 154.0 | 2.16 | 37   | 80  | 189   | 78 | 4.53 | 13.10 |
| 2 | Discovery  | HC61  | 2 | 42 | 2.79 | 4.70  | 122.0 | 1.55 | 33   | 24  | 272   | 88 | 3.78 | 13.10 |
| 2 | Discovery  | HC62  | 1 | 43 | 2.69 | 6.90  | 155.0 | 3.50 | 12   | 14  | 190   | 89 | 4.83 | 9.00  |
| 2 | Discovery  | HC63  | 1 | 43 | 2.29 | 4.50  | 140.0 | 1.76 | 18   | 9   | 200   | 68 | 4.42 | 14.25 |
| 2 | Discovery  | HC64  | 1 | 44 | 2.98 | 6.30  | 154.0 | 2.38 | 17   | 24  | 201   | 79 | 4.84 | 13.70 |
| 2 | Discovery  | HC54  | 1 | 45 | 3.93 | 6.10  | 158.0 | 1.51 | 19   | 9   | 315   | 64 | 5.46 | 9.45  |
| 2 | Discovery  | HC55  | 2 | 45 | 2.41 | 4.20  | 130.0 | 1.43 | 13   | 8   | 190   | 79 | 4.36 | 8.29  |
| 2 | Discovery  | HC58  | 2 | 46 | 5.63 | 7.91  | 141.0 | 1.75 | 19   | 17  | 230   | 61 | 4.22 | 12.21 |
| 2 | Discovery  | HC59  | 1 | 46 | 3.56 | 6.00  | 154.0 | 1.90 | 16   | 12  | 216   | 88 | 4.86 | 16.51 |
| 2 | Discovery  | HC60  | 1 | 47 | 2.57 | 5.60  | 151.0 | 2.66 | 32   | 48  | 196   | 87 | 4.80 | 18.73 |
| 2 | Discovery  | HC46  | 1 | 47 | 3.40 | 6.30  | 158.0 | 1.85 | 20   | 16  | 210   | 65 | 5.06 | 9.61  |
| 2 | Discovery  | HC49  | 2 | 48 | 4.30 | 6.30  | 136.0 | 1.49 | 14   | 10  | 205   | 59 | 4.20 | 22.16 |
| 2 | Discovery  | HC50  | 1 | 48 | 3.46 | 6.60  | 150.0 | 2.05 | 15   | 17  | 247   | 80 | 4.73 | 14.21 |
| 2 | Discovery  | HC51  | 2 | 48 | 3.18 | 6.10  | 111.0 | 2.35 | 27   | 31  | 350   | 55 | 4.75 | 4.41  |
| 2 | Discovery  | HC43  | 1 | 48 | 7.29 | 10.69 | 144.0 | 2.60 | 23   | 39  | 215   | 71 | 4.31 | 12.54 |
| 2 | Discovery  | HC44  | 1 | 48 | 4.08 | 6.10  | 156.0 | 1.58 | 38   | 36  | 204   | 74 | 4.94 | 13.74 |
| 2 | Discovery  | HC45  | 2 | 49 | 3.55 | 6.20  | 121.0 | 2.01 | 26   | 31  | 250   | 52 | 3.95 | 3.85  |
| 2 | Discovery  | HC37  | 1 | 49 | 3.49 | 6.40  | 140.0 | 2.21 | 21   | 21  | 266   | 59 | 4.39 | 9.43  |
| 2 | Discovery  | HC38  | 2 | 50 | 2.76 | 4.40  | 135.0 | 1.33 | 17   | 9   | 187   | 64 | 4.19 | 9.97  |
| 2 | Discovery  | HC39  | 2 | 50 | 2.22 | 4.50  | 144.0 | 1.96 | 28   | 19  | 175   | 66 | 4.63 | 11.56 |
| 2 | Discovery  | HC40  | 1 | 50 | 4.70 | 8.10  | 159.0 | 2.72 | 17   | 25  | 244   | 58 | 5.01 | 6.39  |
| 2 | Discovery  | HC41  | 1 | 50 | 2.71 | 4.70  | 166.0 | 1.67 | 20   | 24  | 211   | 83 | 5.55 | 19.12 |
| 2 | Discovery  | HC42  | 2 | 50 | 3.85 | 6.20  | 141.0 | 2.00 | 18   | 14  | 208   | 44 | 4.74 | 5.31  |
| 2 | Discovery  | HC33  | 2 | 51 | 2.21 | 4.70  | 135.0 | 1.96 | 16   | 11  | 237   | 60 | 4.13 | 10.74 |
| 2 | Discovery  | HC34  | 1 | 51 | 1.93 | 3.63  | 144.0 | 1.21 | 20   | 21  | 202   | 62 | 4.68 | 12.67 |
| 2 | Discovery  | HC35  | 1 | 51 | 2.44 | 4.00  | 149.0 | 1.11 | 21   | 24  | 232   | 69 | 4.96 | 12.41 |

|   |            |       |   |    |      |      |       |       |     |      |     |    |      |       |
|---|------------|-------|---|----|------|------|-------|-------|-----|------|-----|----|------|-------|
| 2 | Discovery  | HC27  | 1 | 51 | 4.10 | 7.20 | 163.0 | 2.10  | 24  | 29   | 140 | 72 | 5.12 | 15.36 |
| 2 | Discovery  | HC28  | 2 | 52 | 3.10 | 5.90 | 148.0 | 2.28  | 22  | 35   | 239 | 60 | 4.66 | 7.83  |
| 2 | Discovery  | HC29  | 1 | 52 | 2.25 | 4.70 | 142.0 | 1.80  | 37  | 52   | 177 | 85 | 4.66 | 15.33 |
| 2 | Discovery  | HC23  | 1 | 52 | 2.61 | 5.30 | 156.0 | 2.15  | 20  | 13   | 211 | 72 | 5.20 | 8.54  |
| 2 | Discovery  | HC24  | 2 | 53 | 2.61 | 5.00 | 134.0 | 1.98  | 14  | 10   | 287 | 59 | 4.38 | 8.86  |
| 2 | Discovery  | HC25  | 1 | 53 | 3.70 | 6.00 | 156.0 | 1.63  | 17  | 13   | 240 | 63 | 5.14 | 5.35  |
| 2 | Discovery  | HC18  | 1 | 54 | 3.25 | 6.10 | 176.0 | 1.95  | 22  | 21   | 252 | 78 | 5.39 | 29.05 |
| 2 | Discovery  | HC19  | 2 | 54 | 3.16 | 4.70 | 136.0 | 1.18  | 26  | 31   | 174 | 69 | 4.32 | 11.97 |
| 2 | Discovery  | HC20  | 1 | 55 | 4.05 | 7.90 | 157.0 | 2.14  | 14  | 11   | 326 | 89 | 5.03 | 22.59 |
| 2 | Discovery  | HC21  | 2 | 55 | 4.07 | 6.10 | 145.0 | 1.56  | 33  | 52   | 315 | 54 | 4.78 | 8.39  |
| 2 | Discovery  | HC16  | 2 | 55 | 3.30 | 5.00 | 124.0 | 1.38  | 32  | 51   | 172 | 62 | 4.10 | 7.92  |
| 2 | Discovery  | HC15  | 2 | 56 | 2.64 | 7.10 | 141.0 | 3.53  | 24  | 16   | 247 | 60 | 4.88 | 8.61  |
| 2 | Discovery  | HC12  | 1 | 57 | 5.14 | 7.50 | 147.0 | 1.49  | 20  | 13   | 119 | 92 | 4.98 | 8.15  |
| 2 | Discovery  | HC07  | 2 | 62 | 2.82 | 4.80 | 128.0 | 1.64  | 13  | 14   | 224 | 47 | 4.19 | 7.19  |
| 2 | Discovery  | HC03  | 2 | 69 | 3.05 | 6.10 | 126.0 | 2.41  | 18  | 10   | 247 | 57 | 4.28 | 2.23  |
| 2 | Validation | HC069 | 1 | 46 | 3.14 | 1.98 | 5.60  | 162.0 | 214 | 5.34 | 15  | 18 | 106  | 11.18 |
| 2 | Validation | HC070 | 2 | 25 | 5.28 | 2.40 | 8.40  | 140.0 | 235 | 4.74 | 15  | 18 | 57   | 9.97  |
| 2 | Validation | HC141 | 1 | 47 | 4.73 | 2.24 | 7.90  | 154.0 | 301 | 4.66 | 46  | 21 | 81   | 11.00 |
| 2 | Validation | HC142 | 1 | 47 | 2.66 | 1.52 | 4.60  | 139.0 | 223 | 4.46 | 28  | 23 | 76   | 7.30  |
| 2 | Validation | HC076 | 1 | 26 | 2.93 | 2.75 | 6.40  | 154.0 | 190 | 5.07 | 73  | 60 | 82   | 18.11 |
| 2 | Validation | HC077 | 2 | 24 | 1.36 | 0.91 | 2.77  | 109.0 | 213 | 3.95 | 17  | 23 | 54   | 4.49  |
| 2 | Validation | HC086 | 1 | 51 | 4.24 | 1.58 | 6.50  | 147.0 | 219 | 4.97 | 30  | 23 | 84   | 7.66  |
| 2 | Validation | HC087 | 1 | 51 | 3.05 | 1.40 | 5.20  | 161.0 | 249 | 5.04 | 33  | 28 | 88   | 14.78 |
| 2 | Validation | HC088 | 1 | 51 | 2.91 | 1.58 | 4.90  | 106.0 | 249 | 4.13 | 19  | 28 | 68   | 4.70  |
| 2 | Validation | HC133 | 1 | 51 | 2.50 | 1.87 | 4.80  | 150.0 | 261 | 4.61 | 18  | 26 | 86   | 12.24 |
| 2 | Validation | HC138 | 1 | 53 | 6.92 | 2.04 | 9.50  | 131.0 | 331 | 4.42 | 11  | 11 | 75   | 8.65  |
| 2 | Validation | HC113 | 1 | 20 | 3.11 | 1.95 | 6.20  | 154.0 | 216 | 4.61 | 11  | 15 | 81   | 16.24 |
| 2 | Validation | HC098 | 1 | 56 | 2.30 | 1.28 | 4.00  | 124.0 | 256 | 4.15 | 9   | 15 | 47   | 13.12 |
| 2 | Validation | HC119 | 2 | 56 | 3.85 | 2.31 | 6.80  | 144.0 | 206 | 4.53 | 11  | 15 | 62   | 8.47  |
| 2 | Validation | HC140 | 1 | 23 | 3.82 | 1.50 | 5.80  | 149.0 | 201 | 4.47 | 25  | 25 | 79   | 8.32  |
| 2 | Validation | HC102 | 1 | 59 | 3.55 | 2.28 | 6.40  | 160.0 | 291 | 5.04 | 18  | 12 | 85   | 8.21  |
| 2 | Validation | HC122 | 2 | 50 | 2.69 | 2.10 | 5.30  | 124.0 | 165 | 4.12 | 18  | 16 | 47   | 13.74 |
| 2 | Validation | HC123 | 1 | 60 | 4.22 | 1.63 | 6.30  | 129.0 | 235 | 4.47 | 10  | 20 | 78   | 11.18 |
| 2 | Validation | HC104 | 1 | 61 | 3.96 | 1.63 | 6.10  | 141.0 | 262 | 4.42 | 17  | 19 | 51   | 7.24  |
| 2 | Validation | HC124 | 2 | 53 | 2.48 | 1.14 | 3.90  | 128.0 | 237 | 4.10 | 21  | 22 | 64   | 6.52  |
| 2 | Validation | HC109 | 1 | 66 | 2.59 | 1.68 | 4.60  | 136.0 | 215 | 4.58 | 25  | 26 | 65   | 9.88  |
| 2 | Validation | HC126 | 2 | 66 | 4.73 | 2.32 | 8.10  | 83.0  | 236 | 4.96 | 18  | 26 | 53   | 9.88  |
| 2 | Validation | HC112 | 2 | 69 | 3.50 | 2.44 | 6.60  | 133.0 | 307 | 4.21 | 20  | 23 | 56   | 16.15 |
| 2 | Validation | HC128 | 2 | 55 | 4.34 | 3.12 | 8.20  | 137.0 | 292 | 4.53 | 14  | 23 | 58   | 10.69 |

| Sample(1,tongue coating; 2, fecal) | Cohort    | number | sex(1,male; 2,female) | age(year) | height(cm) | weight(kg) | Confirmed patient or Wuhan exposure | diabetes | high blood pressure | cardiovascular diseases | COPD | malignant tumour | chronic liver diseases | The highest temperature (°) | cough | muscle pain | fatigue | cough phlegm | headache | diarrhea | dyspnea |
|------------------------------------|-----------|--------|-----------------------|-----------|------------|------------|-------------------------------------|----------|---------------------|-------------------------|------|------------------|------------------------|-----------------------------|-------|-------------|---------|--------------|----------|----------|---------|
| 1                                  | Discovery | CP-301 | 2                     | 50        | 168        | 64         | y                                   | N        | N                   | N                       | N    | N                | N                      | 37.5                        | N     | N           | N       | N            | N        | N        | N       |
| 1                                  | Discovery | CP-302 | 2                     | 45        | 160        | 73         | y                                   | N        | N                   | N                       | N    | N                | N                      | 38.2                        | N     | N           | N       | N            | N        | N        | N       |
| 1                                  | Discovery | CP-304 | 1                     | 40        | 168        | 89         | n                                   | N        | N                   | N                       | N    | N                | N                      | 39.2                        | Y     | N           | Y       | Y            | N        | N        | Y       |
| 1                                  | Discovery | CP-305 | 1                     | 39        | 165        | 75         | y                                   | N        | N                   | N                       | N    | N                | N                      | 38.8                        | N     | N           | N       | N            | N        | N        | N       |
| 1                                  | Discovery | CP-306 | 1                     | 46        | 176        | 70         | y                                   | N        | N                   | N                       | N    | N                | Y                      | 39.3                        | N     | N           | N       | N            | N        | N        | N       |
| 1                                  | Discovery | CP-307 | 2                     | 56        | 160        | 60         | y                                   | Y        | N                   | N                       | N    | N                | N                      | 38.1                        | N     | N           | N       | N            | N        | N        | N       |
| 1                                  | Discovery | CP-308 | 1                     | 47        | 176        | 72         | y                                   | N        | N                   | N                       | N    | N                | N                      | 37.9                        | N     | N           | N       | N            | N        | N        | N       |
| 1                                  | Discovery | CP-310 | 1                     | 50        | 173        | 80         | y                                   | N        | N                   | N                       | N    | N                | N                      | 37.7                        | N     | N           | N       | N            | N        | N        | N       |
| 1                                  | Discovery | CP-311 | 2                     | 51        | 160        | 60         | y                                   | N        | N                   | N                       | N    | N                | N                      | 38.1                        | Y     | N           | Y       | N            | Y        | N        | N       |
| 1                                  | Discovery | CP-312 | 2                     | 55        | 169        | 65         | y                                   | Y        | N                   | N                       | N    | N                | N                      | 39.5                        | N     | N           | N       | N            | N        | N        | N       |
| 1                                  | Discovery | CP-313 | 1                     | 40        | 170        | 61         | y                                   | N        | N                   | N                       | N    | N                | N                      | 38.8                        | N     | N           | N       | N            | N        | N        | N       |
| 1                                  | Discovery | CP-314 | 2                     | 41        | 158        | 58         | y                                   | N        | N                   | N                       | N    | N                | N                      | 37.5                        | N     | N           | N       | N            | N        | N        | N       |
| 1                                  | Discovery | CP-315 | 2                     | 44        | 162        | 62         | y                                   | N        | N                   | N                       | N    | N                | N                      | 37.6                        | N     | N           | N       | N            | N        | N        | N       |
| 1                                  | Discovery | CP-316 | 2                     | 49        | 159        | 56         | y                                   | N        | N                   | N                       | N    | N                | N                      | 38.1                        | N     | N           | N       | N            | N        | N        | N       |
| 1                                  | Discovery | CP-317 | 1                     | 51        | 172        | 85         | y                                   | N        | N                   | N                       | N    | N                | N                      | 38.5                        | N     | N           | N       | N            | N        | N        | N       |
| 1                                  | Discovery | CP-320 | 2                     | 65        | 155        | 68         | N                                   | N        | Y                   | N                       | N    | N                | N                      | 38.1                        | N     | N           | N       | Y            | N        | N        | N       |
| 1                                  | Discovery | CP-321 | 1                     | 39        | 178        | 78         | Y                                   | N        | N                   | N                       | N    | N                | Y                      | 36.8                        | N     | N           | N       | N            | N        | N        | N       |
| 1                                  | Discovery | CP-323 | 1                     | 38        | 155        | 50         | y                                   | N        | N                   | N                       | N    | N                | N                      | 38.7                        | N     | N           | N       | N            | N        | N        | N       |
| 1                                  | Discovery | CP-324 | 2                     | 50        | 159        | 59         | n                                   | Y        | N                   | N                       | N    | N                | N                      | 38.2                        | N     | N           | N       | N            | N        | N        | N       |
| 1                                  | Discovery | CP-326 | 1                     | 56        | 170        | 60         | y                                   | N        | N                   | N                       | N    | N                | N                      | 38.5                        | N     | N           | N       | N            | N        | N        | N       |
| 1                                  | Discovery | CP-329 | 2                     | 64        | 155        | 70         | y                                   | N        | N                   | Y                       | Y    | N                | N                      | 37.4                        | Y     | N           | N       | N            | N        | N        | Y       |
| 1                                  | Discovery | CP-330 | 2                     | 46        | 162        | 56         | y                                   | N        | N                   | N                       | N    | N                | N                      | 37.2                        | Y     | N           | N       | N            | N        | N        | N       |
| 1                                  | Discovery | CP-331 | 2                     | 55        | 157        | 60         | y                                   | N        | N                   | N                       | N    | N                | N                      | 37                          | Y     | N           | N       | N            | N        | N        | N       |
| 1                                  | Discovery | CP-334 | 1                     | 62        | 170        | 82         | y                                   | N        | Y                   | Y                       | N    | N                | N                      | 39.3                        | N     | N           | N       | N            | N        | N        | N       |
| 1                                  | Discovery | CP-335 | 1                     | 35        | 170        | 74         | y                                   | N        | N                   | N                       | N    | N                | N                      | 37                          | Y     | N           | N       | N            | N        | N        | N       |
| 1                                  | Discovery | CP-337 | 2                     | 48        | 175        | 68         | y                                   | N        | N                   | N                       | N    | N                | N                      | 37.2                        | Y     | N           | N       | N            | Y        | N        | N       |
| 1                                  | Discovery | CP-338 | 1                     | 54        | 175        | 62         | y                                   | Y        | N                   | Y                       | N    | N                | N                      | 37                          | Y     | N           | N       | N            | N        | N        | N       |
| 1                                  | Discovery | CP-344 | 2                     | 36        | 160        | 53         | n                                   | N        | N                   | N                       | N    | N                | N                      | 37.2                        | N     | N           | N       | N            | N        | N        | N       |
| 1                                  | Discovery | CP-345 | 1                     | 71        | 168        | 69         | y                                   | N        | N                   | N                       | N    | N                | N                      | 38.2                        | Y     | N           | N       | Y            | N        | N        | N       |
| 1                                  | Discovery | CP-348 | 1                     | 12        | 165        | 52         | n                                   | N        | N                   | N                       | N    | N                | N                      | 37.2                        | Y     | N           | N       | N            | N        | N        | N       |
| 1                                  | Discovery | CP-349 | 1                     | 30        | 178        | 75         | y                                   | N        | N                   | N                       | N    | N                | N                      | 38                          | N     | N           | N       | N            | N        | N        | N       |
| 1                                  | Discovery | CP-351 | 2                     | 58        | 153        | 55         | y                                   | N        | N                   | N                       | N    | N                | N                      | 38.6                        | Y     | N           | N       | N            | N        | N        | N       |
| 1                                  | Discovery | CP-352 | 1                     | 25        | 170        | 65         | n                                   | N        | N                   | N                       | N    | N                | N                      | 38                          | N     | N           | N       | N            | N        | N        | N       |
| 1                                  | Discovery | CP-353 | 1                     | 46        | 175        | 80         | y                                   | N        | N                   | N                       | N    | N                | N                      | 38.5                        | N     | N           | N       | N            | N        | N        | N       |
| 1                                  | Discovery | CP-354 | 2                     | 79        | 150        | 65         | n                                   | N        | N                   | N                       | N    | N                | N                      | 36.9                        | N     | N           | Y       | N            | N        | N        | N       |
| 1                                  | Discovery | CP-358 | 2                     | 56        | 157        | 60         | y                                   | N        | N                   | N                       | N    | N                | N                      | 37.5                        | Y     | N           | N       | N            | N        | N        | N       |
| 1                                  | Discovery | CP-361 | 1                     | 57        | 175        | 72         | y                                   | N        | N                   | N                       | N    | N                | N                      | 38.5                        | N     | N           | Y       | N            | Y        | N        | N       |
| 1                                  | Discovery | CP-362 | 1                     | 65        | 170        | 68         | n                                   | N        | N                   | N                       | N    | N                | N                      | 38.2                        | Y     | N           | N       | Y            | N        | N        | N       |
| 1                                  | Discovery | CP-363 | 1                     | 61        | 164        | 57         | n                                   | Y        | N                   | N                       | N    | N                | N                      | 39                          | N     | Y           | Y       | N            | N        | N        | N       |
| 1                                  | Discovery | CP-365 | 1                     | 48        | 168        | 67         | y                                   | N        | N                   | N                       | N    | N                | N                      | 37.4                        | N     | N           | Y       | N            | N        | N        | N       |
| 1                                  | Discovery | CP-366 | 1                     | 17        | 165        | 70         | y                                   | N        | N                   | N                       | N    | N                | N                      | 36.5                        | N     | N           | N       | N            | N        | N        | N       |

|   |            |          |    |    |     |     |   |   |   |   |   |   |   |      |   |   |   |   |   |   |
|---|------------|----------|----|----|-----|-----|---|---|---|---|---|---|---|------|---|---|---|---|---|---|
| 1 | Discovery  | CP-368   | 1  | 75 | 165 | 65  | y | N | N | N | N | N | N | 36.8 | N | N | N | N | N | N |
| 1 | Discovery  | CP-369   | 2  | 43 | 153 | 54  | n | N | N | N | N | N | N | 37.6 | N | N | N | N | N | N |
| 1 | Discovery  | CP-370   | 2  | 24 | 154 | 50  | y | N | N | N | N | N | N | 36.2 | N | N | N | N | N | N |
| 1 | Discovery  | CP-371   | 1  | 57 | 172 | 80  | y | N | N | N | N | N | N | 36.5 | N | N | N | Y | N | N |
| 1 | Discovery  | CP-372   | 1  | 68 | 175 | 69  | y | N | N | N | N | N | N | 38.5 | Y | N | N | N | N | N |
| 1 | Discovery  | CP-375   | 1  | 39 | 160 | 80  | y | N | N | N | N | N | N | 37.4 | Y | N | N | N | N | N |
| 1 | Discovery  | CP-376   | 1  | 40 | 178 | 78  | y | N | N | N | N | N | Y | 38.9 | N | N | N | N | N | N |
| 1 | Validation | CP-303   | 2  | 56 | 156 | 62  | y | N | N | N | N | N | N | 36.8 | Y | Y | Y | N | Y | N |
| 1 | Validation | CP-309   | 1  | 39 | 179 | 80  | y | N | N | N | N | N | N | 36.8 | N | N | N | N | N | N |
| 1 | Validation | CP-322   | 1  | 47 | 175 | 72  | y | N | Y | N | N | N | N | 37.3 | Y | N | Y | N | N | N |
| 1 | Validation | CP-327   | 1  | 62 | 175 | 60  | y | N | N | N | N | N | N | 38   | N | N | N | N | Y | N |
| 1 | Validation | CP-328   | 1  | 61 | 175 | 60  | y | N | Y | N | N | N | N | 37.1 | Y | N | N | N | N | N |
| 1 | Validation | CP-332   | 2  | 46 | 155 | 60  | y | N | N | N | N | N | N | 36.5 | N | N | N | N | N | N |
| 1 | Validation | CP-333   | 1  | 53 | 170 | 60  | y | N | N | N | N | N | N | 38   | Y | N | N | N | N | N |
| 1 | Validation | CP-336   | 2  | 54 | 148 | 44  | y | N | Y | N | N | N | N | 37.2 | Y | N | N | N | Y | N |
| 1 | Validation | CP-339   | 1  | 56 | 170 | 85  | y | N | N | N | N | N | N | 38.3 | N | N | Y | N | N | Y |
| 1 | Validation | CP-340   | 2  | 58 | 165 | 55  | y | N | N | Y | N | N | N | 36.8 | N | N | N | N | N | N |
| 1 | Validation | CP-343   | 1  | 25 | 176 | 68  | y | N | N | N | N | N | N | 38   | Y | N | N | N | N | N |
| 1 | Validation | CP-346   | 2  | 68 | 155 | 56  | n | N | N | N | N | N | N | 39.2 | Y | N | N | Y | N | N |
| 1 | Validation | CP-347   | 1  | 48 | 173 | 90  | y | N | N | N | N | N | N | 38   | Y | N | N | Y | N | N |
| 1 | Validation | CP-350   | 2  | 46 | 161 | 54  | y | N | N | N | N | N | N | 37.4 | Y | N | N | N | N | N |
| 1 | Validation | CP-355   | 1  | 22 | 180 | 100 | y | N | N | N | N | N | N | 37.7 | N | N | N | N | N | N |
| 1 | Validation | CP-356   | 1  | 46 | 168 | 76  | y | N | Y | N | N | N | N | 36.6 | Y | N | N | N | N | N |
| 1 | Validation | CP-357   | 2  | 49 | 165 | 50  | y | N | N | N | N | N | N | 38.2 | Y | N | N | N | N | N |
| 1 | Validation | CP-359   | 1  | 35 | 176 | 74  | y | N | N | N | N | N | N | 39   | Y | Y | Y | N | N | N |
| 1 | Validation | CP-359-2 | 1  | 55 | 172 | 70  | y | N | N | N | N | N | N | 38   | Y | N | Y | N | N | N |
| 1 | Validation | CP-360   | 1  | 30 | 172 | 85  | y | N | N | N | N | N | N | 38.2 | Y | N | Y | N | N | N |
| 1 | Validation | CP-364   | 2  | 53 | 158 | 60  | y | N | N | N | N | N | N | 38   | Y | N | N | N | N | N |
| 1 | Validation | CP-367   | 2  | 76 | 154 | 60  | y | N | N | N | N | N | N | 36.6 | N | N | N | N | N | N |
| 1 | Validation | CP-373   | 1  | 29 | 178 | 75  | y | N | N | N | N | N | N | 38.1 | Y | N | N | Y | N | N |
| 1 | Validation | CP-374   | 1  | 14 | 163 | 52  | n | N | N | N | N | N | N | 37.2 | N | N | N | N | N | Y |
| 2 | Discovery  | CP-302   | 45 | 2  | 160 | 73  | y | N | N | N | N | N | N | 38.2 | N | N | N | N | N | N |
| 2 | Discovery  | CP-303   | 56 | 2  | 156 | 62  | y | N | N | N | N | N | N | 36.8 | Y | Y | Y | N | Y | N |
| 2 | Discovery  | CP-304   | 40 | 1  | 168 | 89  | n | N | N | N | N | N | N | 39.2 | Y | N | Y | Y | N | Y |
| 2 | Discovery  | CP-305   | 39 | 1  | 165 | 75  | y | N | N | N | N | N | N | 38.8 | N | N | N | N | N | N |
| 2 | Discovery  | CP-307   | 56 | 2  | 160 | 60  | y | Y | N | N | N | N | N | 38.1 | N | N | N | N | N | N |
| 2 | Discovery  | CP-310   | 50 | 1  | 173 | 80  | y | N | N | N | N | N | N | 37.7 | N | N | N | N | N | N |
| 2 | Discovery  | CP-311   | 51 | 2  | 160 | 60  | y | N | N | N | N | N | N | 38.1 | Y | N | Y | N | Y | N |
| 2 | Discovery  | CP-312   | 55 | 2  | 169 | 65  | y | Y | N | N | N | N | N | 39.5 | N | N | N | N | N | N |
| 2 | Discovery  | CP-313   | 40 | 1  | 170 | 61  | y | N | N | N | N | N | N | 38.8 | N | N | N | N | N | N |
| 2 | Discovery  | CP-314   | 41 | 2  | 158 | 58  | y | N | N | N | N | N | N | 37.5 | N | N | N | N | N | N |
| 2 | Discovery  | CP-315   | 44 | 2  | 162 | 62  | y | N | N | N | N | N | N | 37.6 | N | N | N | N | N | N |
| 2 | Discovery  | CP-317   | 51 | 1  | 172 | 85  | y | N | N | N | N | N | N | 38.5 | N | N | N | N | N | N |
| 2 | Discovery  | CP-320   | 65 | 2  | 155 | 68  | N | N | Y | N | N | N | N | 38.1 | N | N | N | Y | N | N |
| 2 | Discovery  | CP-324   | 50 | 2  | 159 | 59  | n | Y | N | N | N | N | N | 38.2 | N | N | N | N | N | N |
| 2 | Discovery  | CP-344   | 36 | 2  | 160 | 53  | n | N | N | N | N | N | N | 37.2 | N | N | N | N | N | N |
| 2 | Discovery  | CP-346   | 68 | 2  | 155 | 56  | n | N | N | N | N | N | N | 39.2 | Y | N | N | Y | N | N |

|   |            |          |    |    |     |      |   |   |   |   |   |   |   |      |   |   |   |   |   |   |
|---|------------|----------|----|----|-----|------|---|---|---|---|---|---|---|------|---|---|---|---|---|---|
| 2 | Discovery  | CP-349   | 30 | 1  | 178 | 75   | y | N | N | N | N | N | N | 38   | N | N | N | N | N | N |
| 2 | Discovery  | CP-350   | 46 | 2  | 161 | 54   | y | N | N | N | N | N | N | 37.4 | Y | N | N | N | N | N |
| 2 | Discovery  | CP-351   | 58 | 2  | 153 | 55   | y | N | N | N | N | N | N | 38.6 | Y | N | N | N | N | N |
| 2 | Discovery  | CP-352   | 25 | 1  | 170 | 65   | n | N | N | N | N | N | N | 38   | N | N | N | N | N | N |
| 2 | Discovery  | CP-353   | 46 | 1  | 175 | 80   | y | N | N | N | N | N | N | 38.5 | N | N | N | N | N | N |
| 2 | Discovery  | CP-357   | 49 | 2  | 165 | 50   | y | N | N | N | N | N | N | 38.2 | Y | N | N | N | N | N |
| 2 | Discovery  | CP-359-2 | 55 | 1  | 172 | 70   | y | N | N | N | N | N | N | 38   | Y | N | Y | N | N | N |
| 2 | Discovery  | CP-361   | 57 | 1  | 175 | 72   | y | N | N | N | N | N | N | 38.5 | N | N | Y | N | Y | N |
| 2 | Validation | CP-301   | 2  | 50 | 168 | 64   | y | N | N | N | N | N | N | 37.5 | N | N | N | N | N | N |
| 2 | Validation | CP-306   | 1  | 46 | 176 | 70   | y | N | N | N | N | N | Y | 39.3 | N | N | N | N | N | N |
| 2 | Validation | CP-308   | 1  | 47 | 176 | 72   | y | N | N | N | N | N | N | 37.9 | N | N | N | N | N | N |
| 2 | Validation | CP-309   | 1  | 39 | 179 | 80   | y | N | N | N | N | N | N | 36.8 | N | N | N | N | N | N |
| 2 | Validation | CP-316   | 2  | 49 | 159 | 56   | y | N | N | N | N | N | N | 38.1 | N | N | N | N | N | N |
| 2 | Validation | CP-341   | 1  | 35 | 148 | 48   | n | N | N | Y | N | N | N | 38.5 | Y | N | N | N | N | N |
| 2 | Validation | CP-343   | 1  | 25 | 176 | 68   | y | N | N | N | N | N | N | 38   | Y | N | N | N | N | N |
| 2 | Validation | CP-345   | 1  | 71 | 168 | 69   | y | N | N | N | N | N | N | 38.2 | Y | N | N | Y | N | N |
| 2 | Validation | CP-347   | 1  | 48 | 173 | 90   | y | N | N | N | N | N | N | 38   | Y | N | N | Y | N | N |
| 2 | Validation | CP-355   | 1  | 22 | 180 | 100  | y | N | N | N | N | N | N | 37.7 | N | N | N | N | N | N |
| 2 | Validation | CP-356   | 1  | 46 | 168 | 76   | y | N | Y | N | N | N | N | 36.6 | Y | N | N | N | N | N |
| 2 | Validation | CP-360   | 1  | 30 | 172 | 85   | y | N | N | N | N | N | N | 38.2 | Y | N | Y | N | N | N |
| 1 | Hangzhou   | HZ-01    | 1  | 71 | 168 | 76   | y | N | Y | N | N | N | Y | 38.8 | Y | N | Y | Y | N | N |
| 1 | Hangzhou   | HZ-02    | 2  | 36 | 160 | 45   | y | N | N | N | N | N | N | 37.5 | Y | N | N | Y | N | N |
| 1 | Hangzhou   | HZ-03    | 1  | 46 | 172 | 60   | y | N | N | N | N | N | N | 38.9 | Y | N | N | Y | N | N |
| 1 | Hangzhou   | HZ-04    | 1  | 30 | 175 | 56   | y | N | N | N | N | N | N | 36.9 | N | Y | Y | N | Y | N |
| 1 | Hangzhou   | HZ-05    | 1  | 51 | 173 | 80   | y | Y | N | N | N | N | Y | 37.6 | Y | N | N | Y | Y | N |
| 1 | Hangzhou   | HZ-06    | 2  | 34 | 160 | 62   | y | N | N | N | N | N | N | 39.3 | Y | N | N | Y | N | N |
| 1 | Hangzhou   | HZ-07    | 2  | 45 | 165 | 50.5 | y | N | N | N | N | N | N | 38.5 | Y | N | N | N | N | N |
| 1 | Hangzhou   | HZ-08    | 1  | 35 | 175 | 75   | y | N | N | N | N | N | N | 38.3 | Y | N | N | Y | N | N |
| 1 | Hangzhou   | HZ-09    | 2  | 48 | 163 | 55   | y | N | N | N | N | N | N | 37.3 | N | N | N | N | N | N |
| 1 | Hangzhou   | HZ-10    | 2  | 59 | 158 | 71   | y | N | N | N | N | N | N | 37.4 | Y | N | N | Y | N | N |
| 1 | Hangzhou   | HZ-11    | 2  | 47 | 161 | 57   | y | N | N | N | N | N | N | 37.3 | Y | N | N | N | N | N |
| 1 | Hangzhou   | HZ-12    | 2  | 43 | 164 | 60   | y | N | N | N | N | N | N | 38.6 | Y | N | N | Y | N | N |
| 1 | Hangzhou   | HZ-13    | 1  | 31 | 160 | 60   | y | N | N | N | N | N | Y | 38   | Y | N | N | Y | Y | N |
| 1 | Hangzhou   | HZ-14    | 1  | 61 | 167 | 70   | y | N | Y | N | N | N | N | 36.9 | Y | N | N | Y | Y | N |
| 1 | Hangzhou   | HZ-15    | 1  | 64 | 173 | 100  | y | Y | N | N | N | N | Y | 37.4 | Y | N | N | N | N | Y |
| 1 | Hangzhou   | HZ-16    | 2  | 63 | 157 | 60   | y | N | Y | N | N | N | N | 37.2 | N | N | N | N | N | N |
| 1 | Hangzhou   | HZ-17    | 2  | 57 | 159 | 55   | y | N | N | N | N | N | N | 36.9 | Y | N | N | N | N | Y |
| 1 | Hangzhou   | HZ-18    | 2  | 57 | 160 | 62   | y | N | N | N | N | N | N | 37.2 | Y | N | N | Y | N | N |
| 1 | Hangzhou   | HZ-19    | 1  | 66 | 175 | 65   | y | N | Y | N | N | N | N | 37.4 | Y | Y | Y | Y | N | N |
| 1 | Hangzhou   | HZ-20    | 2  | 48 | 156 | 65   | y | N | N | N | N | N | Y | 38.3 | Y | N | N | Y | N | Y |
| 1 | Hangzhou   | HZ-21    | 1  | 29 | 178 | 80   | y | N | N | N | N | N | N | 37.1 | Y | N | N | N | N | Y |
| 1 | Hangzhou   | HZ-22    | 2  | 37 | 158 | 53.5 | y | N | Y | N | N | N | N | 37.8 | Y | Y | Y | N | N | Y |
| 1 | Hangzhou   | HZ-23    | 1  | 66 | 174 | 62   | y | N | N | N | N | N | N | 37   | N | Y | N | N | N | N |
| 1 | Hangzhou   | HZ-24    | 1  | 55 | 170 | 90   | y | N | N | N | N | N | N | 39.1 | Y | N | Y | N | N | N |
| 1 | Hangzhou   | HZ-25    | 2  | 30 | 152 | 52.5 | y | N | N | N | N | N | N | 37.2 | Y | N | N | N | N | N |
| 1 | Hangzhou   | HZ-26    | 1  | 53 | 170 | 80   | y | N | Y | N | N | N | N | 36.8 | Y | N | N | N | N | N |
| 1 | Hangzhou   | HZ-27    | 2  | 70 | 163 | 55   | y | N | N | N | N | N | N | 37.6 | Y | N | Y | Y | N | N |

|   |          |       |   |    |     |      |   |   |   |   |   |   |   |      |   |   |   |   |   |   |   |
|---|----------|-------|---|----|-----|------|---|---|---|---|---|---|---|------|---|---|---|---|---|---|---|
| 1 | Hangzhou | HZ-28 | 1 | 53 | 170 | 80   | y | N | Y | N | N | N | N | 38   | Y | Y | Y | Y | N | N | N |
| 1 | Hangzhou | HZ-29 | 1 | 74 | 167 | 77.5 | y | N | Y | N | N | N | N | 38   | Y | Y | Y | Y | N | N | Y |
| 1 | Hangzhou | HZ-30 | 2 | 64 | 153 | 44.5 | y | N | N | N | N | N | N | 38.8 | Y | Y | N | Y | Y | N | N |
| 1 | Hangzhou | HZ-31 | 2 | 29 | 161 | 52   | y | N | N | N | N | N | N | 37.5 | Y | N | Y | Y | N | N | N |
| 1 | Hangzhou | HZ-32 | 1 | 13 | 165 | 52.5 | y | N | N | N | N | N | N | 37.4 | N | N | N | N | N | N | N |
| 1 | Hangzhou | HZ-33 | 2 | 38 | 162 | 54   | y | N | N | N | N | N | N | 37.6 | Y | N | N | N | N | N | N |
| 1 | Hangzhou | HZ-34 | 1 | 56 | 163 | 70   | y | Y | Y | N | N | N | N | 37.1 | Y | N | N | Y | N | N | N |
| 1 | Hangzhou | HZ-35 | 1 | 62 | 166 | 65   | y | Y | Y | Y | N | N | N | 39.3 | Y | Y | Y | Y | N | N | N |
| 1 | Hangzhou | HZ-36 | 1 | 48 | 172 | 100  | y | Y | Y | N | N | N | N | 38.9 | Y | N | N | Y | N | Y | N |
| 1 | Hangzhou | HZ-37 | 2 | 58 | 164 | 50   | y | N | Y | N | N | N | N | 40.2 | Y | Y | Y | Y | Y | N | N |
| 1 | Hangzhou | HZ-38 | 1 | 29 | 171 | 63   | y | N | N | N | N | N | N | 37.2 | N | N | N | N | N | N | N |
| 1 | Hangzhou | HZ-39 | 1 | 53 | 172 | 86   | y | N | Y | N | N | N | N | 39.5 | Y | Y | N | N | Y | N | N |
| 1 | Hangzhou | HZ-40 | 1 | 55 | 181 | 80   | y | N | N | N | N | N | N | 39.3 | N | N | N | N | N | N | N |
| 1 | Hangzhou | HZ-41 | 1 | 60 | 172 | 71   | y | N | Y | N | N | N | N | 37.5 | Y | Y | Y | N | Y | Y | Y |
| 1 | Hangzhou | HZ-42 | 1 | 48 | 172 | 78   | y | N | Y | N | N | N | N | 38   | Y | N | Y | Y | N | Y | N |
| 1 | Hangzhou | HZ-43 | 1 | 52 | 172 | 71.5 | y | Y | Y | N | N | N | N | 37.5 | Y | N | N | Y | N | N | N |
| 1 | Hangzhou | HZ-44 | 1 | 62 | 172 | 52.5 | y | N | N | N | N | N | N | 37.2 | N | Y | N | N | N | N | N |
| 1 | Hangzhou | HZ-45 | 2 | 66 | 155 | 70   | y | N | N | N | N | N | N | 38.2 | N | N | N | N | N | N | N |
| 1 | Hangzhou | HZ-46 | 2 | 67 | 163 | 65.5 | y | N | Y | N | N | N | Y | 37.5 | Y | N | N | Y | N | N | N |
| 1 | Hangzhou | HZ-47 | 1 | 51 | 170 | 67   | y | N | N | N | N | N | N | 40.1 | Y | Y | Y | N | Y | N | Y |
| 1 | Hangzhou | HZ-48 | 1 | 54 | 175 | 88   | y | N | N | N | N | N | N | 37.5 | Y | N | N | N | N | N | N |
| 1 | Hangzhou | HZ-49 | 2 | 50 | 162 | 67.5 | y | N | N | N | N | N | N | 37.7 | Y | Y | Y | Y | N | N | N |
| 1 | Hangzhou | HZ-50 | 1 | 50 | 180 | 70   | y | N | N | N | N | N | N | 37.2 | N | Y | N | N | N | N | N |
| 1 | Hangzhou | HZ-51 | 2 | 38 | 160 | 77   | y | N | N | N | N | N | N | 39   | Y | N | Y | N | N | N | N |
| 1 | Hangzhou | HZ-52 | 1 | 30 | 179 | 60   | y | N | N | N | N | N | N | 39.3 | N | N | N | N | N | N | N |
| 1 | Hangzhou | HZ-53 | 2 | 45 | 162 | 63   | y | N | Y | N | N | N | Y | 38.6 | Y | N | Y | Y | N | N | N |
| 1 | Hangzhou | HZ-54 | 2 | 54 | 160 | 56   | y | N | N | N | N | N | N | 37.4 | Y | N | N | N | N | N | N |
| 1 | Hangzhou | HZ-55 | 1 | 59 | 175 | 90   | y | Y | Y | N | N | N | N | 37   | Y | N | N | N | N | N | N |
| 1 | Hangzhou | HZ-56 | 2 | 66 | 153 | 60   | y | N | N | N | N | N | N | 37.2 | Y | N | N | N | N | N | N |
| 1 | Hangzhou | HZ-57 | 1 | 36 | 170 | 77   | y | N | N | N | N | N | N | 37.5 | Y | N | N | Y | N | N | N |
| 1 | Hangzhou | HZ-58 | 1 | 62 | 168 | 65   | y | N | Y | Y | N | N | N | 38.1 | Y | N | N | Y | N | N | N |
| 1 | Hangzhou | HZ-59 | 2 | 24 | 157 | 52.3 | y | N | N | N | N | N | N | 37.5 | N | N | N | N | N | N | N |
| 1 | Hangzhou | HZ-60 | 1 | 34 | 171 | 72   | y | N | N | N | N | N | Y | 37.9 | Y | N | N | Y | N | N | N |
| 1 | Hangzhou | HZ-61 | 2 | 53 | 152 | 60   | y | N | N | N | N | N | N | 38.1 | Y | N | N | N | N | N | N |
| 1 | Hangzhou | HZ-62 | 1 | 45 | 166 | 61   | y | N | N | N | N | N | N | 38.8 | Y | N | N | N | N | N | N |
| 1 | Hangzhou | HZ-63 | 2 | 55 | 160 | 62.4 | y | N | N | N | N | N | N | 37.2 | Y | N | N | N | N | N | N |
| 1 | Hangzhou | HZ-64 | 2 | 39 | 165 | 56   | y | N | N | N | N | N | N | 37.3 | Y | N | N | N | N | N | N |
| 1 | Hangzhou | HZ-65 | 1 | 44 | 170 | 75   | y | N | N | N | N | N | Y | 38.2 | Y | N | N | Y | N | N | N |
| 1 | Hangzhou | HZ-66 | 2 | 64 | 162 | 65   | y | N | N | N | N | N | Y | 37.8 | Y | N | N | N | N | N | N |
| 1 | Hangzhou | HZ-67 | 1 | 62 | 178 | 75   | y | N | Y | N | N | N | N | 36.9 | N | N | Y | N | N | N | N |
| 1 | Hangzhou | HZ-68 | 1 | 48 | 168 | 77   | y | N | Y | N | N | N | N | 37   | N | Y | Y | N | N | N | N |
| 1 | Hangzhou | HZ-69 | 2 | 30 | 164 | 67   | y | N | N | N | N | N | N | 37.4 | Y | Y | Y | Y | N | Y | N |
| 1 | Hangzhou | HZ-70 | 1 | 29 | 162 | 66   | y | N | N | N | N | N | N | 37.5 | Y | N | N | N | N | N | N |
| 1 | Hangzhou | HZ-71 | 2 | 39 | 168 | 69   | y | N | N | N | N | N | N | 37.2 | Y | N | Y | Y | N | N | N |
| 1 | Hangzhou | HZ-72 | 1 | 72 | 165 | 65   | y | N | Y | N | N | N | N | 37.5 | Y | N | Y | N | N | N | Y |
| 1 | Hangzhou | HZ-73 | 2 | 43 | 163 | 60   | y | N | N | N | N | N | N | 37.6 | Y | N | N | N | N | N | N |
| 1 | Hangzhou | HZ-74 | 1 | 37 | 175 | 75   | y | N | N | N | N | N | N | 37.7 | N | N | Y | N | N | N | N |

| Red blood cell (10 <sup>9</sup> /L) | White blood cell (10 <sup>9</sup> /L) | Neutrophil (10 <sup>9</sup> /L) | Lymphocyte (10 <sup>9</sup> /L) | Hemoglobin (g/L) | Platelet (10 <sup>9</sup> /L) | Prothrombin time (s) | Activated partial thromboplastin time (s) | ALT (U/L) | AST (U/L) | Total bilirubin (mmol/L) | Potassium ion (mmol/L) | Sodium (mmol/L) | Creatinine (μmol/L) | Creatine kinase (U/L) | Lactic dehydrogenase (U/L) | hs-cTnI, pg/mL | PCT (ng/mL) | CRP (ng/mL) | ESR (mm/h) |
|-------------------------------------|---------------------------------------|---------------------------------|---------------------------------|------------------|-------------------------------|----------------------|-------------------------------------------|-----------|-----------|--------------------------|------------------------|-----------------|---------------------|-----------------------|----------------------------|----------------|-------------|-------------|------------|
| 4.51                                | 3.21                                  | 1.51                            | 1.42                            | 129              | 128                           | 10.8                 | 25.2                                      | 12.5      | 21.8      | 6.6                      | 4                      | 144.3           | 46.7                | 33.2                  | 179.8                      | 0.53           | 0.14        | 13.4        | 44         |
| 5                                   | 4.51                                  | 2.25                            | 1.9                             | 150              | 124                           | 10.6                 | 23.8                                      | 43.9      | 34.2      | 12.6                     | 3.46                   | 139.6           | 67.4                | 104.4                 | 266.9                      | 0.52           | 0.2         | <10         | 64         |
| 4.87                                | 8.13                                  | 6.24                            | 1.35                            | 146              | 213                           | 363                  | 21.5                                      | 28.2      | 23.5      | 9.1                      | 5.75                   | 146.2           | 68.3                | 46.1                  | 275.4                      | 0.26           | 0.14        | 15          | 81         |
| 4.75                                | 3.06                                  | 1.48                            | 1.48                            | 139              | 291                           | 14.3                 | 25.2                                      | 9.2       | 15.3      | 14.5                     | 3.97                   | 109.5           | 57                  | 101.3                 | 153.6                      | 0.53           | <0.1        | <10         | 26         |
| 4.56                                | 5.13                                  | 3.5                             | 1.35                            | 138              | 241                           | 17.3                 | 31.3                                      | 31.5      | 36.3      | 17.4                     | 4.75                   | 136.3           | 85.3                | 41                    | 245.2                      | 0.41           | 0.24        | 23.5        | 21         |
| 4.21                                | 3.53                                  | 3.09                            | 0.45                            | 136              | 146                           | 17.5                 | 30.2                                      | 27.4      | 21.5      | 7.4                      | 5.32                   | 135.3           | 67.3                | 63                    | 274.3                      | 0.53           | 0.21        | 53.2        | 87         |
| 4.56                                | 3.13                                  | 2.08                            | 0.91                            | 137              | 118                           | 14.2                 | 31.4                                      | 44.6      | 27.5      | 18.4                     | 3.88                   | 140.8           | 63.3                | 65.9                  | 303.9                      | 0.6            | <0.1        | 22          | 14         |
| 6.46                                | 6.43                                  | 3.6                             | 2.35                            | 184              | 147                           | 21.6                 | 28.2                                      | 74.4      | 35        | 11.2                     | 5.25                   | 140.7           | 128.8               | 163.5                 | 249.4                      | 1.26           | 0.19        | 10.3        | 34         |
| 3.93                                | 2.94                                  | 1.73                            | 0.93                            | 116              | 122                           | 11.3                 | 28.6                                      | 11        | 10.3      | 14.5                     | 4.02                   | 141.5           | 60.5                | 36.2                  | 180.8                      | 0.72           | <0.1        | >10         | 60         |
| 4.16                                | 3.87                                  | 2.37                            | 0.99                            | 132              | 142                           | 10.5                 | 29.3                                      | 18.2      | 20.3      | 7.8                      | 5.23                   | 139.4           | 70.2                | 103                   | 180.3                      | 0.45           | 0.14        | 26.8        | 46         |
| 5.32                                | 3.82                                  | 2.98                            | 0.72                            | 159              | 209                           | 13.5                 | 27.5                                      | 20.5      | 35.3      | 11.4                     | 4.25                   | 135.3           | 74.2                | 180.3                 | 370.4                      | 0.01           | 0.13        | 17.5        | 7          |
| 3.88                                | 4.83                                  | 2.21                            | 2.27                            | 118              | 165                           | 10.2                 | 24.7                                      | 21.8      | 25.7      | 6.5                      | 3.78                   | 143.1           | 54.3                | 46.5                  | 178.2                      | 0.51           | <0.1        | <10         | 44         |
| 3.13                                | 2.42                                  | 1.78                            | 0.56                            | 120              | 89                            | 9.2                  | 21                                        | 20.2      | 25.3      | 9.45                     | 4.01                   | 139.2           | 56                  | 102.4                 | 198.2                      | 0.02           | 0.13        | 53.4        | 99         |
| 4.47                                | 10.82                                 | 8.92                            | 1.51                            | 136              | 319                           | 9.2                  | 23.2                                      | 19.6      | 16.1      | 9.24                     | 5.56                   | 140.8           | 47.9                | 32                    | 221.2                      | 0.01           | 0.13        | 10.1        | 5          |
| 5.59                                | 6.07                                  | 4.42                            | 1.27                            | 172              | 150                           | 12.6                 | 21.5                                      | 41.2      | 24.3      | 19.34                    | 4.01                   | 139             | 67.5                | 28.5                  | 180.1                      | 0.01           | 0.19        | <10         | 47         |
| 4.42                                | 5.13                                  | 4.13                            | 1.09                            | 135              | 287                           | 10.56                | 18.2                                      | 20.3      | 30        | 15.2                     | 4.2                    | 145.2           | 48.5                | 30.1                  | 213                        | 0.67           | <0.1        | <10         | 53         |
| 5.56                                | 4.7                                   | 3.3                             | 1.19                            | 175              | 303                           | 11.2                 | 19.2                                      | 10.4      | 14.7      | 6.3                      | 2.87                   | 143.3           | 49.3                | 69                    | 195.8                      | 0.51           | 0.32        | 69.4        | 17         |
| 4.54                                | 5.39                                  | 3.3                             | 1.78                            | 126              | 211                           | 9.25                 | 28.8                                      | 17.7      | 22.8      | 8.5                      | 4.49                   | 138.3           | 43                  | 51.8                  | 234.8                      | 0.68           | 0.11        | <10         | 12         |
| 3.58                                | 3.09                                  | 1.98                            | 1.04                            | 123              | 180                           | 11.3                 | 25.2                                      | 28.2      | 29.2      | 7.2                      | 4.3                    | 140.2           | 60.2                | 58.3                  | 210.3                      | 0.56           | 0.2         | <10         | 60         |
| 4.94                                | 11.8                                  | 10.25                           | 1.06                            | 144              | 374                           | 9.2                  | 21.2                                      | 34        | 18        | 26.3                     | 3.33                   | 142.2           | 65.3                | 148                   | 343                        | 0.02           | 0.13        | 61.4        | 118        |
| 3.33                                | 5.6                                   | 3.7                             | 1.53                            | 117              | 150                           | 13.2                 | 25.2                                      | 16        | 25        | 41.5                     | 3.69                   | 140.7           | 84.2                | 58                    | 190                        | 0.04           | 0.19        | 55.5        | 135        |
| 4.14                                | 4.3                                   | 3                               | 0.96                            | 91               | 230                           | 10                   | 29.4                                      | 39        | 29        | 20                       | 3.2                    | 139             | 52.8                | 25                    | 129                        | 0.06           | 0.02        | 18.01       | 73         |
| 4.22                                | 7.1                                   | 4.51                            | 2.06                            | 125              | 287                           | N                    | N                                         | 12        | 15        | 13.1                     | 3.56                   | 139.7           | 57.8                | 32                    | 163                        | 0.01           | 0.19        | 5.3         | 115        |
| 5.11                                | 6.9                                   | 6.03                            | 0.71                            | 150              | 116                           | 11.9                 | 25.3                                      | 56        | 71        | 12                       | 3.87                   | 138.5           | 76.7                | 436                   | 402                        | 0.52           | 0.29        | 67.2        | 48         |
| 5.11                                | 8.1                                   | 4.54                            | 2.79                            | 150              | 330                           | 11.6                 | 23.1                                      | 15        | 11        | 22                       | 3.64                   | 141.8           | 72.1                | 25                    | 133                        | 0.57           | 0.34        | 0.3         | 15         |
| 4.26                                | 5.3                                   | 3.54                            | 1.44                            | 113              | 269                           | 18.2                 | 25.2                                      | 8         | 16        | 37.2                     | 2.97                   | 141.2           | 68                  | 44                    | 191                        | 0.47           | 0.19        | 4.9         | 110        |
| 5.1                                 | 6.9                                   | 4.48                            | 1.76                            | 154              | 210                           | N                    | N                                         | 13        | 9         | 20.2                     | 3.61                   | 140.3           | 57                  | 65                    | 141                        | 0.48           | 0.16        | 10.6        | 25         |
| 4.23                                | 2.64                                  | 4.08                            | 1.49                            | 108              | 128                           | 14.4                 | 37.2                                      | 7         | 14        | 6                        | 3.67                   | 141.6           | 53.7                | 46                    | 123                        | 0.42           | 0.04        | 26.3        | 45         |
| 5.15                                | 6.45                                  | 6.77                            | 0.69                            | 126              | 93                            | 132                  | 27.3                                      | 18        | 42        | 18.3                     | 3.52                   | 146.1           | 94.2                | 125                   | 363                        | 0.67           | 0.05        | 28.1        | 37         |
| 5.21                                | 4.75                                  | 5.62                            | 2.28                            | 137              | 177                           | 14                   | 38.3                                      | 8         | 20        | 2.8                      | 3.55                   | 142.8           | 52.2                | 66                    | 186                        | 0.34           | 0.04        | <3          | 23         |
| 5.23                                | 3.1                                   | 6.38                            | 1.65                            | 144              | 114                           | 15.8                 | 35.1                                      | 8         | 23        | 8.1                      | 3.8                    | 138.9           | 76.9                | 43                    | 215                        | N              | 0.04        | <3          | 8          |
| 4.21                                | 4.6                                   | 8.52                            | 1.09                            | 105              | 140                           | 15.5                 | 45.8                                      | 12        | 27        | 2.8                      | 3.08                   | 141.2           | 71.1                | 158                   | 296                        | 0.05           | 0.132       | 117.77      | 32         |
| 5.21                                | 6                                     | 4.09                            | 1.74                            | 152              | 199                           | 15                   | 34                                        | 18        | 27        | 34.3                     | 3.73                   | 140.1           | 92.7                | 61                    | 172                        | 0.13           | 0.04        | <3          | 10         |
| 5.25                                | 7.79                                  | 5.87                            | 1.32                            | 160              | 294                           | 13.2                 | 28.6                                      | 25        | 25        | 7.7                      | 4.03                   | 137.1           | 78.2                | 68                    | 165                        | 0.05           | 0.04        | 8.8         | 11         |
| 4                                   | 4.98                                  | 5.73                            | 2.03                            | 126              | 170                           | 14.5                 | 29.8                                      | 21        | 37        | 5.7                      |                        |                 | 59.9                | 61                    | 249                        |                | 0.051       | 20.67       |            |
| 4.98                                | 7.23                                  | 5.72                            | 1.09                            | 129              | 325                           | 12.1                 | 25.4                                      | 12        | 23        | 5.8                      | 3.8                    | 140.1           | 55                  | 25                    | 236                        | 0.02           | 0           | 38.08       | 127        |
| 4.63                                | 3.61                                  | 2.44                            | 0.91                            | 137              | 285                           | 12.5                 | 31                                        | 33        | 35        | 5.9                      | 3.7                    | 138.5           | 71                  | 38                    | 205                        | 0.31           | 0           | 15.4        | 43         |
| 5.23                                | 4.2                                   | 5.1                             | 2.25                            | 128              | 164                           | N                    | N                                         | 34        | 23        | 5.2                      | 3.8                    | 139.2           | 69                  | 42                    | 198                        | 0.07           | 0.14        | 1.3         | 19         |
| 4.79                                | 4.79                                  | 3.38                            | 0.89                            | 141              | 119                           | 12.5                 | 25.4                                      | 20.6      | 23.7      | 18.13                    | 4.28                   | 139.7           | 60.5                | 204                   | 210.9                      | 0.31           | 0.05        | 57.06       | 11         |
| 4.43                                | 4.78                                  | 4.23                            | 1.81                            | 141              | 133                           | 13.5                 | 27.4                                      | 44.3      | 29.2      | 14.07                    | 3.9                    | 138             | 93                  | 135.9                 | 164.8                      | 0.028          | 0.05        | 10.31       | 8          |
| 5.24                                | 4.31                                  | 2.14                            | 1.72                            | 155              | 209                           | 14.6                 | 31.1                                      | 15        | 16        | 10.9                     | 4.35                   | 139.9           | 74.9                | 98                    | 140                        | 0.25           | 0.04        | <3          | 7          |

|      |      |       |      |     |     |       |      |       |      |       |      |       |        |       |       |       |       |       |     |
|------|------|-------|------|-----|-----|-------|------|-------|------|-------|------|-------|--------|-------|-------|-------|-------|-------|-----|
| 5.21 | 3.84 | 6.19  | 1.69 | 165 | 187 | 13.8  | 26.5 | 33    | 26   | 8.4   | 4.32 | 140.9 | 62.5   | 59    | 151   | 0.03  | 0.06  | <3    | 4   |
| 4.13 | 5.18 | 3.37  | 1.87 | 138 | 219 | 14.6  | 30.1 | 15    | 17   | 7.7   | 4.41 | 138.5 | 47.3   | 72    | 141   | 0.036 | 0.04  | <3    | 2   |
| 4.37 | 5.98 | 2.79  | 2.83 | 135 | 162 | 14.6  | 33.3 | 13    | 18   | 19.6  | 3.58 | 137   | 42.1   | 59    | 110   | 0.043 | 0.04  | <3    | 9   |
| 4.8  | 5.54 | 3.69  | 1.5  | 342 | 159 | 12.8  | 27.3 | 38    | 27   | 8.5   | 4.31 | 136.4 | 79.4   | 56    | 127   | 0.06  | 0.12  | <3    | 6   |
| 4.9  | 6.04 | 8.43  | 15   | 120 | 94  | 15.2  | 26.7 | 15    | 45   | 18.1  | 5.02 | 140.6 | 94.8   | 124   | 408   | 0.36  | 0.05  | 27.8  | 14  |
| 4.32 | 7.19 | 3.84  | 2.65 | 135 | 61  | 13.6  | 28.4 | 40    | 27   | 9.4   | 4.38 | 140.1 | 78     | 101   | 152   | 0.025 | 0.03  | <3    | 5   |
| 5.04 | 6.23 | 5.39  | 1.52 | 160 | 205 | 13.2  | 28.6 | 23    | 26   | 8.5   | 4.03 | 137.1 | 80.3   | 68    | 165   | 0.05  | 0.04  | 8.8   | 11  |
| 4.21 | 3.5  | 1.49  | 1.73 | 137 | 183 | 9.8   | 24.9 | 22.6  | 0.89 | 9.4   | 4.82 | 142.2 | 53.6   | 76.2  | 183.6 | 0.38  | 0.21  | <10   | 20  |
| 5.32 | 3.53 | 2.53  | 0.95 | 153 | 136 | 13.5  | 21.5 | 30.2  | 21.5 | 34.2  | 3.51 | 146.2 | 135.2  | 85.3  | 204.2 | 0.4   | 0.14  | 35.2  | 10  |
| 4.89 | 8.18 | 6.08  | 1.71 | 142 | 410 | 9.6   | 27.8 | 111.9 | 33.2 | 12.8  | 4.12 | 140.6 | 54.9   | 138.7 | 240.9 | 0.64  | <0.1  | <10   | 30  |
| 4.21 | 12.3 | 10.95 | 1.03 | 124 | 240 | 11    | 23.2 | 14    | 10   | 46.3  | 3.99 | 139.8 | 86.6   | 23    | 112   | 0.2   | 0.2   | 22.3  | 40  |
| 5.08 | 8.3  | 5.79  | 1.94 | 160 | 138 | 11.5  | 24.2 | 10    | 20   | 53.8  | 3.66 | 140.4 | 77.3   | 23    | 148   | 0.23  | 0.14  | 37.3  | 52  |
| 3.8  | 5.7  | 3.53  | 1.75 | 114 | 210 | 11    | 23.4 | 38    | 31   | 19.8  | 3.77 | 138.9 | 49.7   | 37    | 182   | 0.67  | 0.16  | 6.8   | 34  |
| 5.22 | 4.9  | 3.17  | 1.23 | 150 | 179 | 12.3  | 24.1 | 18    | 24   | 28.1  | 3.16 | 138   | 79.5   | 7     | 225   | 0.68  | 0.29  | 24.5  | 50  |
| 3.65 | 6.2  | 5.12  | 0.63 | 106 | 308 | N     | N    | 10    | 15   | 5     | 6.14 | 131.4 | 1186.7 | 22    | 196   | 0.43  | 6.85  | 110.6 | 128 |
| 3.88 | 7    | 4.92  | 1.51 | 117 | 267 | 11.2  | 25.1 | 50    | 20   | 10.2  | 2.9  | 135   | 67.6   | 5     | 304   | 0.05  | 0.17  | <10   | 130 |
| 4.16 | 4.9  | 2.49  | 2.13 | 123 | 247 | 17.8  | 28.9 | 36.8  | 36.6 | 7.6   | 3.1  | 139   | 46.4   | 55.4  | 249.1 | 0.38  | N     | <10   | 44  |
| 4.25 | 8.59 | 3.18  | 1.21 | 161 | 319 | 14.9  | 27.6 | 23    | 23   | 7.7   | 3.84 | 138.1 | 103.2  | 101   | 196   | 0.31  | 0.07  | 35.3  | 46  |
| 4    | 4.98 | 7.54  | 2.18 | 126 | 170 | 14.5  | 29.8 | 21    | 37   | 5.7   | 3.64 | 139.2 | 59.9   | 61    | 249   | 0.45  | 0.051 | 20.67 | 39  |
| 3.57 | 5.22 | 8.21  | 0.75 | 156 | 196 | 14.9  | 33   | 40    | 26   | 8.4   | 3.51 | 138   | 202.2  | 45    | 215   | 0.64  | 0.34  | 16.65 | 67  |
| 4.75 | 3.73 | 5.37  | 1.28 | 102 | 132 | 16.9  | 38.7 | 23    | 48   | 11.6  | 3.98 | 140.9 | 88.5   | 50    | 219   | 0.02  | 0.04  | <3    | 14  |
| 5.11 | 4.57 | 2.72  | 1.42 | 153 | 259 | 9.7   | 25.8 | 74.4  | 79.3 | 8.6   | 5.77 | 142.4 | 94.5   | 539.6 | 561.6 | 0.8   | 0.11  | 136.3 | 87  |
| 4.23 | 4.98 | 4.23  | 0.73 | 139 | 223 | 13.5  | 36.2 | 29    | 15   | 10.3  | 3.73 | 142.3 | 56.2   | 46    | 159.3 | 0.53  | 0.12  | <10   | 13  |
| 5.02 | 2.36 | 1.36  | 0.83 | 151 | 113 | 12.7  | 33.9 | 20    | 24   | 4.8   | 3.6  | 139.4 | 57     | 42    | 179   | 0.01  | 0.13  | <10   | 13  |
| 4.23 | 4.55 | 2.87  | 1.15 | 138 | 163 | 11    | 25.6 | 47    | 45   | 8.8   | 3.2  | 138.9 | 57     | 56    | 212   | 0.34  | 0     | 10.63 | 2   |
| 3.56 | 5.34 | 3.78  | 1.08 | 139 | 173 | 12.5  | 23.6 | 30    | 31   | 7.2   | 3.4  | 139   | 83     | 388   | 215   | 0.25  | 0.09  | <10   | 6   |
| 4.23 | 4.15 | 3.13  | 0.71 | 164 | 176 | 13    | 27.9 | 35    | 28   | 6.5   | 4.2  | 142.2 | 77     | 83    | 204   | 0.27  | 0     | <10   | 16  |
| 5.23 | 3.61 | 4.16  | 6    | 132 | 193 | 13.2  | 22.5 | 21    | 25.2 | 8.2   | 6.2  | 139.2 | 46     | 45    | 153   | 0.23  | 0.21  | 20.4  | 29  |
| 4.25 | 5.37 | 3.28  | 1.65 | 115 | 210 | 12.7  | 23.4 | 30    | 40   | 6.4   | 4.25 | 142.9 | 46.8   | 86    | 192   | 0.025 | 0.04  | <3    | 20  |
| 5.12 | 7.53 | 4.84  | 2.06 | 145 | 227 | 14.2  | 35.2 | 18    | 17   | 14    | 4.27 | 140.3 | 64.2   | 74    | 137   | 0.025 | 0.18  | <3    | 4   |
| 5.23 | 3.1  | 5.74  | 0.93 | 125 | 98  | 13.2  | 33.6 | 17    | 26   | 6.4   | 4.45 | 138.1 | 48.4   | 129   | 156   | 0.64  | 0.2   | 3.54  | 12  |
| 5    | 4.51 | 2.25  | 1.9  | 150 | 124 | 10.6  | 23.8 | 43.9  | 34.2 | 12.6  | 3.46 | 139.6 | 67.4   | 104.4 | 266.9 | 0.52  | 0.2   | ≤10   | 64  |
| 4.21 | 3.5  | 1.49  | 1.73 | 137 | 183 | 9.8   | 24.9 | 22.6  | 0.89 | 9.4   | 4.82 | 142.2 | 53.6   | 76.2  | 183.6 | 0.38  | 0.21  | <10   | 20  |
| 4.87 | 8.13 | 6.24  | 1.35 | 146 | 213 | 36.3  | 21.5 | 28.2  | 23.5 | 9.1   | 5.75 | 146.2 | 68.3   | 46.1  | 275.4 | 0.26  | 0.14  | 15    | 81  |
| 4.75 | 3.06 | 1.48  | 1.48 | 139 | 291 | 14.3  | 25.2 | 9.2   | 15.3 | 14.5  | 3.97 | 109.5 | 57     | 101.3 | 153.6 | 0.53  | ≤0.1  | ≤10   | 26  |
| 4.21 | 3.53 | 3.09  | 0.45 | 136 | 146 | 17.5  | 30.2 | 27.4  | 21.5 | 7.4   | 5.32 | 135.3 | 67.3   | 63    | 274.3 | 0.53  | 0.21  | 53.2  | 87  |
| 6.46 | 6.43 | 3.6   | 2.35 | 184 | 147 | 21.6  | 28.2 | 74.4  | 35   | 11.2  | 5.25 | 140.7 | 128.8  | 163.5 | 249.4 | 1.26  | 0.19  | 10.3  | 34  |
| 3.93 | 2.94 | 1.73  | 0.93 | 116 | 122 | 11.3  | 28.6 | 11    | 10.3 | 14.5  | 4.02 | 141.5 | 60.5   | 36.2  | 180.8 | 0.72  | <0.1  | >10   | 60  |
| 4.16 | 3.87 | 2.37  | 0.99 | 132 | 142 | 10.5  | 29.3 | 18.2  | 20.3 | 7.8   | 5.23 | 139.4 | 70.2   | 103   | 180.3 | 0.45  | 0.14  | 26.8  | 46  |
| 5.32 | 3.82 | 2.98  | 0.72 | 159 | 209 | 13.5  | 27.5 | 20.5  | 35.3 | 11.4  | 4.25 | 135.3 | 74.2   | 180.3 | 370.4 | 0.01  | 0.13  | 17.5  | 7   |
| 3.88 | 4.83 | 2.21  | 2.27 | 118 | 165 | 10.2  | 24.7 | 21.8  | 25.7 | 6.5   | 3.78 | 143.1 | 54.3   | 46.5  | 178.2 | 0.51  | ≤0.1  | ≤10   | 44  |
| 3.13 | 2.42 | 1.78  | 0.56 | 120 | 89  | 9.2   | 21   | 20.2  | 25.3 | 9.45  | 4.01 | 139.2 | 56     | 102.4 | 198.2 | 0.02  | 0.13  | 53.4  | 99  |
| 5.59 | 6.07 | 4.42  | 1.27 | 172 | 150 | 12.6  | 21.5 | 41.2  | 24.3 | 19.34 | 4.01 | 139   | 67.5   | 28.5  | 180.1 | 0.01  | 0.19  | ≤10   | 47  |
| 4.42 | 5.13 | 4.13  | 1.09 | 135 | 287 | 10.56 | 18.2 | 20.3  | 30   | 15.2  | 4.2  | 145.2 | 48.5   | 30.1  | 213   | 0.67  | ≤0.1  | ≤10   | 53  |
| 3.58 | 3.09 | 1.98  | 1.04 | 123 | 180 | 11.3  | 25.2 | 28.2  | 29.2 | 7.2   | 4.3  | 140.2 | 60.2   | 58.3  | 210.3 | 0.56  | 0.2   | ≤10   | 60  |
| 4.23 | 4.08 | 1.49  | 1.49 | 108 | 128 | 14.4  | 37.2 | 7     | 14   | 6     | 3.67 | 141.6 | 53.7   | 46    | 123   | 0.42  | 0.04  | 26.3  | 45  |
| 4    | 7.54 | 2.18  | 2.18 | 126 | 170 | 14.5  | 29.8 | 21    | 37   | 5.7   | 3.64 | 139.2 | 59.9   | 61    | 249   | 0.45  | 0.051 | 20.67 | 39  |

|      |       |      |      |     |       |      |      |      |      |      |      |       |       |       |       |       |       |        |    |
|------|-------|------|------|-----|-------|------|------|------|------|------|------|-------|-------|-------|-------|-------|-------|--------|----|
| 5.23 | 6.38  | 1.65 | 1.65 | 144 | 114   | 15.8 | 35.1 | 8    | 23   | 8.1  | 3.8  | 138.9 | 76.9  | 43    | 215   | N     | 0.04  | <3     | 8  |
| 4.75 | 5.37  | 1.28 | 1.28 | 102 | 132   | 16.9 | 38.7 | 23   | 48   | 11.6 | 3.98 | 140.9 | 88.5  | 50    | 219   | 0.02  | 0.04  | <3     | 14 |
| 4.21 | 8.52  | 1.09 | 1.09 | 105 | 140   | 15.5 | 45.8 | 12   | 27   | 2.8  | 3.08 | 141.2 | 71.1  | 158   | 296   | 0.05  | 0.132 | 117.77 | 32 |
| 5.21 | 4.09  | 1.74 | 1.74 | 152 | 199   | 15   | 34   | 18   | 27   | 34.3 | 3.73 | 140.1 | 92.7  | 61    | 172   | 0.13  | 0.04  | <3     | 10 |
| 5.25 | 7.79  | 5.87 | 1.32 | 160 | 294   | 13.2 | 28.6 | 25   | 25   | 7.7  | 4.03 | 137.1 | 78.2  | 68    | 165   | 0.05  | 0.04  | 8.8    | 11 |
| 5.02 | 2.36  | 1.36 | 0.83 | 151 | 113   | 12.7 | 33.9 | 20   | 24   | 4.8  | 3.6  | 139.4 | 57    | 42    | 179   | 0.01  | 0.13  | <10    | 13 |
| 4.23 | 4.55  | 2.87 | 1.15 | 138 | 163   | 11   | 25.6 | 47   | 45   | 8.8  | 3.2  | 138.9 | 57    | 56    | 212   | 0.34  | 0     | 10.63  | 2  |
| 4.63 | 3.61  | 2.44 | 0.91 | 137 | 285   | 12.5 | 31   | 33   | 35   | 5.9  | 3.7  | 138.5 | 71    | 38    | 205   | 0.31  | 0     | 15.4   | 43 |
| 4.51 | 3.21  | 1.51 | 1.42 | 129 | 128   | 10.8 | 25.2 | 12.5 | 21.8 | 6.6  | 4    | 144.3 | 46.7  | 33.2  | 179.8 | 0.53  | 0.14  | 13.4   | 44 |
| 4.56 | 5.13  | 3.5  | 1.35 | 138 | 241   | 17.3 | 31.3 | 31.5 | 36.3 | 17.4 | 4.75 | 136.3 | 85.3  | 41    | 245.2 | 0.41  | 0.24  | 23.5   | 21 |
| 4.56 | 3.13  | 2.08 | 0.91 | 137 | 118   | 14.2 | 31.4 | 44.6 | 27.5 | 18.4 | 3.88 | 140.8 | 63.3  | 65.9  | 303.9 | 0.6   | 0.1   | 22     | 14 |
| 5.32 | 3.53  | 2.53 | 0.95 | 153 | 136   | 13.5 | 21.5 | 30.2 | 21.5 | 34.2 | 3.51 | 146.2 | 135.2 | 85.3  | 204.2 | 0.4   | 0.14  | 35.2   | 10 |
| 4.47 | 10.82 | 8.92 | 1.51 | 136 | 319   | 9.2  | 23.2 | 19.6 | 16.1 | 9.24 | 5.56 | 140.8 | 47.9  | 32    | 221.2 | 0.01  | 0.13  | 10.1   | 5  |
| 5.24 | 7.8   | 5.8  | 1.23 | 143 | 154.4 | X    | X    | 23   | 14   | 18.3 | 3.76 | 132.6 | 97    | 797   | 151   | 0.42  | 0.6   | 69.4   | 97 |
| 4.25 | 8.59  | 3.18 | 1.21 | 161 | 319   | 14.9 | 27.6 | 23   | 23   | 7.7  | 3.84 | 138.1 | 103.2 | 101   | 196   | 0.31  | 0.07  | 35.3   | 46 |
| 5.15 | 6.45  | 6.77 | 0.69 | 126 | 93    | 132  | 27.3 | 18   | 42   | 18.3 | 3.52 | 146.1 | 94.2  | 125   | 363   | 0.67  | 0.05  | 28.1   | 37 |
| 3.57 | 5.22  | 8.21 | 0.75 | 156 | 196   | 14.9 | 33   | 40   | 26   | 8.4  | 3.51 | 138   | 202.2 | 45    | 215   | 0.64  | 0.34  | 16.65  | 67 |
| 5.11 | 4.57  | 2.72 | 1.42 | 153 | 259   | 9.7  | 25.8 | 74.4 | 79.3 | 8.6  | 5.77 | 142.4 | 94.5  | 539.6 | 561.6 | 0.8   | 0.11  | 136.3  | 87 |
| 4.23 | 4.98  | 4.23 | 0.73 | 139 | 223   | 13.5 | 36.2 | 29   | 15   | 10.3 | 3.73 | 142.3 | 56.2  | 46    | 159.3 | 0.53  | 0.12  | <10    | 13 |
| 4.23 | 4.15  | 3.13 | 0.71 | 164 | 176   | 13   | 27.9 | 35   | 28   | 6.5  | 4.2  | 142.2 | 77    | 83    | 204   | 0.27  | 0     | <10    | 16 |
| 4.37 | 9.4   | 6.5  | 1.9  | 143 | 104   | 10.8 | 33.3 | 22   | 23   | 12.6 | 3.78 | 138   | 76    | 122   | 225   | 0.004 | 0.23  |        | 13 |
| 3.7  | 5.1   | 3.2  | 1.4  | 120 | 160   | 12.3 | 28.5 | 20   | 16   | 6    | 3.52 | 139   | 50    | 45    | 143   | 0.005 | 0.02  |        | 21 |
| 4.5  | 2.8   | 1.7  | 0.9  | 148 | 99    | 12   | 37.6 | 57   | 63   | 51.3 | 3.64 | 136   | 74    | 219   | 484   | 0.005 | 0.21  |        | 19 |
| 4.6  | 3.1   | 1.9  | 0.8  | 134 | 81    | 12.4 | 32.7 | 18   | 29   | 17.3 | 3.79 | 140   | 88    | 110   | 223   | 0.003 | 0.04  |        | 66 |
| 5.1  | 8     | 6.6  | 1.1  | 149 | 237   | 11.7 | 34.8 | 24   | 21   | 11.7 | 4.63 | 134   | 57    | 22    | 274   | 0.002 | 0.07  |        | 14 |
| 4.1  | 3     | 1.9  | 0.7  | 119 | 144   | 11.7 | 30.8 | 13   | 18   | 6.6  | 3.55 | 141   | 62    | 40    | 196   | 0.001 | 0.04  |        | 28 |
| 4.1  | 1.6   | 1.2  | 0.3  | 126 | 181   | 11.6 | 36.5 | 9    | 15   | 5    | 4.03 | 139   | 49    | 69    | 220   | 0.08  | 0.06  |        | 51 |
| 4.9  | 5.1   | 3.5  | 1.2  | 144 | 187   | 13   | 36.2 | 25   | 23   | 6    | 3.78 | 135   | 89    | 64    | 225   | 0.002 | 0.05  |        | 54 |
| 4.1  | 3.8   | 1.9  | 1.5  | 126 | 159   | 11.5 | 31.3 | 16   | 14   | 6.5  | 4.09 | 143   | 74    | 32    | 167   | 0.001 | 0.02  |        | 17 |
| 4.2  | 5.9   | 3.7  | 1.9  | 123 | 240   | 11.9 | 28.9 | 51   | 38   | 19.8 | 3.3  | 143   | 84    | 64    | 187   | 0.002 | 0.04  |        | 17 |
| 4.5  | 7.8   | 5.6  | 1.6  | 138 | 245   | 11.1 | 34.5 | 52   | 22   | 8.3  | 4.15 | 141   | 64    | 50    | 177   | 0.001 | 0.03  |        | 51 |
| 4.5  | 4.2   | 2.9  | 0.8  | 140 | 226   | 12.6 | 33.9 | 12   | 16   | 5.5  | 4.36 | 137   | 78    | 53    | 215   | 0.001 | 0.03  |        | 18 |
| 5.4  | 9.3   | 6    | 2.3  | 168 | 188   | 11.9 | 30.7 | 30   | 21   | 10   | 3.41 | 142   | 94    | 76    | 143   | 0.003 | 0.08  |        | 23 |
| 4.3  | 4.7   | 4.3  | 0.3  | 124 | 227   | 11.3 | 28.7 | 22   | 19   | 7.1  | 4.54 | 140   | 66    | 69    | 223   | 0.001 | 0.02  |        | 34 |
| 5.5  | 10.1  | 9.1  | 0.7  | 153 | 145   | 11.7 | 27.3 | 21   | 15   | 13.9 | 4    | 142   | 80    | 188   | 283   | 0.003 | 0.03  |        | 13 |
| 3.01 | 9.5   | 8.7  | 0.6  | 93  | 176   | 10.9 | 25.9 | 19   | 17   | 10.5 | 4.32 | 142   | 79    | 27    | 277   | 0.004 | 0.02  |        | 64 |
| 4.5  | 4.6   | 2.6  | 1.6  | 119 | 378   | 11.5 | 29   | 23   | 20   | 5.8  | 4.18 | 143   | 54    | 48    | 171   | 0.001 | 0.03  |        | 28 |
| 3.6  | 6.1   | 4.2  | 1.3  | 107 | 387   | 11.4 | 25.1 | 21   | 14   | 2.5  | 3.86 | 138   | 51    | 13    | 166   | 0.01  | 0.02  |        | 23 |
| 5.6  | 8.7   | 7.9  | 0.5  | 159 | 163   | 11.8 | 33.8 | 14   | 25   | 33.1 | 3.62 | 137   | 107   | 169   | 242   | 0.017 | 0.04  |        | 16 |
| 4.7  | 10.2  | 9.5  | 0.4  | 147 | 347   | 11.4 | 226  | 37   | 25   | 7.9  | 3.74 | 140   | 60    | 266   | 323   | 0.007 | 0.02  |        | 23 |
| 4.8  | 21.2  | 19   | 0.8  | 148 | 195   | 11.9 | 30.8 | 23   | 15   | 8.3  | 4.05 | 143   | 84    | 44    | 358   |       | 0.09  |        | 20 |
| 4.3  | 9.7   | 6.2  | 1.7  | 133 | 226   | 9.8  | 31.3 | 58   | 27   | 4.9  | 4.23 | 142   | 48    | 28    | 301   | 0.001 | 0.04  |        | 16 |
| 4.2  | 10.3  | 8.1  | 1.5  | 130 | 181   | 11.3 | 32.6 | 11   | 19   | 13.2 | 3.45 | 138   | 109   | 169   | 171   | 0.004 | 0.03  |        | 14 |
| 4.9  | 4.6   | 3.4  | 0.9  | 145 | 161   | 11.1 | 32.3 | 66   | 46   | 18.4 | 3.5  | 136   | 71    | 82    | 246   | 0.002 | 0.1   |        | 65 |
| 3.6  | 19.9  | 17.9 | 1.5  | 101 | 141   | 10.4 | 31.9 | 18   | 18   | 5.2  | 4.32 | 140   | 39    | 46    | 198   | 0.002 | 0.04  |        | 34 |
| 4.3  | 13.8  | 12.7 | 0.5  | 142 | 323   | 11.7 | 29.6 | 45   | 16   | 10.7 | 4.17 | 142   | 96    | 70    | 359   | 0.001 | 0.03  |        | 60 |
| 3.9  | 9.4   | 8.8  | 0.5  | 110 | 196   | 12.2 | 24.8 | 26   | 18   | 5.4  | 3.53 | 136   | 51    | 45    | 336   |       | 0.02  |        | 75 |

|      |      |      |     |     |     |      |      |     |     |      |      |     |     |     |     |       |      |  |     |
|------|------|------|-----|-----|-----|------|------|-----|-----|------|------|-----|-----|-----|-----|-------|------|--|-----|
| 5    | 4.3  | 3.1  | 0.8 | 150 | 140 | 11.9 | 43.9 | 18  | 22  | 10.6 | 3.11 | 130 | 91  | 111 | 256 | 0.005 | 0.11 |  | 48  |
| 4.01 | 5.7  | 5.2  | 0.4 | 109 | 204 | 12   | 28.9 | 37  | 53  | 27.8 | 4.53 | 139 | 85  | 70  | 316 | 0.002 | 0.04 |  | 9   |
| 4.6  | 2.1  | 1.8  | 0.2 | 142 | 80  | 11.4 | 37   | 10  | 20  | 10.8 | 4.53 | 137 | 66  | 52  | 246 | 0.005 | 0.02 |  | 40  |
| 3.9  | 10   | 9.3  | 0.3 | 117 | 285 | 10.4 | 23.4 | 17  | 8   | 5.7  | 3.25 | 141 | 53  | 41  | 196 | 0.006 | 0.03 |  | 5   |
| 5.3  | 3.9  | 2    | 1.5 | 137 | 273 | 13.2 | 37.4 | 31  | 30  | 10.1 | 4.34 | 141 | 61  | 66  | 173 | 0     | 0.06 |  | 2   |
| 4    | 6.8  | 4.5  | 1.7 | 129 | 173 | 11.4 | 28.2 | 22  | 14  | 14   | 3.59 | 140 | 55  | 52  | 166 | 0.001 | 0.02 |  | 17  |
| 4.9  | 7.5  | 6.7  | 0.6 | 151 | 252 | 11.5 | 26.9 | 15  | 22  | 9.6  | 4.07 | 141 | 63  | 80  | 367 | 0.003 | 0.02 |  | 49  |
| 2.33 | 4.8  | 3.5  | 0.6 | 71  | 101 | 11.6 | 42.5 | 28  | 25  | 7.6  | 3.97 | 137 | 354 | 340 | 268 | 0.052 | 0.35 |  | 25  |
| 5.2  | 5.7  | 5    | 0.6 | 150 | 191 | 11.5 | 37.1 | 39  | 42  | 29   | 4.04 | 138 | 84  | 448 | 441 | 0.015 | 0.07 |  | 8   |
| 4.73 | 4    | 3    | 0.6 | 137 | 165 | 12.7 | 32.9 | 13  | 16  | 6.8  | 3.55 | 137 | 72  | 44  | 182 | 0.01  | 0.07 |  | 16  |
| 4.8  | 7.6  | 5.3  | 1.6 | 134 | 397 | 10.8 | 27.3 | 110 | 54  | 9.3  | 4.53 | 140 | 73  | 42  | 195 | 0.001 | 0.05 |  | 19  |
| 4.73 | 9.9  | 8.8  | 0.6 | 141 | 167 | 10.1 | 27.6 | 36  | 44  | 6    | 3.13 | 136 | 88  | 180 | 310 | 0.008 | 0.1  |  | 8   |
| 4    | 16.3 | 14.9 | 0.8 | 131 | 232 | 11   | 30.9 | 15  | 11  | 4.1  | 3.88 | 139 | 75  | 65  | 183 | 0.001 | 0.05 |  | 4   |
| 3.5  | 8.8  | 7.8  | 0.5 | 111 | 189 | 11.2 | 26.5 | 9   | 13  | 7.1  | 4.78 | 143 | 117 | 37  | 293 | 0.003 | 0.02 |  | 44  |
| 4.4  | 19   | 17.8 | 0.9 | 131 | 201 | 12.2 | 31.9 | 20  | 14  | 8.8  | 3.94 | 137 | 74  | 38  | 242 | 0.002 | 0.1  |  | 79  |
| 5.2  | 5.7  | 4.3  | 1.1 | 156 | 204 | 12.9 | 34.7 | 75  | 58  | 30.3 | 3.5  | 138 | 68  | 225 | 505 | 0.026 | 0.15 |  | 6   |
| 4.3  | 8.4  | 6.7  | 0.9 | 141 | 138 | 11.5 | 30.9 | 12  | 20  | 13.4 | 3.78 | 140 | 50  | 120 | 215 | 0.005 | 0.02 |  | 23  |
| 4.52 | 5.4  | 4.4  | 0.7 | 129 | 115 | 10.2 | 30.7 | 25  | 30  | 7.9  | 5.01 | 132 | 88  | 197 | 397 | 0.007 | 0.06 |  | 74  |
| 4.5  | 7.6  | 6.5  | 0.4 | 133 | 130 | 11.2 | 29.3 | 45  | 44  | 5.4  | 4.43 | 142 | 70  | 180 | 307 | 0.013 | 0.07 |  | 7   |
| 3.43 | 11.3 | 10.3 | 0.5 | 105 | 81  | 11.7 | 31.6 | 78  | 39  | 8.1  | 3.89 | 139 | 54  | 95  | 229 | 0.002 | 0.22 |  | 14  |
| 5.1  | 14.2 | 13.4 | 0.2 | 155 | 260 | 11.4 | 29.8 | 13  | 12  | 6.8  | 5.12 | 132 | 87  | 77  | 320 | 0.003 | 0.04 |  | 49  |
| 3.6  | 10.1 | 7.8  | 1.9 | 115 | 314 | 10.4 | 20.4 | 24  | 12  | 10.1 | 5.25 | 134 | 60  | 20  | 212 | 0.005 | 0.03 |  | 103 |
| 4.9  | 3.8  | 2.2  | 1.1 | 150 | 194 | 11.8 | 37   | 8   | 17  | 10.4 | 4.03 | 140 | 87  | 48  | 260 | 0.003 | 0.06 |  | 18  |
| 3.3  | 12.4 | 10.3 | 1.4 | 106 | 436 | 10.9 | 30.6 | 25  | 23  | 5.8  | 3.87 | 136 | 39  | 40  | 395 | 0.004 |      |  | 75  |
| 5.7  | 5.2  | 3.4  | 1.1 | 167 | 153 | 12.3 | 39.1 | 42  | 20  | 40.1 | 3.44 | 136 | 127 | 75  | 204 | 0.002 | 0.07 |  | 3   |
| 4    | 9.1  | 7.1  | 1.3 | 115 | 304 | 12.7 | 36.3 | 15  | 18  | 11.9 | 4.33 | 138 | 56  | 37  | 353 | 0.003 | 0.07 |  | 91  |
| 3.7  | 11.8 | 10.5 | 0.9 | 119 | 170 | 12.7 | 29.9 | 17  | 29  | 17.8 | 3.19 | 142 | 63  | 77  | 306 | 0.004 | 0.05 |  | 74  |
| 4.7  | 7.3  | 6.4  | 0.6 | 138 | 225 | 13.3 | 26.5 | 53  | 41  | 17.4 | 3.36 | 142 | 78  | 96  | 337 | 0.004 | 0.14 |  | 20  |
| 3.66 | 7.9  | 7.3  | 0.5 | 109 | 402 | 11.2 | 36   | 32  | 30  | 9.4  | 2.92 | 129 | 49  | 63  | 373 | 0.001 | 0.32 |  | 96  |
| 5.3  | 5.1  | 2.5  | 2   | 169 | 215 | 11.4 | 28.3 | 24  | 18  | 18.3 | 3.61 | 141 | 91  | 48  | 153 | 0.002 | 0.03 |  | 8   |
| 4.65 | 6.5  | 5.9  | 0.4 | 132 | 243 | 12.5 | 28   | 19  | 9   | 10.7 | 3.71 | 143 | 77  | 33  | 228 | 0.003 | 0.01 |  | 27  |
| 4    | 6.6  | 3.7  | 1.5 | 127 | 269 | 13.1 | 29.1 | 100 | 41  | 17.6 | 3.33 | 138 | 51  | 31  | 132 | 0.001 | 0.09 |  | 14  |
| 4.8  | 4.1  | 2.1  | 1.4 | 145 | 170 | 12.1 | 35.4 | 15  | 15  | 16.5 | 3.87 | 138 | 80  | 87  | 211 | 0.02  | 0.05 |  | 72  |
| 4.3  | 3.4  | 1.7  | 1.3 | 133 | 209 | 11.7 | 31   | 13  | 16  | 6    | 3.15 | 142 | 49  | 61  | 193 | 0.002 | 0.04 |  | 10  |
| 3    | 17.2 | 14.9 | 1   | 124 | 233 | 11.6 | 28   | 68  | 38  | 8.5  |      |     | 68  | 31  | 287 | 0.002 | 0.03 |  | 34  |
| 3    | 12.2 | 11.6 | 0.4 | 93  | 563 | 11.5 | 25.6 | 14  | 10  | 12   | 4.14 | 138 | 65  | 22  | 166 | 0.002 | 0.03 |  | 96  |
| 4    | 3    | 1.6  | 1.2 | 122 | 147 | 11.4 | 36.6 | 8   | 16  | 9.6  | 3.45 | 137 | 75  | 58  | 165 | 0.002 | 0.06 |  | 33  |
| 5    | 2.9  | 1.5  | 1.2 | 154 | 126 | 12.4 | 39.9 | 20  | 20  | 10.8 | 4.17 | 137 | 89  | 70  | 241 | 0.001 | 0.05 |  | 9   |
| 3.9  | 7.5  | 6.9  | 0.4 | 115 | 505 | 11   | 28.1 | 27  | 22  | 3.7  | 3.82 | 141 | 74  | 31  | 214 | 0.003 | 0.03 |  | 86  |
| 4.5  | 7    | 6.2  | 0.4 | 134 | 162 | 11.3 | 28.1 | 17  | 12  | 13.9 | 4.34 | 131 | 67  | 22  | 169 | 0.004 |      |  | 25  |
| 4.8  | 11.7 | 10.5 | 0.3 | 133 | 367 | 11.2 | 27.6 | 287 | 111 | 11.4 | 3.98 | 139 | 75  | 33  | 361 | 0.002 | 0.06 |  | 78  |
| 4.3  | 1.7  | 0.9  | 0.7 | 122 | 253 | 11.1 | 32.7 | 8   | 14  | 5.2  | 4.35 | 136 | 35  | 50  | 245 | 0     | 0.02 |  | 55  |
| 5.3  | 4.2  | 2.2  | 1.4 | 156 | 166 | 11.4 | 29.3 | 22  | 20  | 14.9 | 4.14 | 141 | 109 | 91  | 213 | 0.002 | 0.04 |  | 44  |
| 4.7  | 10.5 | 9.2  | 0.6 | 146 | 234 | 10.8 | 26.9 | 124 | 29  | 8.1  | 4.07 | 137 | 45  | 34  | 159 | 0     | 0.02 |  | 42  |
| 3.67 | 2.8  | 2.5  | 0.2 | 112 | 189 | 15.4 | 51.4 | 27  | 41  | 18.7 | 5.38 | 130 | 66  | 178 | 329 | 0.008 | 0.06 |  | 59  |
| 3.5  | 4.2  | 3.1  | 1.2 | 126 | 175 | 10.2 | 33.9 | 39  | 26  | 16.2 | 4.21 | 137 | 75  | 85  | 187 | 0.003 | 0.03 |  | 28  |
| 4.23 | 5.23 | 2.14 | 0.9 | 139 | 164 | 12.4 | 26.8 | 20  | 18  | 16.2 | 3.97 | 142 | 78  | 39  | 165 | 0.008 | 0.06 |  | 26  |

Table S2. The detailed values of oral microbial diversity index and observed OTUs

| sample | reads  | label | ace        | chao       | shannon  | simpson  | coverage | observed_otus |
|--------|--------|-------|------------|------------|----------|----------|----------|---------------|
| CP01   | 27880  | 0.97  | 344.611252 | 313.37037  | 2.561866 | 0.181486 | 0.997561 | 229           |
| CP44   | 7544   | 0.97  | 325.7291   | 314.25     | 3.317562 | 0.082001 | 0.989926 | 243           |
| CP45   | 38617  | 0.97  | 585.017379 | 609.632653 | 3.41768  | 0.094394 | 0.996789 | 454           |
| CP46   | 31642  | 0.97  | 601.078167 | 511.166667 | 2.549721 | 0.260334 | 0.995986 | 363           |
| CP48   | 19696  | 0.97  | 425.569711 | 413.306122 | 3.055393 | 0.169012 | 0.995278 | 326           |
| CP49   | 90016  | 0.97  | 403        | 403        | 3.059276 | 0.118804 | 1        | 403           |
| CP50   | 28485  | 0.97  | 318.67634  | 291.769231 | 2.585928 | 0.148046 | 0.997999 | 169           |
| CP51   | 172772 | 0.97  | 347        | 347        | 2.998595 | 0.130529 | 1        | 347           |
| CP52   | 56632  | 0.97  | 259        | 259        | 3.142361 | 0.091595 | 1        | 259           |
| CP53   | 108876 | 0.97  | 476        | 476        | 3.355053 | 0.070778 | 1        | 476           |
| CP55   | 14594  | 0.97  | 595.984021 | 601.266667 | 3.769353 | 0.077171 | 0.990613 | 446           |
| CP57   | 7843   | 0.97  | 524.874687 | 420.976744 | 3.413037 | 0.07587  | 0.985847 | 279           |
| CP58   | 8837   | 0.97  | 462.616064 | 399.576923 | 1.52969  | 0.551645 | 0.988797 | 213           |
| CP60   | 16660  | 0.97  | 352.933798 | 303.774194 | 2.512708 | 0.171691 | 0.995618 | 219           |
| CP61   | 61730  | 0.97  | 476        | 476        | 3.632293 | 0.060135 | 1        | 476           |
| CP62   | 42534  | 0.97  | 376        | 376        | 3.704655 | 0.048996 | 1        | 376           |
| CP65   | 34625  | 0.97  | 295.914076 | 292.171429 | 1.421591 | 0.370534 | 0.997863 | 215           |
| CP66   | 59690  | 0.97  | 335        | 335        | 2.41537  | 0.235417 | 1        | 335           |
| CP67   | 111884 | 0.97  | 267        | 267        | 3.311838 | 0.065666 | 1        | 267           |
| CP68   | 84088  | 0.97  | 290        | 290        | 2.879879 | 0.120567 | 1        | 290           |
| CP69   | 10808  | 0.97  | 330.894238 | 326.058824 | 2.822478 | 0.179229 | 0.992876 | 240           |
| CP70   | 67321  | 0.97  | 483.016126 | 376.692308 | 2.127284 | 0.300125 | 0.998619 | 267           |
| CP38   | 13929  | 0.97  | 206.648774 | 183.1875   | 2.77571  | 0.160166 | 0.997487 | 146           |
| CP37   | 23414  | 0.97  | 231.528256 | 242.105263 | 3.045968 | 0.098941 | 0.998078 | 190           |
| CP54   | 6995   | 0.97  | 440.705301 | 362.028571 | 2.689706 | 0.169547 | 0.986133 | 229           |
| CP35   | 103978 | 0.97  | 178        | 178        | 2.319593 | 0.156498 | 1        | 178           |
| CP36   | 20585  | 0.97  | 635.861636 | 523.042553 | 3.592884 | 0.072153 | 0.994073 | 366           |
| CP03   | 116888 | 0.97  | 431        | 431        | 3.791821 | 0.051933 | 1        | 431           |
| CP04   | 19175  | 0.97  | 162.113338 | 127.2      | 1.104302 | 0.603845 | 0.998279 | 92            |
| CP05   | 15122  | 0.97  | 391.051128 | 447.8      | 3.437891 | 0.105346 | 0.994379 | 305           |
| CP06   | 115734 | 0.97  | 413        | 413        | 3.439571 | 0.066248 | 1        | 413           |
| CP07   | 6796   | 0.97  | 387.412661 | 379.133333 | 3.393565 | 0.099144 | 0.986168 | 282           |
| CP08   | 99290  | 0.97  | 195        | 195        | 2.551229 | 0.128344 | 1        | 195           |
| CP10   | 9906   | 0.97  | 497.278351 | 431.4      | 3.200432 | 0.095125 | 0.989098 | 303           |
| CP11   | 28852  | 0.97  | 553.462202 | 596        | 3.905855 | 0.04498  | 0.995945 | 422           |
| CP14   | 52168  | 0.97  | 460        | 460        | 3.767754 | 0.060847 | 1        | 460           |
| CP16   | 13566  | 0.97  | 521.639193 | 529.518519 | 3.867469 | 0.05908  | 0.991449 | 406           |
| CP02   | 13110  | 0.97  | 325.778033 | 337.935484 | 2.858169 | 0.172839 | 0.994203 | 246           |
| CP20   | 48012  | 0.97  | 350        | 350        | 3.022175 | 0.133807 | 1        | 350           |
| CP21   | 16015  | 0.97  | 543.529262 | 458.277778 | 2.342115 | 0.205742 | 0.992757 | 273           |
| CP22   | 12601  | 0.97  | 697.38807  | 602.444444 | 4.255485 | 0.035215 | 0.98889  | 448           |
| CP24   | 37136  | 0.97  | 710.08295  | 639        | 3.127458 | 0.112952 | 0.996203 | 404           |
| CP26   | 53996  | 0.97  | 316        | 316        | 3.296875 | 0.09276  | 1        | 316           |
| CP29   | 18150  | 0.97  | 257.319427 | 263.6      | 2.224092 | 0.238    | 0.996915 | 202           |
| CP31   | 14166  | 0.97  | 614.86774  | 521.459016 | 3.86911  | 0.048804 | 0.990823 | 384           |
| CP32   | 6810   | 0.97  | 529.71597  | 478.083333 | 3.596202 | 0.063671 | 0.983113 | 296           |
| CP34   | 32646  | 0.97  | 292.843483 | 279.333333 | 2.061416 | 0.251023 | 0.998162 | 181           |
| CP18   | 17946  | 0.97  | 524.63839  | 524.05     | 3.56953  | 0.082644 | 0.993425 | 409           |
| HC109  | 21480  | 0.97  | 692.209452 | 644.306122 | 3.09088  | 0.115763 | 0.992877 | 407           |
| HC097  | 42128  | 0.97  | 793.818809 | 676.038961 | 3.667519 | 0.060927 | 0.996273 | 517           |
| HC098  | 27077  | 0.97  | 555.35162  | 572.132075 | 2.654441 | 0.191627 | 0.995051 | 404           |
| HC099  | 25347  | 0.97  | 657.092341 | 646.208333 | 3.690999 | 0.065456 | 0.994082 | 491           |
| HC108  | 43590  | 0.97  | 493.915179 | 539.236842 | 3.593571 | 0.057279 | 0.997637 | 401           |
| HC104  | 22999  | 0.97  | 733.967277 | 640.444444 | 3.29171  | 0.111289 | 0.993565 | 439           |
| HC106  | 32968  | 0.97  | 875.975978 | 768.43662  | 3.758322 | 0.07314  | 0.994692 | 554           |
| HC107  | 21724  | 0.97  | 774.695812 | 655.119403 | 4.022666 | 0.036532 | 0.992727 | 470           |

|       |       |      |            |            |          |          |          |     |
|-------|-------|------|------------|------------|----------|----------|----------|-----|
| HC095 | 46027 | 0.97 | 719.148508 | 708.608108 | 3.779676 | 0.051727 | 0.996567 | 541 |
| HC101 | 75060 | 0.97 | 605        | 605        | 3.476822 | 0.076938 | 1        | 605 |
| HC093 | 37151 | 0.97 | 665.095983 | 553.6      | 3.615062 | 0.056075 | 0.996528 | 416 |
| HC087 | 36441 | 0.97 | 588.989065 | 501.357143 | 2.885708 | 0.127263 | 0.996872 | 348 |
| HC091 | 37313 | 0.97 | 948.178257 | 820.568966 | 3.258193 | 0.122278 | 0.994908 | 511 |
| HC090 | 57888 | 0.97 | 723.697811 | 719.544118 | 3.587789 | 0.079642 | 0.997392 | 553 |
| HC089 | 40437 | 0.97 | 664.496384 | 715        | 3.562707 | 0.068609 | 0.996192 | 484 |
| HC086 | 29743 | 0.97 | 565.11103  | 564.803571 | 3.278423 | 0.135329 | 0.995898 | 433 |
| HC085 | 40535 | 0.97 | 728.612948 | 672.245283 | 3.848113 | 0.038992 | 0.996349 | 467 |
| HC084 | 30448 | 0.97 | 700.546851 | 584.559322 | 3.770142 | 0.048118 | 0.995435 | 422 |
| HC083 | 38740 | 0.97 | 687.516307 | 705.444444 | 3.288964 | 0.127865 | 0.995999 | 516 |
| HC082 | 42006 | 0.97 | 289.155339 | 273.833333 | 2.38855  | 0.264299 | 0.998786 | 203 |
| HC081 | 17769 | 0.97 | 739.950194 | 635.54902  | 4.200669 | 0.030668 | 0.991783 | 428 |
| HC092 | 42683 | 0.97 | 800.052264 | 767.192308 | 3.4406   | 0.106479 | 0.996134 | 507 |
| HC110 | 38647 | 0.97 | 395.796259 | 414.794118 | 3.164184 | 0.091055 | 0.997671 | 297 |
| HC147 | 49095 | 0.97 | 615.726984 | 647.166667 | 3.097064 | 0.125529 | 0.997413 | 499 |
| HC115 | 39842 | 0.97 | 763.676944 | 666.671875 | 3.909347 | 0.044209 | 0.99631  | 499 |
| HC080 | 30229 | 0.97 | 643.494079 | 581.636364 | 3.289923 | 0.093933 | 0.995733 | 394 |
| HC146 | 49947 | 0.97 | 464.624629 | 438.344828 | 2.69077  | 0.144981 | 0.998158 | 294 |
| HC145 | 18813 | 0.97 | 715.671571 | 629.944444 | 3.726379 | 0.059531 | 0.992027 | 423 |
| HC144 | 87790 | 0.97 | 593        | 593        | 3.737823 | 0.065932 | 1        | 593 |
| HC143 | 47328 | 0.97 | 537.668178 | 560.489796 | 3.60808  | 0.056014 | 0.997528 | 422 |
| HC142 | 27648 | 0.97 | 726.699378 | 774.967213 | 3.861634 | 0.056794 | 0.993924 | 545 |
| HC141 | 27041 | 0.97 | 480.881901 | 407.219512 | 2.824617 | 0.134195 | 0.99645  | 296 |
| HC139 | 28625 | 0.97 | 458.179782 | 472.170732 | 3.002927 | 0.120364 | 0.996472 | 349 |
| HC138 | 31522 | 0.97 | 787.962186 | 710.611111 | 3.343091 | 0.100455 | 0.994956 | 478 |
| HC137 | 28242 | 0.97 | 717.725418 | 654.5625   | 3.405985 | 0.098131 | 0.994795 | 431 |
| HC112 | 27647 | 0.97 | 579.339064 | 509        | 2.865648 | 0.136652 | 0.995732 | 332 |
| HC136 | 42272 | 0.97 | 657.645689 | 685.781818 | 3.634004 | 0.058056 | 0.996499 | 488 |
| HC133 | 36421 | 0.97 | 610.419444 | 500.958333 | 3.180461 | 0.094276 | 0.996815 | 362 |
| HC131 | 36212 | 0.97 | 667.739003 | 662.318182 | 3.787799 | 0.053668 | 0.995858 | 493 |
| HC130 | 25429 | 0.97 | 681.556942 | 582.078431 | 3.369256 | 0.074432 | 0.994376 | 383 |
| HC126 | 25322 | 0.97 | 713.976024 | 580.508197 | 3.083549 | 0.136575 | 0.994471 | 421 |
| HC125 | 27994 | 0.97 | 611.14907  | 589.692308 | 1.988812 | 0.390123 | 0.995285 | 368 |
| HC123 | 43259 | 0.97 | 614.195885 | 634.660377 | 3.084634 | 0.127325 | 0.996879 | 464 |
| HC121 | 53173 | 0.97 | 611.079606 | 641.25     | 2.773852 | 0.189821 | 0.997311 | 446 |
| HC119 | 75802 | 0.97 | 478        | 478        | 2.792944 | 0.178732 | 1        | 478 |
| HC118 | 18200 | 0.97 | 902.750213 | 800.358974 | 4.127785 | 0.060388 | 0.98967  | 575 |
| HC116 | 36808 | 0.97 | 559.066663 | 532.513889 | 3.354083 | 0.076873 | 0.996686 | 430 |
| HC135 | 48532 | 0.97 | 579.489004 | 564.378788 | 3.574848 | 0.056863 | 0.997548 | 458 |
| HC075 | 37760 | 0.97 | 718.653626 | 700.182927 | 3.996952 | 0.039512 | 0.995789 | 547 |
| HC037 | 26665 | 0.97 | 403.707998 | 419.837838 | 3.34611  | 0.061873 | 0.996362 | 294 |
| HC071 | 33437 | 0.97 | 680.408018 | 699.916667 | 3.429589 | 0.078703 | 0.995364 | 501 |
| HC030 | 46199 | 0.97 | 612.226166 | 615.803279 | 3.53534  | 0.064735 | 0.996948 | 454 |
| HC029 | 37217 | 0.97 | 931.205092 | 830.828947 | 3.814644 | 0.067974 | 0.994975 | 602 |
| HC027 | 19807 | 0.97 | 552.793544 | 543.474576 | 3.738771 | 0.053931 | 0.993639 | 410 |
| HC025 | 33465 | 0.97 | 672.801359 | 617        | 3.281345 | 0.096067 | 0.995936 | 413 |
| HC023 | 28579 | 0.97 | 736.383871 | 617.411765 | 3.346961 | 0.093102 | 0.994961 | 466 |
| HC022 | 28586 | 0.97 | 668.853227 | 581.882353 | 3.797732 | 0.049337 | 0.995487 | 420 |
| HC020 | 35482 | 0.97 | 458.801237 | 450.446809 | 3.259286 | 0.084834 | 0.997153 | 343 |
| HC019 | 33173 | 0.97 | 380.333122 | 390.181818 | 3.333152 | 0.063207 | 0.997438 | 282 |
| HC018 | 38082 | 0.97 | 592.057338 | 596.762712 | 3.773079 | 0.046968 | 0.996639 | 459 |
| HC016 | 26669 | 0.97 | 706.273611 | 628.92     | 3.54968  | 0.062817 | 0.9946   | 423 |
| HC014 | 24878 | 0.97 | 623.722245 | 562        | 3.692692 | 0.050388 | 0.994815 | 370 |
| HC012 | 40096 | 0.97 | 642.356632 | 702.06383  | 3.537998 | 0.06805  | 0.996409 | 483 |
| HC011 | 38474 | 0.97 | 716.364925 | 635.018182 | 3.528041 | 0.077677 | 0.996309 | 453 |
| HC010 | 44122 | 0.97 | 620.195305 | 658.6      | 3.820292 | 0.041401 | 0.996918 | 475 |
| HC009 | 50519 | 0.97 | 510.506218 | 516.269231 | 2.908715 | 0.141328 | 0.997704 | 388 |

|       |        |      |            |            |          |          |          |     |
|-------|--------|------|------------|------------|----------|----------|----------|-----|
| HC008 | 30757  | 0.97 | 683.33879  | 681.411765 | 3.93056  | 0.036741 | 0.994765 | 492 |
| HC006 | 28078  | 0.97 | 725.08746  | 684.12766  | 3.841266 | 0.047048 | 0.994836 | 462 |
| HC005 | 24333  | 0.97 | 592.993284 | 624.269231 | 3.84007  | 0.060796 | 0.994575 | 458 |
| HC004 | 29343  | 0.97 | 585.194138 | 607.622642 | 3.606278 | 0.067757 | 0.995467 | 442 |
| HC002 | 29497  | 0.97 | 644.79917  | 669.105263 | 3.541393 | 0.078121 | 0.994711 | 457 |
| HC001 | 30847  | 0.97 | 815.488463 | 738.015152 | 3.852247 | 0.05323  | 0.994586 | 528 |
| HC031 | 38126  | 0.97 | 609.014722 | 612.15493  | 3.558002 | 0.06817  | 0.996721 | 503 |
| HC033 | 53735  | 0.97 | 666.452038 | 680.017241 | 3.422914 | 0.076748 | 0.997264 | 495 |
| HC034 | 34796  | 0.97 | 516.174314 | 532.615385 | 3.546455 | 0.054183 | 0.996523 | 393 |
| HC035 | 37024  | 0.97 | 878.264846 | 791.904762 | 3.999467 | 0.044495 | 0.9953   | 553 |
| HC069 | 40530  | 0.97 | 664.626066 | 556.0625   | 3.556121 | 0.069639 | 0.996891 | 392 |
| HC067 | 35121  | 0.97 | 595.583917 | 593.842105 | 3.567269 | 0.071609 | 0.996071 | 428 |
| HC066 | 30228  | 0.97 | 577.980817 | 618.0625   | 3.712697 | 0.060337 | 0.995832 | 454 |
| HC063 | 21417  | 0.97 | 942.305792 | 829.684211 | 4.067781 | 0.036911 | 0.991035 | 508 |
| HC060 | 32409  | 0.97 | 824.388665 | 887.515625 | 3.600499 | 0.087604 | 0.994014 | 595 |
| HC059 | 43805  | 0.97 | 464.391013 | 484        | 2.988172 | 0.168987 | 0.997603 | 354 |
| HC058 | 82078  | 0.97 | 381.892335 | 386        | 2.452852 | 0.255639 | 0.999111 | 313 |
| HC055 | 20420  | 0.97 | 745.593163 | 650.258621 | 3.817692 | 0.058651 | 0.992605 | 455 |
| HC053 | 39799  | 0.97 | 660.542593 | 672.640625 | 4.019038 | 0.043197 | 0.996407 | 514 |
| HC052 | 41699  | 0.97 | 650.303259 | 670.416667 | 3.435517 | 0.092349 | 0.996499 | 494 |
| HC074 | 27274  | 0.97 | 832.319876 | 732.015873 | 3.715803 | 0.063032 | 0.993767 | 504 |
| HC049 | 17018  | 0.97 | 607.27938  | 594.014286 | 3.758876 | 0.060084 | 0.991656 | 451 |
| HC047 | 24269  | 0.97 | 655.678186 | 562.571429 | 3.076738 | 0.147675 | 0.994437 | 419 |
| HC045 | 54578  | 0.97 | 557.882362 | 534.590909 | 3.252364 | 0.105627 | 0.997911 | 437 |
| HC044 | 33703  | 0.97 | 461.408951 | 479.775    | 3.558135 | 0.054234 | 0.996974 | 351 |
| HC043 | 30354  | 0.97 | 557.138167 | 563.175439 | 3.564723 | 0.087955 | 0.99608  | 440 |
| HC042 | 48300  | 0.97 | 476.788066 | 464.212766 | 3.40028  | 0.07125  | 0.99795  | 361 |
| HC041 | 31918  | 0.97 | 603.430175 | 615.125    | 3.335444 | 0.131293 | 0.995802 | 456 |
| HC040 | 53178  | 0.97 | 591.968456 | 562.763158 | 2.57156  | 0.175383 | 0.997762 | 378 |
| HC039 | 30209  | 0.97 | 772.36836  | 667.833333 | 3.993677 | 0.039183 | 0.994869 | 487 |
| HC038 | 132314 | 0.97 | 884        | 884        | 3.938258 | 0.050039 | 1        | 884 |
| HC148 | 33672  | 0.97 | 382.017085 | 371.375    | 2.684673 | 0.129335 | 0.997446 | 280 |
| HC048 | 80130  | 0.97 | 405        | 405        | 3.19075  | 0.086833 | 1        | 405 |
| HC150 | 72542  | 0.97 | 646        | 646        | 3.320047 | 0.102328 | 1        | 646 |

Table S3 .The abundance and composition at the genus level of each sample

| ID                                  | CP04     | CP34     | CP66     | CP69     | CP70     | CP02     | CP49     | CP60     | CP45     | CP32     | CP55     | CP50     | CP20     |
|-------------------------------------|----------|----------|----------|----------|----------|----------|----------|----------|----------|----------|----------|----------|----------|
| Prevotella                          | 0.892057 | 0.885926 | 0.816444 | 0.659587 | 0.655509 | 0.627952 | 0.548276 | 0.52266  | 0.379497 | 0.337234 | 0.332775 | 0.311115 | 0.309465 |
| Neisseria                           | 7.81E-04 | 5.39E-04 | 8.35E-04 | 0.001118 | 7.00E-04 | 0.00171  | 8.06E-04 | 0.001236 | 0.023345 | 0.401492 | 0.071982 | 5.88E-04 | 0.011349 |
| Veillonella                         | 0.00122  | 0.013788 | 0.032145 | 0.208018 | 0.03354  | 0.112395 | 0.167541 | 0.371057 | 0.098529 | 0.036476 | 0.163971 | 0.267219 | 0.119062 |
| Streptococcus                       | 6.29E-04 | 0.00172  | 0.008589 | 0.002142 | 0.010917 | 0.004345 | 0.016051 | 0.043683 | 0.097359 | 0.0037   | 0.163687 | 0.020286 | 0.069814 |
| Porphyromonas                       | 1.95E-04 | 2.30E-05 | 6.25E-04 | 2.90E-04 | 5.87E-04 | 4.09E-04 | 0.004675 | 0        | 0.003992 | 0.002934 | 0.021902 | 0        | 0.001597 |
| Rothia                              | 0        | 8.84E-04 | 0.004474 | 0.001643 | 0.001086 | 0.097875 | 0.010554 | 0.01927  | 0.001221 | 0.004185 | 0.009558 | 0.028225 | 0.003047 |
| Actinomyces                         | 1.94E-04 | 0.083305 | 0.083484 | 0.043543 | 8.27E-04 | 0.014985 | 0.087575 | 0.00448  | 0.003848 | 0.011395 | 0.052849 | 0.263735 | 0.004023 |
| Fusobacterium                       | 3.02E-04 | 0        | 2.82E-04 | 0.004698 | 0.001055 | 0.001346 | 1.64E-04 | 3.15E-04 | 0.01784  | 0.004494 | 0.028657 | 3.70E-05 | 0.010147 |
| Leptotrichia                        | 0.08295  | 2.84E-04 | 8.56E-04 | 0.013142 | 0.197883 | 0.006241 | 0.028998 | 8.15E-04 | 0.205506 | 0.134714 | 0.027743 | 0.00283  | 0.36226  |
| Haemophilus                         | 1.03E-04 | 4.90E-05 | 2.19E-04 | 2.93E-04 | 1.50E-05 | 0        | 0.007501 | 1.78E-04 | 0.001124 | 0.001242 | 0.012547 | 3.10E-05 | 8.97E-04 |
| Granulicatella                      | 0        | 2.54E-04 | 8.21E-04 | 0        | 2.70E-05 | 0.003645 | 8.46E-04 | 0.001064 | 0.003318 | 0.001541 | 0.001769 | 0.054301 | 9.83E-04 |
| Halomonas                           | 0        | 0        | 1.05E-04 | 0        | 0.005042 | 0        | 0.001649 | 7.00E-05 | 1.82E-04 | 1.48E-04 | 5.60E-05 | 0.002152 | 0        |
| Peptostreptococcus                  | 0.019811 | 9.40E-05 | 4.04E-04 | 0.001804 | 0.043192 | 8.95E-04 | 0.002297 | 5.10E-05 | 0.018894 | 0.001076 | 0.002025 | 3.10E-05 | 3.59E-04 |
| Bacteria_unclassified               | 2.03E-04 | 0.001509 | 0.003092 | 0.006982 | 3.43E-04 | 0.004453 | 0.00149  | 0.003676 | 0.005597 | 0.007417 | 0.019284 | 0.008266 | 0.001486 |
| Lachnoanaerobaculum                 | 4.70E-05 | 2.44E-04 | 0.001163 | 0        | 7.69E-04 | 0.09319  | 0.025087 | 3.08E-04 | 0.046832 | 0.006797 | 0.020567 | 4.40E-05 | 0.032084 |
| Candidate_division_TM7_norank       | 0        | 2.84E-04 | 0.006132 | 2.82E-04 | 1.45E-04 | 6.30E-05 | 0.017396 | 0        | 0.002799 | 4.69E-04 | 0.003792 | 0        | 0.010213 |
| Family_XIII_incertae_sedis          | 0        | 0.001489 | 0.002473 | 0.011325 | 5.50E-05 | 0.005068 | 0.004113 | 0.002202 | 0.008603 | 0.002957 | 0.003108 | 3.40E-05 | 0.001438 |
| Oribacterium                        | 1.68E-04 | 0        | 3.70E-05 | 1.75E-04 | 7.60E-05 | 0.005997 | 3.00E-04 | 6.20E-05 | 0.005939 | 0.005636 | 0.003286 | 2.90E-05 | 0.006153 |
| Gemella                             | 2.15E-04 | 0        | 0        | 3.10E-04 | 0.003608 | 0        | 9.21E-04 | 3.43E-04 | 0.003043 | 1.55E-04 | 0.001369 | 0.002102 | 0.001258 |
| Solobacterium                       | 5.60E-05 | 0        | 2.60E-04 | 0.002009 | 1.60E-05 | 3.12E-04 | 0.001436 | 0        | 0.006633 | 0.001401 | 0.010504 | 7.75E-04 | 0.001851 |
| Actinobacteria_unclassified         | 0        | 0.001096 | 0.003005 | 0.001284 | 0        | 0.007061 | 0.001252 | 0.001922 | 1.62E-04 | 0.001102 | 0.002042 | 0.007387 | 4.50E-05 |
| Citrobacter                         | 0        | 0        | 0        | 0        | 0        | 0        | 2.30E-05 | 0        | 0        | 0        | 0        | 0        | 0        |
| Stomatobaculum                      | 4.80E-05 | 0        | 0.001159 | 0        | 1.51E-04 | 0        | 1.06E-04 | 0        | 0.009452 | 0.002007 | 0.005631 | 0        | 0.003995 |
| Capnocytophaga                      | 0        | 3.30E-05 | 9.01E-04 | 0.001349 | 5.92E-04 | 0        | 0.005028 | 3.08E-04 | 9.30E-05 | 0        | 5.25E-04 | 0        | 3.36E-04 |
| Alloprevotella                      | 4.50E-05 | 0.002257 | 0.006431 | 3.86E-04 | 0.014282 | 0.001903 | 0.014615 | 2.55E-04 | 0.002824 | 0.00747  | 0.007238 | 3.90E-05 | 0.005187 |
| Atopobium                           | 6.18E-04 | 0.001835 | 0.008833 | 0.001827 | 0.009358 | 0.001029 | 0.009306 | 0.003943 | 6.41E-04 | 2.92E-04 | 0.001187 | 0.013499 | 4.70E-05 |
| Candidate_division_SR1_norank       | 0        | 0        | 0        | 9.20E-05 | 0        | 0        | 0.001538 | 0        | 0        | 0        | 1.92E-04 | 0        | 1.82E-04 |
| Megasphaera                         | 5.20E-05 | 0.003629 | 0.009513 | 0.032441 | 0        | 0.004247 | 0.028386 | 0.015364 | 1.06E-04 | 0.002276 | 0.010441 | 1.51E-04 | 0.001884 |
| Corynebacterium                     | 0        | 5.30E-05 | 0.003296 | 0        | 0        | 0        | 0        | 0        | 0        | 0        | 4.76E-04 | 0        | 0.001707 |
| Lactobacillales_unclassified        | 0        | 0        | 0        | 0        | 1.20E-05 | 6.28E-04 | 0        | 9.63E-04 | 0.001355 | 6.15E-04 | 0.006521 | 0.002112 | 1.01E-04 |
| Pasteurellaceae_unclassified        | 0        | 0        | 0        | 0        | 0        | 0        | 9.70E-05 | 0        | 2.03E-04 | 0.001074 | 0.001797 | 0        | 0        |
| Firmicutes_unclassified             | 0        | 5.80E-05 | 2.53E-04 | 0.001388 | 1.20E-05 | 0.002291 | 2.41E-04 | 0.002009 | 0.003702 | 7.89E-04 | 0.001531 | 0.00644  | 5.38E-04 |
| Parvimonas                          | 0        | 0        | 0        | 0        | 1.10E-05 | 0        | 2.00E-05 | 0        | 0.001957 | 1.45E-04 | 7.00E-04 | 0        | 9.20E-05 |
| Selenomonas                         | 0        | 2.90E-05 | 9.08E-04 | 7.65E-04 | 2.39E-04 | 3.12E-04 | 8.80E-05 | 0.001593 | 0.023043 | 0.006664 | 0        | 0        | 0.007418 |
| Pelagibacterium                     | 0        | 0        | 0        | 0        | 5.79E-04 | 0        | 8.50E-05 | 6.20E-05 | 0        | 0        | 0        | 3.36E-04 | 0        |
| Campylobacter                       | 4.80E-05 | 1.06E-04 | 5.53E-04 | 8.90E-05 | 0.003359 | 1.56E-04 | 0.002096 | 4.35E-04 | 3.60E-05 | 9.12E-04 | 0        | 3.97E-04 | 0.007537 |
| Xanthomonadaceae_uncultured         | 0        | 0        | 0        | 0        | 4.56E-04 | 0        | 1.24E-04 | 0        | 0        | 0        | 0        | 9.30E-05 | 0        |
| Tannerella                          | 1.02E-04 | 0        | 6.60E-05 | 0.001204 | 0.009274 | 0        | 0.002346 | 0        | 0        | 0        | 0.001616 | 0        | 8.51E-04 |
| Lachnospiraceae_uncultured          | 5.10E-05 | 0        | 4.10E-05 | 0        | 1.50E-05 | 0        | 1.00E-05 | 0        | 0.014305 | 0.006978 | 1.40E-04 | 0        | 0.007802 |
| Enterobacteriaceae_unclassified     | 0        | 0        | 0        | 0        | 0        | 0        | 0        | 0        | 0        | 0        | 0        | 0        | 0        |
| Phyllobacteriaceae_unclassified     | 0        | 0        | 0        | 0        | 4.18E-04 | 0        | 4.80E-05 | 0        | 0        | 0        | 0        | 1.92E-04 | 0        |
| ASCC02_norank                       | 0        | 0        | 0        | 1.88E-04 | 0        | 3.31E-04 | 0        | 0        | 6.81E-04 | 0        | 0.001269 | 0        | 0        |
| Family_XIII_uncultured              | 0        | 0        | 0        | 0        | 0        | 0        | 0        | 0        | 0.001221 | 0        | 1.50E-04 | 0        | 0        |
| Lactobacillus                       | 0        | 0        | 3.30E-05 | 0        | 0        | 0        | 3.90E-05 | 0        | 0        | 0        | 0        | 0        | 0        |
| Peptostreptococaceae_incertae_sedis | 0        | 0        | 0        | 8.40E-05 | 0        | 0        | 6.60E-05 | 0        | 1.26E-04 | 0        | 0        | 0        | 0        |
| Kingella                            | 0        | 0        | 0        | 0        | 0        | 0        | 0        | 3.07E-04 | 0        | 0        | 2.75E-04 | 0        | 0        |
| Olsenella                           | 0        | 0        | 0        | 0        | 0        | 0        | 7.90E-05 | 1.17E-04 | 0        | 0        | 0        | 0        | 0        |
| Others                              | 1.05E-04 | 5.12E-04 | 0.002568 | 0.001542 | 0.00585  | 0.001161 | 0.006731 | 0.001252 | 0.005992 | 0.004213 | 0.006838 | 0.007554 | 0.014792 |

| CP31     | CP03     | CP57     | CP36     | CP14     | CP11     | CP53     | CP62     | CP16     | CP48     | CP26     | CP35     | CP52     | CP67     | CP37     |
|----------|----------|----------|----------|----------|----------|----------|----------|----------|----------|----------|----------|----------|----------|----------|
| 0.304562 | 0.242617 | 0.235205 | 0.21989  | 0.196222 | 0.179796 | 0.15163  | 0.144147 | 0.133947 | 0.102244 | 0.100975 | 0.097505 | 0.095537 | 0.093539 | 0.088567 |
| 0.078917 | 0.001345 | 0.455669 | 0.002041 | 0.083542 | 0.117884 | 0.369481 | 0.223699 | 0.183823 | 0.136002 | 0.213942 | 7.70E-04 | 0.00576  | 0.093677 | 1.68E-04 |
| 0.171327 | 0.314952 | 0.163213 | 0.292121 | 0.097349 | 0.128703 | 0.067691 | 0.092762 | 0.245463 | 0.073911 | 0.312711 | 0.55116  | 0.102682 | 0.266625 | 0.149849 |
| 0.033613 | 0.072585 | 0.009696 | 0.031354 | 0.079971 | 0.078102 | 0.027315 | 0.052189 | 0.020344 | 0.007192 | 0.15507  | 0.007003 | 0.107243 | 0.095437 | 0.397236 |
| 0.001703 | 4.96E-04 | 0.001563 | 3.06E-04 | 0.012573 | 0.024353 | 0.1132   | 0.050125 | 0.001262 | 0.001274 | 0.004601 | 0.174248 | 0.00431  | 0.071719 | 0        |
| 0.003173 | 0.016299 | 0.01685  | 0.001071 | 0.007882 | 0.213142 | 0.046292 | 0.093919 | 0.018785 | 0.00856  | 0.062608 | 0.017316 | 0.028696 | 0.089659 | 0.179814 |
| 0.027122 | 0.052321 | 0.054504 | 0.250436 | 0.088487 | 0.050703 | 7.37E-04 | 0.013251 | 0.057396 | 0.084524 | 0.028078 | 0.046101 | 6.83E-04 | 0.002731 | 0.001241 |
| 0.002517 | 5.40E-04 | 0.009532 | 0.005786 | 0.185727 | 0.01804  | 0.087042 | 0.036536 | 0.025961 | 0.003666 | 8.54E-04 | 3.52E-04 | 0.029441 | 0.021119 | 0        |
| 0.314823 | 0.098673 | 0.011385 | 0.090818 | 0.035787 | 0.014208 | 0.023022 | 0.101082 | 0.221662 | 0.530627 | 0.007459 | 2.32E-04 | 0.492822 | 0.027242 | 0.001935 |
| 7.59E-04 | 3.73E-04 | 9.09E-04 | 0.001032 | 0.001239 | 0.00665  | 0.011306 | 0.005314 | 6.58E-04 | 6.12E-04 | 0.00228  | 2.42E-04 | 0.001136 | 0.01131  | 0.033597 |
| 9.06E-04 | 0.052747 | 1.44E-04 | 0.002543 | 0.007003 | 0.006186 | 0.0046   | 0.01992  | 0.001309 | 0.004    | 0.025336 | 1.74E-04 | 0.027161 | 0.099723 | 0.017418 |
| 0        | 0.002583 | 0        | 2.40E-04 | 0        | 2.23E-04 | 1.00E-05 | 5.10E-05 | 0        | 2.18E-04 | 0        | 0.006913 | 0        | 0.023157 | 5.30E-04 |
| 5.71E-04 | 7.61E-04 | 0.001544 | 0.005397 | 0.001172 | 0.015538 | 0.00462  | 0.004511 | 6.88E-04 | 8.57E-04 | 0.00665  | 0        | 0.002679 | 0.003737 | 0.012557 |
| 0.007648 | 0.003749 | 0.007635 | 0.011067 | 0.009297 | 0.012377 | 0.006723 | 0.003415 | 0.012017 | 0.006209 | 0.004155 | 0.001108 | 4.83E-04 | 0        | 0.003251 |
| 0.010797 | 0.010342 | 0.002935 | 0.007218 | 0.022779 | 0.017935 | 0.015809 | 0.018019 | 0.009939 | 9.71E-04 | 0.011239 | 8.70E-05 | 0.023742 | 0.001402 | 0.001858 |
| 7.50E-05 | 0.011728 | 0.001315 | 0.001286 | 0.024402 | 0.001491 | 0.011745 | 0.055862 | 0.01319  | 9.17E-04 | 0.007397 | 1.21E-04 | 0.026392 | 1.01E-04 | 0        |
| 0.003334 | 8.20E-05 | 7.85E-04 | 0.006193 | 0.001142 | 0.00146  | 0.002515 | 0.002506 | 0.003972 | 0.001564 | 0.005852 | 1.20E-05 | 0.001171 | 6.30E-05 | 0        |
| 0.002742 | 0.027568 | 0.004329 | 0.014331 | 0.015504 | 0.005588 | 0.004755 | 0.007864 | 0.004498 | 0.001498 | 0.019356 | 2.20E-05 | 0.005167 | 1.20E-04 | 2.47E-04 |
| 5.99E-04 | 0.004076 | 0        | 0.003727 | 0.004039 | 0.009519 | 7.38E-04 | 0.001479 | 3.97E-04 | 0.001004 | 0.002954 | 1.75E-04 | 0.002851 | 5.28E-04 | 0.074741 |
| 6.50E-04 | 0.001024 | 0.002516 | 0.006358 | 0.024054 | 0.025661 | 0.002248 | 0.006744 | 0.00303  | 0.001064 | 0.007117 | 4.30E-05 | 0.003036 | 0.007025 | 0.001261 |
| 8.62E-04 | 0.001149 | 0.00592  | 9.27E-04 | 0.006763 | 0.011855 | 2.97E-04 | 0.001656 | 0.00371  | 0.002873 | 0.001761 | 3.50E-04 | 1.15E-04 | 0        | 7.21E-04 |
| 0        | 0        | 0        | 0        | 0        | 0        | 0        | 0        | 0        | 0        | 0        | 0        | 0        | 3.10E-05 | 0        |
| 0.002558 | 0.02231  | 2.55E-04 | 0.002942 | 0.001278 | 0.040433 | 0.004428 | 0.003532 | 0.003339 | 0.001037 | 0.004395 | 0        | 0.007386 | 6.77E-04 | 0.002761 |
| 2.26E-04 | 9.21E-04 | 2.51E-04 | 1.16E-04 | 0.045718 | 3.81E-04 | 0.007043 | 0.002679 | 3.72E-04 | 0        | 1.26E-04 | 4.90E-05 | 9.90E-05 | 0.004509 | 0        |
| 2.08E-04 | 0.007608 | 6.38E-04 | 2.03E-04 | 0.002444 | 2.62E-04 | 0.010704 | 0.001324 | 0.003097 | 1.05E-04 | 0.001318 | 7.80E-05 | 1.86E-04 | 0.002879 | 0        |
| 3.42E-04 | 0.015187 | 4.99E-04 | 0.007337 | 1.44E-04 | 0.001682 | 1.49E-04 | 0.003815 | 0.001004 | 2.23E-04 | 0.001025 | 0        | 1.56E-04 | 0.002397 | 4.21E-04 |
| 7.30E-05 | 2.30E-05 | 5.24E-04 | 0        | 0.006086 | 0        | 0.001255 | 0.001525 | 0        | 0        | 0        | 0        | 0        | 0        | 0        |
| 0.007125 | 0.019817 | 0.007848 | 0.010354 | 0.003289 | 1.06E-04 | 0.001291 | 0.005503 | 0.010678 | 0.001346 | 0.00305  | 0.002816 | 0.017088 | 0.006575 | 9.14E-04 |
| 0        | 0        | 0        | 0        | 0.009822 | 0        | 2.30E-05 | 1.37E-04 | 0        | 0        | 5.30E-05 | 0        | 0        | 0.001235 | 0        |
| 6.00E-04 | 9.47E-04 | 1.30E-04 | 6.98E-04 | 5.93E-04 | 0.001819 | 2.59E-04 | 7.54E-04 | 5.55E-04 | 6.23E-04 | 9.81E-04 | 0        | 1.25E-04 | 0        | 0.01151  |
| 9.02E-04 | 0        | 9.32E-04 | 3.22E-04 | 4.40E-05 | 6.87E-04 | 7.47E-04 | 4.90E-05 | 6.32E-04 | 5.22E-04 | 4.70E-05 | 0        | 0        | 0        | 7.45E-04 |
| 0.00139  | 0.004407 | 5.06E-04 | 0.001728 | 3.46E-04 | 0.003278 | 2.76E-04 | 0.001034 | 0.001197 | 0.001007 | 0.001806 | 0        | 1.27E-04 | 2.80E-05 | 0.003796 |
| 0        | 0        | 0        | 1.42E-04 | 5.30E-04 | 0        | 0.003736 | 1.55E-04 | 0        | 0        | 0        | 0        | 3.47E-04 | 0        | 0        |
| 0.00982  | 0.001056 | 0.001206 | 0.012326 | 1.07E-04 | 2.42E-04 | 0        | 0.005309 | 0.006168 | 0.015058 | 3.10E-04 | 3.32E-04 | 3.85E-04 | 0.003757 | 1.93E-04 |
| 0        | 1.79E-04 | 0        | 1.16E-04 | 0        | 0        | 0        | 0        | 0        | 4.10E-05 | 0        | 6.23E-04 | 0        | 0.001131 | 8.20E-05 |
| 8.18E-04 | 0.002681 | 0        | 7.77E-04 | 0.001097 | 4.70E-05 | 9.10E-05 | 4.64E-04 | 1.65E-04 | 8.20E-04 | 3.77E-04 | 0.05884  | 3.20E-05 | 0.039162 | 0.003634 |
| 6.50E-05 | 1.24E-04 | 0        | 1.46E-04 | 0        | 6.80E-05 | 0        | 0        | 0        | 0        | 0        | 4.21E-04 | 0        | 0.001068 | 0        |
| 0.002192 | 1.50E-05 | 0        | 0        | 0.00176  | 0        | 0.004512 | 0.002644 | 3.85E-04 | 0        | 3.20E-05 | 5.20E-05 | 0        | 1.60E-05 | 0        |
| 0.003739 | 0        | 0        | 0.001045 | 0        | 0.005765 | 3.60E-05 | 0.021811 | 0        | 5.73E-04 | 1.19E-04 | 0        | 0.002412 | 0        | 4.10E-05 |
| 0        | 0        | 0        | 0        | 0        | 0        | 0        | 0        | 0        | 0        | 0        | 0        | 0        | 6.20E-05 | 0        |
| 0        | 1.18E-04 | 0        | 0        | 0        | 9.20E-05 | 0        | 0        | 0        | 1.54E-04 | 0        | 3.34E-04 | 0        | 9.16E-04 | 0        |
| 1.50E-04 | 0        | 0        | 3.90E-05 | 7.69E-04 | 6.83E-04 | 3.08E-04 | 2.47E-04 | 9.40E-04 | 1.68E-04 | 0        | 0        | 3.70E-05 | 0        | 0        |
| 6.60E-05 | 0        | 0        | 1.81E-04 | 1.21E-04 | 0        | 2.27E-04 | 2.44E-04 | 6.11E-04 | 9.90E-05 | 4.51E-04 | 1.60E-05 | 0        | 0        | 0        |
| 0        | 0        | 0        | 0        | 0        | 0        | 0        | 0        | 0        | 1.53E-04 | 0        | 1.50E-05 | 7.40E-05 | 0        | 0.001753 |
| 0        | 0        | 0        | 0        | 1.83E-04 | 0        | 1.03E-04 | 4.20E-05 | 6.60E-05 | 0        | 0        | 0        | 0        | 9.83E-04 | 0        |
| 0        | 3.10E-05 | 0        | 0        | 0        | 0        | 0        | 0        | 0        | 1.47E-04 | 0        | 0.028946 | 0        | 2.14E-04 | 0        |
| 0        | 9.10E-05 | 0        | 0        | 0        | 0        | 0        | 0        | 0        | 0        | 0        | 0        | 0        | 9.90E-05 | 0        |
| 0.003026 | 0.008475 | 0.001562 | 0.007386 | 0.020735 | 0.005041 | 0.013036 | 0.013681 | 0.00874  | 0.008137 | 0.005515 | 0.003544 | 0.010439 | 0.025347 | 0.009159 |

| CP68     | CP44     | CP10     | CP51     | CP29     | CP05     | CP61     | CP46     | CP06     | CP01     | CP22     | CP07     | CP38     | CP24     | CP54     |
|----------|----------|----------|----------|----------|----------|----------|----------|----------|----------|----------|----------|----------|----------|----------|
| 0.08177  | 0.068584 | 0.055215 | 0.051884 | 0.041293 | 0.040316 | 0.036386 | 0.032784 | 0.028952 | 0.025097 | 0.023447 | 0.021145 | 0.012993 | 0.012142 | 0.012032 |
| 2.79E-04 | 0.440097 | 0.639783 | 0.335767 | 3.25E-04 | 0.120903 | 0.260348 | 0.059554 | 0.105766 | 5.67E-04 | 0.074769 | 0.004933 | 4.76E-04 | 0.014561 | 0.811705 |
| 0.132732 | 0.080676 | 0.023298 | 0.073535 | 0.505265 | 0.038468 | 0.04059  | 0.09404  | 0.147782 | 0.015783 | 0.098506 | 0.318599 | 0.132785 | 0.021683 | 0.02557  |
| 0.261802 | 0.015303 | 0.013425 | 0.047335 | 0.018797 | 0.064719 | 0.047484 | 0.010766 | 0.133903 | 0.128259 | 0.127869 | 0.098595 | 0.023399 | 0.337252 | 0.020616 |
| 0.00423  | 0.006595 | 0.073711 | 0.038134 | 0.37744  | 0.364896 | 0.154085 | 1.09E-04 | 0.005103 | 5.98E-04 | 0.135881 | 5.87E-04 | 0.078481 | 0.068515 | 0.0062   |
| 0.299367 | 0.057224 | 0.007014 | 0.03382  | 0.015015 | 0.128552 | 0.031562 | 0.011473 | 0.045056 | 0.638111 | 0.139196 | 0.011701 | 0.43505  | 0.272078 | 0.010367 |
| 0.044518 | 0.002102 | 0.002667 | 0.013785 | 6.30E-05 | 0.03139  | 0.001358 | 0.101937 | 0.060328 | 0.080471 | 0.055525 | 0.06099  | 0.132385 | 0.081356 | 0.009876 |
| 2.94E-04 | 0.172051 | 0.087325 | 0.069901 | 0        | 0        | 0.138429 | 0.00401  | 0.00136  | 6.50E-05 | 0.065734 | 0.248711 | 7.80E-05 | 0.007572 | 0.006203 |
| 0.001376 | 0.060363 | 0.008332 | 0.150029 | 0.003218 | 0.095395 | 0.062168 | 0.634796 | 0.157392 | 0.00779  | 0.009838 | 0.112912 | 0        | 0.006109 | 0.026342 |
| 0.002328 | 1.43E-04 | 0.021979 | 0.048283 | 0.002106 | 0.011464 | 0.021083 | 0.011217 | 0.093014 | 5.53E-04 | 0.010005 | 5.89E-04 | 0        | 0.012728 | 0.015113 |
| 0.00974  | 0.005647 | 0.001953 | 0.028249 | 2.53E-04 | 0.005185 | 0.020444 | 0.006814 | 0.118912 | 0.008632 | 0.038702 | 0.007882 | 0.072156 | 0.065671 | 5.94E-04 |
| 0.003241 | 0        | 0        | 0.020054 | 0        | 3.49E-04 | 2.90E-05 | 2.45E-04 | 0.004434 | 4.86E-04 | 7.90E-05 | 0        | 6.20E-05 | 0.001411 | 0        |
| 0.014384 | 0.008477 | 0.003865 | 0.002911 | 6.74E-04 | 0.027098 | 0.014501 | 2.22E-04 | 0.008175 | 0.003766 | 0.018809 | 0.001721 | 0        | 0.002835 | 0        |
| 0.00163  | 0.009023 | 0.021641 | 3.20E-05 | 0.018471 | 0.021073 | 0.006315 | 0.00451  | 0.008278 | 0.01441  | 0.0229   | 0.036618 | 0.02269  | 0.009572 | 0.012001 |
| 7.40E-05 | 0.018477 | 0.00764  | 0.010721 | 0.001651 | 0.010026 | 0.010237 | 0.005317 | 0.010073 | 9.62E-04 | 0.018124 | 0.010726 | 7.70E-05 | 0.002247 | 0.010328 |
| 0.012207 | 1.36E-04 | 0        | 0.006808 | 0        | 0        | 0.008112 | 7.84E-04 | 3.75E-04 | 3.90E-05 | 0.006894 | 0        | 0        | 0.015625 | 0.003259 |
| 2.19E-04 | 0.003732 | 0.001544 | 0.001693 | 0        | 6.31E-04 | 0.004175 | 3.77E-04 | 0.002447 | 0.003361 | 0.005905 | 0.006005 | 0        | 0.001039 | 4.43E-04 |
| 2.29E-04 | 0.006432 | 0.002887 | 0.001108 | 0        | 0        | 0.018733 | 6.76E-04 | 0.016731 | 6.20E-05 | 0.010726 | 2.80E-04 | 6.90E-05 | 0.003684 | 7.52E-04 |
| 0.001514 | 0.001828 | 2.08E-04 | 0.012178 | 0        | 6.10E-05 | 0.00592  | 0.002726 | 5.07E-04 | 3.20E-05 | 0.032329 | 7.58E-04 | 0        | 0.02519  | 0        |
| 0.001528 | 2.60E-04 | 1.11E-04 | 0.007409 | 0.00177  | 0.002695 | 0.002101 | 0.001674 | 0.0017   | 2.16E-04 | 0.002007 | 2.76E-04 | 2.23E-04 | 0.002156 | 3.04E-04 |
| 0.002291 | 0.001178 | 0.001233 | 0        | 0        | 0.017012 | 8.90E-05 | 0.002313 | 0.002194 | 0.062813 | 0.014631 | 0.005656 | 0.063322 | 0.007176 | 0.001786 |
| 0        | 0        | 0        | 2.03E-04 | 0        | 0        | 0        | 0        | 1.00E-05 | 0        | 0        | 0        | 0        | 0        | 0        |
| 0        | 0.012995 | 0.003426 | 4.94E-04 | 1.02E-04 | 7.30E-05 | 0.015205 | 0.002036 | 0.001758 | 7.30E-05 | 0.010125 | 0.005899 | 0        | 0.001162 | 0        |
| 0.082224 | 0.005888 | 0.001772 | 0.011726 | 0        | 0.005247 | 0.029793 | 0        | 0.007596 | 0.00122  | 0.005423 | 1.45E-04 | 7.10E-05 | 8.03E-04 | 9.02E-04 |
| 1.50E-04 | 0        | 2.94E-04 | 0.001901 | 3.82E-04 | 6.52E-04 | 0.005788 | 2.30E-05 | 1.09E-04 | 3.70E-05 | 4.18E-04 | 1.47E-04 | 0        | 0.00093  | 0.001178 |
| 0.001021 | 1.35E-04 | 1.93E-04 | 0.002065 | 1.12E-04 | 2.11E-04 | 5.97E-04 | 0.001108 | 0.003944 | 0.002117 | 5.59E-04 | 0.001173 | 0        | 6.40E-04 | 0        |
| 2.40E-05 | 0        | 0        | 0        | 0        | 1.45E-04 | 0.003007 | 0        | 1.10E-04 | 0        | 0.009195 | 0        | 0        | 2.70E-05 | 1.45E-04 |
| 1.60E-04 | 0        | 1.00E-04 | 1.08E-04 | 0.002113 | 0        | 1.21E-04 | 0.00325  | 0.003343 | 0        | 7.90E-05 | 0.005445 | 0.00281  | 1.00E-04 | 0        |
| 0        | 0        | 0        | 1.10E-05 | 0        | 0        | 4.93E-04 | 0        | 3.10E-05 | 0        | 7.00E-05 | 0        | 2.18E-04 | 7.42E-04 | 0        |
| 2.31E-04 | 0.002226 | 4.10E-04 | 0        | 1.54E-04 | 0.001138 | 4.03E-04 | 4.81E-04 | 0.005511 | 0.00127  | 0.013375 | 0.00632  | 0.004996 | 0.010426 | 1.45E-04 |
| 2.50E-05 | 0        | 0.01112  | 0        | 0        | 0.001167 | 0.001801 | 6.34E-04 | 0.001673 | 1.13E-04 | 0.001778 | 2.86E-04 | 0        | 5.92E-04 | 0.016278 |
| 1.96E-04 | 0.00276  | 8.20E-04 | 0        | 5.86E-04 | 0.001037 | 3.99E-04 | 5.52E-04 | 0.004714 | 0.001073 | 0.008817 | 0.007753 | 0.012718 | 0.001795 | 5.90E-04 |
| 0.002579 | 0        | 0        | 1.30E-05 | 0        | 2.00E-04 | 0.005331 | 0        | 2.84E-04 | 0        | 0.011397 | 2.99E-04 | 0        | 0.001007 | 0        |
| 0.003609 | 1.30E-04 | 1.02E-04 | 2.86E-04 | 0.004315 | 0        | 0.001858 | 2.99E-04 | 0.001977 | 1.45E-04 | 2.94E-04 | 0        | 6.84E-04 | 2.91E-04 | 7.53E-04 |
| 7.60E-05 | 0        | 0        | 0.001482 | 0        | 0        | 0        | 3.20E-05 | 2.84E-04 | 0        | 0        | 0        | 0        | 1.35E-04 | 0        |
| 0.00104  | 1.32E-04 | 3.19E-04 | 0.008682 | 3.50E-04 | 0        | 0.002315 | 5.05E-04 | 6.40E-04 | 1.40E-04 | 0        | 2.87E-04 | 0.002235 | 1.42E-04 | 2.91E-04 |
| 2.82E-04 | 0        | 0        | 0.001141 | 0        | 0        | 0        | 0        | 3.53E-04 | 4.20E-05 | 0        | 0        | 0        | 1.06E-04 | 0        |
| 0.008272 | 0        | 0        | 5.57E-04 | 0        | 0.001732 | 0.005001 | 0        | 0.001202 | 2.70E-05 | 0        | 7.40E-04 | 0        | 2.39E-04 | 1.48E-04 |
| 0        | 0.003568 | 3.10E-04 | 0.002257 | 0        | 0        | 2.26E-04 | 3.00E-05 | 0        | 0        | 1.56E-04 | 1.53E-04 | 0        | 1.60E-04 | 0.00163  |
| 0        | 0        | 0        | 9.70E-05 | 0        | 0        | 0        | 0        | 0        | 0        | 0        | 0        | 0        | 0        | 0        |
| 1.02E-04 | 0        | 0        | 7.50E-04 | 0        | 0        | 0        | 0        | 2.67E-04 | 0        | 0        | 0        | 0        | 1.16E-04 | 0        |
| 0        | 0.002912 | 9.23E-04 | 0        | 0        | 0        | 9.41E-04 | 2.60E-05 | 4.90E-05 | 0        | 0.005105 | 0.014679 | 0        | 2.55E-04 | 6.01E-04 |
| 9.40E-05 | 0.001949 | 0        | 1.99E-04 | 0        | 0        | 0.008646 | 0        | 0        | 0        | 7.24E-04 | 0        | 0        | 3.03E-04 | 0        |
| 2.80E-05 | 0        | 0        | 2.40E-05 | 0        | 0        | 0        | 3.70E-05 | 0        | 0        | 0        | 0        | 0        | 0        | 0        |
| 2.84E-04 | 4.02E-04 | 0        | 7.80E-05 | 0        | 0        | 0.001441 | 0        | 0        | 0        | 4.82E-04 | 1.41E-04 | 0        | 5.60E-05 | 0        |
| 0        | 0        | 1.11E-04 | 8.50E-05 | 1.20E-04 | 0        | 0        | 0        | 0        | 0        | 0        | 0        | 0        | 0        | 1.46E-04 |
| 0.015019 | 0        | 0        | 1.50E-05 | 0        | 0        | 0        | 0        | 1.31E-04 | 0        | 0        | 0        | 0        | 0        | 0        |
| 0.008831 | 0.008575 | 0.006269 | 0.01419  | 0.005425 | 0.008165 | 0.032485 | 0.004643 | 0.013532 | 0.00167  | 0.020127 | 0.007849 | 0.002022 | 0.009371 | 0.003702 |

| CP21     | CP18     | CP65     | CP08     | CP58     | HC119    | HC121    | HC020    | HC043    | HC091    | HC118    | HC069    | HC115    | HC137    | HC099    |
|----------|----------|----------|----------|----------|----------|----------|----------|----------|----------|----------|----------|----------|----------|----------|
| 0.006551 | 0.006316 | 0.00564  | 0.003334 | 0.003019 | 0.749663 | 0.732483 | 0.59927  | 0.520765 | 0.512556 | 0.491248 | 0.478628 | 0.459956 | 0.43736  | 0.426422 |
| 0.815193 | 0.053782 | 0.942324 | 0.017637 | 0.861555 | 0.002321 | 0.008038 | 0.033265 | 0.011749 | 0.092641 | 0.083082 | 0.021218 | 0.092423 | 0.02702  | 0.070561 |
| 0.013399 | 0.050078 | 0.006506 | 0.001096 | 0.013749 | 0.057209 | 0.057335 | 0.021075 | 0.109519 | 0.164994 | 0.079884 | 0.152198 | 0.119101 | 0.109674 | 0.043096 |
| 0.004929 | 0.312291 | 5.48E-04 | 0.101795 | 0.008615 | 0.055972 | 0.08938  | 0.153538 | 0.075694 | 0.056145 | 0.027876 | 0.113709 | 0.007108 | 0.009242 | 0.24015  |
| 0.032342 | 0.045358 | 3.81E-04 | 6.70E-05 | 0.01023  | 0.001597 | 0.003447 | 0.022779 | 6.86E-04 | 0.001107 | 0.021576 | 3.24E-04 | 0.005807 | 0.025573 | 0.047653 |
| 0.013638 | 0.246817 | 0.001415 | 0.243155 | 0.004087 | 0.005976 | 0.014242 | 0.032235 | 0.07142  | 0.009295 | 0.027728 | 0.00485  | 0.004798 | 0.003499 | 0.033781 |
| 0.006475 | 0.035114 | 0.002456 | 0.270895 | 0.002687 | 0.035265 | 0.025311 | 0.009575 | 0.058534 | 0.046195 | 0.022089 | 0.056661 | 0.023176 | 0.044081 | 0.053276 |
| 0.060273 | 0.006522 | 0.014471 | 4.47E-04 | 0.040441 | 0.004287 | 0.006343 | 0.005645 | 0.00901  | 0.013092 | 0.04567  | 0.003892 | 0.024285 | 0.137119 | 0.008354 |
| 0.001631 | 0.006644 | 0.009922 | 0.293746 | 0.004404 | 0.009112 | 0.011568 | 0.005658 | 0.018943 | 0.002063 | 0.074906 | 0.09004  | 0.134675 | 0.072511 | 0.003035 |
| 0.006726 | 0.006329 | 0.003198 | 0.037167 | 0.009051 | 0.004084 | 0.010307 | 6.47E-04 | 0.015711 | 0.041828 | 0.038492 | 0.005547 | 0.010733 | 0.006637 | 0.012528 |
| 4.13E-04 | 0.048308 | 0.001668 | 1.41E-04 | 7.95E-04 | 0.024864 | 0.001302 | 9.39E-04 | 0.012197 | 0.001629 | 0.007444 | 0.00179  | 0.008408 | 0.002113 | 0.003755 |
| 0        | 2.81E-04 | 1.38E-04 | 7.37E-04 | 1.08E-04 | 8.60E-05 | 1.47E-04 | 0        | 0.001419 | 1.20E-04 | 5.60E-05 | 0        | 0        | 0        | 0        |
| 0.001509 | 0.012331 | 2.50E-05 | 6.50E-05 | 0.001166 | 0.001199 | 3.66E-04 | 0.031454 | 0.001272 | 0.011807 | 0.005853 | 7.36E-04 | 0.002975 | 0.005486 | 0.002124 |
| 0.012196 | 0.015594 | 0.001993 | 0.004347 | 0.006688 | 0.005144 | 0.005929 | 0.005132 | 0.004933 | 0.010062 | 0.014696 | 0.005109 | 0.004096 | 0.002782 | 0.018806 |
| 0.004061 | 0.002719 | 0.00283  | 2.50E-04 | 0.011424 | 0.0026   | 0.002421 | 0.004807 | 0.007607 | 0.003538 | 0.004268 | 0.005055 | 0.005093 | 0.007341 | 0.00504  |
| 6.27E-04 | 0.005499 | 2.31E-04 | 6.70E-05 | 2.24E-04 | 0.008291 | 0.008781 | 0.004478 | 0.027845 | 0.00285  | 0.00693  | 0.009098 | 0.04545  | 0.017468 | 8.75E-04 |
| 9.61E-04 | 0.007261 | 2.01E-04 | 2.10E-05 | 0.001709 | 0.0028   | 0.009189 | 0.049499 | 0.005729 | 0.006222 | 0.005349 | 0.008323 | 4.90E-04 | 0.018234 | 0.005366 |
| 7.65E-04 | 0.004376 | 2.03E-04 | 7.50E-05 | 0.001693 | 0.001423 | 0.001949 | 0.003632 | 0.001655 | 0.00329  | 0.003636 | 0.004543 | 0.002634 | 0.003452 | 0.003167 |
| 1.20E-04 | 0.035409 | 0        | 1.60E-05 | 4.65E-04 | 0.001236 | 2.53E-04 | 0.001035 | 7.76E-04 | 0.00263  | 0.002449 | 2.23E-04 | 3.17E-04 | 5.58E-04 | 0.001551 |
| 4.27E-04 | 0.001812 | 3.01E-04 | 9.80E-05 | 7.81E-04 | 0.006722 | 0.002671 | 0.003209 | 0.004569 | 0.001688 | 0.006385 | 0.001177 | 0.004549 | 0.006043 | 0.001737 |
| 8.45E-04 | 0.014712 | 1.76E-04 | 0.01975  | 4.55E-04 | 4.17E-04 | 0.001069 | 4.63E-04 | 0.003879 | 0.001406 | 0.003169 | 3.36E-04 | 4.01E-04 | 1.55E-04 | 0.006851 |
| 0        | 0        | 0        | 0        | 0        | 0        | 0        | 0        | 0        | 0        | 0        | 0.001743 | 0.002327 | 0.003615 | 0        |
| 0.002332 | 0.012959 | 1.01E-04 | 1.14E-04 | 3.49E-04 | 6.11E-04 | 2.87E-04 | 0.003997 | 6.13E-04 | 0.003269 | 0.00264  | 0.002098 | 5.67E-04 | 0.002713 | 8.81E-04 |
| 5.42E-04 | 3.92E-04 | 9.30E-05 | 1.36E-04 | 0.002286 | 1.72E-04 | 4.00E-05 | 8.70E-05 | 7.09E-04 | 4.60E-05 | 1.76E-04 | 7.70E-05 | 7.62E-04 | 0.002857 | 0        |
| 9.28E-04 | 4.60E-05 | 7.88E-04 | 1.37E-04 | 2.08E-04 | 0.002972 | 0.001727 | 1.71E-04 | 0.013513 | 3.95E-04 | 0.004863 | 0.002515 | 0.012143 | 0.006717 | 2.79E-04 |
| 0        | 6.11E-04 | 3.10E-05 | 4.20E-05 | 0        | 0.006333 | 0.002693 | 1.06E-04 | 0.00534  | 0.001754 | 6.74E-04 | 0.008759 | 0.001464 | 0.005291 | 5.52E-04 |
| 3.38E-04 | 4.38E-04 | 0        | 0        | 0        | 8.30E-05 | 1.50E-05 | 0        | 0        | 0        | 8.17E-04 | 0        | 7.00E-05 | 0.003639 | 0        |
| 1.77E-04 | 0        | 5.90E-05 | 9.90E-05 | 2.49E-04 | 8.90E-05 | 4.40E-05 | 0        | 0.002386 | 8.44E-04 | 5.54E-04 | 8.52E-04 | 0.002389 | 0.006558 | 0        |
| 0        | 0.024025 | 0        | 6.50E-05 | 0        | 6.40E-05 | 2.70E-05 | 0        | 2.90E-05 | 1.51E-04 | 0        | 0        | 0        | 4.10E-05 | 7.30E-05 |
| 5.70E-05 | 0.01454  | 6.20E-05 | 0        | 2.45E-04 | 0.002725 | 2.80E-04 | 2.98E-04 | 0.001574 | 8.01E-04 | 0.001508 | 1.87E-04 | 1.98E-04 | 1.86E-04 | 0.003768 |
| 0.006816 | 4.65E-04 | 0.002243 | 0.001944 | 0.007443 | 1.07E-04 | 3.73E-04 | 0        | 6.92E-04 | 0.002751 | 0.004463 | 2.67E-04 | 6.55E-04 | 3.01E-04 | 0.001631 |
| 3.93E-04 | 0.004841 | 3.52E-04 | 0        | 5.63E-04 | 0.001985 | 5.79E-04 | 5.38E-04 | 0.00232  | 0.001116 | 0.002707 | 5.63E-04 | 9.50E-04 | 5.98E-04 | 0.001485 |
| 1.25E-04 | 0.002647 | 0        | 0        | 0        | 1.07E-04 | 1.40E-05 | 1.37E-04 | 0        | 2.40E-05 | 1.59E-04 | 0        | 0        | 0.00183  | 0        |
| 5.50E-05 | 0.001437 | 0        | 4.20E-05 | 2.31E-04 | 1.33E-04 | 1.11E-04 | 1.90E-04 | 8.70E-04 | 2.21E-04 | 4.35E-04 | 0.012398 | 0.01165  | 5.64E-04 | 4.00E-05 |
| 5.60E-05 | 0        | 0        | 4.40E-05 | 0        | 0        | 3.60E-05 | 0        | 5.53E-04 | 0        | 0        | 0        | 0        | 0        | 0        |
| 1.21E-04 | 2.20E-04 | 5.25E-04 | 1.61E-04 | 0        | 1.83E-04 | 1.62E-04 | 1.75E-04 | 0.002177 | 0        | 2.28E-04 | 0.001412 | 0.002066 | 3.08E-04 | 8.40E-05 |
| 0        | 1.22E-04 | 0        | 0        | 0        | 0        | 0        | 0        | 1.86E-04 | 0        | 0        | 0        | 0        | 0        | 0        |
| 6.00E-05 | 0        | 1.32E-04 | 2.40E-05 | 2.44E-04 | 0        | 0        | 3.43E-04 | 1.01E-04 | 1.90E-05 | 1.61E-04 | 6.10E-05 | 2.00E-05 | 0.01778  | 0        |
| 6.10E-05 | 5.90E-05 | 0        | 0        | 0        | 5.10E-04 | 1.60E-05 | 0        | 1.98E-04 | 8.20E-05 | 0.001165 | 0.002381 | 0.002162 | 8.20E-05 | 1.07E-04 |
| 0        | 0        | 0        | 0        | 0        | 0        | 1.90E-05 | 0        | 0        | 0        | 0        | 6.10E-04 | 2.57E-04 | 0.001695 | 0        |
| 0        | 0        | 0        | 3.90E-05 | 0        | 0        | 2.60E-05 | 0        | 1.42E-04 | 2.90E-05 | 0        | 0        | 0        | 0        | 0        |
| 4.31E-04 | 6.35E-04 | 2.45E-04 | 0        | 5.75E-04 | 1.22E-04 | 1.66E-04 | 1.73E-04 | 1.55E-04 | 3.00E-04 | 9.90E-04 | 5.00E-05 | 7.10E-05 | 1.46E-04 | 8.07E-04 |
| 8.56E-04 | 2.15E-04 | 0        | 2.50E-05 | 1.15E-04 | 2.60E-05 | 3.70E-05 | 1.41E-04 | 8.80E-05 | 2.05E-04 | 5.90E-05 | 2.60E-05 | 1.30E-04 | 5.66E-04 | 0        |
| 0        | 0        | 0        | 1.46E-04 | 0        | 1.69E-04 | 0        | 0        | 0        | 0        | 0        | 0        | 1.22E-04 | 7.80E-05 | 0        |
| 6.00E-05 | 6.16E-04 | 0        | 2.50E-05 | 0        | 2.20E-05 | 0        | 3.10E-05 | 0        | 1.13E-04 | 0        | 0        | 2.10E-04 | 1.41E-04 | 0        |
| 0        | 6.30E-05 | 0        | 0        | 0        | 0        | 0        | 0        | 2.90E-05 | 5.60E-05 | 0        | 0        | 0        | 0        | 0        |
| 0        | 1.45E-04 | 0        | 0        | 0        | 0        | 0        | 0        | 0        | 0        | 0        | 0        | 0        | 0        | 0        |
| 0.003511 | 0.017971 | 7.42E-04 | 0.002051 | 0.004146 | 0.003319 | 8.17E-04 | 0.005278 | 0.004413 | 0.002666 | 0.005615 | 0.002544 | 0.005312 | 0.007946 | 0.002165 |

| HC039    | HC092    | HC090    | HC005    | HC030    | HC052    | HC067    | HC053    | HC009    | HC144    | HC001    | HC031    | HC066    | HC011    | HC055    |
|----------|----------|----------|----------|----------|----------|----------|----------|----------|----------|----------|----------|----------|----------|----------|
| 0.41889  | 0.399843 | 0.383033 | 0.371822 | 0.368435 | 0.359927 | 0.347826 | 0.333209 | 0.326341 | 0.323885 | 0.323228 | 0.315107 | 0.312342 | 0.301282 | 0.296677 |
| 0.004487 | 0.013082 | 0.295771 | 0.035189 | 0.313931 | 0.029143 | 0.002174 | 0.019971 | 0.01755  | 0.032796 | 0.257681 | 0.28374  | 0.097756 | 0.071371 | 0.12859  |
| 0.099032 | 0.076892 | 0.010076 | 0.059445 | 0.077954 | 0.185211 | 0.155795 | 0.119683 | 0.031638 | 0.065741 | 0.040784 | 0.090193 | 0.126005 | 0.080807 | 0.152403 |
| 0.025611 | 0.064281 | 0.017839 | 0.097385 | 0.038269 | 0.052394 | 0.025608 | 0.124793 | 0.013969 | 0.089854 | 0.041172 | 0.012734 | 0.020695 | 0.044669 | 0.055441 |
| 0.002725 | 0.004787 | 0.008132 | 0.05571  | 0.027774 | 0.025627 | 0.011497 | 0.004589 | 0.021086 | 0.005882 | 0.079523 | 0.041929 | 0.043381 | 0.123957 | 0.043924 |
| 6.43E-04 | 0.062031 | 0.038508 | 0.099688 | 0.010551 | 0.032683 | 0.00769  | 0.059559 | 0.010991 | 0.163896 | 0.038509 | 0.006239 | 0.016597 | 0.011892 | 0.002806 |
| 0.024975 | 0.095211 | 0.019706 | 0.100853 | 0.035956 | 0.109227 | 0.085865 | 0.144371 | 0.02588  | 0.131099 | 0.012954 | 0.022693 | 0.052202 | 0.032388 | 0.020639 |
| 0.031926 | 0.020479 | 0.065516 | 0.010509 | 0.035696 | 0.039178 | 0.051309 | 0.008442 | 0.090422 | 0.044374 | 0.037099 | 0.074012 | 0.132196 | 0.058948 | 0.093209 |
| 0.218454 | 0.006375 | 0.07376  | 0.01039  | 0.006328 | 0.002889 | 0.194324 | 0.052389 | 0.011088 | 0.013582 | 0.004674 | 0.007375 | 0.017898 | 0.043943 | 0.023156 |
| 6.28E-04 | 0.025262 | 0.008164 | 0.024204 | 0.013584 | 0.053058 | 0.006908 | 0.011823 | 0.017671 | 0.011914 | 0.045377 | 0.024604 | 0.026717 | 0.060558 | 0.055043 |
| 3.72E-04 | 0.0254   | 0.008676 | 0.010449 | 0.006118 | 0.017439 | 0.005126 | 0.006704 | 0.008029 | 0.017829 | 0.0081   | 0.009862 | 0.006391 | 0.008589 | 0.003829 |
| 9.90E-05 | 0.002751 | 1.09E-04 | 0.00167  | 0        | 0        | 0        | 0        | 0.254452 | 8.53E-04 | 4.29E-04 | 0        | 0        | 0        | 0        |
| 0.009289 | 0.006997 | 0.005076 | 0.013077 | 0.014013 | 0.005642 | 0.002481 | 0.002974 | 0.020758 | 0.002062 | 0.008415 | 0.014943 | 0.020493 | 0.019426 | 0.013952 |
| 0.00392  | 0.006062 | 0.008467 | 0.011132 | 0.007151 | 0.0066   | 0.004822 | 0.010166 | 4.57E-04 | 0.011643 | 0.010234 | 0.0078   | 0.004953 | 0.003019 | 0.005831 |
| 0.009033 | 0.004952 | 0.005278 | 0.00703  | 0.003684 | 0.004757 | 0.007218 | 0.008135 | 0.007225 | 0.01689  | 0.007688 | 0.005054 | 0.009438 | 0.017848 | 0.007622 |
| 0.023013 | 0.031821 | 0.015212 | 0.019768 | 0.005122 | 0.004317 | 0.022594 | 0.020681 | 0.004991 | 0.010355 | 0.010232 | 0.014733 | 0.005968 | 0.011882 | 0.004356 |
| 0.008787 | 0.009276 | 0.00631  | 0.009948 | 0.009646 | 0.008441 | 0.007597 | 0.004188 | 0.020909 | 0.004792 | 0.00352  | 0.016879 | 0.01817  | 0.010223 | 0.01459  |
| 0.010709 | 0.006932 | 0.001933 | 0.007424 | 0.003652 | 0.008132 | 0.004996 | 0.008484 | 0.017659 | 0.006155 | 0.003583 | 0.001518 | 0.019239 | 0.013791 | 0.010849 |
| 2.40E-04 | 0.001417 | 6.97E-04 | 0.003237 | 0.001417 | 0.00249  | 0.001759 | 0.001227 | 0.006191 | 0.002371 | 0.001618 | 0.001664 | 0.002451 | 0.006871 | 0.003901 |
| 0.002418 | 0.009246 | 0.003051 | 0.019772 | 0.005017 | 0.012046 | 0.004171 | 0.016217 | 0.006549 | 0.008018 | 0.007675 | 0.005718 | 0.013609 | 0.00668  | 0.006092 |
| 9.80E-05 | 0.008955 | 0.002477 | 0.00807  | 7.82E-04 | 0.002553 | 9.13E-04 | 0.007484 | 9.30E-05 | 0.018051 | 0.002764 | 3.73E-04 | 0.001035 | 3.11E-04 | 1.38E-04 |
| 3.30E-05 | 3.10E-05 | 0        | 0        | 0.003624 | 0.012272 | 0.003814 | 0.004703 | 1.19E-04 | 0        | 0        | 0.001514 | 0.006086 | 0.02275  | 0.002333 |
| 0.004867 | 0.00127  | 0.001612 | 0.005073 | 1.72E-04 | 0.00224  | 0.005111 | 0.002462 | 0.005774 | 0.002547 | 1.59E-04 | 0.001423 | 0.006083 | 9.09E-04 | 0.002398 |
| 3.46E-04 | 6.31E-04 | 1.60E-05 | 3.78E-04 | 2.51E-04 | 2.68E-04 | 0.001575 | 1.73E-04 | 3.42E-04 | 5.36E-04 | 0.002014 | 0.001277 | 2.53E-04 | 0.00208  | 0.002829 |
| 0.004778 | 1.74E-04 | 0.001777 | 5.02E-04 | 9.16E-04 | 4.01E-04 | 0.003882 | 0.00166  | 8.53E-04 | 4.51E-04 | 0.002349 | 0.012019 | 0.017086 | 4.04E-04 | 0.013957 |
| 0.007115 | 0.009552 | 0.001756 | 0.003462 | 0.002293 | 0.005823 | 0.003952 | 0.014617 | 0.002148 | 0.002932 | 6.73E-04 | 0.003074 | 0.003953 | 0.002164 | 0.005112 |
| 4.73E-04 | 0.008579 | 0.009043 | 7.75E-04 | 4.17E-04 | 0.001321 | 5.50E-05 | 2.73E-04 | 0.001711 | 4.17E-04 | 0.01632  | 0.002328 | 3.21E-04 | 0.012037 | 9.70E-04 |
| 0.005839 | 4.18E-04 | 1.40E-05 | 1.65E-04 | 2.70E-05 | 2.60E-05 | 0.022044 | 2.87E-04 | 2.04E-04 | 1.22E-04 | 0        | 5.72E-04 | 1.28E-04 | 9.10E-05 | 0.006031 |
| 0        | 0.084477 | 1.80E-05 | 0.001152 | 1.95E-04 | 1.57E-04 | 8.40E-05 | 1.95E-04 | 9.82E-04 | 6.70E-05 | 0.01135  | 0        | 0        | 7.20E-05 | 0        |
| 8.00E-05 | 0.001158 | 6.27E-04 | 0.001597 | 2.64E-04 | 8.86E-04 | 2.38E-04 | 8.29E-04 | 1.80E-05 | 0.001532 | 6.84E-04 | 4.93E-04 | 3.04E-04 | 1.40E-04 | 5.12E-04 |
| 0        | 6.38E-04 | 0.001318 | 0.001184 | 0.001047 | 0.001401 | 5.80E-05 | 3.45E-04 | 3.80E-05 | 7.77E-04 | 0.002911 | 0.002494 | 7.40E-04 | 6.99E-04 | 0.002852 |
| 0.001331 | 0.00132  | 5.26E-04 | 0.001274 | 6.57E-04 | 0.002489 | 8.58E-04 | 6.73E-04 | 8.50E-05 | 0.001501 | 6.10E-04 | 0.001315 | 0.00111  | 5.44E-04 | 0.001149 |
| 1.55E-04 | 3.92E-04 | 0        | 2.04E-04 | 1.00E-04 | 8.86E-04 | 0.001059 | 7.70E-05 | 0.001391 | 4.94E-04 | 8.55E-04 | 0.007442 | 8.85E-04 | 0.00192  | 0.002033 |
| 0.033044 | 3.97E-04 | 2.80E-05 | 7.80E-05 | 1.30E-04 | 2.15E-04 | 5.60E-04 | 0.00173  | 3.77E-04 | 2.44E-04 | 1.39E-04 | 1.44E-04 | 2.44E-04 | 3.01E-04 | 0.002993 |
| 0        | 2.24E-04 | 0        | 1.16E-04 | 0        | 0        | 0        | 0        | 0.018904 | 7.70E-05 | 0        | 0        | 0        | 0        | 0        |
| 0.005094 | 1.77E-04 | 1.25E-04 | 1.30E-04 | 1.87E-04 | 9.60E-05 | 1.16E-04 | 3.95E-04 | 4.44E-04 | 3.30E-05 | 8.90E-05 | 4.53E-04 | 4.39E-04 | 2.38E-04 | 0.001424 |
| 0        | 2.21E-04 | 1.50E-05 | 9.10E-05 | 0        | 0        | 0        | 0        | 0.018917 | 7.40E-05 | 0        | 0        | 0        | 0        | 0        |
| 0.006353 | 1.07E-04 | 6.70E-05 | 2.13E-04 | 1.10E-04 | 1.80E-04 | 3.57E-04 | 3.10E-05 | 4.10E-05 | 4.42E-04 | 1.54E-04 | 1.53E-04 | 6.07E-04 | 0.002495 | 0.002804 |
| 0.01819  | 1.32E-04 | 4.45E-04 | 8.17E-04 | 7.70E-05 | 2.30E-05 | 0        | 3.32E-04 | 2.98E-04 | 1.17E-04 | 3.50E-05 | 0        | 9.20E-05 | 4.80E-05 | 0        |
| 0        | 0        | 0        | 0        | 9.08E-04 | 0.002832 | 0.001021 | 0.001307 | 7.50E-05 | 0        | 0        | 2.37E-04 | 0.001894 | 0.00545  | 4.24E-04 |
| 0        | 2.62E-04 | 0        | 1.68E-04 | 0        | 0        | 0        | 0        | 0.013506 | 8.40E-05 | 0        | 0        | 0        | 0        | 0        |
| 2.72E-04 | 3.38E-04 | 8.16E-04 | 4.48E-04 | 2.49E-04 | 5.17E-04 | 1.64E-04 | 9.20E-05 | 9.50E-05 | 0.0012   | 4.80E-04 | 8.14E-04 | 4.28E-04 | 1.90E-04 | 9.48E-04 |
| 0.00108  | 4.80E-04 | 1.31E-04 | 0        | 6.90E-05 | 1.56E-04 | 1.48E-04 | 1.08E-04 | 5.56E-04 | 5.10E-05 | 2.43E-04 | 4.47E-04 | 8.62E-04 | 7.12E-04 | 0.001342 |
| 3.20E-05 | 3.30E-05 | 8.70E-05 | 0        | 3.94E-04 | 7.63E-04 | 1.65E-04 | 3.19E-04 | 1.40E-05 | 0        | 3.60E-05 | 2.60E-05 | 4.77E-04 | 0.005718 | 1.38E-04 |
| 6.20E-05 | 3.80E-05 | 0        | 0        | 7.10E-05 | 2.53E-04 | 9.30E-05 | 2.20E-05 | 5.57E-04 | 0        | 2.19E-04 | 1.25E-04 | 6.46E-04 | 9.62E-04 | 3.58E-04 |
| 0        | 7.60E-05 | 0        | 7.50E-05 | 2.73E-04 | 0        | 2.30E-05 | 2.50E-05 | 2.20E-05 | 0        | 0        | 0        | 0        | 0        | 4.60E-05 |
| 0        | 1.70E-05 | 0        | 0        | 1.90E-05 | 0        | 0        | 0        | 1.42E-04 | 0        | 0        | 0        | 0        | 0        | 0        |
| 0.015507 | 0.006806 | 0.003788 | 0.005326 | 0.00247  | 0.005041 | 0.00395  | 0.004256 | 0.018438 | 0.00426  | 0.015421 | 0.00648  | 0.009826 | 0.011621 | 0.006299 |

| HC033    | HC107    | HC048    | HC136    | HC097    | HC080    | HC044    | HC008    | HC116    | HC002    | HC074    | HC081    | HC142    | HC146    | HC035    |
|----------|----------|----------|----------|----------|----------|----------|----------|----------|----------|----------|----------|----------|----------|----------|
| 0.293473 | 0.292491 | 0.29203  | 0.286185 | 0.280487 | 0.27779  | 0.270566 | 0.264115 | 0.262053 | 0.252232 | 0.247444 | 0.247061 | 0.243083 | 0.242149 | 0.2418   |
| 0.032769 | 5.11E-04 | 9.03E-04 | 0.240786 | 0.168284 | 0.089833 | 0.012175 | 0.063164 | 0.48968  | 0.005517 | 0.153106 | 0.111819 | 0.283812 | 0.126209 | 0.043054 |
| 0.253366 | 0.013801 | 0.104063 | 0.083666 | 0.060638 | 0.038209 | 0.037082 | 0.144977 | 0.047806 | 0.10296  | 0.075129 | 0.211142 | 0.110075 | 0.006455 | 0.083669 |
| 0.012788 | 0.205967 | 0.421526 | 0.008645 | 0.181588 | 0.018625 | 0.091962 | 0.160026 | 0.022914 | 0.297807 | 0.048239 | 0.049698 | 0.009175 | 0.011086 | 0.074496 |
| 0.159947 | 0.006696 | 5.18E-04 | 0.048615 | 0.048013 | 0.243551 | 0.008096 | 0.006549 | 0.025402 | 0.002409 | 0.214849 | 0.001242 | 0.039144 | 0.348025 | 0.032893 |
| 0.006235 | 0.123852 | 0.018004 | 0.003096 | 0.051204 | 0.028677 | 0.142376 | 0.049221 | 0.027613 | 0.060883 | 0.069145 | 0.054638 | 0.010113 | 0.026338 | 0.124422 |
| 0.038372 | 0.133941 | 0.09972  | 0.009827 | 0.012795 | 0.014834 | 0.087367 | 0.032023 | 0.009727 | 0.160807 | 0.016646 | 0.029246 | 0.013474 | 0.010432 | 0.086521 |
| 0.020684 | 0.014945 | 0.001238 | 0.126436 | 0.015222 | 0.088952 | 0.108774 | 0.030106 | 0.035931 | 0.001549 | 0.026773 | 0.009    | 0.062958 | 0.093057 | 0.07967  |
| 0.038386 | 0.037389 | 0.002008 | 0.096564 | 0.002709 | 0.007923 | 0.011247 | 0.00641  | 0.003313 | 0.002312 | 0.006092 | 0.125306 | 0.066188 | 0.018106 | 0.02341  |
| 0.002781 | 0.00109  | 0.001994 | 0.033904 | 0.059262 | 0.007942 | 0.009225 | 0.05732  | 0.019217 | 0.002936 | 0.056245 | 0.006318 | 0.020758 | 0.001636 | 0.03836  |
| 0.004541 | 0.022579 | 0.002631 | 0.004221 | 0.002127 | 0.001754 | 0.023958 | 0.02624  | 0.00331  | 0.018978 | 0.007457 | 0.004588 | 8.42E-04 | 8.57E-04 | 0.01814  |
| 0        | 5.34E-04 | 2.83E-04 | 0        | 2.70E-05 | 2.90E-05 | 0.068105 | 0.038882 | 0        | 9.48E-04 | 9.40E-05 | 7.82E-04 | 0        | 0        | 0        |
| 0.001746 | 0.021137 | 0.001165 | 0.005677 | 0.030103 | 0.077636 | 0.006219 | 0.005405 | 0.006711 | 0.004428 | 0.004357 | 0.001856 | 0.009214 | 0.022389 | 0.010385 |
| 0.004854 | 0.01252  | 0.019048 | 0.004115 | 0.010846 | 0.006304 | 0.002414 | 0.00267  | 0.007108 | 0.026237 | 0.013527 | 0.006385 | 0.008329 | 0.003101 | 0.008936 |
| 0.004618 | 0.007976 | 0.00123  | 0.002798 | 0.004796 | 0.007587 | 0.006377 | 0.002675 | 0.002436 | 0.003698 | 0.005879 | 0.032249 | 0.0143   | 0.011597 | 0.013162 |
| 4.64E-04 | 0.001706 | 0.016619 | 0.00671  | 0.002329 | 0.008046 | 0.016126 | 8.88E-04 | 0.001919 | 0.008902 | 0.003719 | 0.018904 | 0.037846 | 0.00565  | 0.02291  |
| 0.010449 | 0.022816 | 7.32E-04 | 0.005025 | 0.033936 | 0.031341 | 0.012391 | 0.008999 | 0.005111 | 0.004423 | 0.004091 | 0.003256 | 0.003293 | 0.049819 | 0.014301 |
| 0.003255 | 0.008609 | 0.001395 | 0.001972 | 0.006086 | 0.010905 | 0.015718 | 0.005123 | 0.004591 | 0.002497 | 0.005895 | 0.016367 | 0.002954 | 0.001837 | 0.01319  |
| 0.001006 | 0.00544  | 0.001848 | 4.07E-04 | 0.007824 | 0.001312 | 0.004053 | 0.00634  | 0.002316 | 0.004216 | 0.003164 | 3.03E-04 | 0.00139  | 2.24E-04 | 0.008107 |
| 0.005101 | 0.014788 | 6.06E-04 | 0.003625 | 0.001432 | 0.01361  | 0.006512 | 0.008402 | 0.003133 | 0.003888 | 0.004214 | 0.002874 | 0.005557 | 0.001266 | 0.008627 |
| 3.28E-04 | 0.012593 | 0.002423 | 1.54E-04 | 0.001414 | 8.41E-04 | 0.002554 | 0.001181 | 7.88E-04 | 0.009295 | 0.003022 | 0.003284 | 7.93E-04 | 7.40E-05 | 0.010006 |
| 0.00924  | 0        | 0        | 0.002158 | 0        | 0        | 0        | 1.88E-04 | 0.002268 | 3.20E-05 | 0        | 0        | 0        | 0        | 0.010602 |
| 2.28E-04 | 0.00307  | 1.00E-04 | 9.10E-04 | 9.52E-04 | 7.99E-04 | 0.001348 | 0.001464 | 0.001207 | 6.87E-04 | 0.001447 | 0.014694 | 0.004083 | 0.002532 | 0.004564 |
| 0.016394 | 5.10E-04 | 4.34E-04 | 0.001606 | 0.001168 | 2.79E-04 | 1.17E-04 | 3.08E-04 | 3.38E-04 | 2.66E-04 | 1.69E-04 | 0        | 0.012387 | 0.008638 | 0.001134 |
| 0.004979 | 7.96E-04 | 2.45E-04 | 0.003283 | 3.07E-04 | 2.24E-04 | 0.001327 | 0.031983 | 0.002245 | 0.001717 | 6.67E-04 | 7.56E-04 | 0.002284 | 4.30E-05 | 0.001785 |
| 0.004376 | 0.009766 | 0.003337 | 0.002513 | 1.97E-04 | 3.80E-05 | 8.30E-04 | 0.006351 | 9.07E-04 | 0.004534 | 8.59E-04 | 0.001776 | 0.001584 | 0        | 0.004789 |
| 0.058522 | 4.60E-05 | 0        | 8.78E-04 | 1.95E-04 | 0.004362 | 5.90E-05 | 9.60E-05 | 0.001777 | 1.26E-04 | 0.015407 | 0        | 0.003235 | 1.25E-04 | 0.003496 |
| 1.04E-04 | 3.35E-04 | 2.64E-04 | 0.002697 | 7.40E-05 | 4.00E-05 | 8.80E-05 | 0.004018 | 8.06E-04 | 0.001143 | 4.00E-05 | 0.006815 | 2.41E-04 | 0        | 9.60E-05 |
| 0        | 1.90E-04 | 3.91E-04 | 0        | 3.50E-05 | 5.80E-05 | 2.76E-04 | 3.42E-04 | 0        | 1.42E-04 | 1.45E-04 | 0        | 3.90E-05 | 0        | 5.60E-05 |
| 2.27E-04 | 0.006393 | 0.00179  | 1.54E-04 | 0.00167  | 1.07E-04 | 4.87E-04 | 7.87E-04 | 2.53E-04 | 0.007253 | 0.001138 | 5.83E-04 | 1.08E-04 | 1.70E-05 | 0.00235  |
| 1.28E-04 | 0        | 1.93E-04 | 0.002514 | 0.003633 | 3.77E-04 | 1.14E-04 | 1.43E-04 | 0.001894 | 3.74E-04 | 0.003264 | 4.15E-04 | 0.001867 | 1.15E-04 | 0.001265 |
| 0.001059 | 0.002003 | 8.21E-04 | 6.68E-04 | 0.001202 | 4.24E-04 | 1.09E-04 | 8.33E-04 | 4.25E-04 | 0.002289 | 0.001169 | 0.002688 | 5.16E-04 | 0        | 0.001966 |
| 1.70E-05 | 3.30E-04 | 2.70E-05 | 5.90E-05 | 3.88E-04 | 0.008791 | 3.33E-04 | 7.72E-04 | 0.001194 | 2.38E-04 | 4.28E-04 | 0        | 0.00172  | 4.03E-04 | 0        |
| 0.002024 | 0.001016 | 1.35E-04 | 9.25E-04 | 3.46E-04 | 0        | 0.001337 | 5.69E-04 | 3.03E-04 | 3.29E-04 | 8.50E-05 | 0.009579 | 1.09E-04 | 1.36E-04 | 3.47E-04 |
| 0        | 0        | 2.90E-05 | 0        | 0        | 9.40E-05 | 0.015951 | 0.002559 | 0        | 1.34E-04 | 4.30E-05 | 1.23E-04 | 4.40E-05 | 2.80E-05 | 0        |
| 2.90E-05 | 2.78E-04 | 0        | 5.85E-04 | 5.40E-05 | 3.87E-04 | 8.80E-05 | 0.004724 | 3.85E-04 | 9.90E-05 | 0        | 6.05E-04 | 9.30E-05 | 4.98E-04 | 1.00E-04 |
| 0        | 9.00E-05 | 0        | 0        | 2.10E-05 | 3.40E-05 | 0.007983 | 9.90E-04 | 0        | 1.01E-04 | 4.20E-05 | 0        | 2.80E-05 | 0        | 0        |
| 1.10E-05 | 6.67E-04 | 0        | 0.001642 | 0.001718 | 0.001018 | 7.25E-04 | 5.48E-04 | 0        | 2.02E-04 | 2.54E-04 | 5.70E-05 | 0.015049 | 1.69E-04 | 0.001153 |
| 5.30E-05 | 2.78E-04 | 0        | 3.34E-04 | 2.00E-05 | 0        | 0        | 4.36E-04 | 2.40E-05 | 1.90E-04 | 3.00E-05 | 0.016569 | 7.75E-04 | 1.90E-05 | 0        |
| 0.002182 | 0        | 0        | 4.86E-04 | 0        | 0        | 2.40E-05 | 2.80E-04 | 3.62E-04 | 0        | 0        | 0        | 0        | 0        | 0.002387 |
| 0        | 5.20E-05 | 0        | 0        | 1.80E-05 | 0        | 0.007206 | 0.001572 | 0        | 8.70E-05 | 0        | 6.30E-05 | 0        | 0        | 0        |
| 5.40E-05 | 6.77E-04 | 8.50E-05 | 5.65E-04 | 3.57E-04 | 3.23E-04 | 9.86E-04 | 1.33E-04 | 1.40E-04 | 2.01E-04 | 1.55E-04 | 1.64E-04 | 2.69E-04 | 5.80E-05 | 7.60E-04 |
| 1.86E-04 | 3.68E-04 | 0        | 2.86E-04 | 6.08E-04 | 0.001122 | 1.99E-04 | 3.17E-04 | 4.81E-04 | 3.60E-05 | 4.20E-05 | 0        | 0        | 0.003098 | 5.85E-04 |
| 1.66E-04 | 0        | 6.20E-05 | 7.00E-05 | 0        | 0        | 0        | 3.54E-04 | 2.10E-05 | 0        | 0        | 0        | 2.59E-04 | 0        | 2.84E-04 |
| 3.08E-04 | 4.20E-05 | 0        | 9.20E-05 | 1.42E-04 | 7.85E-04 | 0        | 1.72E-04 | 2.57E-04 | 0        | 3.15E-04 | 0        | 2.03E-04 | 5.90E-05 | 1.10E-04 |
| 0        | 0        | 0        | 1.90E-05 | 0        | 2.60E-05 | 3.10E-05 | 1.69E-04 | 0        | 0        | 0        | 0        | 3.80E-05 | 0        | 3.40E-05 |
| 0        | 0        | 0        | 0        | 0        | 0        | 1.96E-04 | 2.30E-05 | 0        | 0        | 0        | 0        | 0        | 0        | 0        |
| 0.00455  | 0.011712 | 0.002103 | 0.005128 | 0.005773 | 0.005011 | 0.016889 | 0.019153 | 0.003634 | 0.002898 | 0.005214 | 0.008795 | 0.011771 | 0.003755 | 0.006078 |

| HC085    | HC075    | HC138    | HC019    | HC147    | HC010    | HC145    | HC038    | HC109    | HC042    | HC041    | HC014    | HC034    | HC093    | HC060    |
|----------|----------|----------|----------|----------|----------|----------|----------|----------|----------|----------|----------|----------|----------|----------|
| 0.226439 | 0.219582 | 0.216927 | 0.210593 | 0.20887  | 0.205886 | 0.192117 | 0.187638 | 0.18575  | 0.178242 | 0.175045 | 0.171418 | 0.170871 | 0.170019 | 0.168474 |
| 0.002765 | 0.146174 | 0.061874 | 0.001901 | 0.043809 | 0.227889 | 0.020394 | 0.119453 | 0.595877 | 0.001193 | 0.067792 | 0.001908 | 0.01041  | 0.106205 | 0.01439  |
| 0.045414 | 0.128207 | 0.043671 | 0.016952 | 0.100555 | 0.040244 | 0.020516 | 0.05466  | 0.109656 | 0.02586  | 0.10127  | 0.176754 | 0.061802 | 0.030611 | 0.436525 |
| 0.284947 | 0.080115 | 0.0132   | 0.116032 | 0.023368 | 0.05736  | 0.143954 | 0.087897 | 0.015283 | 0.062091 | 0.082428 | 0.21903  | 0.06698  | 0.106995 | 0.047939 |
| 0.007878 | 0.023138 | 0.271208 | 0.005282 | 0.318991 | 0.065891 | 0.037786 | 0.014106 | 0.023008 | 8.47E-04 | 0.385209 | 0.00281  | 0.004013 | 0.00861  | 0.044146 |
| 0.079998 | 0.045342 | 0.020291 | 0.307555 | 0.015352 | 0.059262 | 0.301241 | 0.010269 | 0.007333 | 0.21014  | 0.054166 | 0.108998 | 0.083138 | 0.051986 | 0.003903 |
| 0.120063 | 0.076334 | 0.014227 | 0.081791 | 0.012442 | 0.02859  | 0.113575 | 0.079041 | 0.01216  | 0.418237 | 0.010043 | 0.090382 | 0.106303 | 0.10123  | 0.030502 |
| 0.023111 | 0.048056 | 0.134492 | 0.069861 | 0.164317 | 0.072729 | 0.021155 | 0.134682 | 0.001943 | 0.0045   | 0.022274 | 0.019415 | 0.026893 | 0.171198 | 0.037814 |
| 0.006005 | 0.066152 | 0.019671 | 0.012191 | 0.009027 | 0.017981 | 0.002653 | 0.003955 | 0.002343 | 0.030521 | 0.00252  | 0.017417 | 9.84E-04 | 0.087124 | 0.024357 |
| 0.053168 | 0.013926 | 0.069108 | 0.00184  | 0.021649 | 0.032187 | 0.006744 | 0.171034 | 0.003178 | 0.001292 | 0.029413 | 9.55E-04 | 0.110821 | 0.020923 | 0.020087 |
| 0.01776  | 0.018202 | 0.005027 | 0.006061 | 0.00346  | 0.039575 | 0.026611 | 0.004916 | 7.73E-04 | 0.011942 | 0.006507 | 0.021637 | 0.020227 | 0.00506  | 0.010694 |
| 0.002198 | 0.008543 | 0        | 3.62E-04 | 5.90E-05 | 0        | 1.79E-04 | 3.44E-04 | 4.80E-05 | 3.34E-04 | 0        | 0.015963 | 0        | 6.50E-04 | 1.58E-04 |
| 0.013134 | 0.004929 | 0.015805 | 0.018351 | 0.009468 | 0.013973 | 0.006945 | 0.01424  | 0.006339 | 4.14E-04 | 0.014748 | 0.001144 | 0.009677 | 0.014444 | 0.010368 |
| 0.012461 | 0.00407  | 0.008474 | 9.93E-04 | 0.008216 | 0.005181 | 0.016299 | 0.022577 | 0.010889 | 0.008232 | 0.015079 | 0.003849 | 0.002896 | 0.003411 | 0.008852 |
| 0.015119 | 0.005794 | 0.010464 | 0.008314 | 0.00338  | 0.017017 | 0.005838 | 0.020051 | 0.001557 | 0.011517 | 0.006235 | 0.005955 | 0.003965 | 0.007089 | 0.01657  |
| 0.005331 | 0.02399  | 0.013342 | 0.015431 | 0.006087 | 0.008539 | 0.003705 | 0.001335 | 0.001293 | 0.002011 | 5.61E-04 | 0.015859 | 0.002391 | 0.009946 | 0.058114 |
| 0.013208 | 0.008684 | 0.010404 | 0.050465 | 0.011081 | 0.00998  | 0.009836 | 0.018643 | 0.006096 | 7.50E-05 | 0.001892 | 0.005797 | 0.00647  | 0.041519 | 0.010948 |
| 0.019308 | 0.008927 | 0.002952 | 0.018137 | 0.005079 | 0.018995 | 0.002868 | 0.010533 | 0.001683 | 0.0056   | 0.005879 | 0.011026 | 0.01107  | 0.029184 | 0.006743 |
| 0.010081 | 0.004142 | 0.008034 | 0.007499 | 0.004362 | 0.001172 | 0.006873 | 0.010559 | 1.51E-04 | 3.65E-04 | 0.0013   | 0.00211  | 0.003794 | 0.001426 | 0.001002 |
| 0.006938 | 0.007879 | 0.004564 | 0.007116 | 0.003221 | 0.012228 | 0.003693 | 0.00214  | 0.002602 | 4.85E-04 | 0.002758 | 0.010868 | 0.004771 | 0.001421 | 0.004254 |
| 0.007031 | 0.001589 | 0.001253 | 0.001768 | 0.001106 | 0.001439 | 0.023085 | 0.002625 | 6.20E-04 | 0.016889 | 0.001938 | 0.003571 | 0.006278 | 0.00189  | 3.51E-04 |
| 0        | 0        | 0.004242 | 0        | 0        | 0.02519  | 0        | 0        | 0        | 0        | 0        | 0.032994 | 0.112764 | 0        | 0        |
| 0.009108 | 0.001611 | 0.001617 | 2.50E-04 | 0.008931 | 0.003098 | 8.68E-04 | 4.36E-04 | 3.33E-04 | 3.45E-04 | 5.82E-04 | 0.00358  | 0.00134  | 3.67E-04 | 0.003501 |
| 2.63E-04 | 0.004374 | 0.005075 | 0.001567 | 5.44E-04 | 1.90E-04 | 1.70E-04 | 4.58E-04 | 1.55E-04 | 6.68E-04 | 8.85E-04 | 7.60E-04 | 3.33E-04 | 0.004318 | 0.002069 |
| 3.89E-04 | 0.002745 | 0.00205  | 9.00E-05 | 6.45E-04 | 3.06E-04 | 4.12E-04 | 8.38E-04 | 6.86E-04 | 0.002369 | 1.85E-04 | 4.10E-05 | 0.043903 | 1.52E-04 | 0.00529  |
| 0.003071 | 0.013    | 9.68E-04 | 2.73E-04 | 1.78E-04 | 0.003106 | 8.00E-04 | 9.07E-04 | 1.75E-04 | 0.001126 | 9.50E-05 | 0.014003 | 0.005293 | 1.50E-04 | 0.00375  |
| 7.72E-04 | 0.00159  | 0.011647 | 0.014658 | 0.001313 | 0.004504 | 4.88E-04 | 1.40E-05 | 4.30E-05 | 3.70E-05 | 0        | 2.60E-04 | 5.62E-04 | 2.52E-04 | 1.61E-04 |
| 4.10E-05 | 0.001484 | 0        | 0        | 2.10E-05 | 2.29E-04 | 0        | 0        | 0.002144 | 3.60E-05 | 0        | 0.009274 | 8.29E-04 | 0        | 1.44E-04 |
| 2.20E-05 | 0.013078 | 0        | 5.50E-04 | 0        | 0.003672 | 0.012019 | 1.20E-05 | 0.002916 | 1.25E-04 | 0        | 4.17E-04 | 0.070204 | 0.001297 | 2.60E-05 |
| 0.003565 | 8.26E-04 | 3.09E-04 | 3.71E-04 | 5.43E-04 | 0.001676 | 0.005521 | 0.002573 | 8.80E-05 | 5.09E-04 | 0.001576 | 6.51E-04 | 3.99E-04 | 2.28E-04 | 0.001742 |
| 0.002494 | 7.84E-04 | 0.002101 | 0        | 9.10E-04 | 7.59E-04 | 4.99E-04 | 0.0105   | 9.92E-04 | 9.00E-05 | 7.95E-04 | 3.90E-05 | 9.13E-04 | 5.45E-04 | 8.92E-04 |
| 0.001048 | 0.001031 | 8.90E-04 | 5.80E-05 | 0.001422 | 6.90E-04 | 0.001819 | 0.002219 | 6.22E-04 | 4.08E-04 | 0.001522 | 0.001265 | 4.32E-04 | 2.40E-04 | 0.005788 |
| 4.84E-04 | 2.50E-04 | 0.011608 | 3.00E-05 | 0.002916 | 4.82E-04 | 6.66E-04 | 1.80E-05 | 2.30E-04 | 0        | 0        | 2.09E-04 | 9.97E-04 | 2.79E-04 | 3.76E-04 |
| 1.59E-04 | 3.93E-04 | 3.40E-05 | 0.00292  | 1.80E-04 | 1.31E-04 | 1.66E-04 | 5.20E-05 | 1.01E-04 | 5.59E-04 | 8.70E-05 | 0.002375 | 1.64E-04 | 0.002713 | 0.001587 |
| 6.80E-05 | 0.00124  | 0        | 4.00E-04 | 3.30E-05 | 0        | 5.70E-05 | 4.40E-05 | 0        | 1.21E-04 | 0        | 0.001214 | 0        | 0.001848 | 4.00E-05 |
| 5.00E-05 | 1.20E-04 | 6.60E-05 | 2.14E-04 | 6.10E-05 | 1.17E-04 | 0        | 1.60E-05 | 8.60E-05 | 3.91E-04 | 1.69E-04 | 1.22E-04 | 0.001767 | 5.91E-04 | 6.90E-05 |
| 1.62E-04 | 4.30E-04 | 0        | 0.001305 | 0        | 0        | 1.58E-04 | 0        | 0        | 2.40E-05 | 0        | 4.08E-04 | 0        | 9.46E-04 | 0        |
| 2.60E-05 | 9.88E-04 | 5.95E-04 | 5.18E-04 | 2.71E-04 | 6.42E-04 | 3.99E-04 | 8.30E-05 | 4.40E-04 | 2.39E-04 | 2.50E-05 | 2.87E-04 | 0        | 4.24E-04 | 0.001247 |
| 0.001443 | 0.001261 | 0        | 3.40E-05 | 3.00E-05 | 1.73E-04 | 7.50E-05 | 0        | 2.88E-04 | 0        | 0        | 0        | 3.40E-05 | 7.20E-04 | 0.002754 |
| 0        | 0        | 8.11E-04 | 0        | 0        | 0.006804 | 0        | 0        | 0        | 0        | 0        | 0.008697 | 0.027949 | 0        | 0        |
| 2.44E-04 | 5.00E-04 | 0        | 6.65E-04 | 0        | 0        | 1.04E-04 | 4.00E-05 | 0        | 3.50E-05 | 0        | 0.000649 | 0        | 0.001049 | 0        |
| 4.26E-04 | 3.59E-04 | 7.94E-04 | 1.82E-04 | 7.41E-04 | 6.75E-04 | 8.09E-04 | 0.003101 | 9.70E-05 | 5.70E-05 | 5.86E-04 | 1.22E-04 | 9.80E-05 | 6.38E-04 | 5.46E-04 |
| 2.48E-04 | 4.31E-04 | 3.38E-04 | 9.39E-04 | 1.71E-04 | 2.72E-04 | 3.79E-04 | 8.10E-05 | 9.90E-05 | 1.70E-05 | 3.30E-05 | 7.20E-05 | 3.95E-04 | 0.00197  | 8.60E-05 |
| 0        | 5.80E-05 | 1.65E-04 | 2.50E-05 | 0        | 0.004374 | 0        | 4.30E-05 | 0        | 2.60E-05 | 0        | 5.20E-05 | 0.012517 | 1.71E-04 | 0        |
| 5.80E-05 | 1.40E-04 | 0.001295 | 0        | 5.40E-05 | 4.81E-04 | 4.40E-05 | 1.40E-05 | 0        | 0        | 0        | 0        | 2.29E-04 | 6.32E-04 | 2.40E-04 |
| 3.00E-05 | 2.50E-05 | 0        | 0        | 0        | 4.20E-05 | 0        | 9.50E-05 | 0        | 0        | 0        | 0        | 0        | 5.50E-05 | 3.10E-05 |
| 0        | 0        | 0        | 0        | 0        | 1.60E-05 | 0        | 0        | 0        | 0        | 0        | 0        | 0        | 2.10E-05 | 0        |
| 0.003472 | 0.009507 | 0.010407 | 0.016456 | 0.007137 | 0.006253 | 0.00848  | 0.007758 | 0.001923 | 0.002031 | 0.006403 | 0.015643 | 0.005124 | 0.009453 | 0.01347  |

| HC016    | HC023    | HC040    | HC133    | HC059    | HC029    | HC022    | HC086    | HC131    | HC012    | HC098    | HC106    | HC049    | HC004    | HC027    |
|----------|----------|----------|----------|----------|----------|----------|----------|----------|----------|----------|----------|----------|----------|----------|
| 0.164461 | 0.150602 | 0.150104 | 0.148212 | 0.140561 | 0.134185 | 0.122125 | 0.116846 | 0.116174 | 0.111059 | 0.109212 | 0.106783 | 0.088532 | 0.083869 | 0.080106 |
| 0.307429 | 0.285877 | 0.086972 | 0.280782 | 0.007154 | 0.073788 | 0.350082 | 0.058853 | 0.030528 | 0.263098 | 0.004714 | 0.051175 | 0.294406 | 0.028535 | 0.01254  |
| 0.060573 | 0.122272 | 0.005492 | 0.057032 | 0.031051 | 0.168363 | 0.079788 | 0.058886 | 0.13789  | 0.051654 | 0.055942 | 0.134713 | 0.040268 | 0.143674 | 0.231122 |
| 0.097549 | 0.052359 | 0.040437 | 0.012288 | 0.052722 | 0.097759 | 0.058068 | 0.082713 | 0.131525 | 0.032699 | 0.036614 | 0.100476 | 0.05377  | 0.171635 | 0.311611 |
| 0.134531 | 0.160606 | 0.345998 | 0.010632 | 0.006816 | 0.056358 | 0.036784 | 0.387327 | 0.029708 | 0.184909 | 0.257561 | 0.257227 | 0.168451 | 0.20759  | 0.036579 |
| 0.02743  | 0.015604 | 0.018548 | 0.01881  | 0.054589 | 0.030383 | 0.142816 | 0.046755 | 0.27381  | 0.066677 | 0.003213 | 0.091024 | 0.02149  | 0.12346  | 0.053402 |
| 0.008313 | 0.019159 | 0.002432 | 0.040355 | 0.059183 | 0.03299  | 0.052998 | 0.033061 | 0.049674 | 0.031201 | 0.006288 | 0.016693 | 0.022785 | 0.046232 | 0.018688 |
| 0.032972 | 0.038245 | 0.242251 | 0.059851 | 0.040119 | 0.221094 | 0.028033 | 0.035056 | 0.024896 | 0.091754 | 0.376529 | 0.029247 | 0.103104 | 0.04473  | 0.003227 |
| 0.006134 | 0.006799 | 0.005266 | 0.069883 | 0.024984 | 0.012784 | 0.002622 | 0.002466 | 0.006495 | 0.010423 | 0.010783 | 0.002023 | 0.003836 | 0.005672 | 7.00E-04 |
| 0.086611 | 0.0365   | 0.004499 | 0.159543 | 0.024983 | 0.036437 | 0.025166 | 0.070067 | 0.001665 | 0.041355 | 0.043492 | 0.088896 | 0.049583 | 0.02484  | 0.146598 |
| 0.013041 | 0.004159 | 7.27E-04 | 0.004565 | 0.032943 | 0.003793 | 0.033889 | 0.01756  | 0.042562 | 0.014996 | 0.002199 | 0.022207 | 0.024553 | 0.021443 | 0.008061 |
| 0        | 3.06E-04 | 0        | 0        | 0.395367 | 3.59E-04 | 1.72E-04 | 2.67E-04 | 0.001448 | 0        | 0        | 6.10E-05 | 1.19E-04 | 1.28E-04 | 0        |
| 0.004406 | 0.007025 | 0.013989 | 0.015297 | 0.005668 | 0.029392 | 0.002809 | 0.021014 | 0.012826 | 0.006184 | 0.007466 | 0.005405 | 0.02462  | 0.00811  | 0.003688 |
| 0.013938 | 0.013687 | 0.005766 | 0.00249  | 4.51E-04 | 0.009912 | 0.01443  | 0.01387  | 0.013679 | 0.010744 | 0.007384 | 0.019468 | 0.021616 | 0.02046  | 0.020815 |
| 0.008319 | 0.007783 | 0.007346 | 0.027864 | 0.007221 | 0.013742 | 0.004919 | 0.006983 | 0.013327 | 0.007262 | 0.009188 | 0.005536 | 0.009496 | 0.009371 | 0.00723  |
| 0.001704 | 7.65E-04 | 0.008787 | 7.78E-04 | 0.002855 | 0.005742 | 2.79E-04 | 0.005356 | 0.001699 | 0.006584 | 0.004725 | 0.002803 | 0.006417 | 0.002216 | 0.005753 |
| 0.001932 | 0.006272 | 0.018458 | 0.004339 | 0.004756 | 0.005292 | 0.00368  | 0.003881 | 0.009564 | 0.008589 | 4.35E-04 | 0.003345 | 0.005168 | 0.007072 | 0.005942 |
| 0.001416 | 0.018736 | 0.002811 | 0.008661 | 0.006786 | 0.018579 | 0.004688 | 0.006766 | 0.01211  | 0.006825 | 0.008919 | 0.010801 | 0.002695 | 0.00257  | 0.009159 |
| 0.001635 | 0.007313 | 0.0014   | 0.001312 | 0.003623 | 0.009199 | 0.002428 | 0.00259  | 0.007582 | 0.009899 | 0.005353 | 0.004767 | 0.007354 | 0.008767 | 0.01091  |
| 0.002581 | 0.011506 | 0.003287 | 0.003609 | 0.005581 | 0.006191 | 0.009578 | 0.008101 | 0.010349 | 0.004362 | 0.002012 | 0.001357 | 0.004348 | 0.002943 | 6.87E-04 |
| 9.17E-04 | 0.001014 | 5.50E-05 | 0.001091 | 1.60E-04 | 0.001713 | 0.009406 | 0.003357 | 0.014266 | 0.00264  | 1.28E-04 | 0.004275 | 0.002047 | 0.013884 | 0.004619 |
| 0.003449 | 0        | 0        | 0.028841 | 1.11E-04 | 0        | 0        | 0        | 0        | 0.006694 | 0        | 0        | 0        | 0        | 0        |
| 2.29E-04 | 0.005515 | 0.001597 | 8.41E-04 | 0.00251  | 0.003844 | 0.00149  | 0.001032 | 0.025529 | 0.003426 | 0.013752 | 0.008738 | 6.41E-04 | 2.22E-04 | 0.003023 |
| 0.001699 | 0.001824 | 7.98E-04 | 0.003232 | 2.41E-04 | 0.001906 | 6.20E-05 | 6.29E-04 | 0.007949 | 0.001145 | 0.0072   | 4.36E-04 | 0.004444 | 4.48E-04 | 1.03E-04 |
| 0.003774 | 9.80E-04 | 5.41E-04 | 3.68E-04 | 5.68E-04 | 4.27E-04 | 1.34E-04 | 3.45E-04 | 2.11E-04 | 8.78E-04 | 1.88E-04 | 0        | 4.50E-04 | 3.37E-04 | 0        |
| 3.26E-04 | 0.001524 | 0        | 9.96E-04 | 0.001807 | 0.002241 | 5.25E-04 | 5.46E-04 | 9.29E-04 | 0.001585 | 6.40E-05 | 8.89E-04 | 3.69E-04 | 0        | 6.46E-04 |
| 2.93E-04 | 0.001744 | 0.022559 | 0.001489 | 1.01E-04 | 0.003155 | 0        | 0.001699 | 6.00E-05 | 0.007802 | 0.003155 | 0.004041 | 0.00816  | 0.002643 | 5.70E-05 |
| 9.70E-05 | 0.001443 | 0        | 0        | 4.00E-05 | 0.001093 | 7.10E-05 | 0        | 2.70E-05 | 0        | 0        | 1.09E-04 | 0        | 0        | 5.20E-05 |
| 0        | 0        | 1.05E-04 | 2.80E-05 | 7.10E-05 | 5.70E-05 | 0        | 1.36E-04 | 5.50E-05 | 1.90E-05 | 0        | 3.13E-04 | 6.90E-05 | 1.36E-04 | 0        |
| 0.001619 | 9.01E-04 | 2.82E-04 | 2.80E-05 | 3.09E-04 | 8.02E-04 | 0.003415 | 0.002932 | 0.005842 | 8.35E-04 | 8.36E-04 | 0.00386  | 0.005026 | 0.005915 | 0.009222 |
| 0.004126 | 0.003926 | 4.80E-04 | 0.004677 | 1.18E-04 | 0.001754 | 0.001426 | 0.002609 | 2.30E-05 | 0.00222  | 4.42E-04 | 0.003298 | 0.006926 | 0.001061 | 0.004344 |
| 5.78E-04 | 0.001617 | 1.76E-04 | 3.19E-04 | 1.84E-04 | 0.001386 | 0.003766 | 0.001782 | 0.005758 | 0.001004 | 0.001157 | 0.004218 | 0.003326 | 0.003504 | 0.004878 |
| 0.001138 | 0.003962 | 0.001562 | 0.002701 | 4.10E-05 | 3.95E-04 | 2.90E-04 | 1.12E-04 | 0        | 8.62E-04 | 0.005632 | 0.00504  | 0.003494 | 0.001818 | 1.04E-04 |
| 6.90E-05 | 1.40E-04 | 3.80E-05 | 1.43E-04 | 2.57E-04 | 0.001958 | 3.10E-05 | 3.30E-05 | 5.40E-05 | 4.57E-04 | 1.17E-04 | 2.00E-04 | 5.10E-05 | 0        | 0        |
| 0        | 1.00E-04 | 0        | 0        | 0.025978 | 1.10E-04 | 3.60E-05 | 2.60E-05 | 2.14E-04 | 0        | 0        | 0        | 0        | 0        | 0        |
| 0        | 3.60E-05 | 6.10E-05 | 0        | 6.70E-05 | 3.03E-04 | 2.62E-04 | 3.00E-05 | 0        | 1.33E-04 | 3.50E-05 | 6.60E-05 | 0        | 3.20E-05 | 4.80E-05 |
| 0        | 0        | 0        | 0        | 0.024337 | 9.00E-05 | 0        | 3.70E-05 | 1.14E-04 | 0        | 0        | 0        | 0        | 3.00E-05 | 0        |
| 4.93E-04 | 0.001811 | 0.001037 | 0.007513 | 1.85E-04 | 0.00181  | 0        | 1.86E-04 | 2.57E-04 | 6.93E-04 | 0.001461 | 4.90E-05 | 5.60E-05 | 1.56E-04 | 0        |
| 3.50E-05 | 0        | 0        | 0        | 0.001203 | 8.10E-05 | 3.90E-05 | 0        | 0        | 0        | 0        | 5.30E-05 | 0        | 0        | 6.75E-04 |
| 8.06E-04 | 0        | 0        | 0.005684 | 1.67E-04 | 0        | 0        | 0        | 0        | 0.001549 | 0        | 0        | 0        | 0        | 0        |
| 0        | 3.50E-05 | 0        | 0        | 0.016283 | 3.60E-05 | 0        | 3.40E-05 | 1.54E-04 | 0        | 0        | 3.00E-05 | 0        | 2.10E-05 | 9.00E-05 |
| 8.69E-04 | 7.24E-04 | 8.28E-04 | 7.60E-05 | 1.49E-04 | 0.001793 | 6.64E-04 | 8.60E-04 | 7.67E-04 | 9.60E-04 | 0.003755 | 9.60E-04 | 0.003546 | 0.001563 | 4.25E-04 |
| 7.40E-05 | 1.12E-04 | 4.07E-04 | 0.001673 | 1.65E-04 | 4.25E-04 | 5.10E-05 | 3.30E-05 | 6.89E-04 | 2.02E-04 | 4.50E-05 | 0        | 0        | 0        | 4.80E-05 |
| 8.10E-05 | 0        | 0        | 0.002151 | 2.30E-05 | 0        | 0        | 0        | 0        | 5.04E-04 | 0        | 0        | 0        | 0        | 0        |
| 2.05E-04 | 2.06E-04 | 3.04E-04 | 0.001449 | 1.42E-04 | 6.10E-05 | 0        | 3.10E-05 | 2.56E-04 | 1.02E-04 | 1.62E-04 | 7.00E-05 | 2.09E-04 | 0        | 0        |
| 0        | 0        | 0        | 0        | 0        | 3.00E-05 | 0        | 0        | 0        | 0        | 0        | 0        | 0        | 0        | 0        |
| 0        | 0        | 0        | 0        | 0        | 0        | 0        | 0        | 0        | 0        | 0        | 6.20E-05 | 0        | 0        | 0        |
| 0.004148 | 0.006811 | 0.0046   | 0.010397 | 0.01737  | 0.008188 | 0.002978 | 0.005133 | 0.009335 | 0.006016 | 0.009842 | 0.009286 | 0.008575 | 0.004913 | 0.004848 |

| HC125    | HC143    | HC018    | HC071    | HC063    | HC148    | HC084    | HC037    | HC139    | HC104    | HC123    | HC083    | HC025    | HC141    | HC095    |
|----------|----------|----------|----------|----------|----------|----------|----------|----------|----------|----------|----------|----------|----------|----------|
| 0.080008 | 0.077461 | 0.07646  | 0.075304 | 0.071828 | 0.071129 | 0.069294 | 0.068305 | 0.051909 | 0.047104 | 0.043856 | 0.042345 | 0.041996 | 0.041618 | 0.04112  |
| 0.653705 | 0.1274   | 0.189352 | 0.375714 | 0.076794 | 0.606682 | 0.004154 | 0.405504 | 0.114443 | 0.00311  | 0.177502 | 0.008182 | 0.013078 | 0.275729 | 0.024756 |
| 0.135686 | 0.088269 | 0.052557 | 0.040919 | 0.042618 | 0.004423 | 0.04241  | 0.041255 | 0.037174 | 0.323126 | 0.249786 | 0.095866 | 0.135851 | 0.019189 | 0.058902 |
| 0.005838 | 0.157592 | 0.0513   | 0.041007 | 0.158626 | 0.00886  | 0.200017 | 0.060338 | 0.011762 | 0.03419  | 0.035514 | 0.103246 | 0.230298 | 0.042651 | 0.206661 |
| 0.008323 | 0.037145 | 0.120444 | 0.207357 | 0.035552 | 0.098179 | 0.027236 | 0.006784 | 0.274143 | 0.108192 | 0.289339 | 0.381961 | 0.223283 | 0.322519 | 0.106161 |
| 0.004129 | 0.065518 | 0.06101  | 0.062783 | 0.178801 | 0.003144 | 0.123765 | 0.224341 | 0.007098 | 0.01253  | 0.030008 | 0.059349 | 0.082752 | 0.084625 | 0.109958 |
| 0.008031 | 0.062802 | 0.052068 | 0.011806 | 0.167664 | 0.003281 | 0.312726 | 0.036888 | 0.005763 | 0.082293 | 0.006048 | 0.074404 | 0.044822 | 9.35E-04 | 0.076438 |
| 0.05957  | 0.028878 | 0.116595 | 0.05197  | 0.029747 | 0.119454 | 0.005285 | 0.029199 | 0.219043 | 0.04588  | 0.042649 | 0.011659 | 0.018189 | 0.036498 | 0.127313 |
| 0.002423 | 0.020887 | 0.045683 | 0.003296 | 0.002393 | 0.0112   | 0.001076 | 0.00378  | 0.015404 | 0.005953 | 0.019923 | 0.004013 | 0.006503 | 5.10E-04 | 0.013516 |
| 0.002035 | 0.161741 | 0.103589 | 0.019597 | 0.010884 | 0.016121 | 0.062433 | 0.019531 | 0.12802  | 0.212345 | 0.027811 | 0.057627 | 0.021283 | 0.132352 | 0.007463 |
| 7.68E-04 | 0.028353 | 0.018896 | 0.005877 | 0.057422 | 9.43E-04 | 0.020836 | 0.027853 | 0.009213 | 0.008001 | 0.007131 | 0.008727 | 0.034336 | 0.002386 | 0.018653 |
| 0        | 0.023676 | 0.001035 | 0        | 4.87E-04 | 0        | 0.005364 | 0        | 0        | 0        | 1.98E-04 | 3.18E-04 | 0.00231  | 6.90E-05 | 0.001727 |
| 0.001672 | 0.009228 | 0.008382 | 0.021234 | 0.011834 | 0.007984 | 0.010803 | 9.77E-04 | 0.022861 | 0.010323 | 0.010493 | 0.034416 | 0.027837 | 6.97E-04 | 0.023392 |
| 0.00621  | 0.001927 | 0.003897 | 0.011191 | 0.02962  | 0.008824 | 0.020866 | 0.002137 | 0.005336 | 0.01794  | 0.013808 | 0.020538 | 0.013589 | 0.016767 | 0.010321 |
| 0.004892 | 0.008122 | 0.010628 | 0.0047   | 0.005414 | 0.005651 | 0.005395 | 0.005217 | 0.012841 | 0.00931  | 0.006706 | 0.009418 | 0.01304  | 5.16E-04 | 0.007666 |
| 0.003817 | 0.012    | 0.004261 | 0.003751 | 0.008003 | 0.006043 | 0.004755 | 6.69E-04 | 0.005513 | 9.36E-04 | 3.10E-05 | 0.00316  | 3.10E-04 | 1.97E-04 | 0.016592 |
| 0.003347 | 0.004882 | 0.010384 | 0.007928 | 0.01486  | 0.0075   | 0.00709  | 0.001572 | 0.001794 | 0.011157 | 0.00459  | 0.007809 | 0.002227 | 0        | 0.027971 |
| 0.002037 | 0.008303 | 0.007241 | 0.001969 | 0.004585 | 0.004371 | 0.017837 | 0.006482 | 0.003362 | 0.016368 | 0.004323 | 0.003937 | 0.014788 | 8.82E-04 | 0.021311 |
| 1.51E-04 | 0.006813 | 0.017355 | 0.008506 | 0.011316 | 0.001173 | 0.013474 | 0.006112 | 0.015661 | 0.011225 | 0.002052 | 0.016578 | 0.011925 | 0.003563 | 0.037708 |
| 0.002984 | 0.006039 | 0.01227  | 0.009235 | 0.016842 | 6.39E-04 | 0.003278 | 0.003269 | 0.004469 | 0.001068 | 0.011279 | 0.011638 | 0.00432  | 0        | 0.013378 |
| 2.13E-04 | 7.67E-04 | 0.001365 | 0.002329 | 0.027148 | 8.10E-05 | 0.01816  | 0.003696 | 4.19E-04 | 0.004134 | 4.79E-04 | 0.01036  | 0.006474 | 0.001112 | 0.006408 |
| 0        | 8.10E-05 | 0        | 0.001391 | 4.50E-05 | 0        | 0        | 0.026244 | 0.002837 | 0        | 0        | 0        | 2.80E-05 | 0        | 0        |
| 0.002055 | 6.59E-04 | 0.00304  | 0.001095 | 1.78E-04 | 0.00204  | 0.005075 | 0.001607 | 0.001198 | 0.005309 | 0.001596 | 0.001823 | 0.008159 | 0        | 0.002469 |
| 3.59E-04 | 0.006729 | 0.007988 | 0.001199 | 0.002472 | 0.003994 | 5.60E-05 | 1.45E-04 | 0.013527 | 0        | 0.001037 | 0.001705 | 0.007885 | 0.00342  | 0.001186 |
| 6.40E-04 | 3.26E-04 | 0.001514 | 0.002631 | 5.73E-04 | 6.93E-04 | 1.16E-04 | 2.80E-04 | 0.002897 | 0        | 5.39E-04 | 3.64E-04 | 2.70E-05 | 0.001111 | 2.19E-04 |
| 0.001017 | 0.001907 | 0.001747 | 9.00E-04 | 0.001813 | 0        | 0.001223 | 0.001614 | 6.40E-05 | 8.60E-04 | 0.001806 | 7.83E-04 | 2.02E-04 | 0        | 0.00108  |
| 1.37E-04 | 0.002681 | 4.06E-04 | 0.001899 | 6.31E-04 | 0        | 1.00E-04 | 2.59E-04 | 0.00296  | 9.30E-05 | 0        | 0.001878 | 2.80E-05 | 2.57E-04 | 0.002793 |
| 0.002129 | 0        | 4.32E-04 | 7.20E-05 | 1.38E-04 | 0        | 0        | 2.98E-04 | 0        | 1.86E-04 | 8.20E-04 | 5.30E-05 | 3.50E-05 | 0        | 1.04E-04 |
| 0        | 0.005846 | 1.75E-04 | 5.90E-05 | 0.003746 | 0        | 3.69E-04 | 0.003143 | 0        | 0        | 0        | 4.60E-05 | 3.50E-05 | 2.16E-04 | 5.70E-05 |
| 3.90E-05 | 8.44E-04 | 7.90E-04 | 0.001124 | 0.01176  | 1.05E-04 | 0.004837 | 8.51E-04 | 1.84E-04 | 0.001876 | 7.36E-04 | 0.003413 | 0.007589 | 8.21E-04 | 0.004395 |
| 0.001096 | 8.29E-04 | 0.001814 | 0.002454 | 0.001688 | 0.002869 | 0.00122  | 2.86E-04 | 0.004652 | 0.009626 | 0.002495 | 0.002448 | 5.74E-04 | 0.004318 | 2.90E-04 |
| 0.00093  | 4.80E-04 | 5.82E-04 | 6.86E-04 | 0.004458 | 3.10E-05 | 0.001216 | 1.59E-04 | 6.11E-04 | 0.006153 | 0.002323 | 0.002674 | 0.00405  | 3.93E-04 | 0.00164  |
| 5.61E-04 | 0.001305 | 4.53E-04 | 0.008849 | 4.20E-04 | 0.001217 | 7.50E-05 | 6.16E-04 | 0.012934 | 4.32E-04 | 0        | 0.010486 | 0.010583 | 4.20E-05 | 0.012707 |
| 1.41E-04 | 2.26E-04 | 6.66E-04 | 1.20E-04 | 7.50E-05 | 0        | 1.78E-04 | 6.70E-05 | 0        | 0        | 7.80E-05 | 0        | 9.40E-05 | 0        | 7.99E-04 |
| 0        | 0.003704 | 2.45E-04 | 0        | 4.80E-05 | 3.20E-05 | 6.14E-04 | 0        | 0        | 0        | 2.40E-05 | 1.34E-04 | 3.92E-04 | 0        | 4.76E-04 |
| 4.30E-05 | 7.30E-05 | 4.80E-04 | 3.58E-04 | 0        | 0        | 0        | 4.88E-04 | 0        | 0        | 1.51E-04 | 0        | 0        | 1.23E-04 | 2.10E-05 |
| 0        | 0.001791 | 5.20E-05 | 0        | 1.35E-04 | 0        | 6.70E-04 | 0        | 0        | 0        | 8.60E-05 | 5.60E-05 | 3.88E-04 | 0        | 3.97E-04 |
| 7.90E-04 | 4.77E-04 | 0.002918 | 2.87E-04 | 0        | 3.23E-04 | 5.50E-05 | 6.00E-05 | 4.33E-04 | 0        | 5.50E-05 | 1.35E-04 | 1.23E-04 | 1.86E-04 | 0.00112  |
| 3.60E-05 | 0        | 2.66E-04 | 8.00E-05 | 0        | 0        | 6.70E-05 | 7.40E-05 | 0        | 0        | 0        | 0        | 0        | 0        | 3.30E-05 |
| 0        | 2.00E-05 | 0        | 1.75E-04 | 0        | 0        | 0        | 0.006106 | 6.60E-04 | 0        | 0        | 0        | 0        | 0        | 0        |
| 0        | 0.001644 | 1.31E-04 | 0        | 0        | 0        | 6.45E-04 | 0        | 0        | 0        | 6.20E-05 | 2.40E-05 | 2.17E-04 | 0        | 2.51E-04 |
| 4.34E-04 | 1.25E-04 | 5.70E-04 | 4.54E-04 | 0.001533 | 3.09E-04 | 2.01E-04 | 1.21E-04 | 7.20E-04 | 0.001242 | 7.09E-04 | 5.56E-04 | 9.53E-04 | 3.86E-04 | 0.001829 |
| 0        | 8.96E-04 | 3.61E-04 | 5.31E-04 | 1.11E-04 | 5.70E-05 | 5.66E-04 | 8.20E-05 | 1.02E-04 | 4.65E-04 | 4.10E-05 | 6.00E-05 | 4.50E-05 | 3.50E-05 | 9.72E-04 |
| 0        | 0        | 6.20E-05 | 9.90E-05 | 0        | 0        | 3.00E-05 | 0.001635 | 1.80E-04 | 0        | 0        | 0        | 0        | 7.30E-05 | 1.80E-05 |
| 0        | 0.001369 | 1.38E-04 | 2.23E-04 | 1.93E-04 | 2.00E-04 | 2.74E-04 | 2.26E-04 | 5.40E-04 | 0        | 1.91E-04 | 5.59E-04 | 2.90E-04 | 9.00E-05 | 6.31E-04 |
| 0        | 2.00E-04 | 0        | 0        | 0        | 0        | 0        | 0        | 0        | 0        | 1.55E-04 | 0        | 0        | 4.90E-05 | 0        |
| 0        | 4.70E-05 | 0        | 0        | 0        | 0        | 0        | 0        | 0        | 0        | 0        | 0        | 0        | 0        | 0        |
| 0.003754 | 0.029938 | 0.010398 | 0.008841 | 0.007545 | 0.002448 | 0.006159 | 0.00173  | 0.009273 | 0.008573 | 0.00357  | 0.007252 | 0.009092 | 0.005665 | 0.009098 |

| HC082    | HC045    | HC047    | HC006    | HC112    | HC089    | HC135    | HC101    | HC108    | HC150    | HC130    | HC058    | HC110    | HC126    | HC087    |
|----------|----------|----------|----------|----------|----------|----------|----------|----------|----------|----------|----------|----------|----------|----------|
| 0.037841 | 0.033062 | 0.029079 | 0.027851 | 0.027696 | 0.025858 | 0.020633 | 0.019689 | 0.018635 | 0.017297 | 0.015824 | 0.008918 | 0.007702 | 0.003843 | 0.00262  |
| 0.01122  | 0.1974   | 0.022694 | 0.021225 | 0.333784 | 0.075402 | 0.213716 | 0.377265 | 0.024326 | 0.284804 | 0.349871 | 0.006063 | 0.056921 | 0.297475 | 0.017778 |
| 0.010187 | 0.043995 | 0.17477  | 0.075279 | 0.035587 | 0.031072 | 0.078638 | 0.066085 | 0.083    | 0.03225  | 0.039915 | 0.002976 | 0.0113   | 0.044576 | 0.028431 |
| 0.037018 | 0.076614 | 0.053634 | 0.169139 | 0.02459  | 0.236531 | 0.135414 | 0.033111 | 0.056866 | 0.041695 | 0.023648 | 0.116283 | 0.391211 | 0.028928 | 0.064507 |
| 0.033278 | 0.31696  | 0.369319 | 0.088769 | 0.241692 | 0.14352  | 0.025455 | 0.108446 | 0.02687  | 0.277378 | 0.17722  | 0.026559 | 0.004833 | 0.372834 | 0.246324 |
| 0.048842 | 0.061104 | 0.065357 | 0.140973 | 0.038432 | 0.094667 | 0.106578 | 0.039735 | 0.044512 | 0.034569 | 0.062471 | 0.073641 | 0.328369 | 0.09654  | 0.020145 |
| 0.017962 | 0.020143 | 0.043463 | 0.124047 | 0.004375 | 0.041686 | 0.055156 | 0.037481 | 0.053439 | 0.007102 | 0.017217 | 0.052076 | 0.090007 | 0.005878 | 0.011781 |
| 0.042595 | 0.064932 | 0.06502  | 0.015542 | 0.133193 | 0.019364 | 0.041023 | 0.153228 | 0.124547 | 0.132435 | 0.015727 | 0.014683 | 0.006578 | 0.033904 | 0.253802 |
| 0.006484 | 0.00554  | 0.003479 | 0.001294 | 0.015884 | 0.018302 | 0.036042 | 0.009078 | 0.032281 | 0.008997 | 0.003076 | 0.007745 | 3.45E-04 | 6.78E-04 | 0.042068 |
| 0.009489 | 0.067011 | 0.018179 | 0.18119  | 0.061904 | 0.045584 | 0.013137 | 0.039955 | 0.091161 | 0.045395 | 0.21151  | 0.004011 | 0.019842 | 0.008396 | 0.167512 |
| 0.017395 | 0.009913 | 0.023215 | 0.012683 | 0.009745 | 0.047418 | 0.042651 | 0.017833 | 0.010053 | 0.010083 | 0.00183  | 0.055947 | 0.01463  | 0.004463 | 0.012492 |
| 0.499077 | 4.35E-04 | 0.001263 | 1.78E-04 | 0        | 0.018947 | 0        | 2.70E-04 | 0.112269 | 9.90E-05 | 1.06E-04 | 0.491083 | 0.001638 | 6.66E-04 | 0        |
| 0.004114 | 0.015296 | 0.011006 | 0.017953 | 0.01032  | 0.004469 | 0.003226 | 0.006679 | 0.105744 | 0.006045 | 0.002179 | 0.005481 | 3.55E-04 | 0.017653 | 0.001868 |
| 6.40E-05 | 0.00569  | 0.013455 | 0.025504 | 0.006669 | 0.00711  | 0.00327  | 0.018547 | 0.001142 | 0.019796 | 0.009906 | 0.001459 | 0.016595 | 0.024    | 0.006212 |
| 0.003754 | 0.014648 | 0.003712 | 0.005293 | 0.012543 | 0.004433 | 0.010159 | 0.014717 | 0.015378 | 0.010744 | 0.01136  | 0.005147 | 5.78E-04 | 0.007772 | 0.011419 |
| 0.001692 | 0.004626 | 0.005245 | 0.006085 | 9.35E-04 | 0.009023 | 0.005647 | 0.003893 | 0.004796 | 0.001445 | 0.00109  | 0.002794 | 8.00E-05 | 3.73E-04 | 0.001906 |
| 0.005124 | 0.026176 | 0.007268 | 0.006448 | 0.001022 | 0.003007 | 0.002977 | 0.001831 | 0.021814 | 0.007112 | 0.002829 | 0.001045 | 7.25E-04 | 0.004503 | 1.34E-04 |
| 0.002749 | 0.006627 | 0.012332 | 0.008159 | 0.010246 | 0.009935 | 0.014972 | 0.007913 | 0.055045 | 0.002233 | 0.009791 | 0.004691 | 0.004658 | 0.005497 | 0.019408 |
| 0.006063 | 0.003183 | 0.030632 | 0.012226 | 0.004078 | 0.030497 | 0.009639 | 0.00242  | 0.012786 | 0.005969 | 0.003413 | 0.012279 | 0.006071 | 0.001188 | 0.04162  |
| 0.002297 | 0.005527 | 0.007909 | 0.004645 | 0.001815 | 0.008947 | 0.004005 | 0.005621 | 0.006769 | 0.002275 | 0.001236 | 0.006191 | 8.90E-05 | 0.00236  | 0.001141 |
| 7.60E-05 | 9.45E-04 | 0.00568  | 0.024096 | 7.83E-04 | 0.002935 | 0.002299 | 0.00361  | 4.86E-04 | 0.002401 | 0.003757 | 0.00179  | 0.025321 | 0.003632 | 6.96E-04 |
| 2.50E-05 | 0        | 0        | 0        | 0.005969 | 0.045937 | 0.106442 | 0        | 0        | 0        | 0        | 2.40E-05 | 0        | 0        | 0.008411 |
| 0.002053 | 0.001038 | 0.005351 | 0.003061 | 5.21E-04 | 6.98E-04 | 0.002087 | 0.001572 | 0.008179 | 0.003907 | 0.012356 | 0.003785 | 1.03E-04 | 0.002944 | 0.004513 |
| 0.00184  | 0.001938 | 5.43E-04 | 5.34E-04 | 0.001812 | 0.013729 | 9.92E-04 | 0.003491 | 0.001815 | 0.00602  | 0.001905 | 2.37E-04 | 1.01E-04 | 5.93E-04 | 0.003219 |
| 2.50E-05 | 4.34E-04 | 3.30E-05 | 5.01E-04 | 9.01E-04 | 0.003839 | 2.55E-04 | 1.79E-04 | 5.61E-04 | 9.40E-04 | 3.70E-04 | 1.03E-04 | 0        | 7.40E-05 | 3.19E-04 |
| 4.57E-04 | 3.13E-04 | 0.001015 | 7.41E-04 | 2.26E-04 | 9.37E-04 | 0.002351 | 6.28E-04 | 6.74E-04 | 5.79E-04 | 2.16E-04 | 6.32E-04 | 8.40E-05 | 9.64E-04 | 2.50E-05 |
| 0.004864 | 9.71E-04 | 9.28E-04 | 0        | 0.001394 | 0.008098 | 1.82E-04 | 0.001567 | 0.004064 | 0.004681 | 7.63E-04 | 9.95E-04 | 0        | 0.005773 | 0.005971 |
| 0        | 3.40E-05 | 0        | 0        | 2.70E-05 | 1.12E-04 | 3.36E-04 | 2.90E-05 | 7.30E-05 | 0        | 0        | 2.30E-05 | 0        | 0        | 0        |
| 0.005872 | 0.003915 | 3.19E-04 | 4.15E-04 | 0        | 2.69E-04 | 3.08E-04 | 6.93E-04 | 2.21E-04 | 0        | 0        | 3.65E-04 | 4.60E-05 | 0        | 6.40E-05 |
| 6.90E-05 | 8.35E-04 | 0.003539 | 0.005015 | 6.86E-04 | 0.005678 | 0.001844 | 0.001805 | 1.92E-04 | 0.001348 | 4.42E-04 | 0.00147  | 0.00688  | 0.001713 | 0.001909 |
| 0        | 0.001315 | 0.001064 | 0.010721 | 0.001797 | 7.28E-04 | 3.40E-05 | 0.004727 | 8.18E-04 | 0.004233 | 0.007987 | 2.90E-05 | 0.00105  | 0.001955 | 0.002176 |
| 0        | 4.23E-04 | 0.004789 | 0.002445 | 4.95E-04 | 8.47E-04 | 8.32E-04 | 0.002195 | 5.52E-04 | 0.001118 | 5.99E-04 | 1.83E-04 | 5.04E-04 | 0.002389 | 9.55E-04 |
| 5.13E-04 | 4.81E-04 | 0.004047 | 4.00E-05 | 0.001241 | 0.008726 | 0.003621 | 0.002525 | 0.002014 | 0.012758 | 0.002388 | 0.001988 | 0        | 0.005133 | 0.001159 |
| 0        | 2.40E-05 | 7.40E-05 | 0        | 3.60E-05 | 1.59E-04 | 4.72E-04 | 0        | 0.001269 | 0        | 8.60E-05 | 0        | 0        | 0        | 3.10E-05 |
| 0.061323 | 1.80E-04 | 2.46E-04 | 3.80E-05 | 0        | 0.001896 | 0        | 0        | 0.010115 | 0        | 4.80E-05 | 0.036347 | 1.33E-04 | 0        | 0        |
| 0        | 1.19E-04 | 0        | 3.20E-05 | 0        | 3.70E-05 | 0.001154 | 0        | 9.00E-05 | 6.30E-05 | 4.00E-05 | 0        | 1.96E-04 | 0        | 2.80E-05 |
| 0.065801 | 2.01E-04 | 1.06E-04 | 3.90E-05 | 0        | 7.09E-04 | 0        | 0        | 0.006515 | 0        | 0        | 0.021469 | 1.73E-04 | 6.60E-05 | 0        |
| 1.12E-04 | 0.001186 | 4.50E-05 | 1.41E-04 | 1.07E-04 | 4.36E-04 | 5.47E-04 | 0.001745 | 6.06E-04 | 0.001061 | 8.30E-05 | 4.20E-05 | 0        | 7.28E-04 | 6.85E-04 |
| 2.50E-05 | 0        | 0        | 0        | 0        | 0        | 5.31E-04 | 0        | 5.37E-04 | 0        | 0        | 5.00E-06 | 0        | 1.38E-04 | 0        |
| 0        | 0        | 0        | 0        | 0.001337 | 0.01233  | 0.024379 | 0        | 2.70E-05 | 0        | 0        | 7.00E-06 | 0        | 0        | 0.002188 |
| 0.035565 | 1.70E-04 | 8.10E-05 | 2.60E-05 | 0        | 9.44E-04 | 0        | 2.60E-05 | 0.00823  | 0        | 0        | 0.017211 | 4.30E-05 | 6.90E-05 | 0        |
| 0        | 4.62E-04 | 0.001595 | 7.50E-04 | 9.34E-04 | 5.01E-04 | 2.15E-04 | 0.002174 | 2.89E-04 | 0.002139 | 7.90E-05 | 1.25E-04 | 5.17E-04 | 0.001309 | 0.003071 |
| 5.13E-04 | 1.86E-04 | 1.74E-04 | 2.29E-04 | 3.44E-04 | 7.41E-04 | 7.36E-04 | 9.30E-05 | 0.012911 | 2.69E-04 | 0        | 4.10E-05 | 3.00E-05 | 3.97E-04 | 1.20E-04 |
| 1.90E-05 | 0        | 0        | 0        | 5.07E-04 | 2.20E-05 | 0.011602 | 0        | 2.80E-05 | 0        | 0        | 0        | 0        | 0        | 6.11E-04 |
| 1.63E-04 | 1.64E-04 | 4.22E-04 | 1.38E-04 | 7.15E-04 | 0.001245 | 3.37E-04 | 1.70E-04 | 0.012251 | 1.71E-04 | 4.06E-04 | 1.20E-05 | 0        | 4.22E-04 | 5.24E-04 |
| 0        | 0        | 0        | 0        | 0        | 8.40E-05 | 0        | 2.90E-05 | 0        | 0        | 0        | 0        | 0        | 0        | 0        |
| 0        | 0        | 0        | 0        | 0        | 0        | 0        | 0        | 0        | 0        | 0        | 7.00E-06 | 0        | 0        | 0        |
| 0.02344  | 0.005784 | 0.008918 | 0.006555 | 0.005658 | 0.012591 | 0.016106 | 0.008945 | 0.02605  | 0.010589 | 0.008256 | 0.014038 | 0.002292 | 0.010174 | 0.012157 |

**Table S3 . The abundance and composition at the phylum level of each sample**

| ID                     | CP04     | CP34     | CP66     | CP70     | CP69     | CP02     | CP49     | CP60     | CP29     | CP05     | CP45     | CP55     | CP32     |
|------------------------|----------|----------|----------|----------|----------|----------|----------|----------|----------|----------|----------|----------|----------|
| Bacteroidetes          | 0.892504 | 0.888262 | 0.824962 | 0.682231 | 0.662904 | 0.63035  | 0.577511 | 0.523223 | 0.424077 | 0.419886 | 0.386482 | 0.365105 | 0.349062 |
| Firmicutes             | 0.022297 | 0.021757 | 0.059502 | 0.093039 | 0.261244 | 0.234242 | 0.250458 | 0.439899 | 0.535923 | 0.152187 | 0.349429 | 0.400232 | 0.081217 |
| Proteobacteria         | 9.32E-04 | 6.94E-04 | 0.001747 | 0.010903 | 0.0015   | 0.001866 | 0.012939 | 0.002288 | 0.003121 | 0.134083 | 0.02506  | 0.087013 | 0.405187 |
| Actinobacteria         | 8.12E-04 | 0.087173 | 0.103397 | 0.014206 | 0.048297 | 0.121108 | 0.109317 | 0.029732 | 0.01519  | 0.177231 | 0.005994 | 0.066175 | 0.016974 |
| Fusobacteria           | 0.083252 | 3.21E-04 | 0.001138 | 0.198962 | 0.018699 | 0.007918 | 0.029162 | 0.001182 | 0.003218 | 0.095395 | 0.224552 | 0.057864 | 0.139674 |
| Bacteria_unclassified  | 2.03E-04 | 0.001509 | 0.003092 | 3.43E-04 | 0.006982 | 0.004453 | 0.00149  | 0.003676 | 0.018471 | 0.021073 | 0.005597 | 0.019284 | 0.007417 |
| Candidate_division_TM7 | 0        | 2.84E-04 | 0.006132 | 1.67E-04 | 2.82E-04 | 6.30E-05 | 0.017396 | 0        | 0        | 0        | 0.002799 | 0.004135 | 4.69E-04 |
| Candidate_division_SR1 | 0        | 0        | 0        | 0        | 9.20E-05 | 0        | 0.001538 | 0        | 0        | 1.45E-04 | 0        | 1.92E-04 | 0        |
| Cyanobacteria          | 0        | 0        | 3.00E-05 | 6.10E-05 | 0        | 0        | 1.51E-04 | 0        | 0        | 0        | 0        | 0        | 0        |
| Tenericutes            | 0        | 0        | 0        | 0        | 0        | 0        | 0        | 0        | 0        | 0        | 2.40E-05 | 0        | 0        |
| Spirochaetae           | 0        | 0        | 0        | 4.80E-05 | 0        | 0        | 2.00E-05 | 0        | 0        | 0        | 6.30E-05 | 0        | 0        |
| Synergistetes          | 0        | 0        | 0        | 2.30E-05 | 0        | 0        | 0        | 0        | 0        | 0        | 0        | 0        | 0        |
| BD1-5                  | 0        | 0        | 0        | 0        | 0        | 0        | 0        | 0        | 0        | 0        | 0        | 0        | 0        |
| Chloroflexi            | 0        | 0        | 0        | 0        | 0        | 0        | 0        | 0        | 0        | 0        | 0        | 0        | 0        |
| Verrucomicrobia        | 0        | 0        | 0        | 1.70E-05 | 0        | 0        | 1.80E-05 | 0        | 0        | 0        | 0        | 0        | 0        |
| Deinococcus-Thermus    | 0        | 0        | 0        | 0        | 0        | 0        | 0        | 0        | 0        | 0        | 0        | 0        | 0        |
| Candidate_division_WS6 | 0        | 0        | 0        | 0        | 0        | 0        | 0        | 0        | 0        | 0        | 0        | 0        | 0        |
| Planctomycetes         | 0        | 0        | 0        | 0        | 0        | 0        | 0        | 0        | 0        | 0        | 0        | 0        | 0        |

| CP20     | CP50     | CP31     | CP53     | CP35     | CP14     | CP03     | CP57     | CP61     | CP36     | CP11     | CP62     | CP68     | CP67     | CP22     |
|----------|----------|----------|----------|----------|----------|----------|----------|----------|----------|----------|----------|----------|----------|----------|
| 0.317877 | 0.311307 | 0.309268 | 0.287934 | 0.271978 | 0.262047 | 0.251744 | 0.238072 | 0.234731 | 0.220567 | 0.205119 | 0.201682 | 0.178325 | 0.174285 | 0.168259 |
| 0.268385 | 0.35528  | 0.25151  | 0.148559 | 0.562451 | 0.275345 | 0.537473 | 0.19588  | 0.220176 | 0.404345 | 0.343971 | 0.254645 | 0.434275 | 0.49127  | 0.413707 |
| 0.020113 | 0.005538 | 0.081774 | 0.384663 | 0.099709 | 0.086251 | 0.007886 | 0.457629 | 0.287129 | 0.005573 | 0.125964 | 0.231559 | 0.007756 | 0.180134 | 0.086873 |
| 0.008869 | 0.31664  | 0.031578 | 0.047498 | 0.063834 | 0.113245 | 0.087082 | 0.077773 | 0.034223 | 0.259865 | 0.277586 | 0.112821 | 0.362919 | 0.0965   | 0.210054 |
| 0.372649 | 0.002867 | 0.318074 | 0.110859 | 5.84E-04 | 0.222939 | 0.099235 | 0.021172 | 0.202821 | 0.096742 | 0.033146 | 0.138002 | 0.00167  | 0.048361 | 0.081878 |
| 0.001486 | 0.008266 | 0.007648 | 0.006723 | 0.001108 | 0.009297 | 0.003749 | 0.007635 | 0.006315 | 0.011067 | 0.012377 | 0.003415 | 0.00163  | 0        | 0.0229   |
| 0.010302 | 0        | 7.50E-05 | 0.012076 | 1.21E-04 | 0.024708 | 0.012091 | 0.001315 | 0.009443 | 0.001416 | 0.001837 | 0.056123 | 0.01223  | 1.01E-04 | 0.007061 |
| 1.82E-04 | 0        | 7.30E-05 | 0.001255 | 0        | 0.006086 | 2.30E-05 | 5.24E-04 | 0.003007 | 0        | 0        | 0.001525 | 2.40E-05 | 0        | 0.009195 |
| 0        | 6.40E-05 | 0        | 0        | 1.35E-04 | 0        | 3.83E-04 | 0        | 0        | 5.00E-05 | 0        | 0        | 1.80E-05 | 0.009085 | 0        |
| 0        | 0        | 0        | 1.38E-04 | 0        | 0        | 0        | 0        | 6.60E-05 | 0        | 0        | 1.81E-04 | 0        | 1.50E-05 | 0        |
| 9.20E-05 | 3.80E-05 | 0        | 0        | 0        | 8.20E-05 | 1.65E-04 | 0        | 0.001808 | 2.65E-04 | 0        | 0        | 1.26E-04 | 1.28E-04 | 7.30E-05 |
| 4.50E-05 | 0        | 0        | 0        | 5.70E-05 | 0        | 1.69E-04 | 0        | 2.02E-04 | 1.10E-04 | 0        | 0        | 8.02E-04 | 1.21E-04 | 0        |
| 0        | 0        | 0        | 2.95E-04 | 2.30E-05 | 0        | 0        | 0        | 3.30E-05 | 0        | 0        | 4.70E-05 | 0        | 0        | 0        |
| 0        | 0        | 0        | 0        | 0        | 0        | 0        | 0        | 0        | 0        | 0        | 0        | 2.25E-04 | 0        | 0        |
| 0        | 0        | 0        | 0        | 0        | 0        | 0        | 0        | 0        | 0        | 0        | 0        | 0        | 0        | 0        |
| 0        | 0        | 0        | 0        | 0        | 0        | 0        | 0        | 0        | 0        | 0        | 0        | 0        | 0        | 0        |
| 0        | 0        | 0        | 0        | 0        | 0        | 0        | 0        | 4.60E-05 | 0        | 0        | 0        | 0        | 0        | 0        |
| 0        | 0        | 0        | 0        | 0        | 0        | 0        | 0        | 0        | 0        | 0        | 0        | 0        | 0        | 0        |

| CP16     | CP10     | CP26     | CP51     | CP48     | CP52     | CP38     | CP37     | CP24     | CP44     | CP18     | CP06     | CP21     | CP46     | CP01     |
|----------|----------|----------|----------|----------|----------|----------|----------|----------|----------|----------|----------|----------|----------|----------|
| 0.139147 | 0.133421 | 0.107223 | 0.106806 | 0.103623 | 0.102317 | 0.091603 | 0.088612 | 0.083188 | 0.081327 | 0.052859 | 0.044534 | 0.041001 | 0.03359  | 0.027059 |
| 0.318724 | 0.061355 | 0.562353 | 0.194769 | 0.119373 | 0.310302 | 0.251377 | 0.680909 | 0.48398  | 0.17087  | 0.525664 | 0.460243 | 0.0318   | 0.132412 | 0.16481  |
| 0.185356 | 0.674335 | 0.216782 | 0.42022  | 0.138749 | 0.007382 | 0.003277 | 0.038877 | 0.03105  | 0.440372 | 0.063506 | 0.212531 | 0.829332 | 0.072517 | 0.001934 |
| 0.08212  | 0.011107 | 0.093565 | 0.050087 | 0.096244 | 0.029975 | 0.630975 | 0.183274 | 0.362393 | 0.06076  | 0.321759 | 0.114162 | 0.020958 | 0.117193 | 0.783857 |
| 0.249296 | 0.098141 | 0.008313 | 0.21993  | 0.534606 | 0.522341 | 7.80E-05 | 0.001935 | 0.013936 | 0.237388 | 0.013966 | 0.158801 | 0.063672 | 0.638919 | 0.007855 |
| 0.012017 | 0.021641 | 0.004155 | 3.20E-05 | 0.006209 | 4.83E-04 | 0.02269  | 0.003251 | 0.009572 | 0.009023 | 0.015594 | 0.008278 | 0.012196 | 0.00451  | 0.01441  |
| 0.01334  | 0        | 0.007609 | 0.006808 | 0.001019 | 0.027171 | 0        | 0        | 0.015762 | 1.36E-04 | 0.005499 | 3.75E-04 | 6.27E-04 | 7.84E-04 | 3.90E-05 |
| 0        | 0        | 0        | 0        | 0        | 0        | 0        | 0        | 2.70E-05 | 0        | 4.38E-04 | 1.10E-04 | 3.38E-04 | 0        | 0        |
| 0        | 0        | 0        | 8.57E-04 | 0        | 2.90E-05 | 0        | 0.003142 | 0        | 0        | 7.10E-05 | 9.66E-04 | 0        | 4.00E-05 | 3.60E-05 |
| 0        | 0        | 0        | 1.49E-04 | 0        | 0        | 0        | 0        | 2.60E-05 | 1.24E-04 | 0        | 0        | 0        | 0        | 0        |
| 0        | 0        | 0        | 2.51E-04 | 1.77E-04 | 0        | 0        | 0        | 0        | 0        | 4.24E-04 | 0        | 7.60E-05 | 0        | 0        |
| 0        | 0        | 0        | 9.10E-05 | 0        | 0        | 0        | 0        | 6.60E-05 | 0        | 2.20E-04 | 0        | 0        | 0        | 0        |
| 0        | 0        | 0        | 0        | 0        | 0        | 0        | 0        | 0        | 0        | 0        | 0        | 0        | 0        | 0        |
| 0        | 0        | 0        | 0        | 0        | 0        | 0        | 0        | 0        | 0        | 0        | 0        | 0        | 0        | 0        |
| 0        | 0        | 0        | 0        | 0        | 0        | 0        | 0        | 0        | 0        | 0        | 0        | 0        | 3.50E-05 | 0        |
| 0        | 0        | 0        | 0        | 0        | 0        | 0        | 0        | 0        | 0        | 0        | 0        | 0        | 0        | 0        |
| 0        | 0        | 0        | 0        | 0        | 0        | 0        | 0        | 0        | 0        | 0        | 0        | 0        | 0        | 0        |
| 0        | 0        | 0        | 0        | 0        | 0        | 0        | 0        | 0        | 0        | 0        | 0        | 0        | 0        | 0        |

| CP07     | CP54     | CP58     | CP65     | CP08     | HC119    | HC121    | HC020    | HC146    | HC041    | HC043    | HC147    | HC080    | HC118    | HC091    |
|----------|----------|----------|----------|----------|----------|----------|----------|----------|----------|----------|----------|----------|----------|----------|
| 0.022926 | 0.020912 | 0.016567 | 0.007138 | 0.003794 | 0.755    | 0.737796 | 0.623708 | 0.59984  | 0.566189 | 0.53599  | 0.531721 | 0.524841 | 0.520299 | 0.514209 |
| 0.474043 | 0.062763 | 0.042499 | 0.012953 | 0.104342 | 0.161888 | 0.166619 | 0.276238 | 0.112984 | 0.227681 | 0.22909  | 0.180511 | 0.214781 | 0.153886 | 0.260224 |
| 0.006241 | 0.845016 | 0.878386 | 0.948538 | 0.058976 | 0.007266 | 0.019149 | 0.03429  | 0.129539 | 0.098509 | 0.034292 | 0.066712 | 0.098919 | 0.126735 | 0.137817 |
| 0.07952  | 0.022029 | 0.007229 | 0.004078 | 0.533925 | 0.048154 | 0.043403 | 0.042435 | 0.036873 | 0.06627  | 0.139538 | 0.029078 | 0.044502 | 0.05366  | 0.058823 |
| 0.380652 | 0.033728 | 0.048407 | 0.025069 | 0.294193 | 0.013521 | 0.018124 | 0.011476 | 0.111221 | 0.025676 | 0.02814  | 0.175167 | 0.097527 | 0.122789 | 0.015582 |
| 0.036618 | 0.012001 | 0.006688 | 0.001993 | 0.004347 | 0.005144 | 0.005929 | 0.005132 | 0.003101 | 0.015079 | 0.004933 | 0.008216 | 0.006304 | 0.014696 | 0.010062 |
| 0        | 0.003259 | 2.24E-04 | 2.31E-04 | 6.70E-05 | 0.008859 | 0.008965 | 0.006721 | 0.006257 | 5.96E-04 | 0.027985 | 0.007264 | 0.008696 | 0.007118 | 0.003201 |
| 0        | 1.45E-04 | 0        | 0        | 0        | 8.30E-05 | 1.50E-05 | 0        | 1.25E-04 | 0        | 0        | 0.001313 | 0.004362 | 8.17E-04 | 0        |
| 0        | 0        | 0        | 0        | 2.27E-04 | 0        | 0        | 0        | 0        | 0        | 0        | 0        | 0        | 0        | 8.20E-05 |
| 0        | 0        | 0        | 0        | 0        | 0        | 0        | 0        | 0        | 0        | 0        | 1.80E-05 | 6.80E-05 | 0        | 0        |
| 0        | 1.47E-04 | 0        | 0        | 0        | 0        | 0        | 0        | 0        | 0        | 0        | 0        | 0        | 0        | 0        |
| 0        | 0        | 0        | 0        | 0        | 5.50E-05 | 0        | 0        | 6.00E-05 | 0        | 0        | 0        | 0        | 0        | 0        |
| 0        | 0        | 0        | 0        | 0        | 3.00E-05 | 0        | 0        | 0        | 0        | 0        | 0        | 0        | 0        | 0        |
| 0        | 0        | 0        | 0        | 0        | 0        | 0        | 0        | 0        | 0        | 0        | 0        | 0        | 0        | 0        |
| 0        | 0        | 0        | 0        | 0        | 0        | 0        | 0        | 0        | 0        | 3.20E-05 | 0        | 0        | 0        | 0        |
| 0        | 0        | 0        | 0        | 1.29E-04 | 0        | 0        | 0        | 0        | 0        | 0        | 0        | 0        | 0        | 0        |
| 0        | 0        | 0        | 0        | 0        | 0        | 0        | 0        | 0        | 0        | 0        | 0        | 0        | 0        | 0        |
| 0        | 0        | 0        | 0        | 0        | 0        | 0        | 0        | 0        | 0        | 0        | 0        | 0        | 0        | 0        |

| HC086    | HC040    | HC138    | HC137    | HC069    | HC115    | HC033    | HC099    | HC074    | HC039    | HC011    | HC005    | HC083    | HC001    | HC092    |
|----------|----------|----------|----------|----------|----------|----------|----------|----------|----------|----------|----------|----------|----------|----------|
| 0.507545 | 0.499527 | 0.497808 | 0.491186 | 0.481706 | 0.479086 | 0.47673  | 0.475109 | 0.46476  | 0.433473 | 0.431453 | 0.428938 | 0.428385 | 0.409506 | 0.406129 |
| 0.216152 | 0.099405 | 0.135557 | 0.180255 | 0.308148 | 0.172536 | 0.302732 | 0.313462 | 0.165076 | 0.240073 | 0.22849  | 0.239296 | 0.314854 | 0.126819 | 0.214472 |
| 0.132278 | 0.092288 | 0.138361 | 0.040162 | 0.030983 | 0.10938  | 0.047624 | 0.084912 | 0.213644 | 0.010461 | 0.162034 | 0.064727 | 0.069143 | 0.317287 | 0.043829 |
| 0.083887 | 0.021169 | 0.03676  | 0.053273 | 0.070671 | 0.029906 | 0.049311 | 0.094609 | 0.089857 | 0.032965 | 0.046924 | 0.213475 | 0.144973 | 0.06625  | 0.260703 |
| 0.038698 | 0.248478 | 0.15583  | 0.21008  | 0.094003 | 0.159374 | 0.059192 | 0.012227 | 0.033244 | 0.251563 | 0.103535 | 0.021347 | 0.016548 | 0.042566 | 0.027235 |
| 0.01387  | 0.005766 | 0.008474 | 0.002782 | 0.005109 | 0.004096 | 0.004854 | 0.018806 | 0.013527 | 0.00392  | 0.003019 | 0.011132 | 0.020538 | 0.010234 | 0.006062 |
| 0.005726 | 0.010791 | 0.015004 | 0.018161 | 0.009346 | 0.045552 | 9.45E-04 | 8.75E-04 | 0.004402 | 0.026939 | 0.012426 | 0.02031  | 0.003634 | 0.010794 | 0.032622 |
| 0.001699 | 0.022559 | 0.011647 | 0.003639 | 0        | 7.00E-05 | 0.058522 | 0        | 0.015407 | 4.73E-04 | 0.012037 | 7.75E-04 | 0.001878 | 0.01632  | 0.008579 |
| 1.45E-04 | 0        | 0        | 0        | 0        | 0        | 0        | 0        | 0        | 3.90E-05 | 0        | 0        | 0        | 0        | 0        |
| 0        | 0        | 5.06E-04 | 4.18E-04 | 0        | 0        | 1.90E-05 | 0        | 4.30E-05 | 0        | 5.70E-05 | 0        | 4.70E-05 | 3.20E-05 | 1.40E-04 |
| 0        | 0        | 5.30E-05 | 4.40E-05 | 0        | 0        | 3.40E-05 | 0        | 0        | 5.00E-05 | 2.50E-05 | 0        | 0        | 0        | 0        |
| 0        | 0        | 0        | 0        | 0        | 0        | 0        | 0        | 0        | 4.40E-05 | 0        | 0        | 0        | 0        | 4.60E-05 |
| 0        | 1.70E-05 | 0        | 0        | 3.40E-05 | 0        | 3.70E-05 | 0        | 4.00E-05 | 0        | 0        | 0        | 0        | 1.92E-04 | 1.83E-04 |
| 0        | 0        | 0        | 0        | 0        | 0        | 0        | 0        | 0        | 0        | 0        | 0        | 0        | 0        | 0        |
| 0        | 0        | 0        | 0        | 0        | 0        | 0        | 0        | 0        | 0        | 0        | 0        | 0        | 0        | 0        |
| 0        | 0        | 0        | 0        | 0        | 0        | 0        | 0        | 0        | 0        | 0        | 0        | 0        | 0        | 0        |
| 0        | 0        | 0        | 0        | 0        | 0        | 0        | 0        | 0        | 0        | 0        | 0        | 0        | 0        | 0        |
| 0        | 0        | 0        | 0        | 0        | 0        | 0        | 0        | 0        | 0        | 0        | 0        | 0        | 0        | 0        |
| 0        | 0        | 0        | 0        | 0        | 0        | 0        | 0        | 0        | 0        | 0        | 0        | 0        | 0        | 0        |

| HC047    | HC030    | HC090    | HC052    | HC126    | HC098    | HC066    | HC141    | HC031    | HC106    | HC067    | HC055    | HC045    | HC009    | HC139    |
|----------|----------|----------|----------|----------|----------|----------|----------|----------|----------|----------|----------|----------|----------|----------|
| 0.400166 | 0.398133 | 0.39342  | 0.386557 | 0.381249 | 0.378477 | 0.374417 | 0.371545 | 0.371497 | 0.36593  | 0.365481 | 0.361213 | 0.354572 | 0.35039  | 0.344407 |
| 0.347908 | 0.162828 | 0.063433 | 0.3076   | 0.134805 | 0.153287 | 0.254195 | 0.072356 | 0.173274 | 0.313893 | 0.247481 | 0.2889   | 0.207527 | 0.150185 | 0.139837 |
| 0.044318 | 0.33375  | 0.305855 | 0.099783 | 0.30968  | 0.049283 | 0.133774 | 0.414104 | 0.314488 | 0.146446 | 0.014381 | 0.190912 | 0.267314 | 0.348291 | 0.251423 |
| 0.116001 | 0.049822 | 0.062505 | 0.15059  | 0.107045 | 0.009727 | 0.073871 | 0.086937 | 0.032408 | 0.113344 | 0.098629 | 0.028849 | 0.086462 | 0.041506 | 0.013344 |
| 0.071123 | 0.042447 | 0.140689 | 0.042785 | 0.0368   | 0.393624 | 0.151018 | 0.037689 | 0.082966 | 0.032613 | 0.246053 | 0.118376 | 0.071039 | 0.101616 | 0.236235 |
| 0.013455 | 0.007151 | 0.008467 | 0.0066   | 0.024    | 0.007384 | 0.004953 | 0.016767 | 0.0078   | 0.019468 | 0.004822 | 0.005831 | 0.00569  | 4.57E-04 | 0.005336 |
| 0.006053 | 0.005452 | 0.016588 | 0.004593 | 6.48E-04 | 0.004934 | 0.006956 | 3.45E-04 | 0.014972 | 0.004198 | 0.023098 | 0.004792 | 0.006356 | 0.005595 | 0.006317 |
| 9.28E-04 | 4.17E-04 | 0.009043 | 0.001321 | 0.005773 | 0.003155 | 3.21E-04 | 2.57E-04 | 0.002328 | 0.004041 | 5.50E-05 | 9.70E-04 | 9.71E-04 | 0.001711 | 0.00296  |
| 0        | 0        | 0        | 1.04E-04 | 0        | 0        | 0        | 0        | 0        | 0        | 0        | 0        | 0        | 0        | 0        |
| 4.80E-05 | 0        | 0        | 0        | 0        | 8.20E-05 | 4.58E-04 | 0        | 1.89E-04 | 0        | 0        | 1.01E-04 | 6.90E-05 | 1.56E-04 | 3.20E-05 |
| 0        | 0        | 0        | 0        | 0        | 0        | 3.70E-05 | 0        | 0        | 0        | 0        | 5.60E-05 | 0        | 0        | 1.09E-04 |
| 0        | 0        | 0        | 1.60E-05 | 0        | 0        | 0        | 0        | 0        | 0        | 0        | 0        | 0        | 0        | 0        |
| 0        | 0        | 0        | 5.10E-05 | 0        | 4.70E-05 | 0        | 0        | 7.80E-05 | 6.70E-05 | 0        | 0        | 0        | 0        | 0        |
| 0        | 0        | 0        | 0        | 0        | 0        | 0        | 0        | 0        | 0        | 0        | 0        | 0        | 0        | 0        |
| 0        | 0        | 0        | 0        | 0        | 0        | 0        | 0        | 0        | 0        | 0        | 0        | 0        | 9.30E-05 | 0        |
| 0        | 0        | 0        | 0        | 0        | 0        | 0        | 0        | 0        | 0        | 0        | 0        | 0        | 0        | 0        |
| 0        | 0        | 0        | 0        | 0        | 0        | 0        | 0        | 0        | 0        | 0        | 0        | 0        | 0        | 0        |
| 0        | 0        | 0        | 0        | 0        | 0        | 0        | 0        | 0        | 0        | 0        | 0        | 0        | 0        | 0        |

| HC136    | HC053    | HC123    | HC097    | HC144    | HC023    | HC142    | HC016    | HC008    | HC150    | HC107    | HC012    | HC004    | HC048    | HC116    |
|----------|----------|----------|----------|----------|----------|----------|----------|----------|----------|----------|----------|----------|----------|----------|
| 0.342826 | 0.339914 | 0.335931 | 0.332615 | 0.331791 | 0.317521 | 0.315064 | 0.30649  | 0.306238 | 0.305415 | 0.302331 | 0.300204 | 0.293346 | 0.293299 | 0.290328 |
| 0.123962 | 0.301398 | 0.338462 | 0.337231 | 0.222927 | 0.254873 | 0.170621 | 0.196597 | 0.38382  | 0.141631 | 0.344579 | 0.152389 | 0.39014  | 0.539575 | 0.105553 |
| 0.280783 | 0.039333 | 0.209424 | 0.231814 | 0.04699  | 0.327221 | 0.307384 | 0.403119 | 0.174371 | 0.336622 | 0.003118 | 0.315955 | 0.054751 | 0.003648 | 0.51415  |
| 0.015614 | 0.226368 | 0.038427 | 0.065664 | 0.316069 | 0.037339 | 0.026003 | 0.037063 | 0.08973  | 0.044668 | 0.280718 | 0.102195 | 0.183712 | 0.12442  | 0.039056 |
| 0.224191 | 0.060923 | 0.063891 | 0.018324 | 0.059216 | 0.046406 | 0.130456 | 0.040204 | 0.040935 | 0.145406 | 0.053011 | 0.103568 | 0.05258  | 0.003331 | 0.039538 |
| 0.004115 | 0.010166 | 0.013808 | 0.010846 | 0.011643 | 0.013687 | 0.008329 | 0.013938 | 0.00267  | 0.019796 | 0.01252  | 0.010744 | 0.02046  | 0.019048 | 0.007108 |
| 0.007631 | 0.021602 | 3.10E-05 | 0.003263 | 0.010839 | 0.001168 | 0.038495 | 0.002175 | 0.001692 | 0.001657 | 0.0033   | 0.007051 | 0.002368 | 0.016679 | 0.002428 |
| 8.78E-04 | 2.73E-04 | 0        | 1.95E-04 | 4.17E-04 | 0.001744 | 0.003235 | 2.93E-04 | 9.60E-05 | 0.004681 | 4.60E-05 | 0.007802 | 0.002643 | 0        | 0.001777 |
| 0        | 0        | 0        | 0        | 0        | 0        | 0        | 0        | 0        | 6.00E-05 | 0        | 0        | 0        | 0        | 0        |
| 0        | 2.30E-05 | 2.60E-05 | 0        | 1.70E-05 | 4.10E-05 | 3.31E-04 | 4.20E-05 | 0        | 2.60E-05 | 8.40E-05 | 6.80E-05 | 0        | 0        | 0        |
| 0        | 0        | 0        | 0        | 0        | 0        | 4.70E-05 | 0        | 2.59E-04 | 2.70E-05 | 4.90E-05 | 0        | 0        | 0        | 2.60E-05 |
| 0        | 0        | 0        | 4.80E-05 | 0        | 0        | 0        | 7.90E-05 | 1.30E-04 | 0        | 2.44E-04 | 0        | 0        | 0        | 0        |
| 0        | 0        | 0        | 0        | 9.10E-05 | 0        | 3.50E-05 | 0        | 0        | 1.10E-05 | 0        | 2.40E-05 | 0        | 0        | 3.60E-05 |
| 0        | 0        | 0        | 0        | 0        | 0        | 0        | 0        | 2.70E-05 | 0        | 0        | 0        | 0        | 0        | 0        |
| 0        | 0        | 0        | 0        | 0        | 0        | 0        | 0        | 3.20E-05 | 0        | 0        | 0        | 0        | 0        | 0        |
| 0        | 0        | 0        | 0        | 0        | 0        | 0        | 0        | 0        | 0        | 0        | 0        | 0        | 0        | 0        |
| 0        | 0        | 0        | 0        | 0        | 0        | 0        | 0        | 0        | 0        | 0        | 0        | 0        | 0        | 0        |
| 0        | 0        | 0        | 0        | 0        | 0        | 0        | 0        | 0        | 0        | 0        | 0        | 0        | 0        | 0        |

| HC071    | HC044    | HC035    | HC025    | HC112    | HC010    | HC049    | HC002    | HC087    | HC075    | HC081    | HC085    | HC145    | HC019    | HC060    |
|----------|----------|----------|----------|----------|----------|----------|----------|----------|----------|----------|----------|----------|----------|----------|
| 0.288407 | 0.282837 | 0.279675 | 0.274143 | 0.273679 | 0.273597 | 0.263756 | 0.256999 | 0.255714 | 0.251411 | 0.249116 | 0.235301 | 0.232111 | 0.222479 | 0.221813 |
| 0.1589   | 0.213016 | 0.258329 | 0.512982 | 0.117583 | 0.22583  | 0.18829  | 0.457165 | 0.198373 | 0.280058 | 0.381458 | 0.444146 | 0.242695 | 0.259755 | 0.56854  |
| 0.400299 | 0.124361 | 0.095978 | 0.038749 | 0.405064 | 0.293294 | 0.352504 | 0.010455 | 0.198905 | 0.173389 | 0.120374 | 0.061647 | 0.028341 | 0.007197 | 0.036377 |
| 0.077904 | 0.235869 | 0.225885 | 0.13441  | 0.043816 | 0.096206 | 0.04676  | 0.235771 | 0.032711 | 0.149968 | 0.088944 | 0.210272 | 0.450882 | 0.392713 | 0.038752 |
| 0.056172 | 0.121007 | 0.104322 | 0.025789 | 0.150747 | 0.091611 | 0.112076 | 0.004062 | 0.299698 | 0.114659 | 0.134631 | 0.029542 | 0.024664 | 0.082234 | 0.06349  |
| 0.011191 | 0.002414 | 0.008936 | 0.013589 | 0.006669 | 0.005181 | 0.021616 | 0.026237 | 0.006212 | 0.00407  | 0.006385 | 0.012461 | 0.016299 | 9.93E-04 | 0.008852 |
| 0.004916 | 0.020437 | 0.023379 | 3.10E-04 | 0.001048 | 0.009734 | 0.006838 | 0.009185 | 0.002362 | 0.024676 | 0.019092 | 0.005839 | 0.00452  | 0.019839 | 0.061806 |
| 0.001899 | 5.90E-05 | 0.003496 | 2.80E-05 | 0.001394 | 0.004504 | 0.00816  | 1.26E-04 | 0.005971 | 0.00159  | 0        | 7.72E-04 | 4.88E-04 | 0.014658 | 1.61E-04 |
| 0        | 0        | 0        | 0        | 0        | 2.30E-05 | 0        | 0        | 0        | 0        | 0        | 0        | 0        | 0        | 0        |
| 2.19E-04 | 0        | 0        | 0        | 0        | 0        | 0        | 0        | 2.50E-05 | 1.36E-04 | 0        | 2.00E-05 | 0        | 0        | 1.26E-04 |
| 0        | 0        | 0        | 0        | 0        | 0        | 0        | 0        | 2.90E-05 | 0        | 0        | 0        | 0        | 2.50E-05 | 2.70E-05 |
| 3.40E-05 | 0        | 0        | 0        | 0        | 0        | 0        | 0        | 0        | 0        | 0        | 0        | 0        | 1.07E-04 | 5.60E-05 |
| 5.90E-05 | 0        | 0        | 0        | 0        | 2.00E-05 | 0        | 0        | 0        | 0        | 0        | 0        | 0        | 0        | 0        |
| 0        | 0        | 0        | 0        | 0        | 0        | 0        | 0        | 0        | 0        | 0        | 0        | 0        | 0        | 0        |
| 0        | 0        | 0        | 0        | 0        | 0        | 0        | 0        | 0        | 4.30E-05 | 0        | 0        | 0        | 0        | 0        |
| 0        | 0        | 0        | 0        | 0        | 0        | 0        | 0        | 0        | 0        | 0        | 0        | 0        | 0        | 0        |
| 0        | 0        | 0        | 0        | 0        | 0        | 0        | 0        | 0        | 0        | 0        | 0        | 0        | 0        | 0        |
| 0        | 0        | 0        | 0        | 0        | 0        | 0        | 0        | 0        | 0        | 0        | 0        | 0        | 0        | 0        |

| HC034    | HC018    | HC109    | HC038    | HC130    | HC029    | HC089    | HC093    | HC042    | HC014    | HC148    | HC133    | HC022    | HC104    | HC131    |
|----------|----------|----------|----------|----------|----------|----------|----------|----------|----------|----------|----------|----------|----------|----------|
| 0.219918 | 0.214097 | 0.210442 | 0.204754 | 0.197833 | 0.195559 | 0.190486 | 0.18515  | 0.182585 | 0.175523 | 0.17509  | 0.170501 | 0.159633 | 0.15587  | 0.154904 |
| 0.208668 | 0.199783 | 0.149025 | 0.232431 | 0.115511 | 0.365406 | 0.399666 | 0.249444 | 0.121462 | 0.482195 | 0.045793 | 0.151317 | 0.210647 | 0.442475 | 0.423327 |
| 0.265677 | 0.297298 | 0.600456 | 0.3029   | 0.570365 | 0.115791 | 0.20523  | 0.134806 | 0.003877 | 0.063618 | 0.626198 | 0.481584 | 0.377484 | 0.226817 | 0.034491 |
| 0.271523 | 0.116416 | 0.023204 | 0.093023 | 0.083704 | 0.067416 | 0.140819 | 0.157631 | 0.646701 | 0.220032 | 0.006506 | 0.061301 | 0.205745 | 0.099991 | 0.338734 |
| 0.028004 | 0.162899 | 0.004433 | 0.142833 | 0.019276 | 0.236163 | 0.03819  | 0.259015 | 0.035078 | 0.037002 | 0.131322 | 0.130182 | 0.031643 | 0.055681 | 0.032478 |
| 0.002896 | 0.003897 | 0.010889 | 0.022577 | 0.009906 | 0.009912 | 0.00711  | 0.003411 | 0.008232 | 0.003849 | 0.008824 | 0.00249  | 0.01443  | 0.01794  | 0.013679 |
| 0.002644 | 0.004944 | 0.00146  | 0.001453 | 0.002594 | 0.006495 | 0.009791 | 0.01027  | 0.002028 | 0.017026 | 0.006267 | 0.001047 | 4.18E-04 | 0.001133 | 0.002327 |
| 5.62E-04 | 4.06E-04 | 4.30E-05 | 1.40E-05 | 7.63E-04 | 0.003155 | 0.008098 | 2.52E-04 | 3.70E-05 | 2.60E-04 | 0        | 0.001489 | 0        | 9.30E-05 | 6.00E-05 |
| 0        | 0        | 0        | 0        | 0        | 0        | 0        | 0        | 0        | 4.60E-05 | 0        | 3.70E-05 | 0        | 0        | 0        |
| 5.70E-05 | 8.00E-05 | 0        | 0        | 4.80E-05 | 4.90E-05 | 1.96E-04 | 0        | 0        | 4.10E-05 | 0        | 5.20E-05 | 0        | 0        | 0        |
| 5.10E-05 | 1.80E-04 | 0        | 0        | 0        | 0        | 2.50E-05 | 0        | 0        | 1.49E-04 | 0        | 0        | 0        | 0        | 0        |
| 0        | 0        | 4.80E-05 | 0        | 0        | 0        | 0        | 2.10E-05 | 0        | 8.20E-05 | 0        | 0        | 0        | 0        | 0        |
| 0        | 0        | 0        | 0        | 0        | 5.40E-05 | 3.39E-04 | 0        | 0        | 4.00E-05 | 0        | 0        | 0        | 0        | 0        |
| 0        | 0        | 0        | 0        | 0        | 0        | 2.50E-05 | 0        | 0        | 1.37E-04 | 0        | 0        | 0        | 0        | 0        |
| 0        | 0        | 0        | 0        | 0        | 0        | 0        | 0        | 0        | 0        | 0        | 0        | 0        | 0        | 0        |
| 0        | 0        | 0        | 0        | 0        | 0        | 2.50E-05 | 0        | 0        | 0        | 0        | 0        | 0        | 0        | 0        |
| 0        | 0        | 0        | 0        | 0        | 0        | 0        | 0        | 0        | 0        | 0        | 0        | 0        | 0        | 0        |
| 0        | 0        | 0        | 1.50E-05 | 0        | 0        | 0        | 0        | 0        | 0        | 0        | 0        | 0        | 0        | 0        |

| HC095    | HC059    | HC101    | HC143    | HC006    | HC027    | HC063    | HC084    | HC125    | HC037    | HC082    | HC135    | HC108    | HC058    | HC110    |
|----------|----------|----------|----------|----------|----------|----------|----------|----------|----------|----------|----------|----------|----------|----------|
| 0.151438 | 0.150525 | 0.135177 | 0.123808 | 0.119627 | 0.117709 | 0.111036 | 0.097106 | 0.090388 | 0.075857 | 0.074396 | 0.051247 | 0.049896 | 0.036343 | 0.013014 |
| 0.444877 | 0.160007 | 0.168759 | 0.327232 | 0.3258   | 0.609708 | 0.346239 | 0.337975 | 0.164874 | 0.15976  | 0.094732 | 0.331685 | 0.420336 | 0.223086 | 0.438753 |
| 0.035659 | 0.502773 | 0.422938 | 0.344116 | 0.213908 | 0.163989 | 0.090564 | 0.076296 | 0.657059 | 0.458357 | 0.697553 | 0.360805 | 0.25856  | 0.582408 | 0.080232 |
| 0.194197 | 0.117929 | 0.082172 | 0.137401 | 0.290272 | 0.077355 | 0.379209 | 0.45627  | 0.01339  | 0.269713 | 0.07738  | 0.167132 | 0.100768 | 0.130179 | 0.443862 |
| 0.142987 | 0.065252 | 0.166451 | 0.04989  | 0.017683 | 0.004614 | 0.033715 | 0.006602 | 0.063752 | 0.033136 | 0.049079 | 0.077359 | 0.157295 | 0.022553 | 0.007464 |
| 0.010321 | 4.51E-04 | 0.018547 | 0.001927 | 0.025504 | 0.020815 | 0.02962  | 0.020866 | 0.00621  | 0.002137 | 6.40E-05 | 0.00327  | 0.001142 | 0.001459 | 0.016595 |
| 0.017635 | 0.002962 | 0.004273 | 0.012792 | 0.007206 | 0.005753 | 0.008685 | 0.004755 | 0.003917 | 7.45E-04 | 0.001813 | 0.007305 | 0.007577 | 0.002959 | 8.00E-05 |
| 0.002793 | 1.01E-04 | 0.001567 | 0.002681 | 0        | 5.70E-05 | 6.31E-04 | 1.00E-04 | 1.37E-04 | 2.59E-04 | 0.004864 | 1.82E-04 | 0.004064 | 9.95E-04 | 0        |
| 0        | 0        | 0        | 0        | 0        | 0        | 0        | 0        | 0        | 0        | 4.30E-05 | 2.41E-04 | 0        | 0        | 0        |
| 2.30E-05 | 0        | 1.16E-04 | 1.53E-04 | 0        | 0        | 2.00E-04 | 0        | 1.72E-04 | 0        | 7.60E-05 | 8.80E-05 | 9.50E-05 | 0        | 0        |
| 1.50E-05 | 0        | 0        | 0        | 0        | 0        | 1.01E-04 | 0        | 0        | 3.60E-05 | 0        | 3.91E-04 | 0        | 0        | 0        |
| 5.50E-05 | 0        | 0        | 0        | 0        | 0        | 0        | 0        | 1.01E-04 | 0        | 0        | 1.66E-04 | 6.80E-05 | 0        | 0        |
| 0        | 0        | 0        | 0        | 0        | 0        | 0        | 3.00E-05 | 0        | 0        | 0        | 1.14E-04 | 1.69E-04 | 0        | 0        |
| 0        | 0        | 0        | 0        | 0        | 0        | 0        | 0        | 0        | 0        | 0        | 1.50E-05 | 0        | 1.80E-05 | 0        |
| 0        | 0        | 0        | 0        | 0        | 0        | 0        | 0        | 0        | 0        | 0        | 0        | 3.00E-05 | 0        | 0        |
| 0        | 0        | 0        | 0        | 0        | 0        | 0        | 0        | 0        | 0        | 0        | 0        | 0        | 0        | 0        |
| 0        | 0        | 0        | 0        | 0        | 0        | 0        | 0        | 0        | 0        | 0        | 0        | 0        | 0        | 0        |
| 0        | 0        | 0        | 0        | 0        | 0        | 0        | 0        | 0        | 0        | 0        | 0        | 0        | 0        | 0        |

Table S4. The different degree of genus level (p value) between the healthy controls (n=100) and CP

| ID                                  | CP-median                | CP-mean     | CP-se      | HC-median                | HC-mean    | HC-se       | p-value    | z-score      | Sig_m<br>ark | q-value  |
|-------------------------------------|--------------------------|-------------|------------|--------------------------|------------|-------------|------------|--------------|--------------|----------|
| Streptococcus                       | 0.0325(0.0105,0.0977)    | 0.070728625 | 0.01317336 | 0.0565(0.0318,0.1143)    | 0.08745003 | 0.008382506 | 0.01685727 | -2.389806021 | *            | 0.031692 |
| Porphyromonas                       | 0.0043(0.0006,0.0399)    | 0.039623021 | 0.01182944 | 0.0375(0.0083,0.1706)    | 0.10017096 | 0.011823194 | 1.49E-06   | -4.813014259 | ***          | 9.98E-06 |
| Fusobacterium                       | 0.0052(0.0003,0.0289)    | 0.029590354 | 0.00782712 | 0.038(0.0194,0.0893)     | 0.06148357 | 0.006440572 | 2.08E-07   | -5.191930346 | ***          | 1.96E-06 |
| Leptotrichia                        | 0.0268(0.0062,0.1184)    | 0.097675125 | 0.02159837 | 0.0091(0.0037,0.0232)    | 0.02378123 | 0.003776631 | 0.00768496 | -2.665606248 | **           | 0.016418 |
| Haemophilus                         | 0.0017(0.0005,0.0112)    | 0.008639417 | 0.0023379  | 0.0244(0.009,0.0553)     | 0.04214685 | 0.004923641 | 8.33E-11   | -6.49446706  | ***          | 1.96E-09 |
| Granulicatella                      | 0.0038(0.0008,0.0201)    | 0.016247875 | 0.00389932 | 0.009(0.0044,0.0189)     | 0.01334473 | 0.001235082 | 0.01253862 | -2.496611588 | *            | 0.024555 |
| Peptostreptococcus                  | 0.0019(0.0006,0.007)     | 0.005723938 | 0.00123612 | 0.0082(0.0044,0.0145)    | 0.01167697 | 0.001405754 | 4.44E-06   | -4.589768073 | ***          | 2.09E-05 |
| Candidate_division_TM7_norank       | 0.0007(<0.0001,0.007)    | 0.005385083 | 0.00142691 | 0.0053(0.002,0.01)       | 0.00833915 | 0.000978151 | 8.91E-05   | -3.918411842 | ***          | 2.20E-04 |
| Family_XIII_incertae_sedis          | 0.0016(0.0003,0.0035)    | 0.002400833 | 0.00036776 | 0.0065(0.0038,0.0104)    | 0.00973409 | 0.001032694 | 5.84E-11   | -6.547832321 | ***          | 1.96E-09 |
| Oribacterium                        | 0.0016(0.0002,0.0057)    | 0.004394333 | 0.00090083 | 0.0063(0.0033,0.0108)    | 0.00826389 | 0.000744655 | 2.93E-06   | -4.675787823 | ***          | 1.53E-05 |
| Gemella                             | 0.0007(0.0001,0.003)     | 0.00498775  | 0.00184905 | 0.0035(0.0014,0.0076)    | 0.00589207 | 0.000733246 | 9.23E-06   | -4.434449823 | ***          | 3.34E-05 |
| Solobacterium                       | 0.0015(0.0003,0.0026)    | 0.003019438 | 0.00075232 | 0.0046(0.0027,0.0077)    | 0.00561629 | 0.000409572 | 9.12E-08   | -5.343469873 | ***          | 1.07E-06 |
| Citrobacter                         | <0.0001(<0.0001,<0.0001) | 5.56E-06    | 4.28E-06   | <0.0001(<0.0001,0.0022)  | 0.00501171 | 0.001683874 | 2.89E-05   | -4.181822194 | ***          | 8.49E-05 |
| Candidate_division_SR1_norank       | <0.0001(<0.0001,0.0001)  | 0.000519146 | 0.00023509 | 0.0008(<0.0001,0.003)    | 0.0029562  | 0.00069101  | 9.63E-09   | -5.737056206 | ***          | 1.51E-07 |
| Megasphaera                         | 0.002(0.0001,0.0058)     | 0.004677146 | 0.00104674 | <0.0001(<0.0001,0.0004)  | 0.0008848  | 0.000267732 | 2.00E-06   | -4.753131609 | ***          | 1.18E-05 |
| Corynebacterium                     | <0.0001(<0.0001,<0.0001) | 0.000884521 | 0.00053781 | <0.0001(<0.0001,0.0003)  | 0.00232314 | 0.001105816 | 7.17E-04   | -3.383175722 | ***          | 0.001604 |
| Lactobacillales_unclassified        | 0.0006(<0.0001,0.0013)   | 0.001956063 | 0.00051997 | 0.0008(0.0003,0.0019)    | 0.00179394 | 0.00022409  | 0.02386527 | -2.259291304 | *            | 0.041543 |
| Pasteurellaceae_unclassified        | 0.0002(<0.0001,0.001)    | 0.001316208 | 0.00043974 | 0.001(0.0004,0.0025)     | 0.00179074 | 0.000216447 | 6.44E-05   | -3.996225689 | ***          | 1.68E-04 |
| Parvimonas                          | <0.0001(<0.0001,0.0002)  | 0.000660771 | 0.00027532 | 0.0005(0.0001,0.0019)    | 0.00187874 | 0.000317837 | 3.60E-07   | -5.08912438  | ***          | 2.82E-06 |
| Selenomonas                         | 0.0003(0.0001,0.0019)    | 0.002371583 | 0.00065423 | 0.0001(<0.0001,0.0004)   | 0.0010424  | 0.00037863  | 0.00859105 | -2.627913046 | **           | 0.017556 |
| Campylobacter                       | 0.0004(0.0001,0.0009)    | 0.002975708 | 0.00145211 | <0.0001(<0.0001,0.0003)  | 0.00032568 | 7.74E-05    | 5.84E-05   | -4.019019827 | ***          | 1.62E-04 |
| Tannerella                          | <0.0001(<0.0001,0.0009)  | 0.000946771 | 0.00028836 | 0.0002(<0.0001,0.0007)   | 0.00092189 | 0.000248727 | 0.02292554 | -2.274673295 | *            | 0.041442 |
| Enterobacteriaceae_unclassified     | <0.0001(<0.0001,<0.0001) | 3.31E-06    | 2.38E-06   | <0.0001(<0.0001,0.0004)  | 0.00122146 | 0.000407004 | 1.71E-05   | -4.299964748 | ***          | 5.73E-05 |
| ASCC02_norank                       | <0.0001(<0.0001,0.0006)  | 0.000691396 | 0.00032246 | 0.0005(0.0002,0.0008)    | 0.0006643  | 7.29E-05    | 9.24E-06   | -4.434242909 | ***          | 3.34E-05 |
| Family_XIII_uncultured              | <0.0001(<0.0001,0.0002)  | 0.000344021 | 0.00018426 | 0.0002(<0.0001,0.0005)   | 0.00045554 | 0.000133901 | 2.02E-05   | -4.262731291 | ***          | 6.33E-05 |
| Lactobacillus                       | <0.0001(<0.0001,<0.0001) | 4.80E-05    | 3.66E-05   | <0.0001(<0.0001,<0.0001) | 0.00044863 | 0.000183341 | 5.66E-04   | -3.447361019 | ***          | 0.00133  |
| Peptostreptococaceae_incertae_sedis | <0.0001(<0.0001,<0.0001) | 0.000109125 | 3.90E-05   | 0.0001(<0.0001,0.0003)   | 0.00034856 | 0.000123996 | 9.22E-06   | -4.434717432 | ***          | 3.34E-05 |

Table S4. The different degree of phylum level (p value) between the healthy controls (n=100) and CP

| ID                     | CP-median                | CP-mean     | CP-se       | HC-median                | HC-mean   | HC-se       | p-value     | z-score      | Sig_ mark | q-value    |
|------------------------|--------------------------|-------------|-------------|--------------------------|-----------|-------------|-------------|--------------|-----------|------------|
| Bacteroidetes          | 0.2034(0.0873,0.3531)    | 0.261820854 | 0.034484245 | 0.3039(0.1973,0.4017)    | 0.3118265 | 0.01524812  | 0.007781266 | -2.661416417 | **        | 0.02801256 |
| Firmicutes             | 0.2531(0.1292,0.4188)    | 0.275504979 | 0.025642041 | 0.2268(0.1614,0.3262)    | 0.2512059 | 0.011821083 | 0.574529054 | -0.561393882 |           | 0.66865782 |
| Proteobacteria         | 0.0771(0.0071,0.2205)    | 0.183942938 | 0.037662484 | 0.1424(0.0599,0.3149)    | 0.2038157 | 0.017243092 | 0.010438185 | -2.560965057 | *         | 0.03131456 |
| Actinobacteria         | 0.0846(0.0299,0.1351)    | 0.135443813 | 0.024134063 | 0.0867(0.0443,0.1524)    | 0.1248639 | 0.011665462 | 0.431727627 | -0.786238753 |           | 0.59777671 |
| Fusobacteria           | 0.0728(0.0125,0.2071)    | 0.128407542 | 0.022473962 | 0.0592(0.0323,0.1303)    | 0.0863693 | 0.007614973 | 0.920349565 | -0.099993401 |           | 0.92034956 |
| Bacteria_unclassified  | 0.0067(0.0032,0.012)     | 0.008394042 | 0.001104946 | 0.0083(0.0049,0.0137)    | 0.0097792 | 0.00066568  | 0.10989043  | -1.59868582  |           | 0.21978086 |
| Candidate_division_TM7 | 0.0007(<0.0001,0.0072)   | 0.005491167 | 0.00144099  | 0.0062(0.0026,0.0108)    | 0.009068  | 0.0010112   | 2.61E-05    | -4.205174863 | ***       | 2.35E-04   |
| Candidate_division_SR1 | <0.0001(<0.0001,0.0001)  | 0.000519146 | 0.000235087 | 0.0008(<0.0001,0.003)    | 0.0029562 | 0.00069101  | 9.63E-09    | -5.737056206 | ***       | 1.73E-07   |
| Cyanobacteria          | <0.0001(<0.0001,<0.0001) | 0.000319688 | 0.000199101 | <0.0001(<0.0001,<0.0001) | 0.0000082 | 3.19257E-06 | 1.29E-04    | -3.828833348 | ***       | 7.73E-04   |
| Tenericutes            | <0.0001(<0.0001,<0.0001) | 1.50625E-05 | 6.11376E-06 | <0.0001(<0.0001,<0.0001) | 5.113E-05 | 9.50438E-06 | 5.03E-04    | -3.479172841 | ***       | 0.00226334 |
| Spirochaetae           | <0.0001(<0.0001,<0.0001) | 8.29792E-05 | 3.8811E-05  | <0.0001(<0.0001,<0.0001) | 1.845E-05 | 5.40382E-06 | 0.048741317 | -1.970847539 | *         | 0.10966796 |
| Synergistetes          | <0.0001(<0.0001,<0.0001) | 3.97083E-05 | 1.79941E-05 | <0.0001(<0.0001,<0.0001) | 0.0000146 | 3.82989E-06 | 0.431035062 | -0.787421676 |           | 0.59777671 |
| BD1-5                  | <0.0001(<0.0001,<0.0001) | 8.29167E-06 | 6.22964E-06 | <0.0001(<0.0001,<0.0001) | 1.798E-05 | 4.88241E-06 | 0.023097916 | -2.271811194 | *         | 0.05939464 |
| Chloroflexi            | <0.0001(<0.0001,<0.0001) | 4.6875E-06  | 4.6875E-06  | <0.0001(<0.0001,<0.0001) | 2.22E-06  | 1.42769E-06 | 0.421881763 | -0.803160863 |           | 0.59777671 |
| Verrucomicrobia        | <0.0001(<0.0001,<0.0001) | 1.45833E-06 | 8.77192E-07 | <0.0001(<0.0001,<0.0001) | 0.0000023 | 1.14226E-06 | 0.79384155  | -0.261325439 |           | 0.84053811 |
| Deinococcus-Thermus    | <0.0001(<0.0001,<0.0001) | 2.6875E-06  | 2.6875E-06  | <0.0001(<0.0001,<0.0001) | 2.5E-07   | 0.00000025  | 0.594362503 | -0.532524897 |           | 0.66865782 |
| Candidate_division_WS6 | <0.0001(<0.0001,<0.0001) | 9.58333E-07 | 9.58333E-07 | <0.0001(<0.0001,<0.0001) | 0         | 0           | 0.153020929 | -1.428941916 |           | 0.27543767 |
| Planctomycetes         | <0.0001(<0.0001,<0.0001) | 0           | 0           | <0.0001(<0.0001,<0.0001) | 1.5E-07   | 0.00000015  | 0.497526624 | -0.678386566 |           | 0.63967709 |

**Table S5. The relative abundance and distribution of the key 45 OTUs**

| CP01                                     | CP44     | CP45     | CP46     | CP48     | CP49     | CP50     | CP51     | CP52     | CP53     | CP55     | CP57     | CP58     | CP60     |
|------------------------------------------|----------|----------|----------|----------|----------|----------|----------|----------|----------|----------|----------|----------|----------|
| OTU186 (Leptotrichia)                    | 0.066187 | 0.006527 | 0.012988 | 0.084173 | 0.102933 | 0.028397 | 0.005904 | 0.003316 | 0.015985 | 0.00067  | 0        | 0.003014 | 0.002404 |
| OTU1673 (Megasphaera)                    | 0        | 0        | 0.000368 | 0.050889 | 0.020049 | 0.077144 | 9.84E-05 | 0        | 0.005262 | 0.000548 | 0.073194 | 0.171734 | 0        |
| OTU1222 (Actinobacteria_unclassified)    | 0        | 0        | 0        | 0.002786 | 0.002488 | 0.005875 | 0        | 0        | 0.000508 | 0        | 0.00385  | 0        | 0        |
| OTU2662 (Actinomyces)                    | 0.395568 | 0.002237 | 0.004251 | 0.14754  | 0.068829 | 0.026569 | 0.208171 | 0.000657 | 0.000916 | 0.000297 | 0.015977 | 0.018787 | 0.004869 |
| OTU1784 (Actinomyces)                    | 0.00409  | 0        | 0.000353 | 0.01144  | 0.002711 | 0.004831 | 0.001502 | 0        | 0        | 0        | 0.001324 | 0.012371 | 0        |
| OTU1417 (Actinomyces)                    | 0.064158 | 0.000861 | 0.005398 | 0.002786 | 0.006418 | 0.07104  | 0.001881 | 0.002119 | 0.000371 | 0.000264 | 0.005481 | 0.034974 | 0        |
| OTU1277 (Actinomyces)                    | 0.332164 | 0.00226  | 0.005075 | 0.04668  | 0.542101 | 0.129384 | 0.015504 | 0.001131 | 0.000904 | 0.00044  | 0.008054 | 0.166703 | 0.002485 |
| OTU756 (Actinomyces)                     | 0.018371 | 0        | 0        | 0        | 0        | 0        | 8.11E-05 | 0        | 0        | 0        | 0        | 0        | 0        |
| OTU688 (Streptococcus)                   | 0.002076 | 0        | 0        | 0        | 0.00694  | 0.001028 | 0        | 0.00025  | 0.000508 | 6.70E-05 | 0.007047 | 0.096755 | 0        |
| OTU2388 (Streptococcus)                  | 0.000519 | 0        | 0.00153  | 0        | 0        | 0        | 0        | 0        | 0        | 0        | 0        | 0.003062 | 0        |
| OTU2409 (Lachnoanaerobaculum)            | 0        | 0.004573 | 0.016842 | 0.002253 | 0        | 0.004145 | 0        | 6.11E-05 | 0.001003 | 0.001201 | 0.009303 | 0        | 0.004828 |
| OTU2015 (Lachnoanaerobaculum)            | 0        | 0.003006 | 0.011003 | 0.002549 | 0        | 0.007262 | 0        | 0.002526 | 0.004037 | 0.001419 | 0.004652 | 0        | 0.009595 |
| OTU2191 (Peptostreptococcus)             | 0.057301 | 0.04153  | 0.276344 | 0.00658  | 0.021318 | 0.036589 | 7.62E-05 | 0.014826 | 0.033172 | 0.018899 | 0.018215 | 0.025276 | 0.016724 |
| OTU126 (Catonella)                       | 0.000598 | 0.018932 | 0.004839 | 0.004772 | 0.004527 | 0.000392 | 0        | 0.001569 | 0.001015 | 0.000938 | 0        | 0        | 0        |
| OTU2466 (Oribacterium)                   | 0        | 0        | 0.001471 | 0.004001 | 0.002736 | 0        | 7.13E-05 | 0        | 0        | 0.000109 | 0.001529 | 0.015603 | 0        |
| OTU648 (Oribacterium)                    | 0.000975 | 0.029569 | 0.058323 | 0.011885 | 0.02281  | 0.003166 | 0        | 0.004548 | 0.041976 | 0.015617 | 0.020265 | 0.03879  | 0.02308  |
| OTU2095 (Oribacterium)                   | 0        | 0.001526 | 0.020005 | 0.001719 | 0.008905 | 0.001126 | 0        | 0.000774 | 0.020728 | 0.003319 | 0.005891 | 0.031571 | 0.006763 |
| OTU1086 (Family_XIII_Incertae_Sedis)     | 0.028894 | 0.014024 | 0.112468 | 0.010581 | 0.030945 | 0.066422 | 8.36E-05 | 0.008531 | 0.0145   | 0.010226 | 0.021188 | 0.009527 | 0.015991 |
| OTU1962 (Candidate_division_TM7_no_rank) | 0.000613 | 0.000786 | 0.040377 | 0.021103 | 0.017636 | 0.282301 | 0        | 0.034492 | 0.326791 | 0.049073 | 0.031321 | 0.03196  | 0.002322 |
| OTU1082 (Solobacterium)                  | 0.002186 | 0.000757 | 0.069781 | 0.038797 | 0.013134 | 0.022309 | 0.001616 | 0.037736 | 0.037592 | 0.00902  | 0.078777 | 0.025787 | 0.009126 |
| OTU779 (Candidatus_Saccharimonas)        | 0        | 0        | 0        | 0        | 0.002537 | 0        | 0        | 0        | 0.009646 | 0.001302 | 0.003197 | 0        | 0        |
| OTU2495 (Ruminococcaceae_uncultured)     | 0        | 0.002312 | 0.000706 | 0        | 0.001493 | 0        | 0        | 0.002185 | 0.012704 | 0.001771 | 0.004698 | 0        | 0        |
| OTU2268 (ASCC02_norank)                  | 0        | 0.005417 | 0.007046 | 0        | 0        | 0        | 0        | 0        | 0.000458 | 0.000666 | 0.011139 | 0        | 0.002322 |
| OTU147 (Bacteria_unclassified)           | 0        | 0.002231 | 0        | 0.006046 | 0.010572 | 0        | 0        | 0        | 0        | 0.000205 | 0.003691 | 0.012517 | 0.002322 |
| OTU2562 (Fusobacterium)                  | 0        | 0.001515 | 0.001339 | 0.003586 | 0.002711 | 0        | 0        | 0        | 0        | 0.000255 | 0.001948 | 0.019079 | 0.012243 |
| OTU2126 (Prevotella)                     | 0.001211 | 0.001532 | 0.002824 | 0        | 0        | 0.006299 | 0        | 0        | 0        | 0.011142 | 0.058344 | 0.038085 | 0.002159 |
| OTU214 (Prevotella)                      | 0.002391 | 0.002318 | 0.006178 | 0.004653 | 0.001393 | 0.002448 | 7.38E-05 | 0        | 0        | 0.000565 | 0.044063 | 0.034366 | 0        |
| OTU1513 (Prevotella)                     | 0.002359 | 0        | 0.021446 | 0.00406  | 0.001144 | 0.009025 | 0        | 0        | 0        | 0.001201 | 0.0125   | 0.006562 | 0        |
| OTU2028 (Porphyromonas)                  | 0        | 0.009105 | 0.000735 | 0        | 0.001294 | 0.010983 | 0        | 0.021422 | 0        | 0.029396 | 0.022279 | 0.00683  | 0.019271 |
| OTU1349 (Porphyromonas)                  | 0        | 0.000757 | 0        | 0        | 0        | 0.00173  | 0        | 0.004227 | 0        | 0.007396 | 0.003253 | 0        | 0.004604 |
| OTU1496 (Porphyromonas)                  | 0.000645 | 0        | 0        | 0        | 0        | 0.002579 | 0        | 0.005063 | 0        | 0.007781 | 0.003449 | 0        | 0.004522 |
| OTU2284 (Porphyromonas)                  | 0.007691 | 0.009041 | 0.003089 | 0.002223 | 0        | 0.047018 | 0        | 0.150017 | 0.050854 | 0.374351 | 0.116539 | 0.003135 | 0.10385  |
| OTU1340 (Porphyromonas)                  | 0        | 0        | 0        | 0        | 0        | 0.000212 | 0        | 0.005878 | 0.00078  | 0.017898 | 0.007858 | 0        | 0.002322 |
| OTU1868 (Prevotella)                     | 0.002359 | 0.006099 | 0.004325 | 0.034114 | 0        | 0.010738 | 0.759847 | 0.030065 | 0.003715 | 0.010678 | 0.03587  | 0.003208 | 0.00933  |
| OTU1721 (Candidate_division_TM7_no_rank) | 0        | 0        | 0        | 0        | 0        | 0        | 0        | 0        | 0        | 0        | 0        | 0        | 0.002241 |
| OTU575 (Fusobacterium)                   | 0.001022 | 0.8217   | 0.233555 | 0.101393 | 0.071814 | 0.00222  | 9.10E-05 | 0.352606 | 0.32611  | 0.341727 | 0.236351 | 0.158877 | 0.646629 |
| OTU1454 (Fusobacterium)                  | 0        | 0.002283 | 0.000309 | 0.002905 | 0        | 0.000457 | 0        | 0.001375 | 0.037209 | 0.009883 | 0.004502 | 0.009114 | 0.002485 |
| OTU4 (Candidate_division_SR1_norank)     | 0        | 0        | 0        | 0        | 0        | 0        | 0        | 0        | 0        | 0.002373 | 0.000503 | 0.012735 | 0        |
| OTU876 (Parvimonas)                      | 0        | 0        | 0.021564 | 0        | 0        | 0.000326 | 0        | 6.62E-05 | 0.004297 | 0.015491 | 0.006525 | 0        | 0        |
| OTU611 (Filifactor)                      | 0.000488 | 0        | 0        | 0        | 0        | 0        | 0        | 0        | 0        | 0.006325 | 0.005183 | 0.003135 | 0.002485 |
| OTU1052 (Gemella)                        | 0.000503 | 0.005347 | 0.019343 | 0.054238 | 0.018681 | 0.009563 | 0.003125 | 0.041215 | 0.000768 | 0.001561 | 0.000503 | 0        | 0.007069 |
| OTU984 (Gemella)                         | 0        | 0.002925 | 0.021902 | 0.024215 | 0.006293 | 0.004374 | 0.001798 | 0.020286 | 0.03342  | 0.000783 | 0.011578 | 0        | 0.002404 |
| OTU1642 (Haemophilus)                    | 0.006889 | 0.000827 | 0.014224 | 0.310196 | 0.007587 | 0.121991 | 7.62E-05 | 0.244695 | 0.014066 | 0.04472  | 0.099956 | 0.006441 | 0.075555 |
| OTU781 (Bergeyella)                      | 0.000739 | 0        | 0        | 0.001838 | 0        | 0.002056 | 0        | 0.008363 | 0.000706 | 0.000423 | 0        | 0        | 0        |

| CP61     | CP62     | CP65     | CP66     | CP67     | CP68     | CP69     | CP70     | CP38     | CP37     | CP54     | CP35     | CP36     | CP03     | CP04     |
|----------|----------|----------|----------|----------|----------|----------|----------|----------|----------|----------|----------|----------|----------|----------|
| 0        | 0.00122  | 0.000768 | 0.003985 | 0.01106  | 0.048731 | 0        | 0        | 0.755253 | 0        | 0.011178 | 0.004973 | 0.000196 | 0.008425 | 0.0455   |
| 0.54247  | 0.000136 | 0.003352 | 0.00268  | 0.091137 | 0        | 0        | 0.486177 | 0        | 0.016104 | 0.004196 | 0        | 0.002009 | 0.088542 | 0.081808 |
| 0.002563 | 0        | 0        | 0        | 0.008143 | 0        | 0        | 0.014065 | 0        | 0.003087 | 0        | 0        | 9.23E-05 | 0.007396 | 0.002832 |
| 0.018916 | 0.000247 | 0.001864 | 0.002267 | 0.063116 | 0.00115  | 0.018576 | 0.010462 | 0        | 0.164504 | 0.000327 | 0.004841 | 0.036946 | 0.214226 | 0.033891 |
| 0        | 0        | 0.000474 | 0        | 0        | 0        | 0.000453 | 0.00175  | 0        | 0.001307 | 0        | 0        | 0.000337 | 0.009056 | 0.003158 |
| 0.020543 | 0        | 0.012403 | 0        | 0.486099 | 0.002076 | 0.059348 | 0.034142 | 0        | 0.016079 | 0        | 0.014228 | 0.004079 | 0.038515 | 0.068717 |
| 0.031446 | 0.000139 | 0.003085 | 0.001512 | 0.036577 | 0.000288 | 0.021406 | 0.020786 | 0        | 0.044869 | 0        | 0.004808 | 0.010063 | 0.024039 | 0.060533 |
| 0.002644 | 0        | 0        | 0        | 0        | 0        | 0.00019  | 0        | 0        | 0.004113 | 0        | 0        | 0        | 0        | 0        |
| 0.270849 | 0.00126  | 0.025183 | 0.002542 | 0.0032   | 0.000723 | 0.781642 | 0        | 0.000734 | 0        | 0.004037 | 0.274578 | 0.000114 | 0        | 0.016872 |
| 0.001912 | 0        | 0.000719 | 0        | 0.000762 | 0        | 0.008243 | 0        | 5.49E-05 | 0        | 0        | 0.01459  | 0        | 0        | 0.000549 |
| 0        | 0.00107  | 0.000747 | 0.002061 | 0.003092 | 0        | 0        | 0        | 0        | 0        | 0.000352 | 0        | 0        | 0.004569 | 0.002431 |
| 0        | 0.00113  | 0.003657 | 0.005634 | 0.001568 | 0.000323 | 0        | 0        | 8.49E-05 | 0        | 0        | 0        | 0        | 0.000631 | 0.000282 |
| 0.002075 | 0.039245 | 0.024109 | 0.001718 | 0.008796 | 0.026214 | 0.058129 | 0.029517 | 0.215618 | 0        | 0.105378 | 0        | 0        | 0.072721 | 0.011282 |
| 0        | 0.016999 | 0.000485 | 0        | 0        | 0.000175 | 0        | 0.00168  | 0        | 0        | 0        | 0        | 0        | 0.0125   | 0.002268 |
| 0        | 0        | 0.001678 | 0        | 0        | 0        | 0        | 0        | 0        | 0        | 0        | 0        | 0        | 0.017728 | 0.021438 |
| 0.002522 | 0.047513 | 0.028305 | 0.008383 | 0.000806 | 0.000133 | 9.31E-05 | 0.003031 | 9.48E-05 | 0        | 0.000344 | 0.005072 | 0.000119 | 0.106475 | 0.252168 |
| 0        | 0.002958 | 0.012016 | 0.003916 | 0        | 0.000119 | 8.50E-05 | 0        | 0        | 0        | 0        | 0.014788 | 0        | 0.042137 | 0.116648 |
| 0.042714 | 0.009901 | 0.013657 | 0.012162 | 0.051773 | 0.000442 | 0.00049  | 0.169392 | 0.000275 | 0        | 0        | 0.009749 | 6.52E-05 | 0.08293  | 0.000845 |
| 0        | 0.01758  | 0.231844 | 0.007833 | 0.133505 | 0.000589 | 0.001105 | 0.004885 | 0.00026  | 0        | 0        | 0.068208 | 0.000549 | 0.014681 | 0.171873 |
| 0        | 0.005563 | 0.035717 | 0.016834 | 0.005661 | 0.049279 | 0.006102 | 0.018171 | 7.99E-05 | 0.001845 | 0.008854 | 0.004841 | 0.000234 | 0.068523 | 0.014603 |
| 0        | 0.003615 | 0.000812 | 0        | 0        | 0        | 9.31E-05 | 0        | 0.00011  | 0        | 0        | 0        | 0        | 0.001784 | 0.005382 |
| 0        | 0.000147 | 0.001951 | 0        | 0        | 0.000463 | 0        | 0        | 0        | 0        | 0        | 0        | 0        | 0        | 0.009325 |
| 0        | 0.001497 | 0.000512 | 0.004672 | 0        | 0        | 0        | 0.001576 | 0        | 0        | 0        | 0.014689 | 0        | 0.000535 | 0        |
| 0        | 0.000369 | 0.00055  | 0.003435 | 0        | 0        | 0        | 0.009943 | 0        | 0        | 0        | 0.004973 | 0        | 0.009879 | 0        |
| 0        | 0.000842 | 0.000251 | 0.003023 | 0        | 0        | 0        | 0.004867 | 0        | 0        | 0        | 0.019432 | 0        | 0.006504 | 0        |
| 0.009885 | 0.00185  | 0.00782  | 0.011268 | 0.015197 | 0        | 0.000377 | 0        | 0.00019  | 0        | 0        | 0        | 0        | 0        | 0        |
| 0.005573 | 0        | 0.001749 | 0.007558 | 0.034661 | 0        | 0        | 0.037346 | 0.000599 | 0        | 0        | 0.01459  | 0        | 0.012664 | 0        |
| 0.016679 | 0.000101 | 0.001253 | 0.001443 | 0.010516 | 0        | 0.001223 | 0.065356 | 0.001747 | 0        | 0        | 0        | 0        | 0.00273  | 0.00252  |
| 0        | 0.070884 | 0.032682 | 0        | 0.002264 | 0.089824 | 0.002883 | 0        | 0.000504 | 0.146298 | 0        | 0        | 0.155306 | 0        | 0.002046 |
| 0        | 0.010469 | 0.004572 | 0        | 0        | 0.020125 | 0.000688 | 0        | 0        | 0.02677  | 0        | 0        | 0.045228 | 0        | 0.000133 |
| 0        | 0.017604 | 0.006545 | 0.001305 | 0.002591 | 0.015797 | 0.000741 | 0.00175  | 0        | 0.001183 | 0        | 0        | 0.006468 | 0        | 0        |
| 0        | 0.270061 | 0.211806 | 0.014017 | 0.007947 | 0.360887 | 0.010333 | 0.001715 | 0.001013 | 0.449604 | 0        | 0.06722  | 0.703649 | 0.002182 | 0.005174 |
| 0        | 0.008258 | 0.007586 | 0.001718 | 0        | 0.008698 | 0.000109 | 0        | 0        | 0.022112 | 0        | 0        | 0.030364 | 0        | 0        |
| 0        | 0.003767 | 0.018403 | 0.013536 | 0.010625 | 0.144132 | 0.0003   | 0.003205 | 0.000854 | 0.10148  | 0        | 0.029378 | 0.000109 | 0.015807 | 0        |
| 0        | 9.78E-05 | 0.069837 | 0        | 0        | 0        | 0        | 0        | 0        | 0        | 0        | 0.02918  | 0        | 0        | 0        |
| 0.007648 | 0.353671 | 0.192509 | 0.745774 | 0.005421 | 0.147478 | 0.000899 | 0.073324 | 0.004728 | 0.000645 | 0        | 0.131838 | 0.001722 | 0.068756 | 0.007783 |
| 0.002604 | 0.011403 | 0.002114 | 0.001443 | 0.000718 | 0.000323 | 0.000292 | 0        | 0.0003   | 0        | 0        | 0        | 0.00019  | 0        | 0        |
| 0        | 0.005984 | 0.00248  | 0        | 0        | 0        | 0        | 0        | 0        | 0        | 0        | 0        | 0        | 0        | 0        |
| 0        | 0.014225 | 0.000845 | 0        | 0        | 0        | 0.010442 | 0        | 5.49E-05 | 0        | 0        | 0        | 0        | 0.001948 | 0        |
| 0        | 0.007486 | 0        | 0        | 0        | 0        | 0.000211 | 0        | 7.49E-05 | 0        | 0        | 0        | 0        | 0        | 0.000267 |
| 0.011716 | 0.007986 | 0.001995 | 0        | 0        | 0        | 0.004373 | 0.001663 | 0.000754 | 0        | 0.135095 | 0        | 0.00025  | 0.038474 | 0.006746 |
| 0        | 0.005028 | 0.004223 | 0        | 0        | 0.003535 | 0.001603 | 0.003707 | 0.016164 | 0        | 0.462668 | 0        | 0.000619 | 0.01202  | 0.04799  |
| 0.007241 | 0.054586 | 0.028485 | 0.116875 | 0.004768 | 0.078495 | 0.009329 | 0.00149  | 7.49E-05 | 0        | 0.267571 | 0.268024 | 0.001211 | 0.013625 | 0.004937 |
| 0        | 0.005109 | 0.000954 | 0.002405 | 0        | 0        | 0.000243 | 0        | 0.000379 | 0        | 0        | 0        | 8.15E-05 | 0        | 0        |

| CP05     | CP06     | CP07     | CP08     | CP10     | CP11     | CP14     | CP16     | CP02     | CP20     | CP21     | CP22     | CP24     | CP26     | CP29     |
|----------|----------|----------|----------|----------|----------|----------|----------|----------|----------|----------|----------|----------|----------|----------|
| 0.748605 | 0.000378 | 0.090654 | 0.125094 | 0.150695 | 0.000625 | 0.002812 | 0        | 0.005746 | 0.008801 | 0.002702 | 0.000698 | 0.000265 | 0.000433 | 0.001283 |
| 0        | 0        | 0.002913 | 0.01488  | 0        | 0        | 0        | 0.004758 | 0.137486 | 0.115687 | 0.008401 | 0.000686 | 0.000249 | 0.000187 | 0.006013 |
| 0        | 0        | 0.000339 | 0.001524 | 0        | 0        | 0        | 0.000468 | 0.002518 | 0.00268  | 0        | 0        | 0        | 0.000194 | 0.001154 |
| 0.000635 | 0.007274 | 0.052102 | 0.008405 | 0.000799 | 0.00122  | 0.026801 | 0.007158 | 0.010285 | 0.007642 | 0        | 0.003581 | 0.010589 | 0.036432 | 0.003372 |
| 0        | 0.000181 | 0.000795 | 0.000989 | 0.007679 | 0        | 0.000776 | 0.000112 | 0.003167 | 0.011192 | 0        | 0        | 0.001022 | 0.000181 | 0        |
| 0        | 0.006287 | 0.002503 | 0.002025 | 0.480706 | 0.000537 | 0.012542 | 0.007386 | 0.007269 | 0.116122 | 0.000714 | 0.003721 | 0.027129 | 0.017867 | 0.004323 |
| 0        | 0.0188   | 0.00526  | 0.033791 | 0.247436 | 0.003083 | 0.019564 | 0.00385  | 0.040882 | 0.090586 | 0        | 0.004255 | 0.021544 | 0.035244 | 0.00338  |
| 0        | 0.00153  | 0.000899 | 0        | 0.008958 | 0        | 0.000293 | 0.000234 | 0        | 0.035604 | 0        | 0        | 0.00225  | 0.000904 | 0.001388 |
| 0        | 0.000829 | 0.005938 | 0        | 7.06E-05 | 0.008069 | 0.003226 | 0.057435 | 0.007012 | 0.002354 | 0.332955 | 0.003197 | 0.030139 | 0.008223 | 0.483557 |
| 0        | 0        | 0        | 0        | 0.000271 | 0        | 0        | 0.001713 | 0.001101 | 0        | 0.005932 | 0        | 0.001332 | 0.000691 | 0.012268 |
| 0        | 0.000681 | 0.000723 | 0.001937 | 0        | 0.000648 | 0.003131 | 0.0029   | 0.007254 | 0.109059 | 0.00368  | 0.001442 | 0.001612 | 0.000388 | 0.002392 |
| 0        | 0.000471 | 0.00161  | 0.000989 | 5.08E-05 | 0.000701 | 0.003994 | 0.001928 | 0.002413 | 0.057228 | 0.004658 | 0        | 0.001284 | 0.000807 | 0.000249 |
| 0.220694 | 0.067194 | 0.052695 | 0.005828 | 0.000183 | 0.018988 | 0.126136 | 0.00376  | 0.007947 | 0.032417 | 0.005575 | 0.011162 | 0.056362 | 0.018158 | 0.049591 |
| 0        | 0        | 0.003741 | 0.003464 | 0.000161 | 0.001839 | 0.003123 | 0.002442 | 0.001191 | 0.002644 | 0.009363 | 0.002732 | 0.003534 | 0.002552 | 0.013739 |
| 0        | 0        | 0.00219  | 0        | 0        | 0        | 0.000604 | 0.000812 | 0.013964 | 0.002898 | 0.002283 | 0        | 0.001287 | 0        | 0.00553  |
| 0.001214 | 0        | 0.094779 | 0.00045  | 3.95E-05 | 0.011899 | 0.041577 | 0.035189 | 0.022696 | 0.112282 | 0.071616 | 0.007418 | 0.026352 | 0.021207 | 0.108137 |
| 0.000657 | 0        | 0.008962 | 0        | 5.08E-05 | 0.001209 | 0.003226 | 0.011649 | 0.021067 | 0.036546 | 0.020854 | 0.001477 | 0.001505 | 0.001537 | 0.026391 |
| 0        | 0.000691 | 0.01488  | 0.010915 | 0        | 0.005261 | 0.010446 | 0.00343  | 0.043989 | 0.100076 | 0.020218 | 0.006302 | 0.012031 | 0.006182 | 0.04274  |
| 0        | 0        | 0.002268 | 0        | 9.60E-05 | 0        | 0.012861 | 0.076829 | 0.196646 | 0        | 0.14671  | 0.004407 | 0.020064 | 0.097386 | 0.05494  |
| 0.000624 | 0.003594 | 0.010656 | 0.000454 | 0.000277 | 0        | 0.19567  | 0.073095 | 0.036479 | 0.008186 | 0.028743 | 0.00236  | 0.003408 | 0.012887 | 0.050737 |
| 0        | 0        | 0        | 0        | 0        | 0        | 0.002985 | 0.000982 | 0.002262 | 0        | 0.001382 | 0        | 0.000252 | 0.000607 | 0.001599 |
| 0        | 0        | 0        | 0.000972 | 7.34E-05 | 0.001757 | 0.000681 | 0.001171 | 0.004569 | 0.002825 | 0.10643  | 0        | 0.001783 | 0.00095  | 0.015346 |
| 0        | 0        | 9.78E-05 | 0.043209 | 0        | 0.004181 | 0.004201 | 0.001697 | 0.010813 | 0.003187 | 0        | 0.002    | 0.007926 | 0.000891 | 0        |
| 0        | 0        | 0        | 0.026902 | 0        | 0.003054 | 0.003752 | 0.003061 | 0.012622 | 0        | 0        | 0.00686  | 0.002865 | 0.000297 | 0        |
| 0        | 0        | 0        | 0.014863 | 0        | 0.002995 | 0.002631 | 0.001758 | 0.005567 | 0.005759 | 0        | 0.004941 | 0.004695 | 0.000213 | 0        |
| 0.002206 | 0.023428 | 0.000476 | 0        | 0        | 0.028861 | 0.022522 | 0.000613 | 0.006816 | 0        | 0.001506 | 0.007685 | 0.003146 | 0.001608 | 0        |
| 0.000535 | 0.002351 | 0        | 0        | 0        | 0.010066 | 0.013439 | 0.002332 | 0.00573  | 0.016335 | 0.000652 | 0.002883 | 0        | 0.000614 | 0.000671 |
| 0.015496 | 0.000352 | 9.78E-05 | 0        | 0        | 0.001238 | 0.00898  | 0.000642 | 0.004268 | 0.065015 | 0.000621 | 0.000605 | 0.000984 | 0.000937 | 0.000226 |
| 0        | 0.161646 | 0.005357 | 0        | 0        | 0.065184 | 0.020443 | 0.001299 | 0        | 0.00297  | 0.001832 | 0.047507 | 0.116658 | 0.048428 | 0.008691 |
| 0.000512 | 0.040954 | 0.002073 | 0        | 0        | 0.009996 | 0.004822 | 0.000125 | 0        | 0        | 0        | 0.014161 | 0.027356 | 0.018184 | 0.001079 |
| 0        | 0.003118 | 0.000182 | 0        | 0        | 0.006674 | 0.004485 | 0.001338 | 0.002292 | 0        | 0.001957 | 0.004918 | 0.005294 | 0.006983 | 0.001765 |
| 0.001125 | 0.621334 | 0.024089 | 0.001517 | 0.000189 | 0.266779 | 0.157397 | 0.017819 | 0.012125 | 0.011844 | 0.011305 | 0.208676 | 0.217418 | 0.342891 | 0.01896  |
| 0        | 0.008331 | 0.000717 | 0        | 0        | 0.01281  | 0.004623 | 0.000821 | 0        | 0        | 0        | 0.008639 | 0.002796 | 0.009063 | 0.000649 |
| 0.001381 | 0.003801 | 0.003467 | 0        | 0.000119 | 0.013546 | 0.030139 | 0.054727 | 0.01128  | 0        | 0.012547 | 0.006104 | 0.006039 | 0.0129   | 0.033807 |
| 0        | 0        | 0        | 0        | 0        | 0        | 0        | 0        | 0        | 0.002282 | 0.007857 | 0.002186 | 0        | 0        | 0        |
| 0.003364 | 0        | 0.007925 | 0.696782 | 0.001011 | 0.442193 | 0.137298 | 0.569102 | 0.312492 | 0.037778 | 0.108356 | 0.582951 | 0.190204 | 0.040651 | 0.00458  |
| 0        | 0        | 0.000502 | 0.000999 | 0.000251 | 0.001033 | 0        | 0.017158 | 0.027205 | 0        | 0.047873 | 0.003523 | 0.004118 | 0.006925 | 0.001864 |
| 0        | 0        | 0.000137 | 0        | 0        | 0        | 0        | 0.010584 | 0        | 0        | 0.002826 | 0.003267 | 0.026412 | 0        | 0        |
| 0        | 0.000518 | 0.001851 | 0.000501 | 0        | 0        | 0        | 0.0017   | 0        | 0        | 0.001429 | 0.000802 | 0.029328 | 0.006356 | 0        |
| 0        | 0        | 0.000463 | 0        | 0        | 0.000578 | 0        | 0.000632 | 0        | 0        | 0        | 0        | 0.008393 | 0.005071 | 0        |
| 0.000557 | 0        | 0.002711 | 0.001514 | 4.52E-05 | 0.000636 | 0.042819 | 0.007661 | 0.004826 | 0        | 0.005311 | 0.000732 | 0.042659 | 0.094821 | 0.015414 |
| 0.001248 | 0.000158 | 0.000593 | 0        | 0        | 0.000578 | 0.021832 | 0.004899 | 0.001161 | 0        | 0.00736  | 0.000663 | 0.052591 | 0.060475 | 0.006873 |
| 0.001147 | 0.025909 | 0.585955 | 0.001995 | 0.10084  | 0.073761 | 0.049918 | 0.003975 | 0.006756 | 0        | 0.013929 | 0.037461 | 0.026646 | 0.078149 | 0.016666 |
| 0        | 0.000186 | 0.009398 | 0        | 0        | 0        | 0.00025  | 0.000754 | 0        | 0        | 0.002422 | 0        | 0.00048  | 0.001524 | 0.000626 |

| CP31     | CP32     | CP34     | CP18     | HC109    | HC097    | HC098    | HC099    | HC108    | HC104    | HC106    | HC107    | HC095    | HC101    | HC093    |
|----------|----------|----------|----------|----------|----------|----------|----------|----------|----------|----------|----------|----------|----------|----------|
| 0.002895 | 0.008431 | 0.007407 | 0.002784 | 0.001883 | 0        | 0        | 0        | 0        | 0.001845 | 0        | 0        | 0.000234 | 0.000916 | 0.00012  |
| 0.005118 | 0.168445 | 0.064988 | 0.061209 | 0        | 0.031305 | 0        | 0        | 0        | 5.85E-05 | 0.000312 | 0        | 0.000212 | 4.95E-05 | 8.71E-05 |
| 0        | 0.002064 | 0.007502 | 0.018916 | 0        | 0        | 0        | 0        | 0        | 0        | 0        | 0        | 0        | 0        | 0        |
| 0        | 0.012529 | 0.014766 | 0.120443 | 0.027979 | 0.004625 | 0.004007 | 0.000938 | 0.010158 | 0.012914 | 0.01206  | 0.003438 | 0.026739 | 0.016192 | 0.007042 |
| 0        | 0        | 0        | 0.005208 | 0        | 0.001469 | 0.00019  | 0.000104 | 0.001865 | 0.000666 | 0.003599 | 0.00099  | 0.000182 | 0.00068  | 0.001289 |
| 0        | 0.002123 | 0        | 0.593774 | 0.003553 | 0.020553 | 0.003396 | 0.000182 | 0.027924 | 0.041534 | 0.008897 | 0.008019 | 0.090676 | 0.008279 | 0.01858  |
| 0        | 0.006721 | 0.02179  | 0.096438 | 0.020219 | 0.023091 | 0.006737 | 0.000702 | 0.026365 | 0.015241 | 0.027066 | 0.00588  | 0.043552 | 0.016064 | 0.018379 |
| 0        | 0        | 0        | 0        | 0.002566 | 0        | 0.000232 | 0        | 0.00131  | 0.000165 | 0.000282 | 0.000394 | 0.001717 | 0.000367 | 0.000309 |
| 0.00014  | 0.41109  | 0.0151   | 0.001616 | 0.023461 | 0.086686 | 0.015589 | 0.007762 | 0.484918 | 0.008163 | 0.014332 | 0.077319 | 0.417075 | 0.061941 | 0.000889 |
| 0        | 0.011409 | 0.007359 | 0        | 0.000843 | 0.005226 | 0.000596 | 0.000308 | 0.020552 | 0.000531 | 0.001628 | 0.005421 | 0.018474 | 0.002541 | 0        |
| 0        | 0.008284 | 0.007407 | 0        | 0.000486 | 0.002287 | 0.002389 | 0.001088 | 0.00156  | 0.000823 | 0.001868 | 0.001615 | 0.000346 | 0.001272 | 0.002463 |
| 0.00013  | 0.002152 | 0        | 0        | 0        | 0        | 0.000438 | 0.000314 | 0.000486 | 0.000975 | 0.000225 | 0.000283 | 0        | 0.000313 | 0.001069 |
| 0.001567 | 0.012971 | 0.036508 | 0.001766 | 0.091467 | 0.092881 | 0.11327  | 0.009438 | 0.008413 | 0.213301 | 0.023242 | 0.011253 | 0.090361 | 0.052181 | 0.018451 |
| 0        | 0.004746 | 0.007502 | 0        | 0.001306 | 0.00172  | 0.00084  | 0.000623 | 0        | 0.010427 | 0.001412 | 0.000359 | 0.001198 | 0.002291 | 0.001045 |
| 0        | 0.004068 | 0.022937 | 0        | 0.00205  | 0.00212  | 0.000821 | 0.000149 | 0.000993 | 0.000553 | 0.003234 | 0.000194 | 0.004771 | 0.000704 | 0.000207 |
| 0        | 0.037763 | 0.075787 | 0        | 0.024539 | 0.016513 | 0.015635 | 0.008638 | 0.008019 | 0.088113 | 0.022197 | 0.019433 | 0.02154  | 0.040819 | 0.019689 |
| 0        | 0.03057  | 0.110862 | 0        | 0.004578 | 0.005159 | 0.005045 | 0.001483 | 0.002315 | 0.019896 | 0.004617 | 0.001647 | 0.01016  | 0.004733 | 0.001439 |
| 0        | 0.060462 | 0.096908 | 0.04328  | 0.047658 | 0.091846 | 0.115051 | 0.000441 | 0.017204 | 0.0413   | 0.020599 | 0.005934 | 0.081238 | 0.058201 | 0.003521 |
| 0        | 0.002211 | 0.022411 | 0.0085   | 0.038137 | 0.020303 | 0.006153 | 0.001025 | 0.002766 | 0.008347 | 0.001935 | 0.003417 | 0.002664 | 0.03249  | 0.008901 |
| 0.003288 | 0.017157 | 0.029006 | 0        | 0.011412 | 0.035513 | 0.004813 | 0.002404 | 0.006508 | 0.01343  | 0.001866 | 0.002537 | 0.053638 | 0.027379 | 0.015077 |
| 0        | 0        | 0        | 0        | 0        | 0.002788 | 0.0034   | 0.000226 | 0        | 0.002654 | 0.000452 | 0.002844 | 0.006895 | 0.001722 | 0.001142 |
| 0        | 0.002447 | 0        | 0        | 0.002323 | 0.003489 | 0.000395 | 0        | 0        | 0.001029 | 0        | 0.000353 | 0.00503  | 0.001733 | 0.000646 |
| 0        | 0        | 0        | 0        | 0.002604 | 0.00162  | 0.001316 | 0.003339 | 0.002733 | 0.000295 | 0.000676 | 0.001049 | 0.001951 | 0.002284 | 0.003004 |
| 0        | 0.006603 | 0        | 0        | 0.001359 | 0.001002 | 0.000178 | 0.00085  | 0.00045  | 0.000107 | 0.002712 | 0.000141 | 0.000402 | 0.00074  | 0.002439 |
| 0        | 0        | 0        | 0        | 0.000843 | 0.000835 | 0.000194 | 0.000819 | 0.001057 | 0.000281 | 0.002914 | 0.00027  | 0.001492 | 0.001366 | 0.002571 |
| 0.014138 | 0.030924 | 0.133129 | 0.002873 | 0.002164 | 0.082362 | 0.014775 | 0.002872 | 0.061119 | 0.000119 | 0.009951 | 0.021598 | 0.001544 | 0.001461 | 0.004488 |
| 0.002951 | 0.033253 | 0.022698 | 0.008111 | 0        | 0.025328 | 0.038081 | 0.003064 | 0.025858 | 4.84E-05 | 0.000254 | 0.002648 | 0.002409 | 0.000641 | 0.000159 |
| 0.000135 | 0.003714 | 0        | 0.027986 | 0.000972 | 0.019251 | 0.004561 | 0.000326 | 0.003385 | 4.84E-05 | 0.001822 | 0.002331 | 0.0026   | 0.000225 | 0.000568 |
| 0.222624 | 0        | 0        | 0        | 0.063109 | 0.029586 | 0.027359 | 0.052017 | 0.026485 | 0.004238 | 0.016005 | 0.055048 | 0.000346 | 0.042187 | 0.013401 |
| 0.037359 | 0        | 0.007454 | 0        | 0.017615 | 0.001402 | 0.007701 | 0.013496 | 0.00373  | 0.000805 | 0.003636 | 0.008944 | 0        | 0.012904 | 0.00128  |
| 0.031003 | 0.002064 | 0.007646 | 0        | 0.00823  | 0.008715 | 0.004097 | 0.00347  | 0.008477 | 0.000835 | 0.002611 | 0.015107 | 0.001583 | 0.005239 | 0.007252 |
| 0.636114 | 0.015093 | 0.066708 | 0.000688 | 0.201157 | 0.262814 | 0.126706 | 0.232049 | 0.141078 | 0.035224 | 0.190401 | 0.441092 | 0.002959 | 0.16243  | 0.271474 |
| 0.020772 | 0.001975 | 0.008028 | 0        | 0.004631 | 0.008081 | 0.002668 | 0.008824 | 0.00203  | 0.001903 | 0.013316 | 0.016841 | 0.000199 | 0.002307 | 0.007759 |
| 0.016788 | 0.015123 | 0        | 0.004939 | 0.005383 | 0.036331 | 0.160896 | 0.106176 | 0.018876 | 0.007305 | 0.006776 | 0.009582 | 0.00766  | 0.023704 | 0.005341 |
| 0        | 0        | 0        | 0        | 0        | 0.000668 | 0.001882 | 0.004911 | 0.000752 | 9.08E-05 | 0.000211 | 0.00212  | 0.001566 | 0.003254 | 0.002085 |
| 0        | 0.055009 | 0.162326 | 0        | 0.034637 | 0.024827 | 0.048709 | 0.459874 | 0.030192 | 0.24427  | 0.096069 | 0.060247 | 0.045853 | 0.260437 | 0.428192 |
| 0        | 0.002064 | 0        | 0        | 0.01274  | 0.00394  | 0.008108 | 0.003698 | 0.00035  | 0.004268 | 0.000385 | 0.002181 | 0.010554 | 0.019392 | 0.002385 |
| 0        | 0.002152 | 0        | 0        | 0.000881 | 0.000718 | 0.000267 | 0.001661 | 0        | 0.001596 | 0.000213 | 0.007105 | 0        | 0.003063 | 0.004707 |
| 0        | 0        | 0        | 0        | 0.015398 | 0.00384  | 0.001406 | 0.006617 | 0        | 0.004018 | 0.000896 | 0.010622 | 0.001254 | 0.02782  | 0.007264 |
| 0        | 0        | 0        | 0        | 0.032246 | 0.001486 | 0.006153 | 0.001143 | 0        | 0.008131 | 0        | 0.000187 | 0.013287 | 4.05E-05 | 0.002172 |
| 0        | 0.004599 | 0.007407 | 0        | 0.130243 | 0.000935 | 0.021842 | 0.004838 | 0.004627 | 0.01455  | 0.014183 | 0.00637  | 0.016536 | 0.057371 | 0.003392 |
| 0        | 0.006427 | 0        | 0        | 0.117821 | 0.001586 | 0.007121 | 0.001655 | 0.001447 | 0.00982  | 0.010481 | 0.002542 | 0.006185 | 0.023832 | 0.003614 |
| 0.004977 | 0.015359 | 0.036365 | 0.001467 | 0.043505 | 0.037099 | 0.216872 | 0.051797 | 0.045997 | 0.178913 | 0.476667 | 0.182593 | 0.004715 | 0.01655  | 0.105262 |
| 0        | 0        | 0        | 0        | 0        | 0        | 0.000112 | 0.000676 | 0        | 0.001168 | 0        | 5.22E-05 | 0.000203 | 0.001888 | 0.000844 |

| HC087    | HC091    | HC090    | HC089    | HC086    | HC085    | HC084    | HC083    | HC082    | HC081    | HC092    | HC110    | HC147    | HC115    | HC080    |
|----------|----------|----------|----------|----------|----------|----------|----------|----------|----------|----------|----------|----------|----------|----------|
| 0.002493 | 0.000141 | 0.000265 | 0.002791 | 0.00106  | 0.000224 | 5.64E-05 | 0        | 0        | 0.000678 | 0.003911 | 0.00121  | 0.000923 | 5.99E-05 | 0.003417 |
| 0        | 0        | 0.00486  | 9.99E-05 | 0.000244 | 0        | 0        | 0        | 4.93E-05 | 0        | 0.06091  | 0.0003   | 0        | 0        | 0.006929 |
| 0        | 0        | 0        | 0        | 0        | 0        | 0        | 0        | 0        | 0        | 0.001454 | 0.000153 | 0        | 0        | 0.000103 |
| 0.010385 | 0.002217 | 0.015912 | 0.006382 | 0.016208 | 0.00099  | 0.019072 | 0.033636 | 0.006527 | 0.026784 | 0.019377 | 0.026402 | 0.093938 | 0.002326 | 0.013044 |
| 0.000573 | 7.44E-05 | 0.010355 | 0.000464 | 9.49E-05 | 0.000452 | 0.001361 | 0.007558 | 0.00164  | 0.00017  | 0.005584 | 0.002478 | 0.002636 | 0        | 0.003512 |
| 0.067153 | 0.000915 | 0.090339 | 0.014928 | 0.002616 | 0.01238  | 0.053231 | 0.221758 | 0.003499 | 0.019684 | 0.014771 | 0.055209 | 0.048763 | 0.000315 | 0.031743 |
| 0.063473 | 0.000278 | 0.031745 | 0.007932 | 0.004052 | 0.019957 | 0.106576 | 0.120983 | 0.050544 | 0.010726 | 0.022028 | 0.086389 | 0.063467 | 0.001428 | 0.030169 |
| 0.000369 | 0        | 0.001164 | 0.000393 | 0.000146 | 0.000735 | 0.001533 | 0.004011 | 0.00057  | 0        | 0.001647 | 0.001242 | 0.004616 | 5.14E-05 | 0.000641 |
| 0.026613 | 4.00E-05 | 0.102608 | 0.004505 | 0.004777 | 0.026548 | 0.374094 | 0.152763 | 0.000322 | 0.001066 | 0.066391 | 0.081406 | 0.427564 | 0.006438 | 0.020416 |
| 0.000758 | 0        | 0.004666 | 0.000114 | 0        | 0.00141  | 0.009687 | 0.007444 | 8.27E-05 | 0        | 0.007463 | 0.003657 | 0.017229 | 0.000469 | 0.001281 |
| 0.000212 | 0.000926 | 0.002875 | 0.001735 | 0.000407 | 0.001311 | 0.002529 | 0.001891 | 0.001333 | 0        | 0.015671 | 0.001673 | 0.000185 | 0.000392 | 0.002856 |
| 0.000231 | 0.000123 | 0        | 0.000857 | 0.00083  | 0.000159 | 0.000378 | 0.000291 | 0.00034  | 0.001397 | 0.002252 | 0.000358 | 0.000273 | 0.000175 | 0        |
| 0.039656 | 0.002547 | 0.097572 | 0.03299  | 0.015141 | 0.033648 | 0.031739 | 0.031046 | 0.059673 | 0.033229 | 0.02388  | 0.036504 | 0.002622 | 0.016207 | 0.022947 |
| 0.001201 | 0.004334 | 0.003299 | 0.000221 | 0.003578 | 0.000607 | 0.000836 | 0.002983 | 0.000376 | 0.002682 | 0.006665 | 0.001889 | 0.001632 | 0.000325 | 0.004699 |
| 0.00111  | 0.000119 | 0.00307  | 0.000485 | 0.000183 | 0.000141 | 0.001756 | 0.002323 | 0.000201 | 0        | 0.008839 | 0.00151  | 0.000982 | 8.22E-05 | 0.002927 |
| 0.065809 | 0.025162 | 0.015118 | 0.009552 | 0.028537 | 0.009224 | 0.034869 | 0.043158 | 0.005584 | 0.018537 | 0.118874 | 0.026571 | 0.030869 | 0.007324 | 0.009579 |
| 0.011831 | 0.000572 | 0.006271 | 0.002813 | 0.004069 | 0.000974 | 0.009454 | 0.00577  | 0.000517 | 0.003667 | 0.064641 | 0.007292 | 0.001396 | 0.000587 | 0.005474 |
| 0.111479 | 0.000185 | 0.04711  | 0.03853  | 0.009202 | 0.005406 | 0.029477 | 0.019389 | 0.011963 | 0.039005 | 0.037918 | 0.046159 | 0.00463  | 0.017852 | 0.003488 |
| 0.016985 | 0.002113 | 0.024415 | 0.106996 | 0.011302 | 0.00844  | 0.007452 | 0.00261  | 0.002324 | 0.011478 | 0.183271 | 0.134827 | 0        | 0.00499  | 0.339126 |
| 0.003837 | 0.001528 | 0.010911 | 0.020283 | 0.029445 | 0.011353 | 0.016069 | 0.008189 | 0.016581 | 0.018553 | 0.024665 | 0.045812 | 0.000657 | 0.005216 | 0.03304  |
| 0.000846 | 0.00058  | 0.002911 | 0.009824 | 0.001077 | 0.000602 | 0.001173 | 0        | 0.000582 | 0.000977 | 0        | 0.004041 | 0        | 0.001844 | 0.000807 |
| 0.000171 | 0.000132 | 0.001023 | 0.001878 | 0        | 0.000615 | 0.000235 | 0.000984 | 0.000869 | 0.002932 | 0.014822 | 0.002846 | 0        | 0.001787 | 0.01934  |
| 0.001424 | 0.002204 | 0.002408 | 0.002642 | 0.001409 | 0.000756 | 0.000859 | 0.000476 | 0.000538 | 0        | 0.001377 | 0.000363 | 0.003574 | 0.000479 | 0.000562 |
| 0.001399 | 0.00026  | 0.00142  | 0.002177 | 0.00019  | 0.000182 | 0.000314 | 0.000279 | 0.000419 | 0        | 0.000759 | 0.000142 | 0.001137 | 0.000407 | 0.000838 |
| 0.001083 | 0.000965 | 0.001094 | 0.002185 | 8.81E-05 | 0.000415 | 0.000427 | 0.000297 | 0.000366 | 0        | 0.002393 | 0.001373 | 0.000953 | 0.000464 | 0.001811 |
| 0.000424 | 0.000142 | 0.004754 | 0.019926 | 0.002216 | 0.012481 | 0.001594 | 0.002349 | 0.011806 | 0.000347 | 0.003731 | 0.001678 | 0.000377 | 0.027485 | 0.009445 |
| 0.001198 | 2.89E-05 | 0.008759 | 0.047726 | 0.00018  | 0.005823 | 0.005558 | 0.005045 | 0.000229 | 0        | 0.009727 | 0.011396 | 0.00062  | 0.007441 | 0.032281 |
| 0.000879 | 0        | 0.01279  | 0.009017 | 0.000644 | 0.001628 | 0.001455 | 0.001307 | 0.000888 | 0.000372 | 0.007643 | 0.007014 | 0.000709 | 0.001529 | 0.003093 |
| 0.001077 | 0.054844 | 0.000688 | 0.007054 | 0.109606 | 0.057774 | 0.002715 | 0.014884 | 0.13883  | 0.008198 | 0.002651 | 0.005019 | 0.002437 | 0.061076 | 0.003006 |
| 0.000143 | 0.0099   | 0        | 0.000707 | 0.024102 | 0.010352 | 0.000289 | 0.002578 | 0.026768 | 0.000937 | 0        | 0.000284 | 0.000377 | 0.008562 | 0.000538 |
| 0.001639 | 0.019003 | 0.000503 | 0.001049 | 0.00909  | 0.011806 | 0.000711 | 0.002217 | 0.012839 | 0.006034 | 0        | 0.002047 | 0.002312 | 0.032913 | 0.001258 |
| 0.010498 | 0.239491 | 0.005151 | 0.037824 | 0.312971 | 0.509165 | 0.014494 | 0.055782 | 0.460407 | 0.23368  | 0.01333  | 0.014853 | 0.028499 | 0.427862 | 0.037114 |
| 0.000264 | 0.004351 | 0.000273 | 0.000942 | 0.01218  | 0.024779 | 0.000174 | 0.002055 | 0.011092 | 0.013279 | 0        | 0.00011  | 0.001115 | 0.005272 | 0.001258 |
| 0.028828 | 0.002515 | 0.01406  | 0.077368 | 0.004093 | 0.057935 | 0.055204 | 0.05656  | 0.000883 | 0.033884 | 0.021088 | 0.065127 | 0.023359 | 0.028836 | 0.071135 |
| 6.89E-05 | 0.000413 | 0.000238 | 0.000114 | 0.018421 | 0        | 0.00536  | 0.011261 | 0.002996 | 0.001074 | 0.049729 | 0.028823 | 0        | 0.005234 | 0.016872 |
| 0.414603 | 0.332796 | 0.107389 | 0.403681 | 0.062468 | 0.054619 | 0.054728 | 0.014558 | 0.019336 | 0.338578 | 0.103164 | 0.098075 | 0.046083 | 0.270506 | 0.178118 |
| 0.048347 | 0.004036 | 0.001993 | 0.006946 | 0.001223 | 0.000506 | 0.000665 | 0.000473 | 0.000327 | 0.002633 | 0.002458 | 0.007424 | 0.000207 | 0.003064 | 0.005347 |
| 0.00014  | 0.007461 | 0        | 0.064082 | 0.021402 | 0.002763 | 0.001835 | 0.000203 | 0.002702 | 0.031776 | 0        | 0.044234 | 0        | 0.001991 | 0.000396 |
| 0.000769 | 0.001541 | 0.000212 | 0        | 0.02891  | 0.000182 | 0.001187 | 0.00022  | 0.017877 | 0.004144 | 0        | 0.002063 | 0        | 0.004755 | 0        |
| 0.000427 | 0.001539 | 0.000838 | 0.000243 | 0.004096 | 0        | 0        | 0        | 0.000459 | 0.006567 | 0        | 0.003336 | 0        | 0.000515 | 0.000214 |
| 0.001804 | 0.001633 | 0.01174  | 0.003841 | 0.066812 | 0.002756 | 0.01746  | 0.015398 | 0.015696 | 0.03352  | 0.002303 | 0.003825 | 0.032029 | 0.00538  | 0.000625 |
| 0.001402 | 0.049689 | 0.010514 | 0.000935 | 0.030353 | 0.001283 | 0.006824 | 0.022786 | 0.012805 | 0.014507 | 0.001595 | 0.002441 | 0.012148 | 0.001862 | 0.001764 |
| 0.056765 | 0.222861 | 0.338687 | 0.046826 | 0.148317 | 0.109294 | 0.126121 | 0.123996 | 0.099074 | 0.075497 | 0.073018 | 0.130923 | 0.1392   | 0.035963 | 0.078183 |
| 0.001631 | 0.002341 | 0        | 0.000942 | 0.00826  | 0.000324 | 0.000449 | 0.00049  | 8.80E-05 | 0.003409 | 0        | 0.001521 | 0.002481 | 0.000536 | 0.000609 |

| HC146    | HC145    | HC144    | HC143    | HC142    | HC141    | HC139    | HC138    | HC137    | HC112    | HC136    | HC133    | HC131    | HC130    | HC126    |
|----------|----------|----------|----------|----------|----------|----------|----------|----------|----------|----------|----------|----------|----------|----------|
| 0.000441 | 0.000136 | 0.00071  | 0.000434 | 0.002994 | 0.000338 | 6.87E-05 | 0        | 0        | 0.001021 | 0        | 9.71E-05 | 0.000396 | 0.000534 | 0.000118 |
| 0        | 0        | 0        | 0        | 0        | 0.000543 | 0        | 0        | 0        | 0.008154 | 5.66E-05 | 0.003644 | 0        | 0        | 0        |
| 0        | 0        | 0        | 0        | 0        | 0        | 0        | 0        | 0        | 0.000346 | 0        | 0        | 0        | 0        | 0        |
| 0.001701 | 0.000588 | 0.04978  | 0.118237 | 0.0093   | 0.004504 | 6.09E-05 | 0.001578 | 0.002095 | 0.007777 | 0.000799 | 0.001723 | 0.012103 | 0.054607 | 0.00433  |
| 0.000272 | 3.52E-05 | 0.004142 | 0.005739 | 0.000186 | 0.000364 | 0        | 0        | 3.86E-05 | 0.000773 | 6.92E-05 | 0.000279 | 0.000237 | 0.001354 | 0.00012  |
| 0.006747 | 0.006622 | 0.129949 | 0.10179  | 0.01348  | 0.002489 | 0.000224 | 0.000139 | 0.001562 | 0.018902 | 0.000715 | 0.002212 | 0.00901  | 0.029722 | 0.001059 |
| 0.008478 | 0.002462 | 0.139903 | 0.117252 | 0.029964 | 0.004393 | 0.000652 | 0.001792 | 0.00168  | 0.008336 | 0.001506 | 0.003191 | 0.002516 | 0.039182 | 0.005805 |
| 0        | 5.86E-05 | 0.010816 | 0.005048 | 6.61E-05 | 0        | 0        | 0        | 7.34E-05 | 0        | 0        | 0        | 0        | 0.002495 | 0.000209 |
| 0.001885 | 0.001042 | 0.031479 | 0.153255 | 0.039661 | 0.001297 | 0.000913 | 0        | 0.000272 | 0.004748 | 8.18E-05 | 0.005843 | 0.000814 | 0.02694  | 0.010785 |
| 0        | 0        | 0.003177 | 0.005347 | 0.000643 | 0.000169 | 0.000141 | 0        | 6.43E-05 | 0.000155 | 7.97E-05 | 8.49E-05 | 0        | 0.001454 | 0.00104  |
| 0.000777 | 0.000396 | 0.001433 | 0.005954 | 0.000342 | 0.004599 | 0.00013  | 0.000572 | 0.00087  | 0.000933 | 0.000722 | 0.000501 | 0.002838 | 0.008626 | 0.002058 |
| 0.000123 | 0.000305 | 0.000724 | 0.001378 | 0.000907 | 0.001113 | 0.000165 | 4.45E-05 | 4.77E-05 | 0        | 0.000145 | 0        | 0.000696 | 0.001334 | 0.000631 |
| 0.146906 | 0.032446 | 0.031998 | 0.009283 | 0.027622 | 0.044517 | 0.001369 | 0.032253 | 0.028702 | 0.024364 | 0.021441 | 0.022868 | 0.055256 | 0.084169 | 0.004689 |
| 0.000452 | 0.000119 | 0.000737 | 0.000528 | 0.001541 | 0.002621 | 0.000281 | 0.001106 | 0.00101  | 0.000964 | 0.001525 | 0.001023 | 0.002967 | 0.021463 | 0.001485 |
| 0.000148 | 0        | 0.000946 | 0.001214 | 0.000237 | 0        | 0        | 0        | 0.000136 | 0.000151 | 8.60E-05 | 0.00019  | 0.000107 | 0.000587 | 0        |
| 0.017009 | 0.002242 | 0.009434 | 0.022629 | 0.019625 | 0.011481 | 0.00132  | 0.004141 | 0.004263 | 0.011174 | 0.019696 | 0.004909 | 0.027132 | 0.065175 | 0.02146  |
| 0.00264  | 0.000406 | 0.001248 | 0.00346  | 0.004712 | 0.00288  | 0.000244 | 0.00048  | 0.000665 | 0.002585 | 0.000806 | 0.001731 | 0.003818 | 0.008713 | 0.000968 |
| 0.058649 | 0.072244 | 0.038672 | 0.021149 | 0.013123 | 0.015822 | 0        | 0.002479 | 0.018027 | 0.07864  | 0.001817 | 0.019754 | 0.014449 | 0.057729 | 0.005743 |
| 0.010898 | 0.0003   | 0.005946 | 0.042807 | 0.02003  | 0.191597 | 0.000145 | 0.002987 | 0.021512 | 0.076087 | 0.001901 | 0.02582  | 0.002416 | 0.0096   | 0.002207 |
| 0.02338  | 0.001855 | 0.015    | 0.032963 | 0.017721 | 0.025842 | 0        | 0.006203 | 0.007716 | 0.025666 | 0.003808 | 0.013458 | 0.012998 | 0.062473 | 0.002701 |
| 0.001177 | 0.00089  | 0.00378  | 0.002176 | 0.002258 | 0.002605 | 0.000291 | 0.000954 | 0.002717 | 0.003078 | 8.60E-05 | 0.003724 | 0.000636 | 0.00403  | 0.003509 |
| 0.000422 | 0.000491 | 0.000965 | 0.000822 | 0.001114 | 0.00597  | 0        | 0.000102 | 0.000488 | 0.004939 | 0.001162 | 0.002859 | 0.001166 | 0.000627 | 0.000375 |
| 5.94E-05 | 0        | 0.001628 | 0.003096 | 0.000171 | 0.000601 | 0.000678 | 0.000182 | 0.000441 | 0.000484 | 0.00112  | 0.001282 | 0.000174 | 0.002662 | 0.00019  |
| 0.000336 | 0        | 0.000737 | 0.003418 | 6.31E-05 | 0.000991 | 0        | 4.60E-05 | 0.000569 | 0.001599 | 7.55E-05 | 0.000841 | 0.000825 | 0.002422 | 0.000368 |
| 0.000197 | 1.76E-05 | 0.001206 | 0.002778 | 0.000141 | 0.002273 | 6.48E-05 | 0.000171 | 0.000325 | 0.002141 | 0.000141 | 0.000712 | 0.000973 | 0.002068 | 0        |
| 0.018707 | 0.001625 | 0.014392 | 0.004997 | 0.000694 | 0.029181 | 0.002001 | 0.001955 | 0.023458 | 0.008039 | 0.000141 | 0.018877 | 0.00131  | 0.01343  | 0.000893 |
| 0.00528  | 0.003635 | 0.021368 | 0.007261 | 0.000658 | 0.011851 | 0.000788 | 0.000891 | 0.003984 | 0.003708 | 0.000176 | 0.012831 | 0.001939 | 0.009747 | 0.000489 |
| 0.001344 | 0.000122 | 0.007792 | 0.008732 | 0.000306 | 0.010585 | 5.30E-05 | 0.000149 | 0.002717 | 0.004015 | 0        | 0.001888 | 0.001665 | 0.005424 | 0.000168 |
| 0.049158 | 0.018659 | 0.034025 | 0.003119 | 0.014964 | 0.01107  | 0.106496 | 0.036886 | 0.03611  | 0.013031 | 0.083268 | 0.057965 | 0.00383  | 0.038715 | 0.085087 |
| 0.012098 | 0.002873 | 0.012198 | 0.00056  | 0.002514 | 0.002706 | 0.021129 | 0.003285 | 0.007066 | 0.002807 | 0.010393 | 0.009014 | 0.000474 | 0.005831 | 0.018148 |
| 0.014576 | 0.010283 | 0.001526 | 0.000504 | 0.004471 | 0.006076 | 0.014135 | 0.01775  | 0.004936 | 0.000111 | 0.028805 | 0.006248 | 0.002205 | 0.012196 | 0.001049 |
| 0.361462 | 0.41464  | 0.096212 | 0.018637 | 0.074652 | 0.158397 | 0.445451 | 0.311564 | 0.391754 | 0.052539 | 0.352661 | 0.111157 | 0.021967 | 0.133512 | 0.288127 |
| 0.007307 | 0.008005 | 0.003154 | 0.000434 | 0.002258 | 0.004857 | 0.021031 | 0.00928  | 0.012386 | 0.000515 | 0.01027  | 0.000675 | 0.001177 | 0.002095 | 0.001786 |
| 0.036374 | 0.271498 | 0.141192 | 0.019309 | 0.084312 | 0.015679 | 0.067065 | 0.039597 | 0.017976 | 0.01133  | 0.049762 | 0.056642 | 0.027062 | 0.061659 | 0.016304 |
| 0.003998 | 0.007878 | 0.007356 | 0.003605 | 0.01482  | 0.006244 | 0.000242 | 0.004931 | 0.002899 | 0.00016  | 0        | 0        | 0.000111 | 0.001481 | 0.000416 |
| 0.164888 | 0.133424 | 0.081315 | 0.194017 | 0.074375 | 0.286775 | 0.067862 | 0.303978 | 0.235849 | 0.570047 | 0.26686  | 0.474619 | 0.203726 | 0.155588 | 0.03509  |
| 0.001425 | 0.000783 | 0.013775 | 0.005604 | 0.011366 | 0.003924 | 0.001123 | 0.001415 | 0.002989 | 0.005525 | 0.002727 | 0.002155 | 0.004462 | 0.003863 | 0.000371 |
| 0.006099 | 2.78E-05 | 0.002004 | 0.001485 | 0.004736 | 0.008169 | 0.000279 | 0.002433 | 0.00711  | 0.005401 | 0.002834 | 0.003551 | 0.002438 | 0.000153 | 0.001184 |
| 0.016748 | 0.000591 | 0.003089 | 0.002307 | 0.00379  | 0.008871 | 8.25E-05 | 0.018234 | 0.020812 | 0.007968 | 0.002526 | 0.000239 | 0.00965  | 0        | 0.005748 |
| 7.29E-05 | 5.86E-05 | 0.015584 | 0.001901 | 0.003003 | 0.004588 | 0        | 0.00232  | 0.002179 | 0.001319 | 0.000583 | 0.00019  | 0.005058 | 0.006158 | 0.000219 |
| 0.001474 | 0.000214 | 0.019243 | 0.003096 | 0.009895 | 0.005269 | 0.004945 | 0.006919 | 0.009172 | 0.001008 | 0.006021 | 0.001055 | 0.003448 | 0.034886 | 0.004869 |
| 0.0008   | 8.94E-05 | 0.011233 | 0.007196 | 0.009583 | 0.001503 | 0.00183  | 0.013885 | 0.004178 | 0.000817 | 0.002429 | 0.00059  | 0.001277 | 0.014484 | 0.002681 |
| 0.015095 | 0.002267 | 0.029146 | 0.054029 | 0.474832 | 0.096703 | 0.238023 | 0.168429 | 0.120353 | 0.028064 | 0.121657 | 0.123439 | 0.555408 | 0.010881 | 0.46733  |
| 0.000397 | 0.000674 | 0.000988 | 0.002447 | 0.002871 | 0.000543 | 0.000719 | 0.00087  | 0.0008   | 0.000582 | 0.001047 | 0.002119 | 0.001269 | 0.001928 | 0.000188 |

| HC125    | HC123    | HC121    | HC119    | HC118    | HC116    | HC135    | HC075    | HC037    | HC071    | HC030    | HC029    | HC027    | HC025    | HC023    |
|----------|----------|----------|----------|----------|----------|----------|----------|----------|----------|----------|----------|----------|----------|----------|
| 8.41E-05 | 0        | 0.001303 | 0.000724 | 0.000395 | 0        | 0.000403 | 0.005786 | 0.005707 | 0.001521 | 0.000358 | 0        | 0.000519 | 0        | 0.001193 |
| 0        | 0.018828 | 0.001078 | 0.000299 | 0        | 0.001075 | 0.002269 | 0.000153 | 0.001704 | 0.000249 | 0        | 0        | 0.001343 | 0.000144 | 0        |
| 0        | 0        | 0        | 0        | 0        | 0        | 0        | 0        | 0        | 0        | 0        | 0        | 0        | 0        | 0        |
| 0.000651 | 0.002033 | 0.000423 | 0.014335 | 0.015171 | 0.010552 | 0.006988 | 0.010622 | 0.01707  | 0.028067 | 0.002242 | 0.013466 | 0.003966 | 0.003528 | 0.012076 |
| 0        | 0.001265 | 0.000593 | 0.00286  | 0.008692 | 0.000828 | 0.001138 | 7.97E-05 | 0.003972 | 0.000962 | 0.000237 | 0.001345 | 0.001052 | 0.000768 | 0.000987 |
| 0.001067 | 0.011769 | 0.004327 | 0.031656 | 0.16894  | 0.001486 | 0.009375 | 0.009726 | 0.061004 | 0.023229 | 0.002559 | 0.030471 | 0.016098 | 0.001743 | 0.013482 |
| 0.000613 | 0.007319 | 0.00176  | 0.048942 | 0.042069 | 0.006556 | 0.008522 | 0.027769 | 0.050179 | 0.038319 | 0.004564 | 0.032877 | 0.010241 | 0.009221 | 0.019648 |
| 0        | 0.000418 | 0.000106 | 0.000988 | 0        | 0        | 0.000348 | 0.000538 | 0.00018  | 0.001289 | 8.58E-05 | 0.000636 | 0.000172 | 0.000152 | 0.000241 |
| 9.85E-05 | 0.001977 | 0        | 0.344157 | 0.20396  | 0.036304 | 0.051785 | 0.089437 | 0.073511 | 0.183088 | 8.58E-05 | 0.061809 | 0.097892 | 0.367587 | 0        |
| 0        | 0.000949 | 6.97E-05 | 0.010142 | 0.005863 | 0.001751 | 0.003573 | 0.001222 | 0.001894 | 0.004718 | 0        | 0.001424 | 0.006296 | 0.015912 | 7.09E-05 |
| 0.00075  | 0.005489 | 0.000973 | 0.001057 | 0.002181 | 0.001056 | 0.000711 | 0.001787 | 0.000898 | 0.001048 | 0.000701 | 0.000285 | 0.00238  | 0.002124 | 0.003433 |
| 0.000327 | 0.001773 | 0.00024  | 0.000758 | 0        | 0        | 0        | 0.000266 | 0.00039  | 0.000318 | 0        | 0        | 0.000538 | 0.000169 | 0.000601 |
| 0.042029 | 0.018885 | 0.025636 | 0.004204 | 0.018948 | 0.036613 | 0.049841 | 0.021431 | 0.025298 | 0.008078 | 0.059315 | 0.080263 | 0.06284  | 0.010188 | 0.07853  |
| 0.001377 | 0.001163 | 0.000237 | 0.000356 | 0.002118 | 0.000695 | 0.008458 | 0.008616 | 0.003372 | 0.002844 | 0.001003 | 0.004551 | 0.00221  | 0.000315 | 0.004604 |
| 0.000476 | 0.000463 | 5.16E-05 | 0.000942 | 0.000806 | 0.002599 | 0.000379 | 0.001581 | 0.001961 | 0.001925 | 0        | 0.000576 | 0.001437 | 0.000779 | 0.000145 |
| 0.00952  | 0.011069 | 0.008664 | 0.015414 | 0.013923 | 0.012266 | 0.031225 | 0.087883 | 0.031923 | 0.045237 | 0.004404 | 0.015921 | 0.029348 | 0.016489 | 0.034633 |
| 0.001994 | 0.00471  | 0.001063 | 0.004652 | 0.00776  | 0.004514 | 0.0037   | 0.008138 | 0.010034 | 0.006729 | 0.001248 | 0.005097 | 0.006036 | 0.00332  | 0.004655 |
| 0.009412 | 0.036595 | 0.011035 | 0.097367 | 0.042432 | 0.02871  | 0.037043 | 0.013027 | 0.043174 | 0.013234 | 0.020475 | 0.05404  | 0.010732 | 0.012669 | 0.005718 |
| 0.000526 | 0.037567 | 8.00E-05 | 0.062427 | 0.102122 | 0.029728 | 0.012648 | 0.022035 | 0.11474  | 0.005474 | 0.009838 | 0.030235 | 0.009146 | 0        | 0.000187 |
| 0.00353  | 0.029751 | 0.028009 | 0.029565 | 0.098709 | 0.032586 | 0.023573 | 0.026247 | 0.039376 | 0.027474 | 0.025778 | 0.028023 | 0.011467 | 0.001771 | 0.010914 |
| 0        | 0.001129 | 0        | 0.002113 | 0.007696 | 0.001189 | 0.004024 | 0.009407 | 0.003038 | 0.000653 | 0.00252  | 0.002    | 0.001362 | 0        | 0        |
| 0        | 0.000858 | 0        | 0.003274 | 0.001248 | 0.000348 | 0.005786 | 0.002252 | 0.003777 | 0.000438 | 0.000692 | 0.000364 | 0.000179 | 0        | 0.000266 |
| 0.001668 | 0.003287 | 0.001189 | 0.001907 | 0.000948 | 0.001777 | 0.000704 | 0.000638 | 0.001571 | 0.000404 | 0.001171 | 0.000958 | 0.002262 | 0.001011 | 0.00159  |
| 0.000377 | 0.002959 | 8.77E-05 | 0.000884 | 0.000711 | 0.003964 | 0.001281 | 0.000791 | 0.000139 | 0        | 0.000104 | 0.00077  | 0.001674 | 0.000533 | 0.00059  |
| 0.000195 | 0.00227  | 4.90E-05 | 0.000701 | 0.000363 | 0.002548 | 0.000988 | 0.000299 | 0.001606 | 0.000387 | 0.000343 | 0.000721 | 0.002068 | 0        | 8.22E-05 |
| 0.002977 | 0.017496 | 0.010687 | 0.019021 | 0.009419 | 0.047463 | 0.02011  | 0.000691 | 0.006118 | 0.000284 | 0.005936 | 0.018199 | 0.007889 | 0.009622 | 0.0084   |
| 0.000202 | 0.011396 | 0.000599 | 0.008683 | 0.004504 | 0.051743 | 0.018474 | 0.00012  | 0.00231  | 0.001702 | 0.003641 | 0.029356 | 0.00504  | 0.002831 | 8.50E-05 |
| 0        | 0.015756 | 0.00081  | 0.016138 | 0.036269 | 0.011298 | 0.010261 | 0.000133 | 0.003829 | 0.004228 | 0.001059 | 0.002121 | 0.002348 | 0.001456 | 0.001417 |
| 0.082057 | 0.008155 | 0.002436 | 0.004962 | 0.002655 | 0.010653 | 0.016703 | 0.05003  | 0.03294  | 0.011558 | 0.116373 | 0.035635 | 0.026724 | 0.012111 | 0.181285 |
| 0.012348 | 0.001242 | 0        | 0.000873 | 0.001501 | 0.001543 | 0.000862 | 0.009181 | 0.005333 | 0.001538 | 0.025077 | 0.007309 | 0.003811 | 0.001039 | 0.044169 |
| 0.018129 | 0.001209 | 0.009345 | 0.001275 | 0.001833 | 0.002984 | 0.010379 | 0.004757 | 0.003721 | 0.00153  | 0.011196 | 0.001115 | 0.0057   | 0.004528 | 0.003155 |
| 0.678609 | 0.07031  | 0.672575 | 0.029956 | 0.017431 | 0.091562 | 0.152241 | 0.085332 | 0.070288 | 0.039342 | 0.376132 | 0.110104 | 0.076754 | 0.072346 | 0.382099 |
| 0.016183 | 0.000666 | 0.036433 | 0.001516 | 0.000553 | 0.002668 | 0.006664 | 0.000771 | 0.000878 | 0        | 0.013432 | 0.003576 | 0.001379 | 0.002318 | 0.007674 |
| 0.000401 | 0.015282 | 0.005315 | 0.014105 | 0.005752 | 0.059438 | 0.057216 | 0.014595 | 0.031492 | 0.078993 | 0.049015 | 0.132673 | 0.027755 | 0.004271 | 0.002421 |
| 8.41E-05 | 0.001886 | 0        | 0.036399 | 0.025159 | 0.011513 | 0.001423 | 0.010357 | 0.005492 | 0        | 0.000887 | 0.000503 | 0.002744 | 0.015785 | 0        |
| 0.072307 | 0.604545 | 0.103497 | 0.06902  | 0.065016 | 0.260802 | 0.261235 | 0.231615 | 0.231881 | 0.241585 | 0.143434 | 0.205416 | 0.450625 | 0.008765 | 0.049598 |
| 0.001545 | 0.021392 | 0.000116 | 0.000816 | 0.002371 | 0.002055 | 0.00317  | 0.03598  | 0.009608 | 0.003987 | 0.003499 | 0.002261 | 0.007783 | 0        | 0.000323 |
| 0.007694 | 0.001547 | 0        | 0        | 0.001312 | 0.004527 | 0.014047 | 0.000432 | 0.007273 | 0.000627 | 0.004821 | 0.001485 | 0.005593 | 0.000157 | 0        |
| 0.011677 | 0.005636 | 0        | 0.000161 | 0.001312 | 0.001005 | 0.008988 | 0.024055 | 0.001283 | 0.005294 | 0.025556 | 0.000473 | 0.00085  | 0.000287 | 0.029071 |
| 0.00421  | 0.004676 | 0        | 0.000299 | 0        | 0.000424 | 0.000443 | 0.017923 | 0.000175 | 0.001237 | 0.006067 | 0.000267 | 0.000148 | 0        | 0.004093 |
| 0.002002 | 0.001706 | 0.003109 | 0.002056 | 0.00727  | 0.011134 | 0.010197 | 0.034697 | 0.011722 | 0.023289 | 0.014269 | 0.005351 | 0.008556 | 0.020768 | 0.02551  |
| 0.000442 | 0        | 0.001917 | 0.00085  | 0.010699 | 0.003933 | 0.007684 | 0.0283   | 0.008992 | 0.026743 | 0.009734 | 0.003157 | 0.009352 | 0.00855  | 0.007404 |
| 0.014313 | 0.01457  | 0.065996 | 0.113804 | 0.061507 | 0.207693 | 0.134574 | 0.083027 | 0.068528 | 0.160229 | 0.05108  | 0.074367 | 0.075157 | 0.386747 | 0.058887 |
| 0.000127 | 0        | 0.000191 | 0.000345 | 0.000379 | 0.000417 | 0.000569 | 0.018275 | 0.001622 | 0.002148 | 0.001068 | 0.0008   | 0.000534 | 0        | 0.000763 |

| HC022    | HC020    | HC019    | HC018    | HC016    | HC014    | HC012    | HC011    | HC010    | HC009    | HC008    | HC006    | HC005    | HC004    | HC002    |
|----------|----------|----------|----------|----------|----------|----------|----------|----------|----------|----------|----------|----------|----------|----------|
| 0        | 0        | 0.000306 | 0.002587 | 0.000894 | 0.000117 | 0.007192 | 0.000236 | 0.000862 | 0.000624 | 0.000703 | 0.000928 | 0.000223 | 0.000153 | 0.000153 |
| 0.002047 | 0        | 0        | 0        | 0.000209 | 0.000117 | 0.007591 | 0        | 0        | 8.53E-05 | 0        | 0.002364 | 0        | 0.000174 | 0        |
| 0        | 0        | 0        | 0        | 0        | 0        | 0        | 0        | 0        | 0        | 0        | 0.000135 | 0        | 0        | 0        |
| 0.002686 | 0.011169 | 0.002484 | 0.01467  | 0.007463 | 0.002289 | 0.014482 | 0.004224 | 0.007324 | 0.004854 | 0.005178 | 0.017668 | 0.005183 | 0.010715 | 0.01854  |
| 0.001107 | 0.006179 | 0.000176 | 0.000395 | 0.000439 | 0        | 0.001391 | 0.000835 | 0.000253 | 0.000322 | 5.21E-05 | 0        | 0.003928 | 0.002887 | 0.000562 |
| 0.006665 | 0.096666 | 0.00858  | 0.096966 | 0.010304 | 0.001276 | 0.062912 | 0.007986 | 0.011377 | 0.031894 | 0.017258 | 0.014726 | 0.032847 | 0.080807 | 0.002838 |
| 0.005237 | 0.047    | 0.005898 | 0.093318 | 0.011925 | 0.005894 | 0.063971 | 0.01225  | 0.003942 | 0.015537 | 0.010222 | 0.014891 | 0.112908 | 0.048228 | 0.023897 |
| 0        | 0.001866 | 0.000578 | 0.001584 | 0.000113 | 0.00015  | 0.00114  | 0.000548 | 0        | 0.000505 | 0        | 0.000216 | 0.003069 | 0.001835 | 0.000371 |
| 0.004254 | 0.145855 | 0.128571 | 0.0346   | 0.007969 | 0.061559 | 0.520702 | 0.006307 | 0.025895 | 0.020811 | 0.003841 | 0.311594 | 0.175412 | 0.055616 | 0.085184 |
| 0.000567 | 0.006415 | 0.006692 | 0.000684 | 0.000198 | 0.003069 | 0.007667 | 0.000416 | 0.000418 | 0.0002   | 0        | 0.004604 | 0.012691 | 0.002738 | 0.005695 |
| 0.003573 | 0.001011 | 0.001208 | 0.000405 | 0.000446 | 0.001303 | 0.000193 | 0.000718 | 0.001018 | 0.001808 | 0.00023  | 0.000128 | 0.001319 | 0.00142  | 0.002078 |
| 0.000514 | 0.000559 | 0.000896 | 0.00024  | 0.000708 | 0.000257 | 0        | 0        | 0.000145 | 0.000272 | 0.000846 | 0.000552 | 0.000289 | 0.00081  | 0.000784 |
| 0.022902 | 0.014514 | 0.176746 | 0.063047 | 0.018873 | 0.013754 | 0.005132 | 0.014715 | 0.054981 | 0.044979 | 0.090099 | 0.01975  | 0.034544 | 0.054874 | 0.019062 |
| 0.001356 | 0.000194 | 0.000108 | 0.000828 | 0.002014 | 0.00024  | 0.00782  | 0.002548 | 0.009133 | 0.00425  | 0.002834 | 0.004725 | 0.000908 | 0.000644 | 0.000468 |
| 0.000639 | 0        | 0.000505 | 0.000917 | 5.29E-05 | 0        | 0.002131 | 0.000129 | 0.000176 | 0.000985 | 0.000195 | 0.000639 | 0.001098 | 0.001157 | 7.79E-05 |
| 0.047973 | 0.022161 | 0.017948 | 0.053073 | 0.013635 | 0.003712 | 0.037533 | 0.014092 | 0.031214 | 0.052452 | 0.064078 | 0.014624 | 0.010994 | 0.02497  | 0.004404 |
| 0.007156 | 0.001054 | 0.001815 | 0.007469 | 0.002303 | 0.000386 | 0.00812  | 0.00173  | 0.006178 | 0.007306 | 0.011637 | 0.00296  | 0.002512 | 0.00426  | 0.00039  |
| 0.019699 | 0.017418 | 0.265881 | 0.169437 | 0.023123 | 0.005498 | 0.024527 | 0.019954 | 0.027502 | 0.031773 | 0.087833 | 0.030512 | 0.010412 | 0.039051 | 0.014861 |
| 0.001045 | 0.0015   | 0.023296 | 0.04749  | 0.009399 | 0.005154 | 0.060826 | 0.013968 | 0.027491 | 0.025356 | 0.018026 | 0.002744 | 0.011126 | 0.075517 | 0.004182 |
| 0.034031 | 0.045467 | 0.016361 | 0.023987 | 0.02735  | 0.00848  | 0.046676 | 0.01005  | 0.018764 | 0.038586 | 0.027987 | 0.030336 | 0.007417 | 0.073266 | 0.006472 |
| 0.00132  | 0.000747 | 0.01272  | 0.01401  | 0.001508 | 0.001569 | 0.004585 | 0.001073 | 0.000924 | 0.00385  | 0.002435 | 0.002854 | 0.001998 | 0.002297 | 0.000359 |
| 0.000937 | 0.000946 | 0.00275  | 0.00358  | 0.000667 | 0.000287 | 0.000879 | 0.000791 | 0.001115 | 0.003554 | 0.001111 | 0.001195 | 0.000299 | 0.001187 | 0.000243 |
| 0.001507 | 0.001436 | 0.000981 | 0.00044  | 0.000414 | 0.002562 | 0.000157 | 0.001577 | 0.000384 | 0.001126 | 0.000117 | 0.000362 | 0.000592 | 0.001352 | 0.00216  |
| 0.000721 | 0.000941 | 0        | 0.000302 | 0.000499 | 0.000117 | 0.000341 | 0.000387 | 0.000151 | 0.000423 | 0.000113 | 0.000534 | 0.000392 | 0.000157 | 0.000855 |
| 0.001002 | 0.001839 | 0.000414 | 0.000206 | 0.000117 | 0        | 0        | 0.000888 | 0.00074  | 0.000414 | 0.000213 | 0.000391 | 0.000788 | 0.000827 | 0.000578 |
| 0.027062 | 0.013718 | 0.014614 | 0        | 0.001407 | 0.020094 | 0.000184 | 0.00614  | 0.017211 | 0.007847 | 0.000503 | 0.000322 | 0.001899 | 0.032892 | 0.006231 |
| 0.008492 | 0.015869 | 0.025582 | 9.96E-05 | 0.00069  | 0.007623 | 0.000184 | 0.004273 | 0.003134 | 0.010515 | 0.001662 | 0.008087 | 0.000564 | 0.018532 | 0.004444 |
| 0.003101 | 0.003958 | 0.002921 | 0.001371 | 0.000627 | 0.002529 | 0.002243 | 0.000543 | 0.00229  | 0.001204 | 0.001784 | 0.000471 | 0.00031  | 0.006307 | 0.000635 |
| 0.081369 | 0.024172 | 0.004871 | 0.000921 | 0.050402 | 0.042444 | 0.001144 | 0.016832 | 0.132507 | 0.02003  | 0.011411 | 0.001235 | 0.021579 | 0.024729 | 0.082792 |
| 0.014829 | 0.004431 | 0.000794 | 0.000546 | 0.013295 | 0.008929 | 0.000547 | 0.003176 | 0.026856 | 0.003627 | 0.001801 | 0.00038  | 0.002805 | 0.004408 | 0.019022 |
| 0.014626 | 0.006996 | 0.00262  | 0.000216 | 0.002926 | 0.00726  | 0.000888 | 0.011264 | 0.001166 | 0.005212 | 0.002083 | 0.000358 | 0.008234 | 0.003828 | 0.008939 |
| 0.365161 | 0.140359 | 0.114275 | 0.007957 | 0.197827 | 0.348103 | 0.004365 | 0.379116 | 0.176009 | 0.175995 | 0.053574 | 0.013126 | 0.125761 | 0.192658 | 0.355093 |
| 0.015648 | 0.007969 | 0.005161 | 0        | 0.007581 | 0.021217 | 0.000206 | 0.025982 | 0.000631 | 0.005435 | 0.002648 | 0.000201 | 0.004341 | 0.004463 | 0.013881 |
| 0.035364 | 0.079991 | 0.111808 | 0.020967 | 0.036887 | 0.039079 | 0.000731 | 0.095735 | 0.025471 | 0.122827 | 0.079283 | 0.15204  | 0.010893 | 0.065297 | 0.124839 |
| 0.001117 | 0        | 0.00144  | 0        | 0.000182 | 0.000253 | 0.000763 | 0.001879 | 0.005177 | 0.002084 | 0.000916 | 0.000354 | 0        | 0.005023 | 0.000453 |
| 0.117853 | 0.139488 | 0.029466 | 0.219346 | 0.258664 | 0.092055 | 0.076743 | 0.213243 | 0.156878 | 0.228687 | 0.380058 | 0.090739 | 0.028112 | 0.042069 | 0.101214 |
| 0.000406 | 0.000575 | 0.00127  | 0.019033 | 0.004084 | 0.014234 | 0.009848 | 0.002905 | 0.004474 | 0.003853 | 0.009623 | 0.017748 | 0.000627 | 0.00053  | 0.001211 |
| 0.002273 | 0        | 0        | 0.049864 | 0.000814 | 0.000563 | 0.000637 | 0.016827 | 0.021222 | 0.014628 | 0.002066 | 0.000351 | 0        | 0.000165 | 0.006042 |
| 0.012593 | 0.001559 | 0.000777 | 0.000103 | 0.001041 | 0.003792 | 0.000938 | 0.002098 | 0.00539  | 0.001582 | 0.006038 | 0.002821 | 7.76E-05 | 0.000865 | 0.004134 |
| 0.001821 | 0        | 0.000442 | 0.013657 | 0.001315 | 0.000743 | 0.001575 | 0        | 0.005145 | 0.000469 | 0.007596 | 0.00205  | 0        | 0        | 0.000333 |
| 0.019873 | 0.008631 | 0.003658 | 0.011104 | 0.029492 | 0.003382 | 0.0062   | 0.009408 | 0.011778 | 0.002114 | 0.016594 | 0.014138 | 0.017114 | 0.008265 | 0.01378  |
| 0.003013 | 0.004426 | 0.002212 | 0.012695 | 0.009532 | 0.001589 | 0.002566 | 0.013688 | 0.006295 | 0.001523 | 0.008833 | 0.008485 | 0.005132 | 0.004629 | 0.006503 |
| 0.108096 | 0.121086 | 0.003176 | 0.006322 | 0.233521 | 0.266697 | 0.004087 | 0.080665 | 0.167277 | 0.09883  | 0.067615 | 0.206319 | 0.340651 | 0.100233 | 0.055957 |
| 0.000367 | 0.001834 | 0        | 0.005562 | 0.009093 | 0.001626 | 0.000184 | 0.000805 | 0.001098 | 0.001572 | 0.000903 | 0.001345 | 0.00095  | 0.000165 | 0.000283 |

|          |          |          |          |          |          |          |          |          |          |          |          |          |          |          |
|----------|----------|----------|----------|----------|----------|----------|----------|----------|----------|----------|----------|----------|----------|----------|
| HC001    | HC031    | HC033    | HC034    | HC035    | HC069    | HC067    | HC066    | HC063    | HC060    | HC059    | HC058    | HC055    | HC053    | HC052    |
| 0.000276 | 0        | 0.000198 | 0.000562 | 0.000745 | 0.000628 | 0.001062 | 0.001387 | 9.49E-05 | 0.000211 | 0        | 0.002631 | 0.001394 | 0.00018  | 0.006551 |
| 0.00489  | 0        | 0.000437 | 0.000251 | 0.000635 | 0.000231 | 0.003424 | 0.044518 | 7.65E-05 | 0.000206 | 0.000378 | 0        | 0        | 0.008558 | 0.000647 |
| 0.000829 | 0        | 0        | 0        | 0.00011  | 0        | 0        | 0.000487 | 0        | 0        | 0        | 0        | 0        | 0        | 0        |
| 0.075946 | 0.003421 | 0.007474 | 0.002776 | 0.078335 | 0.01169  | 0.035688 | 0.028708 | 0.010775 | 0.039656 | 0.006013 | 0.01329  | 0.120272 | 0.004002 | 0.028816 |
| 0.004443 | 0        | 0.000365 | 0.001592 | 0.002827 | 0.001463 | 0.000983 | 0.002902 | 0.001543 | 0.004797 | 0.000858 | 0.000822 | 0.000459 | 0.000544 | 0.001447 |
| 0.048581 | 0.005501 | 0.002759 | 0.010342 | 0.092843 | 0.044736 | 0.010311 | 0.002981 | 0.025568 | 0.118551 | 0.007125 | 0.051974 | 0.093509 | 0.005835 | 0.069473 |
| 0.052724 | 0.007139 | 0.009854 | 0.014731 | 0.056269 | 0.036783 | 0.026922 | 0.175542 | 0.010931 | 0.095582 | 0.00781  | 0.050527 | 0.060489 | 0.004517 | 0.033697 |
| 0.00091  | 0        | 0.000131 | 0.000166 | 0.00108  | 0.002207 | 0.000166 | 0.000164 | 0.000545 | 0.003883 | 0        | 9.81E-05 | 0.00084  | 0.000176 | 0.001205 |
| 0.415123 | 0.028376 | 0.009723 | 0.000714 | 0.031409 | 0.058131 | 0.623143 | 0.058717 | 0.024861 | 0.078043 | 0.02756  | 0.096602 | 0.053337 | 0.09997  | 0.361382 |
| 0.023361 | 0.001446 | 0.000613 | 0        | 0.000536 | 0.002434 | 0.018339 | 0.002202 | 0.001381 | 0.00451  | 0.003078 | 0.002576 | 0.001497 | 0.005774 | 0.011832 |
| 0.002039 | 0.001284 | 0.000388 | 0.001061 | 0.000103 | 0.003872 | 0.000975 | 0.002026 | 0.00183  | 0.002968 | 0.005359 | 0.000399 | 0.001259 | 0.001059 | 0.001102 |
| 0.000609 | 0.000467 | 0        | 0        | 0.000162 | 0.000307 | 0        | 0        | 0.000113 | 0.000991 | 0.001828 | 0.001177 | 0.001196 | 0.000371 | 0        |
| 0.034911 | 0.034052 | 0.064692 | 0.005953 | 0.03815  | 0.037318 | 0.005833 | 0.015093 | 0.062606 | 0.051376 | 0.045594 | 0.03476  | 0.043412 | 0.050252 | 0.014583 |
| 0.00082  | 0.001375 | 0.001303 | 0.001715 | 0.002405 | 0.005273 | 0.002496 | 0.003017 | 0.009204 | 0.001596 | 0.0041   | 0.00314  | 0.001917 | 0.003047 | 0.004229 |
| 0.001015 | 0.000442 | 0.000131 | 0.000654 | 0.000698 | 0.001578 | 0.003059 | 0.001326 | 0.000591 | 0.00017  | 0.000285 | 0.000245 | 0.000349 | 0.000677 | 0.003616 |
| 0.014832 | 0.011352 | 0.005085 | 0.008085 | 0.036743 | 0.037491 | 0.022777 | 0.018974 | 0.04837  | 0.01671  | 0.021161 | 0.034551 | 0.033789 | 0.025742 | 0.027087 |
| 0.003347 | 0.002596 | 0.000811 | 0.001853 | 0.005598 | 0.005829 | 0.007577 | 0.005505 | 0.006275 | 0.001829 | 0.002757 | 0.006445 | 0.003018 | 0.009491 | 0.008492 |
| 0.029907 | 0.012836 | 0.072441 | 0.035973 | 0.02432  | 0.047856 | 0.061865 | 0.044999 | 0.053702 | 0.0565   | 0.04627  | 0.029167 | 0.006416 | 0.049816 | 0.019015 |
| 0.060514 | 0.041403 | 0.064408 | 0.000888 | 0.008827 | 0.080959 | 0.068023 | 0.134534 | 0.014886 | 0.026627 | 0.128071 | 0.016356 | 0.013742 | 0.014756 | 0.099174 |
| 0.028689 | 0.030314 | 0.024031 | 0.017324 | 0.018316 | 0.028722 | 0.008187 | 0.023731 | 0.038578 | 0.065045 | 0.016148 | 0.034055 | 0.048758 | 0.021207 | 0.07266  |
| 0.002299 | 0.001925 | 0.000563 | 0.001309 | 0.000997 | 0.001694 | 0.001965 | 0.003066 | 0.003024 | 0.002174 | 0.014627 | 0.000656 | 0.001022 | 0.001419 | 0.00455  |
| 0.000495 | 0.001263 | 0.005432 | 0.000637 | 0        | 0.001997 | 0.003194 | 0.001071 | 0.004099 | 0.000215 | 0.002295 | 0.001521 | 0.000642 | 0.000717 | 0.002317 |
| 0.001308 | 0.001225 | 0.001199 | 0.000124 | 0.000256 | 0.001347 | 0.000396 | 0.000687 | 0.000432 | 0.002596 | 0.001477 | 0.000147 | 0.000515 | 0.002132 | 0.000207 |
| 0        | 0        | 0.00128  | 0.000131 | 0.000256 | 0.002214 | 0.000246 | 0.001697 | 0.001231 | 0.002825 | 0.001423 | 0        | 0.000412 | 0.000692 | 0.000741 |
| 0.000593 | 0.000267 | 0.000938 | 0.000248 | 0.000339 | 0.001795 | 0.000523 | 0.002458 | 0.003333 | 0.00304  | 0.002068 | 0.000129 | 0.000404 | 0.000954 | 0.000509 |
| 0.005304 | 0.029743 | 0.013294 | 0.031132 | 0.000599 | 0.010199 | 0.000468 | 0.004934 | 0.009553 | 0.009653 | 0.014801 | 0        | 0.000166 | 0.010553 | 0.001783 |
| 0.02029  | 0.015432 | 0.016215 | 0.006444 | 0.001222 | 0.003478 | 0.002512 | 0.000353 | 0.006967 | 0.003192 | 0.016286 | 0.001196 | 0.000222 | 0.005424 | 0.019158 |
| 0.015157 | 0.005968 | 0.00321  | 0.002639 | 0.001924 | 0.003507 | 0.001434 | 0.004167 | 0.002865 | 0.003797 | 0.006489 | 0.000405 | 0.000222 | 0.003191 | 0.003685 |
| 0.001949 | 0.048921 | 0.007785 | 0.010964 | 0.00257  | 0.017111 | 0.000396 | 0.00806  | 0.024531 | 0.021624 | 0.02426  | 0.004857 | 0.05199  | 0.025735 | 0.003295 |
| 0.000967 | 0.007393 | 0.001005 | 0.003703 | 0.000422 | 0.003026 | 0        | 0.000785 | 0.003698 | 0.001435 | 0.005012 | 0.000662 | 0.012245 | 0.005021 | 0.000232 |
| 0.00121  | 0.014048 | 0.00275  | 0.012715 | 0.000237 | 0.001755 | 0.000262 | 0.002415 | 0.001968 | 0.006111 | 0.005052 | 0.003741 | 0.002344 | 0.000522 | 0.000578 |
| 0.013012 | 0.228053 | 0.141231 | 0.487872 | 0.009623 | 0.081046 | 0.001514 | 0.047755 | 0.097055 | 0.121456 | 0.139047 | 0.026837 | 0.134292 | 0.074502 | 0.015848 |
| 0.000528 | 0.010285 | 0.00609  | 0.023747 | 0.000343 | 0.002239 | 0        | 0.002549 | 0.000912 | 0.003026 | 0.002241 | 0.000693 | 0.002883 | 0.003681 | 0.000884 |
| 0.05724  | 0.054468 | 0.066906 | 0.027846 | 0.022653 | 0.008451 | 0.009138 | 0.00129  | 0.045468 | 0.01328  | 0.054111 | 0.158137 | 0.032276 | 0.025133 | 0.076365 |
| 0.008415 | 0.000425 | 0.000609 | 0.000149 | 0.00041  | 0        | 0.003115 | 0.001795 | 0.002893 | 0.007976 | 0.128289 | 0.000374 | 0.007501 | 0.000933 | 0.000598 |
| 0.009926 | 0.144438 | 0.312723 | 0.066511 | 0.103455 | 0.273367 | 0.029252 | 0.282099 | 0.383468 | 0.12702  | 0.159487 | 0.240781 | 0.106792 | 0.314052 | 0.036463 |
| 0.002063 | 0.003326 | 0.00518  | 0.00209  | 0.001884 | 0.003951 | 0.000555 | 0.008511 | 0.00671  | 0.001672 | 0.001872 | 0.004262 | 0.008126 | 0.010161 | 0.004021 |
| 0.000536 | 0.066241 | 0.009521 | 0.202472 | 0.001336 | 0.012388 | 0        | 0.00017  | 0.000383 | 0.002829 | 0.000543 | 0.000104 | 0.005917 | 0.001606 | 0.00121  |
| 0.001625 | 0.003438 | 0.031893 | 6.01E-05 | 0.003931 | 0        | 0        | 0.005937 | 0.002489 | 0.001883 | 0.001672 | 0.000251 | 0.015556 | 0.007322 | 0.00038  |
| 0        | 0.000446 | 0.00087  | 0.000205 | 0.000284 | 0.0013   | 0.000206 | 0.000554 | 0.000649 | 0.000664 | 0.003384 | 0        | 0.007944 | 0.000169 | 0.000267 |
| 0.021086 | 0.004751 | 0.004968 | 0.002288 | 0.006036 | 0.020365 | 0.001014 | 0.005877 | 0.003367 | 0.033155 | 0.00241  | 0.012639 | 0.050168 | 0.006217 | 0.002055 |
| 0.009122 | 0.001992 | 0.002281 | 0.001135 | 0.008334 | 0.007718 | 0.000753 | 0.003985 | 0.003939 | 0.015853 | 0.001219 | 0.008555 | 0.039254 | 0.007319 | 0.00327  |
| 0.022865 | 0.173377 | 0.098253 | 0.009472 | 0.431977 | 0.131799 | 0.041426 | 0.041507 | 0.078805 | 0.043978 | 0.087373 | 0.151416 | 0.031365 | 0.184309 | 0.055824 |
| 0.000244 | 0.000571 | 0.00096  | 0.001468 | 0.0008   | 0.001744 | 0.0008   | 0.001466 | 0.000233 | 0.001296 | 0.000165 | 0.003821 | 0.002091 | 0.002262 | 0.000751 |

| HC074    | HC049    | HC047    | HC045    | HC044    | HC043    | HC042    | HC041    | HC040    | HC039    | HC038    | HC148    | HC048    | HC150    |          |
|----------|----------|----------|----------|----------|----------|----------|----------|----------|----------|----------|----------|----------|----------|----------|
| 0.000991 | 7.92E-05 | 0        | 0.000314 | 0.000222 | 0.001521 | 0.000276 | 0.039341 | 0.000227 | 0.000178 | 0.001185 | 0.000465 | 9.97E-05 | 0.000164 | 0        |
| 0        | 0        | 0        | 0        | 0        | 0        | 0.011377 | 0.000182 | 0        | 0        | 0.02162  | 0        | 0        | 0.000381 | 0        |
| 0        | 0        | 0        | 0        | 0        | 0        | 0.000324 | 0        | 0        | 0        | 0.000274 | 0        | 0        | 0        | 0        |
| 0.031657 | 0.001886 | 0.004222 | 0.005397 | 0.002513 | 0.027047 | 0.026966 | 0.08347  | 0.001457 | 0.000478 | 0.033955 | 0.028693 | 0.000997 | 0.017556 | 0.000871 |
| 0.006967 | 0.002855 | 0.000487 | 0.000789 | 0.000536 | 0.000984 | 0.005422 | 0.007865 | 0.000413 | 2.69E-05 | 0.00344  | 0.001066 | 0.000103 | 0.001645 | 0        |
| 0.152651 | 0.012604 | 0.002016 | 0.001602 | 0.009986 | 0.083111 | 0.04529  | 0.282359 | 0.004057 | 0.00019  | 0.001344 | 0.004895 | 0.000801 | 0.016228 | 0.000638 |
| 0.072781 | 0.006074 | 0.007107 | 0.019777 | 0.004731 | 0.034565 | 0.066606 | 0.205844 | 0.004535 | 0.0003   | 0.037386 | 0.009302 | 0.003877 | 0.02877  | 0.00065  |
| 0.001032 | 0.000603 | 0.000311 | 0.000281 | 7.60E-05 | 0.000792 | 0.002306 | 0.009585 | 0.000407 | 2.02E-05 | 0        | 2.04E-05 | 0        | 0.000126 | 0.000128 |
| 0.046207 | 0.035062 | 0.00639  | 0.000619 | 0.002028 | 0.02335  | 0.106331 | 0.087184 | 0.031466 | 0.000423 | 0.044778 | 0.015784 | 0        | 0.839858 | 0.000312 |
| 0.002146 | 0.001614 | 0.000471 | 0        | 7.79E-05 | 0.000504 | 0.004984 | 0.003523 | 0.001997 | 0        | 0.003157 | 0.000677 | 0        | 0.020433 | 0        |
| 0.000995 | 0.000946 | 0.001968 | 0.000877 | 0.00118  | 0.000596 | 0.002315 | 0.002558 | 0.001007 | 0.000653 | 0.003086 | 0.004077 | 0.001292 | 0.000474 | 0.002206 |
| 0.000208 | 7.22E-05 | 0.000563 | 0        | 0.0011   | 0.000613 | 0.001286 | 0.000801 | 0.000361 | 0.000329 | 0        | 0.000281 | 0.00031  | 6.57E-05 | 0.000501 |
| 0.023014 | 0.009812 | 0.060928 | 0.019962 | 0.028384 | 0.025917 | 0.012121 | 0.003768 | 0.028439 | 0.018799 | 0.082138 | 0.033877 | 0.025494 | 0.00319  | 0.012057 |
| 0.001603 | 0.00055  | 0.00108  | 0.001604 | 0.000553 | 0.003772 | 0        | 0.000182 | 0.000171 | 0.000298 | 0.011142 | 0.002137 | 0.000132 | 8.49E-05 | 0.000725 |
| 0.000934 | 0.000384 | 0.000644 | 0.000356 | 3.99E-05 | 0.000838 | 0.000581 | 0.007155 | 0.000188 | 2.42E-05 | 0.002945 | 0.000874 | 0        | 0.000498 | 0        |
| 0.02657  | 0.011067 | 0.005026 | 0.019636 | 0.010552 | 0.053939 | 0.008166 | 0.027335 | 0.009026 | 0.003555 | 0.060898 | 0.020222 | 0.014413 | 0.002453 | 0.004542 |
| 0.003328 | 0.000862 | 0.000755 | 0.00131  | 0.001536 | 0.009581 | 0.006089 | 0.014664 | 0.000718 | 0.00012  | 0.020488 | 0.003034 | 0.000847 | 0.000559 | 0.000171 |
| 0.032632 | 0.008501 | 0.012152 | 0.012573 | 0.048369 | 0.048809 | 0.05176  | 0.000683 | 0.003252 | 0.024287 | 0.071792 | 0.040569 | 0.023809 | 0.001604 | 0.012853 |
| 0.012469 | 0.002515 | 0.010877 | 0.008849 | 0.006726 | 0.027776 | 0.2507   | 0.012889 | 0.000933 | 0.006657 | 0.171173 | 0.00297  | 0.021107 | 0.042293 | 0.002985 |
| 0.045958 | 0.009104 | 0.00944  | 0.013165 | 0.010009 | 0.026734 | 0.041926 | 0.004242 | 0.004882 | 0.004293 | 0.017703 | 0.004729 | 0.002083 | 0.001216 | 0.004425 |
| 0.001008 | 0.001491 | 0.001139 | 0.001405 | 0.003127 | 0.017457 | 0.001334 | 0.000155 | 6.79E-05 | 0.00251  | 0.034716 | 0.000302 | 0.000798 | 0.000164 | 0.000409 |
| 0.000216 | 0.000445 | 0        | 7.86E-05 | 0.000994 | 0.003959 | 0.013293 | 0.00041  | 0.000318 | 0.000426 | 0.022451 | 5.88E-05 | 0        | 0.001615 | 0.000706 |
| 0.00133  | 0.000179 | 0.004763 | 0.001363 | 0.000479 | 0.003221 | 0.000953 | 0.0003   | 0.000522 | 0.000914 | 0.001724 | 0.005463 | 0.000755 | 0.000164 | 0.002326 |
| 0.001591 | 0        | 0.001169 | 0.000773 | 2.09E-05 | 0.001429 | 0.000858 | 0.001739 | 0.000177 | 7.00E-05 | 0.002149 | 0.004366 | 0.000545 | 7.39E-05 | 0.000308 |
| 0.001248 | 9.32E-05 | 0.001296 | 0.000711 | 5.51E-05 | 0.00135  | 0.000334 | 0.001611 | 0.000208 | 7.94E-05 | 0.002219 | 0.005028 | 0.000687 | 8.76E-05 | 0.000458 |
| 0.011548 | 0.026145 | 0.022512 | 0.005449 | 0.001718 | 0.000367 | 0.000267 | 0.000628 | 0.028649 | 0.005273 | 0.001026 | 0.007809 | 0.004283 | 0.000969 | 0.002615 |
| 0.005625 | 0.023054 | 0.003286 | 0.000402 | 0.00019  | 0.002046 | 0.019944 | 0.018014 | 0.008415 | 0.004611 | 0.002511 | 0.008372 | 0.004743 | 0.0004   | 0.000366 |
| 0.007375 | 0.002015 | 0.001924 | 0.000345 | 0.000352 | 0.001404 | 0.010301 | 0.01116  | 0.001537 | 0.00031  | 0.001866 | 0.003507 | 0.00042  | 0.002853 | 0.000255 |
| 0.018343 | 0.051661 | 0.040218 | 0.078555 | 0.084314 | 0.000229 | 0.000343 | 0.000537 | 0.148447 | 0.042526 | 0.002051 | 0.006033 | 0.031016 | 0.000359 | 0.076003 |
| 0.003846 | 0.009654 | 0.008065 | 0.017073 | 0.026366 | 0.000117 | 0.000324 | 0        | 0.050933 | 0.010865 | 0        | 0.001608 | 0.006719 | 9.86E-05 | 0.015658 |
| 0.003386 | 0.012374 | 0.009814 | 0.009819 | 0.009575 | 0.000358 | 0        | 0.001129 | 0.002866 | 0.009504 | 0.001512 | 0.000734 | 0.0141   | 5.20E-05 | 0.01358  |
| 0.071125 | 0.382477 | 0.340426 | 0.533443 | 0.457161 | 0.027888 | 0.004116 | 0.004478 | 0.51577  | 0.382893 | 0.015076 | 0.020986 | 0.270734 | 0.000909 | 0.421218 |
| 0.001632 | 0.017649 | 0.014699 | 0.023221 | 0.012305 | 0.000771 | 0        | 0.0002   | 0.008805 | 0.013529 | 0        | 0.000864 | 0.004508 | 0        | 0.01183  |
| 0.018625 | 0.136495 | 0.008601 | 0.010153 | 0.017663 | 0.031001 | 0.05843  | 0.111305 | 0.041891 | 0.101379 | 0.009727 | 0.020117 | 0.115191 | 0.001019 | 0.007178 |
| 0.004001 | 0.005897 | 0.005508 | 0.000137 | 0.001061 | 0.024392 | 0.009977 | 0        | 5.04E-05 | 0.004848 | 0.030126 | 0        | 0.00031  | 7.12E-05 | 4.07E-05 |
| 0.147026 | 0.05651  | 0.257644 | 0.112942 | 0.11817  | 0.436903 | 0.080346 | 0.031549 | 0.041461 | 0.319436 | 0.265841 | 0.320521 | 0.388617 | 0.002979 | 0.267028 |
| 0.008146 | 0.00235  | 0.001927 | 0.00268  | 0.002524 | 0.010402 | 0.004155 | 0.007537 | 0.000404 | 0.001328 | 0.005624 | 0.005002 | 0.002478 | 0.000249 | 0.001799 |
| 0.004405 | 0.035745 | 0.015243 | 0.000996 | 0.001338 | 0.000246 | 0        | 0.000337 | 0        | 0.028962 | 0.004183 | 0        | 0        | 0        | 0.009596 |
| 0.003614 | 0.000997 | 0.008152 | 0.00694  | 0.000914 | 0.001388 | 0        | 0        | 0        | 0.002072 | 0.001371 | 4.60E-05 | 0.004216 | 7.39E-05 | 0.025983 |
| 0.003528 | 0.000706 | 0        | 0.000384 | 0.001389 | 0.002425 | 0        | 0        | 0        | 2.96E-05 | 0.000628 | 0        | 0        | 5.20E-05 | 0.001012 |
| 0.001868 | 0.004702 | 0.011481 | 0.037709 | 0.003725 | 0.010348 | 0.004526 | 0.002139 | 0.001568 | 0.001449 | 0.000566 | 0.018668 | 0.002784 | 0.00305  | 0.008293 |
| 0.006184 | 0.002252 | 0.007648 | 0.016198 | 0.002129 | 0.006439 | 0.002535 | 0.001183 | 0.000955 | 0.000384 | 0.000221 | 0.006582 | 0.00079  | 0.001706 | 0.004055 |
| 0.211988 | 0.122091 | 0.109869 | 0.03159  | 0.125404 | 0.038444 | 0.142445 | 0.010732 | 0.053421 | 0.005766 | 0.005297 | 0.388472 | 0.050941 | 0.00526  | 0.085798 |
| 0.0002   | 0.000429 | 0.000179 | 0.000523 | 0.000407 | 0.006968 | 0.000696 | 0.001229 | 0        | 0.000206 | 0.00061  | 0.001787 | 0        | 0.000197 | 0.000424 |

**Table S6. The corresponding LDA value and p value of the biomarkers in the discovery cohort**

| Biomaker_names                                                                                                            | Logarithm value | Groups | LDA_value   |
|---------------------------------------------------------------------------------------------------------------------------|-----------------|--------|-------------|
| d_Bacteria.p__Proteobacteria.c__Betaproteobacteria.o__Burkholderiales.f__Comamonadaceae.g__Tepidimonas                    | 0.59979213      |        |             |
| d_Bacteria.p__Proteobacteria.c__Betaproteobacteria.o__Burkholderiales.f__Alcaligenaceae.g__Sutterella                     | 0.626254801     |        |             |
| d_Bacteria.p__Proteobacteria.c__Betaproteobacteria.o__Burkholderiales.f__Comamonadaceae.g__Schlegelella                   | 1.000903839     |        |             |
| d_Bacteria.p__Proteobacteria.c__Gammaproteobacteria.o__Oceanospirillales.f__Halomonadaceae.g__Halomonas                   | 4.292290415     |        |             |
| d_Bacteria.p__Actinobacteria.c__Actinobacteria.o__Propionibacteriales.f__Propionibacteriaceae.g__Propionibacterium        | 1.136324132     |        |             |
| d_Bacteria.p__Firmicutes.c__Erysipelotrichia.o__Erysipelotrichales.f__Erysipelotrichaceae.g__Eggerthia                    | 0.519827994     |        |             |
| d_Bacteria.p__Proteobacteria.c__Betaproteobacteria.o__Burkholderiales.f__Comamonadaceae.g__Delftia                        | 1.14082218      |        |             |
| d_Bacteria.p__Proteobacteria.c__Gammaproteobacteria.o__Xanthomonadales.f__Xanthomonadaceae.g__Stenotrophomonas            | 1.631570589     |        |             |
| d_Bacteria.p__Firmicutes.c__Clostridia.o__Clostridiales.f__Lachnospiraceae.g__Stomatobaculum                              | 3.595411247     |        |             |
| d_Bacteria.p__Proteobacteria.c__Betaproteobacteria.o__Neisseriales.f__Neisseriaceae.g__Neisseriaceae_norank               | 0.428134794     |        |             |
| d_Bacteria.p__Firmicutes.c__Clostridia.o__Clostridiales.f__Lachnospiraceae.g__Lachnospiraceae_Incertae_Sedis              | 1.226170123     |        |             |
| d_Bacteria.p__Firmicutes.c__Clostridia.o__Clostridiales.f__Ruminococcaceae.g__Oscillibacter                               | 0.182081623     |        |             |
| d_Bacteria.p__Proteobacteria.c__Gammaproteobacteria.o__Xanthomonadales.f__Xanthomonadaceae.g__Silanimonas                 | 0.301029996     |        |             |
| d_Bacteria.p__Verrucomicrobia.c__Verrucomicrobiae.o__Verrucomicrobiales.f__Verrucomicrobiaceae.g__Akkermansia             | 0.361727836     |        |             |
| d_Bacteria.p__Fusobacteria.c__Fusobacteriia.o__Fusobacteriales.f__Leptotrichiaceae.g__Leptotrichiaceae_uncultured         | 1.637089274     |        |             |
| d_Bacteria.p__Proteobacteria.c__Gammaproteobacteria.o__Cardiobacteriales.f__Cardiobacteriaceae.g__Cardiobacterium         | 2.178833117     | HC     | 2.605033075 |
| d_Bacteria.p__Proteobacteria.c__Gammaproteobacteria.o__Xanthomonadales.f__Xanthomonadaceae.g__Thermomonas                 | 0               |        |             |
| d_Bacteria.p__Proteobacteria.c__Gammaproteobacteria.o__Aeromonadales.f__Aeromonadaceae.g__Aeromonas                       | 0.371837206     |        |             |
| d_Bacteria.p__Actinobacteria.c__Actinobacteria.o__Bifidobacteriales.f__Bifidobacteriaceae.g__Bifidobacterium              | 1.534924665     |        |             |
| d_Bacteria.p__Proteobacteria.c__Deltaproteobacteria.o__Desulfovibrionales.f__Desulfovibrionaceae.g__Bilophila             | 0.248177688     |        |             |
| d_Bacteria.p__Bacteroidetes.c__Flavobacteriia.o__Flavobacteriales.f__Flavobacteriaceae.g__Capnocytophaga                  | 3.676529766     |        |             |
| d_Bacteria.p__Firmicutes.c__Negativicutes.o__Selenomonadales.f__Veillonellaceae.g__Selenomonas                            | 3.37503839      | CP     | 2.743124157 |
| d_Bacteria.p__Actinobacteria.c__Actinobacteria.o__Actinomycetales.f__Actinomycetaceae.g__Mobiluncus                       | 1.679791171     |        |             |
| d_Bacteria.p__Firmicutes.c__Negativicutes.o__Selenomonadales.f__Veillonellaceae.g__Megamonas                              | 0.740362689     |        |             |
| d_Bacteria.p__Firmicutes.c__Clostridia.o__Clostridiales.f__Clostridiales_Family_XIII.g__Clostridiales_Family_XIII         | 1.225093804     |        |             |
| d_Bacteria.p__Firmicutes.c__Clostridia.o__Clostridiales.f__Clostridiales_Family_XIII.g__Clostridiales_Family_XIII_uncult  | 2.658526517     | HC     | 2.335415402 |
| d_Bacteria.p__Proteobacteria.c__Betaproteobacteria.o__Burkholderiales.f__Alcaligenaceae.g__Alcaligenes                    | 0.079181246     |        |             |
| d_Bacteria.p__Proteobacteria.c__Betaproteobacteria.o__Neisseriales.f__Neisseriaceae.g__Alysiella                          | 0.995635195     |        |             |
| d_Bacteria.p__Firmicutes.c__Erysipelotrichia.o__Erysipelotrichales.f__Erysipelotrichaceae.g__Erysipelotrichaceae_Incertae | 0.561796811     |        |             |
| d_Bacteria.p__Proteobacteria.c__Alphaproteobacteria.o__Sphingomonadales.f__DSSF69.g__DSSF69_norank                        | 0               |        |             |
| d_Bacteria.p__Firmicutes.c__Erysipelotrichia.o__Erysipelotrichales.f__Erysipelotrichaceae.g__Solobacterium                | 3.749449525     | HC     | 3.140046693 |
| d_Bacteria.p__Cyanobacteria.c__Cyanobacteria.o__Cyanobacteria_norank.f__Cyanobacteria_norank.g__Cyanobacteria_norank      | 2.503819045     |        |             |
| d_Bacteria.p__Firmicutes.c__Clostridia.o__Clostridiales.f__Peptostreptococcaceae.g__Filifactor                            | 2.721332381     | HC     | 2.278878468 |
| d_Bacteria.p__Actinobacteria.c__Actinobacteria.o__Bifidobacteriales.f__Bifidobacteriaceae.g__Gardnerella                  | 0               |        |             |
| d_Bacteria.p__Actinobacteria.c__Actinobacteria.o__Coriobacteriales.f__Coriobacteriaceae.g__Olsenella                      | 2.514547753     |        |             |
| d_Bacteria.p__Firmicutes.c__Bacilli.o__Bacillales.f__Paenibacillaceae.g__Brevibacillus                                    | 0               |        |             |
| d_Bacteria.p__Firmicutes.c__Negativicutes.o__Selenomonadales.f__Veillonellaceae.g__Centipeda                              | 2.111500548     |        |             |
| d_Bacteria.p__Deinococcus_Thermus.c__Deinococci.o__Thermales.f__Thermaceae.g__Thermus                                     | 0               |        |             |
| d_Bacteria.p__Spirochaetae.c__Spirochaetes.o__Spirochaetales.f__Spirochaetaceae.g__Treponema                              | 1.911157609     |        |             |
| d_Bacteria.p__Firmicutes.c__Bacilli.o__Bacillales.f__Listeriaceae.g__Brochothrix                                          | 0.176091259     |        |             |
| d_Bacteria.p__Firmicutes.c__Clostridia.o__Clostridiales.f__Peptostreptococcaceae.g__Peptostreptococcaceae_Incertae_Sedis  | 2.542277547     | HC     | 2.223372917 |
| d_Bacteria.p__Firmicutes.c__Clostridia.o__Clostridiales.f__Ruminococcaceae.g__Fastidiosipila                              | 0               |        |             |
| d_Bacteria.p__Proteobacteria.c__Gammaproteobacteria.o__Xanthomonadales.f__Xanthomonadaceae.g__Xanthomonadaceae            | 3.191696877     |        |             |
| d_Bacteria.p__Proteobacteria.c__Alphaproteobacteria.o__Rhizobiales.f__Phyllobacteriaceae.g__Aliihoeflea                   | 1.765668555     |        |             |
| d_Bacteria.p__Firmicutes.c__Negativicutes.o__Selenomonadales.f__Veillonellaceae.g__Veillonella                            | 5.13097803      |        |             |
| d_Bacteria.p__Proteobacteria.c__Gammaproteobacteria.o__Pseudomonadales.f__Moraxellaceae.g__Acinetobacter                  | 1.394305724     |        |             |
| d_Bacteria.p__Proteobacteria.c__Epsilonproteobacteria.o__Campylobacteriales.f__Campylobacteriaceae.g__Arcobacter          | 0.026328939     |        |             |
| d_Bacteria.p__Firmicutes.c__Clostridia.o__Clostridiales.f__Lachnospiraceae.g__Epulopiscium                                | 0               |        |             |
| d_Bacteria.p__Bacteroidetes.c__Bacteroidia.o__Bacteroidales.f__Porphyromonadaceae.g__Porphyromonas                        | 5.000741836     | HC     | 4.457226285 |
| d_Bacteria.p__Proteobacteria.c__Gammaproteobacteria.o__Enterobacteriales.f__Enterobacteriaceae.g__Rahnella                | 0.442610404     |        |             |
| d_Bacteria.p__Firmicutes.c__Clostridia.o__Clostridiales.f__Lachnospiraceae.g__Catonella                                   | 2.806925777     | HC     | 2.110720849 |
| d_Bacteria.p__Actinobacteria.c__Actinobacteria.o__Frankiales.f__Frankiales_uncultured.g__Frankiales_uncultured            | 0               |        |             |
| d_Bacteria.p__Firmicutes.c__Clostridia.o__Clostridiales.f__Eubacteriaceae.g__Eubacterium                                  | 0               |        |             |
| d_Bacteria.p__Bacteroidetes.c__Bacteroidia.o__Bacteroidales.f__Bacteroidales_Incertae_Sedis.g__Phocaecicola               | 1.282074274     |        |             |
| d_Bacteria.p__Bacteroidetes.c__Flavobacteriia.o__Flavobacteriales.f__Flavobacteriaceae.g__Empedobacter                    | 0               |        |             |
| d_Bacteria.p__Cyanobacteria.c__Cyanobacteria.o__SubsectionIII.f__FamilyI.g__Microcoleus                                   | 0               |        |             |

|                                                                                                                  |             |    |             |
|------------------------------------------------------------------------------------------------------------------|-------------|----|-------------|
| d_Bacteria.p_Bacteroidetes.c_Flavobacteriia.o_Flavobacteriales.f_Flavobacteriaceae.g_Elizabethingia              | 0           |    |             |
| d_Bacteria.p_Firmicutes.c_Clostridia.o_Clostridiales.f_Lachnospiraceae.g_Butyrvibrio                             | 2.411479407 |    |             |
| d_Bacteria.p_Firmicutes.c_Erysipelotrichia.o_Erysipelotrichales.f_Erysipelotrichaceae.g_Catenibacterium          | 0           |    |             |
| d_Bacteria.p_Firmicutes.c_Bacilli.o_Lactobacillales.f_Aerococcaceae.g_Aerococcus                                 | 0           |    |             |
| d_Bacteria.p_Bacteroidetes.c_Flavobacteriia.o_Flavobacteriales.f_Flavobacteriaceae.g_Chryseobacterium            | 0.506505032 |    |             |
| d_Bacteria.p_Proteobacteria.c_Alphaproteobacteria.o_Sphingomonadales.f_Sphingomonadaceae.g_Sphingobium           | 0.673941999 |    |             |
| d_Bacteria.p_Proteobacteria.c_Alphaproteobacteria.o_Rhodospirillales.f_Acetobacteraceae.g_Roseomonas             | 0           |    |             |
| d_Bacteria.p_Firmicutes.c_Clostridia.o_Clostridiales.f_Clostridiaceae.g_Clostridium_sensu_stricto                | 0.836956737 |    |             |
| d_Bacteria.p_Proteobacteria.c_Betaproteobacteria.o_Burkholderiales.f_Comamonadaceae.g_Aquabacterium              | 0           |    |             |
| d_Bacteria.p_Synergistetes.c_Synergistia.o_Synergistales.f_Synergistaceae.g_Fretibacterium                       | 1.146128036 |    |             |
| d_Bacteria.p_Proteobacteria.c_Alphaproteobacteria.o_Rhizobiales.f_Hyphomicrobiaceae.g_Pelagibacterium            | 3.270536765 |    |             |
| d_Bacteria.p_Proteobacteria.c_Gammaproteobacteria.o_Pasteurellales.f_Pasteurellaceae.g_Haemophilus               | 4.624765122 | HC | 4.228839403 |
| d_Bacteria.p_Firmicutes.c_Clostridia.o_Clostridiales.f_Clostridiales_Family_XI.g_Anaerococcus                    | 0           |    |             |
| d_Bacteria.p_Tenericutes.c_Mollicutes.o_RF9.f_RF9_norank.g_RF9_norank                                            | 1.692670699 |    |             |
| d_Bacteria.p_BD1_5.c_BD1_5_norank.o_BD1_5_norank.f_BD1_5_norank.g_BD1_5_norank                                   | 1.254789687 |    |             |
| d_Bacteria.p_Proteobacteria.c_Alphaproteobacteria.o_Rhodospirillales.f_Rhodospirillaceae.g_Thalassospira         | 0           |    |             |
| d_Bacteria.p_Proteobacteria.c_Alphaproteobacteria.o_Rhodobacterales.f_Rhodobacteraceae.g_Rhodobacter             | 0           |    |             |
| d_Bacteria.p_Firmicutes.c_Clostridia.o_Clostridiales.f_Clostridiales_Family_XI.g_Finegoldia                      | 0.45484486  |    |             |
| d_Bacteria.p_Deinococcus_Thermus.c_Deinococci.o_Deinococcales.f_Deinococcaceae.g_Deinococcus                     | 0.291886616 |    |             |
| d_Bacteria.p_Bacteroidetes.c_Bacteroidia.o_Bacteroidales.f_PeH15.g_PeH15_norank                                  | 0           |    |             |
| d_Bacteria.p_Tenericutes.c_Mollicutes.o_Mycoplasmatales.f_Mycoplasmataceae.g_Mycoplasma                          | 0.149219113 |    |             |
| d_Bacteria.p_Firmicutes.c_Clostridia.o_Clostridiales.f_Christensenellaceae.g_Christensenella                     | 0           |    |             |
| d_Bacteria.p_Proteobacteria.c_Gammaproteobacteria.o_Pasteurellales.f_Pasteurellaceae.g_Actinobacillus            | 1.431524584 |    |             |
| d_Bacteria.p_Proteobacteria.c_Alphaproteobacteria.o_Sphingomonadales.f_Sphingomonadaceae.g_Sphingomonas          | 1.003029471 |    |             |
| d_Bacteria.p_Proteobacteria.c_Betaproteobacteria.o_Hydrogenophilales.f_Hydrogenophilaceae.g_Tepidiphilus         | 0           |    |             |
| d_Bacteria.p_Firmicutes.c_Clostridia.o_Clostridiales.f_Lachnospiraceae.g_Pseudobutyrvibrio                       | 1.308653326 |    |             |
| d_Bacteria.p_Proteobacteria.c_Betaproteobacteria.o_Neisseriales.f_Neisseriaceae.g_Neisseria                      | 5.224205179 |    |             |
| d_Bacteria.p_Firmicutes.c_Negativicutes.o_Selenomonadales.f_Veillonellaceae.g_Anaeroglobus                       | 1.324796718 |    |             |
| d_Bacteria.p_Actinobacteria.c_Actinobacteria.o_Coriobacteriales.f_Coriobacteriaceae.g_Enterorhabdus              | 0           |    |             |
| d_Bacteria.p_Proteobacteria.c_Gammaproteobacteria.o_Pseudomonadales.f_Moraxellaceae.g_Psychrobacter              | 0           |    |             |
| d_Bacteria.p_Firmicutes.c_Bacilli.o_Bacillales.f_Bacillaceae.g_Anoxybacillus                                     | 0           |    |             |
| d_Bacteria.p_Proteobacteria.c_Gammaproteobacteria.o_Enterobacteriales.f_Enterobacteriaceae.g_Enterobacter        | 0           |    |             |
| d_Bacteria.p_Firmicutes.c_Clostridia.o_Clostridiales.f_Clostridiales_Family_XI.g_Parvimonas                      | 3.273866682 | HC | 2.866155639 |
| d_Bacteria.p_Proteobacteria.c_Alphaproteobacteria.o_Caulobacterales.f_Caulobacteraceae.g_Brevundimonas           | 0.854306042 |    |             |
| d_Bacteria.p_Firmicutes.c_Clostridia.o_Clostridiales.f_vadinBB60.g_vadinBB60_norank                              | 0.854913022 |    |             |
| d_Bacteria.p_Actinobacteria.c_Actinobacteria.o_Corynebacteriales.f_Corynebacteriaceae.g_Corynebacterium          | 3.366075383 | HC | 3.056814859 |
| d_Bacteria.p_Proteobacteria.c_Betaproteobacteria.o_Rhodocyclales.f_Rhodocyclaceae.g_Sulfuritalea                 | 0           |    |             |
| d_Bacteria.p_Firmicutes.c_Clostridia.o_Clostridiales.f_Clostridiales_Family_XI.g_Murdochella                     | 0.45547933  |    |             |
| d_Bacteria.p_Actinobacteria.c_Actinobacteria.o_Micrococcales.f_Microbacteriaceae.g_Frigoribacterium              | 0           |    |             |
| d_Bacteria.p_Proteobacteria.c_Epsilonproteobacteria.o_Campylobacterales.f_Campylobacteraceae.g_Campylobacter     | 3.473590361 | CP | 3.268475029 |
| d_Bacteria.p_Chloroflexi.c_Anaerolineae.o_Anaerolineales.f_Anaerolineaceae.g_Anaerolineaceae_uncultured          | 0.670941281 |    |             |
| d_Bacteria.p_Firmicutes.c_Clostridia.o_Clostridiales.f_Lachnospiraceae.g_Oribacterium                            | 3.917184528 | HC | 3.357472781 |
| d_Bacteria.p_Firmicutes.c_Bacilli.o_Lactobacillales.f_Enterococcaceae.g_Vagococcus                               | 0           |    |             |
| d_Bacteria.p_Firmicutes.c_Negativicutes.o_Selenomonadales.f_Veillonellaceae.g_Dialister                          | 2.277465954 |    |             |
| d_Bacteria.p_Firmicutes.c_Clostridia.o_Clostridiales.f_Christensenellaceae.g_Christensenellaceae_uncultured      | 1.055378331 |    |             |
| d_Bacteria.p_Lentisphaerae.c_Lentisphaeria.o_Victivallales.f_Victivallaceae.g_Victivallis                        | 0           |    |             |
| d_Bacteria.p_Actinobacteria.c_Actinobacteria.o_Propionibacteriales.f_Nocardioideae.g_Nocardioides                | 0           |    |             |
| d_Bacteria.p_Proteobacteria.c_Gammaproteobacteria.o_Enterobacteriales.f_Enterobacteriaceae.g_Escherichia_Shigell | 1.545183368 |    |             |
| d_Bacteria.p_Firmicutes.c_Clostridia.o_Clostridiales.f_Clostridiales_Family_XI.g_Clostridiales_Family_XI         | 0           |    |             |
| d_Bacteria.p_Fusobacteria.c_Fusobacteriia.o_Fusobacteriales.f_ASCC02.g_ASCC02_norank                             | 2.839726758 | CP | 2.200654588 |
| d_Bacteria.p_Firmicutes.c_Bacilli.o_Bacillales.f_Paenibacillaceae.g_Paenibacillus                                | 0.227243782 |    |             |
| d_Bacteria.p_Bacteroidetes.c_Bacteroidia.o_Bacteroidales.f_p_2534_18B5_gut_group.g_p_2534_18B5_gut_group_n       | 0           |    |             |
| d_Bacteria.p_Spirochaetae.c_Spirochaetes.o_Spirochaetales.f_Spirochaetaceae.g_Spirochaeta                        | 0.170017111 |    |             |
| d_Bacteria.p_Proteobacteria.c_Gammaproteobacteria.o_Pasteurellales.f_Pasteurellaceae.g_Aggregatibacter           | 2.116508124 |    |             |
| d_Bacteria.p_Proteobacteria.c_Betaproteobacteria.o_Neisseriales.f_Neisseriaceae.g_Snodgrassella                  | 0           |    |             |
| d_Bacteria.p_Proteobacteria.c_Betaproteobacteria.o_Burkholderiales.f_Burkholderiaceae.g_Lautropia                | 2.60948769  |    |             |
| d_Bacteria.p_Proteobacteria.c_Gammaproteobacteria.o_Xanthomonadales.f_Xanthomonadaceae.g_Pseudoxanthomon         | 0           |    |             |
| d_Bacteria.p_Proteobacteria.c_Alphaproteobacteria.o_Rhizobiales.f_Methylobacteriaceae.g_Methylobacterium         | 0.862727528 |    |             |

|                                                                                                                           |             |    |             |
|---------------------------------------------------------------------------------------------------------------------------|-------------|----|-------------|
| d__Bacteria.p__Proteobacteria.c__Betaproteobacteria.o__Burkholderiales.f__Comamonadaceae.g__Comamonas                     | 1.01911629  |    |             |
| d__Bacteria.p__Firmicutes.c__Bacilli.o__Lactobacillales.f__Carnobacteriaceae.g__Atopostipes                               | 0.318758763 |    |             |
| d__Bacteria.p__Actinobacteria.c__Actinobacteria.o__Micrococcales.f__Micrococcaceae.g__Rothia                              | 4.878759415 |    |             |
| d__Bacteria.p__Proteobacteria.c__Betaproteobacteria.o__Burkholderiales.f__Alcaligenaceae.g__Parasutterella                | 0           |    |             |
| d__Bacteria.p__Firmicutes.c__Bacilli.o__Lactobacillales.f__Aerococcaceae.g__Abiotrophia                                   | 1.91458554  |    |             |
| d__Bacteria.p__Proteobacteria.c__Betaproteobacteria.o__Rhodocyclales.f__Rhodocyclaceae.g__Propionivibrio                  | 0.096910013 |    |             |
| d__Bacteria.p__Actinobacteria.c__Actinobacteria.o__Corynebacteriales.f__Corynebacteriaceae.g__Corynebacteriaceae_uncu     | 0           |    |             |
| d__Bacteria.p__Firmicutes.c__Clostridia.o__Clostridiales.f__Lachnospiraceae.g__Blautia                                    | 1.491361694 |    |             |
| d__Bacteria.p__Bacteroidetes.c__Bacteroidia.o__Bacteroidales.f__Rikenellaceae.g__RC9_gut_group                            | 1.731508184 |    |             |
| d__Bacteria.p__Firmicutes.c__Clostridia.o__Clostridiales.f__Lachnospiraceae.g__Coprococcus                                | 0.339948062 |    |             |
| d__Bacteria.p__Proteobacteria.c__Betaproteobacteria.o__Burkholderiales.f__Burkholderiaceae.g__Ralstonia                   | 0           |    |             |
| d__Bacteria.p__Cyanobacteria.c__Cyanobacteria.o__SubsectionII.f__FamilyII.g__Chroococcidiopsis                            | 0           |    |             |
| d__Bacteria.p__Bacteroidetes.c__Bacteroidia.o__Bacteroidales.f__Porphyromonadaceae.g__Odoribacter                         | 0           |    |             |
| d__Bacteria.p__Proteobacteria.c__Alphaproteobacteria.o__Sphingomonadales.f__Sphingomonadaceae.g__Novosphingobium          | 0.051152522 |    |             |
| d__Bacteria.p__Firmicutes.c__Bacilli.o__Lactobacillales.f__Streptococcaceae.g__Streptococcus                              | 4.941759963 | HC | 4.037712943 |
| d__Bacteria.p__Actinobacteria.c__Actinobacteria.o__Actinomycetales.f__Actinomycetaceae.g__Actinobaculum                   | 1.935444284 |    |             |
| d__Bacteria.p__Proteobacteria.c__Deltaproteobacteria.o__Desulfovibrionales.f__Desulfovibrionaceae.g__Desulfovibrio        | 0.36361198  |    |             |
| d__Bacteria.p__Proteobacteria.c__Gammaproteobacteria.o__Pseudomonadales.f__Moraxellaceae.g__Enhydrobacter                 | 0.247973266 |    |             |
| d__Bacteria.p__Proteobacteria.c__Alphaproteobacteria.o__Rickettsiales.f__mitochondria.g__mitochondria_norank              | 1.77375598  |    |             |
| d__Bacteria.p__Proteobacteria.c__Gammaproteobacteria.o__Alteromonadales.f__Pseudoalteromonadaceae.g__Pseudoalteror        | 0           |    |             |
| d__Bacteria.p__Proteobacteria.c__Gammaproteobacteria.o__Chromatiales.f__Chromatiaceae.g__Rheinheimera                     | 0           |    |             |
| d__Bacteria.p__Bacteroidetes.c__Bacteroidia.o__Bacteroidales.f__Prevotellaceae.g__Alloprevotella                          | 3.39604409  |    |             |
| d__Bacteria.p__Bacteroidetes.c__Bacteroidia.o__Bacteroidales.f__Prevotellaceae.g__Paraprevotella                          | 0           |    |             |
| d__Bacteria.p__Firmicutes.c__Bacilli.o__Lactobacillales.f__Carnobacteriaceae.g__Dolosigranulum                            | 0           |    |             |
| d__Bacteria.p__Firmicutes.c__Clostridia.o__Clostridiales.f__Ruminococcaceae.g__Subdoligranulum                            | 1.586812269 |    |             |
| d__Bacteria.p__Firmicutes.c__Bacilli.o__Lactobacillales.f__Leuconostocaceae.g__Weissella                                  | 0.025305865 |    |             |
| d__Bacteria.p__Firmicutes.c__Clostridia.o__Clostridiales.f__Lachnospiraceae.g__Lachnospiraceae_uncultured                 | 3.185004738 |    |             |
| d__Bacteria.p__Actinobacteria.c__Actinobacteria.o__Micrococcales.f__Micrococcaceae.g__Nesterenkonia                       | 1.655522596 |    |             |
| d__Bacteria.p__Firmicutes.c__Clostridia.o__Clostridiales.f__Ruminococcaceae.g__Papillibacter                              | 0           |    |             |
| d__Bacteria.p__Candidate_division_TM7.c__Candidate_division_TM7_norank.o__Candidate_division_TM7_norank.f__Can            | 3.921121786 | HC | 3.414882596 |
| d__Bacteria.p__Firmicutes.c__Clostridia.o__Clostridiales.f__Clostridiales_Family_XIII.g__Clostridiales_Family_XIII_Incert | 3.988295357 | HC | 3.595917216 |
| d__Bacteria.p__Firmicutes.c__Erysipelotrichia.o__Erysipelotrichales.f__Erysipelotrichaceae.g__Holdemania                  | 0           |    |             |
| d__Bacteria.p__Bacteroidetes.c__Bacteroidia.o__Bacteroidales.f__Prevotellaceae.g__Prevotellaceae_uncultured               | 1.39938525  |    |             |
| d__Bacteria.p__Proteobacteria.c__Gammaproteobacteria.o__Enterobacteriales.f__Enterobacteriaceae.g__Citrobacter            | 3.69985933  |    |             |
| d__Bacteria.p__Firmicutes.c__Clostridia.o__Clostridiales.f__Lachnospiraceae.g__Roseburia                                  | 0.751728053 |    |             |
| d__Bacteria.p__Synergistetes.c__Synergistia.o__Synergistales.f__Synergistaceae.g__Synergistes                             | 0           |    |             |
| d__Bacteria.p__Actinobacteria.c__Actinobacteria.o__Coriobacteriales.f__Coriobacteriaceae.g__Adlercreutzia                 | 0           |    |             |
| d__Bacteria.p__Firmicutes.c__Erysipelotrichia.o__Erysipelotrichales.f__Erysipelotrichaceae.g__Erysipelotrichaceae_uncultu | 0.720985744 |    |             |
| d__Bacteria.p__Firmicutes.c__Bacilli.o__Lactobacillales.f__Leuconostocaceae.g__Leuconostoc                                | 0.530946367 |    |             |
| d__Bacteria.p__Firmicutes.c__Clostridia.o__Clostridiales.f__Deffluviitaleaceae.g__Deffluviitaleaceae_Incertae_Sedis       | 0           |    |             |
| d__Bacteria.p__Actinobacteria.c__Actinobacteria.o__Corynebacteriales.f__Mycobacteriaceae.g__Mycobacterium                 | 0           |    |             |
| d__Bacteria.p__Firmicutes.c__Negativicutes.o__Selenomonadales.f__Acidaminococcaceae.g__Acidaminococcus                    | 0           |    |             |
| d__Bacteria.p__Bacteroidetes.c__Bacteroidia.o__Bacteroidales.f__Porphyromonadaceae.g__Parabacteroides                     | 1.165714088 |    |             |
| d__Bacteria.p__Bacteroidetes.c__Flavobacteriia.o__Flavobacteriales.f__Flavobacteriaceae.g__Bergeyella                     | 2.574991444 |    |             |
| d__Bacteria.p__Firmicutes.c__Negativicutes.o__Selenomonadales.f__Veillonellaceae.g__Veillonellaceae_uncultured            | 0.525584639 |    |             |
| d__Bacteria.p__Actinobacteria.c__Actinobacteria.o__Micrococcales.f__Micrococcaceae.g__Kocuria                             | 0.182081623 |    |             |
| d__Bacteria.p__Firmicutes.c__Erysipelotrichia.o__Erysipelotrichales.f__Erysipelotrichaceae.g__Asteroleplasma              | 0.583576586 |    |             |
| d__Bacteria.p__Actinobacteria.c__Actinobacteria.o__Bifidobacteriales.f__Bifidobacteriaceae.g__Parascardovia               | 1.049541038 |    |             |
| d__Bacteria.p__Bacteroidetes.c__Bacteroidia.o__Bacteroidales.f__Porphyromonadaceae.g__Butyrlicimonas                      | 0           |    |             |
| d__Bacteria.p__Firmicutes.c__Negativicutes.o__Selenomonadales.f__Veillonellaceae.g__Allisonella                           | 1.065392962 |    |             |
| d__Bacteria.p__Firmicutes.c__Clostridia.o__Clostridiales.f__Clostridiales_Family_XI.g__Clostridiales_Family_XI_unculture  | 0           |    |             |
| d__Bacteria.p__Firmicutes.c__Clostridia.o__Clostridiales.f__Syntrophomonadaceae.g__Pelospora                              | 0           |    |             |
| d__Bacteria.p__Firmicutes.c__Clostridia.o__Clostridiales.f__Lachnospiraceae.g__Lachnoanaerobaculum                        | 4.034902394 |    |             |
| d__Bacteria.p__Proteobacteria.c__Gammaproteobacteria.o__Vibrionales.f__Vibrionaceae.g__Photobacterium                     | 0           |    |             |
| d__Bacteria.p__Bacteroidetes.c__Bacteroidia.o__Bacteroidales.f__Porphyromonadaceae.g__Paludibacter                        | 1.967216357 |    |             |
| d__Bacteria.p__Firmicutes.c__Clostridia.o__Clostridiales.f__Ruminococcaceae.g__Flavonifractor                             | 0           |    |             |
| d__Bacteria.p__Bacteroidetes.c__Bacteroidia.o__Bacteroidales.f__Rikenellaceae.g__Blvii28_wastewater_sludge_group          | 0.698970004 |    |             |
| d__Bacteria.p__Fusobacteria.c__Fusobacteriia.o__Fusobacteriales.f__Leptotrichiaceae.g__Leptotrichia                       | 4.989783976 | CP | 4.512200219 |

|                                                                                                                 |             |    |             |
|-----------------------------------------------------------------------------------------------------------------|-------------|----|-------------|
| d_Bacteria.p__Proteobacteria.c__Betaproteobacteria.o__Rhodocyclales.f__Rhodocyclaceae.g__Methyloversatilis      | 0.526339277 |    |             |
| d_Bacteria.p__Candidate_division_TM7.c__Candidate_division_TM7_Unknown.o__Candidate_division_TM7_Unknown.f__    | 2.862638158 | HC | 3.452366314 |
| d_Bacteria.p__Bacteroidetes.c__Cytophagia.o__Cytophagales.f__Cytophagaceae.g__Hymenobacter                      | 0           |    |             |
| d_Bacteria.p__Actinobacteria.c__Actinobacteria.o__Frankiales.f__Geodermatophilaceae.g__Modestobacter            | 0           |    |             |
| d_Bacteria.p__Proteobacteria.c__Gammaproteobacteria.o__Enterobacteriales.f__Enterobacteriaceae.g__Serratia      | 1.621902961 |    |             |
| d_Bacteria.p__Actinobacteria.c__Actinobacteria.o__Coriobacteriales.f__Coriobacteriaceae.g__Atopobium            | 3.357265747 |    |             |
| d_Bacteria.p__Firmicutes.c__Bacilli.o__Lactobacillales.f__Carnobacteriaceae.g__Granulicatella                   | 4.210796569 | CP | 3.423367607 |
| d_Bacteria.p__Proteobacteria.c__Betaproteobacteria.o__Burkholderiales.f__Comamonadaceae.g__Acidovorax           | 1.184407485 |    |             |
| d_Bacteria.p__Proteobacteria.c__Gammaproteobacteria.o__Alteromonadales.f__Shewanellaceae.g__Shewanella          | 1.04630002  |    |             |
| d_Bacteria.p__Firmicutes.c__Clostridia.o__Clostridiales.f__Lachnospiraceae.g__Johnsonella                       | 2.648847708 |    |             |
| d_Bacteria.p__Tenericutes.c__Mollicutes.o__NB1_n.f__NB1_n_norank.g__NB1_n_norank                                | 0           |    |             |
| d_Bacteria.p__Synergistetes.c__Synergistia.o__Synergistales.f__Synergistaceae.g__Synergistaceae_uncultured      | 1.143535225 |    |             |
| d_Bacteria.p__Proteobacteria.c__Betaproteobacteria.o__Neisseriales.f__Neisseriaceae.g__Kingella                 | 2.802274741 |    |             |
| d_Bacteria.p__Planctomycetes.c__Phycisphaerae.o__Phycisphaerales.f__Phycisphaeraceae.g__SM1A02                  | 0           |    |             |
| d_Bacteria.p__Firmicutes.c__Clostridia.o__Clostridiales.f__Peptococcaceae.g__Peptococcus                        | 1.602168551 |    |             |
| d_Bacteria.p__Proteobacteria.c__Gammaproteobacteria.o__Pseudomonadales.f__Moraxellaceae.g__Moraxella            | 1.071882007 |    |             |
| d_Bacteria.p__Candidate_division_WS6.c__Candidate_division_WS6_norank.o__Candidate_division_WS6_norank.f__Can   | 0           |    |             |
| d_Bacteria.p__Firmicutes.c__Clostridia.o__Clostridiales.f__Lachnospiraceae.g__Dorea                             | 0           |    |             |
| d_Bacteria.p__Proteobacteria.c__Deltaproteobacteria.o__Desulfobacterales.f__Desulfobulbaceae.g__Desulfobulbus   | 0.638905049 |    |             |
| d_Bacteria.p__Actinobacteria.c__Acidimicrobia.o__Acidimicrobiales.f__Iamiaceae.g__Iamia                         | 0           |    |             |
| d_Bacteria.p__Candidate_division_SR1.c__Candidate_division_SR1_norank.o__Candidate_division_SR1_norank.f__Candi | 3.470733813 | HC | 3.305349108 |
| d_Bacteria.p__Firmicutes.c__Clostridia.o__Clostridiales.f__Ruminococcaceae.g__Ruminococcaceae_uncultured        | 3.07253267  | CP | 2.337019815 |
| d_Bacteria.p__Firmicutes.c__Bacilli.o__Bacillales.f__Bacillales_Family_XI.g__Gemella                            | 3.770267898 | HC | 3.031314755 |
| d_Bacteria.p__Firmicutes.c__Clostridia.o__Clostridiales.f__Ruminococcaceae.g__Ruminococcus                      | 1.21029622  |    |             |
| d_Bacteria.p__Firmicutes.c__Bacilli.o__Lactobacillales.f__Streptococcaceae.g__Lactococcus                       | 0.34814254  |    |             |
| d_Bacteria.p__Bacteroidetes.c__Flavobacteriia.o__Flavobacteriales.f__Flavobacteriaceae.g__Flavobacterium        | 0           |    |             |
| d_Bacteria.p__Firmicutes.c__Clostridia.o__Clostridiales.f__Ruminococcaceae.g__Anaerofilum                       | 0           |    |             |
| d_Bacteria.p__Fusobacteria.c__Fusobacteriia.o__Fusobacteriales.f__Fusobacteriaceae.g__Fusobacterium             | 4.788759077 | HC | 4.193566951 |
| d_Bacteria.p__Actinobacteria.c__Actinobacteria.o__Coriobacteriales.f__Coriobacteriaceae.g__Cryptobacterium      | 0.743509765 |    |             |
| d_Bacteria.p__Proteobacteria.c__Gammaproteobacteria.o__Pseudomonadales.f__Moraxellaceae.g__Perlucidibaca        | 0           |    |             |
| d_Bacteria.p__Actinobacteria.c__Actinobacteria.o__Bifidobacteriales.f__Bifidobacteriaceae.g__Scardovia          | 1.959438916 |    |             |
| d_Bacteria.p__Firmicutes.c__Negativicutes.o__Selenomonadales.f__Veillonellaceae.g__Mitsuokella                  | 0           |    |             |
| d_Bacteria.p__Bacteroidetes.c__Bacteroidia.o__Bacteroidales.f__Bacteroidaceae.g__Bacteroides                    | 2.143665234 |    |             |
| d_Bacteria.p__Firmicutes.c__Bacilli.o__Bacillales.f__Bacillaceae.g__Bacillus                                    | 0           |    |             |
| d_Bacteria.p__Actinobacteria.c__Actinobacteria.o__Bifidobacteriales.f__Bifidobacteriaceae.g__Alloscardovia      | 1.925140128 |    |             |
| d_Bacteria.p__Proteobacteria.c__Alphaproteobacteria.o__Rhizobiales.f__Phyllobacteriaceae.g__Aquamicrobium       | 1.355068206 |    |             |
| d_Bacteria.p__Synergistetes.c__Synergistia.o__Synergistales.f__Synergistaceae.g__Pyramidobacter                 | 1.071575194 |    |             |
| d_Bacteria.p__Bacteroidetes.c__Bacteroidia.o__Bacteroidales.f__Rikenellaceae.g__Alistipes                       | 0.926213786 |    |             |
| d_Bacteria.p__Firmicutes.c__Clostridia.o__Clostridiales.f__Lachnospiraceae.g__Anaerostipes                      | 1.322219295 |    |             |
| d_Bacteria.p__Firmicutes.c__Clostridia.o__Clostridiales.f__Lachnospiraceae.g__Howardella                        | 0.846955325 |    |             |
| d_Bacteria.p__Actinobacteria.c__Actinobacteria.o__Coriobacteriales.f__Coriobacteriaceae.g__Collinsella          | 0.253257214 |    |             |
| d_Bacteria.p__Proteobacteria.c__Betaproteobacteria.o__Neisseriales.f__Neisseriaceae.g__Eikenella                | 2.131672119 |    |             |
| d_Bacteria.p__Proteobacteria.c__Betaproteobacteria.o__Burkholderiales.f__Oxalobacteraceae.g__Massilia           | 0           |    |             |
| d_Bacteria.p__Firmicutes.c__Negativicutes.o__Selenomonadales.f__Acidaminococcaceae.g__Phascolarctobacterium     | 0.788580779 |    |             |
| d_Bacteria.p__Firmicutes.c__Clostridia.o__Clostridiales.f__Lachnospiraceae.g__Moryella                          | 0.960232873 |    |             |
| d_Bacteria.p__Proteobacteria.c__Betaproteobacteria.o__Burkholderiales.f__Oxalobacteraceae.g__Janthinobacterium  | 0.043034632 |    |             |
| d_Bacteria.p__Proteobacteria.c__Gammaproteobacteria.o__Pseudomonadales.f__Pseudomonadaceae.g__Pseudomonas       | 1.772761647 |    |             |
| d_Bacteria.p__Firmicutes.c__Clostridia.o__Clostridiales.f__Ruminococcaceae.g__Faecalibacterium                  | 1.823734988 |    |             |
| d_Bacteria.p__Actinobacteria.c__Actinobacteria.o__Micrococcales.f__Cellulomonadaceae.g__Cellulomonas            | 0           |    |             |
| d_Bacteria.p__Firmicutes.c__Bacilli.o__Lactobacillales.f__P5D1_392.g__P5D1_392_norank                           | 0.667452953 |    |             |
| d_Bacteria.p__Bacteroidetes.c__Sphingobacteriia.o__Sphingobacteriales.f__WCHB1_69.g__WCHB1_69_norank            | 0.522878745 |    |             |
| d_Bacteria.p__Proteobacteria.c__Gammaproteobacteria.o__Chromatiales.f__Granulosicoccaceae.g__Granulosicoccus    | 0           |    |             |
| d_Bacteria.p__Firmicutes.c__Negativicutes.o__Selenomonadales.f__Veillonellaceae.g__Megaspheara                  | 3.669980911 | CP | 3.281900058 |
| d_Bacteria.p__Proteobacteria.c__Alphaproteobacteria.o__Rhodobacterales.f__Rhodobacteraceae.g__Paracoccus        | 0.613841822 |    |             |
| d_Bacteria.p__Bacteroidetes.c__Bacteroidia.o__Bacteroidales.f__Porphyromonadaceae.g__Tannerella                 | 2.97624487  | CP | 2.243167598 |
| d_Bacteria.p__Firmicutes.c__Clostridia.o__Clostridiales.f__Defluviitaleaceae.g__Defluviitaleaceae_uncultured    | 1.612783857 |    |             |
| d_Bacteria.p__Bacteroidetes.c__Bacteroidia.o__Bacteroidales.f__Prevotellaceae.g__Prevotella                     | 5.328794839 |    |             |
| d_Bacteria.p__Actinobacteria.c__Actinobacteria.o__Coriobacteriales.f__Coriobacteriaceae.g__Slackia              | 0.733732111 |    |             |

|                                                                                                                         |             |    |             |
|-------------------------------------------------------------------------------------------------------------------------|-------------|----|-------------|
| d__Bacteria.p__Firmicutes.c__Bacilli.o__Lactobacillales.f__Lactobacillaceae.g__Lactobacillus                            | 2.651888312 |    |             |
| d__Bacteria.p__Firmicutes.c__Clostridia.o__Clostridiales.f__Peptostreptococcaceae.g__Peptostreptococcus                 | 4.067330164 | HC | 3.460728022 |
| d__Bacteria.p__Proteobacteria.c__Alphaproteobacteria.o__Rhizobiales.f__Bradyrhizobiaceae.g__Bradyrhizobium              | 0.152288344 |    |             |
| d__Bacteria.p__Firmicutes.c__Clostridia.o__Clostridiales.f__Ruminococcaceae.g__Ruminococcaceae_Incertae_Sedis           | 0.716698771 |    |             |
| d__Bacteria.p__Actinobacteria.c__Actinobacteria.o__Pseudonocardiales.f__Pseudonocardaceae.g__Actinomycetospira          | 0           |    |             |
| d__Bacteria.p__Bacteroidetes.c__Bacteroidia.o__Bacteroidales.f__S24_7.g__S24_7_norank                                   | 0.51741585  |    |             |
| d__Bacteria.p__Firmicutes.c__Clostridia.o__Clostridiales.f__Lachnospiraceae.g__Lachnospira                              | 0.683947131 |    |             |
| d__Bacteria.p__Proteobacteria.c__Alphaproteobacteria.o__Caulobacterales.f__Hyphomonadaceae.g__Hyphomonadaceae_no        | 2.26620817  |    |             |
| d__Bacteria.p__Proteobacteria.c__Betaproteobacteria.o__Burkholderiales.f__Alcaligenaceae.g__Achromobacter               | 0.737987326 |    |             |
| d__Bacteria.p__Bacteroidetes.c__Bacteroidia.o__Bacteroidales.f__BS11_gut_group.g__BS11_gut_group_norank                 | 0           |    |             |
| d__Bacteria.p__Firmicutes.c__Clostridia.o__Clostridiales.f__Lachnospiraceae.g__Shuttleworthia                           | 2.176573541 |    |             |
| d__Bacteria.p__Actinobacteria.c__Actinobacteria.o__Coriobacteriales.f__Coriobacteriaceae.g__Coriobacteriaceae_unculture | 0.227243782 |    |             |
| d__Bacteria.p__Actinobacteria.c__Actinobacteria.o__Corynebacteriales.f__Nocardaceae.g__Rhodococcus                      | 1.919653282 |    |             |
| d__Bacteria.p__Firmicutes.c__Clostridia.o__Clostridiales.f__Ruminococcaceae.g__Anaerotruncus                            | 0           |    |             |
| d__Bacteria.p__Firmicutes.c__Clostridia.o__Clostridiales.f__Clostridiales_Family_XIII.g__Mogibacterium                  | 1.777426822 | HC | 2.160228717 |
| d__Bacteria.p__Firmicutes.c__Clostridia.o__Clostridiales.f__Ruminococcaceae.g__Intestinimonas                           | 0           |    |             |
| d__Bacteria.p__Actinobacteria.c__Actinobacteria.o__Actinomycetales.f__Actinomycetaceae.g__Actinomyces                   | 4.724821918 |    |             |
| d__Bacteria.p__Actinobacteria.c__Actinobacteria.o__Micrococcales.f__Micrococcaceae.g__Arthrobacter                      | 0.232572615 |    |             |
| d__Bacteria.p__Firmicutes.c__Bacilli.o__Lactobacillales.f__16d63_751.g__16d63_751_norank                                | 2.014394516 | HC | 3.161508566 |
| d__Bacteria.p__Proteobacteria.c__Alphaproteobacteria.o__Rhizobiales.f__Bradyrhizobiaceae.g__Bosea                       | 0.136720567 |    |             |
| d__Bacteria.p__Firmicutes.c__Erysipelotrichia.o__Erysipelotrichales.f__Erysipelotrichaceae.g__Bulleidia                 | 0.82672252  |    |             |
| d__Bacteria.p__Firmicutes.c__Bacilli.o__Bacillales.f__Staphylococcaceae.g__Staphylococcus                               | 0.765916794 |    |             |
| d__Bacteria.p__Firmicutes.c__Bacilli.o__Bacillales.f__Bacillales_Family_XII.g__Exiguobacterium                          | 0.514658415 |    |             |



-  
-  
-  
-  
-  
-  
-  
-  
-  
-  
-  
8.22E-11  
-  
-  
-  
-  
-  
-  
-  
-  
-  
-  
-  
-  
-  
-  
-  
-  
-  
-  
-  
-  
-  
-  
-  
-  
3.56E-07  
-  
-  
0.000711006  
-  
-  
-  
5.79E-05  
-  
2.90E-06  
-  
-  
-  
-  
-  
-  
-  
9.15E-06  
-  
-  
-  
3.15E-08  
-  
-  
-  
-

-  
-  
-  
-  
-  
-  
-  
-  
-  
-  
-  
-  
-  
-  
-  
-  
0.017127236  
-  
-  
-  
-  
-  
-  
-  
-  
-  
-  
-  
-  
-  
-  
-  
-  
8.84E-05  
5.76E-11  
-  
-  
-  
-  
-  
-  
-  
-  
-  
-  
-  
-  
-  
-  
-  
-  
2.97E-07  
-  
-  
-  
-  
-  
-  
-  
-  
-  
-  
-  
-  
-  
-  
-  
0.007947045

[illegible]

-  
4.39E-06  
-  
-  
-  
-  
-  
-  
-  
-  
-  
-  
-  
-  
1.16E-07  
-  
-  
-  
0.007339648  
-  
-  
-  
-

Table S7. the corresponding output value and POD value of each optimal microbial marker in the discovery cohort

| OTU1721        | OTU1277         | OTU1642       | OTU1868      | OTU1086                      | OTU1454         | OTU2268         | OTU648         | group       | POD value   |
|----------------|-----------------|---------------|--------------|------------------------------|-----------------|-----------------|----------------|-------------|-------------|
| (Candidate_div | (Actinomycetes) | (Haemophilus) | (Prevotella) | (Family_XIII_Incertae_Sedis) | (Fusobacterium) | (ASCC02_norank) | (Oribacterium) |             |             |
| (Data)         | ision_TM7_no    |               |              |                              |                 |                 |                |             |             |
| (rank)         |                 |               |              |                              |                 |                 |                |             |             |
| 1              | 4.00E-05        | 0.001383      | 0.002222     | 0.002176                     | 0.005501        | 2.36E-04        | 9.70E-05       | 9.89E-04 HC | 0.093596059 |
| 2              | 4.86E-04        | 0.00174       | 0.056011     | 0.041554                     | 0.029714        | 0.002094        | 3.40E-04       | 0.004038 HC | 0           |
| 3              | 0.003885        | 5.55E-04      | 0.040973     | 0.083988                     | 3.49E-04        | 0.002925        | 0.002641       | 0.006833 HC | 0.167108753 |
| 4              | 1.87E-04        | 0.006559      | 0.011443     | 0.004696                     | 0.00428         | 8.70E-05        | 6.80E-04       | 0.001995 HC | 0.08707124  |
| 5              | 4.50E-05        | 0.007552      | 0.088655     | 0.00362                      | 0.020465        | 0.002115        | 1.46E-04       | 0.043662 HC | 0.04432133  |
| 6              | 9.20E-05        | 0.011807      | 0.20794      | 0.002956                     | 0.008986        | 1.68E-04        | 2.95E-04       | 0.009683 HC | 0.008287293 |
| 7              | 9.74E-04        | 0.002702      | 0.083906     | 0.004403                     | 0.002727        | 0.001002        | 4.82E-04       | 0.00893 HC  | 0.019073569 |
| 8              | 3.62E-04        | 0.010069      | 0.00109      | 0.001771                     | 0.018782        | 0.00244         | 4.51E-04       | 0.00498 HC  | 0.081578947 |
| 9              | 0.001446        | 0.007138      | 0.007354     | 0.010533                     | 0.025862        | 0.008617        | 0.001015       | 0.018138 HC | 0.049350649 |
| 10             | 6.94E-04        | 0.006118      | 0.03504      | 0.001778                     | 0.001172        | 7.94E-04        | 0.001          | 0.006554 HC | 0.143243243 |
| 11             | 2.50E-05        | 0.023042      | 0.020607     | 0.010465                     | 0.040469        | 0.017551        | 5.17E-04       | 0.02389 HC  | 0.073170732 |
| 12             | 3.00E-04        | 2.02E-04      | 0.161721     | 0.001825                     | 1.34E-04        | 0.002929        | 0.001599       | 0.018259 HC | 0.352941176 |
| 13             | 2.70E-05        | 0.003599      | 0.038398     | 0.001594                     | 0.005341        | 2.26E-04        | 2.73E-04       | 0.001714 HC | 0.053908356 |
| 14             | 1.60E-05        | 0.001111      | 0.006559     | 0.010837                     | 0.005397        | 9.73E-04        | 3.70E-04       | 0.001338 HC | 0.043589744 |
| 15             | 0.005437        | 0.001196      | 0.043777     | 0.001208                     | 0.002716        | 3.61E-04        | 4.16E-04       | 0.008423 HC | 0.16091954  |
| 16             | 0               | 0.012272      | 0.067208     | 0.035626                     | 0.003324        | 3.11E-04        | 4.65E-04       | 0.005672 HC | 0.051204819 |
| 17             | 0.002185        | 0.043448      | 0.051416     | 0.022505                     | 0.012017        | 2.71E-04        | 3.50E-04       | 0.014215 HC | 0.005194805 |
| 18             | 0.003835        | 0.041202      | 0.042228     | 0.019262                     | 0.006603        | 1.61E-04        | 1.62E-04       | 0.014698 HC | 0           |
| 19             | 0.001703        | 0.028731      | 0.056317     | 5.02E-04                     | 0.0068          | 1.86E-04        | 3.06E-04       | 0.003174 HC | 0.140921409 |
| 20             | 1.33E-04        | 0.001328      | 0.009347     | 0.004195                     | 0.004829        | 3.26E-04        | 0              | 0.002295 HC | 0.264623955 |
| 21             | 0.003865        | 0.001712      | 0.005675     | 0.001639                     | 0.002947        | 1.91E-04        | 1.07E-04       | 0.009239 HC | 0.158602151 |
| 22             | 0.005478        | 0.016419      | 0.024883     | 0.012378                     | 0.008773        | 0.001411        | 6.90E-05       | 0.00505 HC  | 0.005633803 |
| 23             | 0               | 0.008594      | 0.018849     | 0.003163                     | 6.27E-04        | 2.80E-05        | 4.84E-04       | 0.00418 HC  | 0.495821727 |
| 24             | 0.003058        | 8.34E-04      | 0.02101      | 0.016846                     | 0.010429        | 0.00179         | 2.80E-04       | 0.004279 HC | 0.005208333 |
| 25             | 0.002133        | 0.003814      | 0.009884     | 0.008993                     | 4.41E-04        | 6.76E-04        | 7.10E-05       | 0.001211 HC | 0.169312169 |
| 26             | 0.002085        | 0.004422      | 0.007873     | 0.018971                     | 0.030589        | 7.43E-04        | 3.10E-05       | 0.008871 HC | 0.008174387 |
| 27             | 0.005375        | 0.00168       | 0.001547     | 0.185245                     | 0.049293        | 5.34E-04        | 0              | 0.00153 HC  | 0.172131148 |
| 28             | 0.001586        | 0.030164      | 0.006284     | 0.030442                     | 0.008338        | 0.00297         | 3.51E-04       | 0.002034 HC | 0.022900763 |
| 29             | 7.72E-04        | 0.025109      | 0.01157      | 0.004135                     | 0.004529        | 0.0012          | 6.63E-04       | 0.004846 HC | 0.013586957 |
| 30             | 0.004935        | 0.009978      | 0.158119     | 0.028076                     | 0.00437         | 0.003785        | 5.70E-05       | 0.006535 HC | 0.020512821 |
| 31             | 0.001184        | 8.33E-04      | 0.018336     | 0.002973                     | 0.003           | 7.44E-04        | 1.14E-04       | 0.002177 HC | 0.065714286 |
| 32             | 1.23E-04        | 3.32E-04      | 0.121193     | 0.034147                     | 0               | 5.72E-04        | 3.45E-04       | 6.72E-04 HC | 0.454545455 |
| 33             | 0.003433        | 0.001248      | 0.117266     | 0.027569                     | 0.001726        | 9.85E-04        | 1.27E-04       | 0.002883 HC | 0.053221289 |
| 34             | 0.001579        | 9.15E-04      | 0.06556      | 0.009792                     | 0.00982         | 0.001628        | 2.40E-04       | 0.002322 HC | 0.012987013 |
| 35             | 3.60E-05        | 0.001877      | 0.006319     | 0.002551                     | 0.017707        | 0.001244        | 1.09E-04       | 0.002516 HC | 0.056022409 |
| 36             | 0               | 7.18E-04      | 0.057988     | 0.023719                     | 8.66E-04        | 0.0013          | 5.34E-04       | 0.009388 HC | 0.359042553 |
| 37             | 0               | 7.89E-04      | 0.030525     | 0.014007                     | 0.004885        | 5.33E-04        | 3.17E-04       | 0.001214 HC | 0.214076246 |
| 38             | 3.00E-05        | 6.80E-04      | 0.15011      | 0.007314                     | 0.003905        | 0.001206        | 4.70E-05       | 0.007333 HC | 0.026737968 |
| 39             | 2.22E-04        | 0.005873      | 0.001631     | 0.009242                     | 0.008653        | 5.79E-04        | 3.99E-04       | 0.009769 HC | 0.01344086  |
| 40             | 1.73E-04        | 0.002412      | 0.194161     | 0.006774                     | 0.002386        | 1.54E-04        | 7.90E-05       | 0.008916 HC | 0.108108108 |
| 41             | 3.50E-05        | 2.55E-04      | 0.005957     | 1.67E-04                     | 0.003917        | 6.43E-04        | 6.94E-04       | 0.003962 HC | 0.514666667 |
| 42             | 1.67E-04        | 6.48E-04      | 0.00129      | 0.001353                     | 0.00324         | 0.001894        | 2.91E-04       | 9.80E-04 HC | 0.269230769 |
| 43             | 0               | 6.82E-04      | 0.025579     | 0.00206                      | 0.004277        | 4.50E-05        | 4.61E-04       | 0.003358 HC | 0.490861619 |
| 44             | 0.003169        | 0.004261      | 0.009908     | 0.001228                     | 0.008477        | 7.10E-05        | 1.66E-04       | 0.001342 HC | 0.108333333 |
| 45             | 0.001592        | 0.002662      | 0.003892     | 3.64E-04                     | 0.002685        | 1.50E-04        | 6.00E-05       | 8.81E-04 HC | 0.402739726 |
| 46             | 0.001821        | 0.001037      | 0.03285      | 0.009401                     | 0.004541        | 3.25E-04        | 2.81E-04       | 0.00194 HC  | 0.005524862 |
| 47             | 1.80E-04        | 0.001078      | 0.017024     | 0.007238                     | 0.004686        | 4.01E-04        | 8.90E-05       | 0.00395 HC  | 0.011428571 |
| 48             | 0.001559        | 0.00418       | 0.012498     | 0.002197                     | 0.001961        | 0.005416        | 9.60E-05       | 0.013229 HC | 0.24137931  |
| 49             | 0.00107         | 0.009777      | 0.013352     | 0.006136                     | 0.008412        | 0.001872        | 3.06E-04       | 0.00622 HC  | 0.011299435 |
| 50             | 0               | 0.004459      | 0.018645     | 0.009192                     | 0.00154         | 4.64E-04        | 4.70E-05       | 0.005264 HC | 0.311827957 |
| 51             | 3.00E-04        | 0.001543      | 0.017269     | 0.016571                     | 0.006922        | 0.001183        | 3.96E-04       | 0.001489 HC | 0           |
| 52             | 8.30E-05        | 0.005425      | 0.012271     | 0.021892                     | 0.008917        | 3.73E-04        | 1.58E-04       | 0.002627 HC | 0.017142857 |
| 53             | 0.001275        | 0.004759      | 0.034926     | 0.012898                     | 0.004987        | 0.003617        | 0.001051       | 0.013638 HC | 0.023684211 |
| 54             | 0.005714        | 0.003338      | 0.140002     | 0.001546                     | 0.004586        | 0               | 3.66E-04       | 0.005969 HC | 0.3         |

|     |          |          |          |          |          |          |          |          |    |             |
|-----|----------|----------|----------|----------|----------|----------|----------|----------|----|-------------|
| 55  | 0        | 0.006931 | 0.020773 | 8.54E-04 | 0.002017 | 1.14E-04 | 5.61E-04 | 0.012217 | HC | 0.549597855 |
| 56  | 3.41E-04 | 0.001599 | 0.033006 | 0.010798 | 0.006015 | 1.24E-04 | 4.60E-04 | 0.014648 | HC | 0.007425743 |
| 57  | 0        | 0.00874  | 0.022517 | 0.014875 | 0.003239 | 1.07E-04 | 2.67E-04 | 0.004121 | HC | 0.114845938 |
| 58  | 2.54E-04 | 0.00104  | 5.60E-04 | 0.019716 | 0.046885 | 2.24E-04 | 1.73E-04 | 0.003165 | HC | 0.219512195 |
| 59  | 0        | 0.027162 | 0.00184  | 0.006103 | 0.049318 | 0.00554  | 1.28E-04 | 0.015448 | HC | 0.414705882 |
| 60  | 7.90E-05 | 0.005188 | 0.101596 | 0.016048 | 0.01006  | 0.001777 | 1.80E-04 | 0.005932 | HC | 0           |
| 61  | 7.60E-05 | 0.001769 | 0.080045 | 0.011729 | 0.00165  | 0.004272 | 7.69E-04 | 0.001114 | HC | 0.147727273 |
| 62  | 1.70E-04 | 0.014259 | 9.11E-04 | 1.63E-04 | 0.005467 | 0.002195 | 3.50E-05 | 0.008366 | HC | 0.366492147 |
| 63  | 7.72E-04 | 0.005034 | 0.033149 | 0.039342 | 0.0082   | 0.001194 | 6.48E-04 | 0.005791 | HC | 0           |
| 64  | 0.00182  | 0.001386 | 0.05881  | 0.008955 | 0.009669 | 0.001573 | 1.35E-04 | 0.010974 | HC | 0           |
| 65  | 6.35E-04 | 0.004734 | 0.030113 | 0.037425 | 0.009681 | 0.001174 | 3.43E-04 | 0.015982 | HC | 0.005420054 |
| 66  | 2.11E-04 | 0.002355 | 0.015578 | 0.018266 | 0.020236 | 0.002217 | 2.70E-05 | 0.014763 | HC | 0.00795756  |
| 67  | 9.70E-05 | 0.004075 | 0.056462 | 0.041608 | 0.00835  | 0.004857 | 9.90E-05 | 0.004002 | HC | 0.01754386  |
| 68  | 0        | 0.058209 | 0.17562  | 0.005616 | 0.005368 | 3.23E-04 | 3.05E-04 | 0.005668 | HC | 0.050632911 |
| 69  | 0.001185 | 0.011378 | 0.023647 | 0.015405 | 0.009213 | 1.25E-04 | 3.19E-04 | 0.005891 | HC | 0           |
| 70  | 1.92E-04 | 0.010121 | 0.023699 | 0.052872 | 0.006294 | 5.13E-04 | 9.15E-04 | 0.001865 | HC | 0.008333333 |
| 71  | 0.001036 | 0.006491 | 0.002815 | 0.007047 | 0.003682 | 2.54E-04 | 1.61E-04 | 0.001826 | HC | 0.077994429 |
| 72  | 1.02E-04 | 0.001713 | 0.041603 | 0.01307  | 0.00308  | 7.98E-04 | 2.94E-04 | 0.002724 | HC | 0.008108108 |
| 73  | 1.35E-04 | 0.002186 | 0.021796 | 0.014842 | 0.01607  | 0.001149 | 2.66E-04 | 0.001128 | HC | 0.010443864 |
| 74  | 4.20E-05 | 0.004165 | 0.002678 | 0.007873 | 0.010171 | 5.91E-04 | 3.50E-05 | 0.002286 | HC | 0.025139665 |
| 75  | 1.04E-04 | 0.014273 | 0.109573 | 0.005746 | 0.006169 | 4.78E-04 | 6.50E-05 | 0.00932  | HC | 0.002881844 |
| 76  | 0        | 0.010185 | 0.036494 | 0.00234  | 0.013251 | 0.001094 | 3.73E-04 | 0.010381 | HC | 0.18079096  |
| 77  | 3.93E-04 | 0.003397 | 0.005227 | 0.001153 | 0.007806 | 7.00E-05 | 5.00E-05 | 0.002874 | HC | 0.262295082 |
| 78  | 2.95E-04 | 0.028856 | 0.006823 | 2.12E-04 | 0.007397 | 0.001399 | 1.13E-04 | 0.003119 | HC | 0.140449438 |
| 79  | 9.45E-04 | 0.003571 | 0.025745 | 0.014854 | 0.017544 | 0.002192 | 1.41E-04 | 0.015802 | HC | 0           |
| 80  | 0.001779 | 0.021319 | 0.009809 | 0.002962 | 0.012602 | 3.73E-04 | 5.79E-04 | 0.003727 | HC | 0.024930748 |
| 81  | 0.028846 | 0.001756 | 0.019646 | 0.012167 | 0.010404 | 4.21E-04 | 3.32E-04 | 0.004758 | HC | 0.13372093  |
| 82  | 6.10E-05 | 0.008239 | 0.02469  | 0.025786 | 0.004756 | 6.95E-04 | 2.40E-05 | 0.005634 | HC | 0.016042781 |
| 83  | 9.47E-04 | 0.007637 | 0.00396  | 0.004075 | 8.10E-04 | 0.001026 | 6.50E-05 | 0.004266 | HC | 0.27520436  |
| 84  | 2.59E-04 | 0.001254 | 0.051172 | 0.006978 | 0.013831 | 0.002821 | 5.92E-04 | 0.007147 | HC | 0.002724796 |
| 85  | 1.21E-04 | 0.006821 | 0.0113   | 0.015458 | 0.003849 | 8.14E-04 | 4.20E-05 | 0.005483 | HC | 0.029325513 |
| 86  | 9.81E-04 | 0.017843 | 0.051971 | 0.004566 | 0.008    | 0.001997 | 3.26E-04 | 0.006514 | HC | 0.002873563 |
| 87  | 0.002532 | 0.002608 | 0.052423 | 0.058608 | 0.00365  | 0.001009 | 7.70E-05 | 0.004752 | HC | 0.022099448 |
| 88  | 0.002035 | 0.002626 | 0.040595 | 0.003178 | 0.00449  | 7.12E-04 | 0.00176  | 0.001857 | HC | 0.028818444 |
| 89  | 7.50E-05 | 0.010824 | 0.017289 | 0.005557 | 0.006881 | 0.001467 | 7.46E-04 | 0.010747 | HC | 0           |
| 90  | 5.58E-04 | 0.002489 | 0.06598  | 0.009293 | 0.025449 | 0.001328 | 2.52E-04 | 0.005552 | HC | 0           |
| 91  | 0.005853 | 0.008294 | 0.009225 | 0.007439 | 0.011712 | 0.002496 | 7.73E-04 | 0.012943 | HC | 0.011594203 |
| 92  | 0.001047 | 0.00699  | 0.014949 | 0.006132 | 0.005432 | 4.36E-04 | 1.00E-04 | 8.57E-04 | HC | 0.04787234  |
| 93  | 0        | 0.022614 | 0.001179 | 0.012228 | 7.50E-05 | 8.28E-04 | 3.30E-05 | 0.003003 | HC | 0.617486339 |
| 94  | 2.60E-05 | 0.002337 | 0.027532 | 0.02159  | 0.001676 | 2.08E-04 | 2.69E-04 | 0.004652 | HC | 0.082191781 |
| 95  | 0.0036   | 2.23E-04 | 0.004282 | 0.075287 | 0.018036 | 9.86E-04 | 6.79E-04 | 0.00264  | HC | 0.148989899 |
| 96  | 0.003407 | 0.004228 | 5.99E-04 | 0.0011   | 0.008119 | 6.36E-04 | 1.95E-04 | 0.006887 | HC | 0.289693593 |
| 97  | 0        | 0.003639 | 0.151973 | 0.00787  | 0.015871 | 0.001957 | 0.002137 | 0.007911 | HC | 0.24        |
| 98  | 8.70E-05 | 0.001089 | 0.014307 | 0.032352 | 0.006687 | 6.96E-04 | 2.12E-04 | 0.004048 | HC | 0.005347594 |
| 99  | 2.60E-05 | 0.010508 | 0.001921 | 3.72E-04 | 5.86E-04 | 9.10E-05 | 6.00E-05 | 8.96E-04 | HC | 0.642458101 |
| 100 | 1.90E-05 | 3.04E-04 | 0.0401   | 0.003355 | 0.006007 | 8.41E-04 | 0.001087 | 0.002123 | HC | 0.160427807 |
| 101 | 0        | 0.021118 | 4.38E-04 | 1.50E-04 | 0.001837 | 0        | 0        | 6.20E-05 | CP | 0.964864865 |
| 102 | 0        | 3.91E-04 | 1.43E-04 | 0.001055 | 0.002426 | 3.95E-04 | 9.37E-04 | 0.005115 | CP | 0.870523416 |
| 103 | 0        | 3.45E-04 | 9.67E-04 | 2.94E-04 | 0.007646 | 2.10E-05 | 4.79E-04 | 0.003965 | CP | 0.773584906 |
| 104 | 0        | 0.001575 | 0.010466 | 0.001151 | 3.57E-04 | 9.80E-05 | 0        | 4.01E-04 | CP | 0.946175637 |
| 105 | 0        | 0.021793 | 3.05E-04 | 0        | 0.001244 | 0        | 0        | 9.17E-04 | CP | 0.910144928 |
| 106 | 0        | 0.007928 | 0.007475 | 6.58E-04 | 0.00407  | 2.80E-05 | 0        | 1.94E-04 | CP | 0.817109145 |
| 107 | 0        | 0.006305 | 3.10E-05 | 0.309004 | 3.40E-05 | 0        | 0        | 0        | CP | 0.911680912 |
| 108 | 0        | 2.22E-04 | 0.048043 | 0.005903 | 0.001675 | 2.70E-04 | 0        | 8.93E-04 | CP | 0.547425474 |
| 109 | 0        | 7.30E-05 | 0.001136 | 3.00E-04 | 0.001171 | 0.003005 | 3.70E-05 | 0.00339  | CP | 0.875690608 |
| 110 | 0        | 1.05E-04 | 0.010684 | 0.002551 | 0.002443 | 0.002361 | 1.59E-04 | 0.003731 | CP | 0.764705882 |
| 111 | 0        | 8.64E-04 | 0.010723 | 0.003848 | 0.002273 | 4.83E-04 | 0.001195 | 0.002174 | CP | 0.549865229 |
| 112 | 0        | 0.006859 | 2.65E-04 | 1.32E-04 | 3.92E-04 | 3.75E-04 | 0        | 0.001596 | CP | 0.861413043 |

|     |          |          |          |          |          |          |          |          |    |             |
|-----|----------|----------|----------|----------|----------|----------|----------|----------|----|-------------|
| 113 | 1.10E-04 | 1.22E-04 | 0.003709 | 4.58E-04 | 7.85E-04 | 1.22E-04 | 1.14E-04 | 0.001133 | CP | 0.643874644 |
| 114 | 0        | 7.73E-04 | 1.78E-04 | 0        | 0.00105  | 6.40E-05 | 0        | 6.20E-05 | CP | 0.994413408 |
| 115 | 3.60E-05 | 5.10E-05 | 0.020096 | 0.001387 | 0.003645 | 0.004198 | 5.51E-04 | 0.017492 | CP | 0.288951841 |
| 116 | 0.012815 | 5.66E-04 | 0.005227 | 0.003377 | 0.002506 | 3.88E-04 | 9.40E-05 | 0.005194 | CP | 0.148148148 |
| 117 | 0        | 2.20E-05 | 0.001701 | 1.97E-04 | 1.77E-04 | 2.10E-05 | 6.80E-05 | 1.22E-04 | CP | 0.943243243 |
| 118 | 0        | 0.00168  | 2.19E-04 | 4.88E-04 | 0.002378 | 3.30E-05 | 0        | 3.70E-05 | CP | 0.997361478 |
| 119 | 0        | 4.10E-05 | 0.01119  | 0.020547 | 6.30E-05 | 4.60E-05 | 0        | 1.90E-05 | CP | 0.897097625 |
| 120 | 0        | 0.005287 | 0.002304 | 7.40E-05 | 1.21E-04 | 7.20E-05 | 0        | 2.30E-05 | CP | 0.974647887 |
| 121 | 0        | 0.0012   | 8.60E-05 | 1.85E-04 | 0.009779 | 0        | 9.10E-05 | 1.75E-04 | CP | 0.888888889 |
| 122 | 0        | 0        | 1.50E-05 | 1.71E-04 | 5.50E-05 | 6.00E-05 | 0        | 1.90E-05 | CP | 0.997183099 |
| 123 | 0        | 0.005422 | 0        | 0.012263 | 0        | 0        | 0        | 0        | CP | 0.941489362 |
| 124 | 0        | 0        | 0.031884 | 0        | 0        | 0        | 0        | 4.10E-05 | CP | 0.966666667 |
| 125 | 8.86E-04 | 1.46E-04 | 0.008138 | 8.92E-04 | 2.96E-04 | 0        | 4.46E-04 | 1.54E-04 | CP | 0.785326087 |
| 126 | 0        | 0.001853 | 2.23E-04 | 2.00E-05 | 1.20E-05 | 3.50E-05 | 0        | 2.20E-05 | CP | 1           |
| 127 | 0        | 0.001752 | 9.93E-04 | 0.001152 | 0.006044 | 0        | 3.90E-05 | 0.00776  | CP | 0.713114754 |
| 128 | 0        | 0.004083 | 3.33E-04 | 0        | 5.70E-05 | 0        | 0        | 0.017009 | CP | 0.896103896 |
| 129 | 0        | 0        | 1.03E-04 | 1.24E-04 | 0        | 0        | 0        | 1.09E-04 | CP | 1           |
| 130 | 0        | 0.00726  | 0.010005 | 0.001468 | 2.67E-04 | 0        | 0        | 0        | CP | 0.925064599 |
| 131 | 0        | 8.07E-04 | 0.089903 | 5.32E-04 | 0.002283 | 7.70E-05 | 1.50E-05 | 0.014542 | CP | 0.563002681 |
| 132 | 0        | 0.009978 | 5.89E-04 | 0        | 0.003223 | 2.95E-04 | 0.012759 | 1.33E-04 | CP | 0.761111111 |
| 133 | 0        | 0.087648 | 0.03572  | 4.20E-05 | 0        | 8.90E-05 | 0        | 1.40E-05 | CP | 0.82234957  |
| 134 | 0        | 5.28E-04 | 0.012633 | 0.00232  | 9.01E-04 | 1.77E-04 | 7.16E-04 | 0.002038 | CP | 0.631428571 |
| 135 | 0        | 0.002268 | 0.005787 | 0.003494 | 0.001211 | 0        | 4.87E-04 | 0.00482  | CP | 0.615384615 |
| 136 | 0        | 0.0012   | 0.001239 | 0.017058 | 0.001069 | 0.005348 | 5.29E-04 | 0.010968 | CP | 0.36827957  |
| 137 | 0        | 0.002711 | 4.48E-04 | 7.48E-04 | 0.002917 | 0.001804 | 7.17E-04 | 0.001505 | CP | 0.827956989 |
| 138 | 6.30E-05 | 0.002501 | 0        | 0        | 0.002763 | 0        | 8.80E-05 | 0.0031   | CP | 0.565683646 |
| 139 | 5.06E-04 | 0        | 8.97E-04 | 8.08E-04 | 0.001302 | 0.003083 | 0        | 0.004612 | CP | 0.660220994 |
| 140 | 1.88E-04 | 3.66E-04 | 0.003222 | 5.25E-04 | 5.42E-04 | 3.03E-04 | 1.72E-04 | 6.38E-04 | CP | 0.505649718 |
| 141 | 0        | 0.006828 | 0.008445 | 0.001914 | 0.003813 | 0.001305 | 0.002512 | 0.008352 | CP | 0.400544959 |
| 142 | 0        | 0.005456 | 0.012098 | 0.001997 | 9.57E-04 | 0.001072 | 1.38E-04 | 0.003283 | CP | 0.480362538 |
| 143 | 0        | 4.48E-04 | 0.002209 | 0.004481 | 0.005665 | 2.47E-04 | 0        | 0.014333 | CP | 0.494923858 |
| 144 | 0        | 0        | 0.00195  | 0.006577 | 0        | 0        | 0        | 0        | CP | 0.965517241 |
| 145 | 0        | 2.28E-04 | 5.21E-04 | 5.13E-04 | 0.002051 | 7.00E-05 | 0        | 0.001281 | CP | 0.983050847 |
| 146 | 0        | 4.56E-04 | 7.61E-04 | 0        | 0.002028 | 0        | 0        | 0.001586 | CP | 0.975274725 |
| 147 | 0        | 0.003222 | 4.90E-05 | 1.65E-04 | 0.001446 | 0        | 0        | 0        | CP | 0.997389034 |
| 148 | 0        | 0.002663 | 0.00573  | 7.09E-04 | 0.006277 | 0.001678 | 3.43E-04 | 0.003232 | CP | 0.552845528 |

Table S8. the corresponding  
output value and POD value of each optimal microbial marker in validation cohort

| SampleID | OTU1721<br>(Candidate_divisi<br>on_TM7_norank) | OTU1277<br>(Actinomyces) | OTU1642<br>(Haemophilus) | OTU1868<br>(Prevotella) | OTU1086<br>(Family_XIII_Inc<br>ertae_Sedis) | OTU1454<br>(Fusobacterium) | OTU2268<br>(ASCC02_noran<br>k) | OTU648<br>(Oribacterium) | POD value |
|----------|------------------------------------------------|--------------------------|--------------------------|-------------------------|---------------------------------------------|----------------------------|--------------------------------|--------------------------|-----------|
| HC003    | 0.001392                                       | 0.033016                 | 0.005239                 | 0.039281                | 0.0061                                      | 6.18E-04                   | 3.51E-04                       | 0.002206                 | 0.021     |
| HC007    | 3.21E-04                                       | 0.007711                 | 0.017337                 | 0.01228                 | 0.011201                                    | 0.001017                   | 8.70E-05                       | 0.002162                 | 0.002     |
| HC013    | 2.30E-05                                       | 0.007975                 | 0.010962                 | 0.003057                | 0.00631                                     | 0.001286                   | 2.60E-05                       | 0.004028                 | 0.046     |
| HC015    | 0                                              | 0.005874                 | 0.01355                  | 0.008164                | 0.010729                                    | 0.002181                   | 5.29E-04                       | 0.005525                 | 0.272     |
| HC017    | 5.91E-04                                       | 0.002701                 | 0.007792                 | 0.004341                | 0.009247                                    | 0.002196                   | 5.98E-04                       | 0.005403                 | 0.007     |
| HC021    | 0.009304                                       | 0.002415                 | 0.040798                 | 0.003039                | 0.012408                                    | 0.002754                   | 0.001852                       | 0.00386                  | 0.043     |
| HC024    | 3.45E-04                                       | 0.015238                 | 0.07718                  | 0.011506                | 0.001002                                    | 7.81E-04                   | 2.62E-04                       | 8.56E-04                 | 0.063     |
| HC026    | 5.90E-05                                       | 1.65E-04                 | 0.044634                 | 0.001755                | 0.0047                                      | 4.00E-04                   | 4.07E-04                       | 0.002193                 | 0.252     |
| HC028    | 0                                              | 0.008943                 | 0.523911                 | 0.007459                | 0.003567                                    | 2.94E-04                   | 4.04E-04                       | 0.00797                  | 0.041     |
| HC032    | 4.90E-04                                       | 0.008464                 | 0.043357                 | 0.00457                 | 0.008098                                    | 0.001809                   | 2.00E-04                       | 0.01271                  | 0.002     |
| HC036    | 0.008628                                       | 0.028764                 | 0.001005                 | 6.50E-05                | 0.004997                                    | 1.01E-04                   | 0                              | 0.003207                 | 0.344     |
| HC046    | 0.001509                                       | 0.009412                 | 0.002862                 | 0.002121                | 0.006389                                    | 3.69E-04                   | 2.46E-04                       | 0.001473                 | 0.032     |
| HC050    | 0                                              | 0.006371                 | 0.024975                 | 0.006442                | 0.01492                                     | 6.09E-04                   | 7.50E-05                       | 0.012368                 | 0.095     |
| HC051    | 5.40E-05                                       | 0.003883                 | 0.042304                 | 0.03895                 | 0.008078                                    | 6.45E-04                   | 3.56E-04                       | 0.002277                 | 0.002     |
| HC054    | 0.005805                                       | 4.98E-04                 | 0.021322                 | 0.019291                | 0.001106                                    | 0.025092                   | 3.43E-04                       | 0.005211                 | 0.2       |
| HC056    | 9.45E-04                                       | 0.002091                 | 0.004402                 | 0.021666                | 0.021588                                    | 0.002668                   | 1.85E-04                       | 0.005295                 | 0.01      |
| HC057    | 0.001928                                       | 5.16E-04                 | 0.012507                 | 0.011071                | 0.005647                                    | 0.002557                   | 4.67E-04                       | 0.003767                 | 0.096     |
| HC061    | 2.95E-04                                       | 0.013381                 | 0.005205                 | 0.003974                | 0.006073                                    | 7.00E-05                   | 6.60E-05                       | 0.002652                 | 0.067     |
| HC062    | 2.56E-04                                       | 0.009739                 | 0.236022                 | 0.005733                | 7.90E-04                                    | 6.27E-04                   | 3.34E-04                       | 0.00361                  | 0.038     |
| HC064    | 0.001204                                       | 0.06156                  | 0.00543                  | 0.012825                | 3.27E-04                                    | 2.32E-04                   | 0                              | 2.54E-04                 | 0.544     |
| HC065    | 0.00103                                        | 0.01538                  | 0.042103                 | 0.015136                | 0.011374                                    | 0.002178                   | 1.02E-04                       | 0.003683                 | 0         |
| HC068    | 0                                              | 1.54E-04                 | 0.042037                 | 0.002377                | 0.003764                                    | 5.18E-04                   | 2.18E-04                       | 0.003055                 | 0.411     |
| HC070    | 2.30E-05                                       | 0.008208                 | 0.184266                 | 0.041734                | 0.004483                                    | 6.56E-04                   | 1.29E-04                       | 0.006763                 | 0         |
| HC072    | 9.21E-04                                       | 0.002695                 | 0.03087                  | 0.022477                | 0.020812                                    | 0.004073                   | 4.20E-05                       | 0.02308                  | 0.023     |
| HC073    | 9.10E-05                                       | 0.011472                 | 0.019183                 | 0.005525                | 0.008682                                    | 0.001816                   | 4.28E-04                       | 0.007371                 | 0         |
| HC076    | 4.16E-04                                       | 1.06E-04                 | 0.007305                 | 0.005114                | 0.004255                                    | 4.05E-04                   | 1.92E-04                       | 0.001702                 | 0.38      |
| HC077    | 0.001109                                       | 8.50E-05                 | 0.002703                 | 0.007495                | 0.001518                                    | 1.18E-04                   | 1.53E-04                       | 7.34E-04                 | 0.633     |
| HC078    | 5.70E-05                                       | 0.017988                 | 0.005444                 | 0.001011                | 0.002139                                    | 0.002137                   | 1.42E-04                       | 0.00688                  | 0.263     |
| HC079    | 3.03E-04                                       | 6.58E-04                 | 0.202061                 | 0.016075                | 0.003934                                    | 0.001372                   | 0.002247                       | 0.004313                 | 0.045     |
| HC088    | 0.002889                                       | 9.89E-04                 | 0.097861                 | 0.003991                | 0.004689                                    | 0.003454                   | 1.26E-04                       | 0.011548                 | 0.015     |
| HC094    | 0.003642                                       | 0.08135                  | 0.005664                 | 0.002106                | 0.002843                                    | 0.002797                   | 1.01E-04                       | 0.00387                  | 0.102     |
| HC096    | 2.50E-04                                       | 2.64E-04                 | 0.15876                  | 0.016706                | 0.004009                                    | 0.001097                   | 3.61E-04                       | 0.002261                 | 0.063     |
| HC100    | 1.92E-04                                       | 0.002858                 | 0.076186                 | 0.008211                | 0.003694                                    | 9.55E-04                   | 3.95E-04                       | 0.004999                 | 0.004     |
| HC102    | 0.003316                                       | 0.0022                   | 0.082429                 | 0.009922                | 0.007368                                    | 3.40E-04                   | 4.96E-04                       | 0.006499                 | 0.004     |
| HC103    | 0                                              | 0.003812                 | 0.291768                 | 0                       | 1.66E-04                                    | 0                          | 0                              | 1.99E-04                 | 0.952     |
| HC105    | 0                                              | 0.009058                 | 0.043386                 | 0.008097                | 0.007811                                    | 2.70E-04                   | 9.21E-04                       | 0.009157                 | 0.068     |
| HC111    | 0.001676                                       | 0.002867                 | 0.040191                 | 0.021625                | 0.008348                                    | 0.001859                   | 7.35E-04                       | 0.007104                 | 0.001     |
| HC113    | 1.22E-04                                       | 0.015154                 | 0.161096                 | 0.020467                | 0.004194                                    | 4.27E-04                   | 4.15E-04                       | 0.015945                 | 0.001     |
| HC114    | 0.00119                                        | 0                        | 0.022863                 | 0.004165                | 0.004904                                    | 0.003466                   | 3.90E-05                       | 0.003102                 | 0.369     |
| HC117    | 2.42E-04                                       | 2.04E-04                 | 0.004525                 | 0.004563                | 0.009186                                    | 0.001666                   | 9.90E-05                       | 0.009571                 | 0.165     |
| HC120    | 2.36E-04                                       | 5.20E-05                 | 0.072416                 | 0.002044                | 0.01693                                     | 0.001657                   | 3.10E-04                       | 0.001426                 | 0.339     |
| HC122    | 4.61E-04                                       | 0.014552                 | 0.001298                 | 0.001287                | 0.016651                                    | 0.001308                   | 4.24E-04                       | 0.003701                 | 0.035     |
| HC124    | 5.80E-05                                       | 0.005395                 | 5.41E-04                 | 0.002558                | 0.005219                                    | 2.05E-04                   | 3.00E-05                       | 0.002404                 | 0.172     |
| HC127    | 8.30E-04                                       | 0.022387                 | 0.13252                  | 0.002544                | 0.002606                                    | 3.23E-04                   | 1.79E-04                       | 0.002492                 | 0.051     |
| HC128    | 2.64E-04                                       | 2.60E-04                 | 0.053416                 | 0.005713                | 0.009363                                    | 1.89E-04                   | 0                              | 0.003385                 | 0.284     |
| HC129    | 0.005358                                       | 0.007182                 | 0.008361                 | 0.004451                | 0.004326                                    | 2.85E-04                   | 2.31E-04                       | 0.002049                 | 0.011     |
| HC132    | 1.18E-04                                       | 0.020047                 | 0.002622                 | 3.73E-04                | 0.002573                                    | 2.59E-04                   | 0                              | 0.001299                 | 0.399     |
| HC134    | 1.15E-04                                       | 6.42E-04                 | 0.103805                 | 0.01652                 | 0.002879                                    | 0.006452                   | 1.02E-04                       | 0.002825                 | 0.083     |
| HC140    | 8.44E-04                                       | 0.024175                 | 0.031053                 | 0.024307                | 0.002303                                    | 0.011261                   | 2.90E-04                       | 0.003429                 | 0.05      |
| HC149    | 0                                              | 5.64E-04                 | 0.004819                 | 0.001732                | 0.002475                                    | 3.02E-04                   | 5.04E-04                       | 4.98E-04                 | 0.887     |
| CP09     | 4.10E-05                                       | 0.00149                  | 0.004183                 | 6.36E-04                | 3.14E-04                                    | 7.20E-05                   | 0                              | 0.002447                 | 0.654     |
| CP12     | 0                                              | 3.16E-04                 | 8.15E-04                 | 5.97E-04                | 0.002118                                    | 7.18E-04                   | 4.21E-04                       | 6.46E-04                 | 0.907     |
| CP13     | 0                                              | 7.82E-04                 | 0.001279                 | 0.001127                | 5.70E-05                                    | 1.27E-04                   | 0.001095                       | 0.002082                 | 0.827     |
| CP15     | 0                                              | 2.84E-04                 | 0.001099                 | 9.54E-04                | 0.004554                                    | 0                          | 2.89E-04                       | 0.003675                 | 0.851     |

|      |          |          |          |          |          |          |          |          |       |
|------|----------|----------|----------|----------|----------|----------|----------|----------|-------|
| CP17 | 3.70E-04 | 6.60E-05 | 3.62E-04 | 4.28E-04 | 0.003742 | 0.005941 | 6.90E-04 | 0.002825 | 0.64  |
| CP19 | 0        | 0        | 0.001578 | 9.30E-05 | 1.69E-04 | 1.82E-04 | 8.29E-04 | 0.001389 | 0.878 |
| CP23 | 0        | 0        | 9.50E-05 | 2.90E-05 | 0        | 1.35E-04 | 2.30E-05 | 0        | 0.951 |
| CP25 | 0        | 3.41E-04 | 4.68E-04 | 6.76E-04 | 0.003419 | 0        | 1.56E-04 | 0.003463 | 0.944 |
| CP27 | 0        | 4.35E-04 | 0.008351 | 0.001661 | 0.003549 | 3.83E-04 | 4.18E-04 | 0.001197 | 0.7   |
| CP28 | 0        | 2.43E-04 | 3.31E-04 | 0        | 0.001855 | 9.00E-04 | 0        | 2.56E-04 | 0.947 |
| CP30 | 0        | 0.00418  | 3.50E-05 | 0.01867  | 0.007312 | 0.005245 | 0        | 0.012307 | 0.586 |
| CP33 | 0        | 0.01882  | 0.002511 | 0.007007 | 4.12E-04 | 0        | 0        | 2.29E-04 | 0.891 |
| CP39 | 0        | 8.15E-04 | 0.001166 | 8.70E-05 | 0.001327 | 0        | 2.35E-04 | 0.009455 | 0.892 |
| CP40 | 0        | 0.006153 | 1.26E-04 | 6.20E-05 | 0.001445 | 0        | 0        | 0.007263 | 0.957 |
| CP41 | 0        | 0        | 0        | 0        | 5.12E-04 | 0        | 0        | 0        | 1     |
| CP42 | 0        | 0.005071 | 0.007149 | 1.25E-04 | 0.003093 | 3.96E-04 | 0.002324 | 0.003368 | 0.764 |
| CP43 | 0        | 0.008069 | 1.43E-04 | 0        | 4.04E-04 | 0        | 0        | 2.60E-04 | 0.991 |
| CP47 | 0        | 0        | 0.002999 | 5.00E-05 | 0.002223 | 5.76E-04 | 9.80E-05 | 0.001196 | 0.895 |
| CP56 | 1.37E-04 | 0        | 0.001741 | 1.28E-04 | 9.01E-04 | 0        | 2.56E-04 | 5.03E-04 | 0.916 |
| CP59 | 0        | 0.002041 | 0.00336  | 5.97E-04 | 0.001717 | 6.01E-04 | 2.70E-05 | 0.002574 | 0.815 |
| CP63 | 0        | 1.63E-04 | 0.022234 | 7.60E-05 | 0.001348 | 2.22E-04 | 6.72E-04 | 0.001683 | 0.69  |
| CP64 | 0.010706 | 0.001898 | 0.005933 | 0.023509 | 0.004598 | 0.004268 | 4.02E-04 | 0.009955 | 0.112 |
| CP71 | 0        | 0.01912  | 1.99E-04 | 0.011099 | 0.003274 | 0.001126 | 0        | 8.37E-04 | 0.619 |
| CP72 | 0        | 0.002644 | 0.00282  | 2.40E-05 | 0.006932 | 0.006391 | 4.16E-04 | 0.013696 | 0.674 |

| Table S9. the corresponding<br>output value and POD value of each optimal microbial marker in the independent diagnosis cohort |                          |                                             |                          |                            |                          |                                                |                         |                                |              |
|--------------------------------------------------------------------------------------------------------------------------------|--------------------------|---------------------------------------------|--------------------------|----------------------------|--------------------------|------------------------------------------------|-------------------------|--------------------------------|--------------|
| SampleID                                                                                                                       | OTU648<br>(Oribacterium) | OTU1086<br>(Family_XIII_Inc<br>ertae_Sedis) | OTU1277<br>(Actinomyces) | OTU1454<br>(Fusobacterium) | OTU1642<br>(Haemophilus) | OTU1721<br>(Candidate_divisi<br>on_TM7_norank) | OTU1868<br>(Prevotella) | OTU2268<br>(ASCC02_no<br>rank) | POD<br>value |
| HC003                                                                                                                          | 0.00227                  | 0.006139                                    | 0.032886                 | 5.80E-04                   | 0.005201                 | 0.001278                                       | 0.039434                | 3.60E-04                       | 0.018        |
| HC007                                                                                                                          | 0.002137                 | 0.01109                                     | 0.007627                 | 0.001069                   | 0.017292                 | 3.15E-04                                       | 0.012304                | 8.20E-05                       | 0.002        |
| HC013                                                                                                                          | 0.004122                 | 0.006451                                    | 0.007911                 | 0.001231                   | 0.010884                 | 3.00E-05                                       | 0.003063                | 2.90E-05                       | 0.043        |
| HC015                                                                                                                          | 0.005752                 | 0.01069                                     | 0.0059                   | 0.002131                   | 0.013756                 | 0                                              | 0.008482                | 5.36E-04                       | 0.263        |
| HC017                                                                                                                          | 0.005473                 | 0.009206                                    | 0.002671                 | 0.0023                     | 0.007817                 | 6.06E-04                                       | 0.004187                | 5.85E-04                       | 0.008        |
| HC021                                                                                                                          | 0.003761                 | 0.012454                                    | 0.002357                 | 0.002773                   | 0.040829                 | 0.00937                                        | 0.003027                | 0.001913                       | 0.076        |
| HC024                                                                                                                          | 8.50E-04                 | 0.001025                                    | 0.015268                 | 8.07E-04                   | 0.078231                 | 3.37E-04                                       | 0.011198                | 2.57E-04                       | 0.063        |
| HC026                                                                                                                          | 0.002288                 | 0.004751                                    | 1.74E-04                 | 3.84E-04                   | 0.04484                  | 5.70E-05                                       | 0.001804                | 3.61E-04                       | 0.25         |
| HC028                                                                                                                          | 0.007944                 | 0.003581                                    | 0.008892                 | 2.82E-04                   | 0.52284                  | 0                                              | 0.007389                | 4.02E-04                       | 0.05         |
| HC032                                                                                                                          | 0.012736                 | 0.007976                                    | 0.008352                 | 0.001758                   | 0.043058                 | 4.95E-04                                       | 0.004493                | 2.04E-04                       | 0.003        |
| HC036                                                                                                                          | 0.00313                  | 0.004802                                    | 0.028874                 | 1.31E-04                   | 9.19E-04                 | 0.008877                                       | 6.60E-05                | 0                              | 0.316        |
| HC046                                                                                                                          | 0.00143                  | 0.006545                                    | 0.009615                 | 4.11E-04                   | 0.002914                 | 0.001524                                       | 0.002004                | 2.50E-04                       | 0.034        |
| HC050                                                                                                                          | 0.01248                  | 0.014754                                    | 0.006219                 | 6.67E-04                   | 0.024939                 | 0                                              | 0.006328                | 7.30E-05                       | 0.095        |
| HC051                                                                                                                          | 0.002284                 | 0.008229                                    | 0.003929                 | 6.56E-04                   | 0.04271                  | 5.00E-05                                       | 0.03851                 | 4.00E-04                       | 0            |
| HC054                                                                                                                          | 0.005188                 | 0.001071                                    | 5.21E-04                 | 0.025132                   | 0.021186                 | 0.006037                                       | 0.019307                | 3.27E-04                       | 0.193        |
| HC056                                                                                                                          | 0.005298                 | 0.02162                                     | 0.002141                 | 0.00266                    | 0.004404                 | 8.99E-04                                       | 0.021774                | 1.89E-04                       | 0.01         |
| HC057                                                                                                                          | 0.00382                  | 0.005934                                    | 5.21E-04                 | 0.002561                   | 0.012633                 | 0.00196                                        | 0.011256                | 5.17E-04                       | 0.094        |
| HC061                                                                                                                          | 0.002649                 | 0.0061                                      | 0.013317                 | 7.20E-05                   | 0.005044                 | 3.34E-04                                       | 0.004034                | 6.40E-05                       | 0.059        |
| HC062                                                                                                                          | 0.003779                 | 7.76E-04                                    | 0.009651                 | 6.16E-04                   | 0.236272                 | 2.41E-04                                       | 0.005853                | 3.44E-04                       | 0.037        |
| HC064                                                                                                                          | 2.49E-04                 | 3.49E-04                                    | 0.061936                 | 2.69E-04                   | 0.005472                 | 0.001277                                       | 0.012879                | 0                              | 0.536        |
| HC065                                                                                                                          | 0.003652                 | 0.011365                                    | 0.015217                 | 0.002132                   | 0.042055                 | 9.70E-04                                       | 0.015046                | 9.40E-05                       | 0.003        |
| HC068                                                                                                                          | 0.002985                 | 0.003622                                    | 1.45E-04                 | 4.89E-04                   | 0.041944                 | 0                                              | 0.002394                | 2.07E-04                       | 0.465        |
| HC070                                                                                                                          | 0.006707                 | 0.004288                                    | 0.008269                 | 0.000649                   | 0.183461                 | 2.30E-05                                       | 0.0415                  | 1.60E-04                       | 0            |
| HC072                                                                                                                          | 0.023248                 | 0.0207                                      | 0.002654                 | 0.004043                   | 0.030849                 | 9.70E-04                                       | 0.022553                | 5.00E-05                       | 0.021        |
| HC073                                                                                                                          | 0.007465                 | 0.008823                                    | 0.011465                 | 0.001851                   | 0.019196                 | 9.80E-05                                       | 0.005537                | 4.62E-04                       | 0            |
| HC076                                                                                                                          | 0.001578                 | 0.004308                                    | 6.90E-05                 | 4.17E-04                   | 0.007336                 | 4.42E-04                                       | 0.005213                | 1.81E-04                       | 0.382        |
| HC077                                                                                                                          | 7.23E-04                 | 0.001448                                    | 9.60E-05                 | 1.25E-04                   | 0.002656                 | 0.00114                                        | 0.007468                | 1.59E-04                       | 0.626        |
| HC078                                                                                                                          | 0.006784                 | 0.002139                                    | 0.018103                 | 0.002193                   | 0.005491                 | 4.70E-05                                       | 0.001009                | 1.65E-04                       | 0.262        |
| HC079                                                                                                                          | 0.004428                 | 0.003928                                    | 7.16E-04                 | 0.001358                   | 0.201748                 | 3.06E-04                                       | 0.016008                | 0.002133                       | 0.025        |
| HC088                                                                                                                          | 0.011457                 | 0.004604                                    | 9.40E-04                 | 0.003444                   | 0.098026                 | 0.002953                                       | 0.004057                | 1.32E-04                       | 0.014        |
| HC094                                                                                                                          | 0.003873                 | 0.002817                                    | 0.081216                 | 0.002805                   | 0.005664                 | 0.003627                                       | 0.00216                 | 8.50E-05                       | 0.116        |
| HC096                                                                                                                          | 0.002356                 | 0.003956                                    | 2.57E-04                 | 0.001117                   | 0.158268                 | 2.60E-04                                       | 0.016904                | 3.32E-04                       | 0.067        |
| HC100                                                                                                                          | 0.00495                  | 0.003747                                    | 0.002831                 | 9.46E-04                   | 0.075993                 | 2.32E-04                                       | 0.008219                | 3.42E-04                       | 0.008        |
| HC102                                                                                                                          | 0.00658                  | 0.007471                                    | 0.002207                 | 3.60E-04                   | 0.082703                 | 0.003233                                       | 0.009789                | 4.87E-04                       | 0.004        |
| HC103                                                                                                                          | 1.80E-04                 | 1.48E-04                                    | 0.003761                 | 0                          | 0.29183                  | 0                                              | 0                       | 0                              | 0.952        |
| HC105                                                                                                                          | 0.009152                 | 0.007861                                    | 0.009161                 | 2.97E-04                   | 0.043863                 | 0                                              | 0.008195                | 8.90E-04                       | 0.057        |
| HC111                                                                                                                          | 0.006959                 | 0.008328                                    | 0.002774                 | 0.001912                   | 0.039855                 | 0.001788                                       | 0.021728                | 7.29E-04                       | 0.001        |
| HC113                                                                                                                          | 0.015911                 | 0.004339                                    | 0.015192                 | 4.23E-04                   | 0.160676                 | 1.19E-04                                       | 0.020377                | 4.05E-04                       | 0.001        |
| HC114                                                                                                                          | 0.003037                 | 0.004829                                    | 0                        | 0.003417                   | 0.023053                 | 0.001189                                       | 0.004161                | 3.20E-05                       | 0.367        |
| HC117                                                                                                                          | 0.009644                 | 0.0091                                      | 2.04E-04                 | 0.001631                   | 0.004517                 | 2.23E-04                                       | 0.004374                | 1.01E-04                       | 0.166        |
| HC120                                                                                                                          | 0.001485                 | 0.016926                                    | 4.50E-05                 | 0.001654                   | 0.072345                 | 2.25E-04                                       | 0.002028                | 2.62E-04                       | 0.341        |
| HC122                                                                                                                          | 0.00359                  | 0.016535                                    | 0.014691                 | 0.00136                    | 0.001367                 | 4.29E-04                                       | 0.001245                | 3.77E-04                       | 0.035        |
| HC124                                                                                                                          | 0.002449                 | 0.005096                                    | 0.005361                 | 2.22E-04                   | 5.16E-04                 | 5.90E-05                                       | 0.002597                | 3.20E-05                       | 0.185        |
| HC127                                                                                                                          | 0.00255                  | 0.002645                                    | 0.022038                 | 3.34E-04                   | 0.133532                 | 9.04E-04                                       | 0.002562                | 2.12E-04                       | 0.034        |
| HC128                                                                                                                          | 0.003405                 | 0.009387                                    | 2.41E-04                 | 1.89E-04                   | 0.052846                 | 2.40E-04                                       | 0.005717                | 0                              | 0.284        |
| HC129                                                                                                                          | 0.002053                 | 0.004351                                    | 0.007209                 | 2.79E-04                   | 0.008287                 | 0.005414                                       | 0.004402                | 2.70E-04                       | 0.011        |
| HC132                                                                                                                          | 0.001253                 | 0.002524                                    | 0.019839                 | 2.77E-04                   | 0.002653                 | 1.32E-04                                       | 3.68E-04                | 0                              | 0.415        |
| HC134                                                                                                                          | 0.00281                  | 0.002761                                    | 6.30E-04                 | 0.006687                   | 0.103914                 | 1.28E-04                                       | 0.016848                | 1.21E-04                       | 0.083        |
| HC140                                                                                                                          | 0.003415                 | 0.002201                                    | 0.024021                 | 0.011106                   | 0.031259                 | 8.62E-04                                       | 0.02455                 | 2.91E-04                       | 0.047        |
| HC149                                                                                                                          | 4.92E-04                 | 0.002558                                    | 5.55E-04                 | 3.09E-04                   | 0.004707                 | 0                                              | 0.001703                | 4.73E-04                       | 0.877        |
| HZCP001                                                                                                                        | 0.002167                 | 1.51E-04                                    | 0.003217                 | 0.002529                   | 2.02E-04                 | 0                                              | 0.013122                | 1.91E-04                       | 0.603        |
| HZCP002                                                                                                                        | 0.008125                 | 0.004363                                    | 6.98E-04                 | 0.002273                   | 0.080345                 | 0.002376                                       | 0.009976                | 5.80E-05                       | 0.01         |
| HZCP003                                                                                                                        | 0.010953                 | 0.004728                                    | 0.00267                  | 0.022661                   | 0.03158                  | 0.002638                                       | 0.014389                | 1.80E-05                       | 0.074        |
| HZCP004                                                                                                                        | 0.002984                 | 0.001523                                    | 0.002541                 | 0.006965                   | 0.004644                 | 0                                              | 0.010327                | 0                              | 0.593        |

|         |          |          |          |          |          |          |          |          |       |
|---------|----------|----------|----------|----------|----------|----------|----------|----------|-------|
| HZCP005 | 0.008359 | 0.006402 | 0.002019 | 0.018748 | 0.002423 | 0.001379 | 0.00412  | 3.70E-05 | 0.059 |
| HZCP006 | 0.006112 | 0.002056 | 5.35E-04 | 0.00234  | 0.144993 | 0.002243 | 0.019738 | 0        | 0.294 |
| HZCP007 | 0.004604 | 8.67E-04 | 1.52E-04 | 4.66E-04 | 0.004955 | 0.002284 | 0.007257 | 0        | 0.569 |
| HZCP008 | 0.007044 | 0.006641 | 0.00334  | 0.005279 | 0.017535 | 3.95E-04 | 3.01E-04 | 0        | 0.263 |
| HZCP009 | 0.010651 | 2.03E-04 | 0.002606 | 0.003061 | 0.011563 | 0        | 9.79E-04 | 0        | 0.792 |
| HZCP010 | 0.00778  | 0.002717 | 1.56E-04 | 0.023411 | 0.062526 | 2.02E-04 | 0.017699 | 0        | 0.443 |
| HZCP011 | 0.007067 | 0.005661 | 9.80E-05 | 0.004023 | 0.107448 | 0        | 0.049643 | 0        | 0.49  |
| HZCP012 | 0.005102 | 0.007503 | 0.011236 | 0.004033 | 0.038932 | 0.003657 | 0.002078 | 3.70E-05 | 0.05  |
| HZCP013 | 0.001306 | 9.70E-05 | 0.003786 | 0.002557 | 9.30E-05 | 1.39E-04 | 3.62E-04 | 5.90E-05 | 0.54  |
| HZCP014 | 0.016934 | 0.002328 | 2.42E-04 | 0.001297 | 0.00638  | 0        | 0.001322 | 2.30E-05 | 0.807 |
| HZCP018 | 0.002444 | 3.87E-04 | 9.73E-04 | 0.012431 | 0.001617 | 0        | 0        | 0        | 0.849 |
| HZCP019 | 0.008263 | 0.001977 | 0.00725  | 0.003872 | 0.010562 | 0        | 0.001009 | 0        | 0.731 |
| HZCP022 | 1.20E-04 | 0        | 0        | 2.50E-05 | 9.38E-04 | 0        | 4.10E-05 | 0        | 0.996 |
| HZCP024 | 0.001806 | 0.002462 | 6.90E-04 | 0.001615 | 0.027653 | 5.11E-04 | 5.14E-04 | 0        | 0.449 |
| HZCP025 | 0.005714 | 0.00176  | 3.10E-05 | 8.19E-04 | 0.051101 | 3.41E-04 | 0.008244 | 5.50E-05 | 0.401 |
| HZCP026 | 0.004009 | 0.0024   | 5.40E-05 | 0.005993 | 0.005478 | 0        | 3.26E-04 | 2.90E-05 | 0.887 |
| HZCP028 | 0.00574  | 8.55E-04 | 0.020299 | 1.10E-05 | 5.20E-05 | 0        | 0.003369 | 0        | 0.79  |
| HZCP029 | 1.99E-04 | 0        | 7.41E-04 | 0        | 1.75E-04 | 0        | 0        | 0        | 0.998 |
| HZCP033 | 0.002805 | 0.003919 | 0.002856 | 0.002179 | 0.001139 | 0.010176 | 0.003121 | 0        | 0.24  |
| HZCP034 | 0.003877 | 4.59E-04 | 0.002053 | 6.56E-04 | 0.005827 | 0        | 7.17E-04 | 0        | 0.855 |
| HZCP037 | 0.003682 | 5.18E-04 | 2.16E-04 | 0.001695 | 0.005086 | 0.004559 | 0.000649 | 4.90E-05 | 0.504 |
| HZCP038 | 0.01428  | 0.007663 | 7.40E-05 | 6.11E-04 | 0.006217 | 5.00E-04 | 3.14E-04 | 5.00E-05 | 0.439 |
| HZCP039 | 0.002583 | 4.27E-04 | 1.45E-04 | 2.66E-04 | 0.005439 | 0        | 3.56E-04 | 0        | 0.935 |
| HZCP040 | 0.005184 | 9.60E-05 | 0.001556 | 0        | 0.001666 | 0        | 1.23E-04 | 0        | 0.929 |
| HZCP043 | 0.048937 | 0.008437 | 2.10E-05 | 7.40E-04 | 0.040955 | 0.013014 | 0.001498 | 0        | 0.484 |
| HZCP044 | 0.012285 | 8.00E-05 | 0.002896 | 2.22E-04 | 0.03001  | 0        | 0.004391 | 0        | 0.553 |
| HZCP045 | 0.008327 | 0        | 0.005973 | 8.50E-05 | 0.003562 | 0        | 0.291327 | 0        | 0.681 |
| HZCP046 | 0.002602 | 0.0052   | 5.29E-04 | 0.008298 | 0.027392 | 0        | 0.030459 | 0        | 0.404 |
| HZCP048 | 0.001681 | 0.00361  | 6.43E-04 | 0.001347 | 0.048089 | 0        | 0.016923 | 7.60E-05 | 0.169 |
| HZCP053 | 0.003728 | 0.003795 | 2.12E-04 | 0.003621 | 0.069881 | 3.90E-05 | 0.022873 | 0        | 0.325 |
| HZCP058 | 2.50E-05 | 0        | 0.00499  | 0        | 2.00E-05 | 0        | 6.00E-05 | 0        | 1     |
| HZCP079 | 0.006965 | 0        | 0.00143  | 0.00515  | 0        | 0        | 0.018288 | 0        | 0.74  |
| HZCP080 | 0.002944 | 0.001048 | 1.00E-04 | 3.84E-04 | 0.030036 | 0        | 0.006488 | 2.12E-04 | 0.544 |
| HZCP081 | 0.002068 | 0.004079 | 7.10E-05 | 0.003824 | 0.020258 | 0.001219 | 0.007524 | 5.70E-05 | 0.37  |
| HZCP082 | 0.002892 | 0.002095 | 0.001231 | 0.012853 | 0.055955 | 2.30E-05 | 8.77E-04 | 0        | 0.478 |
| HZCP083 | 0.00314  | 3.56E-04 | 0        | 0.041149 | 0.024629 | 0.027118 | 0.009139 | 8.80E-05 | 0.47  |
| HZCP085 | 0.005933 | 0.002659 | 6.80E-05 | 6.41E-04 | 0.067951 | 0        | 0.022221 | 0        | 0.565 |
| HZCP086 | 5.89E-04 | 4.50E-04 | 1.30E-04 | 0.015785 | 0.090363 | 0        | 0        | 0        | 0.858 |
| HZCP087 | 0.009368 | 0.001371 | 1.71E-04 | 0.012248 | 0.014355 | 3.41E-04 | 0.022636 | 6.00E-05 | 0.335 |
| HZCP088 | 0.005047 | 0.00129  | 5.24E-04 | 0.007616 | 0.058938 | 0        | 0.009639 | 0        | 0.542 |
| HZCP089 | 0.001559 | 4.74E-04 | 2.40E-05 | 0.001014 | 0.198989 | 0        | 0.014049 | 0        | 0.6   |
| HZCP090 | 0.004285 | 0.001872 | 6.81E-04 | 0.00387  | 0.00292  | 0.010488 | 0.053305 | 0        | 0.403 |
| HZCP091 | 0.002707 | 3.79E-04 | 3.53E-04 | 0.004715 | 0.011219 | 7.09E-04 | 6.95E-04 | 0        | 0.607 |
| HZCP092 | 0        | 0.002888 | 2.06E-04 | 0        | 0.004346 | 2.30E-05 | 0.021339 | 0        | 0.747 |
| HZCP093 | 0.001062 | 4.70E-04 | 2.09E-04 | 0.014135 | 0.058888 | 0.014552 | 0.024834 | 6.80E-05 | 0.299 |
| HZCP094 | 0.004424 | 0.001144 | 1.05E-04 | 0.007586 | 0.059904 | 0.015808 | 0.005766 | 0        | 0.571 |
| HZCP095 | 0.004757 | 1.74E-04 | 4.22E-04 | 0.003412 | 0.010028 | 0.002547 | 0.013795 | 0        | 0.389 |
| HZCP096 | 1.50E-05 | 2.20E-05 | 6.70E-05 | 4.98E-04 | 0.049803 | 0        | 4.10E-05 | 0        | 0.893 |
| HZCP097 | 0        | 1.20E-05 | 0.005062 | 0        | 0        | 0        | 0.009019 | 0        | 0.973 |
| HZCP098 | 0.004815 | 0.00125  | 0.001234 | 6.23E-04 | 1.13E-04 | 0.002336 | 1.04E-04 | 0        | 0.628 |
| HZCP099 | 0.014115 | 0.005423 | 0.001637 | 0.009482 | 0.00664  | 0.005458 | 0.005228 | 0        | 0.124 |
| HZCP100 | 0.005728 | 0.004893 | 6.72E-04 | 0.005405 | 0.010877 | 0.006846 | 0.025389 | 0        | 0.144 |
| HZCP101 | 0.001125 | 3.19E-04 | 0.001518 | 9.25E-04 | 0.045231 | 0.002566 | 0.013784 | 3.30E-05 | 0.071 |
| HZCP102 | 2.69E-04 | 0        | 0.001587 | 0.01502  | 0.128554 | 0        | 0.036668 | 0        | 0.669 |
| HZCP103 | 0.002318 | 0.003239 | 3.92E-04 | 1.32E-04 | 0.002847 | 0        | 0.006095 | 9.80E-05 | 0.603 |
| HZCP104 | 0.003532 | 5.17E-04 | 0.014236 | 3.36E-04 | 2.10E-05 | 0        | 0.004626 | 0        | 0.705 |
| HZCP105 | 0.00263  | 8.43E-04 | 4.57E-04 | 5.30E-05 | 2.40E-05 | 0        | 0.012937 | 0        | 0.86  |
| HZCP106 | 0.003125 | 0.00302  | 0.001253 | 0.00205  | 0.040058 | 0.005673 | 0.00457  | 0        | 0.148 |

|         |          |          |          |          |          |          |          |          |       |
|---------|----------|----------|----------|----------|----------|----------|----------|----------|-------|
| HZCP107 | 0.012465 | 0.004528 | 0.003056 | 0.005297 | 0.033804 | 0        | 0.062655 | 0        | 0.321 |
| HZCP108 | 9.69E-04 | 2.63E-04 | 0.001831 | 0.011705 | 0.031965 | 0        | 0.007051 | 0        | 0.568 |
| HZCP109 | 0.002068 | 0.007852 | 0.00331  | 0.008621 | 8.50E-05 | 3.75E-04 | 0.003372 | 0        | 0.306 |
| HZCP110 | 0.001125 | 3.73E-04 | 0.001657 | 9.92E-04 | 8.70E-05 | 5.30E-05 | 6.80E-04 | 0        | 0.719 |
| HZCP111 | 0.005693 | 7.67E-04 | 0        | 0.001911 | 0.024207 | 0        | 0.001141 | 2.65E-04 | 0.595 |
| HZCP112 | 0.010437 | 0.003268 | 3.30E-04 | 7.40E-04 | 0.082677 | 0        | 0.00213  | 0        | 0.573 |
| HZCP113 | 0.003468 | 3.08E-04 | 0.002806 | 0.00185  | 8.37E-04 | 0        | 3.90E-05 | 0        | 0.915 |
| HZCP114 | 0.001982 | 0.001778 | 0.010111 | 0.004512 | 0.003433 | 5.76E-04 | 4.35E-04 | 0        | 0.442 |
| HZCP115 | 0        | 0        | 0.113136 | 4.90E-05 | 2.90E-05 | 0        | 0.023524 | 0        | 0.87  |
| HZCP116 | 0.00182  | 0        | 4.97E-04 | 3.74E-04 | 0.168709 | 0        | 0.003082 | 1.48E-04 | 0.471 |
| HZCP117 | 0.007509 | 0.001763 | 0.004631 | 2.55E-04 | 0.046397 | 0        | 0.01363  | 3.30E-05 | 0.172 |
| HZCP118 | 0.013081 | 0.001405 | 5.13E-04 | 4.37E-04 | 0.075805 | 0.001112 | 0.031066 | 1.59E-04 | 0.182 |

Table S10. the corresponding output value and POD value of each optimal microbial marker in the in the SP (n=37) and HC (n=50) groups.

| SampleID | OTU1721<br>(Candidate_divisi<br>on_TM7_norank) | OTU1277<br>(Actinomyces) | OTU1642<br>(Haemophilus) | OTU1868<br>(Prevotella) | OTU1086<br>(Family_XIII_Inc<br>ertae_Sedis) | OTU1454<br>(Fusobacteri<br>um) | OTU2268<br>(ASCC02_no<br>rank) | OTU648<br>(Oribacteriu<br>m) | POD<br>value |
|----------|------------------------------------------------|--------------------------|--------------------------|-------------------------|---------------------------------------------|--------------------------------|--------------------------------|------------------------------|--------------|
| HC003    | 0.001369                                       | 0.033449                 | 0.005352                 | 0.039494                | 0.006138                                    | 5.73E-04                       | 3.33E-04                       | 0.0023                       | 0.017        |
| HC007    | 3.13E-04                                       | 0.007741                 | 0.017524                 | 0.012462                | 0.011266                                    | 0.001013                       | 9.40E-05                       | 0.002096                     | 0.003        |
| HC013    | 3.20E-05                                       | 0.007701                 | 0.010905                 | 0.003033                | 0.006206                                    | 0.001229                       | 2.30E-05                       | 0.004071                     | 0.058        |
| HC015    | 0                                              | 0.005912                 | 0.013805                 | 0.008458                | 0.010748                                    | 0.002095                       | 5.32E-04                       | 0.005735                     | 0.261        |
| HC017    | 6.04E-04                                       | 0.00255                  | 0.007753                 | 0.004342                | 0.009107                                    | 0.002293                       | 5.93E-04                       | 0.005534                     | 0.008        |
| HC021    | 0.009193                                       | 0.002388                 | 0.04043                  | 0.003116                | 0.012428                                    | 0.002735                       | 0.001919                       | 0.003951                     | 0.03         |
| HC024    | 3.31E-04                                       | 0.015557                 | 0.077441                 | 0.011278                | 0.001087                                    | 7.55E-04                       | 2.75E-04                       | 8.34E-04                     | 0.059        |
| HC026    | 5.20E-05                                       | 1.85E-04                 | 0.044503                 | 0.001687                | 0.004666                                    | 3.81E-04                       | 4.06E-04                       | 0.002227                     | 0.199        |
| HC028    | 0                                              | 0.009092                 | 0.523224                 | 0.007177                | 0.003633                                    | 2.87E-04                       | 4.08E-04                       | 0.007974                     | 0.05         |
| HC032    | 4.94E-04                                       | 0.008442                 | 0.043138                 | 0.004432                | 0.007749                                    | 0.001756                       | 1.98E-04                       | 0.012718                     | 0.003        |
| HC036    | 0.008754                                       | 0.028748                 | 9.21E-04                 | 6.80E-05                | 0.005027                                    | 1.03E-04                       | 0                              | 0.003283                     | 0.34         |
| HC046    | 0.00155                                        | 0.009403                 | 0.0028                   | 0.002046                | 0.006448                                    | 3.63E-04                       | 2.47E-04                       | 0.001403                     | 0.036        |
| HC050    | 0                                              | 0.006259                 | 0.024952                 | 0.006289                | 0.015059                                    | 6.83E-04                       | 8.80E-05                       | 0.012366                     | 0.089        |
| HC051    | 4.40E-05                                       | 0.003955                 | 0.042304                 | 0.03884                 | 0.008016                                    | 6.63E-04                       | 3.45E-04                       | 0.002194                     | 0.002        |
| HC054    | 0.005909                                       | 4.42E-04                 | 0.021018                 | 0.019237                | 0.001122                                    | 0.025255                       | 3.17E-04                       | 0.005146                     | 0.202        |
| HC056    | 8.98E-04                                       | 0.002066                 | 0.004413                 | 0.021767                | 0.02172                                     | 0.002602                       | 2.21E-04                       | 0.005414                     | 0.011        |
| HC057    | 0.00188                                        | 5.31E-04                 | 0.012493                 | 0.011136                | 0.005912                                    | 0.002534                       | 5.13E-04                       | 0.003724                     | 0.093        |
| HC061    | 3.00E-04                                       | 0.01336                  | 0.005235                 | 0.003995                | 0.005903                                    | 7.10E-05                       | 7.10E-05                       | 0.002723                     | 0.059        |
| HC062    | 2.57E-04                                       | 0.009684                 | 0.236429                 | 0.005711                | 8.08E-04                                    | 6.19E-04                       | 3.57E-04                       | 0.003664                     | 0.035        |
| HC064    | 0.001268                                       | 0.061351                 | 0.005501                 | 0.012675                | 3.61E-04                                    | 2.78E-04                       | 0                              | 2.53E-04                     | 0.537        |
| HC065    | 0.001005                                       | 0.015259                 | 0.042193                 | 0.015191                | 0.011385                                    | 0.002078                       | 9.40E-05                       | 0.003652                     | 0.003        |
| HC068    | 0                                              | 1.38E-04                 | 0.042235                 | 0.002341                | 0.003702                                    | 5.03E-04                       | 1.97E-04                       | 0.003018                     | 0.452        |
| HC070    | 2.30E-05                                       | 0.008159                 | 0.183667                 | 0.041403                | 0.004387                                    | 6.17E-04                       | 1.41E-04                       | 0.006564                     | 0            |
| HC072    | 9.07E-04                                       | 0.002607                 | 0.030765                 | 0.022539                | 0.020652                                    | 0.004085                       | 4.10E-05                       | 0.023355                     | 0.022        |
| HC073    | 1.09E-04                                       | 0.01144                  | 0.01952                  | 0.005493                | 0.008694                                    | 0.001907                       | 4.60E-04                       | 0.007519                     | 0.002        |
| HC076    | 4.23E-04                                       | 7.90E-05                 | 0.007311                 | 0.005004                | 0.004159                                    | 4.27E-04                       | 2.02E-04                       | 0.001655                     | 0.393        |
| HC077    | 0.001086                                       | 8.40E-05                 | 0.002704                 | 0.007448                | 0.00147                                     | 1.27E-04                       | 1.56E-04                       | 7.74E-04                     | 0.601        |
| HC078    | 3.30E-05                                       | 0.017866                 | 0.005647                 | 9.67E-04                | 0.002189                                    | 0.00207                        | 1.61E-04                       | 0.006715                     | 0.276        |
| HC079    | 3.04E-04                                       | 7.10E-04                 | 0.201834                 | 0.016146                | 0.003978                                    | 0.001438                       | 0.002265                       | 0.004405                     | 0.044        |
| HC088    | 0.00294                                        | 9.29E-04                 | 0.097642                 | 0.004035                | 0.00461                                     | 0.003448                       | 1.40E-04                       | 0.011578                     | 0.014        |
| HC094    | 0.003705                                       | 0.080985                 | 0.00588                  | 0.00214                 | 0.00274                                     | 0.002687                       | 8.10E-05                       | 0.003766                     | 0.103        |
| HC096    | 2.96E-04                                       | 2.99E-04                 | 0.158891                 | 0.017004                | 0.00399                                     | 0.001123                       | 3.25E-04                       | 0.00227                      | 0.059        |
| HC100    | 1.76E-04                                       | 0.002893                 | 0.075738                 | 0.008155                | 0.003772                                    | 0.00101                        | 4.01E-04                       | 0.005051                     | 0.003        |
| HC102    | 0.003297                                       | 0.002294                 | 0.082584                 | 0.009738                | 0.007236                                    | 3.74E-04                       | 4.87E-04                       | 0.00664                      | 0.004        |
| HC103    | 0                                              | 0.003709                 | 0.292087                 | 0                       | 1.44E-04                                    | 0                              | 0                              | 2.08E-04                     | 0.952        |
| HC105    | 0                                              | 0.0091                   | 0.043815                 | 0.008126                | 0.007985                                    | 2.52E-04                       | 8.45E-04                       | 0.009312                     | 0.065        |
| HC111    | 0.001751                                       | 0.002827                 | 0.040236                 | 0.021561                | 0.008379                                    | 0.001766                       | 7.64E-04                       | 0.007066                     | 0.001        |
| HC113    | 1.27E-04                                       | 0.015064                 | 0.160833                 | 0.0207                  | 0.00427                                     | 4.03E-04                       | 4.12E-04                       | 0.015664                     | 0.003        |
| HC114    | 0.001147                                       | 0                        | 0.023041                 | 0.004104                | 0.004932                                    | 0.00353                        | 4.00E-05                       | 0.003156                     | 0.369        |
| HC117    | 2.23E-04                                       | 1.80E-04                 | 0.004576                 | 0.004434                | 0.00902                                     | 0.001677                       | 9.00E-05                       | 0.009557                     | 0.191        |
| HC120    | 2.22E-04                                       | 5.20E-05                 | 0.072272                 | 0.001986                | 0.016742                                    | 0.001677                       | 2.93E-04                       | 0.001399                     | 0.344        |
| HC122    | 4.88E-04                                       | 0.014528                 | 0.00131                  | 0.001245                | 0.016521                                    | 0.001419                       | 4.10E-04                       | 0.003581                     | 0.033        |
| HC124    | 4.70E-05                                       | 0.005273                 | 5.10E-04                 | 0.002495                | 0.005066                                    | 2.07E-04                       | 3.50E-05                       | 0.002528                     | 0.184        |
| HC127    | 8.36E-04                                       | 0.022124                 | 0.133054                 | 0.00254                 | 0.002685                                    | 2.95E-04                       | 2.06E-04                       | 0.002436                     | 0.041        |
| HC128    | 2.74E-04                                       | 2.64E-04                 | 0.052773                 | 0.005778                | 0.009281                                    | 2.34E-04                       | 0                              | 0.003426                     | 0.277        |
| HC129    | 0.005408                                       | 0.007429                 | 0.008218                 | 0.004271                | 0.004366                                    | 2.76E-04                       | 2.51E-04                       | 0.002139                     | 0.01         |
| HC132    | 1.12E-04                                       | 0.019835                 | 0.002629                 | 3.46E-04                | 0.002522                                    | 2.92E-04                       | 0                              | 0.001309                     | 0.42         |
| HC134    | 1.26E-04                                       | 6.42E-04                 | 0.102917                 | 0.016589                | 0.002839                                    | 0.006761                       | 1.06E-04                       | 0.002756                     | 0.085        |
| HC140    | 8.11E-04                                       | 0.02381                  | 0.031514                 | 0.024338                | 0.00228                                     | 0.011165                       | 2.83E-04                       | 0.003374                     | 0.05         |
| HC149    | 0                                              | 5.45E-04                 | 0.0047                   | 0.00166                 | 0.002483                                    | 3.08E-04                       | 4.39E-04                       | 4.97E-04                     | 0.878        |
| SP01     | 0                                              | 6.20E-05                 | 0                        | 0                       | 1.80E-05                                    | 3.81E-04                       | 0                              | 0                            | 0.973        |
| SP02     | 0                                              | 0                        | 0.010703                 | 9.74E-04                | 0                                           | 2.10E-04                       | 3.90E-05                       | 0                            | 0.929        |
| SP03     | 0                                              | 0.01399                  | 0.005207                 | 0.005175                | 0.002643                                    | 9.48E-04                       | 0.001085                       | 2.79E-04                     | 0.638        |
| SP04     | 0                                              | 0.002275                 | 0.003129                 | 0.001372                | 0.005808                                    | 2.90E-04                       | 4.50E-04                       | 5.89E-04                     | 0.682        |

|      |          |          |          |          |          |          |          |          |       |
|------|----------|----------|----------|----------|----------|----------|----------|----------|-------|
| SP05 | 0        | 0        | 0.002515 | 0        | 0.003905 | 0.00104  | 5.82E-04 | 3.03E-04 | 0.831 |
| SP06 | 0        | 8.57E-04 | 0.046589 | 4.10E-04 | 4.80E-04 | 0        | 7.10E-05 | 0.00162  | 0.742 |
| SP07 | 0        | 1.15E-04 | 0.002348 | 0        | 9.33E-04 | 0        | 0        | 1.10E-04 | 0.998 |
| SP08 | 0        | 0        | 0.057881 | 0        | 0.017482 | 4.30E-05 | 0        | 0.00161  | 0.78  |
| SP09 | 0        | 1.69E-04 | 0.002231 | 2.46E-04 | 0.004585 | 5.90E-05 | 0        | 4.48E-04 | 0.918 |
| SP10 | 0        | 9.01E-04 | 7.70E-05 | 1.72E-04 | 0.004593 | 8.30E-05 | 0.002225 | 3.30E-04 | 0.885 |
| SP11 | 0        | 9.90E-05 | 0.003908 | 0.009207 | 0.001538 | 2.26E-04 | 5.40E-05 | 7.61E-04 | 0.741 |
| SP12 | 0        | 2.71E-04 | 0.004862 | 1.87E-04 | 3.78E-04 | 0        | 0        | 8.39E-04 | 0.948 |
| SP13 | 0        | 0.001033 | 0.053133 | 5.92E-04 | 4.45E-04 | 1.16E-04 | 2.40E-04 | 0.002573 | 0.577 |
| SP14 | 0        | 7.00E-04 | 0.01882  | 3.24E-04 | 0        | 0        | 2.30E-04 | 0.001005 | 0.746 |
| SP15 | 6.70E-04 | 0.001103 | 0.004994 | 0.006074 | 0.008609 | 2.33E-04 | 8.62E-04 | 0.003407 | 0.031 |
| SP16 | 0        | 2.26E-04 | 1.79E-04 | 3.50E-05 | 3.10E-05 | 0        | 0        | 0        | 1     |
| SP17 | 6.64E-04 | 0.008892 | 9.84E-04 | 6.74E-04 | 0.009849 | 0.001141 | 1.94E-04 | 0.00133  | 0.201 |
| SP18 | 1.91E-04 | 2.66E-04 | 0.00186  | 4.46E-04 | 0.00694  | 3.28E-04 | 0        | 0.007168 | 0.407 |
| SP19 | 0        | 0        | 0.008446 | 7.20E-05 | 5.45E-04 | 0        | 6.20E-05 | 1.57E-04 | 0.97  |
| SP20 | 0        | 0        | 0.254437 | 6.27E-04 | 0.0039   | 6.80E-05 | 2.80E-05 | 0.001928 | 0.728 |
| SP21 | 0        | 0.005181 | 0.011327 | 1.17E-04 | 0        | 5.90E-05 | 1.08E-04 | 5.80E-05 | 0.909 |
| SP22 | 0        | 0.00102  | 0.010793 | 1.40E-04 | 0.004679 | 0        | 1.46E-04 | 4.15E-04 | 0.887 |
| SP23 | 0        | 1.42E-04 | 0.040097 | 0.001057 | 0.058921 | 8.20E-05 | 0.002542 | 0.003726 | 0.537 |
| SP24 | 5.57E-04 | 3.40E-04 | 0.090914 | 0.008861 | 0.004806 | 0.002585 | 2.06E-04 | 0.00785  | 0.085 |
| SP25 | 4.20E-05 | 5.98E-04 | 0.001559 | 0.001484 | 9.50E-05 | 3.86E-04 | 0        | 9.61E-04 | 0.579 |
| SP26 | 0        | 2.40E-05 | 0.036871 | 0.003535 | 0.003204 | 0.001428 | 1.10E-04 | 0.001551 | 0.535 |
| SP27 | 0        | 3.20E-04 | 0.014678 | 4.81E-04 | 0.084355 | 0        | 0        | 0.011642 | 0.802 |
| SP28 | 0        | 0.001524 | 0.013569 | 0.004721 | 0.011997 | 1.25E-04 | 1.33E-04 | 0.001787 | 0.381 |
| SP29 | 0        | 0.003188 | 0.004899 | 0.002568 | 0.002849 | 2.60E-05 | 4.90E-05 | 0.003987 | 0.624 |
| SP30 | 2.92E-04 | 2.40E-05 | 0.049563 | 0.006936 | 0.00156  | 0.00177  | 0        | 0.002051 | 0.517 |
| SP31 | 0        | 0.00172  | 6.00E-05 | 0.001065 | 9.97E-04 | 0        | 0        | 1.81E-04 | 1     |
| SP32 | 0        | 1.70E-04 | 0.052511 | 0.001069 | 0.002767 | 9.50E-05 | 0        | 0.005494 | 0.79  |
| SP33 | 0        | 1.16E-04 | 0.005914 | 8.54E-04 | 0        | 2.20E-05 | 0        | 1.60E-05 | 0.995 |
| SP34 | 0.001251 | 0.001028 | 0.012517 | 0.002153 | 0.005566 | 4.83E-04 | 0        | 0.027374 | 0.19  |
| SP35 | 0        | 1.71E-04 | 0.006392 | 0.001121 | 1.32E-04 | 1.90E-05 | 0        | 2.81E-04 | 0.997 |
| SP36 | 0        | 1.13E-04 | 0.076602 | 0.001402 | 0.001474 | 4.40E-04 | 3.70E-05 | 0.005325 | 0.628 |
| SP37 | 0        | 0.037774 | 3.34E-04 | 0        | 0        | 0.010819 | 2.51E-04 | 0.013218 | 0.616 |

Table S11. The levels of Ig-G antibody

| IgG levels in tongue coating samples | Number | IgG levels in fecal samples | Number | IgG levels in tongue coating samples | Number | IgG levels in fecal samples | Number |
|--------------------------------------|--------|-----------------------------|--------|--------------------------------------|--------|-----------------------------|--------|
| 0.78                                 | HC-001 | 0.78                        | HC-001 | 214.03                               | GY-802 | 201.13                      | GY-816 |
| 1.56                                 | HC-002 | 1.56                        | HC-002 | 524.97                               | GY-803 | 122.54                      | GY-817 |
| 0.74                                 | HC-003 | 0.74                        | HC-003 | 282.51                               | GY-804 | 446.07                      | GY-818 |
| 0.37                                 | HC-004 | 0.37                        | HC-004 | 973.87                               | GY-805 |                             |        |
| 0.38                                 | HC-005 | 0.38                        | HC-005 | 848.58                               | GY-806 |                             |        |
| 2.31                                 | HC-006 | 2.31                        | HC-006 | 147.04                               | GY-807 |                             |        |
| 10.13                                | GY-704 | 18.75                       | GY-712 | 112.88                               | GY-808 |                             |        |
| 11.39                                | GY-701 | 47.26                       | GY-703 | 420.79                               | GY-809 |                             |        |
| 18.75                                | GY-712 | 23.75                       | GY-713 | 188.59                               | GY-810 |                             |        |
| 25.48                                | GY-702 | 18.86                       | GY-714 | 230.16                               | GY-811 |                             |        |
| 47.26                                | GY-703 | 41.96                       | GY-715 | 452.60                               | GY-812 |                             |        |
| 23.75                                | GY-713 | 13.03                       | GY-719 | 336.60                               | GY-813 |                             |        |
| 18.86                                | GY-714 | 17.21                       | GY-709 | 254.92                               | GY-814 |                             |        |
| 41.96                                | GY-715 | 29.31                       | GY-721 | 247.17                               | GY-815 |                             |        |
| 54.28                                | GY-716 | 10.11                       | GY-724 | 201.13                               | GY-816 |                             |        |
| 313.62                               | GY-718 | 15.26                       | GY-717 | 122.54                               | GY-817 |                             |        |
| 13.03                                | GY-719 | 19.64                       | GY-736 | 446.07                               | GY-818 |                             |        |
| 17.21                                | GY-709 | 21.29                       | GY-720 | 448.21                               | GY-819 |                             |        |
| 29.31                                | GY-721 | 25.16                       | GY-725 | 279.65                               | GY-820 |                             |        |
| 27.98                                | GY-722 | 11.27                       | GY-729 | 312.12                               | GY-821 |                             |        |
| 13.86                                | GY-726 | 22.74                       | GY-711 | 225.38                               | GY-822 |                             |        |
| 341.49                               | GY-727 | 87.76                       | GY-737 |                                      |        |                             |        |
| 39.75                                | GY-728 | 308.06                      | GY-730 |                                      |        |                             |        |
| 23.57                                | GY-708 | 43.96                       | GY-723 |                                      |        |                             |        |
| 15.64                                | GY-731 | 45.64                       | GY-705 |                                      |        |                             |        |
| 10.11                                | GY-724 | 37.46                       | GY-733 |                                      |        |                             |        |
| 15.26                                | GY-717 | 21.57                       | GY-735 |                                      |        |                             |        |
| 57.27                                | GY-732 | 327.93                      | GY-706 |                                      |        |                             |        |
| 31.58                                | GY-734 | 13.67                       | GY-707 |                                      |        |                             |        |
| 19.64                                | GY-736 | 451.37                      | GY-801 |                                      |        |                             |        |
| 21.29                                | GY-720 | 214.03                      | GY-802 |                                      |        |                             |        |
| 25.16                                | GY-725 | 524.97                      | GY-803 |                                      |        |                             |        |
| 48.14                                | GY-710 | 282.51                      | GY-804 |                                      |        |                             |        |
| 11.27                                | GY-729 | 973.87                      | GY-805 |                                      |        |                             |        |
| 22.74                                | GY-711 | 848.58                      | GY-806 |                                      |        |                             |        |
| 87.76                                | GY-737 | 147.04                      | GY-807 |                                      |        |                             |        |
| 308.06                               | GY-730 | 112.88                      | GY-808 |                                      |        |                             |        |
| 43.96                                | GY-723 | 420.79                      | GY-809 |                                      |        |                             |        |
| 45.64                                | GY-705 | 188.59                      | GY-810 |                                      |        |                             |        |
| 37.46                                | GY-733 | 230.16                      | GY-811 |                                      |        |                             |        |
| 21.57                                | GY-735 | 452.60                      | GY-812 |                                      |        |                             |        |
| 327.93                               | GY-706 | 336.60                      | GY-813 |                                      |        |                             |        |
| 13.67                                | GY-707 | 254.92                      | GY-814 |                                      |        |                             |        |
| 451.37                               | GY-801 | 247.17                      | GY-815 |                                      |        |                             |        |

**Table S12. The detailed values of oral microbial diversity index and observed OTUs among CP (n=72), SP (n=37), and HC (n=150) groups.**

| sample | reads  | label | ace        | chao       | shannon  | simpson | coverage | observed_otus |
|--------|--------|-------|------------|------------|----------|---------|----------|---------------|
| CP01   | 27880  | 0.97  | 344.611252 | 313.37037  | 2.561866 | 0.18149 | 0.997561 | 229           |
| CP52   | 56632  | 0.97  | 259        | 259        | 3.142361 | 0.0916  | 1        | 259           |
| CP51   | 172772 | 0.97  | 347        | 347        | 2.998595 | 0.13053 | 1        | 347           |
| CP50   | 28485  | 0.97  | 318.67634  | 291.769231 | 2.585928 | 0.14805 | 0.997999 | 169           |
| CP49   | 90016  | 0.97  | 403        | 403        | 3.059276 | 0.1188  | 1        | 403           |
| CP48   | 19696  | 0.97  | 425.569711 | 413.306122 | 3.055393 | 0.16901 | 0.995278 | 326           |
| CP47   | 22461  | 0.97  | 542.735041 | 488.363636 | 3.185428 | 0.0996  | 0.995147 | 310           |
| CP53   | 108876 | 0.97  | 476        | 476        | 3.355053 | 0.07078 | 1        | 476           |
| CP46   | 31642  | 0.97  | 601.078167 | 511.166667 | 2.549721 | 0.26033 | 0.995986 | 363           |
| CP44   | 7544   | 0.97  | 325.7291   | 314.25     | 3.317562 | 0.082   | 0.989926 | 243           |
| CP43   | 7767   | 0.97  | 333.542274 | 336.870968 | 3.636535 | 0.059   | 0.989958 | 240           |
| CP42   | 8003   | 0.97  | 575.701001 | 512.763158 | 3.876145 | 0.05611 | 0.985131 | 328           |
| CP41   | 12460  | 0.97  | 212.523766 | 144.333333 | 1.717017 | 0.37952 | 0.99679  | 101           |
| CP40   | 15703  | 0.97  | 435.777861 | 371.529412 | 3.216012 | 0.1065  | 0.994651 | 269           |
| CP39   | 12474  | 0.97  | 532.015553 | 454.117647 | 3.808013 | 0.07051 | 0.991502 | 345           |
| CP45   | 38617  | 0.97  | 585.017379 | 609.632653 | 3.41768  | 0.09439 | 0.996789 | 454           |
| CP54   | 6995   | 0.97  | 440.705301 | 362.028571 | 2.689706 | 0.16955 | 0.986133 | 229           |
| CP55   | 14594  | 0.97  | 595.984021 | 601.266667 | 3.769353 | 0.07717 | 0.990613 | 446           |
| CP56   | 8041   | 0.97  | 476.219313 | 413.692308 | 2.999935 | 0.13108 | 0.986818 | 271           |
| CP72   | 39452  | 0.97  | 634.100176 | 540.773585 | 3.1591   | 0.10149 | 0.99673  | 385           |
| CP71   | 48811  | 0.97  | 523.971577 | 450.125    | 2.896086 | 0.13585 | 0.997951 | 347           |
| CP70   | 67321  | 0.97  | 483.016126 | 376.692308 | 2.127284 | 0.30013 | 0.998619 | 267           |
| CP69   | 10808  | 0.97  | 330.894238 | 326.058824 | 2.822478 | 0.17923 | 0.992876 | 240           |
| CP68   | 84088  | 0.97  | 290        | 290        | 2.879879 | 0.12057 | 1        | 290           |
| CP67   | 111884 | 0.97  | 267        | 267        | 3.311838 | 0.06567 | 1        | 267           |
| CP66   | 59690  | 0.97  | 335        | 335        | 2.41537  | 0.23542 | 1        | 335           |
| CP65   | 34625  | 0.97  | 295.914076 | 292.171429 | 1.421591 | 0.37053 | 0.997863 | 215           |
| CP64   | 63536  | 0.97  | 415        | 415        | 3.7169   | 0.04816 | 1        | 415           |
| CP63   | 56018  | 0.97  | 248        | 248        | 2.976055 | 0.12042 | 1        | 248           |
| CP62   | 42534  | 0.97  | 376        | 376        | 3.704655 | 0.049   | 1        | 376           |
| CP61   | 61730  | 0.97  | 476        | 476        | 3.632293 | 0.06014 | 1        | 476           |
| CP60   | 16660  | 0.97  | 352.933798 | 303.774194 | 2.512708 | 0.17169 | 0.995618 | 219           |
| CP58   | 8837   | 0.97  | 462.616064 | 399.576923 | 1.52969  | 0.55165 | 0.988797 | 213           |
| CP57   | 7843   | 0.97  | 524.874687 | 420.976744 | 3.413037 | 0.07587 | 0.985847 | 279           |
| CP38   | 13929  | 0.97  | 206.648774 | 183.1875   | 2.77571  | 0.16017 | 0.997487 | 146           |
| CP37   | 23414  | 0.97  | 231.528256 | 242.105263 | 3.045968 | 0.09894 | 0.998078 | 190           |
| CP59   | 69868  | 0.97  | 310        | 310        | 2.285982 | 0.23817 | 1        | 310           |
| CP35   | 103978 | 0.97  | 178        | 178        | 2.319593 | 0.1565  | 1        | 178           |
| CP15   | 7532   | 0.97  | 588.975264 | 483.914894 | 3.844291 | 0.05787 | 0.984068 | 332           |
| CP14   | 52168  | 0.97  | 460        | 460        | 3.767754 | 0.06085 | 1        | 460           |
| CP13   | 16008  | 0.97  | 397.675171 | 383.021739 | 3.014422 | 0.12198 | 0.994128 | 288           |
| CP12   | 16787  | 0.97  | 496.332896 | 521.25     | 2.873348 | 0.14491 | 0.992792 | 370           |
| CP11   | 28852  | 0.97  | 553.462202 | 596        | 3.905855 | 0.04498 | 0.995945 | 422           |
| CP10   | 9906   | 0.97  | 497.278351 | 431.4      | 3.200432 | 0.09513 | 0.989098 | 303           |
| CP16   | 13566  | 0.97  | 521.639193 | 529.518519 | 3.867469 | 0.05908 | 0.991449 | 406           |
| CP08   | 99290  | 0.97  | 195        | 195        | 2.551229 | 0.12834 | 1        | 195           |
| CP06   | 115734 | 0.97  | 413        | 413        | 3.439571 | 0.06625 | 1        | 413           |
| CP05   | 15122  | 0.97  | 391.051128 | 447.8      | 3.437891 | 0.10535 | 0.994379 | 305           |
| CP04   | 19175  | 0.97  | 162.113338 | 127.2      | 1.104302 | 0.60385 | 0.998279 | 92            |
| CP03   | 116888 | 0.97  | 431        | 431        | 3.791821 | 0.05193 | 1        | 431           |
| CP02   | 13110  | 0.97  | 325.778033 | 337.935484 | 2.858169 | 0.17284 | 0.994203 | 246           |
| CP36   | 20585  | 0.97  | 635.861636 | 523.042553 | 3.592884 | 0.07215 | 0.994073 | 366           |
| CP07   | 6796   | 0.97  | 387.412661 | 379.133333 | 3.393565 | 0.09914 | 0.986168 | 282           |
| CP17   | 15173  | 0.97  | 528.669521 | 574.133333 | 2.8917   | 0.22176 | 0.9913   | 382           |
| CP09   | 29229  | 0.97  | 551.062129 | 485.765957 | 3.637113 | 0.06831 | 0.996476 | 374           |

|       |        |      |            |            |          |         |          |     |
|-------|--------|------|------------|------------|----------|---------|----------|-----|
| CP19  | 11464  | 0.97 | 606.436051 | 484.478261 | 2.539913 | 0.21797 | 0.988747 | 305 |
| CP34  | 32646  | 0.97 | 292.843483 | 279.333333 | 2.061416 | 0.25102 | 0.998162 | 181 |
| CP18  | 17946  | 0.97 | 524.63839  | 524.05     | 3.56953  | 0.08264 | 0.993425 | 409 |
| CP33  | 22755  | 0.97 | 438.099246 | 394.108108 | 3.057601 | 0.11319 | 0.996177 | 293 |
| CP32  | 6810   | 0.97 | 529.71597  | 478.083333 | 3.596202 | 0.06367 | 0.983113 | 296 |
| CP31  | 14166  | 0.97 | 614.86774  | 521.459016 | 3.86911  | 0.0488  | 0.990823 | 384 |
| CP30  | 106960 | 0.97 | 281        | 281        | 3.299599 | 0.07972 | 1        | 281 |
| CP28  | 12807  | 0.97 | 520.394016 | 384.965517 | 2.491365 | 0.20754 | 0.992582 | 231 |
| CP27  | 16155  | 0.97 | 783.693509 | 665.246154 | 3.98165  | 0.0459  | 0.990158 | 472 |
| CP29  | 18150  | 0.97 | 257.319427 | 263.6      | 2.224092 | 0.238   | 0.996915 | 202 |
| CP26  | 53996  | 0.97 | 316        | 316        | 3.296875 | 0.09276 | 1        | 316 |
| CP25  | 12798  | 0.97 | 444.227979 | 449.4375   | 3.168329 | 0.17056 | 0.991952 | 340 |
| CP24  | 37136  | 0.97 | 710.08295  | 639        | 3.127458 | 0.11295 | 0.996203 | 404 |
| CP23  | 36643  | 0.97 | 292.74985  | 218.5      | 1.501909 | 0.29494 | 0.998581 | 108 |
| CP22  | 12601  | 0.97 | 697.38807  | 602.444444 | 4.255485 | 0.03522 | 0.98889  | 448 |
| CP21  | 16015  | 0.97 | 543.529262 | 458.277778 | 2.342115 | 0.20574 | 0.992757 | 273 |
| CP20  | 48012  | 0.97 | 350        | 350        | 3.022175 | 0.13381 | 1        | 350 |
| HC090 | 57888  | 0.97 | 723.697811 | 719.544118 | 3.587789 | 0.07964 | 0.997392 | 553 |
| HC083 | 38740  | 0.97 | 687.516307 | 705.444444 | 3.288964 | 0.12787 | 0.995999 | 516 |
| HC085 | 40535  | 0.97 | 728.612948 | 672.245283 | 3.848113 | 0.03899 | 0.996349 | 467 |
| HC086 | 29743  | 0.97 | 565.11103  | 564.803571 | 3.278423 | 0.13533 | 0.995898 | 433 |
| HC087 | 36441  | 0.97 | 588.989065 | 501.357143 | 2.885708 | 0.12726 | 0.996872 | 348 |
| HC088 | 36922  | 0.97 | 659.691977 | 646.942857 | 3.929034 | 0.03907 | 0.995883 | 483 |
| HC089 | 40437  | 0.97 | 664.496384 | 715        | 3.562707 | 0.06861 | 0.996192 | 484 |
| HC084 | 30448  | 0.97 | 700.546851 | 584.559322 | 3.770142 | 0.04812 | 0.995435 | 422 |
| HC091 | 37313  | 0.97 | 948.178257 | 820.568966 | 3.258193 | 0.12228 | 0.994908 | 511 |
| HC099 | 25347  | 0.97 | 657.092341 | 646.208333 | 3.690999 | 0.06546 | 0.994082 | 491 |
| HC093 | 37151  | 0.97 | 665.095983 | 553.6      | 3.615062 | 0.05608 | 0.996528 | 416 |
| HC094 | 98172  | 0.97 | 447        | 447        | 3.49823  | 0.06429 | 1        | 447 |
| HC095 | 46027  | 0.97 | 719.148508 | 708.608108 | 3.779676 | 0.05173 | 0.996567 | 541 |
| HC096 | 36192  | 0.97 | 588.363437 | 641.956522 | 3.492702 | 0.06923 | 0.996353 | 454 |
| HC097 | 42128  | 0.97 | 793.818809 | 676.038961 | 3.667519 | 0.06093 | 0.996273 | 517 |
| HC098 | 27077  | 0.97 | 555.35162  | 572.132075 | 2.654441 | 0.19163 | 0.995051 | 404 |
| HC100 | 26606  | 0.97 | 829.116347 | 780.509091 | 3.925736 | 0.04067 | 0.993498 | 510 |
| HC082 | 42006  | 0.97 | 289.155339 | 273.833333 | 2.38855  | 0.2643  | 0.998786 | 203 |
| HC101 | 75060  | 0.97 | 605        | 605        | 3.476822 | 0.07694 | 1        | 605 |
| HC092 | 42683  | 0.97 | 800.052264 | 767.192308 | 3.4406   | 0.10648 | 0.996134 | 507 |
| HC081 | 17769  | 0.97 | 739.950194 | 635.54902  | 4.200669 | 0.03067 | 0.991783 | 428 |
| HC063 | 21417  | 0.97 | 942.305792 | 829.684211 | 4.067781 | 0.03691 | 0.991035 | 508 |
| HC079 | 16345  | 0.97 | 691.126762 | 621.018519 | 3.629899 | 0.06344 | 0.991068 | 425 |
| HC102 | 16902  | 0.97 | 658.217997 | 694.596491 | 3.932383 | 0.05125 | 0.990652 | 477 |
| HC059 | 43805  | 0.97 | 464.391013 | 484        | 2.988172 | 0.16899 | 0.997603 | 354 |
| HC060 | 32409  | 0.97 | 824.388665 | 887.515625 | 3.600499 | 0.0876  | 0.994014 | 595 |
| HC061 | 29157  | 0.97 | 625.564898 | 546.775862 | 3.161874 | 0.12849 | 0.995679 | 411 |
| HC062 | 71856  | 0.97 | 447        | 447        | 3.215059 | 0.10694 | 1        | 447 |
| HC064 | 29213  | 0.97 | 694.475704 | 586.625    | 2.986772 | 0.19157 | 0.995173 | 381 |
| HC065 | 41362  | 0.97 | 693.178502 | 768.294118 | 3.907439 | 0.03949 | 0.996156 | 522 |
| HC066 | 30228  | 0.97 | 577.980817 | 618.0625   | 3.712697 | 0.06034 | 0.995832 | 454 |
| HC067 | 35121  | 0.97 | 595.583917 | 593.842105 | 3.567269 | 0.07161 | 0.996071 | 428 |
| HC080 | 30229  | 0.97 | 643.494079 | 581.636364 | 3.289923 | 0.09393 | 0.995733 | 394 |
| HC068 | 28490  | 0.97 | 567.10649  | 493.283019 | 2.975724 | 0.15466 | 0.996069 | 376 |
| HC070 | 35365  | 0.97 | 527.270363 | 552.553191 | 3.496419 | 0.05394 | 0.996437 | 385 |
| HC071 | 33437  | 0.97 | 680.408018 | 699.916667 | 3.429589 | 0.0787  | 0.995364 | 501 |
| HC072 | 94170  | 0.97 | 600        | 600        | 3.789115 | 0.05737 | 1        | 600 |
| HC073 | 38144  | 0.97 | 547.46384  | 584.733333 | 3.560125 | 0.067   | 0.996775 | 418 |
| HC074 | 27274  | 0.97 | 832.319876 | 732.015873 | 3.715803 | 0.06303 | 0.993767 | 504 |
| HC075 | 37760  | 0.97 | 718.653626 | 700.182927 | 3.996952 | 0.03951 | 0.995789 | 547 |
| HC076 | 38456  | 0.97 | 503.526371 | 512.630435 | 2.196812 | 0.32819 | 0.996906 | 360 |

|       |       |      |            |            |          |         |          |     |
|-------|-------|------|------------|------------|----------|---------|----------|-----|
| HC077 | 26775 | 0.97 | 612.319924 | 512.053571 | 2.324609 | 0.24987 | 0.995107 | 360 |
| HC078 | 20167 | 0.97 | 618.636603 | 542.5      | 3.503192 | 0.06853 | 0.993752 | 355 |
| HC069 | 40530 | 0.97 | 664.626066 | 556.0625   | 3.556121 | 0.06964 | 0.996891 | 392 |
| HC103 | 20480 | 0.97 | 430.282999 | 386.625    | 3.339256 | 0.07709 | 0.995703 | 267 |
| HC139 | 28625 | 0.97 | 458.179782 | 472.170732 | 3.002927 | 0.12036 | 0.996472 | 349 |
| HC105 | 16184 | 0.97 | 752.857154 | 644.83871  | 4.058135 | 0.04832 | 0.990793 | 467 |
| HC130 | 25429 | 0.97 | 681.556942 | 582.078431 | 3.369256 | 0.07443 | 0.994376 | 383 |
| HC131 | 36212 | 0.97 | 667.739003 | 662.318182 | 3.787799 | 0.05367 | 0.995858 | 493 |
| HC132 | 25250 | 0.97 | 440.752128 | 374.525    | 3.22872  | 0.07962 | 0.996554 | 281 |
| HC133 | 36421 | 0.97 | 610.419444 | 500.958333 | 3.180461 | 0.09428 | 0.996815 | 362 |
| HC134 | 44745 | 0.97 | 628.014866 | 643.55     | 3.699865 | 0.05023 | 0.996916 | 486 |
| HC135 | 48532 | 0.97 | 579.489004 | 564.378788 | 3.574848 | 0.05686 | 0.997548 | 458 |
| HC136 | 42272 | 0.97 | 657.645689 | 685.781818 | 3.634004 | 0.05806 | 0.996499 | 488 |
| HC137 | 28242 | 0.97 | 717.725418 | 654.5625   | 3.405985 | 0.09813 | 0.994795 | 431 |
| HC138 | 31522 | 0.97 | 787.962186 | 710.611111 | 3.343091 | 0.10046 | 0.994956 | 478 |
| HC058 | 82078 | 0.97 | 381.892335 | 386        | 2.452852 | 0.25564 | 0.999111 | 313 |
| HC140 | 41488 | 0.97 | 864.059166 | 782.904762 | 3.394845 | 0.09248 | 0.995806 | 544 |
| HC141 | 27041 | 0.97 | 480.881901 | 407.219512 | 2.824617 | 0.1342  | 0.99645  | 296 |
| HC142 | 27648 | 0.97 | 726.699378 | 774.967213 | 3.861634 | 0.05679 | 0.993924 | 545 |
| HC143 | 47328 | 0.97 | 537.668178 | 560.489796 | 3.60808  | 0.05601 | 0.997528 | 422 |
| HC144 | 87790 | 0.97 | 593        | 593        | 3.737823 | 0.06593 | 1        | 593 |
| HC145 | 18813 | 0.97 | 715.671571 | 629.944444 | 3.726379 | 0.05953 | 0.992027 | 423 |
| HC146 | 49947 | 0.97 | 464.624629 | 438.344828 | 2.69077  | 0.14498 | 0.998158 | 294 |
| HC147 | 49095 | 0.97 | 615.726984 | 647.166667 | 3.097064 | 0.12553 | 0.997413 | 499 |
| HC148 | 33672 | 0.97 | 382.017085 | 371.375    | 2.684673 | 0.12934 | 0.997446 | 280 |
| HC129 | 54114 | 0.97 | 603        | 603        | 3.930203 | 0.04605 | 1        | 603 |
| HC128 | 24027 | 0.97 | 601.974321 | 594.714286 | 2.939499 | 0.16055 | 0.993965 | 429 |
| HC127 | 29054 | 0.97 | 637.176371 | 583.195652 | 3.56537  | 0.07067 | 0.995663 | 412 |
| HC126 | 25322 | 0.97 | 713.976024 | 580.508197 | 3.083549 | 0.13658 | 0.994471 | 421 |
| HC106 | 32968 | 0.97 | 875.975978 | 768.43662  | 3.758322 | 0.07314 | 0.994692 | 554 |
| HC107 | 21724 | 0.97 | 774.695812 | 655.119403 | 4.022666 | 0.03653 | 0.992727 | 470 |
| HC108 | 43590 | 0.97 | 493.915179 | 539.236842 | 3.593571 | 0.05728 | 0.997637 | 401 |
| HC109 | 21480 | 0.97 | 692.209452 | 644.306122 | 3.09088  | 0.11576 | 0.992877 | 407 |
| HC110 | 38647 | 0.97 | 395.796259 | 414.794118 | 3.164184 | 0.09106 | 0.997671 | 297 |
| HC111 | 24572 | 0.97 | 634.699063 | 647.064516 | 4.079538 | 0.03945 | 0.994465 | 499 |
| HC112 | 27647 | 0.97 | 579.339064 | 509        | 2.865648 | 0.13665 | 0.995732 | 332 |
| HC113 | 41127 | 0.97 | 653.631468 | 576.6875   | 3.514612 | 0.05692 | 0.996839 | 402 |
| HC114 | 26858 | 0.97 | 652.482846 | 668.655738 | 3.58187  | 0.08778 | 0.994378 | 483 |
| HC104 | 22999 | 0.97 | 733.967277 | 640.444444 | 3.29171  | 0.11129 | 0.993565 | 439 |
| HC115 | 39842 | 0.97 | 763.676944 | 666.671875 | 3.909347 | 0.04421 | 0.99631  | 499 |
| HC117 | 31562 | 0.97 | 746.148518 | 690.109091 | 4.118692 | 0.03747 | 0.995343 | 495 |
| HC118 | 18200 | 0.97 | 902.750213 | 800.358974 | 4.127785 | 0.06039 | 0.98967  | 575 |
| HC119 | 75802 | 0.97 | 478        | 478        | 2.792944 | 0.17873 | 1        | 478 |
| HC120 | 22418 | 0.97 | 592.771459 | 614.767857 | 3.28159  | 0.10077 | 0.993666 | 436 |
| HC121 | 53173 | 0.97 | 611.079606 | 641.25     | 2.773852 | 0.18982 | 0.997311 | 446 |
| HC122 | 42420 | 0.97 | 876.22236  | 791.625    | 3.730377 | 0.06389 | 0.995851 | 551 |
| HC123 | 43259 | 0.97 | 614.195885 | 634.660377 | 3.084634 | 0.12733 | 0.996879 | 464 |
| HC124 | 33647 | 0.97 | 781.284426 | 684.188679 | 3.572698 | 0.08354 | 0.995393 | 459 |
| HC125 | 27994 | 0.97 | 611.14907  | 589.692308 | 1.988812 | 0.39012 | 0.995285 | 368 |
| HC116 | 36808 | 0.97 | 559.066663 | 532.513889 | 3.354083 | 0.07687 | 0.996686 | 430 |
| HC057 | 42115 | 0.97 | 568.282879 | 497.818182 | 2.479848 | 0.208   | 0.997317 | 354 |
| HC021 | 30432 | 0.97 | 668.475913 | 693.508475 | 3.52997  | 0.09301 | 0.995005 | 499 |
| HC055 | 20420 | 0.97 | 745.593163 | 650.258621 | 3.817692 | 0.05865 | 0.992605 | 455 |
| HC025 | 33465 | 0.97 | 672.801359 | 617        | 3.281345 | 0.09607 | 0.995936 | 413 |
| HC024 | 61446 | 0.97 | 458        | 458        | 3.234358 | 0.12558 | 1        | 458 |
| HC023 | 28579 | 0.97 | 736.383871 | 617.411765 | 3.346961 | 0.0931  | 0.994961 | 466 |
| HC022 | 28586 | 0.97 | 668.853227 | 581.882353 | 3.797732 | 0.04934 | 0.995487 | 420 |
| HC149 | 30315 | 0.97 | 704.417891 | 611.842105 | 2.595275 | 0.21645 | 0.995118 | 421 |

|       |        |      |            |            |          |         |          |     |
|-------|--------|------|------------|------------|----------|---------|----------|-----|
| HC020 | 35482  | 0.97 | 458.801237 | 450.446809 | 3.259286 | 0.08483 | 0.997153 | 343 |
| HC019 | 33173  | 0.97 | 380.333122 | 390.181818 | 3.333152 | 0.06321 | 0.997438 | 282 |
| HC018 | 38082  | 0.97 | 592.057338 | 596.762712 | 3.773079 | 0.04697 | 0.996639 | 459 |
| HC017 | 28225  | 0.97 | 776.194457 | 775.328947 | 4.029211 | 0.04407 | 0.9938   | 575 |
| HC016 | 26669  | 0.97 | 706.273611 | 628.92     | 3.54968  | 0.06282 | 0.9946   | 423 |
| HC015 | 31939  | 0.97 | 863.677727 | 744.72973  | 3.793979 | 0.05315 | 0.994615 | 546 |
| HC014 | 24878  | 0.97 | 623.722245 | 562        | 3.692692 | 0.05039 | 0.994815 | 370 |
| HC013 | 39888  | 0.97 | 610.908792 | 613        | 3.676346 | 0.05408 | 0.996365 | 439 |
| HC012 | 40096  | 0.97 | 642.356632 | 702.06383  | 3.537998 | 0.06805 | 0.996409 | 483 |
| HC011 | 38474  | 0.97 | 716.364925 | 635.018182 | 3.528041 | 0.07768 | 0.996309 | 453 |
| HC010 | 44122  | 0.97 | 620.195305 | 658.6      | 3.820292 | 0.0414  | 0.996918 | 475 |
| HC056 | 39151  | 0.97 | 912.438743 | 810.232877 | 3.651486 | 0.07034 | 0.995224 | 572 |
| HC008 | 30757  | 0.97 | 683.33879  | 681.411765 | 3.93056  | 0.03674 | 0.994765 | 492 |
| HC007 | 20741  | 0.97 | 591.536161 | 576.721311 | 3.632061 | 0.07474 | 0.993395 | 424 |
| HC006 | 28078  | 0.97 | 725.08746  | 684.12766  | 3.841266 | 0.04705 | 0.994836 | 462 |
| HC005 | 24333  | 0.97 | 592.993284 | 624.269231 | 3.84007  | 0.0608  | 0.994575 | 458 |
| HC004 | 29343  | 0.97 | 585.194138 | 607.622642 | 3.606278 | 0.06776 | 0.995467 | 442 |
| HC003 | 24987  | 0.97 | 592.731025 | 580.227273 | 3.580715 | 0.08103 | 0.994477 | 437 |
| HC002 | 29497  | 0.97 | 644.79917  | 669.105263 | 3.541393 | 0.07812 | 0.994711 | 457 |
| HC001 | 30847  | 0.97 | 815.488463 | 738.015152 | 3.852247 | 0.05323 | 0.994586 | 528 |
| HC026 | 17811  | 0.97 | 464.534716 | 467.705882 | 2.917457 | 0.15496 | 0.993768 | 348 |
| HC027 | 19807  | 0.97 | 552.793544 | 543.474576 | 3.738771 | 0.05393 | 0.993639 | 410 |
| HC009 | 50519  | 0.97 | 510.506218 | 516.269231 | 2.908715 | 0.14133 | 0.997704 | 388 |
| HC029 | 37217  | 0.97 | 931.205092 | 830.828947 | 3.814644 | 0.06797 | 0.994975 | 602 |
| HC028 | 38041  | 0.97 | 501.250855 | 548.162162 | 2.761484 | 0.19533 | 0.996977 | 371 |
| HC054 | 33849  | 0.97 | 594.043714 | 559.5      | 3.111271 | 0.11268 | 0.996425 | 378 |
| HC053 | 39799  | 0.97 | 660.542593 | 672.640625 | 4.019038 | 0.0432  | 0.996407 | 514 |
| HC052 | 41699  | 0.97 | 650.303259 | 670.416667 | 3.435517 | 0.09235 | 0.996499 | 494 |
| HC051 | 36344  | 0.97 | 707.688924 | 708.884058 | 3.623301 | 0.0698  | 0.995405 | 508 |
| HC050 | 25127  | 0.97 | 747.880517 | 645.518519 | 3.194152 | 0.16469 | 0.993951 | 433 |
| HC049 | 17018  | 0.97 | 607.27938  | 594.014286 | 3.758876 | 0.06008 | 0.991656 | 451 |
| HC048 | 80130  | 0.97 | 405        | 405        | 3.19075  | 0.08683 | 1        | 405 |
| HC047 | 24269  | 0.97 | 655.678186 | 562.571429 | 3.076738 | 0.14768 | 0.994437 | 419 |
| HC046 | 29226  | 0.97 | 860.32358  | 807.584906 | 3.625403 | 0.0726  | 0.993875 | 507 |
| HC045 | 54578  | 0.97 | 557.882362 | 534.590909 | 3.252364 | 0.10563 | 0.997911 | 437 |
| HC044 | 33703  | 0.97 | 461.408951 | 479.775    | 3.558135 | 0.05423 | 0.996974 | 351 |
| HC043 | 30354  | 0.97 | 557.138167 | 563.175439 | 3.564723 | 0.08796 | 0.99608  | 440 |
| HC150 | 72542  | 0.97 | 646        | 646        | 3.320047 | 0.10233 | 1        | 646 |
| HC041 | 31918  | 0.97 | 603.430175 | 615.125    | 3.335444 | 0.13129 | 0.995802 | 456 |
| HC030 | 46199  | 0.97 | 612.226166 | 615.803279 | 3.53534  | 0.06474 | 0.996948 | 454 |
| HC042 | 48300  | 0.97 | 476.788066 | 464.212766 | 3.40028  | 0.07125 | 0.99795  | 361 |
| HC031 | 38126  | 0.97 | 609.014722 | 612.15493  | 3.558002 | 0.06817 | 0.996721 | 503 |
| HC033 | 53735  | 0.97 | 666.452038 | 680.017241 | 3.422914 | 0.07675 | 0.997264 | 495 |
| HC034 | 34796  | 0.97 | 516.174314 | 532.615385 | 3.546455 | 0.05418 | 0.996523 | 393 |
| HC032 | 43463  | 0.97 | 745.724305 | 641        | 3.865387 | 0.0432  | 0.996687 | 485 |
| HC036 | 29252  | 0.97 | 440.874225 | 361.659574 | 3.117652 | 0.11879 | 0.997197 | 291 |
| HC037 | 26665  | 0.97 | 403.707998 | 419.837838 | 3.34611  | 0.06187 | 0.996362 | 294 |
| HC038 | 132314 | 0.97 | 884        | 884        | 3.938258 | 0.05004 | 1        | 884 |
| HC039 | 30209  | 0.97 | 772.36836  | 667.833333 | 3.993677 | 0.03918 | 0.994869 | 487 |
| HC040 | 53178  | 0.97 | 591.968456 | 562.763158 | 2.57156  | 0.17538 | 0.997762 | 378 |
| HC035 | 37024  | 0.97 | 878.264846 | 791.904762 | 3.999467 | 0.0445  | 0.9953   | 553 |
| SP10  | 12824  | 0.97 | 378.957864 | 374.073171 | 3.391083 | 0.08871 | 0.993372 | 287 |
| SP15  | 19070  | 0.97 | 695.420034 | 624.630435 | 3.986252 | 0.04254 | 0.992921 | 428 |
| SP14  | 19134  | 0.97 | 480.182481 | 464.096774 | 3.236028 | 0.1033  | 0.994983 | 317 |
| SP13  | 17081  | 0.97 | 458.546059 | 363.529412 | 3.037811 | 0.12568 | 0.994731 | 285 |
| SP12  | 10777  | 0.97 | 417.297633 | 316.371429 | 1.914073 | 0.39307 | 0.991834 | 207 |
| SP11  | 22684  | 0.97 | 629.405057 | 617.088235 | 3.825194 | 0.07332 | 0.993828 | 474 |
| SP09  | 17553  | 0.97 | 434.431284 | 438.44186  | 2.448224 | 0.31719 | 0.994246 | 321 |

|      |        |      |            |            |          |         |          |     |
|------|--------|------|------------|------------|----------|---------|----------|-----|
| SP04 | 6966   | 0.97 | 555.880983 | 436.666667 | 3.255855 | 0.14885 | 0.983491 | 291 |
| SP07 | 8688   | 0.97 | 358.283007 | 316        | 2.831988 | 0.16477 | 0.991252 | 221 |
| SP06 | 14827  | 0.97 | 294.539263 | 310.615385 | 2.682072 | 0.15507 | 0.995414 | 223 |
| SP05 | 11158  | 0.97 | 480.00733  | 502.837209 | 3.297385 | 0.10711 | 0.989156 | 334 |
| SP16 | 31364  | 0.97 | 233.579166 | 198.083333 | 1.531187 | 0.35872 | 0.998501 | 108 |
| SP03 | 7625   | 0.97 | 540.150982 | 572.82     | 4.071956 | 0.03934 | 0.98177  | 381 |
| SP02 | 23899  | 0.97 | 209.799125 | 199.666667 | 1.724688 | 0.40951 | 0.998117 | 163 |
| SP01 | 96502  | 0.97 | 137        | 137        | 1.986586 | 0.20804 | 1        | 137 |
| SP08 | 21709  | 0.97 | 248.202684 | 238.451613 | 2.514565 | 0.21551 | 0.997559 | 194 |
| SP17 | 11325  | 0.97 | 645.664095 | 547.444444 | 3.920359 | 0.05545 | 0.988168 | 406 |
| SP24 | 48270  | 0.97 | 530        | 530        | 4.129753 | 0.03986 | 1        | 530 |
| SP19 | 14178  | 0.97 | 428.905326 | 356.6      | 2.88165  | 0.10928 | 0.993511 | 237 |
| SP37 | 15736  | 0.97 | 369.212177 | 382.058824 | 3.6778   | 0.05459 | 0.995107 | 296 |
| SP36 | 56288  | 0.97 | 328        | 328        | 2.929909 | 0.10459 | 1        | 328 |
| SP35 | 126776 | 0.97 | 290        | 290        | 3.172777 | 0.0694  | 1        | 290 |
| SP34 | 88700  | 0.97 | 427        | 427        | 3.819495 | 0.04152 | 1        | 427 |
| SP33 | 130574 | 0.97 | 219        | 219        | 2.269103 | 0.24942 | 1        | 219 |
| SP32 | 63288  | 0.97 | 306        | 306        | 3.243925 | 0.07351 | 1        | 306 |
| SP30 | 111366 | 0.97 | 296        | 296        | 3.076602 | 0.10805 | 1        | 296 |
| SP18 | 18566  | 0.97 | 542.324392 | 546.882353 | 3.65028  | 0.07312 | 0.99316  | 390 |
| SP29 | 45185  | 0.97 | 328.633586 | 338.333333 | 2.273621 | 0.2821  | 0.998561 | 269 |
| SP27 | 13598  | 0.97 | 650.912797 | 543.75     | 3.206875 | 0.11375 | 0.990734 | 325 |
| SP26 | 73040  | 0.97 | 478        | 478        | 3.499865 | 0.07432 | 1        | 478 |
| SP25 | 25929  | 0.97 | 531.929133 | 528.964912 | 3.01965  | 0.1397  | 0.995179 | 393 |
| SP23 | 14164  | 0.97 | 522.286149 | 536.058824 | 3.538689 | 0.10086 | 0.99174  | 403 |
| SP22 | 7379   | 0.97 | 525.26475  | 444.848485 | 2.962875 | 0.21744 | 0.985499 | 273 |
| SP21 | 17661  | 0.97 | 365.565644 | 307.125    | 2.358741 | 0.24523 | 0.995867 | 225 |
| SP20 | 30883  | 0.97 | 493.910509 | 494.62069  | 3.504124 | 0.07411 | 0.996891 | 416 |
| SP28 | 8054   | 0.97 | 496.924517 | 506.06     | 3.467649 | 0.13894 | 0.984728 | 356 |
| SP31 | 34219  | 0.97 | 250.247569 | 247.535714 | 2.678536 | 0.15236 | 0.99851  | 202 |

**The abundance and composition at the genus level of each sample among CP (n=72), SP (n=37), and HC (n=150) groups.**

| ID                                   | CP41     | CP34     | CP04     | CP66     | CP69     | CP70     | CP02     | CP25     | CP49     | CP71     | CP60     |
|--------------------------------------|----------|----------|----------|----------|----------|----------|----------|----------|----------|----------|----------|
| Prevotella                           | 0.964604 | 0.893372 | 0.88895  | 0.820512 | 0.662513 | 0.656041 | 0.62592  | 0.554053 | 0.553898 | 0.550539 | 0.50513  |
| Neisseria                            | 8.70E-05 | 5.27E-04 | 8.45E-04 | 7.54E-04 | 0.001085 | 6.39E-04 | 0.001678 | 0.087394 | 8.47E-04 | 0.005594 | 0.001362 |
| Veillonella                          | 0.018557 | 0.010803 | 0.001405 | 0.028469 | 0.207627 | 0.033693 | 0.111726 | 0.103451 | 0.163875 | 0.258732 | 0.37555  |
| Streptococcus                        | 6.12E-04 | 0.001059 | 4.84E-04 | 0.009307 | 0.002164 | 0.010781 | 0.004072 | 0.050635 | 0.015802 | 0.012025 | 0.04522  |
| Porphyromonas                        | 2.34E-04 | 2.90E-05 | 1.92E-04 | 6.87E-04 | 1.90E-04 | 5.09E-04 | 4.08E-04 | 0.00165  | 0.004711 | 4.69E-04 | 0        |
| Leptotrichia                         | 0.001402 | 2.86E-04 | 0.085761 | 8.50E-04 | 0.015408 | 0.197609 | 0.00567  | 0.007513 | 0.028993 | 0.012615 | 4.11E-04 |
| Rothia                               | 7.70E-05 | 5.64E-04 | 0        | 0.004066 | 0.001097 | 0.001197 | 0.087741 | 0.020548 | 0.009985 | 0.01328  | 0.015084 |
| Actinomyces                          | 0.007883 | 0.080275 | 2.00E-04 | 0.082821 | 0.042683 | 8.53E-04 | 0.016839 | 0.089495 | 0.087478 | 0.076405 | 0.006402 |
| Fusobacterium                        | 0        | 0        | 3.17E-04 | 2.94E-04 | 0.00526  | 0.001037 | 0.001939 | 0.002123 | 1.91E-04 | 0.005332 | 2.43E-04 |
| Haemophilus                          | 0        | 5.80E-05 | 1.09E-04 | 2.24E-04 | 1.85E-04 | 1.40E-05 | 0        | 9.35E-04 | 0.007386 | 1.75E-04 | 1.80E-04 |
| Granulicatella                       | 7.40E-05 | 2.35E-04 | 0        | 8.84E-04 | 0        | 3.00E-05 | 0.003383 | 7.12E-04 | 8.73E-04 | 0.001141 | 0.001221 |
| Bacteria_unclassified                | 4.64E-04 | 6.56E-04 | 1.18E-04 | 0.002534 | 0.002995 | 9.90E-05 | 0.00545  | 0.024143 | 0.001366 | 0.00203  | 0.005325 |
| Lachnoanaerobaculum                  | 4.98E-04 | 2.50E-04 | 5.00E-05 | 0.001002 | 0        | 7.47E-04 | 0.090186 | 0.005044 | 0.025092 | 6.87E-04 | 3.25E-04 |
| Halomonas                            | 0        | 0        | 0        | 1.01E-04 | 0        | 0.004991 | 0        | 0        | 0.001683 | 2.93E-04 | 6.60E-05 |
| Peptostreptococcus                   | 0        | 6.80E-05 | 0.02012  | 4.43E-04 | 0.001728 | 0.043055 | 0.001341 | 0        | 0.002306 | 0.014398 | 6.80E-05 |
| Candidate_division_TM7_norank        | 0        | 2.50E-04 | 0        | 0.005953 | 2.93E-04 | 1.36E-04 | 7.80E-05 | 0.005703 | 0.01742  | 0.005279 | 0        |
| Family_XIII_incertae_sedis           | 5.86E-04 | 0.00186  | 0        | 0.002667 | 0.011357 | 6.30E-05 | 0.003893 | 0.004279 | 0.004097 | 0.003474 | 0.00125  |
| Oribacterium                         | 0        | 0        | 1.47E-04 | 2.50E-05 | 2.00E-04 | 7.10E-05 | 0.006073 | 0.00415  | 3.00E-04 | 9.42E-04 | 6.00E-05 |
| Actinobacteria_unclassified          | 7.50E-05 | 0.001345 | 0        | 0.00307  | 0.001493 | 0        | 0.010074 | 0.013088 | 0.001416 | 0.002339 | 0.001608 |
| Gemella                              | 0        | 0        | 1.42E-04 | 0        | 2.76E-04 | 0.003482 | 0        | 0.001147 | 8.91E-04 | 4.30E-05 | 3.19E-04 |
| Solobacterium                        | 0        | 0        | 5.20E-05 | 2.55E-04 | 0.001138 | 1.50E-05 | 3.01E-04 | 0.001025 | 0.001371 | 0.003535 | 6.70E-05 |
| Capnocytophaga                       | 0        | 2.50E-05 | 0        | 9.28E-04 | 0.001174 | 6.31E-04 | 0        | 0        | 0.004974 | 6.53E-04 | 4.83E-04 |
| Firmicutes_unclassified              | 0        | 6.10E-05 | 4.40E-05 | 9.41E-04 | 0.001186 | 2.33E-04 | 0.012115 | 0.005041 | 5.81E-04 | 0.001068 | 0.012861 |
| Citrobacter                          | 0        | 0        | 0        | 0        | 0        | 0        | 0        | 0        | 0        | 0        | 0        |
| Stomatobaculum                       | 0        | 0        | 4.90E-05 | 0.001207 | 0        | 1.55E-04 | 0        | 0.00465  | 1.08E-04 | 0.004157 | 0        |
| Pasteurellaceae_unclassified         | 0        | 0        | 0        | 0        | 0        | 0        | 0        | 8.49E-04 | 2.40E-05 | 1.70E-05 | 0        |
| Lactobacillales_unclassified         | 0        | 2.70E-05 | 0        | 3.70E-05 | 0        | 0        | 9.34E-04 | 4.01E-04 | 3.70E-05 | 4.90E-05 | 8.79E-04 |
| Alloprevotella                       | 1.56E-04 | 0.001712 | 5.80E-05 | 0.005188 | 8.34E-04 | 0.014263 | 0.001888 | 0.001328 | 0.013371 | 0.001799 | 1.18E-04 |
| Atopobium                            | 0        | 0.001895 | 6.37E-04 | 0.008529 | 0.001719 | 0.009441 | 0.001108 | 0.003066 | 0.009158 | 0.003544 | 0.003791 |
| Megasphaera                          | 0.003207 | 0.003653 | 4.90E-05 | 0.009352 | 0.03246  | 0        | 0.004055 | 0.003793 | 0.028601 | 0.01097  | 0.015221 |
| Candidate_division_SR1_norank        | 0        | 0        | 0        | 0        | 1.02E-04 | 0        | 0        | 0        | 0.001607 | 0        | 0        |
| Proteobacteria_unclassified          | 0        | 0        | 0        | 0        | 0        | 0        | 0        | 8.20E-05 | 0        | 0        | 0        |
| Corynebacterium                      | 0        | 6.10E-05 | 0        | 0.004744 | 0        | 0        | 0        | 4.99E-04 | 0        | 0.00324  | 0        |
| Selenomonas                          | 4.13E-04 | 3.10E-05 | 0        | 6.47E-04 | 0.001237 | 1.51E-04 | 6.83E-04 | 3.09E-04 | 4.90E-05 | 1.74E-04 | 0.002243 |
| Parvimonas                           | 0        | 0        | 0        | 0        | 0        | 1.50E-05 | 0        | 0        | 2.60E-05 | 8.03E-04 | 0        |
| Campylobacter                        | 1.82E-04 | 9.80E-05 | 5.20E-05 | 5.09E-04 | 9.40E-05 | 0.003525 | 1.46E-04 | 1.61E-04 | 0.002083 | 5.99E-04 | 3.94E-04 |
| Tannerella                           | 0        | 0        | 1.12E-04 | 5.90E-05 | 0.001286 | 0.009283 | 0        | 0        | 0.002339 | 0.001195 | 0        |
| Lautropia                            | 8.90E-05 | 0        | 0        | 0        | 0        | 1.71E-04 | 0        | 0        | 9.60E-05 | 0        | 0        |
| Ruminococcaceae_uncultured           | 0        | 0        | 0        | 0        | 0        | 3.00E-05 | 7.10E-05 | 1.70E-04 | 2.56E-04 | 0        | 0        |
| Lachnospiraceae_uncultured           | 0        | 0        | 5.60E-05 | 3.50E-05 | 0        | 3.20E-05 | 0        | 0        | 1.03E-04 | 2.00E-05 | 0        |
| Bacilli_unclassified                 | 0        | 0        | 0        | 0        | 0        | 2.10E-05 | 3.84E-04 | 7.12E-04 | 6.80E-05 | 1.90E-05 | 5.60E-04 |
| Pelagibacterium                      | 0        | 0        | 0        | 0        | 0        | 5.73E-04 | 0        | 0        | 1.02E-04 | 1.30E-05 | 6.00E-05 |
| PSD1-392_norank                      | 0        | 0        | 0        | 3.40E-05 | 0        | 0        | 0        | 5.56E-04 | 0        | 2.60E-05 | 0.001299 |
| Xanthomonadaceae_uncultured          | 0        | 0        | 0        | 0        | 0        | 4.57E-04 | 0        | 0        | 1.41E-04 | 0        | 0        |
| Shuttleworthia                       | 0        | 0        | 0        | 0        | 0        | 0        | 0        | 0        | 0        | 0        | 0        |
| Neisseriaceae_unclassified           | 0        | 0        | 0        | 0        | 0        | 0        | 0        | 2.30E-04 | 0        | 0        | 0        |
| Phyllobacteriaceae_unclassified      | 0        | 0        | 0        | 0        | 0        | 4.08E-04 | 0        | 0        | 3.50E-05 | 2.00E-05 | 0        |
| Family_XIII_uncultured               | 0        | 0        | 0        | 0        | 0        | 0        | 0        | 0        | 0        | 0        | 0        |
| Lactobacillus                        | 0        | 0        | 0        | 2.30E-05 | 0        | 0        | 0        | 0        | 3.60E-05 | 0        | 0        |
| Clostridiales_unclassified           | 0        | 6.30E-05 | 0        | 0        | 0.001282 | 0        | 0        | 0        | 2.50E-05 | 1.37E-04 | 0        |
| Abiotrophia                          | 0        | 0        | 0        | 4.10E-05 | 0        | 0        | 0        | 0        | 2.90E-04 | 0        | 0        |
| Peptostreptococcaceae_incertae_sedis | 0        | 0        | 0        | 0        | 9.90E-05 | 1.10E-05 | 0        | 0        | 6.40E-05 | 3.90E-05 | 0        |
| Dialister                            | 0        | 6.30E-04 | 0        | 0.001544 | 0        | 0        | 0        | 0        | 1.15E-04 | 2.30E-05 | 5.80E-05 |
| Kingella                             | 0        | 0        | 0        | 0        | 0        | 0        | 0        | 0        | 0        | 0        | 0        |
| Moraxella                            | 0        | 0        | 0        | 0        | 0        | 0        | 0        | 0        | 0        | 0        | 0        |
| Olsenella                            | 0        | 0        | 0        | 0        | 0        | 0        | 0        | 0        | 8.80E-05 | 0        | 1.05E-04 |
| Others                               | 8.00E-04 | 1.07E-04 | 5.10E-05 | 0.001264 | 8.35E-04 | 0.005538 | 0.001844 | 0.001065 | 0.005642 | 0.002108 | 0.002037 |

| CP45     | CP43     | CP40     | CP32     | CP15     | CP55     | CP50     | CP20     | CP28     | CP64     | CP31     | CP03     | CP57     | CP33     | CP36     |
|----------|----------|----------|----------|----------|----------|----------|----------|----------|----------|----------|----------|----------|----------|----------|
| 0.376425 | 0.351445 | 0.349048 | 0.336191 | 0.331075 | 0.330386 | 0.310502 | 0.308872 | 0.306465 | 0.305265 | 0.300648 | 0.243171 | 0.240362 | 0.235702 | 0.227006 |
| 0.025628 | 0.002402 | 2.54E-04 | 0.394477 | 0.01965  | 0.07474  | 6.28E-04 | 0.011514 | 0.015446 | 0.058892 | 0.080043 | 0.001283 | 0.455863 | 0.025355 | 0.001966 |
| 0.095437 | 0.259446 | 0.192567 | 0.032066 | 0.273999 | 0.154738 | 0.257529 | 0.118958 | 0.105923 | 0.062511 | 0.17079  | 0.309301 | 0.152148 | 0.208099 | 0.280929 |
| 0.091694 | 0.010416 | 0.159482 | 0.004261 | 0.002948 | 0.16222  | 0.021148 | 0.068553 | 7.07E-04 | 0.033655 | 0.031474 | 0.075433 | 0.009733 | 0.006467 | 0.028919 |
| 0.003707 | 3.70E-04 | 1.73E-04 | 0.002182 | 6.75E-04 | 0.019632 | 0        | 0.001659 | 8.60E-05 | 0.046678 | 9.75E-04 | 4.66E-04 | 6.54E-04 | 0.005848 | 2.84E-04 |
| 0.212246 | 0.132994 | 0.019967 | 0.145019 | 0.076548 | 0.031641 | 0.002879 | 0.364547 | 0.509286 | 0.024062 | 0.31451  | 0.098351 | 0.015131 | 0.006859 | 0.08979  |
| 0.001059 | 0.011672 | 0.042953 | 0.002949 | 7.83E-04 | 0.007273 | 0.024676 | 0.002662 | 2.35E-04 | 0.051848 | 0.002956 | 0.015491 | 0.012576 | 0.046791 | 9.70E-04 |
| 0.003915 | 0.150321 | 0.1414   | 0.010264 | 0.024952 | 0.056971 | 0.273924 | 0.004143 | 0.021119 | 0.01449  | 0.024201 | 0.05282  | 0.049316 | 0.392843 | 0.255541 |
| 0.017146 | 1.25E-04 | 1.89E-04 | 0.004136 | 0.075938 | 0.02769  | 4.80E-05 | 0.010153 | 0.004671 | 0.081731 | 0.002201 | 6.29E-04 | 0.009008 | 4.41E-04 | 0.006187 |
| 0.001138 | 1.38E-04 | 1.22E-04 | 8.97E-04 | 0.001051 | 0.012484 | 3.00E-05 | 8.33E-04 | 3.11E-04 | 0.006546 | 7.08E-04 | 3.34E-04 | 9.10E-04 | 0.003247 | 0.001067 |
| 0.003148 | 0.003384 | 0.004522 | 0.001466 | 6.50E-04 | 0.001638 | 0.055166 | 9.07E-04 | 2.57E-04 | 0.012922 | 0.001274 | 0.051848 | 1.30E-04 | 5.64E-04 | 0.002368 |
| 0.006486 | 0.009078 | 0.008688 | 0.011595 | 0.017836 | 0.020026 | 0.003405 | 0.001893 | 0.003431 | 0.001977 | 0.012402 | 0.00228  | 0.019487 | 0.010763 | 0.007661 |
| 0.044917 | 0.006353 | 0.003176 | 0.006496 | 0.05232  | 0.019788 | 3.70E-05 | 0.031647 | 7.07E-04 | 0.021051 | 0.010299 | 0.010294 | 0.002569 | 0.002972 | 0.00758  |
| 1.94E-04 | 0        | 2.79E-04 | 1.41E-04 | 0        | 6.30E-05 | 0.002125 | 0        | 0        | 0        | 0        | 0.002607 | 0        | 0        | 2.74E-04 |
| 0.018376 | 0        | 0.001456 | 7.32E-04 | 0.002505 | 0.001948 | 3.90E-05 | 3.92E-04 | 2.39E-04 | 0.026934 | 4.24E-04 | 6.82E-04 | 0.001025 | 1.32E-04 | 0.005359 |
| 0.002671 | 0.001702 | 5.40E-05 | 6.04E-04 | 0.002    | 0.003846 | 0        | 0.010057 | 6.00E-04 | 0.143454 | 7.10E-05 | 0.011442 | 0.00127  | 5.09E-04 | 0.001348 |
| 0.008256 | 3.94E-04 | 0.001499 | 0.00191  | 0.004688 | 0.002547 | 3.70E-05 | 0.001251 | 0.001762 | 0.004573 | 0.002276 | 5.80E-05 | 5.19E-04 | 4.63E-04 | 0.00628  |
| 0.005595 | 5.09E-04 | 0.009574 | 0.004449 | 0.005696 | 0.00302  | 0        | 0.005865 | 7.04E-04 | 0.010018 | 0.002565 | 0.026175 | 0.003372 | 3.06E-04 | 0.013256 |
| 1.80E-05 | 0.010501 | 0.012262 | 0.001155 | 1.29E-04 | 0.002591 | 0.004862 | 6.30E-05 | 4.86E-04 | 7.62E-04 | 0.00112  | 0.001488 | 0.006201 | 0.038176 | 0.001021 |
| 0.002858 | 2.63E-04 | 0.015232 | 1.44E-04 | 0.001887 | 8.54E-04 | 0.001891 | 0.001304 | 1.46E-04 | 0.003714 | 3.61E-04 | 0.003668 | 0        | 2.22E-04 | 0.003744 |
| 0.005286 | 1.37E-04 | 9.44E-04 | 0.001184 | 0.009888 | 0.009936 | 7.01E-04 | 0.001795 | 4.00E-04 | 0.012739 | 8.90E-04 | 0.001051 | 0.001434 | 0.001606 | 0.005121 |
| 1.04E-04 | 0        | 1.34E-04 | 0        | 2.82E-04 | 5.34E-04 | 0        | 3.41E-04 | 1.45E-04 | 0.032868 | 2.20E-04 | 9.37E-04 | 2.64E-04 | 4.90E-05 | 8.70E-05 |
| 0.008739 | 0.008004 | 0.006154 | 0.001159 | 0.00967  | 0.007767 | 0.013796 | 0.001048 | 0.001478 | 4.51E-04 | 0.005495 | 0.007613 | 0.001869 | 0.001302 | 0.003731 |
| 0        | 0        | 0        | 0        | 0        | 0        | 0        | 0        | 0        | 0        | 0        | 0        | 0        | 0        | 0        |
| 0.009493 | 0        | 0.003983 | 0.002313 | 0.036908 | 0.005771 | 0        | 0.00423  | 0.001828 | 0.001607 | 0.002417 | 0.021599 | 2.50E-04 | 9.90E-05 | 0.003051 |
| 2.83E-04 | 0        | 0        | 4.17E-04 | 1.39E-04 | 0.001724 | 0        | 4.10E-05 | 0        | 4.13E-04 | 2.08E-04 | 4.30E-05 | 2.46E-04 | 6.59E-04 | 1.49E-04 |
| 0.001131 | 5.46E-04 | 0.002725 | 4.22E-04 | 1.38E-04 | 0.005668 | 0.003655 | 1.24E-04 | 0        | 9.31E-04 | 6.86E-04 | 0.003543 | 2.55E-04 | 9.60E-05 | 6.89E-04 |
| 0.002967 | 0.001028 | 6.40E-05 | 0.0097   | 0.002625 | 0.008815 | 4.30E-05 | 0.005043 | 0.002214 | 0.010777 | 2.26E-04 | 0.007771 | 0.001279 | 9.30E-05 | 1.99E-04 |
| 5.68E-04 | 4.98E-04 | 0.002578 | 2.85E-04 | 0.001158 | 0.001192 | 0.01355  | 4.80E-05 | 4.90E-04 | 0.010526 | 4.28E-04 | 0.014933 | 5.10E-04 | 0.001517 | 0.007067 |
| 9.90E-05 | 0.027286 | 0.006045 | 0.002339 | 0.007097 | 0.011089 | 1.51E-04 | 0.001849 | 0.01791  | 0.002349 | 0.0067   | 0.019714 | 0.007871 | 0.004527 | 0.010892 |
| 0        | 0        | 0        | 0        | 0.02307  | 2.99E-04 | 0        | 1.79E-04 | 0        | 3.30E-05 | 7.40E-05 | 1.70E-05 | 6.30E-04 | 0        | 0        |
| 9.40E-05 | 0        | 0        | 0.00133  | 1.39E-04 | 0.0015   | 0        | 0        | 0        | 0        | 9.50E-04 | 0        | 9.05E-04 | 2.35E-04 | 0        |
| 0        | 0        | 0        | 2.74E-04 | 0        | 4.88E-04 | 0        | 0.001596 | 0        | 1.03E-04 | 0        | 0        | 0        | 0        | 0        |
| 0.022963 | 0.006863 | 0.004836 | 0.006546 | 0.001578 | 0        | 0        | 0.007029 | 2.34E-04 | 0.001686 | 0.010165 | 0.001156 | 0.0013   | 0.002101 | 0.013048 |
| 0.001467 | 0        | 6.80E-05 | 0        | 0        | 7.45E-04 | 0        | 8.90E-05 | 0        | 7.40E-05 | 0        | 0        | 0        | 0        | 1.51E-04 |
| 2.70E-05 | 0        | 6.33E-04 | 8.60E-04 | 5.55E-04 | 0        | 3.88E-04 | 0.007422 | 3.87E-04 | 0.003221 | 7.78E-04 | 0.00268  | 0        | 4.80E-05 | 7.77E-04 |
| 0        | 1.32E-04 | 5.80E-05 | 0        | 1.29E-04 | 0.001371 | 0        | 8.18E-04 | 0        | 1.57E-04 | 0.001666 | 1.60E-05 | 0        | 0        | 0        |
| 0        | 0        | 6.60E-05 | 0        | 0        | 6.60E-05 | 0.001515 | 9.70E-05 | 0        | 1.63E-04 | 0        | 0        | 1.28E-04 | 0        | 9.53E-04 |
| 4.90E-05 | 0        | 0        | 1.35E-04 | 0.001704 | 0.003235 | 1.22E-04 | 0.00848  | 0        | 4.75E-04 | 6.50E-04 | 6.55E-04 | 2.45E-04 | 5.10E-05 | 0.00123  |
| 0.013243 | 0        | 0        | 0.00574  | 0.001986 | 1.43E-04 | 3.10E-05 | 0.007067 | 0        | 0.003425 | 0.002993 | 0        | 0        | 0        | 0.001141 |
| 0.001178 | 3.73E-04 | 0.00301  | 0        | 5.11E-04 | 2.72E-04 | 3.54E-04 | 1.89E-04 | 7.70E-05 | 1.31E-04 | 1.71E-04 | 9.42E-04 | 0        | 2.09E-04 | 0.001066 |
| 0        | 0        | 0        | 0        | 0        | 0        | 3.17E-04 | 0        | 0        | 0        | 0        | 1.48E-04 | 0        | 0        | 9.50E-05 |
| 4.70E-04 | 3.89E-04 | 6.74E-04 | 1.56E-04 | 0        | 3.48E-04 | 5.24E-04 | 0        | 0        | 2.70E-05 | 1.40E-04 | 0.00135  | 0        | 0        | 1.03E-04 |
| 0        | 0        | 7.40E-05 | 0        | 0        | 0        | 9.80E-05 | 0        | 0        | 0        | 7.00E-05 | 1.20E-04 | 0        | 0        | 1.39E-04 |
| 9.19E-04 | 0        | 0.001594 | 9.00E-04 | 0.001484 | 6.90E-05 | 0        | 2.04E-04 | 0        | 0        | 0        | 0.002471 | 0        | 0        | 8.05E-04 |
| 7.10E-05 | 0        | 0        | 7.32E-04 | 1.25E-04 | 2.85E-04 | 0        | 0        | 0        | 6.30E-05 | 0.001964 | 1.00E-05 | 2.55E-04 | 8.30E-05 | 0        |
| 0        | 0        | 5.50E-05 | 0        | 0        | 0        | 1.78E-04 | 0        | 0        | 0        | 0        | 1.19E-04 | 0        | 0        | 0        |
| 0.001044 | 0        | 0        | 0        | 1.26E-04 | 6.70E-05 | 0        | 0        | 0        | 0        | 6.50E-05 | 0        | 0        | 0        | 1.87E-04 |
| 0        | 0        | 0        | 0        | 0        | 0        | 0        | 0        | 0        | 5.20E-05 | 0        | 0        | 0        | 0        | 0        |
| 0.001054 | 0        | 0        | 1.50E-04 | 5.15E-04 | 7.20E-05 | 0        | 5.10E-05 | 8.40E-05 | 0        | 0        | 0        | 0        | 0        | 9.40E-05 |
| 0        | 0        | 0        | 0        | 0        | 7.40E-05 | 2.25E-04 | 0        | 0        | 0.001066 | 0        | 0        | 0        | 4.60E-05 | 0        |
| 1.24E-04 | 0        | 0        | 0        | 1.37E-04 | 0        | 0        | 0        | 0        | 3.40E-04 | 0        | 0        | 0        | 1.06E-04 | 0        |
| 0        | 0.001824 | 1.17E-04 | 1.38E-04 | 0.001351 | 3.41E-04 | 3.60E-05 | 4.07E-04 | 2.44E-04 | 0        | 6.00E-05 | 3.62E-04 | 0.001009 | 0        | 6.44E-04 |
| 0        | 0        | 0        | 0        | 0        | 2.13E-04 | 0        | 0        | 0        | 3.60E-05 | 0        | 3.90E-05 | 0        | 0        | 0        |
| 0        | 0        | 0        | 0        | 0        | 0        | 0        | 3.70E-05 | 0        | 0        | 0        | 0        | 0        | 0        | 0        |
| 0        | 0        | 0        | 0        | 0        | 0        | 0        | 0        | 0        | 0        | 0        | 9.90E-05 | 0        | 0        | 0        |
| 0.007713 | 0.001407 | 0.003291 | 0.004086 | 0.003355 | 0.00382  | 0.00539  | 0.006543 | 0.001928 | 0.005204 | 0.003686 | 0.004791 | 0.001276 | 0.001414 | 0.007031 |

| CP09     | CP14     | CP11     | CP27     | CP53     | CP62     | CP16     | CP30     | CP17     | CP26     | CP48     | CP35     | CP52     | CP67     | CP37     |
|----------|----------|----------|----------|----------|----------|----------|----------|----------|----------|----------|----------|----------|----------|----------|
| 0.203374 | 0.199218 | 0.178377 | 0.160133 | 0.152678 | 0.144195 | 0.13732  | 0.134483 | 0.104195 | 0.100825 | 0.098093 | 0.096209 | 0.095134 | 0.093937 | 0.084358 |
| 0.115168 | 0.083892 | 0.117656 | 0.243302 | 0.367488 | 0.2216   | 0.180118 | 0.145747 | 0.023559 | 0.2143   | 0.140262 | 7.37E-04 | 0.005611 | 0.093364 | 1.73E-04 |
| 0.097794 | 0.093262 | 0.128078 | 0.174633 | 0.067238 | 0.092678 | 0.232746 | 0.081735 | 0.037611 | 0.308437 | 0.07666  | 0.551578 | 0.103321 | 0.266841 | 0.154258 |
| 0.043517 | 0.081636 | 0.079217 | 0.010766 | 0.027461 | 0.052395 | 0.019311 | 0.270862 | 0.011598 | 0.155635 | 0.006984 | 0.007825 | 0.111187 | 0.095008 | 0.400697 |
| 2.35E-04 | 0.012903 | 0.023663 | 0.021848 | 0.11163  | 0.049365 | 0.001108 | 0.016517 | 0.005567 | 0.004374 | 0.001244 | 0.174174 | 0.00437  | 0.0713   | 0        |
| 0.277794 | 0.036282 | 0.014657 | 0.110427 | 0.023001 | 0.103622 | 0.241701 | 0.016726 | 0.629861 | 0.007714 | 0.528556 | 2.03E-04 | 0.490105 | 0.027343 | 0.002157 |
| 0.085923 | 0.006199 | 0.194546 | 0.006995 | 0.044582 | 0.090402 | 0.014631 | 0.049424 | 0.017735 | 0.057737 | 0.006777 | 0.016438 | 0.028609 | 0.089841 | 0.169617 |
| 0.069591 | 0.087945 | 0.055    | 0.134697 | 7.09E-04 | 0.013187 | 0.049657 | 0.021604 | 0.046084 | 0.028837 | 0.077178 | 0.047085 | 5.51E-04 | 0.002701 | 0.001277 |
| 0.001809 | 0.183858 | 0.018491 | 0.034427 | 0.087079 | 0.036577 | 0.024601 | 0.022906 | 0.05117  | 9.20E-04 | 0.003259 | 3.67E-04 | 0.028768 | 0.021191 | 0        |
| 0.005487 | 0.001263 | 0.007208 | 0.011339 | 0.011749 | 0.005449 | 5.33E-04 | 1.21E-04 | 5.12E-04 | 0.002369 | 6.72E-04 | 2.49E-04 | 0.001133 | 0.011135 | 0.031102 |
| 0.007674 | 0.006641 | 0.005506 | 0.003856 | 0.00461  | 0.019448 | 0.001957 | 0.060747 | 0.00332  | 0.024619 | 0.004275 | 1.85E-04 | 0.026707 | 0.099473 | 0.013245 |
| 0.00532  | 0.00954  | 0.015643 | 0.027051 | 0.007079 | 0.004174 | 0.012446 | 5.48E-04 | 0.010051 | 0.006836 | 0.008626 | 9.28E-04 | 4.53E-04 | 3.30E-05 | 0.008526 |
| 0.012134 | 0.022671 | 0.017579 | 0.012239 | 0.015907 | 0.017905 | 0.009243 | 0.008538 | 0.009035 | 0.011204 | 0.001027 | 7.40E-05 | 0.023407 | 0.001422 | 0.001901 |
| 0.002466 | 0        | 1.88E-04 | 0        | 1.50E-05 | 6.00E-05 | 0        | 0.016495 | 6.50E-05 | 0        | 1.72E-04 | 0.00696  | 0        | 0.023093 | 5.24E-04 |
| 1.25E-04 | 0.001173 | 0.015726 | 4.30E-04 | 0.004737 | 0.004591 | 5.72E-04 | 0.012609 | 0.003075 | 0.006636 | 8.58E-04 | 0        | 0.002557 | 0.003755 | 0.013344 |
| 0.002066 | 0.024058 | 0.001497 | 0.00468  | 0.011908 | 0.055916 | 0.012882 | 0.055648 | 0.002347 | 0.007489 | 7.02E-04 | 1.03E-04 | 0.026032 | 1.08E-04 | 0        |
| 2.77E-04 | 0.001061 | 0.001299 | 0.004536 | 0.002518 | 0.002411 | 0.003036 | 0.007764 | 0.004353 | 0.005555 | 0.001439 | 2.40E-05 | 0.001157 | 6.60E-05 | 0        |
| 0.003022 | 0.015009 | 0.005472 | 0.001979 | 0.00483  | 0.007764 | 0.003553 | 0.012809 | 0.00314  | 0.018613 | 0.001293 | 2.30E-05 | 0.005117 | 1.46E-04 | 2.58E-04 |
| 0.009288 | 0.008324 | 0.013512 | 0.007547 | 4.61E-04 | 0.00209  | 0.005527 | 1.13E-04 | 0.007127 | 0.002568 | 0.003644 | 3.06E-04 | 2.70E-05 | 0        | 5.80E-04 |
| 0.002093 | 0.003795 | 0.010446 | 3.19E-04 | 7.50E-04 | 0.001498 | 5.10E-04 | 0.017063 | 0.00201  | 0.003037 | 9.28E-04 | 1.91E-04 | 0.00264  | 5.10E-04 | 0.064202 |
| 0.002026 | 0.023438 | 0.029675 | 5.45E-04 | 0.002479 | 0.006864 | 0.003595 | 0.010092 | 0.001393 | 0.007051 | 7.87E-04 | 3.90E-05 | 0.003074 | 0.006947 | 0.001619 |
| 3.42E-04 | 0.045609 | 5.24E-04 | 1.80E-04 | 0.007182 | 0.00272  | 4.99E-04 | 0.00146  | 1.94E-04 | 8.70E-05 | 0        | 5.60E-05 | 1.21E-04 | 0.004501 | 0        |
| 0.001458 | 0.00118  | 0.004899 | 0.005728 | 5.69E-04 | 0.00104  | 0.003903 | 3.59E-04 | 0.002016 | 0.004682 | 0.003324 | 0        | 2.50E-04 | 0        | 0.013026 |
| 0        | 0        | 0        | 0        | 0        | 0        | 0        | 0        | 0        | 0        | 0        | 0        | 0        | 1.90E-05 | 0        |
| 0.004092 | 0.001307 | 0.042084 | 0.003539 | 0.004531 | 0.003717 | 0.003211 | 3.36E-04 | 0.003948 | 0.004209 | 0.001014 | 0        | 0.007206 | 6.97E-04 | 0.002677 |
| 0.001393 | 1.18E-04 | 0.001589 | 0.002629 | 0.001093 | 3.75E-04 | 2.19E-04 | 0        | 3.33E-04 | 1.03E-04 | 5.22E-04 | 0        | 0        | 0        | 0        |
| 0.001263 | 8.48E-04 | 0.00185  | 8.74E-04 | 3.35E-04 | 0.001275 | 3.83E-04 | 0.002043 | 7.62E-04 | 0.002688 | 6.55E-04 | 0        | 4.52E-04 | 2.31E-04 | 0.008164 |
| 2.01E-04 | 0.002469 | 3.85E-04 | 0.001144 | 0.011014 | 0.001367 | 0.005014 | 0.003217 | 7.50E-04 | 0.001268 | 1.93E-04 | 6.80E-05 | 1.80E-04 | 0.002815 | 0        |
| 0.009709 | 1.49E-04 | 0.001828 | 2.92E-04 | 2.22E-04 | 0.003848 | 9.22E-04 | 0.004235 | 2.90E-04 | 9.57E-04 | 2.03E-04 | 0        | 1.94E-04 | 0.002506 | 2.98E-04 |
| 0.003669 | 0.003056 | 3.50E-05 | 0.003193 | 0.001454 | 0.005475 | 0.010593 | 0.00144  | 8.55E-04 | 0.00314  | 0.00143  | 0.002795 | 0.01697  | 0.006595 | 6.56E-04 |
| 0        | 0.006124 | 0        | 0        | 0.001276 | 0.001525 | 0        | 0        | 2.78E-04 | 0        | 0        | 0        | 0        | 0        | 0        |
| 0        | 3.50E-05 | 7.79E-04 | 0.004476 | 8.18E-04 | 0        | 9.08E-04 | 0        | 0        | 6.50E-05 | 2.86E-04 | 0        | 0        | 0        | 4.30E-05 |
| 0.001317 | 0.012358 | 0        | 0        | 2.00E-05 | 1.44E-04 | 0        | 6.00E-05 | 0        | 2.80E-05 | 0        | 0        | 0        | 0.001255 | 0        |
| 0.006317 | 1.48E-04 | 5.50E-05 | 2.31E-04 | 0        | 0.005479 | 0.006664 | 1.14E-04 | 0.001811 | 2.94E-04 | 0.014852 | 3.26E-04 | 2.63E-04 | 0.003105 | 1.70E-04 |
| 0        | 5.33E-04 | 0        | 6.70E-05 | 0.003695 | 1.52E-04 | 0        | 4.20E-04 | 2.00E-04 | 0        | 0        | 0        | 3.25E-04 | 0        | 0        |
| 2.14E-04 | 0.001169 | 4.60E-05 | 1.20E-04 | 1.02E-04 | 4.69E-04 | 1.54E-04 | 4.67E-04 | 1.19E-04 | 4.34E-04 | 7.70E-04 | 0.059205 | 2.90E-05 | 0.039587 | 0.00363  |
| 3.90E-05 | 0.001799 | 0        | 3.18E-04 | 0.004617 | 0.00259  | 3.09E-04 | 7.24E-04 | 0.00326  | 3.50E-05 | 0        | 5.50E-05 | 0        | 2.30E-05 | 0        |
| 0        | 2.13E-04 | 0        | 0        | 0.002567 | 7.41E-04 | 0        | 1.90E-05 | 5.80E-05 | 0        | 0        | 5.70E-05 | 3.50E-05 | 0.002793 | 0        |
| 4.99E-04 | 0.009856 | 1.72E-04 | 0        | 7.47E-04 | 0.009052 | 0.005543 | 0.013656 | 0.003347 | 0.002183 | 0.005781 | 3.10E-05 | 0.002402 | 4.80E-05 | 0        |
| 0.016564 | 3.70E-05 | 0.005638 | 0        | 4.70E-05 | 0.021396 | 0        | 2.50E-05 | 0.001093 | 1.13E-04 | 5.50E-04 | 0        | 0.002414 | 0        | 4.90E-05 |
| 3.38E-04 | 1.20E-04 | 0.002669 | 8.20E-04 | 5.70E-05 | 4.58E-04 | 5.24E-04 | 5.20E-05 | 4.83E-04 | 3.12E-04 | 2.60E-04 | 1.50E-05 | 0        | 0        | 0.010095 |
| 1.65E-04 | 0        | 0        | 0        | 0        | 0        | 0        | 0.001089 | 0        | 0        | 4.40E-05 | 6.82E-04 | 0        | 0.001048 | 7.90E-05 |
| 2.05E-04 | 2.59E-04 | 4.38E-04 | 6.15E-04 | 6.80E-05 | 3.88E-04 | 2.47E-04 | 2.94E-04 | 5.29E-04 | 3.15E-04 | 1.64E-04 | 0        | 1.42E-04 | 1.40E-05 | 0.005052 |
| 1.76E-04 | 0        | 7.40E-05 | 0        | 0        | 0        | 0        | 6.50E-04 | 0        | 0        | 0        | 4.16E-04 | 0        | 9.77E-04 | 0        |
| 6.80E-04 | 6.80E-05 | 3.10E-05 | 0        | 0        | 4.40E-05 | 0        | 0        | 0        | 0        | 5.90E-05 | 0        | 3.43E-04 | 5.40E-05 | 5.82E-04 |
| 1.52E-04 | 9.20E-05 | 1.57E-04 | 1.95E-04 | 4.07E-04 | 0.00162  | 3.51E-04 | 0        | 1.25E-04 | 6.90E-05 | 4.80E-04 | 2.23E-04 | 1.66E-04 | 8.06E-04 | 0        |
| 4.86E-04 | 0        | 1.10E-04 | 0        | 0        | 0        | 0        | 4.96E-04 | 0        | 0        | 1.60E-04 | 3.60E-04 | 0        | 9.21E-04 | 0        |
| 0        | 6.40E-05 | 0        | 5.80E-05 | 2.44E-04 | 2.61E-04 | 5.38E-04 | 4.93E-04 | 1.99E-04 | 4.39E-04 | 4.30E-05 | 2.00E-05 | 0        | 0        | 0        |
| 0        | 0        | 0        | 0        | 0        | 0        | 0        | 0        | 0        | 0        | 4.16E-04 | 0        | 6.80E-05 | 0        | 0.001466 |
| 0        | 4.30E-05 | 0        | 2.38E-04 | 1.50E-05 | 0        | 7.60E-05 | 4.40E-05 | 2.67E-04 | 1.05E-04 | 4.60E-05 | 0        | 0        | 1.80E-05 | 3.30E-05 |
| 0        | 0        | 0        | 0        | 5.05E-04 | 1.66E-04 | 0        | 0        | 6.60E-05 | 0        | 0        | 0        | 0        | 1.50E-05 | 0        |
| 0        | 1.66E-04 | 0        | 0        | 1.14E-04 | 4.80E-05 | 7.10E-05 | 1.28E-04 | 0        | 0        | 0        | 0        | 0        | 0.001035 | 0        |
| 3.35E-04 | 7.12E-04 | 0        | 1.33E-04 | 2.10E-05 | 1.37E-04 | 7.00E-05 | 0        | 1.30E-04 | 6.60E-05 | 0.001454 | 2.70E-05 | 0        | 1.64E-04 | 4.90E-05 |
| 0        | 0        | 0        | 0        | 0        | 0        | 0        | 0        | 0        | 0        | 1.24E-04 | 0.028598 | 0        | 2.19E-04 | 0        |
| 0        | 0        | 0        | 0        | 0        | 0        | 0        | 0        | 0        | 0        | 0        | 0        | 0        | 0        | 0        |
| 0        | 0        | 0        | 0        | 0        | 0        | 0        | 9.60E-05 | 0        | 0        | 0        | 0        | 0        | 8.70E-05 | 0        |
| 0.003203 | 0.0093   | 0.003201 | 0.003401 | 0.009371 | 0.003322 | 0.004754 | 0.005532 | 0.005079 | 0.003652 | 0.003734 | 0.003368 | 0.007797 | 0.022253 | 0.006093 |

| CP68     | CP42     | CP56     | CP39     | CP44     | CP63     | CP47     | CP10     | CP51     | CP72     | CP29     | CP13     | CP61     | CP05     | CP59     |
|----------|----------|----------|----------|----------|----------|----------|----------|----------|----------|----------|----------|----------|----------|----------|
| 0.080826 | 0.078296 | 0.077049 | 0.0725   | 0.06927  | 0.061147 | 0.05604  | 0.054304 | 0.051598 | 0.050016 | 0.047694 | 0.03881  | 0.036666 | 0.033624 | 0.03329  |
| 2.65E-04 | 0.197106 | 0.683173 | 0.001222 | 0.439546 | 0.246413 | 0.031925 | 0.638654 | 0.336212 | 6.20E-05 | 3.11E-04 | 0.002637 | 0.260244 | 0.119901 | 0.736433 |
| 0.133925 | 0.055233 | 0.044536 | 0.155934 | 0.078144 | 0.02341  | 0.035847 | 0.023049 | 0.073871 | 0.114113 | 0.514387 | 0.087621 | 0.040642 | 0.040781 | 0.026185 |
| 0.263218 | 0.165084 | 0.01604  | 0.068766 | 0.016244 | 0.080196 | 0.003689 | 0.011591 | 0.047746 | 0.425692 | 0.018225 | 0.294362 | 0.046753 | 0.067937 | 0.017212 |
| 0.004315 | 0.00573  | 4.90E-04 | 3.12E-04 | 0.004791 | 0.001277 | 4.01E-04 | 0.068554 | 0.038091 | 0.001229 | 0.375376 | 5.90E-05 | 0.152448 | 0.357624 | 0.026403 |
| 0.001281 | 0.009432 | 0.094784 | 0.233643 | 0.065267 | 0.114784 | 0.637236 | 0.009979 | 0.150454 | 0.013102 | 0.003158 | 0.007062 | 0.06385  | 0.095833 | 0.015057 |
| 0.295893 | 0.054753 | 0.002079 | 0.007474 | 0.053749 | 0.05727  | 8.10E-05 | 0.006694 | 0.033838 | 0.093606 | 0.012865 | 0.294794 | 0.030993 | 0.121098 | 0.022933 |
| 0.045249 | 0.07701  | 0.010495 | 0.301763 | 0.002384 | 0.010108 | 0.004291 | 0.002757 | 0.01384  | 0.019811 | 6.10E-05 | 0.143136 | 0.001175 | 0.033045 | 0.03789  |
| 3.34E-04 | 0.030159 | 0.010626 | 0.0033   | 0.160813 | 0.311809 | 0.117129 | 0.082902 | 0.069108 | 0.022744 | 0        | 0.006804 | 0.137946 | 0        | 0.03052  |
| 0.002239 | 0.010149 | 0.002893 | 0.001159 | 1.42E-04 | 0.022902 | 0.003215 | 0.02234  | 0.047924 | 0.002891 | 0.002127 | 0.0013   | 0.021368 | 0.010825 | 0.004248 |
| 0.009382 | 0.084443 | 2.43E-04 | 0.004684 | 0.005398 | 0.02484  | 2.53E-04 | 0.001895 | 0.027964 | 0.042899 | 3.81E-04 | 5.12E-04 | 0.020361 | 0.004345 | 0.011256 |
| 0.001746 | 0.029343 | 0.023731 | 0.020399 | 0.022231 | 0.002425 | 0.004904 | 0.023871 | 1.10E-05 | 0.004032 | 0.004454 | 0.026285 | 0.005195 | 0.028333 | 0.003262 |
| 7.00E-05 | 0.018661 | 0.005804 | 0.013817 | 0.017526 | 0.010047 | 0.072451 | 0.00807  | 0.010798 | 0.006177 | 0.001702 | 0.002429 | 0.010032 | 0.009933 | 0.00687  |
| 0.003195 | 4.83E-04 | 0        | 0        | 0        | 1.73E-04 | 3.04E-04 | 0        | 0.019891 | 0.002572 | 0        | 5.10E-05 | 3.20E-05 | 3.18E-04 | 3.80E-05 |
| 0.014474 | 0.001984 | 0.001375 | 8.40E-05 | 0.007869 | 0.004998 | 7.33E-04 | 0.003534 | 0.00303  | 0.002645 | 7.00E-04 | 0.001001 | 0.014816 | 0.027714 | 8.01E-04 |
| 0.012446 | 0.002205 | 8.57E-04 | 0.002296 | 1.36E-04 | 0.001714 | 7.09E-04 | 0        | 0.006757 | 0.018968 | 0        | 0.001444 | 0.008009 | 0        | 0.00218  |
| 1.99E-04 | 0.003496 | 0.001007 | 0.001455 | 0.002529 | 0.001321 | 0.002273 | 0.001026 | 0.001664 | 0.007082 | 0        | 7.10E-05 | 0.004185 | 3.19E-04 | 0.001671 |
| 2.20E-04 | 0.004329 | 6.27E-04 | 0.01313  | 0.006449 | 0.001556 | 0.001606 | 0.002548 | 0.001214 | 0.01434  | 0        | 0.002286 | 0.019162 | 5.60E-05 | 0.002705 |
| 0.002626 | 0.014518 | 9.55E-04 | 0.009451 | 0.00118  | 3.57E-04 | 0        | 3.99E-04 | 0        | 0.00154  | 0        | 0.065186 | 5.60E-05 | 0.017349 | 0.001558 |
| 0.001554 | 0.002956 | 5.09E-04 | 0.003268 | 0.001893 | 0.002016 | 3.17E-04 | 3.04E-04 | 0.011854 | 0.077259 | 0        | 0.008619 | 0.006066 | 0        | 0.001968 |
| 0.001629 | 0.001918 | 1.23E-04 | 0.006091 | 2.67E-04 | 0.005538 | 3.84E-04 | 0        | 0.007288 | 0.017858 | 0.00184  | 9.35E-04 | 0.002321 | 0.002777 | 0.002111 |
| 0.081868 | 3.60E-04 | 2.33E-04 | 3.26E-04 | 0.00593  | 0.00181  | 0.001678 | 0.002017 | 0.011854 | 9.80E-05 | 0        | 1.43E-04 | 0.030096 | 0.005671 | 0.002083 |
| 3.74E-04 | 0.013327 | 0.001006 | 0.004752 | 0.003793 | 3.59E-04 | 0.002268 | 0.002017 | 1.50E-05 | 0.002376 | 0.003161 | 0.002305 | 4.03E-04 | 0.002991 | 4.03E-04 |
| 0        | 0        | 0        | 0        | 0        | 0        | 0        | 0        | 2.05E-04 | 8.10E-05 | 0        | 0        | 0        | 0        | 0        |
| 0        | 0.002105 | 2.50E-04 | 0.005444 | 0.015372 | 3.46E-04 | 0.015517 | 0.004052 | 5.06E-04 | 0.009497 | 1.18E-04 | 0.004821 | 0.01569  | 7.60E-05 | 0.001725 |
| 0        | 0.002477 | 0.00149  | 8.60E-05 | 0        | 9.37E-04 | 3.05E-04 | 0.008427 | 0        | 2.60E-05 | 0        | 6.00E-05 | 0.001261 | 0.00355  | 8.95E-04 |
| 6.26E-04 | 0.017566 | 3.90E-04 | 0.002285 | 0.001739 | 0.001223 | 9.00E-05 | 5.98E-04 | 4.10E-05 | 0.00713  | 1.69E-04 | 6.00E-05 | 4.21E-04 | 0.001853 | 5.18E-04 |
| 1.62E-04 | 3.62E-04 | 0.002247 | 4.85E-04 | 0        | 0.001563 | 5.20E-05 | 0.001216 | 0.001978 | 0.001819 | 0.001029 | 2.45E-04 | 0.005595 | 6.03E-04 | 0.001317 |
| 0.001063 | 0.005112 | 0        | 0.004432 | 1.38E-04 | 7.70E-05 | 3.21E-04 | 1.99E-04 | 0.002138 | 0.006931 | 1.33E-04 | 5.64E-04 | 6.09E-04 | 1.27E-04 | 4.71E-04 |
| 2.39E-04 | 0.002    | 6.30E-04 | 0.030737 | 0        | 1.52E-04 | 8.70E-05 | 1.03E-04 | 1.26E-04 | 0.006836 | 0.002244 | 0        | 1.33E-04 | 0        | 1.65E-04 |
| 2.30E-05 | 0        | 2.51E-04 | 0        | 0        | 0        | 0        | 0        | 0        | 0        | 0        | 0        | 0.003034 | 1.28E-04 | 6.40E-05 |
| 0        | 0.004112 | 0.0011   | 8.30E-05 | 0        | 4.18E-04 | 3.70E-04 | 0.012024 | 0        | 0        | 0        | 0        | 0.002002 | 0.001094 | 1.59E-04 |
| 0        | 0.060682 | 2.35E-04 | 0        | 0        | 0        | 0        | 0        | 1.70E-05 | 0        | 5.80E-05 | 0        | 4.95E-04 | 0        | 3.88E-04 |
| 0.002546 | 8.59E-04 | 0.006677 | 0.014078 | 1.31E-04 | 0        | 2.60E-04 | 1.00E-04 | 2.20E-04 | 4.01E-04 | 0.005073 | 5.66E-04 | 0.001638 | 0        | 9.40E-05 |
| 0.00266  | 0        | 0        | 0        | 0        | 0        | 4.30E-05 | 0        | 6.00E-06 | 0.001884 | 0        | 0        | 0.005419 | 2.33E-04 | 1.37E-04 |
| 9.35E-04 | 6.20E-04 | 1.25E-04 | 2.48E-04 | 1.22E-04 | 0.003204 | 8.96E-04 | 3.27E-04 | 0.008749 | 8.10E-05 | 3.05E-04 | 3.18E-04 | 0.002355 | 0        | 9.14E-04 |
| 0.008444 | 4.94E-04 | 3.56E-04 | 0        | 0        | 1.02E-04 | 0        | 0        | 5.80E-04 | 7.68E-04 | 0        | 0        | 0.004921 | 0.001343 | 1.69E-04 |
| 2.40E-05 | 0        | 0        | 0        | 0        | 4.10E-05 | 3.70E-05 | 9.60E-05 | 2.06E-04 | 3.10E-05 | 1.07E-04 | 0        | 6.11E-04 | 7.60E-05 | 0.001109 |
| 2.60E-05 | 1.30E-04 | 3.93E-04 | 0.002918 | 3.99E-04 | 4.00E-05 | 0        | 3.05E-04 | 0.001304 | 0.002599 | 0        | 5.80E-05 | 0.001253 | 0        | 0.001018 |
| 0        | 0.012085 | 0.001295 | 0.004066 | 0.003474 | 0        | 9.43E-04 | 3.03E-04 | 0.002194 | 0        | 0        | 4.23E-04 | 1.86E-04 | 0        | 3.10E-05 |
| 5.20E-05 | 0.002619 | 3.74E-04 | 0.001404 | 9.55E-04 | 3.60E-05 | 9.10E-05 | 2.08E-04 | 0        | 0.005135 | 0        | 0.002571 | 2.64E-04 | 0        | 5.00E-05 |
| 6.70E-05 | 0        | 0        | 0        | 0        | 7.50E-05 | 4.60E-05 | 0        | 0.001461 | 2.38E-04 | 0        | 0        | 0        | 0        | 0        |
| 8.40E-05 | 0.01168  | 0        | 9.44E-04 | 9.53E-04 | 3.35E-04 | 0        | 3.92E-04 | 0        | 0.001831 | 9.00E-05 | 1.27E-04 | 3.02E-04 | 2.81E-04 | 1.89E-04 |
| 2.84E-04 | 0        | 0        | 0        | 0        | 0        | 0        | 0        | 0.00115  | 3.25E-04 | 0        | 0        | 0        | 0        | 0        |
| 0        | 0        | 0        | 1.33E-04 | 1.49E-04 | 0        | 3.30E-05 | 0        | 1.10E-05 | 2.90E-05 | 0        | 2.60E-04 | 9.10E-05 | 5.90E-05 | 0        |
| 0        | 3.62E-04 | 0.001303 | 0        | 0.001361 | 7.60E-05 | 2.25E-04 | 0.002121 | 2.42E-04 | 0        | 0        | 0        | 5.79E-04 | 1.30E-04 | 2.62E-04 |
| 9.30E-05 | 0        | 0        | 0        | 0        | 2.80E-05 | 4.00E-05 | 0        | 7.98E-04 | 1.46E-04 | 0        | 0        | 0        | 0        | 0        |
| 8.60E-05 | 1.21E-04 | 0        | 0        | 0.001568 | 0        | 4.54E-04 | 0        | 1.61E-04 | 2.53E-04 | 0        | 5.80E-05 | 0.008435 | 0        | 6.20E-05 |
| 2.00E-05 | 0        | 0        | 0        | 0        | 0        | 0        | 0        | 1.90E-05 | 0        | 0        | 0        | 0        | 0        | 0        |
| 0        | 0        | 0        | 0        | 5.39E-04 | 4.00E-05 | 9.40E-05 | 2.02E-04 | 1.70E-05 | 5.10E-05 | 0        | 0        | 9.00E-05 | 6.20E-05 | 0        |
| 3.00E-05 | 0        | 0        | 0        | 0        | 9.00E-05 | 0        | 0        | 0        | 0        | 0        | 0        | 3.40E-05 | 0        | 0        |
| 2.53E-04 | 0        | 0        | 0        | 3.95E-04 | 6.50E-05 | 0        | 0        | 6.80E-05 | 7.16E-04 | 0        | 0        | 0.001545 | 0        | 9.70E-05 |
| 0.001232 | 0        | 0        | 8.24E-04 | 0        | 8.70E-05 | 0        | 0        | 7.20E-05 | 8.90E-04 | 5.30E-05 | 3.29E-04 | 7.44E-04 | 0        | 2.40E-05 |
| 0        | 0        | 0        | 0        | 0        | 0        | 0        | 0        | 8.60E-05 | 5.50E-05 | 0        | 0        | 0        | 0        | 0        |
| 0        | 0        | 0        | 0        | 0        | 0        | 0        | 0        | 0        | 0        | 0        | 0        | 0        | 0        | 0        |
| 0.014913 | 0        | 0        | 0        | 0        | 0        | 0        | 0        | 4.00E-06 | 3.30E-05 | 0        | 0        | 0        | 0        | 0        |
| 0.00881  | 0.015639 | 0.004249 | 0.006007 | 0.007154 | 0.004595 | 0.002362 | 0.002822 | 0.012619 | 0.011102 | 0.004179 | 0.001688 | 0.029474 | 0.009911 | 0.003065 |

| CP46     | CP12     | CP06     | CP22     | CP01     | CP07     | CP54     | CP38     | CP19     | CP24     | CP21     | CP18     | CP65     | CP08     | CP58     |
|----------|----------|----------|----------|----------|----------|----------|----------|----------|----------|----------|----------|----------|----------|----------|
| 0.03268  | 0.031995 | 0.028575 | 0.02656  | 0.023122 | 0.018457 | 0.015172 | 0.013622 | 0.013275 | 0.012118 | 0.007827 | 0.006896 | 0.006073 | 0.003472 | 0.003372 |
| 0.060846 | 0.767602 | 0.104441 | 0.072419 | 5.21E-04 | 0.005204 | 0.786058 | 6.50E-04 | 0.775247 | 0.013917 | 0.825581 | 0.049835 | 0.934035 | 0.018616 | 0.861216 |
| 0.095922 | 0.023366 | 0.14498  | 0.095995 | 0.019152 | 0.322818 | 0.021385 | 0.139722 | 0.02415  | 0.023142 | 0.010923 | 0.050479 | 0.006544 | 0.00116  | 0.009358 |
| 0.011558 | 0.016333 | 0.135998 | 0.129963 | 0.13317  | 0.104958 | 0.018535 | 0.025483 | 0.025945 | 0.336131 | 0.00451  | 0.314498 | 3.63E-04 | 0.102686 | 0.004918 |
| 6.20E-05 | 0.033819 | 0.005214 | 0.137423 | 9.74E-04 | 4.46E-04 | 0.003578 | 0.085033 | 0.027621 | 0.069572 | 0.0269   | 0.045022 | 3.33E-04 | 8.40E-05 | 0.009357 |
| 0.628378 | 0.021325 | 0.154313 | 0.011939 | 0.008295 | 0.120369 | 0.024983 | 0        | 0.011946 | 0.006094 | 0.002409 | 0.007072 | 0.01149  | 0.290638 | 0.004952 |
| 0.011159 | 0.002531 | 0.044123 | 0.126323 | 0.617275 | 0.008187 | 0.007463 | 0.401095 | 0.005787 | 0.256096 | 0.010268 | 0.237526 | 0.001585 | 0.234457 | 0.003152 |
| 0.099364 | 0.010884 | 0.062126 | 0.05885  | 0.093903 | 0.072224 | 0.009103 | 0.145912 | 0.004251 | 0.085208 | 0.006017 | 0.041299 | 0.001939 | 0.283938 | 0.001713 |
| 0.003914 | 0.038897 | 0.001379 | 0.068769 | 6.30E-05 | 0.234082 | 0.005503 | 7.60E-05 | 0.035324 | 0.007778 | 0.05503  | 0.00721  | 0.013418 | 4.81E-04 | 0.034236 |
| 0.011908 | 0.00202  | 0.09145  | 0.009438 | 5.72E-04 | 5.91E-04 | 0.013471 | 0        | 0.003193 | 0.01244  | 0.006135 | 0.007088 | 0.003603 | 0.03803  | 0.007118 |
| 0.007122 | 0.001238 | 0.114939 | 0.034548 | 0.006699 | 0.008401 | 5.81E-04 | 0.074742 | 4.61E-04 | 0.055787 | 4.23E-04 | 0.04112  | 0.001789 | 1.15E-04 | 6.69E-04 |
| 0.005695 | 0.017078 | 0.006282 | 0.026235 | 0.011658 | 0.025898 | 0.035367 | 0.019922 | 0.02256  | 0.012037 | 0.011855 | 0.017955 | 0.002513 | 0.002489 | 0.019785 |
| 0.004995 | 0.004812 | 0.009932 | 0.018549 | 9.54E-04 | 0.010252 | 0.009421 | 1.34E-04 | 0.007395 | 0.002201 | 0.004059 | 0.002881 | 0.004357 | 2.18E-04 | 0.010462 |
| 2.39E-04 | 0        | 0.004336 | 7.70E-05 | 4.59E-04 | 0        | 0        | 7.30E-05 | 1.90E-04 | 0.001424 | 0        | 2.82E-04 | 1.28E-04 | 7.32E-04 | 1.15E-04 |
| 2.15E-04 | 0.001362 | 0.007914 | 0.018716 | 0.004648 | 0.00175  | 0        | 0        | 0.001293 | 0.002976 | 0.001067 | 0.012892 | 3.50E-05 | 9.30E-05 | 9.36E-04 |
| 8.07E-04 | 0.001175 | 3.91E-04 | 0.006963 | 3.60E-05 | 0        | 0.003214 | 0        | 6.06E-04 | 0.015236 | 5.67E-04 | 0.005509 | 1.16E-04 | 8.20E-05 | 2.13E-04 |
| 3.62E-04 | 0.002412 | 0.002301 | 0.005164 | 0.001832 | 0.003191 | 4.26E-04 | 0        | 1.72E-04 | 9.65E-04 | 5.78E-04 | 0.006181 | 1.71E-04 | 1.90E-05 | 9.25E-04 |
| 5.98E-04 | 7.57E-04 | 0.016127 | 0.010182 | 9.10E-05 | 2.86E-04 | 8.65E-04 | 6.80E-05 | 0.001459 | 0.003461 | 7.77E-04 | 0.003837 | 2.21E-04 | 9.70E-05 | 0.001665 |
| 0.00262  | 8.50E-04 | 0.00235  | 0.01633  | 0.059748 | 0.004942 | 0.002278 | 0.060744 | 9.00E-04 | 0.014223 | 0.00146  | 0.010636 | 2.53E-04 | 0.018923 | 4.84E-04 |
| 0.002654 | 4.14E-04 | 5.03E-04 | 0.027719 | 4.20E-05 | 6.00E-04 | 0        | 0        | 3.41E-04 | 0.024086 | 1.21E-04 | 0.033238 | 0        | 1.60E-05 | 4.38E-04 |
| 0.00135  | 0.001688 | 0.001707 | 0.002313 | 4.78E-04 | 1.61E-04 | 2.93E-04 | 4.48E-04 | 4.29E-04 | 0.002558 | 6.15E-04 | 0.002359 | 2.82E-04 | 8.50E-05 | 0.001087 |
| 0        | 5.12E-04 | 0.007508 | 0.005133 | 0.001235 | 1.51E-04 | 8.51E-04 | 8.30E-05 | 0.009089 | 7.64E-04 | 5.58E-04 | 4.51E-04 | 9.80E-05 | 1.17E-04 | 0.002231 |
| 0.001777 | 0.001743 | 0.008153 | 0.008677 | 0.0044   | 0.025831 | 0.001455 | 0.015027 | 0.001438 | 0.002055 | 6.22E-04 | 0.004346 | 1.04E-04 | 2.10E-05 | 8.03E-04 |
| 0        | 0        | 2.20E-05 | 0        | 0        | 0        | 0        | 0        | 0        | 0        | 0        | 0        | 0        | 0        | 0        |
| 0.002215 | 0.004521 | 0.001644 | 0.01071  | 8.30E-05 | 0.006117 | 0        | 0        | 0.011083 | 0.001153 | 0.004256 | 0.012955 | 2.21E-04 | 1.39E-04 | 3.13E-04 |
| 0.002013 | 0.001592 | 0.00253  | 0.001621 | 3.00E-05 | 0        | 0.006163 | 7.40E-05 | 0.002363 | 6.16E-04 | 0.004457 | 7.66E-04 | 0.003936 | 2.36E-04 | 0.004666 |
| 5.29E-04 | 7.59E-04 | 0.007101 | 0.014511 | 0.004597 | 0.005597 | 5.55E-04 | 0.004827 | 9.00E-05 | 0.01464  | 1.23E-04 | 0.017111 | 8.50E-05 | 0        | 2.23E-04 |
| 6.60E-05 | 3.62E-04 | 1.29E-04 | 3.15E-04 | 0        | 1.43E-04 | 0.001448 | 0        | 1.63E-04 | 9.48E-04 | 0.001047 | 5.50E-05 | 7.11E-04 | 1.59E-04 | 3.33E-04 |
| 0.00109  | 2.99E-04 | 0.003957 | 6.44E-04 | 0.001782 | 0.001354 | 1.42E-04 | 0        | 9.80E-05 | 7.11E-04 | 0        | 6.64E-04 | 5.70E-05 | 3.60E-05 | 0        |
| 0.003308 | 5.50E-05 | 0.003469 | 7.40E-05 | 0        | 0.005257 | 0        | 0.002829 | 2.53E-04 | 9.90E-05 | 1.91E-04 | 0        | 6.00E-05 | 9.60E-05 | 2.36E-04 |
| 0        | 3.09E-04 | 1.22E-04 | 0.010577 | 0        | 0        | 1.42E-04 | 0        | 1.75E-04 | 2.80E-05 | 4.43E-04 | 4.58E-04 | 0        | 0        | 0        |
| 1.56E-04 | 0.002512 | 0.001505 | 0.001052 | 0        | 0        | 0.016702 | 0        | 0.001828 | 1.20E-04 | 0.007687 | 3.01E-04 | 0.002562 | 1.32E-04 | 0.009591 |
| 0        | 0        | 3.00E-05 | 7.80E-05 | 0        | 0        | 0        | 2.11E-04 | 3.20E-04 | 8.24E-04 | 0        | 0.025664 | 0        | 9.30E-05 | 0        |
| 3.22E-04 | 2.10E-04 | 0.001986 | 3.30E-04 | 1.11E-04 | 0        | 7.19E-04 | 8.21E-04 | 4.33E-04 | 2.80E-04 | 5.80E-05 | 9.42E-04 | 0        | 3.60E-05 | 2.34E-04 |
| 0        | 0        | 3.00E-04 | 0.010976 | 0        | 1.60E-04 | 0        | 0        | 1.60E-04 | 0.001027 | 8.50E-05 | 0.002712 | 0        | 0        | 0        |
| 5.42E-04 | 1.89E-04 | 6.60E-04 | 0        | 1.65E-04 | 2.96E-04 | 2.85E-04 | 0.002151 | 2.73E-04 | 1.40E-04 | 1.14E-04 | 2.10E-04 | 4.86E-04 | 1.29E-04 | 0        |
| 0        | 0.001165 | 0.001212 | 0        | 4.00E-05 | 0.001497 | 0        | 0        | 0        | 2.56E-04 | 6.10E-05 | 0        | 1.19E-04 | 1.90E-05 | 1.18E-04 |
| 0        | 6.30E-05 | 0.004323 | 1.75E-04 | 0        | 1.46E-04 | 5.65E-04 | 5.56E-04 | 1.82E-04 | 5.58E-04 | 2.44E-04 | 0.001712 | 0        | 9.47E-04 | 0        |
| 4.40E-04 | 4.38E-04 | 2.20E-05 | 7.38E-04 | 0        | 2.91E-04 | 8.46E-04 | 0        | 2.64E-04 | 5.02E-04 | 0        | 5.35E-04 | 5.40E-05 | 2.30E-05 | 0        |
| 3.40E-05 | 1.77E-04 | 0        | 1.50E-04 | 0        | 1.51E-04 | 0.001417 | 0        | 8.70E-04 | 1.76E-04 | 6.10E-05 | 0        | 0        | 0        | 0        |
| 4.85E-04 | 2.39E-04 | 3.34E-04 | 0.006377 | 0        | 0.001024 | 1.50E-04 | 6.50E-05 | 3.43E-04 | 0.001328 | 0        | 0.004154 | 9.70E-05 | 0        | 2.25E-04 |
| 2.00E-05 | 0        | 2.72E-04 | 0        | 0        | 0        | 0        | 0        | 0        | 1.29E-04 | 6.30E-05 | 0        | 0        | 4.00E-05 | 0        |
| 1.20E-04 | 4.35E-04 | 0.003249 | 0.00374  | 0.001602 | 0.002669 | 1.39E-04 | 0.001698 | 1.77E-04 | 0.005091 | 0        | 0.005384 | 5.60E-05 | 0        | 0        |
| 0        | 0        | 3.24E-04 | 0        | 3.80E-05 | 0        | 0        | 0        | 0        | 1.08E-04 | 0        | 1.22E-04 | 0        | 0        | 0        |
| 0        | 5.80E-05 | 0        | 8.30E-05 | 0        | 0        | 0        | 0        | 0        | 7.40E-05 | 5.90E-05 | 5.70E-05 | 0        | 0        | 0        |
| 3.40E-05 | 5.39E-04 | 1.11E-04 | 8.10E-05 | 0        | 0        | 0.008257 | 0        | 5.34E-04 | 2.50E-05 | 1.89E-04 | 1.73E-04 | 0.001735 | 3.40E-05 | 0.002509 |
| 0        | 0        | 2.35E-04 | 0        | 0        | 0        | 0        | 0        | 0        | 1.08E-04 | 0        | 0        | 0        | 3.10E-05 | 0        |
| 0        | 3.65E-04 | 0        | 6.78E-04 | 0        | 0        | 0        | 0        | 0.001079 | 2.42E-04 | 8.58E-04 | 2.30E-04 | 0        | 1.80E-05 | 1.13E-04 |
| 6.10E-05 | 0        | 0        | 0        | 0        | 0        | 0        | 0        | 0        | 0        | 0        | 0        | 0        | 5.10E-05 | 0        |
| 0        | 1.86E-04 | 1.40E-05 | 3.33E-04 | 3.40E-05 | 4.56E-04 | 1.54E-04 | 0        | 0        | 2.90E-05 | 0        | 1.15E-04 | 0        | 0        | 0        |
| 2.60E-05 | 6.20E-05 | 2.86E-04 | 0.0011   | 3.70E-05 | 0        | 0        | 1.52E-04 | 0        | 2.32E-04 | 0        | 6.00E-04 | 0        | 0        | 0        |
| 0        | 0        | 0        | 4.73E-04 | 0        | 1.52E-04 | 0        | 0        | 0        | 4.60E-05 | 5.80E-05 | 5.63E-04 | 0        | 3.00E-05 | 0        |
| 8.80E-05 | 6.30E-05 | 0        | 4.04E-04 | 0        | 0        | 0        | 0        | 9.60E-05 | 1.25E-04 | 0        | 0.00139  | 0        | 0        | 0        |
| 0        | 0        | 0        | 0        | 0        | 0        | 0        | 0        | 0        | 0        | 0        | 0        | 0        | 0        | 0        |
| 0        | 0        | 0        | 0        | 0        | 0        | 0        | 0        | 0        | 0        | 0        | 0        | 0        | 0        | 0        |
| 0        | 0        | 1.32E-04 | 0        | 0        | 0        | 0        | 0        | 0        | 0        | 0        | 1.77E-04 | 0        | 0        | 0        |
| 0.004226 | 0.002589 | 0.010989 | 0.016495 | 0.002154 | 0.005891 | 0.002314 | 0.003782 | 0.006144 | 0.010116 | 0.001644 | 0.014338 | 3.71E-04 | 0.001182 | 0.002234 |

| CP23     | HC119    | HC121    | HC061    | HC064    | HC020    | HC056    | HC050    | HC036    | HC043    | HC013    | HC091    | HC069    | HC118    | HC046    |
|----------|----------|----------|----------|----------|----------|----------|----------|----------|----------|----------|----------|----------|----------|----------|
| 6.58E-04 | 0.752069 | 0.730112 | 0.646318 | 0.60942  | 0.59542  | 0.560912 | 0.543437 | 0.52084  | 0.518021 | 0.517551 | 0.508667 | 0.482231 | 0.478289 | 0.471949 |
| 2.94E-04 | 0.002305 | 0.008102 | 0.002142 | 0.04817  | 0.033132 | 0.03696  | 0.017    | 1.08E-04 | 0.011627 | 0.007408 | 0.098176 | 0.021595 | 0.083172 | 0.011685 |
| 3.05E-04 | 0.054645 | 0.055585 | 0.072961 | 0.086192 | 0.021996 | 0.088901 | 0.097623 | 0.160071 | 0.108511 | 0.164087 | 0.152471 | 0.150273 | 0.078965 | 0.180172 |
| 0.935253 | 0.054313 | 0.090236 | 0.045333 | 0.058071 | 0.151796 | 0.069132 | 0.02615  | 0.12734  | 0.077192 | 0.08799  | 0.056269 | 0.111724 | 0.026791 | 0.112643 |
| 4.53E-04 | 0.00166  | 0.00343  | 1.97E-04 | 0.005206 | 0.02269  | 0.052967 | 8.88E-04 | 6.70E-05 | 6.02E-04 | 0.001885 | 0.001262 | 3.18E-04 | 0.019793 | 0.00315  |
| 0.006097 | 0.009447 | 0.011581 | 0.003889 | 1.00E-04 | 0.005774 | 0.012536 | 0.007829 | 0.00152  | 0.019392 | 0.049831 | 0.001885 | 0.089716 | 0.080161 | 0.03979  |
| 3.63E-04 | 0.005198 | 0.012985 | 0.065158 | 0.03182  | 0.031495 | 0.033114 | 0.060093 | 0.010921 | 0.065786 | 0.034177 | 0.007136 | 0.004655 | 0.024805 | 0.032895 |
| 2.21E-04 | 0.035378 | 0.026483 | 0.063848 | 0.101043 | 0.009956 | 0.010914 | 0.064785 | 0.103662 | 0.060276 | 0.038968 | 0.045388 | 0.056519 | 0.023656 | 0.053849 |
| 9.87E-04 | 0.004232 | 0.006527 | 0.009574 | 9.42E-04 | 0.005692 | 0.036082 | 0.063305 | 1.55E-04 | 0.009576 | 0.004144 | 0.01342  | 0.003805 | 0.045247 | 0.010377 |
| 1.43E-04 | 0.00396  | 0.010474 | 0.005301 | 0.006332 | 7.29E-04 | 0.004767 | 0.025494 | 9.17E-04 | 0.015698 | 0.010423 | 0.044457 | 0.005549 | 0.039166 | 0.003122 |
| 0.009838 | 0.023099 | 0.001268 | 0.011262 | 0.008833 | 7.39E-04 | 0.003777 | 0.003095 | 0.002501 | 0.010828 | 0.005637 | 0.001608 | 0.001705 | 0.006673 | 0.001874 |
| 7.50E-05 | 0.003508 | 0.006007 | 0.008339 | 0.012523 | 0.006969 | 0.00893  | 0.007694 | 0.004687 | 0.006504 | 0.002779 | 0.013319 | 0.004298 | 0.018079 | 0.011088 |
| 2.76E-04 | 0.002552 | 0.002496 | 0.005943 | 9.61E-04 | 0.00484  | 0.005633 | 0.006853 | 0.002346 | 0.00754  | 0.00634  | 0.003532 | 0.005143 | 0.004243 | 0.003597 |
| 1.30E-04 | 1.08E-04 | 1.21E-04 | 1.41E-04 | 3.30E-05 | 0        | 5.70E-05 | 0        | 0        | 0.001386 | 0        | 1.34E-04 | 0        | 5.70E-05 | 7.10E-05 |
| 3.20E-05 | 0.001213 | 3.88E-04 | 0.001984 | 5.46E-04 | 0.031553 | 0.008199 | 0.004751 | 6.00E-05 | 0.001214 | 0.002558 | 0.011307 | 6.77E-04 | 0.005924 | 0.001316 |
| 6.40E-05 | 0.008245 | 0.008768 | 0.002058 | 0.005054 | 0.004443 | 0.005547 | 0.002001 | 0.018625 | 0.027412 | 0.003945 | 0.002937 | 0.008924 | 0.006807 | 0.02181  |
| 2.70E-05 | 0.002674 | 0.008949 | 0.006398 | 3.97E-04 | 0.047703 | 0.022046 | 0.016115 | 0.005183 | 0.005609 | 0.006173 | 0.005756 | 0.007574 | 0.004694 | 0.006928 |
| 8.20E-05 | 0.001406 | 0.001786 | 0.003352 | 2.79E-04 | 0.003639 | 0.005895 | 0.014    | 0.004027 | 0.001494 | 0.004292 | 0.00292  | 0.004171 | 0.003248 | 0.001943 |
| 0        | 6.61E-04 | 0.001475 | 0.012329 | 0.00907  | 0.001484 | 0.00154  | 0.007096 | 0.002215 | 0.005641 | 0.002388 | 0.001723 | 6.40E-04 | 0.003325 | 0.005768 |
| 0.012336 | 0.001181 | 3.83E-04 | 0.001609 | 0.001078 | 0.001147 | 0.001725 | 0.001519 | 1.06E-04 | 8.00E-04 | 7.97E-04 | 0.002505 | 1.93E-04 | 0.002339 | 7.25E-04 |
| 5.90E-05 | 0.006637 | 0.002753 | 0.004994 | 0.001381 | 0.003362 | 0.008621 | 0.002333 | 0.009296 | 0.004685 | 0.005926 | 0.001611 | 0.001152 | 0.006435 | 0.003518 |
| 8.70E-05 | 1.56E-04 | 3.90E-05 | 0        | 1.05E-04 | 5.20E-05 | 5.31E-04 | 8.60E-05 | 3.60E-05 | 6.99E-04 | 1.90E-04 | 2.30E-05 | 7.20E-05 | 1.78E-04 | 3.80E-04 |
| 6.50E-05 | 0.003993 | 0.002427 | 0.005653 | 0.004393 | 0.002098 | 0.004279 | 0.002297 | 0.003838 | 0.004198 | 0.00284  | 0.003987 | 0.002285 | 0.005091 | 0.005168 |
| 0        | 0        | 1.60E-05 | 0        | 0        | 0        | 0        | 0.006181 | 0.002292 | 0        | 0.005339 | 0        | 0.002359 | 0        | 0        |
| 5.80E-05 | 5.72E-04 | 2.46E-04 | 0.009155 | 0        | 0.003882 | 8.49E-04 | 0.004751 | 0.002676 | 5.28E-04 | 8.22E-04 | 0.003495 | 0.002226 | 0.002724 | 0.001991 |
| 2.70E-05 | 4.90E-05 | 2.09E-04 | 1.37E-04 | 0.001121 | 9.00E-05 | 6.74E-04 | 5.13E-04 | 0        | 7.64E-04 | 1.49E-04 | 0.005869 | 8.10E-05 | 0.005761 | 3.90E-04 |
| 0.01823  | 0.004246 | 5.03E-04 | 0.00296  | 0.004008 | 4.32E-04 | 0.001596 | 5.89E-04 | 9.40E-04 | 0.002919 | 9.79E-04 | 8.38E-04 | 6.18E-04 | 0.002564 | 0.001103 |
| 2.30E-05 | 0.002978 | 0.001896 | 1.27E-04 | 1.02E-04 | 1.67E-04 | 0.001061 | 0.001825 | 5.27E-04 | 0.012955 | 0.001292 | 4.54E-04 | 0.002398 | 0.005988 | 0.001132 |
| 9.00E-05 | 0.006375 | 0.002581 | 0.005148 | 2.00E-04 | 8.90E-05 | 3.66E-04 | 0.003256 | 0.007212 | 0.005504 | 0.010745 | 0.001744 | 0.008106 | 7.42E-04 | 0.004032 |
| 0        | 1.53E-04 | 1.03E-04 | 0        | 8.60E-05 | 0        | 8.40E-05 | 7.85E-04 | 5.17E-04 | 0.002477 | 0.008364 | 7.71E-04 | 6.78E-04 | 4.70E-04 | 0.001469 |
| 3.10E-05 | 9.30E-05 | 1.10E-05 | 0        | 6.80E-05 | 0        | 0.003316 | 4.14E-04 | 0        | 0        | 0        | 0        | 0        | 9.24E-04 | 6.40E-05 |
| 0        | 0        | 1.34E-04 | 0        | 3.14E-04 | 0        | 1.74E-04 | 3.65E-04 | 0        | 3.41E-04 | 6.30E-05 | 0.001658 | 7.30E-05 | 0.003857 | 0        |
| 2.80E-05 | 5.40E-05 | 1.90E-05 | 0        | 7.20E-05 | 0        | 7.90E-05 | 0        | 0        | 3.50E-05 | 7.92E-04 | 1.34E-04 | 0        | 0        | 5.24E-04 |
| 0        | 1.26E-04 | 1.11E-04 | 2.24E-04 | 3.80E-05 | 2.01E-04 | 7.80E-05 | 1.21E-04 | 0.001717 | 8.51E-04 | 0.005815 | 1.83E-04 | 0.012674 | 4.19E-04 | 4.97E-04 |
| 0        | 8.30E-05 | 2.20E-05 | 0        | 0        | 1.43E-04 | 1.70E-04 | 0.00102  | 0        | 0        | 1.15E-04 | 2.80E-05 | 0        | 2.19E-04 | 1.76E-04 |
| 0        | 1.78E-04 | 2.30E-04 | 1.00E-04 | 0        | 1.63E-04 | 1.50E-05 | 0        | 2.54E-04 | 0.00229  | 1.83E-04 | 0        | 0.001306 | 2.23E-04 | 1.23E-04 |
| 0        | 0        | 0        | 0        | 3.80E-05 | 3.86E-04 | 1.48E-04 | 3.97E-04 | 0        | 1.26E-04 | 5.60E-05 | 2.60E-05 | 4.10E-05 | 1.79E-04 | 5.02E-04 |
| 0        | 9.80E-05 | 2.50E-05 | 0        | 6.30E-05 | 1.72E-04 | 1.59E-04 | 0        | 0        | 0.001205 | 5.10E-05 | 0        | 0        | 0        | 8.60E-05 |
| 0        | 2.20E-04 | 2.80E-04 | 4.00E-05 | 0        | 6.30E-04 | 4.64E-04 | 3.03E-04 | 0.002055 | 0.001301 | 2.73E-04 | 1.23E-04 | 3.81E-04 | 3.70E-04 | 9.58E-04 |
| 0        | 4.25E-04 | 2.80E-05 | 1.44E-04 | 0        | 0        | 7.60E-05 | 0        | 9.40E-05 | 1.92E-04 | 0.001156 | 1.02E-04 | 0.002212 | 9.75E-04 | 2.02E-04 |
| 0.003511 | 3.40E-04 | 1.27E-04 | 6.38E-04 | 5.27E-04 | 1.10E-04 | 2.61E-04 | 4.33E-04 | 0        | 3.27E-04 | 1.43E-04 | 7.61E-04 | 4.30E-05 | 9.47E-04 | 3.20E-04 |
| 0        | 0        | 4.40E-05 | 0        | 3.40E-05 | 0        | 0        | 0        | 0        | 5.59E-04 | 0        | 0        | 0        | 0        | 0        |
| 0.004459 | 0.001114 | 7.10E-05 | 5.24E-04 | 1.88E-04 | 7.50E-05 | 3.49E-04 | 0        | 7.30E-05 | 4.83E-04 | 8.30E-05 | 8.80E-05 | 0        | 6.58E-04 | 1.91E-04 |
| 0        | 0        | 0        | 0        | 0        | 0        | 0        | 0        | 0        | 1.93E-04 | 0        | 0        | 0        | 0        | 0        |
| 0        | 0        | 0        | 0        | 3.10E-05 | 0        | 3.10E-05 | 3.40E-05 | 0        | 3.30E-05 | 0        | 1.15E-04 | 6.30E-05 | 0        | 0        |
| 4.20E-05 | 0        | 2.30E-05 | 0        | 6.40E-05 | 0        | 1.14E-04 | 0        | 0        | 4.00E-05 | 2.66E-04 | 9.20E-05 | 0        | 6.76E-04 | 2.80E-05 |
| 3.10E-05 | 0        | 2.10E-05 | 3.40E-05 | 0        | 0        | 0        | 0        | 0        | 1.48E-04 | 0        | 2.70E-05 | 0        | 0        | 0        |
| 0        | 2.50E-05 | 3.30E-05 | 1.82E-04 | 0        | 9.20E-05 | 4.90E-04 | 1.53E-04 | 0        | 9.40E-05 | 5.40E-05 | 1.80E-04 | 3.00E-05 | 5.90E-05 | 8.70E-05 |
| 0        | 1.72E-04 | 0        | 0        | 0        | 0        | 0        | 0        | 8.30E-05 | 0        | 1.79E-04 | 0        | 0        | 0        | 0        |
| 0        | 2.60E-05 | 3.60E-05 | 3.10E-05 | 0        | 0.002878 | 0.00104  | 3.47E-04 | 0        | 3.50E-05 | 0        | 2.97E-04 | 0        | 1.20E-04 | 0        |
| 2.00E-05 | 0        | 0        | 0        | 3.50E-05 | 0        | 0        | 0        | 0        | 0        | 0        | 0        | 0        | 0        | 1.37E-04 |
| 0        | 2.20E-05 | 0        | 3.40E-05 | 0        | 2.40E-05 | 1.06E-04 | 1.30E-04 | 0        | 2.70E-05 | 2.00E-05 | 1.71E-04 | 0        | 0        | 0        |
| 0        | 0        | 0        | 0        | 4.00E-05 | 0        | 1.10E-04 | 5.17E-04 | 3.20E-05 | 0        | 9.20E-05 | 3.36E-04 | 4.60E-05 | 0        | 5.01E-04 |
| 0        | 0        | 0        | 0        | 0        | 0        | 0        | 0        | 0        | 2.80E-05 | 7.70E-05 | 5.00E-05 | 0        | 0        | 0        |
| 0        | 0        | 0        | 0        | 0        | 0        | 0        | 0        | 0        | 0        | 0        | 0        | 0        | 0        | 0        |
| 0        | 0        | 0        | 0        | 0        | 0        | 0        | 0        | 0        | 0        | 2.90E-05 | 0        | 0        | 0        | 0        |
| 0.005605 | 0.004011 | 8.56E-04 | 0.001739 | 0.001022 | 0.003757 | 0.005125 | 0.003422 | 0.003007 | 0.001854 | 0.002534 | 0.001965 | 0.003446 | 0.004987 | 0.001669 |

| HC115    | HC122    | HC137    | HC003    | HC039    | HC128    | HC099    | HC092    | HC132    | HC090    | HC030    | HC005    | HC052    | HC067    | HC124    |
|----------|----------|----------|----------|----------|----------|----------|----------|----------|----------|----------|----------|----------|----------|----------|
| 0.454549 | 0.447017 | 0.440165 | 0.425543 | 0.424127 | 0.414444 | 0.405929 | 0.398522 | 0.395827 | 0.387848 | 0.368177 | 0.366512 | 0.358668 | 0.350808 | 0.345324 |
| 0.09109  | 0.055225 | 0.027493 | 0.015509 | 0.00463  | 0.002811 | 0.070282 | 0.012452 | 2.08E-04 | 0.28741  | 0.316961 | 0.035055 | 0.029691 | 0.002128 | 3.76E-04 |
| 0.119998 | 0.174702 | 0.108579 | 0.053133 | 0.099242 | 0.062625 | 0.041749 | 0.073783 | 0.054412 | 0.010294 | 0.073772 | 0.057415 | 0.179716 | 0.151006 | 0.148898 |
| 0.007185 | 0.060467 | 0.009419 | 0.100177 | 0.024321 | 0.060736 | 0.239241 | 0.064605 | 0.364199 | 0.018382 | 0.039487 | 0.098458 | 0.053775 | 0.025114 | 0.186607 |
| 0.005569 | 0.005506 | 0.024766 | 0.033722 | 0.002445 | 0.248386 | 0.047761 | 0.004839 | 5.93E-04 | 0.00695  | 0.026757 | 0.057673 | 0.026249 | 0.01101  | 0.017542 |
| 0.138648 | 0.04928  | 0.075369 | 0.003096 | 0.219002 | 3.73E-04 | 0.003388 | 0.006355 | 3.65E-04 | 0.080086 | 0.006315 | 0.01074  | 0.003086 | 0.197122 | 0.002569 |
| 0.004406 | 0.029808 | 0.00329  | 0.172849 | 4.94E-04 | 0.044448 | 0.029962 | 0.060534 | 0.05445  | 0.033726 | 0.009137 | 0.091035 | 0.029364 | 0.007032 | 0.108076 |
| 0.021882 | 0.048648 | 0.043318 | 0.07811  | 0.024312 | 0.009881 | 0.058293 | 0.098223 | 0.058367 | 0.019767 | 0.034532 | 0.102305 | 0.110315 | 0.086608 | 0.048396 |
| 0.023758 | 0.033621 | 0.132475 | 0.014898 | 0.031671 | 6.48E-04 | 0.008625 | 0.020633 | 4.18E-04 | 0.059258 | 0.035349 | 0.011256 | 0.04066  | 0.049568 | 0.001616 |
| 0.010567 | 0.001525 | 0.006771 | 0.005562 | 6.60E-04 | 0.053089 | 0.013447 | 0.02535  | 0.00266  | 0.009437 | 0.014113 | 0.024459 | 0.053689 | 0.007109 | 5.15E-04 |
| 0.008412 | 0.004728 | 0.002137 | 0.006503 | 3.54E-04 | 0.007634 | 0.002565 | 0.023741 | 0.009902 | 0.007951 | 0.005955 | 0.009496 | 0.017488 | 0.005288 | 0.024642 |
| 0.004765 | 0.009505 | 0.003593 | 0.013377 | 0.004542 | 0.018562 | 0.026484 | 0.005165 | 0.012357 | 0.010462 | 0.008917 | 0.010892 | 0.006808 | 0.005097 | 0.015875 |
| 0.004776 | 0.005892 | 0.007189 | 0.004437 | 0.008944 | 0.004249 | 0.005081 | 0.004859 | 5.64E-04 | 0.005036 | 0.003581 | 0.006887 | 0.004696 | 0.007217 | 0.00393  |
| 0        | 0        | 0        | 2.10E-04 | 1.05E-04 | 2.03E-04 | 0        | 0.002786 | 0        | 1.34E-04 | 0        | 0.001725 | 0        | 0        | 4.56E-04 |
| 0.002872 | 0.003825 | 0.005453 | 0.006512 | 0.009018 | 0.017259 | 0.002205 | 0.007031 | 2.26E-04 | 0.004508 | 0.013466 | 0.01322  | 0.005658 | 0.002479 | 0.004888 |
| 0.044947 | 0.007238 | 0.017069 | 0.011314 | 0.022078 | 0.003022 | 9.07E-04 | 0.031768 | 0.00246  | 0.015129 | 0.0052   | 0.019919 | 0.00446  | 0.022781 | 9.06E-04 |
| 4.86E-04 | 0.017161 | 0.018079 | 0.006497 | 0.007757 | 0.010652 | 0.004394 | 0.009445 | 0.002899 | 0.005736 | 0.00916  | 0.009425 | 0.008527 | 0.007475 | 0.005764 |
| 0.002305 | 0.004104 | 0.003182 | 0.002383 | 0.009882 | 0.003847 | 0.002829 | 0.006675 | 0.001511 | 0.001834 | 0.003575 | 0.007427 | 0.00781  | 0.004526 | 0.002717 |
| 6.66E-04 | 0.004744 | 4.46E-04 | 0.016881 | 1.06E-04 | 0.002572 | 0.009212 | 0.006494 | 0.008112 | 0.003985 | 0.001201 | 0.012463 | 0.00358  | 0.001165 | 0.009758 |
| 2.85E-04 | 2.50E-04 | 5.70E-04 | 0.002608 | 2.25E-04 | 0.003056 | 0.001537 | 0.001404 | 6.44E-04 | 6.14E-04 | 0.001501 | 0.003333 | 0.002532 | 0.001799 | 0.017385 |
| 0.004366 | 0.005961 | 0.005959 | 0.010534 | 0.002221 | 0.006357 | 0.00196  | 0.009131 | 0.00112  | 0.003686 | 0.004894 | 0.020263 | 0.012035 | 0.004156 | 0.002468 |
| 6.99E-04 | 6.20E-05 | 0.003033 | 1.24E-04 | 3.93E-04 | 7.80E-05 | 0        | 6.14E-04 | 3.30E-05 | 1.70E-05 | 2.58E-04 | 3.70E-04 | 2.72E-04 | 0.001637 | 4.20E-04 |
| 0.003369 | 0.004797 | 0.001081 | 0.003627 | 0.003024 | 0.00385  | 0.006049 | 0.003086 | 0.008037 | 0.001398 | 0.001204 | 0.003298 | 0.003798 | 0.001471 | 0.01238  |
| 0.002424 | 0        | 0.005457 | 0        | 3.60E-05 | 0        | 0        | 2.30E-05 | 0        | 0        | 0.004496 | 0        | 0.015207 | 0.004799 | 0        |
| 6.48E-04 | 7.22E-04 | 0.002683 | 0.001372 | 0.004749 | 0.002623 | 9.26E-04 | 0.001289 | 3.19E-04 | 0.001887 | 1.97E-04 | 0.00491  | 0.002377 | 0.005214 | 0.003316 |
| 0.001383 | 1.81E-04 | 4.06E-04 | 1.99E-04 | 0        | 0.001012 | 0.002311 | 4.82E-04 | 0        | 0.002697 | 0.001733 | 0.001299 | 3.70E-04 | 1.30E-04 | 2.50E-05 |
| 4.25E-04 | 0.001225 | 1.91E-04 | 0.00267  | 6.50E-05 | 0.002776 | 0.005958 | 0.003014 | 0.012573 | 0.001293 | 5.69E-04 | 0.00219  | 0.001792 | 4.67E-04 | 0.013659 |
| 0.012131 | 2.13E-04 | 0.006311 | 0.001002 | 0.003472 | 1.92E-04 | 2.84E-04 | 1.67E-04 | 6.60E-05 | 0.001691 | 0.001019 | 5.41E-04 | 3.72E-04 | 0.003903 | 6.72E-04 |
| 0.001326 | 7.72E-04 | 0.005269 | 0.001043 | 0.006649 | 3.58E-04 | 6.18E-04 | 0.009464 | 0.004584 | 0.001882 | 0.002325 | 0.003511 | 0.005946 | 0.004036 | 0.006629 |
| 0.002205 | 3.87E-04 | 0.00658  | 0        | 0.005341 | 3.80E-05 | 4.40E-05 | 4.63E-04 | 8.80E-05 | 1.60E-05 | 2.40E-05 | 1.76E-04 | 2.50E-05 | 0.02219  | 5.50E-05 |
| 8.00E-05 | 0.002299 | 0.003724 | 9.10E-04 | 5.69E-04 | 6.08E-04 | 0        | 0.008592 | 0        | 0.009025 | 4.42E-04 | 8.63E-04 | 0.001323 | 4.80E-05 | 2.10E-05 |
| 3.80E-04 | 2.20E-05 | 9.60E-05 | 1.13E-04 | 0        | 1.98E-04 | 9.36E-04 | 1.18E-04 | 0        | 0.001415 | 0.001165 | 3.30E-04 | 2.82E-04 | 0        | 0        |
| 0        | 0.013672 | 3.30E-05 | 1.68E-04 | 0        | 7.90E-05 | 8.90E-05 | 0.088299 | 4.70E-05 | 2.00E-05 | 2.23E-04 | 0.001121 | 2.02E-04 | 7.70E-05 | 1.11E-04 |
| 0.012418 | 7.08E-04 | 6.10E-04 | 2.28E-04 | 0.032382 | 4.60E-05 | 3.90E-05 | 4.81E-04 | 3.70E-05 | 3.40E-05 | 1.25E-04 | 4.40E-05 | 2.23E-04 | 4.67E-04 | 3.30E-05 |
| 0        | 9.70E-05 | 0.001885 | 8.50E-05 | 1.48E-04 | 0.002248 | 0        | 4.25E-04 | 0        | 0        | 1.18E-04 | 1.87E-04 | 7.95E-04 | 0.001068 | 0        |
| 0.001953 | 2.02E-04 | 3.13E-04 | 0        | 0.00485  | 0        | 7.10E-05 | 1.65E-04 | 7.10E-05 | 1.11E-04 | 1.61E-04 | 1.23E-04 | 9.10E-05 | 1.10E-04 | 2.30E-05 |
| 2.10E-05 | 1.51E-04 | 0.017871 | 1.52E-04 | 0.005642 | 1.16E-04 | 0        | 1.14E-04 | 0        | 6.50E-05 | 1.02E-04 | 1.67E-04 | 2.05E-04 | 4.02E-04 | 0        |
| 3.06E-04 | 2.00E-05 | 3.30E-05 | 3.30E-05 | 0        | 0        | 0        | 2.12E-04 | 0        | 6.50E-05 | 0        | 7.41E-04 | 4.13E-04 | 5.40E-05 | 0        |
| 0.002279 | 3.82E-04 | 0.002917 | 3.01E-04 | 0.005963 | 1.69E-04 | 0        | 9.35E-04 | 0        | 2.65E-04 | 8.50E-05 | 5.60E-04 | 2.12E-04 | 8.58E-04 | 8.80E-05 |
| 0.00192  | 2.90E-05 | 7.10E-05 | 0        | 0.016538 | 0        | 1.31E-04 | 1.02E-04 | 3.80E-05 | 3.72E-04 | 1.14E-04 | 8.10E-04 | 2.40E-05 | 0        | 4.46E-04 |
| 1.11E-04 | 2.09E-04 | 7.50E-05 | 4.35E-04 | 6.40E-05 | 9.37E-04 | 0.001394 | 1.99E-04 | 9.07E-04 | 2.21E-04 | 1.33E-04 | 6.66E-04 | 4.57E-04 | 5.87E-04 | 0.005468 |
| 0        | 4.50E-05 | 0        | 1.37E-04 | 0        | 0        | 0        | 2.18E-04 | 0        | 0        | 0        | 1.25E-04 | 0        | 0        | 0        |
| 9.80E-05 | 4.92E-04 | 0        | 2.31E-04 | 0        | 0.001186 | 6.24E-04 | 2.86E-04 | 0.001139 | 4.49E-04 | 3.50E-05 | 4.16E-04 | 2.90E-04 | 5.10E-05 | 0.001868 |
| 0        | 0        | 0        | 8.30E-05 | 0        | 4.80E-05 | 0        | 2.09E-04 | 0        | 1.90E-05 | 0        | 9.00E-05 | 0        | 0        | 1.20E-04 |
| 0        | 1.13E-04 | 1.06E-04 | 0        | 0        | 0        | 0        | 1.17E-04 | 0        | 0        | 0        | 0        | 1.37E-04 | 0        | 0        |
| 2.16E-04 | 6.40E-05 | 1.46E-04 | 0        | 3.30E-05 | 0        | 1.46E-04 | 1.70E-04 | 0        | 8.26E-04 | 0        | 0.001987 | 5.60E-05 | 5.30E-05 | 0        |
| 0        | 4.50E-05 | 0        | 4.00E-05 | 0        | 8.80E-05 | 0        | 2.77E-04 | 0        | 0        | 0        | 1.69E-04 | 0        | 0        | 8.40E-05 |
| 1.03E-04 | 1.95E-04 | 5.56E-04 | 3.70E-05 | 9.60E-04 | 1.39E-04 | 0        | 4.58E-04 | 0        | 8.50E-05 | 5.70E-05 | 0        | 1.83E-04 | 1.62E-04 | 0        |
| 1.03E-04 | 0        | 6.70E-05 | 0        | 2.50E-05 | 0        | 0        | 1.38E-04 | 0        | 7.30E-05 | 3.61E-04 | 4.40E-05 | 6.73E-04 | 1.95E-04 | 0        |
| 3.10E-05 | 2.72E-04 | 3.77E-04 | 2.62E-04 | 2.54E-04 | 9.39E-04 | 4.10E-05 | 1.96E-04 | 0        | 2.41E-04 | 4.80E-04 | 4.59E-04 | 1.85E-04 | 5.70E-05 | 9.30E-05 |
| 0        | 3.30E-05 | 0        | 9.50E-05 | 7.30E-05 | 0        | 0        | 8.90E-05 | 0        | 0        | 0        | 0        | 2.60E-05 | 2.60E-05 | 1.63E-04 |
| 1.77E-04 | 0        | 2.00E-04 | 0        | 6.80E-05 | 3.40E-05 | 0        | 5.20E-05 | 0        | 1.90E-05 | 6.40E-05 | 0        | 2.23E-04 | 9.10E-05 | 0        |
| 2.40E-05 | 1.86E-04 | 1.52E-04 | 8.10E-05 | 0        | 1.78E-04 | 7.10E-05 | 1.41E-04 | 0        | 2.20E-05 | 0        | 1.42E-04 | 2.60E-04 | 3.10E-05 | 1.19E-04 |
| 0        | 0        | 0        | 0        | 0        | 0        | 0        | 7.00E-05 | 0        | 0        | 2.54E-04 | 0        | 0        | 3.40E-05 | 0        |
| 0        | 0        | 0        | 0        | 0        | 0        | 0        | 0        | 0        | 0        | 0        | 0        | 0        | 0        | 0        |
| 0        | 0        | 0        | 0        | 0        | 0        | 0        | 3.00E-05 | 0        | 0        | 2.00E-05 | 0        | 0        | 0        | 0        |
| 0.003638 | 0.003198 | 0.004435 | 0.00283  | 0.012566 | 0.007206 | 0.004417 | 0.00551  | 7.67E-04 | 0.003559 | 0.002186 | 0.004703 | 0.004774 | 0.002294 | 0.005499 |

| HC051    | HC053    | HC009    | HC015    | HC144    | HC001    | HC031    | HC066    | HC111    | HC094    | HC011    | HC073    | HC055    | HC048    | HC107    |
|----------|----------|----------|----------|----------|----------|----------|----------|----------|----------|----------|----------|----------|----------|----------|
| 0.343205 | 0.338455 | 0.326442 | 0.325068 | 0.323613 | 0.321942 | 0.316282 | 0.309196 | 0.303485 | 0.303482 | 0.297192 | 0.295762 | 0.294527 | 0.293307 | 0.293055 |
| 0.238204 | 0.01909  | 0.017421 | 0.25132  | 0.033017 | 0.245551 | 0.286073 | 0.100256 | 0.119182 | 9.08E-04 | 0.071306 | 0.059625 | 0.128747 | 8.90E-04 | 5.96E-04 |
| 0.072377 | 0.116226 | 0.031331 | 0.096464 | 0.063881 | 0.039015 | 0.085226 | 0.122826 | 0.105276 | 0.106204 | 0.079172 | 0.07291  | 0.150078 | 0.100074 | 0.013943 |
| 0.080655 | 0.124119 | 0.014086 | 0.025525 | 0.091112 | 0.041922 | 0.01315  | 0.021205 | 0.045001 | 0.159504 | 0.044999 | 0.106026 | 0.053483 | 0.424637 | 0.202772 |
| 0.05279  | 0.004867 | 0.021085 | 0.028175 | 0.006201 | 0.078557 | 0.04052  | 0.04287  | 0.028669 | 0.006343 | 0.123864 | 0.030611 | 0.041819 | 5.58E-04 | 0.00686  |
| 0.00405  | 0.05263  | 0.01125  | 0.015983 | 0.013967 | 0.00478  | 0.007449 | 0.019079 | 0.049363 | 0.008001 | 0.04467  | 0.023036 | 0.024433 | 0.002093 | 0.038903 |
| 0.014446 | 0.053581 | 0.010996 | 0.024003 | 0.148455 | 0.036637 | 0.005619 | 0.015573 | 0.023237 | 0.097487 | 0.011564 | 0.073457 | 0.002713 | 0.016824 | 0.112594 |
| 0.017809 | 0.145015 | 0.026002 | 0.030199 | 0.137716 | 0.013846 | 0.021852 | 0.050763 | 0.03534  | 0.145226 | 0.032722 | 0.059573 | 0.019549 | 0.103067 | 0.132791 |
| 0.027219 | 0.008368 | 0.090405 | 0.083845 | 0.045811 | 0.03677  | 0.073392 | 0.131902 | 0.097646 | 0.006215 | 0.058729 | 0.096158 | 0.092736 | 0.001339 | 0.01498  |
| 0.048859 | 0.011408 | 0.017595 | 0.017778 | 0.012422 | 0.048028 | 0.026024 | 0.027763 | 0.042985 | 0.005696 | 0.06117  | 0.019773 | 0.055402 | 0.001982 | 0.001061 |
| 0.012042 | 0.006081 | 0.008026 | 0.005508 | 0.016438 | 0.007323 | 0.009949 | 0.006304 | 0.003415 | 0.027233 | 0.008243 | 0.01486  | 0.003937 | 0.002302 | 0.019276 |
| 0.017629 | 0.009091 | 9.55E-04 | 0.009062 | 0.011688 | 0.01311  | 0.007233 | 0.005562 | 0.011582 | 0.003181 | 0.004295 | 0.004791 | 0.010415 | 0.011194 | 0.010872 |
| 0.002453 | 0.008277 | 0.007062 | 0.007388 | 0.016884 | 0.007386 | 0.005133 | 0.009435 | 0.015175 | 0.003582 | 0.017798 | 0.004326 | 0.007281 | 0.00127  | 0.008315 |
| 0        | 0        | 0.254308 | 5.06E-04 | 8.91E-04 | 4.54E-04 | 0        | 0        | 0        | 0.026795 | 0        | 0.009713 | 0        | 3.31E-04 | 5.48E-04 |
| 0.010236 | 0.002983 | 0.020603 | 0.008026 | 0.002137 | 0.008135 | 0.0142   | 0.020585 | 0.011789 | 0.004053 | 0.019414 | 0.020576 | 0.013678 | 0.001235 | 0.021358 |
| 0.001944 | 0.019881 | 0.004889 | 0.005541 | 0.010434 | 0.010388 | 0.01468  | 0.005791 | 0.018411 | 0.034926 | 0.012003 | 0.015321 | 0.004325 | 0.015556 | 0.001618 |
| 0.008358 | 0.003923 | 0.020864 | 0.011201 | 0.00464  | 0.003293 | 0.016752 | 0.017986 | 0.008243 | 0.003653 | 0.010081 | 0.00874  | 0.01416  | 6.03E-04 | 0.020067 |
| 0.002705 | 0.007728 | 0.017425 | 0.005846 | 0.0058   | 0.003323 | 0.001457 | 0.018878 | 0.007263 | 0.004371 | 0.013974 | 0.007745 | 0.010236 | 0.001246 | 0.007718 |
| 9.86E-04 | 0.013372 | 7.50E-05 | 0.001441 | 0.020874 | 0.001802 | 3.63E-04 | 0.001689 | 0.002991 | 0.004541 | 2.99E-04 | 0.003277 | 2.77E-04 | 0.004203 | 0.022697 |
| 0.002095 | 0.00102  | 0.006146 | 0.002229 | 0.002162 | 0.001628 | 0.001684 | 0.002465 | 0.00179  | 0.002023 | 0.006824 | 0.010787 | 0.003923 | 0.001887 | 0.005606 |
| 0.005321 | 0.015649 | 0.006605 | 0.00554  | 0.008024 | 0.008609 | 0.005921 | 0.013139 | 0.014785 | 0.002479 | 0.006719 | 0.011344 | 0.005987 | 5.07E-04 | 0.015459 |
| 5.30E-05 | 1.76E-04 | 3.60E-04 | 0.003422 | 5.98E-04 | 0.001915 | 0.001355 | 2.20E-04 | 1.54E-04 | 6.87E-04 | 0.002138 | 5.88E-04 | 0.002875 | 4.61E-04 | 5.05E-04 |
| 0.004732 | 0.003021 | 2.69E-04 | 0.002442 | 0.005094 | 0.001755 | 0.001877 | 0.003002 | 0.003082 | 0.001791 | 0.001219 | 0.001171 | 0.002687 | 0.004739 | 0.005111 |
| 0.004018 | 0.005941 | 1.74E-04 | 0.003777 | 0        | 0        | 0.001753 | 0.007804 | 0.003635 | 0        | 0.028155 | 0.013994 | 0.002764 | 0        | 0        |
| 2.47E-04 | 0.002364 | 0.005961 | 0.002548 | 0.00231  | 2.10E-04 | 0.001457 | 0.006195 | 0.006873 | 0.001162 | 9.26E-04 | 0.003604 | 0.002402 | 1.14E-04 | 0.00303  |
| 0.008509 | 4.08E-04 | 7.70E-05 | 0.002892 | 6.05E-04 | 0.007096 | 0.003972 | 0.001596 | 0.003706 | 0        | 0.001289 | 4.80E-04 | 0.004805 | 2.40E-05 | 0        |
| 0.003386 | 0.001635 | 4.00E-05 | 6.25E-04 | 0.003717 | 0.001155 | 6.82E-04 | 5.34E-04 | 4.62E-04 | 0.002609 | 5.95E-04 | 0.001023 | 3.63E-04 | 0.002183 | 0.01166  |
| 5.07E-04 | 0.001903 | 8.73E-04 | 0.003906 | 4.28E-04 | 0.002422 | 0.011756 | 0.017659 | 0.001767 | 2.29E-04 | 3.92E-04 | 0.002647 | 0.013808 | 2.80E-04 | 6.38E-04 |
| 9.34E-04 | 0.014008 | 0.002122 | 0.003035 | 0.0029   | 6.52E-04 | 0.003264 | 0.003918 | 0.003894 | 0.015701 | 0.002205 | 0.005554 | 0.005004 | 0.002901 | 0.009488 |
| 1.01E-04 | 2.99E-04 | 1.82E-04 | 0.001075 | 8.50E-05 | 0        | 5.52E-04 | 1.02E-04 | 3.28E-04 | 8.80E-05 | 1.12E-04 | 5.06E-04 | 0.005946 | 2.85E-04 | 2.61E-04 |
| 0.002586 | 2.53E-04 | 0.001673 | 2.48E-04 | 3.94E-04 | 0.017045 | 0.002425 | 3.37E-04 | 0.015034 | 0.001069 | 0.012304 | 0.00354  | 9.68E-04 | 0        | 3.90E-05 |
| 0.004459 | 7.60E-05 | 4.28E-04 | 0.001445 | 2.29E-04 | 0.00356  | 0.002194 | 4.55E-04 | 0.001691 | 0        | 5.72E-04 | 9.20E-05 | 0.002731 | 0        | 0        |
| 2.90E-05 | 1.83E-04 | 0.001014 | 6.10E-05 | 1.16E-04 | 0.012073 | 0        | 0        | 4.50E-05 | 1.54E-04 | 7.20E-05 | 1.07E-04 | 0        | 3.65E-04 | 1.88E-04 |
| 2.78E-04 | 0.001735 | 2.70E-04 | 5.87E-04 | 2.38E-04 | 9.80E-05 | 9.90E-05 | 2.39E-04 | 0.001245 | 0.001346 | 2.14E-04 | 1.17E-04 | 0.003257 | 1.55E-04 | 8.79E-04 |
| 9.90E-05 | 8.20E-05 | 0.001379 | 0.00124  | 4.44E-04 | 8.61E-04 | 0.007058 | 7.87E-04 | 4.19E-04 | 8.66E-04 | 0.001915 | 0.001713 | 0.001975 | 2.70E-05 | 3.28E-04 |
| 5.00E-05 | 4.06E-04 | 5.05E-04 | 3.79E-04 | 3.50E-05 | 9.00E-05 | 4.73E-04 | 4.27E-04 | 1.19E-04 | 1.49E-04 | 2.44E-04 | 0        | 0.00137  | 0        | 2.69E-04 |
| 0        | 5.20E-05 | 3.30E-05 | 1.42E-04 | 3.88E-04 | 1.62E-04 | 1.62E-04 | 6.30E-04 | 4.04E-04 | 2.37E-04 | 0.002378 | 4.24E-04 | 0.002732 | 0        | 5.77E-04 |
| 4.23E-04 | 2.09E-04 | 3.47E-04 | 8.40E-05 | 7.40E-05 | 0.009255 | 4.50E-05 | 2.80E-05 | 2.37E-04 | 4.20E-05 | 4.50E-04 | 4.99E-04 | 0        | 1.10E-04 | 1.29E-04 |
| 1.92E-04 | 5.08E-04 | 7.42E-04 | 0.002039 | 7.34E-04 | 4.00E-04 | 0.001341 | 0.002499 | 0.002141 | 0.001091 | 0.001183 | 0.003803 | 2.55E-04 | 5.75E-04 | 0.001314 |
| 2.60E-05 | 3.24E-04 | 2.99E-04 | 2.22E-04 | 1.05E-04 | 3.80E-05 | 0        | 9.10E-05 | 0.001012 | 1.27E-04 | 5.30E-05 | 0        | 0        | 0        | 3.02E-04 |
| 3.55E-04 | 2.24E-04 | 7.40E-05 | 3.22E-04 | 4.81E-04 | 2.35E-04 | 3.61E-04 | 2.02E-04 | 2.09E-04 | 4.30E-05 | 4.07E-04 | 5.86E-04 | 4.90E-04 | 9.72E-04 | 0.001197 |
| 0        | 0        | 0.018708 | 3.00E-05 | 8.60E-05 | 0        | 0        | 0        | 0        | 0.00471  | 0        | 0.001237 | 0        | 3.10E-05 | 0        |
| 6.80E-04 | 5.00E-05 | 4.00E-05 | 7.10E-05 | 6.47E-04 | 3.18E-04 | 1.73E-04 | 1.18E-04 | 8.80E-05 | 3.19E-04 | 2.39E-04 | 2.64E-04 | 1.06E-04 | 8.50E-05 | 0.00093  |
| 0        | 0        | 0.018881 | 0        | 7.10E-05 | 0        | 0        | 0        | 0        | 0.001158 | 0        | 4.90E-04 | 0        | 0        | 1.01E-04 |
| 0        | 4.70E-05 | 5.90E-05 | 4.30E-05 | 7.30E-05 | 0        | 0        | 2.60E-05 | 3.70E-05 | 4.20E-05 | 9.10E-05 | 0        | 0        | 5.80E-05 | 0        |
| 1.30E-04 | 2.70E-05 | 4.20E-05 | 3.36E-04 | 7.90E-05 | 5.32E-04 | 6.58E-04 | 5.50E-05 | 7.70E-05 | 0        | 0        | 0        | 5.50E-05 | 2.20E-05 | 0        |
| 0        | 0        | 0.013468 | 1.01E-04 | 6.90E-05 | 0        | 0        | 0        | 0        | 0.001337 | 0        | 6.70E-04 | 0        | 0        | 4.80E-05 |
| 2.81E-04 | 1.43E-04 | 5.03E-04 | 2.28E-04 | 5.60E-05 | 2.37E-04 | 3.61E-04 | 8.55E-04 | 0.001047 | 2.26E-04 | 6.81E-04 | 4.13E-04 | 0.001178 | 0        | 3.33E-04 |
| 1.86E-04 | 3.12E-04 | 6.40E-05 | 3.50E-05 | 0        | 4.30E-05 | 2.80E-05 | 4.58E-04 | 2.48E-04 | 5.20E-05 | 0.005639 | 9.80E-05 | 1.26E-04 | 1.12E-04 | 0        |
| 1.70E-04 | 0        | 5.40E-05 | 2.59E-04 | 1.20E-05 | 1.15E-04 | 8.23E-04 | 0.001112 | 2.39E-04 | 3.60E-05 | 2.64E-04 | 1.46E-04 | 6.38E-04 | 0        | 0.001371 |
| 2.00E-05 | 0        | 0        | 0        | 2.00E-05 | 0        | 0        | 4.30E-05 | 4.60E-05 | 2.00E-05 | 3.00E-05 | 5.60E-05 | 0        | 0        | 0        |
| 3.00E-05 | 1.90E-05 | 6.39E-04 | 6.30E-05 | 0        | 2.23E-04 | 7.90E-05 | 7.30E-04 | 7.30E-05 | 5.10E-05 | 9.02E-04 | 1.10E-04 | 3.37E-04 | 0        | 4.40E-05 |
| 1.80E-05 | 4.50E-05 | 3.64E-04 | 9.40E-05 | 4.18E-04 | 3.20E-05 | 1.10E-04 | 9.90E-05 | 0        | 4.73E-04 | 3.57E-04 | 1.14E-04 | 0        | 8.00E-05 | 9.30E-05 |
| 0        | 2.10E-05 | 2.00E-05 | 1.18E-04 | 0        | 0        | 0        | 0        | 4.50E-05 | 0        | 0        | 1.18E-04 | 4.40E-05 | 0        | 0        |
| 0        | 0        | 5.10E-05 | 0        | 0        | 6.20E-05 | 0        | 0        | 0        | 0        | 0        | 0        | 0        | 0        | 0        |
| 0        | 0        | 1.21E-04 | 0        | 0        | 0        | 0        | 0        | 0        | 4.30E-05 | 0        | 0        | 0        | 0        | 0        |
| 0.004118 | 0.003765 | 0.016593 | 0.007483 | 0.003327 | 0.006917 | 0.003983 | 0.006512 | 0.006015 | 0.008239 | 0.009936 | 0.007425 | 0.005378 | 0.001316 | 0.010076 |

| HC033    | HC105    | HC136    | HC097    | HC080    | HC044    | HC017    | HC008    | HC116    | HC032    | HC081    | HC002    | HC114    | HC142    | HC146    |
|----------|----------|----------|----------|----------|----------|----------|----------|----------|----------|----------|----------|----------|----------|----------|
| 0.285431 | 0.282456 | 0.281837 | 0.274413 | 0.273541 | 0.270505 | 0.270448 | 0.261949 | 0.261137 | 0.258917 | 0.250023 | 0.249771 | 0.248738 | 0.244464 | 0.243483 |
| 0.032454 | 0.028191 | 0.239662 | 0.166037 | 0.090072 | 0.012223 | 0.156398 | 0.061896 | 0.484052 | 0.153367 | 0.107935 | 0.005497 | 0.093265 | 0.281065 | 0.127106 |
| 0.253653 | 0.106517 | 0.083522 | 0.060997 | 0.037071 | 0.036643 | 0.095593 | 0.144756 | 0.047909 | 0.115294 | 0.209775 | 0.097424 | 0.037154 | 0.102771 | 0.006378 |
| 0.012656 | 0.150231 | 0.008689 | 0.179817 | 0.018353 | 0.093101 | 0.030396 | 0.161823 | 0.02304  | 0.09603  | 0.049429 | 0.301293 | 0.003042 | 0.009412 | 0.010836 |
| 0.16141  | 0.008378 | 0.046254 | 0.046629 | 0.245092 | 0.008309 | 0.043938 | 0.006658 | 0.024874 | 0.006474 | 0.001215 | 0.002714 | 0.081598 | 0.038457 | 0.345786 |
| 0.041199 | 0.021557 | 0.095935 | 0.002784 | 0.008416 | 0.011294 | 0.078727 | 0.006393 | 0.003831 | 0.035967 | 0.125832 | 0.002139 | 0.027117 | 0.068579 | 0.018208 |
| 0.005804 | 0.091887 | 0.00327  | 0.045376 | 0.026608 | 0.138939 | 0.016    | 0.048235 | 0.025191 | 0.037738 | 0.049668 | 0.048506 | 0.011739 | 0.009117 | 0.026052 |
| 0.037694 | 0.080567 | 0.009433 | 0.013918 | 0.015324 | 0.087642 | 0.022347 | 0.032567 | 0.009517 | 0.053774 | 0.028747 | 0.171608 | 0.004322 | 0.012571 | 0.010568 |
| 0.020328 | 0.026974 | 0.123426 | 0.015502 | 0.08917  | 0.109516 | 0.125108 | 0.030077 | 0.035673 | 0.075112 | 0.009077 | 0.001677 | 0.249687 | 0.058995 | 0.093274 |
| 0.002809 | 0.049263 | 0.034952 | 0.060902 | 0.008497 | 0.00942  | 0.009024 | 0.057778 | 0.020498 | 0.045692 | 0.005963 | 0.002824 | 0.02598  | 0.02488  | 0.00165  |
| 0.004771 | 0.015862 | 0.004497 | 0.001675 | 0.001672 | 0.023303 | 0.012516 | 0.025325 | 0.003429 | 0.00819  | 0.004634 | 0.016192 | 7.12E-04 | 8.68E-04 | 8.19E-04 |
| 0.003502 | 0.021526 | 0.006559 | 0.018328 | 0.006436 | 0.002169 | 0.009454 | 0.002908 | 0.008777 | 0.004816 | 0.009422 | 0.019741 | 0.008624 | 0.009547 | 0.002111 |
| 0.004459 | 0.015513 | 0.003071 | 0.004593 | 0.007626 | 0.006271 | 0.006733 | 0.002796 | 0.00257  | 0.007693 | 0.031615 | 0.00376  | 0.010203 | 0.013884 | 0.011815 |
| 0        | 0.001806 | 0        | 2.60E-05 | 3.90E-05 | 0.068047 | 9.50E-05 | 0.038195 | 0        | 0        | 7.09E-04 | 9.48E-04 | 0        | 0        | 0        |
| 0.001681 | 0.011567 | 0.00565  | 0.029165 | 0.077767 | 0.006227 | 0.007097 | 0.005376 | 0.006364 | 0.009695 | 0.001931 | 0.004166 | 0.014191 | 0.008336 | 0.022326 |
| 5.07E-04 | 0.004643 | 0.006304 | 0.00227  | 0.008038 | 0.016057 | 0.002221 | 8.87E-04 | 0.001831 | 0.007635 | 0.017682 | 0.008774 | 0.003866 | 0.038154 | 0.005582 |
| 0.010143 | 0.008227 | 0.004845 | 0.030203 | 0.030907 | 0.012024 | 0.009474 | 0.008708 | 0.004667 | 0.007983 | 0.002853 | 0.00386  | 0.00513  | 0.003184 | 0.04983  |
| 0.003071 | 0.010372 | 0.00195  | 0.005696 | 0.01077  | 0.0156   | 0.006136 | 0.005003 | 0.004417 | 0.013127 | 0.015152 | 0.002282 | 0.003455 | 0.002895 | 0.001794 |
| 4.24E-04 | 0.01335  | 1.30E-04 | 0.001254 | 9.39E-04 | 0.004281 | 9.77E-04 | 0.001198 | 8.37E-04 | 0.002154 | 0.005037 | 0.013513 | 4.05E-04 | 8.27E-04 | 1.30E-04 |
| 0.001021 | 0.005638 | 3.64E-04 | 0.007941 | 0.001339 | 0.004095 | 0.004842 | 0.006204 | 0.002202 | 0.00425  | 2.89E-04 | 0.003926 | 0.001184 | 0.001408 | 2.40E-04 |
| 0.005239 | 0.007206 | 0.003296 | 0.001488 | 0.013419 | 0.00668  | 0.006152 | 0.008286 | 0.00347  | 0.009902 | 0.002427 | 0.0041   | 0.001894 | 0.005889 | 0.001344 |
| 0.016678 | 1.83E-04 | 0.001483 | 0.001195 | 2.13E-04 | 1.22E-04 | 0.003618 | 3.40E-04 | 4.03E-04 | 8.48E-04 | 0        | 2.91E-04 | 0.083625 | 0.013221 | 0.008536 |
| 0.002579 | 0.010342 | 0.001458 | 0.004434 | 0.001049 | 7.07E-04 | 0.003617 | 0.001532 | 0.001086 | 0.001364 | 0.006887 | 0.007385 | 0.001404 | 0.002489 | 2.20E-04 |
| 0.011263 | 0        | 0.002563 | 0        | 0        | 0        | 0.002437 | 3.44E-04 | 0.00258  | 0.013114 | 0        | 3.30E-05 | 8.20E-04 | 0        | 0        |
| 1.96E-04 | 0.005754 | 0.001087 | 0.001022 | 8.17E-04 | 0.001341 | 0.002235 | 0.001482 | 0.001365 | 8.99E-04 | 0.014021 | 7.31E-04 | 0.001269 | 0.004805 | 0.002603 |
| 8.30E-05 | 0.003327 | 0.007475 | 0.006127 | 5.70E-04 | 3.00E-05 | 0.001328 | 7.99E-04 | 0.005531 | 0.00185  | 0.001303 | 1.26E-04 | 0.001814 | 0.004966 | 1.56E-04 |
| 2.79E-04 | 0.005028 | 1.83E-04 | 9.90E-04 | 1.69E-04 | 9.68E-04 | 0.001424 | 0.002253 | 2.39E-04 | 7.68E-04 | 0.00107  | 0.010515 | 3.40E-05 | 1.86E-04 | 3.50E-05 |
| 0.006113 | 1.90E-04 | 0.003801 | 2.40E-04 | 2.65E-04 | 0.001321 | 0.007357 | 0.031687 | 0.002189 | 0.004486 | 6.30E-04 | 0.00186  | 0.009578 | 0.00237  | 4.10E-05 |
| 0.004432 | 0.001191 | 0.002411 | 2.29E-04 | 6.20E-05 | 8.20E-04 | 0.002832 | 0.006314 | 9.29E-04 | 0.00394  | 0.001877 | 0.004219 | 9.40E-04 | 0.001564 | 0        |
| 1.07E-04 | 7.75E-04 | 0.002436 | 8.70E-05 | 2.80E-05 | 9.10E-05 | 0.002823 | 0.004101 | 7.09E-04 | 0.002802 | 0.006276 | 0.001173 | 0        | 2.04E-04 | 0        |
| 0.06221  | 2.91E-04 | 9.04E-04 | 1.87E-04 | 0.004489 | 7.30E-05 | 0.016122 | 9.20E-05 | 0.001847 | 6.99E-04 | 0        | 1.27E-04 | 0.003682 | 0.003344 | 1.38E-04 |
| 3.40E-05 | 0.001384 | 0.002474 | 0.002856 | 1.64E-04 | 3.70E-05 | 9.60E-04 | 0        | 0.001936 | 9.34E-04 | 3.44E-04 | 7.20E-05 | 0.001864 | 0.001905 | 8.40E-05 |
| 0        | 1.76E-04 | 0        | 4.50E-05 | 7.20E-05 | 2.69E-04 | 0        | 3.25E-04 | 0        | 0.002018 | 0        | 1.45E-04 | 3.70E-05 | 4.40E-05 | 0        |
| 0.001957 | 3.24E-04 | 9.92E-04 | 3.56E-04 | 0        | 0.001048 | 0.004779 | 5.24E-04 | 2.89E-04 | 0.001667 | 0.0106   | 3.59E-04 | 0.002878 | 1.05E-04 | 1.56E-04 |
| 2.70E-05 | 0        | 8.40E-05 | 4.04E-04 | 0.008861 | 2.89E-04 | 4.68E-04 | 7.73E-04 | 0.001137 | 2.30E-05 | 0        | 2.41E-04 | 0.002159 | 0.00171  | 4.38E-04 |
| 3.80E-05 | 6.20E-05 | 6.56E-04 | 4.00E-05 | 3.88E-04 | 9.20E-05 | 0.001502 | 0.004743 | 3.79E-04 | 9.28E-04 | 6.03E-04 | 9.60E-05 | 0.002045 | 1.08E-04 | 4.32E-04 |
| 1.50E-05 | 0        | 0.001448 | 0.001636 | 0.001011 | 7.83E-04 | 0.019694 | 4.79E-04 | 0        | 1.06E-04 | 7.50E-05 | 1.61E-04 | 0.01028  | 0.014637 | 1.80E-04 |
| 1.19E-04 | 7.30E-05 | 0        | 1.49E-04 | 0        | 2.40E-05 | 0        | 0.001031 | 1.19E-04 | 9.40E-05 | 0        | 1.02E-04 | 2.79E-04 | 2.10E-04 | 0.001029 |
| 2.88E-04 | 2.35E-04 | 8.01E-04 | 9.30E-05 | 2.82E-04 | 0.001141 | 2.50E-04 | 5.07E-04 | 8.10E-04 | 8.44E-04 | 0.00155  | 1.03E-04 | 0.001107 | 0.002321 | 3.45E-04 |
| 3.00E-05 | 3.78E-04 | 3.32E-04 | 2.00E-05 | 0        | 2.90E-05 | 0.00113  | 4.81E-04 | 2.50E-05 | 5.48E-04 | 0.015133 | 1.94E-04 | 5.48E-04 | 6.39E-04 | 1.80E-05 |
| 2.48E-04 | 0.00141  | 6.60E-05 | 0.001058 | 8.80E-05 | 8.20E-05 | 6.26E-04 | 8.20E-05 | 2.18E-04 | 1.45E-04 | 2.16E-04 | 8.96E-04 | 3.26E-04 | 3.74E-04 | 0        |
| 0        | 1.81E-04 | 0        | 0        | 1.08E-04 | 0.016074 | 4.40E-05 | 0.002569 | 0        | 0        | 1.23E-04 | 1.40E-04 | 0        | 4.40E-05 | 1.20E-05 |
| 3.00E-05 | 0.001278 | 1.50E-05 | 4.51E-04 | 7.80E-05 | 6.20E-05 | 1.36E-04 | 1.51E-04 | 0        | 8.50E-05 | 2.13E-04 | 0.001655 | 0        | 0        | 0        |
| 0        | 0        | 0        | 3.00E-05 | 3.50E-05 | 0.008057 | 4.00E-05 | 0.001048 | 0        | 0        | 0        | 1.05E-04 | 0        | 3.60E-05 | 0        |
| 1.90E-05 | 0        | 0        | 2.00E-05 | 3.60E-05 | 3.48E-04 | 0        | 3.40E-05 | 0        | 0        | 0        | 2.20E-05 | 0        | 0        | 0        |
| 6.80E-05 | 1.13E-04 | 0.001404 | 5.30E-05 | 1.00E-04 | 0        | 5.93E-04 | 3.60E-05 | 2.70E-04 | 9.70E-05 | 4.12E-04 | 0        | 0.026412 | 8.46E-04 | 4.70E-05 |
| 0        | 5.40E-05 | 0        | 2.10E-05 | 0        | 0.007357 | 3.70E-05 | 0.001499 | 0        | 0        | 5.40E-05 | 9.10E-05 | 0        | 0        | 0        |
| 1.68E-04 | 2.30E-04 | 2.55E-04 | 5.99E-04 | 0.001117 | 1.79E-04 | 2.92E-04 | 3.86E-04 | 5.31E-04 | 2.98E-04 | 0        | 2.90E-05 | 0.001379 | 0        | 0.003043 |
| 1.30E-04 | 0        | 7.90E-05 | 0        | 0        | 3.70E-05 | 4.30E-05 | 4.01E-04 | 2.50E-05 | 0.001913 | 0        | 0        | 0        | 2.47E-04 | 0        |
| 8.20E-05 | 3.78E-04 | 1.16E-04 | 0.002366 | 0.003281 | 1.38E-04 | 2.48E-04 | 2.90E-05 | 6.10E-05 | 6.30E-05 | 1.66E-04 | 0        | 6.62E-04 | 2.56E-04 | 6.17E-04 |
| 0        | 0        | 2.10E-05 | 0        | 3.00E-05 | 0        | 0        | 0        | 0        | 0        | 0        | 2.14E-04 | 4.50E-05 | 0        | 0        |
| 3.20E-04 | 6.10E-05 | 7.90E-05 | 1.91E-04 | 8.10E-04 | 0        | 3.50E-05 | 1.60E-04 | 2.65E-04 | 3.66E-04 | 0        | 3.60E-05 | 5.49E-04 | 2.17E-04 | 5.80E-05 |
| 3.30E-05 | 0        | 1.14E-04 | 1.74E-04 | 7.60E-05 | 3.87E-04 | 7.93E-04 | 4.22E-04 | 0        | 4.30E-05 | 1.67E-04 | 7.50E-05 | 7.40E-05 | 6.80E-05 | 0        |
| 0        | 0        | 3.10E-05 | 0        | 0        | 2.10E-05 | 0        | 1.69E-04 | 0        | 3.80E-05 | 0        | 0        | 0        | 0        | 0        |
| 0        | 0        | 0        | 0        | 0        | 0        | 0        | 5.80E-05 | 0        | 0        | 0        | 0        | 0.001369 | 0        | 0        |
| 0        | 0        | 0        | 0        | 0        | 1.82E-04 | 0        | 3.90E-05 | 0        | 0        | 0        | 0        | 0        | 0        | 0        |
| 0.004198 | 0.004851 | 0.003586 | 0.005913 | 0.004705 | 0.015545 | 0.010803 | 0.01815  | 0.002538 | 0.00521  | 0.008865 | 0.004089 | 0.012515 | 0.007781 | 0.00248  |

| HC074    | HC035    | HC085    | HC117    | HC075    | HC065    | HC138    | HC019    | HC010    | HC147    | HC134    | HC145    | HC109    | HC077    | HC007    |
|----------|----------|----------|----------|----------|----------|----------|----------|----------|----------|----------|----------|----------|----------|----------|
| 0.239719 | 0.238996 | 0.225626 | 0.222168 | 0.218653 | 0.215609 | 0.213204 | 0.209415 | 0.204478 | 0.198302 | 0.196506 | 0.190929 | 0.189258 | 0.189036 | 0.186847 |
| 0.149444 | 0.042329 | 0.002901 | 0.028512 | 0.144115 | 0.173801 | 0.06095  | 0.001897 | 0.225927 | 0.0447   | 0.063122 | 0.01874  | 0.590905 | 0.681109 | 0.433802 |
| 0.074626 | 0.082373 | 0.044448 | 0.083421 | 0.126131 | 0.064224 | 0.043198 | 0.017034 | 0.039936 | 0.098737 | 0.061729 | 0.021824 | 0.103059 | 0.021594 | 0.074256 |
| 0.047859 | 0.075202 | 0.284494 | 0.026998 | 0.081906 | 0.099931 | 0.012949 | 0.118495 | 0.058848 | 0.023746 | 0.097169 | 0.147504 | 0.017426 | 0.012366 | 0.011068 |
| 0.212457 | 0.033699 | 0.007959 | 0.030721 | 0.022815 | 0.03155  | 0.267212 | 0.005462 | 0.065657 | 0.320029 | 0.050852 | 0.04013  | 0.021071 | 0.008625 | 0.053337 |
| 0.006495 | 0.024618 | 0.006038 | 0.288051 | 0.06755  | 0.007923 | 0.019701 | 0.01204  | 0.01784  | 0.010157 | 0.010134 | 0.002921 | 0.003126 | 0.002166 | 0.022631 |
| 0.065242 | 0.114877 | 0.078326 | 0.002817 | 0.041678 | 0.087429 | 0.020095 | 0.303771 | 0.056002 | 0.014644 | 0.126138 | 0.273494 | 0.005947 | 0.027351 | 0.00467  |
| 0.017544 | 0.088524 | 0.124122 | 0.054079 | 0.076095 | 0.085313 | 0.01422  | 0.082625 | 0.029267 | 0.012531 | 0.055612 | 0.124663 | 0.011817 | 0.001632 | 0.034451 |
| 0.027208 | 0.080604 | 0.023837 | 0.050656 | 0.048366 | 0.015667 | 0.134214 | 0.070217 | 0.072027 | 0.166424 | 0.025365 | 0.022262 | 0.002094 | 0.013773 | 0.047642 |
| 0.059229 | 0.038567 | 0.052761 | 0.004507 | 0.014402 | 0.044659 | 0.070106 | 0.001829 | 0.032693 | 0.022653 | 0.105094 | 0.006965 | 0.004263 | 0.005296 | 0.020205 |
| 0.006779 | 0.017649 | 0.015785 | 0.001267 | 0.017433 | 0.036715 | 0.004971 | 0.005939 | 0.038317 | 0.003539 | 0.064037 | 0.022711 | 7.96E-04 | 7.93E-04 | 0.004219 |
| 0.016074 | 0.011217 | 0.009659 | 0.004931 | 0.00552  | 0.008635 | 0.012787 | 0.001007 | 0.006626 | 0.012256 | 0.005115 | 0.017709 | 0.01406  | 0.011304 | 0.005562 |
| 0.006021 | 0.013452 | 0.015187 | 0.016401 | 0.005919 | 0.004228 | 0.010292 | 0.008391 | 0.017126 | 0.003356 | 0.002689 | 0.005713 | 0.001683 | 0.002246 | 0.005791 |
| 1.01E-04 | 0        | 0.002365 | 0        | 0.008487 | 0        | 0        | 3.73E-04 | 0        | 7.30E-05 | 0        | 2.05E-04 | 6.00E-05 | 0        | 0        |
| 0.004287 | 0.010676 | 0.013215 | 0.004815 | 0.005034 | 0.0092   | 0.015656 | 0.018162 | 0.013719 | 0.009508 | 0.016116 | 0.007405 | 0.005479 | 0.001542 | 0.006859 |
| 0.003722 | 0.02298  | 0.005372 | 0.015276 | 0.023737 | 0.015571 | 0.013615 | 0.015412 | 0.008711 | 0.006193 | 0.007274 | 0.003793 | 0.001278 | 0.001763 | 0.004148 |
| 0.003776 | 0.01362  | 0.012231 | 0.009009 | 0.008465 | 0.011827 | 0.010492 | 0.050342 | 0.010164 | 0.010805 | 0.002962 | 0.009566 | 0.005756 | 0.001816 | 0.011355 |
| 0.00567  | 0.012872 | 0.018801 | 0.010247 | 0.008596 | 0.003888 | 0.002801 | 0.018053 | 0.018652 | 0.00515  | 0.003104 | 0.002723 | 0.001583 | 7.78E-04 | 0.002324 |
| 0.002565 | 0.011755 | 0.006367 | 6.61E-04 | 0.002299 | 0.006266 | 0.001067 | 0.002737 | 0.001564 | 0.001014 | 0.004598 | 0.025982 | 6.25E-04 | 3.26E-04 | 4.10E-04 |
| 0.00316  | 0.007914 | 0.010131 | 2.56E-04 | 0.003936 | 0.00204  | 0.007896 | 0.007474 | 0.001203 | 0.004453 | 0.008565 | 0.006465 | 1.01E-04 | 4.95E-04 | 0.001186 |
| 0.004491 | 0.008959 | 0.007122 | 0.013242 | 0.00822  | 0.014731 | 0.004743 | 0.007161 | 0.012603 | 0.00307  | 0.003407 | 0.004142 | 0.002963 | 8.59E-04 | 0.006222 |
| 1.76E-04 | 0.001162 | 2.47E-04 | 0.001438 | 0.004269 | 7.58E-04 | 0.005128 | 0.001503 | 1.48E-04 | 3.88E-04 | 0.003123 | 1.58E-04 | 8.40E-05 | 0.001028 | 0.00396  |
| 0.003548 | 0.004589 | 0.004626 | 0.001164 | 0.002296 | 0.003018 | 0.001462 | 3.25E-04 | 0.001864 | 0.001696 | 0.001696 | 0.005013 | 0.00215  | 0.001202 | 0.001241 |
| 0        | 0.012895 | 0        | 0.004215 | 0        | 0.021679 | 0.004953 | 0        | 0.031138 | 0        | 0.039555 | 0        | 0        | 0        | 0.00265  |
| 0.001503 | 0.004599 | 0.008912 | 0.008491 | 0.001553 | 8.60E-05 | 0.001556 | 2.72E-04 | 0.003096 | 0.009151 | 6.08E-04 | 7.55E-04 | 3.88E-04 | 0.001133 | 8.91E-04 |
| 0.007604 | 0.00169  | 2.83E-04 | 3.33E-04 | 0.001161 | 0.00266  | 0.002741 | 2.30E-05 | 0.00188  | 0.00207  | 0.001578 | 5.08E-04 | 0.002504 | 0.004439 | 0.003482 |
| 0.001639 | 0.003159 | 0.00626  | 6.00E-05 | 0.001915 | 0.005307 | 3.21E-04 | 4.76E-04 | 0.002702 | 4.92E-04 | 0.004069 | 0.007808 | 1.43E-04 | 3.10E-05 | 2.58E-04 |
| 6.17E-04 | 0.001824 | 3.04E-04 | 0.026553 | 0.002826 | 0.00203  | 0.001923 | 9.60E-05 | 3.47E-04 | 5.89E-04 | 0.006199 | 3.84E-04 | 6.37E-04 | 7.20E-05 | 0.020767 |
| 8.41E-04 | 0.004838 | 0.00278  | 0.006786 | 0.013071 | 0.002491 | 9.45E-04 | 2.18E-04 | 0.003185 | 1.59E-04 | 0.002346 | 8.02E-04 | 1.89E-04 | 3.60E-05 | 0.003112 |
| 3.40E-05 | 8.20E-05 | 4.50E-05 | 0.016547 | 0.001461 | 3.16E-04 | 0        | 0        | 2.67E-04 | 1.70E-05 | 6.15E-04 | 0        | 0.002137 | 0        | 0.003087 |
| 0.016238 | 0.003469 | 8.27E-04 | 0.003924 | 0.001545 | 1.50E-04 | 0.011992 | 0.014743 | 0.004562 | 0.001405 | 0.002072 | 5.28E-04 | 1.32E-04 | 3.13E-04 | 0.008913 |
| 0.002383 | 4.40E-04 | 2.00E-05 | 3.30E-05 | 8.43E-04 | 0.001281 | 0.001943 | 0        | 7.71E-04 | 6.52E-04 | 5.71E-04 | 1.17E-04 | 6.84E-04 | 0.002878 | 0.002893 |
| 1.58E-04 | 5.20E-05 | 2.80E-05 | 0        | 0.013841 | 0.010816 | 0        | 5.83E-04 | 0.003803 | 0        | 1.93E-04 | 0.013208 | 0.003693 | 6.70E-05 | 0        |
| 7.20E-05 | 2.61E-04 | 1.19E-04 | 0.004148 | 3.34E-04 | 1.37E-04 | 3.40E-05 | 0.00283  | 1.04E-04 | 1.38E-04 | 3.48E-04 | 4.20E-05 | 9.80E-05 | 7.60E-05 | 9.71E-04 |
| 5.34E-04 | 0        | 4.73E-04 | 0.002162 | 2.45E-04 | 2.30E-04 | 0.011661 | 2.30E-05 | 4.57E-04 | 0.002902 | 6.10E-04 | 7.93E-04 | 2.41E-04 | 7.70E-05 | 0.001664 |
| 0        | 1.32E-04 | 4.20E-05 | 4.09E-04 | 1.30E-04 | 3.91E-04 | 6.70E-05 | 2.55E-04 | 1.26E-04 | 6.20E-05 | 2.04E-04 | 0        | 8.40E-05 | 3.90E-05 | 0.001123 |
| 2.57E-04 | 0.001099 | 2.30E-05 | 0.025186 | 9.06E-04 | 6.30E-05 | 5.96E-04 | 5.57E-04 | 6.39E-04 | 2.99E-04 | 4.53E-04 | 4.02E-04 | 4.18E-04 | 7.20E-05 | 8.17E-04 |
| 4.69E-04 | 0        | 8.80E-05 | 0        | 4.40E-05 | 3.88E-04 | 0        | 1.35E-04 | 1.01E-04 | 7.30E-05 | 0.00134  | 0        | 4.80E-05 | 6.07E-04 | 5.40E-05 |
| 4.02E-04 | 8.23E-04 | 3.30E-04 | 0.002985 | 0.002851 | 2.62E-04 | 0.002045 | 0.001021 | 0.001451 | 0.001083 | 1.82E-04 | 2.12E-04 | 3.47E-04 | 0        | 0.001976 |
| 3.70E-05 | 0        | 0.001385 | 0.006516 | 0.001194 | 2.40E-05 | 0        | 3.60E-05 | 1.40E-04 | 2.00E-05 | 2.11E-04 | 9.20E-05 | 2.21E-04 | 2.90E-05 | 2.98E-04 |
| 5.21E-04 | 9.71E-04 | 0.001935 | 0        | 3.38E-04 | 2.08E-04 | 8.08E-04 | 6.00E-05 | 3.03E-04 | 0.001103 | 3.06E-04 | 0.001082 | 4.00E-05 | 2.54E-04 | 2.24E-04 |
| 3.40E-05 | 0        | 6.70E-05 | 0        | 0.001233 | 0        | 0        | 4.22E-04 | 0        | 5.30E-05 | 0        | 4.90E-05 | 0        | 0        | 0        |
| 3.00E-05 | 5.30E-04 | 5.68E-04 | 0        | 3.17E-04 | 4.46E-04 | 3.10E-05 | 8.60E-05 | 2.60E-04 | 1.60E-04 | 9.07E-04 | 0.001792 | 4.40E-05 | 4.60E-05 | 0        |
| 3.00E-05 | 0        | 1.67E-04 | 0        | 4.49E-04 | 0        | 0        | 0.001198 | 0        | 0        | 0        | 1.62E-04 | 0        | 0        | 0        |
| 6.40E-05 | 5.30E-05 | 0        | 0.001561 | 0        | 4.80E-05 | 0        | 2.50E-05 | 6.40E-05 | 0        | 8.90E-05 | 0        | 0        | 0        | 0        |
| 2.37E-04 | 2.20E-05 | 0        | 2.15E-04 | 1.36E-04 | 3.76E-04 | 3.50E-05 | 0        | 1.48E-04 | 4.70E-05 | 8.03E-04 | 5.30E-05 | 9.70E-05 | 0.001024 | 3.01E-04 |
| 0        | 0        | 2.51E-04 | 0        | 5.52E-04 | 0        | 0        | 6.43E-04 | 0        | 0        | 0        | 1.16E-04 | 0        | 0        | 0        |
| 3.70E-05 | 5.00E-04 | 2.42E-04 | 3.00E-04 | 3.92E-04 | 2.40E-05 | 3.49E-04 | 8.66E-04 | 2.29E-04 | 1.73E-04 | 1.26E-04 | 3.89E-04 | 8.80E-05 | 8.50E-05 | 4.82E-04 |
| 0        | 2.83E-04 | 0        | 2.55E-04 | 5.30E-05 | 0.002172 | 1.61E-04 | 5.00E-05 | 0.00432  | 0        | 0.010171 | 0        | 0        | 0        | 9.10E-05 |
| 1.17E-04 | 3.27E-04 | 3.09E-04 | 3.42E-04 | 5.80E-05 | 1.15E-04 | 6.70E-04 | 1.21E-04 | 2.29E-04 | 6.03E-04 | 2.60E-05 | 0        | 4.39E-04 | 2.90E-05 | 3.12E-04 |
| 6.80E-05 | 2.60E-05 | 0        | 0        | 0        | 4.30E-05 | 2.50E-05 | 0        | 5.60E-05 | 0        | 2.20E-04 | 0        | 0        | 0        | 0        |
| 3.22E-04 | 1.09E-04 | 6.10E-05 | 6.70E-05 | 1.44E-04 | 4.00E-05 | 0.001231 | 0        | 5.77E-04 | 4.40E-05 | 3.31E-04 | 1.02E-04 | 0        | 7.20E-05 | 4.30E-05 |
| 1.81E-04 | 3.40E-05 | 0        | 0.011302 | 4.77E-04 | 2.32E-04 | 4.40E-05 | 3.40E-05 | 1.05E-04 | 0        | 4.57E-04 | 0        | 5.10E-05 | 0        | 9.60E-05 |
| 0        | 3.40E-05 | 2.20E-05 | 0        | 2.30E-05 | 1.21E-04 | 0        | 0        | 3.80E-05 | 0        | 5.10E-05 | 0        | 0        | 0        | 0        |
| 0        | 0        | 0        | 0        | 0        | 0        | 3.20E-05 | 0        | 0        | 0        | 0        | 0        | 0        | 1.49E-04 | 5.00E-05 |
| 0        | 0        | 0        | 0        | 0        | 0        | 0        | 0        | 1.70E-05 | 0        | 5.00E-05 | 0        | 0        | 0        | 0        |
| 0.005378 | 0.005114 | 0.002839 | 0.006973 | 0.005986 | 0.004881 | 0.009078 | 0.015563 | 0.005513 | 0.005281 | 0.010902 | 0.009587 | 0.001693 | 0.001372 | 0.003259 |

| HC038    | HC042    | HC093    | HC034    | HC014    | HC060    | HC041    | HC016    | HC096    | HC040    | HC133    | HC120    | HC023    | HC140    | HC059    |
|----------|----------|----------|----------|----------|----------|----------|----------|----------|----------|----------|----------|----------|----------|----------|
| 0.18478  | 0.17813  | 0.17122  | 0.170806 | 0.169059 | 0.16644  | 0.165359 | 0.160803 | 0.154875 | 0.147075 | 0.145913 | 0.144482 | 0.143703 | 0.141138 | 0.140437 |
| 0.120143 | 0.001089 | 0.107621 | 0.010208 | 0.001799 | 0.015163 | 0.067049 | 0.298947 | 0.273914 | 0.086594 | 0.285133 | 0.109144 | 0.284465 | 0.023416 | 0.007174 |
| 0.049418 | 0.024939 | 0.029999 | 0.061033 | 0.174817 | 0.423361 | 0.103194 | 0.057818 | 0.058601 | 0.005801 | 0.053763 | 0.037195 | 0.116886 | 0.070411 | 0.030856 |
| 0.084208 | 0.064472 | 0.106921 | 0.067753 | 0.221871 | 0.048911 | 0.08434  | 0.095714 | 0.034822 | 0.041575 | 0.012032 | 0.030848 | 0.054715 | 0.024563 | 0.053523 |
| 0.013926 | 8.91E-04 | 0.008558 | 0.003978 | 0.002878 | 0.043316 | 0.38443  | 0.131031 | 0.071546 | 0.346135 | 0.009941 | 0.280164 | 0.157564 | 0.234417 | 0.006939 |
| 0.004272 | 0.030685 | 0.089696 | 9.49E-04 | 0.017827 | 0.024039 | 0.002752 | 0.006197 | 0.010598 | 0.005514 | 0.06666  | 0.009171 | 0.007022 | 0.022691 | 0.024785 |
| 0.009353 | 0.18893  | 0.050481 | 0.08196  | 0.105336 | 0.00272  | 0.049924 | 0.0252   | 0.02505  | 0.018042 | 0.017678 | 0.032068 | 0.013764 | 0.084368 | 0.052947 |
| 0.078649 | 0.399608 | 0.101267 | 0.108426 | 0.091628 | 0.031897 | 0.01039  | 0.008247 | 0.006692 | 0.002744 | 0.038242 | 0.009807 | 0.018854 | 0.054344 | 0.059174 |
| 0.1343   | 0.00458  | 0.169404 | 0.027456 | 0.019447 | 0.040763 | 0.023181 | 0.03296  | 0.065835 | 0.242194 | 0.056875 | 0.132205 | 0.039739 | 0.188957 | 0.040022 |
| 0.172775 | 0.001277 | 0.020866 | 0.110619 | 8.36E-04 | 0.020204 | 0.030834 | 0.090263 | 0.177672 | 0.004612 | 0.160029 | 0.078078 | 0.037803 | 0.032789 | 0.024957 |
| 0.004162 | 0.01054  | 0.004742 | 0.019881 | 0.0202   | 0.011329 | 0.005885 | 0.011927 | 0.004809 | 0.000649 | 0.004527 | 0.010913 | 0.003954 | 0.018229 | 0.032449 |
| 0.026837 | 0.006371 | 0.00306  | 0.002571 | 0.003411 | 0.009259 | 0.01788  | 0.019641 | 0.014554 | 0.005392 | 0.005094 | 0.018881 | 0.016508 | 0.012816 | 0.001421 |
| 0.018978 | 0.011313 | 0.006988 | 0.003849 | 0.005898 | 0.016435 | 0.006447 | 0.008227 | 0.008421 | 0.007304 | 0.026852 | 0.010818 | 0.008207 | 0.001747 | 0.007395 |
| 3.31E-04 | 2.94E-04 | 6.11E-04 | 0        | 0.015784 | 1.59E-04 | 0        | 0        | 8.20E-05 | 0        | 0        | 3.70E-05 | 3.06E-04 | 0        | 0.394659 |
| 0.013311 | 4.38E-04 | 0.014425 | 0.009657 | 0.001144 | 0.010192 | 0.014933 | 0.004131 | 0.014925 | 0.014116 | 0.014657 | 0.017048 | 0.007055 | 0.006296 | 0.005699 |
| 0.001557 | 0.001878 | 0.010149 | 0.002369 | 0.015848 | 0.059865 | 6.01E-04 | 0.001652 | 0.001746 | 0.008414 | 7.67E-04 | 6.00E-04 | 7.01E-04 | 0.006978 | 0.002918 |
| 0.016753 | 6.00E-05 | 0.041115 | 0.006291 | 0.005571 | 0.010584 | 0.0017   | 0.001816 | 0.003997 | 0.018021 | 0.003959 | 0.017435 | 0.006172 | 0.002543 | 0.004832 |
| 0.009978 | 0.00475  | 0.028935 | 0.01081  | 0.010719 | 0.006535 | 0.005628 | 0.001455 | 0.002345 | 0.002811 | 0.008485 | 0.001489 | 0.018579 | 0.003645 | 0.006596 |
| 0.002207 | 0.056495 | 0.002163 | 0.004595 | 0.005831 | 4.30E-04 | 0.001679 | 7.16E-04 | 6.42E-04 | 8.80E-05 | 0.001292 | 0.001336 | 0.001256 | 0.006661 | 5.71E-04 |
| 0.010417 | 3.13E-04 | 0.001403 | 0.003589 | 0.00209  | 8.65E-04 | 0.001364 | 0.001379 | 0.00282  | 0.001486 | 0.001303 | 0.010225 | 0.007694 | 0.014082 | 0.003636 |
| 0.002087 | 5.21E-04 | 0.001466 | 0.004601 | 0.011283 | 0.004006 | 0.002943 | 0.002856 | 0.00352  | 0.003498 | 0.003576 | 0.006623 | 0.011016 | 0.005102 | 0.005705 |
| 4.32E-04 | 6.88E-04 | 0.004307 | 3.25E-04 | 8.35E-04 | 0.002032 | 6.80E-04 | 0.001665 | 0.006187 | 8.41E-04 | 0.003194 | 0.002694 | 0.001729 | 0.003046 | 2.46E-04 |
| 0.006189 | 0.00202  | 3.39E-04 | 5.64E-04 | 0.002202 | 0.012576 | 0.004346 | 0.002635 | 0.002083 | 5.73E-04 | 8.09E-04 | 0.002441 | 0.003557 | 0.001666 | 3.16E-04 |
| 0        | 0        | 0        | 0.140978 | 0.040974 | 0        | 0        | 0.003971 | 0        | 0        | 0.033821 | 0        | 0        | 0.012793 | 9.10E-05 |
| 4.35E-04 | 2.77E-04 | 3.57E-04 | 0.001337 | 0.003508 | 0.003601 | 5.69E-04 | 2.39E-04 | 8.31E-04 | 0.00163  | 7.19E-04 | 0.002232 | 0.005796 | 0.003977 | 0.002485 |
| 0.012927 | 2.60E-05 | 5.27E-04 | 1.15E-04 | 4.10E-05 | 0.001429 | 0.002682 | 0.010475 | 0.019391 | 7.77E-04 | 0.010617 | 0.008605 | 0.007956 | 9.95E-04 | 4.30E-05 |
| 0.001953 | 0.002362 | 4.11E-04 | 9.07E-04 | 0.003084 | 0.001897 | 0.002295 | 0.002714 | 5.00E-04 | 1.76E-04 | 1.08E-04 | 0.001548 | 6.82E-04 | 0.001276 | 7.95E-04 |
| 7.36E-04 | 0.002204 | 1.54E-04 | 0.042863 | 4.10E-05 | 0.004854 | 5.43E-04 | 0.004076 | 0.002013 | 5.79E-04 | 3.61E-04 | 0.001037 | 9.17E-04 | 2.05E-04 | 5.60E-04 |
| 8.96E-04 | 0.001125 | 1.26E-04 | 0.005484 | 0.013895 | 0.003848 | 5.60E-05 | 2.46E-04 | 2.39E-04 | 0        | 0.001034 | 1.79E-04 | 0.001442 | 0.001784 | 0.001759 |
| 0        | 3.40E-05 | 0        | 9.21E-04 | 0.009438 | 1.27E-04 | 0        | 1.20E-04 | 0        | 0        | 0        | 0        | 0.001685 | 5.10E-05 | 4.90E-05 |
| 2.30E-05 | 3.50E-05 | 2.57E-04 | 5.83E-04 | 2.40E-04 | 1.90E-04 | 0        | 2.34E-04 | 0.004337 | 0.023687 | 0.001472 | 0.001852 | 0.001767 | 0.001028 | 9.90E-05 |
| 0.007617 | 0        | 3.57E-04 | 1.26E-04 | 0        | 3.93E-04 | 7.08E-04 | 0.004798 | 0.011775 | 3.48E-04 | 0.004713 | 0.00404  | 0.003738 | 2.44E-04 | 3.40E-04 |
| 1.40E-05 | 1.07E-04 | 0.001311 | 0.071296 | 4.24E-04 | 2.70E-05 | 0        | 0        | 2.80E-05 | 1.00E-04 | 2.50E-05 | 5.20E-05 | 0        | 1.44E-04 | 6.30E-05 |
| 2.60E-05 | 5.89E-04 | 0.001788 | 1.50E-04 | 0.002189 | 0.001498 | 6.80E-05 | 7.50E-05 | 4.20E-05 | 3.60E-05 | 2.60E-05 | 0        | 1.30E-04 | 6.00E-05 | 2.22E-04 |
| 1.30E-05 | 0        | 3.07E-04 | 9.50E-04 | 2.01E-04 | 3.96E-04 | 0        | 0.001129 | 0.003632 | 0.001498 | 0.002617 | 0.0043   | 0.00388  | 0.004833 | 5.40E-05 |
| 2.20E-05 | 3.62E-04 | 6.00E-04 | 0.001839 | 1.32E-04 | 6.20E-05 | 1.80E-04 | 0        | 2.50E-05 | 6.20E-05 | 0        | 4.40E-05 | 3.90E-05 | 6.30E-05 | 6.50E-05 |
| 1.10E-04 | 2.25E-04 | 3.94E-04 | 0        | 2.98E-04 | 0.001254 | 6.40E-05 | 4.32E-04 | 2.81E-04 | 0.001002 | 0.007298 | 7.55E-04 | 0.001565 | 8.45E-04 | 2.30E-04 |
| 3.63E-04 | 2.16E-04 | 0.001069 | 1.84E-04 | 4.10E-05 | 1.65E-04 | 2.43E-04 | 3.10E-04 | 3.39E-04 | 1.70E-04 | 7.77E-04 | 2.74E-04 | 0        | 1.15E-04 | 2.76E-04 |
| 2.70E-05 | 1.80E-04 | 2.91E-04 | 1.09E-04 | 2.50E-04 | 0.003734 | 1.74E-04 | 2.00E-04 | 1.41E-04 | 4.56E-04 | 3.77E-04 | 2.16E-04 | 5.33E-04 | 8.00E-04 | 4.38E-04 |
| 0        | 0        | 6.23E-04 | 3.40E-05 | 0        | 0.002738 | 0        | 4.50E-05 | 0        | 2.40E-05 | 0        | 0        | 0        | 0        | 0.001156 |
| 0.001817 | 2.35E-04 | 0        | 1.25E-04 | 1.50E-04 | 0.001165 | 7.08E-04 | 1.54E-04 | 3.85E-04 | 8.90E-05 | 5.60E-05 | 0.001376 | 0.001596 | 0.0013   | 9.00E-05 |
| 3.40E-05 | 1.19E-04 | 0.00178  | 0        | 0.001182 | 2.30E-05 | 0        | 0        | 0        | 0        | 0        | 4.00E-05 | 1.03E-04 | 0        | 0.025801 |
| 6.54E-04 | 3.80E-04 | 4.50E-05 | 1.39E-04 | 2.47E-04 | 4.69E-04 | 5.32E-04 | 0.001016 | 1.82E-04 | 5.70E-05 | 0        | 5.61E-04 | 2.34E-04 | 3.43E-04 | 7.00E-05 |
| 0        | 1.30E-05 | 9.24E-04 | 0        | 4.28E-04 | 0        | 0        | 0        | 0        | 0        | 0        | 0        | 0        | 0        | 0.024241 |
| 3.70E-05 | 2.60E-05 | 2.60E-05 | 9.00E-05 | 2.03E-04 | 1.78E-04 | 0        | 0        | 0        | 0        | 8.40E-05 | 0        | 0        | 2.10E-05 | 0        |
| 1.09E-04 | 0        | 1.27E-04 | 0        | 0        | 0        | 9.90E-05 | 1.59E-04 | 0.004151 | 1.50E-05 | 4.33E-04 | 9.30E-05 | 1.06E-04 | 2.11E-04 | 0        |
| 2.80E-05 | 3.80E-05 | 0.00103  | 0        | 6.36E-04 | 0        | 0        | 0        | 0        | 0        | 0        | 0        | 2.50E-05 | 0        | 0.016373 |
| 8.50E-05 | 2.20E-05 | 0.00182  | 3.17E-04 | 3.40E-05 | 1.08E-04 | 3.20E-05 | 7.40E-05 | 1.46E-04 | 3.95E-04 | 0.001636 | 4.47E-04 | 9.80E-05 | 9.90E-05 | 1.84E-04 |
| 3.50E-05 | 1.90E-05 | 1.57E-04 | 0.012537 | 3.80E-05 | 0        | 0        | 6.90E-05 | 0        | 0        | 0.002179 | 0        | 0        | 4.62E-04 | 7.90E-05 |
| 0.001286 | 0        | 4.32E-04 | 6.40E-05 | 4.50E-05 | 4.34E-04 | 1.29E-04 | 0        | 2.42E-04 | 6.51E-04 | 1.69E-04 | 9.46E-04 | 1.34E-04 | 7.90E-05 | 2.30E-05 |
| 0        | 2.10E-05 | 0        | 3.50E-05 | 0        | 0        | 6.10E-05 | 0        | 0        | 0        | 0        | 3.90E-05 | 0        | 7.03E-04 | 0        |
| 2.50E-05 | 0        | 6.80E-04 | 2.34E-04 | 0        | 2.28E-04 | 0        | 2.64E-04 | 2.63E-04 | 3.35E-04 | 0.001451 | 9.30E-05 | 2.12E-04 | 1.12E-04 | 1.76E-04 |
| 1.80E-05 | 4.70E-05 | 1.04E-04 | 1.44E-04 | 0.0061   | 2.50E-04 | 0        | 6.90E-05 | 4.00E-05 | 0        | 0        | 0        | 0        | 2.44E-04 | 2.90E-05 |
| 6.40E-05 | 0        | 5.50E-05 | 0        | 0        | 3.20E-05 | 0        | 0        | 0        | 0        | 0        | 4.50E-05 | 0        | 0        | 0        |
| 0        | 0        | 0        | 1.12E-04 | 0        | 0        | 0        | 0        | 0        | 0        | 0        | 7.50E-05 | 0        | 0        | 0        |
| 0        | 0        | 3.00E-05 | 0        | 0        | 0        | 0        | 0        | 0        | 0        | 0        | 0        | 0        | 0        | 0        |
| 0.005583 | 0.001056 | 0.008482 | 0.006037 | 0.009867 | 0.009819 | 0.005318 | 0.003851 | 0.005281 | 0.004434 | 0.009246 | 0.007449 | 0.006113 | 0.007308 | 0.016952 |

| HC129    | HC029    | HC149    | HC076    | HC022    | HC131    | HC079    | HC012    | HC086    | HC098    | HC070    | HC106    | HC113    | HC021    | HC049    |
|----------|----------|----------|----------|----------|----------|----------|----------|----------|----------|----------|----------|----------|----------|----------|
| 0.13749  | 0.130264 | 0.123414 | 0.122978 | 0.122265 | 0.114286 | 0.113771 | 0.110217 | 0.109469 | 0.107799 | 0.107394 | 0.096835 | 0.093422 | 0.092625 | 0.084656 |
| 0.327325 | 0.07455  | 0.673674 | 0.69406  | 0.337412 | 0.02925  | 0.099571 | 0.262731 | 0.059481 | 0.004773 | 0.168955 | 0.046598 | 0.044376 | 0.019611 | 0.289058 |
| 0.074438 | 0.166025 | 0.021613 | 0.016259 | 0.079698 | 0.142507 | 0.075679 | 0.051642 | 0.058122 | 0.052719 | 0.047932 | 0.13494  | 0.051074 | 0.271959 | 0.035387 |
| 0.137402 | 0.097471 | 0.028159 | 0.010412 | 0.060197 | 0.131667 | 0.131207 | 0.032825 | 0.081839 | 0.037131 | 0.066524 | 0.100282 | 0.154667 | 0.250467 | 0.053709 |
| 0.019715 | 0.055725 | 0.040546 | 0.02999  | 0.037453 | 0.030189 | 0.081863 | 0.18539  | 0.383334 | 0.254665 | 0.113475 | 0.256311 | 0.02859  | 0.017961 | 0.164291 |
| 0.023196 | 0.013555 | 0.003119 | 0.006543 | 0.002679 | 0.006626 | 0.003244 | 0.010754 | 0.002442 | 0.011715 | 0.012412 | 0.00197  | 0.090816 | 0.005959 | 0.003436 |
| 0.106012 | 0.027492 | 0.010309 | 0.003373 | 0.12001  | 0.248286 | 0.006615 | 0.062637 | 0.043083 | 0.003016 | 0.049932 | 0.083516 | 0.053703 | 0.068648 | 0.020052 |
| 0.025736 | 0.033249 | 0.005576 | 0.003488 | 0.055077 | 0.055146 | 0.012169 | 0.031418 | 0.033117 | 0.006428 | 0.056071 | 0.018303 | 0.058533 | 0.026563 | 0.021822 |
| 0.01128  | 0.21833  | 0.018994 | 0.056403 | 0.028118 | 0.0265   | 0.108774 | 0.092517 | 0.035403 | 0.376815 | 0.059479 | 0.030045 | 0.097821 | 0.049293 | 0.102202 |
| 0.009842 | 0.037043 | 0.007493 | 0.009586 | 0.029019 | 0.001737 | 0.214631 | 0.042325 | 0.068934 | 0.043491 | 0.187162 | 0.089626 | 0.162443 | 0.042056 | 0.052565 |
| 0.005106 | 0.003724 | 0.002061 | 9.07E-04 | 0.032241 | 0.041315 | 0.003153 | 0.015149 | 0.016029 | 0.002232 | 0.018281 | 0.020655 | 0.019512 | 0.013563 | 0.023022 |
| 0.051805 | 0.013858 | 0.019419 | 0.008277 | 0.02366  | 0.017231 | 0.026951 | 0.008869 | 0.02383  | 0.016847 | 0.004521 | 0.027733 | 0.005247 | 0.014709 | 0.028259 |
| 0.00362  | 0.013012 | 0.001562 | 0.004473 | 0.004602 | 0.012899 | 0.007388 | 0.007055 | 0.006859 | 0.008378 | 0.014278 | 0.005359 | 0.007502 | 0.003915 | 0.00934  |
| 3.20E-05 | 3.82E-04 | 0        | 0        | 2.18E-04 | 0.001441 | 6.20E-05 | 0        | 2.53E-04 | 0        | 0        | 6.40E-05 | 0        | 2.53E-04 | 1.33E-04 |
| 0.007935 | 0.029234 | 0.001391 | 0.002697 | 0.002714 | 0.013603 | 0.008996 | 0.006197 | 0.020556 | 0.007665 | 0.007748 | 0.005526 | 0.015958 | 0.015068 | 0.022883 |
| 0.012484 | 0.005837 | 3.91E-04 | 0.002316 | 3.67E-04 | 0.001653 | 0.001341 | 0.006705 | 0.005455 | 0.004771 | 0.001218 | 0.002557 | 0.002575 | 0.017598 | 0.006552 |
| 0.004456 | 0.004997 | 0.002475 | 0.004377 | 0.003334 | 0.00884  | 0.004089 | 0.008174 | 0.003293 | 4.05E-04 | 0.004416 | 0.002725 | 0.004334 | 0.012596 | 0.004773 |
| 0.002274 | 0.018055 | 5.89E-04 | 0.001703 | 0.004625 | 0.012106 | 0.004462 | 0.006909 | 0.006443 | 0.008485 | 0.006736 | 0.010595 | 0.015922 | 0.004307 | 0.002422 |
| 0.009993 | 0.001704 | 9.97E-04 | 9.40E-05 | 0.013161 | 0.017711 | 1.26E-04 | 0.002672 | 0.003888 | 0        | 0.001745 | 0.003317 | 0.002031 | 0.004029 | 0.0021   |
| 0.00189  | 0.0087   | 7.21E-04 | 1.37E-04 | 0.002442 | 0.00754  | 0.008768 | 0.00943  | 0.002737 | 0.005589 | 0.010513 | 0.00515  | 0.009846 | 0.014931 | 0.00674  |
| 0.003953 | 0.005472 | 0.003387 | 0.00156  | 0.011595 | 0.011746 | 0.003372 | 0.00478  | 0.007353 | 0.002201 | 0.008302 | 0.001452 | 0.002793 | 0.007884 | 0.005114 |
| 1.81E-04 | 0.001862 | 3.20E-04 | 0.001227 | 6.80E-05 | 0.008139 | 0.007065 | 0.001164 | 5.49E-04 | 0.007182 | 0.00322  | 3.98E-04 | 9.70E-04 | 7.88E-04 | 0.004577 |
| 0.006559 | 0.006187 | 0.001617 | 5.57E-04 | 0.007743 | 0.008431 | 0.004329 | 0.001488 | 0.003555 | 0.002656 | 4.99E-04 | 0.010034 | 5.76E-04 | 0.010151 | 0.004875 |
| 0        | 0        | 0        | 0        | 0        | 0        | 0        | 0.008392 | 0        | 0        | 0.018595 | 0        | 0.039916 | 0        | 0        |
| 6.65E-04 | 0.003689 | 0.001251 | 8.23E-04 | 0.001713 | 0.024545 | 0.001656 | 0.003562 | 9.56E-04 | 0.013818 | 0.001659 | 0.008636 | 0.009883 | 0.001444 | 7.49E-04 |
| 0.002344 | 0.004106 | 0.00648  | 0.005981 | 0.005731 | 1.09E-04 | 0.018005 | 0.003914 | 0.0052   | 7.44E-04 | 0.0033   | 0.00472  | 0.001774 | 0.001309 | 0.008731 |
| 0.002994 | 8.97E-04 | 6.94E-04 | 1.79E-04 | 0.007247 | 0.005695 | 0.001562 | 9.75E-04 | 0.003804 | 5.46E-04 | 7.52E-04 | 0.005898 | 0.001903 | 0.004453 | 0.004246 |
| 0.001042 | 4.84E-04 | 4.53E-04 | 4.76E-04 | 3.61E-04 | 1.98E-04 | 0.016061 | 8.56E-04 | 4.35E-04 | 1.52E-04 | 0.00161  | 3.00E-05 | 6.67E-04 | 7.67E-04 | 7.53E-04 |
| 0.002141 | 0.00217  | 2.14E-04 | 4.50E-05 | 6.70E-04 | 0.00105  | 4.42E-04 | 0.001567 | 5.20E-04 | 8.50E-05 | 0.001013 | 9.11E-04 | 0.002143 | 0.004484 | 3.90E-04 |
| 3.60E-05 | 9.69E-04 | 1.64E-04 | 0        | 2.80E-05 | 0        | 4.50E-05 | 0        | 0        | 0        | 0        | 5.90E-05 | 5.50E-05 | 8.13E-04 | 0        |
| 2.49E-04 | 0.003321 | 0.001182 | 0.001189 | 0        | 8.10E-05 | 0.00572  | 0.007963 | 0.001868 | 0.003287 | 3.04E-04 | 0.004305 | 0.001241 | 0.005785 | 0.008629 |
| 0.001292 | 9.83E-04 | 0.012449 | 0.003182 | 5.39E-04 | 1.17E-04 | 0.005113 | 0.002154 | 0.001707 | 2.21E-04 | 0.001907 | 0.001948 | 9.07E-04 | 2.80E-04 | 0.008008 |
| 3.20E-05 | 4.50E-05 | 3.10E-05 | 0        | 0        | 5.50E-05 | 0        | 3.10E-05 | 9.40E-05 | 0        | 0        | 3.68E-04 | 0        | 1.02E-04 | 6.90E-05 |
| 3.57E-04 | 0.001919 | 0        | 4.06E-04 | 4.40E-05 | 3.80E-05 | 3.67E-04 | 4.28E-04 | 4.70E-05 | 1.78E-04 | 8.90E-05 | 8.60E-05 | 4.70E-05 | 0        | 5.30E-05 |
| 2.90E-05 | 4.16E-04 | 5.10E-04 | 4.67E-04 | 2.95E-04 | 0        | 0.011866 | 8.65E-04 | 9.80E-05 | 0.005436 | 0.00773  | 0.00517  | 3.86E-04 | 0.003058 | 0.003866 |
| 0        | 3.13E-04 | 3.90E-05 | 4.63E-04 | 2.39E-04 | 0        | 3.63E-04 | 1.32E-04 | 3.50E-05 | 3.30E-05 | 1.20E-04 | 6.70E-05 | 7.80E-05 | 6.80E-05 | 0        |
| 9.80E-05 | 0.001807 | 7.34E-04 | 0.003479 | 0        | 2.99E-04 | 0.001068 | 6.47E-04 | 1.86E-04 | 0.001468 | 2.41E-04 | 5.10E-05 | 1.69E-04 | 1.03E-04 | 5.90E-05 |
| 7.00E-05 | 8.01E-04 | 0        | 5.50E-05 | 0        | 1.64E-04 | 5.80E-05 | 3.72E-04 | 3.70E-05 | 2.31E-04 | 1.32E-04 | 2.38E-04 | 1.51E-04 | 2.90E-05 | 2.44E-04 |
| 1.55E-04 | 4.20E-04 | 9.50E-05 | 1.88E-04 | 1.75E-04 | 8.40E-05 | 5.85E-04 | 4.95E-04 | 3.57E-04 | 3.07E-04 | 2.62E-04 | 4.10E-04 | 8.64E-04 | 3.59E-04 | 1.28E-04 |
| 8.15E-04 | 8.00E-05 | 3.70E-05 | 8.60E-05 | 3.10E-05 | 0        | 5.10E-05 | 2.60E-05 | 0        | 0        | 0        | 6.00E-05 | 1.08E-04 | 3.50E-05 | 0        |
| 8.09E-04 | 0.002026 | 2.25E-04 | 0        | 8.34E-04 | 0.00232  | 0.002415 | 8.21E-04 | 8.74E-04 | 8.97E-04 | 3.39E-04 | 0.00174  | 4.22E-04 | 0.002698 | 0.002625 |
| 0        | 1.09E-04 | 4.30E-05 | 0        | 2.80E-05 | 1.87E-04 | 0        | 0        | 3.50E-05 | 0        | 0        | 0        | 0        | 3.30E-05 | 0        |
| 3.53E-04 | 1.69E-04 | 4.60E-04 | 4.30E-05 | 6.57E-04 | 0.003664 | 7.42E-04 | 1.71E-04 | 9.31E-04 | 2.07E-04 | 2.18E-04 | 8.87E-04 | 4.49E-04 | 0.00105  | 0.003392 |
| 0        | 1.09E-04 | 0        | 0        | 0        | 1.05E-04 | 0        | 0        | 3.20E-05 | 0        | 0        | 0        | 0        | 3.60E-05 | 0        |
| 0        | 0        | 0        | 0        | 0        | 0        | 0        | 1.27E-04 | 0        | 0        | 0        | 0        | 0        | 2.70E-05 | 0        |
| 2.95E-04 | 2.73E-04 | 7.25E-04 | 1.32E-04 | 3.20E-05 | 3.10E-05 | 1.19E-04 | 2.40E-04 | 1.66E-04 | 3.40E-05 | 2.05E-04 | 0.000649 | 0        | 6.80E-05 | 3.04E-04 |
| 0        | 3.10E-05 | 0        | 0        | 0        | 1.33E-04 | 0        | 0        | 3.00E-05 | 0        | 0        | 2.50E-05 | 0        | 3.70E-05 | 0        |
| 3.60E-05 | 2.75E-04 | 0        | 2.60E-05 | 4.20E-05 | 5.95E-04 | 2.44E-04 | 2.20E-04 | 3.90E-05 | 3.30E-05 | 2.94E-04 | 0        | 0.001047 | 0        | 0        |
| 0        | 0        | 0        | 0        | 0        | 0        | 0        | 4.67E-04 | 0        | 0        | 0.004073 | 2.80E-05 | 0.005115 | 0        | 0        |
| 3.27E-04 | 6.63E-04 | 7.20E-05 | 8.60E-05 | 2.40E-05 | 4.64E-04 | 2.66E-04 | 1.47E-04 | 2.25E-04 | 6.90E-05 | 6.30E-05 | 1.35E-04 | 6.90E-05 | 6.39E-04 | 4.47E-04 |
| 0        | 0        | 0        | 0        | 0        | 5.60E-05 | 0        | 6.50E-05 | 7.00E-05 | 2.26E-04 | 0        | 6.10E-05 | 2.90E-05 | 1.33E-04 | 0        |
| 3.10E-05 | 5.40E-05 | 0        | 3.80E-05 | 0        | 2.25E-04 | 5.80E-05 | 8.50E-05 | 3.60E-05 | 1.98E-04 | 3.37E-04 | 5.00E-05 | 0.001075 | 6.60E-05 | 2.26E-04 |
| 0        | 9.50E-05 | 6.10E-05 | 0        | 0        | 0        | 1.36E-04 | 2.00E-05 | 0        | 0        | 2.60E-05 | 1.68E-04 | 4.60E-05 | 4.25E-04 | 0        |
| 0        | 0        | 0        | 0        | 0        | 0        | 0        | 0        | 0        | 0        | 5.00E-05 | 0        | 0        | 0        | 0        |
| 0        | 0        | 0.003649 | 0        | 0        | 0        | 0        | 4.70E-05 | 0        | 3.50E-05 | 0        | 0        | 0        | 0.001661 | 0        |
| 0        | 0        | 0        | 0        | 0        | 0        | 0        | 0        | 0        | 0        | 0        | 6.10E-05 | 0        | 0        | 0        |
| 0.003106 | 0.007048 | 0.002605 | 0.001239 | 0.002612 | 0.010936 | 0.005305 | 0.00429  | 0.006194 | 0.006832 | 0.005868 | 0.009248 | 0.008745 | 0.005104 | 0.009113 |

| HC072    | HC004    | HC102    | HC125    | HC068    | HC143    | HC057    | HC071    | HC018    | HC148    | HC088    | HC027    | HC063    | HC084    | HC026    |
|----------|----------|----------|----------|----------|----------|----------|----------|----------|----------|----------|----------|----------|----------|----------|
| 0.080356 | 0.080205 | 0.080134 | 0.079    | 0.078866 | 0.076858 | 0.07679  | 0.076498 | 0.075548 | 0.072072 | 0.071666 | 0.071218 | 0.070909 | 0.069959 | 0.069372 |
| 0.111679 | 0.026691 | 0.140208 | 0.650344 | 0.406874 | 0.128556 | 0.140546 | 0.373088 | 0.186669 | 0.61033  | 0.169964 | 0.012146 | 0.077684 | 0.004963 | 0.48601  |
| 0.090966 | 0.147202 | 0.083564 | 0.134316 | 0.054258 | 0.087072 | 0.013785 | 0.039578 | 0.052301 | 0.003377 | 0.068792 | 0.226174 | 0.040163 | 0.040076 | 0.094381 |
| 0.044603 | 0.17273  | 0.158122 | 0.006186 | 0.00751  | 0.157076 | 0.006025 | 0.042437 | 0.051794 | 0.009264 | 0.047572 | 0.311051 | 0.159344 | 0.202884 | 0.014453 |
| 0.299    | 0.20846  | 0.189191 | 0.008206 | 0.033439 | 0.036908 | 0.389021 | 0.202773 | 0.119919 | 0.094707 | 0.092478 | 0.036788 | 0.03842  | 0.029687 | 0.081125 |
| 0.018183 | 0.005795 | 0.007511 | 0.003041 | 0.057552 | 0.020668 | 0.001836 | 0.003258 | 0.04558  | 0.010198 | 0.056665 | 7.38E-04 | 0.002412 | 0.001214 | 0.005395 |
| 0.026552 | 0.113319 | 0.048548 | 0.003905 | 0.003785 | 0.063879 | 0.005454 | 0.056444 | 0.057507 | 0.002534 | 0.027492 | 0.048531 | 0.14778  | 0.109036 | 0.00649  |
| 0.02834  | 0.050463 | 0.039349 | 0.007802 | 0.011285 | 0.062218 | 0.003234 | 0.012116 | 0.051736 | 0.003327 | 0.044039 | 0.020762 | 0.18064  | 0.317363 | 0.004391 |
| 0.025354 | 0.046235 | 0.012867 | 0.061853 | 0.172575 | 0.028892 | 0.261039 | 0.052594 | 0.116564 | 0.114179 | 0.088012 | 0.004444 | 0.031006 | 0.005742 | 0.086651 |
| 0.031722 | 0.024289 | 0.090484 | 0.002318 | 0.046313 | 0.162478 | 0.01481  | 0.020916 | 0.104356 | 0.018899 | 0.10015  | 0.142443 | 0.010805 | 0.064184 | 0.05705  |
| 0.008245 | 0.019962 | 0.020555 | 7.75E-04 | 0.003869 | 0.027298 | 6.53E-04 | 0.005821 | 0.018073 | 8.75E-04 | 0.014564 | 0.006922 | 0.050852 | 0.018903 | 0.005532 |
| 0.005774 | 0.022054 | 0.033304 | 0.0065   | 0.005882 | 0.002822 | 0.010156 | 0.014196 | 0.005472 | 0.006152 | 0.003638 | 0.028032 | 0.026937 | 0.016005 | 0.014051 |
| 0.021876 | 0.009013 | 0.004947 | 0.005063 | 0.012457 | 0.007968 | 0.012258 | 0.004824 | 0.010132 | 0.005484 | 0.010682 | 0.007062 | 0.005419 | 0.00547  | 0.006704 |
| 0.002359 | 1.53E-04 | 2.19E-04 | 0        | 0        | 0.023327 | 0        | 0        | 9.98E-04 | 0        | 0        | 1.10E-04 | 4.88E-04 | 0.005476 | 2.08E-04 |
| 0.023323 | 0.008284 | 0.006827 | 0.001657 | 0.006699 | 0.009113 | 0.01799  | 0.021009 | 0.008258 | 0.007248 | 0.012521 | 0.003591 | 0.011696 | 0.011245 | 0.010783 |
| 0.006831 | 0.002139 | 0.00658  | 0.003422 | 0.008536 | 0.011835 | 0.002796 | 0.003833 | 0.004248 | 0.006142 | 0.01203  | 0.005556 | 0.007972 | 0.004838 | 0.001678 |
| 0.022369 | 0.006465 | 0.007434 | 0.00309  | 0.003627 | 0.004668 | 0.006441 | 0.007124 | 0.010116 | 0.006852 | 0.004816 | 0.004705 | 0.013064 | 0.00673  | 0.004995 |
| 0.024006 | 0.002623 | 0.007167 | 0.001722 | 0.003175 | 0.008374 | 0.004163 | 0.002031 | 0.007189 | 0.004458 | 0.011489 | 0.008749 | 0.004527 | 0.017286 | 0.002564 |
| 5.83E-04 | 0.007916 | 0.004545 | 3.73E-04 | 7.80E-05 | 7.35E-04 | 8.90E-05 | 0.002005 | 0.002165 | 3.10E-05 | 7.49E-04 | 0.003513 | 0.033613 | 0.024416 | 1.74E-04 |
| 0.016369 | 0.007951 | 0.002619 | 1.11E-04 | 0.001034 | 0.006726 | 0.001674 | 0.008896 | 0.017052 | 0.001106 | 0.017771 | 0.009694 | 0.011079 | 0.012735 | 8.82E-04 |
| 0.007412 | 0.00336  | 0.003882 | 0.00307  | 0.011975 | 0.006078 | 0.001146 | 0.010051 | 0.012483 | 8.63E-04 | 0.00226  | 7.23E-04 | 0.018472 | 0.003212 | 0.001201 |
| 0.007937 | 4.01E-04 | 1.85E-04 | 4.31E-04 | 0.03173  | 0.006596 | 0.001702 | 0.001283 | 0.008071 | 0.004237 | 0.041136 | 1.04E-04 | 0.002586 | 6.60E-05 | 8.25E-04 |
| 0.001927 | 0.007571 | 0.007188 | 0.002563 | 7.41E-04 | 5.91E-04 | 6.42E-04 | 0.001814 | 0.001075 | 2.48E-04 | 3.66E-04 | 0.015353 | 0.0098   | 0.002937 | 0.002969 |
| 0.014585 | 0        | 0        | 0        | 0.004494 | 8.70E-05 | 0        | 0.001605 | 0        | 0        | 0.021067 | 0        | 4.50E-05 | 0        | 0        |
| 0.001391 | 1.96E-04 | 9.25E-04 | 0.002089 | 0.002722 | 7.43E-04 | 6.25E-04 | 0.001272 | 0.003103 | 0.002494 | 0.001616 | 0.003015 | 2.58E-04 | 0.00506  | 9.55E-04 |
| 0.001222 | 0.001758 | 0.011341 | 0.002297 | 0.006732 | 0.002817 | 0.002542 | 0.002834 | 0.005632 | 0.006886 | 0.002037 | 0.004315 | 0.002101 | 2.38E-04 | 0.021214 |
| 2.84E-04 | 0.007321 | 0.010204 | 2.80E-05 | 1.97E-04 | 0.001352 | 7.50E-05 | 8.00E-04 | 0.00131  | 6.10E-05 | 4.41E-04 | 0.008673 | 0.014763 | 0.006567 | 5.40E-04 |
| 0.002201 | 4.71E-04 | 4.47E-04 | 6.35E-04 | 0.001841 | 3.25E-04 | 1.90E-04 | 0.003183 | 0.001409 | 6.58E-04 | 0.010891 | 0        | 7.24E-04 | 1.20E-04 | 0        |
| 0.003143 | 0        | 0.001075 | 0.001038 | 9.68E-04 | 0.001858 | 0        | 9.06E-04 | 0.001713 | 0        | 9.62E-04 | 5.33E-04 | 0.002096 | 0.001165 | 2.47E-04 |
| 0        | 0        | 6.30E-05 | 0.002108 | 0        | 0        | 0        | 4.80E-05 | 3.91E-04 | 0        | 1.53E-04 | 5.00E-05 | 1.26E-04 | 0        | 0        |
| 0.011504 | 0.002862 | 0.001469 | 2.28E-04 | 9.13E-04 | 0.00262  | 0.010565 | 0.00198  | 4.47E-04 | 0        | 0.01439  | 4.20E-05 | 6.59E-04 | 1.21E-04 | 5.83E-04 |
| 8.94E-04 | 7.45E-04 | 0.005569 | 0.001177 | 0.002931 | 7.52E-04 | 9.55E-04 | 0.002178 | 0.00102  | 0.003444 | 0.001383 | 0.00159  | 0.001089 | 2.71E-04 | 0.010928 |
| 1.05E-04 | 1.48E-04 | 0        | 0        | 4.10E-05 | 0.005792 | 2.30E-05 | 6.10E-05 | 1.89E-04 | 0        | 6.60E-05 | 0        | 0.004587 | 3.20E-04 | 0        |
| 0.002143 | 0        | 2.16E-04 | 9.60E-05 | 5.91E-04 | 3.30E-05 | 0        | 1.40E-04 | 6.11E-04 | 0        | 0.00233  | 0        | 9.50E-05 | 1.48E-04 | 1.74E-04 |
| 0.007084 | 0.001758 | 7.73E-04 | 4.97E-04 | 0.001217 | 0.001287 | 0.005144 | 0.00951  | 4.22E-04 | 0.001278 | 0.005742 | 1.06E-04 | 5.10E-04 | 6.50E-05 | 7.50E-04 |
| 8.30E-04 | 2.70E-05 | 0        | 3.30E-05 | 4.67E-04 | 7.00E-05 | 2.40E-05 | 3.58E-04 | 4.63E-04 | 0        | 0.003428 | 5.50E-05 | 0        | 0        | 2.71E-04 |
| 0.001468 | 1.49E-04 | 6.40E-05 | 8.16E-04 | 0.001481 | 4.17E-04 | 1.02E-04 | 3.20E-04 | 0.002953 | 2.79E-04 | 0.004465 | 0        | 0        | 6.80E-05 | 5.66E-04 |
| 2.12E-04 | 0        | 7.01E-04 | 3.60E-05 | 0.001004 | 0.00964  | 9.30E-05 | 6.00E-05 | 2.67E-04 | 6.20E-05 | 4.93E-04 | 1.10E-04 | 3.17E-04 | 4.69E-04 | 1.09E-04 |
| 0.005424 | 1.22E-04 | 0        | 2.27E-04 | 0.002387 | 4.93E-04 | 2.36E-04 | 6.86E-04 | 0.001086 | 0        | 0.00187  | 0        | 8.60E-05 | 3.85E-04 | 1.21E-04 |
| 8.54E-04 | 0        | 2.34E-04 | 2.60E-05 | 0        | 0        | 0        | 8.20E-05 | 2.79E-04 | 0        | 0.002098 | 6.53E-04 | 0        | 2.40E-05 | 0        |
| 8.15E-04 | 0.002616 | 0.001138 | 1.41E-04 | 2.21E-04 | 2.57E-04 | 2.50E-04 | 5.54E-04 | 5.18E-04 | 1.21E-04 | 3.45E-04 | 0.007229 | 0.002124 | 0.001992 | 5.84E-04 |
| 2.04E-04 | 0        | 1.08E-04 | 0        | 0        | 0.003745 | 0        | 0        | 2.63E-04 | 3.00E-05 | 0        | 0        | 3.70E-05 | 6.14E-04 | 0        |
| 2.05E-04 | 0.002892 | 0.002262 | 0        | 0        | 2.46E-04 | 6.90E-05 | 4.45E-04 | 3.21E-04 | 3.00E-05 | 1.71E-04 | 5.46E-04 | 0.004353 | 9.88E-04 | 1.57E-04 |
| 2.32E-04 | 2.90E-05 | 0        | 0        | 0        | 0.001873 | 0        | 0        | 4.90E-05 | 0        | 0        | 0        | 1.52E-04 | 6.53E-04 | 0        |
| 5.70E-05 | 0        | 0        | 7.50E-05 | 0        | 0        | 0        | 0        | 0        | 0        | 2.16E-04 | 0        | 0        | 0        | 5.70E-05 |
| 1.50E-05 | 0        | 2.33E-04 | 2.05E-04 | 0.001447 | 5.21E-04 | 9.30E-05 | 6.12E-04 | 9.10E-05 | 1.68E-04 | 0.002075 | 0        | 1.06E-04 | 3.90E-05 | 3.99E-04 |
| 7.70E-05 | 2.70E-05 | 0        | 0        | 0        | 0.001685 | 2.50E-05 | 0        | 1.40E-04 | 0        | 0        | 1.09E-04 | 0        | 6.75E-04 | 0        |
| 0.006033 | 0        | 0        | 0        | 2.08E-04 | 8.69E-04 | 3.26E-04 | 4.66E-04 | 3.30E-04 | 5.90E-05 | 0.00136  | 4.90E-05 | 8.80E-05 | 5.34E-04 | 2.09E-04 |
| 0        | 0        | 0        | 0        | 2.91E-04 | 0        | 0        | 8.40E-05 | 5.00E-05 | 0        | 0.002604 | 0        | 0        | 4.90E-05 | 0        |
| 4.91E-04 | 1.00E-04 | 3.36E-04 | 3.98E-04 | 1.01E-04 | 0        | 6.07E-04 | 6.87E-04 | 8.90E-05 | 1.17E-04 | 1.07E-04 | 3.09E-04 | 6.54E-04 | 9.30E-05 | 2.42E-04 |
| 6.80E-05 | 0        | 0        | 0        | 1.25E-04 | 1.42E-04 | 0        | 2.80E-05 | 2.90E-05 | 0        | 0        | 0        | 3.85E-04 | 1.57E-04 | 0        |
| 0.005365 | 0        | 0        | 0        | 2.76E-04 | 0.001444 | 9.10E-04 | 1.90E-04 | 1.16E-04 | 1.83E-04 | 0.00281  | 0        | 1.46E-04 | 3.14E-04 | 0        |
| 2.61E-04 | 3.80E-05 | 0        | 2.67E-04 | 3.10E-05 | 1.92E-04 | 0        | 6.90E-05 | 6.70E-05 | 0        | 3.41E-04 | 0        | 1.84E-04 | 0        | 0        |
| 0        | 0        | 0        | 0        | 0        | 2.03E-04 | 0        | 0        | 0        | 0        | 0        | 0        | 0        | 0        | 0        |
| 2.60E-05 | 0        | 0        | 0        | 0        | 0        | 0        | 0        | 0        | 0        | 5.94E-04 | 0        | 0        | 0        | 0        |
| 3.50E-05 | 0        | 0        | 0        | 0        | 3.80E-05 | 0        | 0        | 0        | 0        | 2.60E-05 | 0        | 0        | 0        | 0        |
| 0.027006 | 0.00546  | 0.007412 | 0.001835 | 0.007054 | 0.019763 | 0.004896 | 0.008253 | 0.009336 | 0.001547 | 0.017067 | 0.004207 | 0.008647 | 0.004444 | 0.00401  |

| HC037    | HC100    | HC139    | HC104    | HC123    | HC095    | HC141    | HC025    | HC082    | HC083    | HC103    | HC054    | HC045    | HC006    | HC112    |
|----------|----------|----------|----------|----------|----------|----------|----------|----------|----------|----------|----------|----------|----------|----------|
| 0.068815 | 0.062001 | 0.050518 | 0.042585 | 0.041723 | 0.040504 | 0.039319 | 0.038459 | 0.038404 | 0.03708  | 0.036073 | 0.033874 | 0.033066 | 0.027513 | 0.02734  |
| 0.398183 | 0.26896  | 0.117916 | 0.003957 | 0.173783 | 0.025186 | 0.255736 | 0.012854 | 0.011352 | 0.008984 | 0.223248 | 0.325912 | 0.193512 | 0.021314 | 0.32641  |
| 0.042626 | 0.020518 | 0.035219 | 0.303008 | 0.24563  | 0.05909  | 0.020233 | 0.132839 | 0.009991 | 0.092555 | 0.048841 | 0.029605 | 0.043637 | 0.076416 | 0.035899 |
| 0.062295 | 0.050278 | 0.011133 | 0.036315 | 0.037719 | 0.209908 | 0.042841 | 0.233812 | 0.037428 | 0.103503 | 0.016643 | 0.009234 | 0.076421 | 0.169053 | 0.025707 |
| 0.007111 | 0.111239 | 0.269453 | 0.110202 | 0.285809 | 0.10635  | 0.317043 | 0.22565  | 0.033215 | 0.383416 | 1.55E-04 | 0.101224 | 0.314005 | 0.093351 | 0.239622 |
| 0.003859 | 0.004485 | 0.015441 | 0.006617 | 0.021795 | 0.013925 | 4.58E-04 | 0.006392 | 0.006378 | 0.003744 | 1.04E-04 | 0.045805 | 0.005464 | 0.001261 | 0.016379 |
| 0.21936  | 0.157807 | 0.006763 | 0.010932 | 0.02626  | 0.102258 | 0.080214 | 0.075223 | 0.048937 | 0.051362 | 0.172007 | 0.020103 | 0.057842 | 0.132805 | 0.038274 |
| 0.037292 | 0.027045 | 0.005849 | 0.079294 | 0.006119 | 0.080994 | 0.001206 | 0.047894 | 0.018015 | 0.077051 | 0.018213 | 0.005493 | 0.020516 | 0.126923 | 0.004531 |
| 0.029554 | 0.038476 | 0.214749 | 0.051644 | 0.044024 | 0.127221 | 0.038231 | 0.018897 | 0.042582 | 0.012674 | 5.60E-05 | 0.288093 | 0.065073 | 0.017026 | 0.132208 |
| 0.020598 | 0.127613 | 0.128445 | 0.213816 | 0.02937  | 0.007568 | 0.138589 | 0.020974 | 0.009284 | 0.056478 | 0.345561 | 0.024852 | 0.06891  | 0.180217 | 0.06327  |
| 0.027422 | 0.019953 | 0.008816 | 0.008443 | 0.007056 | 0.016174 | 0.002061 | 0.031527 | 0.017186 | 0.008115 | 0.001256 | 0.003837 | 0.009014 | 0.011492 | 0.009562 |
| 0.004217 | 0.020226 | 0.009584 | 0.038469 | 0.015891 | 0.010534 | 0.019799 | 0.014216 | 1.08E-04 | 0.028876 | 0.030891 | 0.005712 | 0.008963 | 0.032447 | 0.008254 |
| 0.005208 | 0.005238 | 0.012092 | 0.008905 | 0.006572 | 0.00747  | 5.49E-04 | 0.013166 | 0.003615 | 0.009189 | 0        | 0.012465 | 0.014565 | 0.005407 | 0.012059 |
| 0        | 6.45E-04 | 0        | 0        | 2.14E-04 | 0.001767 | 8.20E-05 | 0.002324 | 0.499534 | 3.27E-04 | 5.30E-05 | 0        | 4.42E-04 | 1.75E-04 | 0        |
| 9.36E-04 | 0.00803  | 0.022175 | 0.010352 | 0.01013  | 0.023212 | 8.37E-04 | 0.028208 | 0.004225 | 0.033969 | 0        | 0.005084 | 0.015062 | 0.018534 | 0.01014  |
| 6.37E-04 | 0.002543 | 0.005582 | 8.84E-04 | 1.70E-05 | 0.016723 | 1.91E-04 | 2.85E-04 | 0.001624 | 0.003038 | 0.002071 | 0.006817 | 0.004685 | 0.006418 | 8.51E-04 |
| 0.001614 | 0.003924 | 0.001653 | 0.009908 | 0.004479 | 0.0269   | 0        | 0.002086 | 0.005026 | 0.007243 | 1.55E-04 | 0.001082 | 0.025121 | 0.005643 | 9.76E-04 |
| 0.006174 | 0.005505 | 0.003254 | 0.014852 | 0.00418  | 0.021321 | 8.74E-04 | 0.014336 | 0.002739 | 0.003798 | 2.58E-04 | 0.005255 | 0.006709 | 0.007487 | 0.009967 |
| 0.003944 | 0.00896  | 1.68E-04 | 0.003244 | 6.06E-04 | 0.00553  | 3.17E-04 | 0.003457 | 7.70E-05 | 0.006866 | 0.014906 | 5.94E-04 | 9.24E-04 | 0.015599 | 3.62E-04 |
| 0.006044 | 0.008113 | 0.015136 | 0.010319 | 0.00207  | 0.037512 | 0.003403 | 0.011614 | 0.00582  | 0.016378 | 4.16E-04 | 0.00191  | 0.003003 | 0.01165  | 0.003974 |
| 0.003645 | 0.001899 | 0.00477  | 8.85E-04 | 0.01206  | 0.013787 | 0        | 0.004689 | 0.002218 | 0.011469 | 9.95E-04 | 0.002135 | 0.005706 | 0.004975 | 0.002068 |
| 1.44E-04 | 7.15E-04 | 0.013403 | 0        | 9.33E-04 | 0.001274 | 0.003455 | 0.007784 | 0.001797 | 0.001513 | 0.001692 | 0.018217 | 0.001815 | 5.04E-04 | 0.001816 |
| 5.91E-04 | 0.002802 | 8.98E-04 | 0.009145 | 0.004631 | 0.003364 | 4.42E-04 | 0.006568 | 0        | 0.007205 | 0.002493 | 5.56E-04 | 0.00172  | 0.004994 | 9.43E-04 |
| 0.032419 | 0        | 0.00343  | 0        | 0        | 0        | 0        | 3.10E-05 | 0        | 0        | 0        | 0.001772 | 0        | 0        | 0.007247 |
| 0.001745 | 4.71E-04 | 0.001241 | 0.005425 | 0.001661 | 0.002421 | 0        | 0.008146 | 0.002056 | 0.001858 | 0        | 0.004747 | 0.001033 | 0.002835 | 5.37E-04 |
| 0.001107 | 0.01408  | 0.007116 | 0.002866 | 0.003937 | 2.06E-04 | 0.020944 | 1.99E-04 | 1.70E-05 | 0.001132 | 0.040907 | 0.004126 | 0.00548  | 0.00454  | 0.007778 |
| 0.001547 | 0.003615 | 4.59E-04 | 0.002014 | 7.98E-04 | 0.004276 | 6.60E-04 | 0.007104 | 2.54E-04 | 0.002248 | 4.64E-04 | 1.87E-04 | 0.001148 | 0.007073 | 5.84E-04 |
| 2.55E-04 | 7.76E-04 | 0.00309  | 0        | 0.001121 | 1.98E-04 | 0.00149  | 3.80E-05 | 2.00E-05 | 7.75E-04 | 0        | 0.0035   | 4.41E-04 | 4.70E-04 | 0.001069 |
| 0.001698 | 6.58E-04 | 7.50E-05 | 8.69E-04 | 0.001791 | 9.86E-04 | 0        | 1.88E-04 | 4.18E-04 | 6.98E-04 | 0        | 3.21E-04 | 3.40E-04 | 7.21E-04 | 1.70E-04 |
| 2.82E-04 | 0        | 0        | 1.22E-04 | 9.31E-04 | 1.00E-04 | 0        | 2.40E-05 | 0        | 5.00E-05 | 0        | 0        | 2.40E-05 | 0        | 4.00E-05 |
| 2.53E-04 | 3.65E-04 | 0.003013 | 1.11E-04 | 0        | 0.002983 | 2.86E-04 | 2.40E-05 | 0.004962 | 0.002107 | 0        | 0.019516 | 9.78E-04 | 0        | 0.001474 |
| 3.50E-04 | 0.008203 | 0.005076 | 0.001099 | 0.002287 | 7.00E-05 | 0.005156 | 3.91E-04 | 2.27E-04 | 3.81E-04 | 0.03905  | 0.001374 | 9.21E-04 | 0.00168  | 0.002152 |
| 0.003273 | 2.91E-04 | 0        | 0        | 0        | 7.90E-05 | 1.93E-04 | 4.00E-05 | 0.00581  | 5.70E-05 | 0        | 0        | 0.004028 | 4.01E-04 | 0        |
| 7.50E-05 | 9.25E-04 | 0        | 0        | 0        | 7.18E-04 | 0        | 6.90E-05 | 0        | 0        | 0        | 0        | 1.60E-05 | 0        | 0        |
| 6.20E-04 | 0.001359 | 0.012729 | 4.64E-04 | 0        | 0.012479 | 3.00E-05 | 0.010408 | 5.13E-04 | 0.01022  | 0        | 0.002833 | 4.35E-04 | 3.20E-05 | 0.001272 |
| 4.82E-04 | 0        | 0        | 0        | 1.64E-04 | 2.00E-05 | 1.24E-04 | 0        | 0        | 0        | 0        | 5.86E-04 | 1.20E-04 | 4.10E-05 | 0        |
| 7.10E-05 | 1.84E-04 | 4.58E-04 | 0        | 1.40E-05 | 0.001082 | 1.82E-04 | 1.19E-04 | 1.16E-04 | 1.37E-04 | 0        | 0.003351 | 0.001207 | 1.62E-04 | 1.14E-04 |
| 2.60E-05 | 0.001826 | 0        | 0.001211 | 0        | 2.10E-05 | 8.48E-04 | 1.80E-04 | 7.90E-05 | 1.44E-04 | 2.07E-04 | 5.60E-05 | 5.10E-05 | 1.50E-04 | 6.90E-05 |
| 4.10E-05 | 1.77E-04 | 3.18E-04 | 5.20E-05 | 5.10E-05 | 0.001135 | 6.70E-05 | 1.58E-04 | 8.24E-04 | 8.41E-04 | 0        | 5.32E-04 | 5.89E-04 | 1.79E-04 | 0.00093  |
| 9.10E-05 | 2.56E-04 | 0        | 0        | 0        | 2.00E-05 | 0        | 0        | 0        | 0        | 0        | 0        | 0        | 0        | 0        |
| 3.56E-04 | 0.001241 | 0.001016 | 0.005715 | 5.46E-04 | 0.002971 | 3.80E-04 | 0.00263  | 0        | 0.003688 | 2.51E-04 | 2.31E-04 | 2.02E-04 | 0.00267  | 3.15E-04 |
| 0        | 1.35E-04 | 0        | 0        | 2.30E-05 | 4.95E-04 | 0        | 3.91E-04 | 0.061241 | 1.27E-04 | 0        | 0        | 2.07E-04 | 4.30E-05 | 0        |
| 2.30E-04 | 9.06E-04 | 2.35E-04 | 5.90E-04 | 2.28E-04 | 0.001087 | 4.29E-04 | 0.002925 | 0        | 0.00146  | 3.46E-04 | 0        | 2.21E-04 | 5.24E-04 | 2.07E-04 |
| 0        | 1.11E-04 | 0        | 0        | 9.90E-05 | 3.87E-04 | 0        | 4.12E-04 | 0.065501 | 4.80E-05 | 0        | 0        | 1.66E-04 | 3.30E-05 | 0        |
| 0        | 0        | 0        | 0        | 5.90E-05 | 1.12E-04 | 5.50E-05 | 3.50E-05 | 0        | 5.30E-05 | 0        | 0        | 4.20E-05 | 0        | 0        |
| 0        | 4.72E-04 | 1.12E-04 | 0        | 0.001125 | 0        | 3.05E-04 | 3.00E-05 | 2.70E-05 | 1.60E-05 | 5.20E-05 | 5.23E-04 | 5.00E-05 | 0        | 7.00E-05 |
| 0        | 7.50E-05 | 0        | 0        | 7.50E-05 | 2.24E-04 | 0        | 2.03E-04 | 0.035193 | 2.30E-05 | 0        | 0        | 1.42E-04 | 3.30E-05 | 0        |
| 7.30E-05 | 5.53E-04 | 1.08E-04 | 4.41E-04 | 5.60E-05 | 9.91E-04 | 3.70E-05 | 6.50E-05 | 4.95E-04 | 8.80E-05 | 0        | 4.31E-04 | 1.95E-04 | 2.10E-04 | 3.10E-04 |
| 0.001708 | 0        | 1.84E-04 | 0        | 0        | 0        | 7.60E-05 | 0        | 2.10E-05 | 0        | 0        | 3.40E-05 | 0        | 0        | 5.46E-04 |
| 0        | 1.18E-04 | 1.17E-04 | 6.56E-04 | 1.23E-04 | 6.41E-04 | 0        | 1.90E-04 | 2.40E-05 | 0.001005 | 0        | 8.80E-05 | 1.66E-04 | 2.80E-04 | 0        |
| 0        | 0        | 0        | 0        | 0        | 0        | 1.90E-04 | 3.30E-05 | 0        | 0        | 0        | 8.20E-05 | 0        | 0        | 3.80E-05 |
| 2.27E-04 | 8.28E-04 | 5.02E-04 | 0        | 1.94E-04 | 6.62E-04 | 6.90E-05 | 2.51E-04 | 1.75E-04 | 5.83E-04 | 0        | 2.51E-04 | 1.25E-04 | 1.39E-04 | 7.23E-04 |
| 1.34E-04 | 4.00E-05 | 0        | 4.10E-05 | 0        | 5.70E-05 | 0        | 9.20E-05 | 1.05E-04 | 4.70E-05 | 0        | 2.90E-05 | 7.50E-05 | 3.90E-05 | 0        |
| 0        | 4.20E-05 | 0        | 0        | 1.65E-04 | 0        | 3.70E-05 | 0        | 0        | 0        | 0        | 0        | 0        | 0        | 0        |
| 0        | 0        | 3.87E-04 | 0        | 0        | 0        | 0        | 0        | 0        | 0        | 5.30E-05 | 0        | 0        | 0        | 0        |
| 0        | 0        | 0        | 0        | 0        | 0        | 0        | 0        | 0        | 0        | 0        | 0        | 0        | 0        | 0        |
| 0.002668 | 0.005318 | 0.00712  | 0.004548 | 0.003481 | 0.007007 | 0.002562 | 0.01237  | 0.022367 | 0.007381 | 0.002583 | 0.007571 | 0.005423 | 0.006541 | 0.003743 |

| HC047    | HC089    | HC024    | HC135    | HC101    | HC108    | HC150    | HC078    | HC130    | HC127    | HC028    | HC062    | HC058    | HC110    | HC126    |
|----------|----------|----------|----------|----------|----------|----------|----------|----------|----------|----------|----------|----------|----------|----------|
| 0.026144 | 0.025097 | 0.022193 | 0.020763 | 0.01963  | 0.01848  | 0.017253 | 0.016579 | 0.015558 | 0.014407 | 0.013752 | 0.009179 | 0.008952 | 0.00763  | 0.002998 |
| 0.022826 | 0.073792 | 0.063303 | 0.212987 | 0.377657 | 0.024364 | 0.279886 | 0.076734 | 0.328792 | 0.00596  | 0.042387 | 0.083943 | 0.006021 | 0.052989 | 0.289638 |
| 0.171673 | 0.031379 | 0.025159 | 0.076989 | 0.059528 | 0.081205 | 0.032236 | 0.010331 | 0.03616  | 0.020852 | 0.065904 | 0.032027 | 0.003055 | 0.01219  | 0.049281 |
| 0.054366 | 0.238187 | 0.082826 | 0.137663 | 0.034139 | 0.05681  | 0.041839 | 0.353641 | 0.02262  | 0.252583 | 0.024403 | 0.042929 | 0.117751 | 0.395418 | 0.029744 |
| 0.371803 | 0.143634 | 0.025145 | 0.025303 | 0.106704 | 0.027185 | 0.271961 | 0.006996 | 0.170108 | 0.097317 | 0.03223  | 0.290409 | 0.026693 | 0.005316 | 0.362335 |
| 0.003669 | 0.018138 | 0.002861 | 0.035973 | 0.009909 | 0.032444 | 0.009615 | 0.008277 | 0.002825 | 0.001581 | 0.00356  | 9.27E-04 | 0.007739 | 3.60E-04 | 6.80E-04 |
| 0.057997 | 0.091877 | 0.432754 | 0.101805 | 0.033116 | 0.043878 | 0.031656 | 0.287517 | 0.057393 | 0.124482 | 0.041754 | 0.080544 | 0.072244 | 0.309505 | 0.093433 |
| 0.045168 | 0.042824 | 0.042805 | 0.055257 | 0.038005 | 0.053004 | 0.007615 | 0.094621 | 0.016336 | 0.11737  | 0.024313 | 0.046908 | 0.052518 | 0.102982 | 0.00612  |
| 0.066673 | 0.019385 | 0.01569  | 0.04134  | 0.153185 | 0.125212 | 0.131769 | 0.008381 | 0.015622 | 0.007278 | 0.118357 | 0.046771 | 0.014358 | 0.007083 | 0.037828 |
| 0.017928 | 0.045805 | 0.080545 | 0.013388 | 0.042114 | 0.090848 | 0.048706 | 0.006382 | 0.218478 | 0.135091 | 0.532695 | 0.249842 | 0.003885 | 0.020533 | 0.009037 |
| 0.022928 | 0.043898 | 0.082882 | 0.04126  | 0.016971 | 0.009736 | 0.009578 | 0.016217 | 0.001868 | 0.043861 | 0.008886 | 0.018394 | 0.054037 | 0.011834 | 0.004175 |
| 0.017337 | 0.008824 | 0.025198 | 0.004851 | 0.021001 | 0.001808 | 0.021838 | 0.019559 | 0.016745 | 0.035536 | 0.017774 | 0.02444  | 0.001849 | 0.02045  | 0.02165  |
| 0.003728 | 0.004428 | 0.002921 | 0.010067 | 0.01463  | 0.015395 | 0.010865 | 0.00392  | 0.01095  | 0.005893 | 0.00367  | 0.002977 | 0.005374 | 6.04E-04 | 0.008923 |
| 0.001281 | 0.019017 | 0.001204 | 0        | 2.53E-04 | 0.112633 | 1.34E-04 | 8.26E-04 | 1.27E-04 | 5.93E-04 | 2.27E-04 | 0.001076 | 0.490151 | 0.001632 | 6.75E-04 |
| 0.011064 | 0.004534 | 0.003415 | 0.003216 | 0.005928 | 0.105603 | 0.005721 | 0.002542 | 0.001927 | 0.011744 | 0.010874 | 0.00299  | 0.005549 | 3.89E-04 | 0.018851 |
| 0.005212 | 0.009032 | 0.001315 | 0.005719 | 0.003704 | 0.00485  | 0.001542 | 0.003036 | 0.00111  | 0.00585  | 9.39E-04 | 7.40E-04 | 0.002789 | 8.20E-05 | 2.69E-04 |
| 0.006972 | 0.002953 | 0.001164 | 0.002861 | 0.001297 | 0.021847 | 0.006003 | 0.002116 | 0.002376 | 0.002859 | 0.003814 | 8.02E-04 | 0.001113 | 6.09E-04 | 0.003834 |
| 0.011869 | 0.009547 | 8.20E-04 | 0.01495  | 0.007959 | 0.055278 | 0.002195 | 0.007633 | 0.009707 | 0.002727 | 0.008239 | 0.003777 | 0.00466  | 0.004618 | 0.005315 |
| 0.003409 | 0.00282  | 0.027911 | 0.002939 | 0.004304 | 5.72E-04 | 0.001571 | 0.029477 | 0.003128 | 0.01781  | 0.002354 | 0.006195 | 0.001484 | 0.02033  | 0.005033 |
| 0.030206 | 0.030474 | 0.005236 | 0.009238 | 0.002404 | 0.012456 | 0.005653 | 0.014903 | 0.003636 | 0.039035 | 0.010113 | 0.00544  | 0.011744 | 0.005869 | 0.001062 |
| 0.008562 | 0.009221 | 0.005645 | 0.004409 | 0.006727 | 0.006728 | 0.002825 | 0.001881 | 0.001391 | 0.003178 | 0.002554 | 0.001245 | 0.00637  | 1.16E-04 | 0.002978 |
| 5.54E-04 | 0.013365 | 9.73E-04 | 0.001059 | 0.003459 | 0.001888 | 0.005978 | 0.00167  | 0.001894 | 4.78E-04 | 7.60E-05 | 0.00171  | 2.62E-04 | 1.02E-04 | 4.50E-04 |
| 0.004689 | 0.001321 | 0.007739 | 0.00117  | 0.002574 | 6.94E-04 | 0.002466 | 0.002978 | 8.85E-04 | 0.004896 | 0.001727 | 0.001304 | 3.74E-04 | 0.001672 | 0.004414 |
| 0        | 0.057372 | 0        | 0.129984 | 0        | 0        | 0        | 0        | 0        | 0        | 0        | 0        | 1.80E-05 | 0        | 0        |
| 0.005181 | 7.13E-04 | 7.60E-05 | 0.002109 | 0.001967 | 0.008019 | 0.00426  | 1.11E-04 | 0.013064 | 6.14E-04 | 1.38E-04 | 5.50E-05 | 0.003622 | 1.11E-04 | 0.003464 |
| 0.001062 | 6.54E-04 | 0.004335 | 3.26E-04 | 0.008625 | 4.40E-04 | 0.00797  | 0.001089 | 0.027251 | 0.002105 | 0.012906 | 0.010281 | 0        | 0.001558 | 0.005082 |
| 0.003267 | 0.005785 | 0.01301  | 0.003161 | 0.002088 | 3.06E-04 | 0.001797 | 0.010504 | 2.20E-04 | 0.018231 | 0.001246 | 0.002693 | 0.002416 | 0.00791  | 0.001541 |
| 4.00E-05 | 0.003816 | 4.85E-04 | 2.52E-04 | 1.41E-04 | 5.97E-04 | 0.001124 | 1.40E-04 | 6.28E-04 | 3.35E-04 | 4.40E-05 | 1.42E-04 | 9.70E-05 | 0        | 4.00E-05 |
| 9.19E-04 | 9.49E-04 | 5.33E-04 | 0.002416 | 6.43E-04 | 6.42E-04 | 6.22E-04 | 0.001303 | 2.10E-04 | 1.01E-04 | 6.00E-05 | 1.51E-04 | 5.46E-04 | 4.90E-05 | 9.84E-04 |
| 0        | 1.11E-04 | 3.40E-05 | 3.42E-04 | 2.00E-05 | 7.20E-05 | 0        | 0        | 0        | 0        | 0        | 0        | 1.80E-05 | 0        | 0        |
| 9.79E-04 | 0.008151 | 6.89E-04 | 1.97E-04 | 0.001712 | 0.003979 | 0.004989 | 1.21E-04 | 8.13E-04 | 0        | 2.92E-04 | 0.001311 | 9.88E-04 | 0        | 0.007197 |
| 6.20E-04 | 4.65E-04 | 0.002697 | 8.80E-05 | 0.004547 | 5.77E-04 | 0.004468 | 2.03E-04 | 0.009294 | 4.35E-04 | 0.00754  | 0.005135 | 2.26E-04 | 6.78E-04 | 0.002019 |
| 2.71E-04 | 2.15E-04 | 1.36E-04 | 2.69E-04 | 9.79E-04 | 2.13E-04 | 0        | 1.58E-04 | 0        | 3.10E-05 | 0        | 0.012771 | 3.46E-04 | 5.60E-05 | 0        |
| 3.40E-05 | 5.60E-05 | 3.30E-05 | 3.54E-04 | 0        | 0.001096 | 0        | 2.02E-04 | 7.50E-05 | 3.40E-05 | 0        | 9.50E-05 | 0        | 0        | 0        |
| 0.003989 | 0.00857  | 0.002437 | 0.00365  | 0.002543 | 0.002104 | 0.012789 | 0        | 0.002464 | 0.003044 | 5.10E-04 | 0.002307 | 0.001931 | 0        | 0.005115 |
| 0        | 4.10E-05 | 0        | 0.001132 | 0        | 9.20E-05 | 4.90E-05 | 1.11E-04 | 3.60E-05 | 0        | 4.50E-05 | 0        | 0        | 1.86E-04 | 0        |
| 5.50E-05 | 4.53E-04 | 2.00E-05 | 5.22E-04 | 0.001413 | 5.55E-04 | 0.001016 | 0        | 1.14E-04 | 0        | 0        | 0        | 4.10E-05 | 0        | 7.20E-04 |
| 2.20E-04 | 6.66E-04 | 5.49E-04 | 0.001022 | 0        | 0.001036 | 4.57E-04 | 0        | 4.10E-05 | 0        | 1.14E-04 | 0.003559 | 0        | 4.90E-05 | 1.74E-04 |
| 7.20E-05 | 3.40E-04 | 4.22E-04 | 7.70E-04 | 2.53E-04 | 0.00102  | 4.42E-04 | 4.34E-04 | 2.06E-04 | 2.23E-04 | 7.80E-05 | 3.10E-05 | 5.88E-04 | 2.90E-05 | 6.70E-04 |
| 0        | 2.30E-05 | 3.20E-05 | 5.24E-04 | 0        | 6.58E-04 | 0        | 2.90E-04 | 0        | 0        | 2.60E-05 | 0        | 1.00E-05 | 0        | 1.57E-04 |
| 0.006602 | 0.001089 | 8.76E-04 | 3.23E-04 | 9.13E-04 | 3.51E-04 | 9.03E-04 | 0.003428 | 2.81E-04 | 0.006167 | 0.001803 | 5.10E-04 | 1.21E-04 | 0.001065 | 5.44E-04 |
| 2.43E-04 | 0.001934 | 1.43E-04 | 0        | 0        | 0.010356 | 0        | 1.46E-04 | 4.60E-05 | 3.50E-05 | 2.80E-05 | 9.00E-05 | 0.036782 | 1.40E-04 | 0        |
| 7.04E-04 | 0.001485 | 0.006428 | 3.46E-04 | 7.91E-04 | 4.30E-05 | 7.59E-04 | 0.001764 | 9.40E-05 | 0.006414 | 4.97E-04 | 0.001287 | 9.58E-04 | 0.001508 | 8.92E-04 |
| 1.14E-04 | 7.38E-04 | 0        | 0        | 0        | 0.006876 | 0        | 0        | 0        | 2.80E-05 | 0        | 5.20E-05 | 0.021306 | 1.67E-04 | 7.30E-05 |
| 0        | 0        | 0        | 4.20E-05 | 0        | 5.85E-04 | 0        | 0        | 0        | 3.60E-05 | 0        | 0        | 0        | 0        | 3.60E-05 |
| 4.40E-05 | 1.44E-04 | 1.11E-04 | 1.19E-04 | 8.33E-04 | 1.80E-05 | 9.87E-04 | 1.97E-04 | 1.20E-04 | 0        | 0        | 5.70E-05 | 1.70E-05 | 0        | 3.14E-04 |
| 7.50E-05 | 9.72E-04 | 0        | 0        | 2.20E-05 | 0.00831  | 0        | 1.03E-04 | 0        | 1.11E-04 | 2.40E-05 | 1.29E-04 | 0.016789 | 7.10E-05 | 7.70E-05 |
| 1.53E-04 | 7.37E-04 | 0        | 6.60E-04 | 1.18E-04 | 0.012795 | 2.18E-04 | 0        | 0        | 2.80E-05 | 1.35E-04 | 0        | 4.90E-05 | 3.30E-05 | 3.12E-04 |
| 0        | 2.20E-05 | 0        | 0.011736 | 0        | 2.70E-05 | 0        | 0        | 0        | 0        | 0        | 0        | 0        | 0        | 0        |
| 2.05E-04 | 2.90E-05 | 0        | 1.96E-04 | 7.10E-05 | 5.89E-04 | 2.59E-04 | 3.90E-05 | 3.50E-05 | 9.50E-05 | 1.29E-04 | 0        | 0        | 0        | 9.21E-04 |
| 0        | 0        | 1.02E-04 | 6.00E-05 | 0        | 0        | 1.79E-04 | 0        | 0        | 0        | 0        | 0        | 0.002431 | 0        | 8.00E-05 |
| 4.85E-04 | 0.001272 | 0        | 3.68E-04 | 1.71E-04 | 0.012337 | 2.11E-04 | 0        | 4.69E-04 | 0        | 2.04E-04 | 4.42E-04 | 2.00E-05 | 0        | 4.40E-04 |
| 1.80E-04 | 1.91E-04 | 0        | 3.34E-04 | 1.19E-04 | 3.43E-04 | 0        | 0        | 0        | 0        | 0        | 5.40E-05 | 0        | 1.80E-05 | 8.60E-05 |
| 0        | 6.20E-05 | 4.10E-05 | 0        | 0        | 0        | 0        | 0        | 0        | 0        | 0        | 0        | 0        | 0        | 0        |
| 0        | 2.50E-05 | 0        | 0        | 0        | 0        | 0        | 0        | 0        | 0        | 0        | 0        | 0        | 0        | 3.60E-05 |
| 0        | 0        | 0        | 0        | 0        | 0        | 0        | 0        | 0        | 3.00E-05 | 0        | 0        | 1.60E-05 | 0        | 0        |
| 0.008428 | 0.013368 | 0.007107 | 0.015491 | 0.006833 | 0.023046 | 0.007596 | 0.00344  | 0.004903 | 0.010522 | 0.003579 | 0.004279 | 0.011692 | 0.004059 | 0.010303 |

| HC087    | SP22     | SP28     | SP29     | SP04     | SP27     | SP05     | SP17     | SP07     | SP18     | SP03     | SP11     | SP25     | SP37     | SP20     |
|----------|----------|----------|----------|----------|----------|----------|----------|----------|----------|----------|----------|----------|----------|----------|
| 0.00246  | 0.642976 | 0.621842 | 0.591233 | 0.516112 | 0.512543 | 0.495194 | 0.453523 | 0.421217 | 0.387463 | 0.378987 | 0.373482 | 0.296529 | 0.27726  | 0.250877 |
| 0.018754 | 0.090704 | 0.006827 | 0.011254 | 0.128566 | 0.105052 | 0.294834 | 0.014905 | 0.310352 | 0.043545 | 0.016857 | 0.036769 | 0.021265 | 3.82E-04 | 0.140265 |
| 0.027636 | 0.049866 | 0.114854 | 0.115925 | 0.093043 | 0.177285 | 0.028267 | 0.022218 | 0.014189 | 0.076966 | 0.112748 | 0.116011 | 0.011147 | 0.014335 | 0.03515  |
| 0.064374 | 0.006715 | 0.048169 | 0.021486 | 0.038888 | 0.003803 | 0.016514 | 0.039743 | 0.002206 | 0.012168 | 0.04011  | 0.036097 | 0.007405 | 0.079581 | 0.074487 |
| 0.245608 | 0.007301 | 0.01618  | 1.15E-04 | 0.002059 | 2.23E-04 | 2.59E-04 | 0.001089 | 0.001674 | 0.001393 | 0.018625 | 0.00413  | 0.001507 | 0.003143 | 0.019644 |
| 0.042417 | 0.088793 | 0.004944 | 0.174566 | 0.006021 | 0.002567 | 0.078954 | 0.23246  | 0.105076 | 0.300225 | 0.004885 | 0.22649  | 0.575301 | 4.33E-04 | 0.094154 |
| 0.019576 | 0.011569 | 0.001478 | 0.001723 | 0.101544 | 0.001779 | 0.003999 | 0.004067 | 0.018655 | 0.002944 | 0.13184  | 0.088472 | 0.004726 | 0.159194 | 0.002467 |
| 0.011985 | 0.037702 | 0.039295 | 0.029527 | 0.023516 | 0.003705 | 0.004661 | 0.081115 | 3.56E-04 | 0.04538  | 0.141981 | 0.006421 | 0.0308   | 0.152348 | 0.003319 |
| 0.251125 | 9.25E-04 | 0.00189  | 0.004184 | 0.00529  | 1.52E-04 | 0.012958 | 0.002448 | 0.024841 | 0.002784 | 0.024471 | 0.002664 | 0.003056 | 0.011904 | 0.002891 |
| 0.168652 | 0.012821 | 0.013862 | 0.005267 | 0.004593 | 0.01683  | 0.003703 | 0.001134 | 0.005796 | 0.002027 | 0.006139 | 0.004795 | 0.001715 | 3.25E-04 | 0.267653 |
| 0.012106 | 8.15E-04 | 0.015074 | 2.53E-04 | 5.79E-04 | 5.33E-04 | 0.001948 | 0.00513  | 5.70E-04 | 0.001191 | 0.003781 | 0.009062 | 2.55E-04 | 0.023284 | 0.002075 |
| 0.013434 | 0.014371 | 0.012945 | 0.001828 | 0.028999 | 0.006766 | 0.020228 | 0.011607 | 0.014929 | 0.004573 | 0.024245 | 0.0081   | 0.00465  | 0.008758 | 0.012316 |
| 0.010676 | 0.001195 | 0.015033 | 0.013831 | 0.00389  | 0.009814 | 0.00873  | 0.01279  | 0.010729 | 0.017192 | 0.00144  | 0.028202 | 0.00523  | 0.019695 | 0.005927 |
| 0        | 1.31E-04 | 0        | 5.80E-04 | 0        | 0        | 0        | 8.00E-05 | 0        | 1.89E-04 | 0        | 4.50E-05 | 1.18E-04 | 0        | 8.90E-05 |
| 0.001896 | 0.004796 | 1.28E-04 | 0.001683 | 0.001448 | 0.00195  | 9.54E-04 | 3.68E-04 | 0.007816 | 3.16E-04 | 0.008658 | 0.006776 | 4.90E-05 | 0.002606 | 0.008152 |
| 0.001891 | 0.002428 | 0.001249 | 0.005775 | 0        | 4.73E-04 | 2.64E-04 | 0.031387 | 0        | 0.012544 | 0.001971 | 8.75E-04 | 0.004554 | 2.52E-04 | 5.98E-04 |
| 1.25E-04 | 0.006636 | 0.0138   | 0.002986 | 0.008087 | 0.086973 | 0.004408 | 0.010724 | 0.001047 | 0.006837 | 0.002927 | 0.001782 | 8.40E-05 | 0        | 0.004138 |
| 0.01924  | 3.93E-04 | 0.00224  | 0.004427 | 8.69E-04 | 0.014131 | 8.10E-04 | 0.001677 | 1.12E-04 | 0.008781 | 2.54E-04 | 8.39E-04 | 0.001169 | 0.012928 | 0.002154 |
| 4.35E-04 | 0.005263 | 6.17E-04 | 8.80E-05 | 0.013387 | 1.62E-04 | 9.39E-04 | 0.001895 | 0        | 0.001237 | 0.037096 | 0.003069 | 0.001877 | 0.025827 | 1.43E-04 |
| 0.039262 | 0        | 0.00223  | 0.001109 | 7.18E-04 | 0.003509 | 3.67E-04 | 2.62E-04 | 0.001945 | 3.64E-04 | 0.001547 | 0.003611 | 7.17E-04 | 4.26E-04 | 0.005316 |
| 0.001299 | 0.002256 | 0.01185  | 0.002462 | 4.13E-04 | 0.003572 | 0.00102  | 0.001675 | 0.001018 | 0.001394 | 0.00406  | 0.011577 | 7.05E-04 | 0.006616 | 0.004484 |
| 0.003505 | 0        | 0.001249 | 5.16E-04 | 1.47E-04 | 2.27E-04 | 2.84E-04 | 4.71E-04 | 0.040127 | 1.52E-04 | 0.003002 | 0.002625 | 8.08E-04 | 0.00234  | 0.00349  |
| 8.15E-04 | 0.001778 | 0.021337 | 0.00156  | 0.00431  | 0.006474 | 0.002537 | 0.002256 | 0.002028 | 0.002199 | 0.004951 | 0.006718 | 5.81E-04 | 0.005503 | 0.00193  |
| 0.010571 | 0        | 0        | 0        | 0        | 0        | 0        | 0        | 0        | 0        | 0        | 0        | 3.20E-05 | 0        | 0        |
| 0.004451 | 0        | 7.61E-04 | 0        | 0.006929 | 0.011127 | 0.001717 | 0.0027   | 1.13E-04 | 0.007369 | 1.34E-04 | 8.79E-04 | 0.005307 | 0.010048 | 0.004237 |
| 0.002625 | 0.002547 | 3.73E-04 | 3.91E-04 | 0.001169 | 0.003061 | 0.002033 | 3.46E-04 | 0.002223 | 3.19E-04 | 9.35E-04 | 7.61E-04 | 3.60E-04 | 5.10E-05 | 0.017542 |
| 0.001337 | 4.09E-04 | 0.004822 | 2.50E-05 | 4.17E-04 | 1.36E-04 | 6.99E-04 | 0.001974 | 1.18E-04 | 2.31E-04 | 0.001862 | 0.002215 | 4.50E-05 | 0.007858 | 7.13E-04 |
| 3.70E-04 | 4.01E-04 | 0.010531 | 2.66E-04 | 7.23E-04 | 0.010989 | 2.63E-04 | 0.002768 | 5.84E-04 | 8.99E-04 | 0.001853 | 1.01E-04 | 8.23E-04 | 0.003529 | 0.004537 |
| 2.40E-05 | 0        | 0.002869 | 8.99E-04 | 1.41E-04 | 8.81E-04 | 4.52E-04 | 0.011144 | 0        | 0.002051 | 0.002884 | 0.001414 | 0.001092 | 0.013996 | 1.45E-04 |
| 0        | 5.50E-04 | 0.002346 | 4.02E-04 | 0.001697 | 0.002702 | 0.001192 | 0.005055 | 0        | 0.016447 | 0.006581 | 0.003932 | 2.04E-04 | 0        | 2.96E-04 |
| 0.006355 | 0        | 0        | 0        | 0        | 0        | 0        | 7.86E-04 | 0        | 5.80E-05 | 0        | 0        | 1.86E-04 | 0        | 3.18E-04 |
| 8.63E-04 | 0.00328  | 3.79E-04 | 0        | 0.001021 | 0.002245 | 0.002309 | 0        | 0.005648 | 1.04E-04 | 3.74E-04 | 7.10E-04 | 3.18E-04 | 0        | 0.008861 |
| 5.00E-05 | 0        | 0        | 0        | 0        | 0.0018   | 0        | 0        | 0        | 5.20E-05 | 0.004095 | 3.58E-04 | 0        | 1.33E-04 | 0        |
| 2.90E-05 | 1.29E-04 | 0        | 8.50E-04 | 1.47E-04 | 6.68E-04 | 0.001653 | 0.006733 | 0        | 0.013632 | 0.001433 | 0.001842 | 0.001032 | 4.33E-04 | 0.002626 |
| 0.001147 | 0        | 0        | 0        | 1.53E-04 | 0        | 1.81E-04 | 0        | 0        | 4.60E-05 | 0        | 9.30E-05 | 3.90E-05 | 0        | 0.004769 |
| 2.80E-05 | 1.33E-04 | 1.38E-04 | 0.002407 | 1.44E-04 | 0.001649 | 0.001248 | 6.58E-04 | 1.08E-04 | 0.003043 | 5.48E-04 | 0.002553 | 9.04E-04 | 3.23E-04 | 0.002653 |
| 6.54E-04 | 0        | 1.30E-04 | 1.27E-04 | 0        | 0        | 0        | 0.003717 | 0        | 5.40E-05 | 0        | 2.54E-04 | 2.45E-04 | 6.70E-05 | 0.001432 |
| 7.40E-05 | 0        | 1.24E-04 | 4.50E-05 | 0        | 0        | 0        | 0        | 1.06E-04 | 0        | 0.001192 | 0        | 0        | 0        | 0        |
| 3.49E-04 | 2.65E-04 | 2.57E-04 | 4.00E-04 | 1.35E-04 | 1.48E-04 | 0        | 0.014097 | 0        | 0.001006 | 1.39E-04 | 8.80E-05 | 0.005908 | 1.40E-04 | 0.001634 |
| 0        | 1.36E-04 | 3.57E-04 | 0        | 2.84E-04 | 8.18E-04 | 4.41E-04 | 0.001522 | 1.25E-04 | 0.015046 | 0        | 0        | 0.005572 | 0        | 9.51E-04 |
| 0.001251 | 1.39E-04 | 0.001222 | 1.81E-04 | 2.93E-04 | 0.00102  | 5.23E-04 | 2.72E-04 | 3.54E-04 | 2.20E-04 | 2.73E-04 | 7.63E-04 | 0        | 0.001478 | 0.001062 |
| 0        | 0        | 0        | 6.30E-05 | 0        | 0        | 0        | 0        | 0        | 0        | 0        | 4.80E-05 | 0        | 0        | 3.80E-05 |
| 5.93E-04 | 1.55E-04 | 0.001704 | 0        | 2.78E-04 | 0        | 6.77E-04 | 6.62E-04 | 0        | 1.96E-04 | 6.54E-04 | 5.56E-04 | 0        | 0.002224 | 5.11E-04 |
| 0        | 0        | 0        | 9.20E-05 | 1.38E-04 | 0        | 0        | 0        | 0        | 0        | 0        | 0        | 4.20E-05 | 0        | 0        |
| 0        | 0        | 0        | 0        | 0        | 0        | 0        | 0.002366 | 1.14E-04 | 0        | 0        | 0        | 4.60E-05 | 0.146195 | 0        |
| 0        | 7.83E-04 | 0        | 4.30E-05 | 0        | 8.30E-05 | 0.003597 | 0.00115  | 0.004412 | 3.35E-04 | 0        | 4.35E-04 | 1.50E-04 | 0        | 2.68E-04 |
| 0        | 0        | 0        | 6.10E-05 | 0        | 0        | 0        | 0        | 0        | 0        | 0        | 5.10E-05 | 0        | 0        | 0        |
| 7.80E-05 | 0        | 0        | 0        | 0        | 0.001588 | 9.20E-05 | 8.00E-05 | 0        | 2.59E-04 | 2.48E-04 | 2.05E-04 | 1.27E-04 | 3.83E-04 | 4.91E-04 |
| 5.76E-04 | 0        | 0        | 0        | 0        | 0        | 0        | 0        | 0        | 1.08E-04 | 0        | 3.10E-05 | 0        | 1.26E-04 | 0        |
| 0        | 6.84E-04 | 1.37E-04 | 0        | 0.001153 | 0.001472 | 1.70E-04 | 0        | 0        | 0        | 4.16E-04 | 2.00E-04 | 0        | 6.10E-05 | 2.41E-04 |
| 0        | 0        | 7.26E-04 | 0        | 0        | 0        | 0        | 0        | 0        | 0        | 0        | 4.60E-05 | 0        | 0        | 0        |
| 5.59E-04 | 0        | 0        | 0        | 1.40E-04 | 0        | 0        | 0        | 0        | 0        | 0        | 0        | 0        | 0        | 1.29E-04 |
| 0        | 0        | 2.58E-04 | 0        | 0        | 7.30E-05 | 9.30E-05 | 0.006885 | 0        | 0        | 1.32E-04 | 3.44E-04 | 1.14E-04 | 0        | 3.50E-05 |
| 0        | 0        | 0        | 4.90E-05 | 0        | 0        | 8.70E-05 | 0        | 0        | 4.60E-05 | 0        | 0        | 0        | 0        | 3.60E-05 |
| 3.42E-04 | 0        | 0        | 0        | 0        | 0        | 0        | 0        | 0        | 0        | 0        | 0        | 0        | 0        | 0        |
| 0        | 0        | 0        | 0        | 0        | 0        | 0        | 0        | 0        | 0        | 1.36E-04 | 0        | 3.90E-05 | 2.44E-04 | 0        |
| 0.010403 | 9.55E-04 | 0.005773 | 0.001321 | 0.002559 | 0.001017 | 7.41E-04 | 0.004061 | 0.001412 | 0.006615 | 0.005536 | 0.003509 | 0.003167 | 0.005571 | 0.004756 |

| SP26     | SP15     | SP23     | SP10     | SP09     | SP35     | SP08     | SP32     | SP24     | SP14     | SP34     | SP30     | SP31     | SP19     | SP12     |
|----------|----------|----------|----------|----------|----------|----------|----------|----------|----------|----------|----------|----------|----------|----------|
| 0.250743 | 0.232446 | 0.1911   | 0.165012 | 0.164106 | 0.127327 | 0.106541 | 0.082651 | 0.076254 | 0.062517 | 0.051732 | 0.050382 | 0.044107 | 0.036955 | 0.015172 |
| 0.204334 | 0.111284 | 0.005739 | 4.82E-04 | 0.598173 | 0.113041 | 0.449639 | 0.41997  | 0.302618 | 0.614602 | 0.017734 | 0.379136 | 0.054544 | 0.002104 | 0.862807 |
| 0.170205 | 0.172156 | 0.074289 | 0.205909 | 0.076664 | 0.151227 | 0.062899 | 0.081657 | 0.053438 | 0.04378  | 0.086583 | 0.06169  | 0.168276 | 0.002088 | 0.030395 |
| 0.081076 | 0.145287 | 0.34225  | 0.27958  | 0.019352 | 0.181264 | 0.02844  | 0.083767 | 0.027447 | 0.012335 | 0.128299 | 0.081868 | 0.554848 | 0.0017   | 0.006773 |
| 0.007249 | 0.002417 | 0.014674 | 0.00424  | 0.004218 | 0.007857 | 0.006858 | 0.012422 | 0.020163 | 0.002196 | 0.087275 | 0.015285 | 4.86E-04 | 0.009634 | 8.92E-04 |
| 0.107967 | 0.196401 | 0.029837 | 0.055668 | 0.074093 | 0.147353 | 0.088863 | 0.081722 | 0.053986 | 0.097202 | 0.193154 | 0.098459 | 0.066048 | 0.855905 | 0.001657 |
| 0.003359 | 0.015178 | 0.011126 | 0.028804 | 0.002255 | 0.089912 | 0.046793 | 0.047408 | 0.031704 | 0.032983 | 0.029475 | 0.064723 | 0.031005 | 7.20E-04 | 0.001754 |
| 0.012264 | 0.010534 | 0.005243 | 0.111027 | 0.013725 | 0.029359 | 0.001115 | 0.005317 | 0.007982 | 0.002814 | 0.08077  | 0.005689 | 0.026459 | 0.010445 | 0.003924 |
| 0.037555 | 0.011762 | 0.016007 | 0.015639 | 2.62E-04 | 2.26E-04 | 0.042843 | 0.01388  | 0.072602 | 0.026662 | 0.005257 | 0.093866 | 1.62E-04 | 0.001032 | 9.00E-05 |
| 0.038983 | 0.005981 | 0.040708 | 7.70E-05 | 0.004247 | 0.0064   | 0.061822 | 0.053512 | 0.097498 | 0.026803 | 0.012132 | 0.048079 | 5.80E-05 | 0.008828 | 0.009647 |
| 0.007496 | 0.005813 | 9.55E-04 | 0.011894 | 0.001466 | 0.016585 | 1.96E-04 | 0.007647 | 0.001546 | 1.54E-04 | 0.041708 | 0.013445 | 0.013586 | 1.57E-04 | 7.56E-04 |
| 0.009196 | 0.017015 | 0.015439 | 0.019073 | 0.010868 | 0.001642 | 0.001584 | 0.004636 | 0.009508 | 0.017812 | 0.002122 | 1.20E-05 | 0.003935 | 0.006601 | 0.014206 |
| 0.009505 | 0.004933 | 0.004761 | 0.004173 | 0.001997 | 0.021342 | 0.018278 | 0.013009 | 0.014923 | 0.010438 | 0.037753 | 0.005042 | 0.014617 | 0.003761 | 0.002232 |
| 1.86E-04 | 0        | 0        | 6.90E-05 | 0        | 0.014605 | 0.002064 | 0.001692 | 0        | 4.40E-05 | 0.005865 | 0.011636 | 8.09E-04 | 0        | 0        |
| 2.20E-05 | 0.001945 | 0.09469  | 0.002323 | 0.001045 | 0.038269 | 0        | 0.018775 | 0.005218 | 0.001841 | 0.012961 | 0.007404 | 6.31E-04 | 0        | 9.80E-05 |
| 0.002205 | 0.001578 | 2.78E-04 | 0.01978  | 2.12E-04 | 8.76E-04 | 5.30E-05 | 0.001328 | 0.011062 | 4.21E-04 | 0.034749 | 0.002159 | 4.20E-05 | 0.001205 | 0        |
| 0.003322 | 0.008685 | 0.064618 | 0.00512  | 0.005139 | 1.58E-04 | 0.017181 | 0.002818 | 0.005014 | 0        | 0.005741 | 0.001853 | 0.001082 | 8.41E-04 | 3.87E-04 |
| 0.001628 | 0.003815 | 0.004638 | 5.25E-04 | 5.17E-04 | 2.89E-04 | 0.001649 | 0.005572 | 0.008231 | 0.00125  | 0.02783  | 0.00208  | 1.78E-04 | 2.05E-04 | 0.001183 |
| 1.44E-04 | 0.001017 | 3.40E-04 | 0.010227 | 7.42E-04 | 5.51E-04 | 5.00E-05 | 2.72E-04 | 0.001128 | 0.001564 | 7.56E-04 | 0        | 3.58E-04 | 0        | 7.53E-04 |
| 0.006902 | 2.66E-04 | 0.016554 | 0.003285 | 0        | 0.00429  | 0.027106 | 0.009931 | 6.09E-04 | 0.004882 | 0.005367 | 0.020186 | 0        | 0.001334 | 1.08E-04 |
| 0.00814  | 7.21E-04 | 0.007033 | 0.001126 | 5.04E-04 | 0.001763 | 0.017673 | 0.012808 | 8.41E-04 | 0.004421 | 0.007415 | 0.001506 | 2.70E-05 | 0.001186 | 0        |
| 0.002949 | 2.14E-04 | 0.002787 | 0.002096 | 0        | 0.034859 | 0.003251 | 0.016954 | 0.074949 | 3.78E-04 | 0.028694 | 0.010302 | 5.79E-04 | 0.041205 | 0.028508 |
| 0.002504 | 0.009693 | 0.016396 | 0.012105 | 0.002014 | 7.96E-04 | 4.06E-04 | 4.33E-04 | 9.93E-04 | 7.68E-04 | 0.00102  | 1.30E-05 | 0.002708 | 4.87E-04 | 7.62E-04 |
| 0        | 0        | 0        | 0        | 0        | 9.00E-06 | 0        | 0        | 0        | 0        | 2.80E-05 | 0        | 0        | 0        | 0        |
| 0.005328 | 8.87E-04 | 0.006041 | 0.011201 | 3.78E-04 | 2.86E-04 | 2.26E-04 | 0.002365 | 0.001275 | 0.004188 | 0.021559 | 1.64E-04 | 6.30E-05 | 7.30E-05 | 1.58E-04 |
| 0.002658 | 0.001892 | 0.001277 | 0        | 0.002726 | 1.26E-04 | 0.004921 | 0.002491 | 0.007854 | 0.006994 | 0        | 0        | 0        | 1.27E-04 | 0.006136 |
| 8.45E-04 | 0.003834 | 3.66E-04 | 0.009081 | 5.14E-04 | 4.38E-04 | 0        | 2.67E-04 | 0        | 1.57E-04 | 0.001472 | 4.10E-05 | 0.004584 | 1.62E-04 | 2.78E-04 |
| 1.21E-04 | 3.72E-04 | 0.001749 | 4.48E-04 | 0.005165 | 8.00E-05 | 1.30E-04 | 1.79E-04 | 0.013598 | 5.60E-05 | 2.13E-04 | 0.001169 | 1.21E-04 | 0.002589 | 8.63E-04 |
| 0.001502 | 2.77E-04 | 5.54E-04 | 0.004809 | 5.15E-04 | 4.10E-05 | 0        | 6.55E-04 | 7.63E-04 | 4.70E-05 | 0.004091 | 1.20E-04 | 0.00513  | 1.36E-04 | 8.80E-05 |
| 1.97E-04 | 0.006639 | 2.00E-04 | 1.55E-04 | 2.47E-04 | 3.88E-04 | 0        | 3.10E-05 | 3.47E-04 | 0        | 9.38E-04 | 0        | 0.003937 | 1.45E-04 | 0        |
| 0        | 1.68E-04 | 0        | 0        | 0        | 1.70E-05 | 0        | 1.70E-04 | 0.003913 | 0        | 0.005098 | 7.43E-04 | 0        | 2.10E-04 | 0        |
| 0.001245 | 0.001015 | 3.90E-04 | 0        | 0.002551 | 0        | 4.98E-04 | 6.78E-04 | 0.011588 | 0.012788 | 5.00E-05 | 0        | 6.10E-05 | 4.33E-04 | 0.008344 |
| 0        | 0        | 0        | 7.20E-05 | 0        | 1.40E-05 | 0        | 0        | 0.004378 | 0        | 3.14E-04 | 4.80E-05 | 0        | 0        | 0        |
| 0.001487 | 0.006132 | 1.89E-04 | 0        | 0.001672 | 5.10E-05 | 0        | 1.03E-04 | 0.005864 | 6.43E-04 | 7.84E-04 | 7.07E-04 | 5.60E-05 | 0.001796 | 6.53E-04 |
| 1.90E-05 | 0        | 6.75E-04 | 0        | 0        | 4.40E-05 | 0        | 6.76E-04 | 0        | 1.54E-04 | 0.007182 | 1.71E-04 | 0        | 0        | 0        |
| 0.007588 | 0.006815 | 0.00104  | 1.46E-04 | 3.37E-04 | 2.51E-04 | 4.78E-04 | 9.51E-04 | 0.015166 | 4.23E-04 | 1.64E-04 | 0.001344 | 1.41E-04 | 0.002333 | 1.72E-04 |
| 8.20E-05 | 4.50E-05 | 6.80E-05 | 0        | 0        | 0.002979 | 0        | 3.27E-04 | 0.001341 | 0        | 0.014602 | 5.83E-04 | 2.97E-04 | 1.38E-04 | 0        |
| 7.37E-04 | 2.06E-04 | 7.60E-05 | 0.001722 | 5.80E-05 | 1.29E-04 | 0        | 2.74E-04 | 8.50E-04 | 0        | 0.004405 | 1.86E-04 | 0        | 0        | 8.90E-05 |
| 1.27E-04 | 3.98E-04 | 0        | 6.80E-04 | 5.90E-05 | 6.30E-05 | 1.33E-04 | 3.21E-04 | 0.005833 | 5.80E-05 | 0.005264 | 0.001145 | 0        | 2.05E-04 | 0        |
| 0.001562 | 0.002806 | 0        | 0        | 0.001127 | 8.60E-05 | 5.00E-05 | 7.40E-05 | 0.001023 | 0.001773 | 0.008161 | 4.90E-04 | 0        | 0.001001 | 7.90E-05 |
| 0.001462 | 3.42E-04 | 0.003106 | 0.00169  | 1.07E-04 | 4.90E-05 | 8.15E-04 | 2.04E-04 | 3.80E-05 | 0.001505 | 2.73E-04 | 0        | 6.70E-05 | 0        | 9.30E-05 |
| 1.90E-05 | 0        | 0        | 8.10E-05 | 0        | 0.000649 | 6.04E-04 | 2.04E-04 | 0        | 0        | 5.69E-04 | 7.90E-04 | 5.90E-05 | 0        | 0        |
| 2.31E-04 | 0.001065 | 5.48E-04 | 0.004986 | 1.13E-04 | 1.55E-04 | 0        | 8.00E-05 | 0        | 4.90E-05 | 3.58E-04 | 0        | 1.18E-04 | 0        | 9.60E-05 |
| 2.30E-05 | 0        | 0        | 0        | 0        | 5.66E-04 | 3.78E-04 | 6.80E-05 | 0        | 0        | 2.45E-04 | 4.26E-04 | 8.30E-05 | 0        | 0        |
| 0        | 0        | 6.90E-05 | 0        | 0        | 0        | 8.60E-05 | 9.10E-05 | 0        | 0        | 0        | 4.30E-05 | 0        | 0        | 0        |
| 0.001084 | 9.15E-04 | 7.10E-05 | 0        | 9.38E-04 | 1.40E-05 | 0.003557 | 2.67E-04 | 0.008423 | 0.003779 | 0        | 0.003256 | 0        | 4.39E-04 | 5.59E-04 |
| 0        | 0        | 0        | 7.50E-05 | 6.10E-05 | 5.07E-04 | 2.89E-04 | 1.30E-04 | 0        | 0        | 2.41E-04 | 4.06E-04 | 6.10E-05 | 0        | 0        |
| 0        | 2.12E-04 | 0.001917 | 0        | 0        | 1.50E-05 | 1.43E-04 | 4.81E-04 | 0.001055 | 0        | 0.001035 | 6.62E-04 | 0        | 5.51E-04 | 0        |
| 0        | 0        | 0        | 0        | 0        | 0        | 0        | 3.20E-05 | 0        | 0        | 5.00E-05 | 5.60E-05 | 1.71E-04 | 0        | 0        |
| 0        | 1.95E-04 | 0.018354 | 5.59E-04 | 1.89E-04 | 0        | 0        | 3.20E-05 | 7.90E-05 | 0        | 0        | 0        | 0        | 0        | 0        |
| 3.04E-04 | 4.80E-05 | 0        | 0        | 0        | 2.38E-04 | 0        | 0        | 0        | 0        | 6.36E-04 | 0        | 0        | 0        | 0        |
| 5.41E-04 | 0        | 1.92E-04 | 0        | 0        | 2.00E-05 | 6.31E-04 | 1.23E-04 | 8.57E-04 | 0        | 9.57E-04 | 0.002875 | 0        | 7.70E-05 | 0        |
| 7.50E-05 | 0        | 0        | 0        | 0        | 0        | 4.60E-05 | 1.53E-04 | 0        | 0        | 1.63E-04 | 7.03E-04 | 3.30E-05 | 0        | 0        |
| 1.73E-04 | 0        | 0        | 0        | 0        | 0        | 4.70E-05 | 3.10E-05 | 0        | 5.70E-05 | 0        | 1.20E-05 | 0        | 0        | 0        |
| 0        | 0        | 0        | 0        | 0        | 0        | 0        | 0        | 0.013628 | 0        | 0        | 0        | 0        | 0        | 0        |
| 4.70E-05 | 0        | 0        | 0        | 0        | 1.90E-05 | 0        | 6.90E-05 | 0        | 0        | 1.50E-05 | 7.80E-05 | 5.20E-05 | 0        | 0        |
| 0.004609 | 0.006596 | 0.003656 | 0.006061 | 0.001644 | 0.002775 | 0.001664 | 0.010292 | 0.024413 | 0.001462 | 0.016741 | 0.008967 | 4.21E-04 | 0.003192 | 2.88E-04 |

| SP02     | SP21     | SP36     | SP13     | SP06     | SP33     | SP01     | SP16     |
|----------|----------|----------|----------|----------|----------|----------|----------|
| 0.013274 | 0.00969  | 0.008466 | 0.006839 | 0.0065   | 0.006233 | 0.00199  | 9.00E-04 |
| 0.814798 | 0.013392 | 0.554101 | 0.483885 | 0.554184 | 0.512281 | 0.302701 | 8.98E-04 |
| 3.73E-04 | 0.006707 | 0.072262 | 0.064611 | 0.010562 | 0.00518  | 0.374652 | 0.002119 |
| 0.001659 | 0.770731 | 0.023322 | 0.059249 | 0.028011 | 0.158058 | 0.030663 | 0.863198 |
| 0.001844 | 0.001324 | 0.032162 | 0.178109 | 0.246792 | 0.015646 | 0.001688 | 7.60E-05 |
| 0.067767 | 0.001216 | 0.012716 | 0.016311 | 0.003226 | 0.017714 | 0        | 3.27E-04 |
| 1.40E-04 | 0.064807 | 0.029297 | 0.002845 | 0.005161 | 0.117724 | 0.001016 | 0.107167 |
| 1.37E-04 | 0.036363 | 0.001023 | 0.00808  | 0.007701 | 0.012182 | 0.005082 | 0.014181 |
| 7.91E-04 | 1.50E-04 | 0.085926 | 0.001963 | 5.22E-04 | 2.31E-04 | 4.53E-04 | 9.80E-05 |
| 0.018994 | 0.013389 | 0.081184 | 0.062169 | 0.057358 | 0.005735 | 2.10E-05 | 1.56E-04 |
| 1.70E-04 | 7.45E-04 | 0.010218 | 0.003658 | 0.003514 | 0.052458 | 0.030267 | 1.37E-04 |
| 0.004403 | 0.043504 | 0.005324 | 0.024584 | 0.020622 | 0        | 1.60E-05 | 0.00506  |
| 2.57E-04 | 0        | 0.013378 | 0.00525  | 0.001411 | 0.001172 | 0        | 1.24E-04 |
| 4.20E-05 | 0        | 0        | 0        | 1.43E-04 | 0.027264 | 0.008257 | 9.00E-05 |
| 0.002283 | 0        | 0.01964  | 7.63E-04 | 9.89E-04 | 3.60E-04 | 2.50E-05 | 0        |
| 0        | 0        | 3.54E-04 | 7.28E-04 | 5.63E-04 | 1.37E-04 | 0        | 3.60E-05 |
| 0        | 0        | 0.001505 | 6.04E-04 | 6.14E-04 | 1.80E-05 | 1.90E-05 | 3.00E-05 |
| 0        | 6.10E-05 | 0.005384 | 0.002948 | 0.001617 | 7.10E-05 | 0        | 3.00E-05 |
| 0        | 0.013305 | 0        | 4.21E-04 | 8.81E-04 | 0        | 2.50E-05 | 0.003894 |
| 0.001317 | 0.001564 | 0.003884 | 0.003436 | 0.002051 | 8.60E-05 | 0        | 0        |
| 9.60E-05 | 0        | 0.002165 | 2.21E-04 | 6.04E-04 | 2.04E-04 | 2.30E-05 | 2.40E-05 |
| 0.051486 | 5.48E-04 | 0.001039 | 0.032908 | 0.008377 | 0.02024  | 2.90E-04 | 6.70E-05 |
| 4.00E-05 | 0.002482 | 0.003095 | 0.003037 | 6.99E-04 | 0        | 0        | 6.86E-04 |
| 0        | 0        | 0        | 0        | 0        | 1.30E-05 | 2.30E-05 | 0        |
| 0        | 0        | 4.13E-04 | 1.21E-04 | 0        | 0        | 0        | 2.80E-05 |
| 0.008449 | 8.20E-04 | 0.007387 | 0.016322 | 0.018017 | 0        | 0        | 0        |
| 0        | 0.009671 | 2.60E-04 | 0.002579 | 0.001023 | 4.60E-05 | 6.50E-05 | 9.10E-05 |
| 5.74E-04 | 1.14E-04 | 9.14E-04 | 1.27E-04 | 0.004406 | 1.10E-05 | 0        | 5.30E-05 |
| 0        | 1.04E-04 | 1.61E-04 | 5.70E-05 | 0        | 8.90E-05 | 7.50E-05 | 1.10E-04 |
| 0        | 0        | 6.20E-05 | 0        | 7.20E-05 | 0        | 1.40E-04 | 3.70E-05 |
| 4.00E-05 | 0        | 4.30E-05 | 0        | 0        | 0        | 0        | 0        |
| 0.00791  | 0.001383 | 0.003004 | 0.011229 | 0.009686 | 0        | 0        | 3.20E-05 |
| 0        | 0        | 0        | 0        | 0        | 1.50E-05 | 3.80E-05 | 0        |
| 1.41E-04 | 0        | 6.80E-05 | 1.13E-04 | 7.20E-05 | 0        | 3.50E-05 | 3.20E-05 |
| 0        | 0        | 0.003537 | 1.20E-04 | 0        | 9.50E-05 | 0        | 0        |
| 7.40E-05 | 4.10E-05 | 0.001554 | 1.56E-04 | 0        | 7.60E-05 | 0.001923 | 5.00E-05 |
| 0        | 5.50E-05 | 0        | 5.10E-05 | 0        | 4.02E-04 | 0        | 0        |
| 0        | 0.00158  | 0.002955 | 1.86E-04 | 4.81E-04 | 0.010046 | 0.134321 | 2.40E-05 |
| 0        | 0        | 4.02E-04 | 6.00E-05 | 0        | 0.001401 | 2.10E-05 | 0        |
| 4.00E-05 | 0        | 1.05E-04 | 0        | 0        | 0        | 0        | 0        |
| 0        | 0.002601 | 5.05E-04 | 8.12E-04 | 6.13E-04 | 0        | 0        | 0        |
| 0        | 0        | 0        | 0        | 0        | 0.001348 | 2.94E-04 | 3.40E-05 |
| 0        | 0.002274 | 0        | 7.51E-04 | 3.46E-04 | 0        | 0        | 1.42E-04 |
| 0        | 0        | 0        | 0        | 0        | 0.001243 | 7.09E-04 | 0        |
| 8.50E-05 | 0        | 0        | 0        | 0        | 0        | 0        | 0        |
| 0.001707 | 0        | 4.13E-04 | 0.001315 | 7.46E-04 | 2.00E-05 | 0.020085 | 3.30E-05 |
| 0        | 0        | 0        | 0        | 0        | 0.001005 | 4.18E-04 | 3.60E-05 |
| 1.40E-04 | 0        | 0.004832 | 1.75E-04 | 6.50E-05 | 0        | 0        | 0        |
| 0        | 0        | 0        | 0        | 0        | 2.75E-04 | 1.26E-04 | 0        |
| 0        | 0        | 4.60E-05 | 0        | 7.70E-05 | 0        | 0        | 0        |
| 0        | 5.60E-05 | 2.80E-05 | 6.00E-05 | 0        | 3.60E-05 | 0.057925 | 0        |
| 0        | 0        | 8.29E-04 | 6.10E-05 | 6.60E-05 | 1.77E-04 | 1.80E-05 | 0        |
| 0        | 6.40E-05 | 7.30E-05 | 6.90E-05 | 0        | 0.00336  | 0        | 0        |
| 0        | 6.80E-05 | 0        | 0        | 1.46E-04 | 0        | 0.022988 | 0        |
| 0        | 0        | 0        | 0        | 0        | 0        | 0        | 0        |
| 0        | 0        | 0        | 0        | 0        | 1.20E-05 | 0        | 0        |
| 9.69E-04 | 0.001191 | 0.005964 | 0.003017 | 0.002082 | 0.027336 | 0.003608 | 0        |

| The abundance and composition at phylum level of each sample among CP (n=72), SP (n=37), and HC (n=150) groups. |          |          |          |          |          |          |          |          |          |          |          |          |
|-----------------------------------------------------------------------------------------------------------------|----------|----------|----------|----------|----------|----------|----------|----------|----------|----------|----------|----------|
| ID                                                                                                              | CP41     | CP34     | CP04     | CP66     | CP70     | CP69     | CP02     | CP49     | CP25     | CP71     | CP60     | CP29     |
| Bacteroidetes                                                                                                   | 0.965714 | 0.895192 | 0.889363 | 0.827956 | 0.682647 | 0.665997 | 0.628216 | 0.581694 | 0.557189 | 0.5547   | 0.505731 | 0.426072 |
| Firmicutes                                                                                                      | 0.024027 | 0.018771 | 0.022598 | 0.057528 | 0.092962 | 0.261312 | 0.240143 | 0.246951 | 0.186538 | 0.313522 | 0.459238 | 0.550191 |
| Proteobacteria                                                                                                  | 3.58E-04 | 6.83E-04 | 0.001006 | 0.001624 | 0.010973 | 0.001364 | 0.001824 | 0.012863 | 0.089651 | 0.007199 | 0.002062 | 0.00295  |
| Actinobacteria                                                                                                  | 0.008035 | 0.084162 | 8.37E-04 | 0.10323  | 0.014359 | 0.047078 | 0.116379 | 0.108703 | 0.127065 | 0.099308 | 0.02699  | 0.013175 |
| Fusobacteria                                                                                                    | 0.001402 | 2.86E-04 | 0.086078 | 0.001144 | 0.198664 | 0.020859 | 0.00791  | 0.029184 | 0.009636 | 0.017947 | 6.54E-04 | 0.003158 |
| Bacteria_unclassified                                                                                           | 4.64E-04 | 6.56E-04 | 1.18E-04 | 0.002534 | 9.90E-05 | 0.002995 | 0.00545  | 0.001366 | 0.024143 | 0.00203  | 0.005325 | 0.004454 |
| Candidate_division_TM7                                                                                          | 0        | 2.50E-04 | 0        | 0.005953 | 1.53E-04 | 2.93E-04 | 7.80E-05 | 0.01742  | 0.005778 | 0.005279 | 0        | 0        |
| Candidate_division_SR1                                                                                          | 0        | 0        | 0        | 0        | 0        | 1.02E-04 | 0        | 0.001607 | 0        | 0        | 0        | 0        |
| Cyanobacteria                                                                                                   | 0        | 0        | 0        | 3.10E-05 | 5.50E-05 | 0        | 0        | 1.74E-04 | 0        | 0        | 0        | 0        |
| Spirochaetae                                                                                                    | 0        | 0        | 0        | 0        | 4.20E-05 | 0        | 0        | 1.90E-05 | 0        | 0        | 0        | 0        |
| Tenericutes                                                                                                     | 0        | 0        | 0        | 0        | 0        | 0        | 0        | 0        | 0        | 1.50E-05 | 0        | 0        |
| BD1-5                                                                                                           | 0        | 0        | 0        | 0        | 0        | 0        | 0        | 0        | 0        | 0        | 0        | 0        |
| Synergistetes                                                                                                   | 0        | 0        | 0        | 0        | 3.10E-05 | 0        | 0        | 0        | 0        | 0        | 0        | 0        |
| Verrucomicrobia                                                                                                 | 0        | 0        | 0        | 0        | 1.50E-05 | 0        | 0        | 1.90E-05 | 0        | 0        | 0        | 0        |
| Chloroflexi                                                                                                     | 0        | 0        | 0        | 0        | 0        | 0        | 0        | 0        | 0        | 0        | 0        | 0        |
| Deinococcus-Thermus                                                                                             | 0        | 0        | 0        | 0        | 0        | 0        | 0        | 0        | 0        | 0        | 0        | 0        |
| Candidate_division_WS6                                                                                          | 0        | 0        | 0        | 0        | 0        | 0        | 0        | 0        | 0        | 0        | 0        | 0        |
| Planctomycetes                                                                                                  | 0        | 0        | 0        | 0        | 0        | 0        | 0        | 0        | 0        | 0        | 0        | 0        |
| Lentisphaerae                                                                                                   | 0        | 0        | 0        | 0        | 0        | 0        | 0        | 0        | 0        | 0        | 0        | 0        |

| CP05     | CP64     | CP45     | CP55     | CP43     | CP40     | CP32     | CP15     | CP20     | CP50     | CP28     | CP31     | CP53     | CP35     | CP14     |
|----------|----------|----------|----------|----------|----------|----------|----------|----------|----------|----------|----------|----------|----------|----------|
| 0.406875 | 0.396484 | 0.383231 | 0.362168 | 0.353238 | 0.349477 | 0.349127 | 0.334932 | 0.317053 | 0.310648 | 0.309    | 0.303943 | 0.287852 | 0.270659 | 0.265205 |
| 0.160054 | 0.202106 | 0.344721 | 0.394096 | 0.327211 | 0.419751 | 0.075598 | 0.420462 | 0.26724  | 0.356781 | 0.133261 | 0.252672 | 0.149705 | 0.563688 | 0.272316 |
| 0.135894 | 0.069534 | 0.027485 | 0.091192 | 0.00254  | 0.001553 | 0.398994 | 0.021792 | 0.019984 | 0.005424 | 0.016214 | 0.084721 | 0.385035 | 0.099942 | 0.086894 |
| 0.172883 | 0.077831 | 0.005724 | 0.068582 | 0.173112 | 0.200246 | 0.014927 | 0.027022 | 0.008639 | 0.320707 | 0.022408 | 0.028851 | 0.046112 | 0.063931 | 0.115127 |
| 0.095833 | 0.105975 | 0.229602 | 0.05946  | 0.133119 | 0.020156 | 0.149155 | 0.152747 | 0.374739 | 0.002927 | 0.51501  | 0.317266 | 0.110237 | 5.70E-04 | 0.220351 |
| 0.028333 | 0.001977 | 0.006486 | 0.020026 | 0.009078 | 0.008688 | 0.011595 | 0.017836 | 0.001893 | 0.003405 | 0.003431 | 0.012402 | 0.007079 | 9.28E-04 | 0.00954  |
| 0        | 0.14606  | 0.002671 | 0.004177 | 0.001702 | 1.29E-04 | 6.04E-04 | 0.002139 | 0.010146 | 0        | 6.00E-04 | 7.10E-05 | 0.012257 | 1.03E-04 | 0.024375 |
| 1.28E-04 | 3.30E-05 | 0        | 2.99E-04 | 0        | 0        | 0        | 0.02307  | 1.79E-04 | 0        | 0        | 7.40E-05 | 0.001276 | 0        | 0.006124 |
| 0        | 0        | 0        | 0        | 0        | 0        | 0        | 0        | 0        | 7.20E-05 | 7.60E-05 | 0        | 0        | 1.17E-04 | 0        |
| 0        | 0        | 5.30E-05 | 0        | 0        | 0        | 0        | 0        | 8.70E-05 | 3.60E-05 | 0        | 0        | 0        | 0        | 6.80E-05 |
| 0        | 0        | 2.70E-05 | 0        | 0        | 0        | 0        | 0        | 0        | 0        | 0        | 0        | 1.25E-04 | 0        | 0        |
| 0        | 0        | 0        | 0        | 0        | 0        | 0        | 0        | 0        | 0        | 0        | 0        | 3.22E-04 | 1.70E-05 | 0        |
| 0        | 0        | 0        | 0        | 0        | 0        | 0        | 0        | 4.00E-05 | 0        | 0        | 0        | 0        | 4.50E-05 | 0        |
| 0        | 0        | 0        | 0        | 0        | 0        | 0        | 0        | 0        | 0        | 0        | 0        | 0        | 0        | 0        |
| 0        | 0        | 0        | 0        | 0        | 0        | 0        | 0        | 0        | 0        | 0        | 0        | 0        | 0        | 0        |
| 0        | 0        | 0        | 0        | 0        | 0        | 0        | 0        | 0        | 0        | 0        | 0        | 0        | 0        | 0        |
| 0        | 0        | 0        | 0        | 0        | 0        | 0        | 0        | 0        | 0        | 0        | 0        | 0        | 0        | 0        |
| 0        | 0        | 0        | 0        | 0        | 0        | 0        | 0        | 0        | 0        | 0        | 0        | 0        | 0        | 0        |
| 0        | 0        | 0        | 0        | 0        | 0        | 0        | 0        | 0        | 0        | 0        | 0        | 0        | 0        | 0        |

| CP03     | CP57     | CP33     | CP61     | CP36     | CP09     | CP11     | CP62     | CP27     | CP68     | CP67     | CP22     | CP30     | CP16     | CP10     |
|----------|----------|----------|----------|----------|----------|----------|----------|----------|----------|----------|----------|----------|----------|----------|
| 0.25249  | 0.242937 | 0.24198  | 0.233412 | 0.227626 | 0.204191 | 0.203303 | 0.200714 | 0.18468  | 0.17734  | 0.174117 | 0.171243 | 0.157015 | 0.14425  | 0.127379 |
| 0.539068 | 0.184107 | 0.229534 | 0.222223 | 0.396594 | 0.206346 | 0.351965 | 0.256196 | 0.225649 | 0.437284 | 0.491493 | 0.413994 | 0.504561 | 0.30916  | 0.060942 |
| 0.00782  | 0.458437 | 0.029627 | 0.288963 | 0.00542  | 0.125914 | 0.127944 | 0.230632 | 0.262191 | 0.007488 | 0.179873 | 0.085011 | 0.165792 | 0.182283 | 0.68449  |
| 0.086837 | 0.068862 | 0.480239 | 0.033474 | 0.264682 | 0.176431 | 0.26605  | 0.109996 | 0.149928 | 0.360934 | 0.09679  | 0.203317 | 0.075851 | 0.071991 | 0.010049 |
| 0.099    | 0.02427  | 0.007348 | 0.202206 | 0.096016 | 0.279603 | 0.033217 | 0.140374 | 0.145764 | 0.001615 | 0.048534 | 0.082359 | 0.039677 | 0.266829 | 0.093269 |
| 0.00228  | 0.019487 | 0.010763 | 0.005195 | 0.007661 | 0.00532  | 0.015643 | 0.004174 | 0.027051 | 0.001746 | 3.30E-05 | 0.026235 | 5.48E-04 | 0.012446 | 0.023871 |
| 0.01179  | 0.00127  | 5.09E-04 | 0.009371 | 0.001546 | 0.00216  | 0.001878 | 0.056142 | 0.004737 | 0.012472 | 1.08E-04 | 0.007118 | 0.056539 | 0.013041 | 0        |
| 1.70E-05 | 6.30E-04 | 0        | 0.003034 | 0        | 0        | 0        | 0.001525 | 0        | 2.30E-05 | 0        | 0.010577 | 0        | 0        | 0        |
| 4.00E-04 | 0        | 0        | 0        | 6.80E-05 | 0        | 0        | 0        | 0        | 2.50E-05 | 0.008835 | 0        | 0        | 0        | 0        |
| 1.44E-04 | 0        | 0        | 0.001773 | 2.86E-04 | 3.50E-05 | 0        | 0        | 0        | 6.50E-05 | 7.90E-05 | 7.80E-05 | 0        | 0        | 0        |
| 0        | 0        | 0        | 6.70E-05 | 0        | 0        | 0        | 1.97E-04 | 0        | 0        | 1.30E-05 | 6.80E-05 | 1.70E-05 | 0        | 0        |
| 0        | 0        | 0        | 3.20E-05 | 0        | 0        | 0        | 5.00E-05 | 0        | 0        | 0        | 0        | 0        | 0        | 0        |
| 1.54E-04 | 0        | 0        | 2.23E-04 | 1.01E-04 | 0        | 0        | 0        | 0        | 7.98E-04 | 1.25E-04 | 0        | 0        | 0        | 0        |
| 0        | 0        | 0        | 0        | 0        | 0        | 0        | 0        | 0        | 0        | 0        | 0        | 0        | 0        | 0        |
| 0        | 0        | 0        | 0        | 0        | 0        | 0        | 0        | 0        | 2.10E-04 | 0        | 0        | 0        | 0        | 0        |
| 0        | 0        | 0        | 0        | 0        | 0        | 0        | 0        | 0        | 0        | 0        | 0        | 0        | 0        | 0        |
| 0        | 0        | 0        | 2.70E-05 | 0        | 0        | 0        | 0        | 0        | 0        | 0        | 0        | 0        | 0        | 0        |
| 0        | 0        | 0        | 0        | 0        | 0        | 0        | 0        | 0        | 0        | 0        | 0        | 0        | 0        | 0        |
| 0        | 0        | 0        | 0        | 0        | 0        | 0        | 0        | 0        | 0        | 0        | 0        | 0        | 0        | 0        |

| CP17     | CP26     | CP51     | CP52     | CP48     | CP38     | CP42     | CP37     | CP24     | CP56     | CP44     | CP39     | CP63     | CP12     | CP59     |
|----------|----------|----------|----------|----------|----------|----------|----------|----------|----------|----------|----------|----------|----------|----------|
| 0.114789 | 0.106744 | 0.106717 | 0.101943 | 0.09953  | 0.099044 | 0.085633 | 0.084446 | 0.084216 | 0.080375 | 0.079991 | 0.07386  | 0.069112 | 0.068868 | 0.063605 |
| 0.093761 | 0.562381 | 0.194974 | 0.314798 | 0.127238 | 0.268842 | 0.413483 | 0.692673 | 0.485968 | 0.084625 | 0.170853 | 0.33961  | 0.157441 | 0.06261  | 0.07753  |
| 0.024771 | 0.217494 | 0.420443 | 0.00732  | 0.143707 | 0.003504 | 0.215309 | 0.035682 | 0.030237 | 0.690211 | 0.441171 | 0.002798 | 0.274507 | 0.774699 | 0.744234 |
| 0.071449 | 0.090188 | 0.05026  | 0.029705 | 0.087859 | 0.608612 | 0.212454 | 0.173301 | 0.358123 | 0.014036 | 0.057451 | 0.32368  | 0.067853 | 0.014623 | 0.063441 |
| 0.682347 | 0.008634 | 0.219562 | 0.518899 | 0.532094 | 7.60E-05 | 0.041455 | 0.002157 | 0.013947 | 0.105914 | 0.228036 | 0.237117 | 0.426948 | 0.060512 | 0.045636 |
| 0.010051 | 0.006836 | 1.10E-05 | 4.53E-04 | 0.008626 | 0.019922 | 0.029343 | 0.008526 | 0.012037 | 0.023731 | 0.022231 | 0.020399 | 0.002425 | 0.017078 | 0.003262 |
| 0.002488 | 0.007723 | 0.006757 | 0.026843 | 7.94E-04 | 0        | 0.002323 | 0        | 0.01536  | 8.57E-04 | 1.36E-04 | 0.002536 | 0.001714 | 0.001242 | 0.002228 |
| 2.78E-04 | 0        | 0        | 0        | 0        | 0        | 0        | 0        | 2.80E-05 | 2.51E-04 | 0        | 0        | 0        | 3.09E-04 | 6.40E-05 |
| 0        | 0        | 7.95E-04 | 3.90E-05 | 0        | 0        | 0        | 0.003215 | 0        | 0        | 0        | 0        | 0        | 0        | 0        |
| 0        | 0        | 2.65E-04 | 0        | 1.52E-04 | 0        | 0        | 0        | 0        | 0        | 0        | 0        | 0        | 0        | 0        |
| 6.60E-05 | 0        | 1.52E-04 | 0        | 0        | 0        | 0        | 0        | 3.10E-05 | 0        | 1.31E-04 | 0        | 0        | 5.90E-05 | 0        |
| 0        | 0        | 0        | 0        | 0        | 0        | 0        | 0        | 0        | 0        | 0        | 0        | 0        | 0        | 0        |
| 0        | 0        | 6.40E-05 | 0        | 0        | 0        | 0        | 0        | 5.30E-05 | 0        | 0        | 0        | 0        | 0        | 0        |
| 0        | 0        | 0        | 0        | 0        | 0        | 0        | 0        | 0        | 0        | 0        | 0        | 0        | 0        | 0        |
| 0        | 0        | 0        | 0        | 0        | 0        | 0        | 0        | 0        | 0        | 0        | 0        | 0        | 0        | 0        |
| 0        | 0        | 0        | 0        | 0        | 0        | 0        | 0        | 0        | 0        | 0        | 0        | 0        | 0        | 0        |
| 0        | 0        | 0        | 0        | 0        | 0        | 0        | 0        | 0        | 0        | 0        | 0        | 0        | 0        | 0        |
| 0        | 0        | 0        | 0        | 0        | 0        | 0        | 0        | 0        | 0        | 0        | 0        | 0        | 0        | 0        |
| 0        | 0        | 0        | 0        | 0        | 0        | 0        | 0        | 0        | 0        | 0        | 0        | 0        | 0        | 0        |

| CP47     | CP72     | CP18     | CP19     | CP06     | CP13     | CP21     | CP46     | CP01     | CP54     | CP07     | CP58     | CP65     | CP08     | CP23     |
|----------|----------|----------|----------|----------|----------|----------|----------|----------|----------|----------|----------|----------|----------|----------|
| 0.058291 | 0.056088 | 0.053052 | 0.050497 | 0.04419  | 0.039257 | 0.036828 | 0.033417 | 0.025417 | 0.021339 | 0.020843 | 0.015646 | 0.007477 | 0.003929 | 0.002088 |
| 0.138672 | 0.754013 | 0.528566 | 0.082439 | 0.465193 | 0.409991 | 0.029874 | 0.137091 | 0.17874  | 0.057529 | 0.503202 | 0.033042 | 0.014495 | 0.105233 | 0.989183 |
| 0.037396 | 0.006772 | 0.061063 | 0.78448  | 0.211829 | 0.004366 | 0.844666 | 0.076022 | 0.001857 | 0.832359 | 0.006237 | 0.886119 | 0.946485 | 0.059287 | 6.95E-04 |
| 0.004693 | 0.123273 | 0.31794  | 0.011708 | 0.11531  | 0.504732 | 0.01794  | 0.114593 | 0.773902 | 0.019267 | 0.086995 | 0.005563 | 0.003865 | 0.537463 | 7.02E-04 |
| 0.755296 | 0.035953 | 0.014687 | 0.047535 | 0.155738 | 0.013866 | 0.05777  | 0.63232  | 0.008358 | 0.030629 | 0.356825 | 0.039632 | 0.025049 | 0.291119 | 0.007162 |
| 0.004904 | 0.004032 | 0.017955 | 0.02256  | 0.006282 | 0.026285 | 0.011855 | 0.005695 | 0.011658 | 0.035367 | 0.025898 | 0.019785 | 0.002513 | 0.002489 | 7.50E-05 |
| 7.09E-04 | 0.01977  | 0.005509 | 6.06E-04 | 3.91E-04 | 0.001444 | 5.67E-04 | 8.07E-04 | 3.60E-05 | 0.003214 |          | 0        | 2.13E-04 | 1.16E-04 | 8.20E-05 |
|          | 0        | 4.58E-04 | 1.75E-04 | 1.22E-04 | 0        | 4.43E-04 | 0        | 0        | 1.42E-04 |          | 0        | 0        | 0        | 3.10E-05 |
| 3.90E-05 | 0        | 5.50E-05 | 0        | 9.45E-04 | 0        | 0        | 2.80E-05 | 3.20E-05 | 0        | 0        | 0        | 0        | 2.42E-04 | 0        |
| 0        | 7.40E-05 | 4.95E-04 | 0        | 0        | 0        | 5.70E-05 | 0        | 0        | 1.54E-04 | 0        | 0        | 0        | 0        | 0        |
| 0        | 2.50E-05 | 0        | 0        | 0        | 0        | 0        | 0        | 0        | 0        | 0        | 0        | 0        | 0        | 0        |
| 0        | 0        | 0        | 0        | 0        | 0        | 0        | 0        | 0        | 0        | 0        | 0        | 0        | 0        | 0        |
| 0        | 0        | 2.20E-04 | 0        | 0        | 5.90E-05 | 0        | 0        | 0        | 0        | 0        | 0        | 0        | 0        | 0        |
| 0        | 0        | 0        | 0        | 0        | 0        | 0        | 2.70E-05 | 0        | 0        | 0        | 0        | 0        | 0        | 0        |
| 0        | 0        | 0        | 0        | 0        | 0        | 0        | 0        | 0        | 0        | 0        | 0        | 0        | 0        | 0        |
| 0        | 0        | 0        | 0        | 0        | 0        | 0        | 0        | 0        | 0        | 0        | 0        | 0        | 1.56E-04 | 0        |
| 0        | 0        | 0        | 0        | 0        | 0        | 0        | 0        | 0        | 0        | 0        | 0        | 0        | 0        | 0        |
| 0        | 0        | 0        | 0        | 0        | 0        | 0        | 0        | 0        | 0        | 0        | 0        | 0        | 0        | 0        |
| 0        | 0        | 0        | 0        | 0        | 0        | 0        | 0        | 0        | 0        | 0        | 0        | 0        | 0        | 0        |

| HC119    | HC121    | HC128    | HC061    | HC020    | HC056    | HC064    | HC146    | HC041    | HC050    | HC043    | HC080    | HC147    | HC036    | HC013    |
|----------|----------|----------|----------|----------|----------|----------|----------|----------|----------|----------|----------|----------|----------|----------|
| 0.757387 | 0.735774 | 0.666253 | 0.646821 | 0.619759 | 0.617469 | 0.615198 | 0.599068 | 0.554645 | 0.546794 | 0.532562 | 0.52304  | 0.521851 | 0.521534 | 0.521178 |
| 0.161443 | 0.167973 | 0.193298 | 0.174265 | 0.277595 | 0.224589 | 0.167539 | 0.113434 | 0.235909 | 0.185685 | 0.231841 | 0.216169 | 0.180871 | 0.323921 | 0.306235 |
| 0.007075 | 0.019454 | 0.058342 | 0.007855 | 0.034312 | 0.04332  | 0.056131 | 0.130659 | 0.101826 | 0.049736 | 0.034841 | 0.100137 | 0.070467 | 0.003599 | 0.024242 |
| 0.047844 | 0.043663 | 0.058496 | 0.14658  | 0.043146 | 0.046382 | 0.14241  | 0.03677  | 0.062832 | 0.136128 | 0.137671 | 0.043162 | 0.02877  | 0.124077 | 0.087145 |
| 0.013698 | 0.018121 | 0.001113 | 0.013618 | 0.011466 | 0.048708 | 0.001042 | 0.111516 | 0.026276 | 0.071303 | 0.029003 | 0.097837 | 0.177015 | 0.001675 | 0.053975 |
| 0.003508 | 0.006007 | 0.018562 | 0.008339 | 0.006969 | 0.00893  | 0.012523 | 0.002111 | 0.01788  | 0.007694 | 0.006504 | 0.006436 | 0.012256 | 0.004687 | 0.002779 |
| 0.008878 | 0.008997 | 0.00324  | 0.002522 | 0.006753 | 0.007217 | 0.005089 | 0.006245 | 6.32E-04 | 0.002161 | 0.027553 | 0.008675 | 0.00734  | 0.020476 | 0.004446 |
| 9.30E-05 | 1.10E-05 | 6.08E-04 | 0        | 0        | 0.003316 | 6.80E-05 | 1.38E-04 | 0        | 4.14E-04 | 0        | 0.004489 | 0.001405 | 0        | 0        |
| 0        | 0        | 0        | 0        | 0        | 0        | 0        | 0        | 0        | 0        | 0        | 0        | 0        | 3.10E-05 | 0        |
| 0        | 0        | 0        | 0        | 0        | 0        | 0        | 0        | 0        | 0        | 0        | 0        | 0        | 0        | 0        |
| 0        | 0        | 4.70E-05 | 0        | 0        | 0        | 0        | 0        | 0        | 8.50E-05 | 0        | 5.50E-05 | 2.50E-05 | 0        | 0        |
| 2.10E-05 | 0        | 0        | 0        | 0        | 2.20E-05 | 0        | 0        | 0        | 0        | 0        | 0        | 0        | 0        | 0        |
| 5.30E-05 | 0        | 4.10E-05 | 0        | 0        | 4.70E-05 | 0        | 5.90E-05 | 0        | 0        | 0        | 0        | 0        | 0        | 0        |
| 0        | 0        | 0        | 0        | 0        | 0        | 0        | 0        | 0        | 0        | 2.50E-05 | 0        | 0        | 0        | 0        |
| 0        | 0        | 0        | 0        | 0        | 0        | 0        | 0        | 0        | 0        | 0        | 0        | 0        | 0        | 0        |
| 0        | 0        | 0        | 0        | 0        | 0        | 0        | 0        | 0        | 0        | 0        | 0        | 0        | 0        | 0        |
| 0        | 0        | 0        | 0        | 0        | 0        | 0        | 0        | 0        | 0        | 0        | 0        | 0        | 0        | 0        |
| 0        | 0        | 0        | 0        | 0        | 0        | 0        | 0        | 0        | 0        | 0        | 0        | 0        | 0        | 0        |
| 0        | 0        | 0        | 0        | 0        | 0        | 0        | 0        | 0        | 0        | 0        | 0        | 0        | 0        | 0        |

| HC091    | HC118    | HC086    | HC040    | HC137    | HC138    | HC069    | HC046    | HC115    | HC033    | HC057    | HC003    | HC099    | HC074    | HC122    |
|----------|----------|----------|----------|----------|----------|----------|----------|----------|----------|----------|----------|----------|----------|----------|
| 0.5105   | 0.506213 | 0.497596 | 0.497249 | 0.493032 | 0.490596 | 0.485159 | 0.477246 | 0.473334 | 0.471284 | 0.470466 | 0.46136  | 0.457632 | 0.455978 | 0.453289 |
| 0.250474 | 0.155322 | 0.215834 | 0.101645 | 0.179618 | 0.136535 | 0.306789 | 0.326355 | 0.177186 | 0.304719 | 0.073308 | 0.202839 | 0.31736  | 0.166884 | 0.28844  |
| 0.150719 | 0.133015 | 0.136077 | 0.092667 | 0.041232 | 0.140995 | 0.031062 | 0.015585 | 0.10861  | 0.047271 | 0.15929  | 0.021886 | 0.087237 | 0.219751 | 0.057349 |
| 0.05631  | 0.052935 | 0.080772 | 0.021086 | 0.0526   | 0.036573 | 0.06994  | 0.097313 | 0.028358 | 0.048367 | 0.008912 | 0.269241 | 0.098293 | 0.086749 | 0.097914 |
| 0.015305 | 0.126551 | 0.038026 | 0.247863 | 0.207976 | 0.154609 | 0.093542 | 0.050167 | 0.16263  | 0.061527 | 0.263163 | 0.018245 | 0.012087 | 0.033772 | 0.083097 |
| 0.013319 | 0.018079 | 0.02383  | 0.005392 | 0.003593 | 0.012787 | 0.004298 | 0.011088 | 0.004765 | 0.003502 | 0.010156 | 0.013377 | 0.026484 | 0.016074 | 0.009505 |
| 0.003296 | 0.006961 | 0.00586  | 0.010393 | 0.017763 | 0.015333 | 0.009182 | 0.022118 | 0.045037 | 0.001015 | 0.004116 | 0.0121   | 9.07E-04 | 0.004472 | 0.008088 |
| 0        | 9.24E-04 | 0.001868 | 0.023687 | 0.003724 | 0.011992 | 0        | 6.40E-05 | 8.00E-05 | 0.06221  | 0.010565 | 9.10E-04 | 0        | 0.016238 | 0.002299 |
| 7.70E-05 | 0        | 1.37E-04 | 0        | 0        | 0        | 0        | 0        | 0        | 0        | 0        | 0        | 0        | 0        | 0        |
| 0        | 0        | 0        | 0        | 3.30E-05 | 7.40E-05 | 0        | 0        | 0        | 3.70E-05 | 0        | 0        | 0        | 0        | 0        |
| 0        | 0        | 0        | 0        | 4.29E-04 | 5.06E-04 | 0        | 3.80E-05 | 0        | 2.60E-05 | 2.40E-05 | 4.20E-05 | 0        | 4.70E-05 | 0        |
| 0        | 0        | 0        | 1.80E-05 | 0        | 0        | 2.80E-05 | 0        | 0        | 4.20E-05 | 0        | 0        | 0        | 3.50E-05 | 1.90E-05 |
| 0        | 0        | 0        | 0        | 0        | 0        | 0        | 0        | 0        | 0        | 0        | 0        | 0        | 0        | 0        |
| 0        | 0        | 0        | 0        | 0        | 0        | 0        | 2.60E-05 | 0        | 0        | 0        | 0        | 0        | 0        | 0        |
| 0        | 0        | 0        | 0        | 0        | 0        | 0        | 0        | 0        | 0        | 0        | 0        | 0        | 0        | 0        |
| 0        | 0        | 0        | 0        | 0        | 0        | 0        | 0        | 0        | 0        | 0        | 0        | 0        | 0        | 0        |
| 0        | 0        | 0        | 0        | 0        | 0        | 0        | 0        | 0        | 0        | 0        | 0        | 0        | 0        | 0        |
| 0        | 0        | 0        | 0        | 0        | 0        | 0        | 0        | 0        | 0        | 0        | 0        | 0        | 0        | 0        |
| 0        | 0        | 0        | 0        | 0        | 0        | 0        | 0        | 0        | 0        | 0        | 0        | 0        | 0        | 0        |
| 0        | 0        | 0        | 0        | 0        | 0        | 0        | 0        | 0        | 0        | 0        | 0        | 0        | 0        | 0        |

| HC114    | HC039    | HC120    | HC011    | HC005    | HC083    | HC001    | HC092    | HC047    | HC051    | HC090    | HC030    | HC132    | HC072    | HC052    |
|----------|----------|----------|----------|----------|----------|----------|----------|----------|----------|----------|----------|----------|----------|----------|
| 0.437128 | 0.436451 | 0.431105 | 0.427245 | 0.426254 | 0.426056 | 0.406366 | 0.404738 | 0.400201 | 0.398042 | 0.397116 | 0.39684  | 0.39659  | 0.395457 | 0.386062 |
| 0.094103 | 0.238779 | 0.159569 | 0.229191 | 0.241795 | 0.317539 | 0.127631 | 0.214491 | 0.349993 | 0.208449 | 0.065047 | 0.160142 | 0.459122 | 0.303246 | 0.306352 |
| 0.15659  | 0.010477 | 0.200952 | 0.163909 | 0.066871 | 0.067737 | 0.317626 | 0.043381 | 0.04491  | 0.30481  | 0.302274 | 0.339013 | 0.002939 | 0.164617 | 0.100473 |
| 0.017523 | 0.031675 | 0.04385  | 0.047067 | 0.210761 | 0.137595 | 0.065281 | 0.263613 | 0.109683 | 0.034411 | 0.059516 | 0.047458 | 0.125711 | 0.061658 | 0.149967 |
| 0.277103 | 0.251556 | 0.1426   | 0.103399 | 0.022122 | 0.016536 | 0.041745 | 0.027156 | 0.070853 | 0.03139  | 0.140045 | 0.041683 | 7.83E-04 | 0.043594 | 0.044015 |
| 0.008624 | 0.004542 | 0.018881 | 0.004295 | 0.010892 | 0.028876 | 0.01311  | 0.005165 | 0.017337 | 0.017629 | 0.010462 | 0.008917 | 0.012357 | 0.005774 | 0.006808 |
| 0.004566 | 0.025775 | 0.00115  | 0.012509 | 0.020442 | 0.003499 | 0.010975 | 0.032515 | 0.006005 | 0.002655 | 0.016515 | 0.005505 | 0.002498 | 0.009174 | 0.004809 |
| 0.003682 | 5.69E-04 | 0.001852 | 0.012304 | 8.63E-04 | 0.002107 | 0.017045 | 0.008592 | 9.79E-04 | 0.002586 | 0.009025 | 4.42E-04 | 0        | 0.011504 | 0.001323 |
| 0        | 2.90E-05 | 0        | 0        | 0        | 0        | 0        | 0        | 0        | 0        | 0        | 0        | 0        | 0        | 1.22E-04 |
| 1.31E-04 | 1.12E-04 | 0        | 2.70E-05 | 0        | 0        | 0        | 0        | 0        | 2.80E-05 | 0        | 0        | 0        | 0.004052 | 0        |
| 5.50E-04 | 0        | 0        | 5.40E-05 | 0        | 5.50E-05 | 3.20E-05 | 1.48E-04 | 3.90E-05 | 0        | 0        | 0        | 0        | 7.80E-04 | 0        |
| 0        | 0        | 0        | 0        | 0        | 0        | 1.89E-04 | 1.59E-04 | 0        | 0        | 0        | 0        | 0        | 0        | 5.30E-05 |
| 0        | 3.50E-05 | 4.10E-05 | 0        | 0        | 0        | 0        | 4.20E-05 | 0        | 0        | 0        | 0        | 0        | 1.24E-04 | 1.60E-05 |
| 0        | 0        | 0        | 0        | 0        | 0        | 0        | 0        | 0        | 0        | 0        | 0        | 0        | 0        | 0        |
| 0        | 0        | 0        | 0        | 0        | 0        | 0        | 0        | 0        | 0        | 0        | 0        | 0        | 0        | 0        |
| 0        | 0        | 0        | 0        | 0        | 0        | 0        | 0        | 0        | 0        | 0        | 0        | 0        | 0        | 0        |
| 0        | 0        | 0        | 0        | 0        | 0        | 0        | 0        | 0        | 0        | 0        | 0        | 0        | 0        | 0        |
| 0        | 0        | 0        | 0        | 0        | 0        | 0        | 0        | 0        | 0        | 0        | 0        | 0        | 2.00E-05 | 0        |
| 0        | 0        | 0        | 0        | 0        | 0        | 0        | 0        | 0        | 0        | 0        | 0        | 0        | 0        | 0        |
| 0        | 0        | 0        | 0        | 0        | 0        | 0        | 0        | 0        | 0        | 0        | 0        | 0        | 0        | 0        |

| HC140    | HC098    | HC066    | HC031    | HC126    | HC067    | HC124    | HC015    | HC141    | HC055    | HC106    | HC045    | HC009    | HC017    | HC053    |
|----------|----------|----------|----------|----------|----------|----------|----------|----------|----------|----------|----------|----------|----------|----------|
| 0.382025 | 0.373538 | 0.371344 | 0.370979 | 0.370583 | 0.368089 | 0.364429 | 0.362769 | 0.362609 | 0.356974 | 0.355792 | 0.351635 | 0.350372 | 0.348358 | 0.345748 |
| 0.164236 | 0.152082 | 0.253615 | 0.169527 | 0.146742 | 0.242975 | 0.438864 | 0.181392 | 0.073554 | 0.285607 | 0.321645 | 0.207002 | 0.14991  | 0.200941 | 0.298254 |
| 0.070921 | 0.049893 | 0.138487 | 0.322264 | 0.307429 | 0.014648 | 0.001666 | 0.279144 | 0.422258 | 0.195918 | 0.146287 | 0.270316 | 0.347952 | 0.173011 | 0.038256 |
| 0.148015 | 0.009749 | 0.072044 | 0.031141 | 0.106895 | 0.099098 | 0.173988 | 0.059193 | 0.082336 | 0.027685 | 0.107714 | 0.083933 | 0.041689 | 0.0423   | 0.226518 |
| 0.212537 | 0.389504 | 0.15135  | 0.081241 | 0.038951 | 0.246805 | 0.004212 | 0.099941 | 0.038819 | 0.117541 | 0.032502 | 0.070666 | 0.101666 | 0.204828 | 0.061053 |
| 0.012816 | 0.016847 | 0.005562 | 0.007233 | 0.02165  | 0.005097 | 0.015875 | 0.009062 | 0.019799 | 0.010415 | 0.027733 | 0.008963 | 9.55E-04 | 0.009454 | 0.009091 |
| 0.007977 | 0.004996 | 0.006828 | 0.014924 | 5.53E-04 | 0.02324  | 9.45E-04 | 0.008141 | 3.39E-04 | 0.004762 | 0.003955 | 0.006423 | 0.005524 | 0.004702 | 0.020803 |
| 0.001028 | 0.003287 | 3.37E-04 | 0.002425 | 0.007197 | 4.80E-05 | 2.10E-05 | 2.48E-04 | 2.86E-04 | 9.68E-04 | 0.004305 | 9.78E-04 | 0.001673 | 0.016122 | 2.53E-04 |
| 0        | 0        | 0        | 0        | 0        | 0        | 0        | 0        | 0        | 0        | 0        | 0        | 0        | 0        | 0        |
| 0        | 0        | 2.90E-05 | 0        | 0        | 0        | 0        | 0        | 0        | 4.70E-05 | 0        | 0        | 0        | 2.84E-04 | 0        |
| 0        | 6.80E-05 | 4.04E-04 | 1.83E-04 | 0        | 0        | 0        | 1.10E-04 | 0        | 8.30E-05 | 0        | 8.40E-05 | 1.70E-04 | 0        | 2.40E-05 |
| 4.12E-04 | 3.60E-05 | 0        | 8.30E-05 | 0        | 0        | 0        | 0        | 0        | 0        | 6.70E-05 | 0        | 0        | 0        | 0        |
| 3.30E-05 | 0        | 0        | 0        | 0        | 0        | 0        | 0        | 0        | 0        | 0        | 0        | 0        | 0        | 0        |
| 0        | 0        | 0        | 0        | 0        | 0        | 0        | 0        | 0        | 0        | 0        | 0        | 8.90E-05 | 0        | 0        |
| 0        | 0        | 0        | 0        | 0        | 0        | 0        | 0        | 0        | 0        | 0        | 0        | 0        | 0        | 0        |
| 0        | 0        | 0        | 0        | 0        | 0        | 0        | 0        | 0        | 0        | 0        | 0        | 0        | 0        | 0        |
| 0        | 0        | 0        | 0        | 0        | 0        | 0        | 0        | 0        | 0        | 0        | 0        | 0        | 0        | 0        |
| 0        | 0        | 0        | 0        | 0        | 0        | 0        | 0        | 0        | 0        | 0        | 0        | 0        | 0        | 0        |
| 0        | 0        | 0        | 0        | 0        | 0        | 0        | 0        | 0        | 0        | 0        | 0        | 0        | 0        | 0        |

| HC139    | HC136    | HC111    | HC144    | HC123    | HC073    | HC097    | HC142    | HC094    | HC117    | HC023    | HC008    | HC107    | HC062    | HC016    |
|----------|----------|----------|----------|----------|----------|----------|----------|----------|----------|----------|----------|----------|----------|----------|
| 0.338657 | 0.336271 | 0.335863 | 0.331848 | 0.330745 | 0.330716 | 0.325276 | 0.316024 | 0.311243 | 0.30847  | 0.307021 | 0.30424  | 0.303002 | 0.30222  | 0.299552 |
| 0.13633  | 0.124799 | 0.232077 | 0.226656 | 0.339893 | 0.273439 | 0.336846 | 0.165166 | 0.326793 | 0.224408 | 0.255747 | 0.386843 | 0.347174 | 0.121004 | 0.195028 |
| 0.262609 | 0.2894   | 0.172058 | 0.047742 | 0.211665 | 0.107213 | 0.236542 | 0.314518 | 0.042032 | 0.038275 | 0.334726 | 0.173733 | 0.00316  | 0.354948 | 0.409247 |
| 0.012932 | 0.015268 | 0.065734 | 0.310477 | 0.035747 | 0.14234  | 0.061298 | 0.024383 | 0.264454 | 0.064392 | 0.036027 | 0.089422 | 0.278158 | 0.146923 | 0.034744 |
| 0.230421 | 0.219575 | 0.147352 | 0.060244 | 0.066018 | 0.119412 | 0.018286 | 0.127848 | 0.014216 | 0.33912  | 0.047112 | 0.040571 | 0.054003 | 0.048049 | 0.039385 |
| 0.009584 | 0.006559 | 0.011582 | 0.011688 | 0.015891 | 0.004791 | 0.018328 | 0.009547 | 0.003181 | 0.004931 | 0.016508 | 0.002908 | 0.010872 | 0.02444  | 0.019641 |
| 0.006319 | 0.007224 | 0.019806 | 0.010871 | 1.70E-05 | 0.018177 | 0.003146 | 0.038777 | 0.036655 | 0.015918 | 0.001054 | 0.001733 | 0.003136 | 0.001048 | 0.002052 |
| 0.003013 | 9.04E-04 | 0.015034 | 3.94E-04 | 0        | 0.00354  | 1.87E-04 | 0.003344 | 0.001069 | 0.003924 | 0.001767 | 9.20E-05 | 3.90E-05 | 0.001311 | 2.34E-04 |
| 0        | 0        | 0        | 0        | 0        | 0        | 0        | 0        | 1.40E-04 | 0        | 0        | 0        | 0        | 0        | 0        |
| 1.07E-04 | 0        | 0        | 0        | 0        | 0        | 2.30E-05 | 3.50E-05 | 4.40E-05 | 0        | 0        | 2.52E-04 | 4.80E-05 | 3.50E-05 | 0        |
| 2.80E-05 | 0        | 4.51E-04 | 1.70E-05 | 2.40E-05 | 3.72E-04 | 1.90E-05 | 3.24E-04 | 1.11E-04 | 5.62E-04 | 3.80E-05 | 0        | 9.10E-05 | 2.20E-05 | 3.40E-05 |
| 0        | 0        | 4.30E-05 | 6.30E-05 | 0        | 0        | 0        | 3.40E-05 | 4.00E-05 | 0        | 0        | 0        | 0        | 0        | 0        |
| 0        | 0        | 0        | 0        | 0        | 0        | 4.90E-05 | 0        | 2.20E-05 | 0        | 0        | 1.32E-04 | 3.17E-04 | 0        | 8.30E-05 |
| 0        | 0        | 0        | 0        | 0        | 0        | 0        | 0        | 0        | 0        | 0        | 3.70E-05 | 0        | 0        | 0        |
| 0        | 0        | 0        | 0        | 0        | 0        | 0        | 0        | 0        | 0        | 0        | 3.70E-05 | 0        | 0        | 0        |
| 0        | 0        | 0        | 0        | 0        | 0        | 0        | 0        | 0        | 0        | 0        | 0        | 0        | 0        | 0        |
| 0        | 0        | 0        | 0        | 0        | 0        | 0        | 0        | 0        | 0        | 0        | 0        | 0        | 0        | 0        |
| 0        | 0        | 0        | 0        | 0        | 0        | 0        | 0        | 0        | 0        | 0        | 0        | 0        | 0        | 0        |
| 0        | 0        | 0        | 0        | 0        | 0        | 0        | 0        | 0        | 0        | 0        | 0        | 0        | 0        | 0        |

| HC150    | HC012    | HC048    | HC105    | HC004    | HC116    | HC071    | HC044    | HC035    | HC025    | HC102    | HC010    | HC032    | HC112    | HC007    |
|----------|----------|----------|----------|----------|----------|----------|----------|----------|----------|----------|----------|----------|----------|----------|
| 0.299542 | 0.299366 | 0.294736 | 0.291576 | 0.290708 | 0.289222 | 0.286241 | 0.283015 | 0.277754 | 0.273615 | 0.27236  | 0.272059 | 0.272002 | 0.270926 | 0.266561 |
| 0.143751 | 0.15367  | 0.543505 | 0.361013 | 0.402488 | 0.106181 | 0.162563 | 0.213954 | 0.261814 | 0.519427 | 0.321785 | 0.229394 | 0.286801 | 0.118759 | 0.135704 |
| 0.343992 | 0.320679 | 0.003554 | 0.084454 | 0.053793 | 0.515447 | 0.401942 | 0.124807 | 0.096302 | 0.038263 | 0.249335 | 0.293078 | 0.216586 | 0.407177 | 0.464847 |
| 0.041705 | 0.098761 | 0.127925 | 0.187666 | 0.173241 | 0.036553 | 0.071751 | 0.234601 | 0.2204   | 0.128618 | 0.094196 | 0.09412  | 0.099774 | 0.043521 | 0.042689 |
| 0.142284 | 0.103468 | 0.003471 | 0.048706 | 0.052592 | 0.039537 | 0.055984 | 0.120965 | 0.105582 | 0.025552 | 0.020593 | 0.090245 | 0.111107 | 0.148946 | 0.070422 |
| 0.021838 | 0.008869 | 0.011194 | 0.021526 | 0.022054 | 0.008777 | 0.014196 | 0.002169 | 0.011217 | 0.014216 | 0.033304 | 0.006626 | 0.004816 | 0.008254 | 0.005562 |
| 0.001761 | 0.007112 | 0.015615 | 0.004704 | 0.002262 | 0.002379 | 0.004982 | 0.020416 | 0.023462 | 2.85E-04 | 0.006889 | 0.009879 | 0.008157 | 9.43E-04 | 0.004905 |
| 0.004989 | 0.007963 | 0        | 2.91E-04 | 0.002862 | 0.001847 | 0.00198  | 7.30E-05 | 0.003469 | 2.40E-05 | 0.001469 | 0.004562 | 6.99E-04 | 0.001474 | 0.008913 |
| 6.40E-05 | 0        | 0        | 0        | 0        | 0        | 0        | 0        | 0        | 0        | 0        | 1.80E-05 | 0        | 0        | 0        |
| 2.30E-05 | 0        | 0        | 0        | 0        | 3.40E-05 | 0        | 0        | 0        | 0        | 0        | 0        | 0        | 0        | 0        |
| 2.50E-05 | 8.60E-05 | 0        | 0        | 0        | 0        | 2.77E-04 | 0        | 0        | 0        | 0        | 0        | 3.10E-05 | 0        | 3.48E-04 |
| 2.60E-05 | 2.60E-05 | 0        | 0        | 0        | 2.30E-05 | 5.60E-05 | 0        | 0        | 0        | 6.90E-05 | 1.90E-05 | 2.70E-05 | 0        | 4.90E-05 |
| 0        | 0        | 0        | 0        | 0        | 0        | 2.80E-05 | 0        | 0        | 0        | 0        | 0        | 0        | 0        | 0        |
| 0        | 0        | 0        | 6.40E-05 | 0        | 0        | 0        | 0        | 0        | 0        | 0        | 0        | 0        | 0        | 0        |
| 0        | 0        | 0        | 0        | 0        | 0        | 0        | 0        | 0        | 0        | 0        | 0        | 0        | 0        | 0        |
| 0        | 0        | 0        | 0        | 0        | 0        | 0        | 0        | 0        | 0        | 0        | 0        | 0        | 0        | 0        |
| 0        | 0        | 0        | 0        | 0        | 0        | 0        | 0        | 0        | 0        | 0        | 0        | 0        | 0        | 0        |
| 0        | 0        | 0        | 0        | 0        | 0        | 0        | 0        | 0        | 0        | 0        | 0        | 0        | 0        | 0        |
| 0        | 0        | 0        | 0        | 0        | 0        | 0        | 0        | 0        | 0        | 0        | 0        | 0        | 0        | 0        |
| 0        | 0        | 0        | 0        | 0        | 0        | 0        | 0        | 0        | 0        | 0        | 0        | 0        | 0        | 0        |

| HC134    | HC049    | HC002    | HC087    | HC081    | HC065    | HC075    | HC096    | HC085    | HC145    | HC070    | HC088    | HC019    | HC079    | HC034    |
|----------|----------|----------|----------|----------|----------|----------|----------|----------|----------|----------|----------|----------|----------|----------|
| 0.259245 | 0.25739  | 0.255011 | 0.254807 | 0.251999 | 0.250655 | 0.249985 | 0.236065 | 0.2345   | 0.233182 | 0.228294 | 0.224143 | 0.221414 | 0.221129 | 0.218901 |
| 0.284487 | 0.187323 | 0.46371  | 0.194432 | 0.382706 | 0.261805 | 0.281863 | 0.144231 | 0.447963 | 0.252084 | 0.203249 | 0.222292 | 0.262638 | 0.274504 | 0.208809 |
| 0.21603  | 0.35934  | 0.010136 | 0.202238 | 0.117507 | 0.245771 | 0.172755 | 0.48926  | 0.059351 | 0.027129 | 0.380887 | 0.301984 | 0.007149 | 0.338152 | 0.265516 |
| 0.189433 | 0.044612 | 0.238392 | 0.032091 | 0.085538 | 0.192913 | 0.147754 | 0.032921 | 0.211993 | 0.439232 | 0.108904 | 0.073596 | 0.390735 | 0.01949  | 0.272456 |
| 0.035538 | 0.107418 | 0.003816 | 0.29425  | 0.134969 | 0.023711 | 0.115973 | 0.076724 | 0.0299   | 0.025501 | 0.07203  | 0.144818 | 0.082295 | 0.112652 | 0.028405 |
| 0.005115 | 0.028259 | 0.019741 | 0.013434 | 0.009422 | 0.008635 | 0.00552  | 0.014554 | 0.009659 | 0.017709 | 0.004521 | 0.003638 | 0.001007 | 0.026951 | 0.002571 |
| 0.007711 | 0.007029 | 0.009067 | 0.002342 | 0.017859 | 0.016279 | 0.024448 | 0.001908 | 0.005788 | 0.004635 | 0.00155  | 0.012816 | 0.019894 | 0.001402 | 0.002656 |
| 0.002072 | 0.008629 | 1.27E-04 | 0.006355 | 0        | 1.50E-04 | 0.001545 | 0.004337 | 8.27E-04 | 5.28E-04 | 3.04E-04 | 0.01439  | 0.014743 | 0.00572  | 5.83E-04 |
| 0        | 0        | 0        | 0        | 0        | 0        | 0        | 0        | 0        | 0        | 2.70E-05 | 2.60E-05 | 0        | 0        | 0        |
| 9.60E-05 | 0        | 0        | 2.80E-05 | 0        | 0        | 0        | 0        | 0        | 0        | 5.00E-05 | 0.001045 | 3.80E-05 | 0        | 4.80E-05 |
| 1.57E-04 | 0        | 0        | 2.30E-05 | 0        | 5.60E-05 | 1.27E-04 | 0        | 1.90E-05 | 0        | 1.84E-04 | 4.27E-04 | 0        | 0        | 5.50E-05 |
| 3.60E-05 | 0        | 0        | 0        | 0        | 0        | 0        | 0        | 0        | 0        | 0        | 7.76E-04 | 0        | 0        | 0        |
| 5.20E-05 | 0        | 0        | 0        | 0        | 2.50E-05 | 0        | 0        | 0        | 0        | 0        | 4.90E-05 | 8.70E-05 | 0        | 0        |
| 0        | 0        | 0        | 0        | 0        | 0        | 3.00E-05 | 0        | 0        | 0        | 0        | 0        | 0        | 0        | 0        |
| 2.80E-05 | 0        | 0        | 0        | 0        | 0        | 0        | 0        | 0        | 0        | 0        | 0        | 0        | 0        | 0        |
| 0        | 0        | 0        | 0        | 0        | 0        | 0        | 0        | 0        | 0        | 0        | 0        | 0        | 0        | 0        |
| 0        | 0        | 0        | 0        | 0        | 0        | 0        | 0        | 0        | 0        | 0        | 0        | 0        | 0        | 0        |
| 0        | 0        | 0        | 0        | 0        | 0        | 0        | 0        | 0        | 0        | 0        | 0        | 0        | 0        | 0        |
| 0        | 0        | 0        | 0        | 0        | 0        | 0        | 0        | 0        | 0        | 0        | 0        | 0        | 0        | 0        |

| HC060    | HC018    | HC109    | HC038    | HC077    | HC029    | HC089    | HC130    | HC093    | HC042    | HC100    | HC014    | HC148    | HC133    | HC149    |
|----------|----------|----------|----------|----------|----------|----------|----------|----------|----------|----------|----------|----------|----------|----------|
| 0.218789 | 0.212504 | 0.212197 | 0.201527 | 0.199119 | 0.19146  | 0.189577 | 0.18883  | 0.186087 | 0.182444 | 0.175766 | 0.173316 | 0.17246  | 0.167196 | 0.166572 |
| 0.564991 | 0.200191 | 0.145861 | 0.224247 | 0.045956 | 0.366852 | 0.402278 | 0.110137 | 0.247579 | 0.12379  | 0.139223 | 0.48559  | 0.044672 | 0.146091 | 0.067787 |
| 0.038232 | 0.300296 | 0.598691 | 0.314856 | 0.695662 | 0.120402 | 0.20407  | 0.584482 | 0.136744 | 0.00359  | 0.423118 | 0.062793 | 0.639946 | 0.496915 | 0.705145 |
| 0.039236 | 0.113569 | 0.022271 | 0.091433 | 0.029714 | 0.064806 | 0.139041 | 0.077885 | 0.156478 | 0.646591 | 0.194936 | 0.219832 | 0.005892 | 0.05849  | 0.01719  |
| 0.065158 | 0.162363 | 0.005275 | 0.139364 | 0.015983 | 0.232618 | 0.037605 | 0.018535 | 0.259253 | 0.035281 | 0.043618 | 0.037362 | 0.124499 | 0.123582 | 0.022251 |
| 0.009259 | 0.005472 | 0.01406  | 0.026837 | 0.011304 | 0.013858 | 0.008824 | 0.016745 | 0.00306  | 0.006371 | 0.020226 | 0.003411 | 0.006152 | 0.005094 | 0.019419 |
| 0.063917 | 0.004909 | 0.001465 | 0.001678 | 0.001949 | 0.006575 | 0.009792 | 0.002528 | 0.01051  | 0.001898 | 0.002684 | 0.01697  | 0.006379 | 0.001081 | 4.25E-04 |
| 1.90E-04 | 4.47E-04 | 1.32E-04 | 2.30E-05 | 3.13E-04 | 0.003321 | 0.008151 | 8.13E-04 | 2.57E-04 | 3.50E-05 | 3.65E-04 | 2.40E-04 | 0        | 0.001472 | 0.001182 |
| 0        | 0        | 0        | 0        | 0        | 0        | 0        | 0        | 0        | 0        | 0        | 3.70E-05 | 0        | 3.00E-05 | 0        |
| 2.90E-05 | 1.57E-04 | 0        | 0        | 0        | 0        | 2.90E-05 | 0        | 0        | 0        | 0        | 1.17E-04 | 0        | 0        | 0        |
| 1.31E-04 | 9.20E-05 | 0        | 0        | 0        | 5.20E-05 | 2.12E-04 | 4.50E-05 | 0        | 0        | 3.30E-05 | 4.50E-05 | 0        | 4.90E-05 | 2.90E-05 |
| 0        | 0        | 0        | 0        | 0        | 5.60E-05 | 3.65E-04 | 0        | 0        | 0        | 3.10E-05 | 4.00E-05 | 0        | 0        | 0        |
| 6.80E-05 | 0        | 4.80E-05 | 0        | 0        | 0        | 0        | 0        | 3.20E-05 | 0        | 0        | 1.14E-04 | 0        | 0        | 0        |
| 0        | 0        | 0        | 0        | 0        | 0        | 0        | 0        | 0        | 0        | 0        | 0        | 0        | 0        | 0        |
| 0        | 0        | 0        | 0        | 0        | 0        | 2.80E-05 | 0        | 0        | 0        | 0        | 1.33E-04 | 0        | 0        | 0        |
| 0        | 0        | 0        | 0        | 0        | 0        | 2.80E-05 | 0        | 0        | 0        | 0        | 0        | 0        | 0        | 0        |
| 0        | 0        | 0        | 0        | 0        | 0        | 0        | 0        | 0        | 0        | 0        | 0        | 0        | 0        | 0        |
| 0        | 0        | 0        | 2.40E-05 | 0        | 0        | 0        | 0        | 0        | 0        | 0        | 0        | 0        | 0        | 0        |
| 0        | 0        | 0        | 1.10E-05 | 0        | 0        | 0        | 0        | 0        | 0        | 0        | 0        | 0        | 0        | 0        |

| HC054    | HC022    | HC129    | HC076    | HC104    | HC026    | HC131    | HC095    | HC059    | HC068    | HC101    | HC113    | HC006    | HC143    | HC127    |
|----------|----------|----------|----------|----------|----------|----------|----------|----------|----------|----------|----------|----------|----------|----------|
| 0.161667 | 0.161012 | 0.159163 | 0.158959 | 0.153994 | 0.153801 | 0.153762 | 0.151323 | 0.150559 | 0.148853 | 0.132641 | 0.124692 | 0.12336  | 0.122621 | 0.113481 |
| 0.084928 | 0.220868 | 0.255486 | 0.045633 | 0.429294 | 0.149739 | 0.435747 | 0.449249 | 0.161289 | 0.118087 | 0.164711 | 0.309877 | 0.331147 | 0.325334 | 0.430718 |
| 0.359374 | 0.373356 | 0.341365 | 0.71349  | 0.222949 | 0.576293 | 0.033417 | 0.036169 | 0.502025 | 0.470933 | 0.434304 | 0.250253 | 0.208488 | 0.348877 | 0.144358 |
| 0.026677 | 0.189489 | 0.144255 | 0.007    | 0.095367 | 0.011359 | 0.32395  | 0.190446 | 0.116699 | 0.016157 | 0.077324 | 0.116627 | 0.278475 | 0.13532  | 0.260927 |
| 0.334228 | 0.031124 | 0.034847 | 0.062999 | 0.058749 | 0.092496 | 0.033467 | 0.141476 | 0.064874 | 0.230409 | 0.164151 | 0.189004 | 0.01853  | 0.049624 | 0.009068 |
| 0.005712 | 0.02366  | 0.051805 | 0.008277 | 0.038469 | 0.014051 | 0.017231 | 0.010534 | 0.001421 | 0.005882 | 0.021001 | 0.005247 | 0.032447 | 0.002822 | 0.035536 |
| 0.007168 | 4.91E-04 | 0.012711 | 0.002403 | 0.001067 | 0.001678 | 0.002345 | 0.017744 | 0.003034 | 0.008701 | 0.004055 | 0.003028 | 0.007553 | 0.012607 | 0.005912 |
| 0.019516 | 0        | 2.49E-04 | 0.001189 | 1.11E-04 | 5.83E-04 | 8.10E-05 | 0.002983 | 9.90E-05 | 9.13E-04 | 0.001712 | 0.001241 | 0        | 0.00262  | 0        |
| 0        | 0        | 0        | 0        | 0        | 0        | 0        | 0        | 0        | 0        | 0        | 0        | 0        | 0        | 0        |
| 5.80E-05 | 0        | 0        | 1.90E-05 | 0        | 0        | 0        | 2.00E-05 | 0        | 3.30E-05 | 0        | 0        | 0        | 0        | 0        |
| 6.72E-04 | 0        | 1.19E-04 | 3.10E-05 | 0        | 0        | 0        | 1.90E-05 | 0        | 3.20E-05 | 1.01E-04 | 0        | 0        | 1.75E-04 | 0        |
| 0        | 0        | 0        | 0        | 0        | 0        | 0        | 0        | 0        | 0        | 0        | 0        | 0        | 0        | 0        |
| 0        | 0        | 0        | 0        | 0        | 0        | 0        | 3.70E-05 | 0        | 0        | 0        | 0        | 0        | 0        | 0        |
| 0        | 0        | 0        | 0        | 0        | 0        | 0        | 0        | 0        | 0        | 0        | 3.10E-05 | 0        | 0        | 0        |
| 0        | 0        | 0        | 0        | 0        | 0        | 0        | 0        | 0        | 0        | 0        | 0        | 0        | 0        | 0        |
| 0        | 0        | 0        | 0        | 0        | 0        | 0        | 0        | 0        | 0        | 0        | 0        | 0        | 0        | 0        |
| 0        | 0        | 0        | 0        | 0        | 0        | 0        | 0        | 0        | 0        | 0        | 0        | 0        | 0        | 0        |
| 0        | 0        | 0        | 0        | 0        | 0        | 0        | 0        | 0        | 0        | 0        | 0        | 0        | 0        | 0        |
| 0        | 0        | 0        | 0        | 0        | 0        | 0        | 0        | 0        | 0        | 0        | 0        | 0        | 0        | 0        |

| HC063    | HC021    | HC027    | HC084    | HC125    | HC037    | HC082    | HC135    | HC108    | HC024    | HC028    | HC103    | HC058    | HC078    | HC110    |
|----------|----------|----------|----------|----------|----------|----------|----------|----------|----------|----------|----------|----------|----------|----------|
| 0.113328 | 0.112856 | 0.108969 | 0.10025  | 0.089271 | 0.076713 | 0.07484  | 0.051207 | 0.050104 | 0.049186 | 0.046594 | 0.037966 | 0.036551 | 0.025923 | 0.01344  |
| 0.354442 | 0.622155 | 0.616358 | 0.341012 | 0.165259 | 0.164693 | 0.09436  | 0.333913 | 0.419066 | 0.245986 | 0.146021 | 0.072384 | 0.225132 | 0.435346 | 0.44642  |
| 0.092824 | 0.06589  | 0.160989 | 0.078337 | 0.656523 | 0.453501 | 0.697156 | 0.36047  | 0.259099 | 0.153483 | 0.596054 | 0.649563 | 0.581396 | 0.085791 | 0.078184 |
| 0.368815 | 0.104557 | 0.074872 | 0.452397 | 0.013296 | 0.266382 | 0.077722 | 0.163342 | 0.100115 | 0.504842 | 0.069134 | 0.206965 | 0.128956 | 0.413268 | 0.433961 |
| 0.034094 | 0.055484 | 0.005182 | 0.007016 | 0.065056 | 0.03348  | 0.04896  | 0.077459 | 0.157722 | 0.019162 | 0.122592 | 1.60E-04 | 0.022156 | 0.016746 | 0.007463 |
| 0.026937 | 0.014709 | 0.028032 | 0.016005 | 0.0065   | 0.004217 | 1.08E-04 | 0.004851 | 0.001808 | 0.025198 | 0.017774 | 0.030891 | 0.001849 | 0.019559 | 0.02045  |
| 0.008631 | 0.018382 | 0.005556 | 0.004838 | 0.003545 | 7.26E-04 | 0.00175  | 0.00743  | 0.007745 | 0.001349 | 0.001172 | 0.002071 | 0.002959 | 0.003246 | 8.20E-05 |
| 6.59E-04 | 0.005785 | 4.20E-05 | 1.21E-04 | 2.28E-04 | 2.53E-04 | 0.004962 | 1.97E-04 | 0.003979 | 6.89E-04 | 2.92E-04 | 0        | 9.88E-04 | 1.21E-04 | 0        |
| 0        | 0        | 0        | 0        | 0        | 0        | 5.80E-05 | 2.50E-04 | 0        | 0        | 3.67E-04 | 0        | 0        | 0        | 0        |
| 9.70E-05 | 0        | 0        | 0        | 0        | 3.50E-05 | 0        | 5.18E-04 | 0        | 0        | 0        | 0        | 0        | 0        | 0        |
| 1.73E-04 | 0        | 0        | 0        | 1.89E-04 | 0        | 8.40E-05 | 7.30E-05 | 8.70E-05 | 7.50E-05 | 0        | 0        | 0        | 0        | 0        |
| 0        | 1.82E-04 | 0        | 2.40E-05 | 0        | 0        | 0        | 1.09E-04 | 1.87E-04 | 3.00E-05 | 0        | 0        | 0        | 0        | 0        |
| 0        | 0        | 0        | 0        | 1.33E-04 | 0        | 0        | 1.53E-04 | 6.70E-05 | 0        | 0        | 0        | 0        | 0        | 0        |
| 0        | 0        | 0        | 0        | 0        | 0        | 0        | 0        | 2.10E-05 | 0        | 0        | 0        | 0        | 0        | 0        |
| 0        | 0        | 0        | 0        | 0        | 0        | 0        | 2.80E-05 | 0        | 0        | 0        | 0        | 1.30E-05 | 0        | 0        |
| 0        | 0        | 0        | 0        | 0        | 0        | 0        | 0        | 0        | 0        | 0        | 0        | 0        | 0        | 0        |
| 0        | 0        | 0        | 0        | 0        | 0        | 0        | 0        | 0        | 0        | 0        | 0        | 0        | 0        | 0        |
| 0        | 0        | 0        | 0        | 0        | 0        | 0        | 0        | 0        | 0        | 0        | 0        | 0        | 0        | 0        |
| 0        | 0        | 0        | 0        | 0        | 0        | 0        | 0        | 0        | 0        | 0        | 0        | 0        | 0        | 0        |

| SP22     | SP28     | SP29     | SP27     | SP04     | SP05     | SP07     | SP17     | SP03     | SP18     | SP11     | SP25     | SP37     | SP20     | SP06     |
|----------|----------|----------|----------|----------|----------|----------|----------|----------|----------|----------|----------|----------|----------|----------|
| 0.651497 | 0.651423 | 0.592365 | 0.524193 | 0.519192 | 0.496089 | 0.463602 | 0.461752 | 0.403361 | 0.390302 | 0.380814 | 0.300049 | 0.286339 | 0.280577 | 0.266773 |
| 0.076917 | 0.259946 | 0.168668 | 0.328461 | 0.164303 | 0.073366 | 0.042852 | 0.141422 | 0.193367 | 0.187671 | 0.234132 | 0.048073 | 0.338186 | 0.164616 | 0.053462 |
| 0.110399 | 0.022967 | 0.02034  | 0.128993 | 0.135772 | 0.307811 | 0.328871 | 0.018451 | 0.028134 | 0.049656 | 0.0469   | 0.025013 | 0.001208 | 0.437751 | 0.641026 |
| 0.054534 | 0.04438  | 0.032274 | 0.008327 | 0.139708 | 0.010051 | 0.019454 | 0.0984   | 0.318532 | 0.051858 | 0.099897 | 0.038571 | 0.351873 | 0.006124 | 0.013806 |
| 0.089718 | 0.006965 | 0.17875  | 0.002719 | 0.011612 | 0.092094 | 0.130292 | 0.235168 | 0.03039  | 0.303121 | 0.229236 | 0.578639 | 0.012684 | 0.097103 | 0.003748 |
| 0.014371 | 0.012945 | 0.001828 | 0.006766 | 0.028999 | 0.020228 | 0.014929 | 0.011607 | 0.024245 | 0.004573 | 0.0081   | 0.00465  | 0.008758 | 0.012316 | 0.020622 |
| 0.002564 | 0.001374 | 0.005775 | 4.73E-04 | 4.14E-04 | 2.64E-04 | 0        | 0.032249 | 0.001971 | 0.0127   | 8.75E-04 | 0.004591 | 5.64E-04 | 8.03E-04 | 5.63E-04 |
| 0        | 0        | 0        | 0        | 0        | 0        | 0        | 7.86E-04 | 0        | 5.80E-05 | 0        | 1.86E-04 | 0        | 3.18E-04 | 0        |
| 0        | 0        | 0        | 0        | 0        | 0        | 0        | 8.60E-05 | 0        | 0        | 0        | 0        | 0        | 0        | 0        |
| 0        | 0        | 0        | 6.80E-05 | 0        | 9.70E-05 | 0        | 7.90E-05 | 0        | 6.10E-05 | 4.60E-05 | 1.44E-04 | 1.37E-04 | 3.92E-04 | 0        |
| 0        | 0        | 0        | 0        | 0        | 0        | 0        | 0        | 0        | 0        | 0        | 0        | 2.51E-04 | 0        | 0        |
| 0        | 0        | 0        | 0        | 0        | 0        | 0        | 0        | 0        | 0        | 0        | 0        | 0        | 0        | 0        |
| 0        | 0        | 0        | 0        | 0        | 0        | 0        | 0        | 0        | 0        | 0        | 8.40E-05 | 0        | 0        | 0        |
| 0        | 0        | 0        | 0        | 0        | 0        | 0        | 0        | 0        | 0        | 0        | 0        | 0        | 0        | 0        |
| 0        | 0        | 0        | 0        | 0        | 0        | 0        | 0        | 0        | 0        | 0        | 0        | 0        | 0        | 0        |
| 0        | 0        | 0        | 0        | 0        | 0        | 0        | 0        | 0        | 0        | 0        | 0        | 0        | 0        | 0        |
| 0        | 0        | 0        | 0        | 0        | 0        | 0        | 0        | 0        | 0        | 0        | 0        | 0        | 0        | 0        |
| 0        | 0        | 0        | 0        | 0        | 0        | 0        | 0        | 0        | 0        | 0        | 0        | 0        | 0        | 0        |
| 0        | 0        | 0        | 0        | 0        | 0        | 0        | 0        | 0        | 0        | 0        | 0        | 0        | 0        | 0        |
| 0        | 0        | 0        | 0        | 0        | 0        | 0        | 0        | 0        | 0        | 0        | 0        | 0        | 0        | 0        |

| SP26     | SP15     | SP13     | SP23     | SP24     | SP34     | SP35     | SP09     | SP10     | SP32     | SP08     | SP19     | SP30     | SP02     | SP14     |
|----------|----------|----------|----------|----------|----------|----------|----------|----------|----------|----------|----------|----------|----------|----------|
| 0.261498 | 0.235879 | 0.218435 | 0.211785 | 0.188931 | 0.185141 | 0.17451  | 0.173757 | 0.171796 | 0.117303 | 0.116924 | 0.090819 | 0.078808 | 0.067351 | 0.065147 |
| 0.305288 | 0.381099 | 0.150311 | 0.658558 | 0.146239 | 0.413987 | 0.418283 | 0.114375 | 0.559372 | 0.245431 | 0.176292 | 0.017295 | 0.204884 | 0.007263 | 0.089263 |
| 0.258322 | 0.128166 | 0.575991 | 0.050022 | 0.466161 | 0.042018 | 0.136793 | 0.609142 | 0.002652 | 0.480551 | 0.52473  | 0.014389 | 0.448201 | 0.852026 | 0.665597 |
| 0.017721 | 0.027067 | 0.011464 | 0.017661 | 0.045991 | 0.115929 | 0.120255 | 0.017291 | 0.155396 | 0.053921 | 0.048122 | 0.011301 | 0.071108 | 3.19E-04 | 0.037896 |
| 0.14563  | 0.208932 | 0.018378 | 0.046257 | 0.126709 | 0.198441 | 0.147579 | 0.074355 | 0.071713 | 0.095602 | 0.131706 | 0.857329 | 0.192325 | 0.068558 | 0.123864 |
| 0.009196 | 0.017015 | 0.024584 | 0.015439 | 0.009508 | 0.002122 | 0.001642 | 0.010868 | 0.019073 | 0.004636 | 0.001584 | 0.006601 | 1.20E-05 | 0.004403 | 0.017812 |
| 0.002205 | 0.001578 | 8.37E-04 | 2.78E-04 | 0.011909 | 0.036348 | 8.87E-04 | 2.12E-04 | 0.019998 | 0.001328 | 1.05E-04 | 0.001205 | 0.002224 | 0        | 4.21E-04 |
| 0        | 1.68E-04 | 0        | 0        | 0.003913 | 0.005098 | 1.70E-05 | 0        | 0        | 1.70E-04 | 0        | 2.10E-04 | 7.43E-04 | 4.00E-05 | 0        |
| 0        | 0        | 0        | 0        | 0        | 7.30E-05 | 2.00E-05 | 0        | 0        | 0        | 0        | 0        | 2.82E-04 | 0        | 0        |
| 1.40E-04 | 9.60E-05 | 0        | 0        | 5.26E-04 | 1.95E-04 | 0        | 0        | 0        | 3.68E-04 | 2.03E-04 | 7.11E-04 | 8.98E-04 | 4.00E-05 | 0        |
| 0        | 0        | 0        | 0        | 8.00E-05 | 6.32E-04 | 1.40E-05 | 0        | 0        | 5.93E-04 | 3.34E-04 | 6.80E-05 | 2.22E-04 | 0        | 0        |
| 0        | 0        | 0        | 0        | 0        | 1.60E-05 | 0        | 0        | 0        | 9.70E-05 | 0        | 7.20E-05 | 4.80E-05 | 0        | 0        |
| 0        | 0        | 0        | 0        | 0        | 0        | 0        | 0        | 0        | 0        | 0        | 0        | 2.45E-04 | 0        | 0        |
| 0        | 0        | 0        | 0        | 3.30E-05 | 0        | 0        | 0        | 0        | 0        | 0        | 0        | 0        | 0        | 0        |
| 0        | 0        | 0        | 0        | 0        | 0        | 0        | 0        | 0        | 0        | 0        | 0        | 0        | 0        | 0        |
| 0        | 0        | 0        | 0        | 0        | 0        | 0        | 0        | 0        | 0        | 0        | 0        | 0        | 0        | 0        |
| 0        | 0        | 0        | 0        | 0        | 0        | 0        | 0        | 0        | 0        | 0        | 0        | 0        | 0        | 0        |
| 0        | 0        | 0        | 0        | 0        | 0        | 0        | 0        | 0        | 0        | 0        | 0        | 0        | 0        | 0        |
| 0        | 0        | 0        | 0        | 0        | 0        | 0        | 0        | 0        | 0        | 0        | 0        | 0        | 0        | 0        |
| 0        | 0        | 0        | 0        | 0        | 0        | 0        | 0        | 0        | 0        | 0        | 0        | 0        | 0        | 0        |

| SP33     | SP31     | SP12     | SP36     | SP21     | SP01     | SP16     |
|----------|----------|----------|----------|----------|----------|----------|
| 0.055751 | 0.04559  | 0.045435 | 0.044406 | 0.011731 | 0.004232 | 0.001096 |
| 0.232936 | 0.765295 | 0.044245 | 0.168481 | 0.797806 | 0.494648 | 0.866678 |
| 0.561697 | 0.055875 | 0.887754 | 0.651484 | 0.030962 | 0.492946 | 0.001353 |
| 0.130283 | 0.063053 | 0.006519 | 0.030673 | 0.114631 | 0.006374 | 0.125352 |
| 0.017945 | 0.06621  | 0.001747 | 0.09889  | 0.001366 | 4.53E-04 | 4.25E-04 |
| 0        | 0.003935 | 0.014206 | 0.005324 | 0.043504 | 1.60E-05 | 0.00506  |
| 1.37E-04 | 4.20E-05 | 9.40E-05 | 4.27E-04 | 0        | 0        | 3.60E-05 |
| 0        | 0        | 0        | 4.30E-05 | 0        | 0        | 0        |
| 9.30E-05 | 0        | 0        | 0        | 0        | 1.81E-04 | 0        |
| 0        | 0        | 0        | 1.61E-04 | 0        | 0        | 0        |
| 0        | 0        | 0        | 0        | 0        | 0.00115  | 0        |
| 0        | 0        | 0        | 1.11E-04 | 0        | 0        | 0        |
| 0        | 0        | 0        | 0        | 0        | 0        | 0        |
| 0.001158 | 0        | 0        | 0        | 0        | 0        | 0        |
| 0        | 0        | 0        | 0        | 0        | 0        | 0        |
| 0        | 0        | 0        | 0        | 0        | 0        | 0        |
| 0        | 0        | 0        | 0        | 0        | 0        | 0        |
| 0        | 0        | 0        | 0        | 0        | 0        | 0        |
| 0        | 0        | 0        | 0        | 0        | 0        | 0        |
| 0        | 0        | 0        | 0        | 0        | 0        | 0        |

Table S14. The relative abundance and distribution of the key 84 OTUs among CP (n=72), SP (n=37), and HC (n=150) groups.

| CP01                                    | CP52     | CP51     | CP50     | CP49     | CP48     | CP47     | CP53     | CP46     | CP44     | CP43     |          |
|-----------------------------------------|----------|----------|----------|----------|----------|----------|----------|----------|----------|----------|----------|
| OTU1645 (Prevotella)                    | 0.000473 | 0.001277 | 0.008525 | 0.615978 | 0.005877 |          | 0        | 0.000101 | 0.007051 | 0.006649 | 0.003648 |
| OTU1513 (Candidate_division_TM7_norank) | 0        | 0        | 0        | 0        | 0        | 0        | 0        | 0        | 0        | 0        | 0        |
| OTU2876 (Candidate_division_TM7_norank) | 0        | 0        | 0        | 0        | 0        | 0        | 0        | 0        | 0        | 0        | 0        |
| OTU905 (Prevotella)                     | 0        | 0        | 0        | 0        | 0.000144 |          | 0        | 0        | 0.000138 | 0.000213 | 0        |
| OTU955 (Prevotella)                     | 0.000126 | 0        | 0        | 0        | 0.000231 |          | 0        | 0        | 0.000412 | 0.000444 | 0        |
| OTU1103 (Prevotella)                    | 0        | 0        | 0        | 0        | 0.000212 |          | 0        | 0        | 0.000415 | 0        | 0        |
| OTU2115 (Prevotella)                    | 0        | 0        | 1.06E-05 | 0        | 0.001125 |          | 0        | 0.000285 | 0.002133 | 0        | 0        |
| OTU1279 (Family_XIII_Incertae_Sedis)    | 0.00578  | 0.004307 | 0.002478 | 7.41E-05 | 0.038713 | 0.006247 | 0.006671 | 0.006868 | 0.0022   | 0.008622 |          |
| OTU2471 (Rothia)                        | 0.00118  | 0        | 0        | 0        | 0        | 0        | 0        | 5.26E-05 | 0        | 0.000931 |          |
| OTU1526 (Porphyromonas)                 | 0.000312 | 0        | 0        | 0        | 0        | 0        | 0        | 0.001082 | 0        | 0        |          |
| OTU2500 (Porphyromonas)                 | 0.000186 | 0.000134 | 0        | 0        | 0        | 0        | 0        | 0.000304 | 0        | 0        |          |
| OTU2733 (Bacteria_unclassified)         | 0        | 0        | 0        | 5.80E-05 | 0.000741 |          | 0        | 0.000802 | 0        | 0        |          |
| OTU1520 (Porphyromonas)                 | 0.001628 | 0.015675 | 0.051257 | 0        | 0.033721 |          | 0        | 0.000932 | 0.274749 | 0.000377 | 0.009529 |
| OTU2886 (Porphyromonas)                 | 0.000107 | 0        | 0.003874 | 0        | 0.004059 | 0.00023  | 0        | 0.013148 | 0        | 0.001786 |          |
| OTU196 (Fusobacterium)                  | 0        | 0.00016  | 0.000598 | 0        | 0        | 0.000235 | 0.001961 | 0.002279 | 0.000207 | 0.003253 |          |
| OTU1801 (Fusobacterium)                 | 0.000199 | 0.096984 | 0.103489 | 9.61E-05 | 0.001289 | 0.013615 | 0.338703 | 0.229851 | 0.020785 | 0.490768 |          |
| OTU274 (Fusobacterium)                  | 0        | 0.005948 | 0.000122 | 0        | 0.000548 | 0        | 0.000573 | 0.004296 | 0        | 0        |          |
| OTU2627 (Fusobacterium)                 | 0        | 0.003994 | 7.10E-05 | 0        | 0        | 0        | 0.000224 | 0.001425 | 0.000401 | 0.000941 |          |
| OTU1957 (Peptostreptococcus)            | 0.010966 | 0.009518 | 0.004575 | 7.81E-05 | 0.022179 | 0.004198 | 0.002246 | 0.013048 | 0.001307 | 0.025011 |          |
| OTU641 (Filifactor)                     | 0.000107 | 0        | 0        | 0        | 0        | 0        | 0        | 0.004075 | 0        | 0        |          |
| OTU2273 (Parvimonas)                    | 0        | 0.00121  | 9.06E-06 | 0        | 0.00025  | 0        | 0.000132 | 0.010072 | 0        | 0        |          |
| OTU2298 (Candidate_division_SR1_norank) | 0        | 0        | 0        | 0        | 0        | 0        | 0        | 0.001701 | 0        | 0        |          |
| OTU110 (Neisseria)                      | 0.000609 | 0.000246 | 0.493122 | 6.41E-05 | 0.001423 | 0.486549 | 0.061507 | 0.149369 | 0.336899 | 0.005394 |          |
| OTU3124 (Streptococcus)                 | 0        | 0        | 0        | 0        | 0        | 0.001556 | 0.000447 | 0.000288 | 0.001264 | 0        |          |
| OTU1710 (Neisseria)                     | 0.000133 | 0        | 0        | 0        | 0        | 0.012094 | 0.013032 | 0.008653 | 0.003969 | 0.076441 |          |
| OTU1907 (Pasteurellaceae_unclassified)  | 9.46E-05 | 0        | 0        | 0        | 0        | 0.002554 | 0.000935 | 0.000949 | 0.011468 | 0        |          |
| OTU187 (Proteobacteria_unclassified)    | 0        | 0        | 0        | 0        | 0        | 0.001399 | 0.001134 | 0.002263 | 0.000948 | 0        |          |
| OTU1943 (Haemophilus)                   | 9.78E-05 | 0        | 3.62E-05 | 0        | 0        | 0.000489 | 0.000625 | 0.001649 | 0.005142 | 0        |          |
| OTU1800 (Aggregatibacter)               | 0        | 0        | 1.36E-05 | 0        | 0        | 0        | 0        | 0        | 0        | 0        |          |
| OTU2437 (Family_XIII_Incertae_Sedis)    | 0        | 0        | 0        | 0        | 0        | 0        | 0        | 0        | 0        | 0        |          |
| OTU1631 (Bacteria_unclassified)         | 0        | 0        | 0        | 0        | 0.000846 |          | 0        | 0.000158 | 0        | 0        |          |
| OTU2827 (Prevotella)                    | 0        | 0        | 0        | 0        | 0.000741 | 0        | 0.000135 | 4.15E-05 | 0        | 0        |          |
| OTU1570 (Bacteria_unclassified)         | 0        | 0        | 0        | 0        | 0.000423 | 0.000455 | 0        | 5.53E-05 | 0.000389 | 0        |          |
| OTU1876 (Haemophilus)                   | 0.000196 | 0.000878 | 0.012126 | 0        | 0.013821 | 0.00024  | 0.001361 | 0.00514  | 0.011116 | 0        |          |
| OTU2186 (Haemophilus)                   | 0.001275 | 0.003339 | 0.060062 | 6.01E-05 | 0.057218 | 0.001267 | 0.006723 | 0.024204 | 0.051173 | 0.000484 |          |
| OTU1616 (Haemophilus)                   | 0.000139 | 0        | 0        | 0        | 0        | 0        | 0        | 0        | 0.000638 | 0        |          |
| OTU771 (Haemophilus)                    | 0        | 0        | 0        | 0        | 0        | 0        | 0        | 0        | 0        | 0        |          |
| OTU678 (Rothia)                         | 0.000227 | 0        | 0        | 0        | 0        | 0        | 0        | 9.96E-05 | 0.000377 | 0        |          |
| OTU1463 (Rothia)                        | 0.000937 | 0        | 0        | 0        | 0.000164 | 0        | 0        | 0.000113 | 0.000371 | 0        |          |
| OTU1483 (Prevotella)                    | 0        | 0        | 0        | 0        | 0.001847 | 0        | 0        | 9.41E-05 | 0.000201 | 0        |          |
| OTU1351 (Prevotella)                    | 0        | 0        | 0        | 0        | 0.014158 | 0        | 0.007989 | 0.002227 | 0        | 0.000505 |          |
| OTU1495 (Prevotella)                    | 0        | 0        | 0        | 0        | 0.001741 | 0        | 0.00604  | 0.00125  | 0        | 0        |          |
| OTU283 (Bacteria_unclassified)          | 0        | 0        | 0        | 0        | 0        | 0        | 0        | 0        | 0        | 0        |          |
| OTU2326 (Prevotella)                    | 0        | 0        | 0        | 0        | 0        | 0.001022 | 0.002301 | 0        | 0        | 0.000481 |          |
| OTU280 (Leptotrichia)                   | 0.00047  | 0        | 0        | 0        | 0.00025  | 0        | 0        | 0        | 0.000164 | 0        |          |
| OTU2014 (Fusobacterium)                 | 0        | 0        | 3.93E-05 | 0        | 0        | 0.000504 | 0        | 0.001046 | 0.00014  | 0.021966 |          |
| OTU2555 (Fusobacterium)                 | 0        | 0        | 0        | 0        | 0        | 0.000445 | 0.00057  | 0.000224 | 0.00076  | 0.000863 |          |
| OTU122 (Capnocytophaga)                 | 8.83E-05 | 0.000156 | 0.000826 | 0        | 0.004367 | 0        | 0.000683 | 0.00231  | 0        | 0.008636 |          |
| OTU1968 (Prevotella)                    | 0        | 0        | 0        | 0        | 0        | 0        | 0.000159 | 0.000224 | 0        | 0        |          |
| OTU2254 (Bacteria_unclassified)         | 0.003297 | 0.000458 | 0        | 0.00047  | 0.001558 | 0.021829 | 0.003475 | 4.98E-05 | 0.019236 | 0.002257 |          |
| OTU317 (Leptotrichia)                   | 0.002376 | 0.000983 | 4.38E-05 | 0.000146 | 0.001087 | 0.016634 | 0.006778 | 0.000443 | 0.018227 | 0.007183 |          |
| OTU2337 (Leptotrichia)                  | 0        | 0.068664 | 0.003338 | 0        | 0        | 0.154483 | 0.245527 | 0.000741 | 0.227527 | 0.000426 |          |
| OTU875 (Leptotrichia)                   | 0.002726 | 0.004977 | 0.013738 | 0        | 0.175174 | 0.002338 | 0.07347  | 0.039128 | 0.018306 | 0.010685 |          |
| OTU2511 (Leptotrichia)                  | 0.000568 | 0.000849 | 0.001332 | 0        | 0.00024  | 0.000215 | 0.018747 | 0.000863 | 0.002626 | 0.00359  |          |
| OTU1612 (Leptotrichia)                  | 0.001331 | 0.421842 | 0.102672 | 0        | 0.010003 | 0.014153 | 0.137798 | 0.010595 | 0.039061 | 0.101837 |          |
| OTU2427 (Leptotrichia)                  | 0.000344 | 0.067018 | 0.016056 | 0        | 0.006069 | 0.008586 | 0.047769 | 0.00044  | 0.017352 | 0.017582 |          |
| OTU1994 (Bacteria_unclassified)         | 0        | 0.000171 | 0        | 0        | 0.00102  | 0        | 0        | 0.000252 | 0.000383 | 0        |          |
| OTU2854 (Actinobacteria_unclassified)   | 0        | 0.000101 | 0        | 0        | 0.002972 | 0.00047  | 0        | 0        | 0.000535 | 0        |          |
| OTU1412 (Prevotella)                    | 0        | 0.011041 | 1.96E-05 | 0        | 0.115311 | 0        | 0        | 0        | 0.000134 | 0        |          |
| OTU1995 (Veillonella)                   | 0.000852 | 0        | 1.81E-05 | 0.002124 | 0.003636 | 0.001526 | 0.000138 | 0.000282 | 0.000705 | 0        |          |
| OTU2815 (Actinomyces)                   | 0.005745 | 0        | 0        | 0.01665  | 0.017159 | 0.018972 | 0.000772 | 8.02E-05 | 0.007056 | 0.00268  |          |
| OTU687 (Actinomyces)                    | 0.000476 | 0.000134 | 8.91E-05 | 0.000204 | 0.010974 | 0.000885 | 0        | 0.00021  | 0.000754 | 0.00044  |          |

|                                         |          |          |          |          |          |          |          |          |          |          |
|-----------------------------------------|----------|----------|----------|----------|----------|----------|----------|----------|----------|----------|
| OTU376 (Actinomyces)                    | 0.042631 | 0        | 0.0012   | 0.028406 | 0.053082 | 0.01997  | 0.000227 | 4.15E-05 | 0.035384 | 0.001336 |
| OTU1475 (Actinomyces)                   | 0.035592 | 0.000127 | 0.000204 | 0.06375  | 0.011474 | 0.007055 | 0.000113 | 0.000113 | 0.027118 | 0.00044  |
| OTU1343 (Actinomyces)                   | 0.057332 | 0.000529 | 1.51E-05 | 0.108249 | 0.010195 | 0.073883 | 0.001122 | 0.000324 | 0.01506  | 0.000934 |
| OTU2312 (Actinomyces)                   | 0.007568 | 0        | 0.000471 | 0.008469 | 0.027181 | 0.070037 | 0.000371 | 3.87E-05 | 0.014009 | 0        |
| OTU1051 (Citrobacter)                   | 0        | 0        | 0.00031  | 0        | 0        | 0        | 0        | 0        | 0        | 0        |
| OTU1072 (Bergeyella)                    | 0.000145 | 0.00029  | 0.002556 | 0        | 0.000914 | 0        | 0        | 0.000349 | 0.000359 | 0        |
| OTU1452 (Oribacterium)                  | 0        | 0.002315 | 0.000109 | 0        | 0        | 0.000729 | 0.000138 | 0.001322 | 0.000255 | 0.000931 |
| OTU2540 (Oribacterium)                  | 0.000287 | 0.012492 | 0.001585 | 0        | 0.002097 | 0.004061 | 0.003334 | 0.011278 | 0.002765 | 0.017868 |
| OTU1843 (Candidatus_Saccharimonas)      | 0        | 0.003019 | 0        | 0        | 0        | 0.00045  | 0        | 0.000913 | 0        | 0        |
| OTU1166 (Solobacterium)                 | 0.000464 | 0.011443 | 0.011004 | 0.001241 | 0.013071 | 0.002617 | 0.000978 | 0.006022 | 0.007488 | 0.000488 |
| OTU2622 (Candidate_division_TM7_norank) | 0.000114 | 0.096515 | 0.009983 | 0        | 0.164046 | 0.003185 | 0.002173 | 0.032622 | 0.004303 | 0.000464 |
| OTU1794 (Gemella)                       | 0.000133 | 0.000491 | 0.015568 | 0.003423 | 0.005636 | 0.004041 | 0.000426 | 0.001059 | 0.013881 | 0.004163 |
| OTU2249 (Solobacterium)                 | 0        | 0        | 0        | 0.000162 | 0        | 0.000523 | 0.000104 | 0.00016  | 0.000541 | 0        |
| OTU2344 (Streptococcus)                 | 0.000278 | 0        | 0        | 0.000146 | 0        | 0.000269 | 0.000325 | 5.26E-05 | 0.000675 | 0        |
| OTU281 (Lactobacillales_unclassified)   | 0.000233 | 0        | 0        | 0        | 0        | 0.000274 | 0        | 0        | 0        | 0        |
| OTU2136 (Streptococcus)                 | 0        | 0        | 2.57E-05 | 0        | 0.0005   | 0.000494 | 0.000129 | 0        | 0        | 0        |
| OTU2580 (Actinomyces)                   | 0.057739 | 0        | 0.000347 | 0.008221 | 0.099499 | 0.005885 | 0        | 0.000243 | 0.002364 | 0.001354 |
| OTU2673 (Actinomyces)                   | 0.012465 | 0        | 0        | 0.001713 | 0.000587 | 0        | 0        | 0        | 0        | 0        |
| OTU433 (Rothia)                         | 0.110229 | 0.018359 | 0.00368  | 0.000643 | 0.028287 | 0.002994 | 0        | 0.008166 | 0.002273 | 0.003167 |
| OTU2119 (Rothia)                        | 0.610842 | 0.035854 | 0.032216 | 0.041429 | 0.024343 | 0.015831 | 0.000116 | 0.097691 | 0.029574 | 0.14548  |
| OTU181 (Granulicatella)                 | 0.019951 | 0.098502 | 0.042187 | 0.097722 | 0.0078   | 0.01451  | 0.000503 | 0.012215 | 0.034265 | 0.017439 |
| OTU2399 (Rothia)                        | 0.000953 | 0        | 0        | 0.000422 | 0        | 0        | 0        | 4.98E-05 | 0.000188 | 0        |

| CP42     | CP41     | CP40     | CP39     | CP45     | CP54     | CP55     | CP56     | CP72     | CP71     | CP70     | CP69     | CP68     | CP67     | CP66     |          |
|----------|----------|----------|----------|----------|----------|----------|----------|----------|----------|----------|----------|----------|----------|----------|----------|
|          | 0        | 0.000339 | 0        | 0.00081  | 0.000661 | 0.002042 | 0.010017 | 0.030483 | 0.002028 | 6.36E-05 | 0.095294 | 0.001888 | 0.002556 | 0.000158 | 0.063626 |
|          | 0        | 0        | 0        | 0        | 0        | 0        | 0        | 0.000544 | 0        | 0        | 0        | 0        | 0        | 0        | 0        |
|          | 0        | 0        | 0        | 0        | 0        | 0        | 0.010898 | 0        | 0.002078 | 0        | 0        | 0        | 0        | 0        | 0        |
|          | 0        | 0        | 0.003911 | 0.000703 | 0        | 0.000454 | 0        | 0.007963 | 0        | 0        | 0.008264 | 0.000157 | 0.009256 | 0        | 0        |
|          | 0        | 0.000315 | 0        | 0.000798 | 0        | 0.000734 | 0        | 0.012137 | 0.004224 | 0        | 0.013039 | 0.00036  | 0.017328 | 0        | 0        |
|          | 0        | 0        | 0.001287 | 0        | 0        | 0        | 0        | 0.002473 | 0        | 0        | 0        | 0        | 0        | 0        | 0        |
| 0.001369 | 0.00066  | 0.001369 | 0        | 0        | 0.001908 | 0        | 0.011042 | 0.002112 | 0        | 0.000493 | 0.002157 | 0.022137 | 0.000168 | 0        | 0        |
| 0.004316 | 0.008251 | 0.009549 | 0.016306 | 0.01035  | 0.050204 | 0.003608 | 0.017412 | 0.017015 | 0.020276 | 0.030635 | 0.000708 | 0.137283 | 0.000246 | 0.000207 | 0        |
|          | 0        | 0.000654 | 0        | 0        | 0        | 0        | 0        | 0        | 0.000304 | 0.000356 | 0        | 0.002816 | 0        | 0        | 0        |
|          | 0        | 0        | 0        | 0        | 0        | 0        | 0        | 0        | 0        | 0        | 0        | 0        | 0        | 0        | 0        |
|          | 0        | 0.000323 | 0        | 0        | 0        | 0        | 0        | 0.001049 | 0        | 0        | 0        | 0        | 0        | 0.000168 | 0        |
|          | 0        | 0        | 0        | 0        | 0        | 0        | 0        | 0.003193 | 0        | 0        | 0        | 0        | 0        | 0        | 0        |
| 0.001391 | 0.010267 | 0.002656 | 0.001346 | 0.00118  | 0.001775 | 0.024944 | 0.113717 | 0.004123 | 0.002131 | 0.003077 | 0.00291  | 0.001271 | 0.007299 | 0.196189 | 0        |
|          | 0        | 0.000996 | 0.001157 | 0        | 0        | 0        | 0        | 0.010498 | 0        | 0.000142 | 0.001087 | 0        | 0.001473 | 0.001206 | 0.021155 |
|          | 0        | 0.000694 | 0        | 0        | 0        | 0        | 0        | 0        | 0.000503 | 0.000566 | 0        | 0        | 0        | 0        | 0.00016  |
|          | 0        | 0.064494 | 0        | 0.001572 | 0.016491 | 0.102976 | 0.048649 | 0.193704 | 0.157565 | 0.050095 | 0.036918 | 0.010461 | 0.057024 | 0.000652 | 0.066007 |
|          | 0        | 0.000328 | 0        | 0        | 0        | 0        | 0        | 0.003277 | 0        | 0.003702 | 0.004146 | 0.000595 | 0        | 0.00016  | 0.000113 |
|          | 0        | 0.000622 | 0        | 0        | 0        | 0        | 0        | 0.002037 | 0        | 0.010541 | 0.003086 | 0.000225 | 0.002874 | 0        | 0.000135 |
|          | 0        | 0.004903 | 0        | 0.017343 | 0.000631 | 0.122437 | 0        | 0.014916 | 0.021121 | 0.007586 | 0.130385 | 0.483759 | 0.023653 | 0.035033 | 0.011769 |
|          | 0        | 0        | 0        | 0        | 0        | 0        | 0        | 0.003553 | 0        | 0        | 0        | 0.000169 | 0        | 9.97E-05 | 0        |
|          | 0        | 0        | 0        | 0.00081  | 0        | 0.009207 | 0        | 0.005207 | 0        | 0.005385 | 0.007332 | 0.000169 | 0        | 0.006344 | 0        |
|          | 0        | 0        | 0        | 0        | 0        | 0        | 0        | 0.000597 | 0.002112 | 0        | 0        | 0        | 0        | 0        | 0        |
| 0.002815 | 0.412348 | 0        | 0        | 0.003179 | 0.129089 | 0.069613 | 0.019396 | 0.121017 | 0.000179 | 0.030078 | 0.000371 | 0.004144 | 4.62E-05 | 0.000342 | 0        |
| 0.001249 | 0.004892 | 0        | 0        | 0        | 0        | 0.003076 | 0        | 0.00157  | 0        | 0        | 0        | 0        | 0        | 0        | 6.27E-05 |
| 0.001358 | 0.029153 | 0        | 0        | 0.00124  | 0.016799 | 0.314369 | 0.018117 | 0.225508 | 0        | 0.000511 | 0        | 0        | 0        | 0        | 0        |
|          | 0        | 0.006214 | 0        | 0        | 0        | 0.001748 | 0.006868 | 0.002672 | 0.002011 | 0        | 0        | 0        | 0        | 0        | 0        |
|          | 0        | 0.010892 | 0        | 0        | 0        | 0.000627 | 0.207067 | 0.011486 | 0.018587 | 0        | 0        | 0        | 0        | 0        | 0        |
|          | 0        | 0.00232  | 0        | 0        | 0        | 0.000767 | 0.016179 | 0.007527 | 0.01247  | 0        | 0        | 0        | 0        | 0        | 0        |
|          | 0        | 0        | 0        | 0        | 0        | 0        | 0        | 0        | 0        | 0        | 0        | 0        | 0        | 0        | 0        |
|          | 0        | 0.000334 | 0        | 0        | 0        | 0.000153 | 0.001674 | 0        | 0        | 0        | 0        | 0        | 0        | 0        | 0        |
|          | 0        | 0        | 0        | 0        | 0        | 0.0002   | 0.003571 | 0.001646 | 0        | 0        | 0        | 0        | 0        | 0        | 0        |
| 0.001413 | 0        | 0        | 0        | 0        | 0        | 0.000587 | 0.00367  | 0.003216 | 0.002078 | 0        | 0        | 0        | 0        | 0        | 0        |
|          | 0        | 0.000336 | 0        | 0.000798 | 0        | 0.000694 | 0.005405 | 0.003706 | 0        | 5.49E-05 | 0.000374 | 0        | 0        | 0        | 0        |
|          | 0        | 0.003279 | 0        | 0.000679 | 0.000631 | 0.001828 | 0.030523 | 0.020682 | 0.008685 | 0.001261 | 0.000356 | 0        | 0.001343 | 0.000912 | 0.006184 |
| 0.001512 | 0.014712 | 0        | 0.000774 | 0.00808  | 0.004043 | 0.06396  | 0.057965 | 0.014734 | 0.007019 | 0.001242 | 0.000157 | 0        | 0.004399 | 0.028671 | 0        |
|          | 0        | 0        | 0        | 0        | 0        | 0.00018  | 0        | 0        | 0        | 0        | 0        | 0        | 0        | 0        | 0        |
|          | 0        | 0        | 0        | 0        | 0        | 0        | 0        | 0        | 0        | 0        | 0        | 0        | 0        | 0        | 0        |
|          | 0        | 0.000299 | 0        | 0        | 0        | 0.001798 | 0.000475 | 0        | 0        | 0        | 0        | 0        | 0        | 0        | 0        |
|          | 0        | 0        | 0        | 0        | 0        | 0        | 0        | 0        | 0.000101 | 0        | 0        | 0        | 8.51E-05 | 0        | 0        |
| 0.001523 | 0        | 0        | 0.004514 | 0        | 0.003429 | 0.001736 | 0.003752 | 0.001977 | 7.52E-05 | 0.005926 | 0.003427 | 0        | 0        | 0        | 0        |
|          | 0        | 0        | 0        | 0.000631 | 0.000661 | 0.025679 | 0.007178 | 0.009709 | 0.010155 | 0        | 0.004958 | 0.016022 | 0.214755 | 0        | 0        |
|          | 0        | 0        | 0        | 0        | 0        | 0.014271 | 0.003533 | 0        | 0.012774 | 0        | 0.002036 | 0.00491  | 0.144316 | 0        | 0        |
|          | 0        | 0.000313 | 0        | 0        | 0        | 0.000247 | 0        | 0        | 0        | 0        | 0        | 0        | 0        | 0        | 0        |
| 0.00138  | 0.001301 | 0        | 0.001691 | 0        | 0.002515 | 0        | 0        | 0.001842 | 0        | 0.00053  | 0        | 0        | 0        | 0        | 0        |
|          | 0        | 0.000694 | 0        | 0.002489 | 0        | 0.001548 | 0        | 0        | 0        | 0        | 0.000101 | 0        | 0        | 0        | 0        |
|          | 0        | 0.002339 | 0        | 0.000679 | 0        | 0.000113 | 0.005368 | 0.000995 | 0.002298 | 0.000521 | 0.000594 | 0        | 0        | 0        | 0        |
| 0.001369 | 0.004371 | 0        | 0        | 0.002548 | 0.00046  | 0.00703  | 0.001639 | 0        | 6.07E-05 | 0.000201 | 0        | 0.004014 | 0        | 0        | 0        |
|          | 0        | 0.000321 | 0        | 0        | 0.000601 | 0.000367 | 0        | 0        | 0.001994 | 0        | 0.000183 | 0.000393 | 0.003986 | 0.010767 | 6.27E-05 |
|          | 0        | 0        | 0        | 0        | 0.000669 | 0        | 0        | 0        | 0.002298 | 0        | 0        | 0.000416 | 0.020346 | 9.97E-05 | 0        |
| 0.058524 | 0.002911 | 0.002607 | 0.007242 | 0.03931  | 0.000754 | 0.005257 | 0.008308 | 0.006353 | 0        | 0.001424 | 0        | 0.007783 | 0        | 0        | 0        |
| 0.019322 | 0.002641 | 0        | 0.012924 | 0.014905 | 0.008393 | 0.001822 | 0.002665 | 0.012892 | 0.001498 | 0        | 0.114201 | 0        | 6.57E-05 | 0.000802 | 0        |
| 0.128253 | 0        | 0        | 0.014186 | 0.088526 | 0.134886 | 0.007153 | 0.025062 | 0.165692 | 0.000202 | 0        | 0.009899 | 0.017993 | 6.57E-05 | 0.000141 | 0        |
| 0.001369 | 0.014248 | 0        | 0.005217 | 0.005735 | 0.14897  | 0        | 0.001072 | 0.00218  | 0.009249 | 0.01093  | 0.297334 | 0.002888 | 0.000545 | 0.000567 | 0        |
|          | 0        | 0        | 0        | 0        | 0.000586 | 0.007012 | 0        | 0.00111  | 0        | 0.000425 | 0.000466 | 0.004506 | 0.005487 | 0.000129 | 0        |
| 0.006769 | 0.000347 | 0        | 0.001477 | 0.013439 | 0.057382 | 0.00186  | 0.029258 | 0.004241 | 0.013248 | 0.067252 | 0.028943 | 0.009285 | 0.000973 | 0.000652 | 0        |
| 0.002957 | 0        | 0        | 0.000762 | 0.006321 | 0.010334 | 0        | 0.005819 | 0.006505 | 0.001455 | 0.000776 | 0.005236 | 0.003827 | 0.000114 | 0        | 0        |
| 0.004338 | 0        | 0        | 0.002918 | 0.001233 | 0        | 0        | 0.001049 | 0        | 0        | 0.000411 | 0        | 0.001458 | 0        | 0        | 0        |
| 0.020483 | 0.000352 | 0.001222 | 0.00374  | 0.021106 | 0        | 0        | 0.003116 | 0.002129 | 0        | 0.000347 | 0        | 0.010772 | 0        | 0        | 0        |
| 0.103378 | 0        | 0.936793 | 0        | 0        | 0        | 0        | 0.014817 | 0        | 0        | 0.052642 | 0.000404 | 0        | 0        | 0        | 0        |
| 0.015718 | 0.001007 | 0        | 0.009279 | 0.002578 | 0.000887 | 0        | 0.005551 | 0.004545 | 0.000162 | 0.006392 | 0.000146 | 0.021574 | 0.000535 | 0.000107 | 0        |
| 0.120882 | 0.010723 | 0.01812  | 0.074468 | 0.106122 | 0.003529 | 0.007253 | 0.036234 | 0.013129 | 0.000564 | 0.028727 | 0        | 0.11815  | 0.000627 | 0        | 0        |
| 0.010121 | 0.001383 | 0        | 0.018272 | 0.009997 | 0.000347 | 0        | 0.004135 | 0.004275 | 0.001067 | 0.042214 | 0.000169 | 0.017935 | 0.008615 | 0.000191 | 0        |

|          |          |          |          |          |          |          |          |          |          |          |          |          |          |          |
|----------|----------|----------|----------|----------|----------|----------|----------|----------|----------|----------|----------|----------|----------|----------|
| 0.137027 | 0.016489 | 0.009744 | 0.13643  | 0.195054 | 0.000287 | 0.012621 | 0.039971 | 0.01269  | 0.004182 | 0.016948 | 0.000169 | 0.01366  | 0.003932 | 0.000655 |
| 0.031097 | 0.006039 | 0.006469 | 0.034947 | 0.03347  | 0.000507 | 0.001698 | 0.013124 | 0        | 0.002585 | 0.01104  | 0        | 0.001242 | 0.005417 | 0.000335 |
| 0.051141 | 0.01024  | 0        | 0.027896 | 0.050224 | 0.003336 | 0.003757 | 0.011325 | 0.008668 | 0.002854 | 0.031795 | 0        | 0.027335 | 0.00834  | 0.000144 |
| 0.052423 | 0.005952 | 0.001385 | 0.021928 | 0.056064 | 0.000747 | 0        | 0.002144 | 0.004275 | 0.002704 | 0.023997 | 0        | 0.01548  | 0.005481 | 0.000295 |
| 0        | 0        | 0        | 0        | 0        | 0        | 0        | 0        | 0        | 0.000234 | 0        | 0        | 0        | 0        | 5.95E-05 |
| 0        | 0.000686 | 0        | 0        | 0.001781 | 0        | 0        | 0        | 0        | 0.003494 | 0        | 0.000921 | 0        | 0.000187 | 0        |
| 0        | 0.001277 | 0        | 0.002978 | 0.037739 | 0.001007 | 0.001872 | 0        | 0.001977 | 0.000824 | 0.001214 | 0        | 0        | 0        | 6.27E-05 |
| 0.00287  | 0.00792  | 0        | 0.074326 | 0.035642 | 0.031557 | 0.007079 | 0.018492 | 0.006167 | 0.036884 | 0.005844 | 0.000169 | 0.002888 | 9.73E-05 | 5.64E-05 |
| 0        | 0.000313 | 0        | 0.000893 | 0.001804 | 0        | 0        | 0.002535 | 0        | 0.002319 | 0        | 0.000191 | 0        | 6.32E-05 | 0        |
| 0        | 0.004061 | 0        | 0.006301 | 0.040768 | 0.030262 | 0.001835 | 0.063677 | 0.002078 | 0.048331 | 0.031238 | 0.000169 | 0.015047 | 0.003842 | 0.021773 |
| 0.018643 | 0.005178 | 0        | 0        | 0.017257 | 0.01738  | 0.025205 | 0.025698 | 0.012402 | 0.05231  | 0.047866 | 0.000697 | 0.004231 | 0.000635 | 0.000279 |
| 0.001435 | 0.006487 | 0        | 0.165779 | 0.015348 | 0.011302 | 0        | 0.003109 | 0.008601 | 0.206676 | 0.000393 | 0.005    | 0.001415 | 0.003385 | 0.000144 |
| 0        | 0.000686 | 0        | 0.001572 | 0.002443 | 0.003169 | 0        | 0.003009 | 0        | 0.002418 | 0.000292 | 0        | 0        | 4.13E-05 | 0        |
| 0.001566 | 0.002334 | 0        | 0.010744 | 0.004668 | 0.010007 | 0        | 0.024488 | 0        | 0.003042 | 0.000219 | 0        | 0        | 6.08E-05 | 0        |
| 0        | 0.001732 | 0        | 0.001632 | 0.003585 | 0        | 0.00336  | 0        | 0.00223  | 0.002337 | 0        | 0        | 0        | 0.000355 | 0        |
| 0        | 0.014124 | 0.001271 | 0.107629 | 0.07853  | 0        | 0.043082 | 0.002558 | 0.037461 | 0.153408 | 0.0061   | 0.000449 | 0        | 0.180011 | 0        |
| 0.095952 | 0.008264 | 0        | 0.078054 | 0.024368 | 0.0005   | 0.005232 | 0.005988 | 0.002129 | 0.012812 | 0.198121 | 0        | 0.022946 | 0.011166 | 5.01E-05 |
| 0.00402  | 0.000336 | 0        | 0.005372 | 0.001834 | 0        | 0.001822 | 0.000452 | 0        | 0.000145 | 0.000895 | 0        | 0        | 0.000139 | 0        |
| 0.008587 | 0.015252 | 0.001255 | 0.003287 | 0.002518 | 0.000307 | 0.003298 | 0        | 0.001977 | 0.019368 | 0.002356 | 0.00064  | 0        | 0.007616 | 0.003363 |
| 0.060857 | 0.057771 | 0        | 0.081377 | 0.018272 | 0.002622 | 0.010935 | 0.038232 | 0.024551 | 0.182996 | 0.018956 | 0.001067 | 0.008029 | 0.667408 | 0.263883 |
| 0.022575 | 0.212594 | 0.001206 | 0.035579 | 0.021263 | 0.014357 | 0.007203 | 0.008645 | 0.002045 | 0.121556 | 0.009478 | 0.000337 | 0        | 0.022173 | 0.311759 |
| 0        | 0.001687 | 0        | 0.000846 | 0.000586 | 0        | 0        | 0        | 0        | 0.000651 | 0        | 0        | 0        | 0.000141 | 0        |

| CP65     | CP64     | CP63     | CP62     | CP61     | CP60     | CP58     | CP57     | CP38     | CP37     | CP59     | CP35     | CP15     | CP14     | CP13     |
|----------|----------|----------|----------|----------|----------|----------|----------|----------|----------|----------|----------|----------|----------|----------|
| 0.008674 | 0.000401 | 0.049608 | 0.000133 | 0.010793 | 0.003254 | 0        | 0.004768 | 0.00197  | 0.020281 | 0        | 0.001267 | 0.000127 | 0.007123 | 0.042328 |
| 0        | 0        | 0.004655 | 0        | 0.00593  | 6.56E-05 | 0        | 0        | 0        | 0        | 0        | 0        | 0        | 0        | 0        |
| 0        | 0        | 0.0192   | 0        | 0.037617 | 6.11E-05 | 0        | 0.001203 | 0        | 0        | 0        | 0        | 0        | 0        | 0        |
| 0.008148 | 0        | 0.000702 | 0        | 0.000415 | 0        | 0.00271  | 0        | 0.004467 | 0        | 0        | 0        | 0        | 0.003956 | 0.000575 |
| 0.007623 | 0.000198 | 0.000423 | 0        | 0.000665 | 5.88E-05 | 0        | 0        | 0.004552 | 0        | 0        | 0        | 0        | 0        | 0.00018  |
| 0.000403 | 0        | 0        | 0        | 0        | 0        | 0        | 0        | 0        | 0        | 0        | 5.99E-05 | 0        | 0        | 0        |
| 0.002996 | 0        | 0.000142 | 0        | 0.001487 | 0.000548 | 0        | 0        | 0.004484 | 0        | 0        | 0.000521 | 0        | 0        | 0.00018  |
| 0.043791 | 0.000361 | 0.009813 | 0.002316 | 0.007826 | 0.008699 | 0.04916  | 0.008731 | 0.006641 | 0        | 0        | 0.003338 | 0.000122 | 0.033998 | 0.00246  |
| 0        | 0        | 0.000159 | 0        | 0.000146 | 6.79E-05 | 0.006048 | 0        | 0        | 0        | 0        | 0        | 0        | 0        | 0        |
| 0        | 0        | 6.87E-05 | 0        | 0.000377 | 0.000274 | 0        | 0        | 0        | 0.001551 | 0        | 0.000473 | 0.000199 | 0        | 9.22E-05 |
| 0        | 0        | 0.000423 | 0        | 0.00039  | 4.07E-05 | 0        | 0        | 0        | 0.001668 | 0        | 0.00019  | 0.000637 | 0        | 0        |
| 0        | 6.97E-05 | 0.000137 | 0        | 0        | 0.000835 | 0        | 0.002384 | 0        | 0        | 0        | 0.000164 | 0        | 0.000954 | 0        |
| 0.007675 | 0.000441 | 0.085567 | 0.002118 | 0.143756 | 0.275484 | 0        | 0.061608 | 0.006743 | 0.118891 | 0        | 0.048843 | 0.81711  | 0.002019 | 0.014964 |
| 0.001875 | 7.18E-05 | 0.01003  | 0.000121 | 0.0109   | 0.038251 | 0        | 0.007281 | 0        | 0.010305 | 0        | 0.001756 | 0.056831 | 0        | 0.001157 |
| 0        | 5.28E-05 | 0.000839 | 0.004895 | 0.000763 | 0.001527 | 0        | 0        | 0        | 0        | 0        | 0.000344 | 0        | 0.002913 | 0.001017 |
| 0.004539 | 0.02285  | 0.165486 | 0.536229 | 0.114851 | 0.297442 | 0.00871  | 0.335037 | 0.109694 | 0.000126 | 0        | 0.05509  | 0.001642 | 0.485389 | 0.428988 |
| 0.000613 | 0        | 0.005708 | 0.000328 | 0.000863 | 0.0068   | 0.003048 | 0.001138 | 0.004195 | 0        | 0        | 0.000473 | 0.000229 | 0        | 0.00923  |
| 0        | 8.24E-05 | 0.000852 | 5.08E-05 | 0.000153 | 0.00165  | 0        | 0        | 0        | 0        | 0        | 0.000306 | 0        | 0.000984 | 0.002931 |
| 0.007763 | 7.39E-05 | 0.057631 | 0.008693 | 0.014321 | 0.033349 | 0.00329  | 0.008752 | 0.01741  | 0        | 0.066762 | 0.001546 | 0        | 0.018665 | 0.002846 |
| 0        | 0        | 0        | 0        | 0        | 0.006273 | 0        | 0.001117 | 0.001953 | 0        | 0        | 0        | 0        | 0.000991 | 0.000456 |
| 0        | 0        | 0.000159 | 0        | 0.000493 | 0.011912 | 0        | 0        | 0        | 0        | 0        | 0.000274 | 0        | 0        | 0.001293 |
| 0        | 0        | 7.08E-05 | 0        | 0.001626 | 0.00513  | 0        | 0        | 0.008629 | 0        | 0        | 0.000128 | 0        | 0        | 0.008051 |
| 0.005415 | 0.92388  | 0.094011 | 0.111641 | 0.016905 | 0.002283 | 0.002806 | 0.02878  | 0.010854 | 0.000371 | 0.0005   | 0.75867  | 0.002014 | 0.00602  | 0.132112 |
| 0        | 0.000182 | 0.000242 | 0.000259 | 0        | 0        | 0        | 0        | 0        | 0        | 0        | 0.000833 | 0        | 0        | 0.000769 |
| 0.000386 | 0.010381 | 0.001064 | 0.000842 | 0.004885 | 0.016746 | 0        | 0.292222 | 0.245121 | 0        | 0        | 0.004161 | 0        | 0.035138 | 0.002169 |
| 0        | 0.008109 | 0.000221 | 0.000898 | 0        | 0.00029  | 0        | 0        | 0        | 0        | 0        | 0.001732 | 0        | 0        | 0.000286 |
| 0        | 0.00541  | 0        | 0.000733 | 0        | 0.004458 | 0        | 0.101867 | 0.015372 | 0        | 0.000231 | 0.000318 | 0        | 0.001036 | 8.49E-05 |
| 0        | 0.000667 | 0.000251 | 0.00077  | 0.000552 | 0.001462 | 0        | 0.007206 | 0        | 0        | 0        | 0.001215 | 0        | 0        | 0        |
| 0        | 0        | 0        | 5.08E-05 | 0        | 0.000201 | 0        | 0        | 0        | 0        | 0        | 0        | 0        | 0        | 0        |
| 0        | 0        | 0        | 0        | 0        | 0        | 0        | 0.001203 | 0        | 0        | 0        | 0        | 0        | 0        | 0        |
| 0        | 0        | 0        | 6.84E-05 | 0        | 0        | 0        | 0        | 0        | 0        | 0        | 6.19E-05 | 0        | 0        | 8.74E-05 |
| 0        | 7.18E-05 | 0        | 0        | 0.000156 | 0        | 0        | 0.001246 | 0.002106 | 0        | 0.001189 | 0        | 0        | 0        | 8.49E-05 |
| 0        | 0        | 0        | 5.08E-05 | 0        | 0        | 0        | 0.002341 | 0.002157 | 0        | 0.003942 | 0        | 0        | 0        | 0        |
| 0        | 0.000498 | 0.002466 | 0.006023 | 0.003665 | 0.007375 | 0.003145 | 0.012167 | 0        | 0        | 0.027272 | 0.000925 | 0.000117 | 0.000976 | 0.000764 |
| 0.003925 | 0.00302  | 0.010331 | 0.032822 | 0.013308 | 0.037481 | 0.005564 | 0.021123 | 0.004433 | 0        | 0.138983 | 0.005684 | 0.000963 | 0.006855 | 0.002206 |
| 0        | 0        | 7.73E-05 | 5.79E-05 | 0        | 0.000174 | 0        | 0        | 0        | 0        | 0        | 0        | 0        | 0        | 0        |
| 0        | 0        | 0        | 0        | 0        | 0        | 0        | 0.001267 | 0        | 0        | 0.000226 | 0        | 0        | 0        | 0        |
| 0        | 0        | 0        | 5.44E-05 | 0        | 0.000238 | 0        | 0        | 0        | 0        | 0.003334 | 0        | 0        | 0        | 0        |
| 0        | 0        | 0.000157 | 0        | 0        | 6.34E-05 | 0        | 0        | 0        | 0        | 0.003216 | 6.39E-05 | 0        | 0        | 0        |
| 0.003505 | 0.000112 | 0.000464 | 0.000598 | 0.000649 | 0        | 0        | 0        | 0        | 0        | 0.000506 | 5.79E-05 | 0        | 0        | 0.000182 |
| 0.054988 | 0.000103 | 0.000403 | 0.00027  | 0.000964 | 0.000161 | 0.009097 | 0        | 0.002157 | 0        | 0        | 9.19E-05 | 0        | 0.027546 | 0.002118 |
| 0.01854  | 6.97E-05 | 0.000255 | 5.26E-05 | 0        | 0.000158 | 0        | 0        | 0        | 0        | 0        | 5.59E-05 | 9.69E-05 | 0.00494  | 0.000531 |
| 0        | 0        | 5.79E-05 | 0        | 0        | 0        | 0        | 0        | 0        | 0        | 0        | 0        | 0        | 0.000946 | 0        |
| 0.000596 | 0        | 0.000408 | 0        | 0        | 0        | 0        | 0        | 0.00445  | 0        | 0        | 0        | 0        | 0.015982 | 0        |
| 0        | 0        | 0        | 0.000387 | 0        | 0        | 0        | 0        | 0        | 0        | 0        | 0        | 0        | 0        | 0        |
| 0        | 0.000275 | 0.000755 | 0.001574 | 0.000727 | 0.001116 | 0        | 0.003705 | 0        | 0        | 0        | 0.000282 | 0        | 0        | 0.000429 |
| 0        | 0.00012  | 0        | 0.000198 | 0.000162 | 0.000683 | 0        | 0.006078 | 0.012994 | 0        | 0        | 4.99E-05 | 0        | 0.013099 | 0.001388 |
| 0        | 8.24E-05 | 0.007292 | 0        | 0.005239 | 0.018617 | 0        | 0.019147 | 0        | 0        | 0        | 0.000555 | 0        | 0        | 0.023161 |
| 0        | 0        | 0.000172 | 0        | 0        | 7.92E-05 | 0        | 0.001299 | 0        | 0        | 0        | 0        | 0        | 0        | 9.71E-05 |
| 0.000543 | 0.000127 | 0        | 0.000168 | 0.002084 | 7.92E-05 | 0        | 0.00232  | 0.004331 | 0        | 0        | 0.00011  | 0        | 0.009761 | 0.003271 |
| 0        | 0.000131 | 0.000406 | 0.000242 | 0        | 0.001122 | 0        | 0        | 0.002191 | 0        | 0        | 0.00017  | 0        | 0.000984 | 0        |
| 0        | 0.002027 | 0.000618 | 0.002088 | 0.015759 | 0.004028 | 0        | 0.001299 | 0.00214  | 0        | 0        | 0.000272 | 0        | 0.04177  | 0.000723 |
| 0        | 0.010919 | 0.009476 | 0.132253 | 0.02575  | 0.027703 | 0        | 0.008398 | 0        | 0        | 0        | 0.001035 | 0.000464 | 0.010826 | 0.010247 |
| 0        | 0        | 0.000195 | 6.31E-05 | 0.002386 | 0.001107 | 0        | 0        | 0        | 0        | 0        | 6.79E-05 | 0        | 0.00298  | 0.000985 |
| 0.001665 | 0.001535 | 0.002712 | 0.018089 | 0.0161   | 0.044451 | 0.003048 | 0.003597 | 0.004195 | 0        | 0.000645 | 0.004479 | 0.000214 | 0.009999 | 0.035189 |
| 0        | 0.0009   | 0.000607 | 0.01704  | 0.003655 | 0.002602 | 0        | 0.002556 | 0        | 0        | 0.000264 | 0.000989 | 8.16E-05 | 0.003964 | 0.00304  |
| 0.000631 | 0        | 0.000187 | 0        | 0        | 0        | 0.025645 | 0        | 0.002089 | 0.00161  | 0.000613 | 0        | 0        | 0        | 0.000155 |
| 0.005923 | 0        | 9.01E-05 | 0        | 0        | 0        | 0.002903 | 0        | 0        | 0.000603 | 0        | 0        | 9.18E-05 | 0        | 0.000364 |
| 0.119298 | 0        | 0.010202 | 0        | 0.00086  | 0        | 0        | 0        | 0.019398 | 0        | 0.018344 | 0        | 0.000347 | 0        | 0.000551 |
| 0.006449 | 0        | 0.000682 | 0.000238 | 0.000604 | 9.73E-05 | 0.086466 | 0        | 0.008459 | 0.00287  | 0.005378 | 0        | 0.001035 | 0.008703 | 0.000269 |
| 0.027284 | 0.000175 | 0.000208 | 0        | 0.001655 | 6.56E-05 | 0.117192 | 0.001289 | 0.034889 | 0.01476  | 0.001156 | 0.000278 | 0.008366 | 0.04592  | 0.012567 |
| 0.016822 | 0        | 0.004339 | 0        | 0.001886 | 0        | 0.005758 | 0.001278 | 0.002157 | 0.003211 | 0        | 0.001161 | 8.67E-05 | 0.000976 | 0.003535 |

|          |          |          |          |          |          |          |          |          |          |          |          |          |          |          |
|----------|----------|----------|----------|----------|----------|----------|----------|----------|----------|----------|----------|----------|----------|----------|
| 0.036186 | 0        | 0.000925 | 0.000686 | 0.003269 | 0        | 0.011226 | 0.001149 | 0.093744 | 0.028965 | 0.001468 | 0.006607 | 0.005332 | 0.003979 | 0.028276 |
| 0.041811 | 5.28E-05 | 0.000365 | 0        | 0.000487 | 0.000204 | 0.00571  | 0.001246 | 0.008493 | 0.016714 | 0        | 0.00328  | 0.030623 | 0.0031   | 0.004831 |
| 0.014106 | 9.71E-05 | 0.000588 | 0.000135 | 0.002665 | 0        | 0.020661 | 0        | 0.058142 | 0.034642 | 0        | 0.002587 | 0.001137 | 0.037389 | 0.006195 |
| 0.035572 | 6.33E-05 | 0.000652 | 0.000198 | 0.001233 | 6.11E-05 | 0.006193 | 0        | 0.072342 | 0.002934 | 0        | 0.002703 | 0.003956 | 0.015192 | 0.005865 |
| 0        | 0        | 0        | 0        | 0        | 0        | 0        | 0        | 0        | 0        | 0        | 0        | 0        | 0        | 0        |
| 0        | 5.49E-05 | 0.000706 | 0.005633 | 0.000604 | 0.00441  | 0        | 0        | 0        | 0        | 0        | 0.000276 | 9.69E-05 | 0        | 0.000546 |
| 0.000438 | 0        | 0.001105 | 0.000174 | 0.00321  | 0.000462 | 0        | 0.001246 | 0.011126 | 0        | 0        | 0.00032  | 0        | 0.003055 | 0.00545  |
| 0        | 0.000262 | 0.018599 | 0.002376 | 0.019463 | 0.04179  | 0.002903 | 0.01294  | 0.02891  | 0        | 0.000237 | 0.004853 | 0.000117 | 0.021973 | 0.026255 |
| 0        | 0        | 0.00553  | 0        | 0.000438 | 0.003082 | 0        | 0        | 0        | 0        | 0        | 9.59E-05 | 0        | 0        | 0.000769 |
| 0.004468 | 0.000532 | 0.026932 | 0.009489 | 0.021024 | 0.00475  | 0        | 0.0048   | 0.017733 | 0.000388 | 0.005405 | 0.003988 | 0.000199 | 0.066708 | 0.055504 |
| 0.104316 | 0.000245 | 0.280967 | 0.002879 | 0.135784 | 0.014906 | 0        | 0.001085 | 0.021572 | 0        | 0        | 0.004295 | 0.000393 | 0.014902 | 0.057637 |
| 0        | 0        | 0.005455 | 0.000943 | 0.002626 | 0.008475 | 0.015435 | 0.004704 | 0        | 0        | 0.14092  | 0.003434 | 0.000433 | 0.009045 | 0.007432 |
| 0        | 6.33E-05 | 0.000133 | 7.54E-05 | 0.000192 | 7.24E-05 | 0        | 0        | 0        | 0        | 0.001484 | 5.59E-05 | 0        | 0.000939 | 0.001012 |
| 0        | 5.07E-05 | 0        | 0.000265 | 0.000204 | 6.34E-05 | 0        | 0        | 0        | 0        | 0.001759 | 0        | 0        | 0.000887 | 0.000961 |
| 0        | 0        | 0.00015  | 0        | 0.000123 | 0        | 0.005613 | 0        | 0.004331 | 0        | 0        | 7.59E-05 | 0        | 0        | 0.00032  |
| 0.000526 | 7.18E-05 | 0.002579 | 5.44E-05 | 0.006784 | 0.000337 | 0.136304 | 0        | 0.019041 | 0        | 0.000398 | 0.000797 | 0        | 0.001997 | 0.018808 |
| 0.357229 | 5.91E-05 | 0.004341 | 0.000298 | 0.001707 | 0.000226 | 0.037886 | 0.001203 | 0.043415 | 0.006781 | 0        | 0.005632 | 0.013621 | 0.007786 | 0.001531 |
| 0.000754 | 0        | 0        | 0        | 0        | 0        | 0.005371 | 0        | 0.002463 | 0.002342 | 0        | 0.000108 | 0.000331 | 0        | 0.000197 |
| 0.012757 | 0.000912 | 0.020633 | 0.011172 | 0.002217 | 7.24E-05 | 0.009677 | 0.006132 | 0.017071 | 0.004655 | 0.066434 | 0.000493 | 0.03076  | 0.000946 | 0.000759 |
| 0.016279 | 0.000553 | 0.042902 | 0.039754 | 0.265372 | 0.01076  | 0.363768 | 0.004693 | 0.051382 | 0.612134 | 0.447422 | 0.040087 | 0.021283 | 0.001848 | 0.007974 |
| 0.015491 | 0.003586 | 0.027344 | 0.043384 | 0.060994 | 0.045698 | 0.044661 | 0.007184 | 0        | 0.112532 | 0.060099 | 0.022167 | 0.000943 | 0.004843 | 0.015559 |
| 0        | 0        | 7.08E-05 | 6.84E-05 | 0.000279 | 6.79E-05 | 0        | 0.001213 | 0        | 0.001666 | 0.001812 | 5.59E-05 | 0        | 0        | 0        |

| CP12     | CP11     | CP10     | CP16     | CP08     | CP06     | CP05     | CP04     | CP03     | CP02     | CP36     | CP07     | CP17     | CP09     | CP19     |
|----------|----------|----------|----------|----------|----------|----------|----------|----------|----------|----------|----------|----------|----------|----------|
| 0.010721 | 0.002244 | 0.012676 | 0.006455 | 0.006634 | 0.000148 | 0.001474 | 0.00252  | 0.002241 | 0        | 0        | 0.012275 | 0        | 0.002203 | 0.002398 |
| 0        | 0        | 0        | 0        | 0.000604 | 0        | 0        | 0        | 0        | 0        | 0        | 0        | 0        | 0.00036  | 0        |
| 0        | 0        | 0        | 0        | 0        | 0        | 0        | 0        | 0        | 0        | 0.001751 | 0        | 0        | 0.001956 | 0.000169 |
| 0.0019   | 0.000648 | 0.00096  | 0.00057  | 0.002037 | 0        | 0        | 0.000366 | 0.001098 | 0        | 0.001459 | 0.004241 | 0        | 0.00113  | 0.000116 |
| 0        | 0        | 0.002301 | 0.003232 | 0.003407 | 5.76E-05 | 0        | 0.001034 | 0        | 0        | 0.003434 | 0.000478 | 0        | 0.004153 | 0        |
| 0        | 0.001276 | 0.000388 | 0.001037 | 0        | 0        | 0        | 0.001088 | 0        | 0        | 0        | 0        | 0        | 0.001147 | 0        |
| 0        | 0.000581 | 0.003873 | 0.001068 | 0.000739 | 0        | 0        | 0.000823 | 0.009423 | 0        | 0.005633 | 0.000374 | 0        | 0.001152 | 0        |
| 0.000681 | 0.007924 | 0.004605 | 0.00239  | 0.02466  | 0        | 0.006038 | 0.000466 | 0        | 0.000391 | 0.063584 | 0.064253 | 0.009227 | 0.021064 | 0.001143 |
| 0        | 0        | 0        | 0.000295 | 0.001316 | 0        | 0        | 9.39E-05 | 0        | 0        | 0.011604 | 0        | 0.000408 | 0.001135 | 0        |
| 0        | 0.000584 | 0.002248 | 0        | 0        | 0        | 0        | 0.001617 | 0        | 0        | 0        | 0        | 0        | 0        | 0        |
| 0        | 0.000443 | 0.001397 | 0        | 0        | 0        | 4.34E-05 | 0.000641 | 0        | 0        | 0        | 0        | 0        | 0.000377 | 0        |
| 0        | 0.000437 | 0.001214 | 0.003412 | 0        | 0        | 0.000133 | 0.004142 | 0        | 0        | 0        | 0        | 0        | 0.000332 | 0        |
| 0        | 0.089689 | 0.075662 | 0.143879 | 0.006498 | 0.000173 | 0.012448 | 0.526317 | 0.003362 | 0.003737 | 0.007182 | 0.001538 | 0.00129  | 0.020913 | 0.000462 |
| 0        | 0.009022 | 0.004732 | 0.012989 | 0.001424 | 0        | 0.000972 | 0.043315 | 0        | 0.000165 | 0        | 0        | 0        | 0.001765 | 0.000136 |
| 0        | 0.000813 | 0.000411 | 0.001567 | 0.001307 | 0        | 0        | 0        | 0        | 0        | 0        | 0.00054  | 0.002143 | 0.00077  | 0        |
| 0.039411 | 0.115785 | 0.060704 | 0.195278 | 0.17854  | 0.0008   | 0.003437 | 0        | 0.007251 | 0.005128 | 0.023005 | 0.051728 | 0.599574 | 0.238178 | 0.006661 |
| 0        | 0.001475 | 0        | 0.000499 | 0.01224  | 0.000156 | 0.000155 | 0        | 0        | 0        | 0        | 0        | 0        | 0.020317 | 0        |
| 0        | 0        | 0.000123 | 0.000259 | 0.000721 | 3.29E-05 | 0        | 0        | 0        | 0        | 0        | 0.000457 | 0.001694 | 0.004013 | 0.000314 |
| 0.006642 | 0.004575 | 0.054911 | 0.008164 | 0.004489 | 0.000191 | 0.021255 | 0.046127 | 0.460191 | 0.005779 | 0.020963 | 0.055699 | 0.00506  | 0.016928 | 0.000516 |
| 0        | 0        | 0        | 0.00029  | 0        | 0        | 0.000187 | 0        | 0        | 0.000191 | 0        | 0        | 0        | 0.002597 | 0        |
| 0        | 0        | 0        | 0        | 0        | 0        | 0.000814 | 0.000334 | 0        | 0        | 0        | 0.001569 | 0.000463 | 0.001124 | 0        |
| 0        | 0        | 0        | 0        | 0        | 0        | 4.34E-05 | 0        | 0        | 0        | 0        | 0        | 0        | 0.000719 | 0        |
| 0.009896 | 0.64687  | 0.001763 | 0.431198 | 0.06027  | 0.000422 | 0.271853 | 0.097962 | 0.004872 | 0.0006   | 0.010212 | 0.005311 | 0.002533 | 0.089142 | 0.433862 |
| 0        | 0.001659 | 0        | 0.000494 | 0        | 0        | 0.001702 | 0.002018 | 0        | 0        | 0        | 0        | 0        | 0.00122  | 0.001964 |
| 0.001113 | 0.048773 | 0.012344 | 0.051436 | 0.057584 | 0        | 0.001919 | 0.003716 | 0        | 0        | 0        | 0.000478 | 0.00044  | 0.006047 | 0.00624  |
| 0        | 0.0017   | 0.002088 | 0.014455 | 0        | 4.32E-05 | 0.006774 | 0.004736 | 0        | 0        | 0        | 0        | 0        | 0.001872 | 0.005749 |
| 0        | 0.00826  | 0.002473 | 0.031412 | 0.008184 | 0.000271 | 0.004045 | 0.001743 | 0        | 0        | 0        | 0        | 0        | 0        | 0        |
| 0        | 0.001589 | 0.002536 | 0.008577 | 0        | 0.000119 | 0.003358 | 0.000931 | 0        | 0.0002   | 0        | 0        | 0        | 0.000669 | 0.004379 |
| 0        | 0        | 0        | 0        | 0        | 0        | 0        | 0        | 0        | 0        | 0        | 0        | 0        | 0        | 0        |
| 0        | 0        | 0        | 0        | 0        | 0        | 0.00013  | 0.00011  | 0        | 0        | 0        | 0        | 0        | 0        | 0        |
| 0        | 0        | 0.000683 | 0.000235 | 0        | 0        | 0.000106 | 0.000254 | 0        | 0        | 0        | 0        | 0        | 0.000393 | 0        |
| 0        | 0.000215 | 0.000456 | 0        | 0        | 0        | 0        | 0.000341 | 0        | 0.000313 | 0        | 0.000582 | 0        | 0.000326 | 0        |
| 0.00049  | 0.000568 | 0.000859 | 0.001557 | 0        | 0        | 0.000988 | 0.000496 | 0        | 0        | 0        | 0.000509 | 0        | 0.000427 | 0.00026  |
| 0.001824 | 0.000403 | 0.002775 | 0.005698 | 0        | 0.012138 | 0.04215  | 0.002603 | 0        | 0.000495 | 0        | 0.001673 | 0.000442 | 0.001068 | 0.002687 |
| 0.010654 | 0.001784 | 0.017644 | 0.024682 | 0.00365  | 0.06484  | 0.196972 | 0.01504  | 0.002493 | 0.002112 | 0        | 0.008065 | 0.001267 | 0.000809 | 0.013301 |
| 0        | 0        | 0.000161 | 0        | 0        | 0        | 5.43E-05 | 0        | 0        | 0        | 0        | 0.000967 | 0        | 0        | 0        |
| 0        | 0        | 0.000105 | 0        | 0        | 0.000337 | 5.43E-05 | 0        | 0        | 0        | 0        | 0        | 0        | 0        | 0        |
| 0.004358 | 0        | 0.000646 | 0.000272 | 0        | 0.000701 | 0.000614 | 0.0002   | 0        | 0        | 0        | 0        | 0        | 0        | 0.000503 |
| 0.003244 | 0        | 0.001132 | 0.000504 | 0        | 0.000598 | 0.000231 | 0.000931 | 0        | 0        | 0        | 0        | 0.000411 | 0.00036  | 0.000227 |
| 0        | 0.000433 | 0.001923 | 0        | 0.000766 | 0        | 0        | 0.000249 | 0.006885 | 0        | 0.003636 | 0.001164 | 0        | 0.000393 | 0        |
| 0.004156 | 0.001569 | 0.002644 | 0.000253 | 0.006598 | 0        | 0.000133 | 0.00126  | 0.051074 | 0.005041 | 0.078599 | 0.000956 | 0.001729 | 0.001371 | 0        |
| 0        | 0.002096 | 0.000967 | 0.000528 | 0.00192  | 0        | 0        | 0.000859 | 0.02628  | 0.000591 | 0.067041 | 0        | 0.00087  | 0.001461 | 0.000161 |
| 0        | 0.000218 | 0.00012  | 0.00181  | 0        | 0        | 4.89E-05 | 0        | 0        | 0        | 0        | 0.002557 | 0        | 0.000635 | 0.000239 |
| 0.0012   | 0        | 0.000486 | 0.000235 | 0.005426 | 0        | 0        | 0        | 0        | 0.00153  | 0.026776 | 0.000946 | 0.00214  | 0.001804 | 0.000116 |
| 0        | 0        | 0        | 0        | 0        | 0        | 0        | 0.000106 | 0.001349 | 0        | 0        | 0        | 0        | 0.003892 | 0.000393 |
| 0.010491 | 0.000427 | 0.0031   | 0.002396 | 0.004047 | 0        | 6.24E-05 | 0        | 0        | 0        | 0.007811 | 0        | 0.005465 | 0.005131 | 0.000491 |
| 0.006853 | 0.000964 | 0.001046 | 0.001288 | 0.003281 | 0        | 0        | 0        | 0        | 0        | 0.003793 | 0.004646 | 0.013021 | 0.0053   | 0        |
| 0        | 0.000621 | 0.000146 | 0.003132 | 0        | 0        | 0.001518 | 0.000978 | 0        | 0.00199  | 0        | 0        | 0        | 0.000393 | 0.000396 |
| 0        | 0        | 0        | 0.000308 | 0        | 0        | 0        | 0.000139 | 0        | 0        | 0        | 0        | 0        | 0.000343 | 0        |
| 0.009128 | 0.001206 | 0.001569 | 0.000256 | 0.017323 | 8.23E-05 | 0.000548 | 0.001173 | 0        | 0.002173 | 0.003299 | 0.022169 | 0.020857 | 0.018794 | 0.004234 |
| 0.001766 | 0.0004   | 0.000411 | 0        | 0.001325 | 0.111168 | 0.003228 | 0.000254 | 0.267286 | 0.011611 | 0        | 0.008346 | 0.070289 | 0.001169 | 0.000739 |
| 0.001881 | 0.00606  | 0.000388 | 0.002328 | 0.12557  | 0.001061 | 3.26E-05 | 0        | 0.001967 | 0.026116 | 0        | 0.025454 | 0.00083  | 0.214197 | 0.068794 |
| 0        | 0.002375 | 0.00025  | 0.001079 | 0.028626 | 0.000276 | 0.001257 | 0.002337 | 0.107363 | 0.001208 | 0.003591 | 0.000488 | 0.052428 | 0.055393 | 0.004007 |
| 0        | 0.000625 | 0        | 0        | 0.002587 | 0        | 5.70E-05 | 0.001514 | 0.001487 | 0.001825 | 0        | 0.000551 | 0.003435 | 0        | 0.000458 |
| 0.004761 | 0.004793 | 0.028942 | 0.006204 | 0.013736 | 0.000224 | 0.002471 | 0.00155  | 0.031289 | 0.001895 | 0        | 0.011111 | 0.071753 | 0.010425 | 0.003578 |
| 0.001833 | 0.001196 | 0.005927 | 0.00104  | 0.006021 | 0        | 4.89E-05 | 0        | 0.005123 | 0.000113 | 0        | 0.004209 | 0.008157 | 0.008908 | 0.001201 |
| 0        | 0        | 0        | 0        | 0.002731 | 0        | 0.000168 | 0        | 0        | 0.000704 | 0.001863 | 0        | 0.000431 | 0        | 0.001205 |
| 0        | 0        | 0        | 0        | 0.00119  | 0        | 0.000171 | 0        | 0        | 0.001816 | 0.001481 | 0.004978 | 0.001264 | 0        | 0.000157 |
| 0        | 0        | 0        | 0        | 0.000586 | 0        | 0.000119 | 0.00026  | 0        | 0.011081 | 0        | 0        | 0        | 0        | 0.010622 |
| 0.006949 | 0.000225 | 0.002099 | 0.000515 | 0.013429 | 0        | 0.001208 | 0.000117 | 0        | 0.005319 | 0.03434  | 0.016536 | 0.005945 | 0.000388 | 0.00274  |
| 0.074301 | 0.003604 | 0.009965 | 0.00082  | 0.036737 | 8.02E-05 | 0.004393 | 0.003556 | 0        | 0.027246 | 0.055729 | 0.100391 | 0.033658 | 0.009093 | 0.005674 |
| 0.002505 | 0.000155 | 0.001561 | 0        | 0.005705 | 0.000243 | 0.001062 | 0.000374 | 0        | 0.007518 | 0.003703 | 0.026555 | 0.000885 | 0.005648 | 0.002348 |

|          |          |          |          |          |          |          |          |          |          |          |          |          |          |          |
|----------|----------|----------|----------|----------|----------|----------|----------|----------|----------|----------|----------|----------|----------|----------|
| 0.154477 | 0.001233 | 0.034339 | 0        | 0.03178  | 0.004473 | 0.00534  | 0.01667  | 0        | 0.03306  | 0.043138 | 0.068618 | 0.005089 | 0.01414  | 0.030476 |
| 0.045304 | 0.000846 | 0.004564 | 0.00053  | 0.002064 | 0.000557 | 0.018714 | 0.003963 | 0.001258 | 0.017156 | 0.006486 | 0.135895 | 0.006003 | 0.008576 | 0.008439 |
| 0.047762 | 0.002472 | 0.017278 | 0        | 0.040505 | 0.022344 | 0.003825 | 0.002386 | 0.001075 | 0.003511 | 0.008304 | 0.010695 | 0.005549 | 0.026123 | 0.006958 |
| 0.033172 | 0.00082  | 0.007787 | 0        | 0.012735 | 0.002861 | 0.001773 | 0.000711 | 0        | 0.010698 | 0.00312  | 0.098302 | 0.002565 | 0.027061 | 0.006322 |
| 0        | 0        | 0        | 0        | 0        | 0        | 5.97E-05 | 0        | 0        | 0        | 0        | 0        | 0        | 0        | 0        |
| 0        | 0        | 0.000138 | 0        | 0        | 0        | 0.003872 | 0.000101 | 0        | 0        | 0        | 0        | 0        | 0        | 0        |
| 0        | 0.000225 | 0.000385 | 0        | 0.008734 | 0.000103 | 0.004089 | 0        | 0.001235 | 0.049242 | 0.028504 | 0.019186 | 0        | 0.001517 | 0.004824 |
| 0.017805 | 0.001938 | 0.018458 | 0.005606 | 0.014565 | 4.94E-05 | 0.037716 | 0        | 0.002127 | 0.138106 | 0.066704 | 0.080945 | 0.000419 | 0.012128 | 0.005637 |
| 0        | 0.000225 | 0.001303 | 0        | 0.001433 | 0        | 0        | 0        | 0        | 0.003024 | 0        | 0.001455 | 0        | 0.000792 | 0.000388 |
| 0.003753 | 0.001354 | 0.085567 | 0        | 0.020856 | 0.000175 | 0.004393 | 0.002594 | 0.001189 | 0.008925 | 0.005207 | 0.051167 | 0.000466 | 0.004895 | 0.00754  |
| 0.013294 | 0.003383 | 0.005591 | 0        | 0.114223 | 7.40E-05 | 0.000871 | 0        | 0        | 0.09652  | 0        | 0.011152 | 0        | 0.010504 | 0.008357 |
| 0.063119 | 0.001011 | 0.022622 | 0.000509 | 0.004597 | 3.29E-05 | 0.001233 | 0        | 0.002081 | 0.009099 | 0        | 0.033353 | 0.001298 | 0.008807 | 0.007597 |
| 0        | 0        | 0.00474  | 0        | 0        | 0        | 0.000103 | 0.000614 | 0        | 0.000209 | 0        | 0.001653 | 0        | 0.000354 | 0.000549 |
| 0.000653 | 0.000638 | 0.008445 | 0        | 0.002208 | 0        | 9.50E-05 | 0.000805 | 0        | 0.000148 | 0        | 0.003731 | 0        | 0.002254 | 0        |
| 0        | 0.000175 | 0        | 0        | 0        | 0        | 0        | 0        | 0        | 0.000165 | 0        | 0        | 0        | 0.000377 | 0.001655 |
| 0.008082 | 0.000212 | 0.000807 | 0.001055 | 0.001884 | 0        | 0.000961 | 0.000262 | 0        | 0.00319  | 0        | 0        | 0        | 0.000927 | 0.039085 |
| 0.011595 | 0.001162 | 0.002842 | 0.001831 | 0.014015 | 0.528301 | 0.002522 | 0.015722 | 0        | 0.066485 | 0.112221 | 0.021608 | 0.027988 | 0.001888 | 0.006797 |
| 0.024812 | 0        | 0.000624 | 0        | 0.001875 | 0.017557 | 0.000717 | 0.0012   | 0        | 0.000817 | 0.028325 | 0        | 0.002594 | 0        | 0        |
| 0.09178  | 0.000427 | 0.049749 | 0.00052  | 0.003236 | 0.090444 | 9.50E-05 | 0.023136 | 0        | 0        | 0.001751 | 0        | 0.002134 | 0        | 0.008155 |
| 0.263937 | 0.005818 | 0.38246  | 0.011382 | 0.064164 | 0.1386   | 0.014191 | 0.150141 | 0        | 0.012176 | 0.189317 | 0.002463 | 0.005503 | 0.078986 | 0.240972 |
| 0.003695 | 0.003779 | 0.018185 | 0.00447  | 0.00922  | 0.000237 | 0.304438 | 0.007001 | 0        | 0.420244 | 0.061632 | 0.017981 | 0.017937 | 0.014764 | 0.027736 |
| 0        | 0        | 0.000702 | 0        | 0        | 3.08E-05 | 0.000513 | 0        | 0        | 0.000339 | 0.004803 | 0        | 0.000454 | 0        | 0.000136 |

| CP34     | CP18     | CP33     | CP32     | CP31     | CP30     | CP28     | CP27     | CP29     | CP26     | CP25     | CP24     | CP23     | CP22     | CP21     |
|----------|----------|----------|----------|----------|----------|----------|----------|----------|----------|----------|----------|----------|----------|----------|
| 0.000927 | 0.004728 | 0.002484 | 0.031423 | 0        | 0.008365 | 0.053877 | 0        | 0.011001 | 0.0174   | 0.034055 | 0.007144 | 0.00566  | 0.000762 | 0.004347 |
| 0        | 0        | 0        | 0        | 0        | 0        | 0        | 0        | 0        | 0        | 0        | 0        | 0        | 0        | 0        |
| 0        | 0        | 0        | 0        | 0        | 0        | 0        | 0        | 0        | 0        | 0        | 0        | 0        | 0        | 0        |
| 0.000947 | 0.004368 | 0        | 0.004567 | 0.00228  | 0.003487 | 0        | 0        | 0.00261  | 0.000681 | 0.000338 | 0.016742 | 0        | 0        | 0        |
| 0.000826 | 0.00156  | 0        | 0.016349 | 0        | 0.007137 | 0.000141 | 0        | 0.010953 | 0.000132 | 0.002114 | 0.033767 | 0        | 0        | 0.000414 |
| 0.000856 | 0        | 0        | 0.000405 | 0.004529 | 0        | 0        | 0.001255 | 0.006434 | 0.000269 | 0        | 0.003621 | 0        | 0        | 0        |
| 0        | 0.003528 | 0        | 0.001442 | 0        | 0.001801 | 0        | 0.004248 | 0.004026 | 0        | 0        | 0.010421 | 0.000296 | 0        | 0        |
| 0.001733 | 0.031631 | 0.021832 | 0.001892 | 0.030674 | 0.03256  | 0.022053 | 0.031582 | 0.026674 | 0        | 0.043109 | 0.04193  | 0.002817 | 0        | 0.008353 |
| 0.000998 | 0        | 0.000798 | 0        | 0        | 0        | 0        | 0        | 0        | 0        | 0.000259 | 0.004885 | 8.14E-05 | 0        | 0.000536 |
| 0.000826 | 0        | 0.003607 | 0        | 0        | 0        | 0        | 0        | 0.000854 | 0.001524 | 0.000252 | 0        | 0.002256 | 0        | 0.002661 |
| 0        | 0        | 0.001554 | 0.000791 | 0        | 0.002243 | 0        | 0        | 0.001798 | 0.000886 | 0.000212 | 0        | 0.000926 | 0        | 0.00297  |
| 0.001713 | 0        | 0.000852 | 0.000187 | 0        | 0        | 0        | 0        | 0.002082 | 0.003167 | 0        | 0        | 0.001463 | 0        | 0.00235  |
| 0.222869 | 0.000696 | 0.118853 | 0.019601 | 0.025519 | 0.008741 | 0.035124 | 0.001541 | 0.106308 | 0.820023 | 0.026117 | 0.013612 | 0.186209 | 0.023015 | 0.225633 |
| 0.016868 | 0        | 0.013395 | 0.000623 | 0.002425 | 0.001391 | 0.007562 | 0        | 0.009565 | 0.10663  | 0.005242 | 0.001927 | 0.010111 | 0        | 0.032983 |
| 0.002519 | 0        | 0        | 0        | 0.002297 | 0.001211 | 0.00056  | 0        | 0.000923 | 0        | 0        | 0        | 0.00022  | 0.001423 | 0.000539 |
| 0.32585  | 0        | 0.016278 | 0.001014 | 0.052386 | 0.029106 | 0.055344 | 0.062428 | 0.194313 | 0        | 0.005525 | 0.016607 | 0.019134 | 0.043439 | 0.134416 |
| 0        | 0        | 0.004815 | 0        | 0        | 0.001277 | 0.005694 | 0.00432  | 0.000847 | 0        | 0.001446 | 0        | 0.002765 | 0.002134 | 0.002997 |
| 0        | 0        | 0.001119 | 0        | 0        | 0        | 0.005794 | 0        | 0.000423 | 0        | 0.000259 | 0        | 0.000383 | 0.002439 | 0.000909 |
| 0.013029 | 0.001632 | 0.042302 | 0.0006   | 0.011756 | 0.006941 | 0.03711  | 0.004284 | 0.002985 | 0.001618 | 0.051809 | 0        | 0.008365 | 0.001626 | 0.039589 |
| 0.003658 | 0        | 0.014995 | 0        | 0        | 0        | 0.000451 | 0        | 0        | 0        | 0        | 0        | 0.002431 | 0        | 0.006417 |
| 0.001612 | 0        | 0.007296 | 0        | 0        | 0        | 0.001238 | 0        | 0.000465 | 0        | 0        | 0        | 0.003003 | 0        | 0.021033 |
| 0        | 0        | 0.000374 | 0        | 0        | 0.001211 | 0        | 0        | 0        | 0        | 0        | 0        | 0        | 0        | 0.018476 |
| 0.004293 | 0.00228  | 0.038146 | 0.001519 | 0.016301 | 0.036046 | 0.213794 | 0.007295 | 0.002527 | 0.000373 | 0.001957 | 0.006665 | 0.030505 | 0.004318 | 0.042245 |
| 0        | 0        | 0.002292 | 0        | 0        | 0        | 0.001043 | 0        | 0        | 0        | 0        | 0        | 0.00187  | 0.001372 | 0.000741 |
| 0.218436 | 0        | 0.003522 | 0.002293 | 0.424937 | 0.095256 | 6.48E-05 | 0.018372 | 0.062018 | 0        | 0.008897 | 0.068123 | 0.000329 | 0        | 0.009364 |
| 0        | 0        | 0.00144  | 0        | 0        | 0.001228 | 0        | 0        | 0.00084  | 0        | 0.000542 | 0.000921 | 0.000989 | 0.001372 | 0.001443 |
| 0.017543 | 0        | 0.000902 | 0.001069 | 0.021359 | 0.014438 | 0        | 0        | 0.030568 | 0        | 0.000511 | 0.001007 | 0.000362 | 0        | 0.002391 |
| 0.008172 | 0        | 0.002146 | 0.001419 | 0        | 0        | 0        | 0        | 0.005629 | 0.000269 | 0.001548 | 0.000884 | 0.000742 | 0.001626 | 0.001972 |
| 0        | 0        | 0        | 0        | 0        | 0        | 0        | 0        | 0        | 0        | 0.00092  | 0        | 0.000112 | 0        | 0        |
| 0        | 0        | 0        | 0        | 0        | 0        | 0        | 0        | 0.000534 | 0        | 0.00055  | 0        | 0        | 0        | 0        |
| 0        | 0        | 0        | 0.001078 | 0        | 0        | 0        | 0        | 0.002117 | 0        | 0        | 0.00297  | 0        | 0        | 0        |
| 0        | 0        | 0        | 0.000646 | 0        | 0        | 0        | 0        | 0.001666 | 0        | 0        | 0        | 0.000106 | 0        | 0        |
| 0.000907 | 0        | 0.000178 | 0.000973 | 0        | 0        | 0        | 0        | 0.003519 | 0.001036 | 0        | 0.001056 | 9.05E-05 | 0        | 0.000832 |
| 0.003335 | 0.000744 | 0.003974 | 0.001719 | 0.002505 | 0        | 0        | 0.001362 | 0.01661  | 0.001186 | 0.002554 | 0.001866 | 0.005244 | 0.001524 | 0.003827 |
| 0.008918 | 0.000648 | 0.0164   | 0.009553 | 0.009507 | 0.0092   | 0.00013  | 0.004212 | 0.038134 | 0.003827 | 0.01373  | 0.004971 | 0.030394 | 0.004115 | 0.014016 |
| 0        | 0        | 0        | 0.000232 | 0        | 0        | 0        | 0        | 0.00127  | 0        | 0        | 0        | 0        | 0        | 0        |
| 0        | 0        | 0        | 0        | 0        | 0        | 0        | 0        | 0        | 0        | 0        | 0        | 5.43E-05 | 0        | 0        |
| 0        | 0        | 0.000809 | 0.001342 | 0        | 0        | 0        | 0        | 0.000576 | 0        | 0        | 0        | 0.000917 | 0        | 0.000918 |
| 0        | 0        | 0.000802 | 0.000623 | 0        | 0.001228 | 0        | 0        | 0.000375 | 0.000152 | 0        | 0        | 0.001061 | 0        | 0.001313 |
| 0        | 0.003672 | 0        | 0.001542 | 0.006954 | 0.001048 | 0        | 0.011668 | 0.001194 | 0        | 0        | 0.002013 | 0        | 0        | 0        |
| 0.002469 | 0.075118 | 0.000585 | 0.006004 | 0.007002 | 0.008038 | 0        | 0.021078 | 0.003408 | 0.00349  | 0.000904 | 0.004603 | 0.000163 | 0        | 0.000761 |
| 0.001713 | 0.026183 | 0        | 0.003621 | 0.002168 | 0.002488 | 0        | 0.01468  | 0.000958 | 0.000526 | 0.000228 | 0.000982 | 0        | 0        | 0.000543 |
| 0        | 0        | 0.000884 | 0        | 0        | 0.001162 | 0        | 0        | 0        | 0        | 0        | 0        | 0        | 0        | 0        |
| 0        | 0        | 0        | 0        | 0.021295 | 0.009429 | 0        | 0        | 0.000854 | 0        | 0        | 0        | 0        | 0        | 0        |
| 0        | 0        | 0.000185 | 0.000396 | 0        | 0        | 0        | 0        | 0        | 0        | 0        | 0.000982 | 0        | 0        | 0.000339 |
| 0.000796 | 0        | 0.000984 | 0.000223 | 0        | 0        | 6.78E-05 | 0        | 0.002929 | 0        | 0        | 0.001792 | 0.000697 | 0        | 0.004897 |
| 0.000867 | 0        | 0.000399 | 0.0002   | 0        | 0        | 0        | 0.002868 | 0.012022 | 0        | 0        | 0.001007 | 7.54E-05 | 0        | 0.00322  |
| 0.031932 | 0        | 0.000235 | 0        | 0        | 0.002586 | 0.000978 | 0        | 0        | 0        | 0        | 0        | 0.000335 | 0        | 0.003015 |
| 0.002449 | 0        | 0        | 0.000191 | 0        | 0        | 6.19E-05 | 0        | 0.000555 | 0        | 0        | 0        | 0        | 0        | 0        |
| 0        | 0.000768 | 0.000581 | 0.004963 | 0.011852 | 0.044379 | 0        | 0.031976 | 0.025106 | 0        | 0.001187 | 0.005143 | 0.000232 | 0        | 0.000557 |
| 0        | 0        | 0.000652 | 0.00056  | 0.0097   | 0.003421 | 0        | 0.012815 | 0.003283 | 0.00081  | 0        | 0        | 0        | 0.031753 | 0.000195 |
| 0.011175 | 0        | 0.000663 | 0        | 0.156806 | 0.374722 | 0        | 0.438844 | 0.052862 | 0        | 0.0029   | 0        | 0.000624 | 0        | 0.001763 |
| 0.003456 | 0        | 0.008889 | 0.019446 | 0        | 0        | 0.005912 | 0.011471 | 0.006899 | 0        | 0.005604 | 0.020412 | 0.000476 | 0.001473 | 0.004936 |
| 0        | 0        | 0        | 0        | 0        | 0        | 0.000663 | 0.015432 | 0.006649 | 0        | 0        | 0        | 8.75E-05 | 0.002286 | 0        |
| 0.011457 | 0.000984 | 0.000567 | 0.001578 | 0.021118 | 0.015355 | 0.029713 | 0.044074 | 0.024772 | 0.000157 | 0.008504 | 0.000884 | 0.001604 | 0.0126   | 0.000689 |
| 0.000856 | 0        | 0.000777 | 0.000164 | 0.00257  | 0.006008 | 0.001335 | 0.016275 | 0.006365 | 0        | 0        | 0.000921 | 7.84E-05 | 0        | 0.000779 |
| 0.000856 | 0        | 0        | 0.000641 | 0        | 0        | 0        | 0        | 0        | 0        | 0        | 0.003363 | 0        | 0        | 0        |
| 0        | 0.014136 | 0        | 0.001933 | 0.002216 | 0.00113  | 0        | 0.002904 | 0.001166 | 0        | 0.001313 | 0.002651 | 8.44E-05 | 0        | 0        |
| 0        | 0.082821 | 0        | 0        | 0        | 0.001391 | 0        | 0        | 0.000514 | 0.000178 | 0        | 0        | 0        | 0        | 0        |
| 0        | 0.00156  | 0.000175 | 0.003061 | 0        | 0.003585 | 4.42E-05 | 0.035668 | 0.003873 | 0.004097 | 0.0141   | 0.004001 | 0.000793 | 0        | 0.000177 |
| 0.006862 | 0.041111 | 0.002705 | 0.089917 | 0.016541 | 0.036537 | 5.01E-05 | 0.059561 | 0.076899 | 0        | 0.016206 | 0.096244 | 0.001577 | 0        | 0.006453 |
| 0        | 0.026159 | 0.001251 | 0.036714 | 0        | 0.006139 | 0        | 0.040131 | 0.006837 | 0        | 0.00279  | 0.137093 | 0.003601 | 0.001524 | 0.000379 |

|          |          |          |          |          |          |          |          |          |          |          |          |          |          |          |
|----------|----------|----------|----------|----------|----------|----------|----------|----------|----------|----------|----------|----------|----------|----------|
| 0.00268  | 0.041999 | 0.022021 | 0.164413 | 0.004882 | 0.020119 | 0.001606 | 0.008926 | 0.043756 | 0        | 0.023358 | 0.081061 | 0.037932 | 0.001626 | 0.016281 |
| 0        | 0.079461 | 0.009221 | 0.065512 | 0.002297 | 0.005566 | 0.002921 | 0.003854 | 0.02632  | 0        | 0.003325 | 0.006702 | 0.014342 | 0        | 0.005763 |
| 0.002721 | 0.022655 | 0.008159 | 0.084377 | 0.009459 | 0.01565  | 0.002614 | 0.02253  | 0.031762 | 0        | 0.000621 | 0.01921  | 0.004885 | 0.001118 | 0.008212 |
| 0.001844 | 0.087693 | 0.002983 | 0.136902 | 0.007163 | 0.003438 | 0.004677 | 0.005933 | 0.018456 | 0        | 0.006217 | 0.023763 | 0.008039 | 0        | 0.0018   |
| 0        | 0        | 0        | 0        | 0        | 0        | 0        | 0        | 0        | 0        | 0        | 0        | 0        | 0        | 0        |
| 0        | 0        | 0        | 0.000528 | 0        | 0        | 0.001058 | 0        | 0.000382 | 0        | 0.000621 | 0        | 0.000678 | 0        | 0.000368 |
| 0.000927 | 0        | 0.000449 | 0.000237 | 0.011772 | 0.008823 | 0.004197 | 0        | 0.000541 | 0        | 0.037607 | 0.009525 | 0.000923 | 0        | 0.000173 |
| 0.012132 | 0        | 0.011524 | 0.000791 | 0.026017 | 0.022361 | 0.030214 | 0.003997 | 0.007323 | 0        | 0.095209 | 0.030392 | 0.00895  | 0        | 0.019299 |
| 0        | 0        | 0        | 0        | 0        | 0        | 0.002626 | 0        | 0.000396 | 0        | 0.001839 | 0.000921 | 0.000226 | 0        | 0.000168 |
| 0.000897 | 0        | 0.005325 | 0.004872 | 0.009266 | 0.009806 | 0.029645 | 0.00432  | 0.001728 | 0.003327 | 0.052697 | 0.007733 | 0.006182 | 0.001473 | 0.002552 |
| 0.00524  | 0.006    | 0.018143 | 0.002315 | 0.007355 | 0.001162 | 0.161259 | 0.007922 | 0.029457 | 0        | 0.057421 | 0.069068 | 0.044464 | 0.001727 | 0.014045 |
| 0.001743 | 0        | 0.081809 | 0.000787 | 0.002313 | 0.002325 | 0.012133 | 0.002617 | 0.002214 | 0        | 0.021888 | 0.0095   | 0.052712 | 0.313824 | 0.045508 |
| 0.000766 | 0        | 0.001276 | 0        | 0        | 0        | 9.73E-05 | 0        | 0        | 0.000427 | 0.001501 | 0        | 0.001092 | 0.001524 | 0.000352 |
| 0.002549 | 0        | 0.002007 | 0.000196 | 0.002393 | 0.001146 | 0.000312 | 0        | 0.000451 | 0.00098  | 0        | 0.004664 | 0.001043 | 0.00696  | 0.000877 |
| 0        | 0        | 0.000809 | 0        | 0        | 0.002144 | 0        | 0        | 0        | 0        | 0.003529 | 0        | 0.000356 | 0.026317 | 0.001025 |
| 0        | 0.000816 | 0.006173 | 0        | 0.002313 | 0.102459 | 0.005549 | 0        | 0.001347 | 0        | 0.189718 | 0.084681 | 0.001689 | 0        | 0.01163  |
| 0.001733 | 0.42781  | 0.008579 | 0.105101 | 0.002313 | 0.000982 | 0.017211 | 0.034001 | 0.003922 | 0        | 0.006633 | 0.019259 | 0.017445 | 0        | 0.028484 |
| 0        | 0        | 0.004085 | 0.00484  | 0.002393 | 0        | 0.000124 | 0        | 0.00134  | 0        | 0.001666 | 0.003596 | 0.00133  | 0        | 0.004883 |
| 0.015165 | 0        | 0.128327 | 0.001992 | 0.012013 | 0.005533 | 0.031461 | 0        | 0.001978 | 0        | 0.00459  | 0.014189 | 0.013651 | 0.001778 | 0.071225 |
| 0.017059 | 0.005352 | 0.207962 | 0.153423 | 0.012173 | 0.007808 | 0.034856 | 0.004212 | 0.021718 | 0.026276 | 0.051322 | 0.086535 | 0.288554 | 0.00503  | 0.08197  |
| 0.002821 | 0.003888 | 0.136294 | 0.001196 | 0.021183 | 0.009118 | 0.178594 | 0.001344 | 0.020615 | 0.000559 | 0.183171 | 0.00599  | 0.164823 | 0.499822 | 0.069538 |
| 0        | 0        | 0.004156 | 0        | 0        | 0.001277 | 3.83E-05 | 0        | 0.000507 | 0        | 0.001383 | 0.002001 | 0.001363 | 0        | 0.003456 |

| CP20     | HC090    | HC083    | HC085    | HC086    | HC087    | HC088    | HC089    | HC084    | HC091    | HC099    | HC093    | HC094    | HC095    | HC096    |
|----------|----------|----------|----------|----------|----------|----------|----------|----------|----------|----------|----------|----------|----------|----------|
| 0.004283 | 0.011572 | 0.05512  | 0.000771 | 0.059164 | 0.049923 | 0.002226 | 0.008481 | 0.002261 | 0.052062 | 0.012527 | 0.019039 | 0.026073 | 0.00837  | 0.020698 |
| 0        | 0        | 0        | 0.000116 | 0.000378 | 0        | 0        | 0.00119  | 0.00103  | 0.000691 | 0        | 0        | 0        | 0.000865 | 0.000788 |
| 0.001463 | 0.007592 | 7.34E-05 | 0.002472 | 0.005502 | 0        | 0.000365 | 0.004916 | 0.009568 | 0.009459 | 0.000181 | 0.000989 | 6.85E-05 | 0.01392  | 0.002252 |
| 0        | 0        | 0.007219 | 7.46E-05 | 0.001091 | 0.001053 | 0        | 0.000117 | 4.77E-05 | 0.001    | 0.000613 | 0.004961 | 0.000132 | 0.000254 | 3.38E-05 |
| 0.00105  | 0        | 0.012208 | 3.49E-05 | 0.001443 | 0.002291 | 0        | 0.000121 | 5.15E-05 | 0.001167 | 0.003633 | 0.002798 | 0.000455 | 7.90E-05 | 9.33E-05 |
| 0        | 0        | 0.001847 | 0.000824 | 0        | 0.000811 | 0        | 0.000117 | 8.01E-05 | 0.000111 | 0.000118 | 0.002453 | 0        | 0.000104 | 0        |
| 0.000579 | 0        | 0.00533  | 0.003624 | 0.000194 | 0.003179 | 3.20E-05 | 0.000267 | 0.000644 | 0.000767 | 0.001526 | 0.005929 | 0.000132 | 0.000337 | 0.000332 |
| 0.004779 | 0.01915  | 0.028098 | 0.01085  | 0.031298 | 0.004489 | 0.00016  | 0.009749 | 0.005116 | 0.017639 | 0.042951 | 0.017832 | 0.099863 | 0.012031 | 0.051391 |
| 0        | 0.00052  | 0.001574 | 0.000674 | 0.000966 | 8.90E-05 | 0        | 5.73E-05 | 4.58E-05 | 0.000781 | 0        | 0.000496 | 0.000612 | 0.000245 | 0.001535 |
| 0.001497 | 0        | 0.000871 | 0.00355  | 0.00027  | 0.003556 | 0.001158 | 0.000327 | 0.001258 | 0.001257 | 0        | 0.001843 | 0.000125 | 0.000179 | 0.00172  |
| 0.00153  | 0        | 0.000168 | 0.005131 | 0.000105 | 0.001887 | 0.000508 | 0.000117 | 0.000898 | 0.002167 | 0.000409 | 0.002996 | 8.07E-05 | 0.00015  | 0.00143  |
| 0.005184 | 0        | 0.000467 | 0.012565 | 0.000239 | 0.01346  | 0.010767 | 0.001158 | 0.001867 | 0.000416 | 0.000511 | 0.004691 | 0        | 7.90E-05 | 0.000596 |
| 0.18566  | 0.01145  | 0.030863 | 0.51625  | 0.017518 | 0.496975 | 0.26645  | 0.158876 | 0.231856 | 0.064093 | 0.005835 | 0.167324 | 0.009983 | 0.012705 | 0.179221 |
| 0.013386 | 0.003046 | 0.002104 | 0.051218 | 0.001595 | 0.027834 | 0.035759 | 0.012851 | 0.025482 | 0.006227 | 0.000425 | 0.018324 | 0.001938 | 0.001668 | 0.015245 |
| 0.001563 | 0.000628 | 0.002035 | 4.28E-05 | 0.000496 | 0.000356 | 0.002222 | 0.001913 | 0.000204 | 6.62E-05 | 0.000716 | 0.00013  | 0.003472 | 0.000225 | 0.002526 |
| 0.42068  | 0.106845 | 0.292898 | 0.017321 | 0.058655 | 0.046996 | 0.308499 | 0.178494 | 0.035273 | 0.013585 | 0.095118 | 0.031321 | 0.358993 | 0.016054 | 0.224861 |
| 0.003018 | 0.034855 | 0.003347 | 9.52E-05 | 0.00042  | 0.000161 | 0.00297  | 0.004006 | 0.000644 | 0.000278 | 0.001172 | 0.000475 | 0.042408 | 0.007043 | 0.015354 |
| 0        | 0.011725 | 0.001033 | 0.000205 | 0.000346 | 0.000168 | 0.000675 | 0.00032  | 0        | 0        | 0.000204 | 0        | 0.006778 | 0.002213 | 0.003757 |
| 0.008243 | 0.006    | 0.023209 | 0.052489 | 0.034208 | 0.029127 | 0.002382 | 0.026504 | 0.008404 | 0.028664 | 0.088065 | 0.008579 | 0.035036 | 0.016641 | 0.04539  |
| 0        | 0        | 0.000178 | 0.000365 | 0        | 0        | 0.00141  | 0.003003 | 0.002345 | 0        | 0.000629 | 0        | 0.000465 | 0.00483  | 5.56E-05 |
| 0.000703 | 0.001362 | 0        | 0.015509 | 0.001241 | 0.000141 | 0.001435 | 0.012141 | 0.015909 | 0.000172 | 0.00022  | 0        | 0.000751 | 0.003603 | 0.024082 |
| 0.00258  | 0.00274  | 0.046575 | 0.002436 | 0.002041 | 0.002279 | 0.006989 | 0.019531 | 0.011894 | 0.000127 | 0        | 0        | 0.000122 | 0.000449 | 0.002607 |
| 0.052089 | 0.006307 | 0.005136 | 0.000357 | 0.001349 | 0.052906 | 0.001974 | 0.026423 | 0.08767  | 0.00063  | 0.007219 | 0.125109 | 0.000976 | 0.000582 | 0.007892 |
| 0        | 0        | 0        | 0        | 0        | 0.000633 | 0        | 0        | 0.001106 | 0        | 0        | 0.001582 | 0        | 9.15E-05 | 0.000121 |
| 0.10808  | 0.002679 | 0.014007 | 0.000305 | 0.000373 | 0.001482 | 0.000377 | 0.001245 | 0.000755 | 0.000844 | 0.010632 | 0.003665 | 0.001226 | 0        | 0.000626 |
| 0.001538 | 0        | 0.00213  | 0.000581 | 0.000113 | 0.005779 | 0.000211 | 0.000284 | 0.000816 | 0.000193 | 0.001628 | 0.005861 | 9.54E-05 | 0        | 0.000125 |
| 0.063003 | 0        | 0.007098 | 0.000522 | 5.25E-05 | 0.002451 | 0.001068 | 0.002799 | 0.000681 | 0.000617 | 0.012826 | 0.003745 | 0.000874 | 0        | 6.75E-05 |
| 0.00797  | 0        | 0.012013 | 0.001068 | 0.000283 | 0.002902 | 0.001779 | 0.00608  | 0.001148 | 0.000543 | 0.032901 | 0.007595 | 0.000886 | 9.15E-05 | 0.000258 |
| 0        | 0        | 6.82E-05 | 0        | 3.94E-05 | 0.000101 | 0.000152 | 6.36E-05 | 5.53E-05 | 0        | 0.001156 | 0        | 0        | 0        | 4.96E-05 |
| 0        | 0        | 7.87E-05 | 0.0002   | 0.000207 | 8.90E-05 | 0        | 6.79E-05 | 0        | 9.53E-05 | 0        | 0        | 9.05E-05 | 0        | 9.13E-05 |
| 0        | 0        | 0.002072 | 0.000419 | 0.000538 | 0.000731 | 0        | 6.15E-05 | 5.34E-05 | 0        | 0.008257 | 0.000669 | 0.000127 | 0        | 0        |
| 0        | 0        | 0.00127  | 0.000438 | 0.000727 | 0.00031  | 0        | 0        | 0        | 0.000606 | 0.004073 | 0.001649 | 0.00013  | 0        | 0        |
| 0.001554 | 0        | 6.82E-05 | 0.002041 | 0.000832 | 0.000613 | 0.000477 | 0.000218 | 0.000193 | 0.00018  | 0.009885 | 0.000475 | 0        | 0.000175 | 5.96E-05 |
| 0.00549  | 0.003215 | 0.007261 | 0.018657 | 0.026108 | 0.019787 | 0.041113 | 0.044409 | 0.017667 | 0.004031 | 0.048794 | 0.013107 | 0.006247 | 0.004476 | 0.002419 |
| 0.017189 | 0.009536 | 0.022348 | 0.068271 | 0.110683 | 0.073448 | 0.169652 | 0.157555 | 0.065318 | 0.012026 | 0.243961 | 0.031957 | 0.043675 | 0.018875 | 0.011847 |
| 0        | 0        | 0.00043  | 0.000152 | 5.25E-05 | 0        | 0.000898 | 0.000115 | 8.96E-05 | 0        | 0        | 0        | 0        | 0        | 4.96E-05 |
| 0        | 0        | 4.20E-05 | 0.000159 | 0.000454 | 0.000157 | 4.22E-05 | 5.30E-05 | 4.77E-05 | 0.000466 | 0.000417 | 0.000547 | 0        | 0        | 0        |
| 0.00057  | 0        | 0.000719 | 0.000889 | 0.002209 | 0.000643 | 0.000178 | 0        | 0.00025  | 0.001781 | 0.000417 | 0.000332 | 5.63E-05 | 0        | 0.000179 |
| 0        | 0        | 0.000734 | 0.000603 | 0.001283 | 0.000582 | 0.000427 | 0        | 0.000427 | 0.002715 | 0.000771 | 0.00032  | 0        | 5.41E-05 | 0.000314 |
| 0        | 0.000551 | 0.004958 | 3.65E-05 | 6.56E-05 | 0        | 0        | 7.42E-05 | 0        | 0        | 0.003004 | 0.000846 | 0.000345 | 0        | 0        |
| 0        | 0.001714 | 0.012654 | 7.93E-05 | 0        | 0        | 0        | 0.00025  | 4.39E-05 | 7.67E-05 | 0.000212 | 0.000173 | 0        | 8.74E-05 | 0        |
| 0        | 0        | 0.007318 | 3.17E-05 | 6.03E-05 | 9.33E-05 | 0        | 0        | 9.53E-05 | 0        | 0.000299 | 0.000307 | 0        | 0        | 0        |
| 0        | 0        | 0.00021  | 0        | 0        | 0.000373 | 0        | 0.000197 | 0        | 0        | 0.003476 | 0.000698 | 0.000113 | 0        | 3.18E-05 |
| 0        | 0.001301 | 0        | 0        | 0.000215 | 4.02E-05 | 0        | 0        | 0        | 8.20E-05 | 0.000849 | 0.000164 | 0        | 0        | 0        |
| 0        | 0        | 0        | 9.36E-05 | 0.000344 | 4.60E-05 | 0.000118 | 5.30E-05 | 0.000153 | 0        | 0        | 0.000168 | 0        | 0        | 4.17E-05 |
| 0.007879 | 0.000735 | 0.003809 | 0.00034  | 0.000514 | 0.000593 | 0.001046 | 0.000456 | 0.00024  | 0.000442 | 0.000267 | 0.00175  | 0.000756 | 0.000158 | 0.002363 |
| 0.003605 | 0        | 0.001642 | 0.000313 | 0.000399 | 0.000329 | 0.00081  | 0.000153 | 4.39E-05 | 0.000257 | 0.001014 | 0.001203 | 0.000952 | 7.90E-05 | 0.001225 |
| 0.002067 | 0        | 0        | 0.000438 | 0        | 0.000101 | 0.000931 | 0.025024 | 0.013036 | 6.35E-05 | 0        | 0        | 0.001493 | 0.000453 | 0.000161 |
| 0.001075 | 0        | 0        | 7.30E-05 | 0        | 0        | 0        | 5.09E-05 | 4.39E-05 | 0        | 0.000212 | 0        | 6.36E-05 | 8.32E-05 | 0        |
| 0.000463 | 0.003184 | 0.003095 | 0.000135 | 0.000278 | 0        | 0.000393 | 0.000223 | 0.000187 | 0        | 0.000236 | 0.000417 | 0.000663 | 0.000179 | 0.000149 |
| 0        | 0.003551 | 0.004024 | 0        | 0        | 0        | 8.32E-05 | 0.00014  | 0.000143 | 0        | 0        | 0        | 0.000208 | 0.000786 | 0.000216 |
| 0        | 0.266731 | 0.043054 | 5.39E-05 | 0.000265 | 0        | 0.001731 | 0.002165 | 0.000358 | 7.15E-05 | 0        | 0        | 0.007707 | 0.002026 | 0.000892 |
| 0.004051 | 0.005602 | 0.00224  | 0.005057 | 0.006365 | 0.000717 | 0.037169 | 0.047499 | 0.021772 | 0.000405 | 0.001439 | 0.00037  | 0.003188 | 0.000578 | 0.001501 |
| 0.00057  | 0.005006 | 0.00095  | 0        | 0        | 0.000106 | 0        | 9.12E-05 | 0.000233 | 0        | 0        | 0        | 0.000313 | 0.000158 | 5.36E-05 |
| 0.003324 | 0.021369 | 0.060513 | 0.000114 | 0.000611 | 0.00128  | 0.004751 | 0.005408 | 0.004118 | 0.000257 | 0.000252 | 0.00337  | 0.000208 | 0.00094  | 0.004998 |
| 0        | 0.001883 | 0.018251 | 6.82E-05 | 0.000113 | 0        | 0.000516 | 0.001215 | 0.0011   | 0        | 0.000692 | 0.000892 | 0.000575 | 0.00015  | 0.000441 |
| 0        | 0.00075  | 0        | 0        | 0        | 0        | 0        | 0        | 0        | 0        | 0.000283 | 0        | 0        | 0        | 0        |
| 0        | 0        | 0        | 0        | 0        | 0        | 0        | 0        | 0        | 0        | 0        | 0        | 0        | 0        | 0        |
| 0        | 0.005067 | 0.008514 | 0        | 0.008147 | 0.000623 | 0        | 0        | 0        | 0.001162 | 0.014516 | 0.046856 | 0.00079  | 0.023176 | 0.000449 |
| 0        | 0.003138 | 0.0016   | 0.000797 | 0.002262 | 0.001002 | 4.86E-05 | 4.88E-05 | 4.58E-05 | 0.001572 | 0.009845 | 0.003471 | 0.00081  | 0.002234 | 0.000951 |
| 0.001521 | 0.008633 | 0.000866 | 0.002085 | 0.001679 | 0.000836 | 0.000434 | 0.001022 | 0.000225 | 0.003848 | 0.017001 | 0.009231 | 0.000394 | 0.00545  | 0.001881 |
| 0.000537 | 0        | 0.002466 | 0.000747 | 0.020202 | 0.000421 | 0.000216 | 6.36E-05 | 0.00089  | 0.00749  | 0.002949 | 0.007115 | 0.003107 | 0.004293 | 0.001372 |

|          |          |          |          |          |          |          |          |          |          |          |          |          |          |          |
|----------|----------|----------|----------|----------|----------|----------|----------|----------|----------|----------|----------|----------|----------|----------|
| 0.006259 | 0.001837 | 0.016226 | 0.016393 | 0.016611 | 0.004348 | 0.000737 | 0.005238 | 0.005928 | 0.049985 | 0.018039 | 0.017971 | 0.027052 | 0.023746 | 0.018029 |
| 0.001133 | 0        | 0.003447 | 0.006011 | 0.00849  | 0.00087  | 0.001929 | 0.007545 | 0.006738 | 0.026068 | 0.010899 | 0.008159 | 0.006677 | 0.004522 | 0.011839 |
| 0.004151 | 0.001271 | 0.004879 | 0.003499 | 0.02486  | 0.001802 | 0.000414 | 0.008601 | 0.004067 | 0.035686 | 0.016128 | 0.01747  | 0.005084 | 0.014124 | 0.004025 |
| 0        | 0        | 0.00266  | 0.001046 | 0.011723 | 0.000182 | 0.000237 | 0.001983 | 0.002073 | 0.010306 | 0.010176 | 0.005533 | 0.008067 | 0.007983 | 0.003735 |
| 0        | 0        | 0        | 0        | 0        | 0        | 0.013523 | 0.044676 | 0.109388 | 0        | 0        | 0        | 0        | 0        | 0        |
| 0        | 0.002648 | 0.00063  | 8.41E-05 | 0.000491 | 0.000214 | 0.002152 | 0.005147 | 0.004889 | 0.000423 | 0        | 0        | 0.001424 | 0.000362 | 0.001759 |
| 0.000496 | 0.013777 | 0.000661 | 0.000219 | 0.004103 | 0.000582 | 0.000201 | 0.000992 | 0.000963 | 0.002088 | 0.004246 | 0.001586 | 0.008985 | 0.001901 | 0.003271 |
| 0.005928 | 0.068256 | 0.007072 | 0.005055 | 0.039878 | 0.008    | 0.023495 | 0.022017 | 0.016363 | 0.041211 | 0.013046 | 0.008327 | 0.057323 | 0.012181 | 0.036374 |
| 0        | 0.001362 | 0.00692  | 0.000532 | 0.001028 | 0.00053  | 0.00054  | 0.001338 | 0.000576 | 0        | 0.002398 | 0        | 0.000827 | 0.006336 | 0.001483 |
| 0.001596 | 0.026941 | 0.014852 | 0.014822 | 0.016952 | 0.009479 | 0.001559 | 0.004551 | 0.015966 | 0.007408 | 0.010003 | 0.006652 | 0.003394 | 0.00996  | 0.024475 |
| 0.003225 | 0.143155 | 0.077799 | 0.002021 | 0.007758 | 0.007252 | 0.001974 | 0.018142 | 0.0062   | 0.002366 | 0.021806 | 0.002828 | 0.014786 | 0.110037 | 0.028772 |
| 0.00048  | 0.009062 | 0.003074 | 0.019047 | 0.023692 | 0.00321  | 0.00636  | 0.028027 | 0.048688 | 0.019738 | 0.013612 | 0.00515  | 0.001916 | 0.003723 | 0.060704 |
| 0        | 0        | 0.000997 | 0.0013   | 0.001005 | 0.000343 | 0.000102 | 6.79E-05 | 0.000753 | 0.000582 | 0.001305 | 0.000606 | 0.000147 | 0.000354 | 0.001749 |
| 0        | 0        | 0.001369 | 0.003193 | 0.000743 | 0.000735 | 6.52E-05 | 7.21E-05 | 0.001596 | 0.000672 | 0.001431 | 0.002487 | 0.00021  | 0.000582 | 0.002335 |
| 0        | 0.000628 | 0.000446 | 0        | 0.005287 | 0.00079  | 0        | 0        | 9.15E-05 | 0.002911 | 0.001282 | 0.006753 | 5.14E-05 | 0.001265 | 0.000643 |
| 0.001034 | 0.120102 | 0.002125 | 0.000109 | 0.167279 | 0.011771 | 0        | 0.000878 | 0.001356 | 0.073991 | 0.048959 | 0.238857 | 0.009254 | 0.050788 | 0.026417 |
| 0.00377  | 0        | 0.009506 | 0.048264 | 0.141706 | 0.027107 | 0.00023  | 0.003187 | 0.001506 | 0.285106 | 0.096054 | 0.042985 | 0.10506  | 0.333973 | 0.016018 |
| 0        | 0        | 0.001117 | 0.002831 | 0.005001 | 0.000497 | 0        | 6.15E-05 | 0.000153 | 0.006545 | 0.000582 | 0.002882 | 0.000859 | 0.002679 | 0.001565 |
| 0.011947 | 0.000674 | 0.007444 | 0.003423 | 0.026111 | 0.004717 | 0.000569 | 0.007155 | 0.003392 | 0.040791 | 0.009869 | 0.003753 | 0.046663 | 0.054515 | 0.036976 |
| 0.018223 | 0.027967 | 0.031151 | 0.058796 | 0.052214 | 0.041401 | 0.020189 | 0.042861 | 0.112418 | 0.103497 | 0.01594  | 0.054442 | 0.026991 | 0.083121 | 0.053666 |
| 0.002985 | 0.013884 | 0.039912 | 0.011421 | 0.040418 | 0.022012 | 0.015085 | 0.029632 | 0.082865 | 0.048675 | 0.009664 | 0.009732 | 0.011603 | 0.110304 | 0.031106 |
| 0        | 0        | 0.00086  | 0.000198 | 0.000659 | 0.000207 | 3.58E-05 | 6.79E-05 | 0.000151 | 0.00077  | 0.000228 | 0        | 7.34E-05 | 0.00032  | 0.000264 |

| HC097    | HC098    | HC100    | HC082    | HC101    | HC092    | HC081    | HC063    | HC079    | HC102    | HC059    | HC060    | HC061    | HC062    | HC064    |
|----------|----------|----------|----------|----------|----------|----------|----------|----------|----------|----------|----------|----------|----------|----------|
| 0.035328 | 0.133746 | 0.104182 | 0.018405 | 0.02329  | 0.004284 | 0.047942 | 0.007877 | 0.007182 | 0.029181 | 0.019165 | 0.108991 | 0.047277 | 0.02673  | 0.007911 |
| 4.18E-05 | 0        | 0.000609 | 0        | 0        | 0        | 0.003519 | 0.002395 | 0.000341 | 0        | 0.000586 | 0        | 0.012392 | 0        | 5.06E-05 |
| 0.000492 | 0.001519 | 0.0043   | 0.000371 | 0.000911 | 0.001617 | 0.020011 | 0.017713 | 0.004337 | 0.000561 | 0.005587 | 0.000322 | 0.107814 | 0.002163 | 0.000343 |
| 0.001119 | 0.005553 | 0.000676 | 0.000271 | 0        | 5.89E-05 | 0.002049 | 0.000531 | 0.000228 | 0.000982 | 0.000943 | 0.000202 | 0.003098 | 0.007428 | 0        |
| 0.002785 | 0.018033 | 0.002275 | 0.000651 | 0        | 0.0002   | 0.004268 | 0        | 0.000941 | 0.002391 | 0.001967 | 0        | 0.005801 | 0.008751 | 3.79E-05 |
| 0.000609 | 0.000861 | 0.000155 | 0.000237 | 9.22E-05 | 0.000102 | 9.26E-05 | 0        | 0.000721 | 0.001092 | 0.00049  | 0        | 0.001985 | 0        | 3.79E-05 |
| 0.002345 | 0.005527 | 0.000592 | 0.000995 | 0        | 0.00112  | 0.000387 | 0        | 0.002531 | 0.002111 | 0.002579 | 0.000335 | 0.005817 | 0.000562 | 6.18E-05 |
| 0.008614 | 0.096196 | 0.000473 | 0.008773 | 0.02568  | 0.003151 | 0.036266 | 0.01406  | 0.032022 | 0.007225 | 0.014357 | 0.020736 | 0.039708 | 0.043363 | 0.001127 |
| 0.000255 | 0.00265  | 0        | 0.000955 | 0        | 5.89E-05 | 0.000846 | 0.000561 | 0.002483 | 0        | 0.000859 | 0        | 0        | 0.005564 | 0.000112 |
| 0.000514 | 0.001509 | 0.000215 | 0.00482  | 0        | 0.002772 | 0        | 0        | 0.003065 | 0.000337 | 0.002302 | 0        | 0.000245 | 0        | 0.003403 |
| 0.000396 | 0.000697 | 0.000284 | 0.002755 | 0        | 0.00094  | 0.000471 | 0        | 0.001709 | 0.000428 | 0.002918 | 8.58E-05 | 0.001058 | 0        | 0.002685 |
| 0.007451 | 0.004508 | 0.008083 | 0.006967 | 0.000125 | 0.006907 | 0.000383 | 0        | 0.001682 | 0.014917 | 0.0172   | 0.00012  | 0.004017 | 0        | 0.01556  |
| 0.120233 | 0.12721  | 0.280463 | 0.177258 | 0.16995  | 0.243926 | 0.013496 | 0.005206 | 0.077406 | 0.113895 | 0.31817  | 0.022414 | 0.145076 | 0.000861 | 4.335078 |
| 0.013915 | 0.00988  | 0.019246 | 0.026021 | 0.00554  | 0.009482 | 0.002605 | 0.000586 | 0.007647 | 0.010885 | 0.031643 | 0.003566 | 0.008808 | 0        | 0.042978 |
| 0.000846 | 0.000296 | 0.00379  | 0.000248 | 0.002038 | 0.002283 | 0.000165 | 0.000541 | 0.000119 | 0.000569 | 0.000247 | 0.000463 | 0.000552 | 0.000213 | 0.00088  |
| 0.135214 | 0.039907 | 0.450809 | 0.07749  | 0.227356 | 0.36411  | 0.073711 | 0.038387 | 0.071173 | 0.184194 | 0.022043 | 0.167276 | 0.140135 | 0.060047 | 0.060903 |
| 0.000908 | 0.007059 | 0.003082 | 0.000863 | 0.001247 | 0.000976 | 0.005862 | 0.000556 | 0.001012 | 0.001547 | 0.000335 | 0.002867 | 0.001346 | 0        | 0.000572 |
| 0.001059 | 0.000759 | 0.000914 | 0.000452 | 0.000108 | 0.000817 | 0.000765 | 0.000281 | 0.000223 | 0.000228 | 0.000122 | 0.00033  | 0.001306 | 0.00047  | 9.56E-05 |
| 0.032231 | 0.09472  | 0.009449 | 0.017303 | 0.022905 | 0.014695 | 0.027794 | 0.00939  | 0.028618 | 0.016297 | 0.013111 | 0.024456 | 0.039957 | 0.013881 | 0.004065 |
| 0.000644 | 0.005218 | 0.001139 | 0        | 0.004201 | 0.001973 | 0.002657 | 0        | 0.000359 | 0.000786 | 0        | 0        | 0.003145 | 0.000555 | 4.36E-05 |
| 0.007858 | 0.001239 | 0.006673 | 0.00267  | 0.002781 | 0.006064 | 0.001711 | 0        | 0.001151 | 0.02142  | 0.001324 | 0.000232 | 0.001563 | 0        | 0.003155 |
| 0.001253 | 0.00021  | 0.00164  | 0.000722 | 0.021419 | 0.004043 | 0.033552 | 0        | 0.001666 | 0.00775  | 0.001842 | 0.000107 | 0.000489 | 0        | 0.001411 |
| 0.137544 | 0.030198 | 0.00445  | 0.173439 | 0.008869 | 0        | 0.003495 | 0.372963 | 0.043839 | 0.10393  | 0.110363 | 0.011887 | 0.019266 | 0.005557 | 0.020933 |
| 0.000349 | 0.000605 | 0        | 0.000856 | 0        | 0        | 0        | 0.005657 | 0.000584 | 0.002993 | 0.002789 | 0        | 0.00062  | 0.000228 | 0.000131 |
| 0.003482 | 0.005066 | 0.000466 | 0.005341 | 0        | 0.01125  | 8.05E-05 | 0.033852 | 0.001472 | 0.002041 | 0.004738 | 7.72E-05 | 0.003043 | 0.000263 | 0.000424 |
| 0.011865 | 0.005632 | 0.000664 | 0.013963 | 9.22E-05 | 0.000848 | 7.65E-05 | 0.005928 | 0.000594 | 0.025037 | 0.009809 | 0        | 0.001231 | 0.000562 | 0.003243 |
| 0.025556 | 0.009206 | 0.000277 | 0.018025 | 0        | 0.011262 | 0.000475 | 0.001724 | 0.002483 | 0.009119 | 0.010765 | 9.01E-05 | 0.001551 | 0        | 0.00663  |
| 0.021648 | 0.012973 | 0.000617 | 0.018727 | 0        | 0.012444 | 0.000745 | 0.001864 | 0.001062 | 0.018675 | 0.014419 | 0        | 0.001993 | 0.000256 | 0.010129 |
| 0.001947 | 5.26E-05 | 0        | 0.000436 | 0.001458 | 0.000167 | 7.65E-05 | 0        | 0        | 9.84E-05 | 0.000114 | 9.44E-05 | 0.000154 | 0        | 7.45E-05 |
| 0.000108 | 0.000819 | 0        | 0        | 0        | 6.40E-05 | 0.000121 | 0        | 0.000114 | 0        | 0        | 0        | 0.000485 | 0        | 0        |
| 0.001851 | 0.00265  | 0        | 0.000429 | 0        | 0.000136 | 0.000725 | 0        | 0.000243 | 0.002785 | 0.000351 | 0.00012  | 0.000821 | 0.001978 | 6.18E-05 |
| 0.002791 | 0.000848 | 4.51E-05 | 0.000467 | 0        | 0.000179 | 0.000515 | 0.000581 | 0.000131 | 0.000875 | 0.000837 | 0        | 0.001176 | 0.001444 | 3.23E-05 |
| 0.002642 | 0.000796 | 0.000624 | 0.000814 | 0        | 0.001009 | 0.000274 | 0.000571 | 0.000238 | 0.004327 | 0.001644 | 0.000257 | 0.004033 | 0.002426 | 0.001442 |
| 0.072865 | 0.03319  | 0.009063 | 0.046895 | 0.009845 | 0.020457 | 0.02316  | 0.006183 | 0.004423 | 0.075646 | 0.032687 | 0.021023 | 0.02253  | 0.005734 | 0.04449  |
| 0.254236 | 0.145411 | 0.040265 | 0.115765 | 0.03951  | 0.064013 | 0.076055 | 0.018925 | 0.018781 | 0.277175 | 0.120086 | 0.085106 | 0.054211 | 0.030856 | 0.273125 |
| 0.000426 | 0        | 0.000177 | 0        | 0        | 0.000423 | 0        | 0        | 0.000106 | 0.000108 | 0.000343 | 0        | 0        | 0        | 4.50E-05 |
| 0        | 0        | 8.89E-05 | 8.50E-05 | 0        | 0.000225 | 0.000113 | 0        | 0.00023  | 0.000233 | 0.000134 | 0        | 0        | 0.000491 | 0.000516 |
| 0.001369 | 0.000861 | 4.01E-05 | 0.002694 | 0        | 0.000789 | 0.000536 | 0.000256 | 0.000749 | 0.0001   | 0.001957 | 8.15E-05 | 0        | 0.001508 | 0.002074 |
| 0.001233 | 0.000996 | 9.52E-05 | 0.007832 | 0        | 0.000579 | 0.000693 | 0.000546 | 0.000536 | 0.000195 | 0.001086 | 0.000223 | 0        | 0.000726 | 0.002317 |
| 6.15E-05 | 0.000148 | 5.14E-05 | 0        | 0        | 7.94E-05 | 0.000741 | 0.000225 | 0        | 0.000102 | 0        | 0        | 0.004617 | 0.002846 | 0        |
| 0.000229 | 0.000342 | 0        | 0        | 0        | 0.000297 | 8.05E-05 | 0        | 0.000154 | 0.000421 | 0.00056  | 0        | 0.003094 | 0.000235 | 0        |
| 0.000288 | 8.22E-05 | 0        | 8.05E-05 | 0        | 0.000133 | 0        | 0        | 0.000131 | 0.000571 | 0.000329 | 0        | 0.001239 | 0        | 0        |
| 6.81E-05 | 0        | 0        | 0.000391 | 0        | 6.40E-05 | 9.26E-05 | 0.000306 | 0.000121 | 0.000211 | 0.000622 | 0        | 0.000347 | 0.000918 | 0        |
| 0        | 0        | 0        | 0.000168 | 0        | 0        | 0        | 0.002059 | 0        | 0        | 0        | 0        | 0.00013  | 0.000313 | 0        |
| 0.000193 | 0        | 4.88E-05 | 0        | 0        | 0.000161 | 0        | 0        | 0.000134 | 0        | 0        | 0        | 9.47E-05 | 0        | 0        |
| 0.001059 | 0.001108 | 0.000407 | 0.002256 | 9.76E-05 | 0.004658 | 0.000668 | 0.000892 | 0.003045 | 0.000454 | 0.000363 | 8.15E-05 | 0.000197 | 0.00397  | 0.001171 |
| 0.000264 | 0.000161 | 0.000817 | 0.000606 | 0        | 0.002175 | 0.001095 | 0.000847 | 0.001694 | 0.000556 | 0.000602 | 0.000103 | 0.001732 | 0.001551 | 0.000285 |
| 0.002952 | 0.000115 | 0.001641 | 0.000501 | 0.002271 | 0.002708 | 0.000105 | 0        | 0.000703 | 0.004509 | 0.000369 | 0.00021  | 0.00133  | 0        | 0.000606 |
| 5.71E-05 | 0        | 0.000134 | 0        | 0        | 0        | 0        | 0        | 0        | 0.000344 | 0        | 0        | 0.000316 | 0        | 0        |
| 0        | 0        | 4.38E-05 | 0        | 0        | 0.000236 | 0        | 0.003082 | 0        | 0.000124 | 0.000355 | 0        | 0.000943 | 0.001081 | 0        |
| 0        | 0        | 0        | 0.000338 | 0.000401 | 7.94E-05 | 0.000419 | 0.002616 | 9.10E-05 | 0        | 0        | 0        | 0        | 0        | 0        |
| 0.000125 | 0.000201 | 0.000402 | 7.83E-05 | 0.000472 | 0.000315 | 0.000387 | 0.043613 | 0.00023  | 0.000122 | 0.000259 | 0.003137 | 0.000963 | 0.000235 | 0        |
| 0.016107 | 0.000125 | 0.009594 | 0.001075 | 0.009352 | 0.008265 | 0.00267  | 0.000792 | 0.000678 | 0.001114 | 0.000472 | 0.003489 | 0.007601 | 0        | 0.000235 |
| 0        | 0        | 7.89E-05 | 9.84E-05 | 9.22E-05 | 0.000136 | 0        | 0.000556 | 0        | 0        | 0        | 0        | 0.000556 | 0.000213 | 0        |
| 0.002325 | 0.001128 | 0.000601 | 0.000358 | 0.012659 | 0.006843 | 0.001969 | 0.01199  | 0.001312 | 0.001136 | 0.00058  | 0.004682 | 0.010647 | 0.008943 | 0.000684 |
| 0.000884 | 0        | 8.39E-05 | 8.05E-05 | 0.002342 | 0.001058 | 0.000109 | 0.003833 | 0.000126 | 0.000217 | 0        | 0.000296 | 0.001878 | 0.001039 | 7.31E-05 |
| 0        | 0        | 0        | 0        | 0        | 0        | 0.000105 | 0.000521 | 0        | 0        | 0        | 0        | 0        | 0        | 0        |
| 0        | 0        | 0        | 0        | 0        | 0        | 9.26E-05 | 0.000526 | 0        | 0        | 0        | 0        | 0        | 0        | 0        |
| 0        | 0        | 0        | 0.00017  | 0        | 0        | 0.002674 | 0.014551 | 0.000738 | 0        | 0.001206 | 0.011342 | 0.000489 | 0.048429 | 0        |
| 0.000264 | 0.001805 | 0.000296 | 0.001348 | 0        | 0.000612 | 0.006048 | 0.009781 | 0.003237 | 0.000691 | 0.002107 | 0.001738 | 0.015189 | 0.011696 | 0.000121 |
| 0.000466 | 0.000723 | 0.000378 | 0.000586 | 0        | 0.002759 | 0.004095 | 0.005717 | 0.007814 | 0.000724 | 0.002521 | 8.15E-05 | 0.016148 | 0.016869 | 0.000697 |
| 0.000374 | 0.00189  | 0        | 0.00091  | 0.000331 | 0.002201 | 0.001598 | 0.003117 | 0.008578 | 0.000756 | 0.00178  | 0.004459 | 0.00528  | 0.00466  | 0.00049  |

|          |          |          |          |          |          |          |          |          |          |          |          |          |          |          |
|----------|----------|----------|----------|----------|----------|----------|----------|----------|----------|----------|----------|----------|----------|----------|
| 0.001268 | 0.0094   | 0.000536 | 0.0084   | 0.006121 | 0.010689 | 0.033584 | 0.015859 | 0.057656 | 0.001828 | 0.006538 | 0.029572 | 0.006863 | 0.067987 | 0.006468 |
| 0.00091  | 0.001841 | 0.000819 | 0.002652 | 0.004055 | 0.003968 | 0.012188 | 0.005031 | 0.017841 | 0.001557 | 0.002725 | 0.007767 | 0.003765 | 0.013831 | 0.006701 |
| 0.000631 | 0.003199 | 0.000213 | 0.003756 | 0.013548 | 0.006277 | 0.017982 | 0.005582 | 0.024031 | 0.000742 | 0.007112 | 0.001708 | 0.001176 | 0.026829 | 0.00989  |
| 0.000204 | 0.002137 | 4.88E-05 | 0.001753 | 0.001334 | 0.002075 | 0.007731 | 0.004239 | 0.00747  | 0.000346 | 0.002629 | 0.008673 | 0.002447 | 0.005201 | 0.001321 |
| 0        | 0        | 0        | 0        | 0        | 0        | 9.26E-05 | 0        | 0.000114 | 0        | 0        | 0.000391 | 0        | 0        | 0        |
| 0.000771 | 7.56E-05 | 0.000635 | 0.00047  | 0.002223 | 0.000648 | 0.001103 | 0        | 0.000741 | 0.000441 | 0.00046  | 0.002759 | 0.000103 | 0.000768 | 6.60E-05 |
| 0.000301 | 0.002242 | 0.000273 | 0.000651 | 0.001073 | 0.000338 | 0.001957 | 0.012617 | 0.000334 | 0.0001   | 0.000251 | 0.002455 | 0.000841 | 0.001437 | 5.06E-05 |
| 0.004106 | 0.013611 | 0.009045 | 0.009786 | 0.013179 | 0.017831 | 0.022342 | 0.043883 | 0.009493 | 0.006667 | 0.012043 | 0.023697 | 0.019459 | 0.018185 | 0.0049   |
| 0.000356 | 0.00267  | 0.000235 | 0.000233 | 0.000683 | 0.000899 | 0.002923 | 0        | 0.001191 | 0.000111 | 0.000464 | 0.000498 | 0.013717 | 0.003059 | 0.000433 |
| 0.006827 | 0.004093 | 0.002431 | 0.003115 | 0.012024 | 0.013028 | 0.03414  | 0.010152 | 0.036288 | 0.00459  | 0.005501 | 0.02419  | 0.014392 | 0.028914 | 0.001522 |
| 0.003084 | 0.004876 | 0.000961 | 0.004599 | 0.007134 | 0.007304 | 0.100539 | 0.067659 | 0.014611 | 0.001312 | 0.006378 | 0.011771 | 0.110415 | 0.012002 | 0.000524 |
| 0.005732 | 0.022278 | 0.006047 | 0.015991 | 0.028136 | 0.003943 | 0.00403  | 0.001448 | 0.024534 | 0.01443  | 0.005021 | 0.011428 | 0.002411 | 0.010053 | 0.005989 |
| 0.000295 | 0.000247 | 0.000187 | 0.000414 | 0        | 0.000594 | 0.001232 | 0.001398 | 0.004805 | 0.000454 | 0.000955 | 0.00018  | 0.000375 | 0.001864 | 9.27E-05 |
| 0.000229 | 0.000845 | 0.000351 | 0.000179 | 0.000184 | 0.001104 | 0.00116  | 0.001999 | 0.0046   | 0.001283 | 0.000949 | 0.000305 | 0.00088  | 0.001843 | 3.51E-05 |
| 0        | 0.000148 | 0.000139 | 0.001205 | 0        | 0        | 0.001341 | 0.000301 | 0.003318 | 0        | 0.003644 | 0.000695 | 0.000588 | 0.005962 | 0        |
| 0.00042  | 0.007808 | 0.0032   | 0.006166 | 0.000233 | 0.0002   | 0.027013 | 0.014997 | 0.02568  | 0        | 0.04721  | 0.02828  | 0.014605 | 0.063725 | 0.000395 |
| 0.000846 | 0.004675 | 0.00065  | 0.007629 | 0.019175 | 0.025773 | 0.103648 | 0.010603 | 0.098959 | 0.001637 | 0.013723 | 0.058641 | 0.008571 | 0.086528 | 0.014611 |
| 3.74E-05 | 0.000625 | 0        | 0.001916 | 0.000146 | 0.001545 | 0.001828 | 0        | 0.007885 | 0.000104 | 0.000921 | 0.000335 | 0        | 0.006609 | 0.00149  |
| 0.009137 | 0.023175 | 0.000362 | 0.006497 | 0.016746 | 0.011009 | 0.066528 | 0.00214  | 0.070159 | 0.001465 | 0.002075 | 0.032992 | 0.000391 | 0.114168 | 0.019208 |
| 0.014885 | 0.076342 | 0.000862 | 0.117901 | 0.185265 | 0.025671 | 0.058222 | 0.131374 | 0.11028  | 0.00569  | 0.061788 | 0.114218 | 0.008169 | 0.128426 | 0.050347 |
| 0.010062 | 0.005283 | 0.002504 | 0.043277 | 0.093169 | 0.040128 | 0.091383 | 0.018224 | 0.124186 | 0.005054 | 0.03712  | 0.138271 | 0.035336 | 0.072526 | 0.024942 |
| 0.00016  | 0        | 0        | 0.000371 | 0.000136 | 0.000769 | 0.000395 | 0.000341 | 0.004838 | 0        | 0.000454 | 9.44E-05 | 0        | 0.004468 | 0.000475 |

| HC065    | HC066    | HC067    | HC080    | HC068    | HC070    | HC071     | HC072    | HC073    | HC074    | HC075    | HC076    | HC077    | HC078    | HC069    |
|----------|----------|----------|----------|----------|----------|-----------|----------|----------|----------|----------|----------|----------|----------|----------|
| 0.073103 | 0.04948  | 0.037016 | 0.001045 | 0.034765 | 0.006835 | 0.067667  | 0.041409 | 0.054517 | 0.015087 | 0.111563 | 0.022868 | 0.00713  | 0.013636 | 0.003446 |
| 0.002153 | 0.000569 | 0.000388 | 0.000257 | 0.000326 | 0        | 0         | 6.76E-05 | 0.000155 | 0        | 0.000679 | 0.001024 | 0        | 0.000151 | 0.000205 |
| 0.005406 | 0.002808 | 0.001976 | 0.001083 | 0.003514 | 0        | 4.00E-05  | 0.000615 | 0.002169 | 0.000314 | 0.004305 | 0.002981 | 0.000612 | 0.001937 | 0        |
| 0.013798 | 0.000498 | 0.001226 | 0        | 0.000729 | 0.000391 | 0.000573  | 0.000724 | 0.000123 | 0.000342 | 0.00446  | 0.000237 | 0.000342 | 0.001671 | 0        |
| 0.028522 | 0.00107  | 0.002596 | 0        | 0.003321 | 0.000324 | 0.000929  | 0.001764 | 0.000568 | 0.0004   | 0.005667 | 0.000361 | 0.001219 | 0.005204 | 0.000184 |
| 0.002727 | 0.000335 | 0.000737 | 0.000149 | 0.000808 | 0.000218 | 0.000208  | 0.000323 | 0.000157 | 0.000121 | 0.001713 | 0        | 0.000171 | 0.000681 | 0        |
| 0.00748  | 0.000251 | 0.001749 | 0.00252  | 0.010078 | 0.001106 | 0.00057   | 0.001696 | 0.000491 | 0.000852 | 0.007556 | 0.002198 | 0.001921 | 0.003367 | 0.00016  |
| 0.002225 | 0.039488 | 0.044655 | 0.034034 | 0.055292 | 0.010559 | 0.007361  | 0.016962 | 0.051217 | 0.023893 | 0.007033 | 0.03157  | 0.006229 | 0.002874 | 0.00735  |
| 0        | 0.00084  | 0.000214 | 0        | 0.000496 | 0        | 0         | 0.000379 | 0.000271 | 0.000532 | 0.000434 | 0.000207 | 7.24E-05 | 0.000134 | 0.001028 |
| 0.000889 | 0.001036 | 9.94E-05 | 0        | 0.002239 | 0        | 0.00037   | 0.002866 | 0.000713 | 0.000336 | 0.004664 | 0.000166 | 0        | 0.000161 | 0.001421 |
| 0.000847 | 0.000291 | 0.000252 | 0.000658 | 0.00114  | 7.94E-05 | 0.000387  | 0.00172  | 0.000389 | 0.000389 | 0.001526 | 0.000602 | 0.00023  | 5.35E-05 | 0.000344 |
| 0.000695 | 0.001097 | 0.000492 | 0.00014  | 0.001366 | 0.000574 | 0.001589  | 0.002939 | 0.001908 | 0.000375 | 0.007116 | 0.000621 | 0.000249 | 0        | 0        |
| 0.026139 | 0.094747 | 0.095524 | 0.04221  | 0.392132 | 0.057216 | 0.160736  | 0.397439 | 0.355104 | 0.071858 | 0.359321 | 0.070351 | 0.036712 | 0.012595 | 0.020165 |
| 0.001022 | 0.006507 | 0.008705 | 0.004452 | 0.028479 | 0.010359 | 0.021279  | 0.044433 | 0.018376 | 0.0089   | 0.024025 | 0.011137 | 0.002592 | 0.001522 | 0.002053 |
| 0        | 0.000102 | 0.00182  | 0.001507 | 0.001446 | 0.004546 | 0.000428  | 0.000688 | 0.000467 | 0.001403 | 0.000201 | 0.000444 | 0.000921 | 0.000229 | 0.00017  |
| 0.004849 | 0.046171 | 0.316969 | 0.218549 | 0.157126 | 0.486494 | 0.096575  | 0.119275 | 0.05511  | 0.255264 | 0.046776 | 0.171643 | 0.072987 | 0.021679 | 0.020394 |
| 0.000381 | 0.005206 | 0.004819 | 0.004368 | 0.001381 | 0.001506 | 0.000617  | 0.002425 | 0.003975 | 0.003697 | 0.001435 | 0.005311 | 0.00034  | 7.07E-05 | 0.004558 |
| 0        | 0.000224 | 0.001066 | 0.001596 | 0.000179 | 0.000636 | 0.00019   | 0.00021  | 0.000578 | 0.000518 | 0.000565 | 0.001114 | 0.000148 | 6.12E-05 | 0.000851 |
| 0.003301 | 0.030827 | 0.052011 | 0.011569 | 0.140066 | 0.019709 | 0.012858  | 0.049097 | 0.056021 | 0.056051 | 0.008061 | 0.018453 | 0.003905 | 0.002948 | 0.00833  |
| 0        | 0.000637 | 0.000551 | 0.000322 | 5.65E-05 | 0        | 0         | 0.005065 | 0.008692 | 0.000185 | 0.000529 | 8.28E-05 | 3.76E-05 | 0        | 0        |
| 0        | 0.000779 | 0.002007 | 0.004844 | 0.015873 | 0.003469 | 0.012836  | 0.021057 | 0.016963 | 0.004657 | 0.000957 | 0.000922 | 0.000676 | 0.000147 | 0        |
| 0        | 0.000508 | 0.000303 | 0.000224 | 0.00585  | 0.001936 | 0.000295  | 0.003858 | 0.003351 | 0.009562 | 0.029249 | 0.005006 | 0.001607 | 0.000598 | 0.00042  |
| 0.019754 | 0.010819 | 0.108698 | 0        | 0.010789 | 0.021248 | 0.057013  | 0.015076 | 0.000283 | 0.11615  | 0.107332 | 0.108262 | 0.809303 | 0.857211 | 0.092603 |
| 0.000254 | 0        | 0.000166 | 0        | 0        | 0        | 0         | 0.000152 | 0        | 0.001092 | 0.000397 | 0.000294 | 0.001758 | 0.001484 | 0.001907 |
| 0.001258 | 0.001304 | 0.004541 | 0.000103 | 0.001145 | 0.006729 | 0.000969  | 0.003762 | 0.00281  | 0.000888 | 0.003574 | 0.001231 | 0.005284 | 0.005397 | 0.002359 |
| 0.001578 | 0.0004   | 0.003613 | 0.000126 | 0.000253 | 0.001192 | 0.0001825 | 0.001274 | 0.000481 | 0.000976 | 0.007232 | 0.001234 | 0.008498 | 0.006741 | 0.001334 |
| 0.001899 | 0.004254 | 0.001079 | 0        | 0.000299 | 0.008518 | 0.003179  | 0.005255 | 0.001903 | 8.55E-05 | 0.004441 | 0.000937 | 0.004573 | 0.005369 | 0.000521 |
| 0.003229 | 0.007137 | 0.004334 | 0        | 0.001025 | 0.011748 | 0.006835  | 0.004867 | 0.001688 | 0.000824 | 0.011659 | 0.004174 | 0.003312 | 0.002464 | 0.001959 |
| 0        | 0.000227 | 0        | 0.000387 | 6.02E-05 | 9.12E-05 | 0         | 7.72E-05 | 0        | 0        | 0        | 0.000301 | 0        | 0        | 0        |
| 0        | 0.000203 | 0        | 0        | 5.11E-05 | 0        | 0         | 0        | 8.95E-05 | 0.000141 | 0        | 0        | 0        | 6.50E-05 | 0        |
| 0.001989 | 0.000139 | 0.000265 | 0.000238 | 0.000173 | 0.000341 | 0.000118  | 0        | 0.000157 | 0.000309 | 0.000615 | 0.000192 | 0.000274 | 0.000539 | 0        |
| 0.001082 | 0        | 0        | 0.000448 | 0        | 0.00048  | 0.000375  | 0.000123 | 0.000106 | 7.44E-05 | 0.000899 | 0.000132 | 5.79E-05 | 0.000543 | 0        |
| 0.001022 | 0.000254 | 0.000408 | 0.000266 | 0.000111 | 0.000415 | 0.000285  | 0.000287 | 0.000283 | 0.000301 | 0.001624 | 0.000275 | 3.91E-05 | 8.22E-05 | 0        |
| 0.009203 | 0.032605 | 0.01411  | 0.006911 | 0.002373 | 0.027915 | 0.067151  | 0.009369 | 0.012154 | 0.008745 | 0.021308 | 0.010422 | 0.002459 | 0.001235 | 0.004464 |
| 0.02204  | 0.104028 | 0.050236 | 0.025345 | 0.011684 | 0.087111 | 0.234291  | 0.031507 | 0.061836 | 0.044403 | 0.075406 | 0.038066 | 0.006976 | 0.002986 | 0.014416 |
| 0        | 0        | 0.00038  | 0.000373 | 5.11E-05 | 0.001033 | 4.67E-05  | 0        | 0        | 0        | 9.26E-05 | 0.000188 | 0        | 0        | 0        |
| 0.000387 | 8.81E-05 | 0.000255 | 0.000149 | 0        | 0        | 0.000103  | 4.58E-05 | 0        | 0        | 0.000189 | 0        | 3.33E-05 | 0        | 0        |
| 0.001415 | 0.000471 | 0.000173 | 0.000126 | 0        | 0.000127 | 0.00029   | 8.45E-05 | 0.000186 | 0.000149 | 0.001833 | 0.000139 | 0        | 0        | 0.001164 |
| 0.000623 | 0.000532 | 0.000268 | 0        | 6.93E-05 | 0.000441 | 0.000487  | 0.000241 | 5.56E-05 | 7.17E-05 | 0.001044 | 9.79E-05 | 0        | 0.000176 | 0.000684 |
| 0        | 0        | 0.00039  | 0.001885 | 0.000237 | 9.71E-05 | 0         | 0.000135 | 0.000324 | 0.000143 | 0.000336 | 0.00012  | 9.41E-05 | 0.000168 | 0        |
| 0.003066 | 0        | 0.00102  | 0.000121 | 9.67E-05 | 0.002439 | 0         | 0.000468 | 0.000878 | 0        | 6.75E-05 | 0.001027 | 0.000172 | 0.000434 | 0.000219 |
| 0        | 0        | 0.000377 | 0        | 6.02E-05 | 0.001448 | 0         | 0.000309 | 0.000665 | 0.000182 | 0        | 0.000109 | 0.000193 | 0.000143 | 0        |
| 0.000248 | 0.000247 | 0.000357 | 0.000401 | 0        | 0        | 0         | 7.96E-05 | 0        | 0        | 0.00012  | 0.000199 | 0        | 7.84E-05 | 0        |
| 0        | 0.000332 | 0.000293 | 0        | 0        | 0        | 0         | 0        | 0        | 0        | 8.10E-05 | 0        | 0        | 0        | 0        |
| 0        | 6.44E-05 | 0        | 0        | 0        | 0        | 0         | 7.48E-05 | 0        | 6.34E-05 | 0        | 0.000294 | 0        | 0        | 0.000156 |
| 0        | 0.000251 | 0.000461 | 0.000238 | 0.000626 | 0.000312 | 0.000358  | 0.00179  | 0.000377 | 0.001059 | 0.001028 | 0.000425 | 7.82E-05 | 0.000797 | 0.002637 |
| 0        | 0.000156 | 0.002578 | 0.001969 | 0.000164 | 0.001242 | 0.000282  | 0.000299 | 0        | 0.000891 | 6.17E-05 | 0.001227 | 0.000111 | 7.46E-05 | 0.000146 |
| 0        | 9.48E-05 | 0        | 0.001871 | 0        | 0.0009   | 0.001457  | 0.000362 | 0.005355 | 0.000427 | 0        | 0.005036 | 0.00023  | 0.000138 | 0.002164 |
| 0        | 0        | 0        | 0.000378 | 0        | 0.000294 | 0         | 0        | 4.59E-05 | 0        | 7.14E-05 | 0.000233 | 0        | 0.000149 | 0        |
| 0        | 0.000393 | 0.000648 | 0.006389 | 0        | 0.000727 | 9.34E-05  | 6.03E-05 | 0.000201 | 0.000342 | 0        | 0.000414 | 2.75E-05 | 0        | 0.00017  |
| 0        | 8.13E-05 | 0.000161 | 0.001736 | 4.38E-05 | 0.000297 | 0         | 0        | 0.000208 | 0.000243 | 7.72E-05 | 0.002149 | 0        | 0        | 0.000177 |
| 0        | 0.000898 | 0.000505 | 0.004629 | 0.00044  | 0.002204 | 6.67E-05  | 6.51E-05 | 0.000498 | 0.000422 | 0.000125 | 0.009872 | 0.000725 | 0.000147 | 0.000729 |
| 0        | 0.004021 | 0.002167 | 0.020183 | 0.006985 | 0.037436 | 0.017165  | 0.004741 | 0.010445 | 0.002043 | 0.000301 | 0.015059 | 0.000142 | 0.000228 | 0.00157  |
| 0        | 0        | 7.90E-05 | 0.000275 | 4.92E-05 | 0.001974 | 0         | 0        | 0.000186 | 0.000154 | 0.000137 | 0.000241 | 3.04E-05 | 6.50E-05 | 0        |
| 0.00026  | 0.001358 | 0.020706 | 0.106997 | 0.00046  | 0.057387 | 0.000697  | 0.000429 | 0.01052  | 0.037518 | 0.006207 | 0.014027 | 0.000724 | 8.99E-05 | 0.000344 |
| 0        | 0        | 0.001703 | 0.024752 | 0.00066  | 0.00857  | 0.000117  | 0.000777 | 0.001064 | 0.002443 | 0.000963 | 0.00239  | 0.000298 | 0        | 0        |
| 0        | 0        | 0        | 0.00014  | 0        | 0        | 0         | 0        | 0        | 0        | 0        | 0        | 0        | 0        | 0.000177 |
| 0        | 0        | 0        | 0.000378 | 0        | 0        | 0         | 0        | 0        | 0        | 0        | 0        | 0        | 0        | 0        |
| 0.003852 | 0.006304 | 0.002455 | 0        | 0        | 0        | 0         | 0        | 0        | 0.007761 | 0.001341 | 0.007768 | 0        | 0.00013  | 0.000768 |
| 0.015818 | 0.002137 | 0.003111 | 0.004531 | 0.000414 | 0.000509 | 0.000147  | 0.000147 | 0.000319 | 0.001654 | 0.00207  | 0.003688 | 0.000246 | 0        | 0.000354 |
| 0.020709 | 0.001572 | 0.004197 | 0.014359 | 0.000124 | 0.000488 | 0.000518  | 0.000678 | 0.000689 | 0.001674 | 0.00087  | 0.003888 | 0.000139 | 5.35E-05 | 0.001608 |
| 0.021876 | 0.0134   | 0.001226 | 0.001288 | 0.000534 | 0        | 0.000758  | 0.000425 | 0.001093 | 0.00359  | 0.000883 | 0.007332 | 0.001115 | 0        | 0.002216 |

|          |          |          |          |          |          |          |          |          |          |          |          |          |          |          |
|----------|----------|----------|----------|----------|----------|----------|----------|----------|----------|----------|----------|----------|----------|----------|
| 0.033848 | 0.025092 | 0.008335 | 0.020944 | 0.002223 | 0.002048 | 0.003911 | 0.002869 | 0.004686 | 0.011922 | 0.002785 | 0.020102 | 0.000521 | 0.000694 | 0.071194 |
| 0.006355 | 0.010771 | 0.007256 | 0.006757 | 0.001247 | 0.001315 | 0.007338 | 0.001281 | 0.005783 | 0.005001 | 0.001441 | 0.007147 | 0.000116 | 6.31E-05 | 0.009872 |
| 0.029084 | 0.009691 | 0.00383  | 0.077803 | 0.001063 | 0.000727 | 0.009447 | 0.001841 | 0.003373 | 0.002338 | 0.00379  | 0.025149 | 0.000135 | 0.000331 | 0.026105 |
| 0.00786  | 0.003939 | 0.001257 | 0.093095 | 0.000554 | 0.000324 | 0.00164  | 0.000195 | 0.001446 | 0.002363 | 0.000326 | 0.017783 | 0.000271 | 0.000241 | 0.006437 |
| 0        | 0.073431 | 0.019898 | 0.022395 | 0        | 0.013222 | 0.030998 | 0.003873 | 0.035264 | 0.038583 | 0        | 0        | 0        | 0        | 0        |
| 0.000562 | 0.000935 | 0.000171 | 0.001143 | 0.000401 | 0.003781 | 0.003494 | 0.00089  | 0.000459 | 0.001023 | 0.000291 | 0.001276 | 0.000177 | 0        | 0.001515 |
| 0.000248 | 0.002357 | 0.001632 | 0.001932 | 0.00093  | 0.001053 | 0.00024  | 0.000458 | 0.004536 | 0.001202 | 0.000357 | 0.005608 | 2.61E-05 | 6.12E-05 | 0.004266 |
| 0.00127  | 0.008709 | 0.041223 | 0.014873 | 0.016915 | 0.007458 | 0.010675 | 0.004157 | 0.048939 | 0.017527 | 0.009282 | 0.022831 | 0.002139 | 0.001139 | 0.019922 |
| 0.000212 | 0.002398 | 0.002585 | 0.002142 | 0.001089 | 0.000485 | 0.000553 | 0.00202  | 0.003627 | 0.00694  | 0.001236 | 0.002258 | 0.000126 | 0.000356 | 0.000729 |
| 0.00696  | 0.044643 | 0.032139 | 0.018564 | 0.022433 | 0.032593 | 0.013214 | 0.021079 | 0.017495 | 0.029366 | 0.007224 | 0.028822 | 0.002008 | 0.001088 | 0.005513 |
| 0.022257 | 0.04818  | 0.01217  | 0.103306 | 0.010267 | 0.024699 | 0.00185  | 0.008264 | 0.012546 | 0.041047 | 0.001991 | 0.083102 | 0.002705 | 0.001283 | 0.008413 |
| 0.005073 | 0.00397  | 0.005092 | 0.005362 | 0.001753 | 0.002695 | 0.01531  | 0.015365 | 0.03171  | 0.023267 | 0.00478  | 0.011378 | 0.000136 | 0.000801 | 0.043932 |
| 0.000973 | 0.002767 | 0.000706 | 0.000303 | 0.000957 | 0.000191 | 0.00023  | 0.000338 | 0.000111 | 0.001075 | 0.000361 | 0.001035 | 7.53E-05 | 0.000132 | 0.000156 |
| 0.000423 | 0.001345 | 0.000352 | 0.000373 | 0.000607 | 0.000571 | 0.000245 | 0.00096  | 0.000331 | 0.000598 | 0.000525 | 0.000497 | 8.40E-05 | 0.000159 | 0.00231  |
| 0.008526 | 0.003008 | 0.00041  | 0.000135 | 0        | 0        | 0        | 0        | 4.84E-05 | 6.62E-05 | 0.000671 | 0.000783 | 8.69E-05 | 0        | 0.006221 |
| 0.093848 | 0.05764  | 0.009304 | 0.020211 | 0.000642 | 0.000224 | 0.00101  | 0        | 0.002551 | 0.000518 | 0.014473 | 0.023798 | 0.001096 | 0.000629 | 0.160865 |
| 0.354611 | 0.05409  | 0.026351 | 0.013846 | 0.01289  | 0.001783 | 0.014216 | 0.005656 | 0.008612 | 0.032892 | 0.012635 | 0.045909 | 0.000473 | 0.000159 | 0.055594 |
| 0.005357 | 0.003651 | 0.000512 | 0.000145 | 0.000571 | 0        | 5.67E-05 | 0.000154 | 0.000169 | 0.000119 | 0.000941 | 0        | 0        | 0        | 0.007003 |
| 0.019149 | 0.001643 | 0.000352 | 0.007467 | 0.008805 | 0.001845 | 0.00128  | 0.001605 | 0.007539 | 0.013992 | 0.007675 | 0.020143 | 4.49E-05 | 0.005258 | 0.082588 |
| 0.049467 | 0.043461 | 0.005637 | 0.010971 | 0.018073 | 0.004319 | 0.074101 | 0.117424 | 0.0451   | 0.039774 | 0.036319 | 0.032383 | 0.003636 | 0.029531 | 0.22195  |
| 0.047544 | 0.12048  | 0.014651 | 0.021709 | 0.00294  | 0.010998 | 0.029954 | 0.013536 | 0.019459 | 0.040466 | 0.012029 | 0.061137 | 0.00115  | 0.001306 | 0.0551   |
| 0.001276 | 0.000556 | 0        | 0        | 0        | 0        | 0.0001   | 6.03E-05 | 0        | 0.000369 | 0.000646 | 0.000117 | 0        | 6.31E-05 | 0.004387 |

| HC103    | HC139    | HC105    | HC130    | HC131    | HC132    | HC133    | HC134    | HC135    | HC136    | HC137    | HC138    | HC058    | HC140    | HC141    |
|----------|----------|----------|----------|----------|----------|----------|----------|----------|----------|----------|----------|----------|----------|----------|
| 0.009413 | 0        | 0.037421 | 0.026246 | 0.013539 | 0.031462 | 0.001746 | 0.017645 | 0.035531 | 0.005772 | 0.033386 | 0.008197 | 0.016619 | 0.016801 | 0.036283 |
| 0        | 0        | 0.000635 | 0        | 0        | 0        | 0        | 0        | 0        | 0.000435 | 0        | 0        | 0.000313 | 0.000648 | 0.000144 |
| 0.003655 | 0        | 0.004253 | 0        | 0.000305 | 0.000739 | 0.000899 | 6.96E-05 | 0.000249 | 0.003559 | 0        | 8.24E-05 | 0.002348 | 0.003139 | 0.001188 |
| 0.000399 | 0        | 0.000384 | 0.002195 | 6.69E-05 | 0.00106  | 0.000284 | 0.000258 | 0.000362 | 0        | 0.001271 | 0        | 0.001122 | 9.78E-05 | 0.000884 |
| 0        | 0        | 0.000598 | 0.004176 | 8.58E-05 | 0.003684 | 0.000152 | 0.000755 | 0.001717 | 0.000118 | 0.002566 | 0.002252 | 0.001417 | 7.34E-05 | 0.002645 |
| 0        | 0        | 8.60E-05 | 0.000398 | 8.16E-05 | 0.000289 | 0        | 4.22E-05 | 0.000179 | 0        | 0.000437 | 0.000959 | 0.002208 | 0        | 0.001167 |
| 0        | 0.000128 | 0.000652 | 0.002024 | 0.000236 | 0.001879 | 0.000184 | 0.000634 | 0.00053  | 6.04E-05 | 0.002621 | 0.003973 | 0.008641 | 4.08E-05 | 0.00412  |
| 0.067196 | 0.000348 | 0.002293 | 0.025806 | 0.004868 | 0.030214 | 0.014169 | 0.009527 | 0.006409 | 0.004662 | 0.011661 | 0.057987 | 0.016668 | 0.003559 | 0.003598 |
| 0.000311 | 0.000103 | 0        | 0.001646 | 0.000308 | 0.003621 | 0.000315 | 0.000137 | 0.000207 | 0.000164 | 4.96E-05 | 0        | 0.000296 | 5.71E-05 | 0.00025  |
| 0        | 0        | 0.000662 | 0.000611 | 0.002707 | 0.001854 | 0.000216 | 6.96E-05 | 0.000934 | 0.000423 | 0        | 0.000119 | 0.001446 | 0.000342 | 0.003588 |
| 0        | 0        | 0.000196 | 0.001081 | 0.001638 | 0.001621 | 0        | 5.96E-05 | 0.000382 | 0.000446 | 0.000439 | 0.000396 | 0.000724 | 0.000314 | 0.001441 |
| 0        | 0.000418 | 0.005956 | 0.002411 | 0.012901 | 0        | 0        | 0.001223 | 0.001023 | 0        | 0.001851 | 0.000112 | 0.007174 | 4.48E-05 | 0.004213 |
| 0.002209 | 0.000106 | 0.328051 | 0.021223 | 0.310638 | 0.083509 | 0.002902 | 0.016678 | 0.090846 | 0.045963 | 0.094372 | 0.044997 | 0.395838 | 0.093407 | 0.306333 |
| 0.000195 | 0        | 0.030405 | 0.001991 | 0.018443 | 0.013969 | 0        | 0.002368 | 0.011769 | 0.009517 | 0.015387 | 0.003907 | 0.017483 | 0.009096 | 0.021987 |
| 0.000417 | 0        | 0.001434 | 0.000204 | 0.000153 | 0.000349 | 0        | 0.001116 | 0.000369 | 0.000717 | 0.001861 | 0.004088 | 0.000831 | 0.000302 | 0.001037 |
| 0.031708 | 0.000126 | 0.288707 | 0.079225 | 0.029641 | 0.080313 | 0.001115 | 0.133733 | 0.04326  | 0.088986 | 0.285346 | 0.420861 | 0.217539 | 0.053954 | 0.257722 |
| 0.000683 | 0        | 0.000913 | 0.000808 | 0.000228 | 0.001478 | 0.000904 | 0.002863 | 0.009533 | 0.012251 | 0.001122 | 0.004003 | 0.001881 | 0.002291 | 0.008729 |
| 0        | 0        | 0.000201 | 0.000621 | 0.000188 | 0.000404 | 0.000179 | 0.000219 | 0.001165 | 0.000614 | 0.000484 | 0.001088 | 0.000326 | 0.001362 | 0.001848 |
| 0.006006 | 0        | 0.030609 | 0.036299 | 0.003954 | 0.044051 | 0.001188 | 0.036318 | 0.034868 | 0.007982 | 0.014022 | 0.017979 | 0.026129 | 0.022517 | 0.00923  |
| 0.000222 | 0        | 0.00192  | 0.000253 | 0.000167 | 0.003102 | 0        | 0.00327  | 0.00087  | 0.006673 | 8.69E-05 | 0.001105 | 0.001873 | 0.004073 | 0.000555 |
| 0        | 0        | 0.017464 | 0        | 0.004849 | 0        | 0        | 0.006503 | 0.001298 | 0.009094 | 0.000208 | 0.006215 | 0.019213 | 0.007832 | 0.007015 |
| 0        | 0        | 0.002339 | 0.000575 | 0.001013 | 9.76E-05 | 0        | 0.001431 | 0.002234 | 0.000159 | 0.002243 | 0.003957 | 0.006662 | 0.003139 | 0.001003 |
| 0.148791 | 0        | 0.001205 | 0.052929 | 0.014179 | 0.000673 | 0.000852 | 0.022664 | 0.037878 | 0.000924 | 0.301501 | 0.065673 | 0.005085 | 0.006662 | 0.013551 |
| 0.000452 | 0        | 0        | 0.001202 | 0.000174 | 0        | 0        | 0        | 0        | 0        | 0.000491 | 0        | 5.22E-05 | 0        | 6.66E-05 |
| 0.001836 | 0.00247  | 0.001185 | 0.003676 | 0.013796 | 0.003809 | 0        | 0.005012 | 0.000462 | 0.001274 | 0.004859 | 0.00117  | 0.001331 | 7.75E-05 | 0.000302 |
| 0.00047  | 0.005593 | 0.000341 | 0.007057 | 0.006012 | 0.000181 | 0        | 0.001548 | 0.001139 | 0.000181 | 0.01791  | 0.000844 | 0.000639 | 0        | 0.00112  |
| 0.000648 | 0.085971 | 0.006856 | 0.003988 | 0.01874  | 0        | 0        | 0.011646 | 0.001246 | 0.000222 | 0.00614  | 0.000317 | 0.00327  | 0        | 0.000361 |
| 0.001526 | 0.055219 | 0.007069 | 0.006337 | 0.039751 | 0.000237 | 0        | 0.016807 | 0.001961 | 0.000856 | 0.006728 | 0.00035  | 0.004887 | 6.52E-05 | 0.001374 |
| 0.000444 | 0        | 0        | 0        | 0        | 0.000119 | 0        | 0.000445 | 0.000203 | 5.54E-05 | 0.000124 | 8.90E-05 | 5.55E-05 | 0        | 9.92E-05 |
| 0        | 0        | 0        | 0.000388 | 0.000103 | 0.000112 | 0        | 0.000191 | 5.24E-05 | 0        | 7.45E-05 | 0        | 0.000353 | 0        | 6.52E-05 |
| 0        | 0.004874 | 0.000132 | 0.000808 | 0.000236 | 0        | 0.000394 | 0.001014 | 0.000456 | 0        | 0.000342 | 0        | 0.000507 | 0        | 0.00016  |
| 0        | 0.002283 | 9.29E-05 | 0.002037 | 7.32E-05 | 0        | 0.000384 | 0.001548 | 0.000295 | 0        | 0.000402 | 0.000119 | 0.001558 | 0        | 0.000153 |
| 0        | 0.005736 | 0.00061  | 0.001823 | 0.001707 | 0.000157 | 0.000431 | 0.000989 | 0.000305 | 0        | 0.00071  | 0.000119 | 0.000838 | 0        | 0.000336 |
| 0.004915 | 0.148837 | 0.03561  | 0.028184 | 0.075599 | 0.000784 | 0.00429  | 0.089983 | 0.047843 | 0.008387 | 0.018861 | 0.002048 | 0.021276 | 0.004069 | 0.012041 |
| 0.042399 | 0.483038 | 0.115879 | 0.110412 | 0.311931 | 0.003611 | 0.009695 | 0.27339  | 0.17674  | 0.0235   | 0.054935 | 0.018613 | 0.08754  | 0.011517 | 0.033524 |
| 0.000169 | 0        | 0.00016  | 0.000601 | 0.00031  | 0        | 0        | 0.000768 | 5.24E-05 | 0        | 0.000243 | 0.000115 | 0.000306 | 0        | 6.96E-05 |
| 0        | 0.000846 | 0        | 0.000184 | 7.53E-05 | 0        | 0        | 0.000278 | 0        | 0        | 0        | 0        | 5.05E-05 | 0        | 0        |
| 0.000177 | 0.016614 | 0.000204 | 0.002526 | 0.003556 | 0.000321 | 0.000189 | 6.46E-05 | 0.000982 | 6.04E-05 | 0.000114 | 0        | 0.000104 | 0        | 0.000221 |
| 0        | 0.014636 | 0.000146 | 0.001994 | 0.003255 | 0.000369 | 0.000447 | 0.000241 | 0.001431 | 0.000239 | 0.000132 | 0        | 0.000545 | 0        | 0.000644 |
| 0        | 0        | 4.30E-05 | 0.000391 | 0        | 0.000453 | 0        | 0        | 6.76E-05 | 0        | 0.000149 | 0.0009   | 9.76E-05 | 0        | 0        |
| 0        | 9.65E-05 | 4.99E-05 | 0.000371 | 0        | 0.000802 | 0.0002   | 0        | 0.000151 | 0        | 0.000308 | 0.001675 | 0.00136  | 0        | 7.26E-05 |
| 0        | 0        | 0        | 0        | 0        | 0.000512 | 0        | 0        | 5.02E-05 | 5.29E-05 | 0.000338 | 0.000808 | 0.001    | 0        | 7.55E-05 |
| 0        | 0        | 0        | 0.002323 | 0        | 0        | 0        | 0        | 9.82E-05 | 0        | 0.000883 | 0.000244 | 3.87E-05 | 0        | 0        |
| 0.000488 | 0        | 0        | 0        | 0        | 0.000373 | 0        | 0        | 3.05E-05 | 0        | 0.000501 | 0.000112 | 0        | 0        | 0        |
| 0        | 0        | 0        | 0        | 0        | 0.000213 | 0        | 0        | 0        | 0        | 0.000112 | 0.000145 | 0        | 4.08E-05 | 0        |
| 0        | 0        | 0.000651 | 0.0032   | 0.000862 | 0.004785 | 0        | 0.000467 | 0.000371 | 0.000677 | 0.000454 | 0.000386 | 0.000867 | 0.000363 | 0.004419 |
| 0.00071  | 0        | 0.000141 | 0.000986 | 0        | 0.001007 | 0        | 0.000646 | 0.000151 | 0.000121 | 0.000402 | 0.001619 | 0.000303 | 0.000216 | 0.001414 |
| 0.000213 | 0.001643 | 0.001896 | 0        | 0.001025 | 0.001202 | 0        | 0.001404 | 0.001699 | 0        | 0.000757 | 0.001438 | 0.002299 | 0.000228 | 0.000539 |
| 0        | 0.000207 | 0        | 0        | 0        | 8.02E-05 | 0        | 0.000132 | 4.14E-05 | 0        | 5.71E-05 | 0.000152 | 0.000241 | 0        | 6.96E-05 |
| 0.004161 | 0        | 3.33E-05 | 0.000644 | 0        | 0.000509 | 0        | 0.000778 | 0.000148 | 0.000508 | 7.69E-05 | 0.002226 | 0.000268 | 0.000155 | 0.000317 |
| 0.000577 | 0        | 0        | 0        | 0        | 8.36E-05 | 0.000237 | 0.000206 | 3.49E-05 | 0.000614 | 0.000166 | 0.001025 | 0        | 0.000432 | 0.000429 |
| 0.018392 | 0        | 0        | 0.002385 | 8.37E-05 | 0        | 0        | 0.000813 | 0.000323 | 0.001598 | 0.006182 | 0.009331 | 0.00019  | 0.000485 | 0.001011 |
| 0.003806 | 0        | 0.014215 | 0.013943 | 0.00323  | 0.008832 | 0        | 0.142773 | 0.002603 | 0.006874 | 0.032992 | 0.039939 | 0.019893 | 0.001574 | 0.001428 |
| 0        | 0        | 6.52E-05 | 0.00021  | 0        | 9.06E-05 | 0        | 0        | 0.000279 | 6.54E-05 | 7.69E-05 | 0.000897 | 0.000369 | 6.52E-05 | 0.000992 |
| 0        | 0        | 0.004382 | 0.004179 | 0.000987 | 0.008177 | 0        | 0.013127 | 0.004136 | 0.015647 | 0.004586 | 0.090296 | 0.007034 | 0.017963 | 0.011833 |
| 0.000444 | 0        | 0.000473 | 0.001781 | 0.000322 | 0.000596 | 0        | 0.000736 | 0.000462 | 0.00221  | 0.004566 | 0.009443 | 0.001043 | 0.001733 | 0.001122 |
| 0        | 0        | 0        | 0        | 0        | 0        | 0        | 0        | 0        | 0        | 5.96E-05 | 0        | 0        | 0        | 0        |
| 0        | 0        | 0        | 0        | 0        | 0        | 0        | 0        | 0        | 0        | 0        | 0.000244 | 0        | 0        | 0        |
| 0.041201 | 0        | 0        | 0.003949 | 0        | 0.000816 | 0.04255  | 0        | 0.000838 | 0.001226 | 0.004772 | 0.003488 | 0        | 0.000114 | 0        |
| 0.008011 | 0.002492 | 9.99E-05 | 0.007182 | 0.000172 | 0.006866 | 0.00817  | 0        | 0.000231 | 4.53E-05 | 0.001194 | 0.002288 | 4.88E-05 | 3.67E-05 | 0.000326 |
| 0.014133 | 0.001464 | 0.000147 | 0.008811 | 0.000542 | 0.006859 | 0.011362 | 0.000651 | 0.000635 | 0.001007 | 0.000454 | 0.002839 | 0.000579 | 0        | 0.000792 |
| 0.007417 | 0.000216 | 0.000225 | 0.006617 | 0        | 0.002008 | 0.004232 | 0.000519 | 0.001158 | 8.81E-05 | 0.000181 | 0.002193 | 0.000192 | 0.00201  | 0.000567 |

|          |          |          |          |          |          |          |          |          |          |          |          |          |          |          |
|----------|----------|----------|----------|----------|----------|----------|----------|----------|----------|----------|----------|----------|----------|----------|
| 0.045806 | 0.005029 | 0.000198 | 0.028109 | 0.004343 | 0.034986 | 0.022834 | 0.008523 | 0.018868 | 0.018811 | 0.001459 | 0.016321 | 0.002767 | 0.021131 | 0.007788 |
| 0.031646 | 0.000903 | 0.000993 | 0.01411  | 0.001617 | 0.0156   | 0.010941 | 0.006172 | 0.009623 | 0.003605 | 0.00067  | 0.004283 | 0.001671 | 0.017319 | 0.002125 |
| 0.00747  | 0.009358 | 0.000935 | 0.022708 | 0.004096 | 0.018978 | 0.033907 | 0.001454 | 0.003497 | 0.001332 | 0.000978 | 0.002252 | 0.000567 | 0.049058 | 0.004232 |
| 0.013876 | 0.000651 | 0.000352 | 0.01093  | 0.00137  | 0.004277 | 0.006199 | 0.001441 | 0.003421 | 0.000619 | 0.000913 | 0.002849 | 0.000296 | 0.002609 | 0.000452 |
| 0.020929 | 0        | 0.004758 | 0        | 0        | 0        | 0        | 0.084039 | 0.086291 | 0.32719  | 0.006361 | 0.017993 | 0.008335 | 7.34E-05 | 0.018944 |
| 0.000878 | 0.000103 | 0.000735 | 0.000207 | 0.000142 | 0.001025 | 0.000195 | 0.000845 | 0.003837 | 0.006897 | 0.001387 | 0.000415 | 0.000705 | 0.00115  | 0.001112 |
| 0.010309 | 0        | 0.000157 | 0.003489 | 0.000195 | 0.001541 | 0.000426 | 0.000723 | 0.000521 | 0.001284 | 0.000387 | 0.001332 | 5.55E-05 | 0.000554 | 0.000114 |
| 0.021364 | 0.000478 | 0.004088 | 0.02509  | 0.018807 | 0.035334 | 0.006767 | 0.019086 | 0.005526 | 0.034271 | 0.003199 | 0.008187 | 0.00417  | 0.018183 | 0.004559 |
| 0.002289 | 0        | 0.000839 | 0.0002   | 0.002891 | 0.002265 | 0.0002   | 0.000492 | 0.000899 | 0.003738 | 0.002283 | 0.002288 | 0.002376 | 0.000465 | 0.001306 |
| 0.009431 | 0.001111 | 0.006048 | 0.018348 | 0.002356 | 0.032916 | 0.004317 | 0.008493 | 0.007195 | 0.010273 | 0.00779  | 0.018995 | 0.006987 | 0.025094 | 0.006655 |
| 0.073939 | 0.003163 | 0.002756 | 0.013739 | 0.001941 | 0.005022 | 0.011588 | 0.001553 | 0.014014 | 0.008236 | 0.015265 | 0.055251 | 0.019596 | 0.007065 | 0.00842  |
| 0.001712 | 0.000833 | 0.009475 | 0.014682 | 0.005328 | 0.022292 | 0.003176 | 0.002619 | 0.014553 | 0.017172 | 0.000834 | 0.000894 | 0.010728 | 0.032742 | 0.010721 |
| 0.000603 | 0        | 0.000254 | 0.002838 | 0        | 0.00252  | 0.001141 | 0.000142 | 0.000131 | 0.000607 | 0.000179 | 0.000448 | 0.000229 | 0.00051  | 0.000361 |
| 0.000435 | 0.000123 | 0.000111 | 0.0043   | 0        | 0.002844 | 0.001378 | 0.000194 | 0.000175 | 0.000707 | 0.000109 | 0.000115 | 0.000162 | 0.00055  | 0.000158 |
| 0.001144 | 0        | 0        | 0.001498 | 0.000144 | 0.000477 | 0.020684 | 0        | 0.000192 | 0.000395 | 0.000102 | 0.000145 | 0        | 0.000212 | 6.37E-05 |
| 0.28785  | 0.006426 | 0        | 0.018858 | 0.004985 | 0.006528 | 0.47802  | 0.000127 | 0.001414 | 0.018194 | 0.001452 | 0.001942 | 0.00021  | 0.010563 | 0.001664 |
| 0.006885 | 0.00729  | 0.001405 | 0.043852 | 0.003349 | 0.02331  | 0.109096 | 0.00615  | 0.006532 | 0.013119 | 0.001643 | 0.011553 | 0.002132 | 0.072806 | 0.034962 |
| 0        | 0.004057 | 0        | 0.002615 | 0.00069  | 0.005974 | 0.00541  | 0        | 0.001806 | 0.000143 | 0        | 0        | 0        | 0.000183 | 0.00033  |
| 0.002032 | 0.038212 | 0.000205 | 0.006229 | 0.012491 | 0.052646 | 0.009022 | 0.009606 | 0.018905 | 0.010169 | 0.000573 | 0.001929 | 0.009313 | 0.012757 | 0.001847 |
| 0.02375  | 0.085578 | 0.007772 | 0.232296 | 0.028616 | 0.23234  | 0.120547 | 0.013811 | 0.135984 | 0.157468 | 0.002159 | 0.003146 | 0.011145 | 0.235602 | 0.10462  |
| 0.013858 | 0.002243 | 0.011831 | 0.045846 | 0.003694 | 0.133356 | 0.045331 | 0.010772 | 0.137642 | 0.10159  | 0.010009 | 0.006242 | 0.007584 | 0.220273 | 0.024943 |
| 0        | 0.000979 | 0        | 0.001147 | 0.000213 | 0.007438 | 0.001136 | 0        | 0.000687 | 0.000151 | 0        | 0        | 0        | 0.000204 | 0.000147 |

| HC142    | HC143    | HC144    | HC145    | HC146    | HC147    | HC148     | HC129    | HC128    | HC127    | HC126    | HC106    | HC107    | HC108    | HC109    |
|----------|----------|----------|----------|----------|----------|-----------|----------|----------|----------|----------|----------|----------|----------|----------|
| 0.040486 | 0.012049 | 0.066203 | 0.013401 | 0.085159 | 0.258425 | 0.027492  | 0.105221 | 0.020634 | 0.013753 | 0.004949 | 0.000251 | 0.008315 | 0.007246 | 0.006444 |
| 0        | 0.000375 | 0.000754 | 0.000295 | 0.000309 | 0.00034  | 0.000165  | 0        | 0.002211 | 0        | 0        | 0        | 0.000115 | 0        | 0        |
| 0.00015  | 0.004901 | 0.01076  | 0.001982 | 0.004222 | 0.006964 | 0.004666  | 0.000243 | 0.024184 | 0.000586 | 0.001784 | 7.67E-05 | 0.001575 | 0.001228 | 0.000103 |
| 0.000224 | 0.001869 | 2.86E-05 | 0.001091 | 0.001334 | 0.000693 | 0.000837  | 0.00122  | 0.002113 | 0.002269 | 7.69E-05 | 7.99E-05 | 0.000205 | 0.000146 | 0        |
| 0.000139 | 0.003431 | 5.01E-05 | 0.001045 | 0.009637 | 0.000902 | 0.002725  | 0.003494 | 0.002766 | 0.005109 | 0.000166 | 0        | 0.000949 | 0.000508 | 0        |
| 7.68E-05 | 0.001558 | 4.77E-05 | 0.000144 | 0.000459 | 8.21E-05 | 0.00124   | 0.000162 | 0.000167 | 0.007557 | 6.31E-05 | 0.000125 | 0.000927 | 0        | 0        |
| 0.000439 | 0.009889 | 7.40E-05 | 0.001026 | 0.005117 | 0.001721 | 0.006202  | 0.00241  | 0.001471 | 0.030183 | 0.000473 | 0        | 0.005227 | 0.000195 | 0        |
| 0        | 0.011866 | 0.010058 | 0.014607 | 0.023448 | 0.069298 | 0.017089  | 0.022226 | 0.021585 | 0.024187 | 0.005576 | 0.006126 | 0.005206 | 0.075214 | 0.037172 |
| 0        | 0.000442 | 7.16E-05 | 0.000967 | 0.003075 | 0.000196 | 0.000144  | 0        | 0.002231 | 0.001304 | 0.000197 | 0.000588 | 0.00024  | 0.004859 | 0.000103 |
| 0.004333 | 0.000295 | 0.000184 | 0.000586 | 0.003911 | 0.001437 | 0.001265  | 0.000347 | 0.002109 | 0.005877 | 0.002291 | 0.004893 | 0.005803 | 0.000183 | 0.000131 |
| 0.000939 | 0.00102  | 0.000234 | 0.000239 | 0.002554 | 0.000284 | 0.001081  | 0.000535 | 0.001285 | 0.002785 | 0.003522 | 0.001198 | 0.001671 | 0.000325 | 0.000176 |
| 0.013197 | 0.00151  | 0.000888 | 0.000593 | 0.000586 | 0.000221 | 0.005357  | 0.002579 | 0.000181 | 0.017378 | 0.012671 | 0.004228 | 0.016696 | 0        | 0.000299 |
| 0.330255 | 0.130194 | 0.069997 | 0.015108 | 0.083486 | 0.416048 | 0.449111  | 0.275204 | 0.078285 | 0.520982 | 0.149904 | 0.502152 | 0.442122 | 0.003074 | 0.036969 |
| 0.031061 | 0.006435 | 0.007154 | 0.000917 | 0.005536 | 0.015098 | 0.050044  | 0.02053  | 0.00814  | 0.04078  | 0.01861  | 0.029779 | 0.028153 | 0.00135  | 0.001671 |
| 0.000279 | 0.001793 | 0.000227 | 0.001206 | 0.00064  | 0.001079 | 0.002202  | 0.00433  | 0        | 0        | 0        | 0.000577 | 0.000301 | 0.000199 | 0.001653 |
| 0.040981 | 0.214751 | 0.059478 | 0.135815 | 0.050038 | 0.127612 | 0.25145   | 0.353933 | 0.048074 | 0.001222 | 0.012081 | 0.048405 | 0.052266 | 0.041755 | 0.219558 |
| 0.000491 | 0.001761 | 0.007104 | 0.003709 | 0.007219 | 0.000283 | 0.001796  | 0.002271 | 0.000701 | 0.000289 | 0.000556 | 0.001011 | 0.001597 | 0.009735 | 0.003534 |
| 0.000132 | 0.001363 | 0.001408 | 0.000573 | 0.000728 | 0.000304 | 0.001124  | 0.000156 | 0.001    | 0        | 6.90E-05 | 0.000181 | 0.000314 | 0.000882 | 0.00068  |
| 0.000984 | 0.032812 | 0.021694 | 0.006904 | 0.019639 | 0.031003 | 0.015054  | 0.023316 | 0.036296 | 0.041428 | 0.021719 | 0.027712 | 0.010009 | 0.082794 | 0.191072 |
| 0        | 0.003068 | 0.002455 | 0.001225 | 0.009445 | 6.27E-05 | 0.000531  | 0        | 0        | 0.001351 | 7.49E-05 | 0.00274  | 0.000182 | 0.013196 | 0.007429 |
| 3.66E-05 | 0.006642 | 0.003002 | 0.00133  | 0.001923 | 0.00061  | 0.004443  | 0.003873 | 0.000142 | 0.005109 | 0.005365 | 0.007338 | 0.00942  | 0.001151 | 0.003755 |
| 0.000162 | 0.006371 | 0.00367  | 0.00096  | 0.001235 | 2.92E-05 | 0.001771  | 0        | 0.001221 | 0.000663 | 0        | 0.00516  | 0.006125 | 0        | 0.001395 |
| 0.251873 | 0.026341 | 0.006192 | 0.041979 | 0.026164 | 0.000607 | 0.052851  | 0.007834 | 0.013759 | 0.000945 | 0.000617 | 0.212565 | 0.015806 | 0.000773 | 0.009223 |
| 0.001761 | 0        | 0        | 0.000396 | 0.000954 | 0        | 0.00037   | 0        | 0.000147 | 0        | 7.89E-05 | 0.002173 | 0.000281 | 0        | 0        |
| 0.000923 | 0.018221 | 6.20E-05 | 0.00152  | 0.000566 | 0.000304 | 0.001676  | 0.009936 | 0.01169  | 0.00011  | 0.000278 | 0.011262 | 0.002044 | 0        | 2.90E-05 |
| 0.024084 | 0.001948 | 0.000592 | 0.001301 | 0.001141 | 6.27E-05 | 0.0003055 | 0.005774 | 0.003075 | 0.000339 | 0.000556 | 0.007743 | 0.003463 | 0        | 0.000223 |
| 0.006185 | 0.007423 | 0.000935 | 0.000596 | 0.000331 | 0.000117 | 0.001006  | 0.010883 | 0.005997 | 0.000494 | 0.000726 | 0.003167 | 0.003802 | 0        | 0.000274 |
| 0.017241 | 0.017571 | 0.003396 | 0.001569 | 0.000677 | 0.000223 | 0.001946  | 0.010438 | 0.006394 | 0.001369 | 0.00211  | 0.002458 | 0.007557 | 0        | 0.000278 |
| 0.000112 | 0.000462 | 0.000637 | 0        | 0        | 0        | 0         | 0        | 0.000172 | 0.001124 | 0        | 0        | 0.001741 | 0        | 3.08E-05 |
| 0        | 0.000135 | 7.87E-05 | 0        | 0        | 0        | 8.50E-05  | 0        | 0        | 0.00011  | 6.11E-05 | 0        | 5.66E-05 | 0        | 5.08E-05 |
| 0        | 0.001084 | 0.000107 | 0.000459 | 0.000295 | 0        | 0.000292  | 0.000354 | 0.000598 | 0.001738 | 0.000597 | 0        | 0.001118 | 0        | 0        |
| 4.76E-05 | 0.00043  | 0.000341 | 0.000423 | 0        | 0        | 0.000176  | 0.000263 | 0.000677 | 0.003575 | 0.000497 | 0        | 0.000406 | 0        | 0        |
| 0.000524 | 0.001151 | 0.00037  | 0.000128 | 0.000161 | 0        | 0.000685  | 0.000127 | 0.000181 | 0.002369 | 0.001418 | 0.000254 | 0.003623 | 0        | 0.000171 |
| 0.031311 | 0.011714 | 0.074151 | 0.01076  | 0.003817 | 0.0005   | 0.005171  | 0.011055 | 0.009307 | 0.028408 | 0.049286 | 0.002128 | 0.030415 | 0.001212 | 0.025263 |
| 0.108116 | 0.056865 | 0.307713 | 0.026484 | 0.013576 | 0.001575 | 0.028264  | 0.03307  | 0.028754 | 0.10074  | 0.210409 | 0.006745 | 0.129611 | 0.002899 | 0.13105  |
| 5.37E-05 | 0.000653 | 3.34E-05 | 0        | 0.000127 | 0        | 0.000146  | 0.00012  | 0        | 0        | 7.69E-05 | 0        | 3.71E-05 | 0        | 0        |
| 0        | 0        | 5.97E-05 | 6.23E-05 | 0        | 0        | 3.21E-05  | 0        | 0        | 0.000327 | 0.000885 | 0        | 0.000133 | 0        | 0        |
| 0.001018 | 0.000319 | 0.000143 | 0.001386 | 0.002056 | 0        | 0.000183  | 0        | 0.001054 | 0.001177 | 0.003591 | 0.000543 | 0.001751 | 0.000366 | 0.000136 |
| 0.001719 | 0.000506 | 0.000682 | 0.000852 | 0.000736 | 0        | 0.000111  | 0        | 0.001255 | 0.00093  | 0.004218 | 0.000855 | 0.002336 | 0.000183 | 0.000152 |
| 0        | 0.003713 | 0        | 0.00022  | 0        | 0        | 0.000228  | 0        | 0.000922 | 0.000526 | 0        | 0        | 0.000226 | 0        | 0        |
| 0        | 0.011682 | 0        | 5.90E-05 | 0        | 0        | 0.000422  | 0        | 0.000177 | 0.001177 | 0        | 0        | 0        | 0.000777 | 5.08E-05 |
| 0        | 0.005829 | 0        | 6.55E-05 | 0        | 0        | 0.00025   | 0        | 0        | 0.000691 | 0        | 0        | 0        | 0        | 0        |
| 0        | 0.000295 | 0        | 0        | 0.000246 | 0        | 0.00013   | 0        | 0.000534 | 0        | 0        | 0        | 0        | 0        | 2.90E-05 |
| 0        | 0.000139 | 0        | 0        | 0        | 0        | 2.41E-05  | 0        | 0.000329 | 0        | 0        | 0        | 0        | 0        | 0        |
| 0        | 0.000231 | 0.000136 | 0.000285 | 0        | 0        | 0         | 0        | 0.000544 | 0        | 0        | 0        | 0        | 0.000228 | 0        |
| 0.001533 | 0.001144 | 0.000203 | 0.004302 | 0.002492 | 0.00021  | 0.000889  | 0.00026  | 0.002628 | 0        | 0.000666 | 0.003255 | 0.000792 | 0.00174  | 9.61E-05 |
| 5.24E-05 | 0.001741 | 0.000105 | 0.001874 | 0.000753 | 2.65E-05 | 0.000464  | 0.000753 | 0.000593 | 0        | 0.000296 | 0.000112 | 0.000232 | 0.001322 | 0.000265 |
| 0.001384 | 0.008124 | 0.001993 | 0.000213 | 0        | 0.000522 | 0.000112  | 0.002942 | 0        | 0        | 6.70E-05 | 0.000179 | 0.000183 | 0.000252 | 0.000258 |
| 0        | 0.002881 | 0        | 8.52E-05 | 0        | 0        | 0         | 0        | 0.000191 | 0        | 0        | 0        | 5.07E-05 | 0.000179 | 0        |
| 0        | 0.001546 | 0        | 0.000357 | 0        | 0        | 3.85E-05  | 0        | 0.000564 | 0        | 6.11E-05 | 0        | 0        | 0.002851 | 0.000192 |
| 0        | 0.000693 | 0.00015  | 5.24E-05 | 0.000142 | 6.13E-05 | 6.74E-05  | 0        | 0.000628 | 0        | 0        | 5.59E-05 | 6.83E-05 | 0.00076  | 0.000183 |
| 0        | 0.028345 | 0.001501 | 0.001484 | 0        | 0.000104 | 0.000563  | 0        | 0.005879 | 0        | 8.08E-05 | 0        | 0.000142 | 0.015058 | 0.000287 |
| 4.02E-05 | 0.088302 | 0.027091 | 0.006311 | 0.00043  | 0.01553  | 0.000715  | 0.029505 | 0.02035  | 0        | 0.000187 | 0.000123 | 0.000111 | 0.00037  | 0.044312 |
| 0        | 0.001183 | 0.000389 | 0.000147 | 0        | 0        | 8.66E-05  | 8.43E-05 | 0        | 0        | 0        | 0        | 0        | 0        | 9.43E-05 |
| 0        | 0.015412 | 0.004739 | 0.002585 | 0.000895 | 0.000306 | 0.003899  | 0.001495 | 0.00128  | 0.000531 | 0.001124 | 0.000443 | 0.001536 | 0.01455  | 0.001469 |
| 0        | 0.01224  | 0.000787 | 0.000816 | 0        | 0.002017 | 0.000622  | 0        | 0.002442 | 0        | 0.000239 | 6.71E-05 | 0.000158 | 0.004583 | 0.002219 |
| 0        | 0        | 0        | 0        | 0        | 0        | 0         | 0        | 0        | 0        | 0        | 0        | 0        | 0        | 0        |
| 0        | 0        | 0        | 0        | 0        | 0        | 0         | 0        | 0        | 0        | 0        | 0        | 0        | 0        | 0        |
| 0        | 0        | 0.000616 | 0.008024 | 0        | 0.000432 | 7.70E-05  | 0        | 0.00586  | 0        | 0        | 0        | 0.000871 | 0.016242 | 0        |
| 3.90E-05 | 0.000996 | 0.000308 | 0.004541 | 0.002005 | 0        | 0.000303  | 8.76E-05 | 0.005016 | 0.000491 | 0.000239 | 0.000288 | 0.006357 | 0.001521 | 0.000136 |
| 5.49E-05 | 0.002411 | 0.00027  | 0.007366 | 0.001875 | 3.06E-05 | 0.00094   | 0        | 0.006007 | 0.000853 | 0.001771 | 0.000623 | 0.001786 | 0.005022 | 0.000497 |
| 0        | 0.000717 | 0.005722 | 0.000976 | 0.002475 | 0.001007 | 0.000258  | 0.000237 | 0.000976 | 0.000202 | 0.000534 | 8.31E-05 | 0.000375 | 0.00316  | 0.000455 |

|          |          |          |          |          |          |          |          |          |          |          |          |          |          |          |
|----------|----------|----------|----------|----------|----------|----------|----------|----------|----------|----------|----------|----------|----------|----------|
| 0.000184 | 0.00369  | 0.005629 | 0.042215 | 0.065913 | 0.001061 | 0.002217 | 0.000451 | 0.011768 | 0.005956 | 0.020319 | 0.002277 | 0.003424 | 0.058427 | 0.002877 |
| 4.51E-05 | 0.001733 | 0.005615 | 0.020577 | 0.014777 | 0.000549 | 0.001636 | 0.000633 | 0.002447 | 0.001189 | 0.020897 | 0.000243 | 0.001655 | 0.015501 | 0.004414 |
| 0.00014  | 0.003399 | 0.000897 | 0.086549 | 0.032083 | 0.000125 | 0.000796 | 0.000373 | 0.017202 | 0.001481 | 0.012994 | 0.000686 | 0.004397 | 0.029998 | 0.014355 |
| 0        | 0.00296  | 0.003878 | 0.007323 | 0.0035   | 0.0004   | 0.000284 | 0.000636 | 0.002256 | 0.000421 | 0.002017 | 0.000113 | 0.000312 | 0.00893  | 0.003396 |
| 0        | 0        | 0.000208 | 0        | 0        | 0        | 0        | 0        | 0        | 0        | 0        | 0        | 0        | 0        | 0        |
| 0.000461 | 0.00039  | 0.001957 | 0.001556 | 0.000671 | 0.000579 | 0.000473 | 0        | 0        | 0        | 0.000491 | 6.23E-05 | 5.86E-05 | 0.000211 | 0.001117 |
| 0        | 0.001052 | 0.001181 | 0.001278 | 0.000481 | 0.000283 | 0.000505 | 0.000266 | 0.000608 | 0.000222 | 0.00027  | 0.000187 | 0.000488 | 0.007438 | 0.008922 |
| 0.000824 | 0.009391 | 0.017334 | 0.015675 | 0.00608  | 0.002105 | 0.006821 | 0.013559 | 0.009302 | 0.007911 | 0.00446  | 0.007055 | 0.017621 | 0.019255 | 0.082342 |
| 0.00018  | 0.001948 | 0.001732 | 0.001366 | 0.002384 | 0.000923 | 0.001689 | 0.000769 | 0.000755 | 8.98E-05 | 0.000122 | 0        | 0.002543 | 0.006173 | 0.002489 |
| 0        | 0.019245 | 0.014136 | 0.0229   | 0.009238 | 0.001842 | 0.004637 | 0.002011 | 0.013137 | 0.01204  | 0.004421 | 0.002368 | 0.002172 | 0.050778 | 0.012069 |
| 8.29E-05 | 0.142558 | 0.015539 | 0.030622 | 0.003639 | 0.00032  | 0.00478  | 0.01921  | 0.032662 | 0.005198 | 0.00767  | 0.000353 | 0.00277  | 0.002505 | 0.007458 |
| 0.003569 | 0.004478 | 0.010044 | 0.003054 | 0.014279 | 0.000246 | 0.005859 | 0.002845 | 0.007169 | 0.005141 | 0.070936 | 0.001419 | 0.007179 | 0.018759 | 0.016254 |
| 0        | 0.000837 | 0.000267 | 0.001199 | 0.000578 | 2.92E-05 | 9.62E-05 | 0.000172 | 0.001236 | 0.00099  | 0.00095  | 0.0003   | 0.000281 | 0.005913 | 8.34E-05 |
| 0        | 0.001028 | 0.000356 | 0.000629 | 0.001552 | 1.39E-05 | 0.000167 | 0        | 0.00074  | 0.002044 | 0.001424 | 0.000558 | 0.000232 | 0.004591 | 3.08E-05 |
| 3.66E-05 | 0        | 0.000179 | 0.002611 | 0.001654 | 0        | 9.30E-05 | 0        | 0.003138 | 0.000209 | 0.002768 | 0        | 0.003248 | 0.013968 | 3.63E-05 |
| 0.000306 | 0.000398 | 0.012005 | 0.047857 | 0.010971 | 0.000592 | 0.002879 | 0        | 0.152995 | 0.003393 | 0.019392 | 0        | 0.03354  | 0.179547 | 0.002973 |
| 0.000618 | 0.000853 | 0.030151 | 0.139363 | 0.139082 | 0.004749 | 0.001216 | 0.004434 | 0.033246 | 0.000825 | 0.044164 | 0.000527 | 0.010425 | 0.105513 | 0.041431 |
| 9.39E-05 | 0        | 0.000286 | 0.00846  | 0.011478 | 3.48E-05 | 9.30E-05 | 0        | 0.001731 | 0.000419 | 0.005592 | 0.000187 | 0.001249 | 0.004347 | 0        |
| 0.000783 | 0.003227 | 0.022433 | 0.029489 | 0.089093 | 0.005465 | 0.002634 | 0.001074 | 0.080849 | 0.004692 | 0.007735 | 0.010402 | 0.024086 | 0.001582 | 0.025856 |
| 0.077632 | 0.012937 | 0.086961 | 0.152879 | 0.141571 | 0.02319  | 0.006067 | 0.003464 | 0.211621 | 0.058733 | 0.16762  | 0.06905  | 0.031481 | 0.068776 | 0.026877 |
| 0.002451 | 0.002857 | 0.064033 | 0.050963 | 0.06241  | 0.00114  | 0.005055 | 0.002838 | 0.023086 | 0.017046 | 0.083682 | 0.005818 | 0.036521 | 0.076454 | 0.01741  |
| 0.00015  | 0.000175 | 0.000131 | 0.002031 | 0.006947 | 2.65E-05 | 7.54E-05 | 0        | 0.001275 | 0.000962 | 0.001258 | 0.000652 | 0.001833 | 0.003245 | 4.54E-05 |

| HC110    | HC111    | HC112    | HC113    | HC114    | HC104    | HC115    | HC117    | HC118    | HC119    | HC120    | HC121    | HC122    | HC123    | HC124    |
|----------|----------|----------|----------|----------|----------|----------|----------|----------|----------|----------|----------|----------|----------|----------|
| 0.012043 | 0.009414 | 0.063934 | 0.028368 | 0.034986 | 0.007928 | 0.006081 | 0.059411 | 0.020731 | 0.03551  | 0.004418 | 0.003208 | 0.014548 | 0.008007 | 0.004802 |
| 0        | 0        | 0.000618 | 0        | 0        | 0.000265 | 0        | 0.002508 | 0.000283 | 0.000764 | 0.009207 | 7.79E-05 | 0.003004 | 0        | 0        |
| 0.000241 | 0        | 0.004914 | 0        | 0.000227 | 0.001915 | 0.000166 | 0.014043 | 0.000807 | 0.00623  | 0.010569 | 0.000291 | 0.03475  | 0.003172 | 0        |
| 0.002137 | 0        | 0.003462 | 2.92E-05 | 0.000459 | 0.000691 | 0.000114 | 0.003734 | 0.000269 | 0.007131 | 0.001099 | 0.000142 | 0.002046 | 0.000959 | 5.37E-05 |
| 0.003284 | 0.000181 | 0.004554 | 3.16E-05 | 0.000447 | 0.001208 | 0.000304 | 0.005496 | 0.002008 | 0.011449 | 0.00037  | 0.000351 | 0.003276 | 0.001487 | 0.000142 |
| 0.002855 | 0        | 0.000889 | 0        | 0.000138 | 0.001563 | 0.000842 | 0.000289 | 0.001143 | 0.004232 | 0.00129  | 0.001326 | 0.002117 | 0.000825 | 0.000345 |
| 0.009453 | 6.83E-05 | 0.002131 | 0        | 0.00032  | 0.004572 | 0.002505 | 0.001205 | 0.003213 | 0.006093 | 0.002556 | 0.008258 | 0.004057 | 0.002686 | 0.00375  |
| 0.032438 | 0.001808 | 0.025082 | 0.001102 | 0.007313 | 0.009795 | 0.018774 | 0.003121 | 0.042913 | 0.017263 | 0.031264 | 0.02701  | 0.099614 | 0.115761 | 0.010293 |
| 0.000783 | 0        | 0.000437 | 0        | 4.30E-05 | 0.000293 | 0.000358 | 0        | 0        | 0.000572 | 0.000585 | 0.000442 | 0.003099 | 0.005371 | 0.000238 |
| 0.001271 | 0.000772 | 0.000387 | 0.000975 | 0.000244 | 0.000177 | 0.00099  | 0        | 0.000149 | 0.000999 | 0        | 0.002252 | 0        | 0.00074  | 0.003442 |
| 0.001118 | 0.000368 | 0.000898 | 0.000506 | 0.000294 | 0.000218 | 0.001453 | 0.000204 | 0.000706 | 0.001081 | 0.000597 | 0.001043 | 0.000284 | 0.000648 | 0.000373 |
| 0.001142 | 9.50E-05 | 0.001808 | 0.003586 | 0.001171 | 0.000884 | 0.027459 | 0.000423 | 0        | 0.003695 | 0        | 0.011776 | 0.000355 | 0.000155 | 0.008828 |
| 0.102118 | 0.012796 | 0.072344 | 0.241986 | 0.041266 | 0.092415 | 0.195238 | 0.034673 | 0.123449 | 0.060657 | 0.015548 | 0.394768 | 0.036773 | 0.032523 | 0.641788 |
| 0.00548  | 0.001389 | 0.008056 | 0.034908 | 0.005109 | 0.011975 | 0.007463 | 0.002036 | 0.016518 | 0.002872 | 0.00252  | 0.022499 | 0.002933 | 0.001142 | 0.008592 |
| 0        | 0.000309 | 0.001857 | 0.000934 | 0.000912 | 0.002985 | 0.000649 | 0.000528 | 0.001527 | 0.001273 | 0        | 0.001539 | 0.000887 | 0.001142 | 0.00053  |
| 0.009053 | 0.018823 | 0.279574 | 0.152512 | 0.163896 | 0.467311 | 0.086987 | 0.153855 | 0.22708  | 0.155164 | 0.048245 | 0.197721 | 0.070506 | 0.218989 | 0.093526 |
| 0.001689 | 8.02E-05 | 0.003161 | 0.001286 | 0.000464 | 0.003374 | 0.000222 | 0.005306 | 0.00524  | 0.000964 | 0.001218 | 0.001881 | 0.001455 | 0.004532 | 0.000184 |
| 0        | 0        | 0.001264 | 0.000341 | 0.000157 | 0.001799 | 0.000753 | 0.000662 | 0.001648 | 0.000709 | 0.00031  | 0.00035  | 0.000201 | 0.00117  | 0.000518 |
| 0.031967 | 0.001024 | 0.03586  | 0.012257 | 0.027098 | 0.027638 | 0.021131 | 0.020095 | 0.023128 | 0.021926 | 0.014822 | 0.026778 | 0.004589 | 0.02613  | 0.02326  |
| 0.000624 | 0        | 0        | 0.000319 | 3.61E-05 | 0.001597 | 0        | 0.000303 | 0.00025  | 0.000192 | 0        | 0.001481 | 0.000225 | 0.002397 | 0        |
| 0.001419 | 0        | 0.001288 | 0.001547 | 0.000664 | 0.00424  | 0.000856 | 0        | 0.010385 | 0.000635 | 0.000991 | 0.006685 | 0.00026  | 0.000684 | 0        |
| 0.000241 | 0        | 0.041466 | 0.001604 | 0.001072 | 0.002056 | 0.000231 | 0.000345 | 0.004827 | 0.002598 | 0.001111 | 0.001673 | 0        | 0.015282 | 0        |
| 0.613172 | 0.060703 | 0.003684 | 0.332461 | 0.000955 | 0.137738 | 0        | 0.003086 | 0.000154 | 0.217886 | 0.014485 | 0.0793   | 0.002839 | 0.056333 | 0.01727  |
| 0.001466 | 0.002711 | 0.000141 | 0.000714 | 3.44E-05 | 0.000114 | 0        | 0        | 0        | 0.001528 | 0        | 0.000417 | 0.000296 | 0.000952 | 9.80E-05 |
| 0.024692 | 0.001568 | 0.009249 | 0.003358 | 0.000411 | 0.003662 | 0.000449 | 0.014338 | 0.003309 | 0.008777 | 0        | 0.00197  | 0.001029 | 0.00535  | 0.003223 |
| 0.004179 | 0.002435 | 0.002737 | 0.008317 | 3.44E-05 | 0.003162 | 9.98E-05 | 0.001311 | 0        | 0.019669 | 0.000346 | 0.007531 | 0.000213 | 0.000634 | 0.003293 |
| 0.004026 | 0.001621 | 0.0052   | 0.002587 | 0.00156  | 0.003494 | 0.001671 | 0.002677 | 0.000159 | 0.014905 | 0        | 0.0062   | 0.001585 | 0.000155 | 0.005164 |
| 0.00797  | 0.002304 | 0.006842 | 0.005734 | 0.001591 | 0.003657 | 0.004085 | 0.003784 | 0.000797 | 0.016492 | 0        | 0.00693  | 0.00168  | 0.000529 | 0.006139 |
| 0        | 0        | 0.000231 | 0        | 3.96E-05 | 0        | 0        | 0.000514 | 0        | 0        | 0.001123 | 0.000177 | 0        | 0        | 0        |
| 0        | 0        | 0.00012  | 3.65E-05 | 8.60E-05 | 0        | 0.001108 | 0        | 0        | 0        | 0        | 0.000331 | 0        | 0.000211 | 0.000159 |
| 0.001931 | 8.31E-05 | 0.001085 | 0        | 0.000179 | 0.000473 | 0.001561 | 0.000853 | 0        | 0.002425 | 0.00049  | 0.001711 | 0.004696 | 0.00067  | 0.000161 |
| 0        | 0        | 0.000799 | 0        | 4.47E-05 | 0.000295 | 0.001131 | 0.000895 | 0        | 0.00382  | 0.001015 | 0.000794 | 0.003809 | 0        | 0.000205 |
| 0.000512 | 0.000303 | 0.001135 | 0.000281 | 0.000213 | 0.000497 | 0.012598 | 0.000824 | 0.000168 | 0.0021   | 0.00074  | 0.000628 | 0.001171 | 0.00031  | 0.001349 |
| 0.00246  | 0.011736 | 0.025101 | 0.016718 | 0.052064 | 0.009738 | 0.086883 | 0.016107 | 0.003929 | 0.027933 | 0.008538 | 0.022235 | 0.024874 | 0.002051 | 0.012463 |
| 0.009577 | 0.044377 | 0.093315 | 0.051577 | 0.221812 | 0.032766 | 0.346448 | 0.050477 | 0.016624 | 0.090032 | 0.036423 | 0.087635 | 0.09564  | 0.007274 | 0.045472 |
| 0        | 0        | 0.0004   | 0        | 0.000705 | 0.000236 | 0.001565 | 0        | 0        | 0.000921 | 0        | 0.000406 | 0.000166 | 0        | 0.000392 |
| 0        | 0.000335 | 0.000274 | 4.87E-05 | 3.44E-05 | 0        | 0.000983 | 0        | 0        | 0.000447 | 0.00031  | 6.84E-05 | 0.000248 | 0        | 0        |
| 0        | 0.001793 | 0.001085 | 8.76E-05 | 0.000404 | 0        | 0.000225 | 0        | 0        | 0.00136  | 0        | 0.00112  | 0.001053 | 0.000204 | 0.000579 |
| 0        | 0.003088 | 0.000501 | 0.000574 | 0.000349 | 7.27E-05 | 0.00078  | 0        | 0        | 0.0004   | 0.000263 | 0.000809 | 0.000733 | 0        | 0.007    |
| 0.003667 | 0        | 0.000553 | 0        | 0        | 0.001388 | 8.73E-05 | 0.001008 | 0.000956 | 0.002198 | 0.000597 | 0.00014  | 0.004495 | 0.000493 | 0.000121 |
| 0.001707 | 0        | 0.001608 | 4.26E-05 | 0        | 0.002887 | 9.98E-05 | 0.000197 | 0.003021 | 0.003327 | 0.004084 | 0.000604 | 0.001124 | 0.000472 | 6.53E-05 |
| 0.000288 | 0        | 0.000292 | 0        | 4.64E-05 | 0.001673 | 0        | 0        | 0.001672 | 0.001681 | 0.000609 | 0.000237 | 0.000272 | 0        | 0.000114 |
| 0.000524 | 0        | 0.000932 | 0        | 0        | 6.87E-05 | 0.000181 | 0.001621 | 0.000144 | 0.001661 | 0        | 9.06E-05 | 0.002732 | 0.000451 | 0.000159 |
| 0.000218 | 0        | 0.000695 | 0        | 0        | 0.00023  | 0        | 0.000902 | 0.000956 | 0.001054 | 0.000346 | 0        | 0        | 0.000367 | 0        |
| 0        | 0        | 0        | 0        | 0.00064  | 0        | 0.000187 | 0        | 0        | 0        | 0        | 0        | 0        | 0        | 0        |
| 0.000306 | 0.001191 | 0.001928 | 0.001143 | 0.000807 | 0.002631 | 0.000952 | 0.000345 | 0.000144 | 0.004569 | 0        | 0.002139 | 0.00097  | 0.001586 | 0.000688 |
| 0.000312 | 0.000407 | 0.001082 | 7.78E-05 | 0.000454 | 0.000591 | 0.002759 | 0.001487 | 0.00183  | 0.001485 | 0.000227 | 0.000289 | 0.00084  | 0.001882 | 6.53E-05 |
| 0.000259 | 0        | 9.22E-05 | 0.000171 | 0.000234 | 0.070655 | 0        | 0.002072 | 0.003617 | 0        | 0        | 0.001194 | 0.000461 | 0.000162 | 5.37E-05 |
| 0        | 0        | 0.000255 | 0        | 0        | 0.008462 | 0        | 0.00038  | 0.00013  | 0.000278 | 0        | 6.68E-05 | 0        | 0        | 0        |
| 0        | 0        | 0.001488 | 0        | 0.000368 | 0.000151 | 0.00132  | 0.004235 | 0.007628 | 0.002002 | 0        | 0        | 0        | 0.000705 | 5.83E-05 |
| 0.000359 | 0        | 0.001018 | 4.14E-05 | 0        | 0.000432 | 0        | 0.001381 | 0.003929 | 0.002006 | 0        | 0        | 0        | 0.000296 | 0.00035  |
| 0.000806 | 0        | 0.00893  | 9.24E-05 | 0.000129 | 0.002329 | 0        | 0.031326 | 0.086603 | 0.029159 | 0.004024 | 0.000135 | 0.004128 | 0.014365 | 0.001995 |
| 0        | 0.000353 | 0.006605 | 0.016082 | 0.130091 | 0.007889 | 0.005767 | 0.002205 | 0.014194 | 0.000882 | 0.00209  | 0.004927 | 0.001632 | 0.002333 | 0.002338 |
| 0        | 0        | 0.001494 | 4.87E-05 | 4.82E-05 | 0.000357 | 0        | 0        | 0.000605 | 0.0002   | 0        | 0.000111 | 0        | 0        | 0.000135 |
| 0.002949 | 0        | 0.030663 | 0.00118  | 0.002849 | 0.01301  | 0.004174 | 0.000691 | 0.042024 | 0.008248 | 0.0024   | 0.004151 | 0.003525 | 0.001621 | 0.014867 |
| 0.000218 | 0        | 0.007561 | 0.000264 | 0.016916 | 0.003152 | 0.000112 | 0        | 0.010279 | 0.004573 | 0.000251 | 0.000542 | 0        | 0.000656 | 0.000947 |
| 0        | 0        | 0        | 0        | 0        | 0        | 0        | 0        | 0.000144 | 0        | 0        | 0        | 0        | 0        | 0        |
| 0        | 0        | 0        | 0        | 0        | 0        | 0        | 0.000176 | 0.001225 | 0        | 0        | 0        | 0        | 0.000254 | 0        |
| 0.003196 | 7.13E-05 | 0.005695 | 0        | 0        | 0.000371 | 0        | 0.033813 | 0.005735 | 0.001508 | 0.04649  | 0        | 0.051416 | 0.007521 | 0        |
| 0.007823 | 0.000543 | 0.003158 | 4.62E-05 | 6.54E-05 | 0.000422 | 0.002291 | 0.005094 | 0.002752 | 0.003526 | 0.005111 | 0.000316 | 0.011497 | 0.014781 | 0.002254 |
| 0.004256 | 0.001164 | 0.004299 | 8.39E-05 | 0.000444 | 8.44E-05 | 0.014446 | 0.00415  | 0.006307 | 0.00525  | 0.007822 | 0.000617 | 0.011461 | 0.01414  | 0.000651 |
| 0.000241 | 0.000282 | 0.000766 | 0        | 0.006212 | 0.000151 | 0.000674 | 0.002015 | 0.003924 | 0.000239 | 0.011787 | 0.000584 | 0.00246  | 0.005103 | 0.000478 |

|          |          |          |          |          |          |          |          |          |          |          |          |          |          |          |
|----------|----------|----------|----------|----------|----------|----------|----------|----------|----------|----------|----------|----------|----------|----------|
| 0.005033 | 0.02968  | 0.011962 | 0.000406 | 0.004161 | 0.00117  | 0.008532 | 0.007976 | 0.020789 | 0.018263 | 0.016528 | 0.001554 | 0.034798 | 0.04232  | 0.000712 |
| 0.001077 | 0.027887 | 0.002669 | 0.000285 | 0.006547 | 0.000287 | 0.009288 | 0.004967 | 0.011355 | 0.003111 | 0.012969 | 0.001113 | 0.009498 | 0.010312 | 0.000355 |
| 0.004656 | 0.02368  | 0.003382 | 0.000348 | 0.012669 | 0.000599 | 0.006141 | 0.012288 | 0.030818 | 0.006959 | 0.008144 | 0.000572 | 0.014856 | 0.026278 | 0.000581 |
| 0.002549 | 0.004341 | 0.001728 | 4.01E-05 | 0.002508 | 0.000134 | 0.002457 | 0.002706 | 0.009683 | 0.002147 | 0.007571 | 0.000135 | 0.003631 | 0.003912 | 0.000222 |
| 0        | 0        | 0.011177 | 0.008814 | 0.068664 | 0.00161  | 0        | 0.017079 | 0.020246 | 0        | 0        | 0        | 0.000189 | 0        | 0        |
| 0        | 0.00098  | 0.001012 | 0.000559 | 0.000965 | 0.000939 | 0        | 0.000613 | 0.000399 | 0.0002   | 0.000358 | 0.000507 | 0.000473 | 0.000148 | 0.00014  |
| 0.001925 | 0.000724 | 0.001009 | 4.50E-05 | 0.00123  | 0.000516 | 0.002208 | 0.003093 | 0.007844 | 0.001438 | 0.002985 | 7.16E-05 | 0.002768 | 0.004765 | 0.00032  |
| 0.005639 | 0.012499 | 0.019474 | 0.011434 | 0.024817 | 0.005092 | 0.020202 | 0.008737 | 0.031437 | 0.007742 | 0.010987 | 0.002161 | 0.014891 | 0.019581 | 0.008064 |
| 0.001101 | 0        | 0.003825 | 4.26E-05 | 0.00069  | 0.001108 | 0.00038  | 0.000634 | 0.003084 | 0.000603 | 0.006019 | 0.000658 | 0.002508 | 0.005653 | 0        |
| 0.012125 | 0.000264 | 0.041401 | 0.002267 | 0.004639 | 0.003242 | 0.00174  | 0.028184 | 0.060646 | 0.019822 | 0.073192 | 0.008975 | 0.030551 | 0.03475  | 0.025241 |
| 0.007004 | 0        | 0.049448 | 0.001035 | 0.004027 | 0.005294 | 0.001474 | 0.291645 | 0.071641 | 0.01724  | 0.076046 | 0.000585 | 0.06445  | 0.046303 | 3.97E-05 |
| 0.000306 | 0.01589  | 0.004308 | 0.004515 | 0.012141 | 0.002019 | 0.01593  | 0.001614 | 0.001076 | 0.007915 | 0.007691 | 0.004394 | 0.002862 | 0.001459 | 0.003808 |
| 0.000306 | 0        | 0.001783 | 0.000103 | 0.000134 | 0        | 9.98E-05 | 0.000789 | 0.002017 | 0.00161  | 0.005171 | 0.000588 | 0.0011   | 0.003736 | 0.000621 |
| 0.000936 | 8.91E-05 | 0.002033 | 0        | 0.000248 | 0        | 7.48E-05 | 0.000218 | 0.00159  | 0.001081 | 0.007691 | 0.000426 | 0.004128 | 0.002827 | 0.000814 |
| 0.000306 | 0.003328 | 0.000105 | 5.35E-05 | 5.16E-05 | 6.68E-05 | 0.000805 | 0.000493 | 0        | 0.001109 | 0.005696 | 0.000137 | 0.001337 | 0.00117  | 5.83E-05 |
| 0.015622 | 0.105866 | 0.009828 | 3.65E-05 | 0.002202 | 0.000393 | 0.008195 | 0.008018 | 0.001508 | 0.013337 | 0.068319 | 0.000735 | 0.164455 | 0.02933  | 0        |
| 0.011743 | 0.040033 | 0.011058 | 0.001191 | 0.027981 | 0        | 0.031723 | 0.042776 | 0.004395 | 0.002856 | 0.11955  | 0.00014  | 0.072931 | 0.096645 | 0.004938 |
| 0.000224 | 0.007948 | 0.000624 | 3.89E-05 | 0.000396 | 0        | 0.000886 | 0        | 0.000163 | 0.000619 | 0.00031  | 7.32E-05 | 0.001431 | 0.0027   | 0.000119 |
| 0.000306 | 0.274641 | 0.005061 | 0.010561 | 0.018595 | 0.000297 | 0.0049   | 0.000338 | 0.000279 | 0.015739 | 0.000621 | 0        | 0.008563 | 0.015507 | 0.004826 |
| 0.009047 | 0.231493 | 0.023471 | 0.023011 | 0.04824  | 0.018165 | 0.007234 | 0.017509 | 0.006633 | 0.032685 | 0.021436 | 0.01477  | 0.029652 | 0.038324 | 0.012442 |
| 0.003626 | 0.034656 | 0.009262 | 0.011118 | 0.032957 | 0.001333 | 0.012521 | 0.053866 | 0.005164 | 0.020786 | 0.252965 | 0.016166 | 0.012786 | 0.027448 | 0.013915 |
| 0        | 0.001805 | 0.000381 | 3.77E-05 | 0        | 0        | 0        | 0.000254 | 0        | 0.000188 | 0        | 0.00028  | 0.000118 | 0.00117  | 0.000112 |

| HC125    | HC116    | HC057    | HC021    | HC055    | HC025    | HC024    | HC023    | HC022    | HC149    | HC020    | HC019    | HC018    | HC017    | HC016    |
|----------|----------|----------|----------|----------|----------|----------|----------|----------|----------|----------|----------|----------|----------|----------|
| 0.012619 | 0.001776 | 0.027903 | 0.015671 | 0.012003 | 0.017921 | 0.00193  | 0.026754 | 0.018889 | 0.054874 | 0.016622 | 0.110989 | 0.01319  | 0.028007 | 0.013954 |
| 0        | 6.15E-05 | 0        | 0.000125 | 0.003754 | 0        | 0        | 5.66E-05 | 5.07E-05 | 0        | 0        | 0.00019  | 0        | 0        | 0        |
| 0.000317 | 0.0002   | 0.00075  | 0.002514 | 0.03417  | 0.000703 | 0        | 0.000682 | 0.000546 | 0        | 0        | 0.001281 | 0        | 0.000152 | 0.002019 |
| 0.002914 | 0.000481 | 0.001552 | 0.000359 | 0.000261 | 0.000398 | 6.46E-05 | 8.62E-05 | 0.001075 | 0.001944 | 0.00201  | 0.004459 | 0        | 0        | 0.000231 |
| 0.004173 | 0.000407 | 0.006043 | 0.001399 | 0.000876 | 0.00279  | 0.000143 | 0.000709 | 0.002321 | 0.004009 | 0.006392 | 0.007919 | 0        | 0.000141 | 0.000625 |
| 0.001015 | 0.000152 | 0.001624 | 0.000596 | 0.000558 | 0.000964 | 0.000428 | 0        | 0.001661 | 0.000891 | 0.00612  | 0.000621 | 0        | 2.30E-05 | 0.000483 |
| 0.011001 | 0.000715 | 0.002871 | 0.004281 | 0.000762 | 0.002864 | 0.00207  | 0.000108 | 0.006314 | 0.00229  | 0.019419 | 0.004919 | 5.62E-05 | 0.000786 | 0.004069 |
| 0.028375 | 0.004282 | 0.018296 | 0.00862  | 0.050932 | 0.036255 | 0.004575 | 0.002457 | 0.010991 | 0.011647 | 0.023044 | 0.269439 | 0.10716  | 0.017678 | 0.031566 |
| 0.00321  | 0        | 0.000461 | 0.000177 | 0.001789 | 0        | 6.69E-05 | 0.000571 | 0.000195 | 0.001071 | 0.000343 | 0.004442 | 0.001325 | 0        | 0.000374 |
| 0.001745 | 0        | 0.000686 | 0.000929 | 0.001944 | 0.000116 | 0.002913 | 0.002423 | 0.001167 | 0.00378  | 0.002605 | 0.001063 | 0.00011  | 0.000781 | 0.000537 |
| 0.002417 | 3.08E-05 | 0.000365 | 0.000411 | 0.000375 | 0.000722 | 0.003138 | 0.00046  | 0.001142 | 0.001535 | 0.002636 | 0.000471 | 0        | 0.001129 | 0.000265 |
| 0.000127 | 5.46E-05 | 0.000714 | 0.004575 | 0.00218  | 0.001531 | 0.003909 | 0.00244  | 0.004802 | 0.003221 | 0.006231 | 0        | 0        | 0.002788 | 0.000727 |
| 0.076007 | 0.009315 | 0.086135 | 0.505353 | 0.053582 | 0.071467 | 0.425875 | 0.048083 | 0.242188 | 0.113231 | 0.334963 | 0.122885 | 0.005809 | 0.188819 | 0.135933 |
| 0.006987 | 0.000448 | 0.007458 | 0.016693 | 0.007613 | 0.00563  | 0.047066 | 0.003381 | 0.022415 | 0.010046 | 0.039828 | 0.004183 | 0.000329 | 0.015491 | 0.007343 |
| 0        | 0.000585 | 0.000922 | 0.003089 | 0.000538 | 0.001478 | 0.00037  | 0.000167 | 0.000185 | 0        | 0.000707 | 0.000552 | 0.00085  | 0.001479 | 0.002685 |
| 0.007034 | 0.074329 | 0.130617 | 0.346945 | 0.181722 | 0.226469 | 0.039161 | 0.033077 | 0.064587 | 0.094405 | 0.170279 | 0.030135 | 0.138171 | 0.198622 | 0.405167 |
| 0.000545 | 0.001921 | 0.001271 | 0.001983 | 0.006676 | 0.004558 | 0.000138 | 0.000963 | 0.000125 | 0.000191 | 0.002615 | 0.001373 | 0.010168 | 0.00189  | 0.003301 |
| 0.000365 | 0.0004   | 0.000112 | 0.000515 | 0.000872 | 0.000777 | 0.000296 | 0.000276 | 0.000143 | 0.000666 | 0.00106  | 0        | 0.001926 | 0.000565 | 0.001084 |
| 0.024308 | 0.002276 | 0.025333 | 0.024671 | 0.06009  | 0.036037 | 0.061661 | 0.007466 | 0.012716 | 0.009847 | 0.012896 | 0.17912  | 0.039004 | 0.014553 | 0.02368  |
| 0.000709 | 0.000448 | 0.000176 | 0        | 0.000929 | 7.90E-05 | 0.003124 | 0.000367 | 0.001071 | 0        | 0.000293 | 0.000511 | 0.008659 | 0.001019 | 0.000391 |
| 0        | 0.000695 | 0.004423 | 0.006783 | 0.012039 | 0.005203 | 0.022605 | 0.005031 | 0.006895 | 0.001086 | 0.004817 | 0.000822 | 4.97E-05 | 0.000746 | 0.001591 |
| 0        | 0.000217 | 0.006993 | 0.001793 | 0.022387 | 0.001141 | 0        | 0.00115  | 0.001172 | 0        | 0.009614 | 0        | 0.031541 | 0.000693 | 0.052329 |
| 0.000762 | 0.85893  | 0.405217 | 0.004217 | 0.006313 | 0.247206 | 0.000241 | 0.129736 | 0.395603 | 0.004465 | 0.015642 | 0.008258 | 0.001959 | 0.11551  | 0.019142 |
| 0        | 0.000768 | 0.000962 | 2.20E-05 | 0.000265 | 0.000364 | 0        | 0.001485 | 0.002685 | 0        | 0        | 0.000161 | 0        | 0.000311 | 0        |
| 0.000159 | 0.009134 | 0.010265 | 0.003078 | 0.000489 | 0.003849 | 0.001228 | 0.000685 | 0.010166 | 0.008798 | 0.037    | 0.001655 | 0        | 0.000869 | 0.005099 |
| 0        | 0.003164 | 0.011556 | 0.00052  | 0.0013   | 0.012517 | 5.57E-05 | 0.008852 | 0.014018 | 0.004237 | 0.008018 | 0.00031  | 4.97E-05 | 0.005601 | 0.007755 |
| 0        | 0.001646 | 0.007763 | 0.001314 | 0.000994 | 0.007195 | 0.000735 | 0.006496 | 0.006763 | 0.001863 | 0.049674 | 0        | 0        | 0.001624 | 0.002726 |
| 0        | 0.001256 | 0.008304 | 0.002803 | 0.003925 | 0.011005 | 0.000524 | 0.005577 | 0.007519 | 0.012943 | 0.019429 | 0.000184 | 0        | 0.006064 | 0.003172 |
| 0        | 0        | 0.000136 | 0        | 0.000383 | 0        | 0        | 9.60E-05 | 0        | 0        | 0.000404 | 0        | 4.97E-05 | 0        | 0        |
| 0        | 0        | 0        | 0        | 0        | 0.000411 | 0        | 0.000163 | 0        | 0.000166 | 0        | 0        | 0        | 0.000102 | 0        |
| 0        | 4.34E-05 | 0.000662 | 0.000129 | 0.000465 | 0.000522 | 6.02E-05 | 0        | 0.000726 | 0.000243 | 0.003676 | 0.000178 | 0        | 9.19E-05 | 0.000248 |
| 0        | 0        | 0.000589 | 0.000102 | 0.00013  | 0.001157 | 0.000401 | 0.000355 | 0.000199 | 0        | 0.000394 | 0        | 0        | 4.06E-05 | 0        |
| 0.000169 | 0.000271 | 0.000626 | 7.57E-05 | 0.00496  | 0.002216 | 0.000961 | 0.000896 | 0.001171 | 0.001487 | 0.001989 | 0        | 0        | 0.000461 | 0.000112 |
| 0.000481 | 0.00045  | 0.015469 | 0.003813 | 0.032637 | 0.031065 | 0.008036 | 0.03911  | 0.012886 | 0.018376 | 0.012037 | 0.000178 | 0.000767 | 0.029162 | 0.005463 |
| 0.002243 | 0.000988 | 0.052021 | 0.012953 | 0.131046 | 0.097758 | 0.037438 | 0.145978 | 0.042071 | 0.070438 | 0.022459 | 0.003172 | 0.003187 | 0.146751 | 0.020005 |
| 0        | 0        | 0        | 0        | 9.37E-05 | 0.000132 | 0        | 0        | 0        | 0.000133 | 0.000343 | 0        | 0        | 8.13E-05 | 0.000241 |
| 0        | 0        | 0        | 0        | 0.000134 | 0.000258 | 0.000123 | 0.000485 | 0        | 0.000401 | 0        | 0        | 0        | 0        | 0        |
| 0.000132 | 0        | 0        | 4.13E-05 | 0.002462 | 0        | 0.000354 | 0.015191 | 0.000175 | 0.003677 | 0.000313 | 0.000195 | 0.000123 | 0.000461 | 0.000119 |
| 0.000153 | 0        | 0.000369 | 0.000149 | 0.001394 | 0        | 0.00066  | 0.004403 | 0.000161 | 0.001314 | 0        | 0        | 0        | 0.000249 | 0        |
| 0.002412 | 0.000213 | 0.000874 | 6.74E-05 | 0.000245 | 0.001257 | 5.79E-05 | 0        | 5.79E-05 | 0.00011  | 0.002333 | 0.00054  | 0        | 0        | 0.000377 |
| 0.000227 | 0.000641 | 0.003508 | 6.19E-05 | 0        | 0.003665 | 7.58E-05 | 0        | 0.000217 | 0        | 0.003201 | 0.000287 | 0        | 4.59E-05 | 0.001455 |
| 0        | 0.00035  | 0.00164  | 0        | 0        | 0.001665 | 6.02E-05 | 0        | 0        | 0        | 0.002212 | 0        | 0        | 0        | 0.00033  |
| 0        | 0        | 0.000389 | 0        | 0.001333 | 0.000656 | 0        | 0        | 5.43E-05 | 0        | 0        | 0.000155 | 0        | 0.000334 | 0.000823 |
| 0        | 0        | 0        | 0        | 0        | 0.000121 | 0        | 0        | 0        | 0.00011  | 0        | 0.000293 | 0        | 0        | 0.000248 |
| 0        | 0        | 0.000108 | 0        | 0        | 0.000126 | 0        | 0        | 0        | 0        | 0        | 0        | 0        | 0        | 0        |
| 0.000175 | 0.000168 | 0.001431 | 0.000605 | 0.002429 | 0.000256 | 0.000542 | 0.002893 | 0.000523 | 0.00328  | 0.001707 | 0.000167 | 0.000493 | 0.000795 | 0.00173  |
| 0.000127 | 0.000243 | 0.000437 | 0.000282 | 0.001341 | 0.000775 | 7.13E-05 | 0.00014  | 0.000541 | 0.0012   | 0.000384 | 0.000293 | 0.000145 | 8.83E-05 | 0.001632 |
| 0.000143 | 0        | 0.000377 | 0.000179 | 0.000118 | 0.002838 | 0.005705 | 0.001399 | 0.001234 | 0        | 0        | 0        | 0.000724 | 0.000887 | 0.005378 |
| 0        | 0        | 0        | 0        | 0        | 0.000477 | 0.000125 | 0        | 0.000203 | 0        | 0        | 0        | 0        | 0        | 0.000105 |
| 0        | 6.29E-05 | 8.42E-05 | 0        | 0.00013  | 0.000282 | 0.000259 | 0.000158 | 6.51E-05 | 9.94E-05 | 0        | 0        | 6.49E-05 | 0.000214 | 0.001237 |
| 0.000132 | 0        | 0        | 3.44E-05 | 0.000558 | 0        | 4.68E-05 | 0.00014  | 0        | 0        | 0        | 0        | 0.00011  | 0.000155 | 0.000653 |
| 0.000148 | 0.000131 | 0.000172 | 0        | 0.000452 | 0.002529 | 0.000201 | 5.91E-05 | 6.51E-05 | 0        | 0.000596 | 0.000408 | 0.000456 | 0.002261 | 0.016477 |
| 0.000249 | 0.000369 | 0.001909 | 0.002105 | 0.000212 | 0.004661 | 0.004653 | 0.001332 | 0.004315 | 0.006718 | 0.004463 | 0.000862 | 0.000158 | 0.011622 | 0.001652 |
| 0        | 0        | 0        | 3.72E-05 | 0.000114 | 0.002809 | 0        | 9.11E-05 | 8.14E-05 | 8.83E-05 | 0        | 0        | 0        | 9.89E-05 | 0.0005   |
| 0        | 0.001472 | 0.002522 | 5.78E-05 | 0.009818 | 0.007633 | 0.004221 | 0.002081 | 0.004364 | 0        | 0.007271 | 0.000626 | 0.000588 | 0.007885 | 0.026977 |
| 0        | 8.95E-05 | 0.000233 | 0        | 0.000607 | 0.002363 | 0.000539 | 0.000143 | 0.000255 | 0.000475 | 0        | 0.000276 | 0        | 0.000876 | 0.007462 |
| 0        | 0        | 0.000233 | 0        | 0        | 0        | 0        | 0        | 0        | 0        | 0        | 0        | 0        | 0        | 0.00035  |
| 0        | 0        | 0        | 0        | 0        | 0        | 0        | 0        | 0        | 0        | 0        | 0        | 0        | 0        | 0        |
| 0.00128  | 0        | 0.000662 | 0        | 0.000982 | 0.003523 | 0        | 0.000766 | 0        | 0.006309 | 0.000969 | 0.006574 | 0.000696 | 0.000451 | 0.003127 |
| 0.014396 | 0.001578 | 0.002117 | 3.30E-05 | 0.01292  | 0.000696 | 0.000669 | 0.000862 | 0.000615 | 0.010624 | 0.002757 | 0.000333 | 0.000515 | 0.000332 | 0.002665 |
| 0.012117 | 0.001431 | 0.001299 | 0.000131 | 0.008669 | 0.000864 | 0.002418 | 0.001633 | 0.001218 | 0.005356 | 0.002333 | 0.000879 | 0.000117 | 0.000742 | 0.001734 |
| 0.002613 | 0.00101  | 0.000441 | 0.000143 | 0.004805 | 0.00259  | 0.000704 | 0.000291 | 0.000814 | 0.002661 | 0.001081 | 0.001563 | 0.00027  | 0.000247 | 0.001356 |

|          |          |          |          |          |          |          |          |          |          |          |          |          |          |          |
|----------|----------|----------|----------|----------|----------|----------|----------|----------|----------|----------|----------|----------|----------|----------|
| 0.038123 | 0.000642 | 0.007863 | 0.00023  | 0.014085 | 0.004065 | 0.007245 | 0.00851  | 0.002529 | 0.01302  | 0.01125  | 0.010717 | 0.0118   | 0.007122 | 0.007829 |
| 0.019289 | 0.000138 | 0.002486 | 0.000312 | 0.003778 | 0.002513 | 0.008054 | 0.002263 | 0.001136 | 0.005772 | 0.002959 | 0.002184 | 0.00328  | 0.004742 | 0.003209 |
| 0.041116 | 0.000221 | 0.0018   | 0        | 0.002152 | 0.001204 | 0.002844 | 0.009182 | 0.000682 | 0.015026 | 0.002191 | 0.000896 | 0.012187 | 0.001986 | 0.006173 |
| 0.006929 | 0.000267 | 0.00231  | 0.000103 | 0.002592 | 0.00166  | 0.001843 | 0.00165  | 0.00072  | 0.001807 | 0.001686 | 0.001529 | 0.011004 | 0.002247 | 0.002291 |
| 0        | 0        | 0.010345 | 0        | 0        | 0.007282 | 6.91E-05 | 0        | 0        | 0        | 0        | 0        | 0        | 0        | 0.008284 |
| 0.000735 | 0        | 0.000285 | 2.48E-05 | 0.000436 | 0.001562 | 0.000617 | 0.000628 | 0.000161 | 0.001318 | 0.000303 | 0        | 0.003502 | 0.007012 | 0.000962 |
| 0.000941 | 0.000196 | 0.001271 | 0.000594 | 0.001365 | 0.002042 | 0.000771 | 0.000158 | 0.00042  | 0.000375 | 0.000889 | 0.001517 | 0.00427  | 0.001    | 0.002658 |
| 0.011562 | 0.001513 | 0.015096 | 0.004593 | 0.013437 | 0.020924 | 0.028374 | 0.001862 | 0.029066 | 0.015299 | 0.004413 | 0.01736  | 0.03223  | 0.010716 | 0.014889 |
| 0.000206 | 0.000136 | 0.002109 | 0.001796 | 0.002849 | 0.001028 | 0        | 0        | 0.000639 | 0.000456 | 0.000343 | 0.013275 | 0.008989 | 0.001127 | 0.008311 |
| 0.009689 | 0.003858 | 0.012097 | 0.001337 | 0.027184 | 0.015339 | 0.008834 | 0.00919  | 0.018331 | 0.031363 | 0.019944 | 0.016993 | 0.014941 | 0.020981 | 0.019087 |
| 0.004131 | 0.004487 | 0.006375 | 0.001208 | 0.03311  | 0.010583 | 0.000134 | 0.001832 | 0.000612 | 0.00106  | 0.003948 | 0.023549 | 0.029532 | 0.006931 | 0.005531 |
| 0.074627 | 0.000155 | 0.008123 | 0.001977 | 0.049327 | 0.006568 | 0.023679 | 0.009815 | 0.011943 | 0.008201 | 0.005534 | 0.00512  | 0.008706 | 0.027078 | 0.012561 |
| 0.001534 | 5.74E-05 | 0.000449 | 7.71E-05 | 0.001956 | 0.000435 | 0.0007   | 0.00066  | 0.000897 | 0.002492 | 0.001121 | 0.001494 | 0.000402 | 0.000597 | 0.000738 |
| 0.002253 | 0.000144 | 0.000489 | 0        | 0.004043 | 0.000148 | 0.001179 | 0.001317 | 0.00144  | 0.001152 | 0.003191 | 0.002827 | 0.000452 | 0.000451 | 0.000272 |
| 0.017898 | 0        | 0.000209 | 0        | 0        | 0.00053  | 6.24E-05 | 0.001032 | 0        | 0.00727  | 0.000293 | 0.000328 | 7.57E-05 | 0.000182 | 0.000381 |
| 0.189212 | 0.000267 | 0.011351 | 0.000158 | 0.007678 | 0.034227 | 0        | 0.002243 | 0.001346 | 0.046017 | 0.003211 | 0.061879 | 0.008827 | 0.002429 | 0.005058 |
| 0.033278 | 0.00163  | 0.006275 | 0.000843 | 0.010018 | 0.004247 | 0.024078 | 0.035168 | 0.004597 | 0.088475 | 0.007089 | 0.00939  | 0.107088 | 0.014772 | 0.012367 |
| 0.007442 | 4.76E-05 | 0.000581 | 0        | 0.001068 | 0.000145 | 0.00113  | 0.009133 | 0.000224 | 0.005698 | 0.000293 | 0.000287 | 0.00123  | 0.000143 | 0.000337 |
| 0.049806 | 0.000166 | 0.007783 | 0.00101  | 0.02392  | 0.000851 | 0.013334 | 0.049775 | 0.001212 | 0.03715  | 0.008311 | 0.019906 | 0.216622 | 0.020344 | 0.010966 |
| 0.146244 | 0.001939 | 0.032682 | 0.004402 | 0.062426 | 0.002764 | 0.11855  | 0.136707 | 0.008091 | 0.122514 | 0.04009  | 0.033577 | 0.143016 | 0.028837 | 0.016511 |
| 0.115764 | 0.00087  | 0.012831 | 0.000898 | 0.049286 | 0.009342 | 0.066884 | 0.200412 | 0.006446 | 0.111055 | 0.01946  | 0.004247 | 0.01266  | 0.03144  | 0.039544 |
| 0.007235 | 6.43E-05 | 0.000112 | 0        | 0.001512 | 0        | 0.000923 | 0.010261 | 8.87E-05 | 0.004171 | 0.000303 | 0        | 0.000365 | 8.48E-05 | 0.000337 |

| HC015    | HC014    | HC013    | HC012    | HC011    | HC010    | HC056    | HC008    | HC007    | HC006    | HC005    | HC004    | HC003    | HC002    | HC001    |
|----------|----------|----------|----------|----------|----------|----------|----------|----------|----------|----------|----------|----------|----------|----------|
| 0.031653 | 0.034007 | 0.000664 | 0.023231 | 0.073027 | 0.020858 | 0.090898 | 0.101893 | 0.139515 | 0.028074 | 0.009775 | 0.046558 | 0.100866 | 0.139653 | 0.040257 |
| 0        | 0        | 0.000147 | 0.000215 | 0.000661 | 0.000106 | 0.000342 | 0.000457 | 0        | 0        | 0        | 0.000905 | 5.48E-05 | 0.000572 | 0.000367 |
| 0.000192 | 0        | 0.000489 | 0        | 0.000828 | 0.004148 | 0.001281 | 0.004105 | 0.000349 | 0.00056  | 0        | 0.00303  | 0.000339 | 0.004444 | 0.005555 |
| 0.001125 | 0.00141  | 0        | 0.00142  | 0.000659 | 0.000814 | 0.001281 | 0.008417 | 0.001248 | 0.000775 | 0.000156 | 0.00342  | 0.000513 | 0.008539 | 0.003109 |
| 0.003645 | 0.002539 | 0        | 0.001005 | 0.001522 | 0.001023 | 0.002344 | 0.009503 | 0.002316 | 0.002688 | 0.000634 | 0.006507 | 0.002533 | 0.021704 | 0.007266 |
| 0.001498 | 0.001257 | 0        | 0        | 0.000555 | 0.001066 | 0.000354 | 0.003182 | 0        | 0.00066  | 5.67E-05 | 0.001213 | 0.000235 | 0.000972 | 0.000256 |
| 0.007713 | 0.003013 | 0        | 0        | 0.001987 | 0.004251 | 0.001065 | 0.010661 | 0.00022  | 0.001906 | 0.000244 | 0.005325 | 0.002256 | 0.007193 | 0.001001 |
| 0.0046   | 0.044389 | 0.021918 | 0.047906 | 0.015162 | 0.022726 | 0.024665 | 0.103633 | 0.027994 | 0.026212 | 0.009464 | 0.029371 | 0.01252  | 0.022852 | 0.021654 |
| 0.000104 | 0.001067 | 0.000346 | 0.001938 | 0.000247 | 7.75E-05 | 0.000481 | 0.002408 | 0.000203 | 0        | 0.000516 | 0.001345 | 0.000842 | 0.002555 | 0.000204 |
| 0.001755 | 0.000903 | 0        | 0.000207 | 0.003108 | 0.00011  | 0.001139 | 0.002009 | 0.000142 | 0.000149 | 0.003304 | 0.002587 | 0.00624  | 0.004645 | 0.000169 |
| 0.001131 | 0.000837 | 0        | 0        | 0.000564 | 0.000423 | 0.000846 | 0.00063  | 0        | 0.000212 | 0.002669 | 0.002203 | 0.004056 | 0.001939 | 0.000541 |
| 0.007462 | 0.00089  | 0        | 0.000207 | 0.001824 | 0.001899 | 0.001312 | 0.00124  | 9.15E-05 | 0.00112  | 0.013214 | 0.002062 | 0.004601 | 0.000435 | 0        |
| 0.32543  | 0.090782 | 0.005645 | 0.011396 | 0.320243 | 0.230815 | 0.145233 | 0.211396 | 0.013178 | 0.094379 | 0.126261 | 0.160811 | 0.356113 | 0.104877 | 0.012047 |
| 0.0186   | 0.010345 | 0.001035 | 0.002369 | 0.013119 | 0.044581 | 0.008758 | 0.012805 | 0.001027 | 0.012784 | 0.014115 | 0.008091 | 0.027284 | 0.006052 | 0.000926 |
| 0        | 0.002213 | 0.000163 | 0        | 0.000703 | 0.001077 | 0.001127 | 0.001303 | 0.000363 | 0.000504 | 0.000165 | 0.000223 | 0.000358 | 0.000604 | 0        |
| 0.075248 | 0.322728 | 0.066438 | 0.02481  | 0.163773 | 0.130631 | 0.168967 | 0.156061 | 0.084476 | 0.103026 | 0.024641 | 0.031637 | 0.081536 | 0.047097 | 0.007639 |
| 0.008403 | 0.004777 | 0.00969  | 0.007026 | 0.00192  | 0.003206 | 0.00327  | 0.009762 | 0.014378 | 0.001295 | 0.000249 | 0.000273 | 0.000689 | 0.001321 | 0.000757 |
| 0.002355 | 0.001982 | 0.001756 | 0.001037 | 0.000655 | 0.000462 | 0.000198 | 0.000654 | 0.000824 | 0.000562 | 0.000308 | 0.00016  | 0.000329 | 0.000266 | 0.000367 |
| 0.011117 | 0.032787 | 0.00466  | 0.0204   | 0.011385 | 0.045442 | 0.033181 | 0.038416 | 0.018091 | 0.015906 | 0.030137 | 0.040262 | 0.015291 | 0.022104 | 0.023884 |
| 0.000635 | 0.00183  | 0.001275 | 0.000702 | 0        | 0.004133 | 0.000357 | 0.000423 | 0.002014 | 0        | 0        | 0        | 0.000274 | 0        | 0        |
| 0.003091 | 0.005111 | 0.000819 | 0.000917 | 0.00161  | 0.004495 | 0.001117 | 0.000817 | 0.002621 | 0.003883 | 5.50E-05 | 0.000588 | 0.003326 | 0.000306 | 0.001234 |
| 0.000356 | 0.000144 | 0.000481 | 0        | 0.012576 | 0.018208 | 0.010933 | 0.015656 | 0.000312 | 0.00924  | 0        | 0.000129 | 0.004863 | 0.003274 | 0.000344 |
| 0.091688 | 0.054405 | 0.001637 | 0.048361 | 0.116964 | 0.011675 | 0.021119 | 0.013046 | 0.107931 | 0.512803 | 0.015612 | 0.075788 | 0.044628 | 0.001389 | 0.005176 |
| 0.000556 | 0.000305 | 0        | 0.000359 | 0.000201 | 0        | 4.64E-05 | 0.000356 | 0.00018  | 0.001013 | 0.000339 | 0.000707 | 0.001197 | 0.000295 | 0.000175 |
| 0.003661 | 0.010263 | 0        | 0.000343 | 0.003426 | 0.001483 | 0.002998 | 0.003341 | 0.000125 | 0.005091 | 0.000694 | 0.001201 | 0.00083  | 0.000133 | 0        |
| 0.004406 | 0.00232  | 0        | 0.000782 | 0.002302 | 0.000495 | 0.000992 | 0.000846 | 0.002573 | 0.006347 | 0.003157 | 0.002408 | 0.003095 | 0.000237 | 0.000198 |
| 0.013053 | 0.005251 | 0        | 0.000502 | 0.003962 | 0.001343 | 0.001884 | 0.000836 | 0        | 0.00675  | 0.002888 | 0.001037 | 0.001393 | 0.000407 | 0.000198 |
| 0.018987 | 0.00788  | 0        | 0.00063  | 0.003506 | 0.002235 | 0.00316  | 0.001067 | 0.002855 | 0.004767 | 0.004369 | 0.001946 | 0.00134  | 0.001303 | 0.000175 |
| 0.000107 | 0.000148 | 0        | 0.000622 | 0.000123 | 0.000561 | 0        | 0.00113  | 0.001024 | 0.000441 | 5.67E-05 | 0.000113 | 6.66E-05 | 0        | 0        |
| 0        | 0.000136 | 0        | 0        | 0        | 6.34E-05 | 0        | 0.000245 | 0.000115 | 0        | 0.000235 | 0        | 8.23E-05 | 0        | 0        |
| 0.001547 | 0.001117 | 0        | 0        | 0.000221 | 7.28E-05 | 4.89E-05 | 0.000336 | 0.000122 | 0.000343 | 0.000117 | 0.000226 | 0.000116 | 0.001051 | 0.000565 |
| 0.000638 | 0.001381 | 0.000143 | 0.000861 | 0        | 0.000589 | 0.000112 | 0.000399 | 0.000115 | 0.000254 | 0.000155 | 0.000273 | 0.000202 | 0.001299 | 0.000151 |
| 0.001706 | 0.000701 | 0        | 0.000439 | 0.000158 | 0.000516 | 6.11E-05 | 0.000596 | 0.000244 | 0.000544 | 0.003214 | 0.000515 | 0.001643 | 0.000158 | 0.000617 |
| 0.054038 | 0.014693 | 0.001092 | 0.021445 | 0.011079 | 0.031164 | 0.016605 | 0.005388 | 0.02715  | 0.009053 | 0.064092 | 0.015258 | 0.008687 | 0.00326  | 0.003563 |
| 0.158357 | 0.039023 | 0.002314 | 0.060212 | 0.031999 | 0.106957 | 0.054606 | 0.015108 | 0.162281 | 0.028891 | 0.235293 | 0.056696 | 0.035901 | 0.015148 | 0.012303 |
| 0        | 0        | 0        | 0        | 3.72E-05 | 0.000129 | 4.40E-05 | 0        | 0        | 0.000254 | 7.05E-05 | 0.000248 | 0.000157 | 0        | 0        |
| 0        | 0        | 0        | 0        | 0        | 0        | 4.89E-05 | 0        | 0.000112 | 0.000212 | 0.000368 | 0.000387 | 0.000198 | 0        | 0.000402 |
| 0.000323 | 0.00026  | 0        | 0.000447 | 0.00045  | 0        | 0.000161 | 0.000461 | 0.000329 | 0        | 0.00308  | 0.001179 | 0.001587 | 0.001166 | 0.000541 |
| 0.000873 | 0.000198 | 0        | 0.000574 | 0.000532 | 0        | 0.000213 | 0.000226 | 0.000254 | 0        | 0.004024 | 0.001009 | 0.001197 | 0.000817 | 0.000367 |
| 0.000405 | 0.000783 | 0        | 0        | 4.84E-05 | 7.04E-05 | 0        | 0.000836 | 0.000671 | 0.000212 | 0        | 0.000248 | 5.09E-05 | 0.00113  | 0        |
| 9.31E-05 | 0.002448 | 0.000155 | 0.000199 | 0        | 0.00034  | 0.000105 | 0.001918 | 0.000105 | 0.001517 | 0        | 0.000761 | 0        | 0.000122 | 0.000413 |
| 0        | 0.000445 | 0        | 0        | 0        | 0.000376 | 0        | 0.000707 | 0        | 0.000847 | 0        | 0.000622 | 0        | 0.000166 | 0.00021  |
| 0.000107 | 0.000412 | 0        | 0.001467 | 0.000201 | 0.000117 | 0        | 0.000591 | 0.000356 | 0.000117 | 0.00103  | 0.000226 | 0        | 0.00027  | 0.000157 |
| 0        | 0.000243 | 0        | 0.000415 | 0        | 0.000106 | 0        | 0        | 0        | 0        | 0        | 0        | 0        | 0.000122 | 0        |
| 0        | 0        | 0        | 0        | 0        | 7.28E-05 | 0        | 0        | 0        | 0        | 0        | 0.000154 | 0.000184 | 0        | 0        |
| 0.000589 | 0.002642 | 0.000497 | 0        | 0.001543 | 0.000204 | 0.000853 | 0.001663 | 0.000285 | 0.000103 | 0.001165 | 0.001037 | 0.002952 | 0.002116 | 0.000413 |
| 0        | 0.001636 | 0        | 0        | 0.000718 | 0.000559 | 0.000327 | 0.000471 | 0.000393 | 0.000642 | 0.000658 | 0.000666 | 0.000515 | 0.001267 | 0.000349 |
| 0.000679 | 0.000824 | 0.001149 | 0        | 0.000132 | 0.000969 | 0        | 0        | 0        | 0.005248 | 0.000141 | 0        | 0.000212 | 0.000169 | 0.000186 |
| 0.000255 | 0.000148 | 0        | 0        | 4.47E-05 | 0        | 0        | 9.61E-05 | 0        | 0.000138 | 0        | 0        | 0        | 0        | 0        |
| 0        | 0.000598 | 0.00053  | 0.001451 | 0.000255 | 0.000641 | 3.67E-05 | 0.000139 | 0        | 0.000266 | 6.36E-05 | 0.001235 | 0.000178 | 0.000378 | 0.000646 |
| 0        | 0.000375 | 0.006142 | 0.001196 | 0.000156 | 0.00038  | 0.000178 | 0.00024  | 0.000112 | 0        | 5.50E-05 | 0        | 0.000108 | 0        | 0        |
| 0.000216 | 0.001966 | 0.001837 | 0.017298 | 0.000138 | 0.000603 | 0.000885 | 0.001841 | 0.000132 | 0.002312 | 0        | 0.000748 | 0.000266 | 0.00054  | 0        |
| 0.002749 | 0.006553 | 0.000456 | 0.0013   | 0.001308 | 0.019003 | 0.005599 | 0.000428 | 0.000431 | 0.001694 | 5.16E-05 | 0.002395 | 0.007782 | 0.000533 | 0.000774 |
| 0        | 0.000218 | 0.004688 | 0.000191 | 0.000134 | 0.001622 | 4.15E-05 | 0        | 0.000119 | 0.000222 | 0        | 0.000135 | 0        | 0        | 0        |
| 0.003842 | 0.009261 | 0.008643 | 0.000367 | 0.008218 | 0.043698 | 0.008067 | 0.001327 | 0.005462 | 0.010341 | 0.000583 | 0.006387 | 0.000208 | 0.001889 | 0.001019 |
| 0.000507 | 0.001702 | 0.001584 | 0.000662 | 0.000929 | 0.010128 | 0.001559 | 0.000139 | 9.83E-05 | 0.001118 | 6.02E-05 | 0.001053 | 0        | 0.000417 | 0        |
| 0        | 9.07E-05 | 0.000301 | 0.000502 | 0        | 0        | 0        | 0        | 0.000102 | 0        | 0        | 0        | 0        | 0        | 0.000198 |
| 0        | 0        | 0        | 0.000423 | 0        | 0        | 0        | 0        | 8.14E-05 | 0.000126 | 0        | 0        | 0        | 0        | 0.000658 |
| 0.000214 | 0.004394 | 0.015006 | 0.119737 | 9.30E-05 | 0.000697 | 0.003817 | 0.010022 | 0.009432 | 0.000292 | 0        | 0.004294 | 0        | 0.005969 | 0.004169 |
| 0.000986 | 0.003569 | 0.005193 | 0.006555 | 0.000573 | 0.00023  | 0.00031  | 0.006561 | 0.001112 | 0.001724 | 0.000823 | 0.004963 | 0.001485 | 0.006981 | 0.013235 |
| 0.000438 | 0.003652 | 0.005584 | 0.005678 | 0.000689 | 0.001521 | 0.000643 | 0.001605 | 0.00199  | 0.001073 | 0.001726 | 0.006249 | 0.00352  | 0.004419 | 0.023575 |
| 0.000101 | 0.002135 | 0.004285 | 0.011955 | 0.000685 | 0.001552 | 0.000518 | 0.000399 | 0.001343 | 0.001031 | 0.000679 | 0.007688 | 0.000556 | 0.000288 | 0.032041 |

|          |          |          |          |          |          |          |          |          |          |          |          |          |          |          |
|----------|----------|----------|----------|----------|----------|----------|----------|----------|----------|----------|----------|----------|----------|----------|
| 0.001769 | 0.009904 | 0.024565 | 0.029819 | 0.005337 | 0.004084 | 0.006102 | 0.00535  | 0.008333 | 0.012096 | 0.010698 | 0.029374 | 0.010177 | 0.017023 | 0.086388 |
| 0.001339 | 0.003767 | 0.008525 | 0.005917 | 0.003087 | 0.005352 | 0.0023   | 0.001077 | 0.008713 | 0.001769 | 0.003848 | 0.005997 | 0.009527 | 0.010222 | 0.041881 |
| 0.001413 | 0.008425 | 0.028244 | 0.01162  | 0.002118 | 0.000768 | 0.002446 | 0.003663 | 0.009439 | 0.002471 | 0.014893 | 0.009546 | 0.008336 | 0.046913 | 0.033555 |
| 0.001057 | 0.003586 | 0.030158 | 0.008254 | 0.000646 | 0.001885 | 0.000428 | 0.000639 | 0.003553 | 0.001412 | 0.001695 | 0.006764 | 0.00142  | 0.003361 | 0.031185 |
| 0.010873 | 0.015567 | 0.166895 | 0.042579 | 0.015616 | 0.066086 | 0.076094 | 0        | 0.001166 | 0.006183 | 0        | 0        | 0        | 0        | 0.000192 |
| 0.001446 | 0.005544 | 0.000143 | 0.000606 | 0.000631 | 0.000962 | 0.0012   | 0.000216 | 0.001305 | 0.000833 | 0.00089  | 0.000123 | 0.000274 | 0.000738 | 0.000215 |
| 0.00037  | 0.001781 | 0.008232 | 0.00638  | 0.000268 | 0.00142  | 0.002969 | 0.001937 | 0.001621 | 0.00042  | 0.000756 | 0.001166 | 0.000153 | 0.0009   | 0.000978 |
| 0.002965 | 0.018976 | 0.030239 | 0.019371 | 0.011504 | 0.0292   | 0.03975  | 0.021616 | 0.013883 | 0.003939 | 0.009948 | 0.019778 | 0.003933 | 0.0067   | 0.010556 |
| 0.001095 | 0.009776 | 0.00391  | 0.003796 | 0.000729 | 0.000685 | 0.002788 | 0.007561 | 0.002763 | 0.001766 | 0.00182  | 0.001644 | 0.000241 | 0.002436 | 0.00152  |
| 0.006657 | 0.020806 | 0.042683 | 0.044836 | 0.007951 | 0.015022 | 0.02847  | 0.035051 | 0.027397 | 0.013552 | 0.006549 | 0.055457 | 0.005263 | 0.03016  | 0.019831 |
| 0.003946 | 0.02231  | 0.054992 | 0.030672 | 0.010564 | 0.022977 | 0.019074 | 0.019785 | 0.00255  | 0.009118 | 0.009739 | 0.055608 | 0.003422 | 0.034348 | 0.043488 |
| 0.002998 | 0.007687 | 0.007173 | 0.005479 | 0.010471 | 0.01252  | 0.002036 | 0.00399  | 0.01587  | 0.002261 | 0.017683 | 0.007619 | 0.013932 | 0.00593  | 0.018265 |
| 0.000663 | 0.000779 | 0.001242 | 0.001228 | 0.000262 | 0.000296 | 0.000863 | 0.003547 | 0.000424 | 0.000469 | 0.000909 | 0.002851 | 0.000809 | 0.001403 | 0.002585 |
| 0.000767 | 0.000445 | 0.000676 | 0.001156 | 0.000158 | 0.000183 | 0.000692 | 0.004773 | 0.000376 | 0        | 0.000576 | 0.003109 | 0.000539 | 0.005109 | 0.006795 |
| 0.000657 | 0.000284 | 0.001613 | 0.001802 | 4.84E-05 | 0        | 0.000178 | 0.001086 | 0.002133 | 0.000124 | 0.004596 | 0.000968 | 0.002421 | 0.000831 | 0.006015 |
| 0.027042 | 0.00692  | 0.175262 | 0.171025 | 0.002378 | 0.009621 | 0.006266 | 0.043208 | 0.105408 | 0.001699 | 0.083166 | 0.019906 | 0.039221 | 0.031779 | 0.151652 |
| 0.004225 | 0.024783 | 0.07199  | 0.064909 | 0.014323 | 0.006115 | 0.034171 | 0.010753 | 0.019969 | 0.017894 | 0.120952 | 0.080786 | 0.017121 | 0.102077 | 0.029229 |
| 0.000112 | 0.000256 | 0.001165 | 0.001148 | 0.000607 | 0.000113 | 0.000393 | 0.000942 | 0.000217 | 0        | 0.011997 | 0.002398 | 0.003122 | 0.010035 | 0.001514 |
| 0.011651 | 0.009719 | 0.016945 | 0.014682 | 0.021262 | 0.000887 | 0.030312 | 0.009392 | 0.002417 | 0.000112 | 0.034491 | 0.001191 | 0.032884 | 0.039206 | 0.002591 |
| 0.020473 | 0.063551 | 0.068809 | 0.042164 | 0.048036 | 0.022423 | 0.02716  | 0.041415 | 0.051356 | 0.004431 | 0.065215 | 0.122318 | 0.065059 | 0.172638 | 0.195298 |
| 0.030824 | 0.019944 | 0.079778 | 0.042794 | 0.026761 | 0.018675 | 0.091993 | 0.015939 | 0.08387  | 0.009643 | 0.018147 | 0.028139 | 0.035023 | 0.022039 | 0.085585 |
| 0.000424 | 0        | 0        | 0        | 0.00029  | 0        | 0.000127 | 0.000264 | 0.000241 | 8.87E-05 | 0.000669 | 0.000701 | 0.001669 | 0.00131  | 0.000629 |

| HC026    | HC027    | HC009    | HC029    | HC028    | HC054    | HC053    | HC052    | HC051    | HC050    | HC049    | HC048    | HC047    | HC046    | HC045    |
|----------|----------|----------|----------|----------|----------|----------|----------|----------|----------|----------|----------|----------|----------|----------|
| 0.041395 | 0.002699 | 0.004332 | 0.074695 | 0.02456  | 0.009346 | 0.03584  | 0.071402 | 0.014548 | 0.08638  | 0.025171 | 0.007668 | 0.002132 | 0.008635 | 0.01564  |
| 0        | 0        | 0.0008   | 0        | 0.000202 | 0        | 0.000759 | 0        | 0.001573 | 7.95E-05 | 0        | 0.000282 | 0        | 0        | 0.000391 |
| 0.000268 | 8.69E-05 | 0.014799 | 0.000794 | 0.002319 | 0        | 0.010208 | 0.00056  | 0.001739 | 5.62E-05 | 0        | 0.004612 | 0.000137 | 0.000123 | 0.012148 |
| 0.002002 | 9.93E-05 | 0.001078 | 0.000355 | 0.000759 | 5.29E-05 | 0        | 0.003606 | 0.000961 | 0.005959 | 0.003378 | 0.00074  | 0.000173 | 6.15E-05 | 0.002013 |
| 0.003698 | 0.000504 | 0.000533 | 0.000254 | 0.001774 | 0.000152 | 0.000315 | 0.008422 | 0.001514 | 0.013044 | 0.006129 | 0.001553 | 0.000147 | 0.000346 | 0.006439 |
| 0.002417 | 0.000253 | 0.000261 | 0.000105 | 0.000806 | 3.28E-05 | 0        | 0        | 0.000489 | 0.000852 | 0.000189 | 0.001304 | 0        | 0.000358 | 0.001045 |
| 0.007396 | 0.002601 | 0.002005 | 0.000359 | 0.002675 | 2.52E-05 | 0.000199 | 0.000475 | 0.002547 | 0.004663 | 0.000133 | 0.005397 | 0.000695 | 0.001393 | 0.001809 |
| 0.00973  | 0.007598 | 0.012323 | 0.081893 | 0.009521 | 0.004627 | 0.002017 | 0.018096 | 0.02638  | 0.019136 | 0.060963 | 0.010815 | 0.002848 | 0.010811 | 0.055151 |
| 0.000322 | 0.000178 | 0.00082  | 0.000145 | 0.000154 | 0.000194 | 0.000136 | 0.000217 | 0.000397 | 0.000323 | 0.002296 | 0.000311 | 0.000168 | 0.000292 | 0.001682 |
| 0.001636 | 0.000244 | 0.001143 | 0        | 0.000391 | 0.000287 | 0.00068  | 0.000377 | 0.000436 | 0.000311 | 0.000358 | 0.002702 | 0        | 0.005023 | 0        |
| 0.00095  | 0.000326 | 0.000868 | 0.000113 | 0.000909 | 0.00033  | 6.15E-05 | 0.000118 | 0.00057  | 0.000393 | 0.000181 | 0.00213  | 0        | 0.002531 | 0.000289 |
| 0.005375 | 0.004417 | 0.014223 | 0        | 0.001758 | 0.007062 | 0.00132  | 0        | 0.001531 | 0.00288  | 0        | 0.009987 | 0        | 0.006145 | 0        |
| 0.208348 | 0.103352 | 0.079742 | 0.0599   | 0.088998 | 0.03129  | 0.162537 | 0.018139 | 0.069735 | 0.110069 | 0.002007 | 0.337337 | 0.002482 | 0.531803 | 0.019029 |
| 0.024402 | 0.014524 | 0.009479 | 0.00584  | 0.011922 | 0.00258  | 0.006929 | 0.002123 | 0.008363 | 0.007768 | 0.000129 | 0.020949 | 0.000117 | 0.028681 | 0.001911 |
| 0.000826 | 0.000694 | 0        | 0.002358 | 0.002208 | 0.000857 | 0.002561 | 0.000132 | 0.001511 | 0.000271 | 0.002276 | 0.001592 | 0.000127 | 0.0002   | 0.00124  |
| 0.109391 | 0.118034 | 0.008765 | 0.35174  | 0.397947 | 0.136814 | 0.49396  | 0.03398  | 0.118593 | 0.058152 | 0.236037 | 0.227886 | 0.005903 | 0.095932 | 0.075302 |
| 0.001636 | 0.000427 | 0        | 0.009608 | 0.005557 | 0.000189 | 0.024777 | 0.002829 | 0.005488 | 0.000683 | 0.001568 | 0.000656 | 0.000513 | 0.001518 | 0.002761 |
| 0.000408 | 0.000272 | 0        | 0.000242 | 0.001688 | 0.000243 | 0.000826 | 0.00112  | 0.000964 | 0.000309 | 0.000688 | 0.000144 | 0        | 0.000944 | 0.000807 |
| 0.025132 | 0.016734 | 0.009807 | 0.082965 | 0.056243 | 0.01327  | 0.009434 | 0.013892 | 0.018254 | 0.023717 | 0.018773 | 0.053067 | 0.006269 | 0.017026 | 0.010925 |
| 0.000293 | 0.000104 | 0        | 0.006988 | 0.000115 | 0        | 0.001562 | 0.000254 | 0.002697 | 0.000143 | 0.000298 | 0        | 0.000142 | 0.000339 | 0.000552 |
| 0.002621 | 0.001164 | 0.000298 | 0.005558 | 0.000734 | 0.000643 | 0.00523  | 0.000386 | 0.002589 | 0.000232 | 0.003929 | 0.007288 | 0.000137 | 0.005902 | 0.001189 |
| 0.050025 | 0.000275 | 0.000118 | 0.001963 | 0.005138 | 0.000256 | 0.029607 | 0.001191 | 0.00314  | 0.005744 | 0.001359 | 0.013106 | 0        | 0.000824 | 0        |
| 0.107893 | 0.55745  | 0.028859 | 0.002757 | 0.097949 | 0.009554 | 0.004042 | 0.024268 | 0.034177 | 0.381713 | 0.007625 | 0.003389 | 0.00066  | 0.022803 | 0.056833 |
| 0.000309 | 0.001474 | 0.000882 | 0        | 0.000755 | 0        | 0        | 8.47E-05 | 0        | 0.002602 | 0        | 0        | 0        | 0.000107 | 0.001538 |
| 0.005943 | 0.005329 | 0.00169  | 0        | 0.004153 | 0.00091  | 0.005286 | 0.001313 | 0.000332 | 0.003505 | 0.002385 | 0.006263 | 0        | 0.000644 | 0.002803 |
| 0.006615 | 0.031944 | 0.011803 | 0        | 0.006225 | 0.005392 | 0.000464 | 0.000956 | 0.000547 | 0.01744  | 0.001017 | 0.001537 | 0        | 0.001193 | 0.00203  |
| 0.010377 | 0.016872 | 0.004307 | 0        | 0.001805 | 0.009434 | 0.00233  | 0.000358 | 0.000918 | 0.010353 | 0.001295 | 0.018598 | 0        | 0.000904 | 0        |
| 0.015466 | 0.01179  | 0.008588 | 0.000169 | 0.002884 | 0.012758 | 0.003698 | 0.000231 | 0.000912 | 0.012241 | 0.002811 | 0.019606 | 0        | 0.000977 | 0.0009   |
| 0.000567 | 0        | 0        | 0        | 0.001322 | 0        | 0        | 0.0021   | 0.000713 | 0.00011  | 0.000579 | 0        | 0        | 0        | 0.000289 |
| 0        | 0        | 0.000517 | 0        | 4.09E-05 | 0.000179 | 0        | 0.000259 | 0.000186 | 0        | 0.000157 | 0.000168 | 0        | 0        | 0        |
| 0.001479 | 0.000897 | 0.001401 | 0.000242 | 0.000522 | 0.000134 | 0        | 0.0004   | 0.001068 | 0.001217 | 0.002723 | 0.001814 | 9.14E-05 | 0.000136 | 0.000722 |
| 0.001078 | 0.000267 | 0.001617 | 0        | 0.000105 | 0.000213 | 0        | 0.000668 | 0.000697 | 0.000585 | 0.001279 | 0.000936 | 0.000102 | 0.000148 | 0.000272 |
| 0.0008   | 0.001311 | 0.008779 | 0        | 0.001406 | 0.003314 | 0.000306 | 0.000777 | 0.001837 | 0.001177 | 0.001436 | 0.001096 | 0        | 0.000649 | 0.001232 |
| 0.029309 | 0.017131 | 0.084366 | 0.010607 | 0.014171 | 0.12788  | 0.010411 | 0.008036 | 0.038919 | 0.024218 | 0.020804 | 0.020317 | 0.001523 | 0.004821 | 0.004876 |
| 0.095931 | 0.047001 | 0.297913 | 0.04276  | 0.052061 | 0.516306 | 0.028886 | 0.04389  | 0.132561 | 0.069363 | 0.07583  | 0.068805 | 0.008381 | 0.021742 | 0.019658 |
| 0.000191 | 0.000365 | 0.00027  | 0        | 0.000456 | 0.000202 | 9.88E-05 | 0        | 0.000186 | 0        | 0.000261 | 0.00028  | 0        | 6.79E-05 | 0        |
| 9.56E-05 | 0        | 0.000244 | 0        | 0.000132 | 0.000759 | 5.22E-05 | 0.000245 | 0.000277 | 0.00018  | 0.000519 | 0.000294 | 0        | 0        | 0        |
| 0.000736 | 0.000287 | 0.002608 | 0        | 0.000387 | 0.002128 | 0        | 0.001045 | 0.000563 | 0.000241 | 0.000253 | 0.000845 | 0        | 0        | 0.000646 |
| 0.000762 | 0.000264 | 0.003237 | 0        | 0.000424 | 0.002444 | 0.000337 | 0.000452 | 0.000254 | 0.000557 | 0.001235 | 0.000421 | 0        | 0.000264 | 0.000306 |
| 0.000115 | 0.00027  | 0        | 0        | 0        | 0        | 9.13E-05 | 0.000235 | 0.000508 | 0.000108 | 0.000716 | 0.000534 | 0.000137 | 0        | 0.000314 |
| 0.000459 | 0.000296 | 0        | 0        | 0.00031  | 0        | 9.51E-05 | 0.000852 | 4.89E-05 | 6.08E-05 | 0.000265 | 0.000153 | 0.000107 | 0        | 0.002761 |
| 0.000169 | 0.000245 | 0        | 0        | 0        | 0        | 5.40E-05 | 0        | 0        | 0        | 0.000157 | 0.000144 | 0        | 6.79E-05 | 0.000773 |
| 0.001043 | 0        | 0.000404 | 0        | 0.000374 | 0        | 0        | 0        | 0        | 0.000466 | 0        | 0        | 0        | 0        | 0.001189 |
| 0.000265 | 0        | 0        | 0        | 0.000107 | 0        | 6.15E-05 | 9.89E-05 | 0        | 0        | 0.000121 | 0.000134 | 0        | 0        | 0.000297 |
| 0        | 0        | 0        | 0        | 0        | 0        | 0        | 0        | 0        | 0        | 0.000177 | 0        | 0.000228 | 0        | 0        |
| 0.001278 | 0.000478 | 0.000536 | 0        | 0.002327 | 0.002108 | 0.002874 | 0.000381 | 0.000756 | 0.000295 | 0.003837 | 0.001474 | 0        | 0.001414 | 0.002668 |
| 0.000194 | 0.000509 | 0        | 0.000206 | 0.0019   | 0.000725 | 0.000354 | 0.000508 | 0.001016 | 0.000187 | 0.003318 | 0.001099 | 0.000147 | 0.000597 | 0.002302 |
| 0.000596 | 0        | 0        | 0.000153 | 0.001028 | 0        | 0.022531 | 0.000141 | 0        | 0        | 0.000346 | 0.000141 | 0.000492 | 0.000252 | 0.000229 |
| 9.25E-05 | 0        | 0        | 0        | 4.87E-05 | 0        | 0        | 0        | 0        | 0        | 0        | 0        | 0.000132 | 0        | 0        |
| 0.000118 | 0        | 0.000129 | 0        | 0.000339 | 3.15E-05 | 0.000149 | 0.002076 | 0        | 0.000204 | 0.000627 | 0.00056  | 0.000254 | 7.10E-05 | 0.002472 |
| 0.00023  | 0        | 0        | 0        | 0.000105 | 0        | 3.54E-05 | 0.003239 | 0        | 0        | 0        | 0        | 0.000162 | 0        | 0.000289 |
| 0.000542 | 0.000338 | 0.00016  | 0.000621 | 0.000321 | 0        | 4.10E-05 | 0.005659 | 6.84E-05 | 6.32E-05 | 0.000386 | 0        | 0.000508 | 6.94E-05 | 0.023124 |
| 0.007138 | 0.000448 | 0.000834 | 0.023456 | 0.001262 | 0.003774 | 0.021385 | 0.000377 | 0.003358 | 0.000122 | 0.008679 | 0.005545 | 0.001249 | 0.00208  | 0.000867 |
| 0        | 0        | 0        | 0        | 7.40E-05 | 0        | 0.000736 | 0        | 0.000254 | 0        | 0        | 0        | 0        | 0        | 0.000348 |
| 0.001132 | 0.003456 | 0.000413 | 0.002938 | 0.011346 | 9.33E-05 | 0.036019 | 0.004228 | 0.001234 | 0.00255  | 0.005119 | 0.000852 | 0.001132 | 0.001285 | 0.008351 |
| 0.000379 | 0.000523 | 0        | 0.000121 | 0.000903 | 0.000106 | 0.00602  | 0.00072  | 0.000287 | 0.000316 | 0.002027 | 0.000132 | 0.000294 | 0.000185 | 0.003483 |
| 0        | 0        | 0        | 0        | 0        | 0        | 0        | 0        | 0        | 0        | 0        | 0        | 0        | 0        | 0.000612 |
| 0        | 0        | 0        | 0        | 0        | 0        | 0        | 0        | 0        | 0        | 0        | 0        | 0        | 0        | 0        |
| 0.003475 | 0        | 0.004647 | 0.001455 | 0.001637 | 0        | 6.15E-05 | 0.001605 | 0.002026 | 0.001862 | 0.001025 | 0        | 0.025233 | 0        | 0.016804 |
| 0.001824 | 0.000545 | 0.005261 | 0.000234 | 0.004611 | 0.000394 | 0.000117 | 0.005282 | 0.003061 | 0.001832 | 0.00516  | 0        | 0.004802 | 0.00087  | 0.016455 |
| 0.000437 | 0.000472 | 0.005955 | 0.000153 | 0.003065 | 0.000915 | 0.000171 | 0.01497  | 0.007279 | 0.001308 | 0.006447 | 0.000689 | 0.011964 | 0.002291 | 0.020125 |
| 0.000915 | 0.000118 | 0.001704 | 0.000733 | 0.002607 | 0.000263 | 5.03E-05 | 0.022842 | 0.002456 | 0.000978 | 0.001146 | 0.000285 | 0.005305 | 0.000338 | 0.019802 |

|          |          |          |          |          |          |          |          |          |          |          |          |          |          |          |
|----------|----------|----------|----------|----------|----------|----------|----------|----------|----------|----------|----------|----------|----------|----------|
| 0.004868 | 0.000784 | 0.005264 | 0.008129 | 0.004706 | 0.001936 | 0.0014   | 0.039234 | 0.026471 | 0.002445 | 0.026719 | 0.005103 | 0.037289 | 0.005498 | 0.062219 |
| 0.001157 | 0.00039  | 0.001814 | 0.004066 | 0.002856 | 0.001881 | 0.000654 | 0.025181 | 0.013809 | 0.002585 | 0.010014 | 0.002027 | 0.020132 | 0.00416  | 0.018579 |
| 0.003555 | 0.000183 | 0.002959 | 0.00031  | 0.004977 | 0.001542 | 5.78E-05 | 0.018327 | 0.015851 | 0.000767 | 0.053201 | 0.004696 | 0.043614 | 0.002555 | 0.021416 |
| 0.001973 | 0.000182 | 0.001477 | 0.002245 | 0.002118 | 0.000393 | 0.000317 | 0.006125 | 0.005862 | 0.000496 | 0.056366 | 0.001199 | 0.019325 | 0.000488 | 0.018579 |
| 0        | 0        | 0        | 0.000701 | 0        | 0        | 0.003303 | 0.027968 | 0.049526 | 0.009401 | 0.024857 | 0        | 0        | 0        | 0        |
| 0.000386 | 0.000537 | 0        | 0.000713 | 0.000471 | 0.000297 | 0.001347 | 0.000668 | 0.000173 | 0.000414 | 0.000479 | 0.00016  | 0.000426 | 0.000434 | 0.000238 |
| 0.002123 | 0.000362 | 0.001233 | 0.005207 | 0.004856 | 0.000633 | 0.000265 | 0.004039 | 0.001215 | 0.000571 | 0.005003 | 0.000682 | 0.00136  | 0.000524 | 0.002684 |
| 0.007588 | 0.002831 | 0.01709  | 0.059884 | 0.025228 | 0.008677 | 0.00914  | 0.025266 | 0.020909 | 0.00471  | 0.041474 | 0.0042   | 0.004345 | 0.016895 | 0.00977  |
| 0.001591 | 0        | 0        | 0.00237  | 0.001229 | 0.000294 | 0.000352 | 0.004228 | 0.000886 | 0.001549 | 0.000479 | 0.000993 | 0.000299 | 0.001195 | 0.002345 |
| 0.023576 | 0.001749 | 0.001749 | 0.026458 | 0.010113 | 0.002795 | 0.003394 | 0.067819 | 0.03702  | 0.011265 | 0.007701 | 0.008068 | 0.002208 | 0.011177 | 0.025817 |
| 0.031563 | 0.002139 | 0        | 0.016379 | 0.008137 | 0.000924 | 0.001605 | 0.091052 | 0.010002 | 0.00431  | 0.007472 | 0.009487 | 0.077202 | 0.007693 | 0.166846 |
| 0.0044   | 0.001209 | 0.025434 | 0.019808 | 0.010035 | 0.01145  | 0.00307  | 0.00273  | 0.00282  | 0.004235 | 0.003881 | 0.012785 | 0.007264 | 0.039485 | 0.003593 |
| 0.001377 | 0        | 0.000163 | 0.000161 | 0.000238 | 8.44E-05 | 6.34E-05 | 0.002839 | 0.001091 | 0.000604 | 0.000672 | 0.001862 | 0.000234 | 0.000903 | 0.001266 |
| 0.001709 | 0.000203 | 0.000708 | 0        | 0.000604 | 0.000103 | 6.52E-05 | 0.002448 | 0.000837 | 0.000894 | 0.000177 | 0.001357 | 0.000122 | 0.000503 | 0.00576  |
| 9.25E-05 | 0.000196 | 0.007199 | 0        | 0.000421 | 0.000124 | 0        | 0.0021   | 0.000619 | 0.001039 | 0.000302 | 0.000285 | 0.00365  | 6.63E-05 | 0.001402 |
| 0.01047  | 0.000863 | 0.203423 | 0.001141 | 0.041862 | 0.002893 | 3.91E-05 | 0.155053 | 0.018788 | 0.022858 | 0.012483 | 0.003032 | 0.621527 | 0.000346 | 0.060758 |
| 0.006472 | 0.000388 | 0.008923 | 0.022428 | 0.016517 | 0.011047 | 0.001418 | 0.060494 | 0.1776   | 0.010844 | 0.026888 | 0.005521 | 0.051517 | 0.017488 | 0.086006 |
| 0.000214 | 7.45E-05 | 0.0003   | 7.66E-05 | 0.000391 | 0.000664 | 5.78E-05 | 0.003272 | 0.001573 | 0.00014  | 0.00115  | 0.000584 | 0.001548 | 0.001143 | 0.002396 |
| 0.012695 | 0.000157 | 0.017927 | 0.001741 | 0.011869 | 0.003428 | 0.000926 | 0.027625 | 0.008468 | 0.008991 | 0.019243 | 0.006539 | 0.001985 | 0.001225 | 0.013456 |
| 0.065201 | 0.005646 | 0.051298 | 0.023443 | 0.013497 | 0.032027 | 0.030105 | 0.080149 | 0.0336   | 0.009272 | 0.163802 | 0.013522 | 0.010381 | 0.073918 | 0.058507 |
| 0.022441 | 0.00737  | 0.013881 | 0.032261 | 0.00631  | 0.010297 | 0.006709 | 0.027535 | 0.051998 | 0.025596 | 0.01149  | 0.051272 | 0.01068  | 0.031111 | 0.012463 |
| 0.000325 | 7.29E-05 | 0.00064  | 0        | 2.34E-05 | 0.000242 | 0        | 0.000231 | 0.000365 | 0        | 0.000527 | 0.000988 | 0        | 0.000333 | 0.000204 |

| HC044    | HC043    | HC150    | HC041    | HC030    | HC042    | HC031    | HC033    | HC034    | HC032    | HC036    | HC037    | HC038    | HC039    | HC040    |
|----------|----------|----------|----------|----------|----------|----------|----------|----------|----------|----------|----------|----------|----------|----------|
| 0.015786 | 0.023059 | 0.034928 | 0.006536 | 0.036085 | 0.110802 | 0.06919  | 0.054212 | 0.024446 | 0.012395 | 0.016886 | 0.000538 | 0.027937 | 0.018309 | 0.00777  |
| 4.97E-05 | 0.002725 | 0.003237 | 0        | 0        | 0        | 0        | 0.000171 | 4.10E-05 | 0        | 0        | 0.004009 | 0        | 0        | 0.002101 |
| 0.000908 | 0.015167 | 0.002563 | 6.53E-05 | 5.55E-05 | 0.000506 | 0        | 0.000331 | 0.000101 | 0.000221 | 0.001916 | 0.060256 | 0        | 0        | 0.02345  |
| 7.02E-05 | 0.000285 | 0.000896 | 0        | 0.000558 | 0.00565  | 0.001476 | 0.002459 | 0.001138 | 0.000243 | 0.000104 | 0        | 0.000408 | 0.001295 | 0.00076  |
| 5.65E-05 | 0.000524 | 0.003687 | 0.000338 | 0.004327 | 0.010913 | 0.003281 | 0.006909 | 0.003101 | 0.00046  | 0.000868 | 0.000464 | 0.00045  | 0.003254 | 0        |
| 3.60E-05 | 0.000176 | 0        | 0.00022  | 0.001292 | 0.000867 | 0        | 0.001816 | 0.001424 | 0        | 0.0001   | 0        | 0        | 0.00053  | 0.000209 |
| 0.001283 | 0.000107 | 0        | 0.00077  | 0.006197 | 0.004484 | 7.92E-05 | 0.003952 | 0.007674 | 5.96E-05 | 0.000359 | 0        | 0        | 0.001991 | 0.000477 |
| 0.042854 | 0.036568 | 0.030613 | 0.010913 | 0.0029   | 0.046146 | 0.000339 | 0.059051 | 0.03137  | 0.01288  | 0.030432 | 0.03778  | 0.004874 | 0.037933 | 0.05727  |
| 0.000524 | 0.000486 | 0.001775 | 0.000381 | 5.38E-05 | 0.000428 | 0        | 0.000349 | 0.000104 | 5.54E-05 | 0.000166 | 0        | 0.000103 | 0.000509 | 0        |
| 0.002208 | 0.000361 | 0        | 0.003277 | 0.004598 | 0.000346 | 0.000107 | 0.000265 | 0.000845 | 7.45E-05 | 6.56E-05 | 0        | 0.000504 | 4.87E-05 | 0        |
| 0.001353 | 0        | 0        | 0.0011   | 0.002388 | 0.000294 | 0        | 0.000567 | 0.001907 | 0.000124 | 4.24E-05 | 0        | 0.000302 | 0.000562 | 0        |
| 0.005707 | 0        | 0        | 0.009104 | 0.008053 | 0.000908 | 0        | 0.002463 | 0.000728 | 0        | 0.000189 | 0        | 0        | 0.004315 | 0        |
| 0.489623 | 0.021855 | 0.00246  | 0.435667 | 0.590051 | 0.119888 | 0.003269 | 0.122148 | 0.460412 | 0.006276 | 0.020534 | 0        | 0.017416 | 0.025763 | 0.013051 |
| 0.031566 | 0.000295 | 0        | 0.033852 | 0.043116 | 0.012162 | 0.000747 | 0.004054 | 0.013044 | 0.000603 | 0.002283 | 0.000258 | 0.00196  | 0.002266 | 0.001862 |
| 0.001095 | 0.003198 | 0.000451 | 0.000968 | 0.000172 | 0.000402 | 0        | 0.001235 | 0.000558 | 0.000124 | 0.002584 | 0        | 0.000426 | 0.003122 | 0.000715 |
| 0.106201 | 0.327925 | 0.048993 | 0.233893 | 0.036585 | 0.173212 | 0.019447 | 0.250961 | 0.058243 | 0.056694 | 0.276776 | 0.000317 | 0.086188 | 0.298707 | 0.215462 |
| 0.00195  | 0.008965 | 0.001438 | 0.001242 | 0.000277 | 0.001166 | 0.004033 | 0.003629 | 0.001982 | 0.001054 | 0.004265 | 0        | 0.001036 | 0.004383 | 0.003941 |
| 0.000368 | 0.000342 | 0.000417 | 0.000699 | 0.000269 | 0.000397 | 0.000826 | 0.000708 | 0.00052  | 7.45E-05 | 0.00106  | 0.000825 | 0.000251 | 0.00146  | 0.001028 |
| 0.025538 | 0.019525 | 0.00693  | 0.010578 | 0.025336 | 0.069274 | 0.002353 | 0.051376 | 0.005298 | 0.020449 | 0.036721 | 0.000442 | 0.002709 | 0.031978 | 0.067177 |
| 0.0013   | 0.001765 | 0        | 0.000888 | 0        | 0.000253 | 0        | 0.000745 | 0.000202 | 0.000136 | 0        | 0        | 0.000426 | 0        | 0.00041  |
| 0.000745 | 0.000906 | 0        | 0.022683 | 0        | 0.000506 | 0        | 0.025027 | 8.51E-05 | 0.002023 | 8.87E-05 | 0        | 0.001872 | 3.16E-05 | 0.001102 |
| 0.001175 | 0.000229 | 0        | 0.008421 | 0        | 0.001388 | 0.000198 | 0.007693 | 0.182069 | 0.000737 | 0.002576 | 0        | 0.000226 | 0        | 0.003643 |
| 0.010233 | 0.004465 | 0.017113 | 0.021812 | 0.06939  | 0.047674 | 0.001935 | 0.101302 | 0.000287 | 0.001791 | 0.004847 | 0.000295 | 0.054515 | 0.000153 | 0.012939 |
| 7.20E-05 | 0        | 0.000388 | 5.78E-05 | 0.00125  | 0.000227 | 0        | 0        | 0        | 0        | 0        | 0        | 0.000124 | 0        | 0        |
| 0.001518 | 0        | 0.000839 | 0.006815 | 0.002315 | 0.003426 | 0        | 0.006393 | 0.001491 | 5.75E-05 | 0.00295  | 0        | 0.002023 | 0.006984 | 0.002764 |
| 0.001353 | 9.41E-05 | 0.001815 | 0.00222  | 0.00394  | 0.001326 | 0        | 0.0047   | 0        | 0        | 0.002186 | 0        | 0.000489 | 0.002813 | 0        |
| 0.001405 | 0        | 0.001273 | 0.00786  | 0.001228 | 0.006011 | 0        | 0.007897 | 0.000107 | 0.000268 | 0.003602 | 0        | 0.001057 | 0.017796 | 0        |
| 0.005124 | 0        | 0.001404 | 0.009628 | 0.004143 | 0.005944 | 8.48E-05 | 0.008409 | 0.00023  | 0.000498 | 0.005202 | 0        | 0.004083 | 0.025549 | 0        |
| 0.000211 | 0        | 0        | 0.000931 | 0        | 8.77E-05 | 9.62E-05 | 0.000803 | 0        | 0.000524 | 0.000174 | 0        | 0        | 5.11E-05 | 0        |
| 9.94E-05 | 0        | 0.000325 | 8.58E-05 | 4.86E-05 | 0.000206 | 0        | 0.000182 | 0        | 0        | 8.10E-05 | 0        | 0        | 0.001163 | 0        |
| 0.000117 | 0        | 0.0023   | 0.000261 | 0.000538 | 8.77E-05 | 9.05E-05 | 0.000846 | 0        | 0.000121 | 0.000409 | 0.000243 | 0        | 0.003441 | 0        |
| 0        | 5.64E-05 | 0.000188 | 0.000125 | 0.000135 | 0.00066  | 0        | 0.000766 | 0        | 0.000177 | 0.000262 | 0.000221 | 0        | 0.001866 | 0        |
| 0.000199 | 0        | 0.001359 | 0.000699 | 0.001131 | 0.00064  | 0        | 0.000952 | 0.000328 | 0.000454 | 0.000513 | 0        | 0        | 0.002594 | 0.000283 |
| 0.016912 | 0.004443 | 0.013391 | 0.015903 | 0.007867 | 0.015429 | 0.00116  | 0.019157 | 0.00191  | 0.054045 | 0.02589  | 0.001201 | 0.012321 | 0.070456 | 0.000462 |
| 0.094018 | 0.025094 | 0.070262 | 0.056419 | 0.039006 | 0.046229 | 0.005656 | 0.057351 | 0.006454 | 0.179435 | 0.136505 | 0.005556 | 0.043954 | 0.276927 | 0.004008 |
| 5.83E-05 | 0        | 0.000371 | 8.77E-05 | 0.000114 | 0        | 0        | 0.000291 | 0        | 0        | 0.000247 | 0        | 0        | 0.000139 | 0.000238 |
| 3.43E-05 | 0        | 0.000371 | 0        | 4.51E-05 | 0        | 0        | 0        | 0        | 0.000117 | 6.94E-05 | 0        | 0        | 0.00084  | 0        |
| 0.000233 | 0.000176 | 0.00246  | 0.00063  | 0.000413 | 0.000108 | 0.000192 | 0        | 0        | 0.000253 | 0.000228 | 0        | 0.000616 | 0.000506 | 0        |
| 0.000684 | 8.15E-05 | 0.00177  | 0.000699 | 0.000468 | 0.000227 | 0.000113 | 0        | 0        | 0.000867 | 0.000501 | 0        | 0.000199 | 0.000784 | 0        |
| 0        | 0        | 0.001307 | 0        | 0.000326 | 0.0016   | 0        | 0.000864 | 0.003259 | 0.000396 | 0.000162 | 0        | 0        | 0.000406 | 0.001736 |
| 0        | 0        | 0.000382 | 0.000132 | 0        | 0.001507 | 0        | 0.000981 | 0.000391 | 0        | 0.000301 | 0.001415 | 0        | 0        | 0.007814 |
| 0        | 0        | 0        | 0.000103 | 0        | 0.000552 | 0        | 0.00093  | 0.000227 | 0        | 0.0001   | 0        | 0.000118 | 0        | 0.001028 |
| 0        | 0        | 0.00141  | 0        | 0.000352 | 0.000495 | 0        | 0.000454 | 0        | 0.000211 | 0.000204 | 0.000258 | 0        | 0.000922 | 0.000358 |
| 0        | 0        | 0        | 0        | 0.000113 | 0.000237 | 0        | 0.000203 | 0        | 0        | 7.71E-05 | 0.000221 | 0        | 0.000226 | 0.000812 |
| 0        | 0        | 0        | 0        | 0        | 0        | 0        | 0.000136 | 0        | 0        | 0.000251 | 0        | 0        | 9.98E-05 | 0.000201 |
| 0.00036  | 0.001831 | 0.000782 | 0.002757 | 0.000815 | 0.000521 | 0.000583 | 0.000287 | 0.000129 | 0.00013  | 0.001234 | 0        | 0.000785 | 0.001348 | 0        |
| 6.00E-05 | 0.000944 | 0.000177 | 0.000384 | 0.000142 | 0.00064  | 0.000928 | 0.000716 | 0.000154 | 0.000158 | 0.000679 | 0        | 0.000136 | 0.00475  | 0.001855 |
| 0.00025  | 0        | 0.000719 | 0.002192 | 0.000317 | 0.000253 | 0.000566 | 0.000756 | 0.003479 | 0.000155 | 0.001249 | 0        | 0        | 0.000187 | 0.000238 |
| 0        | 0        | 0        | 9.14E-05 | 0        | 0.000108 | 0        | 0.000196 | 4.10E-05 | 0        | 0        | 0        | 0        | 6.08E-05 | 0.000216 |
| 0        | 0.000276 | 0.000382 | 0.000147 | 0        | 0        | 0.000373 | 0.000287 | 0.000321 | 7.24E-05 | 0.000366 | 0        | 0        | 0.000477 | 0.007047 |
| 0        | 0.000219 | 0.000171 | 0        | 0        | 0        | 0.022705 | 0        | 0.001755 | 0        | 0.000208 | 0        | 0        | 0.000105 | 0.000939 |
| 6.34E-05 | 0.00084  | 0.004156 | 0        | 0.000189 | 0.000196 | 0.006901 | 0.000312 | 0.006703 | 0        | 0.003139 | 0        | 0.000121 | 6.33E-05 | 0.010548 |
| 0.003269 | 0.001837 | 0.00036  | 0.004435 | 0.000111 | 0.020207 | 0.000554 | 0.0181   | 0.001031 | 0.000251 | 0.020152 | 0        | 0.000882 | 0.002253 | 0.001132 |
| 5.65E-05 | 0        | 0        | 4.29E-05 | 5.90E-05 | 0        | 0.00013  | 0.000109 | 0.00018  | 8.09E-05 | 0.000162 | 0        | 0        | 0        | 0.000283 |
| 0.002414 | 0.00064  | 0.003134 | 0.007757 | 0.001606 | 0.005986 | 0.003394 | 0.00186  | 0.046343 | 0.000422 | 0.01013  | 0        | 0.003971 | 0.001691 | 0.01431  |
| 0.000264 | 8.47E-05 | 0.000554 | 0.000895 | 0.000224 | 0.002157 | 0.000413 | 0.001544 | 0.005194 | 8.09E-05 | 0.007334 | 0.000317 | 0.000631 | 0.000212 | 0.007323 |
| 0        | 0        | 0.00125  | 0        | 0        | 0        | 0        | 0        | 0        | 0        | 0.000108 | 0        | 6.95E-05 | 0        | 0        |
| 0        | 0        | 0.000166 | 0        | 0        | 0        | 0        | 0        | 0        | 6.81E-05 | 8.10E-05 | 0        | 0        | 0        | 0.000216 |
| 9.77E-05 | 0.00121  | 0.012701 | 0        | 0.000539 | 0.010542 | 0.007942 | 0.000356 | 0.000142 | 0.001957 | 0.006478 | 0.019144 | 0.001045 | 0.000457 | 0.062976 |
| 0.000598 | 0.001022 | 0.008996 | 0.000194 | 0.001575 | 0.002755 | 0.005922 | 0.000723 | 0.003816 | 0.000198 | 0.002129 | 0.013699 | 0.000867 | 0.001577 | 0.00371  |
| 0.000164 | 0.001032 | 0.008945 | 0.000256 | 0.000586 | 0.003901 | 0.005555 | 0.003818 | 0.001828 | 0.001161 | 0.002757 | 0.029373 | 0.000483 | 0.0044   | 0.007762 |
| 0.000889 | 0.007507 | 0.005417 | 0.000112 | 0.000352 | 0.00614  | 0.006279 | 0.004395 | 0.005231 | 0.000464 | 0.002121 | 0.011098 | 0.000311 | 0.000796 | 0.000447 |

|          |          |          |          |          |          |          |          |          |          |          |          |          |          |          |
|----------|----------|----------|----------|----------|----------|----------|----------|----------|----------|----------|----------|----------|----------|----------|
| 0.004509 | 0.017098 | 0.02757  | 0.002313 | 0.001495 | 0.006409 | 0.11279  | 0.003458 | 0.00121  | 0.008167 | 0.017237 | 0.026624 | 0.013393 | 0.008802 | 0.008261 |
| 0.001335 | 0.014762 | 0.009424 | 0.000735 | 0.001013 | 0.006244 | 0.03912  | 0.003963 | 0.000936 | 0.015681 | 0.008657 | 0.020714 | 0.003216 | 0.0244   | 0.008291 |
| 0.0019   | 0.005845 | 0.020789 | 0.000373 | 0.00196  | 0.009355 | 0.151339 | 0.003498 | 0.002461 | 0.033638 | 0.007824 | 0.041693 | 0.010467 | 0.00694  | 0.038229 |
| 0.001258 | 0.007732 | 0.01185  | 0.000256 | 0.000421 | 0.004603 | 0.02766  | 0.002299 | 0.002609 | 0.001947 | 0.004967 | 0.011392 | 0.000568 | 0.002207 | 0.026713 |
| 0        | 0        | 0        | 0        | 0        | 0.0232   | 0        | 0.006367 | 0.035495 | 0.300236 | 0.050568 | 0.01689  | 0.097902 | 0        | 0.000268 |
| 0.000348 | 0.005415 | 0.000365 | 0.000369 | 0        | 0.000789 | 0.001024 | 0.000781 | 0.001406 | 0.000411 | 0.003717 | 0        | 0.000827 | 0.001752 | 0.000417 |
| 0.000706 | 0.008403 | 0.002289 | 4.29E-05 | 0.00047  | 0.002683 | 0.008553 | 0.000716 | 0.000744 | 0.001736 | 0.005144 | 0.007325 | 0.0008   | 0.001725 | 0.010235 |
| 0.009935 | 0.038418 | 0.004235 | 0.003947 | 0.008072 | 0.014484 | 0.014249 | 0.004141 | 0.007378 | 0.019782 | 0.041723 | 0.017825 | 0.016763 | 0.019363 | 0.050975 |
| 0.002841 | 0.013257 | 0.000805 | 0.000371 | 5.38E-05 | 0.00146  | 0.000113 | 0.000516 | 0.001245 | 0.000611 | 0.001392 | 0.01319  | 0.000269 | 0.000294 | 0.02754  |
| 0.009128 | 0.020316 | 0.024916 | 0.003939 | 0.004624 | 0.023519 | 0.002478 | 0.019259 | 0.016    | 0.009424 | 0.035977 | 0.064257 | 0.010017 | 0.004057 | 0.014846 |
| 0.005895 | 0.020617 | 0.146026 | 0.002662 | 0.000801 | 0.025867 | 0.007749 | 0.051506 | 0.00086  | 0.0046   | 0.026857 | 0.072562 | 0.001824 | 0.002913 | 0.137207 |
| 0.004016 | 0.010664 | 0.003197 | 0.00896  | 0.001689 | 0.006512 | 0.001669 | 0.004889 | 0.002638 | 0.004988 | 0.012821 | 0.000781 | 0.012179 | 0.021782 | 0.000767 |
| 0.000242 | 0.000235 | 0.001341 | 0.000214 | 0.000186 | 0.000599 | 0.000124 | 0.00041  | 0.000145 | 0.000192 | 0.000925 | 0.00311  | 0.000112 | 0.000453 | 0.00114  |
| 0.000379 | 0.000436 | 0.002945 | 0.000664 | 0.00073  | 0.000433 | 0.000272 | 0.000283 | 0.000384 | 0.000164 | 0.001704 | 0.001643 | 0.000103 | 0.001    | 0.000492 |
| 6.34E-05 | 0.000314 | 0.000913 | 0        | 0.000926 | 0.001094 | 0.001437 | 0.000298 | 0        | 0        | 0.000243 | 0.000936 | 0.001063 | 0.000292 | 0.000216 |
| 0.001215 | 0.006318 | 0.034888 | 0.000153 | 0.014262 | 0.027544 | 0.021438 | 0.003295 | 0.000511 | 0.011709 | 0.029884 | 0.269039 | 0.027454 | 0.008911 | 0.023443 |
| 0.010206 | 0.076155 | 0.049181 | 0.000888 | 0.005435 | 0.041569 | 0.251804 | 0.006001 | 0.017626 | 0.078536 | 0.032433 | 0.199484 | 0.019844 | 0.008364 | 0.003106 |
| 0.000111 | 0.00074  | 0.001336 | 0.000168 | 0.000225 | 0.000315 | 0.013791 | 0.000105 | 5.04E-05 | 0.000366 | 0.000594 | 0.002358 | 0.000556 | 0.000647 | 0        |
| 0.031819 | 0.055927 | 0.01773  | 0.00913  | 0.025245 | 0.000139 | 0.010193 | 0.002027 | 0.001087 | 0.058809 | 0.022149 | 0.010965 | 0.233292 | 0.003402 | 0        |
| 0.027742 | 0.108429 | 0.276851 | 0.022742 | 0.021376 | 0.02725  | 0.09637  | 0.006353 | 0.007497 | 0.048209 | 0.023792 | 0.015563 | 0.19041  | 0.005023 | 0.002361 |
| 0.015082 | 0.072505 | 0.057761 | 0.016516 | 0.008991 | 0.029856 | 0.057425 | 0.033719 | 0.013394 | 0.041646 | 0.030185 | 0.015718 | 0.082241 | 0.009062 | 0.002421 |
| 0.000115 | 9.72E-05 | 0.000559 | 0.000228 | 0.000371 | 0        | 0.003349 | 6.17E-05 | 0        | 5.32E-05 | 0.000104 | 0        | 0.000812 | 5.84E-05 | 0        |

| HC035    | SP10     | SP15     | SP14     | SP13     | SP12     | SP11     | SP09     | SP04     | SP07     | SP06     | SP05     | SP16     | SP03     | SP02     |
|----------|----------|----------|----------|----------|----------|----------|----------|----------|----------|----------|----------|----------|----------|----------|
| 0.089715 | 0.005323 | 0.001119 | 0.039838 | 0.001897 | 0.001715 | 0.000272 | 0.037967 | 0.000372 | 0.009622 | 0        | 0.001029 | 0        | 0.00049  | 0.022192 |
| 0.000147 | 0        | 0        | 0.000365 | 0        | 0        | 0        | 0        | 0        | 0        | 0        | 0        | 0        | 0        | 0        |
| 0.004219 | 0        | 0        | 0.004387 | 0        | 0        | 0        | 0        | 0        | 0        | 0        | 0        | 0        | 0        | 0        |
| 0.000745 | 0.000759 | 0.002105 | 0.006818 | 0.000353 | 0.000175 | 0        | 0.00596  | 0.000101 | 0.011703 | 0        | 0        | 0.000264 | 0        | 0.005656 |
| 0.002211 | 0.000874 | 0.002774 | 0.001398 | 0.001401 | 0.00035  | 0.000143 | 0.010488 | 0.000181 | 0.042726 | 0        | 0.000169 | 0.000362 | 0        | 0.013642 |
| 0.000255 | 0.000346 | 0.001647 | 0        | 0.000955 | 0        | 0        | 0.00015  | 8.47E-05 | 0        | 0.000683 | 0.000199 | 0        | 0        | 0.002242 |
| 0.002258 | 0.001697 | 0.000556 | 0        | 0.001668 | 0.000486 | 0        | 0.001195 | 0.000166 | 0.005236 | 0.001132 | 0.000186 | 0.000337 | 0        | 0.002264 |
| 0.021561 | 0.030438 | 0.033869 | 0.05945  | 0        | 0.001532 | 0.000569 | 0.007102 | 0.008075 | 0.047485 | 0.002844 | 0.001545 | 0.01287  | 0.000588 | 0.012222 |
| 0.000299 | 0.001755 | 0        | 0.00042  | 0        | 0        | 0        | 0.000965 | 9.63E-05 | 0.007556 | 0.000331 | 0        | 0        | 0        | 0.001801 |
| 0.000949 | 0.001415 | 0        | 0.000303 | 0.000254 | 0.000147 | 0        | 0        | 0        | 0.001082 | 0        | 0.000848 | 0        | 0        | 0.001084 |
| 0.000194 | 0.001089 | 0.001098 | 0        | 0.000242 | 0.000166 | 0        | 0        | 0.000183 | 0        | 0        | 0.000194 | 0        | 0        | 0.000594 |
| 0.000719 | 0.001337 | 0        | 0.000351 | 0.001401 | 0.015858 | 0        | 0        | 0        | 0        | 0        | 0.012448 | 0        | 0        | 0.001119 |
| 0.388143 | 0.06225  | 0.015924 | 0.013181 | 0.010489 | 0.410967 | 0.000129 | 0.002178 | 0.005363 | 0.006631 | 0.002705 | 0.550759 | 0.000344 | 0.00149  | 0.042509 |
| 0.02037  | 0.004624 | 0.003724 | 0.001487 | 0        | 0.012822 | 0        | 0        | 0.000654 | 0.002148 | 0.001011 | 0.016804 | 0.000283 | 0        | 0.003991 |
| 0.002436 | 0.000959 | 0        | 0        | 0.001723 | 0        | 0        | 0.000212 | 0        | 0        | 0        | 0        | 0        | 0        | 0        |
| 0.284918 | 0.173308 | 0.085632 | 0.070028 | 0.140742 | 0.004079 | 0.000132 | 0.009011 | 0.000271 | 0.021273 | 0.064032 | 0.001185 | 0.038149 | 0.001921 | 0.084222 |
| 0.000913 | 0.001404 | 0        | 0.000737 | 0        | 0.000194 | 0        | 0.000384 | 7.14E-05 | 0.001089 | 0        | 0        | 0.00104  | 0        | 0.002798 |
| 0.000171 | 0.0013   | 0.000577 | 0        | 0.001004 | 0        | 0        | 0.000794 | 0        | 0.001067 | 0        | 0        | 0.000312 | 0        | 0.001106 |
| 0.01692  | 0.02394  | 0.015804 | 0.012368 | 0.010489 | 0.001953 | 0.000144 | 0.028021 | 0.001735 | 0.010801 | 0.021904 | 0.002489 | 0.003457 | 0        | 0.036652 |
| 1.81E-05 | 0.000778 | 0        | 0        | 0        | 0        | 0        | 0.000203 | 9.30E-05 | 0        | 0        | 0        | 0.000395 | 0        | 0        |
| 0.001805 | 0        | 0        | 0        | 0.000347 | 0.000333 | 0        | 0.000203 | 0        | 0.001141 | 0        | 0        | 0.000656 | 0        | 0        |
| 0.026013 | 0.007828 | 0        | 0.001157 | 0        | 0        | 0        | 0        | 0        | 0        | 0        | 0        | 0        | 0        | 0        |
| 0.085503 | 0.046273 | 0.001697 | 0.390376 | 0.006032 | 0.230321 | 0.905747 | 0.016828 | 0.921265 | 0.183726 | 0.549335 | 0.19425  | 0.706818 | 0.008391 | 0.005647 |
| 0.000953 | 0.000353 | 0        | 0.011907 | 0        | 0.002137 | 0.001245 | 0.00037  | 0.002604 | 0.002297 | 0        | 0.000851 | 0.001924 | 0.000569 | 0        |
| 0.000791 | 0.001518 | 0        | 0.029439 | 0.068229 | 0.015606 | 0.021146 | 0.005529 | 0.014097 | 0.034446 | 0.028214 | 0.011067 | 0.038471 | 0        | 0.001158 |
| 0.000936 | 0.002278 | 0        | 0.011528 | 0.003366 | 0.015439 | 0.009027 | 0        | 0.004425 | 0.001074 | 0.006399 | 0.01072  | 0.007105 | 0        | 0        |
| 0.000419 | 0.001009 | 0        | 0.00699  | 0.078533 | 0.031158 | 0.011976 | 0.00313  | 0.004236 | 0.006601 | 0.017144 | 0.024373 | 0.008366 | 0.000627 | 0.001106 |
| 0.000426 | 0.002117 | 0        | 0.005516 | 0.015845 | 0.014571 | 0.001376 | 0.001755 | 0.001289 | 0.003297 | 0.001873 | 0.013857 | 0.001326 | 0        | 0.000612 |
| 0        | 7.34E-05 | 0        | 0.000399 | 0        | 0        | 0        | 0.00022  | 0        | 0.001052 | 0        | 0        | 0        | 0        | 0.006906 |
| 2.41E-05 | 6.65E-05 | 0        | 0.000358 | 0        | 0.000144 | 0        | 0.000225 | 0.000103 | 0.002118 | 0        | 0        | 0        | 0        | 0        |
| 4.10E-05 | 0.000427 | 0        | 0        | 0.000992 | 0        | 0.000143 | 0.000379 | 0        | 0.005482 | 0.001369 | 0.000342 | 0.001033 | 0        | 0.001718 |
| 0        | 0.000704 | 0.000507 | 0        | 0.000316 | 0.000291 | 0        | 0.000414 | 0.000186 | 0.002171 | 0.006265 | 0.000171 | 0.002355 | 0        | 0        |
| 0        | 0.000736 | 0.001091 | 0.002899 | 0.002901 | 0.003371 | 0.000274 | 0.001001 | 0.00042  | 0.001104 | 0        | 0.001293 | 0        | 0        | 0.001097 |
| 0.000988 | 0.021511 | 0        | 0.00564  | 0.022169 | 0.030626 | 0.000943 | 0.003858 | 0.000787 | 0.002223 | 0.00248  | 0.022302 | 0.00067  | 0        | 0.005879 |
| 0.004023 | 0.062293 | 0.000542 | 0.024536 | 0.084614 | 0.108237 | 0.005393 | 0.011251 | 0.002426 | 0.019028 | 0.004647 | 0.08949  | 0.006775 | 0.003058 | 0.016243 |
| 0        | 3.90E-05 | 0        | 0.00042  | 0.001575 | 0.00068  | 0        | 0.00041  | 0        | 0        | 0.001059 | 0        | 0        | 0        | 0        |
| 0        | 0.000117 | 0        | 0        | 0        | 0        | 0        | 0        | 0        | 0        | 0        | 0        | 0        | 0        | 0.000608 |
| 0        | 0.000938 | 0        | 0.000358 | 0.001271 | 0.000208 | 0        | 0        | 0        | 0.002126 | 0.000331 | 0        | 0        | 0        | 0        |
| 2.41E-05 | 0.000966 | 0        | 0        | 0.000967 | 0.000175 | 0        | 0.000212 | 0        | 0.00326  | 0        | 0        | 0        | 0        | 0.002212 |
| 3.37E-05 | 0.000663 | 0.005583 | 0        | 0.001221 | 0        | 0        | 0.005506 | 0        | 0.011577 | 0.004611 | 0        | 0.003757 | 0        | 0.001692 |
| 2.05E-05 | 0.001115 | 0.059789 | 0.001315 | 0.016682 | 0.00015  | 0        | 0.007111 | 0        | 0.008608 | 0.003388 | 0        | 0.009841 | 0        | 0.001753 |
| 0        | 0.000138 | 0.062288 | 0.000324 | 0.013731 | 0.000297 | 0.000144 | 0.001843 | 0        | 0.007332 | 0.004541 | 0        | 0.004674 | 0        | 0        |
| 0        | 0        | 0        | 0.002128 | 0.000298 | 0        | 0        | 0.000225 | 7.64E-05 | 0        | 0        | 0        | 0.000322 | 0        | 0.000603 |
| 0        | 0        | 0.001021 | 0.001226 | 0        | 0        | 0        | 0.000877 | 0.000211 | 0.001029 | 0        | 0        | 0.001018 | 0        | 0.001136 |
| 0        | 5.96E-05 | 0.005561 | 0        | 0.000248 | 0.000322 | 0        | 0.001728 | 0        | 0        | 0.000343 | 0        | 0        | 0        | 0        |
| 0.000932 | 0.003094 | 0.002922 | 0.001391 | 0.004959 | 0        | 0        | 0.000965 | 0        | 0.0096   | 0.004283 | 0        | 0.000638 | 0        | 0.007545 |
| 5.78E-05 | 0.001312 | 0.004189 | 0.000337 | 0.000608 | 0        | 0        | 0.000168 | 0        | 0.001014 | 0        | 0.000128 | 0.000301 | 0        | 0.004533 |
| 0.000129 | 0.000826 | 0        | 0.000723 | 0.000322 | 0.025312 | 0.030884 | 0.000838 | 0        | 0.001096 | 0        | 0.009298 | 0.000359 | 0        | 0.001106 |
| 0        | 0.000213 | 0        | 0        | 0        | 0.000807 | 0.001643 | 0        | 0        | 0        | 0.004775 | 0.000322 | 0        | 0        | 0.00118  |
| 0        | 0.000665 | 0.028202 | 0.004641 | 0.003267 | 0.000719 | 0        | 0.002561 | 0.000649 | 0.00326  | 0.000349 | 0.000649 | 0.004674 | 0        | 0.004026 |
| 2.41E-05 | 0.000394 | 0.004667 | 0.002803 | 0.012963 | 0.00035  | 0.000129 | 0.027025 | 8.97E-05 | 0.001044 | 0.001439 | 0        | 0.004765 | 0        | 0.002295 |
| 0.000114 | 0.001768 | 0.001162 | 0.078167 | 0.068589 | 0.000483 | 0.000119 | 0.129546 | 0.015108 | 0.005378 | 0.011738 | 0.000322 | 0.024319 | 0        | 0.001154 |
| 0.000549 | 0.008931 | 0.1728   | 0.005654 | 0.014556 | 0.027018 | 0.000284 | 0.152546 | 0.000213 | 0        | 0.186599 | 0.00382  | 0.002522 | 0        | 0.00803  |
| 0        | 0        | 0        | 0        | 0.004724 | 0        | 0        | 0.002297 | 0        | 0        | 0.000722 | 0        | 0.00613  | 0        | 0        |
| 0.001088 | 0.016555 | 0.028314 | 0.001191 | 0.208848 | 0.007059 | 0        | 0.088868 | 0.000256 | 0.004222 | 0.030084 | 0.002063 | 0.069964 | 0.002039 | 0        |
| 0.00034  | 0.001502 | 0.006667 | 0.001412 | 0.023254 | 0.000647 | 0        | 0.030221 | 9.96E-05 | 0.001044 | 0.001679 | 0.000156 | 0.009775 | 0        | 0        |
| 0        | 0        | 0        | 0.001474 | 0        | 0        | 0        | 0.001702 | 9.80E-05 | 0.002171 | 0        | 0        | 0.000272 | 0.000961 | 0.003453 |
| 0        | 0        | 0        | 0.00031  | 0        | 0        | 0        | 0.000591 | 0        | 0        | 0        | 0        | 0        | 0        | 0.002317 |
| 7.71E-05 | 0.004782 | 0        | 0.013119 | 0        | 0        | 0        | 0.000339 | 0.000538 | 0        | 0        | 0        | 0        | 0        | 0.000603 |
| 2.77E-05 | 0.001998 | 0.003879 | 0.00303  | 0.000626 | 0.00033  | 0.000255 | 0.004069 | 0.000286 | 0.001096 | 0        | 0        | 0.000634 | 0.001372 | 0.001753 |
| 2.53E-05 | 0.003344 | 0.075756 | 0.006391 | 0.002498 | 0.002869 | 0.000574 | 0.002636 | 0.001343 | 0.016037 | 0        | 0.000491 | 0.002268 | 0.002411 | 0.032316 |
| 1.93E-05 | 0.004161 | 0.005083 | 0.000964 | 0        | 0.000286 | 0        | 0        | 9.30E-05 | 0        | 0        | 0        | 0.000659 | 0.000588 | 0.004612 |

|          |          |          |          |          |          |          |          |          |          |          |          |          |          |          |
|----------|----------|----------|----------|----------|----------|----------|----------|----------|----------|----------|----------|----------|----------|----------|
| 0.00044  | 0.018642 | 0.051053 | 0.003643 | 0.001302 | 0.000355 | 0.002235 | 0.004933 | 0.000865 | 0.017052 | 0        | 0.001777 | 0.000304 | 0.050757 | 0.052536 |
| 0.000211 | 0.006048 | 0.009652 | 0.005165 | 0.000298 | 0.001418 | 0        | 0.000397 | 0.000311 | 0.0118   | 0        | 0.001326 | 0        | 0.03325  | 0.015823 |
| 0.000358 | 0.009679 | 0.005188 | 0.002968 | 0.000961 | 0.000438 | 0.000431 | 0.002663 | 0.001969 | 0.0128   | 0        | 0.000156 | 0.001377 | 0.005705 | 0.067206 |
| 7.83E-05 | 0.001374 | 0.011405 | 0.001357 | 0        | 0.000658 | 0.000141 | 0.000445 | 0.002394 | 0.004334 | 0        | 0        | 0.000884 | 0        | 0.039755 |
| 0        | 0.029575 | 0        | 0        | 0        | 0        | 0        | 0        | 0        | 0        | 0        | 0        | 0        | 0        | 0        |
| 0.000188 | 0.001021 | 0        | 0        | 0        | 0.000347 | 0        | 0        | 0        | 0        | 0        | 0.000196 | 0.000322 | 0        | 0        |
| 0.000146 | 0.000835 | 0        | 0.004022 | 0.000986 | 0.000277 | 0        | 0.000185 | 0.000106 | 0.001096 | 0        | 0        | 0.000942 | 0        | 0        |
| 0.003047 | 0.024644 | 0.002682 | 0.016486 | 0.005449 | 0.005788 | 0.00134  | 0.00287  | 0.000369 | 0.003282 | 0.00034  | 0.003785 | 0.001007 | 0        | 0.00111  |
| 0.002195 | 0.001105 | 0.001021 | 0        | 0        | 0.000302 | 0.000138 | 0        | 0        | 0.003088 | 0        | 0        | 0        | 0        | 0        |
| 0.003891 | 0.018193 | 0.005153 | 0.003781 | 0.010241 | 0.0002   | 0        | 0.038769 | 0.000747 | 0.001014 | 0.001372 | 0.00082  | 0.00246  | 0.000471 | 0.009678 |
| 0.00566  | 0.050734 | 0.13653  | 0.006115 | 0.00261  | 0.001845 | 0        | 0.001375 | 0.000352 | 0        | 0        | 0.001248 | 0.000957 | 0.000706 | 0.008056 |
| 0.001575 | 0.016103 | 0.013439 | 0.001439 | 0.022472 | 0.004273 | 0.000159 | 0.011334 | 0        | 0.003103 | 0.005558 | 0.003988 | 0.001    | 0        | 0.003912 |
| 0.000149 | 0.00111  | 0.002288 | 0.000413 | 0.000546 | 0.000211 | 0        | 0.001371 | 0        | 0        | 0        | 0.000176 | 0        | 0        | 0.000577 |
| 0.000246 | 0.000768 | 0.005322 | 0.002458 | 0.000905 | 0.000327 | 0.000154 | 0.004131 | 0.000291 | 0        | 0.000361 | 0.000181 | 0.000594 | 0        | 0.003453 |
| 0        | 0.001117 | 0        | 0.003719 | 0        | 0        | 0        | 0        | 0        | 0        | 0        | 0        | 0        | 0        | 0        |
| 0.00023  | 0.018771 | 0        | 0.060435 | 0.005344 | 0        | 0.000412 | 0.000172 | 0.000624 | 0.022646 | 0        | 0        | 0        | 0.445989 | 0.001171 |
| 0.000371 | 0.044773 | 0.007265 | 0.008092 | 0.003813 | 0.002966 | 0.000263 | 0.000225 | 0.000611 | 0.018312 | 0.000352 | 0.002426 | 0        | 0.00247  | 0.058765 |
| 2.17E-05 | 0.000837 | 0.000514 | 0.000813 | 0        | 0        | 0        | 0.000185 | 0        | 0.003036 | 0        | 0        | 0        | 0.001392 | 0.004563 |
| 0.000424 | 0.035004 | 0.006195 | 0.004428 | 0.033916 | 0        | 0        | 0.046378 | 0.000181 | 0.10225  | 0.0018   | 0        | 0.000681 | 0        | 0.057725 |
| 0.017443 | 0.167366 | 0.036924 | 0.014661 | 0.0734   | 0.002497 | 0.001209 | 0.238751 | 0.000777 | 0.276666 | 0.020513 | 0.002219 | 0.002928 | 0.432069 | 0.304596 |
| 0.00076  | 0.037445 | 0.067695 | 0.030755 | 0.000589 | 0.007706 | 0.000825 | 0.033435 | 0.002059 | 0.004319 | 0.001396 | 0.007881 | 0.006341 | 0.002686 | 0.013686 |
| 2.17E-05 | 0.000493 | 0.001126 | 0        | 0        | 0        | 0        | 0.000604 | 0        | 0.001126 | 0        | 0        | 0        | 0        | 0        |

| SP01     | SP08     | SP17     | SP24     | SP19     | SP37     | SP36     | SP35     | SP34     | SP33     | SP32     | SP30     | SP18     | SP29     | SP27     |
|----------|----------|----------|----------|----------|----------|----------|----------|----------|----------|----------|----------|----------|----------|----------|
| 0.001318 | 0        | 0        | 0.004352 | 0.029837 | 0.000105 | 0        | 0.004458 | 0.003301 | 0.00567  | 0.001122 | 0.004447 | 0.02049  | 0.003519 | 0.013502 |
| 0        | 0        | 0        | 0.000691 | 0.000354 | 0        | 0        | 0        | 0        | 0.000143 | 0        | 0        | 8.06E-05 | 0        | 0        |
| 0        | 0        | 0        | 0.00488  | 0.001577 | 0        | 0        | 0        | 0        | 0.003228 | 0        | 0        | 0.000726 | 0.001077 | 0        |
| 6.51E-05 | 0        | 0        | 0        | 0.000142 | 0        | 0        | 0        | 0        | 0        | 0        | 0.00016  | 0        | 0.000774 | 0.000415 |
| 0.000386 | 0        | 0        | 0.002156 | 0.000152 | 0.000148 | 0        | 0        | 0        | 0        | 0        | 0        | 0        | 0.001259 | 0.001245 |
| 0        | 0        | 0        | 0        | 0        | 0        | 0        | 0        | 0        | 5.38E-05 | 0        | 0        | 0        | 0        | 0        |
| 0        | 0        | 0        | 0.001326 | 0.000283 | 0        | 0.000433 | 0.000103 | 2.35E-05 | 0.000328 | 0        | 0        | 0        | 0.001744 | 0.001455 |
| 0        | 0.000564 | 0.024576 | 0.080568 | 0.016761 | 0.001305 | 0        | 0.004598 | 0.000426 | 0.014164 | 0        | 0.011358 | 0.004709 | 0.051394 | 0.015277 |
| 0        | 0        | 0.000194 | 0.000643 | 0        | 0        | 0        | 0        | 0        | 0        | 0        | 0        | 0        | 0.000933 | 0        |
| 0        | 0        | 0        | 0        | 0.000152 | 0        | 0.000439 | 0.000221 | 0        | 0.000246 | 0        | 0        | 0        | 0        | 0        |
| 0        | 0        | 0        | 0        | 0        | 0        | 0.001594 | 0.000461 | 4.41E-05 | 0.000256 | 0        | 0        | 0        | 0.00041  | 0        |
| 0        | 0        | 0        | 0        | 0.000613 | 0        | 0        | 0.002385 | 0        | 0        | 0        | 0.000127 | 0        | 0        | 0        |
| 4.57E-05 | 0.044812 | 0        | 0.003668 | 0.021387 | 0        | 0.00799  | 0.079324 | 0.015579 | 0.194894 | 0.02321  | 0.024765 | 0.02901  | 0.008661 | 0.000268 |
| 0        | 0.003294 | 0.000198 | 0        | 0.001927 | 0        | 0.001192 | 0.008601 | 0.000726 | 0.019737 | 5.54E-05 | 0.00169  | 0.001544 | 0        | 8.93E-05 |
| 0        | 0        | 0.000412 | 0        | 0.001075 | 0        | 0        | 0.001286 | 0        | 0.00012  | 0        | 0.000421 | 0.002275 | 0        | 8.93E-05 |
| 0.000622 | 0.012079 | 0.059933 | 0.010021 | 0.2333   | 0.001286 | 0.033176 | 0.261138 | 0.000567 | 0.012416 | 0.000346 | 0.055337 | 0.274021 | 0.017222 | 0.020573 |
| 0.000168 | 0.000712 | 0        | 0.005214 | 0.003726 | 0        | 0.034036 | 0.000346 | 9.70E-05 | 0.000817 | 0        | 0.000254 | 0.00381  | 0.001661 | 0.000126 |
| 0.00012  | 0.000653 | 0        | 0.001334 | 0.001186 | 0        | 0.000364 | 0.000498 | 0        | 5.12E-05 | 0        | 0        | 0.000116 | 0        | 0.000147 |
| 0.003162 | 0.000742 | 0        | 0.002993 | 0.017422 | 0        | 0.013111 | 0.060497 | 0.11227  | 0.03318  | 0.000539 | 0.076358 | 0.022109 | 0.002396 | 0.008842 |
| 0        | 0        | 0        | 0.00353  | 0        | 0        | 0        | 0        | 2.35E-05 | 0.00129  | 0        | 0.004807 | 0.001284 | 0.000796 | 0        |
| 0        | 0        | 0        | 0        | 0        | 0        | 0        | 0.010721 | 0.000129 | 0.018112 | 0.000142 | 0.002766 | 0.000418 | 0.000349 | 0        |
| 5.54E-05 | 0        | 0        | 0.002888 | 0.003143 | 0.000131 | 0        | 0        | 5.00E-05 | 0.002081 | 0        | 0.000286 | 0.00175  | 0        | 0        |
| 0.865275 | 0.000445 | 0.633434 | 0.03213  | 0.001031 | 0.000798 | 0.001205 | 0.110767 | 0.246873 | 0.03565  | 0.703349 | 0.019974 | 0.005903 | 0.259535 | 0.046752 |
| 0.000379 | 0        | 0.000601 | 0.001391 | 0        | 0        | 0        | 0.000115 | 0.001293 | 0.000172 | 0        | 0.000254 | 0        | 0.001987 | 0.000573 |
| 0.001039 | 0        | 0.000534 | 0.007784 | 0.020562 | 0.00025  | 0        | 0.00481  | 0.000138 | 0.000202 | 0        | 0.003731 | 5.97E-05 | 0.021993 | 0.000536 |
| 0.011412 | 0        | 0.007003 | 0.001367 | 0.002008 | 0.000238 | 0        | 0.004723 | 0.00037  | 0        | 0        | 0.002872 | 0        | 0.002032 | 0.001487 |
| 0.010907 | 0        | 0.000715 | 0        | 0.020619 | 0.000813 | 0        | 0.00924  | 0        | 0.000128 | 0        | 0.002332 | 0        | 0.000789 | 0        |
| 0.003192 | 0.000623 | 0.005685 | 0        | 0.016148 | 0.000682 | 0        | 0.011799 | 0.000118 | 0        | 0        | 0.003936 | 0.000119 | 0.000758 | 0.001261 |
| 7.20E-05 | 0        | 0        | 0.000781 | 0.000643 | 0        | 0        | 0        | 0        | 0        | 0        | 9.82E-05 | 0.000546 | 0        | 0        |
| 0        | 0        | 0        | 0        | 0.000131 | 0.000274 | 0        | 8.72E-05 | 0        | 6.40E-05 | 0        | 0        | 0        | 0        | 0        |
| 0.000105 | 0        | 7.89E-05 | 0.001578 | 0        | 0        | 0        | 0        | 2.65E-05 | 0        | 0        | 0.000573 | 0        | 0.000493 | 0.000651 |
| 0.000107 | 0        | 0        | 0.000561 | 0.0003   | 0.00012  | 0        | 0        | 0        | 4.35E-05 | 0        | 0.00025  | 0        | 0.000417 | 0.000478 |
| 0        | 0        | 6.60E-05 | 0        | 0.000886 | 0        | 0        | 0.002204 | 4.70E-05 | 6.91E-05 | 0        | 0.000385 | 0        | 0        | 0.000116 |
| 0.002051 | 0        | 0.015443 | 0.001391 | 0.074343 | 0.003064 | 0.000389 | 0.056643 | 0.002898 | 0.005785 | 0.001309 | 0.035968 | 0.021574 | 0.002829 | 0.00425  |
| 0.011182 | 0        | 0.065028 | 0.005702 | 0.220033 | 0.012053 | 0.001651 | 0.177972 | 0.015676 | 0.025272 | 0.007273 | 0.17515  | 0.121768 | 0.009881 | 0.020925 |
| 0        | 0        | 0.000555 | 0        | 0.000121 | 0.00052  | 0        | 8.72E-05 | 7.35E-05 | 0        | 0        | 0.000908 | 0        | 0.000766 | 0.000525 |
| 0        | 0        | 0        | 0.000708 | 0        | 0.000137 | 0        | 0        | 0        | 0        | 0        | 0        | 0        | 0        | 0        |
| 0        | 0        | 0.000363 | 0        | 0.000893 | 0        | 0        | 0        | 0        | 0        | 0        | 0.00036  | 0        | 0        | 0        |
| 0        | 0        | 0.000393 | 0        | 0.000923 | 0        | 0        | 0        | 0.000147 | 0        | 0        | 0.000667 | 0        | 0        | 0        |
| 0.000352 | 0        | 6.03E-05 | 0.009143 | 0.000253 | 0        | 0.011774 | 0        | 0        | 0        | 0        | 0        | 0        | 0.000432 | 0.000609 |
| 0.000111 | 0        | 0.000146 | 0.008085 | 0.000711 | 0.000926 | 0.00118  | 0        | 0.001173 | 0.00012  | 0        | 8.18E-05 | 0        | 0.001987 | 0.014967 |
| 0        | 0        | 0        | 0        | 0.000664 | 0.001021 | 0        | 0        | 0.000479 | 0.000125 | 0        | 0        | 0        | 0.00041  | 0.006725 |
| 0        | 0        | 0        | 0.000797 | 0.000852 | 0.000383 | 0.000389 | 0        | 0        | 5.38E-05 | 0        | 0        | 0        | 0.000372 | 0.000336 |
| 4.57E-05 | 0        | 0        | 0.001383 | 0.00032  | 0.000531 | 0.000797 | 0        | 0        | 0        | 0        | 0        | 0        | 0.003246 | 0        |
| 0        | 0        | 0        | 0        | 0.000158 | 0.000165 | 0        | 0.000115 | 0.001364 | 0        | 0        | 0.000687 | 0        | 0        | 0        |
| 0        | 0        | 0.000146 | 0        | 0.001024 | 0        | 0.006414 | 0.000803 | 0        | 0        | 0        | 0.00027  | 3.88E-05 | 0        | 0        |
| 0        | 0        | 0        | 0.001407 | 0.000441 | 0.000518 | 0.000364 | 0        | 0        | 0        | 0        | 0.000135 | 0        | 0.000887 | 0.000142 |
| 0.04383  | 0.000653 | 0        | 0.001586 | 0.076088 | 0.00264  | 0.002542 | 0.000455 | 0.005091 | 0.01304  | 0.00462  | 0.002958 | 0.001374 | 0        | 0.001545 |
| 0.000755 | 0        | 0        | 0        | 0.001472 | 0.000257 | 0        | 0.000103 | 4.41E-05 | 0        | 0        | 0        | 0        | 0        | 0.000168 |
| 0        | 0        | 0        | 0.028006 | 0.001156 | 0.010848 | 0        | 0        | 0.00047  | 0.001382 | 0        | 0.000102 | 0        | 0.011884 | 0.002007 |
| 0.000823 | 0        | 0.000452 | 0.007866 | 0.000431 | 0.006985 | 0        | 0        | 0.000764 | 0.000305 | 0.000168 | 0.00052  | 0.000385 | 0.001911 | 0.004266 |
| 0.014834 | 0        | 0.000759 | 0.171492 | 0.01133  | 0.312742 | 0        | 9.34E-05 | 0.00025  | 0.018716 | 6.29E-05 | 0.00106  | 0.000929 | 0.234198 | 0.000835 |
| 0.000331 | 0        | 0.046842 | 0.004921 | 0.039173 | 0.062695 | 0        | 0.024077 | 0.278586 | 0.076986 | 0.01934  | 0.252695 | 0.185028 | 0.022455 | 0.039039 |
| 0.000999 | 0        | 0.00086  | 0.006784 | 0.000175 | 0.091322 | 0        | 0.000243 | 0.002534 | 0.006541 | 0.000265 | 0.000847 | 0.00126  | 0.00041  | 0.029073 |
| 0.021842 | 0        | 0.045915 | 0.03653  | 0.029335 | 0.381733 | 0.000395 | 0.005725 | 0.068435 | 0.121708 | 0.001794 | 0.036712 | 0.028986 | 0.013226 | 0.553182 |
| 0.003134 | 0        | 0.0113   | 0.011729 | 0.002934 | 0.095427 | 0        | 0.000691 | 0.037756 | 0.017085 | 0.000497 | 0.008862 | 0.018376 | 0.010807 | 0.089148 |
| 0        | 0        | 0        | 0.000732 | 0        | 0        | 0        | 0        | 0        | 8.19E-05 | 0        | 0        | 0        | 0        | 0        |
| 0        | 0        | 0        | 0.002684 | 0        | 0        | 0        | 0        | 0        | 0        | 0        | 0        | 0        | 0.003943 | 0        |
| 0        | 0.000564 | 0        | 0.004864 | 0.002793 | 0        | 0        | 0        | 0        | 0.000428 | 0        | 0        | 0        | 0.013408 | 0.001045 |
| 0        | 0.004511 | 0.000128 | 0.000667 | 0.001017 | 0        | 0.000408 | 0.000202 | 0.000144 | 7.94E-05 | 0        | 0.000397 | 0        | 0.003018 | 0.000688 |
| 0        | 0        | 0        | 0.013592 | 0.001243 | 0.000139 | 0.003841 | 0.000327 | 0.00027  | 0.001006 | 0        | 0.000385 | 0        | 0.009798 | 0.002679 |
| 0        | 0        | 0        | 0.008028 | 0.000718 | 0        | 0.003195 | 0        | 0.001869 | 0.000543 | 0        | 0        | 0        | 0.006909 | 0.015225 |

|          |          |          |          |          |          |          |          |          |          |          |          |          |          |          |
|----------|----------|----------|----------|----------|----------|----------|----------|----------|----------|----------|----------|----------|----------|----------|
| 7.20E-05 | 0.003443 | 7.32E-05 | 0.03047  | 0.003767 | 0.002142 | 0.008887 | 0.000131 | 0.004315 | 0.012882 | 0.000305 | 0.000835 | 0.001484 | 0.016767 | 0.002017 |
| 0        | 0.017836 | 0        | 0.010078 | 0.000724 | 0.000387 | 0.00396  | 0.000118 | 0.00679  | 0.00705  | 0.002827 | 0.001039 | 0.000143 | 0.006772 | 0.00177  |
| 0        | 0        | 0        | 0.040581 | 0.000502 | 0.000113 | 0.03155  | 0        | 0.003304 | 0.002255 | 0.000869 | 0.000139 | 0.000119 | 0.03035  | 0.004586 |
| 0        | 0        | 6.75E-05 | 0.01735  | 0.000313 | 0.000903 | 0.001563 | 0.000128 | 0.003601 | 0.004669 | 0.000184 | 0.000237 | 0.00106  | 0.020643 | 0.002932 |
| 0        | 0.000683 | 0        | 0        | 0        | 0        | 0        | 0        | 2.65E-05 | 7.17E-05 | 1.95E-05 | 0        | 0        | 0        | 0        |
| 0.000119 | 0        | 0.000207 | 0        | 0.00282  | 0        | 0        | 0.00485  | 0.003398 | 0.002145 | 0.013616 | 0.019295 | 0.000466 | 0.000887 | 0.000452 |
| 0        | 0        | 0        | 0.002261 | 0.00127  | 0.000143 | 0.001142 | 0.000557 | 5.29E-05 | 0.003855 | 0        | 0.000278 | 0.000391 | 0.014697 | 0.000935 |
| 0        | 0        | 0.002172 | 0.006556 | 0.024247 | 0.000242 | 0.067073 | 0.015179 | 0.000797 | 0.063484 | 2.24E-05 | 0.020498 | 0.005214 | 0.037645 | 0.019312 |
| 0        | 0        | 7.46E-05 | 0.007012 | 0.002854 | 0        | 0.001556 | 0.000227 | 3.23E-05 | 0.002591 | 0        | 0        | 9.26E-05 | 0.001183 | 0        |
| 0.000133 | 0.000683 | 0.025141 | 0.013625 | 0.002453 | 0.001958 | 0.023065 | 0.005881 | 0.00512  | 0.018844 | 0.000305 | 0.050623 | 0.004497 | 0.009768 | 0.012609 |
| 0        | 0        | 7.61E-05 | 0.247635 | 0.034719 | 0.001992 | 0.000414 | 0.001102 | 0.002196 | 0.084307 | 0.000186 | 0.005217 | 0.002831 | 0.091648 | 0.030098 |
| 0.000586 | 0        | 0.026589 | 0.00144  | 0.000691 | 0.000492 | 0.001167 | 0.008605 | 0.011064 | 0.010498 | 0.000109 | 0.013019 | 0.010036 | 0.002002 | 0.004313 |
| 0        | 0        | 0.000224 | 0        | 0        | 0.000141 | 0.003025 | 0.000137 | 6.17E-05 | 8.45E-05 | 0        | 0.000106 | 0        | 0        | 0.000205 |
| 0        | 0        | 0.00028  | 0.003603 | 0.000131 | 0        | 0.005787 | 0.000386 | 6.17E-05 | 0.000197 | 3.44E-05 | 0.000393 | 0        | 0.00041  | 0.000378 |
| 0        | 0        | 0        | 0        | 0        | 0        | 0.001958 | 0        | 0        | 0        | 0        | 0        | 0        | 0        | 0        |
| 0        | 0.000534 | 0        | 0        | 0.008005 | 0.000274 | 0.00841  | 0        | 6.17E-05 | 0.003054 | 2.39E-05 | 0.002569 | 0.00585  | 0.008137 | 0.00011  |
| 0        | 0.002226 | 0        | 0.082805 | 0.002348 | 0        | 0.194592 | 0.000794 | 0.005594 | 0.004902 | 0.001395 | 0.00081  | 0.000119 | 0.008539 | 0.017426 |
| 0        | 0        | 0        | 0.000765 | 0        | 0        | 0.003427 | 0        | 0.000147 | 0.000108 | 0        | 0        | 0        | 0        | 0        |
| 0        | 0        | 0.007311 | 0        | 0.001247 | 0        | 0.060948 | 0.000567 | 0.034982 | 0.014121 | 0.009822 | 0.077308 | 0.002998 | 0.001653 | 0.000116 |
| 0.000133 | 0.006707 | 0.015765 | 0.007638 | 0.044823 | 0.000659 | 0.314015 | 0.083879 | 0.070001 | 0.026549 | 0.127684 | 0.040603 | 0.175917 | 0.008061 | 0.000562 |
| 0.000235 | 0.898237 | 0.000198 | 0.030226 | 0.005121 | 0.000295 | 0.139262 | 0.031545 | 0.0482   | 0.105959 | 0.078506 | 0.031083 | 0.040091 | 0.007864 | 0.000914 |
| 0        | 0        | 0        | 0        | 0        | 0        | 0.001318 | 0        | 6.76E-05 | 0        | 0        | 0        | 0        | 0        | 0        |

| SP26     | SP25     | SP23     | SP22     | SP21     | SP20     | SP28     | SP31     |          |
|----------|----------|----------|----------|----------|----------|----------|----------|----------|
| 0.002573 | 0.021107 | 0.006814 | 0.003976 | 0.003163 | 0.000766 | 0.001512 | 0.033872 | 0.004255 |
| 0        | 0        | 0.00017  | 0        | 0        | 0        | 0        | 0        | 0        |
| 0        | 0        | 0.000179 | 0        | 0        | 0        | 0        | 0        | 0        |
| 0        | 0.000164 | 0.002842 | 0.00021  | 0.005585 | 0        | 0.000341 | 0.026302 | 0        |
| 0        | 0.001979 | 0.003977 | 0.002842 | 0.009754 | 0        | 9.49E-05 | 0.045829 | 0        |
| 0        | 0.000378 | 0        | 0.000241 | 0.005513 | 0        | 0.000202 | 0.014942 | 0        |
| 0        | 0.001021 | 0.001125 | 0.001949 | 0.010599 | 0.00045  | 0.002215 | 0.027348 | 0        |
| 0.57997  | 0.020452 | 0.000407 | 0.211578 | 0.039387 | 0        | 0.009202 | 0.091658 | 0.004432 |
| 0.001048 | 0        | 0        | 0.001481 | 0.002084 | 0        | 0        | 0        | 0        |
| 0        | 0        | 0        | 0        | 0        | 0        | 0        | 0        | 0        |
| 0        | 0        | 0        | 0        | 0        | 0        | 0.000161 | 0.000929 | 0        |
| 0        | 0.000233 | 0.000194 | 0.001907 | 0.004306 | 0.002361 | 0.005714 | 0.00662  | 0        |
| 0.000483 | 0.040979 | 0.000504 | 0.020844 | 0.036996 | 0.006144 | 0.03674  | 0.074121 | 0.001724 |
| 0        | 0.002943 | 0        | 0.002457 | 0.006479 | 0.00034  | 0.003788 | 0.013505 | 0.000168 |
| 0        | 0.00121  | 0        | 0.000519 | 0        | 0        | 0        | 0        | 0        |
| 0.001048 | 0.219787 | 0.012329 | 0.04798  | 0.002181 | 0.000805 | 0.006483 | 0.010917 | 0.000664 |
| 0        | 0.00387  | 0.001164 | 0        | 0        | 0.000379 | 0.000187 | 0.000936 | 0        |
| 0        | 0.002924 | 0.000155 | 0.000285 | 0        | 0        | 0        | 0        | 0        |
| 0.013451 | 0.000139 | 0.000238 | 0.322169 | 0.03117  | 0        | 0.019845 | 0.000944 | 0.002584 |
| 0        | 0.000718 | 0.000553 | 0        | 0        | 0        | 0.000209 | 0.000988 | 0        |
| 0        | 0.00012  | 0.000189 | 0.002045 | 0        | 0        | 0.010721 | 0        | 0        |
| 0        | 0        | 0        | 0        | 0        | 0        | 0.000385 | 0        | 0        |
| 0.021659 | 0.046084 | 0.0435   | 0.006482 | 0.047515 | 0.043519 | 0.043642 | 0.015296 | 0.000111 |
| 0        | 0.000378 | 0        | 0.001409 | 0        | 0.011079 | 0.000721 | 0.001865 | 0        |
| 0.048174 | 0.00808  | 0.007241 | 0.001347 | 0.009601 | 0        | 0.002023 | 0.003745 | 0.000213 |
| 0.001048 | 0.003132 | 0.000815 | 0.003667 | 0.004346 | 0.002882 | 0.012603 | 0.00275  | 0        |
| 0.014927 | 0.0075   | 0.001125 | 0.00134  | 0.026397 | 0.009934 | 0.021571 | 0.002794 | 0        |
| 0.009098 | 0.012592 | 0.000204 | 0.001526 | 0.005223 | 0.005717 | 0.023436 | 0        | 0        |
| 0.000504 | 0.001809 | 0        | 0        | 0        | 0.001342 | 0.000762 | 0.002757 | 0        |
| 0.009602 | 0        | 0        | 0.003244 | 0.003227 | 0        | 0.000226 | 0.001806 | 0        |
| 0.000497 | 0.002609 | 0.000723 | 0.001481 | 0.004394 | 0.000419 | 0.00352  | 0.006214 | 0        |
| 0.001435 | 0.001141 | 0.000189 | 0.00201  | 0.018712 | 0.001745 | 0.004937 | 0.006428 | 0        |
| 0.007132 | 0.002445 | 0        | 0.004433 | 0.003155 | 0.001832 | 0.002766 | 0.005366 | 0        |
| 0.025653 | 0.042775 | 0.001028 | 0.029769 | 0.017384 | 0.020982 | 0.117597 | 0.017434 | 0        |
| 0.071241 | 0.1815   | 0.006203 | 0.106061 | 0.060762 | 0.063584 | 0.48112  | 0.079355 | 0.000238 |
| 0        | 0.000328 | 0.00017  | 0.001237 | 0        | 0        | 0.002756 | 0        | 0        |
| 0        | 0.000574 | 0        | 0        | 0        | 0.000529 | 0        | 0        | 0        |
| 0        | 0.000189 | 0        | 0.00044  | 0.001135 | 0.002677 | 0        | 0        | 0        |
| 0        | 0        | 0        | 0.000708 | 0        | 0.008205 | 0.000248 | 0        | 0        |
| 0        | 0.004153 | 0.001208 | 0.004014 | 0.002237 | 0        | 0.000721 | 0.012075 | 0.000209 |
| 0.01223  | 0.008029 | 0.010365 | 0.01849  | 0.03422  | 0.000474 | 0.003795 | 0.061722 | 0        |
| 0.002352 | 0.003769 | 0.004166 | 0.018606 | 0.03723  | 0        | 0.001405 | 0.043802 | 0        |
| 0.009312 | 0.001229 | 0.000243 | 0.002681 | 0.001103 | 0        | 0.000314 | 0.004401 | 0        |
| 0.017589 | 0.000782 | 0.000718 | 0.001244 | 0        | 0        | 0        | 0.002764 | 0        |
| 0        | 0        | 0.001339 | 0.001254 | 0.001086 | 0        | 0.000131 | 0        | 0.001044 |
| 0        | 0        | 0        | 0.000485 | 0.001078 | 0        | 0        | 0        | 0        |
| 0        | 0.000485 | 0        | 0.000485 | 0.001038 | 0        | 0        | 0        | 0        |
| 0        | 0.003599 | 0.000761 | 0.000258 | 0        | 0.002867 | 0.001446 | 0.000958 | 0        |
| 0        | 0.000372 | 0.000383 | 0        | 0        | 0.000805 | 0.000105 | 0.000899 | 0        |
| 0.000483 | 0.001128 | 0.01279  | 0.000711 | 0.025327 | 0.000497 | 0.000207 | 0.002845 | 0.000119 |
| 0.000586 | 0.014521 | 0.010738 | 0.001849 | 0.011967 | 0        | 0.001254 | 0.000936 | 0.00034  |
| 0        | 0.026023 | 0.329526 | 0.006997 | 0.142304 | 0.000395 | 0.018068 | 0.001865 | 0        |
| 0        | 0.007557 | 0.33345  | 0.010083 | 0.074758 | 0        | 0.055756 | 0.006575 | 0.042407 |
| 0        | 0.007569 | 0.013241 | 0.00054  | 0.008555 | 0        | 0.001938 | 0.000818 | 0        |
| 0.002297 | 0.106582 | 0.055557 | 0.025995 | 0.052634 | 0.000403 | 0.05097  | 0.011595 | 0.000373 |
| 0.000428 | 0.015977 | 0.040512 | 0.005341 | 0.012056 | 0.00049  | 0.011203 | 0.000907 | 0.002277 |
| 0        | 0        | 0        | 0        | 0        | 0        | 0        | 0        | 0.000258 |
| 0        | 0        | 0.000349 | 0        | 0        | 0        | 0        | 0        | 0        |
| 0.001504 | 0        | 0.000422 | 0.000251 | 0        | 0.000805 | 0        | 0        | 0.00061  |
| 0.013292 | 0.001777 | 0.000757 | 0.000876 | 0.001135 | 0.000829 | 0.000343 | 0.008138 | 0.000336 |
| 0.00498  | 0.002313 | 0.004506 | 0.001653 | 0.021657 | 0.005709 | 0.000555 | 0.034204 | 0.000332 |
| 0.000497 | 0.00058  | 0.002401 | 0        | 0        | 0.00045  | 0        | 0.002676 | 0.02086  |

|          |          |          |          |          |          |          |          |          |
|----------|----------|----------|----------|----------|----------|----------|----------|----------|
| 0.001449 | 0.002288 | 0.008531 | 0.001217 | 0.030566 | 0.025285 | 7.79E-05 | 0.020272 | 0.020548 |
| 0.000973 | 0.002187 | 0.004937 | 0.000241 | 0.007855 | 0.007565 | 0.000129 | 0.015775 | 0.003326 |
| 0.00051  | 0.000662 | 0.00922  | 0.000684 | 0.031894 | 0.007936 | 0.00026  | 0.012583 | 0.000524 |
| 0        | 0.001418 | 0.005388 | 0        | 0.035982 | 0.005615 | 0        | 0.004541 | 0.003981 |
| 0        | 0        | 0.000155 | 0        | 0        | 0        | 0        | 0        | 0        |
| 0        | 0.001815 | 0.000175 | 0        | 0        | 0        | 0.000589 | 0        | 0        |
| 0.014568 | 0.000725 | 0.000369 | 0.00076  | 0        | 0        | 0.000409 | 0.000826 | 0.000135 |
| 0.058025 | 0.008244 | 0.003589 | 0.011437 | 0.003163 | 0.000482 | 0.004492 | 0.009273 | 0.000287 |
| 0        | 0        | 0.000179 | 0        | 0        | 0        | 0.000148 | 0.000921 | 0        |
| 0.016948 | 0.046784 | 0.002983 | 0.016771 | 0.009666 | 0        | 0.008474 | 0.076391 | 0.000111 |
| 0.002345 | 0.012183 | 0.021001 | 0.000955 | 0.017327 | 0        | 0.001217 | 0.005536 | 0.000172 |
| 0.014568 | 0.03058  | 0.002289 | 0.037897 | 0        | 0.004383 | 0.008221 | 0.00892  | 0        |
| 0.002538 | 0.002326 | 0.000213 | 0.003176 | 0.001078 | 0        | 0.000991 | 0.00732  | 0        |
| 0        | 0.003536 | 0.000388 | 0.016424 | 0.001159 | 0        | 0.001648 | 0.013121 | 0        |
| 0        | 0        | 0        | 0        | 0        | 0.016717 | 0        | 0        | 0.006144 |
| 0        | 0        | 0.007566 | 0.002578 | 0.002125 | 0.590398 | 0.002196 | 0.001769 | 0.705556 |
| 0.001987 | 0.000347 | 0.00341  | 0.00067  | 0.010985 | 0.033908 | 0        | 0.02827  | 0.009269 |
| 0        | 0        | 0        | 0.000426 | 0.002189 | 0.004454 | 0        | 0        | 0        |
| 0.000552 | 0.000845 | 0.005922 | 0.008173 | 0.007412 | 0        | 0.000253 | 0        | 0.000233 |
| 0.007732 | 0.005092 | 0.006979 | 0.008777 | 0.046871 | 0.09878  | 0.002634 | 0.00359  | 0.113367 |
| 0.002711 | 0.045214 | 0.001237 | 0.002364 | 0.004273 | 0.005062 | 0.004321 | 0.098992 | 0.052794 |
| 0        | 0.000151 | 0        | 0        | 0        | 0        | 0        | 0        | 0        |

Table S15. The abundance and composition at the genus level of each sample among CP (n=72), SP (n=37), CPR (n=22), and SPR (n=37) groups.

| ID                              | CP65     | CP58     | CP21     | CP54     | CP19     | CP12     | CP59     | CP56     | CP10     | CP57     | CP44     | CP32     | CP53     |
|---------------------------------|----------|----------|----------|----------|----------|----------|----------|----------|----------|----------|----------|----------|----------|
| Neisseria                       | 0.934035 | 0.861216 | 0.825581 | 0.786058 | 0.775247 | 0.767602 | 0.736433 | 0.683173 | 0.638654 | 0.455863 | 0.439546 | 0.394477 | 0.367488 |
| Prevotella                      | 0.006073 | 0.003372 | 0.007827 | 0.015172 | 0.013275 | 0.031995 | 0.03329  | 0.077049 | 0.054304 | 0.240362 | 0.06927  | 0.336191 | 0.152678 |
| Veillonella                     | 0.006544 | 0.009358 | 0.010923 | 0.021385 | 0.02415  | 0.023366 | 0.026185 | 0.044536 | 0.023049 | 0.152148 | 0.078144 | 0.032066 | 0.067238 |
| Leptotrichia                    | 0.01149  | 0.004952 | 0.002409 | 0.024983 | 0.011946 | 0.021325 | 0.015057 | 0.094784 | 0.009979 | 0.015131 | 0.065267 | 0.145019 | 0.023001 |
| Streptococcus                   | 3.63E-04 | 0.004918 | 0.00451  | 0.018535 | 0.025945 | 0.016333 | 0.017212 | 0.01604  | 0.011591 | 0.009733 | 0.016244 | 0.004261 | 0.027461 |
| Fusobacterium                   | 0.013418 | 0.034236 | 0.05503  | 0.005503 | 0.035324 | 0.038897 | 0.03052  | 0.010626 | 0.082902 | 0.009008 | 0.160813 | 0.004136 | 0.087079 |
| Actinomyces                     | 0.001939 | 0.001713 | 0.006017 | 0.009103 | 0.004251 | 0.010884 | 0.03789  | 0.010495 | 0.002757 | 0.049316 | 0.002384 | 0.010264 | 7.09E-04 |
| Rothia                          | 0.001585 | 0.003152 | 0.010268 | 0.007463 | 0.005787 | 0.002531 | 0.022933 | 0.002079 | 0.006694 | 0.012576 | 0.053749 | 0.002949 | 0.044582 |
| Porphyromonas                   | 3.33E-04 | 0.009357 | 0.0269   | 0.003578 | 0.027621 | 0.033819 | 0.026403 | 4.90E-04 | 0.068554 | 6.54E-04 | 0.004791 | 0.002182 | 0.11163  |
| Haemophilus                     | 0.003603 | 0.007118 | 0.006135 | 0.013471 | 0.003193 | 0.00202  | 0.004248 | 0.002893 | 0.02234  | 9.10E-04 | 1.42E-04 | 8.97E-04 | 0.011749 |
| Bacteria_unclassified           | 0.002513 | 0.019785 | 0.011855 | 0.035367 | 0.02256  | 0.017078 | 0.003262 | 0.023731 | 0.023871 | 0.019487 | 0.022231 | 0.011595 | 0.007079 |
| Lachnoanaerobaculum             | 0.004357 | 0.010462 | 0.004059 | 0.009421 | 0.007395 | 0.004812 | 0.00687  | 0.005804 | 0.00807  | 0.002569 | 0.017526 | 0.006496 | 0.015907 |
| Granulicatella                  | 0.001789 | 6.69E-04 | 4.23E-04 | 5.81E-04 | 4.61E-04 | 0.001238 | 0.011256 | 2.43E-04 | 0.001895 | 1.30E-04 | 0.005398 | 0.001466 | 0.00461  |
| Capnocytophaga                  | 9.80E-05 | 0.002231 | 5.58E-04 | 8.51E-04 | 0.009089 | 5.12E-04 | 0.002083 | 2.33E-04 | 0.002017 | 2.64E-04 | 0.00593  | 0        | 0.007182 |
| Candidate_division_TM7_no rank  | 1.16E-04 | 2.13E-04 | 5.67E-04 | 0.003214 | 6.06E-04 | 0.001175 | 0.00218  | 8.57E-04 | 0        | 0.00127  | 1.36E-04 | 6.04E-04 | 0.011908 |
| Actinobacteria_unclassified     | 2.53E-04 | 4.84E-04 | 0.00146  | 0.002278 | 9.00E-04 | 8.50E-04 | 0.001558 | 9.55E-04 | 3.99E-04 | 0.006201 | 0.00118  | 0.001155 | 4.61E-04 |
| Peptostreptococcus              | 3.50E-05 | 9.36E-04 | 0.001067 | 0        | 0.001293 | 0.001362 | 8.01E-04 | 0.001375 | 0.003534 | 0.001025 | 0.007869 | 7.32E-04 | 0.004737 |
| Oribacterium                    | 2.21E-04 | 0.001665 | 7.77E-04 | 8.65E-04 | 0.001459 | 7.57E-04 | 0.002705 | 6.27E-04 | 0.002548 | 0.003372 | 0.006449 | 0.004449 | 0.00483  |
| Stomatobaculum                  | 2.21E-04 | 3.13E-04 | 0.004256 | 0        | 0.011083 | 0.004521 | 0.001725 | 2.50E-04 | 0.004052 | 2.50E-04 | 0.015372 | 0.002313 | 0.004531 |
| Gemella                         | 0        | 4.38E-04 | 1.21E-04 | 0        | 3.41E-04 | 4.14E-04 | 0.001968 | 5.09E-04 | 3.04E-04 | 0        | 0.001893 | 1.44E-04 | 7.50E-04 |
| Megasphaera                     | 6.00E-05 | 2.36E-04 | 1.91E-04 | 0        | 2.53E-04 | 5.50E-05 | 1.65E-04 | 6.30E-04 | 1.03E-04 | 0.007871 | 0        | 0.002339 | 0.001454 |
| Family_XIII_incertae_sedis      | 1.71E-04 | 9.25E-04 | 5.78E-04 | 4.26E-04 | 1.72E-04 | 0.002412 | 0.001671 | 0.001007 | 0.001026 | 5.19E-04 | 0.002529 | 0.00191  | 0.002518 |
| Firmicutes_unclassified         | 1.04E-04 | 8.03E-04 | 6.22E-04 | 0.001455 | 0.001438 | 0.001743 | 4.03E-04 | 0.001006 | 0.002017 | 0.001869 | 0.003793 | 0.001159 | 5.69E-04 |
| Proteobacteria_unclassified     | 0.002562 | 0.009591 | 0.007687 | 0.016702 | 0.001828 | 0.002512 | 1.59E-04 | 0.0011   | 0.012024 | 9.05E-04 | 0        | 0.00133  | 8.18E-04 |
| Pasteurellaceae_unclassified    | 0.003936 | 0.004666 | 0.004457 | 0.006163 | 0.002363 | 0.001592 | 8.95E-04 | 0.00149  | 0.008427 | 2.46E-04 | 0        | 4.17E-04 | 0.001093 |
| Solobacterium                   | 2.82E-04 | 0.001087 | 6.15E-04 | 2.93E-04 | 4.29E-04 | 0.001688 | 0.002111 | 1.23E-04 | 0        | 0.001434 | 2.67E-04 | 0.001184 | 0.002479 |
| Alloprevotella                  | 7.11E-04 | 3.33E-04 | 0.001047 | 0.001448 | 1.63E-04 | 3.62E-04 | 0.001317 | 0.002247 | 0.001216 | 0.001279 | 0        | 0.0097   | 0.011014 |
| Lautropia                       | 0        | 0        | 2.44E-04 | 5.65E-04 | 1.82E-04 | 6.30E-05 | 0.001109 | 0        | 9.60E-05 | 1.28E-04 | 0        | 0        | 0.002567 |
| Campylobacter                   | 4.86E-04 | 0        | 1.14E-04 | 2.85E-04 | 2.73E-04 | 1.89E-04 | 9.14E-04 | 1.25E-04 | 3.27E-04 | 0        | 1.22E-04 | 8.60E-04 | 1.02E-04 |
| Selenomonas                     | 0        | 2.34E-04 | 5.80E-05 | 7.19E-04 | 4.33E-04 | 2.10E-04 | 9.40E-05 | 0.006677 | 1.00E-04 | 0.0013   | 1.31E-04 | 0.006546 | 0        |
| Lactobacillales_unclassified    | 8.50E-05 | 2.23E-04 | 1.23E-04 | 5.55E-04 | 9.00E-05 | 7.59E-04 | 5.18E-04 | 3.90E-04 | 5.98E-04 | 2.55E-04 | 0.001739 | 4.22E-04 | 3.35E-04 |
| Atopobium                       | 5.70E-05 | 0        | 0        | 1.42E-04 | 9.80E-05 | 2.99E-04 | 4.71E-04 | 0        | 1.99E-04 | 5.10E-04 | 1.38E-04 | 2.85E-04 | 2.22E-04 |
| Lachnospiraceae_uncultured      | 0        | 0        | 6.10E-05 | 0.001417 | 8.70E-04 | 1.77E-04 | 3.10E-05 | 0.001295 | 3.03E-04 | 0        | 0.003474 | 0.00574  | 4.70E-05 |
| Ruminococcaceae_unculture d     | 5.40E-05 | 0        | 0        | 8.46E-04 | 2.64E-04 | 4.38E-04 | 0.001018 | 3.93E-04 | 3.05E-04 | 2.45E-04 | 3.99E-04 | 1.35E-04 | 7.47E-04 |
| Halomonas                       | 1.28E-04 | 1.15E-04 | 0        | 0        | 1.90E-04 | 0        | 3.80E-05 | 0        | 0        | 0        | 0        | 1.41E-04 | 1.50E-05 |
| Shuttleworthia                  | 0        | 0        | 5.90E-05 | 0        | 0        | 5.80E-05 | 0        | 0        | 0        | 0        | 1.49E-04 | 9.00E-04 | 0        |
| Neisseriaceae_unclassified      | 0.001735 | 0.002509 | 1.89E-04 | 0.008257 | 5.34E-04 | 5.39E-04 | 2.62E-04 | 0.001303 | 0.002121 | 2.55E-04 | 0.001361 | 7.32E-04 | 4.07E-04 |
| Corynebacterium                 | 0        | 0        | 0        | 0        | 3.20E-04 | 0        | 3.88E-04 | 2.35E-04 | 0        | 0        | 0        | 2.74E-04 | 2.00E-05 |
| Tannerella                      | 1.19E-04 | 1.18E-04 | 6.10E-05 | 0        | 0        | 0.001165 | 1.69E-04 | 3.56E-04 | 0        | 0        | 0        | 0        | 0.004617 |
| Bacilli_unclassified            | 9.70E-05 | 2.25E-04 | 0        | 1.50E-04 | 3.43E-04 | 2.39E-04 | 5.00E-05 | 3.74E-04 | 2.08E-04 | 0        | 9.55E-04 | 0        | 5.70E-05 |
| PSD1-392_norank                 | 5.60E-05 | 0        | 0        | 1.39E-04 | 1.77E-04 | 4.35E-04 | 1.89E-04 | 0        | 3.92E-04 | 0        | 9.53E-04 | 1.56E-04 | 6.80E-05 |
| Parvimonas                      | 0        | 0        | 8.50E-05 | 0        | 1.60E-04 | 0        | 1.37E-04 | 0        | 0        | 0        | 0        | 0        | 0.003695 |
| Candidate_division_SR1_norank   | 0        | 0        | 4.43E-04 | 1.42E-04 | 1.75E-04 | 3.09E-04 | 6.40E-05 | 2.51E-04 | 0        | 6.30E-04 | 0        | 0        | 0.001276 |
| Betaproteobacteria_unclassified | 0        | 7.96E-04 | 1.96E-04 | 4.39E-04 | 6.70E-04 | 6.90E-05 | 0        | 1.27E-04 | 4.01E-04 | 1.30E-04 | 0        | 1.40E-04 | 4.16E-04 |
| Abiotrophia                     | 0        | 0        | 0        | 0        | 0        | 6.20E-05 | 0        | 0        | 0        | 0        | 0        | 0        | 5.05E-04 |
| Kingella                        | 0        | 0        | 0        | 0        | 0        | 0        | 0        | 0        | 0        | 0        | 0        | 0        | 0        |
| Dialister                       | 0        | 0        | 0        | 0        | 9.60E-05 | 6.30E-05 | 2.40E-05 | 0        | 0        | 0.001009 | 0        | 1.38E-04 | 2.10E-05 |
| Clostridiales_unclassified      | 0        | 0        | 0        | 1.54E-04 | 0        | 1.86E-04 | 0        | 0        | 2.02E-04 | 0        | 5.39E-04 | 1.50E-04 | 1.50E-05 |
| Olsenella                       | 0        | 0        | 0        | 0        | 0        | 0        | 0        | 0        | 0        | 0        | 0        | 0        | 0        |
| Moraxella                       | 0        | 0        | 0        | 0        | 0        | 0        | 0        | 0        | 0        | 0        | 0        | 0        | 0        |
| Others                          | 3.71E-04 | 0.001551 | 0.002427 | 0.001875 | 0.006553 | 0.002885 | 0.003224 | 0.004122 | 0.002421 | 0.001146 | 0.009117 | 0.003946 | 0.009313 |

| CP51     | CP61     | CP63     | CP27     | CP62     | CP26     | CP42     | CP16     | CP30     | CP48     | CP05     | CP11     | CP09     | CP06     | CP67     |
|----------|----------|----------|----------|----------|----------|----------|----------|----------|----------|----------|----------|----------|----------|----------|
| 0.336212 | 0.260244 | 0.246413 | 0.243302 | 0.2216   | 0.2143   | 0.197106 | 0.180118 | 0.145747 | 0.140262 | 0.119901 | 0.117656 | 0.115168 | 0.104441 | 0.093364 |
| 0.051598 | 0.036666 | 0.061147 | 0.160133 | 0.144195 | 0.100825 | 0.078296 | 0.13732  | 0.134483 | 0.098093 | 0.033624 | 0.178377 | 0.203374 | 0.028575 | 0.093937 |
| 0.073871 | 0.040642 | 0.02341  | 0.174633 | 0.092678 | 0.308437 | 0.055233 | 0.232746 | 0.081735 | 0.07666  | 0.040781 | 0.128078 | 0.097794 | 0.14498  | 0.266841 |
| 0.150454 | 0.06385  | 0.114784 | 0.110427 | 0.103622 | 0.007714 | 0.009432 | 0.241701 | 0.016726 | 0.528556 | 0.095833 | 0.014657 | 0.277794 | 0.154313 | 0.027343 |
| 0.047746 | 0.046753 | 0.080196 | 0.010766 | 0.052395 | 0.155635 | 0.165084 | 0.019311 | 0.270862 | 0.006984 | 0.067937 | 0.079217 | 0.043517 | 0.135998 | 0.095008 |
| 0.069108 | 0.137946 | 0.311809 | 0.034427 | 0.036577 | 9.20E-04 | 0.030159 | 0.024601 | 0.022906 | 0.003259 | 0        | 0.018491 | 0.001809 | 0.001379 | 0.021191 |
| 0.01384  | 0.001175 | 0.010108 | 0.134697 | 0.013187 | 0.028837 | 0.07701  | 0.049657 | 0.021604 | 0.077178 | 0.033045 | 0.055    | 0.069591 | 0.062126 | 0.002701 |
| 0.033838 | 0.030993 | 0.05727  | 0.006995 | 0.090402 | 0.057737 | 0.054753 | 0.014631 | 0.049424 | 0.006777 | 0.121098 | 0.194546 | 0.085923 | 0.044123 | 0.089841 |
| 0.038091 | 0.152448 | 0.001277 | 0.021848 | 0.049365 | 0.004374 | 0.00573  | 0.001108 | 0.016517 | 0.001244 | 0.357624 | 0.023663 | 2.35E-04 | 0.005214 | 0.0713   |
| 0.047924 | 0.021368 | 0.022902 | 0.011339 | 0.005449 | 0.002369 | 0.010149 | 5.33E-04 | 1.21E-04 | 6.72E-04 | 0.010825 | 0.007208 | 0.005487 | 0.09145  | 0.011135 |
| 1.10E-05 | 0.005195 | 0.002425 | 0.027051 | 0.004174 | 0.006836 | 0.029343 | 0.012446 | 5.48E-04 | 0.008626 | 0.028333 | 0.015643 | 0.00532  | 0.006282 | 3.30E-05 |
| 0.010798 | 0.010032 | 0.010047 | 0.012239 | 0.017905 | 0.011204 | 0.018661 | 0.009243 | 0.008538 | 0.001027 | 0.009933 | 0.017579 | 0.012134 | 0.009932 | 0.001422 |
| 0.027964 | 0.020361 | 0.02484  | 0.003856 | 0.019448 | 0.024619 | 0.084443 | 0.001957 | 0.060747 | 0.004275 | 0.004345 | 0.005506 | 0.007674 | 0.114939 | 0.099473 |
| 0.011854 | 0.030096 | 0.00181  | 1.80E-04 | 0.00272  | 8.70E-05 | 3.60E-04 | 4.99E-04 | 0.00146  | 0        | 0.005671 | 5.24E-04 | 3.42E-04 | 0.007508 | 0.004501 |
| 0.006757 | 0.008009 | 0.001714 | 0.00468  | 0.055916 | 0.007489 | 0.002205 | 0.012882 | 0.055648 | 7.02E-04 | 0        | 0.001497 | 0.002066 | 3.91E-04 | 1.08E-04 |
| 0        | 5.60E-05 | 3.57E-04 | 0.007547 | 0.00209  | 0.002568 | 0.014518 | 0.005527 | 1.13E-04 | 0.003644 | 0.017349 | 0.013512 | 0.009288 | 0.00235  | 0        |
| 0.00303  | 0.014816 | 0.004998 | 4.30E-04 | 0.004591 | 0.006636 | 0.001984 | 5.72E-04 | 0.012609 | 8.58E-04 | 0.027714 | 0.015726 | 1.25E-04 | 0.007914 | 0.003755 |
| 0.001214 | 0.019162 | 0.001556 | 0.001979 | 0.007764 | 0.018613 | 0.004329 | 0.003553 | 0.012809 | 0.001293 | 5.60E-05 | 0.005472 | 0.003022 | 0.016127 | 1.46E-04 |
| 5.06E-04 | 0.01569  | 3.46E-04 | 0.003539 | 0.003717 | 0.004209 | 0.002105 | 0.003211 | 3.36E-04 | 0.001014 | 7.60E-05 | 0.042084 | 0.004092 | 0.001644 | 6.97E-04 |
| 0.011854 | 0.006066 | 0.002016 | 3.19E-04 | 0.001498 | 0.003037 | 0.002956 | 5.10E-04 | 0.017063 | 9.28E-04 | 0        | 0.010446 | 0.002093 | 5.03E-04 | 5.10E-04 |
| 1.26E-04 | 1.33E-04 | 1.52E-04 | 0.003193 | 0.005475 | 0.00314  | 0.002    | 0.010593 | 0.00144  | 0.00143  | 0        | 3.50E-05 | 0.003669 | 0.003469 | 0.006595 |
| 0.001664 | 0.004185 | 0.001321 | 0.004536 | 0.002411 | 0.005555 | 0.003496 | 0.003036 | 0.007764 | 0.001439 | 3.19E-04 | 0.001299 | 2.77E-04 | 0.002301 | 6.60E-05 |
| 1.50E-05 | 4.03E-04 | 3.59E-04 | 0.005728 | 0.00104  | 0.004682 | 0.013327 | 0.003903 | 3.59E-04 | 0.003324 | 0.002991 | 0.004899 | 0.001458 | 0.008153 | 0        |
| 0        | 0.002002 | 4.18E-04 | 0.004476 | 0        | 6.50E-05 | 0.004112 | 9.08E-04 | 0        | 2.86E-04 | 0.001094 | 7.79E-04 | 0        | 0.001505 | 0        |
| 0        | 0.001261 | 9.37E-04 | 0.002629 | 3.75E-04 | 1.03E-04 | 0.002477 | 2.19E-04 | 0        | 5.22E-04 | 0.00355  | 0.001589 | 0.001393 | 0.00253  | 0        |
| 0.007288 | 0.002321 | 0.005538 | 5.45E-04 | 0.006864 | 0.007051 | 0.001918 | 0.003595 | 0.010092 | 7.87E-04 | 0.002777 | 0.029675 | 0.002026 | 0.001707 | 0.006947 |
| 0.001978 | 0.005595 | 0.001563 | 0.001144 | 0.001367 | 0.001268 | 3.62E-04 | 0.005014 | 0.003217 | 1.93E-04 | 6.03E-04 | 3.85E-04 | 2.01E-04 | 1.29E-04 | 0.002815 |
| 2.06E-04 | 6.11E-04 | 4.10E-05 | 0        | 7.41E-04 | 0        | 0        | 0        | 1.90E-05 | 0        | 7.60E-05 | 0        | 0        | 0.004323 | 0.002793 |
| 0.008749 | 0.002355 | 0.003204 | 1.20E-04 | 4.69E-04 | 4.34E-04 | 6.20E-04 | 1.54E-04 | 4.67E-04 | 7.70E-04 | 0        | 4.60E-05 | 2.14E-04 | 6.60E-04 | 0.039587 |
| 2.20E-04 | 0.001638 | 0        | 2.31E-04 | 0.005479 | 2.94E-04 | 8.59E-04 | 0.006664 | 1.14E-04 | 0.014852 | 0        | 5.50E-05 | 0.006317 | 0.001986 | 0.003105 |
| 4.10E-05 | 4.21E-04 | 0.001223 | 8.74E-04 | 0.001275 | 0.002688 | 0.017566 | 3.83E-04 | 0.002043 | 6.55E-04 | 0.001853 | 0.00185  | 0.001263 | 0.007101 | 2.31E-04 |
| 0.002138 | 6.09E-04 | 7.70E-05 | 2.92E-04 | 0.003848 | 9.57E-04 | 0.005112 | 9.22E-04 | 0.004235 | 2.03E-04 | 1.27E-04 | 0.001828 | 0.009709 | 0.003957 | 0.002506 |
| 0.002194 | 1.86E-04 | 0        | 0        | 0.021396 | 1.13E-04 | 0.012085 | 0        | 2.50E-05 | 5.50E-04 | 0        | 0.005638 | 0.016564 | 0        | 0        |
| 0.001304 | 0.001253 | 4.00E-05 | 0        | 0.009052 | 0.002183 | 1.30E-04 | 0.005543 | 0.013656 | 0.005781 | 0        | 1.72E-04 | 4.99E-04 | 2.20E-05 | 4.80E-05 |
| 0.019891 | 3.20E-05 | 1.73E-04 | 0        | 6.00E-05 | 0        | 4.83E-04 | 0        | 0.016495 | 1.72E-04 | 3.18E-04 | 1.88E-04 | 0.002466 | 0.004336 | 0.023093 |
| 1.10E-05 | 9.10E-05 | 0        | 0        | 4.40E-05 | 0        | 0        | 0        | 0        | 5.90E-05 | 5.90E-05 | 3.10E-05 | 6.80E-04 | 0        | 5.40E-05 |
| 2.42E-04 | 5.79E-04 | 7.60E-05 | 1.95E-04 | 0.00162  | 6.90E-05 | 3.62E-04 | 3.51E-04 | 0        | 4.80E-04 | 1.30E-04 | 1.57E-04 | 1.52E-04 | 1.11E-04 | 8.06E-04 |
| 1.70E-05 | 4.95E-04 | 0        | 0        | 1.44E-04 | 2.80E-05 | 0.060682 | 0        | 6.00E-05 | 0        | 0        | 0        | 0.001317 | 3.00E-05 | 0.001255 |
| 5.80E-04 | 0.004921 | 1.02E-04 | 3.18E-04 | 0.00259  | 3.50E-05 | 4.94E-04 | 3.09E-04 | 7.24E-04 | 0        | 0.001343 | 0        | 3.90E-05 | 0.001212 | 2.30E-05 |
| 0        | 2.64E-04 | 3.60E-05 | 8.20E-04 | 4.58E-04 | 3.12E-04 | 0.002619 | 5.24E-04 | 5.20E-05 | 2.60E-04 | 0        | 0.002669 | 3.38E-04 | 3.34E-04 | 0        |
| 0        | 3.02E-04 | 3.35E-04 | 6.15E-04 | 3.88E-04 | 3.15E-04 | 0.01168  | 2.47E-04 | 2.94E-04 | 1.64E-04 | 2.81E-04 | 4.38E-04 | 2.05E-04 | 0.003249 | 1.40E-05 |
| 6.00E-06 | 0.005419 | 0        | 6.70E-05 | 1.52E-04 | 0        | 0        | 0        | 4.20E-04 | 0        | 2.33E-04 | 0        | 0        | 3.00E-04 | 0        |
| 0        | 0.003034 | 0        | 0        | 0.001525 | 0        | 0        | 0        | 0        | 0        | 1.28E-04 | 0        | 0        | 1.22E-04 | 0        |
| 0        | 7.70E-05 | 0        | 1.30E-04 | 9.70E-05 | 3.70E-05 | 0        | 0        | 0        | 0        | 0        | 0        | 0        | 0        | 0        |
| 0        | 3.40E-05 | 9.00E-05 | 0        | 1.66E-04 | 0        | 0        | 0        | 0        | 0        | 0        | 0        | 0        | 2.86E-04 | 1.50E-05 |
| 8.60E-05 | 0        | 0        | 0        | 0        | 0        | 0        | 0        | 0        | 1.24E-04 | 0        | 0        | 0        | 0        | 2.19E-04 |
| 7.20E-05 | 7.44E-04 | 8.70E-05 | 1.33E-04 | 1.37E-04 | 6.60E-05 | 0        | 7.00E-05 | 0        | 0.001454 | 0        | 0        | 3.35E-04 | 0        | 1.64E-04 |
| 1.70E-05 | 9.00E-05 | 4.00E-05 | 2.38E-04 | 0        | 1.05E-04 | 0        | 7.60E-05 | 4.40E-05 | 4.60E-05 | 6.20E-05 | 0        | 0        | 1.40E-05 | 1.80E-05 |
| 4.00E-06 | 0        | 0        | 0        | 0        | 0        | 0        | 0        | 9.60E-05 | 0        | 0        | 0        | 0        | 1.32E-04 | 8.70E-05 |
| 0        | 0        | 0        | 0        | 0        | 0        | 0        | 0        | 0        | 0        | 0        | 0        | 0        | 0        | 0        |
| 0.016481 | 0.039377 | 0.004763 | 0.003329 | 0.003534 | 0.004054 | 0.01576  | 0.005363 | 0.008388 | 0.004397 | 0.009911 | 0.003385 | 0.00403  | 0.011842 | 0.026253 |

| CP25     | CP14     | CP31     | CP55     | CP22     | CP46     | CP64     | CP18     | CP47     | CP45     | CP33     | CP17     | CP15     | CP08     | CP28     |
|----------|----------|----------|----------|----------|----------|----------|----------|----------|----------|----------|----------|----------|----------|----------|
| 0.087394 | 0.083892 | 0.080043 | 0.07474  | 0.072419 | 0.060846 | 0.058892 | 0.049835 | 0.031925 | 0.025628 | 0.025355 | 0.023559 | 0.01965  | 0.018616 | 0.015446 |
| 0.554053 | 0.199218 | 0.300648 | 0.330386 | 0.02656  | 0.03268  | 0.305265 | 0.006896 | 0.05604  | 0.376425 | 0.235702 | 0.104195 | 0.331075 | 0.003472 | 0.306465 |
| 0.103451 | 0.093262 | 0.17079  | 0.154738 | 0.095995 | 0.095922 | 0.062511 | 0.050479 | 0.035847 | 0.095437 | 0.208099 | 0.037611 | 0.273999 | 0.00116  | 0.105923 |
| 0.007513 | 0.036282 | 0.31451  | 0.031641 | 0.011939 | 0.628378 | 0.024062 | 0.007072 | 0.637236 | 0.212246 | 0.006859 | 0.629861 | 0.076548 | 0.290638 | 0.509286 |
| 0.050635 | 0.081636 | 0.031474 | 0.16222  | 0.129963 | 0.011558 | 0.033655 | 0.314498 | 0.003689 | 0.091694 | 0.006467 | 0.011598 | 0.002948 | 0.102686 | 7.07E-04 |
| 0.002123 | 0.183858 | 0.002201 | 0.02769  | 0.068769 | 0.003914 | 0.081731 | 0.00721  | 0.117129 | 0.017146 | 4.41E-04 | 0.05117  | 0.075938 | 4.81E-04 | 0.004671 |
| 0.089495 | 0.087945 | 0.024201 | 0.056971 | 0.05885  | 0.099364 | 0.01449  | 0.041299 | 0.004291 | 0.003915 | 0.392843 | 0.046084 | 0.024952 | 0.283938 | 0.021119 |
| 0.020548 | 0.006199 | 0.002956 | 0.007273 | 0.126323 | 0.011159 | 0.051848 | 0.237526 | 8.10E-05 | 0.001059 | 0.046791 | 0.017735 | 7.83E-04 | 0.234457 | 2.35E-04 |
| 0.00165  | 0.012903 | 9.75E-04 | 0.019632 | 0.137423 | 6.20E-05 | 0.046678 | 0.045022 | 4.01E-04 | 0.003707 | 0.005848 | 0.005567 | 6.75E-04 | 8.40E-05 | 8.60E-05 |
| 9.35E-04 | 0.001263 | 7.08E-04 | 0.012484 | 0.009438 | 0.011908 | 0.006546 | 0.007088 | 0.003215 | 0.001138 | 0.003247 | 5.12E-04 | 0.001051 | 0.03803  | 3.11E-04 |
| 0.024143 | 0.00954  | 0.012402 | 0.020026 | 0.026235 | 0.005695 | 0.001977 | 0.017955 | 0.004904 | 0.006486 | 0.010763 | 0.010051 | 0.017836 | 0.002489 | 0.003431 |
| 0.005044 | 0.022671 | 0.010299 | 0.019788 | 0.018549 | 0.004995 | 0.021051 | 0.002881 | 0.072451 | 0.044917 | 0.002972 | 0.009035 | 0.05232  | 2.18E-04 | 7.07E-04 |
| 7.12E-04 | 0.006641 | 0.001274 | 0.001638 | 0.034548 | 0.007122 | 0.012922 | 0.04112  | 2.53E-04 | 0.003148 | 5.64E-04 | 0.00332  | 6.50E-04 | 1.15E-04 | 2.57E-04 |
| 0        | 0.045609 | 2.20E-04 | 5.34E-04 | 0.005133 | 0        | 0.032868 | 4.51E-04 | 0.001678 | 1.04E-04 | 4.90E-05 | 1.94E-04 | 2.82E-04 | 1.17E-04 | 1.45E-04 |
| 0.005703 | 0.024058 | 7.10E-05 | 0.003846 | 0.006963 | 8.07E-04 | 0.143454 | 0.005509 | 7.09E-04 | 0.002671 | 5.09E-04 | 0.002347 | 0.002    | 8.20E-05 | 6.00E-04 |
| 0.013088 | 0.008324 | 0.00112  | 0.002591 | 0.01633  | 0.00262  | 7.62E-04 | 0.010636 | 0        | 1.80E-05 | 0.038176 | 0.007127 | 1.29E-04 | 0.018923 | 4.86E-04 |
| 0        | 0.001173 | 4.24E-04 | 0.001948 | 0.018716 | 2.15E-04 | 0.026934 | 0.012892 | 7.33E-04 | 0.018376 | 1.32E-04 | 0.003075 | 0.002505 | 9.30E-05 | 2.39E-04 |
| 0.00415  | 0.015009 | 0.002565 | 0.00302  | 0.010182 | 5.98E-04 | 0.010018 | 0.003837 | 0.001606 | 0.005595 | 3.06E-04 | 0.00314  | 0.005696 | 9.70E-05 | 7.04E-04 |
| 0.00465  | 0.001307 | 0.002417 | 0.005771 | 0.01071  | 0.002215 | 0.001607 | 0.012955 | 0.015517 | 0.009493 | 9.90E-05 | 0.003948 | 0.036908 | 1.39E-04 | 0.001828 |
| 0.001147 | 0.003795 | 3.61E-04 | 8.54E-04 | 0.027719 | 0.002654 | 0.003714 | 0.033238 | 3.17E-04 | 0.002858 | 2.22E-04 | 0.00201  | 0.001887 | 1.60E-05 | 1.46E-04 |
| 0.003793 | 0.003056 | 0.0067   | 0.011089 | 7.40E-05 | 0.003308 | 0.002349 | 0        | 8.70E-05 | 9.90E-05 | 0.004527 | 8.55E-04 | 0.007097 | 9.60E-05 | 0.01791  |
| 0.004279 | 0.001061 | 0.002276 | 0.002547 | 0.005164 | 3.62E-04 | 0.004573 | 0.006181 | 0.002273 | 0.008256 | 4.63E-04 | 0.004353 | 0.004688 | 1.90E-05 | 0.001762 |
| 0.005041 | 0.00118  | 0.005495 | 0.007767 | 0.008677 | 0.001777 | 4.51E-04 | 0.004346 | 0.002268 | 0.008739 | 0.001302 | 0.002016 | 0.00967  | 2.10E-05 | 0.001478 |
| 8.20E-05 | 3.50E-05 | 9.50E-04 | 0.0015   | 0.001052 | 1.56E-04 | 0        | 3.01E-04 | 3.70E-04 | 9.40E-05 | 2.35E-04 | 0        | 1.39E-04 | 1.32E-04 | 0        |
| 8.49E-04 | 1.18E-04 | 2.08E-04 | 0.001724 | 0.001621 | 0.002013 | 4.13E-04 | 7.66E-04 | 3.05E-04 | 2.83E-04 | 6.59E-04 | 3.33E-04 | 1.39E-04 | 2.36E-04 | 0        |
| 0.001025 | 0.023438 | 8.90E-04 | 0.009936 | 0.002313 | 0.00135  | 0.012739 | 0.002359 | 3.84E-04 | 0.005286 | 0.001606 | 0.001393 | 0.009888 | 8.50E-05 | 4.00E-04 |
| 0.001328 | 0.002469 | 2.26E-04 | 0.008815 | 3.15E-04 | 6.60E-05 | 0.010777 | 5.50E-05 | 5.20E-05 | 0.002967 | 9.30E-05 | 7.50E-04 | 0.002625 | 1.59E-04 | 0.002214 |
| 0        | 2.13E-04 | 0        | 6.60E-05 | 1.75E-04 | 0        | 1.63E-04 | 0.001712 | 3.70E-05 | 0        | 0        | 5.80E-05 | 0        | 9.47E-04 | 0        |
| 1.61E-04 | 0.001169 | 7.78E-04 | 0        | 0        | 5.42E-04 | 0.003221 | 2.10E-04 | 8.96E-04 | 2.70E-05 | 4.80E-05 | 1.19E-04 | 5.55E-04 | 1.29E-04 | 3.87E-04 |
| 3.09E-04 | 1.48E-04 | 0.010165 | 0        | 3.30E-04 | 3.22E-04 | 0.001686 | 9.42E-04 | 2.60E-04 | 0.022963 | 0.002101 | 0.001811 | 0.001578 | 3.60E-05 | 2.34E-04 |
| 4.01E-04 | 8.48E-04 | 6.86E-04 | 0.005668 | 0.014511 | 5.29E-04 | 9.31E-04 | 0.017111 | 9.00E-05 | 0.001131 | 9.60E-05 | 7.62E-04 | 1.38E-04 | 0        | 0        |
| 0.003066 | 1.49E-04 | 4.28E-04 | 0.001192 | 6.44E-04 | 0.00109  | 0.010526 | 6.64E-04 | 3.21E-04 | 5.68E-04 | 0.001517 | 2.90E-04 | 0.001158 | 3.60E-05 | 4.90E-04 |
| 0        | 3.70E-05 | 0.002993 | 1.43E-04 | 1.50E-04 | 3.40E-05 | 0.003425 | 0        | 9.43E-04 | 0.013243 | 0        | 0.001093 | 0.001986 | 0        | 0        |
| 1.70E-04 | 0.009856 | 6.50E-04 | 0.003235 | 7.38E-04 | 4.40E-04 | 4.75E-04 | 5.35E-04 | 0        | 4.90E-05 | 5.10E-05 | 0.003347 | 0.001704 | 2.30E-05 | 0        |
| 0        | 0        | 0        | 6.30E-05 | 7.70E-05 | 2.39E-04 | 0        | 2.82E-04 | 3.04E-04 | 1.94E-04 | 0        | 6.50E-05 | 0        | 7.32E-04 | 0        |
| 0        | 6.80E-05 | 0        | 6.90E-05 | 8.30E-05 | 0        | 0        | 5.70E-05 | 3.30E-05 | 9.19E-04 | 0        | 0        | 0.001484 | 0        | 0        |
| 2.30E-04 | 9.20E-05 | 0.001964 | 2.85E-04 | 8.10E-05 | 3.40E-05 | 6.30E-05 | 1.73E-04 | 2.25E-04 | 7.10E-05 | 8.30E-05 | 1.25E-04 | 1.25E-04 | 3.40E-05 | 0        |
| 4.99E-04 | 0.012358 | 0        | 4.88E-04 | 7.80E-05 | 0        | 1.03E-04 | 0.025664 | 0        | 0        | 0        | 0        | 0        | 9.30E-05 | 0        |
| 0        | 0.001799 | 0.001666 | 0.001371 | 0        | 0        | 1.57E-04 | 0        | 0        | 0        | 0        | 0.00326  | 1.29E-04 | 1.90E-05 | 0        |
| 7.12E-04 | 1.20E-04 | 1.71E-04 | 2.72E-04 | 0.006377 | 4.85E-04 | 1.31E-04 | 0.004154 | 9.10E-05 | 0.001178 | 2.09E-04 | 4.83E-04 | 5.11E-04 | 0        | 7.70E-05 |
| 5.56E-04 | 2.59E-04 | 1.40E-04 | 3.48E-04 | 0.00374  | 1.20E-04 | 2.70E-05 | 0.005384 | 0        | 4.70E-04 | 0        | 5.29E-04 | 0        | 0        | 0        |
| 0        | 5.33E-04 | 0        | 7.45E-04 | 0.010976 | 0        | 7.40E-05 | 0.002712 | 4.30E-05 | 0.001467 | 0        | 2.00E-04 | 0        | 0        | 0        |
| 0        | 0.006124 | 7.40E-05 | 2.99E-04 | 0.010577 | 0        | 3.30E-05 | 4.58E-04 | 0        | 0        | 0        | 2.78E-04 | 0.02307  | 0        | 0        |
| 0        | 0        | 0        | 5.80E-05 | 6.70E-05 | 0        | 0        | 5.30E-05 | 0        | 0        | 0        | 0        | 0        | 0        | 7.00E-05 |
| 0        | 0        | 0        | 7.40E-05 | 0.0011   | 2.60E-05 | 0.001066 | 6.00E-04 | 0        | 0        | 4.60E-05 | 6.60E-05 | 0        | 0        | 0        |
| 0        | 0        | 0        | 2.13E-04 | 0        | 0        | 3.60E-05 | 0        | 0        | 0        | 0        | 0        | 0        | 0        | 0        |
| 0        | 7.12E-04 | 6.00E-05 | 3.41E-04 | 4.04E-04 | 8.80E-05 | 0        | 0.00139  | 0        | 0        | 0        | 1.30E-04 | 0.001351 | 0        | 2.44E-04 |
| 0        | 4.30E-05 | 0        | 7.20E-05 | 3.33E-04 | 0        | 0        | 1.15E-04 | 9.40E-05 | 0.001054 | 0        | 2.67E-04 | 5.15E-04 | 0        | 8.40E-05 |
| 0        | 0        | 0        | 0        | 0        | 0        | 0        | 1.77E-04 | 0        | 0        | 0        | 0        | 0        | 0        | 0        |
| 0        | 0        | 0        | 0        | 0        | 0        | 0        | 0        | 0        | 0        | 0        | 0        | 0        | 0        | 0        |
| 0.001065 | 0.00953  | 0.003821 | 0.003829 | 0.017579 | 0.004307 | 0.005596 | 0.0152   | 0.002902 | 0.008881 | 0.00152  | 0.005278 | 0.003618 | 0.001352 | 0.001858 |

| CP24     | CP20     | CP52     | CP71     | CP07     | CP13     | CP43     | CP36     | CP02     | CP60     | CP03     | CP39     | CP69     | CP49     | CP04     |
|----------|----------|----------|----------|----------|----------|----------|----------|----------|----------|----------|----------|----------|----------|----------|
| 0.013917 | 0.011514 | 0.005611 | 0.005594 | 0.005204 | 0.002637 | 0.002402 | 0.001966 | 0.001678 | 0.001362 | 0.001283 | 0.001222 | 0.001085 | 8.47E-04 | 8.45E-04 |
| 0.012118 | 0.308872 | 0.095134 | 0.550539 | 0.018457 | 0.03881  | 0.351445 | 0.227006 | 0.62592  | 0.50513  | 0.243171 | 0.0725   | 0.662513 | 0.553898 | 0.88895  |
| 0.023142 | 0.118958 | 0.103321 | 0.258732 | 0.322818 | 0.087621 | 0.259446 | 0.280929 | 0.111726 | 0.37555  | 0.309301 | 0.155934 | 0.207627 | 0.163875 | 0.001405 |
| 0.006094 | 0.364547 | 0.490105 | 0.012615 | 0.120369 | 0.007062 | 0.132994 | 0.08979  | 0.00567  | 4.11E-04 | 0.098351 | 0.233643 | 0.015408 | 0.028993 | 0.085761 |
| 0.336131 | 0.068553 | 0.11187  | 0.012025 | 0.104958 | 0.294362 | 0.010416 | 0.028919 | 0.004072 | 0.04522  | 0.075433 | 0.068766 | 0.002164 | 0.015802 | 4.84E-04 |
| 0.007778 | 0.010153 | 0.028768 | 0.005332 | 0.234082 | 0.006804 | 1.25E-04 | 0.006187 | 0.001939 | 2.43E-04 | 6.29E-04 | 0.0033   | 0.00526  | 1.91E-04 | 3.17E-04 |
| 0.085208 | 0.004143 | 5.51E-04 | 0.076405 | 0.072224 | 0.143136 | 0.150321 | 0.255541 | 0.016839 | 0.006402 | 0.05282  | 0.301763 | 0.042683 | 0.087478 | 2.00E-04 |
| 0.256096 | 0.002662 | 0.028609 | 0.01328  | 0.008187 | 0.294794 | 0.011672 | 9.70E-04 | 0.087741 | 0.015084 | 0.015491 | 0.007474 | 0.001097 | 0.009985 | 0        |
| 0.069572 | 0.001659 | 0.00437  | 4.69E-04 | 4.46E-04 | 5.90E-05 | 3.70E-04 | 2.84E-04 | 4.08E-04 | 0        | 4.66E-04 | 3.12E-04 | 1.90E-04 | 0.004711 | 1.92E-04 |
| 0.01244  | 8.33E-04 | 0.001133 | 1.75E-04 | 5.91E-04 | 0.0013   | 1.38E-04 | 0.001067 | 0        | 1.80E-04 | 3.34E-04 | 0.001159 | 1.85E-04 | 0.007386 | 1.09E-04 |
| 0.012037 | 0.001893 | 4.53E-04 | 0.00203  | 0.025898 | 0.026285 | 0.009078 | 0.007661 | 0.00545  | 0.005325 | 0.00228  | 0.020399 | 0.002995 | 0.001366 | 1.18E-04 |
| 0.002201 | 0.031647 | 0.023407 | 6.87E-04 | 0.010252 | 0.002429 | 0.006353 | 0.00758  | 0.090186 | 3.25E-04 | 0.010294 | 0.013817 | 0        | 0.025092 | 5.00E-05 |
| 0.055787 | 9.07E-04 | 0.026707 | 0.001141 | 0.008401 | 5.12E-04 | 0.003384 | 0.002368 | 0.003383 | 0.001221 | 0.051848 | 0.004684 | 0        | 8.73E-04 | 0        |
| 7.64E-04 | 3.41E-04 | 1.21E-04 | 6.53E-04 | 1.51E-04 | 1.43E-04 | 0        | 8.70E-05 | 0        | 4.83E-04 | 9.37E-04 | 3.26E-04 | 0.001174 | 0.004974 | 0        |
| 0.015236 | 0.010057 | 0.026032 | 0.005279 | 0        | 0.001444 | 0.001702 | 0.001348 | 7.80E-05 | 0        | 0.011442 | 0.002296 | 2.93E-04 | 0.01742  | 0        |
| 0.014223 | 6.30E-05 | 2.70E-05 | 0.002339 | 0.004942 | 0.065186 | 0.010501 | 0.001021 | 0.010074 | 0.001608 | 0.001488 | 0.009451 | 0.001493 | 0.001416 | 0        |
| 0.002976 | 3.92E-04 | 0.002557 | 0.014398 | 0.00175  | 0.001001 | 0        | 0.005359 | 0.001341 | 6.80E-05 | 6.82E-04 | 8.40E-05 | 0.001728 | 0.002306 | 0.02012  |
| 0.003461 | 0.005865 | 0.005117 | 9.42E-04 | 2.86E-04 | 0.002286 | 5.09E-04 | 0.013256 | 0.006073 | 6.00E-05 | 0.026175 | 0.01313  | 2.00E-04 | 3.00E-04 | 1.47E-04 |
| 0.001153 | 0.00423  | 0.007206 | 0.004157 | 0.006117 | 0.004821 | 0        | 0.003051 | 0        | 0        | 0.021599 | 0.005444 | 0        | 1.08E-04 | 4.90E-05 |
| 0.024086 | 0.001304 | 0.00264  | 4.30E-05 | 6.00E-04 | 0.008619 | 2.63E-04 | 0.003744 | 0        | 3.19E-04 | 0.003668 | 0.003268 | 2.76E-04 | 8.91E-04 | 1.42E-04 |
| 9.90E-05 | 0.001849 | 0.01697  | 0.01097  | 0.005257 | 0        | 0.027286 | 0.010892 | 0.004055 | 0.015221 | 0.019714 | 0.030737 | 0.03246  | 0.028601 | 4.90E-05 |
| 9.65E-04 | 0.001251 | 0.001157 | 0.003474 | 0.003191 | 7.10E-05 | 3.94E-04 | 0.00628  | 0.003893 | 0.00125  | 5.80E-05 | 0.001455 | 0.011357 | 0.004097 | 0        |
| 0.002055 | 0.001048 | 2.50E-04 | 0.001068 | 0.025831 | 0.002305 | 0.008004 | 0.003731 | 0.012115 | 0.012861 | 0.007613 | 0.004752 | 0.001186 | 5.81E-04 | 4.40E-05 |
| 1.20E-04 | 0        | 0        | 0        | 0        | 0        | 0        | 0        | 0        | 0        | 0        | 8.30E-05 | 0        | 0        | 0        |
| 6.16E-04 | 4.10E-05 | 0        | 1.70E-05 | 0        | 6.00E-05 | 0        | 1.49E-04 | 0        | 0        | 4.30E-05 | 8.60E-05 | 0        | 2.40E-05 | 0        |
| 0.002558 | 0.001795 | 0.003074 | 0.003535 | 1.61E-04 | 9.35E-04 | 1.37E-04 | 0.005121 | 3.01E-04 | 6.70E-05 | 0.001051 | 0.006091 | 0.001138 | 0.001371 | 5.20E-05 |
| 9.48E-04 | 0.005043 | 1.80E-04 | 0.001799 | 1.43E-04 | 2.45E-04 | 0.001028 | 1.99E-04 | 0.001888 | 1.18E-04 | 0.007771 | 4.85E-04 | 8.34E-04 | 0.013371 | 5.80E-05 |
| 5.58E-04 | 9.70E-05 | 3.50E-05 | 0        | 1.46E-04 | 0        | 0        | 9.53E-04 | 0        | 0        | 0        | 0        | 0        | 9.60E-05 | 0        |
| 1.40E-04 | 0.007422 | 2.90E-05 | 5.99E-04 | 2.96E-04 | 3.18E-04 | 0        | 7.77E-04 | 1.46E-04 | 3.94E-04 | 0.00268  | 2.48E-04 | 9.40E-05 | 0.002083 | 5.20E-05 |
| 2.80E-04 | 0.007029 | 2.63E-04 | 1.74E-04 | 0        | 5.66E-04 | 0.006863 | 0.013048 | 6.83E-04 | 0.002243 | 0.001156 | 0.014078 | 0.001237 | 4.90E-05 | 0        |
| 0.01464  | 1.24E-04 | 4.52E-04 | 4.90E-05 | 0.005597 | 6.00E-05 | 5.46E-04 | 6.89E-04 | 9.34E-04 | 8.79E-04 | 0.003543 | 0.002285 | 0        | 3.70E-05 | 0        |
| 7.11E-04 | 4.80E-05 | 1.94E-04 | 0.003544 | 0.001354 | 5.64E-04 | 4.98E-04 | 0.007067 | 0.001108 | 0.003791 | 0.014933 | 0.004432 | 0.001719 | 0.009158 | 6.37E-04 |
| 1.76E-04 | 0.007067 | 0.002414 | 2.00E-05 | 1.51E-04 | 4.23E-04 | 0        | 0.001141 | 0        | 0        | 0        | 0.004066 | 0        | 1.03E-04 | 5.60E-05 |
| 5.02E-04 | 0.00848  | 0.002402 | 0        | 2.91E-04 | 5.80E-05 | 0        | 0.00123  | 7.10E-05 | 0        | 6.55E-04 | 0.002918 | 0        | 2.56E-04 | 0        |
| 0.001424 | 0        | 0        | 2.93E-04 | 0        | 5.10E-05 | 0        | 2.74E-04 | 0        | 6.60E-05 | 0.002607 | 0        | 0        | 0.001683 | 0        |
| 7.40E-05 | 2.04E-04 | 3.43E-04 | 0        | 0        | 2.60E-04 | 0        | 8.05E-04 | 0        | 0        | 0.002471 | 1.33E-04 | 0        | 0        | 0        |
| 2.50E-05 | 0        | 1.66E-04 | 0        | 0        | 0        | 0        | 0        | 0        | 0        | 1.00E-05 | 0        | 0        | 0        | 0        |
| 8.24E-04 | 0.001596 | 0        | 0.00324  | 0        | 0        | 0        | 0        | 0        | 0        | 0        | 0        | 0        | 0        | 0        |
| 2.56E-04 | 8.18E-04 | 0        | 0.001195 | 0.001497 | 0        | 1.32E-04 | 0        | 0        | 0        | 1.60E-05 | 0        | 0.001286 | 0.002339 | 1.12E-04 |
| 0.001328 | 1.89E-04 | 0        | 1.90E-05 | 0.001024 | 0.002571 | 3.73E-04 | 0.001066 | 3.84E-04 | 5.60E-04 | 9.42E-04 | 0.001404 | 0        | 6.80E-05 | 0        |
| 0.005091 | 0        | 1.42E-04 | 2.60E-05 | 0.002669 | 1.27E-04 | 3.89E-04 | 1.03E-04 | 0        | 0.001299 | 0.00135  | 9.44E-04 | 0        | 0        | 0        |
| 0.001027 | 8.90E-05 | 3.25E-04 | 8.03E-04 | 1.60E-04 | 0        | 0        | 1.51E-04 | 0        | 0        | 0        | 0        | 0        | 2.60E-05 | 0        |
| 2.80E-05 | 1.79E-04 | 0        | 0        | 0        | 0        | 0        | 0        | 0        | 0        | 1.70E-05 | 0        | 1.02E-04 | 0.001607 | 0        |
| 0        | 0        | 0        | 0        | 0        | 0        | 0        | 0        | 0        | 0        | 1.60E-05 | 0        | 0        | 0        | 0        |
| 2.32E-04 | 0        | 0        | 0        | 0        | 0        | 0        | 0        | 0        | 0        | 0        | 0        | 0        | 2.90E-04 | 0        |
| 0        | 0        | 0        | 0        | 0        | 0        | 0        | 0        | 0        | 0        | 3.90E-05 | 0        | 0        | 0        | 0        |
| 1.25E-04 | 4.07E-04 | 0        | 2.30E-05 | 0        | 3.29E-04 | 0.001824 | 6.44E-04 | 0        | 5.80E-05 | 3.62E-04 | 8.24E-04 | 0        | 1.15E-04 | 0        |
| 2.90E-05 | 5.10E-05 | 0        | 1.37E-04 | 4.56E-04 | 0        | 0        | 9.40E-05 | 0        | 0        | 0        | 0        | 0.001282 | 2.50E-05 | 0        |
| 0        | 0        | 0        | 0        | 0        | 0        | 0        | 0        | 0        | 1.05E-04 | 9.90E-05 | 0        | 0        | 8.80E-05 | 0        |
| 0        | 3.70E-05 | 0        | 0        | 0        | 0        | 0        | 0        | 0        | 0        | 0        | 0        | 0        | 0        | 0        |
| 0.010749 | 0.006543 | 0.007865 | 0.00218  | 0.006043 | 0.001746 | 0.001407 | 0.007452 | 0.001844 | 0.002097 | 0.005162 | 0.006007 | 9.34E-04 | 0.00602  | 5.10E-05 |

| CP66     | CP35     | CP38     | CP70     | CP50     | CP34     | CP01     | CP29     | CP23     | CP68     | CP40     | CP37     | CP41     | CP72     | CPR22    |
|----------|----------|----------|----------|----------|----------|----------|----------|----------|----------|----------|----------|----------|----------|----------|
| 7.54E-04 | 7.37E-04 | 6.50E-04 | 6.39E-04 | 6.28E-04 | 5.27E-04 | 5.21E-04 | 3.11E-04 | 2.94E-04 | 2.65E-04 | 2.54E-04 | 1.73E-04 | 8.70E-05 | 6.20E-05 | 0.622356 |
| 0.820512 | 0.096209 | 0.013622 | 0.656041 | 0.310502 | 0.893372 | 0.023122 | 0.047694 | 6.58E-04 | 0.080826 | 0.349048 | 0.084358 | 0.964604 | 0.050016 | 0.044236 |
| 0.028469 | 0.551578 | 0.139722 | 0.033693 | 0.257529 | 0.010803 | 0.019152 | 0.514387 | 3.05E-04 | 0.133925 | 0.192567 | 0.154258 | 0.018557 | 0.114113 | 0.039328 |
| 8.50E-04 | 2.03E-04 | 0        | 0.197609 | 0.002879 | 2.86E-04 | 0.008295 | 0.003158 | 0.006097 | 0.001281 | 0.019967 | 0.002157 | 0.001402 | 0.013102 | 0.017727 |
| 0.009307 | 0.007825 | 0.025483 | 0.010781 | 0.021148 | 0.001059 | 0.13317  | 0.018225 | 0.935253 | 0.263218 | 0.159482 | 0.400697 | 6.12E-04 | 0.425692 | 0.018973 |
| 2.94E-04 | 3.67E-04 | 7.60E-05 | 0.001037 | 4.80E-05 | 0        | 6.30E-05 | 0        | 9.87E-04 | 3.34E-04 | 1.89E-04 | 0        | 0        | 0.022744 | 0.09877  |
| 0.082821 | 0.047085 | 0.145912 | 8.53E-04 | 0.273924 | 0.080275 | 0.093903 | 6.10E-05 | 2.21E-04 | 0.045249 | 0.1414   | 0.001277 | 0.007883 | 0.019811 | 0.006146 |
| 0.004066 | 0.016438 | 0.401095 | 0.001197 | 0.024676 | 5.64E-04 | 0.617275 | 0.012865 | 3.63E-04 | 0.295893 | 0.042953 | 0.169617 | 7.70E-05 | 0.093606 | 0.01332  |
| 6.87E-04 | 0.174174 | 0.085033 | 5.09E-04 | 0        | 2.90E-05 | 9.74E-04 | 0.375376 | 4.53E-04 | 0.004315 | 1.73E-04 | 0        | 2.34E-04 | 0.001229 | 0.010424 |
| 2.24E-04 | 2.49E-04 | 0        | 1.40E-05 | 3.00E-05 | 5.80E-05 | 5.72E-04 | 0.002127 | 1.43E-04 | 0.002239 | 1.22E-04 | 0.031102 | 0        | 0.002891 | 0.020918 |
| 0.002534 | 9.28E-04 | 0.019922 | 9.90E-05 | 0.003405 | 6.56E-04 | 0.011658 | 0.004454 | 7.50E-05 | 0.001746 | 0.008688 | 0.008526 | 4.64E-04 | 0.004032 | 0.002807 |
| 0.001002 | 7.40E-05 | 1.34E-04 | 7.47E-04 | 3.70E-05 | 2.50E-04 | 9.54E-04 | 0.001702 | 2.76E-04 | 7.00E-05 | 0.003176 | 0.001901 | 4.98E-04 | 0.006177 | 0.007454 |
| 8.84E-04 | 1.85E-04 | 0.074742 | 3.00E-05 | 0.055166 | 2.35E-04 | 0.006699 | 3.81E-04 | 0.009838 | 0.009382 | 0.004522 | 0.013245 | 7.40E-05 | 0.042899 | 0.014056 |
| 9.28E-04 | 5.60E-05 | 8.30E-05 | 6.31E-04 | 0        | 2.50E-05 | 0.001235 | 0        | 8.70E-05 | 0.081868 | 1.34E-04 | 0        | 0        | 9.80E-05 | 0.002723 |
| 0.005953 | 1.03E-04 | 0        | 1.36E-04 | 0        | 2.50E-04 | 3.60E-05 | 0        | 6.40E-05 | 0.012446 | 5.40E-05 | 0        | 0        | 0.018968 | 8.10E-04 |
| 0.00307  | 3.06E-04 | 0.060744 | 0        | 0.004862 | 0.001345 | 0.059748 | 0        | 0        | 0.002626 | 0.012262 | 5.80E-04 | 7.50E-05 | 0.00154  | 4.20E-05 |
| 4.43E-04 | 0        | 0        | 0.043055 | 3.90E-05 | 6.80E-05 | 0.004648 | 7.00E-04 | 3.20E-05 | 0.014474 | 0.001456 | 0.013344 | 0        | 0.002645 | 0.008567 |
| 2.50E-05 | 2.30E-05 | 6.80E-05 | 7.10E-05 | 0        | 0        | 9.10E-05 | 0        | 8.20E-05 | 2.20E-04 | 0.009574 | 2.58E-04 | 0        | 0.01434  | 0.010406 |
| 0.001207 | 0        | 0        | 1.55E-04 | 0        | 0        | 8.30E-05 | 1.18E-04 | 5.80E-05 | 0        | 0.003983 | 0.002677 | 0        | 0.009497 | 0.018048 |
| 0        | 1.91E-04 | 0        | 0.003482 | 0.001891 | 0        | 4.20E-05 | 0        | 0.012336 | 0.001554 | 0.015232 | 0.064202 | 0        | 0.077259 | 0.004054 |
| 0.009352 | 0.002795 | 0.002829 | 0        | 1.51E-04 | 0.003653 | 0        | 0.002244 | 0        | 2.39E-04 | 0.006045 | 6.56E-04 | 0.003207 | 0.006836 | 0        |
| 0.002667 | 2.40E-05 | 0        | 6.30E-05 | 3.70E-05 | 0.00186  | 0.001832 | 0        | 2.70E-05 | 1.99E-04 | 0.001499 | 0        | 5.86E-04 | 0.007082 | 0.013996 |
| 9.41E-04 | 0        | 0.015027 | 2.33E-04 | 0.013796 | 6.10E-05 | 0.0044   | 0.003161 | 6.50E-05 | 3.74E-04 | 0.006154 | 0.013026 | 0        | 0.002376 | 0.000649 |
| 0        | 0        | 0        | 0        | 0        | 0        | 0        | 0        | 0        | 0        | 0        | 4.30E-05 | 0        | 0        | 0.001774 |
| 0        | 0        | 7.40E-05 | 0        | 0        | 0        | 3.00E-05 | 0        | 2.70E-05 | 0        | 0        | 0        | 0        | 2.60E-05 | 0.00567  |
| 2.55E-04 | 3.90E-05 | 4.48E-04 | 1.50E-05 | 7.01E-04 | 0        | 4.78E-04 | 0.00184  | 5.90E-05 | 0.001629 | 9.44E-04 | 0.001619 | 0        | 0.017858 | 0.001762 |
| 0.005188 | 6.80E-05 | 0        | 0.014263 | 4.30E-05 | 0.001712 | 0        | 0.001029 | 2.30E-05 | 1.62E-04 | 6.40E-05 | 0        | 1.56E-04 | 0.001819 | 0.002004 |
| 0        | 5.70E-05 | 5.56E-04 | 1.71E-04 | 0.001515 | 0        | 0        | 1.07E-04 | 0        | 2.40E-05 | 6.60E-05 | 0        | 8.90E-05 | 3.10E-05 | 0.003077 |
| 5.09E-04 | 0.059205 | 0.002151 | 0.003525 | 3.88E-04 | 9.80E-05 | 1.65E-04 | 3.05E-04 | 0        | 9.35E-04 | 6.33E-04 | 0.00363  | 1.82E-04 | 8.10E-05 | 5.67E-04 |
| 6.47E-04 | 3.26E-04 | 8.21E-04 | 1.51E-04 | 0        | 3.10E-05 | 1.11E-04 | 0.005073 | 0        | 0.002546 | 0.004836 | 1.70E-04 | 4.13E-04 | 4.01E-04 | 7.63E-04 |
| 3.70E-05 | 0        | 0.004827 | 0        | 0.003655 | 2.70E-05 | 0.004597 | 1.69E-04 | 0.01823  | 6.26E-04 | 0.002725 | 0.008164 | 0        | 0.00713  | 7.00E-05 |
| 0.008529 | 0        | 0        | 0.009441 | 0.01355  | 0.001895 | 0.001782 | 1.33E-04 | 9.00E-05 | 0.001063 | 0.002578 | 2.98E-04 | 0        | 0.006931 | 3.67E-04 |
| 3.50E-05 | 0        | 0        | 3.20E-05 | 3.10E-05 | 0        | 0        | 0        | 0        | 0        | 0        | 4.90E-05 | 0        | 0        | 3.50E-05 |
| 0        | 3.10E-05 | 0        | 3.00E-05 | 1.22E-04 | 0        | 0        | 0        | 0        | 2.60E-05 | 0        | 0        | 0        | 0.002599 | 1.38E-04 |
| 1.01E-04 | 0.00696  | 7.30E-05 | 0.004991 | 0.002125 | 0        | 4.59E-04 | 0        | 1.30E-04 | 0.003195 | 2.79E-04 | 5.24E-04 | 0        | 0.002572 | 0        |
| 0        | 0        | 0        | 0        | 0        | 0        | 0        | 0        | 0        | 0        | 0.001594 | 5.82E-04 | 0        | 2.90E-05 | 1.35E-04 |
| 0        | 2.23E-04 | 0        | 0        | 0        | 0        | 0        | 0        | 4.20E-05 | 0        | 0        | 0        | 0        | 0        | 2.42E-04 |
| 0.004744 | 0        | 2.11E-04 | 0        | 0        | 6.10E-05 | 0        | 5.80E-05 | 2.80E-05 | 0        | 0        | 0        | 0        | 0        | 0        |
| 5.90E-05 | 5.50E-05 | 0        | 0.009283 | 0        | 0        | 4.00E-05 | 0        | 0        | 0.008444 | 5.80E-05 | 0        | 0        | 7.68E-04 | 0        |
| 0        | 1.50E-05 | 6.50E-05 | 2.10E-05 | 3.54E-04 | 0        | 0        | 0        | 0.003511 | 5.20E-05 | 0.00301  | 0.010095 | 0        | 0.005135 | 3.39E-04 |
| 3.40E-05 | 0        | 0.001698 | 0        | 5.24E-04 | 0        | 0.001602 | 9.00E-05 | 0.004459 | 8.40E-05 | 6.74E-04 | 0.005052 | 0        | 0.001831 | 2.46E-04 |
| 0        | 0        | 0        | 1.50E-05 | 0        | 0        | 0        | 0        | 0        | 0.00266  | 6.80E-05 | 0        | 0        | 0.001884 | 0        |
| 0        | 0        | 0        | 0        | 0        | 0        | 0        | 0        | 0        | 3.10E-05 | 2.30E-05 | 0        | 0        | 0        | 0        |
| 0        | 2.30E-05 | 0        | 0        | 0        | 0        | 0        | 0        | 0        | 0        | 0        | 0        | 0        | 0        | 0        |
| 4.10E-05 | 0        | 1.52E-04 | 0        | 2.25E-04 | 0        | 3.70E-05 | 0        | 2.00E-05 | 3.00E-05 | 0        | 0        | 0        | 0        | 0        |
| 0        | 0.028598 | 0        | 0        | 0        | 0        | 0        | 0        | 0        | 0        | 0        | 0        | 0        | 5.50E-05 | 8.60E-05 |
| 0.001544 | 2.70E-05 | 0        | 0        | 3.60E-05 | 6.30E-04 | 0        | 5.30E-05 | 0        | 0.001232 | 1.17E-04 | 4.90E-05 | 0        | 8.90E-04 | 3.70E-05 |
| 0        | 0        | 0        | 0        | 0        | 6.30E-05 | 3.40E-05 | 0        | 0        | 0        | 0        | 3.30E-05 | 0        | 5.10E-05 | 2.24E-04 |
| 0        | 0        | 0        | 0        | 0        | 0        | 0        | 0        | 0        | 0.014913 | 0        | 0        | 0        | 3.30E-05 | 0        |
| 0        | 0        | 0        | 0        | 0        | 0        | 0        | 0        | 0        | 0        | 0        | 0        | 0        | 0        | 0        |
| 0.001287 | 0.004823 | 0.003782 | 0.006987 | 0.005983 | 1.07E-04 | 0.002192 | 0.004179 | 0.005636 | 0.009613 | 0.00342  | 0.007638 | 8.00E-04 | 0.012861 | 0.006654 |

| CPR09    | CPR11    | CPR20    | CPR18    | CPR08    | CPR19    | CPR03    | CPR15    | CPR21    | CPR10    | CPR16    | CPR02    | CPR04    | CPR14    | CPR07    |
|----------|----------|----------|----------|----------|----------|----------|----------|----------|----------|----------|----------|----------|----------|----------|
| 0.552217 | 0.535411 | 0.451468 | 0.33993  | 0.318243 | 0.318031 | 0.275249 | 0.254639 | 0.248898 | 0.242124 | 0.179188 | 0.168426 | 0.133048 | 0.12162  | 0.104226 |
| 0.025167 | 0.025274 | 0.032507 | 0.054796 | 0.175981 | 0.061421 | 0.063577 | 0.076197 | 0.281651 | 0.172182 | 0.126158 | 0.137239 | 0.034205 | 0.090085 | 0.344341 |
| 0.090296 | 0.07841  | 0.051899 | 0.111487 | 0.156615 | 0.075712 | 0.05244  | 0.216779 | 0.222152 | 0.16181  | 0.126043 | 0.128175 | 0.19826  | 0.149375 | 0.18201  |
| 0.020145 | 0.016401 | 0.021027 | 0.087971 | 0.069165 | 0.08001  | 0.051382 | 0.155668 | 0.079895 | 0.042462 | 0.426488 | 0.015775 | 0.041478 | 0.169572 | 0.199851 |
| 0.045781 | 0.011135 | 0.044528 | 0.022963 | 0.015135 | 0.004727 | 0.011463 | 0.046599 | 0.018409 | 0.023861 | 0.005941 | 0.019023 | 0.058551 | 0.008393 | 0.005555 |
| 0.039946 | 0.164903 | 0.164308 | 0.212172 | 0.055519 | 0.15976  | 0.267295 | 0.074545 | 0.0536   | 0.160278 | 0.006511 | 0.314312 | 0.272926 | 0.166301 | 0.020395 |
| 7.17E-04 | 0.008476 | 0        | 3.40E-05 | 0.002622 | 5.40E-05 | 0        | 6.52E-04 | 3.75E-04 | 0.016119 | 5.73E-04 | 0.011885 | 7.88E-04 | 0.022414 | 0.001263 |
| 0.064433 | 0.049978 | 0.008245 | 6.96E-04 | 0.025178 | 0.001152 | 1.96E-04 | 0.006482 | 0.002684 | 0.019446 | 0.01208  | 0.016859 | 0.031082 | 0.010003 | 0.024274 |
| 1.81E-04 | 0.043887 | 0.074939 | 0.010381 | 4.82E-04 | 0.118887 | 0.108438 | 0.004349 | 0.008518 | 0.0034   | 0.006634 | 0.040436 | 0.029431 | 0.102211 | 0.029555 |
| 0.100448 | 0.013321 | 0.02511  | 0.028384 | 0.013186 | 0.020516 | 0.008063 | 0.020097 | 0.022346 | 0.035725 | 0.006938 | 0.001069 | 0.020275 | 0.010215 | 0.018059 |
| 0.004515 | 0.004343 | 0.002813 | 0.002539 | 0.001949 | 0.002422 | 0.00157  | 0.002208 | 0.001752 | 0.006783 | 0.001409 | 0.002369 | 0.005257 | 0.005186 | 0.003241 |
| 0.005922 | 0.005079 | 0.012341 | 0.02235  | 0.092122 | 0.025414 | 0.033327 | 0.009799 | 0.013941 | 0.010722 | 0.018468 | 0.018314 | 0.014913 | 0.040657 | 0        |
| 0.011401 | 0.005352 | 0.009244 | 0.004323 | 0.006594 | 0.0024   | 0.002994 | 0.021972 | 0.002417 | 0.005016 | 0.002384 | 0.003406 | 0.033504 | 0.003282 | 0.003747 |
| 4.25E-04 | 0.011146 | 0.045468 | 0.033403 | 0.00727  | 0.034256 | 0.060698 | 0.004932 | 0.002444 | 0.004584 | 3.28E-04 | 0.030839 | 0.014116 | 0.005775 | 0.013361 |
| 0        | 0.001412 | 2.90E-05 | 0.0026   | 8.00E-05 | 2.72E-04 | 0.002863 | 0.027663 | 0        | 0.013357 | 0.010141 | 0.022229 | 0.010227 | 0.032243 | 0        |
| 2.71E-04 | 0.001407 | 2.80E-05 | 0        | 7.22E-04 | 0        | 0        | 3.90E-05 | 3.00E-05 | 0.001416 | 2.11E-04 | 3.70E-04 | 3.71E-04 | 4.72E-04 | 6.05E-04 |
| 0.003861 | 0.002465 | 0.004253 | 0.00392  | 0.001375 | 0.011156 | 0.010613 | 0.001276 | 0.001231 | 0.005616 | 9.10E-04 | 0.007188 | 0.003781 | 0.001683 | 0        |
| 0.001941 | 7.65E-04 | 0.006095 | 0.0099   | 0.003851 | 0.014665 | 0.004718 | 0.009288 | 0.004676 | 0.008098 | 0.005701 | 0        | 0.007613 | 0.008021 | 0.036017 |
| 1.42E-04 | 0.001242 | 0.00414  | 0.011299 | 2.56E-04 | 6.40E-04 | 0.005626 | 0.012402 | 0.001139 | 0.007502 | 0.004245 | 0        | 0.00808  | 0.00334  | 0        |
| 0.004763 | 0.001872 | 0.001914 | 0.003843 | 8.70E-05 | 6.70E-05 | 0.001692 | 0.003547 | 1.80E-04 | 0.004561 | 2.96E-04 | 0.001596 | 0.006219 | 2.56E-04 | 1.33E-04 |
| 1.21E-04 | 0        | 3.30E-04 | 1.02E-04 | 0.009677 | 1.61E-04 | 0        | 0.014027 | 0.003788 | 3.74E-04 | 0.014358 | 0.001295 | 2.83E-04 | 0.00269  | 0        |
| 0.001139 | 0.001828 | 0.004805 | 0.00689  | 0.004679 | 0.005463 | 0.006057 | 0.007218 | 0.00336  | 0.007688 | 0.00178  | 0.007778 | 0.004771 | 0.003176 | 0        |
| 7.85E-04 | 3.26E-04 | 5.63E-04 | 7.96E-04 | 0.00128  | 4.60E-04 | 4.10E-04 | 0.001905 | 0.001031 | 0.001501 | 6.46E-04 | 0.001331 | 0.002572 | 0.001384 | 3.40E-04 |
| 0.004354 | 9.06E-04 | 0.001035 | 0.001304 | 5.70E-04 | 1.65E-04 | 1.37E-04 | 5.79E-04 | 1.88E-04 | 5.37E-04 | 1.15E-04 | 0        | 3.19E-04 | 3.27E-04 | 3.39E-04 |
| 0.012952 | 0.003088 | 0.005712 | 0.003677 | 0.001894 | 0.002915 | 8.76E-04 | 0.002095 | 0.002567 | 0.003781 | 0.001418 | 1.56E-04 | 0.001406 | 0.001012 | 0.001673 |
| 2.64E-04 | 0.002246 | 0.002524 | 0.002664 | 0.001286 | 0.004996 | 0.001681 | 0.002094 | 0.005014 | 0.006678 | 0.002437 | 0.009684 | 0.002858 | 0.002099 | 0.007936 |
| 0.002637 | 0.001732 | 0.013197 | 0.001579 | 0.006803 | 0.02248  | 0.01396  | 0.003534 | 0.007028 | 0.012919 | 0.008388 | 0.021609 | 0.008768 | 0.010254 | 0        |
| 0        | 3.13E-04 | 0.001039 | 2.25E-04 | 3.81E-04 | 0.001326 | 1.68E-04 | 8.44E-04 | 7.79E-04 | 5.37E-04 | 0.001115 | 0.001421 | 0.003197 | 3.35E-04 | 0.001011 |
| 7.60E-05 | 0.001782 | 0.001316 | 0.004687 | 0.008855 | 0.003515 | 0.002235 | 0.007932 | 0.005588 | 0.003881 | 0.002501 | 0.002151 | 9.66E-04 | 0.002818 | 3.90E-05 |
| 0        | 0        | 0        | 2.93E-04 | 0.002282 | 5.90E-05 | 8.50E-05 | 2.24E-04 | 7.90E-05 | 3.75E-04 | 0.001643 | 0.001519 | 1.03E-04 | 0.006737 | 0        |
| 5.07E-04 | 1.75E-04 | 7.25E-04 | 3.60E-05 | 2.98E-04 | 0        | 1.78E-04 | 9.99E-04 | 1.50E-04 | 2.60E-04 | 5.00E-05 | 2.94E-04 | 0.001285 | 6.20E-05 | 4.50E-05 |
| 3.00E-04 | 3.34E-04 | 0        | 0        | 9.00E-05 | 0        | 0        | 1.06E-04 | 1.68E-04 | 0.001917 | 2.54E-04 | 9.62E-04 | 9.20E-05 | 7.37E-04 | 0        |
| 7.20E-05 | 0        | 0        | 0.002053 | 0        | 0        | 5.20E-05 | 6.80E-05 | 0        | 0        | 0.010846 | 0        | 0        | 0.002522 | 0        |
| 0        | 7.30E-04 | 0.001205 | 9.02E-04 | 5.07E-04 | 1.21E-04 | 3.70E-04 | 0        | 0        | 0        | 0.001391 | 0.003467 | 0.00186  | 0.006708 | 3.80E-05 |
| 0        | 0        | 0        | 0        | 0        | 0        | 0        | 0        | 0        | 0        | 0        | 0        | 0        | 0        | 0        |
| 6.50E-05 | 4.90E-05 | 0        | 1.52E-04 | 0        | 2.70E-05 | 2.90E-05 | 0        | 0        | 0        | 3.64E-04 | 0        | 0        | 0        | 0        |
| 5.55E-04 | 4.50E-05 | 1.33E-04 | 1.85E-04 | 2.45E-04 | 1.82E-04 | 1.75E-04 | 6.85E-04 | 2.18E-04 | 3.42E-04 | 1.01E-04 | 0.00102  | 1.29E-04 | 3.30E-04 | 1.07E-04 |
| 0        | 0        | 0        | 0        | 7.21E-04 | 2.10E-05 | 0        | 3.64E-04 | 1.95E-04 | 0        | 0.008129 | 2.30E-05 | 0.004957 | 0        | 0        |
| 7.70E-05 | 4.40E-05 | 0.001668 | 0        | 0.003339 | 0.003358 | 9.80E-04 | 0.001297 | 2.33E-04 | 0        | 0        | 0        | 0.003714 | 0.002032 | 0        |
| 2.48E-04 | 2.29E-04 | 8.80E-05 | 4.01E-04 | 1.24E-04 | 8.00E-05 | 1.26E-04 | 2.44E-04 | 0        | 4.56E-04 | 1.09E-04 | 3.85E-04 | 9.39E-04 | 2.36E-04 | 1.16E-04 |
| 1.65E-04 | 3.70E-05 | 1.80E-04 | 2.90E-05 | 8.40E-05 | 2.20E-05 | 2.00E-05 | 2.30E-04 | 4.20E-05 | 4.50E-05 | 5.40E-05 | 2.80E-05 | 4.27E-04 | 3.80E-05 | 0        |
| 7.40E-05 | 0        | 0        | 0.00183  | 4.60E-05 | 5.32E-04 | 0.001584 | 6.74E-04 | 1.69E-04 | 0.008946 | 0        | 0        | 0.018417 | 0        | 5.24E-04 |
| 0        | 7.30E-05 | 0.001187 | 0        | 0.001949 | 0.006979 | 0        | 9.40E-05 | 0        | 0        | 2.72E-04 | 0        | 1.31E-04 | 0        | 0        |
| 0        | 0        | 0        | 0        | 0        | 1.58E-04 | 0        | 0        | 2.80E-05 | 0        | 5.30E-05 | 2.15E-04 | 2.46E-04 | 1.05E-04 | 6.60E-05 |
| 0        | 0        | 4.54E-04 | 2.09E-04 | 4.50E-05 | 0        | 0        | 7.50E-05 | 2.70E-05 | 0        | 0        | 3.80E-05 | 0        | 0        | 0        |
| 4.60E-05 | 0        | 0        | 0        | 0        | 0        | 0        | 0        | 0        | 0        | 0        | 3.40E-05 | 0        | 0        | 0        |
| 2.70E-05 | 3.70E-05 | 0        | 3.50E-05 | 9.64E-04 | 0        | 0        | 2.23E-04 | 1.50E-04 | 0        | 2.12E-04 | 0        | 8.60E-05 | 0        | 0        |
| 0        | 0        | 5.80E-05 | 6.70E-05 | 0        | 1.19E-04 | 1.36E-04 | 0        | 0        | 4.20E-05 | 0        | 1.19E-04 | 0        | 0        | 0        |
| 0        | 0        | 0        | 0        | 0        | 0        | 0        | 0        | 0        | 0        | 0        | 0        | 0        | 0        | 0        |
| 0        | 0        | 0        | 0        | 0        | 0        | 0        | 0        | 0        | 0        | 0        | 0        | 0        | 0        | 0        |
| 0.002964 | 0.003747 | 0.003425 | 0.008893 | 0.007449 | 0.015299 | 0.008537 | 0.005356 | 0.00286  | 0.004659 | 0.003117 | 0.006961 | 0.018349 | 0.005294 | 0.001133 |

| CPR12    | CPR05    | CPR17    | CPR13    | CPR01    | CPR06    | SP12     | SP02     | SP14     | SP09     | SP06     | SP36     | SP33     | SP13     | SP08     |
|----------|----------|----------|----------|----------|----------|----------|----------|----------|----------|----------|----------|----------|----------|----------|
| 0.091159 | 0.003506 | 0.001018 | 5.46E-04 | 1.87E-04 | 1.61E-04 | 0.862807 | 0.814798 | 0.614602 | 0.598173 | 0.554184 | 0.554101 | 0.512281 | 0.483885 | 0.449639 |
| 0.112791 | 0.394304 | 0.176981 | 0.116733 | 0.859691 | 0.190614 | 0.015172 | 0.013274 | 0.062517 | 0.164106 | 0.0065   | 0.008466 | 0.006233 | 0.006839 | 0.106541 |
| 0.258537 | 0.207846 | 0.240029 | 0.100263 | 0.064986 | 0.186187 | 0.030395 | 3.73E-04 | 0.04378  | 0.076664 | 0.010562 | 0.072262 | 0.00518  | 0.064611 | 0.062899 |
| 0.001411 | 0.061682 | 0.21077  | 0.060816 | 0.011832 | 0.162479 | 0.001657 | 0.067767 | 0.097202 | 0.074093 | 0.003226 | 0.012716 | 0.017714 | 0.016311 | 0.088863 |
| 0.029016 | 0.016548 | 0.032257 | 0.00904  | 0.002237 | 0.038783 | 0.006773 | 0.001659 | 0.012335 | 0.019352 | 0.028011 | 0.023322 | 0.158058 | 0.059249 | 0.02844  |
| 0.269769 | 0.094914 | 0.080776 | 0.411022 | 0.001837 | 0.059812 | 9.00E-05 | 7.91E-04 | 0.026662 | 2.62E-04 | 5.22E-04 | 0.085926 | 2.31E-04 | 0.001963 | 0.042843 |
| 0.022855 | 9.55E-04 | 0.001341 | 0.002727 | 0.008357 | 0.002016 | 0.003924 | 1.37E-04 | 0.002814 | 0.013725 | 0.007701 | 0.001023 | 0.012182 | 0.00808  | 0.001115 |
| 0.0899   | 0.011578 | 0.025429 | 0.038509 | 0        | 0.090469 | 0.001754 | 1.40E-04 | 0.032983 | 0.002255 | 0.005161 | 0.029297 | 0.117724 | 0.002845 | 0.046793 |
| 0.001587 | 9.10E-05 | 0.022771 | 0.098177 | 0.015797 | 1.25E-04 | 8.92E-04 | 0.001844 | 0.002196 | 0.004218 | 0.246792 | 0.032162 | 0.015646 | 0.178109 | 0.006858 |
| 0        | 0.078755 | 0.039879 | 0.047322 | 1.32E-04 | 0.123614 | 0.009647 | 0.018994 | 0.026803 | 0.004247 | 0.057358 | 0.081184 | 0.005735 | 0.062169 | 0.061822 |
| 0.009068 | 0.004402 | 0.002195 | 0.005298 | 5.53E-04 | 0.004439 | 0.014206 | 0.004403 | 0.017812 | 0.010868 | 0.020622 | 0.005324 | 0        | 0.024584 | 0.001584 |
| 0.038119 | 0.011616 | 0.01988  | 0.00469  | 0.006522 | 0.010668 | 0.002232 | 2.57E-04 | 0.010438 | 0.001997 | 0.001411 | 0.013378 | 0.001172 | 0.00525  | 0.018278 |
| 0.017492 | 0.003683 | 0.006328 | 0.002597 | 3.10E-05 | 0.044745 | 7.56E-04 | 1.70E-04 | 1.54E-04 | 0.001466 | 0.003514 | 0.010218 | 0.052458 | 0.003658 | 1.96E-04 |
| 0.001249 | 3.30E-04 | 0.034855 | 0.022096 | 0.001872 | 0.001108 | 0.028508 | 0.051486 | 3.78E-04 | 0        | 0.008377 | 0.001039 | 0.02024  | 0.032908 | 0.003251 |
| 0.004444 | 0.009659 | 0.007981 | 7.20E-05 | 5.20E-05 | 0.007166 | 0        | 0        | 4.21E-04 | 2.12E-04 | 5.63E-04 | 3.54E-04 | 1.37E-04 | 7.28E-04 | 5.30E-05 |
| 0.004121 | 1.48E-04 | 1.19E-04 | 1.85E-04 | 2.30E-05 | 0.001308 | 7.53E-04 | 0        | 0.001564 | 7.42E-04 | 8.81E-04 | 0        | 0        | 4.21E-04 | 5.00E-05 |
| 0.005885 | 0.002458 | 6.65E-04 | 0.009593 | 0        | 0.001717 | 9.80E-05 | 0.002283 | 0.001841 | 0.001045 | 9.89E-04 | 0.01964  | 3.60E-04 | 7.63E-04 | 0        |
| 0        | 0.012753 | 0.006031 | 0.003209 | 4.10E-05 | 0.011177 | 0.001183 | 0        | 0.00125  | 5.17E-04 | 0.001617 | 0.005384 | 7.10E-05 | 0.002948 | 0.001649 |
| 0        | 0.009876 | 0.021323 | 0.024038 | 2.10E-04 | 0.00993  | 1.58E-04 | 0        | 0.004188 | 3.78E-04 | 0        | 4.13E-04 | 0        | 1.21E-04 | 2.26E-04 |
| 0        | 0.002093 | 0.001639 | 0.004897 | 3.20E-05 | 0.003985 | 1.08E-04 | 0.001317 | 0.004882 | 0        | 0.002051 | 0.003884 | 8.60E-05 | 0.003436 | 0.027106 |
| 0.006843 | 0.004057 | 0.009261 | 0        | 0.005151 | 0.018867 | 0        | 0        | 0        | 2.47E-04 | 7.20E-05 | 6.20E-05 | 0        | 0        | 0        |
| 0.003132 | 0        | 0.003902 | 0.003538 | 0.005391 | 0.003541 | 3.87E-04 | 0        | 0        | 0.005139 | 6.14E-04 | 0.001505 | 1.80E-05 | 6.04E-04 | 0.017181 |
| 0.003701 | 0.001545 | 0.00117  | 2.36E-04 | 3.41E-04 | 0.002914 | 7.62E-04 | 4.00E-05 | 7.68E-04 | 0.002014 | 6.99E-04 | 0.003095 | 0        | 0.003037 | 4.06E-04 |
| 0        | 8.70E-05 | 0        | 0        | 0        | 0        | 0.008344 | 0.00791  | 0.012788 | 0.002551 | 0.009686 | 0.003004 | 0        | 0.011229 | 4.98E-04 |
| 0        | 4.18E-04 | 1.33E-04 | 0        | 0        | 2.92E-04 | 0.006136 | 0.008449 | 0.006994 | 0.002726 | 0.018017 | 0.007387 | 0        | 0.016322 | 0.004921 |
| 0.001116 | 8.43E-04 | 0.00468  | 0.001453 | 2.10E-05 | 6.29E-04 | 0        | 9.60E-05 | 0.004421 | 5.04E-04 | 6.04E-04 | 0.002165 | 2.04E-04 | 2.21E-04 | 0.017673 |
| 0.008522 | 0.017225 | 0.008718 | 0.007738 | 0.002651 | 0.008554 | 8.63E-04 | 5.74E-04 | 5.60E-05 | 0.005165 | 0.004406 | 9.14E-04 | 1.10E-05 | 1.27E-04 | 1.30E-04 |
| 6.80E-04 | 1.30E-05 | 4.58E-04 | 9.60E-05 | 0.001314 | 0.001789 | 8.90E-05 | 0        | 0        | 5.80E-05 | 4.81E-04 | 0.002955 | 0.010046 | 1.86E-04 | 0        |
| 0.004376 | 0.009207 | 0.009229 | 0.00567  | 0.002374 | 0.003893 | 1.72E-04 | 7.40E-05 | 4.23E-04 | 3.37E-04 | 0        | 0.001554 | 7.60E-05 | 1.56E-04 | 4.78E-04 |
| 2.99E-04 | 0.005142 | 0        | 7.20E-05 | 0.003436 | 2.99E-04 | 6.53E-04 | 1.41E-04 | 6.43E-04 | 0.001672 | 7.20E-05 | 6.80E-05 | 0        | 1.13E-04 | 0        |
| 7.07E-04 | 1.33E-04 | 1.89E-04 | 4.50E-05 | 0        | 0.001386 | 2.78E-04 | 0        | 1.57E-04 | 5.14E-04 | 0.001023 | 2.60E-04 | 4.60E-05 | 0.002579 | 0        |
| 0.002251 | 2.22E-04 | 4.45E-04 | 1.75E-04 | 0.001676 | 0.001699 | 8.80E-05 | 0        | 4.70E-05 | 5.15E-04 | 0        | 1.61E-04 | 8.90E-05 | 5.70E-05 | 0        |
| 0        | 0.010079 | 0        | 0        | 0        | 0        | 7.90E-05 | 4.00E-05 | 0.001773 | 0.001127 | 0        | 1.05E-04 | 0        | 0        | 5.00E-05 |
| 0        | 0.008023 | 0.012184 | 2.80E-04 | 0        | 3.23E-04 | 0        | 0        | 5.80E-05 | 5.90E-05 | 0        | 4.02E-04 | 0.001401 | 6.00E-05 | 1.33E-04 |
| 0        | 0        | 0        | 0        | 5.50E-05 | 0        | 0        | 4.20E-05 | 4.40E-05 | 0        | 1.43E-04 | 0        | 0.027264 | 0        | 0.002064 |
| 0        | 0.001012 | 0        | 4.40E-05 | 2.80E-05 | 1.23E-04 | 0        | 8.50E-05 | 0        | 0        | 0        | 0        | 0        | 0        | 8.60E-05 |
| 6.70E-05 | 3.70E-05 | 0.001317 | 3.20E-05 | 5.70E-05 | 3.70E-05 | 5.59E-04 | 0.001707 | 0.003779 | 9.38E-04 | 7.46E-04 | 4.13E-04 | 2.00E-05 | 0.001315 | 0.003557 |
| 1.59E-04 | 0        | 0        | 0        | 0        | 0        | 0        | 0        | 0        | 0        | 0        | 0        | 1.50E-05 | 0        | 0        |
| 0.00203  | 0        | 0.007168 | 0        | 3.17E-04 | 0        | 0        | 0        | 0        | 0        | 0        | 0        | 4.02E-04 | 5.10E-05 | 0        |
| 3.76E-04 | 2.68E-04 | 1.84E-04 | 5.46E-04 | 0        | 5.62E-04 | 9.30E-05 | 0        | 0.001505 | 1.07E-04 | 6.13E-04 | 5.05E-04 | 0        | 8.12E-04 | 8.15E-04 |
| 4.43E-04 | 1.47E-04 | 0        | 7.20E-05 | 0        | 1.57E-04 | 9.60E-05 | 0        | 4.90E-05 | 1.13E-04 | 3.46E-04 | 0        | 0        | 7.51E-04 | 0        |
| 0        | 0        | 1.25E-04 | 0.003161 | 5.50E-05 | 0        | 0        | 0        | 1.54E-04 | 0        | 0        | 0.003537 | 9.50E-05 | 1.20E-04 | 0        |
| 0        | 0        | 9.18E-04 | 0.001577 | 0        | 0        | 0        | 4.00E-05 | 0        | 0        | 0        | 4.30E-05 | 0        | 0        | 0        |
| 1.27E-04 | 0        | 0        | 0        | 0        | 0        | 0        | 0        | 5.00E-05 | 0        | 2.65E-04 | 4.16E-04 | 0        | 7.29E-04 | 0        |
| 0        | 0        | 7.30E-05 | 0        | 0.001016 | 0        | 0        | 0        | 0        | 0        | 0        | 2.80E-05 | 3.60E-05 | 6.00E-05 | 0        |
| 0        | 3.90E-05 | 0        | 0        | 0        | 0        | 0        | 0        | 5.70E-05 | 0        | 1.46E-04 | 0        | 0        | 0        | 4.70E-05 |
| 0        | 0.001719 | 3.30E-05 | 5.66E-04 | 0        | 5.58E-04 | 0        | 0        | 0        | 0        | 0        | 7.30E-05 | 0.00336  | 6.90E-05 | 4.60E-05 |
| 4.20E-05 | 0        | 0        | 1.84E-04 | 0        | 0        | 0        | 0        | 0        | 1.89E-04 | 7.70E-05 | 4.60E-05 | 0        | 0        | 0        |
| 0        | 0        | 0        | 0        | 0        | 0        | 0        | 0        | 0        | 0        | 0        | 0        | 1.20E-05 | 0        | 0        |
| 0        | 0        | 0        | 0        | 0        | 0        | 0        | 0        | 0        | 0        | 0        | 0        | 0        | 0        | 0        |
| 0.007726 | 0.012587 | 0.007546 | 0.012685 | 0.001725 | 0.003874 | 2.88E-04 | 0.001109 | 0.001412 | 0.001705 | 0.001948 | 0.011209 | 0.031397 | 0.002524 | 0.003709 |

| SP32     | SP30     | SP07     | SP01     | SP24     | SP05     | SP26     | SP20     | SP04     | SP35     | SP15     | SP27     | SP22     | SP31     | SP18     |
|----------|----------|----------|----------|----------|----------|----------|----------|----------|----------|----------|----------|----------|----------|----------|
| 0.41997  | 0.379136 | 0.310352 | 0.302701 | 0.302618 | 0.294834 | 0.204334 | 0.140265 | 0.128566 | 0.113041 | 0.111284 | 0.105052 | 0.090704 | 0.054544 | 0.043545 |
| 0.082651 | 0.050382 | 0.421217 | 0.00199  | 0.076254 | 0.495194 | 0.250743 | 0.250877 | 0.516112 | 0.127327 | 0.232446 | 0.512543 | 0.642976 | 0.044107 | 0.387463 |
| 0.081657 | 0.06169  | 0.014189 | 0.374652 | 0.053438 | 0.028267 | 0.170205 | 0.03515  | 0.093043 | 0.151227 | 0.172156 | 0.177285 | 0.049866 | 0.168276 | 0.076966 |
| 0.081722 | 0.098459 | 0.105076 | 0        | 0.053986 | 0.078954 | 0.107967 | 0.094154 | 0.006021 | 0.147353 | 0.196401 | 0.002567 | 0.088793 | 0.066048 | 0.300225 |
| 0.083767 | 0.081868 | 0.002206 | 0.030663 | 0.027447 | 0.016514 | 0.081076 | 0.074487 | 0.038888 | 0.181264 | 0.145287 | 0.003803 | 0.006715 | 0.554848 | 0.012168 |
| 0.01388  | 0.093866 | 0.024841 | 4.53E-04 | 0.072602 | 0.012958 | 0.037555 | 0.002891 | 0.00529  | 2.26E-04 | 0.011762 | 1.52E-04 | 9.25E-04 | 1.62E-04 | 0.002784 |
| 0.005317 | 0.005689 | 3.56E-04 | 0.005082 | 0.007982 | 0.004661 | 0.012264 | 0.003319 | 0.023516 | 0.029359 | 0.010534 | 0.003705 | 0.037702 | 0.026459 | 0.04538  |
| 0.047408 | 0.064723 | 0.018655 | 0.001016 | 0.031704 | 0.003999 | 0.003359 | 0.002467 | 0.101544 | 0.089912 | 0.015178 | 0.001779 | 0.011569 | 0.031005 | 0.002944 |
| 0.012422 | 0.015285 | 0.001674 | 0.001688 | 0.020163 | 2.59E-04 | 0.007249 | 0.019644 | 0.002059 | 0.007857 | 0.002417 | 2.23E-04 | 0.007301 | 4.86E-04 | 0.001393 |
| 0.053512 | 0.048079 | 0.005796 | 2.10E-05 | 0.097498 | 0.003703 | 0.038983 | 0.267653 | 0.004593 | 0.0064   | 0.005981 | 0.01683  | 0.012821 | 5.80E-05 | 0.002027 |
| 0.004636 | 1.20E-05 | 0.014929 | 1.60E-05 | 0.009508 | 0.020228 | 0.009196 | 0.012316 | 0.028999 | 0.001642 | 0.017015 | 0.006766 | 0.014371 | 0.003935 | 0.004573 |
| 0.013009 | 0.005042 | 0.010729 | 0        | 0.014923 | 0.00873  | 0.009505 | 0.005927 | 0.00389  | 0.021342 | 0.004933 | 0.009814 | 0.001195 | 0.014617 | 0.017192 |
| 0.007647 | 0.013445 | 5.70E-04 | 0.030267 | 0.001546 | 0.001948 | 0.007496 | 0.002075 | 5.79E-04 | 0.016585 | 0.005813 | 5.33E-04 | 8.15E-04 | 0.013586 | 0.001191 |
| 0.016954 | 0.010302 | 0.040127 | 2.90E-04 | 0.074949 | 2.84E-04 | 0.002949 | 0.00349  | 1.47E-04 | 0.034859 | 2.14E-04 | 2.27E-04 | 0        | 5.79E-04 | 1.52E-04 |
| 0.001328 | 0.002159 | 0        | 0        | 0.011062 | 2.64E-04 | 0.002205 | 5.98E-04 | 0        | 8.76E-04 | 0.001578 | 4.73E-04 | 0.002428 | 4.20E-05 | 0.012544 |
| 2.72E-04 | 0        | 0        | 2.50E-05 | 0.001128 | 9.39E-04 | 1.44E-04 | 1.43E-04 | 0.013387 | 5.51E-04 | 0.001017 | 1.62E-04 | 0.005263 | 3.58E-04 | 0.001237 |
| 0.018775 | 0.007404 | 0.007816 | 2.50E-05 | 0.005218 | 9.54E-04 | 2.20E-05 | 0.008152 | 0.001448 | 0.038269 | 0.001945 | 0.00195  | 0.004796 | 6.31E-04 | 3.16E-04 |
| 0.005572 | 0.00208  | 1.12E-04 | 0        | 0.008231 | 8.10E-04 | 0.001628 | 0.002154 | 8.69E-04 | 2.89E-04 | 0.003815 | 0.014131 | 3.93E-04 | 1.78E-04 | 0.008781 |
| 0.002365 | 1.64E-04 | 1.13E-04 | 0        | 0.001275 | 0.001717 | 0.005328 | 0.004237 | 0.006929 | 2.86E-04 | 8.87E-04 | 0.011127 | 0        | 6.30E-05 | 0.007369 |
| 0.009931 | 0.020186 | 0.001945 | 0        | 6.09E-04 | 3.67E-04 | 0.006902 | 0.005316 | 7.18E-04 | 0.00429  | 2.66E-04 | 0.003509 | 0        | 0        | 3.64E-04 |
| 3.10E-05 | 0        | 0        | 1.40E-04 | 3.47E-04 | 0.001192 | 1.97E-04 | 2.96E-04 | 0.001697 | 3.88E-04 | 0.006639 | 0.002702 | 5.50E-04 | 0.003937 | 0.016447 |
| 0.002818 | 0.001853 | 0.001047 | 1.90E-05 | 0.005014 | 0.004408 | 0.003322 | 0.004138 | 0.008087 | 1.58E-04 | 0.008685 | 0.086973 | 0.006636 | 0.001082 | 0.006837 |
| 4.33E-04 | 1.30E-05 | 0.002028 | 0        | 9.93E-04 | 0.002537 | 0.002504 | 0.00193  | 0.00431  | 7.96E-04 | 0.009693 | 0.006474 | 0.001778 | 0.002708 | 0.002199 |
| 6.78E-04 | 0        | 0.005648 | 0        | 0.011588 | 0.002309 | 0.001245 | 0.008861 | 0.001021 | 0        | 0.001015 | 0.002245 | 0.00328  | 6.10E-05 | 1.04E-04 |
| 0.002491 | 0        | 0.002223 | 0        | 0.007854 | 0.002033 | 0.002658 | 0.017542 | 0.001169 | 1.26E-04 | 0.001892 | 0.003061 | 0.002547 | 0        | 3.19E-04 |
| 0.012808 | 0.001506 | 0.001018 | 2.30E-05 | 8.41E-04 | 0.00102  | 0.00814  | 0.004484 | 4.13E-04 | 0.001763 | 7.21E-04 | 0.003572 | 0.002256 | 2.70E-05 | 0.001394 |
| 1.79E-04 | 0.001169 | 5.84E-04 | 0        | 0.013598 | 2.63E-04 | 1.21E-04 | 0.004537 | 7.23E-04 | 8.00E-05 | 3.72E-04 | 0.010989 | 4.01E-04 | 1.21E-04 | 8.99E-04 |
| 2.74E-04 | 1.86E-04 | 1.06E-04 | 0.134321 | 8.50E-04 | 0        | 7.37E-04 | 0        | 0        | 1.29E-04 | 2.06E-04 | 0        | 0        | 0        | 0        |
| 9.51E-04 | 0.001344 | 1.08E-04 | 0.001923 | 0.015166 | 0.001248 | 0.007588 | 0.002653 | 1.44E-04 | 2.51E-04 | 0.006815 | 0.001649 | 1.33E-04 | 1.41E-04 | 0.003043 |
| 1.03E-04 | 7.07E-04 | 0        | 3.50E-05 | 0.005864 | 0.001653 | 0.001487 | 0.002626 | 1.47E-04 | 5.10E-05 | 0.006132 | 6.68E-04 | 1.29E-04 | 5.60E-05 | 0.013632 |
| 2.67E-04 | 4.10E-05 | 1.18E-04 | 6.50E-05 | 0        | 6.99E-04 | 8.45E-04 | 7.13E-04 | 4.17E-04 | 4.38E-04 | 0.003834 | 1.36E-04 | 4.09E-04 | 0.004584 | 2.31E-04 |
| 6.55E-04 | 1.20E-04 | 0        | 7.50E-05 | 7.63E-04 | 4.52E-04 | 0.001502 | 1.45E-04 | 1.41E-04 | 4.10E-05 | 2.77E-04 | 8.81E-04 | 0        | 0.00513  | 0.002051 |
| 7.40E-05 | 4.90E-04 | 1.25E-04 | 0        | 0.001023 | 4.41E-04 | 0.001562 | 9.51E-04 | 2.84E-04 | 8.60E-05 | 0.002806 | 8.18E-04 | 1.36E-04 | 0        | 0.015046 |
| 3.21E-04 | 0.001145 | 0        | 2.10E-05 | 0.005833 | 0        | 1.27E-04 | 0.001634 | 1.35E-04 | 6.30E-05 | 3.98E-04 | 1.48E-04 | 2.65E-04 | 0        | 0.001006 |
| 0.001692 | 0.011636 | 0        | 0.008257 | 0        | 0        | 1.86E-04 | 8.90E-05 | 0        | 0.014605 | 0        | 0        | 1.31E-04 | 8.09E-04 | 1.89E-04 |
| 9.10E-05 | 4.30E-05 | 1.14E-04 | 0        | 0        | 0        | 0        | 0        | 0        | 0        | 0        | 0        | 0        | 0        | 0        |
| 2.67E-04 | 0.003256 | 0.004412 | 0.020085 | 0.008423 | 0.003597 | 0.001084 | 2.68E-04 | 0        | 1.40E-05 | 9.15E-04 | 8.30E-05 | 7.83E-04 | 0        | 3.35E-04 |
| 0        | 4.80E-05 | 0        | 3.80E-05 | 0.004378 | 0        | 0        | 0        | 0        | 1.40E-05 | 0        | 0.0018   | 0        | 0        | 5.20E-05 |
| 3.27E-04 | 5.83E-04 | 0        | 0        | 0.001341 | 0        | 8.20E-05 | 0.001432 | 0        | 0.002979 | 4.50E-05 | 0        | 0        | 2.97E-04 | 5.40E-05 |
| 2.04E-04 | 0        | 3.54E-04 | 0        | 3.80E-05 | 5.23E-04 | 0.001462 | 0.001062 | 2.93E-04 | 4.90E-05 | 3.42E-04 | 0.00102  | 1.39E-04 | 6.70E-05 | 2.20E-04 |
| 8.00E-05 | 0        | 0        | 0        | 0        | 6.77E-04 | 2.31E-04 | 5.11E-04 | 2.78E-04 | 1.55E-04 | 0.001065 | 0        | 1.55E-04 | 1.18E-04 | 1.96E-04 |
| 6.76E-04 | 1.71E-04 | 0        | 0        | 0        | 1.81E-04 | 1.90E-05 | 0.004769 | 1.53E-04 | 4.40E-05 | 0        | 0        | 0        | 0        | 4.60E-05 |
| 1.70E-04 | 7.43E-04 | 0        | 0        | 0.003913 | 0        | 0        | 3.18E-04 | 0        | 1.70E-05 | 1.68E-04 | 0        | 0        | 0        | 5.80E-05 |
| 2.60E-05 | 0        | 0        | 0        | 4.09E-04 | 0        | 2.40E-05 | 0        | 0        | 0        | 0        | 0        | 0        | 0        | 0        |
| 0        | 0        | 0        | 0.057925 | 0        | 0        | 3.04E-04 | 0        | 0        | 2.38E-04 | 4.80E-05 | 0        | 0        | 0        | 0        |
| 3.10E-05 | 1.20E-05 | 0        | 0.022988 | 0        | 8.70E-05 | 1.73E-04 | 3.60E-05 | 0        | 0        | 0        | 0        | 0        | 0        | 4.60E-05 |
| 1.53E-04 | 7.03E-04 | 0        | 0        | 0        | 9.30E-05 | 7.50E-05 | 3.50E-05 | 0        | 0        | 0        | 7.30E-05 | 0        | 3.30E-05 | 0        |
| 3.20E-05 | 0        | 0        | 0        | 7.90E-05 | 1.70E-04 | 0        | 2.41E-04 | 0.001153 | 0        | 1.95E-04 | 0.001472 | 6.84E-04 | 0        | 0        |
| 6.90E-05 | 7.80E-05 | 0        | 0        | 0        | 0        | 4.70E-05 | 0        | 0        | 1.90E-05 | 0        | 0        | 0        | 5.20E-05 | 0        |
| 0        | 0        | 0        | 0        | 0.013628 | 0        | 0        | 0        | 0        | 0        | 0        | 0        | 0        | 0        | 0        |
| 0.011304 | 0.014182 | 0.001412 | 0.005196 | 0.025916 | 8.33E-04 | 0.005168 | 0.005414 | 0.002837 | 0.004541 | 0.006808 | 0.002605 | 9.55E-04 | 7.95E-04 | 0.006982 |

| SP11     | SP25     | SP34     | SP03     | SP17     | SP21     | SP29     | SP28     | SP23     | SP19     | SP16     | SP10     | SP37     | SPR22    | SPR05    |
|----------|----------|----------|----------|----------|----------|----------|----------|----------|----------|----------|----------|----------|----------|----------|
| 0.036769 | 0.021265 | 0.017734 | 0.016857 | 0.014905 | 0.013392 | 0.011254 | 0.006827 | 0.005739 | 0.002104 | 8.98E-04 | 4.82E-04 | 3.82E-04 | 0.966318 | 0.930982 |
| 0.373482 | 0.296529 | 0.051732 | 0.378987 | 0.453523 | 0.00969  | 0.591233 | 0.621842 | 0.1911   | 0.036955 | 9.00E-04 | 0.165012 | 0.27726  | 9.26E-04 | 0.001409 |
| 0.116011 | 0.011147 | 0.086583 | 0.112748 | 0.022218 | 0.006707 | 0.115925 | 0.114854 | 0.074289 | 0.002088 | 0.002119 | 0.205909 | 0.014335 | 0.002751 | 0.003654 |
| 0.22649  | 0.575301 | 0.193154 | 0.004885 | 0.23246  | 0.001216 | 0.174566 | 0.004944 | 0.029837 | 0.855905 | 3.27E-04 | 0.055668 | 4.33E-04 | 0.002896 | 0.001531 |
| 0.036097 | 0.007405 | 0.128299 | 0.04011  | 0.039743 | 0.770731 | 0.021486 | 0.048169 | 0.34225  | 0.0017   | 0.863198 | 0.27958  | 0.079581 | 0.002905 | 0.003004 |
| 0.002664 | 0.003056 | 0.005257 | 0.024471 | 0.002448 | 1.50E-04 | 0.004184 | 0.00189  | 0.016007 | 0.001032 | 9.80E-05 | 0.015639 | 0.011904 | 0.003687 | 0.003673 |
| 0.006421 | 0.0308   | 0.08077  | 0.141981 | 0.081115 | 0.036363 | 0.029527 | 0.039295 | 0.005243 | 0.010445 | 0.014181 | 0.111027 | 0.152348 | 4.74E-04 | 0.001879 |
| 0.088472 | 0.004726 | 0.029475 | 0.13184  | 0.004067 | 0.064807 | 0.001723 | 0.001478 | 0.011126 | 7.20E-04 | 0.107167 | 0.028804 | 0.159194 | 2.70E-05 | 0.001821 |
| 0.00413  | 0.001507 | 0.087275 | 0.018625 | 0.001089 | 0.001324 | 1.15E-04 | 0.01618  | 0.014674 | 0.009634 | 7.60E-05 | 0.00424  | 0.003143 | 5.70E-05 | 4.60E-05 |
| 0.004795 | 0.001715 | 0.012132 | 0.006139 | 0.001134 | 0.013389 | 0.005267 | 0.013862 | 0.040708 | 0.008828 | 1.56E-04 | 7.70E-05 | 3.25E-04 | 0.001238 | 0.01407  |
| 0.0081   | 0.00465  | 0.002122 | 0.024245 | 0.011607 | 0.043504 | 0.001828 | 0.012945 | 0.015439 | 0.006601 | 0.00506  | 0.019073 | 0.008758 | 0.010796 | 0.010064 |
| 0.028202 | 0.00523  | 0.037753 | 0.00144  | 0.01279  | 0        | 0.013831 | 0.015033 | 0.004761 | 0.003761 | 1.24E-04 | 0.004173 | 0.019695 | 0.001185 | 0.001646 |
| 0.009062 | 2.55E-04 | 0.041708 | 0.003781 | 0.00513  | 7.45E-04 | 2.53E-04 | 0.015074 | 9.55E-04 | 1.57E-04 | 1.37E-04 | 0.011894 | 0.023284 | 3.10E-05 | 3.90E-04 |
| 0.002625 | 8.08E-04 | 0.028694 | 0.003002 | 4.71E-04 | 5.48E-04 | 5.16E-04 | 0.001249 | 0.002787 | 0.041205 | 6.70E-05 | 0.002096 | 0.00234  | 2.39E-04 | 0.001443 |
| 8.75E-04 | 0.004554 | 0.034749 | 0.001971 | 0.031387 | 0        | 0.005775 | 0.001249 | 2.78E-04 | 0.001205 | 3.60E-05 | 0.01978  | 2.52E-04 | 0        | 1.70E-04 |
| 0.003069 | 0.001877 | 7.56E-04 | 0.037096 | 0.001895 | 0.013305 | 8.80E-05 | 6.17E-04 | 3.40E-04 | 0        | 0.003894 | 0.010227 | 0.025827 | 0        | 6.50E-04 |
| 0.006776 | 4.90E-05 | 0.012961 | 0.008658 | 3.68E-04 | 0        | 0.001683 | 1.28E-04 | 0.09469  | 0        | 0        | 0.002323 | 0.002606 | 1.66E-04 | 9.90E-05 |
| 8.39E-04 | 0.001169 | 0.02783  | 2.54E-04 | 0.001677 | 6.10E-05 | 0.004427 | 0.00224  | 0.004638 | 2.05E-04 | 3.00E-05 | 5.25E-04 | 0.012928 | 1.69E-04 | 0.001212 |
| 8.79E-04 | 0.005307 | 0.021559 | 1.34E-04 | 0.0027   | 0        | 0        | 7.61E-04 | 0.006041 | 7.30E-05 | 2.80E-05 | 0.011201 | 0.010048 | 2.90E-05 | 5.10E-05 |
| 0.003611 | 7.17E-04 | 0.005367 | 0.001547 | 2.62E-04 | 0.001564 | 0.001109 | 0.00223  | 0.016554 | 0.001334 | 0        | 0.003285 | 4.26E-04 | 1.57E-04 | 1.29E-04 |
| 0.003932 | 2.04E-04 | 9.38E-04 | 0.006581 | 0.005055 | 0        | 4.02E-04 | 0.002346 | 2.00E-04 | 1.45E-04 | 3.70E-05 | 1.55E-04 | 0        | 0        | 5.10E-05 |
| 0.001782 | 8.40E-05 | 0.005741 | 0.002927 | 0.010724 | 0        | 0.002986 | 0.0138   | 0.064618 | 8.41E-04 | 3.00E-05 | 0.00512  | 0        | 1.10E-04 | 0        |
| 0.006718 | 5.81E-04 | 0.00102  | 0.004951 | 0.002256 | 0.002482 | 0.00156  | 0.021337 | 0.016396 | 4.87E-04 | 6.86E-04 | 0.012105 | 0.005503 | 1.16E-04 | 3.35E-04 |
| 7.10E-04 | 3.18E-04 | 5.00E-05 | 3.74E-04 | 0        | 0.001383 | 0        | 3.79E-04 | 3.90E-04 | 4.33E-04 | 3.20E-05 | 0        | 0        | 0.001123 | 0.005919 |
| 7.61E-04 | 3.60E-04 | 0        | 9.35E-04 | 3.46E-04 | 8.20E-04 | 3.91E-04 | 3.73E-04 | 0.001277 | 1.27E-04 | 0        | 0        | 5.10E-05 | 0.002319 | 0.009163 |
| 0.011577 | 7.05E-04 | 0.007415 | 0.00406  | 0.001675 | 0        | 0.002462 | 0.01185  | 0.007033 | 0.001186 | 2.40E-05 | 0.001126 | 0.006616 | 3.10E-05 | 0        |
| 1.01E-04 | 8.23E-04 | 2.13E-04 | 0.001853 | 0.002768 | 1.14E-04 | 2.66E-04 | 0.010531 | 0.001749 | 0.002589 | 5.30E-05 | 4.48E-04 | 0.003529 | 0        | 0        |
| 0        | 0        | 0.004405 | 0.001192 | 0        | 0.00158  | 4.50E-05 | 1.24E-04 | 7.60E-05 | 0        | 2.40E-05 | 0.001722 | 0        | 0        | 2.80E-04 |
| 0.002553 | 9.04E-04 | 1.64E-04 | 5.48E-04 | 6.58E-04 | 4.10E-05 | 0.002407 | 1.38E-04 | 0.00104  | 0.002333 | 5.00E-05 | 1.46E-04 | 3.23E-04 | 0        | 0        |
| 0.001842 | 0.001032 | 7.84E-04 | 0.001433 | 0.006733 | 0        | 8.50E-04 | 0        | 1.89E-04 | 0.001796 | 3.20E-05 | 0        | 4.33E-04 | 3.20E-05 | 5.60E-05 |
| 0.002215 | 4.50E-05 | 0.001472 | 0.001862 | 0.001974 | 0.009671 | 2.50E-05 | 0.004822 | 3.66E-04 | 1.62E-04 | 9.10E-05 | 0.009081 | 0.007858 | 6.80E-05 | 1.01E-04 |
| 0.001414 | 0.001092 | 0.004091 | 0.002884 | 0.011144 | 1.04E-04 | 8.99E-04 | 0.002869 | 5.54E-04 | 1.36E-04 | 1.10E-04 | 0.004809 | 0.013996 | 2.40E-05 | 5.00E-05 |
| 0        | 0.005572 | 0.008161 | 0        | 0.001522 | 0        | 0        | 3.57E-04 | 0        | 0.001001 | 0        | 0        | 0        | 2.60E-05 | 0        |
| 8.80E-05 | 0.005908 | 0.005264 | 1.39E-04 | 0.014097 | 0        | 4.00E-04 | 2.57E-04 | 0        | 2.05E-04 | 0        | 6.80E-04 | 1.40E-04 | 2.70E-05 | 0        |
| 4.50E-05 | 1.18E-04 | 0.005865 | 0        | 8.00E-05 | 0        | 5.80E-04 | 0        | 0        | 0        | 9.00E-05 | 6.90E-05 | 0        | 0        | 1.03E-04 |
| 0        | 4.60E-05 | 0        | 0        | 0.002366 | 0        | 0        | 0        | 6.90E-05 | 0        | 0        | 0        | 0.146195 | 0        | 0        |
| 4.35E-04 | 1.50E-04 | 0        | 0        | 0.00115  | 0        | 4.30E-05 | 0        | 7.10E-05 | 4.39E-04 | 3.30E-05 | 0        | 0        | 0.00169  | 0.001164 |
| 3.58E-04 | 0        | 3.14E-04 | 0.004095 | 0        | 0        | 0        | 0        | 0        | 0        | 0        | 7.20E-05 | 1.33E-04 | 0        | 0        |
| 2.54E-04 | 2.45E-04 | 0.014602 | 0        | 0.003717 | 5.50E-05 | 1.27E-04 | 1.30E-04 | 6.80E-05 | 1.38E-04 | 0        | 0        | 6.70E-05 | 0        | 0        |
| 7.63E-04 | 0        | 2.73E-04 | 2.73E-04 | 2.72E-04 | 0.002601 | 1.81E-04 | 0.001222 | 0.003106 | 0        | 0        | 0.00169  | 0.001478 | 1.13E-04 | 2.40E-04 |
| 5.56E-04 | 0        | 3.58E-04 | 6.54E-04 | 6.62E-04 | 0.002274 | 0        | 0.001704 | 5.48E-04 | 0        | 1.42E-04 | 0.004986 | 0.002224 | 0        | 9.90E-05 |
| 9.30E-05 | 3.90E-05 | 0.007182 | 0        | 0        | 0        | 0        | 0        | 6.75E-04 | 0        | 0        | 0        | 0        | 0        | 4.80E-05 |
| 0        | 1.86E-04 | 0.005098 | 0        | 7.86E-04 | 0        | 0        | 0        | 0        | 2.10E-04 | 0        | 0        | 0        | 1.06E-04 | 0        |
| 0        | 0        | 0        | 0        | 0        | 6.40E-05 | 0        | 0        | 0        | 0        | 0        | 0        | 0        | 0        | 0.003965 |
| 4.60E-05 | 0        | 6.36E-04 | 0        | 0        | 5.60E-05 | 0        | 7.26E-04 | 0        | 0        | 0        | 0        | 0        | 0        | 5.20E-05 |
| 0        | 0        | 0        | 0        | 0        | 6.80E-05 | 4.90E-05 | 0        | 0        | 0        | 0        | 0        | 0        | 0        | 0        |
| 3.44E-04 | 1.14E-04 | 1.63E-04 | 1.32E-04 | 0.006885 | 6.40E-05 | 0        | 2.58E-04 | 0        | 0        | 0        | 0        | 0        | 0        | 0        |
| 2.00E-04 | 0        | 0        | 4.16E-04 | 0        | 0        | 0        | 1.37E-04 | 0.018354 | 0        | 0        | 5.59E-04 | 6.10E-05 | 0        | 0        |
| 0        | 3.90E-05 | 1.50E-05 | 1.36E-04 | 0        | 0        | 0        | 0        | 0        | 0        | 0        | 0        | 2.44E-04 | 0        | 0        |
| 0        | 0        | 0        | 0        | 0        | 0        | 0        | 0        | 0        | 0        | 0        | 0        | 0        | 0        | 0        |
| 0.003844 | 0.003368 | 0.019866 | 0.005784 | 0.004141 | 0.001127 | 0.001537 | 0.005773 | 0.005765 | 0.00382  | 7.00E-05 | 0.006217 | 0.00608  | 1.64E-04 | 4.51E-04 |

| SPR11    | SPR10    | SPR21    | SPR19    | SPR38    | SPR23    | SPR14    | SPR34    | SPR03    | SPR17    | SPR08    | SPR40    | SPR27    | SPR01    | SPR28    |
|----------|----------|----------|----------|----------|----------|----------|----------|----------|----------|----------|----------|----------|----------|----------|
| 0.922703 | 0.914811 | 0.906991 | 0.902223 | 0.848981 | 0.811681 | 0.794854 | 0.761146 | 0.752579 | 0.687908 | 0.667087 | 0.65643  | 0.63808  | 0.562759 | 0.485711 |
| 0.003517 | 9.93E-04 | 0.006317 | 0.012932 | 0.001474 | 0.002882 | 0.020986 | 0.002843 | 0.003675 | 0.014471 | 0.030786 | 0.005616 | 0.027821 | 0.005005 | 0.027315 |
| 0.004876 | 0.004241 | 0.007184 | 0.003329 | 0.00239  | 0.005852 | 0.003973 | 0.050414 | 0.0042   | 0.040988 | 0.065397 | 0.006509 | 0.177702 | 0.018784 | 0.076118 |
| 0.002985 | 2.84E-04 | 0.003397 | 0.00982  | 6.19E-04 | 0.007009 | 0.001419 | 0.004633 | 7.68E-04 | 0.023217 | 0.02133  | 0.002079 | 0.0069   | 0.054946 | 0.025849 |
| 0.00128  | 0.005318 | 0.022627 | 0.007328 | 0.003723 | 0.002804 | 0.003001 | 0.015721 | 0.009728 | 0.011973 | 0.020565 | 0.007712 | 0.004471 | 0.120355 | 0.022983 |
| 0.025303 | 0.009783 | 0.006292 | 0.017841 | 0.007764 | 0.125134 | 0.03343  | 0.00169  | 0.022634 | 0.019422 | 0.017741 | 0.080641 | 0.052842 | 0.02466  | 0.09022  |
| 0.003269 | 4.79E-04 | 0.001252 | 2.21E-04 | 3.12E-04 | 0.001133 | 1.54E-04 | 0.009759 | 3.95E-04 | 0.002729 | 0.038097 | 0.00138  | 0.032982 | 0.066511 | 0.015876 |
| 0.010319 | 0.001616 | 0.002071 | 0.007704 | 0.045538 | 0.001011 | 0.094898 | 0.00136  | 0.002646 | 0.013533 | 0.002225 | 0.038125 | 0.005179 | 0.012025 | 0.002444 |
| 0.001077 | 0.003052 | 2.74E-04 | 1.68E-04 | 0.003673 | 0.001884 | 1.49E-04 | 0.032991 | 0.089052 | 6.96E-04 | 0.036564 | 0.102411 | 7.30E-05 | 0.023872 | 0.140966 |
| 0.002856 | 0.010078 | 0.001906 | 0.005227 | 0.032692 | 0.003931 | 0.00883  | 0.031502 | 0.029336 | 0.085293 | 0.00892  | 0.023839 | 1.94E-04 | 0.008629 | 0.008255 |
| 0.004811 | 0.016739 | 0.030138 | 0.015642 | 0.012613 | 0.011806 | 0.013501 | 0.031627 | 0.030301 | 0.022525 | 0.041877 | 0.023716 | 0.019739 | 0.022681 | 0.040815 |
| 9.46E-04 | 0.003062 | 0.002241 | 5.33E-04 | 0.004832 | 8.94E-04 | 0.002947 | 0.001445 | 0.001412 | 0.004305 | 0.003322 | 7.31E-04 | 0.010013 | 0.002971 | 0.01026  |
| 1.67E-04 | 1.03E-04 | 7.20E-04 | 4.80E-04 | 2.64E-04 | 3.75E-04 | 3.48E-04 | 0.001151 | 9.80E-05 | 1.16E-04 | 0.002212 | 6.20E-04 | 0.002756 | 0.006699 | 0        |
| 0.0018   | 0        | 1.88E-04 | 2.74E-04 | 2.35E-04 | 0.009394 | 1.95E-04 | 0.003426 | 1.04E-04 | 1.97E-04 | 2.34E-04 | 0.004058 | 7.60E-05 | 0.012637 | 3.33E-04 |
| 0        | 0        | 1.83E-04 | 0        | 0        | 0        | 0        | 4.44E-04 | 2.66E-04 | 6.40E-05 | 6.55E-04 | 1.56E-04 | 0.006042 | 0.002955 | 0.001683 |
| 0.001722 | 2.11E-04 | 9.10E-05 | 0        | 4.91E-04 | 8.70E-05 | 4.94E-04 | 0.00093  | 9.90E-05 | 9.24E-04 | 0.00162  | 0.001279 | 0.002737 | 0.001973 | 0.001722 |
| 3.84E-04 | 1.41E-04 | 0        | 1.84E-04 | 2.63E-04 | 0        | 1.93E-04 | 1.14E-04 | 2.94E-04 | 3.19E-04 | 2.16E-04 | 2.49E-04 | 2.17E-04 | 6.62E-04 | 2.08E-04 |
| 5.90E-04 | 2.69E-04 | 1.79E-04 | 3.90E-05 | 1.08E-04 | 8.96E-04 | 1.15E-04 | 2.23E-04 | 9.00E-05 | 1.40E-04 | 0.005801 | 7.70E-05 | 5.89E-04 | 0.00153  | 0.002616 |
| 9.10E-05 | 0        | 0        | 0        | 4.00E-04 | 6.07E-04 | 0        | 0        | 1.82E-04 | 0.001651 | 0.007735 | 5.79E-04 | 0        | 0.004407 | 0.010508 |
| 8.40E-05 | 1.28E-04 | 0        | 3.94E-04 | 3.60E-04 | 0        | 2.99E-04 | 5.42E-04 | 9.40E-05 | 5.92E-04 | 0.001008 | 6.22E-04 | 2.87E-04 | 0.009379 | 2.25E-04 |
| 2.84E-04 | 0        | 0        | 3.60E-05 | 0        | 2.30E-04 | 0        | 0        | 1.01E-04 | 0        | 0        | 7.90E-05 | 0        | 5.30E-05 | 0.001061 |
| 1.83E-04 | 1.79E-04 | 1.79E-04 | 1.62E-04 | 1.17E-04 | 8.10E-05 | 5.10E-05 | 1.12E-04 | 8.62E-04 | 2.13E-04 | 7.77E-04 | 6.89E-04 | 8.82E-04 | 6.69E-04 | 0.001417 |
| 1.94E-04 | 3.36E-04 | 8.94E-04 | 7.60E-04 | 5.20E-04 | 3.57E-04 | 4.61E-04 | 0.003121 | 7.57E-04 | 0.001534 | 0.004293 | 5.56E-04 | 0.00365  | 0.001538 | 0.0046   |
| 0.005584 | 0.016133 | 0.002155 | 0.003887 | 0.016772 | 0.003847 | 0.010365 | 0.026495 | 0.025616 | 0.029007 | 0.007408 | 0.021222 | 2.00E-04 | 0.002271 | 0.00818  |
| 0.001606 | 0.007341 | 0.001608 | 0.003384 | 0.014001 | 0.001886 | 0.00699  | 0.012555 | 0.015212 | 0.030358 | 0.003927 | 0.013376 | 1.87E-04 | 0.003248 | 0.005002 |
| 1.01E-04 | 3.07E-04 | 2.70E-04 | 5.17E-04 | 3.08E-04 | 2.04E-04 | 5.61E-04 | 2.33E-04 | 3.97E-04 | 0.001526 | 0        | 2.63E-04 | 7.70E-05 | 2.13E-04 | 7.39E-04 |
| 2.68E-04 | 3.60E-05 | 4.51E-04 | 0.001142 | 6.20E-05 | 7.70E-05 | 5.30E-05 | 1.07E-04 | 0.004801 | 0.001132 | 2.30E-04 | 0        | 0        | 4.70E-05 | 0.002682 |
| 3.78E-04 | 1.42E-04 | 0        | 0        | 0        | 2.82E-04 | 0        | 1.06E-04 | 0        | 0        | 0        | 1.77E-04 | 1.29E-04 | 3.38E-04 | 0        |
| 1.80E-04 | 3.40E-05 | 8.60E-05 | 4.60E-05 | 0        | 0        | 0        | 0        | 8.80E-05 | 1.43E-04 | 5.52E-04 | 0        | 1.17E-04 | 2.71E-04 | 0        |
| 0        | 0        | 0        | 0        | 0        | 0        | 0        | 0        | 0        | 0        | 2.15E-04 | 0        | 0        | 4.33E-04 | 5.16E-04 |
| 9.20E-05 | 1.47E-04 | 9.30E-05 | 1.70E-04 | 5.60E-05 | 7.90E-05 | 1.98E-04 | 1.08E-04 | 3.89E-04 | 6.50E-05 | 9.92E-04 | 7.30E-05 | 3.29E-04 | 0.004328 | 1.90E-04 |
| 1.93E-04 | 7.60E-05 | 1.80E-04 | 8.50E-05 | 0        | 8.00E-05 | 0        | 0        | 0        | 0        | 0        | 0        | 7.62E-04 | 6.40E-05 | 0        |
| 0        | 5.00E-05 | 1.88E-04 | 0        | 0        | 0        | 0        | 0        | 0        | 0        | 1.07E-04 | 9.90E-05 | 0        | 5.70E-05 | 7.61E-04 |
| 9.60E-05 | 0        | 0        | 0        | 0        | 0        | 0        | 1.23E-04 | 0        | 5.80E-05 | 0        | 0        | 0        | 7.40E-04 | 0.001476 |
| 0        | 0        | 0        | 0        | 6.20E-05 | 0        | 0        | 0        | 1.04E-04 | 7.20E-05 | 0        | 9.20E-05 | 0        | 4.14E-04 | 0        |
| 0        | 0        | 8.90E-05 | 0        | 0        | 0        | 0        | 0        | 0        | 0        | 0        | 0        | 0        | 2.19E-04 | 0        |
| 0.001604 | 0.001325 | 5.41E-04 | 0.004588 | 3.65E-04 | 0.003689 | 5.61E-04 | 0.001843 | 5.57E-04 | 0.002321 | 0.001996 | 0.001434 | 0.001465 | 0.003545 | 0.001234 |
| 0        | 0        | 0        | 0        | 0        | 0        | 0        | 0        | 0        | 0        | 0        | 0        | 0        | 9.00E-05 | 1.08E-04 |
| 0        | 0        | 0        | 0        | 0        | 0        | 0        | 0        | 0        | 0        | 0        | 0        | 0        | 0.002216 | 8.35E-04 |
| 0        | 4.50E-05 | 9.70E-05 | 1.35E-04 | 6.60E-05 | 0        | 3.80E-05 | 7.05E-04 | 0        | 7.78E-04 | 0.001978 | 8.20E-05 | 0.00117  | 0.001033 | 5.51E-04 |
| 0        | 7.80E-05 | 4.69E-04 | 1.71E-04 | 1.74E-04 | 0        | 9.90E-05 | 0.001028 | 0        | 6.40E-05 | 0.001079 | 9.00E-05 | 2.27E-04 | 0.001494 | 2.18E-04 |
| 0        | 1.43E-04 | 9.20E-05 | 0        | 0        | 1.53E-04 | 2.11E-04 | 4.42E-04 | 9.70E-05 | 0        | 0        | 3.04E-04 | 0        | 6.61E-04 | 2.17E-04 |
| 0        | 0        | 0        | 0        | 0        | 0        | 0        | 1.16E-04 | 6.79E-04 | 8.50E-05 | 0        | 2.43E-04 | 0        | 5.30E-05 | 0        |
| 9.20E-05 | 0.001401 | 0        | 8.60E-05 | 1.79E-04 | 8.76E-04 | 0        | 1.13E-04 | 9.60E-05 | 5.95E-04 | 9.77E-04 | 0.001558 | 3.73E-04 | 0.001291 | 1.07E-04 |
| 0        | 0        | 0        | 0        | 0        | 0        | 0        | 0        | 0        | 0        | 1.14E-04 | 0        | 0        | 1.15E-04 | 0        |
| 0        | 0        | 0        | 0        | 0        | 0        | 0        | 0        | 0        | 0        | 0        | 0        | 0        | 0        | 0        |
| 0        | 0        | 0        | 0        | 0        | 7.90E-05 | 0        | 0        | 0        | 0        | 0        | 0        | 0        | 5.00E-05 | 1.01E-04 |
| 0        | 1.01E-04 | 0        | 0        | 0        | 0        | 0        | 0        | 1.90E-04 | 0        | 0        | 7.90E-05 | 0        | 0        | 0        |
| 0        | 0        | 0        | 0        | 0        | 0        | 0        | 0        | 0        | 0        | 0        | 0        | 0        | 5.30E-05 | 0        |
| 0        | 0        | 0        | 0        | 0        | 0        | 0        | 0        | 0        | 0        | 0        | 0        | 0        | 0        | 0        |
| 3.65E-04 | 8.18E-04 | 5.57E-04 | 4.92E-04 | 5.86E-04 | 7.00E-04 | 6.26E-04 | 8.32E-04 | 0.002101 | 9.86E-04 | 0.001963 | 0.002755 | 0.001732 | 0.011056 | 0.005898 |

| SPR39    | SPR02    | SPR06    | SPR13    | SPR15    | SPR09    | SPR30    | SPR25    | SPR32    | SPR26    | SPR35    | SPR07    | SPR18    | SPR31    | SPR24    |
|----------|----------|----------|----------|----------|----------|----------|----------|----------|----------|----------|----------|----------|----------|----------|
| 0.478542 | 0.472957 | 0.458905 | 0.406057 | 0.396706 | 0.318041 | 0.314689 | 0.294751 | 0.234515 | 0.137486 | 0.132625 | 0.08936  | 0.08693  | 0.07992  | 0.071521 |
| 0.355849 | 0.064151 | 0.011801 | 0.181508 | 0.039886 | 0.054715 | 0.014173 | 0.004349 | 0.206424 | 0.052751 | 0.022556 | 0.230216 | 0.115258 | 0.185846 | 0.118059 |
| 0.040135 | 0.081121 | 0.081305 | 0.107341 | 0.07174  | 0.059439 | 0.038173 | 0.006163 | 0.176592 | 0.099395 | 0.05853  | 0.06427  | 0.125651 | 0.312922 | 0.274556 |
| 0.039188 | 0.012101 | 0.009805 | 0.034632 | 0.054849 | 0.04844  | 0.003051 | 0.015151 | 0.167377 | 0.034532 | 0.046664 | 0.147749 | 0.146033 | 0.123599 | 0.030328 |
| 0.001021 | 0.012741 | 0.053342 | 0.00315  | 0.041563 | 0.007892 | 0.17494  | 0.001319 | 0.009984 | 0.004536 | 0.021548 | 0.08519  | 0.040512 | 0.032417 | 0.132164 |
| 0.019752 | 0.084688 | 0.081089 | 0.147379 | 0.073659 | 0.012498 | 0.037329 | 0.005548 | 0.092617 | 0.556703 | 0.207948 | 0.027408 | 0.304193 | 0.004141 | 0.071543 |
| 0.004583 | 0.161792 | 0.041305 | 0.015363 | 0.025551 | 0.418163 | 0.017677 | 0.011424 | 0.026384 | 0.007008 | 0.015421 | 0.092996 | 0.004048 | 0.126398 | 0.023243 |
| 0.004829 | 0.003209 | 0.062138 | 0.010064 | 0.016968 | 0.001954 | 0.038174 | 0.035364 | 0.0077   | 0.005231 | 0.095437 | 0.008343 | 0.009876 | 0.018426 | 0.0812   |
| 4.70E-04 | 0.018761 | 0.01297  | 1.46E-04 | 0.113658 | 0.001123 | 0.024253 | 0.019397 | 0        | 0.009087 | 0.122022 | 0.009888 | 0.015126 | 0        | 0.027462 |
| 0.001401 | 0.018652 | 0.053044 | 0.013236 | 0.077078 | 0.006057 | 0.162582 | 0.254132 | 0.015967 | 0.020451 | 0.159565 | 0.01604  | 0.016394 | 5.68E-04 | 0.066161 |
| 0.007568 | 0.02682  | 0.04551  | 0.025077 | 0.003181 | 0.026843 | 0.035644 | 0.01716  | 0.007141 | 0.01883  | 0.009774 | 0.018127 | 0.005547 | 0.026697 | 0.007009 |
| 0.006718 | 0.001384 | 0.004362 | 0.001537 | 0.012881 | 0.00399  | 0.001747 | 0.003622 | 0.007354 | 0.006276 | 0.010196 | 0.007111 | 0.037156 | 0.008116 | 0.00558  |
| 3.00E-05 | 6.17E-04 | 0.004915 | 2.75E-04 | 0.012412 | 0.002405 | 0.041972 | 0        | 0.00231  | 4.27E-04 | 0.025365 | 0.025325 | 0.003592 | 0.002266 | 0.025358 |
| 2.91E-04 | 0.005734 | 0.002104 | 0.004787 | 0.002062 | 8.28E-04 | 0.002592 | 0.010625 | 1.60E-04 | 0.007359 | 0.003884 | 0.004598 | 0.017588 | 0        | 0.002302 |
| 0.001299 | 8.56E-04 | 4.47E-04 | 0.001405 | 0.019646 | 0.004556 | 2.59E-04 | 5.78E-04 | 0.012192 | 1.14E-04 | 0.006043 | 0.044918 | 0.003441 | 0.009998 | 0.024765 |
| 0.001273 | 0.005505 | 0.016911 | 0.003821 | 2.57E-04 | 0.003552 | 0.004134 | 0.007028 | 0.001346 | 0.00127  | 6.50E-04 | 0.003979 | 3.66E-04 | 0.018099 | 0.001982 |
| 0.001078 | 1.02E-04 | 1.58E-04 | 8.44E-04 | 0.001253 | 0        | 2.61E-04 | 0        | 0.001662 | 6.20E-05 | 0.002711 | 8.66E-04 | 0.00838  | 1.92E-04 | 0.002175 |
| 0.001208 | 4.63E-04 | 0.001509 | 0.008338 | 0.005161 | 2.80E-04 | 4.11E-04 | 4.53E-04 | 0.003611 | 3.63E-04 | 0.003364 | 0.001451 | 0.006766 | 0        | 0.004709 |
| 0.007365 | 0.002992 | 0.001203 | 0.007589 | 0.001252 | 2.85E-04 | 4.61E-04 | 0        | 0.00264  | 0.012005 | 3.30E-05 | 0.003833 | 0.008522 | 0        | 0.001325 |
| 5.96E-04 | 1.74E-04 | 0.002676 | 0        | 0.001459 | 0        | 0.00343  | 0        | 0.002219 | 3.98E-04 | 0.013917 | 7.50E-04 | 0.002074 | 0        | 0.00319  |
| 0.001927 | 2.14E-04 | 0.001058 | 1.42E-04 | 0.001916 | 0.00327  | 0        | 0        | 0.001212 | 5.50E-05 | 6.90E-05 | 0.010575 | 0.001645 | 0.023313 | 1.49E-04 |
| 0.00132  | 3.92E-04 | 0.001028 | 6.86E-04 | 0.001253 | 0.0018   | 8.30E-05 | 0        | 0.004361 | 6.60E-05 | 5.69E-04 | 0.005981 | 0.005117 | 5.65E-04 | 0.002321 |
| 7.78E-04 | 0.002062 | 0.004931 | 0.002115 | 5.82E-04 | 0.006323 | 0.003368 | 1.44E-04 | 0.001518 | 0.002447 | 6.37E-04 | 0.002409 | 0.002644 | 0.013749 | 0.003396 |
| 0.001249 | 0.005912 | 0.008749 | 0.009026 | 0.001739 | 0.003365 | 0.020825 | 0.057782 | 2.56E-04 | 0.007841 | 0.006178 | 8.92E-04 | 6.07E-04 | 0        | 3.09E-04 |
| 0.002376 | 0.00897  | 0.014354 | 0.005342 | 0.005624 | 0.003125 | 0.023165 | 0.030749 | 0.002363 | 0.00346  | 0.008549 | 8.40E-04 | 0.001334 | 1.90E-04 | 8.15E-04 |
| 0.001657 | 9.02E-04 | 0.001177 | 0.001856 | 0.004576 | 0.001274 | 7.60E-05 | 4.36E-04 | 0.001064 | 0.002899 | 0.003402 | 0.004322 | 0.003325 | 0.001689 | 0.004434 |
| 9.51E-04 | 9.70E-04 | 7.25E-04 | 0.001024 | 5.12E-04 | 8.26E-04 | 1.48E-04 | 9.00E-04 | 0.001834 | 0.003102 | 8.25E-04 | 0.00622  | 0.004858 | 0.001497 | 6.21E-04 |
| 0        | 0        | 0.001164 | 7.12E-04 | 3.31E-04 | 0.00157  | 1.73E-04 | 0.138287 | 0.00137  | 0        | 0.002937 | 0.002053 | 0        | 0        | 2.47E-04 |
| 7.50E-05 | 6.20E-05 | 3.05E-04 | 5.64E-04 | 6.51E-04 | 5.80E-04 | 8.50E-05 | 1.42E-04 | 3.81E-04 | 0        | 2.55E-04 | 0.002639 | 6.54E-04 | 0        | 6.75E-04 |
| 0.001435 | 5.80E-05 | 2.96E-04 | 0        | 7.84E-04 | 0        | 8.10E-05 | 0        | 7.25E-04 | 0        | 0        | 0.004787 | 0.00142  | 0.003591 | 0        |
| 0        | 1.80E-04 | 0.00252  | 0        | 3.25E-04 | 7.21E-04 | 0.016655 | 0        | 0        | 0        | 6.05E-04 | 0.002645 | 3.36E-04 | 0.001669 | 0.002387 |
| 0        | 1.12E-04 | 1.53E-04 | 2.68E-04 | 0.00131  | 4.34E-04 | 0        | 1.43E-04 | 0.001522 | 6.10E-05 | 6.70E-05 | 0.01963  | 8.50E-05 | 7.44E-04 | 0.003382 |
| 0.00231  | 0        | 2.99E-04 | 0        | 0        | 0        | 0        | 0        | 6.37E-04 | 0        | 0        | 0.003268 | 7.40E-04 | 0        | 2.10E-05 |
| 0.004985 | 3.39E-04 | 2.96E-04 | 1.46E-04 | 0.001844 | 5.62E-04 | 0        | 4.49E-04 | 4.04E-04 | 3.18E-04 | 0.001405 | 0.011251 | 0.004516 | 0        | 1.94E-04 |
| 8.58E-04 | 1.26E-04 | 0        | 0        | 2.18E-04 | 0        | 4.36E-04 | 0        | 4.30E-05 | 0        | 0        | 7.60E-05 | 6.10E-05 | 1.87E-04 | 1.00E-04 |
| 0        | 0        | 0        | 0        | 0        | 0        | 0        | 0        | 1.39E-04 | 0        | 0        | 0.004355 | 5.96E-04 | 0        | 0        |
| 0.002568 | 9.60E-04 | 0.004853 | 0.001747 | 2.07E-04 | 0.001247 | 1.87E-04 | 0.02132  | 5.45E-04 | 7.27E-04 | 1.10E-04 | 0.001394 | 3.07E-04 | 1.89E-04 | 4.47E-04 |
| 0        | 0        | 1.55E-04 | 2.99E-04 | 0        | 1.41E-04 | 0        | 0.008565 | 0        | 0        | 0        | 1.46E-04 | 0        | 0        | 2.22E-04 |
| 0        | 0        | 0        | 0.001283 | 1.06E-04 | 0        | 0        | 0        | 0        | 0        | 7.00E-05 | 0.004674 | 0        | 0        | 3.16E-04 |
| 8.20E-05 | 3.88E-04 | 0.001946 | 1.40E-04 | 1.23E-04 | 2.92E-04 | 0.001519 | 0        | 4.23E-04 | 3.47E-04 | 9.88E-04 | 2.12E-04 | 1.83E-04 | 1.88E-04 | 2.17E-04 |
| 3.30E-05 | 1.73E-04 | 0.001356 | 0        | 2.70E-05 | 1.55E-04 | 0.007788 | 0        | 3.90E-05 | 0        | 4.06E-04 | 3.39E-04 | 1.74E-04 | 9.45E-04 | 4.82E-04 |
| 3.60E-05 | 0.001305 | 0.001059 | 1.40E-04 | 4.84E-04 | 0        | 8.60E-05 | 0        | 0        | 7.50E-04 | 0.005644 | 6.48E-04 | 3.32E-04 | 0        | 2.10E-05 |
| 6.63E-04 | 0        | 0        | 0        | 0.002014 | 1.37E-04 | 0        | 0        | 0        | 7.10E-05 | 0.003721 | 0.001894 | 0.007612 | 0        | 2.01E-04 |
| 0        | 3.01E-04 | 0.002694 | 2.69E-04 | 3.50E-05 | 0.001395 | 2.53E-04 | 0.051225 | 2.61E-04 | 0        | 1.44E-04 | 1.52E-04 | 0        | 0        | 0        |
| 0        | 0        | 0        | 0        | 0        | 0        | 0        | 0        | 0        | 0        | 3.30E-05 | 2.17E-04 | 0        | 0        | 7.00E-04 |
| 0        | 0        | 1.50E-04 | 0        | 0        | 0        | 0        | 0        | 0        | 5.10E-05 | 0        | 0        | 0        | 0        | 0        |
| 3.70E-05 | 0        | 0        | 0        | 3.00E-05 | 1.39E-04 | 0        | 0        | 1.90E-04 | 0        | 2.50E-05 | 0.011547 | 0        | 1.86E-04 | 5.30E-05 |
| 1.30E-04 | 4.80E-05 | 0        | 1.45E-04 | 0        | 0        | 0        | 0        | 0        | 0        | 7.10E-05 | 1.39E-04 | 6.00E-05 | 0        | 0        |
| 0        | 0        | 0        | 0        | 3.90E-05 | 0        | 0        | 0        | 0        | 0        | 0        | 0        | 0        | 0        | 0        |
| 0        | 0        | 0        | 0        | 0        | 0        | 0        | 0        | 0        | 0        | 0        | 0        | 0        | 0        | 0        |
| 0.003334 | 0.001706 | 0.005233 | 0.001547 | 0.004048 | 0.001583 | 0.00912  | 0.002794 | 0.002518 | 0.003521 | 0.005037 | 0.014277 | 0.005941 | 0.001693 | 0.003658 |

| SPR12    | SPR37    | SPR29    | SPR33    | SPR04    |
|----------|----------|----------|----------|----------|
| 0.066354 | 0.04812  | 0.044803 | 0.040299 | 0.014568 |
| 0.282845 | 0.071848 | 0.130795 | 0.003032 | 0.020672 |
| 0.122891 | 0.464687 | 0.280724 | 0.01529  | 0.253012 |
| 0.097807 | 0.022785 | 0.144984 | 0.012172 | 0.036144 |
| 0.004993 | 0.039588 | 0.082002 | 0.097328 | 0.024586 |
| 0.113825 | 0.066781 | 0.030592 | 0.13461  | 0.002696 |
| 0.021756 | 0.097551 | 0.05595  | 3.10E-05 | 0.47385  |
| 0.001766 | 0.035961 | 0.042725 | 0.143556 | 0.028057 |
| 0.002423 | 0.006784 | 0.007786 | 0.011577 | 7.01E-04 |
| 0.002915 | 0.005254 | 0.001978 | 0.476749 | 8.73E-04 |
| 0.002581 | 0.026104 | 0.004183 | 0.00544  | 0.025612 |
| 0.079172 | 0.009378 | 0.021565 | 0.006417 | 0.005598 |
| 8.46E-04 | 0.004529 | 0.019693 | 0.015632 | 0.001066 |
| 0.023185 | 0        | 0.002724 | 0.012466 | 4.13E-04 |
| 0.003416 | 4.20E-04 | 0.061818 | 3.00E-05 | 0.002189 |
| 3.40E-05 | 0.01781  | 0.003096 | 0        | 0.069464 |
| 0.002106 | 0.001247 | 6.37E-04 | 6.13E-04 | 8.70E-05 |
| 0.021481 | 0.005062 | 0.002427 | 0.001466 | 0.001132 |
| 0.012761 | 0.005802 | 9.47E-04 | 0        | 0.002831 |
| 5.25E-04 | 0.00601  | 2.27E-04 | 5.03E-04 | 2.02E-04 |
| 2.30E-05 | 0.008569 | 0.029303 | 0        | 0.01208  |
| 0.00307  | 0.003694 | 0.002022 | 3.40E-05 | 0.001264 |
| 0.001528 | 0.024376 | 0.005004 | 5.97E-04 | 0.011615 |
| 0        | 2.59E-04 | 1.20E-05 | 0.00497  | 1.01E-04 |
| 2.83E-04 | 5.54E-04 | 1.57E-04 | 0.010049 | 1.08E-04 |
| 0.002415 | 0.011841 | 0.005899 | 0        | 0.001869 |
| 0.007168 | 8.18E-04 | 0.001417 | 1.34E-04 | 0        |
| 4.56E-04 | 1.51E-04 | 2.98E-04 | 1.48E-04 | 1.03E-04 |
| 0.037925 | 2.84E-04 | 0.001456 | 1.84E-04 | 7.92E-04 |
| 0.03973  | 0        | 0.002056 | 0        | 6.01E-04 |
| 2.90E-05 | 0.002035 | 0.001902 | 9.84E-04 | 4.78E-04 |
| 0.002695 | 5.69E-04 | 0.005398 | 0        | 0.002502 |
| 0.018156 | 1.31E-04 | 0        | 5.30E-05 | 5.89E-04 |
| 0.004918 | 0        | 1.16E-04 | 2.34E-04 | 0        |
| 1.36E-04 | 0        | 5.50E-05 | 1.04E-04 | 9.30E-05 |
| 3.87E-04 | 5.44E-04 | 1.40E-05 | 0        | 0        |
| 1.33E-04 | 5.59E-04 | 2.30E-05 | 4.95E-04 | 0        |
| 5.60E-05 | 1.51E-04 | 4.10E-05 | 0        | 9.00E-05 |
| 0        | 0        | 1.30E-05 | 0        | 0        |
| 3.40E-05 | 0.002547 | 2.73E-04 | 5.70E-05 | 2.99E-04 |
| 2.80E-05 | 0.001568 | 4.31E-04 | 5.02E-04 | 7.88E-04 |
| 0        | 0        | 5.89E-04 | 0        | 9.60E-05 |
| 3.22E-04 | 0        | 7.43E-04 | 0        | 1.00E-04 |
| 3.10E-05 | 0        | 0        | 3.30E-05 | 0        |
| 0        | 0        | 1.15E-04 | 0        | 0        |
| 0        | 0        | 0        | 0        | 0        |
| 0        | 0.001152 | 7.30E-05 | 0        | 3.12E-04 |
| 1.22E-04 | 1.40E-04 | 0        | 2.80E-05 | 0        |
| 7.00E-05 | 0        | 0        | 0        | 0        |
| 0        | 0        | 0        | 0        | 0        |
| 0.016603 | 0.004337 | 0.002934 | 0.004183 | 0.002367 |

**Table S16. The detailed values of oral microbial diversity index and observed OTUs among CP (n=72), CPR (n=22), and HC (n=150) groups.**

| sample | reads  | label | ace    | chao   | shannon | simpson  | coverage | observed<br>_otus |
|--------|--------|-------|--------|--------|---------|----------|----------|-------------------|
| CP01   | 27880  | 0.97  | 344.61 | 313.37 | 2.56187 | 0.181486 | 0.997561 | 229               |
| CP53   | 108876 | 0.97  | 476    | 476    | 3.35505 | 0.070778 | 1        | 476               |
| CP52   | 56632  | 0.97  | 259    | 259    | 3.14236 | 0.091595 | 1        | 259               |
| CP51   | 172772 | 0.97  | 347    | 347    | 2.9986  | 0.130529 | 1        | 347               |
| CP50   | 28485  | 0.97  | 318.68 | 291.77 | 2.58593 | 0.148046 | 0.997999 | 169               |
| CP49   | 90016  | 0.97  | 403    | 403    | 3.05928 | 0.118804 | 1        | 403               |
| CP48   | 19696  | 0.97  | 425.57 | 413.31 | 3.05539 | 0.169012 | 0.995278 | 326               |
| CP54   | 6995   | 0.97  | 440.71 | 362.03 | 2.68971 | 0.169547 | 0.986133 | 229               |
| CP47   | 22461  | 0.97  | 542.74 | 488.36 | 3.18543 | 0.099601 | 0.995147 | 310               |
| CP45   | 38617  | 0.97  | 585.02 | 609.63 | 3.41768 | 0.094394 | 0.996789 | 454               |
| CP44   | 7544   | 0.97  | 325.73 | 314.25 | 3.31756 | 0.082001 | 0.989926 | 243               |
| CP43   | 7767   | 0.97  | 333.54 | 336.87 | 3.63654 | 0.059001 | 0.989958 | 240               |
| CP42   | 8003   | 0.97  | 575.7  | 512.76 | 3.87615 | 0.056113 | 0.985131 | 328               |
| CP40   | 15703  | 0.97  | 435.78 | 371.53 | 3.21601 | 0.106495 | 0.994651 | 269               |
| CP39   | 12474  | 0.97  | 532.02 | 454.12 | 3.80801 | 0.070511 | 0.991502 | 345               |
| CP46   | 31642  | 0.97  | 601.08 | 511.17 | 2.54972 | 0.260334 | 0.995986 | 363               |
| CP55   | 14594  | 0.97  | 595.98 | 601.27 | 3.76935 | 0.077171 | 0.990613 | 446               |
| CP56   | 8041   | 0.97  | 476.22 | 413.69 | 2.99994 | 0.131075 | 0.986818 | 271               |
| CP57   | 7843   | 0.97  | 524.87 | 420.98 | 3.41304 | 0.07587  | 0.985847 | 279               |
| CP72   | 39452  | 0.97  | 634.1  | 540.77 | 3.1591  | 0.101487 | 0.99673  | 385               |
| CP71   | 48811  | 0.97  | 523.97 | 450.13 | 2.89609 | 0.135853 | 0.997951 | 347               |
| CP70   | 67321  | 0.97  | 483.02 | 376.69 | 2.12728 | 0.300125 | 0.998619 | 267               |
| CP69   | 10808  | 0.97  | 330.89 | 326.06 | 2.82248 | 0.179229 | 0.992876 | 240               |
| CP68   | 84088  | 0.97  | 290    | 290    | 2.87988 | 0.120567 | 1        | 290               |
| CP67   | 111884 | 0.97  | 267    | 267    | 3.31184 | 0.065666 | 1        | 267               |
| CP66   | 59690  | 0.97  | 335    | 335    | 2.41537 | 0.235417 | 1        | 335               |
| CP65   | 34625  | 0.97  | 295.91 | 292.17 | 1.42159 | 0.370534 | 0.997863 | 215               |
| CP64   | 63536  | 0.97  | 415    | 415    | 3.7169  | 0.048155 | 1        | 415               |
| CP63   | 56018  | 0.97  | 248    | 248    | 2.97606 | 0.120418 | 1        | 248               |
| CP62   | 42534  | 0.97  | 376    | 376    | 3.70466 | 0.048996 | 1        | 376               |
| CP61   | 61730  | 0.97  | 476    | 476    | 3.63229 | 0.060135 | 1        | 476               |
| CP60   | 16660  | 0.97  | 352.93 | 303.77 | 2.51271 | 0.171691 | 0.995618 | 219               |
| CP59   | 69868  | 0.97  | 310    | 310    | 2.28598 | 0.238173 | 1        | 310               |
| CP58   | 8837   | 0.97  | 462.62 | 399.58 | 1.52969 | 0.551645 | 0.988797 | 213               |
| CP38   | 13929  | 0.97  | 206.65 | 183.19 | 2.77571 | 0.160166 | 0.997487 | 146               |
| CP37   | 23414  | 0.97  | 231.53 | 242.11 | 3.04597 | 0.098941 | 0.998078 | 190               |
| CP41   | 12460  | 0.97  | 212.52 | 144.33 | 1.71702 | 0.379523 | 0.99679  | 101               |
| CP35   | 103978 | 0.97  | 178    | 178    | 2.31959 | 0.156498 | 1        | 178               |
| CP16   | 13566  | 0.97  | 521.64 | 529.52 | 3.86747 | 0.05908  | 0.991449 | 406               |
| CP15   | 7532   | 0.97  | 588.98 | 483.91 | 3.84429 | 0.057866 | 0.984068 | 332               |
| CP36   | 20585  | 0.97  | 635.86 | 523.04 | 3.59288 | 0.072153 | 0.994073 | 366               |
| CP13   | 16008  | 0.97  | 397.68 | 383.02 | 3.01442 | 0.121979 | 0.994128 | 288               |
| CP12   | 16787  | 0.97  | 496.33 | 521.25 | 2.87335 | 0.144908 | 0.992792 | 370               |
| CP11   | 28852  | 0.97  | 553.46 | 596    | 3.90586 | 0.04498  | 0.995945 | 422               |
| CP10   | 9906   | 0.97  | 497.28 | 431.4  | 3.20043 | 0.095125 | 0.989098 | 303               |
| CP09   | 29229  | 0.97  | 551.06 | 485.77 | 3.63711 | 0.068305 | 0.996476 | 374               |
| CP08   | 99290  | 0.97  | 195    | 195    | 2.55123 | 0.128344 | 1        | 195               |
| CP07   | 6796   | 0.97  | 387.41 | 379.13 | 3.39357 | 0.099144 | 0.986168 | 282               |
| CP06   | 115734 | 0.97  | 413    | 413    | 3.43957 | 0.066248 | 1        | 413               |
| CP05   | 15122  | 0.97  | 391.05 | 447.8  | 3.43789 | 0.105346 | 0.994379 | 305               |
| CP04   | 19175  | 0.97  | 162.11 | 127.2  | 1.1043  | 0.603845 | 0.998279 | 92                |
| CP03   | 116888 | 0.97  | 431    | 431    | 3.79182 | 0.051933 | 1        | 431               |
| CP02   | 13110  | 0.97  | 325.78 | 337.94 | 2.85817 | 0.172839 | 0.994203 | 246               |
| CP17   | 15173  | 0.97  | 528.67 | 574.13 | 2.8917  | 0.221758 | 0.9913   | 382               |
| CP18   | 17946  | 0.97  | 524.64 | 524.05 | 3.56953 | 0.082644 | 0.993425 | 409               |

|       |        |      |        |        |         |          |          |     |
|-------|--------|------|--------|--------|---------|----------|----------|-----|
| CP14  | 52168  | 0.97 | 460    | 460    | 3.76775 | 0.060847 | 1        | 460 |
| CP20  | 48012  | 0.97 | 350    | 350    | 3.02218 | 0.133807 | 1        | 350 |
| CP34  | 32646  | 0.97 | 292.84 | 279.33 | 2.06142 | 0.251023 | 0.998162 | 181 |
| CP33  | 22755  | 0.97 | 438.1  | 394.11 | 3.0576  | 0.113187 | 0.996177 | 293 |
| CP19  | 11464  | 0.97 | 606.44 | 484.48 | 2.53991 | 0.217973 | 0.988747 | 305 |
| CP31  | 14166  | 0.97 | 614.87 | 521.46 | 3.86911 | 0.048804 | 0.990823 | 384 |
| CP30  | 106960 | 0.97 | 281    | 281    | 3.2996  | 0.079719 | 1        | 281 |
| CP29  | 18150  | 0.97 | 257.32 | 263.6  | 2.22409 | 0.238    | 0.996915 | 202 |
| CP28  | 12807  | 0.97 | 520.39 | 384.97 | 2.49137 | 0.207541 | 0.992582 | 231 |
| CP32  | 6810   | 0.97 | 529.72 | 478.08 | 3.5962  | 0.063671 | 0.983113 | 296 |
| CP26  | 53996  | 0.97 | 316    | 316    | 3.29688 | 0.09276  | 1        | 316 |
| CP25  | 12798  | 0.97 | 444.23 | 449.44 | 3.16833 | 0.170557 | 0.991952 | 340 |
| CP24  | 37136  | 0.97 | 710.08 | 639    | 3.12746 | 0.112952 | 0.996203 | 404 |
| CP23  | 36643  | 0.97 | 292.75 | 218.5  | 1.50191 | 0.294941 | 0.998581 | 108 |
| CP22  | 12601  | 0.97 | 697.39 | 602.44 | 4.25549 | 0.035215 | 0.98889  | 448 |
| CP21  | 16015  | 0.97 | 543.53 | 458.28 | 2.34212 | 0.205742 | 0.992757 | 273 |
| CP27  | 16155  | 0.97 | 783.69 | 665.25 | 3.98165 | 0.045901 | 0.990158 | 472 |
| CPR15 | 28528  | 0.97 | 464.14 | 441.18 | 3.42705 | 0.087113 | 0.99646  | 351 |
| CPR16 | 18952  | 0.97 | 385.98 | 371.47 | 2.99803 | 0.15365  | 0.995568 | 294 |
| CPR17 | 51229  | 0.97 | 480.62 | 496.79 | 3.56614 | 0.059146 | 0.998009 | 377 |
| CPR18 | 31304  | 0.97 | 518.46 | 438.16 | 2.95884 | 0.130704 | 0.99671  | 316 |
| CPR21 | 31473  | 0.97 | 415.68 | 446.97 | 3.18697 | 0.091429 | 0.997109 | 319 |
| CPR20 | 31771  | 0.97 | 373.41 | 397.52 | 2.90256 | 0.137584 | 0.997451 | 293 |
| CPR22 | 27100  | 0.97 | 384.27 | 382.41 | 2.41373 | 0.261839 | 0.996716 | 282 |
| CPR14 | 31585  | 0.97 | 534.25 | 545.06 | 3.60565 | 0.062722 | 0.996359 | 419 |
| CPR19 | 34195  | 0.97 | 492.27 | 438.83 | 3.34196 | 0.070192 | 0.997134 | 320 |
| CPR13 | 27690  | 0.97 | 385.97 | 408.9  | 2.78024 | 0.184876 | 0.996894 | 291 |
| CPR12 | 24792  | 0.97 | 391.89 | 362.78 | 2.838   | 0.135963 | 0.996975 | 260 |
| CPR11 | 27206  | 0.97 | 353.33 | 387.54 | 2.15413 | 0.302397 | 0.997059 | 266 |
| CPR01 | 74180  | 0.97 | 211    | 211    | 2.06827 | 0.330062 | 1        | 211 |
| CPR02 | 33634  | 0.97 | 397.78 | 434.9  | 3.06622 | 0.122136 | 0.997443 | 317 |
| CPR04 | 22207  | 0.97 | 455.38 | 436.22 | 3.29977 | 0.101638 | 0.995542 | 354 |
| CPR05 | 52793  | 0.97 | 494.71 | 510.33 | 3.50895 | 0.062528 | 0.998144 | 407 |
| CPR03 | 37835  | 0.97 | 332.84 | 325.76 | 2.64492 | 0.157889 | 0.998229 | 266 |
| CPR07 | 27067  | 0.97 | 230.19 | 229.84 | 2.77359 | 0.140283 | 0.998374 | 192 |
| CPR08 | 22474  | 0.97 | 404.95 | 390.21 | 3.34093 | 0.090146 | 0.996307 | 326 |
| CPR09 | 27989  | 0.97 | 357.27 | 347.07 | 2.83449 | 0.100647 | 0.996963 | 260 |
| CPR10 | 19320  | 0.97 | 445.42 | 456.77 | 3.32771 | 0.081834 | 0.994772 | 342 |
| CPR06 | 17873  | 0.97 | 313.22 | 324.03 | 3.45465 | 0.061857 | 0.996531 | 261 |
| HC101 | 75060  | 0.97 | 605    | 605    | 3.47682 | 0.076938 | 1        | 605 |
| HC096 | 36192  | 0.97 | 588.36 | 641.96 | 3.4927  | 0.069225 | 0.996353 | 454 |
| HC097 | 42128  | 0.97 | 793.82 | 676.04 | 3.66752 | 0.060927 | 0.996273 | 517 |
| HC098 | 27077  | 0.97 | 555.35 | 572.13 | 2.65444 | 0.191627 | 0.995051 | 404 |
| HC099 | 25347  | 0.97 | 657.09 | 646.21 | 3.691   | 0.065456 | 0.994082 | 491 |
| HC100 | 26606  | 0.97 | 829.12 | 780.51 | 3.92574 | 0.040673 | 0.993498 | 510 |
| HC102 | 16902  | 0.97 | 658.22 | 694.6  | 3.93238 | 0.051247 | 0.990652 | 477 |
| HC076 | 38456  | 0.97 | 503.53 | 512.63 | 2.19681 | 0.328185 | 0.996906 | 360 |
| HC104 | 22999  | 0.97 | 733.97 | 640.44 | 3.29171 | 0.111289 | 0.993565 | 439 |
| HC105 | 16184  | 0.97 | 752.86 | 644.84 | 4.05814 | 0.048322 | 0.990793 | 467 |
| HC106 | 32968  | 0.97 | 875.98 | 768.44 | 3.75832 | 0.07314  | 0.994692 | 554 |
| HC107 | 21724  | 0.97 | 774.7  | 655.12 | 4.02267 | 0.036532 | 0.992727 | 470 |
| HC095 | 46027  | 0.97 | 719.15 | 708.61 | 3.77968 | 0.051727 | 0.996567 | 541 |
| HC108 | 43590  | 0.97 | 493.92 | 539.24 | 3.59357 | 0.057279 | 0.997637 | 401 |
| HC109 | 21480  | 0.97 | 692.21 | 644.31 | 3.09088 | 0.115763 | 0.992877 | 407 |
| HC103 | 20480  | 0.97 | 430.28 | 386.63 | 3.33926 | 0.077086 | 0.995703 | 267 |
| HC094 | 98172  | 0.97 | 447    | 447    | 3.49823 | 0.064293 | 1        | 447 |
| HC089 | 40437  | 0.97 | 664.5  | 715    | 3.56271 | 0.068609 | 0.996192 | 484 |
| HC092 | 42683  | 0.97 | 800.05 | 767.19 | 3.4406  | 0.106479 | 0.996134 | 507 |

|       |       |      |        |        |         |          |          |     |
|-------|-------|------|--------|--------|---------|----------|----------|-----|
| HC077 | 26775 | 0.97 | 612.32 | 512.05 | 2.32461 | 0.249868 | 0.995107 | 360 |
| HC078 | 20167 | 0.97 | 618.64 | 542.5  | 3.50319 | 0.068525 | 0.993752 | 355 |
| HC079 | 16345 | 0.97 | 691.13 | 621.02 | 3.6299  | 0.063443 | 0.991068 | 425 |
| HC080 | 30229 | 0.97 | 643.49 | 581.64 | 3.28992 | 0.093933 | 0.995733 | 394 |
| HC081 | 17769 | 0.97 | 739.95 | 635.55 | 4.20067 | 0.030668 | 0.991783 | 428 |
| HC082 | 42006 | 0.97 | 289.16 | 273.83 | 2.38855 | 0.264299 | 0.998786 | 203 |
| HC083 | 38740 | 0.97 | 687.52 | 705.44 | 3.28896 | 0.127865 | 0.995999 | 516 |
| HC084 | 30448 | 0.97 | 700.55 | 584.56 | 3.77014 | 0.048118 | 0.995435 | 422 |
| HC085 | 40535 | 0.97 | 728.61 | 672.25 | 3.84811 | 0.038992 | 0.996349 | 467 |
| HC086 | 29743 | 0.97 | 565.11 | 564.8  | 3.27842 | 0.135329 | 0.995898 | 433 |
| HC087 | 36441 | 0.97 | 588.99 | 501.36 | 2.88571 | 0.127263 | 0.996872 | 348 |
| HC088 | 36922 | 0.97 | 659.69 | 646.94 | 3.92903 | 0.039071 | 0.995883 | 483 |
| HC110 | 38647 | 0.97 | 395.8  | 414.79 | 3.16418 | 0.091055 | 0.997671 | 297 |
| HC090 | 57888 | 0.97 | 723.7  | 719.54 | 3.58779 | 0.079642 | 0.997392 | 553 |
| HC091 | 37313 | 0.97 | 948.18 | 820.57 | 3.25819 | 0.122278 | 0.994908 | 511 |
| HC093 | 37151 | 0.97 | 665.1  | 553.6  | 3.61506 | 0.056075 | 0.996528 | 416 |
| HC111 | 24572 | 0.97 | 634.7  | 647.06 | 4.07954 | 0.039448 | 0.994465 | 499 |
| HC117 | 31562 | 0.97 | 746.15 | 690.11 | 4.11869 | 0.037471 | 0.995343 | 495 |
| HC113 | 41127 | 0.97 | 653.63 | 576.69 | 3.51461 | 0.056922 | 0.996839 | 402 |
| HC134 | 44745 | 0.97 | 628.01 | 643.55 | 3.69987 | 0.050225 | 0.996916 | 486 |
| HC135 | 48532 | 0.97 | 579.49 | 564.38 | 3.57485 | 0.056863 | 0.997548 | 458 |
| HC136 | 42272 | 0.97 | 657.65 | 685.78 | 3.634   | 0.058056 | 0.996499 | 488 |
| HC137 | 28242 | 0.97 | 717.73 | 654.56 | 3.40599 | 0.098131 | 0.994795 | 431 |
| HC138 | 31522 | 0.97 | 787.96 | 710.61 | 3.34309 | 0.100455 | 0.994956 | 478 |
| HC139 | 28625 | 0.97 | 458.18 | 472.17 | 3.00293 | 0.120364 | 0.996472 | 349 |
| HC140 | 41488 | 0.97 | 864.06 | 782.9  | 3.39485 | 0.092477 | 0.995806 | 544 |
| HC141 | 27041 | 0.97 | 480.88 | 407.22 | 2.82462 | 0.134195 | 0.99645  | 296 |
| HC142 | 27648 | 0.97 | 726.7  | 774.97 | 3.86163 | 0.056794 | 0.993924 | 545 |
| HC143 | 47328 | 0.97 | 537.67 | 560.49 | 3.60808 | 0.056014 | 0.997528 | 422 |
| HC144 | 87790 | 0.97 | 593    | 593    | 3.73782 | 0.065932 | 1        | 593 |
| HC145 | 18813 | 0.97 | 715.67 | 629.94 | 3.72638 | 0.059531 | 0.992027 | 423 |
| HC146 | 49947 | 0.97 | 464.62 | 438.34 | 2.69077 | 0.144981 | 0.998158 | 294 |
| HC147 | 49095 | 0.97 | 615.73 | 647.17 | 3.09706 | 0.125529 | 0.997413 | 499 |
| HC148 | 33672 | 0.97 | 382.02 | 371.38 | 2.68467 | 0.129335 | 0.997446 | 280 |
| HC133 | 36421 | 0.97 | 610.42 | 500.96 | 3.18046 | 0.094276 | 0.996815 | 362 |
| HC112 | 27647 | 0.97 | 579.34 | 509    | 2.86565 | 0.136652 | 0.995732 | 332 |
| HC132 | 25250 | 0.97 | 440.75 | 374.53 | 3.22872 | 0.079617 | 0.996554 | 281 |
| HC130 | 25429 | 0.97 | 681.56 | 582.08 | 3.36926 | 0.074432 | 0.994376 | 383 |
| HC114 | 26858 | 0.97 | 652.48 | 668.66 | 3.58187 | 0.087776 | 0.994378 | 483 |
| HC115 | 39842 | 0.97 | 763.68 | 666.67 | 3.90935 | 0.044209 | 0.99631  | 499 |
| HC116 | 36808 | 0.97 | 559.07 | 532.51 | 3.35408 | 0.076873 | 0.996686 | 430 |
| HC118 | 18200 | 0.97 | 902.75 | 800.36 | 4.12779 | 0.060388 | 0.98967  | 575 |
| HC119 | 75802 | 0.97 | 478    | 478    | 2.79294 | 0.178732 | 1        | 478 |
| HC120 | 22418 | 0.97 | 592.77 | 614.77 | 3.28159 | 0.100773 | 0.993666 | 436 |
| HC121 | 53173 | 0.97 | 611.08 | 641.25 | 2.77385 | 0.189821 | 0.997311 | 446 |
| HC122 | 42420 | 0.97 | 876.22 | 791.63 | 3.73038 | 0.063887 | 0.995851 | 551 |
| HC123 | 43259 | 0.97 | 614.2  | 634.66 | 3.08463 | 0.127325 | 0.996879 | 464 |
| HC124 | 33647 | 0.97 | 781.28 | 684.19 | 3.5727  | 0.083538 | 0.995393 | 459 |
| HC125 | 27994 | 0.97 | 611.15 | 589.69 | 1.98881 | 0.390123 | 0.995285 | 368 |
| HC126 | 25322 | 0.97 | 713.98 | 580.51 | 3.08355 | 0.136575 | 0.994471 | 421 |
| HC127 | 29054 | 0.97 | 637.18 | 583.2  | 3.56537 | 0.070673 | 0.995663 | 412 |
| HC128 | 24027 | 0.97 | 601.97 | 594.71 | 2.9395  | 0.160551 | 0.993965 | 429 |
| HC129 | 54114 | 0.97 | 603    | 603    | 3.9302  | 0.046048 | 1        | 603 |
| HC131 | 36212 | 0.97 | 667.74 | 662.32 | 3.7878  | 0.053668 | 0.995858 | 493 |
| HC075 | 37760 | 0.97 | 718.65 | 700.18 | 3.99695 | 0.039512 | 0.995789 | 547 |
| HC028 | 38041 | 0.97 | 501.25 | 548.16 | 2.76148 | 0.195329 | 0.996977 | 371 |
| HC073 | 38144 | 0.97 | 547.46 | 584.73 | 3.56013 | 0.066995 | 0.996775 | 418 |
| HC020 | 35482 | 0.97 | 458.8  | 450.45 | 3.25929 | 0.084834 | 0.997153 | 343 |

|       |        |      |        |        |         |          |          |     |
|-------|--------|------|--------|--------|---------|----------|----------|-----|
| HC021 | 30432  | 0.97 | 668.48 | 693.51 | 3.52997 | 0.093011 | 0.995005 | 499 |
| HC022 | 28586  | 0.97 | 668.85 | 581.88 | 3.79773 | 0.049337 | 0.995487 | 420 |
| HC023 | 28579  | 0.97 | 736.38 | 617.41 | 3.34696 | 0.093102 | 0.994961 | 466 |
| HC024 | 61446  | 0.97 | 458    | 458    | 3.23436 | 0.125581 | 1        | 458 |
| HC025 | 33465  | 0.97 | 672.8  | 617    | 3.28135 | 0.096067 | 0.995936 | 413 |
| HC026 | 17811  | 0.97 | 464.53 | 467.71 | 2.91746 | 0.154958 | 0.993768 | 348 |
| HC027 | 19807  | 0.97 | 552.79 | 543.47 | 3.73877 | 0.053931 | 0.993639 | 410 |
| HC149 | 30315  | 0.97 | 704.42 | 611.84 | 2.59528 | 0.21645  | 0.995118 | 421 |
| HC029 | 37217  | 0.97 | 931.21 | 830.83 | 3.81464 | 0.067974 | 0.994975 | 602 |
| HC030 | 46199  | 0.97 | 612.23 | 615.8  | 3.53534 | 0.064735 | 0.996948 | 454 |
| HC031 | 38126  | 0.97 | 609.01 | 612.15 | 3.558   | 0.06817  | 0.996721 | 503 |
| HC032 | 43463  | 0.97 | 745.72 | 641    | 3.86539 | 0.043202 | 0.996687 | 485 |
| HC033 | 53735  | 0.97 | 666.45 | 680.02 | 3.42291 | 0.076748 | 0.997264 | 495 |
| HC034 | 34796  | 0.97 | 516.17 | 532.62 | 3.54646 | 0.054183 | 0.996523 | 393 |
| HC019 | 33173  | 0.97 | 380.33 | 390.18 | 3.33315 | 0.063207 | 0.997438 | 282 |
| HC035 | 37024  | 0.97 | 878.26 | 791.9  | 3.99947 | 0.044495 | 0.9953   | 553 |
| HC018 | 38082  | 0.97 | 592.06 | 596.76 | 3.77308 | 0.046968 | 0.996639 | 459 |
| HC016 | 26669  | 0.97 | 706.27 | 628.92 | 3.54968 | 0.062817 | 0.9946   | 423 |
| HC001 | 30847  | 0.97 | 815.49 | 738.02 | 3.85225 | 0.05323  | 0.994586 | 528 |
| HC002 | 29497  | 0.97 | 644.8  | 669.11 | 3.54139 | 0.078121 | 0.994711 | 457 |
| HC003 | 24987  | 0.97 | 592.73 | 580.23 | 3.58072 | 0.081029 | 0.994477 | 437 |
| HC004 | 29343  | 0.97 | 585.19 | 607.62 | 3.60628 | 0.067757 | 0.995467 | 442 |
| HC005 | 24333  | 0.97 | 592.99 | 624.27 | 3.84007 | 0.060796 | 0.994575 | 458 |
| HC006 | 28078  | 0.97 | 725.09 | 684.13 | 3.84127 | 0.047048 | 0.994836 | 462 |
| HC007 | 20741  | 0.97 | 591.54 | 576.72 | 3.63206 | 0.074743 | 0.993395 | 424 |
| HC008 | 30757  | 0.97 | 683.34 | 681.41 | 3.93056 | 0.036741 | 0.994765 | 492 |
| HC009 | 50519  | 0.97 | 510.51 | 516.27 | 2.90872 | 0.141328 | 0.997704 | 388 |
| HC010 | 44122  | 0.97 | 620.2  | 658.6  | 3.82029 | 0.041401 | 0.996918 | 475 |
| HC011 | 38474  | 0.97 | 716.36 | 635.02 | 3.52804 | 0.077677 | 0.996309 | 453 |
| HC012 | 40096  | 0.97 | 642.36 | 702.06 | 3.538   | 0.06805  | 0.996409 | 483 |
| HC013 | 39888  | 0.97 | 610.91 | 613    | 3.67635 | 0.054077 | 0.996365 | 439 |
| HC014 | 24878  | 0.97 | 623.72 | 562    | 3.69269 | 0.050388 | 0.994815 | 370 |
| HC015 | 31939  | 0.97 | 863.68 | 744.73 | 3.79398 | 0.053149 | 0.994615 | 546 |
| HC017 | 28225  | 0.97 | 776.19 | 775.33 | 4.02921 | 0.04407  | 0.9938   | 575 |
| HC074 | 27274  | 0.97 | 832.32 | 732.02 | 3.7158  | 0.063032 | 0.993767 | 504 |
| HC036 | 29252  | 0.97 | 440.87 | 361.66 | 3.11765 | 0.118791 | 0.997197 | 291 |
| HC038 | 132314 | 0.97 | 884    | 884    | 3.93826 | 0.050039 | 1        | 884 |
| HC058 | 82078  | 0.97 | 381.89 | 386    | 2.45285 | 0.255639 | 0.999111 | 313 |
| HC059 | 43805  | 0.97 | 464.39 | 484    | 2.98817 | 0.168987 | 0.997603 | 354 |
| HC060 | 32409  | 0.97 | 824.39 | 887.52 | 3.6005  | 0.087604 | 0.994014 | 595 |
| HC061 | 29157  | 0.97 | 625.56 | 546.78 | 3.16187 | 0.128493 | 0.995679 | 411 |
| HC062 | 71856  | 0.97 | 447    | 447    | 3.21506 | 0.106941 | 1        | 447 |
| HC063 | 21417  | 0.97 | 942.31 | 829.68 | 4.06778 | 0.036911 | 0.991035 | 508 |
| HC064 | 29213  | 0.97 | 694.48 | 586.63 | 2.98677 | 0.19157  | 0.995173 | 381 |
| HC065 | 41362  | 0.97 | 693.18 | 768.29 | 3.90744 | 0.039486 | 0.996156 | 522 |
| HC066 | 30228  | 0.97 | 577.98 | 618.06 | 3.7127  | 0.060337 | 0.995832 | 454 |
| HC067 | 35121  | 0.97 | 595.58 | 593.84 | 3.56727 | 0.071609 | 0.996071 | 428 |
| HC068 | 28490  | 0.97 | 567.11 | 493.28 | 2.97572 | 0.154655 | 0.996069 | 376 |
| HC069 | 40530  | 0.97 | 664.63 | 556.06 | 3.55612 | 0.069639 | 0.996891 | 392 |
| HC070 | 35365  | 0.97 | 527.27 | 552.55 | 3.49642 | 0.053938 | 0.996437 | 385 |
| HC071 | 33437  | 0.97 | 680.41 | 699.92 | 3.42959 | 0.078703 | 0.995364 | 501 |
| HC072 | 94170  | 0.97 | 600    | 600    | 3.78912 | 0.057371 | 1        | 600 |
| HC057 | 42115  | 0.97 | 568.28 | 497.82 | 2.47985 | 0.208003 | 0.997317 | 354 |
| HC037 | 26665  | 0.97 | 403.71 | 419.84 | 3.34611 | 0.061873 | 0.996362 | 294 |
| HC056 | 39151  | 0.97 | 912.44 | 810.23 | 3.65149 | 0.070335 | 0.995224 | 572 |
| HC054 | 33849  | 0.97 | 594.04 | 559.5  | 3.11127 | 0.112679 | 0.996425 | 378 |
| HC039 | 30209  | 0.97 | 772.37 | 667.83 | 3.99368 | 0.039183 | 0.994869 | 487 |
| HC040 | 53178  | 0.97 | 591.97 | 562.76 | 2.57156 | 0.175383 | 0.997762 | 378 |

|       |       |      |        |        |         |          |          |     |
|-------|-------|------|--------|--------|---------|----------|----------|-----|
| HC041 | 31918 | 0.97 | 603.43 | 615.13 | 3.33544 | 0.131293 | 0.995802 | 456 |
| HC042 | 48300 | 0.97 | 476.79 | 464.21 | 3.40028 | 0.07125  | 0.99795  | 361 |
| HC043 | 30354 | 0.97 | 557.14 | 563.18 | 3.56472 | 0.087955 | 0.99608  | 440 |
| HC044 | 33703 | 0.97 | 461.41 | 479.78 | 3.55814 | 0.054234 | 0.996974 | 351 |
| HC045 | 54578 | 0.97 | 557.88 | 534.59 | 3.25236 | 0.105627 | 0.997911 | 437 |
| HC046 | 29226 | 0.97 | 860.32 | 807.58 | 3.6254  | 0.0726   | 0.993875 | 507 |
| HC047 | 24269 | 0.97 | 655.68 | 562.57 | 3.07674 | 0.147675 | 0.994437 | 419 |
| HC048 | 80130 | 0.97 | 405    | 405    | 3.19075 | 0.086833 | 1        | 405 |
| HC049 | 17018 | 0.97 | 607.28 | 594.01 | 3.75888 | 0.060084 | 0.991656 | 451 |
| HC050 | 25127 | 0.97 | 747.88 | 645.52 | 3.19415 | 0.164694 | 0.993951 | 433 |
| HC051 | 36344 | 0.97 | 707.69 | 708.88 | 3.6233  | 0.069801 | 0.995405 | 508 |
| HC052 | 41699 | 0.97 | 650.3  | 670.42 | 3.43552 | 0.092349 | 0.996499 | 494 |
| HC053 | 39799 | 0.97 | 660.54 | 672.64 | 4.01904 | 0.043197 | 0.996407 | 514 |
| HC055 | 20420 | 0.97 | 745.59 | 650.26 | 3.81769 | 0.058651 | 0.992605 | 455 |
| HC150 | 72542 | 0.97 | 646    | 646    | 3.32005 | 0.102328 | 1        | 646 |

**Table S17. The abundance and composition at the genus level of each sample among CP (n=72), CPR (n=22), and HC (n=150) groups.**

| ID                                 | CP41     | CP34     | CP04     | CP66     | CP69     | CP70     | CP02     | CP25     | CP49     | CP71     | CP60     | CP45     |
|------------------------------------|----------|----------|----------|----------|----------|----------|----------|----------|----------|----------|----------|----------|
| Prevotella                         | 0.964604 | 0.893372 | 0.88895  | 0.820512 | 0.662513 | 0.656041 | 0.62592  | 0.554053 | 0.553898 | 0.550539 | 0.50513  | 0.376425 |
| Neisseria                          | 8.70E-05 | 5.27E-04 | 8.45E-04 | 7.54E-04 | 0.001085 | 6.39E-04 | 0.001678 | 0.087394 | 8.47E-04 | 0.005594 | 0.001362 | 0.025628 |
| Veillonella                        | 0.018557 | 0.010803 | 0.001405 | 0.028469 | 0.207627 | 0.033693 | 0.111726 | 0.103451 | 0.163875 | 0.258732 | 0.37555  | 0.095437 |
| Streptococcus                      | 6.12E-04 | 0.001059 | 4.84E-04 | 0.009307 | 0.002164 | 0.010781 | 0.004072 | 0.050635 | 0.015802 | 0.012025 | 0.04522  | 0.091694 |
| Porphyromonas                      | 2.34E-04 | 2.90E-05 | 1.92E-04 | 6.87E-04 | 1.90E-04 | 5.09E-04 | 4.08E-04 | 0.00165  | 0.004711 | 4.69E-04 | 0        | 0.003707 |
| Fusobacterium                      | 0        | 0        | 3.17E-04 | 2.94E-04 | 0.00526  | 0.001037 | 0.001939 | 0.002123 | 1.91E-04 | 0.005332 | 2.43E-04 | 0.017146 |
| Rothia                             | 7.70E-05 | 5.64E-04 | 0        | 0.004066 | 0.001097 | 0.001197 | 0.087741 | 0.020548 | 0.009985 | 0.01328  | 0.015084 | 0.001059 |
| Leptotrichia                       | 0.001402 | 2.86E-04 | 0.085761 | 8.50E-04 | 0.015408 | 0.197609 | 0.00567  | 0.007513 | 0.028993 | 0.012615 | 4.11E-04 | 0.212246 |
| Actinomyces                        | 0.007883 | 0.080275 | 2.00E-04 | 0.082821 | 0.042683 | 8.53E-04 | 0.016839 | 0.089495 | 0.087478 | 0.076405 | 0.006402 | 0.003915 |
| Haemophilus                        | 0        | 5.80E-05 | 1.09E-04 | 2.24E-04 | 1.85E-04 | 1.40E-05 | 0        | 9.35E-04 | 0.007386 | 1.75E-04 | 1.80E-04 | 0.001138 |
| Granulicatella                     | 7.40E-05 | 2.35E-04 | 0        | 8.84E-04 | 0        | 3.00E-05 | 0.003383 | 7.12E-04 | 8.73E-04 | 0.001141 | 0.001221 | 0.003148 |
| Bacteria_unclassified              | 4.64E-04 | 6.56E-04 | 1.18E-04 | 0.002534 | 0.002995 | 9.90E-05 | 0.00545  | 0.024143 | 0.001366 | 0.00203  | 0.005325 | 0.006486 |
| Lachnoanaerobaculum                | 4.98E-04 | 2.50E-04 | 5.00E-05 | 0.001002 | 0        | 7.47E-04 | 0.090186 | 0.005044 | 0.025092 | 6.87E-04 | 3.25E-04 | 0.044917 |
| Halomonas                          | 0        | 0        | 0        | 1.01E-04 | 0        | 0.004991 | 0        | 0        | 0.001683 | 2.93E-04 | 6.60E-05 | 1.94E-04 |
| Peptostreptococcus                 | 0        | 6.80E-05 | 0.02012  | 4.43E-04 | 0.001728 | 0.043055 | 0.001341 | 0        | 0.002306 | 0.014398 | 6.80E-05 | 0.018376 |
| Candidate_division_TM7_norank      | 0        | 2.50E-04 | 0        | 0.005953 | 2.93E-04 | 1.36E-04 | 7.80E-05 | 0.005703 | 0.01742  | 0.005279 | 0        | 0.002671 |
| Family_XIII_incertae_sedis         | 5.86E-04 | 0.00186  | 0        | 0.002667 | 0.011357 | 6.30E-05 | 0.003893 | 0.004279 | 0.004097 | 0.003474 | 0.00125  | 0.008256 |
| Oribacterium                       | 0        | 0        | 1.47E-04 | 2.50E-05 | 2.00E-04 | 7.10E-05 | 0.006073 | 0.00415  | 3.00E-04 | 9.42E-04 | 6.00E-05 | 0.005595 |
| Gemella                            | 0        | 0        | 1.42E-04 | 0        | 2.76E-04 | 0.003482 | 0        | 0.001147 | 8.91E-04 | 4.30E-05 | 3.19E-04 | 0.002858 |
| Actinobacteria_unclassified        | 7.50E-05 | 0.001345 | 0        | 0.00307  | 0.001493 | 0        | 0.010074 | 0.013088 | 0.001416 | 0.002339 | 0.001608 | 1.80E-05 |
| Solobacterium                      | 0        | 0        | 5.20E-05 | 2.55E-04 | 0.001138 | 1.50E-05 | 3.01E-04 | 0.001025 | 0.001371 | 0.003535 | 6.70E-05 | 0.005286 |
| Capnocytophaga                     | 0        | 2.50E-05 | 0        | 9.28E-04 | 0.001174 | 6.31E-04 | 0        | 0        | 0.004974 | 6.53E-04 | 4.83E-04 | 1.04E-04 |
| Stomatobaculum                     | 0        | 0        | 4.90E-05 | 0.001207 | 0        | 1.55E-04 | 0        | 0.00465  | 1.08E-04 | 0.004157 | 0        | 0.009493 |
| Citrobacter                        | 0        | 0        | 0        | 0        | 0        | 0        | 0        | 0        | 0        | 0        | 0        | 0        |
| Firmicutes_unclassified            | 0        | 6.10E-05 | 4.40E-05 | 9.41E-04 | 0.001186 | 2.33E-04 | 0.012115 | 0.005041 | 5.81E-04 | 0.001068 | 0.012861 | 0.008739 |
| Alloprevotella                     | 1.56E-04 | 0.001712 | 5.80E-05 | 0.005188 | 8.34E-04 | 0.014263 | 0.001888 | 0.001328 | 0.013371 | 0.001799 | 1.18E-04 | 0.002967 |
| Pasteurellaceae_unclassified       | 0        | 0        | 0        | 0        | 0        | 0        | 0        | 8.49E-04 | 2.40E-05 | 1.70E-05 | 0        | 2.83E-04 |
| Megasphaera                        | 0.003207 | 0.003653 | 4.90E-05 | 0.009352 | 0.03246  | 0        | 0.004055 | 0.003793 | 0.028601 | 0.01097  | 0.015221 | 9.90E-05 |
| Lactobacillales_unclassified       | 0        | 2.70E-05 | 0        | 3.70E-05 | 0        | 0        | 9.34E-04 | 4.01E-04 | 3.70E-05 | 4.90E-05 | 8.79E-04 | 0.001131 |
| Candidate_division_SR1_norank      | 0        | 0        | 0        | 0        | 1.02E-04 | 0        | 0        | 0        | 0.001607 | 0        | 0        | 0        |
| Atopobium                          | 0        | 0.001895 | 6.37E-04 | 0.008529 | 0.001719 | 0.009441 | 0.001108 | 0.003066 | 0.009158 | 0.003544 | 0.003791 | 5.68E-04 |
| Corynebacterium                    | 0        | 6.10E-05 | 0        | 0.004744 | 0        | 0        | 0        | 4.99E-04 | 0        | 0.00324  | 0        | 0        |
| Proteobacteria_unclassified        | 0        | 0        | 0        | 0        | 0        | 0        | 0        | 8.20E-05 | 0        | 0        | 0        | 9.40E-05 |
| Parvimonas                         | 0        | 0        | 0        | 0        | 0        | 1.50E-05 | 0        | 0        | 2.60E-05 | 8.03E-04 | 0        | 0.001467 |
| Selenomonas                        | 4.13E-04 | 3.10E-05 | 0        | 6.47E-04 | 0.001237 | 1.51E-04 | 6.83E-04 | 3.09E-04 | 4.90E-05 | 1.74E-04 | 0.002243 | 0.022963 |
| Campylobacter                      | 1.82E-04 | 9.80E-05 | 5.20E-05 | 5.09E-04 | 9.40E-05 | 0.003525 | 1.46E-04 | 1.61E-04 | 0.002083 | 5.99E-04 | 3.94E-04 | 2.70E-05 |
| Tannerella                         | 0        | 0        | 1.12E-04 | 5.90E-05 | 0.001286 | 0.009283 | 0        | 0        | 0.002339 | 0.001195 | 0        | 0        |
| Ruminococcaceae_uncultured         | 0        | 0        | 0        | 0        | 0        | 3.00E-05 | 7.10E-05 | 1.70E-04 | 2.56E-04 | 0        | 0        | 4.90E-05 |
| Lachnospiraceae_uncultured         | 0        | 0        | 5.60E-05 | 3.50E-05 | 0        | 3.20E-05 | 0        | 0        | 1.03E-04 | 2.00E-05 | 0        | 0.013243 |
| Pelagibacterium                    | 0        | 0        | 0        | 0        | 0        | 5.73E-04 | 0        | 0        | 1.02E-04 | 1.30E-05 | 6.00E-05 | 0        |
| Bacilli_unclassified               | 0        | 0        | 0        | 0        | 0        | 2.10E-05 | 3.84E-04 | 7.12E-04 | 6.80E-05 | 1.90E-05 | 5.60E-04 | 0.001178 |
| Xanthomonadaceae_uncultured        | 0        | 0        | 0        | 0        | 0        | 4.57E-04 | 0        | 0        | 1.41E-04 | 0        | 0        | 0        |
| PSD1-392_norank                    | 0        | 0        | 0        | 3.40E-05 | 0        | 0        | 0        | 5.56E-04 | 0        | 2.60E-05 | 0.001299 | 4.70E-04 |
| Phyllobacteriaceae_unclassified    | 0        | 0        | 0        | 0        | 0        | 4.08E-04 | 0        | 0        | 3.50E-05 | 2.00E-05 | 0        | 0        |
| Neisseriaceae_unclassified         | 0        | 0        | 0        | 0        | 0        | 0        | 0        | 2.30E-04 | 0        | 0        | 0        | 7.10E-05 |
| Family_XIII_uncultured             | 0        | 0        | 0        | 0        | 0        | 0        | 0        | 0        | 0        | 0        | 0        | 0.001044 |
| Lactobacillus                      | 0        | 0        | 0        | 2.30E-05 | 0        | 0        | 0        | 0        | 3.60E-05 | 0        | 0        | 0        |
| Peptostreptococcaceae_incertae_sed | 0        | 0        | 0        | 0        | 9.90E-05 | 1.10E-05 | 0        | 0        | 6.40E-05 | 3.90E-05 | 0        | 1.24E-04 |
| Dialister                          | 0        | 6.30E-04 | 0        | 0.001544 | 0        | 0        | 0        | 0        | 1.15E-04 | 2.30E-05 | 5.80E-05 | 0        |
| Kingella                           | 0        | 0        | 0        | 0        | 0        | 0        | 0        | 0        | 0        | 0        | 0        | 0        |
| Olsenella                          | 0        | 0        | 0        | 0        | 0        | 0        | 0        | 0        | 8.80E-05 | 0        | 1.05E-04 | 0        |
| Others                             | 8.89E-04 | 1.70E-04 | 5.10E-05 | 0.001305 | 0.002117 | 0.005709 | 0.001844 | 0.001065 | 0.006053 | 0.002245 | 0.002037 | 0.009686 |

| CP43     | CP40     | CP32     | CP15     | CP55     | CP50     | CP20     | CP28     | CP64     | CP31     | CP03     | CP57     | CP33     | CP36     | CP09     |
|----------|----------|----------|----------|----------|----------|----------|----------|----------|----------|----------|----------|----------|----------|----------|
| 0.351445 | 0.349048 | 0.336191 | 0.331075 | 0.330386 | 0.310502 | 0.308872 | 0.306465 | 0.305265 | 0.300648 | 0.243171 | 0.240362 | 0.235702 | 0.227006 | 0.203374 |
| 0.002402 | 2.54E-04 | 0.394477 | 0.01965  | 0.07474  | 6.28E-04 | 0.011514 | 0.015446 | 0.058892 | 0.080043 | 0.001283 | 0.455863 | 0.025355 | 0.001966 | 0.115168 |
| 0.259446 | 0.192567 | 0.032066 | 0.273999 | 0.154738 | 0.257529 | 0.118958 | 0.105923 | 0.062511 | 0.17079  | 0.309301 | 0.152148 | 0.208099 | 0.280929 | 0.097794 |
| 0.010416 | 0.159482 | 0.004261 | 0.002948 | 0.16222  | 0.021148 | 0.068553 | 7.07E-04 | 0.033655 | 0.031474 | 0.075433 | 0.009733 | 0.006467 | 0.028919 | 0.043517 |
| 3.70E-04 | 1.73E-04 | 0.002182 | 6.75E-04 | 0.019632 | 0        | 0.001659 | 8.60E-05 | 0.046678 | 9.75E-04 | 4.66E-04 | 6.54E-04 | 0.005848 | 2.84E-04 | 2.35E-04 |
| 1.25E-04 | 1.89E-04 | 0.004136 | 0.075938 | 0.02769  | 4.80E-05 | 0.010153 | 0.004671 | 0.081731 | 0.002201 | 6.29E-04 | 0.009008 | 4.41E-04 | 0.006187 | 0.001809 |
| 0.011672 | 0.042953 | 0.002949 | 7.83E-04 | 0.007273 | 0.024676 | 0.002662 | 2.35E-04 | 0.051848 | 0.002956 | 0.015491 | 0.012576 | 0.046791 | 9.70E-04 | 0.085923 |
| 0.132994 | 0.019967 | 0.145019 | 0.076548 | 0.031641 | 0.002879 | 0.364547 | 0.509286 | 0.024062 | 0.31451  | 0.098351 | 0.015131 | 0.006859 | 0.08979  | 0.277794 |
| 0.150321 | 0.1414   | 0.010264 | 0.024952 | 0.056971 | 0.273924 | 0.004143 | 0.021119 | 0.01449  | 0.024201 | 0.05282  | 0.049316 | 0.392843 | 0.255541 | 0.069591 |
| 1.38E-04 | 1.22E-04 | 8.97E-04 | 0.001051 | 0.012484 | 3.00E-05 | 8.33E-04 | 3.11E-04 | 0.006546 | 7.08E-04 | 3.34E-04 | 9.10E-04 | 0.003247 | 0.001067 | 0.005487 |
| 0.003384 | 0.004522 | 0.001466 | 6.50E-04 | 0.001638 | 0.055166 | 9.07E-04 | 2.57E-04 | 0.012922 | 0.001274 | 0.051848 | 1.30E-04 | 5.64E-04 | 0.002368 | 0.007674 |
| 0.009078 | 0.008688 | 0.011595 | 0.017836 | 0.020026 | 0.003405 | 0.001893 | 0.003431 | 0.001977 | 0.012402 | 0.00228  | 0.019487 | 0.010763 | 0.007661 | 0.00532  |
| 0.006353 | 0.003176 | 0.006496 | 0.05232  | 0.019788 | 3.70E-05 | 0.031647 | 7.07E-04 | 0.021051 | 0.010299 | 0.010294 | 0.002569 | 0.002972 | 0.00758  | 0.012134 |
| 0        | 2.79E-04 | 1.41E-04 | 0        | 6.30E-05 | 0.002125 | 0        | 0        | 0        | 0        | 0.002607 | 0        | 0        | 2.74E-04 | 0.002466 |
| 0        | 0.001456 | 7.32E-04 | 0.002505 | 0.001948 | 3.90E-05 | 3.92E-04 | 2.39E-04 | 0.026934 | 4.24E-04 | 6.82E-04 | 0.001025 | 1.32E-04 | 0.005359 | 1.25E-04 |
| 0.001702 | 5.40E-05 | 6.04E-04 | 0.002    | 0.003846 | 0        | 0.010057 | 6.00E-04 | 0.143454 | 7.10E-05 | 0.011442 | 0.00127  | 5.09E-04 | 0.001348 | 0.002066 |
| 3.94E-04 | 0.001499 | 0.00191  | 0.004688 | 0.002547 | 3.70E-05 | 0.001251 | 0.001762 | 0.004573 | 0.002276 | 5.80E-05 | 5.19E-04 | 4.63E-04 | 0.00628  | 2.77E-04 |
| 5.09E-04 | 0.009574 | 0.004449 | 0.005696 | 0.00302  | 0        | 0.005865 | 7.04E-04 | 0.010018 | 0.002565 | 0.026175 | 0.003372 | 3.06E-04 | 0.013256 | 0.003022 |
| 2.63E-04 | 0.015232 | 1.44E-04 | 0.001887 | 8.54E-04 | 0.001891 | 0.001304 | 1.46E-04 | 0.003714 | 3.61E-04 | 0.003668 | 0        | 2.22E-04 | 0.003744 | 0.002093 |
| 0.010501 | 0.012262 | 0.001155 | 1.29E-04 | 0.002591 | 0.004862 | 6.30E-05 | 4.86E-04 | 7.62E-04 | 0.00112  | 0.001488 | 0.006201 | 0.038176 | 0.001021 | 0.009288 |
| 1.37E-04 | 9.44E-04 | 0.001184 | 0.009888 | 0.009936 | 7.01E-04 | 0.001795 | 4.00E-04 | 0.012739 | 8.90E-04 | 0.001051 | 0.001434 | 0.001606 | 0.005121 | 0.002026 |
| 0        | 1.34E-04 | 0        | 2.82E-04 | 5.34E-04 | 0        | 3.41E-04 | 1.45E-04 | 0.032868 | 2.20E-04 | 9.37E-04 | 2.64E-04 | 4.90E-05 | 8.70E-05 | 3.42E-04 |
| 0        | 0.003983 | 0.002313 | 0.036908 | 0.005771 | 0        | 0.00423  | 0.001828 | 0.001607 | 0.002417 | 0.021599 | 2.50E-04 | 9.90E-05 | 0.003051 | 0.004092 |
| 0        | 0        | 0        | 0        | 0        | 0        | 0        | 0        | 0        | 0        | 0        | 0        | 0        | 0        | 0        |
| 0.008004 | 0.006154 | 0.001159 | 0.00967  | 0.007767 | 0.013796 | 0.001048 | 0.001478 | 4.51E-04 | 0.005495 | 0.007613 | 0.001869 | 0.001302 | 0.003731 | 0.001458 |
| 0.001028 | 6.40E-05 | 0.0097   | 0.002625 | 0.008815 | 4.30E-05 | 0.005043 | 0.002214 | 0.010777 | 2.26E-04 | 0.007771 | 0.001279 | 9.30E-05 | 1.99E-04 | 2.01E-04 |
| 0        | 0        | 4.17E-04 | 1.39E-04 | 0.001724 | 0        | 4.10E-05 | 0        | 4.13E-04 | 2.08E-04 | 4.30E-05 | 2.46E-04 | 6.59E-04 | 1.49E-04 | 0.001393 |
| 0.027286 | 0.006045 | 0.002339 | 0.007097 | 0.011089 | 1.51E-04 | 0.001849 | 0.01791  | 0.002349 | 0.0067   | 0.019714 | 0.007871 | 0.004527 | 0.010892 | 0.003669 |
| 5.46E-04 | 0.002725 | 4.22E-04 | 1.38E-04 | 0.005668 | 0.003655 | 1.24E-04 | 0        | 9.31E-04 | 6.86E-04 | 0.003543 | 2.55E-04 | 9.60E-05 | 6.89E-04 | 0.001263 |
| 0        | 0        | 0        | 0.02307  | 2.99E-04 | 0        | 1.79E-04 | 0        | 3.30E-05 | 7.40E-05 | 1.70E-05 | 6.30E-04 | 0        | 0        | 0        |
| 4.98E-04 | 0.002578 | 2.85E-04 | 0.001158 | 0.001192 | 0.01355  | 4.80E-05 | 4.90E-04 | 0.010526 | 4.28E-04 | 0.014933 | 5.10E-04 | 0.001517 | 0.007067 | 0.009709 |
| 0        | 0        | 2.74E-04 | 0        | 4.88E-04 | 0        | 0.001596 | 0        | 1.03E-04 | 0        | 0        | 0        | 0        | 0        | 0.001317 |
| 0        | 0        | 0.00133  | 1.39E-04 | 0.0015   | 0        | 0        | 0        | 0        | 9.50E-04 | 0        | 9.05E-04 | 2.35E-04 | 0        | 0        |
| 0        | 6.80E-05 | 0        | 0        | 7.45E-04 | 0        | 8.90E-05 | 0        | 7.40E-05 | 0        | 0        | 0        | 0        | 1.51E-04 | 0        |
| 0.006863 | 0.004836 | 0.006546 | 0.001578 | 0        | 0        | 0.007029 | 2.34E-04 | 0.001686 | 0.010165 | 0.001156 | 0.0013   | 0.002101 | 0.013048 | 0.006317 |
| 0        | 6.33E-04 | 8.60E-04 | 5.55E-04 | 0        | 3.88E-04 | 0.007422 | 3.87E-04 | 0.003221 | 7.78E-04 | 0.00268  | 0        | 4.80E-05 | 7.77E-04 | 2.14E-04 |
| 1.32E-04 | 5.80E-05 | 0        | 1.29E-04 | 0.001371 | 0        | 8.18E-04 | 0        | 1.57E-04 | 0.001666 | 1.60E-05 | 0        | 0        | 0        | 3.90E-05 |
| 0        | 0        | 1.35E-04 | 0.001704 | 0.003235 | 1.22E-04 | 0.00848  | 0        | 4.75E-04 | 6.50E-04 | 6.55E-04 | 2.45E-04 | 5.10E-05 | 0.00123  | 4.99E-04 |
| 0        | 0        | 0.00574  | 0.001986 | 1.43E-04 | 3.10E-05 | 0.007067 | 0        | 0.003425 | 0.002993 | 0        | 0        | 0        | 0.001141 | 0.016564 |
| 0        | 0        | 0        | 0        | 0        | 3.17E-04 | 0        | 0        | 0        | 0        | 1.48E-04 | 0        | 0        | 9.50E-05 | 1.65E-04 |
| 3.73E-04 | 0.00301  | 0        | 5.11E-04 | 2.72E-04 | 3.54E-04 | 1.89E-04 | 7.70E-05 | 1.31E-04 | 1.71E-04 | 9.42E-04 | 0        | 2.09E-04 | 0.001066 | 3.38E-04 |
| 0        | 7.40E-05 | 0        | 0        | 0        | 9.80E-05 | 0        | 0        | 0        | 7.00E-05 | 1.20E-04 | 0        | 0        | 1.39E-04 | 1.76E-04 |
| 3.89E-04 | 6.74E-04 | 1.56E-04 | 0        | 3.48E-04 | 5.24E-04 | 0        | 0        | 2.70E-05 | 1.40E-04 | 0.00135  | 0        | 0        | 1.03E-04 | 2.05E-04 |
| 0        | 5.50E-05 | 0        | 0        | 0        | 1.78E-04 | 0        | 0        | 0        | 0        | 1.19E-04 | 0        | 0        | 0        | 4.86E-04 |
| 0        | 0        | 7.32E-04 | 1.25E-04 | 2.85E-04 | 0        | 0        | 0        | 6.30E-05 | 0.001964 | 1.00E-05 | 2.55E-04 | 8.30E-05 | 0        | 1.52E-04 |
| 0        | 0        | 0        | 1.26E-04 | 6.70E-05 | 0        | 0        | 0        | 0        | 6.50E-05 | 0        | 0        | 0        | 1.87E-04 | 0        |
| 0        | 0        | 0        | 0        | 0        | 0        | 0        | 0        | 5.20E-05 | 0        | 0        | 0        | 0        | 0        | 0        |
| 0        | 0        | 0        | 1.37E-04 | 0        | 0        | 0        | 0        | 3.40E-04 | 0        | 0        | 0        | 1.06E-04 | 0        | 0        |
| 0.001824 | 1.17E-04 | 1.38E-04 | 0.001351 | 3.41E-04 | 3.60E-05 | 4.07E-04 | 2.44E-04 | 0        | 6.00E-05 | 3.62E-04 | 0.001009 | 0        | 6.44E-04 | 3.35E-04 |
| 0        | 0        | 0        | 0        | 2.13E-04 | 0        | 0        | 0        | 3.60E-05 | 0        | 3.90E-05 | 0        | 0        | 0        | 0        |
| 0        | 0        | 0        | 0        | 0        | 0        | 0        | 0        | 0        | 0        | 9.90E-05 | 0        | 0        | 0        | 0        |
| 0.001407 | 0.004951 | 0.005136 | 0.005354 | 0.004101 | 0.00713  | 0.006932 | 0.002012 | 0.006433 | 0.003686 | 0.007262 | 0.001404 | 0.00146  | 0.008883 | 0.003883 |

| CP14     | CP11     | CP27     | CP53     | CP62     | CP16     | CP30     | CP17     | CP26     | CP48     | CP35     | CP52     | CP67     | CP37     | CP68     |
|----------|----------|----------|----------|----------|----------|----------|----------|----------|----------|----------|----------|----------|----------|----------|
| 0.199218 | 0.178377 | 0.160133 | 0.152678 | 0.144195 | 0.13732  | 0.134483 | 0.104195 | 0.100825 | 0.098093 | 0.096209 | 0.095134 | 0.093937 | 0.084358 | 0.080826 |
| 0.083892 | 0.117656 | 0.243302 | 0.367488 | 0.2216   | 0.180118 | 0.145747 | 0.023559 | 0.2143   | 0.140262 | 7.37E-04 | 0.005611 | 0.093364 | 1.73E-04 | 2.65E-04 |
| 0.093262 | 0.128078 | 0.174633 | 0.067238 | 0.092678 | 0.232746 | 0.081735 | 0.037611 | 0.308437 | 0.07666  | 0.551578 | 0.103321 | 0.266841 | 0.154258 | 0.133925 |
| 0.081636 | 0.079217 | 0.010766 | 0.027461 | 0.052395 | 0.019311 | 0.270862 | 0.011598 | 0.155635 | 0.006984 | 0.007825 | 0.11187  | 0.095008 | 0.400697 | 0.263218 |
| 0.012903 | 0.023663 | 0.021848 | 0.11163  | 0.049365 | 0.001108 | 0.016517 | 0.005567 | 0.004374 | 0.001244 | 0.174174 | 0.00437  | 0.0713   | 0        | 0.004315 |
| 0.183858 | 0.018491 | 0.034427 | 0.087079 | 0.036577 | 0.024601 | 0.022906 | 0.05117  | 9.20E-04 | 0.003259 | 3.67E-04 | 0.028768 | 0.021191 | 0        | 3.34E-04 |
| 0.006199 | 0.194546 | 0.006995 | 0.044582 | 0.090402 | 0.014631 | 0.049424 | 0.017735 | 0.057737 | 0.006777 | 0.016438 | 0.028609 | 0.089841 | 0.169617 | 0.295893 |
| 0.036282 | 0.014657 | 0.110427 | 0.023001 | 0.103622 | 0.241701 | 0.016726 | 0.629861 | 0.007714 | 0.528556 | 2.03E-04 | 0.490105 | 0.027343 | 0.002157 | 0.001281 |
| 0.087945 | 0.055    | 0.134697 | 7.09E-04 | 0.013187 | 0.049657 | 0.021604 | 0.046084 | 0.028837 | 0.077178 | 0.047085 | 5.51E-04 | 0.002701 | 0.001277 | 0.045249 |
| 0.001263 | 0.007208 | 0.011339 | 0.011749 | 0.005449 | 5.33E-04 | 1.21E-04 | 5.12E-04 | 0.002369 | 6.72E-04 | 2.49E-04 | 0.001133 | 0.011135 | 0.031102 | 0.002239 |
| 0.006641 | 0.005506 | 0.003856 | 0.00461  | 0.019448 | 0.001957 | 0.060747 | 0.00332  | 0.024619 | 0.004275 | 1.85E-04 | 0.026707 | 0.099473 | 0.013245 | 0.009382 |
| 0.00954  | 0.015643 | 0.027051 | 0.007079 | 0.004174 | 0.012446 | 5.48E-04 | 0.010051 | 0.006836 | 0.008626 | 9.28E-04 | 4.53E-04 | 3.30E-05 | 0.008526 | 0.001746 |
| 0.022671 | 0.017579 | 0.012239 | 0.015907 | 0.017905 | 0.009243 | 0.008538 | 0.009035 | 0.011204 | 0.001027 | 7.40E-05 | 0.023407 | 0.001422 | 0.001901 | 7.00E-05 |
| 0        | 1.88E-04 | 0        | 1.50E-05 | 6.00E-05 | 0        | 0.016495 | 6.50E-05 | 0        | 1.72E-04 | 0.00696  | 0        | 0.023093 | 5.24E-04 | 0.003195 |
| 0.001173 | 0.015726 | 4.30E-04 | 0.004737 | 0.004591 | 5.72E-04 | 0.012609 | 0.003075 | 0.006636 | 8.58E-04 | 0        | 0.002557 | 0.003755 | 0.013344 | 0.014474 |
| 0.024058 | 0.001497 | 0.00468  | 0.011908 | 0.055916 | 0.012882 | 0.055648 | 0.002347 | 0.007489 | 7.02E-04 | 1.03E-04 | 0.026032 | 1.08E-04 | 0        | 0.012446 |
| 0.001061 | 0.001299 | 0.004536 | 0.002518 | 0.002411 | 0.003036 | 0.007764 | 0.004353 | 0.005555 | 0.001439 | 2.40E-05 | 0.001157 | 6.60E-05 | 0        | 1.99E-04 |
| 0.015009 | 0.005472 | 0.001979 | 0.00483  | 0.007764 | 0.003553 | 0.012809 | 0.00314  | 0.018613 | 0.001293 | 2.30E-05 | 0.005117 | 1.46E-04 | 2.58E-04 | 2.20E-04 |
| 0.003795 | 0.010446 | 3.19E-04 | 7.50E-04 | 0.001498 | 5.10E-04 | 0.017063 | 0.00201  | 0.003037 | 9.28E-04 | 1.91E-04 | 0.00264  | 5.10E-04 | 0.064202 | 0.001554 |
| 0.008324 | 0.013512 | 0.007547 | 4.61E-04 | 0.00209  | 0.005527 | 1.13E-04 | 0.007127 | 0.002568 | 0.003644 | 3.06E-04 | 2.70E-05 | 0        | 5.80E-04 | 0.002626 |
| 0.023438 | 0.029675 | 5.45E-04 | 0.002479 | 0.006864 | 0.003595 | 0.010092 | 0.001393 | 0.007051 | 7.87E-04 | 3.90E-05 | 0.003074 | 0.006947 | 0.001619 | 0.001629 |
| 0.045609 | 5.24E-04 | 1.80E-04 | 0.007182 | 0.00272  | 4.99E-04 | 0.00146  | 1.94E-04 | 8.70E-05 | 0        | 5.60E-05 | 1.21E-04 | 0.004501 | 0        | 0.081868 |
| 0.001307 | 0.042084 | 0.003539 | 0.004531 | 0.003717 | 0.003211 | 3.36E-04 | 0.003948 | 0.004209 | 0.001014 | 0        | 0.007206 | 6.97E-04 | 0.002677 | 0        |
| 0        | 0        | 0        | 0        | 0        | 0        | 0        | 0        | 0        | 0        | 0        | 0        | 1.90E-05 | 0        | 0        |
| 0.00118  | 0.004899 | 0.005728 | 5.69E-04 | 0.00104  | 0.003903 | 3.59E-04 | 0.002016 | 0.004682 | 0.003324 | 0        | 2.50E-04 | 0        | 0.013026 | 3.74E-04 |
| 0.002469 | 3.85E-04 | 0.001144 | 0.011014 | 0.001367 | 0.005014 | 0.003217 | 7.50E-04 | 0.001268 | 1.93E-04 | 6.80E-05 | 1.80E-04 | 0.002815 | 0        | 1.62E-04 |
| 1.18E-04 | 0.001589 | 0.002629 | 0.001093 | 3.75E-04 | 2.19E-04 | 0        | 3.33E-04 | 1.03E-04 | 5.22E-04 | 0        | 0        | 0        | 0        | 0        |
| 0.003056 | 3.50E-05 | 0.003193 | 0.001454 | 0.005475 | 0.010593 | 0.00144  | 8.55E-04 | 0.00314  | 0.00143  | 0.002795 | 0.01697  | 0.006595 | 6.56E-04 | 2.39E-04 |
| 8.48E-04 | 0.00185  | 8.74E-04 | 3.35E-04 | 0.001275 | 3.83E-04 | 0.002043 | 7.62E-04 | 0.002688 | 6.55E-04 | 0        | 4.52E-04 | 2.31E-04 | 0.008164 | 6.26E-04 |
| 0.006124 | 0        | 0        | 0.001276 | 0.001525 | 0        | 0        | 2.78E-04 | 0        | 0        | 0        | 0        | 0        | 0        | 2.30E-05 |
| 1.49E-04 | 0.001828 | 2.92E-04 | 2.22E-04 | 0.003848 | 9.22E-04 | 0.004235 | 2.90E-04 | 9.57E-04 | 2.03E-04 | 0        | 1.94E-04 | 0.002506 | 2.98E-04 | 0.001063 |
| 0.012358 | 0        | 0        | 2.00E-05 | 1.44E-04 | 0        | 6.00E-05 | 0        | 2.80E-05 | 0        | 0        | 0        | 0.001255 | 0        | 0        |
| 3.50E-05 | 7.79E-04 | 0.004476 | 8.18E-04 | 0        | 9.08E-04 | 0        | 0        | 6.50E-05 | 2.86E-04 | 0        | 0        | 0        | 4.30E-05 | 0        |
| 5.33E-04 | 0        | 6.70E-05 | 0.003695 | 1.52E-04 | 0        | 4.20E-04 | 2.00E-04 | 0        | 0        | 0        | 3.25E-04 | 0        | 0        | 0.00266  |
| 1.48E-04 | 5.50E-05 | 2.31E-04 | 0        | 0.005479 | 0.006664 | 1.14E-04 | 0.001811 | 2.94E-04 | 0.014852 | 3.26E-04 | 2.63E-04 | 0.003105 | 1.70E-04 | 0.002546 |
| 0.001169 | 4.60E-05 | 1.20E-04 | 1.02E-04 | 4.69E-04 | 1.54E-04 | 4.67E-04 | 1.19E-04 | 4.34E-04 | 7.70E-04 | 0.059205 | 2.90E-05 | 0.039587 | 0.00363  | 9.35E-04 |
| 0.001799 | 0        | 3.18E-04 | 0.004617 | 0.00259  | 3.09E-04 | 7.24E-04 | 0.00326  | 3.50E-05 | 0        | 5.50E-05 | 0        | 2.30E-05 | 0        | 0.008444 |
| 0.009856 | 1.72E-04 | 0        | 7.47E-04 | 0.009052 | 0.005543 | 0.013656 | 0.003347 | 0.002183 | 0.005781 | 3.10E-05 | 0.002402 | 4.80E-05 | 0        | 2.60E-05 |
| 3.70E-05 | 0.005638 | 0        | 4.70E-05 | 0.021396 | 0        | 2.50E-05 | 0.001093 | 1.13E-04 | 5.50E-04 | 0        | 0.002414 | 0        | 4.90E-05 | 0        |
| 0        | 0        | 0        | 0        | 0        | 0        | 0.001089 | 0        | 0        | 4.40E-05 | 6.82E-04 | 0        | 0.001048 | 7.90E-05 | 6.70E-05 |
| 1.20E-04 | 0.002669 | 8.20E-04 | 5.70E-05 | 4.58E-04 | 5.24E-04 | 5.20E-05 | 4.83E-04 | 3.12E-04 | 2.60E-04 | 1.50E-05 | 0        | 0        | 0.010095 | 5.20E-05 |
| 0        | 7.40E-05 | 0        | 0        | 0        | 0        | 6.50E-04 | 0        | 0        | 0        | 4.16E-04 | 0        | 9.77E-04 | 0        | 2.84E-04 |
| 2.59E-04 | 4.38E-04 | 6.15E-04 | 6.80E-05 | 3.88E-04 | 2.47E-04 | 2.94E-04 | 5.29E-04 | 3.15E-04 | 1.64E-04 | 0        | 1.42E-04 | 1.40E-05 | 0.005052 | 8.40E-05 |
| 0        | 1.10E-04 | 0        | 0        | 0        | 0        | 4.96E-04 | 0        | 0        | 1.60E-04 | 3.60E-04 | 0        | 9.21E-04 | 0        | 9.30E-05 |
| 9.20E-05 | 1.57E-04 | 1.95E-04 | 4.07E-04 | 0.00162  | 3.51E-04 | 0        | 1.25E-04 | 6.90E-05 | 4.80E-04 | 2.23E-04 | 1.66E-04 | 8.06E-04 | 0        | 0        |
| 6.40E-05 | 0        | 5.80E-05 | 2.44E-04 | 2.61E-04 | 5.38E-04 | 4.93E-04 | 1.99E-04 | 4.39E-04 | 4.30E-05 | 2.00E-05 | 0        | 0        | 0        | 8.60E-05 |
| 0        | 0        | 0        | 0        | 0        | 0        | 0        | 0        | 0        | 4.16E-04 | 0        | 6.80E-05 | 0        | 0.001466 | 2.00E-05 |
| 1.66E-04 | 0        | 0        | 1.14E-04 | 4.80E-05 | 7.10E-05 | 1.28E-04 | 0        | 0        | 0        | 0        | 0        | 0.001035 | 0        | 2.53E-04 |
| 7.12E-04 | 0        | 1.33E-04 | 2.10E-05 | 1.37E-04 | 7.00E-05 | 0        | 1.30E-04 | 6.60E-05 | 0.001454 | 2.70E-05 | 0        | 1.64E-04 | 4.90E-05 | 0.001232 |
| 0        | 0        | 0        | 0        | 0        | 0        | 0        | 0        | 0        | 1.24E-04 | 0.028598 | 0        | 2.19E-04 | 0        | 0        |
| 0        | 0        | 0        | 0        | 0        | 0        | 9.60E-05 | 0        | 0        | 0        | 0        | 0        | 8.70E-05 | 0        | 0.014913 |
| 0.009624 | 0.003232 | 0.003639 | 0.012458 | 0.004273 | 0.00483  | 0.005595 | 0.00547  | 0.003757 | 0.003839 | 0.003425 | 0.008175 | 0.025133 | 0.006708 | 0.008864 |

| CP42     | CP56     | CP39     | CP44     | CP63     | CP47     | CP10     | CP51     | CP72     | CP29     | CP13     | CP61     | CP05     | CP59     | CP46     |
|----------|----------|----------|----------|----------|----------|----------|----------|----------|----------|----------|----------|----------|----------|----------|
| 0.078296 | 0.077049 | 0.0725   | 0.06927  | 0.061147 | 0.05604  | 0.054304 | 0.051598 | 0.050016 | 0.047694 | 0.03881  | 0.036666 | 0.033624 | 0.03329  | 0.03268  |
| 0.197106 | 0.683173 | 0.001222 | 0.439546 | 0.246413 | 0.031925 | 0.638654 | 0.336212 | 6.20E-05 | 3.11E-04 | 0.002637 | 0.260244 | 0.119901 | 0.736433 | 0.060846 |
| 0.055233 | 0.044536 | 0.155934 | 0.078144 | 0.02341  | 0.035847 | 0.023049 | 0.073871 | 0.114113 | 0.514387 | 0.087621 | 0.040642 | 0.040781 | 0.026185 | 0.095922 |
| 0.165084 | 0.01604  | 0.068766 | 0.016244 | 0.080196 | 0.003689 | 0.011591 | 0.047746 | 0.425692 | 0.018225 | 0.294362 | 0.046753 | 0.067937 | 0.017212 | 0.011558 |
| 0.00573  | 4.90E-04 | 3.12E-04 | 0.004791 | 0.001277 | 4.01E-04 | 0.068554 | 0.038091 | 0.001229 | 0.375376 | 5.90E-05 | 0.152448 | 0.357624 | 0.026403 | 6.20E-05 |
| 0.030159 | 0.010626 | 0.0033   | 0.160813 | 0.311809 | 0.117129 | 0.082902 | 0.069108 | 0.022744 | 0        | 0.006804 | 0.137946 | 0        | 0.03052  | 0.003914 |
| 0.054753 | 0.002079 | 0.007474 | 0.053749 | 0.05727  | 8.10E-05 | 0.006694 | 0.033838 | 0.093606 | 0.012865 | 0.294794 | 0.030993 | 0.121098 | 0.022933 | 0.011159 |
| 0.009432 | 0.094784 | 0.233643 | 0.065267 | 0.114784 | 0.637236 | 0.009979 | 0.150454 | 0.013102 | 0.003158 | 0.007062 | 0.06385  | 0.095833 | 0.015057 | 0.628378 |
| 0.07701  | 0.010495 | 0.301763 | 0.002384 | 0.010108 | 0.004291 | 0.002757 | 0.01384  | 0.019811 | 6.10E-05 | 0.143136 | 0.001175 | 0.033045 | 0.03789  | 0.099364 |
| 0.010149 | 0.002893 | 0.001159 | 1.42E-04 | 0.022902 | 0.003215 | 0.02234  | 0.047924 | 0.002891 | 0.002127 | 0.0013   | 0.021368 | 0.010825 | 0.004248 | 0.011908 |
| 0.084443 | 2.43E-04 | 0.004684 | 0.005398 | 0.02484  | 2.53E-04 | 0.001895 | 0.027964 | 0.042899 | 3.81E-04 | 5.12E-04 | 0.020361 | 0.004345 | 0.011256 | 0.007122 |
| 0.029343 | 0.023731 | 0.020399 | 0.022231 | 0.002425 | 0.004904 | 0.023871 | 1.10E-05 | 0.004032 | 0.004454 | 0.026285 | 0.005195 | 0.028333 | 0.003262 | 0.005695 |
| 0.018661 | 0.005804 | 0.013817 | 0.017526 | 0.010047 | 0.072451 | 0.00807  | 0.010798 | 0.006177 | 0.001702 | 0.002429 | 0.010032 | 0.009933 | 0.00687  | 0.004995 |
| 4.83E-04 | 0        | 0        | 0        | 1.73E-04 | 3.04E-04 | 0        | 0.019891 | 0.002572 | 0        | 5.10E-05 | 3.20E-05 | 3.18E-04 | 3.80E-05 | 2.39E-04 |
| 0.001984 | 0.001375 | 8.40E-05 | 0.007869 | 0.004998 | 7.33E-04 | 0.003534 | 0.00303  | 0.002645 | 7.00E-04 | 0.001001 | 0.014816 | 0.027714 | 8.01E-04 | 2.15E-04 |
| 0.002205 | 8.57E-04 | 0.002296 | 1.36E-04 | 0.001714 | 7.09E-04 | 0        | 0.006757 | 0.018968 | 0        | 0.001444 | 0.008009 | 0        | 0.00218  | 8.07E-04 |
| 0.003496 | 0.001007 | 0.001455 | 0.002529 | 0.001321 | 0.002273 | 0.001026 | 0.001664 | 0.007082 | 0        | 7.10E-05 | 0.004185 | 3.19E-04 | 0.001671 | 3.62E-04 |
| 0.004329 | 6.27E-04 | 0.01313  | 0.006449 | 0.001556 | 0.001606 | 0.002548 | 0.001214 | 0.01434  | 0        | 0.002286 | 0.019162 | 5.60E-05 | 0.002705 | 5.98E-04 |
| 0.002956 | 5.09E-04 | 0.003268 | 0.001893 | 0.002016 | 3.17E-04 | 3.04E-04 | 0.011854 | 0.077259 | 0        | 0.008619 | 0.006066 | 0        | 0.001968 | 0.002654 |
| 0.014518 | 9.55E-04 | 0.009451 | 0.00118  | 3.57E-04 | 0        | 3.99E-04 | 0        | 0.00154  | 0        | 0.065186 | 5.60E-05 | 0.017349 | 0.001558 | 0.00262  |
| 0.001918 | 1.23E-04 | 0.006091 | 2.67E-04 | 0.005538 | 3.84E-04 | 0        | 0.007288 | 0.017858 | 0.00184  | 9.35E-04 | 0.002321 | 0.002777 | 0.002111 | 0.00135  |
| 3.60E-04 | 2.33E-04 | 3.26E-04 | 0.00593  | 0.00181  | 0.001678 | 0.002017 | 0.011854 | 9.80E-05 | 0        | 1.43E-04 | 0.030096 | 0.005671 | 0.002083 | 0        |
| 0.002105 | 2.50E-04 | 0.005444 | 0.015372 | 3.46E-04 | 0.015517 | 0.004052 | 5.06E-04 | 0.009497 | 1.18E-04 | 0.004821 | 0.01569  | 7.60E-05 | 0.001725 | 0.002215 |
| 0        | 0        | 0        | 0        | 0        | 0        | 0        | 2.05E-04 | 8.10E-05 | 0        | 0        | 0        | 0        | 0        | 0        |
| 0.013327 | 0.001006 | 0.004752 | 0.003793 | 3.59E-04 | 0.002268 | 0.002017 | 1.50E-05 | 0.002376 | 0.003161 | 0.002305 | 4.03E-04 | 0.002991 | 4.03E-04 | 0.001777 |
| 3.62E-04 | 0.002247 | 4.85E-04 | 0        | 0.001563 | 5.20E-05 | 0.001216 | 0.001978 | 0.001819 | 0.001029 | 2.45E-04 | 0.005595 | 6.03E-04 | 0.001317 | 6.60E-05 |
| 0.002477 | 0.00149  | 8.60E-05 | 0        | 9.37E-04 | 3.05E-04 | 0.008427 | 0        | 2.60E-05 | 0        | 6.00E-05 | 0.001261 | 0.00355  | 8.95E-04 | 0.002013 |
| 0.002    | 6.30E-04 | 0.030737 | 0        | 1.52E-04 | 8.70E-05 | 1.03E-04 | 1.26E-04 | 0.006836 | 0.002244 | 0        | 1.33E-04 | 0        | 1.65E-04 | 0.003308 |
| 0.017566 | 3.90E-04 | 0.002285 | 0.001739 | 0.001223 | 9.00E-05 | 5.98E-04 | 4.10E-05 | 0.00713  | 1.69E-04 | 6.00E-05 | 4.21E-04 | 0.001853 | 5.18E-04 | 5.29E-04 |
| 0        | 2.51E-04 | 0        | 0        | 0        | 0        | 0        | 0        | 0        | 0        | 0        | 0.003034 | 1.28E-04 | 6.40E-05 | 0        |
| 0.005112 | 0        | 0.004432 | 1.38E-04 | 7.70E-05 | 3.21E-04 | 1.99E-04 | 0.002138 | 0.006931 | 1.33E-04 | 5.64E-04 | 6.09E-04 | 1.27E-04 | 4.71E-04 | 0.00109  |
| 0.060682 | 2.35E-04 | 0        | 0        | 0        | 0        | 0        | 1.70E-05 | 0        | 5.80E-05 | 0        | 4.95E-04 | 0        | 3.88E-04 | 0        |
| 0.004112 | 0.0011   | 8.30E-05 | 0        | 4.18E-04 | 3.70E-04 | 0.012024 | 0        | 0        | 0        | 0        | 0.002002 | 0.001094 | 1.59E-04 | 1.56E-04 |
| 0        | 0        | 0        | 0        | 0        | 4.30E-05 | 0        | 6.00E-06 | 0.001884 | 0        | 0        | 0.005419 | 2.33E-04 | 1.37E-04 | 0        |
| 8.59E-04 | 0.006677 | 0.014078 | 1.31E-04 | 0        | 2.60E-04 | 1.00E-04 | 2.20E-04 | 4.01E-04 | 0.005073 | 5.66E-04 | 0.001638 | 0        | 9.40E-05 | 3.22E-04 |
| 6.20E-04 | 1.25E-04 | 2.48E-04 | 1.22E-04 | 0.003204 | 8.96E-04 | 3.27E-04 | 0.008749 | 8.10E-05 | 3.05E-04 | 3.18E-04 | 0.002355 | 0        | 9.14E-04 | 5.42E-04 |
| 4.94E-04 | 3.56E-04 | 0        | 0        | 1.02E-04 | 0        | 0        | 5.80E-04 | 7.68E-04 | 0        | 0        | 0.004921 | 0.001343 | 1.69E-04 | 0        |
| 1.30E-04 | 3.93E-04 | 0.002918 | 3.99E-04 | 4.00E-05 | 0        | 3.05E-04 | 0.001304 | 0.002599 | 0        | 5.80E-05 | 0.001253 | 0        | 0.001018 | 4.40E-04 |
| 0.012085 | 0.001295 | 0.004066 | 0.003474 | 0        | 9.43E-04 | 3.03E-04 | 0.002194 | 0        | 0        | 4.23E-04 | 1.86E-04 | 0        | 3.10E-05 | 3.40E-05 |
| 0        | 0        | 0        | 0        | 7.50E-05 | 4.60E-05 | 0        | 0.001461 | 2.38E-04 | 0        | 0        | 0        | 0        | 0        | 2.00E-05 |
| 0.002619 | 3.74E-04 | 0.001404 | 9.55E-04 | 3.60E-05 | 9.10E-05 | 2.08E-04 | 0        | 0.005135 | 0        | 0.002571 | 2.64E-04 | 0        | 5.00E-05 | 4.85E-04 |
| 0        | 0        | 0        | 0        | 0        | 0        | 0        | 0.00115  | 3.25E-04 | 0        | 0        | 0        | 0        | 0        | 0        |
| 0.01168  | 0        | 9.44E-04 | 9.53E-04 | 3.35E-04 | 0        | 3.92E-04 | 0        | 0.001831 | 9.00E-05 | 1.27E-04 | 3.02E-04 | 2.81E-04 | 1.89E-04 | 1.20E-04 |
| 0        | 0        | 0        | 0        | 2.80E-05 | 4.00E-05 | 0        | 7.98E-04 | 1.46E-04 | 0        | 0        | 0        | 0        | 0        | 0        |
| 3.62E-04 | 0.001303 | 0        | 0.001361 | 7.60E-05 | 2.25E-04 | 0.002121 | 2.42E-04 | 0        | 0        | 0        | 5.79E-04 | 1.30E-04 | 2.62E-04 | 3.40E-05 |
| 1.21E-04 | 0        | 0        | 0.001568 | 0        | 4.54E-04 | 0        | 1.61E-04 | 2.53E-04 | 0        | 5.80E-05 | 0.008435 | 0        | 6.20E-05 | 0        |
| 0        | 0        | 0        | 0        | 0        | 0        | 0        | 1.90E-05 | 0        | 0        | 0        | 0        | 0        | 0        | 6.10E-05 |
| 0        | 0        | 0        | 3.95E-04 | 6.50E-05 | 0        | 0        | 6.80E-05 | 7.16E-04 | 0        | 0        | 0.001545 | 0        | 9.70E-05 | 0        |
| 0        | 0        | 8.24E-04 | 0        | 8.70E-05 | 0        | 0        | 7.20E-05 | 8.90E-04 | 5.30E-05 | 3.29E-04 | 7.44E-04 | 0        | 2.40E-05 | 8.80E-05 |
| 0        | 0        | 0        | 0        | 0        | 0        | 0        | 8.60E-05 | 5.50E-05 | 0        | 0        | 0        | 0        | 0        | 0        |
| 0        | 0        | 0        | 0        | 0        | 0        | 0        | 4.00E-06 | 3.30E-05 | 0        | 0        | 0        | 0        | 0        | 0        |
| 0.015639 | 0.004249 | 0.00614  | 0.007842 | 0.004766 | 0.002526 | 0.00312  | 0.012853 | 0.011213 | 0.004286 | 0.001948 | 0.0303   | 0.010108 | 0.004174 | 0.004252 |

| CP12     | CP06     | CP22     | CP01     | CP07     | CP54     | CP38     | CP19     | CP24     | CP21     | CP18     | CP65     | CP08     | CP58     | CP23     |
|----------|----------|----------|----------|----------|----------|----------|----------|----------|----------|----------|----------|----------|----------|----------|
| 0.031995 | 0.028575 | 0.02656  | 0.023122 | 0.018457 | 0.015172 | 0.013622 | 0.013275 | 0.012118 | 0.007827 | 0.006896 | 0.006073 | 0.003472 | 0.003372 | 6.58E-04 |
| 0.767602 | 0.104441 | 0.072419 | 5.21E-04 | 0.005204 | 0.786058 | 6.50E-04 | 0.775247 | 0.013917 | 0.825581 | 0.049835 | 0.934035 | 0.018616 | 0.861216 | 2.94E-04 |
| 0.023366 | 0.14498  | 0.095995 | 0.019152 | 0.322818 | 0.021385 | 0.139722 | 0.02415  | 0.023142 | 0.010923 | 0.050479 | 0.006544 | 0.00116  | 0.009358 | 3.05E-04 |
| 0.016333 | 0.135998 | 0.129963 | 0.13317  | 0.104958 | 0.018535 | 0.025483 | 0.025945 | 0.336131 | 0.00451  | 0.314498 | 3.63E-04 | 0.102686 | 0.004918 | 0.935253 |
| 0.033819 | 0.005214 | 0.137423 | 9.74E-04 | 4.46E-04 | 0.003578 | 0.085033 | 0.027621 | 0.069572 | 0.0269   | 0.045022 | 3.33E-04 | 8.40E-05 | 0.009357 | 4.53E-04 |
| 0.038897 | 0.001379 | 0.068769 | 6.30E-05 | 0.234082 | 0.005503 | 7.60E-05 | 0.035324 | 0.007778 | 0.05503  | 0.00721  | 0.013418 | 4.81E-04 | 0.034236 | 9.87E-04 |
| 0.002531 | 0.044123 | 0.126323 | 0.617275 | 0.008187 | 0.007463 | 0.401095 | 0.005787 | 0.256096 | 0.010268 | 0.237526 | 0.001585 | 0.234457 | 0.003152 | 3.63E-04 |
| 0.021325 | 0.154313 | 0.011939 | 0.008295 | 0.120369 | 0.024983 | 0        | 0.011946 | 0.006094 | 0.002409 | 0.007072 | 0.01149  | 0.290638 | 0.004952 | 0.006097 |
| 0.010884 | 0.062126 | 0.05885  | 0.093903 | 0.072224 | 0.009103 | 0.145912 | 0.004251 | 0.085208 | 0.006017 | 0.041299 | 0.001939 | 0.283938 | 0.001713 | 2.21E-04 |
| 0.00202  | 0.09145  | 0.009438 | 5.72E-04 | 5.91E-04 | 0.013471 | 0        | 0.003193 | 0.01244  | 0.006135 | 0.007088 | 0.003603 | 0.03803  | 0.007118 | 1.43E-04 |
| 0.001238 | 0.114939 | 0.034548 | 0.006699 | 0.008401 | 5.81E-04 | 0.074742 | 4.61E-04 | 0.055787 | 4.23E-04 | 0.04112  | 0.001789 | 1.15E-04 | 6.69E-04 | 0.009838 |
| 0.017078 | 0.006282 | 0.026235 | 0.011658 | 0.025898 | 0.035367 | 0.019922 | 0.02256  | 0.012037 | 0.011855 | 0.017955 | 0.002513 | 0.002489 | 0.019785 | 7.50E-05 |
| 0.004812 | 0.009932 | 0.018549 | 9.54E-04 | 0.010252 | 0.009421 | 1.34E-04 | 0.007395 | 0.002201 | 0.004059 | 0.002881 | 0.004357 | 2.18E-04 | 0.010462 | 2.76E-04 |
| 0        | 0.004336 | 7.70E-05 | 4.59E-04 | 0        | 0        | 7.30E-05 | 1.90E-04 | 0.001424 | 0        | 2.82E-04 | 1.28E-04 | 7.32E-04 | 1.15E-04 | 1.30E-04 |
| 0.001362 | 0.007914 | 0.018716 | 0.004648 | 0.00175  | 0        | 0        | 0.001293 | 0.002976 | 0.001067 | 0.012892 | 3.50E-05 | 9.30E-05 | 9.36E-04 | 3.20E-05 |
| 0.001175 | 3.91E-04 | 0.006963 | 3.60E-05 | 0        | 0.003214 | 0        | 6.06E-04 | 0.015236 | 5.67E-04 | 0.005509 | 1.16E-04 | 8.20E-05 | 2.13E-04 | 6.40E-05 |
| 0.002412 | 0.002301 | 0.005164 | 0.001832 | 0.003191 | 4.26E-04 | 0        | 1.72E-04 | 9.65E-04 | 5.78E-04 | 0.006181 | 1.71E-04 | 1.90E-05 | 9.25E-04 | 2.70E-05 |
| 7.57E-04 | 0.016127 | 0.010182 | 9.10E-05 | 2.86E-04 | 8.65E-04 | 6.80E-05 | 0.001459 | 0.003461 | 7.77E-04 | 0.003837 | 2.21E-04 | 9.70E-05 | 0.001665 | 8.20E-05 |
| 4.14E-04 | 5.03E-04 | 0.027719 | 4.20E-05 | 6.00E-04 | 0        | 0        | 3.41E-04 | 0.024086 | 1.21E-04 | 0.033238 | 0        | 1.60E-05 | 4.38E-04 | 0.012336 |
| 8.50E-04 | 0.00235  | 0.01633  | 0.059748 | 0.004942 | 0.002278 | 0.060744 | 9.00E-04 | 0.014223 | 0.00146  | 0.010636 | 2.53E-04 | 0.018923 | 4.84E-04 | 0        |
| 0.001688 | 0.001707 | 0.002313 | 4.78E-04 | 1.61E-04 | 2.93E-04 | 4.48E-04 | 4.29E-04 | 0.002558 | 6.15E-04 | 0.002359 | 2.82E-04 | 8.50E-05 | 0.001087 | 5.90E-05 |
| 5.12E-04 | 0.007508 | 0.005133 | 0.001235 | 1.51E-04 | 8.51E-04 | 8.30E-05 | 0.009089 | 7.64E-04 | 5.58E-04 | 4.51E-04 | 9.80E-05 | 1.17E-04 | 0.002231 | 8.70E-05 |
| 0.004521 | 0.001644 | 0.01071  | 8.30E-05 | 0.006117 | 0        | 0        | 0.011083 | 0.001153 | 0.004256 | 0.012955 | 2.21E-04 | 1.39E-04 | 3.13E-04 | 5.80E-05 |
| 0        | 2.20E-05 | 0        | 0        | 0        | 0        | 0        | 0        | 0        | 0        | 0        | 0        | 0        | 0        | 0        |
| 0.001743 | 0.008153 | 0.008677 | 0.0044   | 0.025831 | 0.001455 | 0.015027 | 0.001438 | 0.002055 | 6.22E-04 | 0.004346 | 1.04E-04 | 2.10E-05 | 8.03E-04 | 6.50E-05 |
| 3.62E-04 | 1.29E-04 | 3.15E-04 | 0        | 1.43E-04 | 0.001448 | 0        | 1.63E-04 | 9.48E-04 | 0.001047 | 5.50E-05 | 7.11E-04 | 1.59E-04 | 3.33E-04 | 2.30E-05 |
| 0.001592 | 0.00253  | 0.001621 | 3.00E-05 | 0        | 0.006163 | 7.40E-05 | 0.002363 | 6.16E-04 | 0.004457 | 7.66E-04 | 0.003936 | 2.36E-04 | 0.004666 | 2.70E-05 |
| 5.50E-05 | 0.003469 | 7.40E-05 | 0        | 0.005257 | 0        | 0.002829 | 2.53E-04 | 9.90E-05 | 1.91E-04 | 0        | 6.00E-05 | 9.60E-05 | 2.36E-04 | 0        |
| 7.59E-04 | 0.007101 | 0.014511 | 0.004597 | 0.005597 | 5.55E-04 | 0.004827 | 9.00E-05 | 0.01464  | 1.23E-04 | 0.017111 | 8.50E-05 | 0        | 2.23E-04 | 0.01823  |
| 3.09E-04 | 1.22E-04 | 0.010577 | 0        | 0        | 1.42E-04 | 0        | 1.75E-04 | 2.80E-05 | 4.43E-04 | 4.58E-04 | 0        | 0        | 0        | 3.10E-05 |
| 2.99E-04 | 0.003957 | 6.44E-04 | 0.001782 | 0.001354 | 1.42E-04 | 0        | 9.80E-05 | 7.11E-04 | 0        | 6.64E-04 | 5.70E-05 | 3.60E-05 | 0        | 9.00E-05 |
| 0        | 3.00E-05 | 7.80E-05 | 0        | 0        | 0        | 2.11E-04 | 3.20E-04 | 8.24E-04 | 0        | 0.025664 | 0        | 9.30E-05 | 0        | 2.80E-05 |
| 0.002512 | 0.001505 | 0.001052 | 0        | 0        | 0.016702 | 0        | 0.001828 | 1.20E-04 | 0.007687 | 3.01E-04 | 0.002562 | 1.32E-04 | 0.009591 | 0        |
| 0        | 3.00E-04 | 0.010976 | 0        | 1.60E-04 | 0        | 0        | 1.60E-04 | 0.001027 | 8.50E-05 | 0.002712 | 0        | 0        | 0        | 0        |
| 2.10E-04 | 0.001986 | 3.30E-04 | 1.11E-04 | 0        | 7.19E-04 | 8.21E-04 | 4.33E-04 | 2.80E-04 | 5.80E-05 | 9.42E-04 | 0        | 3.60E-05 | 2.34E-04 | 0        |
| 1.89E-04 | 6.60E-04 | 0        | 1.65E-04 | 2.96E-04 | 2.85E-04 | 0.002151 | 2.73E-04 | 1.40E-04 | 1.14E-04 | 2.10E-04 | 4.86E-04 | 1.29E-04 | 0        | 0        |
| 0.001165 | 0.001212 | 0        | 4.00E-05 | 0.001497 | 0        | 0        | 0        | 2.56E-04 | 6.10E-05 | 0        | 1.19E-04 | 1.90E-05 | 1.18E-04 | 0        |
| 4.38E-04 | 2.20E-05 | 7.38E-04 | 0        | 2.91E-04 | 8.46E-04 | 0        | 2.64E-04 | 5.02E-04 | 0        | 5.35E-04 | 5.40E-05 | 2.30E-05 | 0        | 0        |
| 1.77E-04 | 0        | 1.50E-04 | 0        | 1.51E-04 | 0.001417 | 0        | 8.70E-04 | 1.76E-04 | 6.10E-05 | 0        | 0        | 0        | 0        | 0        |
| 0        | 2.72E-04 | 0        | 0        | 0        | 0        | 0        | 0        | 1.29E-04 | 6.30E-05 | 0        | 0        | 4.00E-05 | 0        | 0        |
| 2.39E-04 | 3.34E-04 | 0.006377 | 0        | 0.001024 | 1.50E-04 | 6.50E-05 | 3.43E-04 | 0.001328 | 0        | 0.004154 | 9.70E-05 | 0        | 2.25E-04 | 0.003511 |
| 0        | 3.24E-04 | 0        | 3.80E-05 | 0        | 0        | 0        | 0        | 1.08E-04 | 0        | 1.22E-04 | 0        | 0        | 0        | 0        |
| 4.35E-04 | 0.003249 | 0.00374  | 0.001602 | 0.002669 | 1.39E-04 | 0.001698 | 1.77E-04 | 0.005091 | 0        | 0.005384 | 5.60E-05 | 0        | 0        | 0.004459 |
| 0        | 2.35E-04 | 0        | 0        | 0        | 0        | 0        | 0        | 1.08E-04 | 0        | 0        | 0        | 3.10E-05 | 0        | 3.10E-05 |
| 5.39E-04 | 1.11E-04 | 8.10E-05 | 0        | 0        | 0.008257 | 0        | 5.34E-04 | 2.50E-05 | 1.89E-04 | 1.73E-04 | 0.001735 | 3.40E-05 | 0.002509 | 4.20E-05 |
| 3.65E-04 | 0        | 6.78E-04 | 0        | 0        | 0        | 0        | 0.001079 | 2.42E-04 | 8.58E-04 | 2.30E-04 | 0        | 1.80E-05 | 1.13E-04 | 0        |
| 0        | 0        | 0        | 0        | 0        | 0        | 0        | 0        | 0        | 0        | 0        | 0        | 5.10E-05 | 0        | 0        |
| 0        | 0        | 4.73E-04 | 0        | 1.52E-04 | 0        | 0        | 0        | 4.60E-05 | 5.80E-05 | 5.63E-04 | 0        | 3.00E-05 | 0        | 0        |
| 6.30E-05 | 0        | 4.04E-04 | 0        | 0        | 0        | 0        | 9.60E-05 | 1.25E-04 | 0        | 0.00139  | 0        | 0        | 0        | 0        |
| 0        | 0        | 0        | 0        | 0        | 0        | 0        | 0        | 0        | 0        | 0        | 0        | 0        | 0        | 0        |
| 0        | 1.32E-04 | 0        | 0        | 0        | 0        | 0        | 0        | 0        | 0        | 1.77E-04 | 0        | 0        | 0        | 0        |
| 0.002958 | 0.015612 | 0.018186 | 0.002225 | 0.006493 | 0.003033 | 0.00449  | 0.006326 | 0.011009 | 0.001947 | 0.016822 | 3.71E-04 | 0.002129 | 0.002234 | 0.005625 |

| CPR01    | CPR05    | CPR07    | CPR21    | CPR06    | CPR17    | CPR08    | CPR10    | CPR02    | CPR16    | CPR13    | CPR12    | CPR14    | CPR15    | CPR03    |
|----------|----------|----------|----------|----------|----------|----------|----------|----------|----------|----------|----------|----------|----------|----------|
| 0.859691 | 0.394304 | 0.344341 | 0.281651 | 0.190614 | 0.176981 | 0.175981 | 0.172182 | 0.137239 | 0.126158 | 0.116733 | 0.112791 | 0.090085 | 0.076197 | 0.063577 |
| 1.87E-04 | 0.003506 | 0.104226 | 0.248898 | 1.61E-04 | 0.001018 | 0.318243 | 0.242124 | 0.168426 | 0.179188 | 5.46E-04 | 0.091159 | 0.12162  | 0.254639 | 0.275249 |
| 0.064986 | 0.207846 | 0.18201  | 0.222152 | 0.186187 | 0.240029 | 0.156615 | 0.16181  | 0.128175 | 0.126043 | 0.100263 | 0.258537 | 0.149375 | 0.216779 | 0.05244  |
| 0.002237 | 0.016548 | 0.005555 | 0.018409 | 0.038783 | 0.032257 | 0.015135 | 0.023861 | 0.019023 | 0.005941 | 0.00904  | 0.029016 | 0.008393 | 0.046599 | 0.011463 |
| 0.015797 | 9.10E-05 | 0.029555 | 0.008518 | 1.25E-04 | 0.022771 | 4.82E-04 | 0.0034   | 0.040436 | 0.006634 | 0.098177 | 0.001587 | 0.102211 | 0.004349 | 0.108438 |
| 0.001837 | 0.094914 | 0.020395 | 0.0536   | 0.059812 | 0.080776 | 0.055519 | 0.160278 | 0.314312 | 0.006511 | 0.411022 | 0.269769 | 0.166301 | 0.074545 | 0.267295 |
| 0        | 0.011578 | 0.024274 | 0.002684 | 0.090469 | 0.025429 | 0.025178 | 0.019446 | 0.016859 | 0.01208  | 0.038509 | 0.0899   | 0.010003 | 0.006482 | 1.96E-04 |
| 0.011832 | 0.061682 | 0.199851 | 0.079895 | 0.162479 | 0.21077  | 0.069165 | 0.042462 | 0.015775 | 0.426488 | 0.060816 | 0.001411 | 0.169572 | 0.155668 | 0.051382 |
| 0.008357 | 9.55E-04 | 0.001263 | 3.75E-04 | 0.002016 | 0.001341 | 0.002622 | 0.016119 | 0.011885 | 5.73E-04 | 0.002727 | 0.022855 | 0.022414 | 6.52E-04 | 0        |
| 1.32E-04 | 0.078755 | 0.018059 | 0.022346 | 0.123614 | 0.039879 | 0.013186 | 0.035725 | 0.001069 | 0.006938 | 0.047322 | 0        | 0.010215 | 0.020097 | 0.008063 |
| 3.10E-05 | 0.003683 | 0.003747 | 0.002417 | 0.044745 | 0.006328 | 0.006594 | 0.005016 | 0.003406 | 0.002384 | 0.002597 | 0.017492 | 0.003282 | 0.021972 | 0.002994 |
| 5.53E-04 | 0.004402 | 0.003241 | 0.001752 | 0.004439 | 0.002195 | 0.001949 | 0.006783 | 0.002369 | 0.001409 | 0.005298 | 0.009068 | 0.005186 | 0.002208 | 0.00157  |
| 0.006522 | 0.011616 | 0        | 0.013941 | 0.010668 | 0.01988  | 0.092122 | 0.010722 | 0.018314 | 0.018468 | 0.00469  | 0.038119 | 0.040657 | 0.009799 | 0.033327 |
| 5.50E-05 | 0        | 0        | 0        | 0        | 0        | 0        | 0        | 0        | 0        | 0        | 0        | 0        | 0        | 0        |
| 0        | 0.002458 | 0        | 0.001231 | 0.001717 | 6.65E-04 | 0.001375 | 0.005616 | 0.007188 | 9.10E-04 | 0.009593 | 0.005885 | 0.001683 | 0.001276 | 0.010613 |
| 5.20E-05 | 0.009659 | 0        | 0        | 0.007166 | 0.007981 | 8.00E-05 | 0.013357 | 0.022229 | 0.010141 | 7.20E-05 | 0.004444 | 0.032243 | 0.027663 | 0.002863 |
| 0.005391 | 0        | 0        | 0.00336  | 0.003541 | 0.003902 | 0.004679 | 0.007688 | 0.007778 | 0.00178  | 0.003538 | 0.003132 | 0.003176 | 0.007218 | 0.006057 |
| 4.10E-05 | 0.012753 | 0.036017 | 0.004676 | 0.011177 | 0.006031 | 0.003851 | 0.008098 | 0        | 0.005701 | 0.003209 | 0        | 0.008021 | 0.009288 | 0.004718 |
| 3.20E-05 | 0.002093 | 1.33E-04 | 1.80E-04 | 0.003985 | 0.001639 | 8.70E-05 | 0.004561 | 0.001596 | 2.96E-04 | 0.004897 | 0        | 2.56E-04 | 0.003547 | 0.001692 |
| 2.30E-05 | 1.48E-04 | 6.05E-04 | 3.00E-05 | 0.001308 | 1.19E-04 | 7.22E-04 | 0.001416 | 3.70E-04 | 2.11E-04 | 1.85E-04 | 0.004121 | 4.72E-04 | 3.90E-05 | 0        |
| 2.10E-05 | 8.43E-04 | 0.007936 | 0.005014 | 6.29E-04 | 0.00468  | 0.001286 | 0.006678 | 0.009684 | 0.002437 | 0.001453 | 0.001116 | 0.002099 | 0.002094 | 0.001681 |
| 0.001872 | 3.30E-04 | 0.013361 | 0.002444 | 0.001108 | 0.034855 | 0.00727  | 0.004584 | 0.030839 | 3.28E-04 | 0.022096 | 0.001249 | 0.005775 | 0.004932 | 0.060698 |
| 2.10E-04 | 0.009876 | 0        | 0.001139 | 0.00993  | 0.021323 | 2.56E-04 | 0.007502 | 0        | 0.004245 | 0.024038 | 0        | 0.00334  | 0.012402 | 0.005626 |
| 0        | 0        | 0        | 0        | 0        | 0        | 0        | 0        | 0        | 0        | 0        | 0        | 0        | 0        | 0        |
| 3.41E-04 | 0.001545 | 3.40E-04 | 0.001031 | 0.002914 | 0.00117  | 0.00128  | 0.001501 | 0.001331 | 6.46E-04 | 2.36E-04 | 0.003701 | 0.001384 | 0.001905 | 4.10E-04 |
| 0.002651 | 0.017225 | 0        | 0.007028 | 0.008554 | 0.008718 | 0.006803 | 0.012919 | 0.021609 | 0.008388 | 0.007738 | 0.008522 | 0.010254 | 0.003534 | 0.01396  |
| 0        | 4.18E-04 | 0.001673 | 0.002567 | 2.92E-04 | 1.33E-04 | 0.001894 | 0.003781 | 1.56E-04 | 0.001418 | 0        | 0        | 0.001012 | 0.002095 | 8.76E-04 |
| 0.005151 | 0.004057 | 0        | 0.003788 | 0.018867 | 0.009261 | 0.009677 | 3.74E-04 | 0.001295 | 0.014358 | 0        | 0.006843 | 0.00269  | 0.014027 | 0        |
| 0        | 1.33E-04 | 4.50E-05 | 1.50E-04 | 0.001386 | 1.89E-04 | 2.98E-04 | 2.60E-04 | 2.94E-04 | 5.00E-05 | 4.50E-05 | 7.07E-04 | 6.20E-05 | 9.99E-04 | 1.78E-04 |
| 0        | 0        | 0        | 0        | 0        | 9.18E-04 | 0.001949 | 0        | 0        | 2.72E-04 | 0.001577 | 0        | 0        | 9.40E-05 | 0        |
| 0.001676 | 2.22E-04 | 0        | 1.68E-04 | 0.001699 | 4.45E-04 | 9.00E-05 | 0.001917 | 9.62E-04 | 2.54E-04 | 1.75E-04 | 0.002251 | 7.37E-04 | 1.06E-04 | 0        |
| 0        | 0        | 0        | 1.95E-04 | 0        | 0        | 7.21E-04 | 0        | 2.30E-05 | 0.008129 | 0        | 1.59E-04 | 0        | 3.64E-04 | 0        |
| 0        | 8.70E-05 | 3.39E-04 | 1.88E-04 | 0        | 0        | 5.70E-04 | 5.37E-04 | 0        | 1.15E-04 | 0        | 0        | 3.27E-04 | 5.79E-04 | 1.37E-04 |
| 5.50E-05 | 0        | 5.24E-04 | 1.69E-04 | 0        | 1.25E-04 | 4.60E-05 | 0.008946 | 0        | 0        | 0.003161 | 0        | 0        | 6.74E-04 | 0.001584 |
| 0.003436 | 0.005142 | 0        | 7.90E-05 | 2.99E-04 | 0        | 0.002282 | 3.75E-04 | 0.001519 | 0.001643 | 7.20E-05 | 2.99E-04 | 0.006737 | 2.24E-04 | 8.50E-05 |
| 0.002374 | 0.009207 | 3.90E-05 | 0.005588 | 0.003893 | 0.009229 | 0.008855 | 0.003881 | 0.002151 | 0.002501 | 0.00567  | 0.004376 | 0.002818 | 0.007932 | 0.002235 |
| 3.17E-04 | 0        | 0        | 2.33E-04 | 0        | 0.007168 | 0.003339 | 0        | 0        | 0        | 0        | 0.00203  | 0.002032 | 0.001297 | 9.80E-04 |
| 0        | 0.008023 | 3.80E-05 | 0        | 3.23E-04 | 0.012184 | 5.07E-04 | 0        | 0.003467 | 0.001391 | 2.80E-04 | 0        | 0.006708 | 0        | 3.70E-04 |
| 0        | 0.010079 | 0        | 0        | 0        | 0        | 0        | 0        | 0        | 0.010846 | 0        | 0        | 0.002522 | 6.80E-05 | 5.20E-05 |
| 0        | 0        | 0        | 0        | 0        | 0        | 0        | 0        | 0        | 0        | 0        | 0        | 0        | 0        | 0        |
| 0        | 2.68E-04 | 1.16E-04 | 0        | 5.62E-04 | 1.84E-04 | 1.24E-04 | 4.56E-04 | 3.85E-04 | 1.09E-04 | 5.46E-04 | 3.76E-04 | 2.36E-04 | 2.44E-04 | 1.26E-04 |
| 0        | 0        | 0        | 0        | 0        | 0        | 0        | 0        | 0        | 0        | 0        | 0        | 0        | 0        | 0        |
| 0        | 1.47E-04 | 0        | 4.20E-05 | 1.57E-04 | 0        | 8.40E-05 | 4.50E-05 | 2.80E-05 | 5.40E-05 | 7.20E-05 | 4.43E-04 | 3.80E-05 | 2.30E-04 | 2.00E-05 |
| 0        | 0        | 0        | 0        | 0        | 0        | 0        | 0        | 0        | 0        | 0        | 0        | 0        | 0        | 0        |
| 5.70E-05 | 3.70E-05 | 1.07E-04 | 2.18E-04 | 3.70E-05 | 0.001317 | 2.45E-04 | 3.42E-04 | 0.00102  | 1.01E-04 | 3.20E-05 | 6.70E-05 | 3.30E-04 | 6.85E-04 | 1.75E-04 |
| 0        | 0        | 0        | 0        | 4.90E-05 | 6.60E-05 | 1.27E-04 | 8.87E-04 | 0        | 0        | 1.87E-04 | 0        | 2.80E-05 | 0        | 0.001202 |
| 0        | 0        | 0        | 0        | 0        | 0        | 0        | 0        | 0        | 0        | 0        | 0        | 0        | 0        | 0        |
| 2.80E-05 | 1.28E-04 | 0        | 2.40E-05 | 0        | 3.35E-04 | 5.40E-05 | 3.63E-04 | 0.001434 | 0        | 1.13E-04 | 1.42E-04 | 3.70E-05 | 0        | 0.001118 |
| 0        | 0.001719 | 0        | 1.50E-04 | 5.58E-04 | 3.30E-05 | 9.64E-04 | 0        | 0        | 2.12E-04 | 5.66E-04 | 0        | 0        | 2.23E-04 | 0        |
| 0        | 3.90E-05 | 0        | 0        | 0        | 0        | 0        | 0        | 3.40E-05 | 0        | 0        | 0        | 0        | 0        | 0        |
| 0        | 0        | 0        | 0        | 0        | 0        | 0        | 0        | 0        | 0        | 0        | 0        | 0        | 0        | 0        |
| 0.004055 | 0.013484 | 0.00221  | 0.00367  | 0.005737 | 0.007676 | 0.007694 | 0.003988 | 0.00732  | 0.004649 | 0.012709 | 0.008433 | 0.005669 | 0.006275 | 0.00655  |

| CPR19    | CPR18    | CPR22    | CPR04    | CPR20    | CPR11    | CPR09    | HC119    | HC121    | HC061    | HC064    | HC020    | HC056    | HC050    | HC036    |
|----------|----------|----------|----------|----------|----------|----------|----------|----------|----------|----------|----------|----------|----------|----------|
| 0.061421 | 0.054796 | 0.044236 | 0.034205 | 0.032507 | 0.025274 | 0.025167 | 0.752069 | 0.730112 | 0.646318 | 0.60942  | 0.59542  | 0.560912 | 0.543437 | 0.52084  |
| 0.318031 | 0.33993  | 0.622356 | 0.133048 | 0.451468 | 0.535411 | 0.552217 | 0.002305 | 0.008102 | 0.002142 | 0.04817  | 0.033132 | 0.03696  | 0.017    | 1.08E-04 |
| 0.075712 | 0.111487 | 0.039328 | 0.19826  | 0.051899 | 0.07841  | 0.090296 | 0.054645 | 0.055585 | 0.072961 | 0.086192 | 0.021996 | 0.088901 | 0.097623 | 0.160071 |
| 0.004727 | 0.022963 | 0.018973 | 0.058551 | 0.044528 | 0.011135 | 0.045781 | 0.054313 | 0.090236 | 0.045333 | 0.058071 | 0.151796 | 0.069132 | 0.02615  | 0.12734  |
| 0.118887 | 0.010381 | 0.010424 | 0.029431 | 0.074939 | 0.043887 | 1.81E-04 | 0.00166  | 0.00343  | 1.97E-04 | 0.005206 | 0.02269  | 0.052967 | 8.88E-04 | 6.70E-05 |
| 0.15976  | 0.212172 | 0.09877  | 0.272926 | 0.164308 | 0.164903 | 0.039946 | 0.004232 | 0.006527 | 0.009574 | 9.42E-04 | 0.005692 | 0.036082 | 0.063305 | 1.55E-04 |
| 0.001152 | 6.96E-04 | 0.01332  | 0.031082 | 0.008245 | 0.049978 | 0.064433 | 0.005198 | 0.012985 | 0.065158 | 0.03182  | 0.031495 | 0.033114 | 0.060093 | 0.010921 |
| 0.08001  | 0.087971 | 0.017727 | 0.041478 | 0.021027 | 0.016401 | 0.020145 | 0.009447 | 0.011581 | 0.003889 | 1.00E-04 | 0.005774 | 0.012536 | 0.007829 | 0.00152  |
| 5.40E-05 | 3.40E-05 | 0.006146 | 7.88E-04 | 0        | 0.008476 | 7.17E-04 | 0.035378 | 0.026483 | 0.063848 | 0.101043 | 0.009956 | 0.010914 | 0.064785 | 0.103662 |
| 0.020516 | 0.028384 | 0.020918 | 0.020275 | 0.02511  | 0.013321 | 0.100448 | 0.00396  | 0.010474 | 0.005301 | 0.006332 | 7.29E-04 | 0.004767 | 0.025494 | 9.17E-04 |
| 0.0024   | 0.004323 | 0.014056 | 0.033504 | 0.009244 | 0.005352 | 0.011401 | 0.023099 | 0.001268 | 0.011262 | 0.008833 | 7.39E-04 | 0.003777 | 0.003095 | 0.002501 |
| 0.002422 | 0.002539 | 0.002807 | 0.005257 | 0.002813 | 0.004343 | 0.004515 | 0.003508 | 0.006007 | 0.008339 | 0.012523 | 0.006969 | 0.00893  | 0.007694 | 0.004687 |
| 0.025414 | 0.02235  | 0.007454 | 0.014913 | 0.012341 | 0.005079 | 0.005922 | 0.002552 | 0.002496 | 0.005943 | 9.61E-04 | 0.00484  | 0.005633 | 0.006853 | 0.002346 |
| 0        | 0        | 0        | 0        | 0        | 0        | 0        | 1.08E-04 | 1.21E-04 | 1.41E-04 | 3.30E-05 | 0        | 5.70E-05 | 0        | 0        |
| 0.011156 | 0.00392  | 0.008567 | 0.003781 | 0.004253 | 0.002465 | 0.003861 | 0.001213 | 3.88E-04 | 0.001984 | 5.46E-04 | 0.031553 | 0.008199 | 0.004751 | 6.00E-05 |
| 2.72E-04 | 0.0026   | 8.10E-04 | 0.010227 | 2.90E-05 | 0.001412 | 0        | 0.008245 | 0.008768 | 0.002058 | 0.005054 | 0.004443 | 0.005547 | 0.002001 | 0.018625 |
| 0.005463 | 0.00689  | 0.013996 | 0.004771 | 0.004805 | 0.001828 | 0.001139 | 0.002674 | 0.008949 | 0.006398 | 3.97E-04 | 0.047703 | 0.022046 | 0.016115 | 0.005183 |
| 0.014665 | 0.0099   | 0.010406 | 0.007613 | 0.006095 | 7.65E-04 | 0.001941 | 0.001406 | 0.001786 | 0.003352 | 2.79E-04 | 0.003639 | 0.005895 | 0.014    | 0.004027 |
| 6.70E-05 | 0.003843 | 0.004054 | 0.006219 | 0.001914 | 0.001872 | 0.004763 | 0.001181 | 3.83E-04 | 0.001609 | 0.001078 | 0.001147 | 0.001725 | 0.001519 | 1.06E-04 |
| 0        | 0        | 4.20E-05 | 3.71E-04 | 2.80E-05 | 0.001407 | 2.71E-04 | 6.61E-04 | 0.001475 | 0.012329 | 0.00907  | 0.001484 | 0.00154  | 0.007096 | 0.002215 |
| 0.004996 | 0.002664 | 0.001762 | 0.002858 | 0.002524 | 0.002246 | 2.64E-04 | 0.006637 | 0.002753 | 0.004994 | 0.001381 | 0.003362 | 0.008621 | 0.002333 | 0.009296 |
| 0.034256 | 0.033403 | 0.002723 | 0.014116 | 0.045468 | 0.011146 | 4.25E-04 | 1.56E-04 | 3.90E-05 | 0        | 1.05E-04 | 5.20E-05 | 5.31E-04 | 8.60E-05 | 3.60E-05 |
| 6.40E-04 | 0.011299 | 0.018048 | 0.00808  | 0.00414  | 0.001242 | 1.42E-04 | 5.72E-04 | 2.46E-04 | 0.009155 | 0        | 0.003882 | 8.49E-04 | 0.004751 | 0.002676 |
| 0        | 0        | 0        | 0        | 0        | 0        | 0        | 0        | 1.60E-05 | 0        | 0        | 0        | 0        | 0.006181 | 0.002292 |
| 4.60E-04 | 7.96E-04 | 0.000649 | 0.002572 | 5.63E-04 | 3.26E-04 | 7.85E-04 | 0.003993 | 0.002427 | 0.005653 | 0.004393 | 0.002098 | 0.004279 | 0.002297 | 0.003838 |
| 0.02248  | 0.001579 | 0.002004 | 0.008768 | 0.013197 | 0.001732 | 0.002637 | 0.002978 | 0.001896 | 1.27E-04 | 1.02E-04 | 1.67E-04 | 0.001061 | 0.001825 | 5.27E-04 |
| 0.002915 | 0.003677 | 0.00567  | 0.001406 | 0.005712 | 0.003088 | 0.012952 | 4.90E-05 | 2.09E-04 | 1.37E-04 | 0.001121 | 9.00E-05 | 6.74E-04 | 5.13E-04 | 0        |
| 1.61E-04 | 1.02E-04 | 0        | 2.83E-04 | 3.30E-04 | 0        | 1.21E-04 | 1.53E-04 | 1.03E-04 | 0        | 8.60E-05 | 0        | 8.40E-05 | 7.85E-04 | 5.17E-04 |
| 0        | 3.60E-05 | 7.00E-05 | 0.001285 | 7.25E-04 | 1.75E-04 | 5.07E-04 | 0.004246 | 5.03E-04 | 0.00296  | 0.004008 | 4.32E-04 | 0.001596 | 5.89E-04 | 9.40E-04 |
| 0.006979 | 0        | 0        | 1.31E-04 | 0.001187 | 7.30E-05 | 0        | 9.30E-05 | 1.10E-05 | 0        | 6.80E-05 | 0        | 0.003316 | 4.14E-04 | 0        |
| 0        | 0        | 3.67E-04 | 9.20E-05 | 0        | 3.34E-04 | 3.00E-04 | 0.006375 | 0.002581 | 0.005148 | 2.00E-04 | 8.90E-05 | 3.66E-04 | 0.003256 | 0.007212 |
| 2.10E-05 | 0        | 0        | 0.004957 | 0        | 0        | 0        | 5.40E-05 | 1.90E-05 | 0        | 7.20E-05 | 0        | 7.90E-05 | 0        | 0        |
| 1.65E-04 | 0.001304 | 0.001774 | 3.19E-04 | 0.001035 | 9.06E-04 | 0.004354 | 0        | 1.34E-04 | 0        | 3.14E-04 | 0        | 1.74E-04 | 3.65E-04 | 0        |
| 5.32E-04 | 0.00183  | 0        | 0.018417 | 0        | 0        | 7.40E-05 | 8.30E-05 | 2.20E-05 | 0        | 0        | 1.43E-04 | 1.70E-04 | 0.00102  | 0        |
| 5.90E-05 | 2.93E-04 | 7.63E-04 | 1.03E-04 | 0        | 0        | 0        | 1.26E-04 | 1.11E-04 | 2.24E-04 | 3.80E-05 | 2.01E-04 | 7.80E-05 | 1.21E-04 | 0.001717 |
| 0.003515 | 0.004687 | 5.67E-04 | 9.66E-04 | 0.001316 | 0.001782 | 7.60E-05 | 1.78E-04 | 2.30E-04 | 1.00E-04 | 0        | 1.63E-04 | 1.50E-05 | 0        | 2.54E-04 |
| 0.003358 | 0        | 0        | 0.003714 | 0.001668 | 4.40E-05 | 7.70E-05 | 0        | 0        | 0        | 3.80E-05 | 3.86E-04 | 1.48E-04 | 3.97E-04 | 0        |
| 1.21E-04 | 9.02E-04 | 1.38E-04 | 0.00186  | 0.001205 | 7.30E-04 | 0        | 2.20E-04 | 2.80E-04 | 4.00E-05 | 0        | 6.30E-04 | 4.64E-04 | 3.03E-04 | 0.002055 |
| 0        | 0.002053 | 3.50E-05 | 0        | 0        | 0        | 7.20E-05 | 4.25E-04 | 2.80E-05 | 1.44E-04 | 0        | 0        | 7.60E-05 | 0        | 9.40E-05 |
| 0        | 0        | 0        | 0        | 0        | 0        | 0        | 0        | 4.40E-05 | 0        | 3.40E-05 | 0        | 0        | 0        | 0        |
| 8.00E-05 | 4.01E-04 | 3.39E-04 | 9.39E-04 | 8.80E-05 | 2.29E-04 | 2.48E-04 | 3.40E-04 | 1.27E-04 | 6.38E-04 | 5.27E-04 | 1.10E-04 | 2.61E-04 | 4.33E-04 | 0        |
| 0        | 0        | 0        | 0        | 0        | 0        | 0        | 0        | 0        | 0        | 0        | 0        | 0        | 0        | 0        |
| 2.20E-05 | 2.90E-05 | 2.46E-04 | 4.27E-04 | 1.80E-04 | 3.70E-05 | 1.65E-04 | 0.001114 | 7.10E-05 | 5.24E-04 | 1.88E-04 | 7.50E-05 | 3.49E-04 | 0        | 7.30E-05 |
| 0        | 0        | 0        | 0        | 0        | 0        | 0        | 0        | 2.10E-05 | 3.40E-05 | 0        | 0        | 0        | 0        | 0        |
| 1.82E-04 | 1.85E-04 | 2.42E-04 | 1.29E-04 | 1.33E-04 | 4.50E-05 | 5.55E-04 | 0        | 2.30E-05 | 0        | 6.40E-05 | 0        | 1.14E-04 | 0        | 0        |
| 4.64E-04 | 0.001555 | 5.68E-04 | 3.52E-04 | 0        | 9.03E-04 | 0        | 2.50E-05 | 3.30E-05 | 1.82E-04 | 0        | 9.20E-05 | 4.90E-04 | 1.53E-04 | 0        |
| 0        | 0        | 0        | 0        | 0        | 0        | 6.90E-05 | 1.72E-04 | 0        | 0        | 0        | 0        | 0        | 0        | 8.30E-05 |
| 1.24E-04 | 2.53E-04 | 0        | 6.70E-04 | 1.90E-05 | 1.53E-04 | 3.60E-05 | 2.20E-05 | 0        | 3.40E-05 | 0        | 2.40E-05 | 1.06E-04 | 1.30E-04 | 0        |
| 0        | 3.50E-05 | 3.70E-05 | 8.60E-05 | 0        | 3.70E-05 | 2.70E-05 | 0        | 0        | 0        | 4.00E-05 | 0        | 1.10E-04 | 5.17E-04 | 3.20E-05 |
| 0        | 0        | 8.60E-05 | 0        | 0        | 0        | 4.60E-05 | 0        | 0        | 0        | 0        | 0        | 0        | 0        | 0        |
| 0        | 0        | 0        | 0        | 0        | 0        | 0        | 0        | 0        | 0        | 0        | 0        | 0        | 0        | 0        |
| 0.016341 | 0.007738 | 0.009522 | 0.02077  | 0.004957 | 0.003053 | 0.002924 | 0.004135 | 9.17E-04 | 0.00177  | 0.001151 | 0.006807 | 0.006355 | 0.003803 | 0.003007 |

|          |          |          |          |          |          |          |          |          |          |          |          |          |          |          |
|----------|----------|----------|----------|----------|----------|----------|----------|----------|----------|----------|----------|----------|----------|----------|
| HC043    | HC013    | HC091    | HC069    | HC118    | HC046    | HC115    | HC122    | HC137    | HC003    | HC039    | HC128    | HC099    | HC092    | HC132    |
| 0.518021 | 0.517551 | 0.508667 | 0.482231 | 0.478289 | 0.471949 | 0.454549 | 0.447017 | 0.440165 | 0.42543  | 0.424127 | 0.414444 | 0.405929 | 0.398522 | 0.395827 |
| 0.011627 | 0.007408 | 0.098176 | 0.021595 | 0.083172 | 0.011685 | 0.09109  | 0.055225 | 0.027493 | 0.015509 | 0.00463  | 0.002811 | 0.070282 | 0.012452 | 2.08E-04 |
| 0.108511 | 0.164087 | 0.152471 | 0.150273 | 0.078965 | 0.180172 | 0.119998 | 0.174702 | 0.108579 | 0.053133 | 0.099242 | 0.062625 | 0.041749 | 0.073783 | 0.054412 |
| 0.077192 | 0.08799  | 0.056269 | 0.111724 | 0.026791 | 0.112643 | 0.007185 | 0.060467 | 0.009419 | 0.100177 | 0.024321 | 0.060736 | 0.239241 | 0.064605 | 0.364199 |
| 6.02E-04 | 0.001885 | 0.001262 | 3.18E-04 | 0.019793 | 0.00315  | 0.005569 | 0.005506 | 0.024766 | 0.033722 | 0.002445 | 0.248386 | 0.047761 | 0.004839 | 5.93E-04 |
| 0.009576 | 0.004144 | 0.01342  | 0.003805 | 0.045247 | 0.010377 | 0.023758 | 0.033621 | 0.132475 | 0.014898 | 0.031671 | 6.48E-04 | 0.008625 | 0.020633 | 4.18E-04 |
| 0.065786 | 0.034177 | 0.007136 | 0.004655 | 0.024805 | 0.032895 | 0.004406 | 0.029808 | 0.00329  | 0.172849 | 4.94E-04 | 0.044448 | 0.029962 | 0.060534 | 0.05445  |
| 0.019392 | 0.049831 | 0.001885 | 0.089716 | 0.080161 | 0.03979  | 0.138648 | 0.04928  | 0.075369 | 0.003096 | 0.219002 | 3.73E-04 | 0.003388 | 0.006355 | 3.65E-04 |
| 0.060276 | 0.038968 | 0.045388 | 0.056519 | 0.023656 | 0.053849 | 0.021882 | 0.048648 | 0.043318 | 0.07811  | 0.024312 | 0.009881 | 0.058293 | 0.098223 | 0.058367 |
| 0.015698 | 0.010423 | 0.044457 | 0.005549 | 0.039166 | 0.003122 | 0.010567 | 0.001525 | 0.006771 | 0.005562 | 6.60E-04 | 0.053089 | 0.013447 | 0.02535  | 0.00266  |
| 0.010828 | 0.005637 | 0.001608 | 0.001705 | 0.006673 | 0.001874 | 0.008412 | 0.004728 | 0.002137 | 0.006503 | 3.54E-04 | 0.007634 | 0.002565 | 0.023741 | 0.009902 |
| 0.006504 | 0.002779 | 0.013319 | 0.004298 | 0.018079 | 0.011088 | 0.004765 | 0.009505 | 0.003593 | 0.013377 | 0.004542 | 0.018562 | 0.026484 | 0.005165 | 0.012357 |
| 0.00754  | 0.00634  | 0.003532 | 0.005143 | 0.004243 | 0.003597 | 0.004776 | 0.005892 | 0.007189 | 0.004437 | 0.008944 | 0.004249 | 0.005081 | 0.004859 | 5.64E-04 |
| 0.001386 | 0        | 1.34E-04 | 0        | 5.70E-05 | 7.10E-05 | 0        | 0        | 0        | 2.10E-04 | 1.05E-04 | 2.03E-04 | 0        | 0.002786 | 0        |
| 0.001214 | 0.002558 | 0.011307 | 6.77E-04 | 0.005924 | 0.001316 | 0.002872 | 0.003825 | 0.005453 | 0.006512 | 0.009018 | 0.017259 | 0.002205 | 0.007031 | 2.26E-04 |
| 0.027412 | 0.003945 | 0.002937 | 0.008924 | 0.006807 | 0.02181  | 0.044947 | 0.007238 | 0.017069 | 0.011314 | 0.022078 | 0.003022 | 9.07E-04 | 0.031768 | 0.00246  |
| 0.005609 | 0.006173 | 0.005756 | 0.007574 | 0.004694 | 0.006928 | 4.86E-04 | 0.017161 | 0.018079 | 0.006497 | 0.007757 | 0.010652 | 0.004394 | 0.009445 | 0.002899 |
| 0.001494 | 0.004292 | 0.00292  | 0.004171 | 0.003248 | 0.001943 | 0.002305 | 0.004104 | 0.003182 | 0.002383 | 0.009882 | 0.003847 | 0.002829 | 0.006675 | 0.001511 |
| 8.00E-04 | 7.97E-04 | 0.002505 | 1.93E-04 | 0.002339 | 7.25E-04 | 2.85E-04 | 2.50E-04 | 5.70E-04 | 0.002608 | 2.25E-04 | 0.003056 | 0.001537 | 0.001404 | 6.44E-04 |
| 0.005641 | 0.002388 | 0.001723 | 6.40E-04 | 0.003325 | 0.005768 | 6.66E-04 | 0.004744 | 4.46E-04 | 0.016881 | 1.06E-04 | 0.002572 | 0.009212 | 0.006494 | 0.008112 |
| 0.004685 | 0.005926 | 0.001611 | 0.001152 | 0.006435 | 0.003518 | 0.004366 | 0.005961 | 0.005959 | 0.010534 | 0.002221 | 0.006357 | 0.00196  | 0.009131 | 0.00112  |
| 6.99E-04 | 1.90E-04 | 2.30E-05 | 7.20E-05 | 1.78E-04 | 3.80E-04 | 6.99E-04 | 6.20E-05 | 0.003033 | 1.24E-04 | 3.93E-04 | 7.80E-05 | 0        | 6.14E-04 | 3.30E-05 |
| 5.28E-04 | 8.22E-04 | 0.003495 | 0.002226 | 0.002724 | 0.001991 | 6.48E-04 | 7.22E-04 | 0.002683 | 0.001372 | 0.004749 | 0.002623 | 9.26E-04 | 0.001289 | 3.19E-04 |
| 0        | 0.005339 | 0        | 0.002359 | 0        | 0        | 0.002424 | 0        | 0.005457 | 0        | 3.60E-05 | 0        | 0        | 2.30E-05 | 0        |
| 0.004198 | 0.00284  | 0.003987 | 0.002285 | 0.005091 | 0.005168 | 0.003369 | 0.004797 | 0.001081 | 0.003627 | 0.003024 | 0.00385  | 0.006049 | 0.003086 | 0.008037 |
| 0.012955 | 0.001292 | 4.54E-04 | 0.002398 | 0.005988 | 0.001132 | 0.012131 | 2.13E-04 | 0.006311 | 0.001002 | 0.003472 | 1.92E-04 | 2.84E-04 | 1.67E-04 | 6.60E-05 |
| 7.64E-04 | 1.49E-04 | 0.005869 | 8.10E-05 | 0.005761 | 3.90E-04 | 0.001383 | 1.81E-04 | 4.06E-04 | 1.99E-04 | 0        | 0.001012 | 0.002311 | 4.82E-04 | 0        |
| 0.002477 | 0.008364 | 7.71E-04 | 6.78E-04 | 4.70E-04 | 0.001469 | 0.002205 | 3.87E-04 | 0.00658  | 0        | 0.005341 | 3.80E-05 | 4.40E-05 | 4.63E-04 | 8.80E-05 |
| 0.002919 | 9.79E-04 | 8.38E-04 | 6.18E-04 | 0.002564 | 0.001103 | 4.25E-04 | 0.001225 | 1.91E-04 | 0.00267  | 6.50E-05 | 0.002776 | 0.005958 | 0.003014 | 0.012573 |
| 0        | 0        | 0        | 0        | 9.24E-04 | 6.40E-05 | 8.00E-05 | 0.002299 | 0.003724 | 9.10E-04 | 5.69E-04 | 6.08E-04 | 0        | 0.008592 | 0        |
| 0.005504 | 0.010745 | 0.001744 | 0.008106 | 7.42E-04 | 0.004032 | 0.001326 | 7.72E-04 | 0.005269 | 0.001043 | 0.006649 | 3.58E-04 | 6.18E-04 | 0.009464 | 0.004584 |
| 3.50E-05 | 7.92E-04 | 1.34E-04 | 0        | 0        | 5.24E-04 | 0        | 0.013672 | 3.30E-05 | 1.68E-04 | 0        | 7.90E-05 | 8.90E-05 | 0.088299 | 4.70E-05 |
| 3.41E-04 | 6.30E-05 | 0.001658 | 7.30E-05 | 0.003857 | 0        | 3.80E-04 | 2.20E-05 | 9.60E-05 | 1.13E-04 | 0        | 1.98E-04 | 9.36E-04 | 1.18E-04 | 0        |
| 0        | 1.15E-04 | 2.80E-05 | 0        | 2.19E-04 | 1.76E-04 | 0        | 9.70E-05 | 0.001885 | 8.50E-05 | 1.48E-04 | 0.002248 | 0        | 4.25E-04 | 0        |
| 8.51E-04 | 0.005815 | 1.83E-04 | 0.012674 | 4.19E-04 | 4.97E-04 | 0.012418 | 7.08E-04 | 6.10E-04 | 2.28E-04 | 0.032382 | 4.60E-05 | 3.90E-05 | 4.81E-04 | 3.70E-05 |
| 0.00229  | 1.83E-04 | 0        | 0.001306 | 2.23E-04 | 1.23E-04 | 0.001953 | 2.02E-04 | 3.13E-04 | 0        | 0.00485  | 0        | 7.10E-05 | 1.65E-04 | 7.10E-05 |
| 1.26E-04 | 5.60E-05 | 2.60E-05 | 4.10E-05 | 1.79E-04 | 5.02E-04 | 2.10E-05 | 1.51E-04 | 0.017871 | 1.52E-04 | 0.005642 | 1.16E-04 | 0        | 1.14E-04 | 0        |
| 0.001301 | 2.73E-04 | 1.23E-04 | 3.81E-04 | 3.70E-04 | 9.58E-04 | 0.002279 | 3.82E-04 | 0.002917 | 3.01E-04 | 0.005963 | 1.69E-04 | 0        | 9.35E-04 | 0        |
| 1.92E-04 | 0.001156 | 1.02E-04 | 0.002212 | 9.75E-04 | 2.02E-04 | 0.00192  | 2.90E-05 | 7.10E-05 | 0        | 0.016538 | 0        | 1.31E-04 | 1.02E-04 | 3.80E-05 |
| 5.59E-04 | 0        | 0        | 0        | 0        | 0        | 0        | 4.50E-05 | 0        | 1.37E-04 | 0        | 0        | 0        | 2.18E-04 | 0        |
| 3.27E-04 | 1.43E-04 | 7.61E-04 | 4.30E-05 | 9.47E-04 | 3.20E-04 | 1.11E-04 | 2.09E-04 | 7.50E-05 | 4.35E-04 | 6.40E-05 | 9.37E-04 | 0.001394 | 1.99E-04 | 9.07E-04 |
| 1.93E-04 | 0        | 0        | 0        | 0        | 0        | 0        | 0        | 0        | 8.30E-05 | 0        | 4.80E-05 | 0        | 2.09E-04 | 0        |
| 4.83E-04 | 8.30E-05 | 8.80E-05 | 0        | 6.58E-04 | 1.91E-04 | 9.80E-05 | 4.92E-04 | 0        | 2.31E-04 | 0        | 0.001186 | 6.24E-04 | 2.86E-04 | 0.001139 |
| 1.48E-04 | 0        | 2.70E-05 | 0        | 0        | 0        | 0        | 4.50E-05 | 0        | 4.00E-05 | 0        | 8.80E-05 | 0        | 2.77E-04 | 0        |
| 4.00E-05 | 2.66E-04 | 9.20E-05 | 0        | 6.76E-04 | 2.80E-05 | 2.16E-04 | 6.40E-05 | 1.46E-04 | 0        | 3.30E-05 | 0        | 1.46E-04 | 1.70E-04 | 0        |
| 9.40E-05 | 5.40E-05 | 1.80E-04 | 3.00E-05 | 5.90E-05 | 8.70E-05 | 1.03E-04 | 1.95E-04 | 5.56E-04 | 3.70E-05 | 9.60E-04 | 1.39E-04 | 0        | 4.58E-04 | 0        |
| 0        | 1.79E-04 | 0        | 0        | 0        | 0        | 1.03E-04 | 0        | 6.70E-05 | 0        | 2.50E-05 | 0        | 0        | 1.38E-04 | 0        |
| 2.70E-05 | 2.00E-05 | 1.71E-04 | 0        | 0        | 0        | 1.77E-04 | 0        | 2.00E-04 | 0        | 6.80E-05 | 3.40E-05 | 0        | 5.20E-05 | 0        |
| 0        | 9.20E-05 | 3.36E-04 | 4.60E-05 | 0        | 5.01E-04 | 2.40E-05 | 1.86E-04 | 1.52E-04 | 8.10E-05 | 0        | 1.78E-04 | 7.10E-05 | 1.41E-04 | 0        |
| 2.80E-05 | 7.70E-05 | 5.00E-05 | 0        | 0        | 0        | 0        | 0        | 0        | 0        | 0        | 0        | 0        | 7.00E-05 | 0        |
| 0        | 2.90E-05 | 0        | 0        | 0        | 0        | 0        | 0        | 0        | 0        | 0        | 0        | 0        | 3.00E-05 | 0        |
| 0.003127 | 0.002585 | 0.002377 | 0.003509 | 0.005107 | 0.001892 | 0.003975 | 0.003636 | 0.004951 | 0.00322  | 0.012893 | 0.008145 | 0.004458 | 0.006124 | 7.67E-04 |

|          |          |          |          |          |          |          |          |          |          |          |          |          |          |          |
|----------|----------|----------|----------|----------|----------|----------|----------|----------|----------|----------|----------|----------|----------|----------|
| HC090    | HC030    | HC005    | HC052    | HC067    | HC124    | HC051    | HC053    | HC009    | HC015    | HC144    | HC001    | HC031    | HC066    | HC111    |
| 0.387848 | 0.368177 | 0.366512 | 0.358668 | 0.350808 | 0.345324 | 0.343205 | 0.338455 | 0.326442 | 0.325068 | 0.323613 | 0.321942 | 0.316282 | 0.309196 | 0.303485 |
| 0.28741  | 0.316961 | 0.035055 | 0.029691 | 0.002128 | 3.76E-04 | 0.238204 | 0.01909  | 0.017421 | 0.25132  | 0.033017 | 0.245551 | 0.286073 | 0.100256 | 0.119182 |
| 0.010294 | 0.073772 | 0.057415 | 0.179716 | 0.151006 | 0.148898 | 0.072377 | 0.116226 | 0.031331 | 0.096464 | 0.063881 | 0.039015 | 0.085226 | 0.122826 | 0.105276 |
| 0.018382 | 0.039487 | 0.098458 | 0.053775 | 0.025114 | 0.186607 | 0.080655 | 0.124119 | 0.014086 | 0.025525 | 0.091112 | 0.041922 | 0.01315  | 0.021205 | 0.045001 |
| 0.00695  | 0.026757 | 0.057673 | 0.026249 | 0.01101  | 0.017542 | 0.05279  | 0.004867 | 0.021085 | 0.028175 | 0.006201 | 0.078557 | 0.04052  | 0.04287  | 0.028669 |
| 0.059258 | 0.035349 | 0.011256 | 0.04066  | 0.049568 | 0.001616 | 0.027219 | 0.008368 | 0.090405 | 0.083845 | 0.045811 | 0.03677  | 0.073392 | 0.131902 | 0.097646 |
| 0.033726 | 0.009137 | 0.091035 | 0.029364 | 0.007032 | 0.108076 | 0.014446 | 0.053581 | 0.010996 | 0.024003 | 0.148455 | 0.036637 | 0.005619 | 0.015573 | 0.023237 |
| 0.080086 | 0.006315 | 0.01074  | 0.003086 | 0.197122 | 0.002569 | 0.00405  | 0.05263  | 0.01125  | 0.015983 | 0.013967 | 0.00478  | 0.007449 | 0.019079 | 0.049363 |
| 0.019767 | 0.034532 | 0.102305 | 0.110315 | 0.086608 | 0.048396 | 0.017809 | 0.145015 | 0.026002 | 0.030199 | 0.137716 | 0.013846 | 0.021852 | 0.050763 | 0.03534  |
| 0.009437 | 0.014113 | 0.024459 | 0.053689 | 0.007109 | 5.15E-04 | 0.048859 | 0.011408 | 0.017595 | 0.017778 | 0.012422 | 0.048028 | 0.026024 | 0.027763 | 0.042985 |
| 0.007951 | 0.005955 | 0.009496 | 0.017488 | 0.005288 | 0.024642 | 0.012042 | 0.006081 | 0.008026 | 0.005508 | 0.016438 | 0.007323 | 0.009949 | 0.006304 | 0.003415 |
| 0.010462 | 0.008917 | 0.010892 | 0.006808 | 0.005097 | 0.015875 | 0.017629 | 0.009091 | 9.55E-04 | 0.009062 | 0.011688 | 0.01311  | 0.007233 | 0.005562 | 0.011582 |
| 0.005036 | 0.003581 | 0.006887 | 0.004696 | 0.007217 | 0.00393  | 0.002453 | 0.008277 | 0.007062 | 0.007388 | 0.016884 | 0.007386 | 0.005133 | 0.009435 | 0.015175 |
| 1.34E-04 | 0        | 0.001725 | 0        | 0        | 4.56E-04 | 0        | 0        | 0.254308 | 5.06E-04 | 8.91E-04 | 4.54E-04 | 0        | 0        | 0        |
| 0.004508 | 0.013466 | 0.01322  | 0.005658 | 0.002479 | 0.004888 | 0.010236 | 0.002983 | 0.020603 | 0.008026 | 0.002137 | 0.008135 | 0.0142   | 0.020585 | 0.011789 |
| 0.015129 | 0.0052   | 0.019919 | 0.00446  | 0.022781 | 9.06E-04 | 0.001944 | 0.019881 | 0.004889 | 0.005541 | 0.010434 | 0.010388 | 0.01468  | 0.005791 | 0.018411 |
| 0.005736 | 0.00916  | 0.009425 | 0.008527 | 0.007475 | 0.005764 | 0.008358 | 0.003923 | 0.020864 | 0.011201 | 0.00464  | 0.003293 | 0.016752 | 0.017986 | 0.008243 |
| 0.001834 | 0.003575 | 0.007427 | 0.00781  | 0.004526 | 0.002717 | 0.002705 | 0.007728 | 0.017425 | 0.005846 | 0.0058   | 0.003323 | 0.001457 | 0.018878 | 0.007263 |
| 6.14E-04 | 0.001501 | 0.003333 | 0.002532 | 0.001799 | 0.017385 | 0.002095 | 0.00102  | 0.006146 | 0.002229 | 0.002162 | 0.001628 | 0.001684 | 0.002465 | 0.00179  |
| 0.003985 | 0.001201 | 0.012463 | 0.00358  | 0.001165 | 0.009758 | 9.86E-04 | 0.013372 | 7.50E-05 | 0.001441 | 0.020874 | 0.001802 | 3.63E-04 | 0.001689 | 0.002991 |
| 0.003686 | 0.004894 | 0.020263 | 0.012035 | 0.004156 | 0.002468 | 0.005321 | 0.015649 | 0.006605 | 0.00554  | 0.008024 | 0.008609 | 0.005921 | 0.013139 | 0.014785 |
| 1.70E-05 | 2.58E-04 | 3.70E-04 | 2.72E-04 | 0.001637 | 4.20E-04 | 5.30E-05 | 1.76E-04 | 3.60E-04 | 0.003422 | 5.98E-04 | 0.001915 | 0.001355 | 2.20E-04 | 1.54E-04 |
| 0.001887 | 1.97E-04 | 0.00491  | 0.002377 | 0.005214 | 0.003316 | 2.47E-04 | 0.002364 | 0.005961 | 0.002548 | 0.00231  | 2.10E-04 | 0.001457 | 0.006195 | 0.006873 |
| 0        | 0.004496 | 0        | 0.015207 | 0.004799 | 0        | 0.004018 | 0.005941 | 1.74E-04 | 0.003777 | 0        | 0        | 0.001753 | 0.007804 | 0.003635 |
| 0.001398 | 0.001204 | 0.003298 | 0.003798 | 0.001471 | 0.01238  | 0.004732 | 0.003021 | 2.69E-04 | 0.002442 | 0.005094 | 0.001755 | 0.001877 | 0.003002 | 0.003082 |
| 0.001691 | 0.001019 | 5.41E-04 | 3.72E-04 | 0.003903 | 6.72E-04 | 5.07E-04 | 0.001903 | 8.73E-04 | 0.003906 | 4.28E-04 | 0.002422 | 0.011756 | 0.017659 | 0.001767 |
| 0.002697 | 0.001733 | 0.001299 | 3.70E-04 | 1.30E-04 | 2.50E-05 | 0.008509 | 4.08E-04 | 7.70E-05 | 0.002892 | 6.05E-04 | 0.007096 | 0.003972 | 0.001596 | 0.003706 |
| 1.60E-05 | 2.40E-05 | 1.76E-04 | 2.50E-05 | 0.02219  | 5.50E-05 | 1.01E-04 | 2.99E-04 | 1.82E-04 | 0.001075 | 8.50E-05 | 0        | 5.52E-04 | 1.02E-04 | 3.28E-04 |
| 0.001293 | 5.69E-04 | 0.00219  | 0.001792 | 4.67E-04 | 0.013659 | 0.003386 | 0.001635 | 4.00E-05 | 6.25E-04 | 0.003717 | 0.001155 | 6.82E-04 | 5.34E-04 | 4.62E-04 |
| 0.009025 | 4.42E-04 | 8.63E-04 | 0.001323 | 4.80E-05 | 2.10E-05 | 0.002586 | 2.53E-04 | 0.001673 | 2.48E-04 | 3.94E-04 | 0.017045 | 0.002425 | 3.37E-04 | 0.015034 |
| 0.001882 | 0.002325 | 0.003511 | 0.005946 | 0.004036 | 0.006629 | 9.34E-04 | 0.014008 | 0.002122 | 0.003035 | 0.0029   | 6.52E-04 | 0.003264 | 0.003918 | 0.003894 |
| 2.00E-05 | 2.23E-04 | 0.001121 | 2.02E-04 | 7.70E-05 | 1.11E-04 | 2.90E-05 | 1.83E-04 | 0.001014 | 6.10E-05 | 1.16E-04 | 0.012073 | 0        | 0        | 4.50E-05 |
| 0.001415 | 0.001165 | 3.30E-04 | 2.82E-04 | 0        | 0        | 0.004459 | 7.60E-05 | 4.28E-04 | 0.001445 | 2.29E-04 | 0.00356  | 0.002194 | 4.55E-04 | 0.001691 |
| 0        | 1.18E-04 | 1.87E-04 | 7.95E-04 | 0.001068 | 0        | 9.90E-05 | 8.20E-05 | 0.001379 | 0.00124  | 4.44E-04 | 8.61E-04 | 0.007058 | 7.87E-04 | 4.19E-04 |
| 3.40E-05 | 1.25E-04 | 4.40E-05 | 2.23E-04 | 4.67E-04 | 3.30E-05 | 2.78E-04 | 0.001735 | 2.70E-04 | 5.87E-04 | 2.38E-04 | 9.80E-05 | 9.90E-05 | 2.39E-04 | 0.001245 |
| 1.11E-04 | 1.61E-04 | 1.23E-04 | 9.10E-05 | 1.10E-04 | 2.30E-05 | 5.00E-05 | 4.06E-04 | 5.05E-04 | 3.79E-04 | 3.50E-05 | 9.00E-05 | 4.73E-04 | 4.27E-04 | 1.19E-04 |
| 6.50E-05 | 1.02E-04 | 1.67E-04 | 2.05E-04 | 4.02E-04 | 0        | 0        | 5.20E-05 | 3.30E-05 | 1.42E-04 | 3.88E-04 | 1.62E-04 | 1.62E-04 | 6.30E-04 | 4.04E-04 |
| 2.65E-04 | 8.50E-05 | 5.60E-04 | 2.12E-04 | 8.58E-04 | 8.80E-05 | 1.92E-04 | 5.08E-04 | 7.42E-04 | 0.002039 | 7.34E-04 | 4.00E-04 | 0.001341 | 0.002499 | 0.002141 |
| 3.72E-04 | 1.14E-04 | 8.10E-04 | 2.40E-05 | 0        | 4.46E-04 | 2.60E-05 | 3.24E-04 | 2.99E-04 | 2.22E-04 | 1.05E-04 | 3.80E-05 | 0        | 9.10E-05 | 0.001012 |
| 0        | 0        | 1.25E-04 | 0        | 0        | 0        | 0        | 0        | 0.018708 | 3.00E-05 | 8.60E-05 | 0        | 0        | 0        | 0        |
| 2.21E-04 | 1.33E-04 | 6.66E-04 | 4.57E-04 | 5.87E-04 | 0.005468 | 3.55E-04 | 2.24E-04 | 7.40E-05 | 3.22E-04 | 4.81E-04 | 2.35E-04 | 3.61E-04 | 2.02E-04 | 2.09E-04 |
| 1.90E-05 | 0        | 9.00E-05 | 0        | 0        | 1.20E-04 | 0        | 0        | 0.018881 | 0        | 7.10E-05 | 0        | 0        | 0        | 0        |
| 4.49E-04 | 3.50E-05 | 4.16E-04 | 2.90E-04 | 5.10E-05 | 0.001868 | 6.80E-04 | 5.00E-05 | 4.00E-05 | 7.10E-05 | 6.47E-04 | 3.18E-04 | 1.73E-04 | 1.18E-04 | 8.80E-05 |
| 0        | 0        | 1.69E-04 | 0        | 0        | 8.40E-05 | 0        | 0        | 0.013468 | 1.01E-04 | 6.90E-05 | 0        | 0        | 0        | 0        |
| 8.26E-04 | 0        | 0.001987 | 5.60E-05 | 5.30E-05 | 0        | 1.30E-04 | 2.70E-05 | 4.20E-05 | 3.36E-04 | 7.90E-05 | 5.32E-04 | 6.58E-04 | 5.50E-05 | 7.70E-05 |
| 8.50E-05 | 5.70E-05 | 0        | 1.83E-04 | 1.62E-04 | 0        | 2.81E-04 | 1.43E-04 | 5.03E-04 | 2.28E-04 | 5.60E-05 | 2.37E-04 | 3.61E-04 | 8.55E-04 | 0.001047 |
| 7.30E-05 | 3.61E-04 | 4.40E-05 | 6.73E-04 | 1.95E-04 | 0        | 1.86E-04 | 3.12E-04 | 6.40E-05 | 3.50E-05 | 0        | 4.30E-05 | 2.80E-05 | 4.58E-04 | 2.48E-04 |
| 1.90E-05 | 6.40E-05 | 0        | 2.23E-04 | 9.10E-05 | 0        | 3.00E-05 | 1.90E-05 | 6.39E-04 | 6.30E-05 | 0        | 2.23E-04 | 7.90E-05 | 7.30E-04 | 7.30E-05 |
| 2.20E-05 | 0        | 1.42E-04 | 2.60E-04 | 3.10E-05 | 1.19E-04 | 1.80E-05 | 4.50E-05 | 3.64E-04 | 9.40E-05 | 4.18E-04 | 3.20E-05 | 1.10E-04 | 9.90E-05 | 0        |
| 0        | 2.54E-04 | 0        | 0        | 3.40E-05 | 0        | 0        | 2.10E-05 | 2.00E-05 | 1.18E-04 | 0        | 0        | 0        | 0        | 4.50E-05 |
| 0        | 2.00E-05 | 0        | 0        | 0        | 0        | 0        | 0        | 1.21E-04 | 0        | 0        | 0        | 0        | 0        | 0        |
| 0.003865 | 0.002666 | 0.005903 | 0.005535 | 0.002431 | 0.005755 | 0.004731 | 0.004021 | 0.017104 | 0.007869 | 0.003506 | 0.016349 | 0.004851 | 0.007721 | 0.006574 |

|          |          |          |          |          |          |          |          |          |          |          |          |          |          |          |
|----------|----------|----------|----------|----------|----------|----------|----------|----------|----------|----------|----------|----------|----------|----------|
| HC094    | HC011    | HC073    | HC055    | HC048    | HC107    | HC033    | HC105    | HC136    | HC097    | HC080    | HC044    | HC017    | HC008    | HC116    |
| 0.303482 | 0.297192 | 0.295762 | 0.294527 | 0.293307 | 0.293055 | 0.285431 | 0.282456 | 0.281837 | 0.274413 | 0.273541 | 0.270505 | 0.270448 | 0.261949 | 0.26137  |
| 9.08E-04 | 0.071306 | 0.059625 | 0.128747 | 8.90E-04 | 5.96E-04 | 0.032454 | 0.028191 | 0.239662 | 0.166037 | 0.090072 | 0.012223 | 0.156398 | 0.061896 | 0.484052 |
| 0.106204 | 0.079172 | 0.07291  | 0.150078 | 0.100074 | 0.013943 | 0.253653 | 0.106517 | 0.083522 | 0.060997 | 0.037071 | 0.036643 | 0.095593 | 0.144756 | 0.047909 |
| 0.159504 | 0.044999 | 0.106026 | 0.053483 | 0.424637 | 0.202772 | 0.012656 | 0.150231 | 0.008689 | 0.179817 | 0.018353 | 0.093101 | 0.030396 | 0.161823 | 0.02304  |
| 0.006343 | 0.123864 | 0.030611 | 0.041819 | 5.58E-04 | 0.00686  | 0.16141  | 0.008378 | 0.046254 | 0.046629 | 0.245092 | 0.008309 | 0.043938 | 0.006658 | 0.024874 |
| 0.006215 | 0.058729 | 0.096158 | 0.092736 | 0.001339 | 0.01498  | 0.020328 | 0.026974 | 0.123426 | 0.015502 | 0.08917  | 0.109516 | 0.125108 | 0.030077 | 0.035673 |
| 0.097487 | 0.011564 | 0.073457 | 0.002713 | 0.016824 | 0.112594 | 0.005804 | 0.091887 | 0.00327  | 0.045376 | 0.026608 | 0.138939 | 0.016    | 0.048235 | 0.025191 |
| 0.008001 | 0.04467  | 0.023036 | 0.024433 | 0.002093 | 0.038903 | 0.041199 | 0.021557 | 0.095935 | 0.002784 | 0.008416 | 0.011294 | 0.078727 | 0.006393 | 0.003831 |
| 0.145226 | 0.032722 | 0.059573 | 0.019549 | 0.103067 | 0.132791 | 0.037694 | 0.080567 | 0.009433 | 0.013918 | 0.015324 | 0.087642 | 0.022347 | 0.032567 | 0.009517 |
| 0.005696 | 0.06117  | 0.019773 | 0.055402 | 0.001982 | 0.001061 | 0.002809 | 0.049263 | 0.034952 | 0.060902 | 0.008497 | 0.00942  | 0.009024 | 0.057778 | 0.020498 |
| 0.027233 | 0.008243 | 0.01486  | 0.003937 | 0.002302 | 0.019276 | 0.004771 | 0.015862 | 0.004497 | 0.001675 | 0.001672 | 0.023303 | 0.012516 | 0.025325 | 0.003429 |
| 0.003181 | 0.004295 | 0.004791 | 0.010415 | 0.011194 | 0.010872 | 0.003502 | 0.021526 | 0.006559 | 0.018328 | 0.006436 | 0.002169 | 0.009454 | 0.002908 | 0.008777 |
| 0.003582 | 0.017798 | 0.004326 | 0.007281 | 0.00127  | 0.008315 | 0.004459 | 0.015513 | 0.003071 | 0.004593 | 0.007626 | 0.006271 | 0.006733 | 0.002796 | 0.00257  |
| 0.026795 | 0        | 0.009713 | 0        | 3.31E-04 | 5.48E-04 | 0        | 0.001806 | 0        | 2.60E-05 | 3.90E-05 | 0.068047 | 9.50E-05 | 0.038195 | 0        |
| 0.004053 | 0.019414 | 0.020576 | 0.013678 | 0.001235 | 0.021358 | 0.001681 | 0.011567 | 0.00565  | 0.029165 | 0.077767 | 0.006227 | 0.007097 | 0.005376 | 0.006364 |
| 0.034926 | 0.012003 | 0.015321 | 0.004325 | 0.015556 | 0.001618 | 5.07E-04 | 0.004643 | 0.006304 | 0.00227  | 0.008038 | 0.016057 | 0.002221 | 8.87E-04 | 0.001831 |
| 0.003653 | 0.010081 | 0.00874  | 0.01416  | 6.03E-04 | 0.020067 | 0.010143 | 0.008227 | 0.004845 | 0.030203 | 0.030907 | 0.012024 | 0.009474 | 0.008708 | 0.004667 |
| 0.004371 | 0.013974 | 0.007745 | 0.010236 | 0.001246 | 0.007718 | 0.003071 | 0.010372 | 0.00195  | 0.005696 | 0.01077  | 0.0156   | 0.006136 | 0.005003 | 0.004417 |
| 0.002023 | 0.006824 | 0.010787 | 0.003923 | 0.001887 | 0.005606 | 0.001021 | 0.005638 | 3.64E-04 | 0.007941 | 0.001339 | 0.004095 | 0.004842 | 0.006204 | 0.002202 |
| 0.004541 | 2.99E-04 | 0.003277 | 2.77E-04 | 0.004203 | 0.022697 | 4.24E-04 | 0.01335  | 1.30E-04 | 0.001254 | 9.39E-04 | 0.004281 | 9.77E-04 | 0.001198 | 8.37E-04 |
| 0.002479 | 0.006719 | 0.011344 | 0.005987 | 5.07E-04 | 0.015459 | 0.005239 | 0.007206 | 0.003296 | 0.001488 | 0.013419 | 0.00668  | 0.006152 | 0.008286 | 0.00347  |
| 6.87E-04 | 0.002138 | 5.88E-04 | 0.002875 | 4.61E-04 | 5.05E-04 | 0.016678 | 1.83E-04 | 0.001483 | 0.001195 | 2.13E-04 | 1.22E-04 | 0.003618 | 3.40E-04 | 4.03E-04 |
| 0.001162 | 9.26E-04 | 0.003604 | 0.002402 | 1.14E-04 | 0.00303  | 1.96E-04 | 0.005754 | 0.001087 | 0.001022 | 8.17E-04 | 0.001341 | 0.002235 | 0.001482 | 0.001365 |
| 0        | 0.028155 | 0.013994 | 0.002764 | 0        | 0        | 0.011263 | 0        | 0.002563 | 0        | 0        | 0        | 0.002437 | 3.44E-04 | 0.00258  |
| 0.001791 | 0.001219 | 0.001171 | 0.002687 | 0.004739 | 0.005111 | 0.002579 | 0.010342 | 0.001458 | 0.004434 | 0.001049 | 7.07E-04 | 0.003617 | 0.001532 | 0.001086 |
| 2.29E-04 | 3.92E-04 | 0.002647 | 0.013808 | 2.80E-04 | 6.38E-04 | 0.006113 | 1.90E-04 | 0.003801 | 2.40E-04 | 2.65E-04 | 0.001321 | 0.007357 | 0.031687 | 0.002189 |
| 0        | 0.001289 | 4.80E-04 | 0.004805 | 2.40E-05 | 0        | 8.30E-05 | 0.003327 | 0.007475 | 0.006127 | 5.70E-04 | 3.00E-05 | 0.001328 | 7.99E-04 | 0.005531 |
| 8.80E-05 | 1.12E-04 | 5.06E-04 | 0.005946 | 2.85E-04 | 2.61E-04 | 1.07E-04 | 7.75E-04 | 0.002436 | 8.70E-05 | 2.80E-05 | 9.10E-05 | 0.002823 | 0.004101 | 7.09E-04 |
| 0.002609 | 5.95E-04 | 0.001023 | 3.63E-04 | 0.002183 | 0.01166  | 2.79E-04 | 0.005028 | 1.83E-04 | 9.90E-04 | 1.69E-04 | 9.68E-04 | 0.001424 | 0.002253 | 2.39E-04 |
| 0.001069 | 0.012304 | 0.00354  | 9.68E-04 | 0        | 3.90E-05 | 0.06221  | 2.91E-04 | 9.04E-04 | 1.87E-04 | 0.004489 | 7.30E-05 | 0.016122 | 9.20E-05 | 0.001847 |
| 0.015701 | 0.002205 | 0.005554 | 0.005004 | 0.002901 | 0.009488 | 0.004432 | 0.001191 | 0.002411 | 2.29E-04 | 6.20E-05 | 8.20E-04 | 0.002832 | 0.006314 | 9.29E-04 |
| 1.54E-04 | 7.20E-05 | 1.07E-04 | 0        | 3.65E-04 | 1.88E-04 | 0        | 1.76E-04 | 0        | 4.50E-05 | 7.20E-05 | 2.69E-04 | 0        | 3.25E-04 | 0        |
| 0        | 5.72E-04 | 9.20E-05 | 0.002731 | 0        | 0        | 3.40E-05 | 0.001384 | 0.002474 | 0.002856 | 1.64E-04 | 3.70E-05 | 9.60E-04 | 0        | 0.001936 |
| 8.66E-04 | 0.001915 | 0.001713 | 0.001975 | 2.70E-05 | 3.28E-04 | 2.70E-05 | 0        | 8.40E-05 | 4.04E-04 | 0.008861 | 2.89E-04 | 4.68E-04 | 7.73E-04 | 0.001137 |
| 0.001346 | 2.14E-04 | 1.17E-04 | 0.003257 | 1.55E-04 | 8.79E-04 | 0.001957 | 3.24E-04 | 9.92E-04 | 3.56E-04 | 0        | 0.001048 | 0.004779 | 5.24E-04 | 2.89E-04 |
| 1.49E-04 | 2.44E-04 | 0        | 0.00137  | 0        | 2.69E-04 | 3.80E-05 | 6.20E-05 | 6.56E-04 | 4.00E-05 | 3.88E-04 | 9.20E-05 | 0.001502 | 0.004743 | 3.79E-04 |
| 2.37E-04 | 0.002378 | 4.24E-04 | 0.002732 | 0        | 5.77E-04 | 1.50E-05 | 0        | 0.001448 | 0.001636 | 0.001011 | 7.83E-04 | 0.019694 | 4.79E-04 | 0        |
| 0.001091 | 0.001183 | 0.003803 | 2.55E-04 | 5.75E-04 | 0.001314 | 2.88E-04 | 2.35E-04 | 8.01E-04 | 9.30E-05 | 2.82E-04 | 0.001141 | 2.50E-04 | 5.07E-04 | 8.10E-04 |
| 1.27E-04 | 5.30E-05 | 0        | 0        | 0        | 3.02E-04 | 3.00E-05 | 3.78E-04 | 3.32E-04 | 2.00E-05 | 0        | 2.90E-05 | 0.00113  | 4.81E-04 | 2.50E-05 |
| 0.00471  | 0        | 0.001237 | 0        | 3.10E-05 | 0        | 0        | 1.81E-04 | 0        | 0        | 1.08E-04 | 0.016074 | 4.40E-05 | 0.002569 | 0        |
| 4.30E-05 | 4.07E-04 | 5.86E-04 | 4.90E-04 | 9.72E-04 | 0.001197 | 2.48E-04 | 0.00141  | 6.60E-05 | 0.001058 | 8.80E-05 | 8.20E-05 | 6.26E-04 | 8.20E-05 | 2.18E-04 |
| 0.001158 | 0        | 4.90E-04 | 0        | 0        | 1.01E-04 | 0        | 0        | 0        | 3.00E-05 | 3.50E-05 | 0.008057 | 4.00E-05 | 0.001048 | 0        |
| 3.19E-04 | 2.39E-04 | 2.64E-04 | 1.06E-04 | 8.50E-05 | 0.00093  | 3.00E-05 | 0.001278 | 1.50E-05 | 4.51E-04 | 7.80E-05 | 6.20E-05 | 1.36E-04 | 1.51E-04 | 0        |
| 0.001337 | 0        | 6.70E-04 | 0        | 0        | 4.80E-05 | 0        | 5.40E-05 | 0        | 2.10E-05 | 0        | 0.007357 | 3.70E-05 | 0.001499 | 0        |
| 0        | 0        | 0        | 5.50E-05 | 2.20E-05 | 0        | 6.80E-05 | 1.13E-04 | 0.001404 | 5.30E-05 | 1.00E-04 | 0        | 5.93E-04 | 3.60E-05 | 2.70E-04 |
| 2.26E-04 | 6.81E-04 | 4.13E-04 | 0.001178 | 0        | 3.33E-04 | 1.68E-04 | 2.30E-04 | 2.55E-04 | 5.99E-04 | 0.001117 | 1.79E-04 | 2.92E-04 | 3.86E-04 | 5.31E-04 |
| 5.20E-05 | 0.005639 | 9.80E-05 | 1.26E-04 | 1.12E-04 | 0        | 1.30E-04 | 0        | 7.90E-05 | 0        | 0        | 3.70E-05 | 4.30E-05 | 4.01E-04 | 2.50E-05 |
| 5.10E-05 | 9.02E-04 | 1.10E-04 | 3.37E-04 | 0        | 4.40E-05 | 3.20E-04 | 6.10E-05 | 7.90E-05 | 1.91E-04 | 8.10E-04 | 0        | 3.50E-05 | 1.60E-04 | 2.65E-04 |
| 4.73E-04 | 3.57E-04 | 1.14E-04 | 0        | 8.00E-05 | 9.30E-05 | 3.30E-05 | 0        | 1.14E-04 | 1.74E-04 | 7.60E-05 | 3.87E-04 | 7.93E-04 | 4.22E-04 | 0        |
| 0        | 0        | 1.18E-04 | 4.40E-05 | 0        | 0        | 0        | 0        | 3.10E-05 | 0        | 0        | 2.10E-05 | 0        | 1.69E-04 | 0        |
| 4.30E-05 | 0        | 0        | 0        | 0        | 0        | 0        | 0        | 0        | 0        | 0        | 1.82E-04 | 0        | 3.90E-05 | 0        |
| 0.008379 | 0.010771 | 0.008126 | 0.006016 | 0.001484 | 0.011576 | 0.004418 | 0.005302 | 0.003723 | 0.008448 | 0.008052 | 0.016055 | 0.011109 | 0.019244 | 0.002718 |

|          |          |          |          |          |          |          |          |          |          |          |          |          |          |          |
|----------|----------|----------|----------|----------|----------|----------|----------|----------|----------|----------|----------|----------|----------|----------|
| HC032    | HC081    | HC002    | HC114    | HC142    | HC146    | HC074    | HC035    | HC085    | HC117    | HC075    | HC065    | HC138    | HC019    | HC010    |
| 0.258917 | 0.250023 | 0.249771 | 0.248738 | 0.244464 | 0.243483 | 0.239719 | 0.238996 | 0.225626 | 0.222168 | 0.218653 | 0.215609 | 0.213204 | 0.209415 | 0.204478 |
| 0.153367 | 0.107935 | 0.005497 | 0.093265 | 0.281065 | 0.127106 | 0.149444 | 0.042329 | 0.002901 | 0.028512 | 0.144115 | 0.173801 | 0.06095  | 0.001897 | 0.225927 |
| 0.115294 | 0.209775 | 0.097424 | 0.037154 | 0.102771 | 0.006378 | 0.074626 | 0.082373 | 0.044448 | 0.083421 | 0.126131 | 0.064224 | 0.043198 | 0.017034 | 0.039936 |
| 0.09603  | 0.049429 | 0.301293 | 0.003042 | 0.009412 | 0.010836 | 0.047859 | 0.075202 | 0.284494 | 0.026998 | 0.081906 | 0.099931 | 0.012949 | 0.118495 | 0.058848 |
| 0.006474 | 0.001215 | 0.002714 | 0.081598 | 0.038457 | 0.345786 | 0.212457 | 0.033699 | 0.007959 | 0.030721 | 0.022815 | 0.03155  | 0.267212 | 0.005462 | 0.065657 |
| 0.075112 | 0.009077 | 0.001677 | 0.249687 | 0.058995 | 0.093274 | 0.027208 | 0.080604 | 0.023837 | 0.050656 | 0.048366 | 0.015667 | 0.134214 | 0.070217 | 0.072027 |
| 0.037738 | 0.049668 | 0.048506 | 0.011739 | 0.009117 | 0.026052 | 0.065242 | 0.114877 | 0.078326 | 0.002817 | 0.041678 | 0.087429 | 0.020095 | 0.303771 | 0.056002 |
| 0.035967 | 0.125832 | 0.002139 | 0.027117 | 0.068579 | 0.018208 | 0.006495 | 0.024618 | 0.006038 | 0.288051 | 0.06755  | 0.007923 | 0.019701 | 0.01204  | 0.01784  |
| 0.053774 | 0.028747 | 0.171608 | 0.004322 | 0.012571 | 0.010568 | 0.017544 | 0.088524 | 0.124122 | 0.054079 | 0.076095 | 0.085313 | 0.01422  | 0.082625 | 0.029267 |
| 0.045692 | 0.005963 | 0.002824 | 0.02598  | 0.02488  | 0.00165  | 0.059229 | 0.038567 | 0.052761 | 0.004507 | 0.014402 | 0.044659 | 0.070106 | 0.001829 | 0.032693 |
| 0.00819  | 0.004634 | 0.016192 | 7.12E-04 | 8.68E-04 | 8.19E-04 | 0.006779 | 0.017649 | 0.015785 | 0.001267 | 0.017433 | 0.036715 | 0.004971 | 0.005939 | 0.038317 |
| 0.004816 | 0.009422 | 0.019741 | 0.008624 | 0.009547 | 0.002111 | 0.016074 | 0.011217 | 0.009659 | 0.004931 | 0.00552  | 0.008635 | 0.012787 | 0.001007 | 0.006626 |
| 0.007693 | 0.031615 | 0.00376  | 0.010203 | 0.013884 | 0.011815 | 0.006021 | 0.013452 | 0.015187 | 0.016401 | 0.005919 | 0.004228 | 0.010292 | 0.008391 | 0.017126 |
| 0        | 7.09E-04 | 9.48E-04 | 0        | 0        | 0        | 1.01E-04 | 0        | 0.002365 | 0        | 0.008487 | 0        | 0        | 3.73E-04 | 0        |
| 0.009695 | 0.001931 | 0.004166 | 0.014191 | 0.008336 | 0.022326 | 0.004287 | 0.010676 | 0.013215 | 0.004815 | 0.005034 | 0.0092   | 0.015656 | 0.018162 | 0.013719 |
| 0.007635 | 0.017682 | 0.008774 | 0.003866 | 0.038154 | 0.005582 | 0.003722 | 0.02298  | 0.005372 | 0.015276 | 0.023737 | 0.015571 | 0.013615 | 0.015412 | 0.008711 |
| 0.007983 | 0.002853 | 0.00386  | 0.00513  | 0.003184 | 0.04983  | 0.003776 | 0.01362  | 0.012231 | 0.009009 | 0.008465 | 0.011827 | 0.010492 | 0.050342 | 0.010164 |
| 0.013127 | 0.015152 | 0.002282 | 0.003455 | 0.002895 | 0.001794 | 0.00567  | 0.012872 | 0.018801 | 0.010247 | 0.008596 | 0.003888 | 0.002801 | 0.018053 | 0.018652 |
| 0.00425  | 2.89E-04 | 0.003926 | 0.001184 | 0.001408 | 2.40E-04 | 0.00316  | 0.007914 | 0.010131 | 2.56E-04 | 0.003936 | 0.00204  | 0.007896 | 0.007474 | 0.001203 |
| 0.002154 | 0.005037 | 0.013513 | 4.05E-04 | 8.27E-04 | 1.30E-04 | 0.002565 | 0.011755 | 0.006367 | 6.61E-04 | 0.002299 | 0.006266 | 0.001067 | 0.002737 | 0.001564 |
| 0.009902 | 0.002427 | 0.0041   | 0.001894 | 0.005889 | 0.001344 | 0.004491 | 0.008959 | 0.007122 | 0.013242 | 0.00822  | 0.014731 | 0.004743 | 0.007161 | 0.012603 |
| 8.48E-04 | 0        | 2.91E-04 | 0.083625 | 0.013221 | 0.008536 | 1.76E-04 | 0.001162 | 2.47E-04 | 0.001438 | 0.004269 | 7.58E-04 | 0.005128 | 0.001503 | 1.48E-04 |
| 8.99E-04 | 0.014021 | 7.31E-04 | 0.001269 | 0.004805 | 0.002603 | 0.001503 | 0.004599 | 0.008912 | 0.008491 | 0.001553 | 8.60E-05 | 0.001556 | 2.72E-04 | 0.003096 |
| 0.013114 | 0        | 3.30E-05 | 8.20E-04 | 0        | 0        | 0        | 0.012895 | 0        | 0.004215 | 0        | 0.021679 | 0.004953 | 0        | 0.031138 |
| 0.001364 | 0.006887 | 0.007385 | 0.001404 | 0.002489 | 2.20E-04 | 0.003548 | 0.004589 | 0.004626 | 0.001164 | 0.002296 | 0.003018 | 0.001462 | 3.25E-04 | 0.001864 |
| 0.004486 | 6.30E-04 | 0.00186  | 0.009578 | 0.00237  | 4.10E-05 | 6.17E-04 | 0.001824 | 3.04E-04 | 0.026553 | 0.002826 | 0.00203  | 0.001923 | 9.60E-05 | 3.47E-04 |
| 0.00185  | 0.001303 | 1.26E-04 | 0.001814 | 0.004966 | 1.56E-04 | 0.007604 | 0.00169  | 2.83E-04 | 3.33E-04 | 0.001161 | 0.00266  | 0.002741 | 2.30E-05 | 0.00188  |
| 0.002802 | 0.006276 | 0.001173 | 0        | 2.04E-04 | 0        | 3.40E-05 | 8.20E-05 | 4.50E-05 | 0.016547 | 0.001461 | 3.16E-04 | 0        | 0        | 2.67E-04 |
| 7.68E-04 | 0.00107  | 0.010515 | 3.40E-05 | 1.86E-04 | 3.50E-05 | 0.001639 | 0.003159 | 0.00626  | 6.00E-05 | 0.001915 | 0.005307 | 3.21E-04 | 4.76E-04 | 0.002702 |
| 6.99E-04 | 0        | 1.27E-04 | 0.003682 | 0.003344 | 1.38E-04 | 0.016238 | 0.003469 | 8.27E-04 | 0.003924 | 0.001545 | 1.50E-04 | 0.011992 | 0.014743 | 0.004562 |
| 0.00394  | 0.001877 | 0.004219 | 9.40E-04 | 0.001564 | 0        | 8.41E-04 | 0.004838 | 0.00278  | 0.006786 | 0.013071 | 0.002491 | 9.45E-04 | 2.18E-04 | 0.003185 |
| 0.002018 | 0        | 1.45E-04 | 3.70E-05 | 4.40E-05 | 0        | 1.58E-04 | 5.20E-05 | 2.80E-05 | 0        | 0.013841 | 0.010816 | 0        | 5.83E-04 | 0.003803 |
| 9.34E-04 | 3.44E-04 | 7.20E-05 | 0.001864 | 0.001905 | 8.40E-05 | 0.002383 | 4.40E-04 | 2.00E-05 | 3.30E-05 | 8.43E-04 | 0.001281 | 0.001943 | 0        | 7.71E-04 |
| 2.30E-05 | 0        | 2.41E-04 | 0.002159 | 0.00171  | 4.38E-04 | 5.34E-04 | 0        | 4.73E-04 | 0.002162 | 2.45E-04 | 2.30E-04 | 0.011661 | 2.30E-05 | 4.57E-04 |
| 0.001667 | 0.0106   | 3.59E-04 | 0.002878 | 1.05E-04 | 1.56E-04 | 7.20E-05 | 2.61E-04 | 1.19E-04 | 0.004148 | 3.34E-04 | 1.37E-04 | 3.40E-05 | 0.00283  | 1.04E-04 |
| 9.28E-04 | 6.03E-04 | 9.60E-05 | 0.002045 | 1.08E-04 | 4.32E-04 | 0        | 1.32E-04 | 4.20E-05 | 4.09E-04 | 1.30E-04 | 3.91E-04 | 6.70E-05 | 2.55E-04 | 1.26E-04 |
| 1.06E-04 | 7.50E-05 | 1.61E-04 | 0.01028  | 0.014637 | 1.80E-04 | 2.57E-04 | 0.001099 | 2.30E-05 | 0.025186 | 9.06E-04 | 6.30E-05 | 5.96E-04 | 5.57E-04 | 6.39E-04 |
| 8.44E-04 | 0.00155  | 1.03E-04 | 0.001107 | 0.002321 | 3.45E-04 | 4.02E-04 | 8.23E-04 | 3.30E-04 | 0.002985 | 0.002851 | 2.62E-04 | 0.002045 | 0.001021 | 0.001451 |
| 5.48E-04 | 0.015133 | 1.94E-04 | 5.48E-04 | 6.39E-04 | 1.80E-05 | 3.70E-05 | 0        | 0.001385 | 0.006516 | 0.001194 | 2.40E-05 | 0        | 3.60E-05 | 1.40E-04 |
| 0        | 1.23E-04 | 1.40E-04 | 0        | 4.40E-05 | 1.20E-05 | 3.40E-05 | 0        | 6.70E-05 | 0        | 0.001233 | 0        | 0        | 4.22E-04 | 0        |
| 1.45E-04 | 2.16E-04 | 8.96E-04 | 3.26E-04 | 3.74E-04 | 0        | 5.21E-04 | 9.71E-04 | 0.001935 | 0        | 3.38E-04 | 2.08E-04 | 8.08E-04 | 6.00E-05 | 3.03E-04 |
| 0        | 0        | 1.05E-04 | 0        | 3.60E-05 | 0        | 3.00E-05 | 0        | 1.67E-04 | 0        | 4.49E-04 | 0        | 0        | 0.001198 | 0        |
| 8.50E-05 | 2.13E-04 | 0.001655 | 0        | 0        | 0        | 3.00E-05 | 5.30E-04 | 5.68E-04 | 0        | 3.17E-04 | 4.46E-04 | 3.10E-05 | 8.60E-05 | 2.60E-04 |
| 0        | 5.40E-05 | 9.10E-05 | 0        | 0        | 0        | 0        | 0        | 2.51E-04 | 0        | 5.52E-04 | 0        | 0        | 6.43E-04 | 0        |
| 9.70E-05 | 4.12E-04 | 0        | 0.026412 | 8.46E-04 | 4.70E-05 | 2.37E-04 | 2.20E-05 | 0        | 2.15E-04 | 1.36E-04 | 3.76E-04 | 3.50E-05 | 0        | 1.48E-04 |
| 2.98E-04 | 0        | 2.90E-05 | 0.001379 | 0        | 0.003043 | 3.70E-05 | 5.00E-04 | 2.42E-04 | 3.00E-04 | 3.92E-04 | 2.40E-05 | 3.49E-04 | 8.66E-04 | 2.29E-04 |
| 0.001913 | 0        | 0        | 0        | 2.47E-04 | 0        | 0        | 2.83E-04 | 0        | 2.55E-04 | 5.30E-05 | 0.002172 | 1.61E-04 | 5.00E-05 | 0.00432  |
| 3.66E-04 | 0        | 3.60E-05 | 5.49E-04 | 2.17E-04 | 5.80E-05 | 3.22E-04 | 1.09E-04 | 6.10E-05 | 6.70E-05 | 1.44E-04 | 4.00E-05 | 0.001231 | 0        | 5.77E-04 |
| 4.30E-05 | 1.67E-04 | 7.50E-05 | 7.40E-05 | 6.80E-05 | 0        | 1.81E-04 | 3.40E-05 | 0        | 0.011302 | 4.77E-04 | 2.32E-04 | 4.40E-05 | 3.40E-05 | 1.05E-04 |
| 3.80E-05 | 0        | 0        | 0        | 0        | 0        | 0        | 3.40E-05 | 2.20E-05 | 0        | 2.30E-05 | 1.21E-04 | 0        | 0        | 3.80E-05 |
| 0        | 0        | 0        | 0        | 0        | 0        | 0        | 0        | 0        | 0        | 0        | 0        | 0        | 0        | 1.70E-05 |
| 0.005367 | 0.009031 | 0.004427 | 0.01487  | 0.008247 | 0.004126 | 0.006096 | 0.00552  | 0.003236 | 0.008876 | 0.006088 | 0.005475 | 0.009805 | 0.015844 | 0.005963 |

| HC147    | HC134    | HC145    | HC109    | HC077    | HC007    | HC038    | HC042    | HC093    | HC034    | HC014    | HC060    | HC041    | HC016    | HC096    |
|----------|----------|----------|----------|----------|----------|----------|----------|----------|----------|----------|----------|----------|----------|----------|
| 0.198302 | 0.196506 | 0.190929 | 0.189258 | 0.189036 | 0.186847 | 0.18478  | 0.17813  | 0.17122  | 0.170806 | 0.169059 | 0.16644  | 0.165359 | 0.160803 | 0.154875 |
| 0.0447   | 0.063122 | 0.01874  | 0.590905 | 0.681109 | 0.433802 | 0.120143 | 0.001089 | 0.107621 | 0.010208 | 0.001799 | 0.015163 | 0.067049 | 0.298947 | 0.273914 |
| 0.098737 | 0.061729 | 0.021824 | 0.103059 | 0.021594 | 0.074256 | 0.049418 | 0.024939 | 0.029999 | 0.061033 | 0.174817 | 0.423361 | 0.103194 | 0.057818 | 0.058601 |
| 0.023746 | 0.097169 | 0.147504 | 0.017426 | 0.012366 | 0.011068 | 0.084208 | 0.064472 | 0.106921 | 0.067753 | 0.221871 | 0.048911 | 0.08434  | 0.095714 | 0.034822 |
| 0.320029 | 0.050852 | 0.04013  | 0.021071 | 0.008625 | 0.053337 | 0.013926 | 8.91E-04 | 0.008558 | 0.003978 | 0.002878 | 0.043316 | 0.38443  | 0.131031 | 0.071546 |
| 0.166424 | 0.025365 | 0.022262 | 0.002094 | 0.013773 | 0.047642 | 0.1343   | 0.00458  | 0.169404 | 0.027456 | 0.019447 | 0.040763 | 0.023181 | 0.03296  | 0.065835 |
| 0.014644 | 0.126138 | 0.273494 | 0.005947 | 0.027351 | 0.00467  | 0.009353 | 0.18893  | 0.050481 | 0.08196  | 0.105336 | 0.00272  | 0.049924 | 0.0252   | 0.02505  |
| 0.010157 | 0.010134 | 0.002921 | 0.003126 | 0.002166 | 0.022631 | 0.004272 | 0.030685 | 0.089696 | 9.49E-04 | 0.017827 | 0.024039 | 0.002752 | 0.006197 | 0.010598 |
| 0.012531 | 0.055612 | 0.124663 | 0.011817 | 0.001632 | 0.034451 | 0.078649 | 0.399608 | 0.101267 | 0.108426 | 0.091628 | 0.031897 | 0.01039  | 0.008247 | 0.006692 |
| 0.022653 | 0.105094 | 0.006965 | 0.004263 | 0.005296 | 0.020205 | 0.172775 | 0.001277 | 0.020866 | 0.110619 | 8.36E-04 | 0.020204 | 0.030834 | 0.090263 | 0.177672 |
| 0.003539 | 0.064037 | 0.022711 | 7.96E-04 | 7.93E-04 | 0.004219 | 0.004162 | 0.01054  | 0.004742 | 0.019881 | 0.0202   | 0.011329 | 0.005885 | 0.011927 | 0.004809 |
| 0.012256 | 0.005115 | 0.017709 | 0.01406  | 0.011304 | 0.005562 | 0.026837 | 0.006371 | 0.00306  | 0.002571 | 0.003411 | 0.009259 | 0.01788  | 0.019641 | 0.014554 |
| 0.003356 | 0.002689 | 0.005713 | 0.001683 | 0.002246 | 0.005791 | 0.018978 | 0.011313 | 0.006988 | 0.003849 | 0.005898 | 0.016435 | 0.006447 | 0.008227 | 0.008421 |
| 7.30E-05 | 0        | 2.05E-04 | 6.00E-05 | 0        | 0        | 3.31E-04 | 2.94E-04 | 6.11E-04 | 0        | 0.015784 | 1.59E-04 | 0        | 0        | 8.20E-05 |
| 0.009508 | 0.016116 | 0.007405 | 0.005479 | 0.001542 | 0.006859 | 0.013311 | 4.38E-04 | 0.014425 | 0.009657 | 0.001144 | 0.010192 | 0.014933 | 0.004131 | 0.014925 |
| 0.006193 | 0.007274 | 0.003793 | 0.001278 | 0.001763 | 0.004148 | 0.001557 | 0.001878 | 0.010149 | 0.002369 | 0.015848 | 0.059865 | 6.01E-04 | 0.001652 | 0.001746 |
| 0.010805 | 0.002962 | 0.009566 | 0.005756 | 0.001816 | 0.011355 | 0.016753 | 6.00E-05 | 0.041115 | 0.006291 | 0.005571 | 0.010584 | 0.0017   | 0.001816 | 0.003997 |
| 0.00515  | 0.003104 | 0.002723 | 0.001583 | 7.78E-04 | 0.002324 | 0.009978 | 0.00475  | 0.028935 | 0.01081  | 0.010719 | 0.006535 | 0.005628 | 0.001455 | 0.002345 |
| 0.004453 | 0.008565 | 0.006465 | 1.01E-04 | 4.95E-04 | 0.001186 | 0.010417 | 3.13E-04 | 0.001403 | 0.003589 | 0.00209  | 8.65E-04 | 0.001364 | 0.001379 | 0.00282  |
| 0.001014 | 0.004598 | 0.025982 | 6.25E-04 | 3.26E-04 | 4.10E-04 | 0.002207 | 0.056495 | 0.002163 | 0.004595 | 0.005831 | 4.30E-04 | 0.001679 | 7.16E-04 | 6.42E-04 |
| 0.00307  | 0.003407 | 0.004142 | 0.002963 | 8.59E-04 | 0.006222 | 0.002087 | 5.21E-04 | 0.001466 | 0.004601 | 0.011283 | 0.004006 | 0.002943 | 0.002856 | 0.00352  |
| 3.88E-04 | 0.003123 | 1.58E-04 | 8.40E-05 | 0.001028 | 0.00396  | 4.32E-04 | 6.88E-04 | 0.004307 | 3.25E-04 | 8.35E-04 | 0.002032 | 6.80E-04 | 0.001665 | 0.006187 |
| 0.009151 | 6.08E-04 | 7.55E-04 | 3.88E-04 | 0.001133 | 8.91E-04 | 4.35E-04 | 2.77E-04 | 3.57E-04 | 0.001337 | 0.003508 | 0.003601 | 5.69E-04 | 2.39E-04 | 8.31E-04 |
| 0        | 0.039555 | 0        | 0        | 0        | 0.00265  | 0        | 0        | 0        | 0.140978 | 0.040974 | 0        | 0        | 0.003971 | 0        |
| 0.001696 | 0.001696 | 0.005013 | 0.00215  | 0.001202 | 0.001241 | 0.006189 | 0.00202  | 3.39E-04 | 5.64E-04 | 0.002202 | 0.012576 | 0.004346 | 0.002635 | 0.002083 |
| 5.89E-04 | 0.006199 | 3.84E-04 | 6.37E-04 | 7.20E-05 | 0.020767 | 7.36E-04 | 0.002204 | 1.54E-04 | 0.042863 | 4.10E-05 | 0.004854 | 5.43E-04 | 0.004076 | 0.002013 |
| 0.00207  | 0.001578 | 5.08E-04 | 0.002504 | 0.004439 | 0.003482 | 0.012927 | 2.60E-05 | 5.27E-04 | 1.15E-04 | 4.10E-05 | 0.001429 | 0.002682 | 0.010475 | 0.019391 |
| 1.70E-05 | 6.15E-04 | 0        | 0.002137 | 0        | 0.003087 | 0        | 3.40E-05 | 0        | 9.21E-04 | 0.009438 | 1.27E-04 | 0        | 1.20E-04 | 0        |
| 4.92E-04 | 0.004069 | 0.007808 | 1.43E-04 | 3.10E-05 | 2.58E-04 | 0.001953 | 0.002362 | 4.11E-04 | 9.07E-04 | 0.003084 | 0.001897 | 0.002295 | 0.002714 | 5.00E-04 |
| 0.001405 | 0.002072 | 5.28E-04 | 1.32E-04 | 3.13E-04 | 0.008913 | 2.30E-05 | 3.50E-05 | 2.57E-04 | 5.83E-04 | 2.40E-04 | 1.90E-04 | 0        | 2.34E-04 | 0.004337 |
| 1.59E-04 | 0.002346 | 8.02E-04 | 1.89E-04 | 3.60E-05 | 0.003112 | 8.96E-04 | 0.001125 | 1.26E-04 | 0.005484 | 0.013895 | 0.003848 | 5.60E-05 | 2.46E-04 | 2.39E-04 |
| 0        | 1.93E-04 | 0.013208 | 0.003693 | 6.70E-05 | 0        | 1.40E-05 | 1.07E-04 | 0.001311 | 0.071296 | 4.24E-04 | 2.70E-05 | 0        | 0        | 2.80E-05 |
| 6.52E-04 | 5.71E-04 | 1.17E-04 | 6.84E-04 | 0.002878 | 0.002893 | 0.007617 | 0        | 3.57E-04 | 1.26E-04 | 0        | 3.93E-04 | 7.08E-04 | 0.004798 | 0.011775 |
| 0.002902 | 6.10E-04 | 7.93E-04 | 2.41E-04 | 7.70E-05 | 0.001664 | 1.30E-05 | 0        | 3.07E-04 | 9.50E-04 | 2.01E-04 | 3.96E-04 | 0        | 0.001129 | 0.003632 |
| 1.38E-04 | 3.48E-04 | 4.20E-05 | 9.80E-05 | 7.60E-05 | 9.71E-04 | 2.60E-05 | 5.89E-04 | 0.001788 | 1.50E-04 | 0.002189 | 0.001498 | 6.80E-05 | 7.50E-05 | 4.20E-05 |
| 6.20E-05 | 2.04E-04 | 0        | 8.40E-05 | 3.90E-05 | 0.001123 | 2.20E-05 | 3.62E-04 | 6.00E-04 | 0.001839 | 1.32E-04 | 6.20E-05 | 1.80E-04 | 0        | 2.50E-05 |
| 2.99E-04 | 4.53E-04 | 4.02E-04 | 4.18E-04 | 7.20E-05 | 8.17E-04 | 1.10E-04 | 2.25E-04 | 3.94E-04 | 0        | 2.98E-04 | 0.001254 | 6.40E-05 | 4.32E-04 | 2.81E-04 |
| 0.001083 | 1.82E-04 | 2.12E-04 | 3.47E-04 | 0        | 0.001976 | 2.70E-05 | 1.80E-04 | 2.91E-04 | 1.09E-04 | 2.50E-04 | 0.003734 | 1.74E-04 | 2.00E-04 | 1.41E-04 |
| 2.00E-05 | 2.11E-04 | 9.20E-05 | 2.21E-04 | 2.90E-05 | 2.98E-04 | 0        | 0        | 6.23E-04 | 3.40E-05 | 0        | 0.002738 | 0        | 4.50E-05 | 0        |
| 5.30E-05 | 0        | 4.90E-05 | 0        | 0        | 0        | 3.40E-05 | 1.19E-04 | 0.00178  | 0        | 0.001182 | 2.30E-05 | 0        | 0        | 0        |
| 0.001103 | 3.06E-04 | 0.001082 | 4.00E-05 | 2.54E-04 | 2.24E-04 | 0.001817 | 2.35E-04 | 0        | 1.25E-04 | 1.50E-04 | 0.001165 | 7.08E-04 | 1.54E-04 | 3.85E-04 |
| 0        | 0        | 1.62E-04 | 0        | 0        | 0        | 0        | 1.30E-05 | 9.24E-04 | 0        | 4.28E-04 | 0        | 0        | 0        | 0        |
| 1.60E-04 | 9.07E-04 | 0.001792 | 4.40E-05 | 4.60E-05 | 0        | 6.54E-04 | 3.80E-04 | 4.50E-05 | 1.39E-04 | 2.47E-04 | 4.69E-04 | 5.32E-04 | 0.001016 | 1.82E-04 |
| 0        | 0        | 1.16E-04 | 0        | 0        | 0        | 2.80E-05 | 3.80E-05 | 0.00103  | 0        | 6.36E-04 | 0        | 0        | 0        | 0        |
| 4.70E-05 | 8.03E-04 | 5.30E-05 | 9.70E-05 | 0.001024 | 3.01E-04 | 1.09E-04 | 0        | 1.27E-04 | 0        | 0        | 0        | 9.90E-05 | 1.59E-04 | 0.004151 |
| 1.73E-04 | 1.26E-04 | 3.89E-04 | 8.80E-05 | 8.50E-05 | 4.82E-04 | 8.50E-05 | 2.20E-05 | 0.00182  | 3.17E-04 | 3.40E-05 | 1.08E-04 | 3.20E-05 | 7.40E-05 | 1.46E-04 |
| 0        | 0.010171 | 0        | 0        | 0        | 9.10E-05 | 3.50E-05 | 1.90E-05 | 1.57E-04 | 0.012537 | 3.80E-05 | 0        | 0        | 6.90E-05 | 0        |
| 4.40E-05 | 3.31E-04 | 1.02E-04 | 0        | 7.20E-05 | 4.30E-05 | 2.50E-05 | 0        | 6.80E-04 | 2.34E-04 | 0        | 2.28E-04 | 0        | 2.64E-04 | 2.63E-04 |
| 0        | 4.57E-04 | 0        | 5.10E-05 | 0        | 9.60E-05 | 1.80E-05 | 4.70E-05 | 1.04E-04 | 1.44E-04 | 0.0061   | 2.50E-04 | 0        | 6.90E-05 | 4.00E-05 |
| 0        | 5.10E-05 | 0        | 0        | 0        | 0        | 6.40E-05 | 0        | 5.50E-05 | 0        | 0        | 3.20E-05 | 0        | 0        | 0        |
| 0        | 5.00E-05 | 0        | 0        | 0        | 0        | 0        | 0        | 3.00E-05 | 0        | 0        | 0        | 0        | 0        | 0        |
| 0.005957 | 0.012577 | 0.009587 | 0.00218  | 0.002157 | 0.003675 | 0.007269 | 0.001319 | 0.010009 | 0.006522 | 0.010156 | 0.010596 | 0.005751 | 0.004161 | 0.005862 |

|          |          |          |          |          |          |          |          |          |          |          |          |          |          |          |
|----------|----------|----------|----------|----------|----------|----------|----------|----------|----------|----------|----------|----------|----------|----------|
| HC040    | HC133    | HC120    | HC023    | HC140    | HC059    | HC129    | HC029    | HC149    | HC076    | HC022    | HC131    | HC079    | HC012    | HC086    |
| 0.147075 | 0.145913 | 0.144482 | 0.143703 | 0.141138 | 0.140437 | 0.13749  | 0.130264 | 0.123414 | 0.122978 | 0.122265 | 0.114286 | 0.113771 | 0.110217 | 0.109469 |
| 0.086594 | 0.285133 | 0.109144 | 0.284465 | 0.023416 | 0.007174 | 0.327325 | 0.07455  | 0.673674 | 0.69406  | 0.337412 | 0.02925  | 0.099571 | 0.262731 | 0.059481 |
| 0.005801 | 0.053763 | 0.037195 | 0.116886 | 0.070411 | 0.030856 | 0.074438 | 0.166025 | 0.021613 | 0.016259 | 0.079698 | 0.142507 | 0.075679 | 0.051642 | 0.058122 |
| 0.041575 | 0.012032 | 0.030848 | 0.054715 | 0.024563 | 0.053523 | 0.137402 | 0.097471 | 0.028159 | 0.010412 | 0.060197 | 0.131667 | 0.131207 | 0.032825 | 0.081839 |
| 0.346135 | 0.009941 | 0.280164 | 0.157564 | 0.234417 | 0.006939 | 0.019715 | 0.055725 | 0.040546 | 0.02999  | 0.037453 | 0.030189 | 0.081863 | 0.18539  | 0.383334 |
| 0.242194 | 0.056875 | 0.132205 | 0.039739 | 0.188957 | 0.040022 | 0.01128  | 0.21833  | 0.018994 | 0.056403 | 0.028118 | 0.0265   | 0.108774 | 0.092517 | 0.035403 |
| 0.018042 | 0.017678 | 0.032068 | 0.013764 | 0.084368 | 0.052947 | 0.106012 | 0.027492 | 0.010309 | 0.003373 | 0.12001  | 0.248286 | 0.006615 | 0.062637 | 0.043083 |
| 0.005514 | 0.06666  | 0.009171 | 0.007022 | 0.022691 | 0.024785 | 0.023196 | 0.013555 | 0.003119 | 0.006543 | 0.002679 | 0.006626 | 0.003244 | 0.010754 | 0.002442 |
| 0.002744 | 0.038242 | 0.009807 | 0.018854 | 0.054344 | 0.059174 | 0.025736 | 0.033249 | 0.005576 | 0.003488 | 0.055077 | 0.055146 | 0.012169 | 0.031418 | 0.033117 |
| 0.004612 | 0.160029 | 0.078078 | 0.037803 | 0.032789 | 0.024957 | 0.009842 | 0.037043 | 0.007493 | 0.009586 | 0.029019 | 0.001737 | 0.214631 | 0.042325 | 0.068934 |
| 0.000649 | 0.004527 | 0.010913 | 0.003954 | 0.018229 | 0.032449 | 0.005106 | 0.003724 | 0.002061 | 9.07E-04 | 0.032241 | 0.041315 | 0.003153 | 0.015149 | 0.016029 |
| 0.005392 | 0.005094 | 0.018881 | 0.016508 | 0.012816 | 0.001421 | 0.051805 | 0.013858 | 0.019419 | 0.008277 | 0.02366  | 0.017231 | 0.026951 | 0.008869 | 0.02383  |
| 0.007304 | 0.026852 | 0.010818 | 0.008207 | 0.001747 | 0.007395 | 0.00362  | 0.013012 | 0.001562 | 0.004473 | 0.004602 | 0.012899 | 0.007388 | 0.007055 | 0.006859 |
| 0        | 0        | 3.70E-05 | 3.06E-04 | 0        | 0.394659 | 3.20E-05 | 3.82E-04 | 0        | 0        | 2.18E-04 | 0.001441 | 6.20E-05 | 0        | 2.53E-04 |
| 0.014116 | 0.014657 | 0.017048 | 0.007055 | 0.006296 | 0.005699 | 0.007935 | 0.029234 | 0.001391 | 0.002697 | 0.002714 | 0.013603 | 0.008996 | 0.006197 | 0.020556 |
| 0.008414 | 7.67E-04 | 6.00E-04 | 7.01E-04 | 0.006978 | 0.002918 | 0.012484 | 0.005837 | 3.91E-04 | 0.002316 | 3.67E-04 | 0.001653 | 0.001341 | 0.006705 | 0.005455 |
| 0.018021 | 0.003959 | 0.017435 | 0.006172 | 0.002543 | 0.004832 | 0.004456 | 0.004997 | 0.002475 | 0.004377 | 0.003334 | 0.00884  | 0.004089 | 0.008174 | 0.003293 |
| 0.002811 | 0.008485 | 0.001489 | 0.018579 | 0.003645 | 0.006596 | 0.002274 | 0.018055 | 5.89E-04 | 0.001703 | 0.004625 | 0.012106 | 0.004462 | 0.006909 | 0.006443 |
| 0.001486 | 0.001303 | 0.010225 | 0.007694 | 0.014082 | 0.003636 | 0.00189  | 0.0087   | 7.21E-04 | 1.37E-04 | 0.002442 | 0.00754  | 0.008768 | 0.00943  | 0.002737 |
| 8.80E-05 | 0.001292 | 0.001336 | 0.001256 | 0.006661 | 5.71E-04 | 0.009993 | 0.001704 | 9.97E-04 | 9.40E-05 | 0.013161 | 0.017711 | 1.26E-04 | 0.002672 | 0.003888 |
| 0.003498 | 0.003576 | 0.006623 | 0.011016 | 0.005102 | 0.005705 | 0.003953 | 0.005472 | 0.003387 | 0.00156  | 0.011595 | 0.011746 | 0.003372 | 0.00478  | 0.007353 |
| 8.41E-04 | 0.003194 | 0.002694 | 0.001729 | 0.003046 | 2.46E-04 | 1.81E-04 | 0.001862 | 3.20E-04 | 0.001227 | 6.80E-05 | 0.008139 | 0.007065 | 0.001164 | 5.49E-04 |
| 0.00163  | 7.19E-04 | 0.002232 | 0.005796 | 0.003977 | 0.002485 | 6.65E-04 | 0.003689 | 0.001251 | 8.23E-04 | 0.001713 | 0.024545 | 0.001656 | 0.003562 | 9.56E-04 |
| 0        | 0.033821 | 0        | 0        | 0.012793 | 9.10E-05 | 0        | 0        | 0        | 0        | 0        | 0        | 0        | 0.008392 | 0        |
| 5.73E-04 | 8.09E-04 | 0.002441 | 0.003557 | 0.001666 | 3.16E-04 | 0.006559 | 0.006187 | 0.001617 | 5.57E-04 | 0.007743 | 0.008431 | 0.004329 | 0.001488 | 0.003555 |
| 5.79E-04 | 3.61E-04 | 0.001037 | 9.17E-04 | 2.05E-04 | 5.60E-04 | 0.001042 | 4.84E-04 | 4.53E-04 | 4.76E-04 | 3.61E-04 | 1.98E-04 | 0.016061 | 8.56E-04 | 4.35E-04 |
| 7.77E-04 | 0.010617 | 0.008605 | 0.007956 | 9.95E-04 | 4.30E-05 | 0.002344 | 0.004106 | 0.00648  | 0.005981 | 0.005731 | 1.09E-04 | 0.018005 | 0.003914 | 0.0052   |
| 0        | 0        | 0        | 0.001685 | 5.10E-05 | 4.90E-05 | 3.60E-05 | 9.69E-04 | 1.64E-04 | 0        | 2.80E-05 | 0        | 4.50E-05 | 0        | 0        |
| 1.76E-04 | 1.08E-04 | 0.001548 | 6.82E-04 | 0.001276 | 7.95E-04 | 0.002994 | 8.97E-04 | 6.94E-04 | 1.79E-04 | 0.007247 | 0.005695 | 0.001562 | 9.75E-04 | 0.003804 |
| 0.023687 | 0.001472 | 0.001852 | 0.001767 | 0.001028 | 9.90E-05 | 2.49E-04 | 0.003321 | 0.001182 | 0.001189 | 0        | 8.10E-05 | 0.00572  | 0.007963 | 0.001868 |
| 0        | 0.001034 | 1.79E-04 | 0.001442 | 0.001784 | 0.001759 | 0.002141 | 0.00217  | 2.14E-04 | 4.50E-05 | 6.70E-04 | 0.00105  | 4.42E-04 | 0.001567 | 5.20E-04 |
| 1.00E-04 | 2.50E-05 | 5.20E-05 | 0        | 1.44E-04 | 6.30E-05 | 3.20E-05 | 4.50E-05 | 3.10E-05 | 0        | 0        | 5.50E-05 | 0        | 3.10E-05 | 9.40E-05 |
| 3.48E-04 | 0.004713 | 0.00404  | 0.003738 | 2.44E-04 | 3.40E-04 | 0.001292 | 9.83E-04 | 0.012449 | 0.003182 | 5.39E-04 | 1.17E-04 | 0.005113 | 0.002154 | 0.001707 |
| 0.001498 | 0.002617 | 0.0043   | 0.00388  | 0.004833 | 5.40E-05 | 2.90E-05 | 4.16E-04 | 5.10E-04 | 4.67E-04 | 2.95E-04 | 0        | 0.011866 | 8.65E-04 | 9.80E-05 |
| 3.60E-05 | 2.60E-05 | 0        | 1.30E-04 | 6.00E-05 | 2.22E-04 | 3.57E-04 | 0.001919 | 0        | 4.06E-04 | 4.40E-05 | 3.80E-05 | 3.67E-04 | 4.28E-04 | 4.70E-05 |
| 6.20E-05 | 0        | 4.40E-05 | 3.90E-05 | 6.30E-05 | 6.50E-05 | 0        | 3.13E-04 | 3.90E-05 | 4.63E-04 | 2.39E-04 | 0        | 3.63E-04 | 1.32E-04 | 3.50E-05 |
| 0.001002 | 0.007298 | 7.55E-04 | 0.001565 | 8.45E-04 | 2.30E-04 | 9.80E-05 | 0.001807 | 7.34E-04 | 0.003479 | 0        | 2.99E-04 | 0.001068 | 6.47E-04 | 1.86E-04 |
| 4.56E-04 | 3.77E-04 | 2.16E-04 | 5.33E-04 | 8.00E-04 | 4.38E-04 | 1.55E-04 | 4.20E-04 | 9.50E-05 | 1.88E-04 | 1.75E-04 | 8.40E-05 | 5.85E-04 | 4.95E-04 | 3.57E-04 |
| 2.40E-05 | 0        | 0        | 0        | 0        | 0.001156 | 8.15E-04 | 8.00E-05 | 3.70E-05 | 8.60E-05 | 3.10E-05 | 0        | 5.10E-05 | 2.60E-05 | 0        |
| 0        | 0        | 4.00E-05 | 1.03E-04 | 0        | 0.025801 | 0        | 1.09E-04 | 4.30E-05 | 0        | 2.80E-05 | 1.87E-04 | 0        | 0        | 3.50E-05 |
| 8.90E-05 | 5.60E-05 | 0.001376 | 0.001596 | 0.0013   | 9.00E-05 | 8.09E-04 | 0.002026 | 2.25E-04 | 0        | 8.34E-04 | 0.00232  | 0.002415 | 8.21E-04 | 8.74E-04 |
| 0        | 0        | 0        | 0        | 0        | 0.024241 | 0        | 1.09E-04 | 0        | 0        | 0        | 1.05E-04 | 0        | 0        | 3.20E-05 |
| 5.70E-05 | 0        | 5.61E-04 | 2.34E-04 | 3.43E-04 | 7.00E-05 | 3.53E-04 | 1.69E-04 | 4.60E-04 | 4.30E-05 | 6.57E-04 | 0.003664 | 7.42E-04 | 1.71E-04 | 9.31E-04 |
| 0        | 0        | 0        | 2.50E-05 | 0        | 0.016373 | 0        | 3.10E-05 | 0        | 0        | 0        | 1.33E-04 | 0        | 0        | 3.00E-05 |
| 1.50E-05 | 4.33E-04 | 9.30E-05 | 1.06E-04 | 2.11E-04 | 0        | 2.95E-04 | 2.73E-04 | 7.25E-04 | 1.32E-04 | 3.20E-05 | 3.10E-05 | 1.19E-04 | 2.40E-04 | 1.66E-04 |
| 3.95E-04 | 0.001636 | 4.47E-04 | 9.80E-05 | 9.90E-05 | 1.84E-04 | 3.60E-05 | 2.75E-04 | 0        | 2.60E-05 | 4.20E-05 | 5.95E-04 | 2.44E-04 | 2.20E-04 | 3.90E-05 |
| 0        | 0.002179 | 0        | 0        | 4.62E-04 | 7.90E-05 | 0        | 0        | 0        | 0        | 0        | 0        | 0        | 4.67E-04 | 0        |
| 3.35E-04 | 0.001451 | 9.30E-05 | 2.12E-04 | 1.12E-04 | 1.76E-04 | 3.10E-05 | 5.40E-05 | 0        | 3.80E-05 | 0        | 2.25E-04 | 5.80E-05 | 8.50E-05 | 3.60E-05 |
| 0        | 0        | 0        | 0        | 2.44E-04 | 2.90E-05 | 0        | 9.50E-05 | 6.10E-05 | 0        | 0        | 0        | 1.36E-04 | 2.00E-05 | 0        |
| 0        | 0        | 4.50E-05 | 0        | 0        | 0        | 0        | 0        | 0        | 0        | 0        | 0        | 0        | 0        | 0        |
| 0        | 0        | 0        | 0        | 0        | 0        | 0        | 0        | 0        | 0        | 0        | 0        | 0        | 0        | 0        |
| 0.005255 | 0.010276 | 0.008783 | 0.006247 | 0.008226 | 0.017251 | 0.003503 | 0.008512 | 0.006326 | 0.00138  | 0.002636 | 0.01162  | 0.005756 | 0.004921 | 0.006526 |

| HC098    | HC070    | HC106    | HC113    | HC021    | HC049    | HC072    | HC004    | HC102    | HC125    | HC068    | HC143    | HC057    | HC071    | HC018    |
|----------|----------|----------|----------|----------|----------|----------|----------|----------|----------|----------|----------|----------|----------|----------|
| 0.107799 | 0.107394 | 0.096835 | 0.093422 | 0.092625 | 0.084656 | 0.080356 | 0.080205 | 0.080134 | 0.079    | 0.078866 | 0.076858 | 0.07679  | 0.076498 | 0.075548 |
| 0.004773 | 0.168955 | 0.046598 | 0.044376 | 0.019611 | 0.289058 | 0.111679 | 0.026691 | 0.140208 | 0.650344 | 0.406874 | 0.128556 | 0.140546 | 0.373088 | 0.186669 |
| 0.052719 | 0.047932 | 0.13494  | 0.051074 | 0.271959 | 0.035387 | 0.090966 | 0.147202 | 0.083564 | 0.134316 | 0.054258 | 0.087072 | 0.013785 | 0.039578 | 0.052301 |
| 0.037131 | 0.066524 | 0.100282 | 0.154667 | 0.250467 | 0.053709 | 0.044603 | 0.17273  | 0.158122 | 0.006186 | 0.00751  | 0.157076 | 0.006025 | 0.042437 | 0.051794 |
| 0.254665 | 0.113475 | 0.256311 | 0.02859  | 0.017961 | 0.164291 | 0.299    | 0.20846  | 0.189191 | 0.008206 | 0.033439 | 0.036908 | 0.389021 | 0.202773 | 0.119919 |
| 0.376815 | 0.059479 | 0.030045 | 0.097821 | 0.049293 | 0.102202 | 0.025354 | 0.046235 | 0.012867 | 0.061853 | 0.172575 | 0.028892 | 0.261039 | 0.052594 | 0.116564 |
| 0.003016 | 0.049932 | 0.083516 | 0.053703 | 0.068648 | 0.020052 | 0.026552 | 0.113319 | 0.048548 | 0.003905 | 0.003785 | 0.063879 | 0.005454 | 0.056444 | 0.057507 |
| 0.011715 | 0.012412 | 0.00197  | 0.090816 | 0.005959 | 0.003436 | 0.018183 | 0.005795 | 0.007511 | 0.003041 | 0.057552 | 0.020668 | 0.001836 | 0.003258 | 0.04558  |
| 0.006428 | 0.056071 | 0.018303 | 0.058533 | 0.026563 | 0.021822 | 0.02834  | 0.050463 | 0.039349 | 0.007802 | 0.011285 | 0.062218 | 0.003234 | 0.012116 | 0.051736 |
| 0.043491 | 0.187162 | 0.089626 | 0.162443 | 0.042056 | 0.052565 | 0.031722 | 0.024289 | 0.090484 | 0.002318 | 0.046313 | 0.162478 | 0.01481  | 0.020916 | 0.104356 |
| 0.002232 | 0.018281 | 0.020655 | 0.019512 | 0.013563 | 0.023022 | 0.008245 | 0.019962 | 0.020555 | 7.75E-04 | 0.003869 | 0.027298 | 6.53E-04 | 0.005821 | 0.018073 |
| 0.016847 | 0.004521 | 0.027733 | 0.005247 | 0.014709 | 0.028259 | 0.005774 | 0.022054 | 0.033304 | 0.0065   | 0.005882 | 0.002822 | 0.010156 | 0.014196 | 0.005472 |
| 0.008378 | 0.014278 | 0.005359 | 0.007502 | 0.003915 | 0.00934  | 0.021876 | 0.009013 | 0.004947 | 0.005063 | 0.012457 | 0.007968 | 0.012258 | 0.004824 | 0.010132 |
| 0        | 0        | 6.40E-05 | 0        | 2.53E-04 | 1.33E-04 | 0.002359 | 1.53E-04 | 2.19E-04 | 0        | 0        | 0.023327 | 0        | 0        | 9.98E-04 |
| 0.007665 | 0.007748 | 0.005526 | 0.015958 | 0.015068 | 0.022883 | 0.023323 | 0.008284 | 0.006827 | 0.001657 | 0.006699 | 0.009113 | 0.01799  | 0.021009 | 0.008258 |
| 0.004771 | 0.001218 | 0.002557 | 0.002575 | 0.017598 | 0.006552 | 0.006831 | 0.002139 | 0.00658  | 0.003422 | 0.008536 | 0.011835 | 0.002796 | 0.003833 | 0.004248 |
| 4.05E-04 | 0.004416 | 0.002725 | 0.004334 | 0.012596 | 0.004773 | 0.022369 | 0.006465 | 0.007434 | 0.00309  | 0.003627 | 0.004668 | 0.006441 | 0.007124 | 0.010116 |
| 0.008485 | 0.006736 | 0.010595 | 0.015922 | 0.004307 | 0.002422 | 0.024006 | 0.002623 | 0.007167 | 0.001722 | 0.003175 | 0.008374 | 0.004163 | 0.002031 | 0.007189 |
| 0.005589 | 0.010513 | 0.00515  | 0.009846 | 0.014931 | 0.00674  | 0.016369 | 0.007951 | 0.002619 | 1.11E-04 | 0.001034 | 0.006726 | 0.001674 | 0.008896 | 0.017052 |
| 0        | 0.001745 | 0.003317 | 0.002031 | 0.004029 | 0.0021   | 5.83E-04 | 0.007916 | 0.004545 | 3.73E-04 | 7.80E-05 | 7.35E-04 | 8.90E-05 | 0.002005 | 0.002165 |
| 0.002201 | 0.008302 | 0.001452 | 0.002793 | 0.007884 | 0.005114 | 0.007412 | 0.00336  | 0.003882 | 0.00307  | 0.011975 | 0.006078 | 0.001146 | 0.010051 | 0.012483 |
| 0.007182 | 0.00322  | 3.98E-04 | 9.70E-04 | 7.88E-04 | 0.004577 | 0.007937 | 4.01E-04 | 1.85E-04 | 4.31E-04 | 0.03173  | 0.006596 | 0.001702 | 0.001283 | 0.008071 |
| 0.013818 | 0.001659 | 0.008636 | 0.009883 | 0.001444 | 7.49E-04 | 0.001391 | 1.96E-04 | 9.25E-04 | 0.002089 | 0.002722 | 7.43E-04 | 6.25E-04 | 0.001272 | 0.003103 |
| 0        | 0.018595 | 0        | 0.039916 | 0        | 0        | 0.014585 | 0        | 0        | 0        | 0.004494 | 8.70E-05 | 0        | 0.001605 | 0        |
| 0.002656 | 4.99E-04 | 0.010034 | 5.76E-04 | 0.010151 | 0.004875 | 0.001927 | 0.007571 | 0.007188 | 0.002563 | 7.41E-04 | 5.91E-04 | 6.42E-04 | 0.001814 | 0.001075 |
| 1.52E-04 | 0.00161  | 3.00E-05 | 6.67E-04 | 7.67E-04 | 7.53E-04 | 0.002201 | 4.71E-04 | 4.47E-04 | 6.35E-04 | 0.001841 | 3.25E-04 | 1.90E-04 | 0.003183 | 0.001409 |
| 7.44E-04 | 0.0033   | 0.00472  | 0.001774 | 0.001309 | 0.008731 | 0.001222 | 0.001758 | 0.011341 | 0.002297 | 0.006732 | 0.002817 | 0.002542 | 0.002834 | 0.005632 |
| 0        | 0        | 5.90E-05 | 5.50E-05 | 8.13E-04 | 0        | 0        | 0        | 6.30E-05 | 0.002108 | 0        | 0        | 0        | 4.80E-05 | 3.91E-04 |
| 5.46E-04 | 7.52E-04 | 0.005898 | 0.001903 | 0.004453 | 0.004246 | 2.84E-04 | 0.007321 | 0.010204 | 2.80E-05 | 1.97E-04 | 0.001352 | 7.50E-05 | 8.00E-04 | 0.00131  |
| 0.003287 | 3.04E-04 | 0.004305 | 0.001241 | 0.005785 | 0.008629 | 0.011504 | 0.002862 | 0.001469 | 2.28E-04 | 9.13E-04 | 0.00262  | 0.010565 | 0.00198  | 4.47E-04 |
| 8.50E-05 | 0.001013 | 9.11E-04 | 0.002143 | 0.004484 | 3.90E-04 | 0.003143 | 0        | 0.001075 | 0.001038 | 9.68E-04 | 0.001858 | 0        | 9.06E-04 | 0.001713 |
| 0        | 0        | 3.68E-04 | 0        | 1.02E-04 | 6.90E-05 | 1.05E-04 | 1.48E-04 | 0        | 0        | 4.10E-05 | 0.005792 | 2.30E-05 | 6.10E-05 | 1.89E-04 |
| 2.21E-04 | 0.001907 | 0.001948 | 9.07E-04 | 2.80E-04 | 0.008008 | 8.94E-04 | 7.45E-04 | 0.005569 | 0.001177 | 0.002931 | 7.52E-04 | 9.55E-04 | 0.002178 | 0.00102  |
| 0.005436 | 0.00773  | 0.00517  | 3.86E-04 | 0.003058 | 0.003866 | 0.007084 | 0.001758 | 7.73E-04 | 4.97E-04 | 0.001217 | 0.001287 | 0.005144 | 0.00951  | 4.22E-04 |
| 1.78E-04 | 8.90E-05 | 8.60E-05 | 4.70E-05 | 0        | 5.30E-05 | 0.002143 | 0        | 2.16E-04 | 9.60E-05 | 5.91E-04 | 3.30E-05 | 0        | 1.40E-04 | 6.11E-04 |
| 3.30E-05 | 1.20E-04 | 6.70E-05 | 7.80E-05 | 6.80E-05 | 0        | 8.30E-04 | 2.70E-05 | 0        | 3.30E-05 | 4.67E-04 | 7.00E-05 | 2.40E-05 | 3.58E-04 | 4.63E-04 |
| 0.001468 | 2.41E-04 | 5.10E-05 | 1.69E-04 | 1.03E-04 | 5.90E-05 | 0.001468 | 1.49E-04 | 6.40E-05 | 8.16E-04 | 0.001481 | 4.17E-04 | 1.02E-04 | 3.20E-04 | 0.002953 |
| 3.07E-04 | 2.62E-04 | 4.10E-04 | 8.64E-04 | 3.59E-04 | 1.28E-04 | 0.005424 | 1.22E-04 | 0        | 2.27E-04 | 0.002387 | 4.93E-04 | 2.36E-04 | 6.86E-04 | 0.001086 |
| 0        | 0        | 6.00E-05 | 1.08E-04 | 3.50E-05 | 0        | 8.54E-04 | 0        | 2.34E-04 | 2.60E-05 | 0        | 0        | 0        | 8.20E-05 | 2.79E-04 |
| 0        | 0        | 0        | 0        | 3.30E-05 | 0        | 2.04E-04 | 0        | 1.08E-04 | 0        | 0        | 0.003745 | 0        | 0        | 2.63E-04 |
| 8.97E-04 | 3.39E-04 | 0.00174  | 4.22E-04 | 0.002698 | 0.002625 | 8.15E-04 | 0.002616 | 0.001138 | 1.41E-04 | 2.21E-04 | 2.57E-04 | 2.50E-04 | 5.54E-04 | 5.18E-04 |
| 0        | 0        | 0        | 0        | 3.60E-05 | 0        | 2.32E-04 | 2.90E-05 | 0        | 0        | 0        | 0.001873 | 0        | 0        | 4.90E-05 |
| 2.07E-04 | 2.18E-04 | 8.87E-04 | 4.49E-04 | 0.00105  | 0.003392 | 2.05E-04 | 0.002892 | 0.002262 | 0        | 0        | 2.46E-04 | 6.90E-05 | 4.45E-04 | 3.21E-04 |
| 0        | 0        | 2.50E-05 | 0        | 3.70E-05 | 0        | 7.70E-05 | 2.70E-05 | 0        | 0        | 0        | 0.001685 | 2.50E-05 | 0        | 1.40E-04 |
| 3.40E-05 | 2.05E-04 | 0.000649 | 0        | 6.80E-05 | 3.04E-04 | 1.50E-05 | 0        | 2.33E-04 | 2.05E-04 | 0.001447 | 5.21E-04 | 9.30E-05 | 6.12E-04 | 9.10E-05 |
| 3.30E-05 | 2.94E-04 | 0        | 0.001047 | 0        | 0        | 0.006033 | 0        | 0        | 0        | 2.08E-04 | 8.69E-04 | 3.26E-04 | 4.66E-04 | 3.30E-04 |
| 0        | 0.004073 | 2.80E-05 | 0.005115 | 0        | 0        | 0        | 0        | 0        | 0        | 2.91E-04 | 0        | 0        | 8.40E-05 | 5.00E-05 |
| 1.98E-04 | 3.37E-04 | 5.00E-05 | 0.001075 | 6.60E-05 | 2.26E-04 | 0.005365 | 0        | 0        | 0        | 2.76E-04 | 0.001444 | 9.10E-04 | 1.90E-04 | 1.16E-04 |
| 0        | 2.60E-05 | 1.68E-04 | 4.60E-05 | 4.25E-04 | 0        | 2.61E-04 | 3.80E-05 | 0        | 2.67E-04 | 3.10E-05 | 1.92E-04 | 0        | 6.90E-05 | 6.70E-05 |
| 0        | 5.00E-05 | 0        | 0        | 0        | 0        | 0        | 0        | 0        | 0        | 0        | 2.03E-04 | 0        | 0        | 0        |
| 0        | 0        | 6.10E-05 | 0        | 0        | 0        | 3.50E-05 | 0        | 0        | 0        | 0        | 3.80E-05 | 0        | 0        | 0        |
| 0.007393 | 0.006063 | 0.009682 | 0.008994 | 0.007593 | 0.009804 | 0.02786  | 0.00556  | 0.008449 | 0.002344 | 0.008284 | 0.029545 | 0.005596 | 0.009028 | 0.009721 |

|          |          |          |          |          |          |          |          |          |          |          |          |          |          |          |
|----------|----------|----------|----------|----------|----------|----------|----------|----------|----------|----------|----------|----------|----------|----------|
| HC148    | HC088    | HC027    | HC063    | HC084    | HC026    | HC037    | HC100    | HC139    | HC104    | HC123    | HC095    | HC141    | HC025    | HC082    |
| 0.072072 | 0.071666 | 0.071218 | 0.070909 | 0.069959 | 0.069372 | 0.068815 | 0.062001 | 0.050518 | 0.042585 | 0.041723 | 0.040504 | 0.039319 | 0.038459 | 0.038404 |
| 0.61033  | 0.169964 | 0.012146 | 0.077684 | 0.004963 | 0.48601  | 0.398183 | 0.26896  | 0.117916 | 0.003957 | 0.173783 | 0.025186 | 0.255736 | 0.012854 | 0.011352 |
| 0.003377 | 0.068792 | 0.226174 | 0.040163 | 0.040076 | 0.094381 | 0.042626 | 0.020518 | 0.035219 | 0.303008 | 0.24563  | 0.05909  | 0.020233 | 0.132839 | 0.009991 |
| 0.009264 | 0.047572 | 0.311051 | 0.159344 | 0.202884 | 0.014453 | 0.062295 | 0.050278 | 0.01133  | 0.036315 | 0.037719 | 0.209908 | 0.042841 | 0.233812 | 0.037428 |
| 0.094707 | 0.092478 | 0.036788 | 0.03842  | 0.029687 | 0.081125 | 0.007111 | 0.111239 | 0.269453 | 0.110202 | 0.285809 | 0.10635  | 0.317043 | 0.22565  | 0.033215 |
| 0.114179 | 0.088012 | 0.004444 | 0.031006 | 0.005742 | 0.086651 | 0.029554 | 0.038476 | 0.214749 | 0.051644 | 0.044024 | 0.127221 | 0.038231 | 0.018897 | 0.042582 |
| 0.002534 | 0.027492 | 0.048531 | 0.14778  | 0.109036 | 0.00649  | 0.21936  | 0.157807 | 0.006763 | 0.010932 | 0.02626  | 0.102258 | 0.080214 | 0.075223 | 0.048937 |
| 0.010198 | 0.056665 | 7.38E-04 | 0.002412 | 0.001214 | 0.005395 | 0.003859 | 0.004485 | 0.015441 | 0.006617 | 0.021795 | 0.013925 | 4.58E-04 | 0.006392 | 0.006378 |
| 0.003327 | 0.044039 | 0.020762 | 0.18064  | 0.317363 | 0.004391 | 0.037292 | 0.027045 | 0.005849 | 0.079294 | 0.006119 | 0.080994 | 0.001206 | 0.047894 | 0.018015 |
| 0.018899 | 0.10015  | 0.142443 | 0.010805 | 0.064184 | 0.05705  | 0.020598 | 0.127613 | 0.128445 | 0.213816 | 0.02937  | 0.007568 | 0.138589 | 0.020974 | 0.009284 |
| 8.75E-04 | 0.014564 | 0.006922 | 0.050852 | 0.018903 | 0.005532 | 0.027422 | 0.019953 | 0.008816 | 0.008443 | 0.007056 | 0.016174 | 0.002061 | 0.031527 | 0.017186 |
| 0.006152 | 0.003638 | 0.028032 | 0.026937 | 0.016005 | 0.014051 | 0.004217 | 0.020226 | 0.009584 | 0.038469 | 0.015891 | 0.010534 | 0.019799 | 0.014216 | 1.08E-04 |
| 0.005484 | 0.010682 | 0.007062 | 0.005419 | 0.00547  | 0.006704 | 0.005208 | 0.005238 | 0.012092 | 0.008905 | 0.006572 | 0.00747  | 5.49E-04 | 0.013166 | 0.003615 |
| 0        | 0        | 1.10E-04 | 4.88E-04 | 0.005476 | 2.08E-04 | 0        | 6.45E-04 | 0        | 0        | 2.14E-04 | 0.001767 | 8.20E-05 | 0.002324 | 0.499534 |
| 0.007248 | 0.012521 | 0.003591 | 0.011696 | 0.011245 | 0.010783 | 9.36E-04 | 0.00803  | 0.022175 | 0.010352 | 0.01013  | 0.023212 | 8.37E-04 | 0.028208 | 0.004225 |
| 0.006142 | 0.01203  | 0.005556 | 0.007972 | 0.004838 | 0.001678 | 6.37E-04 | 0.002543 | 0.005582 | 8.84E-04 | 1.70E-05 | 0.016723 | 1.91E-04 | 2.85E-04 | 0.001624 |
| 0.006852 | 0.004816 | 0.004705 | 0.013064 | 0.00673  | 0.004995 | 0.001614 | 0.003924 | 0.001653 | 0.009908 | 0.004479 | 0.0269   | 0        | 0.002086 | 0.005026 |
| 0.004458 | 0.011489 | 0.008749 | 0.004527 | 0.017286 | 0.002564 | 0.006174 | 0.005505 | 0.003254 | 0.014852 | 0.00418  | 0.021321 | 8.74E-04 | 0.014336 | 0.002739 |
| 0.001106 | 0.017771 | 0.009694 | 0.011079 | 0.012735 | 8.82E-04 | 0.006044 | 0.008113 | 0.015136 | 0.010319 | 0.00207  | 0.037512 | 0.003403 | 0.011614 | 0.00582  |
| 3.10E-05 | 7.49E-04 | 0.003513 | 0.033613 | 0.024416 | 1.74E-04 | 0.003944 | 0.00896  | 1.68E-04 | 0.003244 | 6.06E-04 | 0.00553  | 3.17E-04 | 0.003457 | 7.70E-05 |
| 8.63E-04 | 0.00226  | 7.23E-04 | 0.018472 | 0.003212 | 0.001201 | 0.003645 | 0.001899 | 0.00477  | 8.85E-04 | 0.01206  | 0.013787 | 0        | 0.004689 | 0.002218 |
| 0.004237 | 0.041136 | 1.04E-04 | 0.002586 | 6.60E-05 | 8.25E-04 | 1.44E-04 | 7.15E-04 | 0.013403 | 0        | 9.33E-04 | 0.001274 | 0.003455 | 0.007784 | 0.001797 |
| 0.002494 | 0.001616 | 0.003015 | 2.58E-04 | 0.00506  | 9.55E-04 | 0.001745 | 4.71E-04 | 0.001241 | 0.005425 | 0.001661 | 0.002421 | 0        | 0.008146 | 0.002056 |
| 0        | 0.021067 | 0        | 4.50E-05 | 0        | 0        | 0.032419 | 0        | 0.00343  | 0        | 0        | 0        | 0        | 3.10E-05 | 0        |
| 2.48E-04 | 3.66E-04 | 0.015353 | 0.0098   | 0.002937 | 0.002969 | 5.91E-04 | 0.002802 | 8.98E-04 | 0.009145 | 0.004631 | 0.003364 | 4.42E-04 | 0.006568 | 0        |
| 6.58E-04 | 0.010891 | 0        | 7.24E-04 | 1.20E-04 | 0        | 2.55E-04 | 7.76E-04 | 0.00309  | 0        | 0.001121 | 1.98E-04 | 0.00149  | 3.80E-05 | 2.00E-05 |
| 0.006886 | 0.002037 | 0.004315 | 0.002101 | 2.38E-04 | 0.021214 | 0.001107 | 0.01408  | 0.007116 | 0.002866 | 0.003937 | 2.06E-04 | 0.020944 | 1.99E-04 | 1.70E-05 |
| 0        | 1.53E-04 | 5.00E-05 | 1.26E-04 | 0        | 0        | 2.82E-04 | 0        | 0        | 1.22E-04 | 9.31E-04 | 1.00E-04 | 0        | 2.40E-05 | 0        |
| 6.10E-05 | 4.41E-04 | 0.008673 | 0.014763 | 0.006567 | 5.40E-04 | 0.001547 | 0.003615 | 4.59E-04 | 0.002014 | 7.98E-04 | 0.004276 | 6.60E-04 | 0.007104 | 2.54E-04 |
| 0        | 0.01439  | 4.20E-05 | 6.59E-04 | 1.21E-04 | 5.83E-04 | 2.53E-04 | 3.65E-04 | 0.003013 | 1.11E-04 | 0        | 0.002983 | 2.86E-04 | 2.40E-05 | 0.004962 |
| 0        | 9.62E-04 | 5.33E-04 | 0.002096 | 0.001165 | 2.47E-04 | 0.001698 | 6.58E-04 | 7.50E-05 | 8.69E-04 | 0.001791 | 9.86E-04 | 0        | 1.88E-04 | 4.18E-04 |
| 0        | 6.60E-05 | 0        | 0.004587 | 3.20E-04 | 0        | 0.003273 | 2.91E-04 | 0        | 0        | 0        | 7.90E-05 | 1.93E-04 | 4.00E-05 | 0.00581  |
| 0.003444 | 0.001383 | 0.00159  | 0.001089 | 2.71E-04 | 0.010928 | 3.50E-04 | 0.008203 | 0.005076 | 0.001099 | 0.002287 | 7.00E-05 | 0.005156 | 3.91E-04 | 2.27E-04 |
| 0.001278 | 0.005742 | 1.06E-04 | 5.10E-04 | 6.50E-05 | 7.50E-04 | 6.20E-04 | 0.001359 | 0.012729 | 4.64E-04 | 0        | 0.012479 | 3.00E-05 | 0.010408 | 5.13E-04 |
| 0        | 0.00233  | 0        | 9.50E-05 | 1.48E-04 | 1.74E-04 | 7.50E-05 | 9.25E-04 | 0        | 0        | 0        | 7.18E-04 | 0        | 6.90E-05 | 0        |
| 0        | 0.003428 | 5.50E-05 | 0        | 0        | 2.71E-04 | 4.82E-04 | 0        | 0        | 0        | 1.64E-04 | 2.00E-05 | 1.24E-04 | 0        | 0        |
| 2.79E-04 | 0.004465 | 0        | 0        | 6.80E-05 | 5.66E-04 | 7.10E-05 | 1.84E-04 | 4.58E-04 | 0        | 1.40E-05 | 0.001082 | 1.82E-04 | 1.19E-04 | 1.16E-04 |
| 0        | 0.00187  | 0        | 8.60E-05 | 3.85E-04 | 1.21E-04 | 4.10E-05 | 1.77E-04 | 3.18E-04 | 5.20E-05 | 5.10E-05 | 0.001135 | 6.70E-05 | 1.58E-04 | 8.24E-04 |
| 0        | 0.002098 | 6.53E-04 | 0        | 2.40E-05 | 0        | 9.10E-05 | 2.56E-04 | 0        | 0        | 0        | 2.00E-05 | 0        | 0        | 0        |
| 3.00E-05 | 0        | 0        | 3.70E-05 | 6.14E-04 | 0        | 0        | 1.35E-04 | 0        | 0        | 2.30E-05 | 4.95E-04 | 0        | 3.91E-04 | 0.061241 |
| 1.21E-04 | 3.45E-04 | 0.007229 | 0.002124 | 0.001992 | 5.84E-04 | 3.56E-04 | 0.001241 | 0.001016 | 0.005715 | 5.46E-04 | 0.002971 | 3.80E-04 | 0.00263  | 0        |
| 0        | 0        | 0        | 1.52E-04 | 6.53E-04 | 0        | 0        | 1.11E-04 | 0        | 0        | 9.90E-05 | 3.87E-04 | 0        | 4.12E-04 | 0.065501 |
| 3.00E-05 | 1.71E-04 | 5.46E-04 | 0.004353 | 9.88E-04 | 1.57E-04 | 2.30E-04 | 9.06E-04 | 2.35E-04 | 5.90E-04 | 2.28E-04 | 0.001087 | 4.29E-04 | 0.002925 | 0        |
| 0        | 0        | 1.09E-04 | 0        | 6.75E-04 | 0        | 0        | 7.50E-05 | 0        | 0        | 7.50E-05 | 2.24E-04 | 0        | 2.03E-04 | 0.035193 |
| 1.68E-04 | 0.002075 | 0        | 1.06E-04 | 3.90E-05 | 3.99E-04 | 0        | 4.72E-04 | 1.12E-04 | 0        | 0.001125 | 0        | 3.05E-04 | 3.00E-05 | 2.70E-05 |
| 5.90E-05 | 0.00136  | 4.90E-05 | 8.80E-05 | 5.34E-04 | 2.09E-04 | 7.30E-05 | 5.53E-04 | 1.08E-04 | 4.41E-04 | 5.60E-05 | 9.91E-04 | 3.70E-05 | 6.50E-05 | 4.95E-04 |
| 0        | 0.002604 | 0        | 0        | 4.90E-05 | 0        | 0.001708 | 0        | 1.84E-04 | 0        | 0        | 0        | 7.60E-05 | 0        | 2.10E-05 |
| 1.83E-04 | 0.00281  | 0        | 1.46E-04 | 3.14E-04 | 0        | 2.27E-04 | 8.28E-04 | 5.02E-04 | 0        | 1.94E-04 | 6.62E-04 | 6.90E-05 | 2.51E-04 | 1.75E-04 |
| 0        | 3.41E-04 | 0        | 1.84E-04 | 0        | 0        | 1.34E-04 | 4.00E-05 | 0        | 4.10E-05 | 0        | 5.70E-05 | 0        | 9.20E-05 | 1.05E-04 |
| 0        | 0        | 0        | 0        | 0        | 0        | 0        | 4.20E-05 | 0        | 0        | 1.65E-04 | 0        | 3.70E-05 | 0        | 0        |
| 0        | 2.60E-05 | 0        | 0        | 0        | 0        | 0        | 0        | 0        | 0        | 0        | 0        | 0        | 0        | 0        |
| 0.001726 | 0.018477 | 0.004626 | 0.010003 | 0.005163 | 0.004418 | 0.002694 | 0.007262 | 0.007624 | 0.006415 | 0.003663 | 0.007781 | 0.003655 | 0.012808 | 0.022247 |

| HC083    | HC103    | HC054    | HC045    | HC006    | HC112    | HC047    | HC089    | HC024    | HC135    | HC101    | HC108    | HC150    | HC078    | HC130    |
|----------|----------|----------|----------|----------|----------|----------|----------|----------|----------|----------|----------|----------|----------|----------|
| 0.03708  | 0.036073 | 0.033874 | 0.033066 | 0.027513 | 0.02734  | 0.026144 | 0.025097 | 0.022193 | 0.020763 | 0.01963  | 0.01848  | 0.017253 | 0.016579 | 0.015558 |
| 0.008984 | 0.223248 | 0.325912 | 0.193512 | 0.021314 | 0.32641  | 0.022826 | 0.073792 | 0.063303 | 0.212987 | 0.377657 | 0.024364 | 0.279886 | 0.076734 | 0.328792 |
| 0.092555 | 0.048841 | 0.029605 | 0.043637 | 0.076416 | 0.035899 | 0.171673 | 0.031379 | 0.025159 | 0.076989 | 0.059528 | 0.081205 | 0.032236 | 0.010331 | 0.03616  |
| 0.103503 | 0.016643 | 0.009234 | 0.076421 | 0.169053 | 0.025707 | 0.054366 | 0.238187 | 0.082826 | 0.137663 | 0.034139 | 0.05681  | 0.041839 | 0.353641 | 0.02262  |
| 0.383416 | 1.55E-04 | 0.101224 | 0.314005 | 0.093351 | 0.239622 | 0.371803 | 0.143634 | 0.025145 | 0.025303 | 0.106704 | 0.027185 | 0.271961 | 0.006996 | 0.170108 |
| 0.012674 | 5.60E-05 | 0.288093 | 0.065073 | 0.017026 | 0.132208 | 0.066673 | 0.019385 | 0.01569  | 0.04134  | 0.153185 | 0.125212 | 0.131769 | 0.008381 | 0.015622 |
| 0.051362 | 0.172007 | 0.020103 | 0.057842 | 0.132805 | 0.038274 | 0.057997 | 0.091877 | 0.432754 | 0.101805 | 0.033116 | 0.043878 | 0.031656 | 0.287517 | 0.057393 |
| 0.003744 | 1.04E-04 | 0.045805 | 0.005464 | 0.001261 | 0.016379 | 0.003669 | 0.018138 | 0.002861 | 0.035973 | 0.009909 | 0.032444 | 0.009615 | 0.008277 | 0.002825 |
| 0.077051 | 0.018213 | 0.005493 | 0.020516 | 0.126923 | 0.004531 | 0.045168 | 0.042824 | 0.042805 | 0.055257 | 0.038005 | 0.053004 | 0.007615 | 0.094621 | 0.016336 |
| 0.056478 | 0.345561 | 0.024852 | 0.06891  | 0.180217 | 0.06327  | 0.017928 | 0.045805 | 0.080545 | 0.013388 | 0.042114 | 0.090848 | 0.048706 | 0.006382 | 0.218478 |
| 0.008115 | 0.001256 | 0.003837 | 0.009014 | 0.011492 | 0.009562 | 0.022928 | 0.043898 | 0.082882 | 0.04126  | 0.016971 | 0.009736 | 0.009578 | 0.016217 | 0.001868 |
| 0.028876 | 0.030891 | 0.005712 | 0.008963 | 0.032447 | 0.008254 | 0.017337 | 0.008824 | 0.025198 | 0.004851 | 0.021001 | 0.001808 | 0.021838 | 0.019559 | 0.016745 |
| 0.009189 | 0        | 0.012465 | 0.014565 | 0.005407 | 0.012059 | 0.003728 | 0.004428 | 0.002921 | 0.010067 | 0.01463  | 0.015395 | 0.010865 | 0.00392  | 0.01095  |
| 3.27E-04 | 5.30E-05 | 0        | 4.42E-04 | 1.75E-04 | 0        | 0.001281 | 0.019017 | 0.001204 | 0        | 2.53E-04 | 0.112633 | 1.34E-04 | 8.26E-04 | 1.27E-04 |
| 0.033969 | 0        | 0.005084 | 0.015062 | 0.018534 | 0.01014  | 0.011064 | 0.004534 | 0.003415 | 0.003216 | 0.005928 | 0.105603 | 0.005721 | 0.002542 | 0.001927 |
| 0.003038 | 0.002071 | 0.006817 | 0.004685 | 0.006418 | 8.51E-04 | 0.005212 | 0.009032 | 0.001315 | 0.005719 | 0.003704 | 0.00485  | 0.001542 | 0.003036 | 0.00111  |
| 0.007243 | 1.55E-04 | 0.001082 | 0.025121 | 0.005643 | 9.76E-04 | 0.006972 | 0.002953 | 0.001164 | 0.002861 | 0.001297 | 0.021847 | 0.006003 | 0.002116 | 0.002376 |
| 0.003798 | 2.58E-04 | 0.005255 | 0.006709 | 0.007487 | 0.009967 | 0.011869 | 0.009547 | 8.20E-04 | 0.01495  | 0.007959 | 0.055278 | 0.002195 | 0.007633 | 0.009707 |
| 0.016378 | 4.16E-04 | 0.00191  | 0.003003 | 0.01165  | 0.003974 | 0.030206 | 0.030474 | 0.005236 | 0.009238 | 0.002404 | 0.012456 | 0.005653 | 0.014903 | 0.003636 |
| 0.006866 | 0.014906 | 5.94E-04 | 9.24E-04 | 0.015599 | 3.62E-04 | 0.003409 | 0.00282  | 0.027911 | 0.002939 | 0.004304 | 5.72E-04 | 0.001571 | 0.029477 | 0.003128 |
| 0.011469 | 9.95E-04 | 0.002135 | 0.005706 | 0.004975 | 0.002068 | 0.008562 | 0.009221 | 0.005645 | 0.004409 | 0.006727 | 0.006728 | 0.002825 | 0.001881 | 0.001391 |
| 0.001513 | 0.001692 | 0.018217 | 0.001815 | 5.04E-04 | 0.001816 | 5.54E-04 | 0.013365 | 9.73E-04 | 0.001059 | 0.003459 | 0.001888 | 0.005978 | 0.00167  | 0.001894 |
| 0.001858 | 0        | 0.004747 | 0.001033 | 0.002835 | 5.37E-04 | 0.005181 | 7.13E-04 | 7.60E-05 | 0.002109 | 0.001967 | 0.008019 | 0.00426  | 1.11E-04 | 0.013064 |
| 0        | 0        | 0.001772 | 0        | 0        | 0.007247 | 0        | 0.057372 | 0        | 0.129984 | 0        | 0        | 0        | 0        | 0        |
| 0.007205 | 0.002493 | 5.56E-04 | 0.00172  | 0.004994 | 9.43E-04 | 0.004689 | 0.001321 | 0.007739 | 0.00117  | 0.002574 | 6.94E-04 | 0.002466 | 0.002978 | 8.85E-04 |
| 7.75E-04 | 0        | 0.0035   | 4.41E-04 | 4.70E-04 | 0.001069 | 4.00E-05 | 0.003816 | 4.85E-04 | 2.52E-04 | 1.41E-04 | 5.97E-04 | 0.001124 | 1.40E-04 | 6.28E-04 |
| 0.001132 | 0.040907 | 0.004126 | 0.00548  | 0.00454  | 0.007778 | 0.001062 | 6.54E-04 | 0.004335 | 3.26E-04 | 0.008625 | 4.40E-04 | 0.00797  | 0.001089 | 0.027251 |
| 5.00E-05 | 0        | 0        | 2.40E-05 | 0        | 4.00E-05 | 0        | 1.11E-04 | 3.40E-05 | 3.42E-04 | 2.00E-05 | 7.20E-05 | 0        | 0        | 0        |
| 0.002248 | 4.64E-04 | 1.87E-04 | 0.001148 | 0.007073 | 5.84E-04 | 0.003267 | 0.005785 | 0.01301  | 0.003161 | 0.002088 | 3.06E-04 | 0.001797 | 0.010504 | 2.20E-04 |
| 0.002107 | 0        | 0.019516 | 9.78E-04 | 0        | 0.001474 | 9.79E-04 | 0.008151 | 6.89E-04 | 1.97E-04 | 0.001712 | 0.003979 | 0.004989 | 1.21E-04 | 8.13E-04 |
| 6.98E-04 | 0        | 3.21E-04 | 3.40E-04 | 7.21E-04 | 1.70E-04 | 9.19E-04 | 9.49E-04 | 5.33E-04 | 0.002416 | 6.43E-04 | 6.42E-04 | 6.22E-04 | 0.001303 | 2.10E-04 |
| 5.70E-05 | 0        | 0        | 0.004028 | 4.01E-04 | 0        | 2.71E-04 | 2.15E-04 | 1.36E-04 | 2.69E-04 | 9.79E-04 | 2.13E-04 | 0        | 1.58E-04 | 0        |
| 3.81E-04 | 0.03905  | 0.001374 | 9.21E-04 | 0.00168  | 0.002152 | 6.20E-04 | 4.65E-04 | 0.002697 | 8.80E-05 | 0.004547 | 5.77E-04 | 0.004468 | 2.03E-04 | 0.009294 |
| 0.01022  | 0        | 0.002833 | 4.35E-04 | 3.20E-05 | 0.001272 | 0.003989 | 0.00857  | 0.002437 | 0.00365  | 0.002543 | 0.002104 | 0.012789 | 0        | 0.002464 |
| 0        | 0        | 0        | 1.60E-05 | 0        | 0        | 3.40E-05 | 5.60E-05 | 3.30E-05 | 3.54E-04 | 0        | 0.001096 | 0        | 2.02E-04 | 7.50E-05 |
| 0        | 0        | 5.86E-04 | 1.20E-04 | 4.10E-05 | 0        | 0        | 4.10E-05 | 0        | 0.001132 | 0        | 9.20E-05 | 4.90E-05 | 1.11E-04 | 3.60E-05 |
| 1.37E-04 | 0        | 0.003351 | 0.001207 | 1.62E-04 | 1.14E-04 | 5.50E-05 | 4.53E-04 | 2.00E-05 | 5.22E-04 | 0.001413 | 5.55E-04 | 0.001016 | 0        | 1.14E-04 |
| 8.41E-04 | 0        | 5.32E-04 | 5.89E-04 | 1.79E-04 | 0.00093  | 7.20E-05 | 3.40E-04 | 4.22E-04 | 7.70E-04 | 2.53E-04 | 0.00102  | 4.42E-04 | 4.34E-04 | 2.06E-04 |
| 0        | 0        | 0        | 0        | 0        | 0        | 0        | 2.30E-05 | 3.20E-05 | 5.24E-04 | 0        | 6.58E-04 | 0        | 2.90E-04 | 0        |
| 1.27E-04 | 0        | 0        | 2.07E-04 | 4.30E-05 | 0        | 2.43E-04 | 0.001934 | 1.43E-04 | 0        | 0        | 0.010356 | 0        | 1.46E-04 | 4.60E-05 |
| 0.003688 | 2.51E-04 | 2.31E-04 | 2.02E-04 | 0.00267  | 3.15E-04 | 0.006602 | 0.001089 | 8.76E-04 | 3.23E-04 | 9.13E-04 | 3.51E-04 | 9.03E-04 | 0.003428 | 2.81E-04 |
| 4.80E-05 | 0        | 0        | 1.66E-04 | 3.30E-05 | 0        | 1.14E-04 | 7.38E-04 | 0        | 0        | 0        | 0.006876 | 0        | 0        | 0        |
| 0.00146  | 3.46E-04 | 0        | 2.21E-04 | 5.24E-04 | 2.07E-04 | 7.04E-04 | 0.001485 | 0.006428 | 3.46E-04 | 7.91E-04 | 4.30E-05 | 7.59E-04 | 0.001764 | 9.40E-05 |
| 2.30E-05 | 0        | 0        | 1.42E-04 | 3.30E-05 | 0        | 7.50E-05 | 9.72E-04 | 0        | 0        | 2.20E-05 | 0.00831  | 0        | 1.03E-04 | 0        |
| 1.60E-05 | 5.20E-05 | 5.23E-04 | 5.00E-05 | 0        | 7.00E-05 | 4.40E-05 | 1.44E-04 | 1.11E-04 | 1.19E-04 | 8.33E-04 | 1.80E-05 | 9.87E-04 | 1.97E-04 | 1.20E-04 |
| 8.80E-05 | 0        | 4.31E-04 | 1.95E-04 | 2.10E-04 | 3.10E-04 | 1.53E-04 | 7.37E-04 | 0        | 6.60E-04 | 1.18E-04 | 0.012795 | 2.18E-04 | 0        | 0        |
| 0        | 0        | 3.40E-05 | 0        | 0        | 5.46E-04 | 0        | 2.20E-05 | 0        | 0.011736 | 0        | 2.70E-05 | 0        | 0        | 0        |
| 5.83E-04 | 0        | 2.51E-04 | 1.25E-04 | 1.39E-04 | 7.23E-04 | 4.85E-04 | 0.001272 | 0        | 3.68E-04 | 1.71E-04 | 0.012337 | 2.11E-04 | 0        | 4.69E-04 |
| 4.70E-05 | 0        | 2.90E-05 | 7.50E-05 | 3.90E-05 | 0        | 1.80E-04 | 1.91E-04 | 0        | 3.34E-04 | 1.19E-04 | 3.43E-04 | 0        | 0        | 0        |
| 0        | 0        | 0        | 0        | 0        | 0        | 0        | 6.20E-05 | 4.10E-05 | 0        | 0        | 0        | 0        | 0        | 0        |
| 0        | 0        | 0        | 0        | 0        | 0        | 0        | 0        | 0        | 0        | 0        | 0        | 0        | 0        | 0        |
| 0.008583 | 0.002843 | 0.007797 | 0.005682 | 0.006971 | 0.00385  | 0.008853 | 0.014088 | 0.007758 | 0.016811 | 0.006904 | 0.025256 | 0.008491 | 0.003479 | 0.004979 |

| HC127    | HC028    | HC062    | HC058    | HC110    | HC126    | HC087    |
|----------|----------|----------|----------|----------|----------|----------|
| 0.014407 | 0.013752 | 0.009179 | 0.008952 | 0.00763  | 0.002998 | 0.00246  |
| 0.00596  | 0.042387 | 0.083943 | 0.006021 | 0.052989 | 0.289638 | 0.018754 |
| 0.020852 | 0.065904 | 0.032027 | 0.003055 | 0.01219  | 0.049281 | 0.027636 |
| 0.252583 | 0.024403 | 0.042929 | 0.117751 | 0.395418 | 0.029744 | 0.064374 |
| 0.097317 | 0.03223  | 0.290409 | 0.026693 | 0.005316 | 0.362335 | 0.245608 |
| 0.007278 | 0.118357 | 0.046771 | 0.014358 | 0.007083 | 0.037828 | 0.251125 |
| 0.124482 | 0.041754 | 0.080544 | 0.072244 | 0.309505 | 0.093433 | 0.019576 |
| 0.001581 | 0.00356  | 9.27E-04 | 0.007739 | 3.60E-04 | 6.80E-04 | 0.042417 |
| 0.11737  | 0.024313 | 0.046908 | 0.052518 | 0.102982 | 0.00612  | 0.011985 |
| 0.135091 | 0.532695 | 0.249842 | 0.003885 | 0.020533 | 0.009037 | 0.168652 |
| 0.043861 | 0.008886 | 0.018394 | 0.054037 | 0.011834 | 0.004175 | 0.012106 |
| 0.035536 | 0.017774 | 0.02444  | 0.001849 | 0.02045  | 0.02165  | 0.013434 |
| 0.005893 | 0.00367  | 0.002977 | 0.005374 | 6.04E-04 | 0.008923 | 0.010676 |
| 5.93E-04 | 2.27E-04 | 0.001076 | 0.490151 | 0.001632 | 6.75E-04 | 0        |
| 0.011744 | 0.010874 | 0.00299  | 0.005549 | 3.89E-04 | 0.018851 | 0.001896 |
| 0.00585  | 9.39E-04 | 7.40E-04 | 0.002789 | 8.20E-05 | 2.69E-04 | 0.001891 |
| 0.002859 | 0.003814 | 8.02E-04 | 0.001113 | 6.09E-04 | 0.003834 | 1.25E-04 |
| 0.002727 | 0.008239 | 0.003777 | 0.00466  | 0.004618 | 0.005315 | 0.01924  |
| 0.039035 | 0.010113 | 0.00544  | 0.011744 | 0.005869 | 0.001062 | 0.039262 |
| 0.01781  | 0.002354 | 0.006195 | 0.001484 | 0.02033  | 0.005033 | 4.35E-04 |
| 0.003178 | 0.002554 | 0.001245 | 0.00637  | 1.16E-04 | 0.002978 | 0.001299 |
| 4.78E-04 | 7.60E-05 | 0.00171  | 2.62E-04 | 1.02E-04 | 4.50E-04 | 0.003505 |
| 6.14E-04 | 1.38E-04 | 5.50E-05 | 0.003622 | 1.11E-04 | 0.003464 | 0.004451 |
| 0        | 0        | 0        | 1.80E-05 | 0        | 0        | 0.010571 |
| 0.004896 | 0.001727 | 0.001304 | 3.74E-04 | 0.001672 | 0.004414 | 8.15E-04 |
| 3.35E-04 | 4.40E-05 | 1.42E-04 | 9.70E-05 | 0        | 4.00E-05 | 3.70E-04 |
| 0.002105 | 0.012906 | 0.010281 | 0        | 0.001558 | 0.005082 | 0.002625 |
| 0        | 0        | 0        | 1.80E-05 | 0        | 0        | 0        |
| 0.018231 | 0.001246 | 0.002693 | 0.002416 | 0.00791  | 0.001541 | 0.001337 |
| 0        | 2.92E-04 | 0.001311 | 9.88E-04 | 0        | 0.007197 | 0.006355 |
| 1.01E-04 | 6.00E-05 | 1.51E-04 | 5.46E-04 | 4.90E-05 | 9.84E-04 | 2.40E-05 |
| 3.10E-05 | 0        | 0.012771 | 3.46E-04 | 5.60E-05 | 0        | 5.00E-05 |
| 4.35E-04 | 0.00754  | 0.005135 | 2.26E-04 | 6.78E-04 | 0.002019 | 8.63E-04 |
| 0.003044 | 5.10E-04 | 0.002307 | 0.001931 | 0        | 0.005115 | 0.001147 |
| 3.40E-05 | 0        | 9.50E-05 | 0        | 0        | 0        | 2.90E-05 |
| 0        | 4.50E-05 | 0        | 0        | 1.86E-04 | 0        | 2.80E-05 |
| 0        | 0        | 0        | 4.10E-05 | 0        | 7.20E-04 | 6.54E-04 |
| 2.23E-04 | 7.80E-05 | 3.10E-05 | 5.88E-04 | 2.90E-05 | 6.70E-04 | 3.49E-04 |
| 0        | 2.60E-05 | 0        | 1.00E-05 | 0        | 1.57E-04 | 0        |
| 3.50E-05 | 2.80E-05 | 9.00E-05 | 0.036782 | 1.40E-04 | 0        | 0        |
| 0.006167 | 0.001803 | 5.10E-04 | 1.21E-04 | 0.001065 | 5.44E-04 | 0.001251 |
| 2.80E-05 | 0        | 5.20E-05 | 0.021306 | 1.67E-04 | 7.30E-05 | 0        |
| 0.006414 | 4.97E-04 | 0.001287 | 9.58E-04 | 0.001508 | 8.92E-04 | 5.93E-04 |
| 1.11E-04 | 2.40E-05 | 1.29E-04 | 0.016789 | 7.10E-05 | 7.70E-05 | 0        |
| 0        | 0        | 5.70E-05 | 1.70E-05 | 0        | 3.14E-04 | 0        |
| 2.80E-05 | 1.35E-04 | 0        | 4.90E-05 | 3.30E-05 | 3.12E-04 | 7.80E-05 |
| 0        | 0        | 0        | 0        | 0        | 0        | 5.76E-04 |
| 0        | 2.04E-04 | 4.42E-04 | 2.00E-05 | 0        | 4.40E-04 | 5.59E-04 |
| 0        | 0        | 5.40E-05 | 0        | 1.80E-05 | 8.60E-05 | 0        |
| 0        | 0        | 0        | 0        | 0        | 0        | 0        |
| 3.00E-05 | 0        | 0        | 1.60E-05 | 0        | 0        | 0        |
| 0.010653 | 0.003822 | 0.007838 | 0.014123 | 0.004108 | 0.01155  | 0.010819 |

**Table S17. The abundance and composition at the phylum level of each sample among CP (n=72), CPR (n=22), and HC (n=150) groups.**

| ID                     | CP41     | CP34     | CP04     | CP66     | CP70     | CP69     | CP02     | CP49     | CP25     | CP71     | CP60     | CP29     | CP05     |
|------------------------|----------|----------|----------|----------|----------|----------|----------|----------|----------|----------|----------|----------|----------|
| Bacteroidetes          | 0.965714 | 0.895192 | 0.889363 | 0.827956 | 0.682647 | 0.665997 | 0.628216 | 0.581694 | 0.557189 | 0.5547   | 0.505731 | 0.426072 | 0.406875 |
| Firmicutes             | 0.024027 | 0.018771 | 0.022598 | 0.057528 | 0.092962 | 0.261312 | 0.240143 | 0.246951 | 0.186538 | 0.313522 | 0.459238 | 0.550191 | 0.160054 |
| Proteobacteria         | 3.58E-04 | 6.83E-04 | 0.001006 | 0.001624 | 0.010973 | 0.001364 | 0.001824 | 0.012863 | 0.089651 | 0.007199 | 0.002062 | 0.00295  | 0.135894 |
| Actinobacteria         | 0.008035 | 0.084162 | 8.37E-04 | 0.10323  | 0.014359 | 0.047078 | 0.116379 | 0.108703 | 0.127065 | 0.099308 | 0.02699  | 0.013175 | 0.172883 |
| Fusobacteria           | 0.001402 | 2.86E-04 | 0.086078 | 0.001144 | 0.198664 | 0.020859 | 0.00791  | 0.029184 | 0.009636 | 0.017947 | 6.54E-04 | 0.003158 | 0.095833 |
| Bacteria_unclassified  | 4.64E-04 | 6.56E-04 | 1.18E-04 | 0.002534 | 9.90E-05 | 0.002995 | 0.00545  | 0.001366 | 0.024143 | 0.00203  | 0.005325 | 0.004454 | 0.028333 |
| Candidate_division_TM7 | 0        | 2.50E-04 | 0        | 0.005953 | 1.53E-04 | 2.93E-04 | 7.80E-05 | 0.01742  | 0.005778 | 0.005279 | 0        | 0        | 0        |
| Candidate_division_SR1 | 0        | 0        | 0        | 0        | 0        | 1.02E-04 | 0        | 0.001607 | 0        | 0        | 0        | 0        | 1.28E-04 |
| Cyanobacteria          | 0        | 0        | 0        | 3.10E-05 | 5.50E-05 | 0        | 0        | 1.74E-04 | 0        | 0        | 0        | 0        | 0        |
| Spirochaetae           | 0        | 0        | 0        | 0        | 4.20E-05 | 0        | 0        | 1.90E-05 | 0        | 0        | 0        | 0        | 0        |
| Tenericutes            | 0        | 0        | 0        | 0        | 0        | 0        | 0        | 0        | 0        | 1.50E-05 | 0        | 0        | 0        |
| Synergistetes          | 0        | 0        | 0        | 0        | 3.10E-05 | 0        | 0        | 0        | 0        | 0        | 0        | 0        | 0        |
| BD1-5                  | 0        | 0        | 0        | 0        | 0        | 0        | 0        | 0        | 0        | 0        | 0        | 0        | 0        |
| Chloroflexi            | 0        | 0        | 0        | 0        | 0        | 0        | 0        | 0        | 0        | 0        | 0        | 0        | 0        |
| Verrucomicrobia        | 0        | 0        | 0        | 0        | 1.50E-05 | 0        | 0        | 1.90E-05 | 0        | 0        | 0        | 0        | 0        |
| Deinococcus-Thermus    | 0        | 0        | 0        | 0        | 0        | 0        | 0        | 0        | 0        | 0        | 0        | 0        | 0        |
| Candidate_division_WS6 | 0        | 0        | 0        | 0        | 0        | 0        | 0        | 0        | 0        | 0        | 0        | 0        | 0        |
| Planctomycetes         | 0        | 0        | 0        | 0        | 0        | 0        | 0        | 0        | 0        | 0        | 0        | 0        | 0        |
| Lentisphaerae          | 0        | 0        | 0        | 0        | 0        | 0        | 0        | 0        | 0        | 0        | 0        | 0        | 0        |

| CP64     | CP45     | CP55     | CP43     | CP40     | CP32     | CP15     | CP20     | CP50     | CP28     | CP31     | CP53     | CP35     | CP14     | CP03     |
|----------|----------|----------|----------|----------|----------|----------|----------|----------|----------|----------|----------|----------|----------|----------|
| 0.396484 | 0.383231 | 0.362168 | 0.353238 | 0.349477 | 0.349127 | 0.334932 | 0.317053 | 0.310648 | 0.309    | 0.303943 | 0.287852 | 0.270659 | 0.265205 | 0.25249  |
| 0.202106 | 0.344721 | 0.394096 | 0.327211 | 0.419751 | 0.075598 | 0.420462 | 0.26724  | 0.356781 | 0.133261 | 0.252672 | 0.149705 | 0.563688 | 0.272316 | 0.539068 |
| 0.069534 | 0.027485 | 0.091192 | 0.00254  | 0.001553 | 0.398994 | 0.021792 | 0.019984 | 0.005424 | 0.016214 | 0.084721 | 0.385035 | 0.099942 | 0.086894 | 0.00782  |
| 0.077831 | 0.005724 | 0.068582 | 0.173112 | 0.200246 | 0.014927 | 0.027022 | 0.008639 | 0.320707 | 0.022408 | 0.028851 | 0.046112 | 0.063931 | 0.115127 | 0.086837 |
| 0.105975 | 0.229602 | 0.05946  | 0.133119 | 0.020156 | 0.149155 | 0.152747 | 0.374739 | 0.002927 | 0.51501  | 0.317266 | 0.110237 | 5.70E-04 | 0.220351 | 0.099    |
| 0.001977 | 0.006486 | 0.020026 | 0.009078 | 0.008688 | 0.011595 | 0.017836 | 0.001893 | 0.003405 | 0.003431 | 0.012402 | 0.007079 | 9.28E-04 | 0.00954  | 0.00228  |
| 0.14606  | 0.002671 | 0.004177 | 0.001702 | 1.29E-04 | 6.04E-04 | 0.002139 | 0.010146 | 0        | 6.00E-04 | 7.10E-05 | 0.012257 | 1.03E-04 | 0.024375 | 0.01179  |
| 3.30E-05 | 0        | 2.99E-04 | 0        | 0        | 0        | 0.02307  | 1.79E-04 | 0        | 0        | 7.40E-05 | 0.001276 | 0        | 0.006124 | 1.70E-05 |
| 0        | 0        | 0        | 0        | 0        | 0        | 0        | 0        | 7.20E-05 | 7.60E-05 | 0        | 0        | 1.17E-04 | 0        | 4.00E-04 |
| 0        | 5.30E-05 | 0        | 0        | 0        | 0        | 0        | 8.70E-05 | 3.60E-05 | 0        | 0        | 0        | 0        | 6.80E-05 | 1.44E-04 |
| 0        | 2.70E-05 | 0        | 0        | 0        | 0        | 0        | 0        | 0        | 0        | 0        | 1.25E-04 | 0        | 0        | 0        |
| 0        | 0        | 0        | 0        | 0        | 0        | 0        | 4.00E-05 | 0        | 0        | 0        | 0        | 4.50E-05 | 0        | 1.54E-04 |
| 0        | 0        | 0        | 0        | 0        | 0        | 0        | 0        | 0        | 0        | 0        | 3.22E-04 | 1.70E-05 | 0        | 0        |
| 0        | 0        | 0        | 0        | 0        | 0        | 0        | 0        | 0        | 0        | 0        | 0        | 0        | 0        | 0        |
| 0        | 0        | 0        | 0        | 0        | 0        | 0        | 0        | 0        | 0        | 0        | 0        | 0        | 0        | 0        |
| 0        | 0        | 0        | 0        | 0        | 0        | 0        | 0        | 0        | 0        | 0        | 0        | 0        | 0        | 0        |
| 0        | 0        | 0        | 0        | 0        | 0        | 0        | 0        | 0        | 0        | 0        | 0        | 0        | 0        | 0        |
| 0        | 0        | 0        | 0        | 0        | 0        | 0        | 0        | 0        | 0        | 0        | 0        | 0        | 0        | 0        |
| 0        | 0        | 0        | 0        | 0        | 0        | 0        | 0        | 0        | 0        | 0        | 0        | 0        | 0        | 0        |
| 0        | 0        | 0        | 0        | 0        | 0        | 0        | 0        | 0        | 0        | 0        | 0        | 0        | 0        | 0        |

| CP57     | CP33     | CP61     | CP36     | CP09     | CP11     | CP62     | CP27     | CP68     | CP67     | CP22     | CP30     | CP16     | CP10     | CP17     |
|----------|----------|----------|----------|----------|----------|----------|----------|----------|----------|----------|----------|----------|----------|----------|
| 0.242937 | 0.24198  | 0.233412 | 0.227626 | 0.204191 | 0.203303 | 0.200714 | 0.18468  | 0.17734  | 0.174117 | 0.171243 | 0.157015 | 0.14425  | 0.127379 | 0.114789 |
| 0.184107 | 0.229534 | 0.222223 | 0.396594 | 0.206346 | 0.351965 | 0.256196 | 0.225649 | 0.437284 | 0.491493 | 0.413994 | 0.504561 | 0.30916  | 0.060942 | 0.093761 |
| 0.458437 | 0.029627 | 0.288963 | 0.00542  | 0.125914 | 0.127944 | 0.230632 | 0.262191 | 0.007488 | 0.179873 | 0.085011 | 0.165792 | 0.182283 | 0.68449  | 0.024771 |
| 0.068862 | 0.480239 | 0.033474 | 0.264682 | 0.176431 | 0.26605  | 0.109996 | 0.149928 | 0.360934 | 0.09679  | 0.203317 | 0.075851 | 0.071991 | 0.010049 | 0.071449 |
| 0.02427  | 0.007348 | 0.202206 | 0.096016 | 0.279603 | 0.033217 | 0.140374 | 0.145764 | 0.001615 | 0.048534 | 0.082359 | 0.039677 | 0.266829 | 0.093269 | 0.682347 |
| 0.019487 | 0.010763 | 0.005195 | 0.007661 | 0.00532  | 0.015643 | 0.004174 | 0.027051 | 0.001746 | 3.30E-05 | 0.026235 | 5.48E-04 | 0.012446 | 0.023871 | 0.010051 |
| 0.00127  | 5.09E-04 | 0.009371 | 0.001546 | 0.00216  | 0.001878 | 0.056142 | 0.004737 | 0.012472 | 1.08E-04 | 0.007118 | 0.056539 | 0.013041 | 0        | 0.002488 |
| 6.30E-04 | 0        | 0.003034 | 0        | 0        | 0        | 0.001525 | 0        | 2.30E-05 | 0        | 0.010577 | 0        | 0        | 0        | 2.78E-04 |
| 0        | 0        | 0        | 6.80E-05 | 0        | 0        | 0        | 0        | 2.50E-05 | 0.008835 | 0        | 0        | 0        | 0        | 0        |
| 0        | 0        | 0.001773 | 2.86E-04 | 3.50E-05 | 0        | 0        | 0        | 6.50E-05 | 7.90E-05 | 7.80E-05 | 0        | 0        | 0        | 0        |
| 0        | 0        | 6.70E-05 | 0        | 0        | 0        | 1.97E-04 | 0        | 0        | 1.30E-05 | 6.80E-05 | 1.70E-05 | 0        | 0        | 6.60E-05 |
| 0        | 0        | 2.23E-04 | 1.01E-04 | 0        | 0        | 0        | 0        | 7.98E-04 | 1.25E-04 | 0        | 0        | 0        | 0        | 0        |
| 0        | 0        | 3.20E-05 | 0        | 0        | 0        | 5.00E-05 | 0        | 0        | 0        | 0        | 0        | 0        | 0        | 0        |
| 0        | 0        | 0        | 0        | 0        | 0        | 0        | 0        | 2.10E-04 | 0        | 0        | 0        | 0        | 0        | 0        |
| 0        | 0        | 0        | 0        | 0        | 0        | 0        | 0        | 0        | 0        | 0        | 0        | 0        | 0        | 0        |
| 0        | 0        | 0        | 0        | 0        | 0        | 0        | 0        | 0        | 0        | 0        | 0        | 0        | 0        | 0        |
| 0        | 0        | 2.70E-05 | 0        | 0        | 0        | 0        | 0        | 0        | 0        | 0        | 0        | 0        | 0        | 0        |
| 0        | 0        | 0        | 0        | 0        | 0        | 0        | 0        | 0        | 0        | 0        | 0        | 0        | 0        | 0        |
| 0        | 0        | 0        | 0        | 0        | 0        | 0        | 0        | 0        | 0        | 0        | 0        | 0        | 0        | 0        |

| CP26     | CP51     | CP52     | CP48     | CP38     | CP42     | CP37     | CP24     | CP56     | CP44     | CP39     | CP63     | CP12     | CP59     | CP47     |
|----------|----------|----------|----------|----------|----------|----------|----------|----------|----------|----------|----------|----------|----------|----------|
| 0.106744 | 0.106717 | 0.101943 | 0.09953  | 0.099044 | 0.085633 | 0.084446 | 0.084216 | 0.080375 | 0.079991 | 0.07386  | 0.069112 | 0.068868 | 0.063605 | 0.058291 |
| 0.562381 | 0.194974 | 0.314798 | 0.127238 | 0.268842 | 0.413483 | 0.692673 | 0.485968 | 0.084625 | 0.170853 | 0.33961  | 0.157441 | 0.06261  | 0.07753  | 0.138672 |
| 0.217494 | 0.420443 | 0.00732  | 0.143707 | 0.003504 | 0.215309 | 0.035682 | 0.030237 | 0.690211 | 0.441171 | 0.002798 | 0.274507 | 0.774699 | 0.744234 | 0.037396 |
| 0.090188 | 0.05026  | 0.029705 | 0.087859 | 0.608612 | 0.212454 | 0.173301 | 0.358123 | 0.014036 | 0.057451 | 0.32368  | 0.067853 | 0.014623 | 0.063441 | 0.004693 |
| 0.008634 | 0.219562 | 0.518899 | 0.532094 | 7.60E-05 | 0.041455 | 0.002157 | 0.013947 | 0.105914 | 0.228036 | 0.237117 | 0.426948 | 0.060512 | 0.045636 | 0.755296 |
| 0.006836 | 1.10E-05 | 4.53E-04 | 0.008626 | 0.019922 | 0.029343 | 0.008526 | 0.012037 | 0.023731 | 0.022231 | 0.020399 | 0.002425 | 0.017078 | 0.003262 | 0.004904 |
| 0.007723 | 0.006757 | 0.026843 | 7.94E-04 | 0        | 0.002323 | 0        | 0.01536  | 8.57E-04 | 1.36E-04 | 0.002536 | 0.001714 | 0.001242 | 0.002228 | 7.09E-04 |
| 0        | 0        | 0        | 0        | 0        | 0        | 0        | 2.80E-05 | 2.51E-04 | 0        | 0        | 0        | 3.09E-04 | 6.40E-05 | 0        |
| 0        | 7.95E-04 | 3.90E-05 | 0        | 0        | 0        | 0.003215 | 0        | 0        | 0        | 0        | 0        | 0        | 0        | 3.90E-05 |
| 0        | 2.65E-04 | 0        | 1.52E-04 | 0        | 0        | 0        | 0        | 0        | 0        | 0        | 0        | 0        | 0        | 0        |
| 0        | 1.52E-04 | 0        | 0        | 0        | 0        | 0        | 3.10E-05 | 0        | 1.31E-04 | 0        | 0        | 5.90E-05 | 0        | 0        |
| 0        | 6.40E-05 | 0        | 0        | 0        | 0        | 0        | 5.30E-05 | 0        | 0        | 0        | 0        | 0        | 0        | 0        |
| 0        | 0        | 0        | 0        | 0        | 0        | 0        | 0        | 0        | 0        | 0        | 0        | 0        | 0        | 0        |
| 0        | 0        | 0        | 0        | 0        | 0        | 0        | 0        | 0        | 0        | 0        | 0        | 0        | 0        | 0        |
| 0        | 0        | 0        | 0        | 0        | 0        | 0        | 0        | 0        | 0        | 0        | 0        | 0        | 0        | 0        |
| 0        | 0        | 0        | 0        | 0        | 0        | 0        | 0        | 0        | 0        | 0        | 0        | 0        | 0        | 0        |
| 0        | 0        | 0        | 0        | 0        | 0        | 0        | 0        | 0        | 0        | 0        | 0        | 0        | 0        | 0        |
| 0        | 0        | 0        | 0        | 0        | 0        | 0        | 0        | 0        | 0        | 0        | 0        | 0        | 0        | 0        |
| 0        | 0        | 0        | 0        | 0        | 0        | 0        | 0        | 0        | 0        | 0        | 0        | 0        | 0        | 0        |
| 0        | 0        | 0        | 0        | 0        | 0        | 0        | 0        | 0        | 0        | 0        | 0        | 0        | 0        | 0        |

| CP72     | CP18     | CP19     | CP06     | CP13     | CP21     | CP46     | CP01     | CP54     | CP07     | CP58     | CP65     | CP08     | CP23     | CPR01    |
|----------|----------|----------|----------|----------|----------|----------|----------|----------|----------|----------|----------|----------|----------|----------|
| 0.056088 | 0.053052 | 0.050497 | 0.04419  | 0.039257 | 0.036828 | 0.033417 | 0.025417 | 0.021339 | 0.020843 | 0.015646 | 0.007477 | 0.003929 | 0.002088 | 0.881424 |
| 0.754013 | 0.528566 | 0.082439 | 0.465193 | 0.409991 | 0.029874 | 0.137091 | 0.17874  | 0.057529 | 0.503202 | 0.033042 | 0.014495 | 0.105233 | 0.989183 | 0.089844 |
| 0.006772 | 0.061063 | 0.78448  | 0.211829 | 0.004366 | 0.844666 | 0.076022 | 0.001857 | 0.832359 | 0.006237 | 0.886119 | 0.946485 | 0.059287 | 6.95E-04 | 0.004295 |
| 0.123273 | 0.31794  | 0.011708 | 0.11531  | 0.504732 | 0.01794  | 0.114593 | 0.773902 | 0.019267 | 0.086995 | 0.005563 | 0.003865 | 0.537463 | 7.02E-04 | 0.010115 |
| 0.035953 | 0.014687 | 0.047535 | 0.155738 | 0.013866 | 0.05777  | 0.63232  | 0.008358 | 0.030629 | 0.356825 | 0.039632 | 0.025049 | 0.291119 | 0.007162 | 0.013669 |
| 0.004032 | 0.017955 | 0.02256  | 0.006282 | 0.026285 | 0.011855 | 0.005695 | 0.011658 | 0.035367 | 0.025898 | 0.019785 | 0.002513 | 0.002489 | 7.50E-05 | 5.53E-04 |
| 0.01977  | 0.005509 | 6.06E-04 | 3.91E-04 | 0.001444 | 5.67E-04 | 8.07E-04 | 3.60E-05 | 0.003214 | 0        | 2.13E-04 | 1.16E-04 | 8.20E-05 | 6.40E-05 | 7.90E-05 |
| 0        | 4.58E-04 | 1.75E-04 | 1.22E-04 | 0        | 4.43E-04 | 0        | 0        | 1.42E-04 | 0        | 0        | 0        | 0        | 3.10E-05 | 0        |
| 0        | 5.50E-05 | 0        | 9.45E-04 | 0        | 0        | 2.80E-05 | 3.20E-05 | 0        | 0        | 0        | 0        | 2.42E-04 | 0        | 0        |
| 7.40E-05 | 4.95E-04 | 0        | 0        | 0        | 5.70E-05 | 0        | 0        | 1.54E-04 | 0        | 0        | 0        | 0        | 0        | 0        |
| 2.50E-05 | 0        | 0        | 0        | 0        | 0        | 0        | 0        | 0        | 0        | 0        | 0        | 0        | 0        | 2.10E-05 |
| 0        | 2.20E-04 | 0        | 0        | 5.90E-05 | 0        | 0        | 0        | 0        | 0        | 0        | 0        | 0        | 0        | 0        |
| 0        | 0        | 0        | 0        | 0        | 0        | 0        | 0        | 0        | 0        | 0        | 0        | 0        | 0        | 0        |
| 0        | 0        | 0        | 0        | 0        | 0        | 0        | 0        | 0        | 0        | 0        | 0        | 0        | 0        | 0        |
| 0        | 0        | 0        | 0        | 0        | 0        | 2.70E-05 | 0        | 0        | 0        | 0        | 0        | 0        | 0        | 0        |
| 0        | 0        | 0        | 0        | 0        | 0        | 0        | 0        | 0        | 0        | 0        | 0        | 1.56E-04 | 0        | 0        |
| 0        | 0        | 0        | 0        | 0        | 0        | 0        | 0        | 0        | 0        | 0        | 0        | 0        | 0        | 0        |
| 0        | 0        | 0        | 0        | 0        | 0        | 0        | 0        | 0        | 0        | 0        | 0        | 0        | 0        | 0        |
| 0        | 0        | 0        | 0        | 0        | 0        | 0        | 0        | 0        | 0        | 0        | 0        | 0        | 0        | 0        |

| CPR05    | CPR07    | CPR21    | CPR17    | CPR03    | CPR13    | CPR19    | CPR02    | CPR14    | CPR06    | CPR08    | CPR10    | CPR20    | CPR16    | CPR12    |
|----------|----------|----------|----------|----------|----------|----------|----------|----------|----------|----------|----------|----------|----------|----------|
| 0.41213  | 0.387731 | 0.301645 | 0.25175  | 0.248899 | 0.246372 | 0.241867 | 0.230919 | 0.211671 | 0.201208 | 0.194548 | 0.193588 | 0.169297 | 0.141662 | 0.127717 |
| 0.305908 | 0.236536 | 0.27846  | 0.364864 | 0.140264 | 0.17643  | 0.159595 | 0.208691 | 0.24352  | 0.337853 | 0.303534 | 0.255909 | 0.146745 | 0.20037  | 0.369256 |
| 0.092178 | 0.125625 | 0.280934 | 0.052723 | 0.286903 | 0.056369 | 0.347747 | 0.175213 | 0.13679  | 0.129903 | 0.343547 | 0.287488 | 0.485914 | 0.19158  | 0.096632 |
| 0.013021 | 0.026621 | 0.003581 | 0.027703 | 1.96E-04 | 0.041874 | 0.001227 | 0.03018  | 0.033666 | 0.095682 | 0.029413 | 0.039476 | 0.008273 | 0.021247 | 0.120909 |
| 0.156751 | 0.220246 | 0.133593 | 0.291631 | 0.318828 | 0.472008 | 0.239891 | 0.33037  | 0.336375 | 0.22259  | 0.124809 | 0.203032 | 0.185742 | 0.433109 | 0.271974 |
| 0.004402 | 0.003241 | 0.001752 | 0.002195 | 0.00157  | 0.005298 | 0.002422 | 0.002369 | 0.005186 | 0.004439 | 0.001949 | 0.006783 | 0.002813 | 0.001409 | 0.009068 |
| 0.015395 | 0        | 0        | 0.008216 | 0.00334  | 7.20E-05 | 2.72E-04 | 0.022229 | 0.032689 | 0.00828  | 8.00E-05 | 0.013675 | 2.90E-05 | 0.010298 | 0.004444 |
| 0        | 0        | 0        | 9.18E-04 | 0        | 0.001577 | 0.006979 | 0        | 0        | 0        | 0.001949 | 0        | 0.001187 | 2.72E-04 | 0        |
| 0        | 0        | 0        | 0        | 0        | 0        | 0        | 2.90E-05 | 0        | 0        | 0        | 0        | 0        | 0        | 0        |
| 2.15E-04 | 0        | 3.50E-05 | 0        | 0        | 0        | 0        | 0        | 7.00E-05 | 4.50E-05 | 1.33E-04 | 4.90E-05 | 0        | 5.30E-05 | 0        |
| 0        | 0        | 0        | 0        | 0        | 0        | 0        | 0        | 3.30E-05 | 0        | 3.80E-05 | 0        | 0        | 0        | 0        |
| 0        | 0        | 0        | 0        | 0        | 0        | 0        | 0        | 0        | 0        | 0        | 0        | 0        | 0        | 0        |
| 0        | 0        | 0        | 0        | 0        | 0        | 0        | 0        | 0        | 0        | 0        | 0        | 0        | 0        | 0        |
| 0        | 0        | 0        | 0        | 0        | 0        | 0        | 0        | 0        | 0        | 0        | 0        | 0        | 0        | 0        |
| 0        | 0        | 0        | 0        | 0        | 0        | 0        | 0        | 0        | 0        | 0        | 0        | 0        | 0        | 0        |
| 0        | 0        | 0        | 0        | 0        | 0        | 0        | 0        | 0        | 0        | 0        | 0        | 0        | 0        | 0        |
| 0        | 0        | 0        | 0        | 0        | 0        | 0        | 0        | 0        | 0        | 0        | 0        | 0        | 0        | 0        |
| 0        | 0        | 0        | 0        | 0        | 0        | 0        | 0        | 0        | 0        | 0        | 0        | 0        | 0        | 0        |
| 0        | 0        | 0        | 0        | 0        | 0        | 0        | 0        | 0        | 0        | 0        | 0        | 0        | 0        | 0        |
| 0        | 0        | 0        | 0        | 0        | 0        | 0        | 0        | 0        | 0        | 0        | 0        | 0        | 0        | 0        |

| CPR18    | CPR04    | CPR15    | CPR11    | CPR22    | CPR09    | HC119    | HC121    | HC128    | HC061    | HC020    | HC056    | HC064    | HC146    | HC041    |          |
|----------|----------|----------|----------|----------|----------|----------|----------|----------|----------|----------|----------|----------|----------|----------|----------|
| 0.101268 | 0.091865 | 0.091237 | 0.083028 | 0.05954  | 0.029787 | 0.757387 | 0.735774 | 0.666253 | 0.646821 | 0.619759 | 0.617469 | 0.615198 | 0.599068 | 0.554645 |          |
| 0.213434 | 0.379014 | 0.352496 | 0.114051 | 0.144346 | 0.168288 | 0.161443 | 0.167973 | 0.193298 | 0.174265 | 0.277595 | 0.224589 | 0.167539 | 0.113434 | 0.235909 |          |
| 0.378427 | 0.160322 | 0.287074 | 0.555046 | 0.655439 | 0.671054 | 0.007075 | 0.019454 | 0.058342 | 0.007855 | 0.034312 | 0.04332  | 0.056131 | 0.130659 | 0.101826 |          |
| 7.64E-04 | 0.037516 | 0.007743 | 0.060459 | 0.019875 | 0.066111 | 0.047844 | 0.043663 | 0.058496 | 0.14658  | 0.043146 | 0.046382 | 0.14241  | 0.03677  | 0.062832 |          |
| 0.300317 | 0.31545  | 0.23046  | 0.181456 | 0.116857 | 0.060245 | 0.013698 | 0.018121 | 0.001113 | 0.013618 | 0.011466 | 0.048708 | 0.001042 | 0.111516 | 0.026276 |          |
| 0.002539 | 0.005257 | 0.002208 | 0.004343 | 0.002807 | 0.004515 | 0.003508 | 0.006007 | 0.018562 | 0.008339 | 0.006969 | 0.00893  | 0.012523 | 0.002111 | 0.01788  |          |
| 0.003176 | 0.010361 | 0.028471 | 0.001544 | 0.001027 |          | 0        | 0.008878 | 0.008997 | 0.00324  | 0.002522 | 0.006753 | 0.007217 | 0.005089 | 0.006245 | 6.32E-04 |
| 0        | 1.31E-04 | 9.40E-05 | 7.30E-05 | 0        | 0        | 9.30E-05 | 1.10E-05 | 6.08E-04 | 0        | 0        | 0.003316 | 6.80E-05 | 1.38E-04 | 0        |          |
| 3.00E-05 | 0        | 0        | 0        | 0        | 0        | 0        | 0        | 0        | 0        | 0        | 0        | 0        | 0        | 0        |          |
| 4.50E-05 | 3.60E-05 | 1.48E-04 | 0        | 7.20E-05 | 0        | 0        | 0        | 0        | 0        | 0        | 0        | 0        | 0        | 0        |          |
| 0        | 0        | 3.40E-05 | 0        | 3.70E-05 | 0        | 0        | 0        | 4.70E-05 | 0        | 0        | 0        | 0        | 0        | 0        |          |
| 0        | 4.80E-05 | 3.50E-05 | 0        | 0        | 0        | 5.30E-05 | 0        | 4.10E-05 | 0        | 0        | 4.70E-05 | 0        | 5.90E-05 | 0        |          |
| 0        | 0        | 0        | 0        | 0        | 0        | 2.10E-05 | 0        | 0        | 0        | 0        | 2.20E-05 | 0        | 0        | 0        |          |
| 0        | 0        | 0        | 0        | 0        | 0        | 0        | 0        | 0        | 0        | 0        | 0        | 0        | 0        | 0        |          |
| 0        | 0        | 0        | 0        | 0        | 0        | 0        | 0        | 0        | 0        | 0        | 0        | 0        | 0        | 0        |          |
| 0        | 0        | 0        | 0        | 0        | 0        | 0        | 0        | 0        | 0        | 0        | 0        | 0        | 0        | 0        |          |
| 0        | 0        | 0        | 0        | 0        | 0        | 0        | 0        | 0        | 0        | 0        | 0        | 0        | 0        | 0        |          |
| 0        | 0        | 0        | 0        | 0        | 0        | 0        | 0        | 0        | 0        | 0        | 0        | 0        | 0        | 0        |          |
| 0        | 0        | 0        | 0        | 0        | 0        | 0        | 0        | 0        | 0        | 0        | 0        | 0        | 0        | 0        |          |
| 0        | 0        | 0        | 0        | 0        | 0        | 0        | 0        | 0        | 0        | 0        | 0        | 0        | 0        | 0        |          |

| HC050    | HC043    | HC080    | HC147    | HC036    | HC013    | HC091    | HC118    | HC086    | HC040    | HC137    | HC138    | HC069    | HC046    | HC115    |
|----------|----------|----------|----------|----------|----------|----------|----------|----------|----------|----------|----------|----------|----------|----------|
| 0.546794 | 0.532562 | 0.52304  | 0.521851 | 0.521534 | 0.521178 | 0.5105   | 0.506213 | 0.497596 | 0.497249 | 0.493032 | 0.490596 | 0.485159 | 0.477246 | 0.473334 |
| 0.185685 | 0.231841 | 0.216169 | 0.180871 | 0.323921 | 0.306235 | 0.250474 | 0.155322 | 0.215834 | 0.101645 | 0.179618 | 0.136535 | 0.306789 | 0.326355 | 0.177186 |
| 0.049736 | 0.034841 | 0.100137 | 0.070467 | 0.003599 | 0.024242 | 0.150719 | 0.133015 | 0.136077 | 0.092667 | 0.041232 | 0.140995 | 0.031062 | 0.015585 | 0.10861  |
| 0.136128 | 0.137671 | 0.043162 | 0.02877  | 0.124077 | 0.087145 | 0.05631  | 0.052935 | 0.080772 | 0.021086 | 0.0526   | 0.036573 | 0.06994  | 0.097313 | 0.028358 |
| 0.071303 | 0.029003 | 0.097837 | 0.177015 | 0.001675 | 0.053975 | 0.015305 | 0.126551 | 0.038026 | 0.247863 | 0.207976 | 0.154609 | 0.093542 | 0.050167 | 0.16263  |
| 0.007694 | 0.006504 | 0.006436 | 0.012256 | 0.004687 | 0.002779 | 0.013319 | 0.018079 | 0.02383  | 0.005392 | 0.003593 | 0.012787 | 0.004298 | 0.011088 | 0.004765 |
| 0.002161 | 0.027553 | 0.008675 | 0.00734  | 0.020476 | 0.004446 | 0.003296 | 0.006961 | 0.00586  | 0.010393 | 0.017763 | 0.015333 | 0.009182 | 0.022118 | 0.045037 |
| 4.14E-04 | 0        | 0.004489 | 0.001405 | 0        | 0        | 0        | 9.24E-04 | 0.001868 | 0.023687 | 0.003724 | 0.011992 | 0        | 6.40E-05 | 8.00E-05 |
| 0        | 0        | 0        | 0        | 3.10E-05 | 0        | 7.70E-05 | 0        | 1.37E-04 | 0        | 0        | 0        | 0        | 0        | 0        |
| 0        | 0        | 0        | 0        | 0        | 0        | 0        | 0        | 0        | 0        | 3.30E-05 | 7.40E-05 | 0        | 0        | 0        |
| 8.50E-05 | 0        | 5.50E-05 | 2.50E-05 | 0        | 0        | 0        | 0        | 0        | 0        | 4.29E-04 | 5.06E-04 | 0        | 3.80E-05 | 0        |
| 0        | 0        | 0        | 0        | 0        | 0        | 0        | 0        | 0        | 0        | 0        | 0        | 0        | 0        | 0        |
| 0        | 0        | 0        | 0        | 0        | 0        | 0        | 0        | 0        | 1.80E-05 | 0        | 0        | 2.80E-05 | 0        | 0        |
| 0        | 0        | 0        | 0        | 0        | 0        | 0        | 0        | 0        | 0        | 0        | 0        | 0        | 0        | 0        |
| 0        | 2.50E-05 | 0        | 0        | 0        | 0        | 0        | 0        | 0        | 0        | 0        | 0        | 0        | 2.60E-05 | 0        |
| 0        | 0        | 0        | 0        | 0        | 0        | 0        | 0        | 0        | 0        | 0        | 0        | 0        | 0        | 0        |
| 0        | 0        | 0        | 0        | 0        | 0        | 0        | 0        | 0        | 0        | 0        | 0        | 0        | 0        | 0        |
| 0        | 0        | 0        | 0        | 0        | 0        | 0        | 0        | 0        | 0        | 0        | 0        | 0        | 0        | 0        |
| 0        | 0        | 0        | 0        | 0        | 0        | 0        | 0        | 0        | 0        | 0        | 0        | 0        | 0        | 0        |

| HC033    | HC057    | HC003    | HC099    | HC074    | HC122    | HC114    | HC039    | HC120    | HC011    | HC005    | HC083    | HC001    | HC092    | HC047    |
|----------|----------|----------|----------|----------|----------|----------|----------|----------|----------|----------|----------|----------|----------|----------|
| 0.471284 | 0.470466 | 0.46136  | 0.457632 | 0.455978 | 0.453289 | 0.437128 | 0.436451 | 0.431105 | 0.427245 | 0.426254 | 0.426056 | 0.406366 | 0.404738 | 0.400201 |
| 0.304719 | 0.073308 | 0.202839 | 0.31736  | 0.166884 | 0.28844  | 0.094103 | 0.238779 | 0.159569 | 0.229191 | 0.241795 | 0.317539 | 0.127631 | 0.214491 | 0.349993 |
| 0.047271 | 0.15929  | 0.021886 | 0.087237 | 0.219751 | 0.057349 | 0.15659  | 0.010477 | 0.200952 | 0.163909 | 0.066871 | 0.067737 | 0.317626 | 0.043381 | 0.04491  |
| 0.048367 | 0.008912 | 0.269241 | 0.098293 | 0.086749 | 0.097914 | 0.017523 | 0.031675 | 0.04385  | 0.047067 | 0.210761 | 0.137595 | 0.065281 | 0.263613 | 0.109683 |
| 0.061527 | 0.263163 | 0.018245 | 0.012087 | 0.033772 | 0.083097 | 0.277103 | 0.251556 | 0.1426   | 0.103399 | 0.022122 | 0.016536 | 0.041745 | 0.027156 | 0.070853 |
| 0.003502 | 0.010156 | 0.013377 | 0.026484 | 0.016074 | 0.009505 | 0.008624 | 0.004542 | 0.018881 | 0.004295 | 0.010892 | 0.028876 | 0.01311  | 0.005165 | 0.017337 |
| 0.001015 | 0.004116 | 0.0121   | 9.07E-04 | 0.004472 | 0.008088 | 0.004566 | 0.025775 | 0.00115  | 0.012509 | 0.020442 | 0.003499 | 0.010975 | 0.032515 | 0.006005 |
| 0.06221  | 0.010565 | 9.10E-04 | 0        | 0.016238 | 0.002299 | 0.003682 | 5.69E-04 | 0.001852 | 0.012304 | 8.63E-04 | 0.002107 | 0.017045 | 0.008592 | 9.79E-04 |
| 0        | 0        | 0        | 0        | 0        | 0        | 0        | 2.90E-05 | 0        | 0        | 0        | 0        | 0        | 0        | 0        |
| 3.70E-05 | 0        | 0        | 0        | 0        | 0        | 1.31E-04 | 1.12E-04 | 0        | 2.70E-05 | 0        | 0        | 0        | 0        | 0        |
| 2.60E-05 | 2.40E-05 | 4.20E-05 | 0        | 4.70E-05 | 0        | 5.50E-04 | 0        | 0        | 5.40E-05 | 0        | 5.50E-05 | 3.20E-05 | 1.48E-04 | 3.90E-05 |
| 0        | 0        | 0        | 0        | 0        | 0        | 0        | 3.50E-05 | 4.10E-05 | 0        | 0        | 0        | 0        | 4.20E-05 | 0        |
| 4.20E-05 | 0        | 0        | 0        | 3.50E-05 | 1.90E-05 | 0        | 0        | 0        | 0        | 0        | 0        | 1.89E-04 | 1.59E-04 | 0        |
| 0        | 0        | 0        | 0        | 0        | 0        | 0        | 0        | 0        | 0        | 0        | 0        | 0        | 0        | 0        |
| 0        | 0        | 0        | 0        | 0        | 0        | 0        | 0        | 0        | 0        | 0        | 0        | 0        | 0        | 0        |
| 0        | 0        | 0        | 0        | 0        | 0        | 0        | 0        | 0        | 0        | 0        | 0        | 0        | 0        | 0        |
| 0        | 0        | 0        | 0        | 0        | 0        | 0        | 0        | 0        | 0        | 0        | 0        | 0        | 0        | 0        |
| 0        | 0        | 0        | 0        | 0        | 0        | 0        | 0        | 0        | 0        | 0        | 0        | 0        | 0        | 0        |
| 0        | 0        | 0        | 0        | 0        | 0        | 0        | 0        | 0        | 0        | 0        | 0        | 0        | 0        | 0        |
| 0        | 0        | 0        | 0        | 0        | 0        | 0        | 0        | 0        | 0        | 0        | 0        | 0        | 0        | 0        |

|          |          |          |          |          |          |          |          |          |          |          |          |          |          |          |
|----------|----------|----------|----------|----------|----------|----------|----------|----------|----------|----------|----------|----------|----------|----------|
| HC051    | HC090    | HC030    | HC132    | HC072    | HC052    | HC140    | HC098    | HC066    | HC031    | HC126    | HC067    | HC124    | HC015    | HC141    |
| 0.398042 | 0.397116 | 0.39684  | 0.39659  | 0.395457 | 0.386062 | 0.382025 | 0.373538 | 0.371344 | 0.370979 | 0.370583 | 0.368089 | 0.364429 | 0.362769 | 0.362609 |
| 0.208449 | 0.065047 | 0.160142 | 0.459122 | 0.303246 | 0.306352 | 0.164236 | 0.152082 | 0.253615 | 0.169527 | 0.146742 | 0.242975 | 0.438864 | 0.181392 | 0.073554 |
| 0.30481  | 0.302274 | 0.339013 | 0.002939 | 0.164617 | 0.100473 | 0.070921 | 0.049893 | 0.138487 | 0.322264 | 0.307429 | 0.014648 | 0.001666 | 0.279144 | 0.422258 |
| 0.034411 | 0.059516 | 0.047458 | 0.125711 | 0.061658 | 0.149967 | 0.148015 | 0.009749 | 0.072044 | 0.031141 | 0.106895 | 0.099098 | 0.173988 | 0.059193 | 0.082336 |
| 0.03139  | 0.140045 | 0.041683 | 7.83E-04 | 0.043594 | 0.044015 | 0.212537 | 0.389504 | 0.15135  | 0.081241 | 0.038951 | 0.246805 | 0.004212 | 0.099941 | 0.038819 |
| 0.017629 | 0.010462 | 0.008917 | 0.012357 | 0.005774 | 0.006808 | 0.012816 | 0.016847 | 0.005562 | 0.007233 | 0.02165  | 0.005097 | 0.015875 | 0.009062 | 0.019799 |
| 0.002655 | 0.016515 | 0.005505 | 0.002498 | 0.009174 | 0.004809 | 0.007977 | 0.004996 | 0.006828 | 0.014924 | 5.53E-04 | 0.02324  | 9.45E-04 | 0.008141 | 3.39E-04 |
| 0.002586 | 0.009025 | 4.42E-04 | 0        | 0.011504 | 0.001323 | 0.001028 | 0.003287 | 3.37E-04 | 0.002425 | 0.007197 | 4.80E-05 | 2.10E-05 | 2.48E-04 | 2.86E-04 |
| 0        | 0        | 0        | 0        | 0        | 1.22E-04 | 0        | 0        | 0        | 0        | 0        | 0        | 0        | 0        | 0        |
| 2.80E-05 | 0        | 0        | 0        | 0.004052 | 0        | 0        | 0        | 2.90E-05 | 0        | 0        | 0        | 0        | 0        | 0        |
| 0        | 0        | 0        | 0        | 7.80E-04 | 0        | 0        | 6.80E-05 | 4.04E-04 | 1.83E-04 | 0        | 0        | 0        | 1.10E-04 | 0        |
| 0        | 0        | 0        | 0        | 1.24E-04 | 1.60E-05 | 3.30E-05 | 0        | 0        | 0        | 0        | 0        | 0        | 0        | 0        |
| 0        | 0        | 0        | 0        | 0        | 5.30E-05 | 4.12E-04 | 3.60E-05 | 0        | 8.30E-05 | 0        | 0        | 0        | 0        | 0        |
| 0        | 0        | 0        | 0        | 0        | 0        | 0        | 0        | 0        | 0        | 0        | 0        | 0        | 0        | 0        |
| 0        | 0        | 0        | 0        | 0        | 0        | 0        | 0        | 0        | 0        | 0        | 0        | 0        | 0        | 0        |
| 0        | 0        | 0        | 0        | 0        | 0        | 0        | 0        | 0        | 0        | 0        | 0        | 0        | 0        | 0        |
| 0        | 0        | 0        | 0        | 0        | 0        | 0        | 0        | 0        | 0        | 0        | 0        | 0        | 0        | 0        |
| 0        | 0        | 0        | 0        | 2.00E-05 | 0        | 0        | 0        | 0        | 0        | 0        | 0        | 0        | 0        | 0        |
| 0        | 0        | 0        | 0        | 0        | 0        | 0        | 0        | 0        | 0        | 0        | 0        | 0        | 0        | 0        |
| 0        | 0        | 0        | 0        | 0        | 0        | 0        | 0        | 0        | 0        | 0        | 0        | 0        | 0        | 0        |

|          |          |          |          |          |          |          |          |          |          |          |          |          |          |          |
|----------|----------|----------|----------|----------|----------|----------|----------|----------|----------|----------|----------|----------|----------|----------|
| HC055    | HC106    | HC045    | HC009    | HC017    | HC053    | HC139    | HC136    | HC111    | HC144    | HC123    | HC073    | HC097    | HC142    | HC094    |
| 0.356974 | 0.355792 | 0.351635 | 0.350372 | 0.348358 | 0.345748 | 0.338657 | 0.336271 | 0.335863 | 0.331848 | 0.330745 | 0.330716 | 0.325276 | 0.316024 | 0.311243 |
| 0.285607 | 0.321645 | 0.207002 | 0.14991  | 0.200941 | 0.298254 | 0.13633  | 0.124799 | 0.232077 | 0.226656 | 0.339893 | 0.273439 | 0.336846 | 0.165166 | 0.326793 |
| 0.195918 | 0.146287 | 0.270316 | 0.347952 | 0.173011 | 0.038256 | 0.262609 | 0.2894   | 0.172058 | 0.047742 | 0.211665 | 0.107213 | 0.236542 | 0.314518 | 0.042032 |
| 0.027685 | 0.107714 | 0.083933 | 0.041689 | 0.0423   | 0.226518 | 0.012932 | 0.015268 | 0.065734 | 0.310477 | 0.035747 | 0.14234  | 0.061298 | 0.024383 | 0.264454 |
| 0.117541 | 0.032502 | 0.070666 | 0.101666 | 0.204828 | 0.061053 | 0.230421 | 0.219575 | 0.147352 | 0.060244 | 0.066018 | 0.119412 | 0.018286 | 0.127848 | 0.014216 |
| 0.010415 | 0.027733 | 0.008963 | 9.55E-04 | 0.009454 | 0.009091 | 0.009584 | 0.006559 | 0.011582 | 0.011688 | 0.015891 | 0.004791 | 0.018328 | 0.009547 | 0.003181 |
| 0.004762 | 0.003955 | 0.006423 | 0.005524 | 0.004702 | 0.020803 | 0.006319 | 0.007224 | 0.019806 | 0.010871 | 1.70E-05 | 0.018177 | 0.003146 | 0.038777 | 0.036655 |
| 9.68E-04 | 0.004305 | 9.78E-04 | 0.001673 | 0.016122 | 2.53E-04 | 0.003013 | 9.04E-04 | 0.015034 | 3.94E-04 | 0        | 0.00354  | 1.87E-04 | 0.003344 | 0.001069 |
| 0        | 0        | 0        | 0        | 0        | 0        | 0        | 0        | 0        | 0        | 0        | 0        | 0        | 0        | 1.40E-04 |
| 4.70E-05 | 0        | 0        | 0        | 2.84E-04 | 0        | 1.07E-04 | 0        | 0        | 0        | 0        | 0        | 2.30E-05 | 3.50E-05 | 4.40E-05 |
| 8.30E-05 | 0        | 8.40E-05 | 1.70E-04 | 0        | 2.40E-05 | 2.80E-05 | 0        | 4.51E-04 | 1.70E-05 | 2.40E-05 | 3.72E-04 | 1.90E-05 | 3.24E-04 | 1.11E-04 |
| 0        | 0        | 0        | 0        | 0        | 0        | 0        | 0        | 0        | 0        | 0        | 0        | 4.90E-05 | 0        | 2.20E-05 |
| 0        | 6.70E-05 | 0        | 0        | 0        | 0        | 0        | 0        | 4.30E-05 | 6.30E-05 | 0        | 0        | 0        | 3.40E-05 | 4.00E-05 |
| 0        | 0        | 0        | 0        | 0        | 0        | 0        | 0        | 0        | 0        | 0        | 0        | 0        | 0        | 0        |
| 0        | 0        | 0        | 8.90E-05 | 0        | 0        | 0        | 0        | 0        | 0        | 0        | 0        | 0        | 0        | 0        |
| 0        | 0        | 0        | 0        | 0        | 0        | 0        | 0        | 0        | 0        | 0        | 0        | 0        | 0        | 0        |
| 0        | 0        | 0        | 0        | 0        | 0        | 0        | 0        | 0        | 0        | 0        | 0        | 0        | 0        | 0        |
| 0        | 0        | 0        | 0        | 0        | 0        | 0        | 0        | 0        | 0        | 0        | 0        | 0        | 0        | 0        |
| 0        | 0        | 0        | 0        | 0        | 0        | 0        | 0        | 0        | 0        | 0        | 0        | 0        | 0        | 0        |
| 0        | 0        | 0        | 0        | 0        | 0        | 0        | 0        | 0        | 0        | 0        | 0        | 0        | 0        | 0        |

| HC117    | HC023    | HC008    | HC107    | HC062    | HC016    | HC150    | HC012    | HC048    | HC105    | HC004    | HC116    | HC071    | HC044    | HC035    |
|----------|----------|----------|----------|----------|----------|----------|----------|----------|----------|----------|----------|----------|----------|----------|
| 0.30847  | 0.307021 | 0.30424  | 0.303002 | 0.30222  | 0.299552 | 0.299542 | 0.299366 | 0.294736 | 0.291576 | 0.290708 | 0.289222 | 0.286241 | 0.283015 | 0.277754 |
| 0.224408 | 0.255747 | 0.386843 | 0.347174 | 0.121004 | 0.195028 | 0.143751 | 0.15367  | 0.543505 | 0.361013 | 0.402488 | 0.106181 | 0.162563 | 0.213954 | 0.261814 |
| 0.038275 | 0.334726 | 0.173733 | 0.00316  | 0.354948 | 0.409247 | 0.343992 | 0.320679 | 0.003554 | 0.084454 | 0.053793 | 0.515447 | 0.401942 | 0.124807 | 0.096302 |
| 0.064392 | 0.036027 | 0.089422 | 0.278158 | 0.146923 | 0.034744 | 0.041705 | 0.098761 | 0.127925 | 0.187666 | 0.173241 | 0.036553 | 0.071751 | 0.234601 | 0.2204   |
| 0.33912  | 0.047112 | 0.040571 | 0.054003 | 0.048049 | 0.039385 | 0.142284 | 0.103468 | 0.003471 | 0.048706 | 0.052592 | 0.039537 | 0.055984 | 0.120965 | 0.105582 |
| 0.004931 | 0.016508 | 0.002908 | 0.010872 | 0.02444  | 0.019641 | 0.021838 | 0.008869 | 0.011194 | 0.021526 | 0.022054 | 0.008777 | 0.014196 | 0.002169 | 0.011217 |
| 0.015918 | 0.001054 | 0.001733 | 0.003136 | 0.001048 | 0.002052 | 0.001761 | 0.007112 | 0.015615 | 0.004704 | 0.002262 | 0.002379 | 0.004982 | 0.020416 | 0.023462 |
| 0.003924 | 0.001767 | 9.20E-05 | 3.90E-05 | 0.001311 | 2.34E-04 | 0.004989 | 0.007963 | 0        | 2.91E-04 | 0.002862 | 0.001847 | 0.00198  | 7.30E-05 | 0.003469 |
| 0        | 0        | 0        | 0        | 0        | 0        | 6.40E-05 | 0        | 0        | 0        | 0        | 0        | 0        | 0        | 0        |
| 0        | 0        | 2.52E-04 | 4.80E-05 | 3.50E-05 | 0        | 2.30E-05 | 0        | 0        | 0        | 0        | 3.40E-05 | 0        | 0        | 0        |
| 5.62E-04 | 3.80E-05 | 0        | 9.10E-05 | 2.20E-05 | 3.40E-05 | 2.50E-05 | 8.60E-05 | 0        | 0        | 0        | 0        | 2.77E-04 | 0        | 0        |
| 0        | 0        | 1.32E-04 | 3.17E-04 | 0        | 8.30E-05 | 0        | 0        | 0        | 0        | 0        | 0        | 2.80E-05 | 0        | 0        |
| 0        | 0        | 0        | 0        | 0        | 0        | 2.60E-05 | 2.60E-05 | 0        | 0        | 0        | 2.30E-05 | 5.60E-05 | 0        | 0        |
| 0        | 0        | 3.70E-05 | 0        | 0        | 0        | 0        | 0        | 0        | 0        | 0        | 0        | 0        | 0        | 0        |
| 0        | 0        | 3.70E-05 | 0        | 0        | 0        | 0        | 0        | 0        | 6.40E-05 | 0        | 0        | 0        | 0        | 0        |
| 0        | 0        | 0        | 0        | 0        | 0        | 0        | 0        | 0        | 0        | 0        | 0        | 0        | 0        | 0        |
| 0        | 0        | 0        | 0        | 0        | 0        | 0        | 0        | 0        | 0        | 0        | 0        | 0        | 0        | 0        |
| 0        | 0        | 0        | 0        | 0        | 0        | 0        | 0        | 0        | 0        | 0        | 0        | 0        | 0        | 0        |
| 0        | 0        | 0        | 0        | 0        | 0        | 0        | 0        | 0        | 0        | 0        | 0        | 0        | 0        | 0        |

|          |          |          |          |          |          |          |          |          |          |          |          |          |          |          |
|----------|----------|----------|----------|----------|----------|----------|----------|----------|----------|----------|----------|----------|----------|----------|
| HC025    | HC102    | HC010    | HC032    | HC112    | HC007    | HC134    | HC049    | HC002    | HC087    | HC081    | HC065    | HC075    | HC096    | HC085    |
| 0.273615 | 0.27236  | 0.272059 | 0.272002 | 0.270926 | 0.266561 | 0.259245 | 0.25739  | 0.255011 | 0.254807 | 0.251999 | 0.250655 | 0.249985 | 0.236065 | 0.2345   |
| 0.519427 | 0.321785 | 0.229394 | 0.286801 | 0.118759 | 0.135704 | 0.284487 | 0.187323 | 0.46371  | 0.194432 | 0.382706 | 0.261805 | 0.281863 | 0.144231 | 0.447963 |
| 0.038263 | 0.249335 | 0.293078 | 0.216586 | 0.407177 | 0.464847 | 0.21603  | 0.35934  | 0.010136 | 0.202238 | 0.117507 | 0.245771 | 0.172755 | 0.48926  | 0.059351 |
| 0.128618 | 0.094196 | 0.09412  | 0.099774 | 0.043521 | 0.042689 | 0.189433 | 0.044612 | 0.238392 | 0.032091 | 0.085538 | 0.192913 | 0.147754 | 0.032921 | 0.211993 |
| 0.025552 | 0.020593 | 0.090245 | 0.111107 | 0.148946 | 0.070422 | 0.035538 | 0.107418 | 0.003816 | 0.29425  | 0.134969 | 0.023711 | 0.115973 | 0.076724 | 0.0299   |
| 0.014216 | 0.033304 | 0.006626 | 0.004816 | 0.008254 | 0.005562 | 0.005115 | 0.028259 | 0.019741 | 0.013434 | 0.009422 | 0.008635 | 0.00552  | 0.014554 | 0.009659 |
| 2.85E-04 | 0.006889 | 0.009879 | 0.008157 | 9.43E-04 | 0.004905 | 0.007711 | 0.007029 | 0.009067 | 0.002342 | 0.017859 | 0.016279 | 0.024448 | 0.001908 | 0.005788 |
| 2.40E-05 | 0.001469 | 0.004562 | 6.99E-04 | 0.001474 | 0.008913 | 0.002072 | 0.008629 | 1.27E-04 | 0.006355 | 0        | 1.50E-04 | 0.001545 | 0.004337 | 8.27E-04 |
| 0        | 0        | 1.80E-05 | 0        | 0        | 0        | 0        | 0        | 0        | 0        | 0        | 0        | 0        | 0        | 0        |
| 0        | 0        | 0        | 0        | 0        | 0        | 9.60E-05 | 0        | 0        | 2.80E-05 | 0        | 0        | 0        | 0        | 0        |
| 0        | 0        | 0        | 3.10E-05 | 0        | 3.48E-04 | 1.57E-04 | 0        | 0        | 2.30E-05 | 0        | 5.60E-05 | 1.27E-04 | 0        | 1.90E-05 |
| 0        | 0        | 0        | 0        | 0        | 0        | 5.20E-05 | 0        | 0        | 0        | 0        | 2.50E-05 | 0        | 0        | 0        |
| 0        | 6.90E-05 | 1.90E-05 | 2.70E-05 | 0        | 4.90E-05 | 3.60E-05 | 0        | 0        | 0        | 0        | 0        | 0        | 0        | 0        |
| 0        | 0        | 0        | 0        | 0        | 0        | 2.80E-05 | 0        | 0        | 0        | 0        | 0        | 0        | 0        | 0        |
| 0        | 0        | 0        | 0        | 0        | 0        | 0        | 0        | 0        | 0        | 0        | 0        | 3.00E-05 | 0        | 0        |
| 0        | 0        | 0        | 0        | 0        | 0        | 0        | 0        | 0        | 0        | 0        | 0        | 0        | 0        | 0        |
| 0        | 0        | 0        | 0        | 0        | 0        | 0        | 0        | 0        | 0        | 0        | 0        | 0        | 0        | 0        |
| 0        | 0        | 0        | 0        | 0        | 0        | 0        | 0        | 0        | 0        | 0        | 0        | 0        | 0        | 0        |
| 0        | 0        | 0        | 0        | 0        | 0        | 0        | 0        | 0        | 0        | 0        | 0        | 0        | 0        | 0        |

| HC145    | HC070    | HC088    | HC019    | HC079    | HC034    | HC060    | HC018    | HC109    | HC038    | HC077    | HC029    | HC089    | HC130    | HC093    |
|----------|----------|----------|----------|----------|----------|----------|----------|----------|----------|----------|----------|----------|----------|----------|
| 0.233182 | 0.228294 | 0.224143 | 0.221414 | 0.221129 | 0.218901 | 0.218789 | 0.212504 | 0.212197 | 0.201527 | 0.199119 | 0.19146  | 0.189577 | 0.18883  | 0.186087 |
| 0.252084 | 0.203249 | 0.222292 | 0.262638 | 0.274504 | 0.208809 | 0.564991 | 0.200191 | 0.145861 | 0.224247 | 0.045956 | 0.366852 | 0.402278 | 0.110137 | 0.247579 |
| 0.027129 | 0.380887 | 0.301984 | 0.007149 | 0.338152 | 0.265516 | 0.038232 | 0.300296 | 0.598691 | 0.314856 | 0.695662 | 0.120402 | 0.20407  | 0.584482 | 0.136744 |
| 0.439232 | 0.108904 | 0.073596 | 0.390735 | 0.01949  | 0.272456 | 0.039236 | 0.113569 | 0.022271 | 0.091433 | 0.029714 | 0.064806 | 0.139041 | 0.077885 | 0.156478 |
| 0.025501 | 0.07203  | 0.144818 | 0.082295 | 0.112652 | 0.028405 | 0.065158 | 0.162363 | 0.005275 | 0.139364 | 0.015983 | 0.232618 | 0.037605 | 0.018535 | 0.259253 |
| 0.017709 | 0.004521 | 0.003638 | 0.001007 | 0.026951 | 0.002571 | 0.009259 | 0.005472 | 0.01406  | 0.026837 | 0.011304 | 0.013858 | 0.008824 | 0.016745 | 0.00306  |
| 0.004635 | 0.00155  | 0.012816 | 0.019894 | 0.001402 | 0.002656 | 0.063917 | 0.004909 | 0.001465 | 0.001678 | 0.001949 | 0.006575 | 0.009792 | 0.002528 | 0.01051  |
| 5.28E-04 | 3.04E-04 | 0.01439  | 0.014743 | 0.00572  | 5.83E-04 | 1.90E-04 | 4.47E-04 | 1.32E-04 | 2.30E-05 | 3.13E-04 | 0.003321 | 0.008151 | 8.13E-04 | 2.57E-04 |
| 0        | 2.70E-05 | 2.60E-05 | 0        | 0        | 0        | 0        | 0        | 0        | 0        | 0        | 0        | 0        | 0        | 0        |
| 0        | 5.00E-05 | 0.001045 | 3.80E-05 | 0        | 4.80E-05 | 2.90E-05 | 1.57E-04 | 0        | 0        | 0        | 0        | 2.90E-05 | 0        | 0        |
| 0        | 1.84E-04 | 4.27E-04 | 0        | 0        | 5.50E-05 | 1.31E-04 | 9.20E-05 | 0        | 0        | 0        | 5.20E-05 | 2.12E-04 | 4.50E-05 | 0        |
| 0        | 0        | 4.90E-05 | 8.70E-05 | 0        | 0        | 6.80E-05 | 0        | 4.80E-05 | 0        | 0        | 0        | 0        | 0        | 3.20E-05 |
| 0        | 0        | 7.76E-04 | 0        | 0        | 0        | 0        | 0        | 0        | 0        | 0        | 5.60E-05 | 3.65E-04 | 0        | 0        |
| 0        | 0        | 0        | 0        | 0        | 0        | 0        | 0        | 0        | 0        | 0        | 0        | 2.80E-05 | 0        | 0        |
| 0        | 0        | 0        | 0        | 0        | 0        | 0        | 0        | 0        | 0        | 0        | 0        | 0        | 0        | 0        |
| 0        | 0        | 0        | 0        | 0        | 0        | 0        | 0        | 0        | 0        | 0        | 0        | 2.80E-05 | 0        | 0        |
| 0        | 0        | 0        | 0        | 0        | 0        | 0        | 0        | 0        | 0        | 0        | 0        | 0        | 0        | 0        |
| 0        | 0        | 0        | 0        | 0        | 0        | 0        | 0        | 0        | 2.40E-05 | 0        | 0        | 0        | 0        | 0        |
| 0        | 0        | 0        | 0        | 0        | 0        | 0        | 0        | 0        | 1.10E-05 | 0        | 0        | 0        | 0        | 0        |

| HC042    | HC100    | HC014    | HC148    | HC133    | HC149    | HC054    | HC022    | HC129    | HC076    | HC104    | HC026    | HC131    | HC095    | HC059    |
|----------|----------|----------|----------|----------|----------|----------|----------|----------|----------|----------|----------|----------|----------|----------|
| 0.182444 | 0.175766 | 0.173316 | 0.17246  | 0.167196 | 0.166572 | 0.161667 | 0.161012 | 0.159163 | 0.158959 | 0.153994 | 0.153801 | 0.153762 | 0.151323 | 0.150559 |
| 0.12379  | 0.139223 | 0.48559  | 0.044672 | 0.146091 | 0.067787 | 0.084928 | 0.220868 | 0.255486 | 0.045633 | 0.429294 | 0.149739 | 0.435747 | 0.449249 | 0.161289 |
| 0.00359  | 0.423118 | 0.062793 | 0.639946 | 0.496915 | 0.705145 | 0.359374 | 0.373356 | 0.341365 | 0.71349  | 0.222949 | 0.576293 | 0.033417 | 0.036169 | 0.502025 |
| 0.646591 | 0.194936 | 0.219832 | 0.005892 | 0.05849  | 0.01719  | 0.026677 | 0.189489 | 0.144255 | 0.007    | 0.095367 | 0.011359 | 0.32395  | 0.190446 | 0.116699 |
| 0.035281 | 0.043618 | 0.037362 | 0.124499 | 0.123582 | 0.022251 | 0.334228 | 0.031124 | 0.034847 | 0.062999 | 0.058749 | 0.092496 | 0.033467 | 0.141476 | 0.064874 |
| 0.006371 | 0.020226 | 0.003411 | 0.006152 | 0.005094 | 0.019419 | 0.005712 | 0.02366  | 0.051805 | 0.008277 | 0.038469 | 0.014051 | 0.017231 | 0.010534 | 0.001421 |
| 0.001898 | 0.002684 | 0.01697  | 0.006379 | 0.001081 | 4.25E-04 | 0.007168 | 4.91E-04 | 0.012711 | 0.002403 | 0.001067 | 0.001678 | 0.002345 | 0.017744 | 0.003034 |
| 3.50E-05 | 3.65E-04 | 2.40E-04 | 0        | 0.001472 | 0.001182 | 0.019516 | 0        | 2.49E-04 | 0.001189 | 1.11E-04 | 5.83E-04 | 8.10E-05 | 0.002983 | 9.90E-05 |
| 0        | 0        | 3.70E-05 | 0        | 3.00E-05 | 0        | 0        | 0        | 0        | 0        | 0        | 0        | 0        | 0        | 0        |
| 0        | 0        | 1.17E-04 | 0        | 0        | 0        | 5.80E-05 | 0        | 0        | 1.90E-05 | 0        | 0        | 0        | 2.00E-05 | 0        |
| 0        | 3.30E-05 | 4.50E-05 | 0        | 4.90E-05 | 2.90E-05 | 6.72E-04 | 0        | 1.19E-04 | 3.10E-05 | 0        | 0        | 0        | 1.90E-05 | 0        |
| 0        | 0        | 1.14E-04 | 0        | 0        | 0        | 0        | 0        | 0        | 0        | 0        | 0        | 0        | 3.70E-05 | 0        |
| 0        | 3.10E-05 | 4.00E-05 | 0        | 0        | 0        | 0        | 0        | 0        | 0        | 0        | 0        | 0        | 0        | 0        |
| 0        | 0        | 1.33E-04 | 0        | 0        | 0        | 0        | 0        | 0        | 0        | 0        | 0        | 0        | 0        | 0        |
| 0        | 0        | 0        | 0        | 0        | 0        | 0        | 0        | 0        | 0        | 0        | 0        | 0        | 0        | 0        |
| 0        | 0        | 0        | 0        | 0        | 0        | 0        | 0        | 0        | 0        | 0        | 0        | 0        | 0        | 0        |
| 0        | 0        | 0        | 0        | 0        | 0        | 0        | 0        | 0        | 0        | 0        | 0        | 0        | 0        | 0        |
| 0        | 0        | 0        | 0        | 0        | 0        | 0        | 0        | 0        | 0        | 0        | 0        | 0        | 0        | 0        |
| 0        | 0        | 0        | 0        | 0        | 0        | 0        | 0        | 0        | 0        | 0        | 0        | 0        | 0        | 0        |
| 0        | 0        | 0        | 0        | 0        | 0        | 0        | 0        | 0        | 0        | 0        | 0        | 0        | 0        | 0        |

| HC068    | HC101    | HC113    | HC006    | HC143    | HC127    | HC063    | HC021    | HC027    | HC084    | HC125    | HC037    | HC082    | HC135    | HC108    |
|----------|----------|----------|----------|----------|----------|----------|----------|----------|----------|----------|----------|----------|----------|----------|
| 0.148853 | 0.132641 | 0.124692 | 0.12336  | 0.122621 | 0.113481 | 0.113328 | 0.112856 | 0.108969 | 0.10025  | 0.089271 | 0.076713 | 0.07484  | 0.051207 | 0.050104 |
| 0.118087 | 0.164711 | 0.309877 | 0.331147 | 0.325334 | 0.430718 | 0.354442 | 0.622155 | 0.616358 | 0.341012 | 0.165259 | 0.164693 | 0.09436  | 0.333913 | 0.419066 |
| 0.470933 | 0.434304 | 0.250253 | 0.208488 | 0.348877 | 0.144358 | 0.092824 | 0.06589  | 0.160989 | 0.078337 | 0.656523 | 0.453501 | 0.697156 | 0.36047  | 0.259099 |
| 0.016157 | 0.077324 | 0.116627 | 0.278475 | 0.13532  | 0.260927 | 0.368815 | 0.104557 | 0.074872 | 0.452397 | 0.013296 | 0.266382 | 0.077722 | 0.163342 | 0.100115 |
| 0.230409 | 0.164151 | 0.189004 | 0.01853  | 0.049624 | 0.009068 | 0.034094 | 0.055484 | 0.005182 | 0.007016 | 0.065056 | 0.03348  | 0.04896  | 0.077459 | 0.157722 |
| 0.005882 | 0.021001 | 0.005247 | 0.032447 | 0.002822 | 0.035536 | 0.026937 | 0.014709 | 0.028032 | 0.016005 | 0.0065   | 0.004217 | 1.08E-04 | 0.004851 | 0.001808 |
| 0.008701 | 0.004055 | 0.003028 | 0.007553 | 0.012607 | 0.005912 | 0.008631 | 0.018382 | 0.005556 | 0.004838 | 0.003545 | 7.26E-04 | 0.00175  | 0.00743  | 0.007745 |
| 9.13E-04 | 0.001712 | 0.001241 | 0        | 0.00262  | 0        | 6.59E-04 | 0.005785 | 4.20E-05 | 1.21E-04 | 2.28E-04 | 2.53E-04 | 0.004962 | 1.97E-04 | 0.003979 |
| 0        | 0        | 0        | 0        | 0        | 0        | 0        | 0        | 0        | 0        | 0        | 0        | 5.80E-05 | 2.50E-04 | 0        |
| 3.30E-05 | 0        | 0        | 0        | 0        | 0        | 9.70E-05 | 0        | 0        | 0        | 0        | 3.50E-05 | 0        | 5.18E-04 | 0        |
| 3.20E-05 | 1.01E-04 | 0        | 0        | 1.75E-04 | 0        | 1.73E-04 | 0        | 0        | 0        | 1.89E-04 | 0        | 8.40E-05 | 7.30E-05 | 8.70E-05 |
| 0        | 0        | 0        | 0        | 0        | 0        | 0        | 0        | 0        | 0        | 1.33E-04 | 0        | 0        | 1.53E-04 | 6.70E-05 |
| 0        | 0        | 0        | 0        | 0        | 0        | 0        | 1.82E-04 | 0        | 2.40E-05 | 0        | 0        | 0        | 1.09E-04 | 1.87E-04 |
| 0        | 0        | 0        | 0        | 0        | 0        | 0        | 0        | 0        | 0        | 0        | 0        | 0        | 2.80E-05 | 0        |
| 0        | 0        | 3.10E-05 | 0        | 0        | 0        | 0        | 0        | 0        | 0        | 0        | 0        | 0        | 0        | 2.10E-05 |
| 0        | 0        | 0        | 0        | 0        | 0        | 0        | 0        | 0        | 0        | 0        | 0        | 0        | 0        | 0        |
| 0        | 0        | 0        | 0        | 0        | 0        | 0        | 0        | 0        | 0        | 0        | 0        | 0        | 0        | 0        |
| 0        | 0        | 0        | 0        | 0        | 0        | 0        | 0        | 0        | 0        | 0        | 0        | 0        | 0        | 0        |
| 0        | 0        | 0        | 0        | 0        | 0        | 0        | 0        | 0        | 0        | 0        | 0        | 0        | 0        | 0        |

|          |          |          |          |          |          |
|----------|----------|----------|----------|----------|----------|
| HC024    | HC028    | HC103    | HC058    | HC078    | HC110    |
| 0.049186 | 0.046594 | 0.037966 | 0.036551 | 0.025923 | 0.01344  |
| 0.245986 | 0.146021 | 0.072384 | 0.225132 | 0.435346 | 0.44642  |
| 0.153483 | 0.596054 | 0.649563 | 0.581396 | 0.085791 | 0.078184 |
| 0.504842 | 0.069134 | 0.206965 | 0.128956 | 0.413268 | 0.433961 |
| 0.019162 | 0.122592 | 1.60E-04 | 0.022156 | 0.016746 | 0.007463 |
| 0.025198 | 0.017774 | 0.030891 | 0.001849 | 0.019559 | 0.02045  |
| 0.001349 | 0.001172 | 0.002071 | 0.002959 | 0.003246 | 8.20E-05 |
| 6.89E-04 | 2.92E-04 | 0        | 9.88E-04 | 1.21E-04 | 0        |
| 0        | 3.67E-04 | 0        | 0        | 0        | 0        |
| 0        | 0        | 0        | 0        | 0        | 0        |
| 7.50E-05 | 0        | 0        | 0        | 0        | 0        |
| 0        | 0        | 0        | 0        | 0        | 0        |
| 3.00E-05 | 0        | 0        | 0        | 0        | 0        |
| 0        | 0        | 0        | 1.30E-05 | 0        | 0        |
| 0        | 0        | 0        | 0        | 0        | 0        |
| 0        | 0        | 0        | 0        | 0        | 0        |
| 0        | 0        | 0        | 0        | 0        | 0        |
| 0        | 0        | 0        | 0        | 0        | 0        |
| 0        | 0        | 0        | 0        | 0        | 0        |

Table S18. The different degree of genus level (p value) among the CP (n=72), CPR (n=22), and HC (n=150) groups.

| ID                                   | CP-median                | CP-mean     | CP-se      | CPR-median               | CPR-mean    | CPR-se      |
|--------------------------------------|--------------------------|-------------|------------|--------------------------|-------------|-------------|
| Neisseria                            | 0.0409(0.0013,0.2161)    | 0.1693405   | 0.03052301 | 0.2107(0.0944,0.3182)    | 0.225529591 | 0.040427032 |
| Veillonella                          | 0.0957(0.0333,0.1656)    | 0.123503861 | 0.01366871 | 0.1388(0.0814,0.1952)    | 0.140847227 | 0.01424385  |
| Streptococcus                        | 0.0282(0.0107,0.0969)    | 0.084404306 | 0.01663492 | 0.0187(0.0096,0.0314)    | 0.022223545 | 0.003406369 |
| Porphyromonas                        | 0.0019(0.0004,0.0243)    | 0.028802181 | 0.00802842 | 0.0131(0.0036,0.043)     | 0.033213682 | 0.008548369 |
| Fusobacterium                        | 0.0065(0.0006,0.0343)    | 0.031441569 | 0.00668997 | 0.1293(0.0566,0.2007)    | 0.143166864 | 0.023540728 |
| Rothia                               | 0.0149(0.0038,0.0554)    | 0.059909708 | 0.01254935 | 0.0151(0.0069,0.0297)    | 0.024636045 | 0.00573989  |
| Leptotrichia                         | 0.0235(0.0074,0.1235)    | 0.107440542 | 0.01947248 | 0.0612(0.0204,0.1387)    | 0.091091227 | 0.021007726 |
| Actinomyces                          | 0.0355(0.0063,0.078)     | 0.059494778 | 0.00931038 | 0.0013(0.0006,0.0078)    | 0.005016773 | 0.001526311 |
| Haemophilus                          | 0.0017(0.0003,0.0073)    | 0.006837847 | 0.00159359 | 0.0204(0.011,0.0339)     | 0.029744182 | 0.006856576 |
| Granulicatella                       | 0.0034(0.0007,0.013)     | 0.014283167 | 0.00290292 | 0.0047(0.0031,0.0109)    | 0.009407636 | 0.002380606 |
| Bacteria_unclassified                | 0.007(0.0025,0.0179)     | 0.010237056 | 0.0010889  | 0.0028(0.0022,0.0045)    | 0.003505364 | 0.00042736  |
| Lachnoanaerobaculum                  | 0.0071(0.0016,0.0122)    | 0.011023028 | 0.0065178  | 0.0131(0.008,0.0217)     | 0.019196273 | 0.00416725  |
| Halomonas                            | <0.0001(<0.0001,0.0003)  | 0.001362458 | 0.00048464 | <0.0001(<0.0001,<0.0001) | 0.0000025   | 0.0000025   |
| Peptostreptococcus                   | 0.0014(0.0004,0.0048)    | 0.004911736 | 0.00093716 | 0.0031(0.0013,0.0058)    | 0.004009682 | 0.000740752 |
| Candidate_division_TM7_norank        | 0.0013(0.0001,0.0058)    | 0.007123278 | 0.00227417 | 0.0027(<0.0001,0.01)     | 0.006968182 | 0.002007771 |
| Family_XIII_incertae_sedis           | 0.0015(0.0004,0.0033)    | 0.002202208 | 0.00027315 | 0.0043(0.0031,0.0059)    | 0.004551455 | 0.000661117 |
| Oribacterium                         | 0.0018(0.0002,0.0055)    | 0.004123625 | 0.00065178 | 0.0061(0.0034,0.0097)    | 0.007498455 | 0.001626967 |
| Gemella                              | 0.0009(0.0002,0.0031)    | 0.005189875 | 0.0015193  | 0.0018(0.0002,0.0039)    | 0.002169364 | 0.000421645 |
| Actinobacteria_unclassified          | 0.0015(0.0004,0.0077)    | 0.006782958 | 0.00155676 | 0.0002(<0.0001,0.0006)   | 0.000540364 | 0.000196466 |
| Solobacterium                        | 0.0014(0.0004,0.0029)    | 0.003159542 | 0.00061514 | 0.0022(0.0013,0.0042)    | 0.002952955 | 0.000540656 |
| Capnocytophaga                       | 0.0004(<0.0001,0.0017)   | 0.003907542 | 0.001411   | 0.0065(0.002,0.0287)     | 0.015149    | 0.003692677 |
| Citrobacter                          | <0.0001(<0.0001,<0.0001) | 4.54E-06    | 3.06E-06   | <0.0001(<0.0001,<0.0001) | 0           | 0           |
| Firmicutes_unclassified              | 0.0018(0.0006,0.0049)    | 0.003762611 | 0.00055674 | 0.0009(0.0005,0.0015)    | 0.001176636 | 0.000194907 |
| Alloprevotella                       | 0.0009(0.0002,0.002)     | 0.002058597 | 0.000382   | 0.0085(0.0029,0.0123)    | 0.00865     | 0.001335948 |
| Pasteurellaceae_unclassified         | 0.0002(<0.0001,0.0011)   | 0.000891528 | 0.00018414 | 0.0015(0.0003,0.003)     | 0.002351591 | 0.000624475 |
| Megasphaera                          | 0.0023(0.0001,0.0062)    | 0.004972417 | 0.0008957  | 0.0008(0.0001,0.0064)    | 0.004153864 | 0.001206174 |
| Lactobacillales_unclassified         | 0.0006(0.0001,0.0019)    | 0.002340042 | 0.00050734 | 0.0002(<0.0001,0.0005)   | 0.000345182 | 8.86E-05    |
| Candidate_division_SR1_norank        | <0.0001(<0.0001,0.0001)  | 0.000708319 | 0.00035999 | <0.0001(<0.0001,0.0002)  | 0.000599091 | 0.000327171 |
| Atopobium                            | 0.0006(0.0002,0.0025)    | 0.002182333 | 0.00039324 | 0.0002(<0.0001,0.0007)   | 0.000536136 | 0.000149437 |
| Corynebacterium                      | <0.0001(<0.0001,0.0001)  | 0.001601528 | 0.00092244 | <0.0001(<0.0001,0.0001)  | 0.000662227 | 0.000420578 |
| Proteobacteria_unclassified          | <0.0001(<0.0001,0.0009)  | 0.001085486 | 0.00033134 | 0.0003(<0.0001,0.0006)   | 0.000578909 | 0.000206486 |
| Parvimonas                           | <0.0001(<0.0001,0.0002)  | 0.000481    | 0.00018242 | <0.0001(<0.0001,0.0006)  | 0.001642591 | 0.000903067 |
| Selenomonas                          | 0.0004(0.0001,0.002)     | 0.002283278 | 0.00049305 | 0.0003(<0.0001,0.0013)   | 0.001064091 | 0.000389271 |
| Campylobacter                        | 0.0003(0.0001,0.0008)    | 0.002180181 | 0.00098312 | 0.0032(0.0019,0.0054)    | 0.003802636 | 0.00061693  |
| Tannerella                           | <0.0001(<0.0001,0.0007)  | 0.00075075  | 0.00020074 | 0.0002(<0.0001,0.0019)   | 0.0011935   | 0.000389524 |
| Pelagibacterium                      | <0.0001(<0.0001,<0.0001) | 9.48E-05    | 3.10E-05   | <0.0001(<0.0001,<0.0001) | 0           | 0           |
| Bacilli_unclassified                 | 0.0002(<0.0001,0.0006)   | 0.000813069 | 0.00019479 | 0.0002(0.0001,0.0004)    | 0.000275273 | 4.67E-05    |
| Xanthomonadaceae_uncultured          | <0.0001(<0.0001,<0.0001) | 7.98E-05    | 2.44E-05   | <0.0001(<0.0001,<0.0001) | 0           | 0           |
| PSD1-392_norank                      | 0.0002(<0.0001,0.0005)   | 0.000845181 | 0.00021433 | <0.0001(<0.0001,0.0002)  | 0.000112091 | 2.74E-05    |
| Phyllobacteriaceae_unclassified      | <0.0001(<0.0001,<0.0001) | 6.75E-05    | 2.04E-05   | <0.0001(<0.0001,<0.0001) | 0           | 0           |
| Family_XIII_uncultured               | <0.0001(<0.0001,0.0002)  | 0.000258736 | 0.00012014 | <0.0001(<0.0001,0.0004)  | 0.000290364 | 9.68E-05    |
| Lactobacillus                        | <0.0001(<0.0001,<0.0001) | 3.07E-05    | 2.11E-05   | <0.0001(<0.0001,<0.0001) | 3.14E-06    | 3.14E-06    |
| Peptostreptococcaceae_incertae_sedis | <0.0001(<0.0001,<0.0001) | 9.64E-05    | 2.92E-05   | <0.0001(<0.0001,0.0002)  | 0.000228682 | 8.07E-05    |

Table S18. The different degree of phylum level (p value) among the CP (n=72), CPR (n=22), and HC (n=150) groups.

| ID                     | CP-median                | CP-mean     | CP-se      | CPR-median               | CPR-mean    | CPR-se      |
|------------------------|--------------------------|-------------|------------|--------------------------|-------------|-------------|
| Bacteroidetes          | 0.181(0.0727,0.3492)     | 0.248753778 | 0.02756193 | 0.1979(0.1079,0.2483)    | 0.222688773 | 0.037766355 |
| Firmicutes             | 0.2498(0.1318,0.4136)    | 0.279397347 | 0.02312548 | 0.225(0.1618,0.3053)     | 0.235882182 | 0.019110429 |
| Proteobacteria         | 0.0653(0.0066,0.2208)    | 0.183435556 | 0.03104087 | 0.2363(0.1267,0.3467)    | 0.263691045 | 0.040854463 |
| Actinobacteria         | 0.081(0.0258,0.1729)     | 0.130719931 | 0.01839212 | 0.0272(0.0087,0.039)     | 0.031620545 | 0.006607335 |
| Fusobacteria           | 0.06(0.0145,0.2065)      | 0.139158653 | 0.02086737 | 0.2265(0.1629,0.3117)    | 0.234518318 | 0.023990046 |
| Bacteria_unclassified  | 0.007(0.0025,0.0179)     | 0.010237056 | 0.0010889  | 0.0028(0.0022,0.0045)    | 0.003505364 | 0.00042736  |
| Candidate_division_TM7 | 0.0014(0.0001,0.0058)    | 0.007270111 | 0.00231183 | 0.0033(<0.0001,0.0103)   | 0.007439864 | 0.002066826 |
| Candidate_division_SR1 | <0.0001(<0.0001,0.0001)  | 0.000708319 | 0.00035999 | <0.0001(<0.0001,0.0002)  | 0.000599091 | 0.000327171 |
| Cyanobacteria          | <0.0001(<0.0001,<0.0001) | 0.000211708 | 0.00013044 | <0.0001(<0.0001,<0.0001) | 2.68182E-06 | 1.85092E-06 |
| Spirochaetae           | <0.0001(<0.0001,<0.0001) | 5.50278E-05 | 2.5922E-05 | <0.0001(<0.0001,<0.0001) | 4.09545E-05 | 1.23778E-05 |
| Tenericutes            | <0.0001(<0.0001,<0.0001) | 1.37917E-05 | 4.4439E-06 | <0.0001(<0.0001,<0.0001) | 7.40909E-06 | 3.04772E-06 |
| Synergistetes          | <0.0001(<0.0001,<0.0001) | 2.65694E-05 | 1.2101E-05 | <0.0001(<0.0001,<0.0001) | 3.77273E-06 | 2.63832E-06 |
| BD1-5                  | <0.0001(<0.0001,<0.0001) | 5.84722E-06 | 4.5329E-06 | <0.0001(<0.0001,<0.0001) | 0           | 0           |
| Chloroflexi            | <0.0001(<0.0001,<0.0001) | 2.91667E-06 | 2.9167E-06 | <0.0001(<0.0001,<0.0001) | 0           | 0           |
| Verrucomicrobia        | <0.0001(<0.0001,<0.0001) | 8.47222E-07 | 4.9712E-07 | <0.0001(<0.0001,<0.0001) | 0           | 0           |
| Deinococcus-Thermus    | <0.0001(<0.0001,<0.0001) | 2.16667E-06 | 2.1667E-06 | <0.0001(<0.0001,<0.0001) | 0           | 0           |
| Candidate_division_WS6 | <0.0001(<0.0001,<0.0001) | 0.000000375 | 3.75E-07   | <0.0001(<0.0001,<0.0001) | 0           | 0           |
| Planctomycetes         | <0.0001(<0.0001,<0.0001) | 0           | 0          | <0.0001(<0.0001,<0.0001) | 0           | 0           |
| Lentisphaerae          | <0.0001(<0.0001,<0.0001) | 0           | 0          | <0.0001(<0.0001,<0.0001) | 0           | 0           |

| HC-median                | HC-mean     | HC-se       | p-value     | z-score      | Sig_mark | q-value    |
|--------------------------|-------------|-------------|-------------|--------------|----------|------------|
| 0.0725(0.0187,0.2207)    | 0.135219593 | 0.012995629 | 0.042138934 | -2.032145445 | *        | 0.04997874 |
| 0.0673(0.0392,0.1032)    | 0.081430867 | 0.005125813 | 3.51E-04    | -3.574272468 | ***      | 5.97E-04   |
| 0.0574(0.0273,0.1124)    | 0.086816773 | 0.006818613 | 3.97E-06    | -4.612723151 | ***      | 8.11E-06   |
| 0.0368(0.0083,0.1229)    | 0.089659733 | 0.008995231 | 8.65E-11    | -6.488863672 | ***      | 6.30E-10   |
| 0.0391(0.0156,0.0889)    | 0.061503087 | 0.005358949 | 3.52E-11    | -6.623148603 | ***      | 3.59E-10   |
| 0.0417(0.0157,0.0797)    | 0.060120567 | 0.005555999 | 4.02E-04    | -3.53906458  | ***      | 6.40E-04   |
| 0.0093(0.0035,0.0238)    | 0.023951687 | 0.003269999 | 1.17E-07    | -5.297754632 | ***      | 3.99E-07   |
| 0.0363(0.0156,0.0617)    | 0.050174947 | 0.004302692 | 2.54E-09    | -5.958877446 | ***      | 1.07E-08   |
| 0.0252(0.009,0.0576)     | 0.050792713 | 0.005787283 | 5.34E-17    | -8.37894981  | ***      | 2.72E-15   |
| 0.0084(0.0039,0.0176)    | 0.012670913 | 0.00106482  | 0.00171952  | -3.134832895 | **       | 0.00219239 |
| 0.0099(0.0055,0.0176)    | 0.012363567 | 0.000716309 | 1.73E-07    | -5.226064537 | ***      | 5.52E-07   |
| 0.0065(0.0044,0.0094)    | 0.007548133 | 0.000403396 | 6.01E-04    | -3.431022744 | ***      | 8.76E-04   |
| <0.0001(<0.0001,0.0005)  | 0.013377553 | 0.005613441 | 1.48E-05    | -4.332326074 | ***      | 2.69E-05   |
| 0.0078(0.0041,0.0137)    | 0.010440727 | 0.000981109 | 2.36E-10    | -6.335711458 | ***      | 1.34E-09   |
| 0.005(0.002,0.009)       | 0.007743487 | 0.000731492 | 1.25E-05    | -4.369341677 | ***      | 2.35E-05   |
| 0.0058(0.0034,0.01)      | 0.008464187 | 0.000722895 | 4.13E-15    | -7.85087626  | ***      | 1.05E-13   |
| 0.0049(0.0028,0.0093)    | 0.007085967 | 0.000547102 | 1.89E-06    | -4.764987498 | ***      | 4.19E-06   |
| 0.0029(0.0013,0.0079)    | 0.00569286  | 0.000579421 | 6.18E-06    | -4.520024182 | ***      | 1.21E-05   |
| 0.0022(0.0007,0.0056)    | 0.0050344   | 0.000630628 | 1.70E-06    | -4.786269165 | ***      | 3.94E-06   |
| 0.0047(0.0025,0.0073)    | 0.005593433 | 0.000330242 | 2.13E-10    | -6.351817887 | ***      | 1.34E-09   |
| 0.0007(0.0002,0.0021)    | 0.002978507 | 0.000681859 | 7.52E-07    | -4.947380448 | ***      | 1.83E-06   |
| <0.0001(<0.0001,0.0033)  | 0.00570094  | 0.001452815 | 1.24E-09    | -6.075206165 | ***      | 5.74E-09   |
| 0.0025(0.0013,0.0046)    | 0.003272527 | 0.000225829 | 3.88E-04    | -3.547849614 | ***      | 6.39E-04   |
| 0.0006(0.0003,0.002)     | 0.002610173 | 0.000467285 | 4.54E-07    | -5.044722825 | ***      | 1.28E-06   |
| 0.0018(0.0004,0.0049)    | 0.00370466  | 0.000450618 | 2.73E-09    | -5.946844933 | ***      | 1.07E-08   |
| <0.0001(<0.0001,0.0004)  | 0.000862893 | 0.000216445 | 3.50E-10    | -6.274763539 | ***      | 1.79E-09   |
| 0.0013(0.0005,0.0031)    | 0.002571493 | 0.000269031 | 4.14E-07    | -5.062215641 | ***      | 1.24E-06   |
| 0.0009(0.0001,0.0033)    | 0.00306322  | 0.000534232 | 9.37E-15    | -7.747490179 | ***      | 1.59E-13   |
| 0.001(0.0004,0.0031)     | 0.002295987 | 0.00023976  | 4.51E-04    | -3.508514488 | ***      | 6.76E-04   |
| <0.0001(<0.0001,0.0002)  | 0.001901647 | 0.000776382 | 0.001498264 | -3.175019486 | **       | 0.00195927 |
| 0.0007(0.0002,0.0021)    | 0.0018915   | 0.000314869 | 4.78E-07    | -5.034804785 | ***      | 1.28E-06   |
| 0.0005(<0.0001,0.0021)   | 0.001820333 | 0.000238948 | 5.28E-11    | -6.56288148  | ***      | 4.49E-10   |
| 0.0001(<0.0001,0.0005)   | 0.000925193 | 0.000259167 | 0.001219302 | -3.234325979 | **       | 0.00163643 |
| <0.0001(<0.0001,0.0003)  | 0.000318193 | 5.80E-05    | 2.33E-13    | -7.328467598 | ***      | 2.97E-12   |
| 0.0002(<0.0001,0.0007)   | 0.001123933 | 0.00027285  | 0.023403482 | -2.266783059 | *        | 0.02841851 |
| <0.0001(<0.0001,0.0001)  | 0.001294933 | 0.000530467 | 2.23E-04    | -3.690902306 | ***      | 3.93E-04   |
| 0.0004(0.0002,0.001)     | 0.00088414  | 0.00010204  | 7.69E-04    | -3.363883427 | ***      | 0.00108877 |
| <0.0001(<0.0001,<0.0001) | 0.001052047 | 0.000502574 | 0.003126965 | -2.954972949 | **       | 0.00388964 |
| 0.0003(<0.0001,0.0007)   | 0.000596793 | 8.03E-05    | 0.001139034 | -3.253722754 | **       | 0.00157002 |
| <0.0001(<0.0001,<0.0001) | 0.000740507 | 0.000300798 | 4.37E-04    | -3.516619243 | ***      | 6.75E-04   |
| 0.0002(<0.0001,0.0004)   | 0.00041328  | 9.73E-05    | 2.95E-06    | -4.674489947 | ***      | 6.26E-06   |
| <0.0001(<0.0001,0.0001)  | 0.000488073 | 0.000146781 | 3.40E-08    | -5.519531295 | ***      | 1.24E-07   |
| <0.0001(<0.0001,0.0003)  | 0.000340433 | 9.23E-05    | 6.11E-07    | -4.987734846 | ***      | 1.56E-06   |

| HC-median                | HC-mean     | HC-se       | p-value     | z-score      | Sig_mark | q-value    |
|--------------------------|-------------|-------------|-------------|--------------|----------|------------|
| 0.2995(0.189,0.4036)     | 0.309290953 | 0.01271501  | 1.49E-04    | -3.792707736 | ***      | 3.89E-04   |
| 0.2245(0.1604,0.3175)    | 0.245072513 | 0.009725772 | 0.779362175 | -0.280150327 |          | 0.77936217 |
| 0.1624(0.0576,0.3316)    | 0.215766353 | 0.015174829 | 5.14E-04    | -3.473497209 | ***      | 0.00108453 |
| 0.0869(0.0433,0.1479)    | 0.120082973 | 0.008996637 | 4.78E-06    | -4.574295725 | ***      | 1.82E-05   |
| 0.0574(0.0286,0.1233)    | 0.085738087 | 0.006490548 | 2.70E-06    | -4.692297307 | ***      | 1.28E-05   |
| 0.0099(0.0055,0.0176)    | 0.012363567 | 0.000716309 | 1.73E-07    | -5.226064537 | ***      | 1.64E-06   |
| 0.0057(0.0024,0.0103)    | 0.008449173 | 0.00075925  | 1.79E-06    | -4.775866263 | ***      | 1.13E-05   |
| 0.0009(0.0001,0.0033)    | 0.00306322  | 0.000534232 | 9.37E-15    | -7.747490179 | ***      | 1.78E-13   |
| <0.0001(<0.0001,<0.0001) | 0.00000942  | 3.38651E-06 | 0.002393774 | -3.036455526 | **       | 0.00454817 |
| <0.0001(<0.0001,<0.0001) | 0.00005248  | 2.80976E-05 | 0.032303339 | -2.140636794 | *        | 0.05579668 |
| <0.0001(<0.0001,<0.0001) | 7.02267E-05 | 1.13104E-05 | 7.21E-06    | -4.487332494 | ***      | 2.28E-05   |
| <0.0001(<0.0001,<0.0001) | 1.32467E-05 | 3.10101E-06 | 0.519898212 | -0.643502317 |          | 0.70557614 |
| <0.0001(<0.0001,<0.0001) | 0.0000233   | 6.74185E-06 | 1.64E-04    | -3.76947513  | ***      | 3.89E-04   |
| <0.0001(<0.0001,<0.0001) | 0.00000178  | 9.7172E-07  | 0.396383479 | -0.848097849 |          | 0.62760718 |
| <0.0001(<0.0001,<0.0001) | 2.15333E-06 | 8.53823E-07 | 0.513880239 | -0.65280773  |          | 0.70557614 |
| <0.0001(<0.0001,<0.0001) | 1.86667E-07 | 1.86667E-07 | 0.772146625 | -0.289568165 |          | 0.77936217 |
| <0.0001(<0.0001,<0.0001) | 1.33333E-07 | 1.33333E-07 | 0.772146625 | -0.289568165 |          | 0.77936217 |
| <0.0001(<0.0001,<0.0001) | 0.00000016  | 0.00000016  | 0.731006203 | -0.343787365 |          | 0.77936217 |
| <0.0001(<0.0001,<0.0001) | 7.33333E-08 | 7.33333E-08 | 0.731006203 | -0.343787365 |          | 0.77936217 |

Table S19. The relative abundance and distribution of the key 90 OTUs among the CP (n=72), CPR (n=22), and HC (n=150) groups.

|                                         | CP01     | CP53     | CP52     | CP51     | CP50     | CP49     | CP48     | CP54     | CP47     | CP45     | CP44     |
|-----------------------------------------|----------|----------|----------|----------|----------|----------|----------|----------|----------|----------|----------|
| OTU1994 (Bacteria_unclassified)         | 0        | 0.000369 | 0.000502 | 0        | 0        | 0.000716 | 0        | 0        | 0        | 0        | 0        |
| OTU2854 (Actinobacteria_unclassified)   | 0        | 0        | 0.000295 | 0        | 0        | 0.002088 | 0.00094  | 0        | 0        | 0        | 0        |
| OTU1182 (Megasphaera)                   | 0        | 0.004026 | 0.179142 | 0.000412 | 6.91E-05 | 0.117758 | 0.00233  | 0        | 0        | 0.000539 | 0        |
| OTU945 (Veillonella)                    | 0        | 0.000365 | 0.000513 | 0        | 0.000185 | 0.012204 | 0.007588 | 0        | 0.000347 | 0.001524 | 0        |
| OTU1844 (Megasphaera)                   | 0        | 0.000609 | 0.004562 | 0        | 6.24E-05 | 0.032322 | 0.008254 | 0        | 0        | 0.000576 | 0        |
| OTU2254 (Bacteria_unclassified)         | 0.006696 | 7.30E-05 | 0.001342 | 0        | 0.000396 | 0.001095 | 0.043687 | 0.007014 | 0.007722 | 0.0021   | 0.003395 |
| OTU386 (Actinomyces)                    | 0.002467 | 0        | 0        | 0        | 0.002792 | 0.001453 | 0.001586 | 0.002349 | 0        | 0.000576 | 0        |
| OTU2815 (Actinomyces)                   | 0.011668 | 0.000118 | 0        | 0        | 0.014024 | 0.012056 | 0.037969 | 0.009677 | 0.001716 | 0.00983  | 0.004031 |
| OTU1279 (Family_XIII_Incertae_Sedis)    | 0.011739 | 0.010077 | 0.012627 | 0.006692 | 6.24E-05 | 0.027199 | 0.012503 | 0.004814 | 0.014824 | 0.139834 | 0.012969 |
| OTU1166 (Solobacterium)                 | 0.000942 | 0.008835 | 0.033548 | 0.02972  | 0.001045 | 0.009184 | 0.005238 | 0.002448 | 0.002172 | 0.08429  | 0.000733 |
| OTU1843 (Candidatus_Saccharimonas)      | 0        | 0.001339 | 0.008851 | 0        | 0        | 0        | 0.000901 | 0        | 0        | 0        | 0        |
| OTU2467 (Family_XIII_uncultured)        | 0        | 0.000402 | 0        | 0        | 0        | 0        | 0.000421 | 0        | 0        | 0.002843 | 0.000667 |
| OTU2618 (Catonella)                     | 0.000224 | 0.00084  | 0.000709 | 0.001207 | 0        | 0.000142 | 0.001508 | 0        | 0        | 0.006597 | 0.01699  |
| OTU1452 (Oribacterium)                  | 0        | 0.00194  | 0.006788 | 0.000294 | 0        | 0        | 0.001459 | 0.002498 | 0.000306 | 0.002806 | 0.0014   |
| OTU2540 (Oribacterium)                  | 0.000583 | 0.016546 | 0.036625 | 0.004282 | 0        | 0.001473 | 0.008126 | 0.009445 | 0.007409 | 0.087895 | 0.026877 |
| OTU1051 (Citrobacter)                   | 0        | 0        | 0        | 0.000836 | 0        | 0        | 0        | 0        | 0        | 0        | 0        |
| OTU1800 (Aggregatibacter)               | 0        | 0        | 0        | 3.67E-05 | 0        | 0        | 0        | 0        | 0        | 0        | 0        |
| OTU1645 (Prevotella)                    | 0.000961 | 0.010345 | 0.003743 | 0.023024 | 0.518827 | 0.004129 | 0        | 0.013366 | 0.000225 | 0.005686 | 0.005487 |
| OTU1513 (Candidate_division_TM7_norank) | 0        | 0        | 0        | 0        | 0        | 0        | 0        | 0        | 0        | 0        | 0        |
| OTU2876 (Candidate_division_TM7_norank) | 0        | 0        | 0        | 0        | 0        | 0        | 0        | 0.01454  | 0        | 0        | 0        |
| OTU1794 (Gemella)                       | 0.000269 | 0.001554 | 0.001441 | 0.042048 | 0.002883 | 0.00396  | 0.008087 | 0        | 0.000947 | 0.031479 | 0.006262 |
| OTU744 (Corynebacterium)                | 0        | 0        | 0        | 6.93E-05 | 0        | 0        | 0        | 0        | 0        | 0        | 0        |
| OTU1215 (Halomonas)                     | 0.002941 | 6.09E-05 | 0        | 0.081079 | 0.003583 | 0.011373 | 0.001684 | 0        | 0.00207  | 0.003605 | 0        |
| OTU2580 (Actinomyces)                   | 0.117274 | 0.000357 | 0        | 0.000938 | 0.006924 | 0.069908 | 0.011779 | 0.006981 | 0        | 0.001394 | 0.002036 |
| OTU2429 (Actinobacteria_unclassified)   | 0.35944  | 0.001217 | 0        | 0        | 0.00759  | 0.004298 | 0.027052 | 0.025887 | 0        | 0.000334 | 0.005354 |
| OTU2734 (Actinomyces)                   | 0.031718 | 0.000252 | 0        | 4.89E-05 | 0.00367  | 0.001365 | 0.011436 | 0.014275 | 0.001171 | 0.006597 | 0        |
| OTU3101 (Actinomyces)                   | 0.001198 | 0        | 0        | 0        | 0.006216 | 0.000345 | 0.00187  | 0        | 0        | 0.000502 | 0        |
| OTU1475 (Actinomyces)                   | 0.072292 | 0.000166 | 0.000371 | 0.000551 | 0.053695 | 0.008062 | 0.014119 | 0.002266 | 0.000252 | 0.001412 | 0.000662 |
| OTU376 (Actinomyces)                    | 0.086587 | 6.09E-05 | 0        | 0.003242 | 0.023926 | 0.037295 | 0.039967 | 0.016839 | 0.000504 | 0.000799 | 0.00201  |
| OTU2613 (Actinomyces)                   | 0.118165 | 0.000718 | 0.000939 | 0.033378 | 0.249797 | 0.383874 | 0.283576 | 0.0859   | 0.00907  | 0.021203 | 0.001421 |
| OTU1343 (Actinomyces)                   | 0.116447 | 0.000475 | 0.00155  | 4.08E-05 | 0.091176 | 0.007163 | 0.147863 | 0.005012 | 0.002492 | 0.009291 | 0.001405 |
| OTU2312 (Actinomyces)                   | 0.015372 | 5.68E-05 | 0        | 0.001272 | 0.007133 | 0.019097 | 0.140167 | 0        | 0.000824 | 0.002081 | 0        |
| OTU1055 (Prevotella)                    | 0.002127 | 0.00082  | 0        | 0        | 0        | 0.002075 | 0.000891 | 0.002399 | 0.001287 | 0.059483 | 0.000672 |
| OTU1995 (Veillonella)                   | 0.00173  | 0.000414 | 0        | 4.89E-05 | 0.001789 | 0.002554 | 0.003055 | 0        | 0.000306 | 0.002471 | 0        |
| OTU281 (Lactobacillales_unclassified)   | 0.000474 | 0        | 0        | 0        | 0        | 0        | 0.000548 | 0.004483 | 0        | 0        | 0        |
| OTU2136 (Streptococcus)                 | 0        | 0        | 0        | 6.93E-05 | 0        | 0.000351 | 0.000989 | 0.057482 | 0.000286 | 0        | 0        |
| OTU2889 (Streptococcus)                 | 0.009086 | 0.000499 | 0.017734 | 0.000759 | 0.000196 | 0.000399 | 0.001958 | 0.085569 | 0.00032  | 0.001394 | 0        |
| OTU2249 (Solobacterium)                 | 0        | 0.000235 | 0        | 0        | 0.000137 | 0        | 0.001048 | 0        | 0.000232 | 0.008827 | 0        |
| OTU2344 (Streptococcus)                 | 0.000564 | 7.71E-05 | 0        | 0        | 0.000123 | 0        | 0.000539 | 0        | 0.000722 | 0.027874 | 0        |
| OTU2027 (Leptotrichia)                  | 0.002256 | 0.008003 | 0.299844 | 0.065215 | 0        | 0.002007 | 0.000539 | 0        | 0.052624 | 0.019326 | 0.044283 |
| OTU1440 (Leptotrichia)                  | 0        | 0.000519 | 0.000939 | 0        | 0        | 0        | 0        | 0        | 0.002261 | 0.001357 | 0.006246 |
| OTU972 (Leptotrichia)                   | 0        | 0.000597 | 0.001866 | 0        | 0        | 0        | 0.000431 | 0        | 0.026101 | 0.002063 | 0.037467 |
| OTU1801 (Fusobacterium)                 | 0.000404 | 0.337217 | 0.284336 | 0.279515 | 8.09E-05 | 0.000906 | 0.027248 | 0.064909 | 0.752666 | 0.286821 | 0.73821  |
| OTU486 (Campylobacter)                  | 0        | 0        | 0        | 0        | 0        | 0.000216 | 0        | 0        | 0        | 0        | 0        |
| OTU1072 (Bergeyella)                    | 0.000295 | 0.000511 | 0.000851 | 0.006904 | 0        | 0.000642 | 0        | 0        | 0        | 0        | 0        |
| OTU1060 (Capnocytophaga)                | 0.000276 | 6.90E-05 | 0        | 0.001248 | 0        | 0.00196  | 0        | 0        | 0        | 0        | 0        |
| OTU1888 (Capnocytophaga)                | 0.005869 | 0.009744 | 0.000447 | 0.020423 | 0        | 0.022341 | 0        | 0        | 0.000306 | 0        | 0        |
| OTU1817 (Bacteria_unclassified)         | 0        | 6.49E-05 | 0        | 0        | 0        | 0        | 0        | 0        | 0.001001 | 0.003029 | 0        |
| OTU317 (Leptotrichia)                   | 0.004825 | 0.000649 | 0.002881 | 0.000118 | 0.000123 | 0.000764 | 0.033289 | 0.002432 | 0.015063 | 0.023377 | 0.010805 |
| OTU1189 (Leptotrichia)                  | 0        | 6.49E-05 | 0.002379 | 0.000812 | 0        | 0.001331 | 0.01452  | 0.002448 | 0        | 0        | 0        |
| OTU1681 (Prevotella)                    | 0        | 7.71E-05 | 0        | 0        | 0        | 0        | 0        | 0        | 0        | 0        | 0        |
| OTU2855 (Lautropia)                     | 0        | 0.010288 | 0.000382 | 0.00084  | 0.002554 | 0.000649 | 0        | 0.00703  | 0.000252 | 0        | 0        |
| OTU826 (Prevotella)                     | 0.000199 | 0        | 0        | 0        | 0        | 0        | 0        | 0        | 0.00064  | 0        | 0        |
| OTU1271 (Prevotella)                    | 0        | 0.020827 | 0.00048  | 0.006598 | 0        | 0.019651 | 0        | 0        | 0.04879  | 0.026703 | 0        |
| OTU1799 (Campylobacter)                 | 0        | 0.000414 | 0        | 0.033619 | 0        | 0.000155 | 0        | 0        | 0.006101 | 0.000502 | 0        |
| OTU2149 (Campylobacter)                 | 0.001057 | 0        | 0.000316 | 0.001953 | 0.000654 | 0.012921 | 0.007108 | 0.004714 | 0        | 0        | 0.000626 |

|                                         |          |          |          |          |          |          |          |          |          |          |          |
|-----------------------------------------|----------|----------|----------|----------|----------|----------|----------|----------|----------|----------|----------|
| OTU3065 (Alloprevotella)                | 0        | 0.009403 | 0.000371 | 0.00356  | 0        | 0.040782 | 0.000539 | 0.002498 | 0        | 0.002193 | 0        |
| OTU2146 (Alloprevotella)                | 0        | 0.010949 | 0        | 0.002129 | 0        | 0.003034 | 0        | 0.004615 | 0        | 0.005593 | 0        |
| OTU3060 (Alloprevotella)                | 0        | 0.007017 | 0.001102 | 0.001517 | 7.25E-05 | 0.037424 | 0        | 0        | 0.000354 | 0.001561 | 0        |
| OTU2297 (Bacteria_unclassified)         | 0.000948 | 7.71E-05 | 0        | 0        | 0        | 0.000338 | 0        | 0        | 0        | 0        | 0        |
| OTU1526 (Porphyromonas)                 | 0.000634 | 0.001587 | 0        | 0        | 0        | 0        | 0        | 0        | 0        | 0        | 0        |
| OTU2500 (Porphyromonas)                 | 0.000378 | 0.000446 | 0.000393 | 0        | 0        | 0        | 0        | 0        | 0        | 0        | 0        |
| OTU790 (Porphyromonas)                  | 0.000192 | 0.000548 | 0        | 0        | 0        | 0        | 0        | 0.018808 | 0        | 0        | 0        |
| OTU2733 (Bacteria_unclassified)         | 0        | 0.001177 | 0        | 0        | 4.89E-05 | 0.00052  | 0        | 0        | 0        | 0        | 0        |
| OTU2118 (Porphyromonas)                 | 0        | 0.000593 | 0        | 0.000799 | 0        | 0.000128 | 0        | 0        | 0        | 0        | 0        |
| OTU1520 (Porphyromonas)                 | 0.003306 | 0.403088 | 0.045956 | 0.13844  | 0        | 0.023692 | 0        | 0.033282 | 0.00207  | 0.004943 | 0.014334 |
| OTU2886 (Porphyromonas)                 | 0.000218 | 0.019289 | 0        | 0.010464 | 0        | 0.002852 | 0.00046  | 0        | 0        | 0        | 0.002687 |
| OTU1616 (Haemophilus)                   | 0.000282 | 0        | 0        | 0        | 0        | 0        | 0        | 0        | 0        | 0.000502 | 0        |
| OTU1275 (Fusobacterium)                 | 0        | 0.000268 | 0        | 0        | 0        | 0        | 0.00045  | 0.002465 | 0.001546 | 0        | 0        |
| OTU1876 (Haemophilus)                   | 0.000397 | 0.00754  | 0.002576 | 0.03275  | 0        | 0.009711 | 0.00048  | 0.040725 | 0.003023 | 0.005092 | 0        |
| OTU2186 (Haemophilus)                   | 0.002589 | 0.03551  | 0.009789 | 0.162223 | 5.06E-05 | 0.040201 | 0.002536 | 0.085338 | 0.01494  | 0.011261 | 0.000728 |
| OTU1463 (Rothia)                        | 0.001903 | 0.000166 | 0        | 0        | 0        | 0.000115 | 0        | 0        | 0        | 0        | 0        |
| OTU1570 (Bacteria_unclassified)         | 0        | 8.12E-05 | 0        | 0        | 0        | 0.000297 | 0.000911 | 0.007212 | 0        | 0.001933 | 0        |
| OTU1631 (Bacteria_unclassified)         | 0        | 0.000231 | 0        | 0        | 0        | 0.000595 | 0        | 0.004764 | 0        | 0.000557 | 0        |
| OTU2587 (Fusobacterium)                 | 0        | 0.000122 | 0        | 0        | 0        | 0        | 0        | 0        | 0.000266 | 0.001171 | 0.001364 |
| OTU2311 (Neisseria)                     | 0        | 0.006359 | 0        | 0        | 0.000113 | 0        | 0.075253 | 0.302676 | 0.001798 | 0.004423 | 0.008934 |
| OTU1907 (Pasteurellaceae_unclassified)  | 0.000192 | 0.001392 | 0        | 0        | 0        | 0        | 0.005111 | 0.009164 | 0.002077 | 0.004869 | 0        |
| OTU1943 (Haemophilus)                   | 0.000199 | 0.002419 | 0        | 9.79E-05 | 0        | 0        | 0.000979 | 0.021587 | 0.001389 | 0.002137 | 0        |
| OTU905 (Prevotella)                     | 0        | 0.000203 | 0        | 0        | 0        | 0.000101 | 0        | 0        | 0        | 0.001264 | 0        |
| OTU1103 (Prevotella)                    | 0        | 0.000609 | 0        | 0        | 0        | 0.000149 | 0        | 0        | 0        | 0        | 0        |
| OTU2115 (Prevotella)                    | 0        | 0.003129 | 0        | 2.85E-05 | 0        | 0.000791 | 0        | 0        | 0.000633 | 0.005315 | 0        |
| OTU779 (Lachnoanaerobaculum)            | 0        | 0.001303 | 0.000742 | 4.49E-05 | 0        | 0.00123  | 0        | 0        | 0.00459  | 0.019976 | 0.004744 |
| OTU2315 (Prevotella)                    | 0        | 0.001347 | 0.000371 | 0        | 0        | 0        | 0        | 0.004929 | 0.004242 | 0.014234 | 0.001344 |
| OTU2014 (Fusobacterium)                 | 0        | 0.001534 | 0        | 0.000106 | 0        | 0        | 0.001008 | 0.007162 | 0        | 0.000316 | 0.033042 |
| OTU2471 (Rothia)                        | 0.002396 | 7.71E-05 | 0        | 0        | 0        | 0        | 0        | 0        | 0        | 0        | 0.0014   |
| OTU274 (Fusobacterium)                  | 0        | 0.006303 | 0.01744  | 0.00033  | 0        | 0.000385 | 0        | 0        | 0.001273 | 0        | 0        |
| OTU2627 (Fusobacterium)                 | 0        | 0.00209  | 0.01171  | 0.000192 | 0        | 0        | 0        | 0        | 0.000497 | 0        | 0.001415 |
| OTU2298 (Candidate_division_SR1_norank) | 0        | 0.002496 | 0        | 0        | 0        | 0        | 0        | 0        | 0        | 0        | 0        |
| OTU641 (Filifactor)                     | 0.000218 | 0.005978 | 0        | 0        | 0        | 0        | 0        | 0        | 0        | 0        | 0        |
| OTU2273 (Parvimonas)                    | 0        | 0.014776 | 0.003547 | 2.45E-05 | 0        | 0.000176 | 0        | 0        | 0.000293 | 0.025644 | 0        |

| CP43     | CP42     | CP40     | CP39     | CP46     | CP55     | CP56     | CP57     | CP72     | CP71     | CP70     | CP69     | CP68     | CP67     | CP66     |
|----------|----------|----------|----------|----------|----------|----------|----------|----------|----------|----------|----------|----------|----------|----------|
| 0.002078 | 0        | 0.001217 | 0.000408 | 0.000483 | 0.000848 | 0        | 0.001169 | 0        | 0.000412 | 0        | 0.001022 | 0        | 0        | 0.000344 |
| 0.009813 | 0.000818 | 0.001559 | 0.006982 | 0.000675 | 0.00252  | 0.002747 | 0        | 0        | 0.000348 | 0        | 0.007549 | 0        | 0        | 0.003229 |
| 0.016242 | 0.003126 | 0.005716 | 0.014505 | 0.007408 | 0.008835 | 0.002768 | 0.003451 | 0.017241 | 0.054948 | 0        | 0.028059 | 0.000201 | 0.027625 | 0.035675 |
| 0.013435 | 0.002344 | 0.00653  | 0.015129 | 0.002117 | 0.010673 | 0        | 0.009583 | 0.000787 | 0.020871 | 0        | 0.060611 | 0        | 0.000536 | 0.007548 |
| 0.111417 | 0.005365 | 0.020673 | 0.035323 | 0.014004 | 0.047776 | 0.010965 | 0.067458 | 0.00105  | 0.027913 | 0        | 0.278952 | 0        | 0        | 0.041083 |
| 0.028039 | 0.006762 | 0.003019 | 0.013004 | 0.024273 | 0.006717 | 0.008196 | 0.002424 | 0        | 0.001427 | 0        | 0.005454 | 0        | 0        | 0.000296 |
| 0.004692 | 0.003132 | 0.003153 | 0.00814  | 0.000376 | 0.001641 | 0        | 0.003555 | 0        | 0.000933 | 0        | 0.011485 | 0        | 0        | 0.001662 |
| 0.057915 | 0.024906 | 0.031046 | 0.035105 | 0.008904 | 0.029296 | 0.016937 | 0.019526 | 0.00065  | 0.028773 | 0        | 0.082791 | 0.000977 | 0        | 0.014876 |
| 0.002068 | 0.019166 | 0.006798 | 0.003424 | 0.002776 | 0.014078 | 0.021951 | 0.003717 | 0.023366 | 0.030684 | 0.001488 | 0.096198 | 0.000383 | 0.000316 | 0.023876 |
| 0        | 0.009432 | 0.002627 | 0.013486 | 0.009449 | 0.051485 | 0.002681 | 0.009925 | 0.055698 | 0.031288 | 0.000354 | 0.010544 | 0.005986 | 0.033226 | 0.002436 |
| 0        | 0.000726 | 0.000372 | 0.000597 | 0        | 0.002049 | 0        | 0        | 0.002673 | 0        | 0.000402 | 0        | 9.85E-05 | 0        | 0        |
| 0        | 0        | 0        | 0        | 0        | 0.000415 | 0        | 0        | 0.000513 | 0        | 0        | 0        | 0        | 0        | 0        |
| 0        | 0.01297  | 0.00223  | 0.001721 | 0.001089 | 0        | 0.005515 | 0        | 0.005183 | 0.005049 | 0        | 0.00086  | 0        | 0.000187 | 0        |
| 0        | 0.002966 | 0.001241 | 0.012484 | 0.000322 | 0        | 0.00255  | 0.006227 | 0.00095  | 0.001216 | 0        | 0        | 0        | 9.57E-05 | 0.000239 |
| 0.001375 | 0.018397 | 0.030987 | 0.01179  | 0.00349  | 0.014951 | 0.007956 | 0.01618  | 0.042507 | 0.005853 | 0.000354 | 0.002024 | 0.000152 | 8.61E-05 | 0        |
| 0        | 0        | 0        | 0        | 0        | 0        | 0        | 0        | 0.00027  | 0        | 0        | 0        | 0        | 9.09E-05 | 0        |
| 0        | 0        | 0        | 0        | 0        | 0        | 0        | 0        | 0        | 0        | 0        | 0        | 0        | 0        | 0        |
| 0        | 0.000788 | 0.000338 | 0.000219 | 0.00839  | 0.024646 | 0.002616 | 0.001103 | 7.33E-05 | 0.095446 | 0.003969 | 0.001791 | 0.000246 | 0.097095 | 0.004729 |
| 0        | 0        | 0        | 0        | 0        | 0.00044  | 0        | 0        | 0        | 0        | 0        | 0        | 0        | 0        | 0        |
| 0        | 0        | 0        | 0        | 0        | 0        | 0.002681 | 0        | 0        | 0        | 0        | 0        | 0        | 0        | 0        |
| 0.000687 | 0.015068 | 0.069114 | 0.005077 | 0.017517 | 0.002514 | 0.011095 | 0        | 0.238179 | 0.000393 | 0.010513 | 0.000992 | 0.005273 | 0.00022  | 0        |
| 0        | 0        | 0        | 0        | 0        | 0.002588 | 0        | 0        | 0        | 0        | 0        | 0        | 0        | 0.005328 | 0        |
| 0        | 0.002972 | 0.001385 | 0        | 0.001833 | 0.00039  | 0        | 0        | 0.008572 | 0.00268  | 0.117907 | 0        | 0.011956 | 0.110449 | 0.000965 |
| 0.045971 | 0.019197 | 0.032541 | 0.008061 | 0.002983 | 0.004841 | 0.002747 | 0.024299 | 0.014764 | 0.198438 | 0        | 0.016079 | 0.017396 | 7.65E-05 | 0.194772 |
| 0.037087 | 0.051603 | 0.046028 | 0.01402  | 0.014334 | 0.009299 | 0.01552  | 0.052115 | 0.003306 | 0.007372 | 0        | 0.004705 | 0.006955 | 0        | 0.011943 |
| 0.012773 | 0.050601 | 0.04069  | 0.022014 | 0.005729 | 0.03727  | 0.007673 | 0.01444  | 0.002243 | 0.001793 | 0        | 0.006577 | 9.09E-05 | 0        | 0.002503 |
| 0.002556 | 0.000714 | 0.001251 | 0.003406 | 0.00543  | 0.001659 | 0        | 0.002567 | 0.000367 | 0.001518 | 0        | 0.002955 | 0.000174 | 0        | 0.001452 |
| 0.014899 | 0.014028 | 0.01457  | 0.011072 | 0.03422  | 0.010611 | 0        | 0.004753 | 0.00298  | 0.011057 | 0        | 0.00087  | 0.000844 | 0.000512 | 0.022796 |
| 0.065651 | 0.038301 | 0.056879 | 0.064523 | 0.04465  | 0.032317 | 0.016371 | 0.052466 | 0.004819 | 0.016975 | 0.000354 | 0.009572 | 0.006126 | 0.001    | 0.019729 |
| 0.488129 | 0.239596 | 0.470791 | 0.548771 | 0.567838 | 0.167356 | 0.152283 | 0.255687 | 0.029789 | 0.241231 | 0.006095 | 0.200846 | 0.079172 | 0.009451 | 0.477423 |
| 0.024502 | 0.023787 | 0.01163  | 0.016614 | 0.019004 | 0.009157 | 0.011183 | 0.032541 | 0.003289 | 0.031846 | 0        | 0.019155 | 0.012994 | 0.00022  | 0.007691 |
| 0.025116 | 0.013825 | 0.009142 | 0.018546 | 0.017678 | 0.001733 | 0.005515 | 0.040488 | 0.003116 | 0.024035 | 0        | 0.010847 | 0.008539 | 0.00045  | 0.019395 |
| 0.002545 | 0.011715 | 0.015702 | 0.002414 | 0.000245 | 0.021093 | 0.002594 | 0.001131 | 0.00133  | 0.001683 | 0.004323 | 0.005535 | 0        | 0        | 0.001156 |
| 0.007531 | 0.002338 | 0.003868 | 0.000853 | 0.00089  | 0.004488 | 0.005864 | 0.004734 | 0.000187 | 0.006402 | 0.000307 | 0.015117 | 0.000833 | 0.000163 | 0.003516 |
| 0        | 0.004024 | 0.00068  | 0.001186 | 0        | 0        | 0.002877 | 0.002424 | 0.002693 | 0        | 0        | 0        | 0.000553 | 0        | 0        |
| 0        | 0.032807 | 0.044871 | 0.025977 | 0        | 0.002068 | 0.048327 | 0.010657 | 0.176792 | 0.006109 | 0.000945 | 0        | 0.280458 | 0        | 0.000287 |
| 0        | 0.031644 | 0.044688 | 0.023103 | 0        | 0.002928 | 0.075575 | 0.027978 | 0.237742 | 0.008826 | 0.002717 | 0        | 0.462776 | 0.001736 | 0.001041 |
| 0        | 0.001594 | 0.000655 | 0.000808 | 0.000683 | 0.002433 | 0        | 0        | 0.002786 | 0.000293 | 0        | 0        | 6.44E-05 | 0        | 0        |
| 0.00075  | 0.005421 | 0.004479 | 0.001544 | 0.000851 | 0.019799 | 0        | 0        | 0.003506 | 0.00022  | 0        | 0        | 9.47E-05 | 0        | 0        |
| 0        | 0        | 0.000675 | 0.001052 | 0.006496 | 0.003777 | 0.003117 | 0        | 0.005862 | 0.029267 | 0.067068 | 0.002681 | 0.000796 | 0.000402 | 0.000373 |
| 0        | 0        | 0        | 0        | 0        | 0.000421 | 0        | 0        | 0        | 0.000375 | 0        | 0        | 0        | 0        | 0        |
| 0        | 0.000812 | 0        | 0        | 0.000284 | 0.002142 | 0        | 0.001264 | 0.000177 | 0.000421 | 0.000354 | 0.001821 | 0        | 0        | 0        |
| 0        | 0.149808 | 0.000655 | 0.005455 | 0.026229 | 0.156614 | 0.20327  | 0.061393 | 0.057731 | 0.036977 | 0.021994 | 0.039959 | 0.001015 | 0.10073  | 0.002475 |
| 0        | 0        | 0        | 0        | 0        | 0        | 0        | 0        | 0        | 0        | 0        | 0        | 0        | 0        | 0        |
| 0        | 0.001594 | 0        | 0.000589 | 0.000452 | 0        | 0        | 0        | 0.004026 | 0        | 0.001937 | 0        | 0.000292 | 0        | 0        |
| 0        | 0        | 0        | 0        | 0        | 0        | 0        | 0        | 9.00E-05 | 0        | 0        | 0        | 0.000875 | 0        | 0.00065  |
| 0        | 0        | 0        | 0        | 0        | 0.001641 | 0        | 0.001378 | 0        | 0.004052 | 0.001205 | 0        | 0.052078 | 0.00023  | 0.005092 |
| 0        | 0        | 0        | 0        | 0        | 0.000421 | 0        | 0        | 0        | 0.00021  | 0        | 0        | 0        | 0        | 0        |
| 0.009257 | 0.006134 | 0.005388 | 0.00493  | 0.023    | 0.002154 | 0.016632 | 0.001226 | 0.001726 | 0        | 0.240113 | 0        | 0.000102 | 0.001224 | 0        |
| 0.002724 | 0        | 0        | 0.041049 | 0        | 0        | 0        | 0        | 0.000477 | 0        | 0.004748 | 0        | 0        | 0        | 0        |
| 0        | 0        | 0        | 0        | 0        | 0        | 0        | 0        | 0        | 0        | 0        | 0        | 0        | 8.61E-05 | 0        |
| 0        | 0        | 0.000328 | 0        | 0        | 0.000409 | 0        | 0.001217 | 0.000103 | 0        | 0.00404  | 0        | 9.09E-05 | 0.013253 | 0        |
| 0        | 0        | 0.000263 | 0        | 0        | 0        | 0        | 0        | 0        | 0        | 0.005811 | 0        | 0.000303 | 0.000665 | 0.003162 |
| 0        | 0        | 0        | 0        | 0        | 0.000792 | 0.007738 | 0        | 0        | 0.006548 | 0.070895 | 0.015846 | 8.33E-05 | 0.009652 | 0.038914 |
| 0        | 0        | 0        | 0.000226 | 0        | 0        | 0        | 0        | 0        | 0.000476 | 0        | 0.000951 | 0.000458 | 0.021197 | 0.001662 |
| 0        | 0.003815 | 0.003143 | 0.00039  | 0.003927 | 0        | 0.002725 | 0        | 0.00027  | 0.004289 | 0.081951 | 0        | 0.000788 | 0.163452 | 0.003201 |

|          |          |          |          |          |          |          |          |          |          |          |          |          |          |          |
|----------|----------|----------|----------|----------|----------|----------|----------|----------|----------|----------|----------|----------|----------|----------|
| 0        | 0        | 0        | 0        | 0        | 0        | 0        | 0        | 8.00E-05 | 0.003402 | 0        | 0        | 0.000496 | 0.000129 | 0.024077 |
| 0.00064  | 0        | 0.000318 | 0        | 0        | 0.008321 | 0.008087 | 0.001226 | 0.00102  | 0.001226 | 0.276589 | 0        | 0        | 0.002014 | 0.001729 |
| 0.001385 | 0        | 0        | 0.000368 | 0.00023  | 0.018901 | 0.00545  | 0.002481 | 0.004486 | 0.011076 | 0.059816 | 0.001872 | 0        | 0.00858  | 0.002561 |
| 0.001338 | 0.001544 | 0        | 0.000224 | 0        | 0.004569 | 0        | 0.001188 | 0        | 0.000192 | 0        | 0        | 0.000114 | 0        | 0.000573 |
| 0        | 0        | 0        | 0        | 0        | 0        | 0        | 0        | 0        | 0        | 0        | 0        | 0        | 0        | 0        |
| 0        | 0.000751 | 0        | 0        | 0        | 0.000848 | 0        | 0        | 0        | 0        | 0        | 0        | 0.000261 | 0        | 0        |
| 0        | 0.00224  | 0        | 0        | 0        | 0.002068 | 0        | 0        | 0        | 0        | 0        | 0        | 0        | 0        | 0        |
| 0        | 0        | 0        | 0        | 0        | 0.002582 | 0        | 0        | 0        | 0        | 0        | 0        | 0        | 0        | 0        |
| 0        | 0        | 0        | 0        | 0        | 0        | 0        | 0        | 1.00E-04 | 0        | 0        | 0        | 9.85E-05 | 0.004281 | 0.000258 |
| 0.000666 | 0.023848 | 0.000561 | 0.00039  | 0.000475 | 0.091943 | 0.005319 | 0.003774 | 0.002456 | 0.003082 | 0.006119 | 0.00089  | 0.011373 | 0.299393 | 0.004185 |
| 0        | 0.002313 | 0        | 0        | 0        | 0.008488 | 0        | 0        | 0.000163 | 0.001088 | 0        | 0.001032 | 0.001879 | 0.032284 | 0.001022 |
| 0        | 0        | 0        | 0        | 0.000805 | 0        | 0        | 0        | 0        | 0        | 0        | 0        | 0        | 0        | 0        |
| 0        | 0.000781 | 0        | 0.000398 | 0.000284 | 0        | 0        | 0        | 0        | 0        | 0        | 0        | 0        | 0        | 0        |
| 0        | 0.007617 | 0.000283 | 0.000209 | 0.014027 | 0.016722 | 0.011204 | 0        | 0.001453 | 0.000357 | 0        | 0.000941 | 0.001421 | 0.009436 | 0        |
| 0.000724 | 0.034173 | 0.000323 | 0.002673 | 0.064575 | 0.046866 | 0.019008 | 0.002481 | 0.008089 | 0.001244 | 0.000331 | 0        | 0.006853 | 0.043753 | 0.00214  |
| 0        | 0        | 0        | 0        | 0.000468 | 0        | 0        | 0        | 0.000117 | 0        | 0        | 0        | 0.000133 | 0        | 0        |
| 0        | 0.000781 | 0.000333 | 0        | 0.000491 | 0.002996 | 0        | 0.001207 | 6.33E-05 | 0.000375 | 0        | 0        | 0        | 0        | 0        |
| 0        | 0        | 0        | 0        | 0        | 0.001331 | 0        | 0        | 0        | 0        | 0        | 0        | 0        | 0        | 0        |
| 0        | 0.000757 | 0        | 0        | 0        | 0.000823 | 0.002812 | 0.001198 | 0        | 0        | 0        | 0        | 0        | 0        | 0        |
| 0.005962 | 0.059965 | 0        | 0.000604 | 0.017938 | 0.022833 | 0.223259 | 0.23002  | 0        | 0.003357 | 0        | 0        | 0        | 0        | 0        |
| 0        | 0.014434 | 0        | 0        | 0.014472 | 0.002161 | 0.002594 | 0        | 0        | 0        | 0        | 0        | 0        | 0        | 0        |
| 0        | 0.00539  | 0        | 0        | 0.006488 | 0.006086 | 0.016087 | 0        | 0        | 0        | 0        | 0        | 0        | 0        | 0        |
| 0        | 0        | 0.000293 | 0        | 0.000268 | 0.006439 | 0        | 0.0025   | 0        | 0.008277 | 0.000331 | 0.006486 | 0        | 0        | 0.004443 |
| 0        | 0        | 0        | 0        | 0        | 0.002    | 0        | 0        | 0        | 0        | 0        | 0        | 0        | 0        | 0.00022  |
| 0.000656 | 0.001532 | 0        | 0        | 0        | 0.008927 | 0.002725 | 0.00251  | 0        | 0.000494 | 0.004536 | 0.015512 | 0.000261 | 0        | 0.001634 |
| 0.001375 | 0.000775 | 0.000343 | 0.000582 | 0.000537 | 0.005089 | 0.007978 | 0        | 0.000247 | 0        | 0        | 0        | 0        | 0        | 0.000631 |
| 0        | 0.001643 | 0        | 0.000557 | 0.00023  | 0.010054 | 0.011117 | 0.006065 | 0.000277 | 0.001646 | 0        | 0.027432 | 0        | 0        | 0        |
| 0        | 0.005433 | 0.000283 | 0        | 0.000176 | 0.000805 | 0.002965 | 0        | 0.0006   | 0.000594 | 0        | 0        | 0        | 0        | 0        |
| 0        | 0.00152  | 0        | 0        | 0        | 0        | 0        | 0        | 0.00035  | 0.000357 | 0        | 0.001973 | 0        | 0        | 0        |
| 0        | 0.000763 | 0        | 0        | 0        | 0.00265  | 0        | 0.002348 | 0.004266 | 0.004152 | 0.001252 | 0        | 0.00025  | 0.000172 | 0.000334 |
| 0        | 0.001446 | 0        | 0        | 0.000506 | 0.001647 | 0        | 0        | 0.012148 | 0.003091 | 0.000472 | 0.002014 | 0        | 0.000206 | 0        |
| 0        | 0        | 0        | 0        | 0        | 0.000483 | 0.002725 | 0.004829 | 0        | 0        | 0        | 0        | 0        | 0        | 0        |
| 0        | 0        | 0        | 0        | 0        | 0.002873 | 0        | 0.001093 | 0        | 0        | 0.000354 | 0        | 0.000155 | 0        | 0        |
| 0        | 0        | 0.000338 | 0        | 0        | 0.00421  | 0        | 0        | 0.006206 | 0.007344 | 0.000354 | 0        | 0.009884 | 0        | 0        |

| CP65     | CP64     | CP63     | CP62     | CP61     | CP60     | CP59     | CP58     | CP38     | CP37     | CP41     | CP35     | CP16     | CP15     | CP36     |          |
|----------|----------|----------|----------|----------|----------|----------|----------|----------|----------|----------|----------|----------|----------|----------|----------|
|          | 0        | 0.000384 | 0        | 0        | 0        | 0.013427 | 0        | 0        | 0.003389 | 0.00166  | 0        | 0        | 0.002914 | 0        | 0        |
|          | 0        | 0.000185 | 0        | 0        | 0        | 0.00152  | 0        | 0        | 0.001269 | 0        | 0.005786 | 6.27E-05 | 0.001269 | 0        | 0.001579 |
| 0.001258 | 0.009092 | 0.000336 | 0.021902 | 9.61E-05 | 0.022826 | 0.001146 | 0.004047 | 0.001545 | 0.001456 | 0.011649 | 0.006191 | 0.008472 | 0.00694  | 0.006868 |          |
|          | 0        | 0.000675 | 0        | 0.001276 | 0        | 0.098016 | 0        | 0        | 0.002264 | 0.002388 | 0.011881 | 0.001445 | 0.013251 | 0.020579 | 0.005295 |
| 0.001345 | 0.000415 | 0        | 0.003971 | 0.000166 | 0.336458 | 0.000255 | 0        | 0.006848 | 0.007383 | 0.217405 | 0.001522 | 0.08468  | 0.040347 | 0.02189  |          |
| 0.002603 | 0        | 0.000264 | 0.004159 | 9.34E-05 | 0        | 0.000467 | 0.003704 | 0        | 0        | 0.012344 | 0        | 0.018482 | 0.00985  | 0.007033 |          |
|          | 0        | 0.000296 | 0        | 0        | 9.08E-05 | 0.007448 | 0.000204 | 0        | 0        | 0.011572 | 0        | 0.004875 | 0.000962 | 0.004886 |          |
|          | 0.0036   | 0.000428 | 0        | 0.003304 | 7.74E-05 | 0.061358 | 0.00118  | 0.002058 | 0.031077 | 0.003131 | 0.085789 | 0.005714 | 0.039195 | 0.046339 | 0.031847 |
| 0.007418 | 0.020173 | 0.003635 | 0.015618 | 0.010262 | 0.025739 | 0.014189 | 0.01394  | 0        | 0        | 0.045209 | 8.36E-05 | 0.02631  | 0.034309 | 0.020383 |          |
| 0.010931 | 0.055363 | 0.014894 | 0.041957 | 0.005604 | 0        | 0.016948 | 0.007664 | 0.000817 | 0.014635 | 0        | 0.000136 | 0.022252 | 0.067317 | 0.016232 |          |
|          | 0        | 0.011368 | 0        | 0.000875 | 0.003636 | 0        | 0.000408 | 0        | 0        | 0        | 0        | 0.001529 | 0        | 0.000462 |          |
|          | 0        | 0        | 0        | 0.00035  | 0.001439 | 0        | 0.000526 | 0        | 0        | 0        | 0        | 0.001462 | 0        | 0.000617 |          |
|          | 0        | 0.003234 | 0.000275 | 0.000641 | 0.017246 | 0        | 0.009968 | 0        | 0        | 0        | 0        | 0.000673 | 0        | 0.002733 |          |
|          | 0        | 0.002272 | 0.000272 | 0.006407 | 0.000545 | 0        | 0.001359 | 0.001989 | 0        | 0        | 0        | 0.009318 | 0.003083 | 0.006086 |          |
| 0.005379 | 0.038234 | 0.003729 | 0.038841 | 0.049301 | 0.00152  | 0.020625 | 0.020661 | 0        | 0.000641 | 0        | 8.01E-05 | 0.01554  | 0.022173 | 0.025678 |          |
|          | 0        | 0        | 0        | 0        | 0        | 0        | 0        | 0        | 0        | 0        | 0        | 0        | 0        | 0        | 0        |
|          | 0        | 0        | 7.98E-05 | 0        | 0.000238 | 0        | 0        | 0        | 0        | 0        | 0        | 0        | 0        | 0        | 0        |
| 0.008242 | 0.101978 | 0.000209 | 0.021539 | 0.003839 | 0        | 0.005383 | 0.007613 | 0.042701 | 0        | 0        | 8.70E-05 | 0.007077 | 0.007188 | 0.003894 |          |
|          | 0        | 0.009568 | 0        | 0.011835 | 7.74E-05 | 0        | 0        | 0        | 0        | 0        | 0        | 0.000644 | 0        | 0        | 0        |
|          | 0        | 0.039469 | 0        | 0.075072 | 7.21E-05 | 0        | 0        | 0.00192  | 0        | 0        | 0        | 0        | 0        | 0        | 0        |
|          | 0        | 0.011214 | 0.001481 | 0.005241 | 0.009998 | 0.008081 | 0.014596 | 0.00751  | 0        | 0.381579 | 0        | 0.000296 | 0.004904 | 0.009128 | 0.01058  |
|          | 0        | 0        | 0        | 0.000933 | 5.34E-05 | 0        | 0.000212 | 0        | 0.000739 | 0        | 0        | 0        | 0        | 0        | 0        |
| 0.005552 | 0        | 0.000476 | 0.000389 | 8.54E-05 | 0.001672 | 0.000323 | 0.001972 | 0.000256 | 0.007631 | 0        | 0.024235 | 0        | 0        | 0.000903 |          |
| 0.001215 | 0.008924 | 0.000468 | 0.003407 | 0.000267 | 0.019836 | 0.023936 | 0.00192  | 0.014277 | 0        | 0        | 0.009304 | 0.014953 | 0.007857 | 0.006855 |          |
| 0.008849 | 0.001465 | 0.000449 | 0.008635 | 8.01E-05 | 0.032098 | 0.008228 | 0.006104 | 0.1741   | 0.004675 | 0        | 0.001003 | 0.031829 | 0        | 0.001131 |          |
|          | 0        | 0.000776 | 0.000226 | 0.001315 | 0.000264 | 0.01667  | 0.002811 | 0        | 0.007433 | 0.00198  | 0        | 6.96E-05 | 0.018146 | 0.00597  | 0.011774 |
|          | 0        | 0        | 0        | 0        | 0        | 0        | 0.000161 | 0        | 0.001206 | 0        | 0        | 0.00085  | 0.00226  | 0        | 0.00392  |
| 0.001084 | 0.00075  | 0        | 0.000972 | 0.00024  | 0.002989 | 0.013942 | 0.001989 | 0.035191 | 0        | 0.030628 | 0.020916 | 0.002202 | 0.003128 | 0.04311  |          |
|          | 0        | 0.001901 | 0.001076 | 0.006523 | 0        | 0.005877 | 0.02808  | 0.001835 | 0.060984 | 0.003976 | 0.046135 | 0.003642 | 0.033906 | 0.004015 | 0.021768 |
| 0.014705 | 0.01233  | 0.007067 | 0.049996 | 0.001855 | 0.023586 | 0.201892 | 0.01953  | 0.232473 | 0.003102 | 0.42748  | 0.11923  | 0.190005 | 0.051189 | 0.667582 |          |
| 0.001995 | 0.001209 | 0.000212 | 0.005318 | 0        | 0.010818 | 0.010996 | 0        | 0.072937 | 0        | 0        | 0.000776 | 0.043215 | 0.03773  | 0.003393 |          |
| 0.001301 | 0.001341 | 0.000311 | 0.002462 | 7.21E-05 | 0.003243 | 0.011488 | 0        | 0.006178 | 0        | 0.006558 | 0.002702 | 0.013588 | 0.015331 | 0.031184 |          |
|          | 0        | 0.000419 | 0.000184 | 0.000317 | 0        | 0.046411 | 0.000255 | 0.001766 | 0        | 0.005009 | 0        | 0        | 0.006462 | 0.000977 | 0.000673 |
|          | 0        | 0.001403 | 0.000374 | 0.001205 | 0.000115 | 0.045271 | 0        | 0        | 0.006042 | 0.014562 | 0        | 0.000707 | 0.014328 | 0.008782 | 0.005246 |
|          | 0        | 0.000309 | 0        | 0.000246 | 0        | 0.002939 | 0.000323 | 0        | 0        | 0        | 0        | 0        | 0        | 0        | 0        |
| 0.001475 | 0.005302 | 8.53E-05 | 0.013539 | 0.000398 | 0.071365 | 0.003388 | 0        | 0        | 0.001078 | 0.006018 | 0        | 0.00201  | 0.002015 | 0        | 0        |
|          | 0        | 0.009586 | 0.000413 | 0.018294 | 0.000822 | 0.105388 | 0.005214 | 0        | 0        | 0.016208 | 0.011495 | 0.000679 | 0.003019 | 0        | 0        |
| 0.001301 | 0.000274 | 0.000118 | 0.000382 | 8.54E-05 | 0        | 0.000238 | 0        | 0        | 0.004019 | 0        | 0        | 0        | 0.000947 | 0.000524 |          |
| 0.001041 | 0        | 0.000416 | 0.000408 | 7.48E-05 | 0        | 0        | 0        | 0        | 0.004762 | 0        | 0        | 0.002356 | 0.000895 | 0.001184 |          |
| 0.011408 | 0.003366 | 0.010617 | 0.010125 | 0.009603 | 0        | 0.005001 | 0.009636 | 0        | 0        | 0        | 0        | 0.003116 | 0.003978 | 0.000969 |          |
|          | 0        | 0.000115 | 0.000198 | 0.000589 | 0.000518 | 0        | 0        | 0        | 0        | 0        | 0        | 0        | 0        | 0        | 0.000168 |
| 0.009717 | 0.000185 | 0.002936 | 0.000667 | 0.00075  | 0        | 0.000221 | 0.009928 | 0        | 0        | 0        | 0        | 0.002096 | 0.000955 | 0.000171 |          |
| 0.469397 | 0.340189 | 0.841667 | 0.229208 | 0.350902 | 0.00456  | 0.234149 | 0.534944 | 0.000266 | 0        | 0        | 0.001121 | 0.190486 | 0.489823 | 0.01641  |          |
|          | 0        | 0.000163 | 0        | 0.000311 | 0        | 0        | 0        | 0        | 0        | 0        | 0        | 0        | 0        | 0        | 0        |
| 0.001128 | 0.001451 | 0.008842 | 0.001205 | 0.005203 | 0        | 0.001172 | 0        | 0        | 0        | 0        | 6.62E-05 | 0        | 0        | 0        | 0        |
| 0.001345 | 0        | 0.000198 | 0.000512 | 0.001041 | 0        | 0.00056  | 0        | 0        | 0        | 0        | 6.62E-05 | 0        | 0        | 0        | 0        |
|          | 0        | 0.002391 | 0.00385  | 0.002766 | 0.011626 | 0.001267 | 0.005808 | 0        | 0        | 0        | 0        | 0.002116 | 0.001165 | 0        | 0        |
|          | 0        | 0        | 0        | 0        | 0        | 0        | 0        | 0        | 0        | 0        | 0        | 0.000712 | 0        | 0        | 0        |
| 0.002689 | 0.000834 | 0.00038  | 0        | 0.001324 | 0        | 0.000722 | 0        | 0        | 0        | 0        | 0        | 0.001414 | 0.000993 | 0.002648 |          |
|          | 0        | 0.000106 | 7.71E-05 | 0.000777 | 0.000392 | 0        | 0.00045  | 0        | 0        | 0        | 0        | 0.006952 | 0        | 0.000363 |          |
|          | 0        | 0        | 0        | 0        | 0        | 0        | 0        | 0        | 0        | 0        | 0        | 0        | 0        | 0        | 0        |
|          | 0        | 0.000719 | 0.000113 | 0.0048   | 0.001631 | 0        | 0.009417 | 0        | 0.001675 | 0        | 0.006866 | 0.000198 | 0        | 0        | 0.002822 |
|          | 0        | 0        | 0.000292 | 0        | 0        | 0        | 0.000756 | 0        | 0        | 0        | 0        | 0        | 0        | 0        | 0        |
| 0.001995 | 0.003361 | 0.011209 | 0.005267 | 0.017    | 0        | 0.00529  | 0        | 0        | 0        | 0        | 0        | 0.003414 | 0.008023 | 0.000178 |          |
| 0.001171 | 0.004354 | 0.008666 | 0.000337 | 0.004263 | 0        | 0        | 0        | 0        | 0        | 0.007329 | 0.000881 | 0        | 0.001015 | 0        | 0        |
| 0.019911 | 0.009449 | 0.000151 | 0.00239  | 0.001928 | 0.009982 | 0.007761 | 0        | 0.007538 | 0.050124 | 0.006712 | 0.19261  | 0.000702 | 0.003158 | 0.002367 |          |

|          |          |          |          |          |          |          |          |          |          |          |          |          |          |          |
|----------|----------|----------|----------|----------|----------|----------|----------|----------|----------|----------|----------|----------|----------|----------|
| 0        | 0        | 0        | 0.000382 | 0.008239 | 0        | 0.000297 | 0        | 0        | 0        | 0        | 0        | 0        | 0        | 0        |
| 0.018176 | 0.022891 | 0        | 0.0009   | 0.000139 | 0.001444 | 0.000492 | 0        | 0        | 0        | 0        | 4.87E-05 | 0.009068 | 0.001015 | 0.000376 |
| 0.010628 | 0.011139 | 0.00011  | 0.002235 | 0.000264 | 0.001545 | 0.007251 | 0.004064 | 0        | 0        | 0        | 7.31E-05 | 0.009443 | 0.010925 | 0.00028  |
| 0        | 0.000582 | 0        | 0.000978 | 0.000163 | 0        | 0.001384 | 0.001869 | 0.007212 | 0        | 0        | 0.000992 | 0.001308 | 0        | 0.000148 |
| 0        | 0.000141 | 0        | 0.000751 | 0.000323 | 0        | 0.002012 | 0        | 0.003266 | 0        | 0        | 0.000136 | 0        | 0        | 0        |
| 0        | 0.000869 | 0        | 0.000777 | 4.81E-05 | 0        | 0.000807 | 0        | 0.003511 | 0        | 0        | 0.000435 | 0        | 0        | 0        |
| 0        | 0.000128 | 0        | 0        | 0.001071 | 0        | 0        | 0.009602 | 0        | 0        | 0        | 0        | 0        | 0        | 0        |
| 0.001431 | 0.000282 | 0        | 0        | 0.000985 | 0        | 0.000696 | 0.003806 | 0        | 0        | 0        | 0        | 0        | 0.000962 | 0        |
| 0.000954 | 0.001518 | 0        | 0.001211 | 0.002611 | 0        | 0.000934 | 0        | 0.002299 | 0        | 0        | 0.005815 | 0        | 0        | 0        |
| 0.009066 | 0.1759   | 0.003324 | 0.286893 | 0.324998 | 0        | 0.207598 | 0.098368 | 0.250321 | 0        | 0.012575 | 0.558114 | 0.006933 | 0.002038 | 0.000488 |
| 0.001475 | 0.020619 | 0.00019  | 0.021753 | 0.045125 | 0        | 0.007464 | 0.011625 | 0.021696 | 0        | 0.005478 | 0.038817 | 0.001519 | 0        | 0        |
| 0        | 0.000159 | 9.08E-05 | 0        | 0.000206 | 0        | 0        | 0        | 0        | 0        | 0        | 0        | 0        | 0        | 0.000307 |
| 0        | 0.00019  | 0.000325 | 0        | 0.000753 | 0        | 0        | 0.009636 | 0        | 0        | 0        | 0        | 0        | 0        | 0.000181 |
| 0.010237 | 0.005069 | 0.009453 | 0.007314 | 0.0087   | 0.001647 | 0.003931 | 0.019427 | 0        | 0.073846 | 0        | 8.01E-05 | 0        | 0.000985 | 0.000531 |
| 0.062031 | 0.021236 | 0.051517 | 0.026559 | 0.044218 | 0.002913 | 0.024157 | 0.033727 | 0        | 0.376336 | 0        | 0.000658 | 0.003895 | 0.006917 | 0.002559 |
| 0        | 0.000322 | 0        | 0        | 7.48E-05 | 0        | 0.000272 | 0        | 0        | 0.008708 | 0        | 0        | 0        | 0        | 0        |
| 0        | 0        | 7.98E-05 | 0        | 0        | 0        | 0        | 0.003738 | 0        | 0.010674 | 0        | 0        | 0        | 0        | 0.000162 |
| 0        | 0        | 0.000107 | 0        | 0        | 0        | 0.000263 | 0        | 0        | 0        | 0        | 0        | 0        | 0        | 0        |
| 0.002559 | 0.000132 | 0.001321 | 0.000285 | 0.00078  | 0        | 0.003099 | 0.001715 | 0        | 0        | 0        | 0        | 0.001481 | 0        | 0        |
| 0.087537 | 0.000957 | 7.71E-05 | 0.00982  | 0.005112 | 0.004383 | 0.046684 | 0.112753 | 0.000491 | 0        | 0        | 0        | 0.080045 | 0.014083 | 0        |
| 0.166573 | 0.000454 | 0.001409 | 0        | 0.000342 | 0        | 0.007362 | 0        | 0        | 0        | 0        | 0        | 0        | 0        | 0        |
| 0.013708 | 0.000516 | 0.001208 | 0.001101 | 0.001725 | 0        | 0.005163 | 0.011505 | 0        | 0        | 0        | 0        | 0        | 0        | 0        |
| 0        | 0.001443 | 0        | 0.000829 | 0        | 0.001419 | 0        | 0        | 0        | 0        | 0.018516 | 0        | 0.002173 | 0.003993 | 0.001345 |
| 0        | 0        | 0        | 0        | 0        | 0        | 0.000255 | 0        | 0        | 0        | 0.006095 | 0        | 0        | 0        | 0        |
| 0        | 0.000291 | 0        | 0.002967 | 0.000646 | 0        | 0.002216 | 0        | 0        | 0        | 0.00648  | 0        | 0.000789 | 0        | 0.000119 |
| 0.001388 | 0.001085 | 0.000102 | 0.000304 | 0.000769 | 0        | 0.001401 | 0.005898 | 0        | 0.000437 | 0        | 0        | 0.003548 | 0.023031 | 0.001105 |
| 0.008849 | 0.001222 | 0.001373 | 0.000654 | 0.000465 | 0.00152  | 0        | 0.002023 | 0        | 0        | 0        | 0        | 0.008116 | 0.017895 | 0.000353 |
| 0.005639 | 0.001553 | 0.002471 | 0.001451 | 0.001316 | 0        | 0.001197 | 0.005915 | 0        | 0        | 0        | 0        | 0.004318 | 0        | 0        |
| 0        | 0.000326 | 0        | 0.000292 | 8.01E-05 | 0.003167 | 0        | 0        | 0        | 0        | 0        | 0        | 0.001404 | 0        | 0        |
| 0        | 0.011734 | 0.000515 | 0.001723 | 0.008022 | 0.001596 | 0.002012 | 0.001817 | 0        | 0        | 0        | 0.000157 | 0.013059 | 0        | 0        |
| 0.001692 | 0.001751 | 7.98E-05 | 0.000304 | 0.001946 | 0        | 0.001299 | 0        | 0        | 0        | 0        | 0        | 0.000769 | 0.000993 | 0.000145 |
| 0        | 0.000146 | 0        | 0.003245 | 0.006052 | 0        | 0.000543 | 0        | 0        | 0        | 0        | 0        | 0        | 0        | 0        |
| 0        | 0        | 0        | 0        | 0.0074   | 0        | 0        | 0.001783 | 0        | 0        | 0        | 0        | 0        | 0.001    | 0        |
| 0        | 0.000326 | 0        | 0.000985 | 0.014053 | 0        | 0.001163 | 0        | 0        | 0        | 0        | 0        | 0        | 0        | 0.000498 |

| CP13     | CP12     | CP11     | CP10     | CP09     | CP08     | CP07     | CP06     | CP05     | CP04     | CP03     | CP02     | CP17     | CP18     | CP14     |          |
|----------|----------|----------|----------|----------|----------|----------|----------|----------|----------|----------|----------|----------|----------|----------|----------|
|          | 0        | 0        | 0        | 0        | 0.002767 | 0        | 0.000428 | 0.000301 | 0        | 0        | 0.000699 | 0.001899 | 0        | 0        | 0.000158 |
|          | 0        | 0        | 0        | 0        | 0.00036  | 0        | 0.001256 | 0.000306 | 0        | 0        | 0.001805 | 0.00151  | 0        | 0        | 0.000371 |
|          | 0        | 0        | 0        | 0.00055  | 0.008842 | 0.000135 | 0        | 0.012627 | 0        | 0        | 0.102222 | 0.008513 | 0.000433 | 0        | 0.003226 |
| 0.000337 | 0        | 0        | 0        | 0        | 0.005781 | 0        | 0.001615 | 0.001045 | 0        | 0        | 0.023626 | 0.015561 | 0.001091 | 0        | 0.000602 |
|          | 0        | 0.000546 | 0        | 0        | 0.016849 | 0        | 0.013454 | 0.002133 | 0        | 0        | 0.049496 | 0.079132 | 0.005436 | 0        | 0.003628 |
| 0.004708 | 0.003566 | 0.002563 | 0.000523 | 0.009723 | 0.000104 | 0.020726 | 0.000981 | 0.001584 | 0        | 0.002159 | 0.003364 | 0.027838 | 0.001071 | 0.003338 |          |
| 0.002867 | 0.001122 | 0.000842 | 0        | 0.003582 | 0        | 0.000839 | 0.000262 | 0        | 0        | 0.001623 | 0.001854 | 0.002289 | 0        | 0.00049  |          |
| 0.038325 | 0.010657 | 0.01628  | 0.001675 | 0.01303  | 0.000101 | 0.033447 | 0.007861 | 0.004801 | 0        | 0.027071 | 0.056821 | 0.01347  | 0.004987 | 0.012824 |          |
| 0.000352 | 0.02343  | 0.007524 | 0.004882 | 0.002625 | 0        | 0.009169 | 0.010805 | 0.000629 | 0        | 0.000389 | 0.06483  | 0.031202 | 0.040246 | 0.002511 |          |
| 0.001936 | 0.004003 | 0.139799 | 0        | 0.017313 | 0.00022  | 0.000463 | 0.007861 | 0.003502 | 0.003723 | 0.008868 | 0.005309 | 0.007251 | 0.009817 | 0.05664  |          |
|          | 0        | 0.000665 | 0.00213  | 0        | 0.000891 | 0        | 0        | 0        | 0        | 0.003005 | 0        | 0.001174 | 0        | 0.000785 |          |
|          | 0        | 0.000616 | 0        | 0        | 0        | 4.67E-05 | 0        | 0        | 0        | 0        | 0        | 0        | 0.001657 | 0.000756 | 0.000158 |
| 0.000292 | 0.001798 | 0.002392 | 0.001718 | 0.001905 | 0.000109 | 0.002948 | 0.002818 | 0        | 0        | 0.001252 | 0.001671 | 0.000591 | 0.000788 | 0.001652 |          |
|          | 0        | 0.000665 | 0.000629 | 0        | 0.011078 | 0.00013  | 0        | 0.007317 | 0        | 0.003866 | 0.048926 | 0.029062 | 0.002248 | 0.000828 | 0.005562 |
| 0.009184 | 0.005731 | 0.030157 | 0.01145  | 0.012945 | 6.22E-05 | 0.000417 | 0.067495 | 0        | 0.006658 | 0.13722  | 0.068011 | 0.017965 | 0.021243 | 0.026792 |          |
|          | 0        | 0        | 0        | 0        | 0        | 0        | 0.000107 | 0        | 0        | 0        | 0        | 0        | 0        | 0        | 0        |
|          | 0        | 0        | 0        | 0        | 0        | 0        | 0        | 0        | 0        | 0        | 0        | 0        | 0        | 0        | 0        |
| 0.00553  | 0.006635 | 0.020711 | 0.013184 | 0.005506 | 0.000187 | 0        | 0.002638 | 0.003402 | 0.007016 | 0        | 0        | 0.003263 | 0.00458  | 0.043195 |          |
|          | 0        | 0        | 0        | 0        | 0        | 0        | 0        | 0        | 0        | 0        | 0        | 0        | 0.000533 | 0        | 0        |
|          | 0        | 0        | 0        | 0        | 0.000389 | 0        | 0        | 0        | 0        | 0        | 0        | 0.001785 | 0.002897 | 0        | 0        |
| 0.032558 | 0.00299  | 0.03696  | 0.00104  | 0.017446 | 4.15E-05 | 0.00129  | 0.002206 | 0        | 0.006514 | 0.009041 | 0        | 0.013045 | 0.150812 | 0.007585 |          |
|          | 0        | 0        | 0        | 0        | 0        | 0        | 0        | 0.000146 | 0        | 0        | 0        | 0        | 0        | 0.001367 | 0        |
| 0.000252 | 0        | 0.001147 | 0        | 0.023369 | 0.001898 | 0        | 0.021067 | 0.000775 | 0        | 0.022512 | 0        | 0.000541 | 0.001853 | 0        |          |
| 0.005981 | 0.003437 | 0.004644 | 0.00374  | 0.015608 | 0.666032 | 0.027812 | 0.004514 | 0.021229 | 0        | 0.066058 | 0.114419 | 0.002797 | 0.015816 | 0.001562 |          |
| 0.210272 | 0.00287  | 0.065518 | 0.002129 | 0.037792 | 0.036546 | 0.010474 | 0.008498 | 0.032368 | 0        | 0.007651 | 0.145152 | 0.042124 | 0.057166 | 0.010115 |          |
| 0.104282 | 0.007241 | 0.010984 | 0.00112  | 0.004956 | 0.004939 | 0.026189 | 0.007497 | 0.0056   | 0        | 0.00576  | 0.013547 | 0.011938 | 0.02378  | 0.006285 |          |
| 0.001896 | 0        | 0.002776 | 0        | 0.000294 | 5.44E-05 | 0.002086 | 0.001924 | 0.000185 | 0        | 0.000449 | 0        | 0.002289 | 0.002247 | 0.000275 |          |
| 0.023369 | 0.002503 | 0.007457 | 0.001083 | 0.019379 | 0.000703 | 0.005965 | 0.03349  | 0.005352 | 0.003937 | 0.017046 | 0.006613 | 0.012704 | 0.016999 | 0.00493  |          |
| 0.079681 | 0.003645 | 0.056103 | 0        | 0.069983 | 0.005639 | 0.005057 | 0.009557 | 0.022508 | 0        | 0.032848 | 0.043983 | 0.020945 | 0.040594 | 0.028855 |          |
| 0.370371 | 0.047515 | 0.174868 | 0.003895 | 0.355565 | 0.004037 | 0.068001 | 0.185698 | 0.013191 | 0.00408  | 0.230185 | 0.093618 | 0.188816 | 0.120226 | 0.120865 |          |
| 0.024636 | 0.00731  | 0.028228 | 0        | 0.015977 | 0.028169 | 0.005514 | 0.006846 | 0.003222 | 0.003365 | 0.003489 | 0.008467 | 0.038694 | 0.015041 | 0.006322 |          |
| 0.017111 | 0.002423 | 0.012723 | 0        | 0.014518 | 0.003606 | 0.002549 | 0.003173 | 0.00096  | 0        | 0.01063  | 0.003181 | 0.040084 | 0.0055   | 0.005985 |          |
| 0.012209 | 0.005353 | 0.006389 | 0.003223 | 0.000805 | 0        | 0.000853 | 0.00017  | 0.000807 | 0.013387 | 0.001304 | 0.01936  | 0.002131 | 0.001097 | 0.00073  |          |
| 0.003584 | 0.000665 | 0.003429 | 0.001051 | 0.006292 | 0        | 0.005908 | 0.002162 | 0.000158 | 0        | 0.005285 | 0.035012 | 0.000574 | 0.000322 | 0.000275 |          |
|          | 0        | 0.000516 | 0        | 0        | 0.0038   | 0        | 0        | 0        | 0        | 0.000164 | 0        | 0.000558 | 0.001492 | 0.000327 |          |
| 0.004169 | 0.000626 | 0.001318 | 0.002155 | 0.089751 | 0        | 0        | 0.00172  | 0.000353 | 0        | 0.003169 | 0        | 0.001374 | 0.011381 | 0.019193 |          |
| 0.004738 | 0.002414 | 0.003716 | 0.005282 | 0.104155 | 0.000218 | 0.011462 | 0.011612 | 0.002123 | 0        | 0.019697 | 0.001487 | 0.002756 | 0.014134 | 0.027607 |          |
|          | 0        | 0.007744 | 0        | 0.00126  | 0        | 0        | 0.000185 | 0.000829 | 0        | 0.000207 | 0        | 0.000524 | 0.002352 | 0.001033 |          |
| 0.000337 | 0.001887 | 0.013797 | 0        | 0        | 0        | 0        | 0.00017  | 0.001087 | 0        | 0.000147 | 0        | 0.003338 | 0.003699 | 0.000981 |          |
| 0.000292 | 0.002702 | 0.007609 | 0.003094 | 0        | 0        | 0.02293  | 0.001511 | 0.009153 | 0.018684 | 0.001218 | 0        | 0.00139  | 0.000375 | 0.012282 |          |
|          | 0        | 0        | 0.000153 | 0.001056 | 0        | 0        | 0.001667 | 0        | 0        | 0        | 0        | 0        | 0        | 0        | 0.000287 |
|          | 0        | 0.002453 | 0.001526 | 0.004786 | 0        | 0        | 0.034215 | 7.29E-05 | 0        | 0        | 0        | 0        | 0.003621 | 0        | 0.0013   |
| 0.020329 | 0.342362 | 0.099177 | 0.398816 | 0.015295 | 0.001009 | 0.595813 | 0.006151 | 0        | 0.022693 | 0.005095 | 0.023456 | 0.3528   | 0.030009 | 0.43777  |          |
|          | 0        | 0        | 0        | 0        | 0        | 0        | 0.000102 | 0        | 0        | 0        | 0        | 0        | 0        | 0.000729 | 0        |
|          | 0        | 0        | 0.000226 | 0        | 0        | 0        | 0        | 0.006928 | 0.000136 | 0        | 0        | 0        | 0        | 0        | 0.000557 |
|          | 0        | 0        | 0        | 0        | 0        | 0        | 0.001064 | 0.000702 | 0        | 0        | 0        | 0        | 0        | 0        | 0.009835 |
| 0.000342 | 0        | 0.000879 | 0.000608 | 0.000682 | 0.000251 | 0        | 0.016694 | 0.007513 | 0        | 0.001062 | 0        | 0.000516 | 0.000756 | 0.058869 |          |
|          | 0        | 0.001202 | 0.000525 | 0        | 0        | 0        | 0.000117 | 0.000168 | 0        | 0.000112 | 0        | 0.000475 | 0.000749 | 8.67E-05 |          |
| 0.000911 | 0.001182 | 0.000671 | 0        | 0.001696 | 0.14015  | 0.069849 | 0.005777 | 0.000344 | 0.836567 | 0.011536 | 0        | 0.001732 | 0.001202 | 0        |          |
|          | 0        | 0.000606 | 0.000189 | 0        | 0.006814 | 0        | 0.000402 | 0.029418 | 0        | 0        | 0.049695 | 0        | 0        | 0.002602 | 8.91E-05 |
|          | 0        | 0        | 0        | 0        | 0        | 0        | 0        | 0        | 0        | 0.001114 | 0        | 0        | 0        | 0        | 0        |
|          | 0        | 0.000626 | 0        | 0.000512 | 0        | 0.002455 | 0.00042  | 0.020236 | 0.000185 | 0        | 0        | 0.000483 | 0.010211 | 0.000436 |          |
|          | 0        | 0        | 0        | 0        | 0        | 0        | 0        | 0        | 0        | 0.001511 | 0        | 0        | 0        | 0        | 0.000362 |
| 0.000317 | 0.004986 | 0.002288 | 0.000486 | 0.001677 | 0.000171 | 0.000408 | 0.001613 | 0.001321 | 0.006443 | 0.00158  | 0.00698  | 0.00328  | 0.004304 | 0.006408 |          |
| 0.000302 | 0.000566 | 0        | 0        | 0        | 0.000122 | 0.000437 | 0.00017  | 0        | 0        | 0.002107 | 0        | 0        | 0        | 0        | 0.000686 |
| 0.001272 | 0.000685 | 0        | 0.001745 | 0.001801 | 0.000213 | 0        | 0.00275  | 0        | 0.003723 | 0.01809  | 0.003341 | 0.000991 | 0.000651 | 0.002209 |          |

|          |          |          |          |          |          |          |          |          |          |          |          |          |          |          |
|----------|----------|----------|----------|----------|----------|----------|----------|----------|----------|----------|----------|----------|----------|----------|
| 0        | 0        | 0        | 0        | 0        | 5.19E-05 | 0        | 0.00016  | 0        | 0        | 0.002047 | 0        | 0        | 0        | 0.001974 |
| 0        | 0        | 0.001031 | 0        | 0        | 0.000109 | 0        | 0        | 0        | 0.004152 | 0.003989 | 0        | 0        | 0.000361 | 0.001392 |
| 0        | 0.000636 | 0.000348 | 0        | 0.000294 | 0.000145 | 0.000411 | 0.000389 | 0.000312 | 0        | 0.048823 | 0.014302 | 0        | 0        | 0.001753 |
| 0        | 0.008641 | 0.003149 | 0.00215  | 0        | 0        | 0        | 9.23E-05 | 0.00698  | 0        | 0        | 0        | 0.002714 | 0.003213 | 0.000292 |
| 0        | 0.001728 | 0.003673 | 0        | 0        | 0        | 0        | 0        | 0.002184 | 0        | 0        | 0        | 0        | 0.00665  | 9.41E-05 |
| 0        | 0.001311 | 0.002282 | 0        | 0        | 0        | 0        | 7.77E-05 | 0.000865 | 0        | 0        | 0        | 0.000558 | 0.002865 | 0        |
| 0        | 0.001847 | 0.001465 | 0.015051 | 0        | 0        | 0        | 0.000287 | 0.011154 | 0        | 0        | 0        | 0.000499 | 0.001018 | 0        |
| 0        | 0.001291 | 0.001983 | 0.006968 | 0        | 0        | 0        | 0.000238 | 0.005593 | 0        | 0        | 0        | 0.000491 | 0.00157  | 0        |
| 0        | 0.001152 | 0.000732 | 0.002684 | 0        | 0        | 0        | 0.000311 | 0.007321 | 0        | 0.000147 | 0.002014 | 0        | 0.005644 | 0        |
| 0        | 0.265199 | 0.123616 | 0.293843 | 0.001061 | 0.000218 | 0.001282 | 0.022276 | 0.710657 | 0.010523 | 0.003713 | 0.007323 | 0.030977 | 0.219103 | 0.015271 |
| 0        | 0.026678 | 0.007731 | 0.026527 | 0.000313 | 0        | 0        | 0.001739 | 0.058486 | 0        | 0.000164 | 0        | 0.002614 | 0.024693 | 0.001181 |
| 0        | 0        | 0.000262 | 0        | 0        | 0        | 0        | 9.72E-05 | 0        | 0        | 0        | 0        | 0        | 0        | 0        |
| 0        | 0.000596 | 0.00025  | 0.003895 | 0        | 0        | 0.000891 | 0        | 0        | 0        | 0        | 0        | 0        | 0        | 0        |
| 0.000941 | 0.001192 | 0.004534 | 0.011636 | 0.006169 | 0.015302 | 0.00044  | 0.075429 | 0.003514 | 0        | 0.000492 | 0        | 0.001582 | 0.007326 | 0.00078  |
| 0.005496 | 0.005274 | 0.028826 | 0.050408 | 0.030543 | 0.081744 | 0.001259 | 0.352492 | 0.020308 | 0.007803 | 0.002098 | 0        | 0.001199 | 0.030232 | 0.002251 |
| 0.001673 | 0        | 0.001849 | 0.00103  | 0.000521 | 0.000754 | 0.000408 | 0.000413 | 0.001257 | 0        | 0        | 0        | 0.000533 | 0.001478 | 0        |
| 0.000252 | 0.001679 | 0.001403 | 0.00318  | 0.000597 | 0        | 0        | 0.001769 | 0.00067  | 0        | 0        | 0        | 0.000633 | 0.000329 | 0        |
| 0        | 0        | 0.001117 | 0.00048  | 0        | 0        | 0        | 0.000189 | 0.000344 | 0        | 0        | 0        | 0.000583 | 0        | 8.91E-05 |
| 0        | 0.004152 | 0.000391 | 0.000528 | 0        | 0        | 0        | 0        | 0        | 0        | 0        | 0        | 0        | 0        | 0        |
| 0.00151  | 0.138017 | 0.015054 | 0.045532 | 0.01086  | 0.003884 | 0        | 0.00482  | 0.014203 | 0.003937 | 0        | 0        | 0.01824  | 0.010815 | 0.012321 |
| 0        | 0.005026 | 0.003411 | 0.02952  | 0.013201 | 5.44E-05 | 0        | 0.012122 | 0.006395 | 0        | 0        | 0        | 0.002772 | 0.002655 | 0.000292 |
| 0        | 0.004698 | 0.004143 | 0.017516 | 0.010054 | 0.00015  | 0        | 0.00601  | 0.001257 | 0        | 0.000199 | 0        | 0.000991 | 0.003956 | 0        |
| 0.00098  | 0.001917 | 0.001568 | 0.001163 | 0.000265 | 0        | 0        | 0        | 0.000495 | 0.003436 | 0        | 0.001487 | 0.001673 | 0        | 0.000587 |
| 0        | 0.003774 | 0.000635 | 0.002118 | 0        | 0        | 0        | 0        | 0.00147  | 0        | 0        | 0        | 0.001698 | 0        | 0        |
| 0        | 0.001718 | 0.006328 | 0.002182 | 0        | 0        | 0        | 0        | 0.001111 | 0.029494 | 0        | 0.005744 | 0.001707 | 0        | 0.000183 |
| 0.000302 | 0.001967 | 0.002569 | 0.001163 | 0.001118 | 0        | 0.001227 | 0.001035 | 0.00066  | 0        | 0.001019 | 0.072496 | 0.003263 | 0.000302 | 0.002466 |
| 0.000693 | 0.007687 | 0.002313 | 0.004989 | 0.000654 | 0        | 0.00204  | 0        | 0        | 0        | 0        | 0.018902 | 0.005519 | 0        | 0.000191 |
| 0.005411 | 0.001261 | 0.005065 | 0.004892 | 0.001128 | 0        | 0.005431 | 0.000112 | 0        | 0        | 0        | 0.007964 | 0.007601 | 0.001814 | 0.000438 |
| 0        | 0        | 0        | 0.000603 | 0        | 0        | 0.000405 | 0        | 0.000127 | 0        | 0        | 0.011831 | 0.001682 | 0.001472 | 0        |
| 0        | 0.00436  | 0        | 0.001019 | 0        | 0.000197 | 0        | 0.000277 | 0        | 0        | 0        | 0        | 0.030094 | 0.008877 | 0.009419 |
| 0        | 0        | 0.000201 | 0.000528 | 0.00072  | 4.15E-05 | 0.001684 | 0        | 0        | 0        | 0        | 0        | 0.005944 | 0.002063 | 0.002991 |
| 0        | 0        | 0        | 0        | 0        | 0        | 0        | 7.77E-05 | 0        | 0        | 0        | 0        | 0.001066 | 0.00069  | 0.008216 |
| 0        | 0        | 0        | 0.000592 | 0        | 0        | 0        | 0.000335 | 0        | 0        | 0.00019  | 0        | 0.003846 | 0.027643 | 0.000466 |
| 0        | 0        | 0        | 0        | 0        | 0        | 0.00046  | 0.001458 | 0.000451 | 0        | 0        | 0        | 0.001665 | 0.01345  | 0.00132  |

| CP20     | CP34     | CP33     | CP19     | CP31     | CP30     | CP29     | CP28     | CP32     | CP26     | CP25     | CP24     | CP23     | CP22     | CP21     |
|----------|----------|----------|----------|----------|----------|----------|----------|----------|----------|----------|----------|----------|----------|----------|
| 0.000748 | 0        | 0.000316 | 0.001099 | 0        | 0        | 0        | 0        | 0        | 0        | 0.001977 | 0        | 0        | 0        | 0        |
| 0        | 0.007022 | 0.000952 | 0        | 0.001186 | 0        | 0        | 0.003287 | 0.003533 | 0.001078 | 0.001558 | 0.000137 | 0        | 0        | 0        |
| 0.018461 | 0.010753 | 0.001114 | 0.001086 | 0.011395 | 0.009237 | 0        | 0.037921 | 0.018227 | 0.013615 | 0.005635 | 0.00026  | 0        | 0        | 0.000646 |
| 0.004596 | 0.00583  | 0.002384 | 0        | 0.006342 | 0.000127 | 0.002198 | 0.071317 | 0.003686 | 0.004306 | 0.005483 | 0        | 0        | 0        | 0.000532 |
| 0.007284 | 0.023235 | 0.008186 | 0.001099 | 0.093411 | 0.000127 | 0.005433 | 0.290726 | 0.03392  | 0.005726 | 0.017676 | 9.80E-05 | 0        | 0.000214 | 0.000598 |
| 0.003176 | 0.000381 | 0.002445 | 0        | 0.046594 | 0        | 0        | 0.036196 | 0.018893 | 0.000975 | 0.003023 | 0.000377 | 0        | 0.000708 | 0.000532 |
| 0.000718 | 0.010002 | 0.002048 | 0        | 0.002475 | 0        | 0        | 0.001826 | 0        | 0.001814 | 0.012784 | 0.000113 | 0        | 0        | 0        |
| 0.008612 | 0.020422 | 0.044294 | 0.008802 | 0.038361 | 0.00012  | 0        | 0.067421 | 0.026368 | 0.013311 | 0.05657  | 0.002562 | 0        | 0.008202 | 0.001747 |
| 0.019102 | 0.015713 | 0.000932 | 0.002223 | 0.034185 | 0.052644 | 0        | 0.03575  | 0.048895 | 0.035409 | 0.024645 | 0.004575 | 0        | 0.010617 | 0.005487 |
| 0.026875 | 0        | 0.0024   | 0.00115  | 0.010295 | 0.070767 | 0.003329 | 0.00489  | 0.014771 | 0.043285 | 0.004545 | 0.010041 | 0.00204  | 0.003243 | 0.001832 |
| 0.001359 | 0        | 0        | 0        | 0        | 0.006268 | 0        | 0        | 0        | 0.001511 | 0.000541 | 0.000367 | 0        | 0.000214 | 0        |
| 0        | 0        | 0        | 0.001047 | 0.001117 | 0.00318  | 0        | 0        | 0        | 0.002834 | 0        | 0.00024  | 0        | 0.001496 | 0        |
| 0.009589 | 0        | 0        | 0.01255  | 0.002251 | 0.010919 | 0        | 0        | 0.003814 | 0.011723 | 0.001154 | 0.001788 | 0        | 0.0032   | 0.002364 |
| 0.013743 | 0        | 0.000117 | 0.001189 | 0.009264 | 0.010018 | 0        | 0        | 0.018765 | 0.03089  | 0.005599 | 0.001499 | 0        | 0.00022  | 0.00057  |
| 0.068088 | 0        | 0.00039  | 0.015561 | 0.023477 | 0.072125 | 0        | 0.004525 | 0.041471 | 0.078203 | 0.017863 | 0.014538 | 0        | 0.02453  | 0.006807 |
| 0        | 0        | 0        | 0        | 0        | 0        | 0        | 0        | 0        | 0        | 0        | 0        | 0        | 0        | 0        |
| 0        | 0        | 0        | 0        | 0        | 0        | 0        | 0        | 0        | 0.000755 | 0        | 0.000181 | 0        | 0        | 0        |
| 0.011544 | 0.002349 | 0.01548  | 0.001189 | 0.008782 | 0.12861  | 0.017411 | 0        | 0        | 0.027972 | 0.004199 | 0.009194 | 0.001055 | 0.005525 | 0.004918 |
| 0        | 0        | 0        | 0        | 0        | 0        | 0        | 0        | 0        | 0        | 0        | 0        | 0        | 0        | 0        |
| 0.007574 | 0        | 0        | 0        | 0        | 0        | 0        | 0        | 0        | 0        | 0        | 0        | 0        | 0        | 0.00168  |
| 0.00904  | 0        | 0.000388 | 0.002236 | 0.002441 | 0.028964 | 0        | 0.002962 | 0.003686 | 0.017979 | 0.005584 | 0.08562  | 0.434602 | 0.057842 | 0.000551 |
| 0        | 0        | 0        | 0        | 0        | 0.000176 | 0        | 0        | 0        | 0        | 0        | 0.003179 | 0.00197  | 0.000225 | 0        |
| 0        | 0        | 0        | 0.002456 | 0        | 0.116045 | 0        | 0        | 0.00361  | 0        | 0        | 0.006975 | 0.009147 | 0.000222 | 0        |
| 0        | 0.212515 | 0.051774 | 0.002223 | 0.001031 | 0.041085 | 0        | 0.038489 | 0.003686 | 0.005449 | 0.01132  | 0.028336 | 0        | 0.036204 | 0.004329 |
| 0.000473 | 0.005234 | 0.064553 | 0.01043  | 0.012168 | 0.000795 | 0        | 0.003287 | 0.022656 | 0.008373 | 0.067096 | 0.028238 | 0        | 0.031314 | 0.008734 |
| 0.002978 | 0.003588 | 0.006384 | 0.009034 | 0.012959 | 0.000394 | 0        | 0        | 0.015078 | 0.005726 | 0.030136 | 0.014214 | 0        | 0.012798 | 0.003427 |
| 0        | 0.000763 | 0.002631 | 0        | 0        | 0        | 0        | 0        | 0        | 0.000219 | 0.001147 | 0.001514 | 0        | 0.000667 | 0        |
| 0        | 0.039473 | 0.032272 | 0        | 0.005844 | 0.006972 | 0        | 0.004362 | 0.003661 | 0.002731 | 0.003939 | 0.023296 | 0        | 0.007324 | 0.001301 |
| 0.001832 | 0.020863 | 0.080992 | 0.003438 | 0.021123 | 0.003834 | 0        | 0.010104 | 0.007782 | 0.019186 | 0.047646 | 0.061614 | 0.002251 | 0.020694 | 0.007187 |
| 0.020599 | 0.551925 | 0.524284 | 0.019994 | 0.210298 | 0.045201 | 0        | 0.13882  | 0.127768 | 0.126065 | 0.36092  | 0.20996  | 0.007739 | 0.05967  | 0.03132  |
| 0.001267 | 0.011254 | 0.041565 | 0.00349  | 0.016431 | 0.00624  | 0        | 0.025504 | 0.015078 | 0.00051  | 0.011291 | 0.007935 | 0.001548 | 0.010438 | 0.004766 |
| 0        | 0.043562 | 0.06744  | 0.002365 | 0.003609 | 0.011165 | 0        | 0.006716 | 0.011417 | 0.005106 | 0.013968 | 0.013059 | 0        | 0.002287 | 0        |
| 0.00197  | 0.000691 | 0.000775 | 0.007793 | 0.004915 | 0.000696 | 0.000417 | 0.001562 | 0.019251 | 0.000278 | 0.025323 | 0.000671 | 0        | 0.000427 | 0.000494 |
| 0.00313  | 0.000775 | 0.001508 | 0        | 0.003764 | 0.000106 | 0.004099 | 0.040376 | 0        | 0.011581 | 0.002352 | 0.001288 | 0        | 0.000225 | 0        |
| 0.000626 | 0        | 0        | 0        | 0.002251 | 0        | 0        | 0        | 0        | 0.002899 | 0        | 0.000578 | 0.036446 | 0.001303 | 0        |
| 0.119806 | 0.000405 | 0        | 0        | 0.107573 | 0.013247 | 0        | 0        | 0.003686 | 0.155832 | 0.049774 | 0.002743 | 0        | 0.014782 | 0.001187 |
| 0.220067 | 0.000775 | 9.86E-05 | 0.002223 | 0.136361 | 0.031982 | 0.000247 | 0        | 0.00768  | 0.268515 | 0.064564 | 0.006906 | 0.324492 | 0.014877 | 0.001861 |
| 0        | 0        | 0        | 0.000982 | 0        | 0.000232 | 0.000427 | 0        | 0        | 0.001233 | 0        | 0.001773 | 0.002111 | 0.000448 | 0        |
| 0        | 0        | 9.64E-05 | 0.00327  | 0.001203 | 0.000746 | 0.000981 | 0        | 0.003814 | 0        | 0.002742 | 0.001695 | 0.009639 | 0.001115 | 0        |
| 0.00568  | 0.000381 | 0.000437 | 0.003503 | 0.003815 | 0.027388 | 0.000137 | 0.001725 | 0        | 0.00388  | 0        | 0.001611 | 0.011046 | 0.000511 | 0        |
| 0        | 0        | 0        | 0.001163 | 0        | 0        | 0        | 0        | 0        | 0        | 0        | 0        | 0        | 0        | 0.001377 |
| 0        | 0        | 0        | 0.003257 | 0.001289 | 0        | 0        | 0        | 0        | 0        | 0.000952 | 0        | 0        | 0.000465 | 0.002867 |
| 0.106583 | 0        | 0.0005   | 0.417949 | 0.030558 | 0.132113 | 0        | 0.070668 | 0.083506 | 0.004538 | 0.009761 | 0.031079 | 0.060156 | 0.170846 | 0.483049 |
| 0.001252 | 0        | 0        | 0        | 0        | 0        | 0        | 0        | 0        | 0        | 0        | 0        | 0        | 0        | 0        |
| 0.002642 | 0        | 0.00026  | 0        | 0        | 0.002526 | 0        | 0        | 0        | 0.00051  | 0        | 0.001102 | 0        | 0.000468 | 0        |
| 0        | 0        | 0        | 0        | 0        | 0.000113 | 0        | 0        | 0        | 0        | 0        | 0        | 0        | 0.000612 | 0        |
| 0.000565 | 0        | 0        | 0.002249 | 0.001066 | 0.001717 | 0        | 0.001501 | 0        | 0.000407 | 0        | 0.000612 | 0        | 0.001545 | 0.001215 |
| 0        | 0        | 0.000103 | 0.001124 | 0        | 0        | 0.000145 | 0        | 0        | 0        | 0.000577 | 0        | 0        | 0.000895 | 0        |
| 0.003543 | 0        | 0.000276 | 0        | 0.003592 | 0        | 0.000811 | 0.014507 | 0.015462 | 0        | 0        | 0        | 0.043974 | 0.000248 | 0        |
| 0.027562 | 0        | 0        | 0        | 0.00935  | 0        | 0        | 0        | 0        | 0.000239 | 0        | 0.000103 | 0        | 0.000165 | 0        |
| 0        | 0        | 0        | 0        | 0        | 0        | 0        | 0        | 0        | 0        | 0        | 0        | 0        | 0        | 0        |
| 0.001481 | 0        | 0        | 0.002352 | 0        | 0.000134 | 0.000272 | 0        | 0        | 0        | 0        | 0.00263  | 0        | 0.000505 | 0.002317 |
| 0        | 0.000715 | 0        | 0        | 0.0011   | 0        | 0        | 0        | 0        | 0        | 0        | 0        | 0        | 0        | 0        |
| 0.002352 | 0.002527 | 0.000408 | 0.001176 | 0.001203 | 0.001991 | 0.009708 | 0.001623 | 0        | 0.003628 | 0.000577 | 0.002023 | 0        | 0.019657 | 0.000598 |
| 0.000565 | 0.000381 | 0.000108 | 0        | 0.001169 | 0.000106 | 0.000546 | 0        | 0        | 0        | 0        | 0.000446 | 0        | 0        | 0        |
| 0.110324 | 0.000787 | 0        | 0.002236 | 0.012203 | 0.002976 | 0.000229 | 0.00631  | 0.022016 | 0.002608 | 0.001162 | 0.00024  | 0        | 0        | 0.001082 |

|          |          |          |          |          |          |          |          |          |          |          |          |          |          |          |
|----------|----------|----------|----------|----------|----------|----------|----------|----------|----------|----------|----------|----------|----------|----------|
| 0.013193 | 0.001288 | 0        | 0        | 0        | 0.001653 | 0        | 0.006574 | 0        | 0        | 0        | 0        | 0        | 0.00024  | 0        |
| 0.006856 | 0.001085 | 0        | 0.001073 | 0        | 0.00268  | 0        | 0        | 0.011673 | 0.001007 | 0        | 0.002978 | 0        | 0.00022  | 0.00056  |
| 0.045366 | 0.000346 | 9.41E-05 | 0        | 0        | 0.01782  | 0        | 0.001643 | 0.052198 | 0.007179 | 0.003196 | 0.001038 | 0.001618 | 0        | 0        |
| 0        | 0        | 0.003653 | 0.003645 | 0        | 0        | 0        | 0        | 0        | 0        | 0.002908 | 0.001905 | 0        | 0.005051 | 0.001206 |
| 0        | 0        | 0        | 0.00106  | 0        | 0        | 0.001525 | 0        | 0        | 0.000207 | 0        | 0.003664 | 0        | 0.003382 | 0.001718 |
| 0        | 0        | 0.00039  | 0        | 0.002355 | 0        | 0.000887 | 0        | 0        | 0.000174 | 0        | 0.001504 | 0        | 0.003775 | 0.001756 |
| 0.000458 | 0        | 0.000193 | 0.002339 | 0.001375 | 0        | 0.006292 | 0        | 0        | 0        | 0        | 0.000607 | 0        | 0.006894 | 0.005915 |
| 0        | 0        | 9.19E-05 | 0.002197 | 0        | 0        | 0.003169 | 0        | 0        | 0        | 0        | 0.002376 | 0        | 0.002986 | 0.005953 |
| 0        | 0        | 0        | 0        | 0        | 0.002118 | 0.007067 | 0        | 0        | 0        | 0        | 0.002077 | 0        | 0.004612 | 0.00056  |
| 0.011422 | 0.000346 | 0.009656 | 0.285862 | 0.009178 | 0.083845 | 0.820546 | 0.001745 | 0.040678 | 0.021452 | 0.008001 | 0.302462 | 0.031872 | 0.286784 | 0.213185 |
| 0.003039 | 0        | 0.000307 | 0.021635 | 0.001461 | 0.018052 | 0.106698 | 0        | 0.003866 | 0.004306 | 0.001133 | 0.016424 | 0        | 0.041922 | 0.015371 |
| 0        | 0        | 0.000114 | 0        | 0        | 0        | 0        | 0        | 0        | 0        | 0        | 0        | 0        | 0        | 0        |
| 0        | 0        | 0        | 0.001202 | 0        | 0        | 0        | 0        | 0        | 0        | 0        | 0        | 0        | 0.001389 | 0.003646 |
| 0.003207 | 0.00037  | 0.000847 | 0.004278 | 0        | 0        | 0.001187 | 0.001542 | 0.003994 | 0.002098 | 0.001097 | 0.008518 | 0.002111 | 0.004864 | 0.006304 |
| 0.009513 | 0.000322 | 0.004706 | 0.011438 | 0.009659 | 0.00031  | 0.00383  | 0.004768 | 0.015155 | 0.011278 | 0.002922 | 0.049369 | 0.005699 | 0.017814 | 0.019738 |
| 0        | 0        | 0.000307 | 0        | 0.001289 | 0        | 0.000152 | 0        | 0        | 0        | 0        | 0.001724 | 0        | 0.001669 | 0        |
| 0        | 0        | 0.00048  | 0.001163 | 0        | 0        | 0.001037 | 0        | 0        | 0        | 0.00062  | 0.000147 | 0        | 0.001057 | 0.001785 |
| 0        | 0        | 0.000531 | 0        | 0        | 0        | 0        | 0        | 0        | 0        | 0.001746 | 0        | 0        | 0        | 0        |
| 0        | 0        | 0        | 0        | 0        | 0        | 0        | 0        | 0        | 0        | 0        | 0        | 0        | 0.000243 | 0        |
| 0.004337 | 0        | 0.016479 | 0.082471 | 0.058538 | 0.000549 | 0        | 0.025524 | 0.240611 | 0.02519  | 0.076634 | 0.000916 | 0        | 0.014377 | 0.105297 |
| 0        | 0        | 0        | 0        | 0.001289 | 0        | 0        | 0        | 0        | 0.000445 | 0.000541 | 0.001607 | 0.0019   | 0.001834 | 0.001766 |
| 0        | 0        | 0.000699 | 0.010482 | 0        | 0        | 0.000269 | 0        | 0        | 0.001272 | 0.000519 | 0.001205 | 0.002251 | 0.002507 | 0.009152 |
| 0        | 0.00217  | 0.00225  | 0.001215 | 0.003661 | 0        | 0.000681 | 0        | 0.003635 | 0.000278 | 0.009841 | 0        | 0        | 0        | 0        |
| 0        | 0        | 0.000199 | 0.001099 | 0        | 0        | 0.000269 | 0.00142  | 0.007219 | 0        | 0.002128 | 0        | 0        | 0        | 0        |
| 0        | 0.001752 | 0.00071  | 0        | 0.001891 | 0        | 0        | 0.004809 | 0        | 0        | 0.006125 | 0.00048  | 0        | 0        | 0.000665 |
| 0.00452  | 0        | 0.000202 | 0.002236 | 0.006445 | 0.000274 | 0        | 0.001562 | 0.003814 | 0.002602 | 0.001768 | 0.000265 | 0        | 0.000918 | 0.001206 |
| 0.000473 | 0        | 7.39E-05 | 0.005609 | 0.003798 | 0        | 0        | 0.02315  | 0.014976 | 0        | 0.002814 | 0.000122 | 0        | 0.000266 | 0.002563 |
| 0.000733 | 0        | 0.00011  | 0.001021 | 0        | 0.000162 | 0        | 0        | 0        | 0        | 0.001053 | 0.001131 | 0        | 0.006224 | 0.009048 |
| 0.000519 | 0        | 0        | 0.00128  | 0        | 0        | 0        | 0        | 0        | 0.000213 | 0.002871 | 0.000132 | 0        | 0.000682 | 0        |
| 0.034769 | 0        | 0        | 0        | 0.001341 | 0.013592 | 0        | 0.00489  | 0        | 0.001188 | 0        | 0.004492 | 0.002955 | 0.00381  | 0.003465 |
| 0.011697 | 0        | 0        | 0        | 0        | 0.013831 | 0        | 0        | 0        | 0.000213 | 0        | 0.000622 | 0.003377 | 0.001155 | 0        |
| 0.002733 | 0        | 0        | 0        | 0.001272 | 0        | 0        | 0        | 0        | 0        | 0        | 0        | 0        | 0.023484 | 0.002962 |
| 0        | 0        | 0        | 0.004692 | 0        | 0.001076 | 0        | 0        | 0        | 0        | 0        | 0.003948 | 0        | 0.008156 | 0        |
| 0.001359 | 0        | 0        | 0.002068 | 0        | 0.002955 | 0        | 0        | 0        | 0        | 0        | 0.004879 | 0        | 0.026733 | 0.000807 |

| CP27     | CPR15    | CPR16    | CPR17    | CPR18    | CPR21    | CPR20    | CPR22    | CPR14    | CPR19    | CPR13    | CPR12    | CPR11    | CPR01    | CPR02    |
|----------|----------|----------|----------|----------|----------|----------|----------|----------|----------|----------|----------|----------|----------|----------|
| 0        | 0.000357 | 0.000892 | 0.000108 | 0        | 0        | 0        | 0        | 0        | 0        | 0        | 0.000728 | 0        | 0        | 0        |
| 0.000711 | 0        | 0        | 0        | 0        | 0        | 0        | 0        | 8.23E-05 | 0        | 0        | 8.31E-05 | 0        | 0        | 7.26E-05 |
| 0.000275 | 0.045125 | 0.147931 | 0.028216 | 0.000338 | 0.016566 | 0.001071 | 0        | 0.004529 | 0.00045  | 0        | 0.009338 | 0        | 0.068123 | 0.001258 |
| 0.00249  | 0.00384  | 0.019771 | 0.002315 | 0        | 0.002893 | 0        | 0        | 0.000385 | 7.83E-05 | 0        | 0.002219 | 0        | 0.007974 | 0.000609 |
| 0.011418 | 0.016142 | 0.049217 | 0.007495 | 0        | 0.007994 | 0        | 0        | 0.002965 | 0        | 0        | 0.005477 | 0        | 0.031806 | 0.001026 |
| 0.015318 | 0.000134 | 0.001802 | 0.000138 | 0        | 0        | 0        | 0        | 0.001743 | 0        | 0.000238 | 7.81E-05 | 0.000593 | 0.002848 | 0.000281 |
| 0.003219 | 0        | 0        | 0        | 0        | 0        | 0        | 0        | 0        | 0        | 0        | 0        | 0        | 0        | 0        |
| 0.046919 | 0.000575 | 0.00091  | 0.000394 | 0        | 0.000224 | 0        | 0.000384 | 0.001458 | 7.28E-05 | 6.14E-05 | 0.001897 | 0.000974 | 0.005331 | 0.000529 |
| 0.016275 | 0.035761 | 0.031143 | 0.016484 | 0.022743 | 0.024829 | 0.015476 | 0.075419 | 0.00926  | 0.015286 | 0.005467 | 0.00789  | 0.007182 | 0.122827 | 0.018216 |
| 0.001055 | 0.010211 | 0.041659 | 0.019561 | 0.008586 | 0.036858 | 0.007767 | 0.00952  | 0.005804 | 0.013571 | 0.002291 | 0.00259  | 0.008309 | 0.000478 | 0.022012 |
| 0.000241 | 0.004003 | 0.002747 | 0.001017 | 0.001423 | 0        | 0        | 0.001172 | 0.001311 | 0        | 0        | 0        | 0.000519 | 0.000615 | 0        |
| 0.000246 | 0        | 0        | 0.000286 | 0.000756 | 0        | 0        | 0.003069 | 8.23E-05 | 0.001298 | 0.000302 | 0        | 0.000468 | 0        | 0        |
| 0.000495 | 0.003151 | 0.007208 | 0.002021 | 0.006404 | 0        | 0.002926 | 0.018705 | 0.002654 | 0.013283 | 0.002822 | 0.007295 | 0.000864 | 0        | 0.00749  |
| 0.00033  | 0.004058 | 0.020506 | 0.001597 | 0.001237 | 0.001952 | 0.000182 | 0.001907 | 0.000526 | 0.000898 | 0.000404 | 0        | 0.000157 | 0        | 0        |
| 0.004468 | 0.03591  | 0.065524 | 0.02201  | 0.029843 | 0.031442 | 0.019278 | 0.050198 | 0.020069 | 0.038315 | 0.004196 | 0        | 0.002695 | 0.000387 | 0        |
| 0        | 0        | 0        | 0        | 0        | 0        | 0        | 0        | 0        | 0        | 0        | 0        | 0        | 0        | 0        |
| 0        | 0        | 0        | 0        | 0        | 0        | 0.000123 | 0        | 0        | 0.000308 | 0        | 0        | 0        | 0        | 0        |
| 0.006712 | 0.003428 | 0.016237 | 0.005033 | 0.01554  | 0.026519 | 0.011141 | 0.043709 | 0.020516 | 0.004656 | 0.006127 | 0.195001 | 0.023074 | 0.030097 | 0.014689 |
| 0        | 0        | 0        | 0        | 0        | 0        | 0        | 0        | 0        | 0        | 0        | 0        | 0        | 0        | 0        |
| 0        | 0        | 0        | 0        | 0        | 0        | 0        | 0        | 0        | 0        | 0        | 0        | 0        | 0        | 0        |
| 0.001351 | 0.01578  | 0.002624 | 0.006626 | 0.011852 | 0.000401 | 0.002849 | 0.017716 | 8.82E-05 | 0        | 0.007141 | 0        | 0.005563 | 0        | 0.002874 |
| 0        | 0        | 0        | 0        | 0        | 0        | 0        | 0        | 0        | 0        | 0        | 9.57E-05 | 0        | 0        | 0        |
| 0        | 0        | 0        | 0        | 0        | 0        | 0        | 0        | 0        | 0        | 0        | 0        | 0        | 0.000661 | 0        |
| 0.002393 | 0        | 0.000805 | 0.001904 | 0        | 0        | 0        | 0.015501 | 0.00345  | 0        | 0.000792 | 0.013142 | 0.006105 | 0.001344 | 0.000712 |
| 0.021704 | 0.000193 | 0        | 0.000247 | 0        | 0        | 0        | 0        | 0.00057  | 0        | 0.000299 | 0.006008 | 0.003567 | 0        | 0.000251 |
| 0.014903 | 0.000188 | 0        | 0.000134 | 0        | 0.000247 | 0        | 0.000178 | 0.000279 | 0        | 0        | 0.000597 | 0        | 0.001071 | 0.000281 |
| 0.000987 | 0.000159 | 0        | 0        | 0        | 0        | 0        | 0        | 0.000406 | 0        | 5.98E-05 | 0.000108 | 0.000145 | 0        | 0        |
| 0.016059 | 0.000178 | 0        | 9.09E-05 | 0        | 0        | 0        | 0.001545 | 0.000946 | 0        | 0.000152 | 0.000831 | 0.000291 | 0.006083 | 7.03E-05 |
| 0.026697 | 0        | 0        | 0        | 0        | 0.000856 | 0        | 0.000513 | 0.002527 | 0        | 0.000136 | 0.002932 | 0.001827 | 0.010526 | 0.001267 |
| 0.384486 | 0.001511 | 0.004637 | 0.001502 | 0.000113 | 0.001049 | 0        | 0.01086  | 0.03086  | 7.83E-05 | 0.001247 | 0.023347 | 0.016513 | 0.158028 | 0.021443 |
| 0.019379 | 0        | 0.001802 | 0.000524 | 0        | 0        | 0        | 0.000773 | 0.012237 | 0        | 0.000776 | 0.003451 | 0.003068 | 0        | 0.000155 |
| 0.011261 | 0        | 0        | 8.66E-05 | 0        | 0        | 0        | 0.000492 | 0.001969 | 0        | 0        | 0.00201  | 0.000923 | 0        | 0.000344 |
| 0.005023 | 0.000357 | 0.000927 | 0.000273 | 7.63E-05 | 0.000262 | 0.000107 | 0        | 7.05E-05 | 0        | 0        | 0        | 0        | 0        | 6.56E-05 |
| 0.002363 | 0.005083 | 0.007383 | 0.003133 | 0.000524 | 0.008688 | 0.000655 | 0.000773 | 0.001599 | 0.000658 | 0.000458 | 0.001232 | 0.001269 | 0.002483 | 0.001703 |
| 0        | 0.000198 | 0        | 0        | 0        | 0        | 0        | 0        | 0        | 0        | 0        | 0        | 0        | 0        | 0        |
| 0.000822 | 0.00494  | 0.002012 | 0.000268 | 0        | 0.002724 | 0        | 0        | 0        | 0.000148 | 0        | 0.000106 | 0        | 0        | 0        |
| 0.000593 | 0.007778 | 0.006526 | 8.22E-05 | 0        | 0.005586 | 0.000234 | 0        | 0.000344 | 0.000221 | 0.000141 | 0        | 0.000134 | 0.000638 | 7.03E-05 |
| 0        | 0.000163 | 0        | 6.49E-05 | 0.000249 | 0.000409 | 0.000337 | 0        | 0        | 0.000193 | 0        | 0.000111 | 0.00013  | 0        | 0.000241 |
| 0.000275 | 0.000139 | 0.001102 | 0.000368 | 9.95E-05 | 0.000617 | 0.000172 | 0        | 0.00022  | 0        | 0        | 0        | 0        | 0        | 0.000616 |
| 0.001597 | 0.038982 | 0.011163 | 0.046963 | 0.015139 | 0.014197 | 0.011294 | 0.018618 | 0.009795 | 0.003713 | 0.0171   | 0.000196 | 0.004801 | 0.004534 | 0.007283 |
| 0        | 0.001125 | 0        | 0.000883 | 0.001227 | 0.001551 | 0.001028 | 0.001972 | 0.001272 | 0.000199 | 0.000957 | 0        | 0.001921 | 0        | 0.00045  |
| 0.003642 | 0.00167  | 0        | 0.003293 | 0.002557 | 0.001127 | 0.001986 | 0.003409 | 0.003574 | 0.000957 | 0.005718 | 0        | 0.001795 | 0.006379 | 0.001391 |
| 0.118559 | 0.329961 | 0.104225 | 0.27511  | 0.676438 | 0.398506 | 0.514987 | 0.511414 | 0.46311  | 0.362694 | 0.646276 | 0.655242 | 0.617364 | 0.041239 | 0.714935 |
| 0        | 0.000738 | 0        | 0        | 0.000527 | 0.001613 | 0        | 0        | 0        | 0        | 0        | 0        | 0        | 0.00041  | 0        |
| 0.000233 | 0.002983 | 0.002694 | 0.002393 | 0.003227 | 0.011404 | 0.003079 | 0.000827 | 0.001178 | 0.001483 | 0.002081 | 0.001234 | 0.003343 | 0        | 0.001375 |
| 0.000246 | 0.001774 | 0.001015 | 0.007656 | 0.001668 | 0.003395 | 0.00014  | 0.00034  | 0        | 0.001402 | 0.000438 | 0.000239 | 0.00145  | 0.006038 | 0.000436 |
| 0        | 0.007749 | 0        | 0.070951 | 0.017135 | 0.008912 | 0.003046 | 0.001734 | 0.001184 | 0.00533  | 0.00531  | 0.001348 | 0.009299 | 0.02955  | 0.004651 |
| 0        | 0.000168 | 0        | 6.92E-05 | 0.000116 | 0.000147 | 0        | 0.000162 | 0.000106 | 0        | 0        | 0        | 0        | 0        | 0        |
| 0.002003 | 0.009726 | 0.003919 | 0.000554 | 0.000308 | 0.003372 | 0.000396 | 0.000238 | 0.00216  | 7.00E-05 | 0.008391 | 0        | 0        | 0.002871 | 0.000677 |
| 0.00111  | 0.166786 | 0.056775 | 0.014255 | 0        | 0.004591 | 0        | 0.000189 | 0.000876 | 0.002236 | 0.000372 | 0        | 0.000299 | 0        | 0        |
| 0        | 0        | 0.000892 | 0        | 0        | 0        | 0        | 0        | 0        | 0        | 0        | 0        | 0        | 0.000524 | 0        |
| 0        | 0.004182 | 0.019508 | 0.0019   | 0.000746 | 0.006011 | 0.003371 | 0.016392 | 0.000984 | 0.00371  | 0.000155 | 0.001534 | 0.00123  | 0.029938 | 0.003328 |
| 0        | 0        | 0        | 0        | 0.000202 | 0.000247 | 0        | 0        | 0        | 0.000115 | 0.000115 | 0        | 0.00013  | 0        | 0        |
| 0.00047  | 0.006703 | 0.008836 | 0.039143 | 0.009209 | 0.005324 | 0.0039   | 0.02488  | 0.004006 | 0.013274 | 0.014459 | 0.002587 | 0.010073 | 0.001777 | 0.001731 |
| 0.000508 | 0.000763 | 0        | 0.011542 | 0.013451 | 0.003912 | 0        | 0.000762 | 0.000317 | 0.003973 | 0.008682 | 0.00919  | 0.006569 | 0.043335 | 0.002183 |
| 0        | 0.03645  | 0.042813 | 0.027965 | 0.001565 | 0.036519 | 0.004075 | 0.002302 | 0.007676 | 0.005605 | 0.000432 | 0.001834 | 0.000432 | 0.010344 | 0.002653 |

|          |          |          |          |          |          |          |          |          |          |          |          |          |          |          |
|----------|----------|----------|----------|----------|----------|----------|----------|----------|----------|----------|----------|----------|----------|----------|
| 0        | 0.003597 | 0.00077  | 0.012074 | 0        | 0.0075   | 0.000655 | 0        | 0.000896 | 0.006987 | 8.25E-05 | 0.003293 | 0.000141 | 0.003418 | 0.002775 |
| 0        | 0.004444 | 0.004077 | 0.005072 | 0.000109 | 0.028865 | 0.028998 | 0.008639 | 0.006677 | 0.04561  | 0.008243 | 0.003915 | 0.004039 | 0.000524 | 0.03612  |
| 0.001088 | 0.008977 | 0.023498 | 0.017661 | 0.004766 | 0.013194 | 0.008877 | 0.001972 | 0.01698  | 0.006825 | 0.002983 | 0.014142 | 0.002027 | 0        | 0.008869 |
| 0.010342 | 0        | 0        | 0        | 0        | 0        | 0        | 0        | 0.001026 | 0        | 6.14E-05 | 0        | 0.000538 | 0.000706 | 0.000211 |
| 0.000521 | 0        | 0        | 0.000286 | 0        | 0        | 0.000496 | 0        | 0.000905 | 0.000176 | 0.000322 | 9.32E-05 | 0.00176  | 0        | 0.000539 |
| 0.001097 | 0        | 0        | 0.001039 | 0.000103 | 0.000239 | 0.000451 | 0        | 0.001749 | 0.001231 | 0.000171 | 0        | 0.000389 | 0.000456 | 0.000124 |
| 0.004002 | 0.000173 | 0.001102 | 0.000151 | 0.000182 | 0        | 0.00061  | 0        | 0.000552 | 0.000353 | 0.001459 | 0        | 0.000699 | 0        | 0        |
| 0.00127  | 0.000347 | 0.00098  | 0.000684 | 0.000275 | 0.000347 | 0.001058 | 0        | 0.00149  | 0.001665 | 0.002264 | 0        | 0.000774 | 0        | 0.000176 |
| 0.000572 | 0        | 0        | 0.000121 | 0.000458 | 0.00054  | 0.001859 | 0        | 0.00017  | 0.000907 | 0.001001 | 0.000134 | 0.000267 | 0.001162 | 7.03E-05 |
| 0.064863 | 0.018341 | 0.087814 | 0.078351 | 0.02341  | 0.056441 | 0.21315  | 0        | 0.279392 | 0.269667 | 0.121444 | 0.002683 | 0.152358 | 0.3323   | 0.082687 |
| 0.005836 | 0.001105 | 0.013227 | 0.007379 | 0.004016 | 0.006366 | 0.024102 | 0        | 0.011934 | 0.016288 | 0.023464 | 0.000307 | 0.011668 | 0.018797 | 0.009698 |
| 0.000775 | 0.000322 | 0.000735 | 0.001026 | 9.95E-05 | 0        | 0        | 0        | 0        | 0.000101 | 0.00028  | 0        | 0.000334 | 0        | 0        |
| 0.001669 | 0.000144 | 0        | 0.000467 | 0.00137  | 0.000394 | 0.000857 | 0.00101  | 0.000614 | 0.000101 | 0.000912 | 0        | 0.000652 | 0        | 0        |
| 0.010134 | 0.025263 | 0.030129 | 0.0427   | 0.024451 | 0.044482 | 0.018444 | 0.026998 | 0.005954 | 0.012759 | 0.015761 | 0        | 0.012647 | 0        | 0.000789 |
| 0.023267 | 0.06523  | 0.078786 | 0.128534 | 0.06048  | 0.115282 | 0.052961 | 0.067303 | 0.020601 | 0.040928 | 0.060191 | 0        | 0.032161 | 0.003007 | 0.001447 |
| 0.000229 | 0.000396 | 0.001872 | 0.000216 | 9.95E-05 | 0        | 0.000221 | 0        | 0.000106 | 0        | 4.69E-05 | 0        | 0.000448 | 0        | 0        |
| 0.002147 | 0.00111  | 0        | 0.000515 | 0.000279 | 0.000995 | 9.41E-05 | 0.000243 | 8.82E-05 | 0.000456 | 0.00017  | 0        | 0.000283 | 0        | 0        |
| 0.001292 | 0        | 0        | 0.000528 | 0.000109 | 0.000262 | 9.73E-05 | 0        | 0        | 0        | 0.000154 | 0        | 0        | 0        | 0        |
| 0.000551 | 0.000357 | 0        | 0        | 0.000249 | 0.000772 | 0.00038  | 0.001621 | 0.000185 | 0.00106  | 0        | 0.000317 | 0.000735 | 0        | 0.000422 |
| 0.095736 | 0.006599 | 0.025422 | 0        | 0.002368 | 0.01412  | 0.002771 | 0.006132 | 0.006116 | 0.004477 | 0        | 0.002149 | 0.008718 | 0.000547 | 0.000911 |
| 0.000512 | 0.0098   | 0.02481  | 0.000351 | 0.011869 | 0.01223  | 0.015797 | 0.030191 | 0.000485 | 0.005263 | 0        | 0        | 0.011971 | 0        | 0        |
| 0.003435 | 0.004087 | 0.008958 | 0.000134 | 0.00647  | 0.010409 | 0.00703  | 0.013491 | 0.002116 | 0.003458 | 5.82E-05 | 0        | 0.004534 | 0        | 0.000267 |
| 0.001592 | 0.000213 | 0.000752 | 0.000156 | 0.000468 | 0.001003 | 0        | 0.000578 | 0.000602 | 0        | 0.000239 | 0.001791 | 0.000283 | 0.000911 | 0.000272 |
| 0.003926 | 0        | 0        | 7.36E-05 | 0        | 0.000239 | 0.000191 | 0        | 0.00025  | 7.00E-05 | 0.000223 | 0        | 0        | 0        | 0.00023  |
| 0.002456 | 0.000134 | 0        | 0.001783 | 0        | 0.001582 | 0.001236 | 0.000427 | 0.000744 | 0.001133 | 0.00164  | 0        | 0.000562 | 0.000866 | 0.001532 |
| 0.002312 | 0.002091 | 0.004689 | 0.0037   | 0.001973 | 0.003426 | 0.001528 | 0.001594 | 0.00598  | 0.002104 | 0.000351 | 0.004157 | 0.00123  | 0.00442  | 0.001726 |
| 0.010693 | 0.001452 | 0        | 0.000679 | 0.00073  | 0.002762 | 0.000295 | 0.000756 | 0.000967 | 9.23E-05 | 0.001523 | 0.000532 | 0.00068  | 0.004056 | 0.001834 |
| 0.001787 | 0.000931 | 0        | 0.000783 | 0.000232 | 0.000772 | 0.000513 | 0.00141  | 0.001173 | 6.44E-05 | 0.002823 | 0.00559  | 0.005096 | 0        | 0.000726 |
| 0        | 0.00049  | 0        | 9.95E-05 | 0        | 0.000216 | 7.79E-05 | 0.00033  | 0        | 0        | 0.000123 | 0.000295 | 0.000141 | 0        | 0.000281 |
| 0.000517 | 0.010845 | 0.002414 | 0.062131 | 0.005674 | 0.003935 | 0.003926 | 0.001632 | 0.006783 | 0.035212 | 0.002873 | 0.000126 | 0.000892 | 0        | 0.009806 |
| 0.000258 | 0.02063  | 0        | 0.006054 | 0.000391 | 0.000579 | 0.000723 | 0        | 0.002166 | 0.041298 | 0.001035 | 0.000504 | 0.000609 | 0        | 0.001126 |
| 0        | 0        | 0.004759 | 0.002056 | 0        | 0        | 0.002985 | 0        | 0        | 0.005647 | 0.001452 | 0        | 0.000287 | 0        | 0        |
| 0        | 0.000461 | 0        | 0        | 0        | 0.000802 | 0        | 0        | 0.000112 | 0.000302 | 0        | 0        | 0        | 0        | 0        |
| 0.000284 | 0.003339 | 0        | 0.000541 | 0.006069 | 0.001304 | 0        | 0        | 0        | 0.001489 | 0.005055 | 0        | 0        | 0.00057  | 0        |

| CPR04    | CPR05    | CPR03    | CPR07    | CPR08    | CPR09    | CPR10    | CPR06    | HC101    | HC096    | HC097    | HC098    | HC099    | HC100    | HC102    |          |
|----------|----------|----------|----------|----------|----------|----------|----------|----------|----------|----------|----------|----------|----------|----------|----------|
| 0        | 0        | 0        | 0        | 0        | 0        | 0        | 0.001223 | 0        | 0        | 0        | 0        | 0        | 0        | 0        |          |
| 0        | 0        | 0        | 0        | 0.000358 | 0        | 0        | 0        | 0        | 0        | 0        | 0        | 0        | 0        | 0        |          |
| 0.000337 | 0.008509 | 0        | 0        | 0.046183 | 0.000572 | 0.000913 | 0.052667 | 0        | 0        | 0.000253 | 0        | 0        | 0        | 0        |          |
| 8.81E-05 | 0.001585 | 0        | 0        | 0.006805 | 0        | 0.000357 | 0.007135 | 0        | 0        | 0.000101 | 0        | 0.000148 | 0        | 0        |          |
| 0.000123 | 0.006549 | 0        | 0        | 0.018884 | 0.000206 | 0.000371 | 0.016499 | 5.46E-05 | 0        | 0        | 0        | 0        | 0        | 0.000146 |          |
| 0.000252 | 0.000192 | 0        | 0.000188 | 0.000572 | 0.000212 | 0.001335 | 0.0009   | 0.000251 | 0        | 0        | 4.45E-05 | 0.000358 | 0        | 0.000413 |          |
| 0        | 0        | 0        | 0        | 0        | 0        | 0        | 0        | 7.10E-05 | 0        | 0.000106 | 0        | 0.000282 | 0        | 0.00013  |          |
| 0.000108 | 0.000571 | 0        | 0.000317 | 0.001954 | 0.001556 | 0.001716 | 0.000612 | 0.002942 | 0.000605 | 0.000929 | 0.000384 | 0.007938 | 0.000862 | 0.002934 |          |
| 0.01189  | 0        | 0.014218 | 0        | 0.032902 | 0.00709  | 0.026038 | 0.013792 | 0.00336  | 0.011183 | 0.123545 | 0.000481 | 0.015334 | 0.012911 | 0.016706 |          |
| 0.00681  | 0.003592 | 0.003955 | 0.034349 | 0.009202 | 0.001472 | 0.021181 | 0.00245  | 0.013889 | 0.008863 | 0.005257 | 0.002469 | 0.00572  | 0.004583 | 0.006401 |          |
| 0        | 0.023144 | 0.000928 | 0        | 0        | 0        | 0.000748 | 0.004339 | 0.000959 | 0.000462 | 0.003429 | 0.000239 | 0        | 0.000342 | 0.00054  |          |
| 0.000886 | 0        | 0.000952 | 0        | 0.000608 | 0        | 0        | 0.000191 | 0.000246 | 0.000183 | 0.001165 | 0        | 0        | 0.000309 | 0        |          |
| 0.005052 | 0.004077 | 0.001496 | 0        | 0.009596 | 0        | 0.001181 | 0.00236  | 0.000915 | 0.001287 | 0.001043 | 0.000613 | 0        | 0.001231 | 0.002148 |          |
| 0.000926 | 0.002322 | 0.000174 | 0.000312 | 0.00176  | 0.000199 | 0.000882 | 0.003544 | 0.000361 | 0.000391 | 0.00288  | 0.000277 | 0.001364 | 0.000957 | 0.000292 |          |
| 0.017254 | 0.045065 | 0.010555 | 0.157766 | 0.02171  | 0.011866 | 0.023656 | 0.032301 | 0.019011 | 0.00533  | 0.017481 | 0.009186 | 0.00716  | 0.014402 | 0.014013 |          |
| 0        | 0        | 0        | 0        | 0        | 0        | 0        | 0        | 0        | 0        | 0        | 0        | 0        | 0        | 0        |          |
| 0        | 0        | 0        | 0        | 0        | 0        | 0        | 0        | 0.000178 | 0.002528 | 6.76E-05 | 0        | 0        | 0.000642 | 0.000132 |          |
| 0.023933 | 0.006659 | 0.017016 | 0        | 0.034913 | 0.004917 | 0.0126   | 0.00111  | 0.004567 | 0.045864 | 0.17177  | 0.105807 | 0.016372 | 0.027086 | 0.0223   |          |
| 0        | 0        | 0        | 0        | 0        | 0        | 0        | 0        | 0        | 5.42E-05 | 0        | 0.000618 | 0        | 0        | 0.000682 |          |
| 0        | 0        | 0        | 0        | 0        | 0        | 0        | 0        | 0.001724 | 0.000639 | 0.001951 | 0.004367 | 0.00085  | 0.000546 | 0.006501 |          |
| 0.01429  | 0.007891 | 0.001944 | 0        | 0        | 0.028174 | 0.014697 | 0.01311  | 0.004204 | 0.007442 | 0.028611 | 0.006142 | 0.004429 | 0.023533 | 0.005842 |          |
| 0        | 0        | 0        | 0        | 0        | 0        | 0        | 0        | 0        | 0        | 0.00019  | 0        | 0.000322 | 0.000276 | 0        |          |
| 0        | 0        | 0        | 0        | 0        | 0        | 0        | 0        | 0        | 0.000691 | 0.000234 | 0.00011  | 0        | 0        | 0.002024 | 0.000508 |
| 0.001308 | 0.000285 | 0        | 0.002567 | 0.00239  | 0.000758 | 0.001376 | 0.000845 | 0.027479 | 0.001099 | 0.006004 | 0.00066  | 0.036963 | 0.011227 | 0.015968 |          |
| 0.000118 | 0.000102 | 0        | 0.000505 | 0.000308 | 0        | 0.002231 | 0.000432 | 0.007211 | 0.000856 | 0.003737 | 0        | 0.019853 | 0.020604 | 0.007519 |          |
| 0.000108 | 8.95E-05 | 0        | 0        | 0.000558 | 0.000238 | 0.001878 | 0.00023  | 0.002914 | 0.000793 | 0.004404 | 0.000246 | 0.011962 | 0.003771 | 0.006202 |          |
| 0        | 0        | 0        | 0        | 0        | 0        | 0        | 0        | 0.001185 | 0        | 0.000198 | 0.000307 | 0.002475 | 0.000336 | 0.000805 |          |
| 0        | 6.82E-05 | 0        | 0        | 0        | 0        | 0.001411 | 0        | 0.004231 | 0.001181 | 0.002365 | 0.000832 | 0.007016 | 0.003902 | 0.00317  |          |
| 0.000116 | 0.000153 | 0        | 0.000184 | 0.000315 | 0        | 0.003463 | 0.000413 | 0.011396 | 0.001646 | 0.012072 | 0.000544 | 0.015453 | 0.012362 | 0.007607 |          |
| 0.000224 | 0.002041 | 0        | 0.000891 | 0.004508 | 0.000643 | 0.035923 | 0.003576 | 0.038391 | 0.010039 | 0.021552 | 0.004784 | 0.067185 | 0.038079 | 0.035513 |          |
| 0        | 0.000337 | 0        | 0.000689 | 0.00058  | 0.000219 | 0.001603 | 0.000249 | 0.006692 | 0.000819 | 0.004108 | 0.000216 | 0.015022 | 0.005528 | 0.008275 |          |
| 0        | 0        | 0        | 0        | 0.000322 | 0        | 0.000515 | 0.000425 | 0.002212 | 0.000265 | 0.002745 | 4.96E-05 | 0.004758 | 0.00258  | 0.003059 |          |
| 0.000133 | 0        | 0        | 0.000156 | 0.000315 | 0        | 0.001421 | 0.000382 | 0.000366 | 0.00238  | 0.009264 | 0.000137 | 0.004968 | 0.000303 | 0.000849 |          |
| 0.001208 | 0.003988 | 0.000522 | 0.003012 | 0.008351 | 0.006711 | 0.000813 | 0.006801 | 0.000653 | 0.000342 | 0.002318 | 0.0003   | 0.002985 | 0.001984 | 0.002452 |          |
| 0        | 0        | 0        | 0        | 0        | 0        | 0        | 0        | 0        | 0        | 0.00019  | 0.000141 | 0.005807 | 0.001773 | 0.00424  |          |
| 0        | 0.000136 | 0        | 0        | 0        | 0        | 0        | 0        | 0        | 0.000213 | 0.000545 | 0.010028 | 0.00325  | 0.205394 | 0.009075 | 0.054933 |
| 0.000234 | 0.000886 | 0        | 0.000165 | 0        | 0.001106 | 0        | 0.005137 | 0.000647 | 0.001139 | 0.007638 | 0.004845 | 0.254329 | 0.010187 | 0.057298 |          |
| 0        | 0        | 5.49E-05 | 0.00034  | 0        | 0        | 0.000168 | 0        | 0.000634 | 0.000382 | 0.000317 | 0.00019  | 0.000521 | 0.000609 | 0.001111 |          |
| 0.000108 | 6.82E-05 | 0        | 0.000542 | 0.000351 | 0        | 0.000141 | 0        | 0.001177 | 0.000297 | 0.001085 | 0.000356 | 0.002138 | 0.000263 | 0.001104 |          |
| 0.005469 | 0.001018 | 0.003165 | 0.007558 | 0.038641 | 0.003355 | 0.023838 | 0.038061 | 0.002453 | 0.00099  | 0.000654 | 0.000158 | 0.000604 | 0.000352 | 0.00042  |          |
| 0.000314 | 0.000111 | 0.000527 | 0        | 0.000623 | 0        | 0.001205 | 0.000452 | 0.000855 | 0        | 0        | 9.29E-05 | 0        | 0.000122 | 0        |          |
| 0.001462 | 0.000337 | 0.001691 | 0.000161 | 0.001274 | 0.00099  | 0.004136 | 0.0015   | 0.00112  | 0.000411 | 0        | 0.000633 | 0        | 0.000141 | 0        |          |
| 0.652094 | 0.393612 | 0.629173 | 0.088824 | 0.343702 | 0.245258 | 0.53182  | 0.229224 | 0.388198 | 0.175542 | 0.051252 | 0.457839 | 0.026933 | 0.114037 | 0.025649 |          |
| 0        | 0        | 0.000615 | 0        | 0        | 0        | 0.001273 | 0.001071 | 0        | 0        | 0        | 0        | 0        | 0        | 0        |          |
| 0.001525 | 0.000179 | 0.000918 | 0.002176 | 0.001002 | 0.004159 | 0.001325 | 0.002699 | 0.000691 | 0.001002 | 9.71E-05 | 0.000645 | 0        | 0.000691 | 0.000536 |          |
| 0.000956 | 0.000149 | 0        | 0        | 0.001188 | 0        | 0.002643 | 0        | 0.000156 | 0.001284 | 0.000106 | 5.85E-05 | 0        | 0.000165 | 0        |          |
| 0.011148 | 0.001065 | 0.001057 | 0        | 0.006111 | 0.001093 | 0.011663 | 0.001172 | 0.001508 | 0.00547  | 0.002027 | 0.000735 | 0        | 0.000141 | 0        |          |
| 0.000111 | 9.37E-05 | 0        | 0        | 0        | 0        | 0        | 0        | 0        | 0        | 0        | 0        | 0        | 0        | 0        |          |
| 0.000184 | 0.000818 | 0        | 0.455317 | 0.071013 | 0.001478 | 0.000168 | 0.004277 | 8.47E-05 | 0        | 0        | 0        | 0        | 0.000497 | 0        |          |
| 0.002337 | 0.00046  | 0        | 0        | 0.015413 | 0        | 0        | 0.001554 | 0        | 0        | 0.000101 | 0        | 0        | 0.000122 | 0        |          |
| 0.000234 | 0.00081  | 0        | 0        | 0.000372 | 0.000296 | 0.000209 | 0.000241 | 0        | 0        | 0.000215 | 0        | 0        | 0        | 0        |          |
| 0.008043 | 5.54E-05 | 0.000401 | 0.004642 | 0.002726 | 0        | 0.001843 | 0.00654  | 0        | 0.000967 | 0.000629 | 0.000234 | 0        | 0.00585  | 0.001626 |          |
| 0        | 0.000175 | 0.000126 | 0        | 0.000358 | 0        | 0        | 0.000495 | 0        | 0        | 0        | 0        | 0        | 0        | 0        |          |
| 0.020217 | 0.041461 | 0.005472 | 0        | 0.018855 | 0.001453 | 0.02104  | 0.005266 | 0.000576 | 0.000636 | 0.000186 | 0.000198 | 0.000293 | 0.000122 | 0.00096  |          |
| 0.00084  | 0.002859 | 0.004138 | 0        | 0.004365 | 0        | 0.001551 | 0.00044  | 0        | 0        | 0        | 4.20E-05 | 0        | 0        | 0        |          |
| 0.001464 | 0.035637 | 0.000577 | 0.000179 | 0.05424  | 0.000489 | 0.010136 | 0.012974 | 0        | 7.13E-05 | 8.87E-05 | 0        | 0.00013  | 0        | 0        |          |

|          |          |          |          |          |          |          |          |          |          |          |          |          |          |          |
|----------|----------|----------|----------|----------|----------|----------|----------|----------|----------|----------|----------|----------|----------|----------|
| 0.000677 | 0.022654 | 0.00301  | 0        | 0.026304 | 0        | 0.004654 | 0.00127  | 7.65E-05 | 0.002066 | 0.000384 | 0        | 0        | 0        | 0.000141 |
| 0.016182 | 0.031683 | 0.020975 | 0        | 0.001546 | 0.008697 | 0.030184 | 0.002092 | 7.92E-05 | 0.002317 | 0.000287 | 3.56E-05 | 0        | 0.000253 | 0        |
| 0.004274 | 0.005969 | 0.006159 | 0        | 0.01658  | 0.003548 | 0.006669 | 0.029956 | 0        | 0.000274 | 0.00016  | 0        | 0.000785 | 0.000148 | 0.000158 |
| 0        | 0        | 0        | 0        | 0        | 0        | 0.000192 | 0        | 0.003097 | 0.000328 | 0.000545 | 0.000637 | 0.002464 | 0.002741 | 0.004316 |
| 0.000438 | 0        | 0.000265 | 0.000546 | 0        | 0        | 0        | 0        | 0.002955 | 0.000668 | 0.001938 | 0.000219 | 0.001585 | 0.007094 | 0.002679 |
| 0.000272 | 0        | 0.000229 | 0.00079  | 0        | 0        | 0        | 0        | 0.001002 | 0.000514 | 0.000895 | 0.000289 | 0.002576 | 0.004054 | 0.003395 |
| 0.000322 | 0        | 3.34E-05 | 0.000496 | 0        | 0        | 0.00023  | 0        | 0.003095 | 0.007736 | 0.001871 | 0.004111 | 0.00224  | 0.009016 | 0.009317 |
| 0.000463 | 0        | 0.000446 | 0.000859 | 0        | 0        | 0.000189 | 0        | 0.007364 | 0.009673 | 0.005789 | 0.008209 | 0.004034 | 0.010253 | 0.020013 |
| 0.000143 | 0        | 0.000663 | 0.000579 | 0        | 0        | 0        | 0        | 0.000399 | 0.00091  | 0.001203 | 0.001955 | 0.00025  | 0.001329 | 0.003277 |
| 0.05599  | 0.000328 | 0.214174 | 0.121483 | 0        | 0        | 0.009806 | 0        | 0.260063 | 0.156093 | 0.163376 | 0.284837 | 0.143882 | 0.260859 | 0.370219 |
| 0.005374 | 5.96E-05 | 0.024489 | 0.010928 | 0        | 0        | 0.001634 | 0        | 0.010109 | 0.018066 | 0.012689 | 0.019547 | 0.015757 | 0.038293 | 0.036819 |
| 0.000118 | 0.000341 | 5.49E-05 | 0.00017  | 0.000365 | 0.000636 | 0.000333 | 0.000678 | 0.000451 | 0.000554 | 0        | 0.000179 | 0        | 0        | 0.000399 |
| 0.000647 | 0.001551 | 0.000124 | 0.000496 | 0        | 0.000913 | 0.001438 | 0.000639 | 0.001726 | 0.002154 | 0.000194 | 0.002212 | 0.000304 | 0.003037 | 0.000359 |
| 0.012974 | 0.074737 | 0.005438 | 0.019009 | 0.021038 | 0.143754 | 0.030462 | 0.101178 | 0.021811 | 0.094597 | 0.042626 | 0.009205 | 0.01127  | 0.069012 | 0.038034 |
| 0.034867 | 0.256315 | 0.012255 | 0.059924 | 0.06453  | 0.451337 | 0.084186 | 0.377857 | 0.068248 | 0.330062 | 0.186752 | 0.040893 | 0.02748  | 0.170364 | 0.139731 |
| 0        | 0.000158 | 0        | 0.000533 | 0        | 0        | 0.000168 | 0.002107 | 0.000617 | 0.001601 | 0.001279 | 9.67E-05 | 0.000275 | 0.011526 | 0.001264 |
| 0.000242 | 0.002791 | 0        | 0.001074 | 0.000594 | 0.001755 | 0.001064 | 0.002037 | 0.001076 | 0.00343  | 0.001022 | 0.000633 | 0.000409 | 0.001198 | 0.001913 |
| 0.000106 | 0.000345 | 0        | 0.000725 | 0        | 0.000437 | 0.000175 | 0.001087 | 0.000145 | 0.002403 | 0.003403 | 0        | 0.000575 | 0.000632 | 0.000408 |
| 0.000435 | 0        | 0.000825 | 0.000367 | 0.000365 | 0.000534 | 0.000209 | 0        | 0.001715 | 0.000662 | 0.000177 | 0.000165 | 0        | 0.000684 | 0.000213 |
| 0.002428 | 0.00023  | 6.20E-05 | 0.009803 | 0.017488 | 0.007964 | 0.011897 | 0        | 0.022614 | 0.002956 | 0.007495 | 9.54E-05 | 0.013239 | 0.011394 | 0.008556 |
| 0.000199 | 0.000562 | 0.002089 | 0        | 0.013553 | 0.016629 | 0.003127 | 0        | 0.000904 | 0.015403 | 0.007233 | 0.000674 | 0.00504  | 0.020548 | 0.011413 |
| 0.001585 | 0.000767 | 0.000902 | 0.002906 | 0.004572 | 0.030546 | 0.005203 | 0.000191 | 0.013267 | 0.028104 | 0.016662 | 0.000627 | 0.006531 | 0.02756  | 0.016778 |
| 0.000113 | 0.00046  | 0.000107 | 0        | 0.001002 | 0        | 0.000364 | 0        | 6.28E-05 | 0.001452 | 0.007132 | 0.000687 | 0.004266 | 0.000398 | 0.001097 |
| 0        | 0        | 0.000124 | 0.000294 | 0        | 0        | 0        | 0        | 0.000109 | 0.00079  | 0.001106 | 0.000158 | 0.002109 | 0.000349 | 0.000571 |
| 0.000463 | 0.00023  | 0.000828 | 0.004601 | 0.000358 | 0        | 0.000347 | 0        | 0.001194 | 0.003045 | 0.007098 | 0.000602 | 0.005098 | 0.001464 | 0.003001 |
| 0.001223 | 0.001295 | 0.001915 | 0        | 0.009996 | 0.00126  | 0.002701 | 0.00097  | 0.002502 | 0.001404 | 0.002289 | 0.000969 | 0.001125 | 0.001267 | 0.001025 |
| 0.000267 | 0.001078 | 0.000422 | 0.001171 | 0.001288 | 0.000489 | 0.002169 | 0.001188 | 0.001032 | 0.002591 | 0.000692 | 0.00077  | 0.001299 | 0.000349 | 0.000281 |
| 0.001764 | 0.001006 | 0        | 0        | 0.000694 | 0.00252  | 0.001061 | 0.001149 | 0.004966 | 0.001375 | 0.001423 | 0.000413 | 0.001505 | 0.00332  | 0.000422 |
| 0        | 0        | 0        | 0        | 0.000665 | 0.000514 | 0.000182 | 0.000249 | 6.28E-05 | 0.000331 | 0.003403 | 0        | 0.000427 | 0.001405 | 0.001    |
| 0.013203 | 0.000162 | 0.000391 | 0        | 0.033632 | 0.003008 | 0.001037 | 0.000257 | 0.001041 | 0.001178 | 0.009066 | 0.003131 | 0.000409 | 0.00127  | 0.00039  |
| 0.007311 | 0.000128 | 0.000444 | 0        | 0.0079   | 0.000476 | 0.00046  | 0.000226 | 0.000871 | 0.001375 | 0.000975 | 0.000929 | 0        | 0.000665 | 0.000141 |
| 0.00033  | 0        | 0        | 0        | 0.012115 | 0        | 0        | 0        | 0.00431  | 0.001626 | 0.00027  | 0.001665 | 0        | 0.001063 | 0.002143 |
| 0.000209 | 0        | 0.000122 | 0        | 0.00176  | 0        | 0        | 0.000183 | 0.002103 | 0.000836 | 0.006701 | 0.001156 | 0        | 0        | 0        |
| 0.045479 | 0        | 0.003778 | 0.002406 | 0.000329 | 0.000476 | 0.030387 | 0        | 0.006465 | 0.010201 | 0.001592 | 0.006778 | 0        | 0.003929 | 0.00154  |

| HC076    | HC104    | HC105    | HC106    | HC107    | HC095    | HC108    | HC109    | HC103    | HC094    | HC089    | HC092    | HC077    | HC078    | HC079             |
|----------|----------|----------|----------|----------|----------|----------|----------|----------|----------|----------|----------|----------|----------|-------------------|
|          | 0        | 0        | 0        | 0        | 0        | 0        | 0        | 0        | 0        | 0        | 0.00012  | 0        | 0.000193 | 0                 |
|          | 0        | 0        | 0        | 0        | 0        | 0        | 0        | 0        | 0        | 0        | 0.000106 | 0        | 0        | 0                 |
|          | 0        | 0        | 0.000846 | 0.000123 | 0.000463 | 0.00015  | 0        | 0.001876 | 0        | 0.00021  | 0.000144 | 0.001083 | 0        | 0 9.33E-05        |
|          | 0        | 0.000147 | 0.001032 | 5.20E-05 | 0        | 8.45E-05 | 0        | 0.006749 | 0.000139 | 0.000183 | 0        | 0.00047  | 0        | 0 0.000141        |
|          | 0        | 0.00024  | 0.002208 | 0        | 0.000161 | 6.13E-05 | 3.12E-05 | 0.027027 | 0        | 8.47E-05 | 0.000132 | 0.000341 | 0        | 0 0               |
| 0.000158 | 0.001248 | 0.00085  | 0        | 0.00235  | 0.000158 | 0.000207 | 0        | 0        | 0.000192 | 0.000244 | 0        | 0        | 0.000185 | 0.000141          |
|          | 0        | 9.24E-05 | 0.000846 | 0        | 0.001713 | 4.22E-05 | 0        | 0        | 0        | 0.000165 | 6.22E-05 | 0.001116 | 0        | 0 0.000276        |
| 0.000799 | 0.013661 | 0.011633 | 0.001905 | 0.00414  | 0.002    | 0.000535 | 0.010517 | 0.001806 | 0.005842 | 0.000294 | 0.004688 | 0.000577 | 0.001751 | 0.000823          |
| 0.035785 | 0.017753 | 0.03407  | 0.005551 | 0.062008 | 0.054666 | 0.039988 | 0.080163 | 0.000429 | 0.012897 | 0.00668  | 0.041518 | 0.03098  | 0.008002 | 0.008217          |
| 0.011537 | 0.001645 | 0.024224 | 0.002317 | 0.041863 | 0.026035 | 0.012983 | 0.029965 | 0.001371 | 0.010676 | 0.02085  | 0.039085 | 0.011728 | 0.006001 | 0.00522           |
| 0.000724 | 0.00036  | 0.000265 | 0.002712 | 0.005089 | 0.001578 | 0.002677 | 0.00272  | 0        | 0.006792 | 0.000752 | 0.003347 | 0.003834 | 0.000794 | 0.000126          |
| 0.000216 | 0.000867 | 0.000998 | 0        | 0.00065  | 0.001525 | 0.004334 | 0        | 0        | 0        | 5.73E-05 | 0.001212 | 0        | 0        | 0                 |
| 0.000516 | 0.001176 | 0.002715 | 0.000346 | 0.000872 | 0.002087 | 0.010242 | 0.001556 | 0.000155 | 0.000549 | 0.00254  | 0.001549 | 0.003112 | 0.000344 | 0.001787          |
| 0.00015  | 0.002088 | 0.004606 | 0.00052  | 0.006132 | 0.003479 | 0.009598 | 0.004757 | 0        | 0.002038 | 0.001257 | 0.00224  | 0.00066  | 0.004644 | 0.000114          |
| 0.012286 | 0.019104 | 0.033124 | 0.018791 | 0.015874 | 0.038693 | 0.088581 | 0.013935 | 0.00059  | 0.013057 | 0.021368 | 0.025579 | 0.012285 | 0.021688 | 0.007583          |
|          | 0        | 0        | 0        | 0        | 0        | 0        | 0        | 0        | 0        | 0.142848 | 0.000106 | 0        | 0        | 0                 |
|          | 0        | 0        | 0        | 0.001857 | 0        | 5.28E-05 | 3.32E-05 | 0        | 0        | 0        | 7.22E-05 | 8.76E-05 | 0        | 0 0.000112        |
| 0.040959 | 0.00575  | 0.034651 | 0.008867 | 0.005974 | 0.022017 | 0.006932 | 0.029761 | 0        | 0.008972 | 0.002953 | 0.054886 | 0.147006 | 0.003751 | 0.033187          |
|          | 0        | 0        | 0        | 0.000123 | 0        | 0.000839 | 0        | 0        | 0        | 0.000928 | 0.001345 | 0.004029 | 0.001628 | 0.000223 0        |
| 0.003519 | 0.000157 | 0        | 0.00168  | 0.001012 | 0.002395 | 0.000111 | 0.000596 | 0        | 0.014921 | 0.012494 | 0.02291  | 0.02088  | 0        | 0.000638          |
| 0.000782 | 0.015064 | 0.019384 | 0.007656 | 0.015465 | 0.064574 | 0.017486 | 0.000756 | 0.001028 | 0.003991 | 0.063581 | 0.004614 | 0.008637 | 0.047826 | 0.016411          |
|          | 0        | 0        | 0.000221 | 6.87E-05 | 0.000483 | 5.70E-05 | 0.000332 | 0.000829 | 0        | 0.000281 | 0.000204 | 0.004098 | 0        | 0.000382 0        |
|          | 0        | 0        | 0.007556 | 0.000133 | 0.00168  | 0.003695 | 0.219621 | 0.000873 | 0.000147 | 0.118772 | 0.046503 | 0.012727 | 0        | 0.002908 0.000129 |
|          | 0.00272  | 0.029999 | 0.057895 | 0.011117 | 0.086988 | 0.017039 | 0.044571 | 0.029019 | 0.008994 | 0.357994 | 0.001967 | 0.11866  | 0.001711 | 0.060521 0.001861 |
| 0.000782 | 0.004769 | 0.034152 | 0.005272 | 0.033099 | 0.008177 | 0.000521 | 0.002647 | 0.027205 | 0.007403 | 0.004893 | 0.011469 | 0.00439  | 0.054807 | 0.000131          |
| 0.000699 | 0.003818 | 0.019193 | 0.001422 | 0.010061 | 0.004662 | 0.000416 | 0.004713 | 0.002407 | 0.002569 | 0.003072 | 0.002812 | 0.000721 | 0.017153 | 0.002293          |
| 0.000183 | 0.002025 | 0.004723 | 0.000602 | 0.001713 | 0.000834 | 0.00031  | 0.002022 | 0.000374 | 0.000589 | 0.000261 | 0.000392 | 0.000824 | 0.000945 | 0.000257          |
| 0.000665 | 0.008783 | 0.018629 | 0.001765 | 0.01278  | 0.012594 | 0.004748 | 0.002662 | 0.001114 | 0.004847 | 0.008799 | 0.013953 | 0.00068  | 0.010747 | 0.00177           |
| 0.002995 | 0.008068 | 0.03711  | 0.003651 | 0.048169 | 0.019178 | 0.003095 | 0.012437 | 0.006205 | 0.025454 | 0.007741 | 0.038448 | 0.007482 | 0.077504 | 0.002079          |
| 0.010473 | 0.073428 | 0.13133  | 0.009916 | 0.172822 | 0.100286 | 0.028195 | 0.07452  | 0.007997 | 0.134768 | 0.067385 | 0.184046 | 0.006204 | 0.123307 | 0.012543          |
| 0.000774 | 0.005807 | 0.02998  | 0.00469  | 0.024731 | 0.004282 | 0.015442 | 0.011506 | 0.011546 | 0.01514  | 0.005311 | 0.020586 | 0.003566 | 0.028419 | 0.000844          |
| 0.001555 | 0.002324 | 0.01443  | 0.000333 | 0.007362 | 0.003973 | 0.003653 | 0.006298 | 0.000803 | 0.008558 | 0.002706 | 0.00885  | 0.002597 | 0.007007 | 0.000394          |
| 0.002537 | 0.000403 | 0.009052 | 0.00067  | 0.001948 | 0.000361 | 0        | 0.003971 | 0.000285 | 0.000923 | 0.000593 | 0.000761 | 0.010986 | 0.000439 | 0.00141           |
| 0.001414 | 0.002166 | 0.009481 | 0.006779 | 0.001254 | 0.001012 | 0.000146 | 0.019332 | 0.003075 | 0.002395 | 5.98E-05 | 0.006924 | 0        | 0.000386 | 0.000786          |
| 0.000499 | 0.000761 | 0.001978 | 0.003464 | 0.011516 | 0.000684 | 3.90E-05 | 0.000756 | 0        | 0.001356 | 0.00012  | 0.001535 | 0        | 0.006773 | 0                 |
| 0.006297 | 0.007749 | 0.024896 | 0.035768 | 0.148023 | 0.028101 | 0.003199 | 0.038605 | 0.007928 | 0.054441 | 0.00177  | 0.030926 | 0.006781 | 0.175122 | 0                 |
| 0.007578 | 0.005758 | 0.028392 | 0.043386 | 0.189531 | 0.040057 | 0.005281 | 0.044133 | 0.007283 | 0.098669 | 0.00295  | 0.04498  | 0.004452 | 0.237485 | 0.000247          |
| 0.000433 | 9.44E-05 | 0.003747 | 0.0003   | 0.004875 | 0.001861 | 8.98E-05 | 0.000756 | 0        | 0.000379 | 0.000983 | 0.001411 | 0.001422 | 0.00017  | 0.000516          |
| 0.000482 | 7.08E-05 | 0.005678 | 0.000248 | 0.003785 | 0.002484 | 3.32E-05 | 0.002313 | 0.000152 | 0.000624 | 0.002084 | 0.001328 | 0.001711 | 0.002515 | 0.001459          |
| 0.000832 | 0.001181 | 0.001332 | 0.000768 | 0.00297  | 0.000587 | 0.000829 | 0        | 0        | 0.000312 | 0.000505 | 0.000263 | 0        | 0        | 0.000379          |
| 0.000216 | 0.000151 | 0.000494 | 0        | 0        | 7.82E-05 | 0        | 0        | 0        | 0        | 0        | 0        | 0        | 0        | 0.000122          |
| 0.000907 | 0.000572 | 0.000854 | 0        | 0.000329 | 0.000416 | 4.68E-05 | 0        | 0        | 0        | 0.000152 | 0        | 0        | 0        | 0.000477          |
| 0.419285 | 0.082258 | 0.104595 | 0.055737 | 0.034424 | 0.239194 | 0.236193 | 0.022372 | 0.000155 | 0.017209 | 0.046062 | 0.084387 | 0.233722 | 0.022202 | 0.20948           |
|          | 0        | 0        | 0        | 0        | 0        | 0        | 0        | 0        | 0.000571 | 0        | 0.00012  | 0        | 0        | 0                 |
| 0.001015 | 0        | 0.000273 | 6.24E-05 | 0.000174 | 0.001872 | 0.001202 | 0        | 0.000127 | 0.000388 | 0.006384 | 0.001263 | 0        | 0.001649 | 0.000502          |
| 0.000233 | 0        | 0        | 0        | 0        | 0        | 0.000137 | 0        | 0        | 9.81E-05 | 0.000321 | 0.000115 | 0.002288 | 0        | 0.000475          |
| 0.005282 | 0        | 0.000234 | 0.000283 | 0.000121 | 0.000528 | 0.001489 | 0        | 0.000681 | 0.000441 | 0.003232 | 0.000682 | 0.005277 | 0.001134 | 0.005815          |
|          | 0        | 0        | 0        | 0        | 0        | 4.44E-05 | 0        | 0        | 0        | 0        | 5.73E-05 | 0        | 0        | 0.000137          |
|          | 0        | 0        | 0        | 7.29E-05 | 0.000627 | 0.00023  | 0.000197 | 0.000887 | 0        | 0.000843 | 0.000187 | 0.000479 | 0        | 0.000193 0        |
|          | 0        | 0        | 0        | 0        | 0        | 0.000377 | 0        | 0        | 0.000709 | 5.98E-05 | 0        | 0        | 0        | 0                 |
|          | 0        | 0        | 0        | 0        | 0.000144 | 3.80E-05 | 0        | 0        | 0        | 0        | 0        | 0        | 0        | 0                 |
| 0.000457 | 0.0023   | 0.000317 | 0.000495 | 0.000432 | 4.44E-05 | 0.002022 | 0.000698 | 0.000573 | 0.000187 | 0.001596 | 0.000977 | 0.012512 | 0        | 0.00012           |
|          | 0        | 0        | 0        | 0        | 0        | 0        | 0        | 0        | 0        | 0        | 0        | 0        | 0        | 0                 |
| 0.001963 | 0        | 0.000824 | 0        | 0.000144 | 0.000283 | 0.002543 | 0        | 0        | 0        | 0.001663 | 0.000364 | 0        | 0        | 0.001275          |
|          | 0        | 0        | 0        | 0        | 0        | 4.22E-05 | 0        | 0        | 0        | 0        | 5.73E-05 | 9.68E-05 | 0        | 0 0.000377        |
| 0.003851 | 0        | 0.000269 | 6.24E-05 | 0.000902 | 0        | 0.00018  | 0.001222 | 0        | 9.36E-05 | 4.48E-05 | 0.000544 | 0.000804 | 0.00042  | 0.000375          |

|          |          |          |          |          |          |          |          |          |          |          |          |          |          |          |
|----------|----------|----------|----------|----------|----------|----------|----------|----------|----------|----------|----------|----------|----------|----------|
| 0.001048 | 0        | 0.000243 | 0        | 0.000295 | 0.000173 | 0.000347 | 0.00128  | 0        | 8.47E-05 | 0.000281 | 9.22E-05 | 0        | 0        | 0.000272 |
| 0.000191 | 0        | 0        | 0        | 0.000305 | 0.000154 | 0        | 0        | 0        | 0        | 0.000453 | 0        | 0.000701 | 0        | 0.00056  |
| 0        | 0        | 0        | 0        | 0.000137 | 4.44E-05 | 4.88E-05 | 0        | 0        | 0        | 0.000244 | 0.000336 | 0        | 0.000529 | 0.001109 |
| 0.001156 | 0.00472  | 0.001605 | 0.001136 | 0.000148 | 0.001692 | 9.37E-05 | 0.006851 | 0        | 9.81E-05 | 0.000969 | 0.000516 | 0.000804 | 0        | 0.00074  |
| 0        | 0.000936 | 0.000807 | 0.006188 | 0.000151 | 0.001829 | 0.000141 | 0.003142 | 0        | 0.000192 | 0.001643 | 0        | 0.001731 | 0.001547 | 0.000383 |
| 0.001323 | 0.001374 | 0.001427 | 0.001782 | 0.000268 | 0.001521 | 0.000189 | 0.002764 | 0        | 0.000161 | 0.001173 | 0.000539 | 0.000577 | 0.000374 | 0.000487 |
| 0.001264 | 0.011066 | 0.000512 | 0.00884  | 0        | 0.000161 | 3.51E-05 | 0.001906 | 0.000299 | 0        | 0.001586 | 0.000101 | 0.000907 | 0        | 0.005893 |
| 0.001431 | 0.025967 | 0.003184 | 0.017805 | 0        | 0.000634 | 0.000322 | 0.002822 | 0.000515 | 8.47E-05 | 0.002438 | 0.000438 | 0        | 0        | 0.016965 |
| 0.001348 | 0.000635 | 0        | 0.002109 | 0        | 0.001667 | 0.000158 | 0.001338 | 0        | 0        | 0.004205 | 0.000429 | 0        | 0        | 0.000609 |
| 0.210898 | 0.184625 | 0.028019 | 0.471485 | 0.002534 | 0.190645 | 0.03977  | 0.25236  | 0.00013  | 0.013619 | 0.302776 | 0.015451 | 0.135793 | 0.021952 | 0.12953  |
| 0.014889 | 0.007057 | 0.002628 | 0.030023 | 0.001113 | 0.016217 | 0.001797 | 0.013542 | 0        | 0.001788 | 0.033277 | 0.002982 | 0.016407 | 0.002235 | 0.012379 |
| 0        | 0.00148  | 0.000794 | 3.95E-05 | 0        | 5.28E-05 | 0        | 0        | 0        | 0        | 0.000117 | 0        | 0        | 0        | 0.000122 |
| 0.000907 | 0.002367 | 0.000494 | 0.000547 | 0        | 9.51E-05 | 0.000158 | 0        | 0        | 0        | 0.000202 | 0.000267 | 0.00066  | 0        | 0.003771 |
| 0.014124 | 0.08216  | 0.03721  | 0.032435 | 0.000999 | 0.002573 | 0.027177 | 0.00608  | 0.183638 | 0.004798 | 0.023071 | 0.026514 | 0.013315 | 0.004859 | 0.08603  |
| 0.040077 | 0.327615 | 0.145769 | 0.138219 | 0.00239  | 0.012603 | 0.140979 | 0.023666 | 0.595982 | 0.020232 | 0.085297 | 0.08707  | 0.032196 | 0.015694 | 0.315226 |
| 0        | 0.000737 | 0.002633 | 0.002492 | 0.000151 | 0.000334 | 0.000164 | 0        | 0.018058 | 5.80E-05 | 0.000558 | 0.000793 | 0.001896 | 0.000745 | 0.000222 |
| 0.000225 | 0.011913 | 0.002407 | 0.003863 | 0        | 6.34E-05 | 0.000183 | 0.001266 | 0.007078 | 0.000187 | 0.000251 | 0.000313 | 0.000886 | 0        | 0.004921 |
| 0.001572 | 0.001476 | 0.001067 | 0.001193 | 0        | 0        | 0        | 0.004771 | 0.006014 | 0        | 6.97E-05 | 0.00083  | 0.005813 | 0        | 0.003167 |
| 0.003568 | 0        | 0        | 0.000148 | 0        | 0        | 0        | 0        | 0        | 0        | 4.73E-05 | 0        | 0.0054   | 0.000197 | 0.000365 |
| 0.019098 | 0.001119 | 0.007478 | 0.001913 | 0        | 0.000934 | 0.000164 | 0.104019 | 0.020399 | 8.47E-05 | 0.001452 | 0.001636 | 0.040503 | 0.009492 | 0.002208 |
| 0.048819 | 9.44E-05 | 0.009317 | 0.003693 | 0        | 0.000133 | 0.00024  | 0.010328 | 0.0069   | 0        | 0.001066 | 8.76E-05 | 0.072679 | 0.001452 | 0.028474 |
| 0.019024 | 0.003863 | 0.008367 | 0.008059 | 0        | 0.000275 | 0.000299 | 0.019695 | 0.06813  | 9.81E-05 | 0.001499 | 0.000853 | 0.026569 | 0.002133 | 0.021239 |
| 0.001963 | 0.000108 | 0.002897 | 0.000219 | 0.000121 | 3.59E-05 | 0        | 0.00528  | 0        | 0.000272 | 6.22E-05 | 0.002346 | 0.018015 | 0        | 0.001117 |
| 0.000982 | 0.000796 | 0.000525 | 0.000989 | 0        | 0        | 0        | 0.007055 | 0        | 0.000111 | 0.000105 | 0.000106 | 0.007338 | 0        | 0.001242 |
| 0.011038 | 0.002369 | 0.002672 | 0.005574 | 0.000161 | 0.000353 | 0        | 0.023361 | 0.000158 | 0.000361 | 0.000842 | 0.000443 | 0.036298 | 0.000174 | 0.0024   |
| 0.001372 | 0.00141  | 0.009069 | 0.001484 | 0        | 0.001382 | 0.00081  | 0.000538 | 0        | 0.000384 | 0.000234 | 0.001586 | 0        | 0.000488 | 0.001302 |
| 0.005124 | 0.001087 | 0.002412 | 0.000293 | 0.000352 | 0.000372 | 0        | 0.002473 | 0        | 0        | 9.96E-05 | 0.001254 | 0.012553 | 0.000204 | 0.001542 |
| 0.000449 | 0.0009   | 0.004225 | 0.000845 | 0.001435 | 0.002514 | 0.000103 | 0.000756 | 0        | 0.000169 | 0.000314 | 0.000765 | 0.008595 | 0.00287  | 0.000516 |
| 0.000416 | 0.000338 | 0.002173 | 0.000256 | 0.004006 | 0.001633 | 0.000111 | 0.001935 | 0.000127 | 0.000263 | 5.98E-05 | 0.000968 | 0.001443 | 0.001119 | 0        |
| 0.001955 | 0.00021  | 0.001067 | 0.001703 | 0.008026 | 0.016333 | 0.003802 | 0.004175 | 0        | 0.00755  | 0.000842 | 0.006712 | 0.000763 | 0.004961 | 0.00176  |
| 0.000848 | 0.000712 | 0.00082  | 0.000335 | 0.000727 | 0.003997 | 0.000732 | 0        | 0        | 0.002372 | 0        | 0.000876 | 0.00066  | 0.000926 | 0.000259 |
| 0.009233 | 0.000218 | 0.000759 | 0.006532 | 0        | 0.002774 | 0.001501 | 0.000596 | 0        | 0.000482 | 0.015532 | 0.038412 | 0.006452 | 0.000458 | 0.008814 |
| 0.000216 | 0        | 0.000334 | 0.000194 | 0.010879 | 5.91E-05 | 0.007991 | 0.001542 | 0        | 0.005177 | 0.003063 | 0.003042 | 0        | 0        | 0.000893 |
| 0.003885 | 0.00081  | 0        | 0.010045 | 0.000949 | 0.025617 | 0.00404  | 0.003506 | 0        | 0.003862 | 0.020775 | 0.001959 | 0.001587 | 0        | 0.024361 |

| HC080    | HC081    | HC082    | HC083    | HC084    | HC085    | HC086    | HC087    | HC088    | HC110    | HC090    | HC091    | HC093    | HC111    | HC117    |          |
|----------|----------|----------|----------|----------|----------|----------|----------|----------|----------|----------|----------|----------|----------|----------|----------|
|          | 0        | 0.001169 | 0        | 0        | 0        | 0        | 0        | 0        | 0        | 0        | 0.000269 | 0        | 0        | 0.000135 |          |
|          | 0        | 0.00118  | 0        | 0        | 0        | 0        | 0        | 0        | 0        | 0        | 0        | 0        | 0        | 0.001151 |          |
|          | 0        | 0.0126   | 0        | 4.45E-05 | 0        | 5.03E-05 | 0        | 0        | 0.000317 | 0        | 0        | 0.001248 | 0        | 0.000286 | 0.043544 |
|          | 0        | 0.001855 | 0        | 0        | 0        | 5.49E-05 | 0        | 0        | 0        | 0        | 0.000125 | 0.002691 | 0        | 0.000167 | 0.005902 |
|          | 0        | 0.048803 | 0        | 4.10E-05 | 0        | 0        | 0        | 0        | 0        | 0        | 0.000111 | 0.004156 | 0        | 0.00029  | 0.019914 |
|          | 0        | 0.006912 | 0        | 0.000145 | 0        | 0.000242 | 0        | 0.000418 | 0.000252 | 0        | 0.004102 | 0.000224 | 0.000694 | 0.00165  | 0.007171 |
|          | 0        | 0        | 0        | 5.47E-05 | 6.32E-05 | 0.000345 | 6.27E-05 | 0        | 0        | 0.000115 | 0.000348 | 0.000777 | 0        | 0.000549 | 0.001251 |
| 0.000152 | 0.012825 | 0        | 0.002247 | 0.00317  | 0.001464 | 0.00096  | 0.000462 | 0.001158 | 0.001665 | 0.001147 | 0.016162 | 0.000412 | 0.004765 | 0.005929 |          |
| 0.067945 | 0.031539 | 0.007559 | 0.011695 | 0.014529 | 0.027288 | 0.005154 | 0.00017  | 0.011042 | 0.002587 | 0.037242 | 0.040832 | 0.104542 | 0.027802 | 0.040342 |          |
| 0.027567 | 0.022772 | 0.003539 | 0.015976 | 0.006102 | 0.01478  | 0.010884 | 0.00166  | 0.005155 | 0.000378 | 0.019685 | 0.009509 | 0.003553 | 0.045889 | 0.057014 |          |
| 0.001338 | 0        | 0.000201 | 0.000573 | 0        | 0.000897 | 0.000608 | 0.000575 | 0.001516 | 0        | 0.009171 | 0.00228  | 0.000866 | 0.00424  | 0.002899 |          |
| 0.000211 | 0        | 8.78E-05 | 0        | 0.000268 | 0.000554 | 6.43E-05 | 3.40E-05 | 0.001201 | 0        | 0.000202 | 0.001174 | 0.002026 | 0.001823 | 0.000935 |          |
| 0.000672 | 0.00562  | 0.000474 | 0.000378 | 0.002195 | 0.000746 | 0.000552 | 0.004326 | 0.005719 | 0.000901 | 0.000257 | 0.00308  | 0.001083 | 0.001919 | 0.003369 |          |
| 0.001143 | 0.028302 | 0.000316 | 0.000236 | 0.00172  | 0.003578 | 0.000668 | 0.000214 | 0.001124 | 0.001037 | 0.000876 | 0.004037 | 0.009406 | 0.001118 | 0.007374 |          |
| 0.020785 | 0.098438 | 0.003879 | 0.005449 | 0.033945 | 0.034769 | 0.009185 | 0.025007 | 0.024939 | 0.017886 | 0.009373 | 0.012402 | 0.060009 | 0.021585 | 0.029555 |          |
| 0        | 0        | 0        | 0        | 0        | 0        | 0        | 0        | 0.014394 | 0.050605 | 0        | 0        | 0        | 0        | 0.012389 | 0.019033 |
| 7.40E-05 | 0        | 0.000429 | 0        | 0        | 3.43E-05 | 0.000115 | 0.000162 | 7.21E-05 | 0        | 9.04E-05 | 0.001099 | 0        | 0.000256 | 0        | 0        |
| 0.04272  | 0.017669 | 0.006855 | 0.000831 | 0.042883 | 0.051584 | 0.057318 | 0.002369 | 0.009606 | 0.013472 | 0.073059 | 0.011909 | 0.027295 | 0.070865 | 0.019489 |          |
| 0.000401 | 0.005373 | 0        | 0.000125 | 0.000569 | 0.000329 | 0        | 0        | 0.001348 | 0        | 0        | 0        | 0        | 0.000685 | 0.000266 |          |
| 0.004318 | 0.039732 | 0.000268 | 0.002665 | 0.007791 | 0.004797 | 0        | 0.000388 | 0.005568 | 0        | 9.73E-05 | 0.000172 | 7.17E-05 | 0.005446 | 0.000759 |          |
| 0.002154 | 0.003248 | 0.008282 | 0.020531 | 0.016258 | 0.020657 | 0.003685 | 0.00677  | 0.031746 | 0.022738 | 0.004075 | 0.01294  | 0.002006 | 0.004775 | 0.001011 |          |
| 9.64E-05 | 0        | 0.000101 | 9.75E-05 | 0.000698 | 6.41E-05 | 0.000155 | 0        | 0.000113 | 0        | 0.000139 | 0.001002 | 0.002292 | 0.000153 | 0        | 0        |
| 8.74E-05 | 0.007969 | 0.797051 | 0.000559 | 0.01187  | 0.005156 | 0.000417 | 0        | 0        | 0.006832 | 0.000932 | 0.001002 | 0.001565 | 0        | 0        | 0        |
| 0.015839 | 0.023783 | 0.005644 | 0.052024 | 0.234838 | 0.123551 | 0.031122 | 0.000245 | 0.00361  | 0.057287 | 0.012599 | 0.091314 | 0.109983 | 0.012256 | 0.004132 |          |
| 0.001239 | 0.027987 | 8.46E-05 | 0.006624 | 0.027576 | 0.009313 | 0.002699 | 0.000444 | 0.001223 | 0.077518 | 0.012356 | 0.007909 | 0.003596 | 0.005668 | 0.001237 |          |
| 0.000238 | 0.012622 | 0        | 0.007354 | 0.013121 | 0.003127 | 0.001837 | 0.00047  | 0.000718 | 0.028346 | 0.004408 | 0.010159 | 0.002    | 0.002693 | 0.003143 |          |
| 0.000208 | 0.004035 | 0        | 0.000937 | 0.00276  | 0.001908 | 0.000257 | 0        | 0        | 0.004253 | 0.000508 | 0.002078 | 0.000282 | 0        | 0.001192 |          |
| 0.001533 | 0.011285 | 0.001194 | 0.006479 | 0.021472 | 0.007403 | 0.000999 | 0.002053 | 0.008547 | 0.039906 | 0.004568 | 0.010361 | 0.00699  | 0.002958 | 0.010675 |          |
| 0.002732 | 0.035574 | 0.001802 | 0.01767  | 0.041172 | 0.014483 | 0.004992 | 0.000784 | 0.005933 | 0.042472 | 0.021507 | 0.017149 | 0.028319 | 0.013258 | 0.019544 |          |
| 0.009128 | 0.171294 | 0.012804 | 0.033458 | 0.24759  | 0.068323 | 0.009042 | 0.011307 | 0.06626  | 0.207369 | 0.070583 | 0.121351 | 0.080319 | 0.059792 | 0.132506 |          |
| 0.001307 | 0.012521 | 0.003988 | 0.003771 | 0.029394 | 0.021675 | 0.002069 | 0.000441 | 0.009743 | 0.033886 | 0.006467 | 0.015332 | 0.005323 | 0.003749 | 0.028972 |          |
| 0.000681 | 0.009509 | 0.000393 | 0.001127 | 0.008489 | 0.010221 | 0.000209 | 0.000252 | 0.002246 | 0.006211 | 0.003525 | 0.009673 | 0.008445 | 0.001915 | 0.009103 |          |
| 0.00058  | 0.003866 | 0        | 0.001295 | 0.000521 | 0.000622 | 0.000229 | 0        | 0        | 0.000578 | 0.006689 | 0.007961 | 0.000581 | 0.001789 | 0.000284 |          |
| 0.000509 | 0.02194  | 0        | 0.000859 | 0.001295 | 0.001972 | 0.001151 | 5.17E-05 | 5.52E-05 | 0.000777 | 0.002121 | 0.009359 | 0.000848 | 0.0035   | 0.002587 |          |
| 0        | 0.000674 | 0        | 0        | 0.002398 | 0.004609 | 0.000907 | 0        | 0        | 0.004763 | 0.000591 | 0.001219 | 5.38E-05 | 0.000116 | 0        | 0        |
| 0.000789 | 0.033641 | 6.86E-05 | 0.000118 | 0.060945 | 0.145848 | 0.013515 | 0        | 0.000994 | 0.151493 | 0.002816 | 0.046543 | 0.009687 | 0.010893 | 0.001418 |          |
| 0.001555 | 0.032517 | 0.000279 | 0.000595 | 0.064148 | 0.215506 | 0.014811 | 0.000199 | 0.002107 | 0.121626 | 0.002879 | 0.049272 | 0.017259 | 0.009066 | 0.003865 |          |
| 0.001177 | 0.003136 | 0        | 0.001401 | 0.00048  | 0.000876 | 0.000394 | 0.000109 | 7.69E-05 | 0        | 0.001321 | 0.001241 | 0.000154 | 0.001977 | 0.001897 |          |
| 0.000746 | 0.004485 | 5.43E-05 | 0.003441 | 0.000554 | 0.000647 | 0.000844 | 6.94E-05 | 8.17E-05 | 0.000127 | 0.001815 | 0.001361 | 0.00022  | 0.002253 | 0.001495 |          |
| 0.000417 | 0.002529 | 0.000969 | 9.58E-05 | 0.000231 | 9.38E-05 | 0.000594 | 0.002576 | 0.002176 | 0        | 0.020332 | 0        | 0.000174 | 0.016735 | 0.012955 |          |
| 0        | 0.000663 | 0        | 0        | 0        | 0        | 4.78E-05 | 0.000259 | 0        | 0        | 0.004214 | 0        | 0        | 0.001401 | 0        | 0        |
| 0.000249 | 0.000641 | 0        | 7.87E-05 | 0        | 0        | 0        | 0.001378 | 0.000336 | 0        | 0.006042 | 0        | 0        | 0.003463 | 0.00168  |          |
| 0.193082 | 0.086108 | 0.066919 | 0.01867  | 0.011189 | 0.051141 | 0.053958 | 0.328359 | 0.202183 | 0.026936 | 0.388218 | 0.090425 | 0.375814 | 0.309883 | 0.21348  |          |
| 0        | 0        | 0        | 0        | 0        | 0        | 0        | 0        | 0        | 0.000353 | 0        | 0        | 0        | 0        | 0        | 0        |
| 0.000493 | 0        | 0.000654 | 9.06E-05 | 0.000349 | 0.000428 | 0.000246 | 0.00229  | 0.00583  | 0.001402 | 0.000834 | 0        | 0.001491 | 0.001121 | 0.000375 |          |
| 0        | 0        | 0        | 7.53E-05 | 0        | 0        | 0        | 4.77E-05 | 0.005602 | 0        | 0        | 0        | 0.000287 | 0        | 0        | 0        |
| 7.84E-05 | 0        | 0.000287 | 0.001117 | 0        | 0.0003   | 0.000419 | 0.000771 | 0.03256  | 0.000178 | 0        | 0.000172 | 0.002392 | 0        | 0.000718 |          |
| 0        | 0        | 0        | 0        | 0        | 0        | 0        | 0        | 0        | 0        | 0        | 0        | 0        | 0        | 0        | 0        |
| 5.38E-05 | 0.005867 | 0.000118 | 0        | 0        | 0        | 0        | 8.85E-05 | 0.000159 | 0        | 0.005333 | 0        | 0.000218 | 0.001128 | 0.003694 |          |
| 0        | 0        | 0        | 0        | 0        | 0        | 0        | 0        | 0.000185 | 0        | 0.000111 | 0        | 0        | 0.000201 | 0.000289 |          |
| 0        | 0        | 0        | 0        | 0        | 0        | 0        | 0        | 0.000262 | 0        | 0        | 0        | 0        | 0        | 0        | 0        |
| 0        | 0        | 0.000126 | 0.000246 | 0.000944 | 0.000201 | 6.10E-05 | 0.000101 | 0.001184 | 0.000208 | 0.000341 | 0        | 0.002674 | 0.000648 | 0        | 0        |
| 0        | 0        | 0        | 0        | 0        | 0        | 0        | 0        | 0        | 0        | 0        | 0        | 0        | 0        | 0        | 0        |
| 0.000569 | 0        | 0.000405 | 0.000135 | 0.000166 | 0.000222 | 0.000242 | 2.86E-05 | 0.003478 | 0        | 0.009102 | 0        | 0        | 0.002573 | 0.008598 |          |
| 0        | 0        | 0        | 0        | 0        | 0        | 0        | 0        | 0.007005 | 9.77E-05 | 0        | 0        | 8.71E-05 | 0        | 0.000903 |          |
| 0.000805 | 0.006778 | 0        | 0        | 0        | 9.61E-05 | 5.77E-05 | 3.81E-05 | 0.000877 | 0.000693 | 0.000668 | 0        | 0.00115  | 0.000262 | 0.000944 |          |

|          |          |          |          |          |          |          |          |          |          |          |          |          |          |          |
|----------|----------|----------|----------|----------|----------|----------|----------|----------|----------|----------|----------|----------|----------|----------|
| 0        | 0        | 0        | 0        | 0        | 7.78E-05 | 0        | 3.54E-05 | 0.000144 | 0        | 0.001252 | 0        | 0        | 0.001455 | 0.02559  |
| 7.17E-05 | 0        | 0        | 0.000258 | 0        | 0.000172 | 6.60E-05 | 0.000116 | 0.001273 | 0        | 0.00082  | 0.00062  | 0        | 0.001097 | 0.013461 |
| 0        | 0.00635  | 3.19E-05 | 5.30E-05 | 0        | 0.000167 | 0.00049  | 0        | 0.000324 | 0        | 0.000285 | 0        | 7.43E-05 | 0.002174 | 0.038378 |
| 0.000818 | 0        | 0        | 0.005798 | 0.002962 | 0.000361 | 0.002287 | 0.000505 | 0.00025  | 0.00065  | 0.000987 | 0.000209 | 0        | 0.000375 | 0.001833 |
| 0.002752 | 0        | 0        | 0.003826 | 0.001035 | 0.000236 | 0.004082 | 0.001232 | 0.00037  | 0.001105 | 0.001154 | 0        | 0.000131 | 0.000429 | 0.00014  |
| 0.001401 | 0        | 0        | 0.005531 | 0.001785 | 9.15E-05 | 0.002166 | 0.000541 | 0.000132 | 0.000527 | 0.000223 | 0.000389 | 8.45E-05 | 0.000995 | 0.000664 |
| 0.000589 | 0        | 0        | 0.007599 | 0.001297 | 0.000439 | 0.00662  | 0.005587 | 0.000776 | 0.000208 | 0.000695 | 0        | 0.000126 | 0.001578 | 0.000298 |
| 0.001679 | 0        | 3.67E-05 | 0.013544 | 0.000342 | 0.000208 | 0.015454 | 0.011461 | 0.001312 | 0.000136 | 0.000619 | 0.000486 | 0        | 0.002004 | 0        |
| 0.004043 | 0        | 8.14E-05 | 0.004264 | 0.000135 | 0.000112 | 0.002481 | 0.002153 | 0.001127 | 0        | 0        | 0        | 7.17E-05 | 0.000569 | 0.001183 |
| 0.481866 | 0.011678 | 0.050022 | 0.556467 | 0.052793 | 0.015274 | 0.570589 | 0.283603 | 0.179961 | 0.018311 | 0.040906 | 0.005547 | 0.010451 | 0.080187 | 0.116056 |
| 0.034995 | 0.001315 | 0.001631 | 0.055208 | 0.005129 | 0.001391 | 0.031956 | 0.038061 | 0.014557 | 0.001988 | 0.002788 | 0.000404 | 0.002029 | 0.00893  | 0.015529 |
| 6.27E-05 | 0        | 0        | 0.000164 | 0        | 4.58E-05 | 0        | 0.000956 | 0.00013  | 0        | 0.00057  | 0        | 0        | 0.000443 | 0        |
| 0.000173 | 0.000708 | 0        | 0.000313 | 0.000192 | 0.000487 | 0.000284 | 0.002322 | 0.000137 | 0        | 0.000987 | 0.000792 | 0        | 0.001667 | 0.000172 |
| 0.002916 | 0.01387  | 0.002898 | 0.02011  | 0.00332  | 0.022764 | 0.022718 | 0.043759 | 0.050302 | 0.016794 | 0.009623 | 0.046386 | 0.006539 | 0.027822 | 0.003694 |
| 0.014358 | 0.042453 | 0.011629 | 0.073589 | 0.009905 | 0.096503 | 0.084328 | 0.180573 | 0.178464 | 0.063502 | 0.029621 | 0.231922 | 0.045722 | 0.103432 | 0.015629 |
| 8.52E-05 | 0.001225 | 0        | 0.00065  | 0.002237 | 0.001119 | 0.000668 | 0.000455 | 0        | 0.004418 | 0.000973 | 0.000733 | 0        | 0.000556 | 0        |
| 0.000137 | 0.001281 | 0        | 0.0022   | 0.000148 | 0.000725 | 0.000704 | 0.000508 | 0.000247 | 0.000433 | 9.04E-05 | 0.009397 | 0        | 0.001258 | 0.000158 |
| 0.000213 | 0        | 0        | 0.000452 | 0        | 0.000469 | 0.000839 | 0        | 6.97E-05 | 0.000119 | 0.002747 | 0.007849 | 0.000133 | 0.001203 | 0        |
| 0.00037  | 0.00054  | 0        | 0        | 0        | 0        | 9.23E-05 | 0.000106 | 6.01E-05 | 8.92E-05 | 0.0013   | 0.000598 | 0.00012  | 0.000658 | 0.000154 |
| 0.001385 | 0.026739 | 0        | 0.001396 | 0.001676 | 0.000309 | 0.002597 | 0.000161 | 0.001857 | 0.009075 | 0.025679 | 0.030119 | 0.003396 | 0.006466 | 0.003721 |
| 0.000311 | 0.013297 | 2.71E-05 | 0.000626 | 0.000159 | 9.84E-05 | 0.006635 | 0.000225 | 0.000322 | 0.003484 | 0.002823 | 0.001547 | 9.99E-05 | 0.003033 | 0        |
| 0.001259 | 0.004181 | 0        | 0.001151 | 0.000447 | 0.000247 | 0.003332 | 0.001894 | 0.006887 | 0.003297 | 0.015923 | 0.031278 | 0.000927 | 0.007583 | 0.00075  |
| 0.000896 | 0.001191 | 0        | 8.04E-05 | 0.000824 | 0.000952 | 0.001209 | 0        | 0.000132 | 0        | 0.009568 | 0.000583 | 0.000138 | 0.003838 | 0.000253 |
| 0.000993 | 0        | 2.71E-05 | 0.000888 | 9.16E-05 | 0        | 0.000932 | 0        | 0.000132 | 0        | 0.002448 | 0.000112 | 0        | 0.000985 | 0.001075 |
| 0.012384 | 0        | 0        | 0.003906 | 0.000632 | 0.000169 | 0.00365  | 3.40E-05 | 0.000303 | 9.77E-05 | 0.007065 | 0.00145  | 0.000138 | 0.002362 | 0.003021 |
| 0.001033 | 0.012004 | 0        | 0.001296 | 0.001718 | 0.002217 | 0.001044 | 0.000884 | 0.000521 | 0.000106 | 0.001683 | 0.003155 | 0.000126 | 0.003275 | 0.00298  |
| 0.001481 | 0.000573 | 0        | 0.000168 | 0        | 0.000592 | 0.000308 | 6.13E-05 | 0.000187 | 0.000102 | 0.013281 | 0.004209 | 0.001201 | 0.004758 | 0.001386 |
| 0.000769 | 0.002001 | 2.87E-05 | 0.000366 | 0.000364 | 0.000448 | 0.000681 | 0.001114 | 0.000516 | 0.001704 | 0.005048 | 0.000254 | 0.000791 | 0.002137 | 0.000135 |
| 0.00061  | 0.001259 | 0        | 0.000727 | 0.000643 | 0.000842 | 0.000102 | 0        | 6.49E-05 | 0        | 0.002086 | 0        | 0.00064  | 0.000484 | 0        |
| 0.001696 | 0.001248 | 0.000367 | 0.000103 | 0.000229 | 0.000366 | 0.000185 | 0.003162 | 0.004538 | 0.000115 | 0.004436 | 0.001114 | 0.044395 | 0.003504 | 0.004927 |
| 0.00022  | 0.000629 | 3.19E-05 | 0.000221 | 0        | 0.000302 | 0.000193 | 0.000719 | 0.000363 | 0        | 0.00137  | 0.000194 | 0.007095 | 0.001401 | 0.001549 |
| 0.007189 | 0        | 0.006304 | 0.002625 | 0.000105 | 0.00178  | 0.002617 | 0.007438 | 0.022123 | 0        | 0.061732 | 0        | 0.000128 | 0.045961 | 0.004538 |
| 6.95E-05 | 0        | 0.001237 | 0.000393 | 0        | 0        | 0        | 0.0015   | 0.003401 | 0        | 0.000236 | 0.000598 | 0.000487 | 0        | 0.000235 |
| 0.019506 | 0        | 0.000819 | 0.016717 | 0.000142 | 0.001082 | 0.000162 | 0.001528 | 0.013752 | 0        | 0        | 0.000209 | 0.000786 | 0.001428 | 0.009763 |

| HC113    | HC134    | HC135    | HC136    | HC137    | HC138    | HC139    | HC140    | HC141    | HC142    | HC143    | HC144    | HC145    | HC146    | HC147    |
|----------|----------|----------|----------|----------|----------|----------|----------|----------|----------|----------|----------|----------|----------|----------|
| 0        | 0        | 0        | 9.46E-05 | 0        | 0        | 0        | 0        | 0        | 0        | 0        | 0        | 0        | 0        | 0        |
| 0        | 0        | 0        | 0        | 0.000288 | 0        | 0        | 0        | 0        | 0        | 0        | 0        | 0        | 0        | 0        |
| 0.000125 | 0.001398 | 0.00075  | 0.00427  | 0.014014 | 0        | 0        | 3.95E-05 | 0        | 0.000508 | 0        | 0.000315 | 0        | 0        | 2.94E-05 |
| 4.07E-05 | 5.85E-05 | 4.63E-05 | 0.001845 | 0.004145 | 0        | 0        | 0        | 0        | 0.000829 | 0        | 0.000318 | 0        | 0        | 0        |
| 0        | 0.000194 | 5.87E-05 | 0.00317  | 0.007535 | 0        | 0        | 4.81E-05 | 0        | 0.000593 | 0        | 0        | 0        | 0        | 0        |
| 0.000484 | 0.000209 | 0.000624 | 0.000122 | 0.00263  | 0.000291 | 3.55E-05 | 0.000368 | 0        | 0.002347 | 0        | 0.000404 | 0        | 0        | 4.14E-05 |
| 3.62E-05 | 8.62E-05 | 0        | 9.86E-05 | 0.00051  | 0        | 0        | 4.47E-05 | 0        | 0.000647 | 0        | 0.000278 | 0        | 0        | 0        |
| 0.000584 | 0.000896 | 0.001235 | 0.000722 | 0.003355 | 0.000631 | 0.000157 | 0.000919 | 8.18E-05 | 0.00366  | 0.000286 | 0.008323 | 0.002505 | 3.30E-05 | 0.001012 |
| 0.009624 | 0.009048 | 0.005719 | 0.018529 | 0.068521 | 0.018157 | 0.002445 | 0.004173 | 0        | 0.018014 | 0.010663 | 0.016505 | 0.031335 | 0.074554 | 0.0184   |
| 0.006106 | 0.010157 | 0.012602 | 0.012377 | 0.022445 | 0.007611 | 0.00645  | 0.007718 | 0        | 0.029217 | 0.014987 | 0.025875 | 0.012345 | 0.001982 | 0.004992 |
| 0.000908 | 0.001269 | 0.004586 | 0.003628 | 0.002704 | 0.002588 | 0.000895 | 0.001515 | 0.000269 | 0.002958 | 0.001837 | 0.001544 | 0.003186 | 0.000993 | 0.001818 |
| 0.000609 | 0.000302 | 0.0005   | 0.000733 | 0.000857 | 0.000337 | 5.18E-05 | 0.000103 | 0        | 0        | 0.000149 | 9.26E-05 | 0.001063 | 0.000644 | 0.000157 |
| 0.002705 | 0.001783 | 0.003943 | 0.001025 | 0.000725 | 0.001027 | 0.00113  | 0.000646 | 0.000269 | 0.002819 | 0.001257 | 0.000492 | 0.000674 | 0.000142 | 0.000378 |
| 0.001619 | 0.000736 | 0.001575 | 0.000615 | 0.001574 | 6.05E-05 | 0.000167 | 0.000132 | 0        | 0.001597 | 0.001252 | 0.001444 | 0.000643 | 0.000304 | 0.000544 |
| 0.032661 | 0.007801 | 0.042043 | 0.005083 | 0.009674 | 0.004542 | 0.00436  | 0.005288 | 0.001228 | 0.014258 | 0.018377 | 0.017711 | 0.008125 | 0.002265 | 0.007344 |
| 0.090365 | 0.121818 | 0.40139  | 0.010106 | 0.021261 | 0.009079 | 0.005074 | 0.021972 | 0        | 0        | 0.00022  | 0        | 0        | 0        | 0        |
| 5.21E-05 | 0.000286 | 6.79E-05 | 0.000197 | 0.000105 | 6.05E-05 | 0        | 0.000115 | 0.000167 | 0.000702 | 0.000675 | 0        | 0        | 0        | 0        |
| 0.046043 | 0.050159 | 0.007081 | 0.053046 | 0.009686 | 0.018104 | 0.039912 | 0.042082 | 0.060325 | 0.018292 | 0.070185 | 0.015142 | 0.113801 | 0.278025 | 0.0296   |
| 0        | 0        | 0.000534 | 0        | 0        | 0.000341 | 0.000678 | 0.000167 | 0        | 0.000569 | 0.000799 | 0.000333 | 0.000412 | 0.000365 | 0.000178 |
| 0.000299 | 0.000351 | 0.004366 | 0        | 9.74E-05 | 0.002557 | 0.004536 | 0.001377 | 0.000223 | 0.00744  | 0.011407 | 0.00224  | 0.005643 | 0.007493 | 0.005023 |
| 0.015979 | 0.020545 | 0.021066 | 0.001325 | 0.001056 | 0.011686 | 0.010106 | 0.012434 | 0.005319 | 0.006799 | 0.010648 | 0.00345  | 0.019081 | 0.000265 | 0.006308 |
| 0        | 0.000317 | 0.000562 | 0        | 0        | 0        | 0        | 0.000131 | 0        | 0.000266 | 0.009697 | 0.000248 | 0.001824 | 0        | 0        |
| 0        | 0        | 0        | 0        | 0        | 0        | 0        | 0        | 0.000149 | 0        | 0.059013 | 0.003299 | 0.000776 | 0        | 0.000126 |
| 0.036824 | 0.009221 | 0.016095 | 0.00261  | 0.013652 | 0.002323 | 0.001499 | 0.04055  | 0.000921 | 0.001294 | 0.031964 | 0.15747  | 0.185859 | 0.005109 | 0.001309 |
| 0.003441 | 0.010526 | 0.00545  | 0.000197 | 0.000331 | 0.001025 | 0.000249 | 0.007172 | 0.000576 | 0.003508 | 0.000878 | 0.04416  | 0.042677 | 6.44E-05 | 0.001364 |
| 0.002205 | 0.001885 | 0.001235 | 0.000197 | 0.00081  | 0.000356 | 9.91E-05 | 0.000756 | 0.000196 | 0.000829 | 0.000865 | 0.006149 | 0.011679 | 0        | 0.0002   |
| 0.000122 | 0.000129 | 0.00012  | 0.00011  | 0.000152 | 7.88E-05 | 0        | 0.00024  | 0        | 0        | 0.000121 | 0.001921 | 0.001707 | 0        | 0.00023  |
| 0.008616 | 0.013585 | 0.004422 | 0.001065 | 0.005061 | 0.00182  | 0.001059 | 0.002465 | 6.72E-05 | 0.002631 | 0.005953 | 0.02325  | 0.019747 | 0.00059  | 0.001761 |
| 0.005476 | 0.026636 | 0.023077 | 0.002319 | 0.019286 | 0.003014 | 0.000212 | 0.009032 | 0.000274 | 0.005601 | 0.005968 | 0.047699 | 0.088082 | 0.001141 | 0.002387 |
| 0.046677 | 0.101135 | 0.104698 | 0.015307 | 0.07948  | 0.014113 | 0.003901 | 0.024313 | 0.000234 | 0.03748  | 0.090907 | 0.11451  | 0.084033 | 0.007194 | 0.012242 |
| 0.016674 | 0.004937 | 0.001634 | 0.001554 | 0.002661 | 0.000618 | 0.000997 | 0.004909 | 0.000209 | 0.00516  | 0.000951 | 0.097794 | 0.042873 | 0.000135 | 0.000857 |
| 0.003301 | 0.004829 | 0.00076  | 0.001451 | 0.003366 | 0.000323 | 0.000376 | 0.000524 | 0        | 0.004494 | 0.004111 | 0.008274 | 0.004678 | 0.00043  | 0.000306 |
| 0.00057  | 0.000853 | 0.000207 | 0.001558 | 0.000242 | 0.000788 | 0        | 0.000278 | 0        | 0.001555 | 0.00021  | 0.001825 | 0.001885 | 0        | 0.000325 |
| 8.60E-05 | 0.000326 | 5.56E-05 | 0.001897 | 0.002704 | 5.32E-05 | 0.000107 | 0.000378 | 5.81E-05 | 0.001512 | 0.000326 | 0.005131 | 0.002679 | 0        | 0.000326 |
| 6.79E-05 | 0.000271 | 0.000485 | 0.000162 | 0.000171 | 0        | 0        | 7.39E-05 | 5.45E-05 | 0        | 0.00019  | 0.002951 | 0.00221  | 0        | 0.0001   |
| 0.002898 | 0.001996 | 0.02232  | 0.002307 | 0.002295 | 0.000229 | 0        | 0.00193  | 0.000456 | 0.000605 | 0.012728 | 0.054075 | 0.014661 | 0.000637 | 0.0031   |
| 0.003285 | 0.006868 | 0.021665 | 0.003549 | 0.003016 | 5.68E-05 | 0        | 0.002334 | 0.00046  | 0.001119 | 0.022374 | 0.074963 | 0.014142 | 0.000449 | 0.003766 |
| 0.000177 | 0.000185 | 0.000744 | 0.000284 | 0.00053  | 0.000249 | 0.000271 | 0.000419 | 0        | 0.00127  | 0.000283 | 0.001355 | 0.000772 | 3.15E-05 | 0.000104 |
| 0.000326 | 0.000246 | 0.000868 | 0.000173 | 0.000136 | 0.000176 | 0.000118 | 0.000184 | 0        | 0.001561 | 0.000377 | 0.000711 | 0.002074 | 1.50E-05 | 0.00018  |
| 0.00199  | 0.002519 | 0.006772 | 0.003584 | 0.038275 | 0.002379 | 0.000956 | 0.006116 | 0.000125 | 0.00349  | 0.001556 | 0.0011   | 0        | 0.000169 | 0.001141 |
| 7.24E-05 | 7.08E-05 | 0        | 0.000276 | 0.001574 | 0.000126 | 0.000315 | 0.00103  | 0        | 0.000829 | 0        | 0        | 0        | 2.85E-05 | 0.000174 |
| 0.001322 | 9.86E-05 | 0.000343 | 0.00207  | 0.006487 | 0.000764 | 0.00079  | 0.001712 | 7.27E-05 | 0.0045   | 0        | 0.000155 | 0        | 4.34E-05 | 0.00071  |
| 0.215696 | 0.061071 | 0.109167 | 0.453375 | 0.49731  | 0.23697  | 0.307924 | 0.298909 | 0.061062 | 0.32603  | 0.063056 | 0.153461 | 0.066866 | 0.13729  | 0.270731 |
| 0        | 0        | 0.000296 | 0        | 0        | 0        | 0        | 0        | 0        | 0        | 6.32E-05 | 0        | 0        | 0        | 0        |
| 0.00127  | 0.005417 | 0.008461 | 0.002204 | 0.000491 | 0.000768 | 0.000784 | 0.00129  | 0.000687 | 0.000593 | 0.002074 | 0.001759 | 0.000897 | 0.000623 | 0.000509 |
| 5.43E-05 | 0        | 0.000179 | 0.000162 | 0        | 0        | 0.00057  | 0        | 0.000133 | 0.001004 | 0.000253 | 8.89E-05 | 0        | 0.000126 | 0        |
| 0.001352 | 0.001099 | 0.000707 | 0.00196  | 0.005334 | 0.000346 | 0.001984 | 0.000984 | 0.001187 | 0.023706 | 0.002765 | 0.000592 | 0        | 0.001031 | 0.0002   |
| 0        | 0        | 0        | 0        | 0        | 0        | 0        | 5.32E-05 | 0        | 0        | 0        | 0        | 0        | 0        | 3.11E-05 |
| 0        | 4.93E-05 | 0.000753 | 0.000264 | 0.001212 | 0        | 0        | 0.000498 | 0        | 0.001053 | 0.000159 | 5.92E-05 | 0.000189 | 6.59E-05 | 7.25E-05 |
| 0        | 0.001586 | 0.001004 | 8.28E-05 | 0        | 0        | 0        | 0.000326 | 0        | 0        | 3.79E-05 | 5.18E-05 | 0        | 0        | 0.000149 |
| 0        | 0        | 0.000648 | 0        | 0        | 0        | 0        | 0        | 0        | 0        | 0        | 0        | 0        | 0        | 0        |
| 0.000342 | 0.004127 | 0.003156 | 0        | 0.000129 | 0        | 0        | 0.000198 | 0.001466 | 0.00127  | 0.02414  | 0.000274 | 0        | 0.001541 | 0.000126 |
| 0        | 0        | 0        | 0        | 0        | 0        | 0        | 0        | 5.27E-05 | 0        | 0        | 0        | 0        | 0        | 0        |
| 0.00014  | 0.000564 | 0.000852 | 0.001699 | 0.004492 | 0.004174 | 0.000796 | 0.00027  | 0        | 0.011281 | 3.54E-05 | 0        | 0        | 0.000165 | 0.000582 |
| 0        | 5.85E-05 | 0.000753 | 0.000359 | 0.000935 | 6.42E-05 | 0        | 7.39E-05 | 0        | 0.000417 | 0        | 0        | 0        | 0        | 4.66E-05 |
| 0.000115 | 0.000487 | 0.002331 | 0.002039 | 0.000284 | 5.87E-05 | 0        | 3.43E-05 | 0.000225 | 0.000236 | 0.000114 | 0.00013  | 0        | 0.000647 | 6.04E-05 |

|          |          |          |          |          |          |          |          |          |          |          |          |          |          |          |
|----------|----------|----------|----------|----------|----------|----------|----------|----------|----------|----------|----------|----------|----------|----------|
| 0        | 0.000154 | 0.000133 | 0.000461 | 0.009947 | 0.000117 | 0        | 0        | 0        | 0        | 0        | 0.000111 | 0.000174 | 0        | 0.000459 |
| 0.001021 | 0.007453 | 0.000321 | 0.007788 | 0.007687 | 0.001624 | 0.002132 | 8.59E-05 | 0.000422 | 0.008771 | 0.000572 | 6.66E-05 | 0.00017  | 0        | 3.80E-05 |
| 0.000489 | 0.002609 | 0.000253 | 0.002429 | 0.001122 | 0.00084  | 0.001223 | 3.61E-05 | 0.000162 | 0.001167 | 0.000137 | 0.000437 | 0.000201 | 6.14E-05 | 9.50E-05 |
| 5.43E-05 | 0.000699 | 0.000253 | 0.000469 | 0.000697 | 0.001133 | 0.000327 | 0.001936 | 6.90E-05 | 0.00072  | 0.000248 | 0.000637 | 0.00263  | 0.00031  | 0.001162 |
| 0.000321 | 0.001318 | 0.000519 | 0        | 0.00014  | 0.001575 | 0.000706 | 0.004161 | 0.006456 | 0.000448 | 0.000195 | 0.000663 | 0.005226 | 0.001546 | 0.001362 |
| 0.000387 | 0.000539 | 0.000547 | 0.000698 | 0.000468 | 0.000788 | 0.000209 | 0.001671 | 0.001399 | 0.001549 | 0.000248 | 0.00027  | 0.003414 | 0.000306 | 0.001164 |
| 0.000439 | 0.001435 | 0        | 0.002259 | 0.000148 | 0.006363 | 0.005375 | 0.002198 | 0.011956 | 0.002825 | 0.000592 | 0        | 0.000647 | 5.99E-05 | 0.001704 |
| 0.001542 | 0.001444 | 0        | 0.002942 | 0.000132 | 0.007815 | 0.006353 | 0.004886 | 0.019664 | 0.002293 | 0.000941 | 0.00067  | 0.000783 | 0.000238 | 0.005768 |
| 0.000244 | 0.00134  | 0.000741 | 0.001554 | 0.001216 | 0.001602 | 0.001725 | 0.001965 | 0.004561 | 0.0002   | 0.000632 | 0        | 0.001226 | 0.000797 | 0.004315 |
| 0.054308 | 0.128248 | 0.056387 | 0.149943 | 0.05317  | 0.431195 | 0.349886 | 0.355288 | 0.492081 | 0.197658 | 0.074207 | 0.017071 | 0.111564 | 0.447603 | 0.483548 |
| 0.006724 | 0.016615 | 0.011676 | 0.024447 | 0.004617 | 0.019044 | 0.032429 | 0.025501 | 0.04628  | 0.009769 | 0.007584 | 0.001037 | 0.007398 | 0.016243 | 0.053882 |
| 0.000928 | 7.39E-05 | 0        | 0.000386 | 0.000136 | 0.000334 | 0.00017  | 8.07E-05 | 8.00E-05 | 0.000992 | 3.54E-05 | 0        | 0.00017  | 0        | 0.000157 |
| 0.000962 | 0.000219 | 0.000114 | 0.001053 | 0.000164 | 0.001102 | 0.001913 | 0.000517 | 0.001621 | 0.001288 | 0.000119 | 0.000133 | 0.000216 | 0        | 0.000485 |
| 0.068519 | 0.067541 | 0.010289 | 0.029967 | 0.002419 | 0.023176 | 0.03798  | 0.013965 | 0.046653 | 0.017784 | 0.078612 | 0.012158 | 0.005101 | 0.000538 | 0.005567 |
| 0.291917 | 0.249506 | 0.028829 | 0.087284 | 0.021993 | 0.095359 | 0.123592 | 0.038882 | 0.161093 | 0.086332 | 0.326224 | 0.029925 | 0.018142 | 0.001694 | 0.030431 |
| 0.00046  | 0.00202  | 0.000293 | 0.000209 | 0        | 0.000594 | 0.000155 | 0.000747 | 0.002562 | 0.000768 | 0.000724 | 0.000963 | 0.000984 | 0        | 0.000119 |
| 0.000281 | 0.000431 | 0        | 0.001128 | 0.00014  | 0.000913 | 0.000651 | 0.00039  | 0.000781 | 0.001748 | 0.000392 | 0.000144 | 0.000216 | 0        | 0.000737 |
| 0.000235 | 0.000644 | 0        | 0.000544 | 0        | 0.000552 | 0.000141 | 0.000185 | 0        | 0.001645 | 0.000114 | 0.000518 | 0.000394 | 0        | 0.000314 |
| 0        | 0        | 0        | 0.002106 | 0        | 0.000137 | 0.000167 | 0.000136 | 0.000629 | 0.00101  | 0        | 0.000207 | 0.000219 | 0.000291 | 7.94E-05 |
| 0.000928 | 0.001078 | 0.003335 | 0.005453 | 0.001847 | 0.000755 | 0.000752 | 0.001413 | 0.000672 | 0.016217 | 0.000751 | 0.00786  | 0.003709 | 0.000472 | 0.000914 |
| 4.53E-05 | 0.001608 | 0.000222 | 0.028457 | 0.000997 | 0.000697 | 0.000364 | 0.001298 | 0.035885 | 0.002958 | 0.000627 | 0.00147  | 0.001525 | 6.74E-05 | 0.00329  |
| 0.002094 | 0.002769 | 0.00105  | 0.01069  | 0.000413 | 0.005323 | 0.007539 | 0.001594 | 0.02569  | 0.026676 | 0.0036   | 0.001773 | 0.000904 | 0.00024  | 0.002095 |
| 0.000604 | 0.000511 | 0        | 0.002019 | 0        | 0.001223 | 0.00041  | 0.001025 | 0.000334 | 0.002837 | 3.04E-05 | 0.001233 | 0.001782 | 0.000746 | 0.000901 |
| 0.000181 | 0.000253 | 0        | 0.000694 | 0.001134 | 0.002405 | 9.17E-05 | 0.001353 | 0.000114 | 0.002365 | 5.06E-05 | 0.000163 | 0.000613 | 8.84E-05 | 0.001335 |
| 0.000421 | 0.000748 | 7.41E-05 | 0.004164 | 0.004695 | 0.009413 | 0.000695 | 0.004778 | 0.000654 | 0.015014 | 7.84E-05 | 0.001159 | 0.006838 | 0.001851 | 0.006678 |
| 0.00065  | 0        | 0.000602 | 0.000505 | 0.000518 | 0.001065 | 0.00057  | 0.000429 | 0.000124 | 0.005607 | 0.000382 | 0.005287 | 0.000973 | 0.000349 | 0.000406 |
| 0.000636 | 0.000422 | 0        | 0.005165 | 0.004804 | 0.003012 | 0.000394 | 0.001529 | 0        | 0.005251 | 0        | 0.003358 | 0.000757 | 8.54E-05 | 0.002433 |
| 0.001062 | 0.000524 | 0.000831 | 0.000722 | 0.000456 | 0.000944 | 0.000694 | 0.005125 | 0.002284 | 0.001736 | 0.000215 | 0.004861 | 0.00333  | 0.000226 | 0.000957 |
| 5.66E-05 | 0.000293 | 0.000201 | 7.89E-05 | 0        | 0.000323 | 0        | 0.00029  | 0        | 0.000671 | 7.59E-05 | 0.001092 | 0.00411  | 0.000211 | 0.000155 |
| 0.000611 | 0.013458 | 0.015029 | 0.001782 | 0.00473  | 0.002049 | 0.000973 | 0.010124 | 0.000732 | 0.002674 | 0.007531 | 0.004191 | 0.009646 | 0.000304 | 0.001934 |
| 0.000206 | 0.001645 | 0.000753 | 0.000769 | 0.001286 | 0.000356 | 0.000215 | 0.002143 | 0.000196 | 0.002069 | 0.001493 | 0.000648 | 0.000973 | 0.000327 | 0.001211 |
| 0.00141  | 0.003154 | 0.000195 | 0.003565 | 0.004675 | 0.007257 | 0.002494 | 0.001163 | 0.000242 | 0.009672 | 0.003891 | 0.001085 | 0.00165  | 3.15E-05 | 0.001906 |
| 4.75E-05 | 0.001229 | 0.008186 | 0.000138 | 0.001305 | 0.00204  | 0.002048 | 0.000644 | 0        | 0.004658 | 0.002603 | 0.001385 | 0.012621 | 6.74E-05 | 0.000572 |
| 0.000874 | 0.001832 | 0.011157 | 0.000331 | 0.007344 | 0.020929 | 0.018626 | 0.008136 | 5.45E-05 | 0.010084 | 0.003183 | 0.001503 | 0.00257  | 0.000656 | 0.004783 |

| HC148    | HC133    | HC112    | HC132    | HC130    | HC114    | HC115    | HC116    | HC118    | HC119    | HC120    | HC121    | HC122    | HC123    | HC124    |
|----------|----------|----------|----------|----------|----------|----------|----------|----------|----------|----------|----------|----------|----------|----------|
| 0        | 0        | 0        | 0        | 0        | 0        | 0        | 0.000434 | 0        | 0        | 0        | 0        | 0        | 0        | 0        |
| 0        | 0        | 0        | 0        | 0        | 0        | 0.000255 | 0        | 0        | 0        | 0        | 0        | 0.000277 | 0        | 0        |
| 0        | 0        | 0        | 0.00013  | 0        | 0        | 0.010168 | 0.001961 | 0.000666 | 0.00172  | 0        | 0.000163 | 0.001225 | 0.001018 | 0.000133 |
| 0        | 0        | 0        | 0.000263 | 0        | 0        | 0.003832 | 0.000352 | 0.000884 | 0        | 0        | 0.000224 | 0.000739 | 0.000187 | 0        |
| 0        | 0        | 8.12E-05 | 0.000163 | 0        | 0        | 0.008932 | 0.001833 | 0.001005 | 0        | 0        | 0.000407 | 0.001479 | 0.000992 | 0.000172 |
| 0        | 0.000956 | 0        | 0        | 0        | 0.000204 | 0.006142 | 0.000157 | 0.002935 | 0        | 0        | 0        | 0.00077  | 6.31E-05 | 0        |
| 0        | 0        | 0        | 0.000652 | 0        | 0.000172 | 0.000266 | 0        | 0.000603 | 0.004521 | 0        | 0.000631 | 0.000331 | 0        | 0.001481 |
| 0        | 0.0008   | 0.00014  | 0.007186 | 0.000573 | 0.000114 | 0.006019 | 0.002424 | 0.007695 | 0.009084 | 0.00071  | 0.009868 | 0.01545  | 0.000705 | 0.012707 |
| 0.02466  | 0.011712 | 0.001838 | 0.008962 | 0.005148 | 0.013221 | 0.004527 | 0.034144 | 0.025303 | 0.036309 | 0.031064 | 0.085771 | 0.126487 | 0.011139 | 0.029757 |
| 0.002231 | 0.010442 | 0.003782 | 0.00273  | 0.002491 | 0.004376 | 0.040877 | 0.022576 | 0.029053 | 0.085003 | 0.010322 | 0.026306 | 0.03797  | 0.027317 | 0.010161 |
| 0.000853 | 0.000605 | 7.10E-05 | 0.000126 | 0.003058 | 0.001495 | 0.00092  | 0.003936 | 0.000884 | 0.00699  | 0.000757 | 0.002159 | 0.006177 | 0        | 0.000216 |
| 9.72E-05 | 0.000474 | 0.000209 | 0        | 0        | 0.000403 | 0.000777 | 0.001519 | 0.000339 | 0.000347 | 0.000177 | 0.000336 | 0.001502 | 0.000141 | 0        |
| 6.84E-05 | 0.002566 | 0.00141  | 0        | 0.001277 | 0.002998 | 0.005518 | 0.007722 | 0.000718 | 0.001817 | 0.00077  | 0.000336 | 0.001124 | 0.000225 | 0.003017 |
| 0.000295 | 0.000889 | 7.51E-05 | 0.000269 | 0.000206 | 0.000697 | 0.004486 | 0.002372 | 0.002108 | 0.003467 | 8.23E-05 | 0.002383 | 0.005206 | 0.000346 | 0.000987 |
| 0.015043 | 0.023464 | 0.019077 | 0.00428  | 0.01989  | 0.006873 | 0.012672 | 0.028173 | 0.011348 | 0.01276  | 0.002485 | 0.012822 | 0.021396 | 0.008728 | 0.012125 |
| 0        | 0.103318 | 0.014706 | 0        | 0        | 0.002173 | 0.024771 | 0.019306 | 0        | 0        | 0        | 0.000163 | 0        | 0        | 0        |
| 0        | 0.000547 | 0        | 0        | 0        | 0        | 0.000746 | 0.000254 | 0        | 0.001304 | 0.000203 | 0        | 0        | 0        | 0        |
| 0.116742 | 0.021693 | 0.047328 | 0.001104 | 0.014319 | 0.0107   | 0.086168 | 0.052073 | 0.052048 | 0.005132 | 0.003689 | 0.012526 | 0.008749 | 0.005197 | 0.013234 |
| 0        | 0        | 0        | 0        | 0        | 0.000358 | 0.003638 | 0        | 0.00112  | 0.010693 | 8.96E-05 | 0.002587 | 0        | 0        | 0        |
| 0.00027  | 8.55E-05 | 0        | 0.000569 | 0.000323 | 0.002584 | 0.020367 | 0.001399 | 0.009131 | 0.012274 | 0.000335 | 0.029921 | 0.003466 | 0        | 0.000333 |
| 0.003156 | 0.00322  | 0.007532 | 0.002009 | 0.005635 | 0.002725 | 0.00234  | 0.01516  | 0.011601 | 0.008932 | 0.005053 | 0.002465 | 0.001594 | 0.004121 | 0.078261 |
| 0        | 7.64E-05 | 0        | 0.000156 | 0        | 0        | 0        | 0        | 0        | 0.000319 | 9.51E-05 | 0.000193 | 0.000223 | 0        | 0.000505 |
| 0        | 0        | 0        | 0        | 0.000281 | 0        | 0        | 0        | 0.000327 | 0.001498 | 6.77E-05 | 0.001232 | 0        | 0.00054  | 0.002374 |
| 0.00492  | 0.007561 | 0.001987 | 0.069003 | 0.003542 | 0        | 0.062041 | 0.011711 | 0.004187 | 0.138843 | 0.000161 | 0.062795 | 0.1056   | 0.005344 | 0.034898 |
| 0        | 0.00194  | 0.000584 | 0.016424 | 0.004996 | 0.000761 | 0.00372  | 0.004041 | 0.010975 | 0.004466 | 0.001401 | 0.006182 | 0.015119 | 0.000593 | 0.037311 |
| 0.000202 | 0.000782 | 0.000142 | 0.008217 | 0.001254 | 0        | 0.000715 | 0.000733 | 0.007081 | 0.011705 | 0.000335 | 0.007414 | 0.00925  | 0.000288 | 0.016717 |
| 0        | 0        | 7.91E-05 | 0.002813 | 0.000438 | 0.000103 | 0.000848 | 0        | 0.000936 | 0.001193 | 0.000254 | 0.001874 | 0.001648 | 0.000129 | 0.003705 |
| 0.000702 | 0.007588 | 0.000475 | 0.00692  | 0.00171  | 0.000387 | 0.007205 | 0.004639 | 0.00456  | 0.015062 | 0.00128  | 0.008178 | 0.011268 | 0.000384 | 0.020228 |
| 0.0005   | 0.010478 | 0.000678 | 0.014442 | 0.004593 | 0.00158  | 0.011568 | 0.014674 | 0.026768 | 0.019195 | 0.001787 | 0.029962 | 0.046242 | 0.00077  | 0.039979 |
| 0.004056 | 0.083263 | 0.004982 | 0.037977 | 0.016003 | 0.006181 | 0.096388 | 0.021401 | 0.055539 | 0.186899 | 0.011076 | 0.080373 | 0.084905 | 0.004947 | 0.063596 |
| 0.000414 | 0.001787 | 0.00058  | 0.021446 | 0.004332 | 0.000808 | 0.017822 | 0.00336  | 0.010199 | 0.009459 | 0.000658 | 0.012791 | 0.028712 | 0.000629 | 0.043118 |
| 0.000705 | 0.001772 | 6.70E-05 | 0.003921 | 0.001449 | 0.00018  | 0.003924 | 0.00431  | 0.003147 | 0.008793 | 0.000155 | 0.003127 | 0.004275 | 0.00024  | 0.007266 |
| 0.000191 | 9.47E-05 | 8.32E-05 | 0.001792 | 0        | 0        | 0.000501 | 0.003981 | 0.006415 | 0.018085 | 0.000649 | 0.01492  | 0.005638 | 0.000247 | 0.011409 |
| 9.72E-05 | 0        | 7.71E-05 | 0.005168 | 0.000181 | 0.00057  | 0.007388 | 0.003951 | 0.005169 | 0.005936 | 0.000364 | 0.009899 | 0.016151 | 0.00244  | 0.015097 |
| 0        | 0        | 8.93E-05 | 0.013082 | 0.000153 | 9.01E-05 | 0.000715 | 0.000389 | 0.001625 | 0.006616 | 0.000157 | 0.001151 | 0.001279 | 6.31E-05 | 0.018769 |
| 0        | 0.000156 | 6.09E-05 | 0.302348 | 0.005272 | 0.00053  | 0.011629 | 0.021184 | 0.019549 | 0.079345 | 0.000845 | 0.1416   | 0.032047 | 0        | 0.198425 |
| 0        | 0.000394 | 0.000116 | 0.451701 | 0.005188 | 0.000692 | 0.016627 | 0.029954 | 0.014977 | 0.109829 | 0.002169 | 0.191584 | 0.038032 | 0.000192 | 0.189195 |
| 0.000191 | 0.000174 | 0.000172 | 0.000722 | 0        | 0        | 0.001145 | 0.000838 | 0.00236  | 0.006005 | 0.000677 | 0.000947 | 0.004082 | 0.000672 | 0.001608 |
| 0        | 0.000238 | 0        | 0.000871 | 0        | 0        | 0.000317 | 0.000913 | 0.001585 | 0.008932 | 0.00049  | 0.003554 | 0.003088 | 0.000881 | 0.002363 |
| 0.000112 | 0.001036 | 0.000834 | 0        | 0.000436 | 0.004699 | 0        | 0.00229  | 0.0012   | 0.001193 | 0.001849 | 0.000479 | 0.000832 | 0.005394 | 0.000139 |
| 0        | 0.000165 | 0.000252 | 0        | 0        | 0.001105 | 0        | 0        | 0.00062  | 0.000596 | 0.000201 | 0        | 0        | 0.000482 | 0        |
| 0.000857 | 0.001301 | 0.000432 | 0        | 0        | 0.005145 | 0        | 0.000224 | 0.000896 | 0        | 0.000938 | 0        | 0        | 0.00122  | 0        |
| 0.392686 | 0.164413 | 0.254447 | 0.000705 | 0.031349 | 0.630747 | 0.223146 | 0.243761 | 0.227423 | 0.056031 | 0.227396 | 0.060708 | 0.239281 | 0.101217 | 0.007377 |
| 0        | 0        | 0        | 0        | 0        | 0        | 0        | 0        | 0        | 0        | 0        | 0        | 0        | 0        | 0        |
| 0        | 0.001039 | 0.000933 | 0.000123 | 0.00015  | 0.001267 | 0.000889 | 0.000531 | 0.000293 | 0.000416 | 0.000583 | 0.000407 | 0.000162 | 0.000152 | 0.000771 |
| 8.64E-05 | 0.000196 | 0.000152 | 0        | 9.73E-05 | 0.000103 | 0        | 0        | 0        | 0        | 0        | 0        | 0        | 6.06E-05 | 0.000128 |
| 0.00235  | 0.000706 | 0.001447 | 0        | 0.000856 | 0.00928  | 0.000491 | 0.000516 | 0.000678 | 0.000666 | 0.000486 | 0        | 0        | 0.000189 | 0.000555 |
| 0        | 0        | 0        | 0.00015  | 0        | 0        | 0        | 0        | 0        | 0        | 0        | 0        | 0        | 0        | 0        |
| 0        | 0.000254 | 6.90E-05 | 0.00015  | 0        | 0.000583 | 0.002003 | 0        | 0.00294  | 0        | 0        | 0        | 0.000323 | 0.000379 | 0.000139 |
| 0        | 0        | 0        | 0        | 0        | 0.000109 | 0.000644 | 0.000142 | 0.000316 | 0        | 7.32E-05 | 0        | 0.000863 | 0.00028  | 0        |
| 0        | 0        | 0        | 0        | 0        | 0        | 0        | 0        | 0        | 0        | 0        | 0        | 0        | 0        | 0        |
| 0.000223 | 0.002374 | 0.00014  | 0        | 9.07E-05 | 0.00074  | 0.003127 | 0.00089  | 0        | 0.001359 | 0.000501 | 0.000255 | 0.000154 | 0        | 0        |
| 0        | 0        | 0        | 0        | 0        | 0        | 0        | 0        | 0        | 0        | 0        | 0        | 0        | 0        | 0        |
| 0        | 9.47E-05 | 0.001004 | 0        | 8.63E-05 | 0.006915 | 0.000347 | 0.008328 | 0.000293 | 0.000791 | 0.000715 | 0        | 0        | 0.000897 | 0        |
| 0        | 0        | 0        | 0        | 0        | 0.004983 | 0        | 0.000172 | 0        | 0        | 0        | 0        | 0.000208 | 0        | 0        |
| 0        | 0        | 0        | 0.000236 | 7.96E-05 | 0.000331 | 0.01913  | 0.002664 | 0.001281 | 0.002136 | 8.05E-05 | 0.001904 | 0.001348 | 0.000364 | 0        |

|          |          |          |          |          |          |          |          |          |          |          |          |          |          |          |
|----------|----------|----------|----------|----------|----------|----------|----------|----------|----------|----------|----------|----------|----------|----------|
| 0        | 0        | 0        | 0        | 0        | 0.006062 | 0.004486 | 0.002178 | 0.000281 | 0.00018  | 8.60E-05 | 0        | 0        | 0        | 0        |
| 0.00072  | 0.000965 | 0.001132 | 0.000103 | 0.000321 | 0.004291 | 0.010209 | 0        | 0.006087 | 0.002358 | 0.000993 | 0.000214 | 0.000331 | 0.001227 | 0.000189 |
| 0.00077  | 6.72E-05 | 0.000603 | 0.000116 | 0.000119 | 0.002036 | 0.031853 | 0.000404 | 0.006053 | 0.008294 | 0.000161 | 0.001528 | 0        | 0.000225 | 0.002002 |
| 0.000479 | 0.000156 | 0.000388 | 0        | 0.001423 | 0.000199 | 0.000266 | 0.000412 | 0.00193  | 0        | 0.000967 | 0.000407 | 0.000185 | 0.000399 | 0.001919 |
| 0.000385 | 8.55E-05 | 0.001627 | 0.000136 | 0.002863 | 0.000239 | 0        | 0.00128  | 0.001464 | 0        | 0.00259  | 0        | 0.000809 | 0.003725 | 0.00183  |
| 0.000594 | 7.33E-05 | 0.000844 | 0        | 0.001732 | 0.000294 | 0.000296 | 0.000681 | 0.001585 | 0.000693 | 0.0012   | 0.000244 | 0.000709 | 0.000404 | 0.002535 |
| 0.001688 | 0.000483 | 0.005106 | 0        | 0.012315 | 0.001238 | 0        | 0.001901 | 0.003032 | 0        | 0.005053 | 0.000193 | 0        | 0.005493 | 0        |
| 0.002861 | 0.001503 | 0.005982 | 0        | 0.013644 | 0.001193 | 0.000613 | 0.001332 | 0.005416 | 0        | 0.013543 | 0.000306 | 0.000169 | 0.009553 | 0.000133 |
| 0.00158  | 8.86E-05 | 0.002784 | 0        | 0.002852 | 0.000912 | 0.000501 | 0.001182 | 0.000253 | 0        | 0.00162  | 0        | 0.000362 | 9.60E-05 | 0.000189 |
| 0.305336 | 0.020504 | 0.403722 | 0.001836 | 0.328535 | 0.124737 | 0.050289 | 0.160746 | 0.088905 | 0.018058 | 0.454018 | 0.031662 | 0.035536 | 0.694564 | 0.079708 |
| 0.022778 | 0.002911 | 0.058239 | 0        | 0.019505 | 0.016163 | 0.002953 | 0.013918 | 0.00421  | 0.002926 | 0.025875 | 0.002526 | 0.001248 | 0.009298 | 0.007327 |
| 0.000133 | 0.000944 | 0        | 0        | 0.000327 | 0.000318 | 0        | 0        | 0.00135  | 0        | 0.000466 | 0.000143 | 0        | 0.000424 | 0        |
| 0.001087 | 0.000819 | 0.001098 | 0        | 0.000454 | 0.002672 | 0        | 0.000658 | 0.00321  | 0        | 0.00137  | 0.000407 | 0        | 0.000354 | 0        |
| 0.012265 | 0.110626 | 0.027892 | 0.002714 | 0.079955 | 0.013144 | 0.023361 | 0.028869 | 0.040941 | 0.009916 | 0.025572 | 0.021417 | 0.002241 | 0.013488 | 0.000505 |
| 0.036691 | 0.336108 | 0.086049 | 0.006132 | 0.329903 | 0.044225 | 0.07321  | 0.097082 | 0.13196  | 0.042301 | 0.100788 | 0.082349 | 0.007948 | 0.049212 | 0.002352 |
| 0        | 0.000296 | 0.000958 | 0.000283 | 0.003443 | 9.81E-05 | 0        | 0.000688 | 0.000586 | 0.000305 | 0.000931 | 0.000631 | 0        | 0.000758 | 0.000161 |
| 0.00014  | 0.001216 | 0.000469 | 0.000273 | 0.001805 | 0.000671 | 0.001196 | 0.001167 | 0.003078 | 0.00086  | 0.000722 | 0.001008 | 0.000339 | 0.00146  | 0.000177 |
| 0.000392 | 0.001246 | 0        | 0.000249 | 0.00025  | 0.000639 | 0.001237 | 0.001235 | 0.003555 | 0.000569 | 0.001968 | 0.004043 | 0.000732 | 0.000174 | 0        |
| 0.002505 | 9.47E-05 | 0.000556 | 0        | 0.000252 | 0.000848 | 0.000511 | 0.002769 | 0.00089  | 0        | 0.000245 | 0        | 0.000162 | 0.000465 | 0        |
| 0.006755 | 0.007649 | 0.001646 | 0        | 0.006124 | 0.001765 | 0.02984  | 0.02069  | 0.015391 | 0.001415 | 0.001754 | 0.003697 | 0.015342 | 0.00147  | 0        |
| 0.006406 | 0.001903 | 0.013876 | 0        | 0.006359 | 0.004267 | 0.001901 | 0.021566 | 0.028829 | 0.000402 | 0.008662 | 0.000183 | 0.000693 | 0.003563 | 0        |
| 0.011581 | 0.020663 | 0.009566 | 0        | 0.042041 | 0.004935 | 0.005488 | 0.015497 | 0.024172 | 0        | 0.00797  | 0.001446 | 0.000578 | 0.006644 | 0        |
| 0.001353 | 0.000318 | 4.87E-05 | 0.00018  | 7.08E-05 | 0.000933 | 0.005416 | 0.002896 | 0.010452 | 0.001276 | 0.000163 | 0.001762 | 0.001047 | 5.81E-05 | 0.003056 |
| 0.00018  | 5.19E-05 | 0        | 0        | 8.63E-05 | 0.00211  | 0.000419 | 0.003031 | 0.006202 | 0.001498 | 0.001525 | 0.001823 | 0.000901 | 0.000374 | 0.001065 |
| 0.002674 | 0.000779 | 0        | 0.000116 | 0.00025  | 0.006171 | 0.001747 | 0.005358 | 0.00893  | 0.002968 | 0.009498 | 0.003493 | 0.002934 | 0.004058 | 0.011537 |
| 0.001342 | 0.002322 | 0.000789 | 0.000166 | 0.001858 | 0.002311 | 0.003924 | 0.000763 | 0.001223 | 0.001345 | 0.001403 | 0.001141 | 0.002457 | 0.00099  | 0.001475 |
| 0.00032  | 0.00117  | 8.32E-05 | 0        | 0        | 0.008964 | 0.004435 | 0.004557 | 0.016229 | 0.004022 | 0.002824 | 0.003432 | 0.006708 | 0.000588 | 0.000338 |
| 0.000288 | 0.000574 | 0.001907 | 0        | 0.000912 | 0.003552 | 0.000501 | 0.002671 | 0.006696 | 0        | 0.00246  | 0.000835 | 0.001733 | 0.000745 | 0.000183 |
| 0        | 0.000168 | 0        | 0.0002   | 0.000325 | 0.000395 | 0        | 0.000861 | 0.000838 | 0.00068  | 0.000508 | 0.002668 | 0.005869 | 0.000258 | 0.003367 |
| 0.002519 | 0.003519 | 0.002145 | 0.000572 | 0.000241 | 0.004554 | 0.007695 | 0.002372 | 0.001413 | 0.001415 | 0.002164 | 0.001253 | 0.004952 | 0.0002   | 0.000571 |
| 0.000173 | 0.000269 | 0.000568 | 0.000113 | 0.000199 | 0.002428 | 0.000961 | 0.00021  | 0.001039 | 0.000361 | 0.000402 | 0.000173 | 0.001279 | 0.000561 | 0.000383 |
| 0        | 0.00176  | 0.002677 | 0        | 0.001071 | 0.002775 | 0.000501 | 0.01305  | 0.003808 | 0.00129  | 0.001924 | 0        | 0.016698 | 0        | 0        |
| 0        | 0.00402  | 0.000532 | 0        | 0.000177 | 0.002155 | 0.000439 | 0.000329 | 0.000281 | 0        | 0.001703 | 0.000193 | 0.002619 | 0        | 0.000743 |
| 0.004297 | 0.007995 | 0.002581 | 0        | 0.005129 | 0.005723 | 0        | 0.008254 | 0.00093  | 0.001151 | 0.007689 | 0.000224 | 0.000747 | 0        | 0        |

|          |          |          |          |          |          |          |          |          |          |          |          |          |          |          |
|----------|----------|----------|----------|----------|----------|----------|----------|----------|----------|----------|----------|----------|----------|----------|
| HC125    | HC126    | HC127    | HC128    | HC129    | HC131    | HC075    | HC028    | HC073    | HC020    | HC021    | HC022    | HC023    | HC024    | HC025    |
| 0        | 0        | 0        | 0        | 0        | 0        | 0        | 0        | 0        | 0        | 0        | 0        | 0        | 0        | 0        |
| 0        | 0        | 0        | 0        | 0        | 0        | 0        | 0        | 0        | 0        | 0        | 0        | 0        | 0        | 0        |
| 0.003388 | 0        | 0        | 0.000105 | 0.000199 | 0        | 0.003739 | 0        | 0.000964 | 0        | 0.00122  | 0.00012  | 0.001405 | 0.000158 | 0        |
| 0.006458 | 0        | 0        | 0        | 0.000215 | 0.000134 | 0.001343 | 0        | 0.000331 | 0.000212 | 0.00216  | 0.000103 | 0.000544 | 0        | 0        |
| 0.017275 | 0        | 0        | 0        | 0        | 0        | 0.001745 | 0        | 0.000174 | 0        | 0.001827 | 0        | 0.001983 | 0        | 0        |
| 0.000461 | 0        | 7.01E-05 | 0        | 0.000635 | 0.000783 | 0.000491 | 3.35E-05 | 0.000432 | 0        | 0.000157 | 0.000116 | 0.000111 | 0.000297 | 0.000318 |
| 0        | 0        | 7.23E-05 | 0.000128 | 0        | 0.000134 | 0.001008 | 0        | 9.75E-05 | 0        | 0.000309 | 0.000137 | 0        | 0.000135 | 0        |
| 0.01047  | 0.000918 | 0.00203  | 0.000949 | 0.006767 | 0.010555 | 0.004609 | 0.000973 | 0.002113 | 0.001046 | 0.010419 | 0.006228 | 0.002079 | 0.003076 | 0.002974 |
| 0.031327 | 0.009028 | 0.006392 | 0.026927 | 0.024319 | 0.046496 | 0.037427 | 0.004921 | 0.030169 | 0.320555 | 0.061214 | 0.013542 | 0.018764 | 0.004631 | 0.005628 |
| 0.028226 | 0.00349  | 0.005067 | 0.013404 | 0.0148   | 0.050653 | 0.03417  | 0.002972 | 0.037079 | 0.020216 | 0.032672 | 0.036466 | 0.031294 | 0.017317 | 0.010866 |
| 0.000993 | 0        | 0.00014  | 9.99E-05 | 0.000851 | 0.003486 | 0.002677 | 0.000312 | 0.008762 | 0.015793 | 0.003424 | 0.000531 | 0.00109  | 0        | 0        |
| 0        | 0        | 6.33E-05 | 0        | 0.000199 | 0.001003 | 0.001477 | 0.000111 | 0.000999 | 0.000629 | 0        | 0        | 0.000108 | 0        | 0.000178 |
| 0.001136 | 0.001168 | 0.000221 | 0.000105 | 0.000702 | 0.016879 | 0.002713 | 0.000895 | 0.003509 | 0.00013  | 0.000828 | 0.000154 | 0.001322 | 0        | 0.004328 |
| 0.001433 | 0.000275 | 0.00031  | 0.000247 | 0.000685 | 0.002371 | 0.006648 | 0.000673 | 0.001518 | 0.001805 | 0.001641 | 0.000437 | 0.000717 | 0.000297 | 0.000948 |
| 0.011073 | 0.010396 | 0.005112 | 0.008807 | 0.01048  | 0.054375 | 0.027066 | 0.009227 | 0.02213  | 0.020654 | 0.01615  | 0.017788 | 0.04962  | 0.003508 | 0.034901 |
| 0        | 0        | 0        | 0        | 0        | 0        | 0        | 0        | 0.048717 | 0        | 0        | 0        | 0        | 0        | 8.50E-05 |
| 0        | 0        | 0        | 0.001252 | 0.000193 | 0.000182 | 0.000357 | 0        | 0        | 0        | 0.00046  | 0        | 0        | 0.000181 | 0        |
| 0.012998 | 0.00037  | 0.005673 | 0.015311 | 0.023247 | 0.048416 | 0.027111 | 0.009938 | 0.019049 | 0.132045 | 0.014426 | 0.063803 | 0.032246 | 0.050415 | 0.002374 |
| 0.00045  | 0        | 0        | 0        | 0.002492 | 0        | 0.001214 | 0        | 0        | 0.000226 | 0.004511 | 0        | 8.65E-05 | 0.000107 | 0        |
| 0.001463 | 0.000113 | 0.002045 | 0.000652 | 0.027247 | 0.001137 | 0.003534 | 0        | 0.000397 | 0.001525 | 0.041067 | 0        | 0.000933 | 0.001285 | 0        |
| 0.001136 | 0.002091 | 0.081309 | 0.005724 | 0.008077 | 0.034305 | 0.013489 | 0.012176 | 0.029378 | 0.006092 | 0.059284 | 0.009536 | 0.020388 | 0.018496 | 0.029125 |
| 0        | 0        | 7.01E-05 | 0.000219 | 0        | 0.000295 | 0.002329 | 0        | 0.000101 | 0        | 0.000328 | 0        | 0        | 0.000325 | 0.00011  |
| 0        | 0.001507 | 0.00134  | 0.000563 | 0.000177 | 0.007627 | 0.037771 | 0.000304 | 0.033611 | 0        | 0.001239 | 0.000728 | 0.000945 | 0.005438 | 0.006371 |
| 0.011923 | 0.000777 | 0.050622 | 0.000919 | 0.037456 | 0.035871 | 0.054427 | 0.011747 | 0.041531 | 0.011171 | 0.01204  | 0.102871 | 0.007848 | 0.066271 | 0.029616 |
| 0.001474 | 0.006367 | 0.032826 | 0.003941 | 0.041157 | 0.063059 | 0.002967 | 0.002368 | 0.005441 | 0.002687 | 0.010282 | 0.03127  | 0.001872 | 0.10419  | 0.008051 |
| 0.001515 | 0.001241 | 0.020687 | 0.002434 | 0.011391 | 0.011017 | 0.001522 | 0.00062  | 0.002402 | 0.003275 | 0.009508 | 0.003758 | 0.002906 | 0.013271 | 0.009098 |
| 0.000757 | 0        | 0.004082 | 0.000125 | 0.000525 | 0.003111 | 0.00108  | 0.000225 | 0.000498 | 0        | 0.000475 | 0.001528 | 0.00084  | 0.000636 | 0.001472 |
| 0.001013 | 0.000358 | 0.023953 | 0.001324 | 0.002757 | 0.024007 | 0.008473 | 0.002001 | 0.006315 | 0.002598 | 0.004541 | 0.006711 | 0.00194  | 0.004264 | 0.009907 |
| 0.004698 | 0.003355 | 0.02329  | 0.006631 | 0.013259 | 0.053839 | 0.023831 | 0.002058 | 0.015053 | 0.012751 | 0.016929 | 0.015139 | 0.004318 | 0.016036 | 0.008912 |
| 0.033773 | 0.004667 | 0.113787 | 0.010789 | 0.036505 | 0.103607 | 0.153349 | 0.011789 | 0.112775 | 0.029255 | 0.057237 | 0.062365 | 0.032595 | 0.049562 | 0.060654 |
| 0.001617 | 0.00101  | 0.014894 | 0.001649 | 0.01938  | 0.029204 | 0.029815 | 0.00164  | 0.002952 | 0.001067 | 0.002586 | 0.017471 | 0.001164 | 0.017303 | 0.003498 |
| 0.001955 | 0.000167 | 0.002312 | 0.000469 | 0.002541 | 0.006581 | 0.021083 | 0.000418 | 0.002983 | 0.001819 | 0.003115 | 0.002102 | 0.001229 | 0.003109 | 0.002267 |
| 0.001801 | 8.95E-05 | 0.001089 | 0.008238 | 0.002674 | 0.005943 | 0.000723 | 3.75E-05 | 0.001246 | 0.010365 | 0.004791 | 0.000586 | 0.001881 | 0.000441 | 0.000954 |
| 0.011544 | 0.000424 | 0.000273 | 0.000547 | 0.005651 | 0.010566 | 0.004373 | 0.000419 | 0.002089 | 0.000397 | 0.015528 | 0.012352 | 0.00105  | 0.001624 | 0.000822 |
| 0        | 0        | 0.003173 | 0.000233 | 0.003536 | 0.000735 | 0.000928 | 0.000131 | 8.36E-05 | 0.00039  | 0        | 0.008453 | 0        | 0.001944 | 7.68E-05 |
| 0.001955 | 0        | 0.022228 | 0.003778 | 0.172368 | 0.010046 | 0.028213 | 0.003077 | 0.000654 | 0.073618 | 0.009228 | 0.053505 | 0.002298 | 0.004227 | 0        |
| 0.000849 | 0.000193 | 0.009431 | 0.002684 | 0.230098 | 0.013656 | 0.043562 | 0.003902 | 0.002416 | 0.101382 | 0.008577 | 0.070116 | 0.001896 | 0.004404 | 0.000455 |
| 0.00042  | 0.000443 | 0.001089 | 0.001102 | 0.001392 | 0.003878 | 0.001227 | 8.98E-05 | 0.001358 | 0.001778 | 0.002351 | 0.002898 | 0.001532 | 0.001244 | 0.000861 |
| 0.001054 | 0.000822 | 0.001632 | 0.002276 | 0.000834 | 0.004377 | 0.000589 | 0.00011  | 0.000755 | 0.003364 | 0.004859 | 0.00134  | 0.002459 | 0.002482 | 0.00145  |
| 0.003746 | 0.000104 | 0.001121 | 0        | 0.000453 | 0.003647 | 0.004114 | 0.000105 | 0.018235 | 0.000171 | 0.00288  | 0.000146 | 0.002551 | 0.001063 | 0.001612 |
| 0.001463 | 0        | 0        | 0        | 0        | 0.000129 | 0.000129 | 0        | 0.000449 | 0        | 0.000137 | 0        | 7.72E-05 | 0.000139 | 0        |
| 0.001822 | 0.000165 | 8.14E-05 | 0        | 0.000354 | 0.000129 | 0.000607 | 0.000118 | 0.000599 | 0        | 0.000451 | 0.000338 | 0.000111 | 0        | 0.00028  |
| 0.543828 | 0.071331 | 0.013848 | 0.00136  | 0.054162 | 0.123591 | 0.203488 | 0.145489 | 0.322312 | 0.035852 | 0.218406 | 0.109767 | 0.11026  | 0.062331 | 0.048168 |
| 0.000338 | 0        | 0        | 0        | 0        | 0        | 0        | 0        | 0        | 0        | 0        | 0        | 0        | 0        | 0        |
| 0        | 9.18E-05 | 0.000563 | 0        | 0        | 0.001577 | 0.001513 | 0.000316 | 0.001292 | 0        | 0.000524 | 0.001532 | 0.000275 | 0.001183 | 0.000759 |
| 0.000358 | 0        | 0        | 0        | 0.000238 | 0.000429 | 0.000232 | 0        | 0        | 0        | 0        | 0        | 0.000337 | 0        | 8.50E-05 |
| 0.002006 | 0.000337 | 0        | 0        | 0.00021  | 0.001727 | 0.001486 | 0        | 0.000707 | 0.000185 | 0.000265 | 0.000291 | 0.001032 | 0.000798 | 0.004583 |
| 0        | 0        | 0        | 0        | 0        | 0.000209 | 0        | 0        | 0        | 0        | 0        | 0        | 0        | 0        | 0        |
| 0        | 8.24E-05 | 0        | 0        | 0.000707 | 0.000129 | 0.002548 | 0        | 0.000306 | 0        | 0.000671 | 0        | 0        | 0.000264 | 5.76E-05 |
| 0        | 0        | 0        | 0        | 0.000619 | 0.000172 | 0        | 0        | 0        | 0        | 0        | 0        | 0        | 0        | 8.77E-05 |
| 0        | 0        | 0        | 0        | 0        | 0        | 0        | 0        | 0        | 0        | 0        | 0        | 0        | 0        | 0        |
| 0.000368 | 0.00041  | 0        | 0        | 0.000387 | 0.00088  | 0.000196 | 0.000153 | 0.001737 | 0.001176 | 0.000142 | 0        | 0        | 0.00239  | 0.000493 |
| 0        | 0        | 0        | 0        | 0        | 0        | 0        | 0        | 0        | 0        | 0        | 0        | 0        | 0        | 0        |
| 0.001187 | 0.000219 | 0        | 0.000308 | 0        | 0.002017 | 0.002619 | 0        | 0        | 0.000246 | 0        | 0        | 0.000744 | 0.000608 | 0.000422 |
| 0        | 0        | 0        | 0        | 0        | 0        | 0        | 0        | 0        | 0        | 0        | 0        | 0        | 0        | 0        |
| 0        | 0        | 0        | 0        | 0        | 0        | 0.00058  | 6.03E-05 | 0        | 0.001114 | 0.000333 | 0.000886 | 0.00012  | 0        | 0        |

|          |          |          |          |          |          |          |          |          |          |          |          |          |          |          |
|----------|----------|----------|----------|----------|----------|----------|----------|----------|----------|----------|----------|----------|----------|----------|
| 0.001996 | 0        | 0        | 0.000125 | 0        | 0.000129 | 0.00083  | 0        | 0.000425 | 0.000198 | 0.000284 | 0        | 0.000429 | 0        | 0        |
| 0        | 0        | 0.000459 | 0.000122 | 0.000917 | 0        | 0.000437 | 5.90E-05 | 0.000919 | 0        | 0.000798 | 0        | 0.000859 | 0.000923 | 0.000104 |
| 0        | 0        | 0        | 0        | 0.002624 | 0.00067  | 0.00361  | 0        | 0.007422 | 0.000943 | 0.000441 | 0.000621 | 0.000355 | 0.000872 | 0        |
| 0        | 0.002501 | 0.005149 | 0.002137 | 0.001254 | 0.001271 | 0.001111 | 0.000343 | 0.0004   | 0.000219 | 0.000602 | 0.002286 | 0.00265  | 0.000942 | 0.003517 |
| 0        | 0.00721  | 0.002626 | 0.006542 | 0.002376 | 0.002853 | 0.000196 | 0.000306 | 0.000425 | 0.001265 | 0.002336 | 0.004396 | 0.001992 | 0.004566 | 0.003583 |
| 0.000225 | 0.001766 | 0.004037 | 0.0031   | 0.001447 | 0.002494 | 0.000714 | 0.000351 | 0.000491 | 0.000561 | 0.000451 | 0.001785 | 0.001949 | 0.000868 | 0.00386  |
| 0.00042  | 0.006445 | 0.007345 | 0.010092 | 0.001044 | 0.000193 | 0.000107 | 0.004503 | 0.000331 | 0        | 0.0007   | 0.001579 | 0.004253 | 0.004552 | 0.003591 |
| 0.000399 | 0.006231 | 0.014523 | 0.019347 | 0.000204 | 0        | 0.000736 | 0.00751  | 0.000473 | 0        | 0.002621 | 0.003745 | 0.008197 | 0.004598 | 0.004808 |
| 0.000809 | 0.002604 | 0.001878 | 0.002873 | 0.001193 | 0.001529 | 0.000986 | 0.000241 | 0.000675 | 0.00039  | 0.00074  | 0.001053 | 0.001745 | 0.000413 | 0.006921 |
| 0.06815  | 0.739974 | 0.171824 | 0.580003 | 0.088198 | 0.12851  | 0.083403 | 0.033273 | 0.090732 | 0.146197 | 0.064398 | 0.131655 | 0.413451 | 0.090608 | 0.523829 |
| 0.003275 | 0.043882 | 0.021331 | 0.045399 | 0.009171 | 0.021497 | 0.013203 | 0.002743 | 0.011237 | 0.004977 | 0.00915  | 0.01168  | 0.038266 | 0.006371 | 0.057891 |
| 0        | 0        | 8.81E-05 | 0        | 0        | 0        | 0.000223 | 0.000214 | 0        | 0        | 0.000113 | 0.000154 | 0        | 0        | 0        |
| 0.000747 | 0.000283 | 0.000246 | 0        | 0        | 0.000118 | 0.000178 | 0.004225 | 0.000272 | 0        | 0.001063 | 0.000128 | 0.000507 | 0.000418 | 0        |
| 0.003295 | 0.003136 | 0.056493 | 0.031626 | 0.010485 | 0.001207 | 0.012355 | 0.135987 | 0.011043 | 0.000212 | 0.039226 | 0.021366 | 0.021998 | 0.0737   | 0.009885 |
| 0.007225 | 0.009939 | 0.241178 | 0.112152 | 0.032395 | 0.005557 | 0.045128 | 0.54904  | 0.056066 | 0.003774 | 0.1575   | 0.081899 | 0.071821 | 0.275082 | 0.046049 |
| 0        | 0.00126  | 0.004834 | 0.001035 | 0.001414 | 0.000569 | 0.000116 | 0.002598 | 9.05E-05 | 0        | 0.001675 | 0.001528 | 0.000275 | 0.008297 | 0.000811 |
| 0.001985 | 0.000374 | 0.001625 | 0.002637 | 0.000204 | 0.000241 | 0.000326 | 0.003524 | 0.000379 | 0        | 0.005961 | 0.001729 | 0.001998 | 0.001689 | 0.001181 |
| 0.000317 | 0        | 0.000685 | 0.001935 | 0.000674 | 0        | 0.000228 | 0.000142 | 0.00039  | 0.000212 | 0.000558 | 0.000282 | 0.001239 | 0        | 7.40E-05 |
| 0.006325 | 0.0004   | 0        | 0        | 0.000204 | 0.000182 | 0        | 0.00048  | 0.000275 | 0        | 0.000186 | 0.000565 | 0.000525 | 0.000186 | 6.85E-05 |
| 0.057158 | 0.005776 | 0.001489 | 0.000117 | 0.060935 | 0.005498 | 0.004698 | 0.001352 | 0.002733 | 0.001825 | 0.00291  | 0.042082 | 0.007997 | 0.011206 | 0.000751 |
| 0.02315  | 0.011411 | 0.000637 | 0.000377 | 0.003464 | 0.000279 | 0.001464 | 0.005734 | 0.001232 | 0.000369 | 0.001563 | 0.004926 | 0.023931 | 0.016681 | 6.85E-05 |
| 0.00919  | 0.003622 | 0.002418 | 0.001524 | 0.007204 | 0.000365 | 0.004948 | 0.013567 | 0.001041 | 0.000219 | 0.004717 | 0.015049 | 0.012837 | 0.01051  | 0.000644 |
| 0.003521 | 0.000118 | 8.81E-05 | 0.002526 | 0.002381 | 0.001631 | 0.000281 | 5.63E-05 | 0.000432 | 0.005305 | 0.000313 | 0.00226  | 0.001835 | 0.000162 | 7.95E-05 |
| 0.001116 | 0.000184 | 7.23E-05 | 0.008413 | 0.000188 | 0.000445 | 0        | 3.48E-05 | 0.000153 | 0.000738 | 0.000671 | 0.001036 | 0.002835 | 0        | 0.000526 |
| 0.00523  | 0        | 0.000542 | 0.033603 | 0.001657 | 0.002891 | 0.002606 | 2.68E-05 | 0.001076 | 0.005852 | 0.000916 | 0.002662 | 0.010779 | 0.000204 | 0.002547 |
| 0.005629 | 0.00081  | 0.001591 | 0.001191 | 0.000779 | 0.006608 | 0.00062  | 0.000269 | 0.00032  | 0.002078 | 0.002934 | 0.001241 | 0.00371  | 0.000501 | 0.003363 |
| 0.011933 | 0.000193 | 0        | 0.000117 | 0.000724 | 0.001545 | 0.00141  | 0.000143 | 0.00173  | 0.000376 | 0.001347 | 0.001862 | 0.001313 | 0        | 7.13E-05 |
| 0.001228 | 0.004796 | 0.000764 | 0        | 0.002961 | 0.007364 | 0.000504 | 0.002242 | 0.001337 | 0.000198 | 0.002919 | 0.003814 | 0.000893 | 0.005452 | 0.000666 |
| 0        | 0.000867 | 0.000226 | 0.001452 | 0.002514 | 0.005573 | 0.000245 | 0.000206 | 0.000672 | 0.005285 | 0.00215  | 0.001246 | 0.000334 | 0.001077 | 8.22E-05 |
| 0.014052 | 0.001491 | 0.000637 | 0.000322 | 0.00079  | 0.002274 | 0.006296 | 0.000201 | 0.004668 | 0.001634 | 0.008023 | 0.000223 | 0.000213 | 0.001814 | 0.00017  |
| 0.002927 | 0.000266 | 7.91E-05 | 0        | 0.001127 | 0.000622 | 0.001321 | 0.000259 | 0.000654 | 0        | 0.001048 | 0.000775 | 0.000244 | 0.00052  | 0.000365 |
| 0.001586 | 0.007603 | 0        | 0.000738 | 0.001376 | 0.00015  | 0.005934 | 0.000272 | 0.012073 | 0        | 0.026906 | 0        | 0.002001 | 0.002167 | 0        |
| 0.003275 | 0.004038 | 8.59E-05 | 0.001504 | 0        | 0.004774 | 9.82E-05 | 0        | 0.000233 | 0.000608 | 0.001117 | 0        | 0.001828 | 0.000691 | 0.003843 |
| 0.005086 | 0.010813 | 0.00615  | 0.005687 | 0.00016  | 0        | 0.001093 | 0.000683 | 0.00588  | 0.000978 | 0.01447  | 0.001263 | 0.011771 | 0.00948  | 0.027804 |

|          |          |          |          |          |          |          |          |          |          |          |          |          |          |          |
|----------|----------|----------|----------|----------|----------|----------|----------|----------|----------|----------|----------|----------|----------|----------|
| HC026    | HC027    | HC149    | HC029    | HC030    | HC031    | HC032    | HC033    | HC034    | HC019    | HC035    | HC018    | HC016    | HC001    | HC002    |
| 0        | 0        | 0        | 0        | 0        | 0        | 0.00011  | 0        | 0        | 0        | 0        | 0        | 0        | 0        | 0.00013  |
| 0        | 0        | 0        | 0        | 0        | 0        | 8.27E-05 | 0        | 6.80E-05 | 0        | 0        | 0        | 0        | 0        | 0.000432 |
| 0        | 0        | 0.000367 | 0.00077  | 0.000141 | 0.001545 | 0.00791  | 0.00013  | 0.000904 | 0        | 8.98E-05 | 0.00041  | 0.000136 | 0        | 0.00122  |
| 0        | 0.000273 | 0.0003   | 0.000643 | 0.000393 | 0.000184 | 0.002221 | 0.002183 | 5.32E-05 | 0        | 0.000124 | 5.53E-05 | 0        | 0        | 0.000842 |
| 0        | 0.000127 | 0.000678 | 0.00132  | 0        | 0.000463 | 0.001276 | 0.000209 | 0.000361 | 0        | 0.000164 | 0.000145 | 0.000126 | 0        | 0.002051 |
| 0        | 0.000117 | 0        | 0.000386 | 0        | 0.000355 | 0.000374 | 0.000324 | 7.23E-05 | 0.000107 | 0.000898 | 0.000257 | 0        | 0.00015  | 0.000425 |
| 0        | 0        | 0        | 0        | 8.22E-05 | 0.00035  | 8.27E-05 | 0        | 0.000174 | 0        | 0.000393 | 0        | 0        | 0.000134 | 0.001473 |
| 0.001178 | 0.005407 | 0.002566 | 0.003492 | 0.004436 | 0.004721 | 0.002815 | 0.001841 | 0.001159 | 0.000193 | 0.004515 | 0.000893 | 0.000506 | 0.000557 | 0.015491 |
| 0.018971 | 0.011189 | 0.025351 | 0.010849 | 0.052479 | 0.073018 | 0.031071 | 0.031587 | 0.01286  | 0.176782 | 0.041098 | 0.021265 | 0.005309 | 0.012402 | 0.014228 |
| 0.004367 | 0.001588 | 0.021941 | 0.011523 | 0.026747 | 0.023814 | 0.036733 | 0.016111 | 0.009409 | 0.024649 | 0.024564 | 0.025237 | 0.007682 | 0.030049 | 0.013031 |
| 0        | 0        | 0.000378 | 0.0014   | 0.001661 | 0.000638 | 0.001421 | 0.001253 | 0.00061  | 0.01483  | 0.001493 | 0.001356 | 0.001264 | 0.002028 | 0.000999 |
| 0        | 0.000125 | 0        | 0.000555 | 0.000211 | 0.001002 | 0.001173 | 0.000244 | 0.000427 | 0.002208 | 0.001387 | 0.000179 | 9.16E-05 | 0.000146 | 0        |
| 0.001511 | 0.00025  | 0.000711 | 0.00227  | 0.004536 | 0.001276 | 0.006728 | 0.001666 | 0.001359 | 0.000781 | 0.004394 | 0.001987 | 0.000243 | 0.001349 | 0.000421 |
| 0.000903 | 0.001119 | 0.000978 | 0.005533 | 0.003051 | 0.000885 | 0.005252 | 0.000749 | 0.001733 | 0.007044 | 0.001127 | 0.001203 | 0.000427 | 0.002706 | 0.000643 |
| 0.007068 | 0.015518 | 0.004855 | 0.028745 | 0.016472 | 0.00512  | 0.042599 | 0.007429 | 0.019752 | 0.053171 | 0.033275 | 0.012889 | 0.003422 | 0.009671 | 0.006936 |
| 0        | 0        | 0        | 0        | 0.026383 | 0.007874 | 0.051631 | 0.035741 | 0.299775 | 0        | 0.039934 | 0        | 0.012548 | 0        | 0.000126 |
| 0        | 0        | 0.000444 | 0.001506 | 9.98E-05 | 0.000993 | 0.000177 | 0        | 0.000523 | 8.20E-05 | 9.91E-05 | 0        | 0.000123 | 0.000723 | 0        |
| 0.006738 | 0.003934 | 0.018286 | 0.027984 | 0.126008 | 0.067036 | 0.01724  | 0.024615 | 0.012376 | 0.02176  | 0.007188 | 0.033689 | 0.036529 | 0.05276  | 0.026451 |
| 0        | 0.000727 | 0        | 0.000231 | 0        | 0.000211 | 0        | 4.13E-05 | 0        | 0        | 0        | 0        | 0        | 0        | 0.000241 |
| 0.000217 | 0.013438 | 0        | 0.002642 | 0.000575 | 0.000409 | 0.001957 | 0.000102 | 0.000221 | 0        | 0        | 0.000183 | 0.000221 | 0.000341 | 0.00365  |
| 0.003018 | 0.023095 | 0.006088 | 0.011434 | 0.007406 | 0.006046 | 0.013091 | 0.002656 | 0.00498  | 0.014363 | 0.021743 | 0.032571 | 0.00346  | 0.005608 | 0.012001 |
| 0        | 0        | 0.000344 | 3.99E-05 | 0.000141 | 0        | 0.000205 | 0        | 0.000215 | 0.00183  | 9.60E-05 | 0.000285 | 0        | 0        | 0.000555 |
| 0.000806 | 0        | 0        | 0.000788 | 0        | 0        | 0        | 0        | 0        | 0.00133  | 0        | 0.002121 | 0        | 0.001845 | 0.003397 |
| 0.000969 | 0.008102 | 0.007799 | 0.01882  | 0.047274 | 0.00742  | 0.033115 | 0.017748 | 0.078415 | 0.176664 | 0.060453 | 0.017769 | 0.004876 | 0.008249 | 0.019205 |
| 0.000674 | 0.00631  | 0.006532 | 0.002582 | 0.003615 | 0.000337 | 0.005244 | 0.000593 | 0.005928 | 0.003809 | 0.022452 | 0.002157 | 0.001526 | 0.004498 | 0.029921 |
| 0        | 0.006771 | 0.004788 | 0.001464 | 0.00213  | 0.000534 | 0.00252  | 0.000409 | 0.001059 | 0.00031  | 0.005546 | 0.00058  | 0.001059 | 0.001776 | 0.037068 |
| 0.00105  | 0.000385 | 0.000755 | 0.001229 | 0.000704 | 0.000139 | 0.000417 | 5.39E-05 | 0.000279 | 8.56E-05 | 0.000489 | 0.000376 | 0.000126 | 0.00013  | 0.007782 |
| 0.000973 | 0.001647 | 0.003255 | 0.003255 | 0.007101 | 0.0049   | 0.008839 | 0.000942 | 0.015657 | 0.005411 | 0.008166 | 0.005704 | 0.001545 | 0.001475 | 0.027519 |
| 0.001957 | 0.00478  | 0.012376 | 0.005362 | 0.007288 | 0.004276 | 0.017599 | 0.001219 | 0.008155 | 0.019466 | 0.025171 | 0.008567 | 0.002041 | 0.006205 | 0.056763 |
| 0.006525 | 0.018993 | 0.019086 | 0.023368 | 0.079884 | 0.043415 | 0.088006 | 0.008568 | 0.06991  | 0.049904 | 0.104357 | 0.060507 | 0.009932 | 0.021085 | 0.37779  |
| 0.000457 | 0.002687 | 0.002411 | 0.005671 | 0.010639 | 0.004325 | 0.007988 | 0.002478 | 0.033586 | 0.020105 | 0.013069 | 0.002389 | 0.001631 | 0.004531 | 0.022048 |
| 0.000453 | 0.001341 | 0.001855 | 0.002414 | 0.005234 | 0.002843 | 0.005071 | 0.002627 | 0.001944 | 0.018154 | 0.001855 | 0.002703 | 0.00122  | 0.002515 | 0.020491 |
| 0.000701 | 0.001456 | 0.009232 | 0.000794 | 0.002435 | 0.000808 | 0.002287 | 0.000689 | 0.000276 | 0.000168 | 0.001678 | 0.000142 | 0.002597 | 0.002475 | 0.009561 |
| 0.00136  | 0.004778 | 0.003033 | 0.005253 | 0.003134 | 0.000894 | 0.002173 | 0.003843 | 0.000198 | 0.000849 | 0.002697 | 0.0004   | 0.001138 | 0.002324 | 0.008696 |
| 0.000488 | 0.006537 | 0.000322 | 0.000479 | 0.001244 | 0.000368 | 0.000248 | 0        | 0        | 0.000125 | 0.001508 | 0.000219 | 0.000758 | 0.000118 | 0.003952 |
| 0.002154 | 0.184711 | 0.003533 | 0.047698 | 0.031324 | 0.004074 | 0.030512 | 0.000514 | 0.011691 | 0.014562 | 0.025344 | 0.002922 | 0.031208 | 0.013344 | 0.099646 |
| 0.004762 | 0.175019 | 0.004299 | 0.058706 | 0.030714 | 0.006859 | 0.036198 | 0.000187 | 0.006128 | 0.027063 | 0.028407 | 0.00451  | 0.032039 | 0.015421 | 0.127754 |
| 0        | 0.000148 | 0.001233 | 0.000271 | 0.000681 | 0.000508 | 0.000945 | 0.000146 | 0.000191 | 0.000663 | 0.001499 | 0.000718 | 0.000765 | 0.001755 | 0.001699 |
| 0.000508 | 0.000642 | 0.003511 | 0.000688 | 0.000493 | 0.00035  | 0.00174  | 0.000387 | 0.000164 | 0.000745 | 0.001037 | 0.000542 | 0.000885 | 0.002178 | 0.004465 |
| 0.002088 | 0        | 0.001133 | 0.005165 | 0.001473 | 0.001038 | 0.001984 | 0.020899 | 9.14E-05 | 0.000292 | 0.01108  | 0.002359 | 0.002016 | 0.000248 | 0        |
| 0.000655 | 0        | 0        | 0.000934 | 0        | 0        | 0        | 0.000381 | 0        | 0        | 0.000653 | 8.29E-05 | 0        | 0.00013  | 0        |
| 0.000802 | 0        | 0.0015   | 0.002347 | 0.000288 | 0.000629 | 0.00072  | 0.000866 | 0        | 0        | 0.001517 | 0.000478 | 0.000117 | 0.000102 | 0.000149 |
| 0.294706 | 0.007959 | 0.187324 | 0.453427 | 0.196984 | 0.310322 | 0.282592 | 0.058646 | 0.056607 | 0.227941 | 0.234006 | 0.238917 | 0.086839 | 0.139425 | 0.005019 |
| 0.000198 | 0        | 0        | 0        | 0        | 0.000234 | 0        | 0        | 7.02E-05 | 0        | 0        | 6.16E-05 | 0        | 0        | 0        |
| 0.001341 | 0        | 0.000333 | 0.000537 | 0.000898 | 0.000966 | 0.003795 | 0.001415 | 0.00041  | 0.005778 | 0.001378 | 0.008435 | 0.001668 | 0.000492 | 0.000142 |
| 0        | 0        | 0        | 6.43E-05 | 9.98E-05 | 0.000418 | 8.66E-05 | 0.004382 | 0        | 0        | 8.98E-05 | 0.000958 | 0        | 0.000158 | 0        |
| 0.003011 | 0        | 0        | 0.000319 | 0.000246 | 0.001177 | 0.000961 | 0.035344 | 0.000274 | 9.99E-05 | 0.000523 | 0.00435  | 0.000465 | 0.000268 | 0.000165 |
| 0        | 0        | 0.000455 | 0        | 0        | 0        | 0        | 0        | 0        | 0        | 0        | 0        | 0        | 0        | 0        |
| 0        | 0        | 0        | 0.00012  | 0        | 0        | 0.000213 | 0.001768 | 0        | 0.000182 | 0.000533 | 0.000187 | 0        | 0.000293 | 0        |
| 0        | 0        | 0        | 0        | 0        | 0.000112 | 0        | 0.000184 | 0        | 0        | 8.67E-05 | 0.000213 | 0.000638 | 0        | 0        |
| 0        | 0.00013  | 0        | 0        | 0        | 0        | 0        | 0        | 0        | 0        | 0        | 0        | 0        | 0        | 0        |
| 0.000422 | 0.00028  | 0        | 0.001722 | 0        | 0.000202 | 0.00037  | 0.000378 | 0.000391 | 0.000481 | 0        | 0.000567 | 0.00098  | 0.036311 | 0.000287 |
| 0        | 0        | 0        | 0        | 0        | 0        | 0        | 0        | 0        | 0        | 0        | 0        | 0        | 0        | 0        |
| 0.000407 | 0        | 0.000778 | 0.000475 | 0.001702 | 0.004581 | 0.00237  | 0.001155 | 0.000159 | 0        | 0.002295 | 0.000708 | 0        | 0.001308 | 0.000138 |
| 0.000403 | 0        | 0        | 0        | 8.80E-05 | 0.000624 | 0        | 0        | 0        | 0        | 9.29E-05 | 0.00021  | 0        | 0        | 0        |
| 0.000449 | 0.00014  | 0.000433 | 0.000694 | 0.00061  | 0.001267 | 0.003654 | 0.000121 | 0.003768 | 0.000802 | 0.000316 | 0.000712 | 0        | 0.000244 | 0.000367 |

|          |          |          |          |          |          |          |          |          |          |          |          |          |          |          |
|----------|----------|----------|----------|----------|----------|----------|----------|----------|----------|----------|----------|----------|----------|----------|
| 0        | 0        | 0.000355 | 0.000166 | 0        | 0.001123 | 0        | 0.000117 | 0.000344 | 0.000114 | 0.00026  | 0.000563 | 0.00127  | 0.000276 | 0        |
| 0        | 0        | 0.001855 | 0.000102 | 0.004137 | 0.034023 | 0.004362 | 0.001672 | 0.027448 | 0        | 0.000322 | 0.001109 | 0.006355 | 0.003438 | 0.001905 |
| 0        | 0        | 0        | 0.000229 | 0.001279 | 0.010672 | 0.01217  | 0.013258 | 0.06177  | 0        | 0.004555 | 0.001075 | 0.002522 | 0.002759 | 0.002923 |
| 0.000438 | 0.001328 | 0.002533 | 0.000854 | 0.00091  | 0.000678 | 0.000165 | 0.00053  | 0.000136 | 0        | 0.000338 | 0.000788 | 0.000243 | 0.001044 | 0.001251 |
| 0.000608 | 0.001038 | 0.002866 | 0.000446 | 0.000393 | 0.000328 | 6.69E-05 | 0.00085  | 7.44E-05 | 0.000182 | 0.001911 | 0.000939 | 0.002026 | 0.002085 | 0.000111 |
| 0.000814 | 0.000788 | 0.0029   | 0.001036 | 0.000334 | 0.000701 | 4.33E-05 | 0.00192  | 0.000123 | 0        | 0.001471 | 0.001358 | 0.001305 | 0.001211 | 0.000356 |
| 0.006955 | 0.005986 | 0.002844 | 0.001524 | 0.001168 | 0.0011   | 9.84E-05 | 0.000301 | 0.000179 | 0        | 0.000542 | 0.001222 | 0.006686 | 0.004185 | 9.56E-05 |
| 0.011028 | 0.012915 | 0.006854 | 0.002003 | 0.001033 | 0.003045 | 0.000193 | 0.000733 | 0        | 0        | 0.001805 | 0.003354 | 0.008611 | 0.006851 | 0        |
| 0.001294 | 0.000127 | 0.002844 | 0.000719 | 0.00115  | 0.000629 | 8.66E-05 | 0.002729 | 0.000123 | 0        | 0.000372 | 0.00204  | 0.001134 | 0.001597 | 0        |
| 0.258047 | 0.072407 | 0.368494 | 0.101406 | 0.136342 | 0.15104  | 0.020965 | 0.463596 | 0.006266 | 0.009583 | 0.084051 | 0.227126 | 0.375557 | 0.26555  | 0.007915 |
| 0.036264 | 0.008607 | 0.043815 | 0.013584 | 0.013831 | 0.005013 | 0.002331 | 0.013134 | 0.000602 | 0.000542 | 0.006243 | 0.018634 | 0.021466 | 0.031102 | 0.000608 |
| 0.000911 | 0.000245 | 0.000378 | 0.000519 | 0        | 0.000359 | 0.000252 | 0        | 0        | 0        | 5.26E-05 | 9.78E-05 | 0        | 0.000244 | 0        |
| 0.003487 | 0.000546 | 0.000256 | 0.001584 | 0.000211 | 0.000921 | 0.000472 | 0        | 8.29E-05 | 0        | 0.000647 | 0.000391 | 0.000799 | 0.000687 | 0        |
| 0.042773 | 0.076606 | 0.013242 | 0.016146 | 0.017546 | 0.023688 | 0.026434 | 0.001923 | 0.053962 | 0.001266 | 0.029045 | 0.035079 | 0.062362 | 0.037355 | 0.002341 |
| 0.117351 | 0.27051  | 0.024707 | 0.059319 | 0.052573 | 0.070916 | 0.139373 | 0.006499 | 0.17916  | 0.005257 | 0.08411  | 0.176523 | 0.182749 | 0.122269 | 0.008084 |
| 0.000659 | 0.002939 | 0        | 0.000484 | 0.000258 | 0        | 0.000512 | 0        | 0.000865 | 0        | 0.001304 | 0.0003   | 0.001008 | 0.000971 | 0.000241 |
| 0.003274 | 0.007972 | 0.002189 | 0.001602 | 0.000728 | 0.001177 | 0.000524 | 0.00033  | 0.000453 | 0        | 0.000994 | 0.000555 | 0.001969 | 0.00102  | 0.000406 |
| 0.00224  | 0.001272 | 0.004044 | 0.000595 | 9.98E-05 | 0.001047 | 0.000417 | 0        | 0.000121 | 0        | 0.000576 | 0.000111 | 0.001785 | 0.001885 | 0.000371 |
| 0.00298  | 0        | 0.006099 | 0.000881 | 0.001579 | 0.000966 | 0        | 0        | 0        | 0        | 7.12E-05 | 0.000378 | 0.000683 | 0.001317 | 0        |
| 0.009408 | 0.001838 | 0.064389 | 0.002966 | 0.031348 | 0.013784 | 0.006803 | 0.001101 | 0.000442 | 0        | 0.003747 | 0.002669 | 0.00437  | 0.006319 | 0.0015   |
| 0.079758 | 0.010718 | 0.008821 | 0.007093 | 0.001508 | 0.005812 | 0.002232 | 0        | 0        | 8.20E-05 | 0.003075 | 0.006737 | 0.005084 | 0.008432 | 0.00013  |
| 0.029436 | 0.007798 | 0.021374 | 0.003286 | 0.00676  | 0.010398 | 0.005311 | 0.000232 | 0.000498 | 0        | 0.002858 | 0.007294 | 0.021911 | 0.019712 | 0.000115 |
| 0.000248 | 0.000979 | 0.002211 | 0.000865 | 0.006426 | 0.003041 | 0.000106 | 0.001146 | 0.000242 | 0        | 0.001025 | 0        | 0.001299 | 0.002552 | 0.002043 |
| 0.000632 | 0.000237 | 0.006732 | 0.000918 | 0.000986 | 0.002246 | 0.000102 | 0.001434 | 0        | 0        | 0.000468 | 2.76E-05 | 0.001728 | 0.00308  | 0.000168 |
| 0.006494 | 0.00182  | 0.021363 | 0.003048 | 0.005099 | 0.004887 | 0.000366 | 0.007727 | 5.95E-05 | 9.27E-05 | 0.002292 | 0.000946 | 0.008902 | 0.009427 | 0.000658 |
| 0.002573 | 0.001994 | 0.000678 | 0.002338 | 0.000188 | 0.000458 | 0.001106 | 0.000962 | 5.10E-05 | 0.000539 | 0.003326 | 0.000499 | 0.001128 | 0.001499 | 0.00109  |
| 0.002805 | 0        | 0.006399 | 0.002416 | 0.001708 | 0.004864 | 0.002122 | 0.000609 | 0.000408 | 0.000203 | 0.003837 | 0.000149 | 0.000967 | 0.00349  | 0.000142 |
| 0.001193 | 0.000487 | 0.001877 | 0.002651 | 0.000593 | 0.000355 | 0.00126  | 0.00013  | 0.00013  | 0.000813 | 0.004178 | 0.000956 | 0.000679 | 0.001629 | 0.000272 |
| 0.000446 | 0.000744 | 0.000378 | 0.000175 | 0.000487 | 0.000431 | 0.000169 | 0.000105 | 5.53E-05 | 0.002186 | 0.002369 | 0        | 0.00012  | 0.00041  | 0.000134 |
| 0.001066 | 0        | 0.002877 | 0.006332 | 0.001326 | 0.004487 | 0.004354 | 0.001996 | 0.001053 | 0.016774 | 0.001895 | 0.002274 | 0.009698 | 0.002085 | 0.000497 |
| 0.000678 | 0        | 0.001166 | 0.001923 | 0.000452 | 0.000876 | 0.001083 | 0.000524 | 7.44E-05 | 0.003178 | 0.001756 | 0.00068  | 0.002718 | 0.00052  | 0.000241 |
| 0.000686 | 0.000107 | 0.010576 | 0.005855 | 0.001579 | 0.009513 | 0.00263  | 0.183328 | 0.000736 | 0.052033 | 0.010569 | 0.000833 | 0.000411 | 0.063759 | 0.000226 |
| 0.00026  | 0        | 0.000322 | 0.000131 | 0.000288 | 0.000921 | 0        | 0.000203 | 0.000136 | 0.014284 | 0.00105  | 0.001226 | 0.000733 | 0.000374 | 0        |
| 0.002906 | 0.00027  | 0.005299 | 0.000836 | 0.000575 | 0.030946 | 9.06E-05 | 8.57E-05 | 0.00202  | 8.20E-05 | 0        | 0.000897 | 0.003568 | 0.00334  | 0.000811 |

| HC003    | HC004    | HC005    | HC006    | HC007    | HC008    | HC009    | HC010    | HC011    | HC012    | HC013    | HC014    | HC015    | HC017    | HC074    |
|----------|----------|----------|----------|----------|----------|----------|----------|----------|----------|----------|----------|----------|----------|----------|
| 0        | 0        | 0        | 0        | 0        | 8.35E-05 | 0        | 0        | 0        | 0        | 0.000465 | 0.000228 | 0.000103 | 0.000383 | 0        |
| 0        | 0        | 0        | 0        | 0.000249 | 6.68E-05 | 0        | 0        | 0        | 0        | 0.000391 | 0        | 0        | 0        | 0        |
| 0        | 0        | 0.000359 | 0        | 0.007704 | 0.006869 | 7.38E-05 | 0.000464 | 0.000157 | 0        | 0.023306 | 0.017923 | 0.002831 | 0.004598 | 0        |
| 0        | 0        | 0.000127 | 0        | 0.002809 | 0.001066 | 0        | 8.29E-05 | 0        | 5.13E-05 | 0.003564 | 0.000862 | 0.000842 | 0.001674 | 0        |
| 0        | 0        | 0.000112 | 0        | 0.003638 | 0.001844 | 0        | 6.76E-05 | 0        | 0        | 0.023785 | 0.005654 | 0.002096 | 0.004054 | 0        |
| 0.000469 | 0.0002   | 0.001424 | 6.54E-05 | 0.000525 | 0        | 0        | 4.61E-05 | 0.000715 | 0.00032  | 0.001343 | 0.0004   | 0.000678 | 0.001354 | 0        |
| 0        | 0        | 0.000178 | 0        | 0.00064  | 0        | 0        | 6.14E-05 | 0.00016  | 0        | 0.000694 | 0.000554 | 0.000168 | 0.000298 | 0        |
| 0.005488 | 0.003956 | 0.007204 | 0.001774 | 0.002118 | 0.001633 | 8.01E-05 | 0.000808 | 0.001696 | 0.000863 | 0.005254 | 0.00422  | 0.004146 | 0.001897 | 0.001029 |
| 0.028381 | 0.014072 | 0.033861 | 0.00973  | 0.05173  | 0.022971 | 0.042818 | 0.030992 | 0.02534  | 0.019006 | 0.044331 | 0.016562 | 0.050395 | 0.034541 | 0.00832  |
| 0.037457 | 0.005916 | 0.063935 | 0.006733 | 0.026745 | 0.022482 | 0.013834 | 0.035774 | 0.01675  | 0.009967 | 0.04149  | 0.032254 | 0.023621 | 0.020886 | 0.008546 |
| 0.003025 | 0.000271 | 0.001895 | 0.001871 | 0.003486 | 0.002267 | 0.001239 | 0.003504 | 0.000764 | 0.000914 | 0.003513 | 0.002955 | 0.011099 | 0.009095 | 0.001463 |
| 0.000165 | 0        | 0        | 0.000371 | 0.000424 | 0.00069  | 0.000775 | 0.000682 | 0.00105  | 0.000397 | 0.000184 | 0.000105 | 0.000627 | 0.001086 | 0        |
| 0.000344 | 0.000489 | 0.000515 | 0.000861 | 0.000806 | 0.003742 | 0.001281 | 0.004044 | 0.008495 | 0.002547 | 0.0009   | 0.005196 | 0.002976 | 0.002708 | 0.000507 |
| 0.001117 | 0.000172 | 0.001344 | 0.000778 | 0.000829 | 0.00133  | 0.002722 | 0.003731 | 0.001583 | 0.000336 | 0.005904 | 0.00622  | 0.002021 | 0.002909 | 0.000422 |
| 0.008321 | 0.004421 | 0.022801 | 0.010228 | 0.007773 | 0.011392 | 0.031311 | 0.049948 | 0.032558 | 0.01442  | 0.017926 | 0.022851 | 0.021543 | 0.016292 | 0.010981 |
| 0        | 0        | 0        | 0        | 0.012203 | 0.000957 | 0.000367 | 0.095615 | 0.073688 | 0.019576 | 0.039401 | 0.126115 | 0.017673 | 0.009065 | 0        |
| 0        | 7.49E-05 | 0.00013  | 5.83E-05 | 0.00087  | 0.00084  | 0        | 0        | 0.000626 | 0.000154 | 0.000576 | 0        | 0.000168 | 0        | 0        |
| 0.173439 | 0.113372 | 0.053676 | 0.01005  | 0.055405 | 0.114484 | 0.039054 | 0.114217 | 0.023257 | 0.091543 | 0.021498 | 0.000502 | 0.038608 | 0.015269 | 0.131977 |
| 0.000711 | 6.16E-05 | 0.001044 | 0        | 0        | 0        | 0        | 0.00043  | 0.000118 | 0.000828 | 0.000199 | 0.000111 | 0        | 0        | 0.000803 |
| 0.005519 | 0.000381 | 0.003493 | 0        | 0.001105 | 0.000287 | 0.000415 | 0.001609 | 0.004625 | 0.001038 | 0        | 0.000369 | 0        | 0.00221  | 0.005093 |
| 0.007364 | 0.01566  | 0.008784 | 0.01818  | 0.004462 | 0.013023 | 0.010357 | 0.002558 | 0.01396  | 0.013126 | 0.00507  | 0.00542  | 0.008727 | 0.013744 | 0.005655 |
| 0.000751 | 0.000326 | 0.003707 | 0.000502 | 0        | 0.000453 | 0.001671 | 7.68E-05 | 8.11E-05 | 0        | 0.000162 | 0.000139 | 0        | 0        | 0.000361 |
| 0.000938 | 0.000337 | 0.006095 | 0.000309 | 0        | 0.10591  | 0.535785 | 0        | 0        | 0        | 0        | 0.047809 | 0.002368 | 0.000353 | 0.00023  |
| 0.126772 | 0.019244 | 0.093136 | 0.124352 | 0.035314 | 0.016386 | 0.011726 | 0.042937 | 0.006818 | 0.017954 | 0.060065 | 0.054399 | 0.028136 | 0.013532 | 0.014947 |
| 0.044584 | 0.015869 | 0.02458  | 0.020753 | 0.000368 | 0.002626 | 3.79E-05 | 0.002883 | 0.000353 | 0.004052 | 0.005778 | 0.010687 | 0.003935 | 0.002176 | 0.00348  |
| 0.013437 | 0.006715 | 0.00803  | 0.003654 | 0.000907 | 0.000476 | 0        | 0.000884 | 0.000783 | 0.000816 | 0.004908 | 0.003558 | 0.000566 | 0.001692 | 0.001041 |
| 0.001644 | 0.000821 | 0.001714 | 0.001115 | 0.00017  | 9.18E-05 | 0.000133 | 7.68E-05 | 0        | 7.00E-05 | 0.0009   | 0.000277 | 0.00051  | 0.00051  | 0.00016  |
| 0.012696 | 0.010708 | 0.006914 | 0.003957 | 0.00349  | 0.00715  | 0.002126 | 0.00289  | 0.005967 | 0.00387  | 0.005476 | 0.006442 | 0.004277 | 0.003511 | 0.001705 |
| 0.021141 | 0.011439 | 0.033865 | 0.010999 | 0.023871 | 0.006838 | 0.00425  | 0.007668 | 0.004554 | 0.00669  | 0.027593 | 0.018563 | 0.011244 | 0.008566 | 0.003295 |
| 0.059067 | 0.042012 | 0.161398 | 0.044192 | 0.060981 | 0.036428 | 0.031351 | 0.023743 | 0.055482 | 0.035146 | 0.11771  | 0.113382 | 0.058013 | 0.037428 | 0.009513 |
| 0.058263 | 0.00937  | 0.011006 | 0.015312 | 0.004876 | 0.007745 | 0.000162 | 0.003074 | 0.000856 | 0.002655 | 0.010753 | 0.021342 | 0.009564 | 0.006755 | 0.004484 |
| 0.004174 | 0.001596 | 0.007798 | 0.001742 | 0.002786 | 0.002916 | 0.001174 | 0.000537 | 0.002102 | 0.000809 | 0.007638 | 0.022789 | 0.004071 | 0.002507 | 0.000386 |
| 0.008584 | 0.000804 | 0.003631 | 6.89E-05 | 0.000898 | 0.00027  | 4.85E-05 | 0.000442 | 0.000764 | 0.000173 | 0.002052 | 0.000529 | 0.001717 | 0.000658 | 0.001093 |
| 0.008669 | 0.001669 | 0.005722 | 0.000846 | 0.003403 | 0.000913 | 0.000122 | 0.00039  | 0.000256 | 0.000718 | 0.006066 | 0.003924 | 0.004052 | 0.002916 | 0.002449 |
| 0.001032 | 0.002721 | 0.001116 | 0.004725 | 0.000244 | 0.00175  | 0        | 0.000224 | 0        | 6.06E-05 | 0.001668 | 0.001219 | 0.000323 | 0.000417 | 0.000794 |
| 0.039468 | 0.044083 | 0.02295  | 0.085503 | 0.003352 | 0.086497 | 0.000596 | 0.007873 | 0.010728 | 0.002981 | 0.158262 | 0.132437 | 0.007856 | 0.005535 | 0.017121 |
| 0.041836 | 0.041052 | 0.032306 | 0.08703  | 0.003173 | 0.156064 | 0.001435 | 0.012065 | 0.014458 | 0.003476 | 0.212711 | 0.235772 | 0.010921 | 0.008477 | 0.018504 |
| 0.001743 | 0.000909 | 0.003287 | 0.000935 | 0.000926 | 0.000348 | 8.43E-05 | 0.001084 | 0.00033  | 0.000329 | 0.001137 | 0.000939 | 0.000884 | 0.000807 | 0.000427 |
| 0.006346 | 0.000605 | 0.003584 | 0.000592 | 0        | 0.000309 | 0        | 0.000869 | 0.000204 | 0.000198 | 0.00107  | 0.000511 | 0.000505 | 0.000298 | 0.000621 |
| 0.000349 | 0.000163 | 0.002544 | 0.000209 | 0.009375 | 0.00158  | 0.000504 | 0.003381 | 0.01653  | 0.003434 | 0.000775 | 0.001702 | 0.006237 | 0.008035 | 0.002255 |
| 0        | 0        | 0        | 0        | 0        | 0        | 0        | 5.53E-05 | 0.000361 | 0.000245 | 0        | 0        | 0.001418 | 0.002325 | 0.000244 |
| 0        | 6.82E-05 | 0.000145 | 0        | 0.000382 | 0        | 4.43E-05 | 0.000424 | 0.000869 | 0.000404 | 0        | 0        | 0.000688 | 0.003675 | 0.000167 |
| 0.058491 | 0.091645 | 0.036474 | 0.025333 | 0.203324 | 0.06932  | 0.183908 | 0.212313 | 0.145656 | 0.205297 | 0.022959 | 0.050204 | 0.36639  | 0.443353 | 0.055335 |
| 0        | 5.94E-05 | 0        | 0        | 0.00023  | 0.00027  | 0.000306 | 0        | 0        | 0        | 0        | 0        | 0        | 0.000789 | 0        |
| 0.000916 | 0.000308 | 0.000141 | 0.000915 | 0.001644 | 0.001071 | 0.000373 | 0.001508 | 0.001073 | 0.000791 | 0.000561 | 0.000108 | 0.006294 | 0.001053 | 0.000345 |
| 0        | 0        | 0        | 0        | 0        | 0        | 3.37E-05 | 6.76E-05 | 0.000186 | 0        | 0        | 0        | 0.000304 | 0.000268 | 0        |
| 0        | 6.60E-05 | 0.000315 | 0        | 0.000244 | 0.000273 | 0.00012  | 0.000206 | 0.001644 | 0.001873 | 0.000214 | 0.000502 | 0.01196  | 0.00051  | 0.000169 |
| 0        | 0        | 0        | 0        | 0        | 0        | 0        | 0        | 0        | 0        | 0        | 0        | 0        | 0.000164 | 0        |
| 0        | 0.000121 | 0        | 5.65E-05 | 0        | 9.18E-05 | 0        | 0.000224 | 0.000424 | 0.000196 | 0.001107 | 0.004642 | 0.000426 | 0.000714 | 9.13E-05 |
| 0        | 0        | 0.000152 | 0        | 0.000428 | 0        | 0.000107 | 0        | 0.000209 | 0        | 0.000177 | 0        | 0.00043  | 0.003251 | 8.22E-05 |
| 0        | 0        | 0        | 0        | 0        | 0.000211 | 0        | 0        | 0        | 0        | 0        | 0        | 0        | 0        | 0        |
| 0.000147 | 0        | 0.002359 | 0.000265 | 0.000249 | 0.002868 | 0.000731 | 0.00031  | 0.001178 | 0.000868 | 0.000376 | 0.000126 | 0.000393 | 0        | 0.00107  |
| 0        | 0        | 0        | 0        | 0.000207 | 0        | 0        | 0        | 0        | 0        | 0        | 0        | 0        | 0        | 0        |
| 0        | 0        | 0.001714 | 0        | 0.0085   | 0.001219 | 0.000141 | 0.000347 | 0.001725 | 0.000294 | 0        | 0        | 0.002527 | 0.00228  | 0        |
| 0        | 0        | 0        | 0        | 0.001349 | 0.000581 | 0        | 0        | 6.80E-05 | 0        | 0        | 0        | 0        | 0.000922 | 0        |
| 0        | 0        | 0.000446 | 7.25E-05 | 0.003122 | 0.012149 | 0.000759 | 0.000304 | 0.000523 | 0.000259 | 0.001351 | 0.000295 | 0.001628 | 0.003656 | 0        |

|          |          |          |          |          |          |          |          |          |          |          |          |          |          |          |
|----------|----------|----------|----------|----------|----------|----------|----------|----------|----------|----------|----------|----------|----------|----------|
| 0        | 0        | 0.000138 | 0        | 0.028688 | 0.008204 | 0.000373 | 0        | 0.000141 | 0.000126 | 0.000996 | 0        | 0.000838 | 0        | 0.000246 |
| 0        | 0.00039  | 0        | 0.000223 | 0.014933 | 0.015415 | 0.000375 | 0        | 0.000335 | 0.000315 | 0.000332 | 0        | 0.003491 | 0.008172 | 0.000623 |
| 0.00034  | 0.000238 | 0.001366 | 0.000353 | 0.012502 | 0.056192 | 0.000961 | 0.000593 | 0.000144 | 0.001372 | 0.001557 | 0.000126 | 0.010229 | 0.003675 | 0.000185 |
| 0.002096 | 0.003809 | 0.002939 | 0.002985 | 0.001165 | 0        | 0        | 0.000534 | 0.000945 | 0.001472 | 0        | 0        | 0.001226 | 0.000859 | 0.001228 |
| 0.005769 | 0.007014 | 0.002982 | 0.003396 | 0.000295 | 0.000117 | 0        | 0.001431 | 0.000123 | 0.003896 | 0.000192 | 0        | 0.001025 | 0.000588 | 0.005518 |
| 0.002409 | 0.004559 | 0.00254  | 0.002744 | 0.000419 | 0        | 5.90E-05 | 0.001062 | 0.000471 | 0.000707 | 0        | 0        | 0.00095  | 0.00029  | 0.001805 |
| 0.000979 | 0.002741 | 0.001529 | 0.006044 | 0.001216 | 7.51E-05 | 0        | 0.001293 | 0.002193 | 0.003473 | 0        | 0        | 0.001142 | 0.000737 | 0.004509 |
| 0.000541 | 0.005171 | 0.002377 | 0.013586 | 0.00221  | 7.51E-05 | 0        | 0.001649 | 0.002117 | 0.002286 | 0.000192 | 0        | 0.001011 | 0.000796 | 0.008418 |
| 0.000357 | 0.001922 | 0.001018 | 0.000845 | 0.00186  | 0        | 0.00016  | 0.000786 | 0.003219 | 0.001085 | 0.00014  | 0        | 0.001549 | 0.0008   | 0.002437 |
| 0.130249 | 0.400267 | 0.185395 | 0.12981  | 0.186258 | 0.010814 | 0.031319 | 0.182491 | 0.257364 | 0.401438 | 0.010546 | 0.004266 | 0.103064 | 0.148744 | 0.425071 |
| 0.007516 | 0.030667 | 0.009328 | 0.014512 | 0.02523  | 0.000843 | 0.003053 | 0.011005 | 0.049709 | 0.016445 | 0.002192 | 0.000782 | 0.011745 | 0.008035 | 0.028422 |
| 0        | 0.000176 | 0.000286 | 7.25E-05 | 0.000502 | 0        | 0        | 5.53E-05 | 0.000144 | 4.67E-05 | 0        | 0        | 0        | 0.000264 | 0.00011  |
| 0        | 0.000443 | 0.000141 | 0.000611 | 0.000428 | 8.35E-05 | 0        | 0.000243 | 0.000709 | 0.000681 | 0        | 0        | 0.000898 | 0.000275 | 0.000169 |
| 0.004049 | 0.009764 | 0.01759  | 0.065894 | 0.017867 | 0.022279 | 0.005546 | 0.020865 | 0.034749 | 0.013889 | 0.019845 | 0.000825 | 0.016681 | 0.005978 | 0.025206 |
| 0.018813 | 0.040352 | 0.065363 | 0.241907 | 0.057016 | 0.133165 | 0.022357 | 0.068615 | 0.119259 | 0.040112 | 0.055718 | 0.001748 | 0.044303 | 0.021891 | 0.089204 |
| 0.001014 | 0.001345 | 0.001163 | 0.004137 | 0        | 0.000209 | 0        | 0.000267 | 0        | 0.000667 | 0.000531 | 0        | 0.000225 | 0        | 0.001235 |
| 0.000197 | 0.001847 | 0.000594 | 0.003304 | 0.001073 | 0.0002   | 0        | 7.68E-05 | 0.000576 | 0.000198 | 0.000406 | 0        | 0.000795 | 0.000123 | 0.001921 |
| 0.001305 | 0.00013  | 0.000261 | 0.00012  | 0.000677 | 0.0001   | 0.000126 | 6.14E-05 | 8.11E-05 | 0.000278 | 0        | 0        | 0.001268 | 0.000272 | 0.000728 |
| 0        | 5.06E-05 | 0.000127 | 0.000125 | 0.001658 | 0        | 0        | 0.000147 | 8.11E-05 | 0.000229 | 0        | 0        | 0.001362 | 0.001216 | 0.000406 |
| 0.003821 | 0.001585 | 0.006704 | 0.003236 | 0.026321 | 0.00062  | 0        | 0.00441  | 0.001081 | 0.006545 | 0.001048 | 0        | 0.016971 | 0.006718 | 0.005794 |
| 0.000295 | 0.003478 | 0.002776 | 0.003246 | 0.012525 | 0.002112 | 0        | 0.001247 | 0.000552 | 0.002885 | 0.000723 | 0        | 0.002634 | 0.000826 | 0.008555 |
| 0.001618 | 0.001506 | 0.002243 | 0.004492 | 0.009408 | 0.002342 | 8.85E-05 | 0.00397  | 0.002492 | 0.004395 | 0.000583 | 0        | 0.008947 | 0.00347  | 0.013792 |
| 0.010604 | 0.000577 | 0.003943 | 0.000161 | 0.001529 | 0.001024 | 0.000185 | 0.001609 | 0.000908 | 0.000826 | 0.001314 | 0        | 0.0016   | 0.000253 | 0.005276 |
| 0.001207 | 0.000264 | 0.001399 | 5.83E-05 | 0.001303 | 0        | 5.48E-05 | 0.000445 | 0.001188 | 0.000695 | 0        | 0        | 0.001427 | 0.000528 | 0.002026 |
| 0.008933 | 0.002536 | 0.006139 | 0.000251 | 0.003762 | 0.000181 | 0.000188 | 0.001339 | 0.00474  | 0.002491 | 0        | 0        | 0.00342  | 0.004452 | 0.008938 |
| 0.001229 | 0.002069 | 0.001167 | 0.001216 | 0.002035 | 7.51E-05 | 0.000228 | 0.001514 | 0.001029 | 0.000793 | 0.000967 | 0.000114 | 0.002737 | 0.002395 | 0.00115  |
| 0.001595 | 0.00042  | 0.000402 | 0.000177 | 0.002021 | 0.000108 | 5.90E-05 | 0.001179 | 0.001599 | 0.000655 | 0.000701 | 0.000111 | 0.004572 | 0.002916 | 0.00141  |
| 0.002628 | 0.003318 | 0.001196 | 0.001198 | 0.000203 | 0.000234 | 0        | 0.001072 | 0.000228 | 0.001934 | 0        | 0.000376 | 0.002999 | 0.001893 | 0.001216 |
| 0.003173 | 0.000947 | 0.001551 | 0.00053  | 0        | 0.000167 | 7.59E-05 | 0.000605 | 8.64E-05 | 0.00031  | 0.001793 | 0.000262 | 0.001212 | 0.000409 | 0.000513 |
| 0.00164  | 0.000775 | 0.000315 | 0.000256 | 0.002556 | 0.011799 | 0.005024 | 0.004109 | 0.003575 | 0.002407 | 0.006502 | 0.007322 | 0.005423 | 0.003612 | 0.001698 |
| 0.000331 | 0.00037  | 0.000185 | 0.000316 | 0.00111  | 0.000676 | 0.000126 | 0.000249 | 0.000516 | 0.000821 | 0.000959 | 0.001327 | 0.002251 | 0.001187 | 0.000669 |
| 0.004067 | 0.005466 | 0.000149 | 0        | 0.018235 | 0.000256 | 0.001026 | 0.013738 | 0.020302 | 0.015764 | 0        | 0.000363 | 0.000164 | 0.057261 | 0.034601 |
| 0        | 0.000308 | 0        | 0        | 0        | 0.001653 | 0.003654 | 0.000448 | 0.004609 | 0        | 0.000649 | 0.000963 | 0.002078 | 0.000428 | 0.000625 |
| 0.00038  | 0.003738 | 0.000678 | 5.65E-05 | 0.007662 | 0.002151 | 0.002906 | 0.001403 | 0.005012 | 0.002018 | 0.000849 | 0.000619 | 0.005802 | 0.001741 | 0.001132 |

| HC036    | HC038    | HC058    | HC059    | HC060    | HC061    | HC062    | HC063    | HC064    | HC065    | HC066    | HC067    | HC068    | HC069    | HC070    |
|----------|----------|----------|----------|----------|----------|----------|----------|----------|----------|----------|----------|----------|----------|----------|
| 0        | 0        | 0        | 0        | 0        | 0        | 0        | 0        | 0        | 0        | 0        | 0.000142 | 0        | 0        | 0        |
| 0        | 0        | 0        | 0        | 0        | 0        | 0        | 0        | 0        | 0        | 0        | 0.000384 | 0        | 0        | 0        |
| 0.001034 | 0        | 1.76E-05 | 4.63E-05 | 0.000161 | 0        | 0        | 0        | 0.000163 | 0.000746 | 0.000202 | 0.031332 | 0        | 0.001482 | 0        |
| 0.000861 | 4.75E-05 | 0        | 0        | 0.001288 | 0.000836 | 0        | 0        | 0.000622 | 0.000515 | 0.000897 | 0.013376 | 0        | 0.001537 | 0        |
| 0.001139 | 0        | 0        | 0        | 0.000423 | 0        | 0        | 0.000142 | 0.000337 | 8.04E-05 | 8.03E-05 | 0.03505  | 0        | 0.002244 | 0        |
| 0        | 0.000443 | 6.08E-05 | 0        | 0.001099 | 0.001188 | 0        | 0        | 0        | 0.000424 | 0.000703 | 0.006491 | 0.000822 | 0.00286  | 0.000108 |
| 0.002402 | 0.000366 | 0        | 0        | 0.000777 | 0.004143 | 0        | 0.000245 | 0        | 8.04E-05 | 0.000222 | 0.001    | 0        | 0.001354 | 0        |
| 0.019075 | 0.004089 | 0        | 3.26E-05 | 0.018818 | 0.018534 | 0.000753 | 0.008796 | 0.019907 | 0.001696 | 0.004558 | 0.01459  | 0.000553 | 0.009713 | 0.0006   |
| 0.024536 | 0.03525  | 0.001397 | 0.008289 | 0.046272 | 0.047645 | 0.001217 | 0.036045 | 0.002139 | 0.042617 | 0.048496 | 0.03458  | 0.01195  | 0.046182 | 0.008515 |
| 0.04173  | 0.00377  | 0.00985  | 0.00967  | 0.016772 | 0.031769 | 0.001644 | 0.040847 | 0.00669  | 0.048181 | 0.034903 | 0.018862 | 0.036885 | 0.006482 | 0.015285 |
| 0.008566 | 0.000274 | 0.000182 | 0.000199 | 0.015985 | 0.003361 | 0.000468 | 0.001341 | 0.000203 | 0.002588 | 0.002808 | 0.002176 | 0.000549 | 0.001573 | 0.00064  |
| 0        | 0.000192 | 1.92E-05 | 0.000233 | 0        | 0.001423 | 0        | 0.000137 | 0        | 0        | 0.001313 | 0.000602 | 0.000459 | 0.000183 | 0.000536 |
| 0.000488 | 0.00194  | 0.000411 | 0.000832 | 0.003978 | 0.002283 | 0.000378 | 0.000968 | 0        | 0.002208 | 0.008191 | 0.002333 | 0.001865 | 0.001915 | 0.002138 |
| 0.004757 | 0.001603 | 0.000218 | 0.000981 | 0.00098  | 0.001579 | 5.46E-05 | 0.000376 | 0.000238 | 0.002544 | 0.001772 | 0.001963 | 0.001192 | 0.007085 | 0.000278 |
| 0.011576 | 0.017994 | 0.007137 | 0.009473 | 0.022676 | 0.01998  | 0.005293 | 0.010686 | 0.001221 | 0.009399 | 0.044769 | 0.015111 | 0.00844  | 0.014682 | 0.012349 |
| 0.010969 | 0        | 2.88E-05 | 0.000156 | 0        | 0        | 0        | 0.000128 | 0        | 0.079249 | 0.021609 | 0.022755 | 0.014963 | 0.014384 | 0.035856 |
| 0        | 4.75E-05 | 0        | 3.77E-05 | 0.000179 | 0        | 8.05E-05 | 0        | 0        | 0.000245 | 0        | 0.000394 | 0.000103 | 0.000305 | 0        |
| 0.000349 | 0.017014 | 0.006595 | 0.043571 | 0.055093 | 0.029369 | 0.008546 | 0.008084 | 0.07027  | 0.053401 | 0.0402   | 0.001062 | 0.007735 | 0.006469 | 0.078272 |
| 0.002603 | 0        | 0.000254 | 0        | 0.01444  | 0        | 5.46E-05 | 0.000384 | 0.002069 | 0.000614 | 0.000421 | 0.000261 | 0        | 0        | 0        |
| 0.039132 | 0        | 0.001232 | 0.000129 | 0.125637 | 0.002376 | 0.00037  | 0.004882 | 0.005196 | 0.00303  | 0.002146 | 0.0011   | 0        | 0.002512 | 4.63E-05 |
| 0.000507 | 0.020241 | 0.012852 | 0.004568 | 0.00281  | 0.011046 | 0.00647  | 0.027616 | 0.004876 | 0.004284 | 0.00553  | 0.005448 | 0.00305  | 0.001177 | 0.017709 |
| 0        | 3.17E-05 | 0.000475 | 2.74E-05 | 0.000124 | 0        | 0.000103 | 0.000151 | 0.000209 | 0.000954 | 0        | 0.000365 | 0        | 0        | 0        |
| 0        | 0.00071  | 0.784018 | 0.676057 | 0.000731 | 0.001102 | 0.001633 | 0.001255 | 0.000192 | 0        | 0        | 0        | 0        | 0        | 0        |
| 0.12955  | 0.007772 | 0.028578 | 0.023443 | 0.009988 | 0.095071 | 0.015784 | 0.11139  | 0.340872 | 0.058376 | 0.028618 | 0.014068 | 0.002018 | 0.004732 | 0.016444 |
| 0.004412 | 0.003838 | 0.001848 | 0.000103 | 0.001623 | 0.059246 | 0.007396 | 0.056744 | 0.020976 | 0.010232 | 0.002431 | 0.003068 | 0.00013  | 0.002024 | 0.002225 |
| 0.005556 | 0.007286 | 0.000663 | 0.00022  | 0.003403 | 0.010123 | 0.001383 | 0.026717 | 0.005219 | 0.002742 | 0.000321 | 0.003291 | 0.000659 | 0.005786 | 0.000688 |
| 0.001546 | 0.002388 | 0.000104 | 3.26E-05 | 0.000819 | 0.003432 | 0.000144 | 0.00355  | 0.001738 | 0.000607 | 0.000349 | 0.000597 | 0.0002   | 0.000427 | 0.000141 |
| 0.013452 | 0.022675 | 0.006798 | 0.003105 | 0.004387 | 0.015196 | 0.007239 | 0.020082 | 0.006109 | 0.011625 | 0.007881 | 0.006866 | 0.001488 | 0.021749 | 0.008488 |
| 0.01729  | 0.008179 | 0.008294 | 0.011822 | 0.007997 | 0.0747   | 0.006987 | 0.064899 | 0.032537 | 0.027081 | 0.009052 | 0.02128  | 0.002317 | 0.031481 | 0.004524 |
| 0.163198 | 0.106931 | 0.017717 | 0.047992 | 0.081968 | 0.205425 | 0.02304  | 0.208295 | 0.090288 | 0.118938 | 0.070621 | 0.121972 | 0.025158 | 0.213707 | 0.057968 |
| 0.027077 | 0.006449 | 0.019256 | 0.000683 | 0.00137  | 0.029478 | 0.010683 | 0.02705  | 0.027957 | 0.010459 | 0.004159 | 0.079052 | 0.000822 | 0.005134 | 0.010927 |
| 0.007399 | 0.002051 | 0.001024 | 0.003467 | 0.002851 | 0.005714 | 0.001427 | 0.008408 | 0.007556 | 0.004251 | 0.001365 | 0.09459  | 0.000366 | 0.009536 | 0.001897 |
| 0.000818 | 0.00294  | 0        | 5.32E-05 | 0.001251 | 0.007809 | 0        | 0.001725 | 0.003964 | 0.000267 | 0.000471 | 0.000811 | 0        | 0.000439 | 0.000376 |
| 0.008896 | 0.001465 | 1.44E-05 | 0.000695 | 0.017701 | 0.012851 | 0.000131 | 0.003643 | 0.015205 | 0.002307 | 0.003378 | 0.004604 | 0.000576 | 0.005506 | 0.00017  |
| 0.000608 | 0.000271 | 8.32E-05 | 0.000278 | 0.000685 | 0.006551 | 0        | 0.003735 | 0.008195 | 0.003246 | 0.000446 | 0.000138 | 0        | 0.000787 | 0        |
| 0.174722 | 0.008281 | 0.004146 | 0.011305 | 0.01702  | 0.070018 | 0.000427 | 0.028906 | 0.090212 | 0.062207 | 0.010104 | 0.020536 | 0.000253 | 0.197829 | 0.001169 |
| 0.264064 | 0.0077   | 0.007318 | 0.016567 | 0.014661 | 0.073246 | 0.000534 | 0.026128 | 0.100488 | 0.076778 | 0.013864 | 0.026387 | 0        | 0.291296 | 0.00144  |
| 0.00202  | 0.000421 | 0.0002   | 7.21E-05 | 0.000437 | 0.002048 | 0.0001   | 0.005408 | 0.000936 | 0.002987 | 0.000767 | 0.000308 | 0.000216 | 0.000415 | 0.000266 |
| 0.001067 | 0.000929 | 0.000216 | 0.000122 | 0.001026 | 0.002025 | 3.79E-05 | 0.005178 | 0.000407 | 0.001451 | 0.000382 | 0.000379 | 0.000646 | 0.000299 | 0.000283 |
| 0.000148 | 0.000439 | 0.001619 | 0.000712 | 0.003707 | 0.001782 | 0        | 0.000157 | 0        | 0.000344 | 0.010295 | 0.043698 | 0.030216 | 0        | 0.000584 |
| 0        | 0.000224 | 0        | 0        | 0.000244 | 0        | 3.34E-05 | 0        | 0        | 0        | 0.001072 | 0.001451 | 0.001452 | 0        | 0        |
| 0        | 0.000703 | 0        | 0        | 0.001228 | 0.00075  | 7.44E-05 | 0        | 0        | 0        | 0.001902 | 0.003016 | 0.00601  | 0        | 0.000166 |
| 0.000206 | 0.27758  | 0.021178 | 0.066872 | 0.163301 | 0.065976 | 0.06579  | 0.080114 | 0.004661 | 0.049829 | 0.344234 | 0.222058 | 0.550549 | 0.021792 | 0.111712 |
| 0        | 0        | 0        | 0        | 0        | 0        | 0        | 0        | 0        | 6.95E-05 | 9.41E-05 | 0        | 0.00013  | 0        | 0.000106 |
| 0        | 0.001628 | 0.000451 | 0.001103 | 0.00012  | 0.000844 | 7.13E-05 | 0.000834 | 0.000541 | 0.001009 | 0.000186 | 0.001162 | 0.004278 | 0.000604 | 0.004042 |
| 0        | 8.37E-05 | 3.20E-05 | 0        | 0.000152 | 0        | 0        | 0        | 0        | 0.000157 | 0        | 0.00027  | 0.001978 | 0        | 0.00032  |
| 0        | 0.000375 | 7.36E-05 | 0.000172 | 0.0016   | 0        | 9.26E-05 | 0.000139 | 0        | 0.000252 | 0.000501 | 0.000275 | 0.019817 | 0        | 0.001124 |
| 0        | 0        | 0        | 0        | 0.000175 | 0        | 0        | 0        | 0        | 0        | 0        | 0        | 0        | 0        | 0        |
| 0        | 9.72E-05 | 0.00017  | 0        | 0        | 0        | 0        | 0.000102 | 0        | 8.77E-05 | 0.000174 | 0.001764 | 0.000336 | 0.000396 | 0        |
| 0        | 0        | 0        | 0.000321 | 0        | 0        | 0        | 0        | 0        | 9.50E-05 | 0        | 0.000261 | 0.000103 | 0        | 0.00017  |
| 0        | 0        | 0        | 0        | 0.000258 | 0        | 0        | 0        | 0.000174 | 0.000106 | 0        | 0        | 0        | 0        | 0        |
| 0        | 0.000708 | 0        | 0.000473 | 0.000759 | 0        | 0.005185 | 0.000902 | 0.000366 | 0.001418 | 7.75E-05 | 0.000256 | 0.003343 | 0        | 0.000255 |
| 0        | 0        | 0        | 3.60E-05 | 0        | 0        | 0        | 0        | 0        | 0        | 0        | 0        | 0        | 0        | 0        |
| 0        | 0        | 0        | 0.000125 | 0.00602  | 0        | 0.000153 | 0.00107  | 0        | 0.000256 | 0.001897 | 0.000138 | 0.004119 | 0        | 0.00064  |
| 0        | 0        | 0        | 0        | 0        | 0        | 0        | 0        | 0        | 0        | 0.000166 | 0.000133 | 0.001072 | 0        | 4.24E-05 |
| 0.001038 | 4.97E-05 | 0        | 0.000112 | 0.000152 | 0.000782 | 0        | 0        | 0        | 0.001042 | 0.000922 | 0.000389 | 0.000353 | 0.007786 | 8.29E-05 |

|          |          |          |          |          |          |          |          |          |          |          |          |          |          |          |
|----------|----------|----------|----------|----------|----------|----------|----------|----------|----------|----------|----------|----------|----------|----------|
| 0.000144 | 0        | 0        | 0.00012  | 0.005813 | 0        | 0        | 0        | 0        | 0.000402 | 0        | 0.000926 | 0.000512 | 4.05E-05 |          |
| 0        | 0.000102 | 4.32E-05 | 9.26E-05 | 0.000487 | 0        | 0        | 0.000165 | 0.000192 | 0.000621 | 0.00618  | 0.002357 | 0.002131 | 0.002146 | 0.001546 |
| 0.001493 | 0.001113 | 7.68E-05 | 0.000343 | 0.000248 | 0        | 0        | 0.00012  | 0.000227 | 0.004873 | 0.038495 | 0.014035 | 0.000756 | 0.010817 | 0.000658 |
| 0        | 0.001029 | 0.000238 | 8.23E-05 | 0.001996 | 0        | 0.002224 | 0.004489 | 0.001011 | 0.000494 | 0.000889 | 0.00036  | 8.66E-05 | 0        | 0.00049  |
| 0        | 4.52E-05 | 0.000134 | 0        | 0.000285 | 0        | 0.003677 | 0.00345  | 0.000854 | 0.001119 | 0.000108 | 0        | 0        | 0        | 0.000428 |
| 0        | 0.000522 | 0.000123 | 3.43E-05 | 0.001232 | 0        | 0.002901 | 0.001924 | 0.000814 | 0.000314 | 0.000274 | 0.000669 | 8.99E-05 | 0        | 0.000447 |
| 0        | 0.002576 | 0        | 0        | 0.002102 | 0        | 0.01325  | 0.000404 | 0        | 0.001444 | 0.000388 | 0.000156 | 0.000466 | 0        | 0.001986 |
| 0        | 0.004009 | 1.76E-05 | 4.80E-05 | 0.004682 | 0        | 0.016808 | 0.001893 | 0.000668 | 0.001184 | 0.000534 | 0.000142 | 0.000649 | 0        | 0.001838 |
| 0        | 9.05E-05 | 0.000618 | 3.77E-05 | 0.00057  | 0        | 0.004624 | 0.000137 | 0        | 0.000515 | 0.000784 | 0.000251 | 0.001039 | 0        | 0.00177  |
| 0        | 0.023941 | 0.036664 | 0.00896  | 0.169059 | 0.000946 | 0.361966 | 0.08713  | 0.025126 | 0.102254 | 0.103741 | 0.042888 | 0.06475  | 0.001518 | 0.185929 |
| 0.000167 | 0.002105 | 0.00357  | 0.001426 | 0.010264 | 0        | 0.046427 | 0.008608 | 0.000982 | 0.007022 | 0.009453 | 0.004523 | 0.011723 | 0.000134 | 0.024614 |
| 0        | 0.000129 | 0        | 0        | 0        | 0        | 4.86E-05 | 0.00012  | 0        | 0        | 0.000413 | 0.000379 | 0.001169 | 0.000116 | 5.40E-05 |
| 0        | 0.004331 | 0        | 8.41E-05 | 0.000556 | 0.000336 | 0.001146 | 0        | 0.000221 | 0.000249 | 0.000667 | 0.000152 | 0.001079 | 0        | 0.000181 |
| 0.00078  | 0.065473 | 0.001597 | 0.008404 | 0.026254 | 0.006301 | 0.04806  | 0.004978 | 0.008846 | 0.035189 | 0.015324 | 0.007022 | 0.031591 | 0.003378 | 0.077676 |
| 0.003608 | 0.25734  | 0.004521 | 0.034023 | 0.063173 | 0.033903 | 0.295042 | 0.021141 | 0.021186 | 0.11227  | 0.054558 | 0.025752 | 0.098581 | 0.029139 | 0.271012 |
| 0        | 0.000728 | 0        | 8.92E-05 | 0        | 0.000797 | 0.002503 | 0.000603 | 0.000599 | 0.000574 | 0.000291 | 0        | 0.000499 | 0        | 0.000563 |
| 0        | 0.002411 | 0        | 0.000103 | 0.0047   | 0.002666 | 0.001557 | 0.000268 | 0.000982 | 0.000274 | 0.000443 | 0.00027  | 0.000469 | 0        | 0.00033  |
| 0.000158 | 0.003198 | 0        | 4.80E-05 | 0.000957 | 0.002173 | 6.68E-05 | 0.000273 | 0.001912 | 0.00015  | 0.000288 | 0.000242 | 0.000386 | 0        | 0.000137 |
| 0        | 0.000579 | 0        | 4.46E-05 | 0        | 0        | 0        | 0        | 0        | 0        | 0.000224 | 0        | 0.000463 | 0        | 0        |
| 0        | 0.010248 | 4.64E-05 | 3.60E-05 | 0.00241  | 0.001563 | 0.003907 | 0.017346 | 0.034042 | 0.011347 | 0.004082 | 0.000266 | 0.006046 | 0.004866 | 0.002212 |
| 0        | 0.002614 | 0        | 0        | 0.001435 | 0.000618 | 0.003503 | 0.000669 | 0.001517 | 0.000431 | 0.003924 | 0.000128 | 0.001348 | 0.000323 | 0.002111 |
| 0        | 0.023742 | 2.56E-05 | 0        | 0.002322 | 0.000281 | 0.010941 | 0.001196 | 0.003104 | 0.007702 | 0.004707 | 0        | 0.013295 | 0.001049 | 0.007906 |
| 0        | 0.001203 | 3.84E-05 | 8.06E-05 | 0.00361  | 0.008161 | 0        | 0.000256 | 0.013264 | 0.000537 | 0.001332 | 0        | 0.000443 | 0.000274 | 0.000663 |
| 0        | 0.000493 | 0        | 0        | 0.002313 | 0        | 4.10E-05 | 0.000811 | 0.002621 | 0.000362 | 0.0008   | 0.000152 | 0.000246 | 0        | 0.000241 |
| 0        | 0.00185  | 1.60E-05 | 0.000134 | 0.006779 | 0.000618 | 6.68E-05 | 0.002849 | 0.00719  | 0.000271 | 0.0019   | 0.00256  | 0.001252 | 0        | 0.000659 |
| 0.000321 | 0.003767 | 0.000232 | 0.000113 | 0.004488 | 0.00258  | 0.000322 | 0.00195  | 0.001174 | 0.000296 | 0.001841 | 0.001683 | 0.001548 | 0.000744 | 0.001221 |
| 0        | 0.0037   | 0        | 6.18E-05 | 0.001743 | 0.007755 | 5.31E-05 | 0.000777 | 0.000366 | 0.000318 | 0.003179 | 0.002039 | 0.002903 | 0.000287 | 0.000164 |
| 0        | 0.001253 | 0.000142 | 3.26E-05 | 0.00023  | 0.004362 | 0.001264 | 0.003427 | 0        | 0.000271 | 0.000501 | 0.000242 | 0.000353 | 0        | 0.000415 |
| 0        | 0.000473 | 2.24E-05 | 0        | 0        | 0.006113 | 0.000121 | 0.002795 | 0        | 0.000907 | 0.000233 | 0        | 0        | 0.000213 | 0        |
| 0        | 0.004073 | 0.000899 | 0.001146 | 0.001568 | 0        | 0.000618 | 0.001139 | 0.000366 | 0.005619 | 0.005233 | 0.004438 | 0.001705 | 0.000469 | 0.000713 |
| 0.000536 | 0.001357 | 0.000534 | 0.000132 | 0.001522 | 0.000516 | 0.000103 | 0.00025  | 0        | 0.000241 | 0.001157 | 0.001622 | 0.000719 | 0        | 0.00022  |
| 0        | 0        | 0.001232 | 4.29E-05 | 0.00057  | 0        | 0.001524 | 0.001876 | 0        | 0.000548 | 0.00033  | 0.000228 | 0.002191 | 0        | 0.000341 |
| 0        | 0        | 0.001599 | 0        | 0.003665 | 0.00061  | 4.71E-05 | 0.000404 | 0        | 0.000687 | 0.000598 | 0.000327 | 0        | 0.000152 | 0        |
| 0        | 2.94E-05 | 0.003074 | 9.26E-05 | 0.001821 | 0        | 0.003408 | 0.001295 | 0        | 0.000841 | 0.002179 | 0.004922 | 0.003926 | 0        | 0.014848 |

| HC071    | HC072    | HC057    | HC037    | HC056    | HC054    | HC039    | HC040    | HC041    | HC042    | HC043    | HC044    | HC045    | HC046    | HC047    |   |
|----------|----------|----------|----------|----------|----------|----------|----------|----------|----------|----------|----------|----------|----------|----------|---|
|          | 0        | 0        | 0        | 0.000131 | 0        | 0        | 0        | 0        | 0        | 0        | 0.00177  | 0        | 0        | 0.000677 | 0 |
|          | 0        | 0        | 0        | 0        | 0        | 0        | 0.00027  | 0        | 0        | 0        | 0.000234 | 0        | 0        | 0        | 0 |
|          | 0        | 0        | 0        | 0.001266 | 0.000152 | 0        | 0.019094 | 0        | 0        | 7.12E-05 | 0.006707 | 0        | 4.57E-05 | 0.003244 | 0 |
|          | 0        | 0        | 0        | 0        | 0.000141 | 0        | 0.012057 | 0        | 0        | 0.000202 | 0.005883 | 0.000631 | 0.000108 | 0.003902 | 0 |
|          | 0        | 0        | 0        | 0.000153 | 0.00012  | 0        | 0.021613 | 0        | 0        | 6.33E-05 | 0.009503 | 0        | 0        | 0.008961 | 0 |
| 7.40E-05 | 0.000217 | 0        | 0        | 0.000152 | 0.000167 | 0.008794 | 0        | 0        | 0.000261 | 0.000541 | 0.000256 | 0        | 0.002736 | 7.93E-05 | 0 |
| 0        | 4.19E-05 | 0        | 0        | 0        | 0        | 0.002761 | 0        | 0        | 0.000142 | 0.001156 | 0        | 0        | 0        | 0.001664 | 0 |
| 0.000831 | 0.000746 | 0.000136 | 0.000908 | 0.001746 | 0.000192 | 0.009686 | 2.90E-05 | 0.000668 | 0.003883 | 0.012663 | 0.000956 | 0.000183 | 0.022276 | 0.00256  | 0 |
| 0.020798 | 0.055473 | 0.008943 | 0.009161 | 0.11269  | 0.002257 | 0.071467 | 0.024731 | 0.003306 | 0.000237 | 0.043339 | 0.033888 | 0.047611 | 0.061046 | 0.012077 | 0 |
| 0.025846 | 0.018949 | 0.001388 | 0.018827 | 0.038114 | 0.003799 | 0.018527 | 0.004463 | 0.005271 | 0.001732 | 0.035274 | 0.018827 | 0.010142 | 0.028577 | 0.012486 | 0 |
| 0.002476 | 0.003928 | 0.001863 | 0.000505 | 0.008222 | 0.000394 | 0.034367 | 0.002518 | 6.13E-05 | 7.91E-05 | 0.001139 | 0.012286 | 0.003156 | 0.002595 | 0.001334 | 0 |
| 0.000544 | 0.004423 | 0.000465 | 0.000414 | 0.002164 | 0.000123 | 0.006637 | 2.21E-05 | 6.33E-05 | 8.70E-05 | 0.00076  | 0.000215 | 0.000192 | 0.000329 | 0.000201 | 0 |
| 0.000979 | 0.004334 | 0.000194 | 0.001992 | 0.000653 | 0.001594 | 0.012224 | 0.000321 | 0.000184 | 8.70E-05 | 0        | 0.00272  | 0.000605 | 0.001025 | 0.001544 | 0 |
| 0.000562 | 0.004913 | 0.000617 | 0.001504 | 0.002106 | 0.000296 | 0.012773 | 0.000167 | 0.000536 | 0.005978 | 0.003241 | 0.007788 | 0.000784 | 0.002971 | 0.000585 | 0 |
| 0.005098 | 0.053006 | 0.004765 | 0.031507 | 0.023505 | 0.01023  | 0.063612 | 0.003495 | 0.009202 | 0.00996  | 0.005996 | 0.035603 | 0.011038 | 0.010814 | 0.018873 | 0 |
| 0.004748 | 0.038194 | 0        | 0.18401  | 0        | 0.003696 | 0.000335 | 0        | 0        | 0        | 0        | 0        | 0        | 0        | 0        | 0 |
| 9.47E-05 | 0        | 0        | 0        | 0.001228 | 0        | 0        | 0        | 0        | 6.72E-05 | 0        | 0        | 0.000234 | 0.00032  | 0        | 0 |
| 0.050774 | 0.059048 | 0.016258 | 0.052508 | 0.110798 | 0.040113 | 0.009696 | 0.102909 | 0.041137 | 0.048365 | 0.049448 | 0.02137  | 0.017539 | 0.017311 | 0.009646 | 0 |
| 8.28E-05 | 0.000168 | 0.00013  | 0        | 0.000497 | 0.000849 | 0.002621 | 0.000169 | 0        | 0        | 0.004582 | 0.002525 | 5.52E-05 | 0.000433 | 0        | 0 |
| 0.000754 | 0.002349 | 0.002608 | 0        | 0.004464 | 0.011425 | 0.029264 | 0.004839 | 6.33E-05 | 0        | 0.003628 | 0.014056 | 0.001009 | 0.013447 | 0.000137 | 0 |
| 0.01884  | 0.034345 | 0.002051 | 0.022891 | 0.004338 | 0.003436 | 0.000957 | 0.001806 | 0.001926 | 0.001166 | 0.004525 | 0.009883 | 0.004462 | 0.003978 | 0.044107 | 0 |
| 0        | 0.000173 | 0        | 0        | 0.000413 | 0        | 0        | 0.000138 | 0        | 0.000202 | 0.000283 | 0.000782 | 0.000128 | 0.00031  | 0.000478 | 0 |
| 0        | 0.006178 | 0        | 0        | 0.000162 | 0        | 0.000976 | 0        | 0        | 0.001162 | 0.0112   | 0.197735 | 0.000841 | 0.000668 | 0.002258 | 0 |
| 0.006935 | 0.009328 | 0.000875 | 0.037297 | 0.011692 | 0.001587 | 0.003876 | 0.000426 | 0.006197 | 0.176014 | 0.069627 | 0.070575 | 0.011339 | 0.095199 | 0.019535 | 0 |
| 0.004018 | 0.00115  | 9.42E-05 | 0.015058 | 0.003821 | 0.000793 | 0.000716 | 7.19E-05 | 0.002426 | 0.047242 | 0.020809 | 0.006593 | 0.000897 | 0.021486 | 0.004515 | 0 |
| 0.000935 | 0.000762 | 4.43E-05 | 0.000744 | 0.001563 | 6.88E-05 | 0.005336 | 0.000156 | 0.000676 | 0.004662 | 0.007952 | 0.001244 | 0.000396 | 0.025417 | 0.002498 | 0 |
| 0        | 0.000288 | 3.14E-05 | 0        | 0.000423 | 0        | 0.002993 | 2.90E-05 | 0.000134 | 0.001621 | 0.000986 | 0.000331 | 8.38E-05 | 0.003141 | 0.001826 | 0 |
| 0.001571 | 0.006264 | 0.000324 | 0.006045 | 0.001171 | 0.000732 | 0.010346 | 0.000242 | 0.001155 | 0.027346 | 0.013342 | 0.013681 | 0.001483 | 0.020565 | 0.004647 | 0 |
| 0.003518 | 0.005075 | 0.000238 | 0.025173 | 0.005817 | 0.001567 | 0.010309 | 0.000504 | 0.001704 | 0.078842 | 0.039032 | 0.015846 | 0.00501  | 0.06887  | 0.006142 | 0 |
| 0.014556 | 0.038391 | 0.002525 | 0.089783 | 0.02017  | 0.00621  | 0.09004  | 0.001762 | 0.006072 | 0.361969 | 0.134915 | 0.121782 | 0.013629 | 0.154373 | 0.036305 | 0 |
| 0.002257 | 0.003653 | 0        | 0.019673 | 0.003983 | 6.47E-05 | 0.047707 | 0.00041  | 0.002234 | 0.105788 | 0.029431 | 0.005417 | 0.002111 | 0.023706 | 0.002854 | 0 |
| 0.00024  | 0.001566 | 0.000107 | 0.001067 | 0.000695 | 0.000355 | 0.033335 | 8.98E-05 | 0.00048  | 0.019335 | 0.016776 | 0.007166 | 0.001397 | 0.020565 | 0.000545 | 0 |
| 0.000648 | 0.000285 | 3.28E-05 | 0        | 0.007197 | 0        | 0.001627 | 0.000142 | 0.001406 | 9.09E-05 | 0.008663 | 0.00032  | 0.000169 | 0.013005 | 0.000136 | 0 |
| 0.00018  | 0.000346 | 3.43E-05 | 0.001629 | 0.007135 | 0.000131 | 0.004629 | 3.18E-05 | 0.001795 | 0.00414  | 0.012736 | 0.000947 | 0.000664 | 0.018214 | 0.000971 | 0 |
| 0        | 5.24E-05 | 0        | 0.001998 | 0.001181 | 0        | 0.00027  | 0        | 0.001056 | 0.001004 | 0.001293 | 0.000291 | 7.04E-05 | 0.001552 | 7.40E-05 | 0 |
| 0        | 0.002763 | 0.000164 | 0.0516   | 0.046984 | 4.38E-05 | 0.029254 | 0.000264 | 0.016258 | 0.014986 | 0.049392 | 0.005855 | 0.00135  | 0.067252 | 0.000386 | 0 |
| 0.00018  | 0.004913 | 0.000186 | 0.074826 | 0.050779 | 0.000123 | 0.022608 | 0.000155 | 0.018228 | 0.026638 | 0.048584 | 0.01267  | 0.001426 | 0.098396 | 0.000483 | 0 |
| 0.000414 | 0.00012  | 7.99E-05 | 0.00021  | 0.003857 | 7.09E-05 | 0.001422 | 0.000171 | 0.000212 | 8.70E-05 | 0.001899 | 0.000218 | 0.000268 | 0.001401 | 0.001008 | 0 |
| 0.001177 | 0.000359 | 0        | 0.000193 | 0.00519  | 7.30E-05 | 0.000614 | 0.000282 | 0.000832 | 0.00019  | 0.00417  | 0.000404 | 0.000421 | 0.006375 | 0.000562 | 0 |
| 0.000299 | 0.002574 | 0        | 0.003105 | 0.000303 | 0.013359 | 0.002296 | 0.000402 | 0.000419 | 0.000684 | 0.000509 | 0.000177 | 0.000586 | 0.001316 | 0.001045 | 0 |
| 0        | 0.000118 | 3.43E-05 | 0.00046  | 0        | 0.001879 | 0.000539 | 5.11E-05 | 0        | 0        | 0        | 0        | 7.23E-05 | 0        | 0        | 0 |
| 0.000201 | 0        | 3.85E-05 | 0.000233 | 0.000528 | 0.005618 | 0.000502 | 0.000258 | 0.00017  | 0        | 0        | 0        | 0.000103 | 0        | 0.000273 | 0 |
| 0.146249 | 0.059689 | 0.359944 | 0.161992 | 0.169699 | 0.552858 | 0.268875 | 0.326818 | 0.041707 | 0.013594 | 0.06936  | 0.303898 | 0.11799  | 0.083351 | 0.107163 | 0 |
| 0.000314 | 0.00122  | 0        | 0        | 0        | 4.38E-05 | 0.001041 | 0        | 0        | 0        | 0        | 0        | 9.14E-05 | 0        | 0        | 0 |
| 0.001092 | 0.000498 | 2.57E-05 | 0.001555 | 0.000235 | 0.001508 | 0.000521 | 0.000216 | 0        | 0.000716 | 0.000517 | 0.005018 | 0.000386 | 0.000263 | 0.000485 | 0 |
| 8.88E-05 | 0.000196 | 0        | 0.000182 | 0        | 0.00077  | 0.000651 | 4.28E-05 | 0        | 9.09E-05 | 0        | 0        | 0.000112 | 0        | 0        | 0 |
| 0.001068 | 0.001092 | 0        | 0.000238 | 0.000162 | 0.006759 | 0.001274 | 0.000182 | 0.000184 | 0.000233 | 0.001067 | 0        | 0.001568 | 0.00126  | 0.000289 | 0 |
| 7.99E-05 | 0.000144 | 0        | 0        | 0        | 0        | 0.000316 | 0        | 0        | 0        | 0        | 0        | 0        | 0        | 0        | 0 |
| 0        | 0.000225 | 3.57E-05 | 0        | 0.000261 | 3.96E-05 | 0.001171 | 2.76E-05 | 0        | 0.015871 | 0.000242 | 0.000203 | 0        | 0.00032  | 0        | 0 |
| 0        | 0.000414 | 0        | 0.000187 | 0.000146 | 0        | 0.000344 | 0        | 0        | 0        | 0        | 0        | 0        | 0.001081 | 0        | 0 |
| 0.000163 | 0.000191 | 0        | 0        | 0.000371 | 0        | 0        | 0        | 0        | 0        | 0        | 0        | 0        | 0        | 0        | 0 |
| 0.000178 | 0.000555 | 0.000133 | 0.000148 | 0.000831 | 0.000117 | 0        | 0.000235 | 0.00033  | 0.000803 | 0.008291 | 6.97E-05 | 9.71E-05 | 0.000489 | 0.00022  | 0 |
| 0        | 0        | 0        | 0        | 0        | 0        | 0        | 0        | 0        | 8.70E-05 | 0        | 0        | 0        | 0        | 0        | 0 |
| 0.00287  | 0.030089 | 0        | 0.00063  | 0.00045  | 0.001829 | 0.008496 | 0.00014  | 0.000196 | 0.000138 | 0        | 0        | 0.00019  | 0.000282 | 0.000203 | 0 |
| 7.99E-05 | 0.00038  | 0        | 0        | 0        | 0.000962 | 0.004667 | 0        | 0        | 0.000103 | 0        | 0        | 0        | 0        | 0        | 0 |
| 0.000666 | 0.000574 | 3.43E-05 | 0.002736 | 7.84E-05 | 0.000171 | 0.036598 | 8.57E-05 | 0.000233 | 0.001249 | 0.016308 | 0.000267 | 0.000137 | 0.001157 | 0        | 0 |

|          |          |          |          |          |          |          |          |          |          |          |          |          |          |          |
|----------|----------|----------|----------|----------|----------|----------|----------|----------|----------|----------|----------|----------|----------|----------|
| 0.000737 | 0.001372 | 6.85E-05 | 0.001192 | 0        | 0.000668 | 0.015069 | 0        | 0        | 5.54E-05 | 0.000251 | 0.000108 | 0        | 0.000677 | 0        |
| 0.004319 | 0.001975 | 4.00E-05 | 0        | 0        | 0.000482 | 0.001701 | 0.000228 | 0.000243 | 0.001115 | 0.012089 | 0.000692 | 0.000413 | 0        | 0        |
| 0.001216 | 0.00071  | 0        | 0.000255 | 0.000146 | 0.000488 | 0.005782 | 9.26E-05 | 0.000174 | 0.007208 | 0.079163 | 0.002903 | 0.000303 | 0        | 0        |
| 0.001213 | 0.0006   | 0.000294 | 0.00046  | 0.000784 | 4.38E-05 | 0        | 0.000111 | 0.000957 | 0.000162 | 0        | 0        | 0.000725 | 0.000395 | 0.003601 |
| 0.003515 | 0.000773 | 0.000964 | 0.000948 | 0.002185 | 0.000761 | 0        | 0.001089 | 0.005242 | 7.51E-05 | 0        | 0.000334 | 0.002454 | 0        | 0.005611 |
| 0.002109 | 0.000422 | 0.000427 | 0.000568 | 0.000685 | 6.88E-05 | 0        | 0.000222 | 0.002723 | 0        | 0        | 0        | 0.001504 | 0.00032  | 0.002828 |
| 0.002166 | 0.00094  | 0.001913 | 0        | 0.000847 | 0.00136  | 0        | 0.000319 | 0.005953 | 0        | 0        | 0        | 0.001502 | 0.000677 | 0.002575 |
| 0.003603 | 0.002066 | 0.004746 | 0        | 0.001349 | 0.001477 | 0        | 0.000825 | 0.00918  | 0        | 0        | 0        | 0.00634  | 0        | 0.006864 |
| 0.003893 | 0.00171  | 0.001723 | 0.000216 | 0.000758 | 0.000617 | 0        | 0.002298 | 0.007768 | 0        | 0        | 0        | 0.004146 | 0        | 0.003036 |
| 0.48732  | 0.384613 | 0.524287 | 0.032733 | 0.22987  | 0.181917 | 0.016286 | 0.445224 | 0.672665 | 0.002285 | 0.003483 | 0.020254 | 0.543973 | 0.021063 | 0.594061 |
| 0.054481 | 0.019902 | 0.017318 | 0.003684 | 0.013924 | 0.007756 | 0.002324 | 0.023366 | 0.049153 | 0.000522 | 0        | 0.000273 | 0.035069 | 0.002116 | 0.032039 |
| 0        | 0        | 0        | 0        | 0        | 0.000111 | 0.000297 | 0        | 0.00013  | 0        | 0.000525 | 0        | 6.47E-05 | 0        | 7.58E-05 |
| 0.00053  | 0        | 0.00039  | 0        | 0        | 0.001156 | 0.000279 | 4.42E-05 | 0.000326 | 0        | 0        | 7.85E-05 | 0.000265 | 0.000254 | 0.000361 |
| 0.011488 | 0.013164 | 0.003956 | 0.023158 | 0.005859 | 0.011652 | 0.000576 | 0.001133 | 0.008969 | 0.000811 | 0.018958 | 0.004118 | 0.018789 | 0.005397 | 0.005385 |
| 0.038632 | 0.066974 | 0.013438 | 0.082614 | 0.016428 | 0.03233  | 0.005001 | 0.004614 | 0.044467 | 0.003954 | 0.099471 | 0.023256 | 0.104455 | 0.021759 | 0.024288 |
| 0.000296 | 6.02E-05 | 0.000154 | 0.000375 | 0.000246 | 0.000378 | 0        | 2.76E-05 | 0.000534 | 7.91E-05 | 0.002505 | 7.56E-05 | 0.000759 | 0.000339 | 0.000294 |
| 0.000352 | 0.000306 | 7.85E-05 | 0        | 0.000648 | 0.000342 | 0.000353 | 0        | 0.001289 | 0        | 0.001923 | 0        | 0.000221 | 0.001363 | 0.000725 |
| 0        | 0.00017  | 0.000134 | 0        | 0.000366 | 0        | 0        | 4.70E-05 | 0.000613 | 6.33E-05 | 0.003257 | 0        | 0.000129 | 0.000799 | 0.000152 |
| 0.001015 | 0        | 0.001442 | 0.00042  | 0        | 0.000642 | 0.000595 | 0.000198 | 0        | 0        | 0        | 0        | 0.00043  | 0        | 0        |
| 0.005562 | 0.002189 | 0.000911 | 0.011397 | 0.001673 | 0.00204  | 0.001116 | 0.000189 | 0.00137  | 0.000273 | 0.004776 | 7.85E-05 | 0.001077 | 0.004814 | 0.001438 |
| 0.001562 | 0.000521 | 0.00054  | 0.00092  | 0.00092  | 0.000519 | 0        | 0.001074 | 0.004492 | 0        | 0.00257  | 8.72E-05 | 0.001504 | 0.002247 | 0.001333 |
| 0.005967 | 0.001828 | 0.002908 | 0.007674 | 0.00116  | 0.004139 | 0        | 0.000489 | 0.004724 | 5.93E-05 | 0.001988 | 0        | 0.005693 | 0.000997 | 0.001091 |
| 0.000888 | 0.000134 | 0.000373 | 0.000766 | 0.009152 | 0        | 0.000948 | 0.000854 | 0.000637 | 0.001032 | 0.001269 | 0.000264 | 7.80E-05 | 0.002229 | 6.87E-05 |
| 0.000396 | 0.00017  | 0.000618 | 0        | 0.00346  | 0        | 0.00026  | 0.000293 | 0.001473 | 0        | 0        | 0.000163 | 4.00E-05 | 0.001157 | 0.0004   |
| 0.00208  | 0.000532 | 0.004441 | 0        | 0.011593 | 0.000223 | 0.000595 | 0.00259  | 0.007064 | 5.54E-05 | 0        | 9.88E-05 | 0.001426 | 0.002003 | 0.001557 |
| 0.000837 | 0.001956 | 0.001045 | 0.001067 | 0.001777 | 0.001552 | 0.002343 | 0.00079  | 0.001131 | 0.000945 | 0.002247 | 0.000442 | 0.001289 | 0.001241 | 0.000908 |
| 0.000692 | 0.000102 | 0.001093 | 0.000182 | 0.005655 | 0.000213 | 0.003737 | 0.000495 | 0.000587 | 9.49E-05 | 0.001503 | 0.000825 | 3.43E-05 | 0.003141 | 0.000229 |
| 0.002195 | 0.000409 | 0.000628 | 0.001476 | 0.001808 | 0.003217 | 0        | 0.00107  | 0.000929 | 0.000407 | 0.001107 | 0.001697 | 0.0004   | 0.002953 | 0.001579 |
| 0.000464 | 0.000293 | 0.000184 | 0.000193 | 0.002619 | 0.000152 | 0        | 0.000343 | 6.13E-05 | 0        | 0.002513 | 0.00045  | 0.000582 | 0.001862 | 0.000326 |
| 0.002973 | 0.004305 | 0.002057 | 0.001947 | 0.010616 | 0.027731 | 0.004918 | 0.001047 | 0.000316 | 0.002819 | 0.002036 | 0.008308 | 0.002166 | 0.003056 | 0.001696 |
| 0.000257 | 0.000626 | 0.000534 | 0.000471 | 0.000711 | 0.000924 | 0.001283 | 0.000196 | 0.000306 | 0.000577 | 0.00059  | 0.000317 | 0.000409 | 0.000893 | 0.001054 |
| 0.004731 | 0.00363  | 0.00186  | 0.000426 | 0.017024 | 0.033138 | 0.004546 | 0.029839 | 0        | 0.000138 | 0        | 0.000212 | 0.001306 | 0        | 0.00092  |
| 0.00621  | 0.009414 | 0        | 0.0008   | 0.00046  | 0.001748 | 0.000511 | 2.07E-05 | 0        | 0        | 0        | 0.001636 | 0.001445 | 0.000611 | 0.000379 |
| 0.025819 | 0.018373 | 0.007038 | 0.003519 | 0.000889 | 0.005853 | 0.001376 | 0.00207  | 0        | 0        | 0        | 0.00084  | 0.000828 | 0.001316 | 0.006593 |

|          |          |          |          |          |          |          |          |
|----------|----------|----------|----------|----------|----------|----------|----------|
| HC048    | HC049    | HC050    | HC051    | HC052    | HC053    | HC055    | HC150    |
| 0        | 0        | 0        | 0        | 0        | 0        | 0        | 0        |
| 0        | 0        | 0        | 0        | 0        | 0        | 0        | 0        |
| 0.000266 | 0        | 0.001255 | 0.000196 | 0        | 0.000484 | 0.009652 | 0        |
| 6.58E-05 | 0        | 0.00074  | 0.000306 | 0        | 0.002107 | 0.0006   | 0        |
| 0.000348 | 0        | 0.002028 | 0.000216 | 0        | 0.000414 | 0.008161 | 0        |
| 0.000117 | 0.00063  | 0.000717 | 0.000355 | 0        | 0.001616 | 0.000369 | 0.00016  |
| 0.000804 | 0        | 0.000745 | 0.00018  | 0.000432 | 0.00377  | 0.000559 | 0        |
| 0.005538 | 0.000775 | 0.007371 | 0.002281 | 0.007598 | 0.01165  | 0.001131 | 0.000277 |
| 0.001318 | 0.01216  | 0.069705 | 0.033376 | 0.027536 | 0.014082 | 0.047468 | 0.011828 |
| 0.001022 | 0.009071 | 0.008806 | 0.019649 | 0.038642 | 0.052776 | 0.020083 | 0.00427  |
| 0.000139 | 0.001117 | 0.000547 | 0.002701 | 0.000925 | 0.00329  | 0.001345 | 0.000402 |
| 0        | 0        | 0.000382 | 0.001147 | 0.00033  | 0.000436 | 0.00199  | 0.000109 |
| 6.81E-05 | 0.001138 | 0.004644 | 0.001538 | 0.001465 | 0.003085 | 0.002998 | 0.000665 |
| 0.00063  | 0.000767 | 0.00572  | 0.000996 | 0.001268 | 0.003143 | 0.002673 | 4.65E-05 |
| 0.002011 | 0.004723 | 0.047422 | 0.008215 | 0.021825 | 0.019662 | 0.027396 | 0.004278 |
| 0        | 0        | 0.028422 | 0.016396 | 0.051697 | 0.021765 | 0.009534 | 0        |
| 0        | 0        | 0.000662 | 0.000192 | 0.000744 | 0.001634 | 0        | 0.001009 |
| 0.000987 | 0.008622 | 0.028781 | 0.150661 | 0.015186 | 0.055564 | 0.023463 | 0.007084 |
| 0        | 0.000318 | 0        | 0.000139 | 0.001642 | 0        | 0        | 0        |
| 6.34E-05 | 0.005185 | 0        | 9.79E-05 | 0.001815 | 0.000436 | 0.000921 | 7.08E-05 |
| 0.003362 | 0.014375 | 0.004437 | 0.007386 | 0.002944 | 0.002125 | 0.0086   | 0.009712 |
| 0.000681 | 0.000186 | 0        | 0        | 0.000476 | 8.43E-05 | 0        | 0        |
| 0.000604 | 0.000358 | 0        | 0        | 0        | 0        | 0        | 0.000271 |
| 0.023846 | 0.006208 | 0.030744 | 0.018914 | 0.185383 | 0.047076 | 0.005561 | 0.000962 |
| 0.004878 | 0.003722 | 0.025355 | 0.002714 | 0.006102 | 0.023765 | 0.000517 | 0.002329 |
| 0.00679  | 0.002715 | 0.004736 | 0.002922 | 0.003519 | 0.007052 | 0        | 0.00076  |
| 0.002613 | 0        | 0.000966 | 0.000302 | 0.00222  | 0.001315 | 0        | 0.000135 |
| 0.009319 | 0.002279 | 0.01145  | 0.004509 | 0.014414 | 0.019596 | 0.003291 | 0.000797 |
| 0.01726  | 0.005737 | 0.030551 | 0.004264 | 0.027631 | 0.030532 | 0.005323 | 0.002507 |
| 0.117794 | 0.025895 | 0.069126 | 0.030222 | 0.088374 | 0.252573 | 0.03465  | 0.007973 |
| 0.020188 | 0.00528  | 0.060831 | 0.001338 | 0.016545 | 0.014262 | 0.001576 | 0.000404 |
| 0.008945 | 0.001348 | 0.064449 | 0.000865 | 0.006119 | 0.004766 | 0.002173 | 0.000277 |
| 0.000853 | 0.00165  | 0.002787 | 0.003803 | 0.002492 | 0.001872 | 0.000887 | 0.000109 |
| 0.002223 | 0        | 0.0059   | 0.003195 | 0.003196 | 0.00411  | 0.000911 | 0.00021  |
| 0.001689 | 0.00032  | 0.000345 | 0.001812 | 0.000646 | 0.001634 | 0.000693 | 0        |
| 0.287693 | 0.003409 | 0.014273 | 0.039869 | 0.019612 | 0.120661 | 0.044812 | 0.000166 |
| 0.466313 | 0.003393 | 0.019786 | 0.045023 | 0.022722 | 0.159256 | 0.054022 | 0.000119 |
| 0.000108 | 0.002094 | 0.000768 | 0.001053 | 0.001139 | 0.002209 | 0.000569 | 0.000232 |
| 5.64E-05 | 0.001526 | 0.000202 | 0.001559 | 0.000874 | 0.001905 | 0.000193 | 0.00072  |
| 0        | 0        | 0.002745 | 0.002065 | 0.000479 | 0.000989 | 0.00406  | 0.001991 |
| 0        | 0.000159 | 0.000363 | 0        | 0        | 0        | 0.00099  | 0.000372 |
| 0        | 0.000573 | 0.000773 | 0.000653 | 7.48E-05 | 0        | 0.001024 | 0.001878 |
| 0.002733 | 0.256225 | 0.269886 | 0.101427 | 0.12379  | 0.026443 | 0.296509 | 0.253507 |
| 0        | 0        | 0        | 0        | 0        | 0        | 0.000293 | 0        |
| 0.000197 | 0.00018  | 0.000547 | 0.000722 | 0.00018  | 0.00052  | 0.002046 | 0.0004   |
| 0        | 0.000159 | 0        | 0        | 0        | 0        | 0        | 0.000125 |
| 0.000226 | 0.00127  | 0        | 0        | 0        | 0.000125 | 0.000538 | 0.002834 |
| 0        | 0        | 0        | 0.000102 | 0        | 0        | 0        | 5.66E-05 |
| 7.52E-05 | 0        | 0        | 0        | 0        | 0.00252  | 0        | 0        |
| 0        | 0        | 0        | 0.000151 | 9.52E-05 | 0.000198 | 0        | 0        |
| 0        | 0        | 0        | 0.000106 | 0        | 0        | 0        | 0        |
| 0.000258 | 0.000657 | 0        | 0.001726 | 0.001404 | 0.000766 | 0        | 0.000924 |
| 0        | 0        | 0        | 0        | 0        | 0        | 0        | 0        |
| 0        | 0.000159 | 0.000349 | 0        | 8.50E-05 | 7.33E-05 | 0.011066 | 0.002054 |
| 0        | 0        | 0        | 0        | 7.14E-05 | 0        | 0.001404 | 0        |
| 0        | 0        | 0        | 0.000204 | 0.00018  | 0.001425 | 0.002842 | 9.91E-05 |

|          |          |          |          |          |          |          |          |
|----------|----------|----------|----------|----------|----------|----------|----------|
| 0        | 0        | 0.001283 | 0.000114 | 0.00015  | 0        | 0.008224 | 0.000384 |
| 0        | 0.000334 | 0.000566 | 0.000355 | 9.52E-05 | 0.000528 | 0.004612 | 0.000857 |
| 0.000585 | 0        | 0.005877 | 0.000677 | 0.000558 | 0.005125 | 0.001    | 4.04E-05 |
| 5.64E-05 | 0.00279  | 0.000207 | 0.001151 | 0.001271 | 8.43E-05 | 0.000348 | 0.001342 |
| 0        | 0.003038 | 0.000409 | 0.000543 | 0.000456 | 0.000293 | 0.000152 | 0.003552 |
| 0        | 0.002395 | 0.000207 | 0.000686 | 0.000595 | 9.16E-05 | 0.000945 | 0.001193 |
| 0        | 0.007161 | 0.000391 | 0.002028 | 0.001319 | 7.33E-05 | 0.002046 | 0.006267 |
| 0        | 0.011229 | 0        | 0.005023 | 0.001598 | 0        | 0.002004 | 0.009868 |
| 0        | 0.001528 | 0        | 0.000673 | 0.000629 | 8.06E-05 | 0.000197 | 0.002772 |
| 0.001149 | 0.379287 | 0.002295 | 0.191978 | 0.072791 | 0.014115 | 0.09357  | 0.472202 |
| 5.40E-05 | 0.023554 | 0.000147 | 0.013548 | 0.00873  | 0.001652 | 0.007372 | 0.03669  |
| 0        | 0.000315 | 0.000299 | 0        | 0.000194 | 0        | 0.000172 | 9.50E-05 |
| 0        | 0.003076 | 0.001554 | 0.000869 | 0.000704 | 9.53E-05 | 0.002177 | 0.00166  |
| 0.000705 | 0.022843 | 0.023787 | 0.04224  | 0.040624 | 0.006254 | 0.040673 | 0.017236 |
| 0.003879 | 0.077362 | 0.086705 | 0.120981 | 0.138371 | 0.034155 | 0.127992 | 0.06115  |
| 0        | 0.000474 | 0.001412 | 0.000971 | 0.000265 | 0.000352 | 0        | 0.000758 |
| 0        | 0.001232 | 0.001642 | 0.002053 | 0.001917 | 0.000604 | 0.002901 | 0.000758 |
| 4.23E-05 | 0.00204  | 0.003113 | 0.002122 | 0.001115 | 0.000311 | 0.000683 | 0.000283 |
| 0        | 0.002451 | 0        | 0.000331 | 0        | 0        | 0.0003   | 0.000576 |
| 0.000113 | 0.011547 | 0.004603 | 0.010565 | 0.000999 | 0.001693 | 0.006012 | 0.004241 |
| 0        | 0.001728 | 0.001163 | 0.030418 | 0.000571 | 0.000744 | 0.016388 | 0.002406 |
| 0        | 0.022044 | 0.003214 | 0.02135  | 0.000952 | 0.00018  | 0.014408 | 0.010436 |
| 7.99E-05 | 0.000831 | 0.003863 | 0.010394 | 0.001003 | 0.002806 | 0.000521 | 0        |
| 0        | 0.001467 | 0.000216 | 0.001485 | 0.00051  | 0        | 0.001263 | 0.000239 |
| 0.000322 | 0.006068 | 0.000152 | 0.008133 | 0.002658 | 0.00037  | 0.00375  | 0.000835 |
| 0.000489 | 0.002083 | 0.002019 | 0.00053  | 0.000724 | 0.000894 | 0.00129  | 0.001585 |
| 0        | 0.002906 | 0.009583 | 0.001755 | 0.002597 | 0.000769 | 0.002377 | 0.000271 |
| 0        | 0.001658 | 0.004387 | 0.000514 | 0.000789 | 0.000297 | 0.000335 | 0.002988 |
| 7.75E-05 | 0.00035  | 0.002626 | 0.000563 | 0.000415 | 0.000169 | 0        | 0.000412 |
| 0.000237 | 0.000737 | 0.001793 | 0.001192 | 0.005728 | 0.002202 | 0.005968 | 0.001346 |
| 0        | 0.000161 | 0.000786 | 0.000539 | 0.001006 | 0.000872 | 0.001018 | 0.000758 |
| 0        | 0.014736 | 0.001554 | 0.010018 | 0.003277 | 0.000927 | 0.001494 | 0.009128 |
| 6.58E-05 | 0        | 0.00034  | 0.000249 | 0.002815 | 0.000198 | 0.000103 | 0.000962 |
| 6.34E-05 | 0.008194 | 0.004493 | 0.000404 | 0.002703 | 0.0003   | 0.006813 | 0.024585 |

Table S20. The corresponding LDA value and p value of the biomarkers among the CP (n=72), CPR (n=22), and HC (n=150) groups.

| Biomaker_names                                                                                                                  | Logarithm value | Group | LDA_value  | P_value   |
|---------------------------------------------------------------------------------------------------------------------------------|-----------------|-------|------------|-----------|
| d_Bacteria.p__Proteobacteria.c__Betaproteobacteria.o__Burkholderiales.f__Comamonadaceae.g__Tepidimonas                          | 0.477121255     |       | -          |           |
| d_Bacteria.p__Proteobacteria.c__Betaproteobacteria.o__Burkholderiales.f__Alcaligenaceae.g__Sutterella                           | 0.481123997     |       | -          |           |
| d_Bacteria.p__Proteobacteria.c__Betaproteobacteria.o__Burkholderiales.f__Comamonadaceae.g__Schlegelella                         | 0.788089773     |       | -          |           |
| d_Bacteria.p__Proteobacteria.c__Gammaproteobacteria.o__Oceanospirillales.f__Halomonadaceae.g__Halomonas                         | 4.126376691     | HC    | 3.9269711  | 1.48E-05  |
| d_Bacteria.p__Actinobacteria.c__Actinobacteria.o__Propionibacteriales.f__Propionibacteriaceae.g__Propionibacterium              | 1.073616535     |       | -          |           |
| d_Bacteria.p__Firmicutes.c__Erysipelotrichia.o__Erysipelotrichales.f__Erysipelotrichaceae.g__Eggerthia                          | 0.35666312      |       | -          |           |
| d_Bacteria.p__Proteobacteria.c__Betaproteobacteria.o__Burkholderiales.f__Comamonadaceae.g__Delftia                              | 1.015918334     |       | -          |           |
| d_Bacteria.p__Proteobacteria.c__Gammaproteobacteria.o__Xanthomonadales.f__Xanthomonadaceae.g__Stenotrophomonas                  | 1.452297671     |       | -          |           |
| d_Bacteria.p__Firmicutes.c__Clostridia.o__Clostridiales.f__Lachnospiraceae.g__Stomatobaculum                                    | 3.814362633     |       | -          |           |
| d_Bacteria.p__Firmicutes.c__Clostridia.o__Clostridiales.f__Lachnospiraceae.g__Lachnospiraceae_Incertae_Sedis                    | 1.265538426     |       | -          |           |
| d_Bacteria.p__Firmicutes.c__Clostridia.o__Clostridiales.f__Ruminococcaceae.g__Oscillibacter                                     | 0.172051281     |       | -          |           |
| d_Bacteria.p__Proteobacteria.c__Gammaproteobacteria.o__Xanthomonadales.f__Xanthomonadaceae.g__Silanimonas                       | 0.091080469     |       | -          |           |
| d_Bacteria.p__Verrucomicrobia.c__Verrucomicrobiae.o__Verrucomicrobiales.f__Verrucomicrobiaceae.g__Akkermansia                   | 0.333111263     |       | -          |           |
| d_Bacteria.p__Proteobacteria.c__Epsilonproteobacteria.o__Campylobacteriales.f__Helicobacteraceae.g__Rs_M59_termite_group        | 0               |       | -          |           |
| d_Bacteria.p__Fusobacteria.c__Fusobacteriia.o__Fusobacteriales.f__Leptotrichiaceae.g__Leptotrichiaceae_uncultured               | 1.446433603     |       | -          |           |
| d_Bacteria.p__Proteobacteria.c__Gammaproteobacteria.o__Cardiobacteriales.f__Cardiobacteriaceae.g__Cardiobacterium               | 2.059285663     |       | 0.00450191 |           |
| d_Bacteria.p__Proteobacteria.c__Gammaproteobacteria.o__Xanthomonadales.f__Xanthomonadaceae.g__Thermomonas                       | 0               |       | -          |           |
| d_Bacteria.p__Proteobacteria.c__Gammaproteobacteria.o__Aeromonadales.f__Aeromonadaceae.g__Aeromonas                             | 0.298003541     |       | -          |           |
| d_Bacteria.p__Actinobacteria.c__Actinobacteria.o__Bifidobacteriales.f__Bifidobacteriaceae.g__Bifidobacterium                    | 1.568201724     |       | -          |           |
| d_Bacteria.p__Proteobacteria.c__Deltaproteobacteria.o__Desulfobivibrionales.f__Desulfobivibrionaceae.g__Bilophila               | 0.082186756     |       | -          |           |
| d_Bacteria.p__Bacteroidetes.c__Flavobacteriia.o__Flavobacteriales.f__Flavobacteriaceae.g__Capnocytophaga                        | 4.180383966     | CPR   | 3.7856868  | 7.52E-07  |
| d_Bacteria.p__Firmicutes.c__Negativicutes.o__Selenomonadales.f__Veillonellaceae.g__Selenomonas                                  | 3.35855875      |       | -          |           |
| d_Bacteria.p__Actinobacteria.c__Actinobacteria.o__Actinomycetales.f__Actinomycetaceae.g__Mobiluncus                             | 1.637239488     |       | -          |           |
| d_Bacteria.p__Proteobacteria.c__Gammaproteobacteria.o__Chromatiales.f__Granulosicoccaceae.g__Granulosicoccus                    | 0               |       | -          |           |
| d_Bacteria.p__Firmicutes.c__Negativicutes.o__Selenomonadales.f__Veillonellaceae.g__Megamonas                                    | 0.639597152     |       | -          |           |
| d_Bacteria.p__Firmicutes.c__Clostridia.o__Clostridiales.f__Clostridiales_Family_XIII.g__Clostridiales_Family_XIII               | 0.635427893     |       | -          |           |
| d_Bacteria.p__Firmicutes.c__Clostridia.o__Clostridiales.f__Clostridiales_Family_XIII.g__Clostridiales_Family_XIII_uncultured    | 2.616244389     |       | 2.95E-06   |           |
| d_Bacteria.p__Proteobacteria.c__Betaproteobacteria.o__Burkholderiales.f__Alcaligenaceae.g__Alcaligenes                          | 0               |       | -          |           |
| d_Bacteria.p__Proteobacteria.c__Betaproteobacteria.o__Neisseriales.f__Neisseriaceae.g__Alysiella                                | 1.831054963     |       | -          |           |
| d_Bacteria.p__Firmicutes.c__Erysipelotrichia.o__Erysipelotrichales.f__Erysipelotrichaceae.g__Erysipelotrichaceae_Incertae_Sedis | 0.528273777     |       | -          |           |
| d_Bacteria.p__Proteobacteria.c__Alphaproteobacteria.o__Sphingomonadales.f__DSSF69.g__DSSF69_norank                              | 0               |       | -          |           |
| d_Bacteria.p__Firmicutes.c__Erysipelotrichia.o__Erysipelotrichales.f__Erysipelotrichaceae.g__Solobacterium                      | 3.747678466     | HC    | 3.1780418  | 2.13E-10  |
| d_Bacteria.p__Proteobacteria.c__Betaproteobacteria.o__Methylophilales.f__Methylophilaceae.g__Methylophilus                      | 0               |       | -          |           |
| d_Bacteria.p__Firmicutes.c__Clostridia.o__Clostridiales.f__Peptostreptococcaceae.g__Filiifactor                                 | 2.675350556     | HC    | 2.3352554  | 1.41E-09  |
| d_Bacteria.p__Actinobacteria.c__Actinobacteria.o__Bifidobacteriales.f__Bifidobacteriaceae.g__Gardnerella                        | 0               |       | -          |           |
| d_Bacteria.p__Actinobacteria.c__Actinobacteria.o__Coriobacteriales.f__Coriobacteriaceae.g__Olsenella                            | 2.339506649     |       | -          |           |
| d_Bacteria.p__Firmicutes.c__Bacilli.o__Bacillales.f__Paenibacillaceae.g__Brevibacillus                                          | 0               |       | -          |           |
| d_Bacteria.p__Firmicutes.c__Negativicutes.o__Selenomonadales.f__Veillonellaceae.g__Centipeda                                    | 1.912561539     |       | 3.50E-06   |           |
| d_Bacteria.p__Deinococcus_Thermus.c__Deinococci.o__Thermales.f__Thermaceae.g__Thermus                                           | 0               |       | -          |           |
| d_Bacteria.p__Spirochaetae.c__Spirochaetes.o__Spirochaetales.f__Spirochaetaceae.g__Treponema                                    | 1.733286452     |       | 0.03126509 |           |
| d_Bacteria.p__Firmicutes.c__Bacilli.o__Bacillales.f__Listeriaceae.g__Brochothrix                                                | 0               |       | -          |           |
| d_Bacteria.p__Firmicutes.c__Clostridia.o__Clostridiales.f__Peptostreptococcaceae.g__Peptostreptococcaceae_Incertae_Sedis        | 2.532032077     |       | 6.11E-07   |           |
| d_Bacteria.p__Firmicutes.c__Clostridia.o__Clostridiales.f__Ruminococcaceae.g__Fastidiosipila                                    | 0               |       | -          |           |
| d_Bacteria.p__Proteobacteria.c__Gammaproteobacteria.o__Xanthomonadales.f__Xanthomonadaceae.g__Xanthomonadaceae_uncultured       | 3.022035005     |       | -          |           |
| d_Bacteria.p__Proteobacteria.c__Alphaproteobacteria.o__Rhizobiales.f__Phyllobacteriaceae.g__Aliihoeiflea                        | 1.610943923     |       | -          |           |
| d_Bacteria.p__Firmicutes.c__Negativicutes.o__Selenomonadales.f__Veillonellaceae.g__Veillonella                                  | 5.148748302     | CPR   | 4.470652   | 0.0003512 |
| d_Bacteria.p__Proteobacteria.c__Gammaproteobacteria.o__Pseudomonadales.f__Moraxellaceae.g__Acinetobacter                        | 1.227601079     |       | -          |           |
| d_Bacteria.p__Proteobacteria.c__Epsilonproteobacteria.o__Campylobacteriales.f__Campylobacteraceae.g__Arcobacter                 | 0               |       | -          |           |
| d_Bacteria.p__Bacteroidetes.c__Flavobacteriia.o__Flavobacteriales.f__Flavobacteriaceae.g__Maribacter                            | 0               |       | -          |           |
| d_Bacteria.p__Bacteroidetes.c__Bacteroidia.o__Bacteroidales.f__Rikenellaceae.g__Alistipes                                       | 0.54750122      |       | -          |           |
| d_Bacteria.p__Bacteroidetes.c__Bacteroidia.o__Bacteroidales.f__Porphyromonadaceae.g__Porphyromonas                              | 4.952597443     | HC    | 4.4530301  | 8.65E-11  |
| d_Bacteria.p__Proteobacteria.c__Gammaproteobacteria.o__Enterobacteriales.f__Enterobacteriaceae.g__Rahnella                      | 0.266519145     |       | -          |           |
| d_Bacteria.p__Firmicutes.c__Clostridia.o__Clostridiales.f__Lachnospiraceae.g__Catonella                                         | 3.101793924     | CPR   | 2.5765293  | 2.60E-06  |
| d_Bacteria.p__Bacteroidetes.c__Sphingobacteriia.o__Sphingobacteriales.f__WCHB1_69.g__WCHB1_69_norank                            | 0.870793932     |       | -          |           |

|                                                                                                                      |             |     |           |            |
|----------------------------------------------------------------------------------------------------------------------|-------------|-----|-----------|------------|
| d_Bacteria.p_Firmicutes.c_Clostridia.o_Clostridiales.f_Eubacteriaceae.g_Eubacterium                                  | 0           | -   |           |            |
| d_Bacteria.p_Bacteroidetes.c_Bacteroidia.o_Bacteroidales.f_Bacteroidales_Incertae_Sedis.g_Phocaeicola                | 1.099316083 | -   |           |            |
| d_Bacteria.p_Bacteroidetes.c_Flavobacteriia.o_Flavobacteriales.f_Flavobacteriaceae.g_Empedobacter                    | 0           | -   |           |            |
| d_Bacteria.p_Cyanobacteria.c_Cyanobacteria.o_SubsectionIII.f_FamilyI.g_Microcoleus                                   | 0           | -   |           |            |
| d_Bacteria.p_Bacteroidetes.c_Flavobacteriia.o_Flavobacteriales.f_Flavobacteriaceae.g_Elizabethingia                  | 0           | -   |           |            |
| d_Bacteria.p_Proteobacteria.c_Alphaproteobacteria.o_Rhodobacterales.f_Rhodobacteraceae.g_Rhodobacteraceae_uncultured | 0           | -   |           |            |
| d_Bacteria.p_Firmicutes.c_Clostridia.o_Clostridiales.f_Lachnospiraceae.g_Butyrvibrio                                 | 2.600774949 | -   |           |            |
| d_Bacteria.p_Firmicutes.c_Bacilli.o_Lactobacillales.f_Aerococcaceae.g_Aerococcus                                     | 0           | -   |           |            |
| d_Bacteria.p_Actinobacteria.c_Actinobacteria.o_Frankiales.f_Sporichthyaceae.g_hgcI_clade                             | 0           | -   |           |            |
| d_Bacteria.p_Firmicutes.c_Erysipelotrichia.o_Erysipelotrichales.f_Erysipelotrichaceae.g_Catenibacterium              | 0           | -   |           |            |
| d_Bacteria.p_Proteobacteria.c_Gammaproteobacteria.o_Alteromonadales.f_Shewanellaceae.g_Shewanella                    | 0.903843317 | -   |           |            |
| d_Bacteria.p_Bacteroidetes.c_Flavobacteriia.o_Flavobacteriales.f_Flavobacteriaceae.g_Chryseobacterium                | 0.35666312  | -   |           |            |
| d_Bacteria.p_Proteobacteria.c_Alphaproteobacteria.o_Sphingomonadales.f_Sphingomonadaceae.g_Sphingobium               | 0.522878745 | -   |           |            |
| d_Bacteria.p_Proteobacteria.c_Alphaproteobacteria.o_Rhodospirillales.f_Acetobacteraceae.g_Roseomonas                 | 0           | -   |           |            |
| d_Bacteria.p_Firmicutes.c_Clostridia.o_Clostridiales.f_Clostridiaceae.g_Clostridium_sensu_stricto                    | 0.781036939 | -   |           |            |
| d_Bacteria.p_Proteobacteria.c_Betaproteobacteria.o_Burkholderiales.f_Comamonadaceae.g_Aquabacterium                  | 0           | -   |           |            |
| d_Bacteria.p_Synergistetes.c_Synergistia.o_Synergistales.f_Synergistaceae.g_Fretibacterium                           | 0.996365715 | -   |           |            |
| d_Bacteria.p_Proteobacteria.c_Alphaproteobacteria.o_Rhizobiales.f_Hyphomicrobiaceae.g_Pelagibacterium                | 3.11224741  | -   |           |            |
| d_Bacteria.p_Proteobacteria.c_Gammaproteobacteria.o_Pasteurellales.f_Pasteurellaceae.g_Haemophilus                   | 4.705801413 | HC  | 4.337831  | 5.34E-17   |
| d_Bacteria.p_Firmicutes.c_Clostridia.o_Clostridiales.f_Clostridiales_Family_XI.g_Anaerococcus                        | 0           | -   |           |            |
| d_Bacteria.p_Tenericutes.c_Mollicutes.o_RF9.f_RF9_norank.g_RF9_norank                                                | 1.827756863 | -   |           |            |
| d_Bacteria.p_BD1_5.c_BD1_5_norank.o_BD1_5_norank.f_BD1_5_norank.g_BD1_5_norank                                       | 1.367355921 | -   |           |            |
| d_Bacteria.p_Proteobacteria.c_Alphaproteobacteria.o_Rhodospirillales.f_Rhodospirillaceae.g_Thalassospira             | 0           | -   |           |            |
| d_Bacteria.p_Proteobacteria.c_Alphaproteobacteria.o_Rhodobacterales.f_Rhodobacteraceae.g_Rhodobacter                 | 0           | -   |           |            |
| d_Bacteria.p_Firmicutes.c_Clostridia.o_Clostridiales.f_Clostridiales_Family_XI.g_Finegoldia                          | 0.280274774 | -   |           |            |
| d_Bacteria.p_Deinococcus_Thermus.c_Deinococci.o_Deinococcales.f_Deinococcaceae.g_Deinococcus                         | 0.184060189 | -   |           |            |
| d_Bacteria.p_Bacteroidetes.c_Bacteroidia.o_Bacteroidales.f_PeH15.g_PeH15_norank                                      | 0           | -   |           |            |
| d_Bacteria.p_Tenericutes.c_Mollicutes.o_Mycoplasmatales.f_Mycoplasmataceae.g_Mycoplasma                              | 0.809865664 | -   |           |            |
| d_Bacteria.p_Proteobacteria.c_Gammaproteobacteria.o_Xanthomonadales.f_Xanthomonadaceae.g_Xanthomonas                 | 0           | -   |           |            |
| d_Bacteria.p_Firmicutes.c_Clostridia.o_Clostridiales.f_Christensenellaceae.g_Christensenella                         | 0           | -   |           |            |
| d_Bacteria.p_Proteobacteria.c_Gammaproteobacteria.o_Pasteurellales.f_Pasteurellaceae.g_Actinobacillus                | 1.498494343 | -   |           |            |
| d_Bacteria.p_Proteobacteria.c_Alphaproteobacteria.o_Sphingomonadales.f_Sphingomonadaceae.g_Sphingomonas              | 0.828659897 | -   |           |            |
| d_Bacteria.p_Firmicutes.c_Clostridia.o_Clostridiales.f_Ruminococcaceae.g_Oscillospira                                | 0           | -   |           |            |
| d_Bacteria.p_Proteobacteria.c_Betaproteobacteria.o_Hydrogenophilales.f_Hydrogenophilaceae.g_Tepidiphilus             | 0           | -   |           |            |
| d_Bacteria.p_Firmicutes.c_Clostridia.o_Clostridiales.f_Lachnospiraceae.g_Pseudobutyrvibrio                           | 1.193820026 | -   |           |            |
| d_Bacteria.p_Proteobacteria.c_Betaproteobacteria.o_Neisseriales.f_Neisseriaceae.g_Neisseria                          | 5.353203532 | CPR | 4.6038465 | 0.04213893 |
| d_Bacteria.p_Firmicutes.c_Negativicutes.o_Selenomonadales.f_Veillonellaceae.g_Anaeroglobus                           | 1.180492254 | -   |           |            |
| d_Bacteria.p_Actinobacteria.c_Actinobacteria.o_Coriobacteriales.f_Coriobacteriaceae.g_Enterorhabdus                  | 0           | -   |           |            |
| d_Bacteria.p_Proteobacteria.c_Gammaproteobacteria.o_Pseudomonadales.f_Moraxellaceae.g_Psychrobacter                  | 0           | -   |           |            |
| d_Bacteria.p_Firmicutes.c_Bacilli.o_Bacillales.f_Bacillaceae.g_Anoxybacillus                                         | 0           | -   |           |            |
| d_Bacteria.p_Proteobacteria.c_Gammaproteobacteria.o_Enterobacteriales.f_Enterobacteriaceae.g_Enterobacter            | 0           | -   |           |            |
| d_Bacteria.p_Firmicutes.c_Clostridia.o_Clostridiales.f_Clostridiales_Family_XI.g_Parvimonas                          | 3.260150922 | HC  | 2.8257266 | 5.28E-11   |
| d_Bacteria.p_Proteobacteria.c_Alphaproteobacteria.o_Caulobacterales.f_Caulobacteraceae.g_Brevundimonas               | 0.700126582 | -   |           |            |
| d_Bacteria.p_Firmicutes.c_Clostridia.o_Clostridiales.f_vadinBB60.g_vadinBB60_norank                                  | 1.358061815 | -   |           |            |
| d_Bacteria.p_Actinobacteria.c_Actinobacteria.o_Corynebacteriales.f_Corynebacteriaceae.g_Corynebacterium              | 3.279129827 | HC  | 2.7849779 | 0.00149826 |
| d_Bacteria.p_Proteobacteria.c_Betaproteobacteria.o_Rhodocyclales.f_Rhodocyclaceae.g_Sulfuritalea                     | 0           | -   |           |            |
| d_Bacteria.p_Firmicutes.c_Clostridia.o_Clostridiales.f_Clostridiales_Family_XI.g_Murdochella                         | 0.214549511 | -   |           |            |
| d_Bacteria.p_Actinobacteria.c_Actinobacteria.o_Micrococcales.f_Microbacteriaceae.g_Frigoribacterium                  | 0           | -   |           |            |
| d_Bacteria.p_Proteobacteria.c_Epsilonproteobacteria.o_Campylobacterales.f_Campylobacteraceae.g_Campylobacter         | 3.580084797 | CPR | 3.2626014 | 2.33E-13   |
| d_Bacteria.p_Chloroflexi.c_Anaerolineae.o_Anaerolineales.f_Anaerolineaceae.g_Anaerolineaceae_uncultured              | 0.464886798 | -   |           |            |
| d_Bacteria.p_Actinobacteria.c_Actinobacteria.o_Micrococcales.f_Micrococcaceae.g_Micrococcus                          | 0           | -   |           |            |
| d_Bacteria.p_Bacteroidetes.c_Cytophagia.o_Cytophagales.f_Cytophagaceae.g_Rhodocytophaga                              | 0           | -   |           |            |
| d_Bacteria.p_Firmicutes.c_Clostridia.o_Clostridiales.f_Lachnospiraceae.g_Oribacterium                                | 3.874971763 | CPR | 3.2007671 | 1.89E-06   |
| d_Bacteria.p_Firmicutes.c_Negativicutes.o_Selenomonadales.f_Veillonellaceae.g_Dialister                              | 2.412693826 | -   |           |            |
| d_Bacteria.p_Firmicutes.c_Clostridia.o_Clostridiales.f_Christensenellaceae.g_Christensenellaceae_uncultured          | 0.907052884 | -   |           |            |
| d_Bacteria.p_Lentisphaerae.c_Lentisphaeria.o_Victivallales.f_Victivallaceae.g_Victivallis                            | 0           | -   |           |            |
| d_Bacteria.p_Actinobacteria.c_Actinobacteria.o_Propionibacteriales.f_Nocardioidaceae.g_Nocardioides                  | 0           | -   |           |            |
| d_Bacteria.p_Proteobacteria.c_Gammaproteobacteria.o_Enterobacteriales.f_Enterobacteriaceae.g_Escherichia_Shigella    | 1.421055229 | -   |           |            |

a

|                                                                                                                                                                     |             |     |           |            |
|---------------------------------------------------------------------------------------------------------------------------------------------------------------------|-------------|-----|-----------|------------|
| d_Bacteria.p_Fusobacteria.c_Fusobacteriia.o_Fusobacteriales.f_ASCC02.g_ASCC02_norank                                                                                | 2.33184553  |     |           | 0.00032349 |
| d_Bacteria.p_Firmicutes.c_Bacilli.o_Bacillales.f_Paenibacillaceae.g_Paenibacillus                                                                                   | 0.011899223 |     |           | -          |
| d_Bacteria.p_Bacteroidetes.c_Bacteroidia.o_Bacteroidales.f_p_2534_18B5_gut_group.g_p_2534_18B5_gut_group_norank                                                     | 0           |     |           | -          |
| d_Bacteria.p_Proteobacteria.c_Betaproteobacteria.o_Neisseriales.f_Neisseriaceae.g_Snodgrassella                                                                     | 0           |     |           | -          |
| d_Bacteria.p_Proteobacteria.c_Betaproteobacteria.o_Burkholderiales.f_Burkholderiaceae.g_Lautropia                                                                   | 2.961162123 | CPR | 2.4717256 | 3.28E-07   |
| d_Bacteria.p_Proteobacteria.c_Gammaproteobacteria.o_Xanthomonadales.f_Xanthomonadaceae.g_Pseudoxanthomonas                                                          | 0           |     |           | -          |
| d_Bacteria.p_Proteobacteria.c_Alphaproteobacteria.o_Rhizobiales.f_Methylobacteriaceae.g_Methylobacterium                                                            | 0.69019608  |     |           | -          |
| d_Bacteria.p_Proteobacteria.c_Betaproteobacteria.o_Burkholderiales.f_Comamonadaceae.g_Comamonas                                                                     | 1.540670678 |     |           | -          |
| d_Bacteria.p_Firmicutes.c_Bacilli.o_Lactobacillales.f_Carnobacteriaceae.g_Atopostipes                                                                               | 0.017728767 |     |           | -          |
| d_Bacteria.p_Firmicutes.c_Clostridia.o_Clostridiales.f_Lachnospiraceae.g_Lachnospira                                                                                | 0.618396788 |     |           | -          |
| d_Bacteria.p_Proteobacteria.c_Betaproteobacteria.o_Burkholderiales.f_Alcigenaceae.g_Parasutterella                                                                  | 0.500602351 |     |           | -          |
| d_Bacteria.p_Firmicutes.c_Bacilli.o_Lactobacillales.f_Aerococcaceae.g_Abiotrophia                                                                                   | 1.94470694  |     |           | -          |
| d_Bacteria.p_Proteobacteria.c_Betaproteobacteria.o_Rhodocyclales.f_Rhodocyclaceae.g_Propionivibrio                                                                  | 0           |     |           | -          |
| d_Bacteria.p_Actinobacteria.c_Actinobacteria.o_Corynebacteriales.f_Corynebacteriaceae.g_Corynebacteriaceae_uncultured                                               | 0           |     |           | -          |
| d_Bacteria.p_Firmicutes.c_Clostridia.o_Clostridiales.f_Lachnospiraceae.g_Blautia                                                                                    | 1.560471226 |     |           | -          |
| d_Bacteria.p_Bacteroidetes.c_Bacteroidia.o_Bacteroidales.f_Rikenellaceae.g_RC9_gut_group                                                                            | 1.626066494 |     |           | -          |
| d_Bacteria.p_Firmicutes.c_Clostridia.o_Clostridiales.f_Lachnospiraceae.g_Coprococcus                                                                                | 0.550907469 |     |           | -          |
| d_Bacteria.p_Proteobacteria.c_Betaproteobacteria.o_Burkholderiales.f_Burkholderiaceae.g_Ralstonia                                                                   | 0           |     |           | -          |
| d_Bacteria.p_Cyanobacteria.c_Cyanobacteria.o_SubsectionII.f_FamilyII.g_Chroococcidiopsis                                                                            | 0           |     |           | -          |
| d_Bacteria.p_Proteobacteria.c_Gammaproteobacteria.o_Pseudomonadales.f_Pseudomonadaceae.g_Pseudomonas                                                                | 1.609949951 |     |           | -          |
| d_Bacteria.p_Proteobacteria.c_Alphaproteobacteria.o_Sphingomonadales.f_Sphingomonadaceae.g_Novosphingobium                                                          | 0.151267675 |     |           | -          |
| d_Bacteria.p_Firmicutes.c_Bacilli.o_Lactobacillales.f_Streptococcaceae.g_Streptococcus                                                                              | 4.938603641 | HC  | 4.5089145 | 3.97E-06   |
| d_Bacteria.p_Actinobacteria.c_Actinobacteria.o_Actinomycetales.f_Actinomycetaceae.g_Actinobaculum                                                                   | 1.795686955 |     |           | -          |
| d_Bacteria.p_Proteobacteria.c_Deltaproteobacteria.o_Desulfobivibrionales.f_Desulfobivibrionaceae.g_Desulfobivibrio                                                  | 0.312459457 |     |           | -          |
| d_Bacteria.p_Proteobacteria.c_Alphaproteobacteria.o_Rickettsiales.f_mitochondria.g_mitochondria_norank                                                              | 1.600095197 |     |           | -          |
| d_Bacteria.p_Proteobacteria.c_Gammaproteobacteria.o_Alteromonadales.f_Pseudoalteromonadaceae.g_Pseudoalteromonas                                                    | 0           |     |           | -          |
| d_Bacteria.p_Proteobacteria.c_Gammaproteobacteria.o_Chromatiales.f_Chromatiaceae.g_Rheinheimera                                                                     | 0           |     |           | -          |
| d_Bacteria.p_Bacteroidetes.c_Bacteroidia.o_Bacteroidales.f_Prevotellaceae.g_Alloprevotella                                                                          | 3.937016107 | CPR | 3.5112551 | 4.54E-07   |
| d_Bacteria.p_Bacteroidetes.c_Bacteroidia.o_Bacteroidales.f_Prevotellaceae.g_Paraprevotella                                                                          | 0           |     |           | -          |
| d_Bacteria.p_Firmicutes.c_Bacilli.o_Lactobacillales.f_Carnobacteriaceae.g_Dolosigranulum                                                                            | 0           |     |           | -          |
| d_Bacteria.p_Firmicutes.c_Clostridia.o_Clostridiales.f_Ruminococcaceae.g_Subdoligranulum                                                                            | 1.480773232 |     |           | -          |
| d_Bacteria.p_Firmicutes.c_Bacilli.o_Lactobacillales.f_Leuconostocaceae.g_Weissella                                                                                  | 0           |     |           | -          |
| d_Bacteria.p_Firmicutes.c_Clostridia.o_Clostridiales.f_Lachnospiraceae.g_Lachnospiraceae_uncultured                                                                 | 3.191796332 |     |           | -          |
| d_Bacteria.p_Proteobacteria.c_Betaproteobacteria.o_Neisseriales.f_Neisseriaceae.g_Kingella                                                                          | 2.61057145  |     |           | -          |
| d_Bacteria.p_Firmicutes.c_Clostridia.o_Clostridiales.f_Ruminococcaceae.g_Papillibacter                                                                              | 0           |     |           | -          |
| d_Bacteria.p_Candidate_division_TM7.c_Candidate_division_TM7_norank.o_Candidate_division_TM7_norank.f_Candidate_division_TM7_norank.g_Candidate_division_TM7_norank | 3.888936555 |     |           | -          |
| d_Bacteria.p_Firmicutes.c_Clostridia.o_Clostridiales.f_Clostridiales_Family_XIII.g_Clostridiales_Family_XIII_Incertae_Sedis                                         | 3.927585233 | HC  | 3.4981901 | 4.13E-15   |
| d_Bacteria.p_Actinobacteria.c_Actinobacteria.o_Micrococcales.f_Dermabacteraceae.g_Brachybacterium                                                                   | 0           |     |           | -          |
| d_Bacteria.p_Proteobacteria.c_Alphaproteobacteria.o_Rhizobiales.f_F0723.g_F0723_norank                                                                              | 0           |     |           | -          |
| d_Bacteria.p_Firmicutes.c_Erysipelotrichia.o_Erysipelotrichales.f_Erysipelotrichaceae.g_Holdemania                                                                  | 0           |     |           | -          |
| d_Bacteria.p_Bacteroidetes.c_Bacteroidia.o_Bacteroidales.f_Prevotellaceae.g_Prevotellaceae_uncultured                                                               | 1.132562067 |     |           | -          |
| d_Bacteria.p_Proteobacteria.c_Gammaproteobacteria.o_Enterobacteriales.f_Enterobacteriaceae.g_Citrobacter                                                            | 3.75594647  |     |           | -          |
| d_Bacteria.p_Firmicutes.c_Clostridia.o_Clostridiales.f_Lachnospiraceae.g_Roseburia                                                                                  | 0.61248952  |     |           | -          |
| d_Bacteria.p_Synergistetes.c_Synergistia.o_Synergistales.f_Synergistaceae.g_Synergistes                                                                             | 0           |     |           | -          |
| d_Bacteria.p_Firmicutes.c_Clostridia.o_Clostridiales.f_Ruminococcaceae.g_Ruminococcaceae_uncultured                                                                 | 3.240174695 |     |           | -          |
| d_Bacteria.p_Firmicutes.c_Erysipelotrichia.o_Erysipelotrichales.f_Erysipelotrichaceae.g_Erysipelotrichaceae_uncultured                                              | 0.728624286 |     |           | -          |
| d_Bacteria.p_Firmicutes.c_Bacilli.o_Lactobacillales.f_Leuconostocaceae.g_Leuconostoc                                                                                | 0.43713373  |     |           | -          |
| d_Bacteria.p_Firmicutes.c_Clostridia.o_Clostridiales.f_Defluviitaleaceae.g_Defluviitaleaceae_Incertae_Sedis                                                         | 0           |     |           | -          |
| d_Bacteria.p_Actinobacteria.c_Actinobacteria.o_Corynebacteriales.f_Mycobacteriaceae.g_Mycobacterium                                                                 | 0           |     |           | -          |
| d_Bacteria.p_Firmicutes.c_Negativicutes.o_Selenomonadales.f_Acidaminococcaceae.g_Acidaminococcus                                                                    | 0.034762106 |     |           | -          |
| d_Bacteria.p_Bacteroidetes.c_Bacteroidia.o_Bacteroidales.f_Porphyrimonadaceae.g_Parabacteroides                                                                     | 1.160004439 |     |           | -          |
| d_Bacteria.p_Proteobacteria.c_Alphaproteobacteria.o_Caulobacterales.f_Caulobacteraceae.g_Caulobacter                                                                | 0           |     |           | -          |
| d_Bacteria.p_Bacteroidetes.c_Flavobacteriia.o_Flavobacteriales.f_Flavobacteriaceae.g_Bergeyella                                                                     | 2.804480189 | CPR | 2.2892129 | 4.19E-11   |
| d_Bacteria.p_Firmicutes.c_Negativicutes.o_Selenomonadales.f_Veillonellaceae.g_Veillonellaceae_uncultured                                                            | 0.531833588 |     |           | -          |
| d_Bacteria.p_Actinobacteria.c_Actinobacteria.o_Micrococcales.f_Micrococcaceae.g_Kocuria                                                                             | 0           |     |           | -          |

|                                                                                                                                                                     |             |     |           |            |
|---------------------------------------------------------------------------------------------------------------------------------------------------------------------|-------------|-----|-----------|------------|
| d_Bacteria.p_Firmicutes.c_Erysipelotrichia.o_Erysipelotrichales.f_Erysipelotrichaceae.g_Asteroleplasma                                                              | 0.397940009 | -   |           |            |
| d_Bacteria.p_Bacteroidetes.c_Sphingobacteriia.o_Sphingobacteriales.f_Saprospiraceae.g_Portibacter                                                                   | 0           | -   |           |            |
| d_Bacteria.p_Actinobacteria.c_Actinobacteria.o_Bifidobacteriales.f_Bifidobacteriaceae.g_Parascardovia                                                               | 0.887742295 | -   |           |            |
| d_Bacteria.p_Bacteroidetes.c_Bacteroidia.o_Bacteroidales.f_Porphyromonadaceae.g_Butyricimonas                                                                       | 0           | -   |           |            |
| d_Bacteria.p_Proteobacteria.c_Gammaproteobacteria.o_Vibrionales.f_Vibrionaceae.g_Vibrio                                                                             | 0           | -   |           |            |
| d_Bacteria.p_Firmicutes.c_Negativicutes.o_Selenomonadales.f_Veillonellaceae.g_Allisonella                                                                           | 0.920818754 | -   |           |            |
| d_Bacteria.p_Firmicutes.c_Clostridia.o_Clostridiales.f_Clostridiales_Family_XI.g_Clostridiales_Family_XI_unculture                                                  | 0           | -   |           |            |
| d_Bacteria.p_Firmicutes.c_Clostridia.o_Clostridiales.f_Syntrophomonadaceae.g_Pelospora                                                                              | 0           | -   |           |            |
| d_Bacteria.p_Firmicutes.c_Clostridia.o_Clostridiales.f_Lachnospiraceae.g_Lachnoanaerobaculum                                                                        | 4.283216911 | CPR | 3.7627766 | 0.00060131 |
| d_Bacteria.p_Proteobacteria.c_Gammaproteobacteria.o_Vibrionales.f_Vibrionaceae.g_Photo bacterium                                                                    | 0           | -   |           |            |
| d_Bacteria.p_Bacteroidetes.c_Bacteroidia.o_Bacteroidales.f_Porphyromonadaceae.g_Paludibacter                                                                        | 1.873214883 | -   |           |            |
| d_Bacteria.p_Firmicutes.c_Clostridia.o_Clostridiales.f_Ruminococcaceae.g_Flavonifractor                                                                             | 0.011899223 | -   |           |            |
| d_Bacteria.p_Bacteroidetes.c_Bacteroidia.o_Bacteroidales.f_Rikenellaceae.g_Blvi28_wastewater_sludge_group                                                           | 0.498693361 | -   |           |            |
| d_Bacteria.p_Fusobacteria.c_Fusobacteriia.o_Fusobacteriales.f_Leptotrichiaceae.g_Leptotrichia                                                                       | 5.031168189 | CP  | 4.6351412 | 1.17E-07   |
| d_Bacteria.p_Proteobacteria.c_Betaproteobacteria.o_Rhodocyclales.f_Rhodocyclaceae.g_Methyloversatilis                                                               | 0.432434775 | -   |           |            |
| d_Bacteria.p_Candidate_division_TM7.c_Candidate_division_TM7_Unknown.o_Candidate_division_TM7_Unknown.f_Candidate_division_TM7_Unknown.g_Candidatus_Saccharimonas   | 2.848611912 | HC  | 2.4558676 | 4.31E-17   |
| d_Bacteria.p_Bacteroidetes.c_Flavobacteriia.o_Flavobacteriales.f_Flavobacteriaceae.g_Zobellia                                                                       | 0           | -   |           |            |
| d_Bacteria.p_Bacteroidetes.c_Cytophagia.o_Cytophagales.f_Cytophagaceae.g_Hymenobacter                                                                               | 0.714482171 | -   |           |            |
| d_Bacteria.p_Actinobacteria.c_Actinobacteria.o_Frankiales.f_Geodermatophilaceae.g_Modestobacter                                                                     | 0           | -   |           |            |
| d_Bacteria.p_Proteobacteria.c_Gammaproteobacteria.o_Enterobacteriales.f_Enterobacteriaceae.g_Serratia                                                               | 1.451684116 | -   |           |            |
| d_Bacteria.p_Actinobacteria.c_Actinobacteria.o_Coriobacteriales.f_Coriobacteriaceae.g_Atopobium                                                                     | 3.360969362 | HC  | 2.9427262 | 0.00045062 |
| d_Bacteria.p_Firmicutes.c_Bacilli.o_Lactobacillales.f_Carnobacteriaceae.g_Granulicatella                                                                            | 4.154824504 | -   |           |            |
| d_Bacteria.p_Proteobacteria.c_Betaproteobacteria.o_Burkholderiales.f_Comamonadaceae.g_Acidovorax                                                                    | 1.043755127 | -   |           |            |
| d_Bacteria.p_Firmicutes.c_Clostridia.o_Clostridiales.f_Lachnospiraceae.g_Johnsonella                                                                                | 3.155653429 | -   |           |            |
| d_Bacteria.p_Actinobacteria.c_Actinobacteria.o_Micrococcales.f_Microbacteriaceae.g_Salinibacterium                                                                  | 0.293730757 | -   |           |            |
| d_Bacteria.p_Tenericutes.c_Mollicutes.o_NB1_n.f_NB1_n_norank.g_NB1_n_norank                                                                                         | 0           | -   |           |            |
| d_Bacteria.p_Synergistetes.c_Synergistia.o_Synergistales.f_Synergistaceae.g_Synergistaceae_uncultured                                                               | 0.976451878 | -   |           |            |
| d_Bacteria.p_Actinobacteria.c_Actinobacteria.o_Micrococcales.f_Micrococcaceae.g_Nesterenkonia                                                                       | 1.526166904 | -   |           |            |
| d_Bacteria.p_Plantomycetes.c_Phycisphaerae.o_Phycisphaerales.f_Phycisphaeraceae.g_SM1A02                                                                            | 0           | -   |           |            |
| d_Bacteria.p_Firmicutes.c_Clostridia.o_Clostridiales.f_Peptococcaceae.g_Peptococcus                                                                                 | 2.035065703 | -   |           | 0.0001925  |
| d_Bacteria.p_Proteobacteria.c_Gammaproteobacteria.o_Pseudomonadales.f_Moraxellaceae.g_Moraxella                                                                     | 1.769032511 | -   |           |            |
| d_Bacteria.p_Candidate_division_WS6.c_Candidate_division_WS6_norank.o_Candidate_division_WS6_norank.f_Candidate_division_WS6_norank.g_Candidate_division_WS6_norank | 0           | -   |           |            |
| d_Bacteria.p_Firmicutes.c_Clostridia.o_Clostridiales.f_Lachnospiraceae.g_Dorea                                                                                      | 0           | -   |           |            |
| d_Bacteria.p_Proteobacteria.c_Deltaproteobacteria.o_Desulfobacterales.f_Desulfobulbaceae.g_Desulfobulbus                                                            | 0.496775943 | -   |           |            |
| d_Bacteria.p_Proteobacteria.c_Gammaproteobacteria.o_Enterobacteriales.f_Enterobacteriaceae.g_Cedecea                                                                | 1.484774219 | -   |           |            |
| d_Bacteria.p_Actinobacteria.c_Acidimicrobia.o_Acidimicrobiales.f_Iamiaceae.g_Iamia                                                                                  | 0           | -   |           |            |
| d_Bacteria.p_Candidate_division_SR1.c_Candidate_division_SR1_norank.o_Candidate_division_SR1_norank.f_Candidate_division_SR1_norank.g_Candidate_division_SR1_norank | 3.486178189 | HC  | 3.0803352 | 9.37E-15   |
| d_Bacteria.p_Actinobacteria.c_Actinobacteria.o_Coriobacteriales.f_Coriobacteriaceae.g_Adlercreutzia                                                                 | 0           | -   |           |            |
| d_Bacteria.p_Firmicutes.c_Bacilli.o_Bacillales.f_Bacillales_Family_XI.g_Gemella                                                                                     | 3.755330504 | HC  | 3.2762521 | 6.18E-06   |
| d_Bacteria.p_Firmicutes.c_Clostridia.o_Clostridiales.f_Ruminococcaceae.g_Ruminococcus                                                                               | 1.082186756 | -   |           |            |
| d_Bacteria.p_Firmicutes.c_Bacilli.o_Lactobacillales.f_Streptococcaceae.g_Lactococcus                                                                                | 0.151267675 | -   |           |            |
| d_Bacteria.p_Bacteroidetes.c_Flavobacteriia.o_Flavobacteriales.f_Flavobacteriaceae.g_Flavobacterium                                                                 | 0           | -   |           |            |
| d_Bacteria.p_Firmicutes.c_Clostridia.o_Clostridiales.f_Ruminococcaceae.g_Anaerofilum                                                                                | 0           | -   |           |            |
| d_Bacteria.p_Fusobacteria.c_Fusobacteriia.o_Fusobacteriales.f_Fusobacteriaceae.g_Fusobacterium                                                                      | 5.155842511 | CPR | 4.7384627 | 3.52E-11   |
| d_Bacteria.p_Spirochaetae.c_Spirochaetes.o_Spirochaetales.f_Spirochaetaceae.g_Spirochaeta                                                                           | 0           | -   |           |            |
| d_Bacteria.p_Actinobacteria.c_Actinobacteria.o_Coriobacteriales.f_Coriobacteriaceae.g_Cryptobacterium                                                               | 0.588084873 | -   |           |            |
| d_Bacteria.p_Proteobacteria.c_Gammaproteobacteria.o_Pasteurellales.f_Pasteurellaceae.g_Aggregatibacter                                                              | 2.156851901 | -   |           | 1.73E-12   |
| d_Bacteria.p_Proteobacteria.c_Gammaproteobacteria.o_Pseudomonadales.f_Moraxellaceae.g_Perlucidibaca                                                                 | 0           | -   |           |            |
| d_Bacteria.p_Cyanobacteria.c_Cyanobacteria.o_Cyanobacteria_norank.f_Cyanobacteria_norank.g_Cyanobacteria_norank                                                     | 2.324453944 | -   |           |            |
| d_Bacteria.p_Actinobacteria.c_Actinobacteria.o_Bifidobacteriales.f_Bifidobacteriaceae.g_Scardovia                                                                   | 1.820456895 | -   |           |            |
| d_Bacteria.p_Firmicutes.c_Negativicutes.o_Selenomonadales.f_Veillonellaceae.g_Mitsuokella                                                                           | 0           | -   |           |            |
| d_Bacteria.p_Bacteroidetes.c_Bacteroidia.o_Bacteroidales.f_Bacteroidaceae.g_Bacteroides                                                                             | 2.018769825 | -   |           |            |
| d_Bacteria.p_Actinobacteria.c_Actinobacteria.o_Bifidobacteriales.f_Bifidobacteriaceae.g_Alloscardovia                                                               | 1.750658362 | -   |           |            |
| d_Bacteria.p_Bacteroidetes.c_Sphingobacteriia.o_Sphingobacteriales.f_Sphingobacteriaceae.g_Sphingobacterium                                                         | 0           | -   |           |            |
| d_Bacteria.p_Proteobacteria.c_Alphaproteobacteria.o_Rhizobiales.f_Phyllobacteriaceae.g_Aquamicrobium                                                                | 1.176284236 | -   |           |            |
| d_Bacteria.p_Firmicutes.c_Clostridia.o_Clostridiales.f_Lachnospiraceae.g_Epulopiscium                                                                               | 0           | -   |           |            |

|                                                                                                                         |             |    |           |            |
|-------------------------------------------------------------------------------------------------------------------------|-------------|----|-----------|------------|
| d_Bacteria.p__Synergistetes.c__Synergistia.o__Synergistales.f__Synergistaceae.g__Pyramidobacter                         | 0.856158047 | -  |           |            |
| d_Bacteria.p__Firmicutes.c__Clostridia.o__Clostridiales.f__Lachnospiraceae.g__Anaerostipes                              | 1.167153171 | -  |           |            |
| d_Bacteria.p__Firmicutes.c__Clostridia.o__Clostridiales.f__Lachnospiraceae.g__Howardella                                | 0.877467333 | -  |           |            |
| d_Bacteria.p__Actinobacteria.c__Actinobacteria.o__Coriobacteriales.f__Coriobacteriaceae.g__Collinsella                  | 0.243038049 | -  |           |            |
| d_Bacteria.p__Proteobacteria.c__Deltaproteobacteria.o__Bdellovibrionales.f__Bacteriovoracaceae.g__Peredibacter          | 0           | -  |           |            |
| d_Bacteria.p__Bacteroidetes.c__Cytophagia.o__Cytophagales.f__Cytophagaceae.g__Spirosoma                                 | 0           | -  |           |            |
| d_Bacteria.p__Proteobacteria.c__Betaproteobacteria.o__Neisseriales.f__Neisseriaceae.g__Eikenella                        | 1.719008854 | -  |           |            |
| d_Bacteria.p__Proteobacteria.c__Betaproteobacteria.o__Burkholderiales.f__Oxalobacteraceae.g__Massilia                   | 0           | -  |           |            |
| d_Bacteria.p__Firmicutes.c__Negativicutes.o__Selenomonadales.f__Acidaminococcaceae.g__Phascolarctobacterium             | 0.802583704 | -  |           |            |
| d_Bacteria.p__Proteobacteria.c__Gammaproteobacteria.o__Aeromonadales.f__Succinivibrionaceae.g__Succinivibrio            | 0.044016829 | -  |           |            |
| d_Bacteria.p__Firmicutes.c__Clostridia.o__Clostridiales.f__Lachnospiraceae.g__Moryella                                  | 0.804480189 | -  |           |            |
| d_Bacteria.p__Bacteroidetes.c__Bacteroidia.o__Bacteroidales.f__Porphyromonadaceae.g__Odoribacter                        | 0           | -  |           |            |
| d_Bacteria.p__Firmicutes.c__Clostridia.o__Clostridiales.f__Ruminococcaceae.g__Faecalibacterium                          | 1.704093294 | -  |           |            |
| d_Bacteria.p__Actinobacteria.c__Actinobacteria.o__Micrococcales.f__Cellulomonadaceae.g__Cellulomonas                    | 0           | -  |           |            |
| d_Bacteria.p__Firmicutes.c__Bacilli.o__Lactobacillales.f__P5D1_392.g__P5D1_392_norank                                   | 2.926949497 | CP | 2.5494228 | 0.00113903 |
| d_Bacteria.p__Proteobacteria.c__Gammaproteobacteria.o__Pseudomonadales.f__Moraxellaceae.g__Enhydrobacter                | 0.076761772 | -  |           |            |
| d_Bacteria.p__Firmicutes.c__Negativicutes.o__Selenomonadales.f__Veillonellaceae.g__Megaspheara                          | 3.696567513 | CP | 3.320671  | 3.50E-10   |
| d_Bacteria.p__Proteobacteria.c__Alphaproteobacteria.o__Rhodobacterales.f__Rhodobacteraceae.g__Paracoccus                | 0.443002072 | -  |           |            |
| d_Bacteria.p__Bacteroidetes.c__Bacteroidia.o__Bacteroidales.f__Porphyromonadaceae.g__Tannerella                         | 3.076822423 | -  |           |            |
| d_Bacteria.p__Firmicutes.c__Clostridia.o__Clostridiales.f__Defluviitaleaceae.g__Defluviitaleaceae_uncultured            | 1.786609473 | -  |           |            |
| d_Bacteria.p__Bacteroidetes.c__Bacteroidia.o__Bacteroidales.f__Prevotellaceae.g__Prevotella                             | 5.327234816 | -  |           |            |
| d_Bacteria.p__Actinobacteria.c__Actinobacteria.o__Coriobacteriales.f__Coriobacteriaceae.g__Slackia                      | 0.922984816 | -  |           |            |
| d_Bacteria.p__Firmicutes.c__Bacilli.o__Lactobacillales.f__Lactobacillaceae.g__Lactobacillus                             | 2.68848508  | -  |           |            |
| d_Bacteria.p__Firmicutes.c__Clostridia.o__Clostridiales.f__Peptostreptococcaceae.g__Peptostreptococcus                  | 4.018730726 | HC | 3.5090324 | 2.36E-10   |
| d_Bacteria.p__Proteobacteria.c__Alphaproteobacteria.o__Rhizobiales.f__Bradyrhizobiaceae.g__Bradyrhizobium               | 0           | -  |           |            |
| d_Bacteria.p__Firmicutes.c__Clostridia.o__Clostridiales.f__Ruminococcaceae.g__Ruminococcaceae_Incertae_Sedis            | 0.640978057 | -  |           |            |
| d_Bacteria.p__Actinobacteria.c__Actinobacteria.o__Pseudonocardiales.f__Pseudonocardaceae.g__Actinomycetospira           | 0           | -  |           |            |
| d_Bacteria.p__Bacteroidetes.c__Bacteroidia.o__Bacteroidales.f__S24_7.g__S24_7_norank                                    | 0.291886616 | -  |           |            |
| d_Bacteria.p__Actinobacteria.c__Actinobacteria.o__Micrococcales.f__Micrococcaceae.g__Rothia                             | 4.779023065 | HC | 4.2314831 | 0.00040155 |
| d_Bacteria.p__Proteobacteria.c__Alphaproteobacteria.o__Caulobacterales.f__Hyphomonadaceae.g__Hyphomonadaceae_norank     | 2.101747074 | -  |           |            |
| d_Bacteria.p__Proteobacteria.c__Betaproteobacteria.o__Burkholderiales.f__Alcaligenaceae.g__Achromobacter                | 0.609238576 | -  |           |            |
| d_Bacteria.p__Bacteroidetes.c__Bacteroidia.o__Bacteroidales.f__BS11_gut_group.g__BS11_gut_group_norank                  | 0           | -  |           |            |
| d_Bacteria.p__Bacteroidetes.c__Sphingobacteriia.o__Sphingobacteriales.f__Saprospiraceae.g__Lewinella                    | 0           | -  |           |            |
| d_Bacteria.p__Firmicutes.c__Clostridia.o__Clostridiales.f__Lachnospiraceae.g__Shuttleworthia                            | 2.199686628 | -  |           |            |
| d_Bacteria.p__Actinobacteria.c__Actinobacteria.o__Coriobacteriales.f__Coriobacteriaceae.g__Coriobacteriaceae_uncultured | 0.005990364 | -  |           |            |
| d_Bacteria.p__Actinobacteria.c__Actinobacteria.o__Corynebacteriales.f__Nocardiaceae.g__Rhodococcus                      | 1.781611782 | -  |           |            |
| d_Bacteria.p__Firmicutes.c__Clostridia.o__Clostridiales.f__Ruminococcaceae.g__Anaerotruncus                             | 0.059437188 | -  |           |            |
| d_Bacteria.p__Firmicutes.c__Clostridia.o__Clostridiales.f__Clostridiales_Family_XIII.g__Mogibacterium                   | 1.771538488 | -  |           | 1.70E-07   |
| d_Bacteria.p__Firmicutes.c__Clostridia.o__Clostridiales.f__Ruminococcaceae.g__Intestinimonas                            | 0           | -  |           |            |
| d_Bacteria.p__Actinobacteria.c__Actinobacteria.o__Actinomycetales.f__Actinomycetaceae.g__Actinomyces                    | 4.774478847 | CP | 4.4208261 | 2.54E-09   |
| d_Bacteria.p__Actinobacteria.c__Actinobacteria.o__Micrococcales.f__Micrococcaceae.g__Arthrobacter                       | 0           | -  |           |            |
| d_Bacteria.p__Firmicutes.c__Bacilli.o__Lactobacillales.f__16d63_751.g__16d63_751_norank                                 | 2.830116198 | CP | 2.4377312 | 6.23E-05   |
| d_Bacteria.p__Proteobacteria.c__Alphaproteobacteria.o__Rhizobiales.f__Bradyrhizobiaceae.g__Bosea                        | 0           | -  |           |            |
| d_Bacteria.p__Firmicutes.c__Erysipelotrichia.o__Erysipelotrichales.f__Erysipelotrichaceae.g__Bulleidia                  | 0.7747602   | -  |           |            |
| d_Bacteria.p__Firmicutes.c__Bacilli.o__Bacillales.f__Staphylococcaceae.g__Staphylococcus                                | 0.618338692 | -  |           |            |
| d_Bacteria.p__Firmicutes.c__Bacilli.o__Bacillales.f__Bacillales_Family_XII.g__Exiguobacterium                           | 0.388180171 | -  |           |            |

Table S21. The detailed values of gut microbial diversity index and observed OTUs in the discovery cohort (48 healthy controls and 24 CP).

| sample | reads | label | ace        | chao      | shannon  | simpson  | coverage | observed_otus |
|--------|-------|-------|------------|-----------|----------|----------|----------|---------------|
| CP02   | 31810 | 0.97  | 83.578685  | 80.6      | 1.265948 | 0.413904 | 0.999466 | 67            |
| CP34   | 41577 | 0.97  | 251.177689 | 273.5     | 3.062047 | 0.092475 | 0.998966 | 209           |
| CP33   | 20422 | 0.97  | 246.425096 | 240.16129 | 3.55354  | 0.051729 | 0.998041 | 215           |
| CP30   | 42015 | 0.97  | 108.728746 | 104.4     | 1.558696 | 0.35855  | 0.999476 | 89            |
| CP29   | 61483 | 0.97  | 193.431115 | 197.55556 | 2.181263 | 0.203754 | 0.999528 | 175           |
| CP28   | 61416 | 0.97  | 187.714695 | 199       | 1.82492  | 0.238741 | 0.999398 | 162           |
| CP27   | 49652 | 0.97  | 305.964285 | 320.95652 | 3.061361 | 0.100055 | 0.998872 | 254           |
| CP26   | 42209 | 0.97  | 334.330974 | 340.03448 | 3.482477 | 0.070752 | 0.99865  | 285           |
| CP24   | 30330 | 0.97  | 75.209466  | 70        | 0.140884 | 0.962296 | 0.999472 | 40            |
| CP22   | 56644 | 0.97  | 361.487457 | 281       | 2.704022 | 0.118824 | 0.99887  | 197           |
| CP19   | 44382 | 0.97  | 136.666956 | 138.76923 | 1.491432 | 0.311645 | 0.999302 | 103           |
| CP18   | 33324 | 0.97  | 130.035087 | 119.45455 | 1.349886 | 0.479352 | 0.99913  | 101           |
| CP36   | 45876 | 0.97  | 311.394151 | 309.0625  | 3.603732 | 0.055046 | 0.998845 | 266           |
| CP15   | 50283 | 0.97  | 82.353912  | 71        | 1.990948 | 0.252428 | 0.999741 | 58            |
| CP14   | 43254 | 0.97  | 291.209212 | 298.04167 | 3.404199 | 0.062521 | 0.998913 | 253           |
| CP13   | 28076 | 0.97  | 149.90407  | 150.07143 | 1.9271   | 0.282673 | 0.999038 | 125           |
| CP12   | 33271 | 0.97  | 273.909026 | 207.47619 | 1.3312   | 0.51739  | 0.998587 | 156           |
| CP11   | 31236 | 0.97  | 106.636878 | 101.5     | 0.634887 | 0.765471 | 0.999296 | 85            |
| CP10   | 35119 | 0.97  | 220.475    | 212.46429 | 2.859708 | 0.108386 | 0.998889 | 186           |
| CP07   | 51571 | 0.97  | 95.709904  | 89.230769 | 1.829343 | 0.298104 | 0.99969  | 80            |
| CP05   | 40549 | 0.97  | 133.67223  | 135.46154 | 0.668026 | 0.784253 | 0.99926  | 102           |
| CP04   | 57604 | 0.97  | 235.515699 | 202       | 1.099829 | 0.641076 | 0.999375 | 112           |
| CP03   | 27480 | 0.97  | 92.349466  | 98.5      | 0.76672  | 0.714889 | 0.999127 | 64            |
| CP17   | 42280 | 0.97  | 158.205636 | 176       | 0.570417 | 0.817909 | 0.99929  | 89            |
| HC49   | 34415 | 0.97  | 458.843742 | 443.32308 | 3.649536 | 0.063967 | 0.997908 | 404           |
| HC48   | 38077 | 0.97  | 224.490854 | 219.75    | 2.70663  | 0.108204 | 0.998897 | 189           |
| HC47   | 27320 | 0.97  | 494.229207 | 483.52459 | 4.225479 | 0.03128  | 0.996889 | 425           |
| HC37   | 48295 | 0.97  | 400.421412 | 412.18182 | 3.624674 | 0.060344 | 0.998551 | 339           |
| HC41   | 30428 | 0.97  | 527.636661 | 524.19608 | 3.709752 | 0.071073 | 0.996484 | 413           |
| HC40   | 8033  | 0.97  | 324.560805 | 306.48837 | 2.5033   | 0.194746 | 0.990041 | 233           |
| HC38   | 30889 | 0.97  | 539.096702 | 526.28125 | 3.131462 | 0.143928 | 0.996504 | 436           |
| HC51   | 19480 | 0.97  | 431.23625  | 448.88571 | 2.876104 | 0.204435 | 0.995175 | 324           |
| HC46   | 48581 | 0.97  | 360.293984 | 370.10345 | 3.225528 | 0.097792 | 0.998744 | 307           |
| HC52   | 58951 | 0.97  | 502.221417 | 496.75    | 3.517711 | 0.081796 | 0.998507 | 417           |
| HC62   | 28400 | 0.97  | 715.825163 | 668.71429 | 4.59394  | 0.021266 | 0.995458 | 595           |
| HC55   | 39344 | 0.97  | 316.951839 | 350.31579 | 3.193653 | 0.102837 | 0.99845  | 254           |
| HC56   | 32701 | 0.97  | 473.857231 | 456.76667 | 3.882773 | 0.044683 | 0.997645 | 408           |
| HC58   | 20528 | 0.97  | 588.686109 | 528.9     | 4.006054 | 0.042736 | 0.994641 | 409           |
| HC60   | 27690 | 0.97  | 568.028435 | 559.17544 | 4.236414 | 0.033864 | 0.996027 | 454           |
| HC63   | 33145 | 0.97  | 323.225233 | 321.52941 | 3.383005 | 0.081377 | 0.998401 | 281           |
| HC64   | 20375 | 0.97  | 417.67523  | 448.66667 | 3.524135 | 0.074812 | 0.995632 | 330           |
| HC65   | 30941 | 0.97  | 461.819347 | 455.45652 | 3.821259 | 0.053192 | 0.997221 | 376           |
| HC67   | 16960 | 0.97  | 465.98105  | 456.24528 | 3.486675 | 0.094505 | 0.994399 | 372           |
| HC68   | 26650 | 0.97  | 463.509257 | 466.32609 | 3.420466 | 0.09472  | 0.996323 | 363           |
| HC36   | 29266 | 0.97  | 423.306157 | 413.22    | 4.06162  | 0.034299 | 0.997711 | 369           |
| HC54   | 38305 | 0.97  | 592.884815 | 594.28125 | 3.921788 | 0.049251 | 0.997181 | 504           |
| HC35   | 19209 | 0.97  | 491.046754 | 456.9403  | 3.688085 | 0.063384 | 0.994586 | 377           |
| HC17   | 40105 | 0.97  | 460.418069 | 456.625   | 3.885085 | 0.043591 | 0.997905 | 384           |
| HC32   | 21079 | 0.97  | 410.122654 | 365.12121 | 1.920792 | 0.431204 | 0.996062 | 262           |
| HC01   | 28843 | 0.97  | 314.942093 | 304.775   | 2.982648 | 0.158327 | 0.998128 | 269           |
| HC03   | 17808 | 0.97  | 344.701175 | 354.83333 | 3.543382 | 0.068325 | 0.996013 | 272           |
| HC04   | 53199 | 0.97  | 203.325936 | 198.75    | 2.465395 | 0.154366 | 0.999342 | 169           |
| HC05   | 18887 | 0.97  | 249.417898 | 200.4     | 1.979459 | 0.237026 | 0.997406 | 122           |
| HC06   | 56364 | 0.97  | 607.884619 | 623.375   | 3.185692 | 0.148643 | 0.997924 | 482           |
| HC08   | 19588 | 0.97  | 550.044933 | 565.5     | 4.36068  | 0.024168 | 0.994027 | 435           |
| HC09   | 21164 | 0.97  | 414.955238 | 418.21622 | 3.504463 | 0.102895 | 0.996031 | 324           |

|      |       |      |            |           |          |          |          |     |
|------|-------|------|------------|-----------|----------|----------|----------|-----|
| HC11 | 30464 | 0.97 | 377.51361  | 383.27027 | 2.952224 | 0.163657 | 0.997702 | 318 |
| HC13 | 22885 | 0.97 | 511.349824 | 552.08108 | 3.86715  | 0.052113 | 0.995237 | 393 |
| HC15 | 28032 | 0.97 | 380.151853 | 396.55172 | 3.453789 | 0.086096 | 0.997217 | 293 |
| HC16 | 22164 | 0.97 | 440.473132 | 446.5122  | 3.844077 | 0.049455 | 0.995984 | 351 |
| HC69 | 31277 | 0.97 | 568.900106 | 555.2381  | 3.898989 | 0.04539  | 0.996355 | 453 |
| HC22 | 26985 | 0.97 | 309.814028 | 296.48649 | 2.959706 | 0.134562 | 0.997628 | 242 |
| HC23 | 24902 | 0.97 | 512.889789 | 504.75    | 3.264869 | 0.150824 | 0.995743 | 412 |
| HC24 | 19812 | 0.97 | 548.178043 | 545.77586 | 4.247217 | 0.037325 | 0.994599 | 448 |
| HC26 | 27004 | 0.97 | 217.385056 | 217.66667 | 2.194253 | 0.188759 | 0.998445 | 122 |
| HC27 | 53068 | 0.97 | 733.933116 | 700       | 4.319796 | 0.03624  | 0.997739 | 630 |
| HC28 | 28427 | 0.97 | 387.369516 | 393.17143 | 3.360667 | 0.120247 | 0.997643 | 330 |
| HC29 | 28440 | 0.97 | 309.487959 | 331.3913  | 3.306892 | 0.081901 | 0.997996 | 262 |
| HC30 | 37395 | 0.97 | 494.397652 | 489.81818 | 3.731413 | 0.059769 | 0.997593 | 417 |
| HC31 | 18518 | 0.97 | 383.893634 | 388.77778 | 3.827242 | 0.04248  | 0.99568  | 301 |
| HC34 | 31257 | 0.97 | 286.025961 | 288.21429 | 3.041132 | 0.130429 | 0.998304 | 239 |
| HC71 | 22490 | 0.97 | 500.511174 | 484.94286 | 4.081269 | 0.041248 | 0.996043 | 429 |

Table S22. The abundance and composition at the genus level of each sample in the discovery cohort (48 healthy controls and 24 CP).

| ID                                   | observed OTUs in the discovery cohort (48 healthy controls and 24 CP) at the genus level |          |          |          |          |          |          |          |          |          |          |          |
|--------------------------------------|------------------------------------------------------------------------------------------|----------|----------|----------|----------|----------|----------|----------|----------|----------|----------|----------|
|                                      | CP26                                                                                     | CP36     | CP34     | CP33     | CP10     | CP07     | CP18     | CP27     | CP14     | CP22     | CP12     | CP13     |
| Bacteroides                          | 0.682616                                                                                 | 0.509769 | 0.444679 | 0.285271 | 0.204288 | 0.17627  | 0.124515 | 0.095345 | 0.090888 | 0.074621 | 0.07197  | 0.02611  |
| Faecalibacterium                     | 0.029751                                                                                 | 0.00706  | 0        | 0        | 0.160709 | 0        | 0        | 0.247591 | 7.10E-05 | 0.207852 | 0        | 0        |
| Lachnospiraceae_incertae_sedis       | 0.038401                                                                                 | 0.095929 | 0.241774 | 0.154167 | 0.157125 | 4.30E-05 | 1.68E-04 | 0.248093 | 0.099803 | 0.007684 | 0.01629  | 0.048967 |
| Subdoligranulum                      | 0.070101                                                                                 | 0.028166 | 1.90E-05 | 0.075779 | 0.001298 | 0        | 0.752591 | 0.112884 | 0.164986 | 0.193343 | 0.724255 | 0.451542 |
| Escherichia-Shigella                 | 2.99E-04                                                                                 | 0.04256  | 0.063505 | 0.045778 | 0.259926 | 0.519029 | 0.00568  | 6.50E-05 | 0        | 1.71E-04 | 0.00215  | 0.299764 |
| Blautia                              | 0.01949                                                                                  | 0.035103 | 0.035828 | 0.012345 | 0.007222 | 0.157175 | 6.40E-05 | 0.016554 | 0.060106 | 0.013088 | 7.33E-04 | 0.058438 |
| Prevotella                           | 0                                                                                        | 2.50E-05 | 0.034816 | 6.60E-05 | 0.001774 | 1.70E-05 | 0.001237 | 0.032454 | 0        | 0.337187 | 3.25E-04 | 0        |
| Akkermansia                          | 7.30E-05                                                                                 | 0        | 0        | 0.030865 | 0        | 4.00E-05 | 3.00E-05 | 0.0132   | 2.46E-04 | 0        | 0.001546 | 8.00E-05 |
| Streptococcus                        | 1.50E-05                                                                                 | 0.0057   | 0.001962 | 0.04978  | 6.50E-05 | 1.43E-04 | 0.037628 | 2.17E-04 | 0.016814 | 1.01E-04 | 0.001775 | 4.37E-04 |
| Ruminococcaceae_uncultured           | 0.017633                                                                                 | 0.009179 | 9.90E-05 | 0.028604 | 3.48E-04 | 7.48E-04 | 2.50E-04 | 0.00534  | 0.010897 | 0.002026 | 0.003309 | 0.056959 |
| Pseudobutyrvibrio                    | 0.04696                                                                                  | 0.024686 | 0        | 4.58E-04 | 3.40E-05 | 0        | 0        | 0.045912 | 0.102789 | 0.005333 | 6.90E-05 | 0        |
| Megamonas                            | 0.008086                                                                                 | 0        | 0        | 0.002692 | 2.47E-04 | 0        | 0        | 2.50E-05 | 2.00E-05 | 0.077925 | 3.66E-04 | 0        |
| Roseburia                            | 0.023838                                                                                 | 0.043703 | 2.80E-05 | 0.008035 | 4.30E-05 | 0        | 0        | 0.002448 | 0.054    | 0.00209  | 2.11E-04 | 0        |
| Lachnospiraceae_unclassified         | 0.011765                                                                                 | 0.023715 | 0.020252 | 0.004627 | 0.003985 | 0.008526 | 0        | 0.011644 | 0.031857 | 0.004087 | 2.86E-04 | 0.00152  |
| Bifidobacterium                      | 0                                                                                        | 0        | 2.50E-05 | 0        | 0.034569 | 0        | 0        | 3.30E-05 | 0.014378 | 0        | 5.70E-05 | 5.16E-04 |
| Enterococcus                         | 0                                                                                        | 0        | 0        | 0        | 0.004073 | 0        | 0        | 0        | 0        | 1.00E-05 | 0.002795 | 0        |
| Alistipes                            | 0.003788                                                                                 | 0.004553 | 3.22E-04 | 0.037364 | 0.0041   | 1.60E-05 | 1.79E-04 | 0.011872 | 5.00E-04 | 0        | 0.002405 | 0.004967 |
| Lachnospira                          | 0                                                                                        | 0        | 0        | 5.90E-05 | 0        | 0        | 1.65E-04 | 0        | 0.006544 | 0        | 2.40E-05 | 0        |
| Ruminococcus                         | 0.00762                                                                                  | 0.026976 | 0        | 0        | 4.20E-04 | 0        | 0        | 0        | 0        | 1.60E-05 | 5.80E-05 | 0.015442 |
| Ruminococcaceae_unclassified         | 0.003968                                                                                 | 9.15E-04 | 3.30E-04 | 0        | 0.073988 | 0        | 0        | 0.069114 | 4.12E-04 | 0.037648 | 0        | 3.83E-04 |
| Actinomyces                          | 7.10E-05                                                                                 | 0        | 0.001392 | 1.29E-04 | 0        | 2.04E-04 | 9.40E-05 | 5.86E-04 | 3.41E-04 | 0        | 0.001404 | 0        |
| Anaerostipes                         | 0.002554                                                                                 | 0.021802 | 5.55E-04 | 0        | 0        | 3.50E-05 | 2.60E-05 | 0.015729 | 0.194253 | 5.00E-05 | 6.80E-05 | 3.30E-05 |
| Lachnospiraceae_uncultured           | 0.004723                                                                                 | 0.01638  | 0.006274 | 1.73E-04 | 0.006017 | 0        | 0        | 0.001821 | 0.00891  | 0.001022 | 3.80E-05 | 0        |
| Clostridium_sensu_stricto_1          | 0                                                                                        | 0        | 0        | 0        | 0        | 0        | 9.60E-05 | 8.90E-05 | 2.20E-05 | 0        | 0        | 0        |
| Rothia                               | 2.10E-05                                                                                 | 0.001979 | 1.26E-04 | 6.00E-05 | 0        | 2.00E-05 | 0.001875 | 5.00E-05 | 7.16E-04 | 2.40E-05 | 3.70E-05 | 1.74E-04 |
| Phascolarctobacterium                | 0.001907                                                                                 | 0.010815 | 0.011383 | 0.061765 | 0.000649 | 0.002754 | 0.002223 | 0.004972 | 4.37E-04 | 1.90E-05 | 0.002065 | 2.27E-04 |
| Megasphaera                          | 0                                                                                        | 0        | 0        | 0.001431 | 4.70E-05 | 0        | 0        | 0        | 0        | 0        | 1.83E-04 | 0        |
| Coprococcus                          | 0.001187                                                                                 | 0.003278 | 0.05121  | 4.80E-05 | 0.002225 | 0        | 0        | 5.39E-04 | 0.0115   | 3.60E-05 | 2.73E-04 | 0.00598  |
| Erysipelotrichaceae_incertae_sedis   | 6.24E-04                                                                                 | 0.002901 | 0.004356 | 9.80E-05 | 0.002725 | 5.75E-04 | 0.060535 | 0.005311 | 0.030212 | 9.72E-04 | 0.143829 | 0.004406 |
| Peptostreptococcaceae_incertae_sedis | 5.29E-04                                                                                 | 0        | 0.041112 | 4.80E-05 | 0.004274 | 0.001897 | 0        | 1.65E-04 | 0.0028   | 0.005466 | 0        | 0.001993 |
| Dialister                            | 0                                                                                        | 0        | 0        | 6.69E-04 | 0.00206  | 0        | 0        | 9.50E-05 | 6.70E-05 | 1.30E-05 | 2.60E-05 | 0        |
| Ruminococcaceae_incertae_sedis       | 0.010682                                                                                 | 0.004217 | 0.013354 | 0.001773 | 0.00299  | 0        | 1.62E-04 | 0.022529 | 0.060335 | 1.20E-04 | 0.005822 | 7.45E-04 |
| Parabacteroides                      | 0                                                                                        | 0.004752 | 0.004017 | 0.013724 | 0.008075 | 0        | 0.002359 | 9.32E-04 | 0.001205 | 0.003409 | 0.001058 | 4.92E-04 |
| Veillonella                          | 8.41E-04                                                                                 | 0.002934 | 2.10E-04 | 0.003477 | 5.25E-04 | 0.015623 | 2.80E-05 | 0.001801 | 0.001908 | 4.12E-04 | 1.65E-04 | 0        |
| Asteroleplasma                       | 0                                                                                        | 0        | 0        | 0        | 0        | 0        | 0        | 0        | 0        | 0        | 0        | 0        |
| Parasutterella                       | 0                                                                                        | 0        | 0        | 9.69E-04 | 0.028392 | 0        | 0        | 0        | 0        | 0        | 2.40E-05 | 7.57E-04 |
| Lactobacillus                        | 0                                                                                        | 0.02609  | 0        | 0        | 0        | 0.102609 | 0.003036 | 0        | 0        | 3.20E-05 | 6.70E-05 | 0        |
| Dorea                                | 0.002267                                                                                 | 0.006061 | 0.004398 | 0        | 1.09E-04 | 0        | 9.11E-04 | 0.003056 | 0.007926 | 0        | 0        | 0        |
| Halomonas                            | 7.41E-04                                                                                 | 0.003695 | 7.02E-04 | 2.73E-04 | 0.001077 | 0.002362 | 0.002864 | 0.007827 | 4.17E-04 | 0.006131 | 0.004927 | 0.001096 |
| Klebsiella                           | 0                                                                                        | 0        | 0        | 0        | 0        | 0        | 0        | 0        | 0        | 0        | 0        | 1.40E-04 |
| Erysipelotrichaceae_uncultured       | 5.50E-05                                                                                 | 0.003063 | 0        | 4.60E-05 | 0.005369 | 0        | 0        | 0        | 0        | 0        | 4.06E-04 | 0        |
| Acidaminococcus                      | 0                                                                                        | 0        | 2.20E-05 | 0.080386 | 0        | 0        | 0        | 0        | 0        | 0        | 0.002311 | 0        |
| S24-7_norank                         | 0                                                                                        | 0        | 0        | 0.040823 | 0        | 0        | 4.80E-05 | 0        | 0        | 0        | 0.001877 | 0        |
| Raoultella                           | 0                                                                                        | 0        | 0        | 4.50E-05 | 0.002766 | 4.60E-05 | 0        | 0        | 0        | 0        | 0        | 3.40E-05 |
| Christensenellaceae_uncultured       | 0                                                                                        | 0        | 0        | 0        | 0        | 0        | 0        | 0        | 0        | 0        | 0        | 0        |
| Sutterella                           | 0                                                                                        | 0        | 0        | 0.003226 | 0        | 1.47E-04 | 0        | 0        | 4.30E-05 | 9.38E-04 | 9.10E-05 | 0        |
| Firmicutes_unclassified              | 7.00E-05                                                                                 | 2.00E-05 | 1.15E-04 | 5.20E-05 | 0        | 0.003986 | 0        | 0        | 1.08E-04 | 0.001174 | 0        | 0        |
| Barnesiella                          | 0                                                                                        | 0        | 0        | 0        | 4.12E-04 | 0        | 0        | 0        | 0        | 0        | 0        | 0.004572 |
| Enterobacteriaceae_unclassified      | 0                                                                                        | 0        | 0        | 0        | 0        | 1.89E-04 | 0        | 0        | 0        | 0        | 0        | 3.35E-04 |
| Paraprevotella                       | 0                                                                                        | 0.025231 | 0.00462  | 0        | 3.40E-05 | 0        | 5.70E-05 | 0.005636 | 0        | 0.011231 | 0        | 0        |
| Defluviitaleaceae_incertae_sedis     | 0                                                                                        | 0        | 9.20E-05 | 3.12E-04 | 0        | 0        | 0        | 0        | 0        | 0        | 2.60E-05 | 0        |
| Anaerotruncus                        | 0.001093                                                                                 | 2.02E-04 | 6.57E-04 | 0.01303  | 1.41E-04 | 0        | 0        | 0.001231 | 0.002096 | 1.22E-04 | 5.63E-04 | 1.83E-04 |
| Desulfovibrio                        | 0                                                                                        | 0        | 0        | 0.009358 | 8.30E-05 | 0        | 0        | 0        | 0        | 8.91E-04 | 4.46E-04 | 0        |
| Peptostreptococcus                   | 0                                                                                        | 0        | 0        | 0        | 0        | 0        | 8.40E-05 | 2.00E-05 | 3.43E-04 | 1.90E-05 | 0        | 0        |
| Flavonifractor                       | 2.59E-04                                                                                 | 0.001749 | 9.06E-04 | 0.003602 | 0.011476 | 0        | 0        | 0        | 0.01153  | 5.78E-04 | 2.64E-04 | 0.003656 |
| Bacteroidales_unclassified           | 2.00E-05                                                                                 | 3.40E-05 | 0.001991 | 3.51E-04 | 0        | 0        | 0        | 0        | 0        | 4.90E-05 | 0        | 0        |
| Atopobium                            | 0                                                                                        | 0        | 5.00E-05 | 1.40E-04 | 0        | 0        | 5.90E-05 | 6.20E-05 | 1.14E-04 | 0        | 0        | 3.70E-05 |
| Haemophilus                          | 2.51E-04                                                                                 | 3.60E-05 | 0        | 7.89E-04 | 0        | 0        | 6.70E-05 | 0.002633 | 1.67E-04 | 4.10E-05 | 3.30E-05 | 0        |
| RC9_gut_group                        | 0                                                                                        | 0        | 0        | 0        | 0        | 0        | 0        | 0        | 0        | 0        | 0        | 0        |
| Odoribacter                          | 8.21E-04                                                                                 | 0        | 2.40E-05 | 0        | 0        | 0        | 0        | 1.05E-04 | 0        | 0        | 0        | 4.23E-04 |
| Alloprevotella                       | 0                                                                                        | 0        | 0        | 0        | 0        | 0        | 0        | 0        | 0        | 0        | 0        | 0        |
| Granulicatella                       | 0                                                                                        | 1.51E-04 | 1.90E-05 | 1.31E-04 | 0        | 1.09E-04 | 3.80E-05 | 0        | 1.57E-04 | 1.80E-05 | 0        | 0        |
| Solobacterium                        | 7.00E-05                                                                                 | 0        | 2.50E-05 | 5.90E-05 | 0        | 1.40E-04 | 2.50E-05 | 1.67E-04 | 4.87E-04 | 4.10E-05 | 0        | 0        |
| Candidate_division_TM7_norank        | 8.10E-05                                                                                 | 3.09E-04 | 6.10E-05 | 4.61E-04 | 0        | 3.83E-04 | 0        | 0.002846 | 3.53E-04 | 1.37E-04 | 0        | 2.80E-05 |
| Pelagibacterium                      | 4.90E-05                                                                                 | 4.04E-04 | 4.00E-05 | 0        | 1.58E-04 | 2.14E-04 | 3.63E-04 | 9.99E-04 | 5.00E-05 | 4.09E-04 | 5.17E-04 | 3.30E-05 |
| Eubacterium                          | 0                                                                                        | 0        | 0        | 1.04E-04 | 0        | 0        | 0        | 0        | 0        | 0        | 0        | 0        |
| Others                               | 0.00668                                                                                  | 0.005858 | 0.00865  | 0.026558 | 0.006182 | 0.0067   | 0.002543 | 0.008008 | 0.009192 | 0.003464 | 0.004856 | 0.009531 |

| CP19     | CP29     | CP04     | CP28     | CP05     | CP30     | CP11     | CP03     | CP24     | CP17     | CP15     | CP02     | HC26     | HC37     | HC31     |
|----------|----------|----------|----------|----------|----------|----------|----------|----------|----------|----------|----------|----------|----------|----------|
| 0.017147 | 0.011443 | 0.009953 | 0.006396 | 0.0048   | 0.003529 | 0.001129 | 5.85E-04 | 4.05E-04 | 2.52E-04 | 1.65E-04 | 5.80E-05 | 0.719231 | 0.690799 | 0.651071 |
| 1.63E-04 | 6.96E-04 | 7.10E-05 | 4.33E-04 | 0.027652 | 2.70E-05 | 8.42E-04 | 6.60E-05 | 0        | 0        | 0        | 7.20E-05 | 0.057329 | 0.115582 | 0.028075 |
| 0.007431 | 0.003287 | 0.012717 | 7.78E-04 | 0.029449 | 1.56E-04 | 0.002978 | 5.07E-04 | 2.60E-05 | 0.022439 | 0.645654 | 9.40E-05 | 0.054945 | 0.042348 | 0.054848 |
| 0.249012 | 0.002223 | 0.868017 | 0.001062 | 0.912966 | 3.40E-04 | 0.066395 | 4.23E-04 | 0        | 0.003252 | 1.57E-04 | 8.26E-04 | 3.12E-04 | 0.001537 | 0.005041 |
| 0.452086 | 0.001051 | 1.40E-05 | 7.19E-04 | 2.60E-05 | 1.29E-04 | 0.006071 | 0.84173  | 8.10E-05 | 0.003804 | 0        | 0.004225 | 0.009587 | 0.001905 | 5.18E-04 |
| 0.004216 | 0.001801 | 0.036967 | 2.95E-04 | 0.001645 | 2.60E-05 | 0.007445 | 8.10E-05 | 0        | 0.037504 | 3.70E-05 | 3.20E-04 | 0.033946 | 0.009942 | 0.079451 |
| 0        | 5.24E-04 | 0        | 0.00109  | 0        | 7.96E-04 | 3.90E-05 | 3.00E-05 | 3.90E-05 | 0.002011 | 0        | 0        | 3.70E-05 | 1.23E-04 | 1.52E-04 |
| 0.232865 | 9.90E-05 | 0.011438 | 2.43E-04 | 0        | 9.60E-05 | 0.872441 | 0.005753 | 0        | 0.902936 | 4.50E-05 | 0        | 0        | 7.61E-04 | 0        |
| 0.001638 | 0.358477 | 0.002478 | 0.474184 | 2.09E-04 | 0.629972 | 0        | 0.008794 | 0.002909 | 0.002704 | 0.06172  | 0.350965 | 3.90E-05 | 4.13E-04 | 1.39E-04 |
| 0.002352 | 5.87E-04 | 3.69E-04 | 1.89E-04 | 9.96E-04 | 2.50E-05 | 0.001062 | 0.028812 | 0        | 1.13E-04 | 0        | 3.60E-05 | 6.10E-05 | 0.004818 | 0.008434 |
| 2.30E-05 | 4.42E-04 | 1.50E-05 | 1.52E-04 | 9.78E-04 | 0        | 0        | 0        | 3.20E-05 | 2.00E-05 | 2.50E-05 | 1.85E-04 | 0.006046 | 0.017568 | 0.012051 |
| 0        | 3.40E-05 | 0        | 3.17E-04 | 5.30E-05 | 3.32E-04 | 0        | 0        | 0.008492 | 0        | 2.00E-05 | 8.70E-05 | 4.80E-05 | 0        | 0        |
| 0        | 9.53E-04 | 0        | 4.23E-04 | 0.001058 | 2.39E-04 | 5.14E-04 | 0        | 0        | 3.16E-04 | 2.30E-05 | 3.00E-05 | 0.012865 | 0.003251 | 0.023054 |
| 2.28E-04 | 3.87E-04 | 0.001976 | 2.12E-04 | 0.001523 | 0        | 0.03087  | 0        | 0        | 0.001389 | 0.001423 | 2.90E-05 | 0.003317 | 0.012276 | 0.010791 |
| 6.67E-04 | 1.50E-04 | 2.10E-05 | 1.67E-04 | 0        | 4.90E-05 | 2.70E-05 | 3.00E-05 | 0        | 0        | 0        | 0.570098 | 0.005508 | 0        | 0.001626 |
| 0        | 1.13E-04 | 0.016988 | 1.09E-04 | 0.005933 | 0        | 3.10E-05 | 1.15E-04 | 0.981168 | 2.00E-05 | 0        | 0.006692 | 8.61E-04 | 0        | 0        |
| 6.50E-05 | 3.64E-04 | 4.60E-05 | 1.89E-04 | 4.70E-05 | 0        | 0        | 1.47E-04 | 0        | 0        | 0        | 0        | 0        | 0.006055 | 0.014791 |
| 0        | 0        | 0        | 0        | 0        | 0        | 0        | 0        | 0        | 0        | 0        | 1.23E-04 | 1.22E-04 | 0        | 0.002257 |
| 0.001592 | 3.72E-04 | 2.40E-05 | 7.90E-05 | 3.10E-05 | 0        | 0.00324  | 0        | 0        | 0        | 0        | 0        | 0        | 1.40E-05 | 0.007501 |
| 4.80E-05 | 4.80E-05 | 0        | 8.40E-05 | 0.004964 | 0        | 3.74E-04 | 0        | 3.10E-05 | 0        | 0        | 7.50E-05 | 0.004857 | 0.017651 | 0.010391 |
| 2.61E-04 | 0.101676 | 0.003796 | 0.2922   | 4.90E-04 | 0.168996 | 5.70E-05 | 1.48E-04 | 4.63E-04 | 1.93E-04 | 0.003315 | 0.005532 | 0        | 0        | 0        |
| 0        | 4.75E-04 | 2.90E-05 | 6.70E-05 | 4.90E-05 | 0        | 9.20E-05 | 0        | 0        | 1.01E-04 | 3.14E-04 | 2.30E-05 | 0        | 2.22E-04 | 0.019107 |
| 0        | 1.73E-04 | 0.001786 | 7.20E-05 | 2.60E-05 | 0        | 0        | 0        | 0        | 3.44E-04 | 0        | 0        | 3.60E-05 | 0.01557  | 0.005191 |
| 0        | 0        | 1.90E-05 | 4.85E-04 | 0        | 2.50E-04 | 0        | 0.054693 | 0        | 2.10E-05 | 0.085615 | 2.14E-04 | 0.0013   | 1.17E-04 | 5.00E-05 |
| 9.49E-04 | 0.34598  | 5.83E-04 | 0.037043 | 5.70E-05 | 0.108335 | 0        | 0        | 1.90E-04 | 0.001026 | 0.008555 | 0.007752 | 0        | 0        | 0        |
| 0        | 4.53E-04 | 6.10E-05 | 1.31E-04 | 0        | 4.04E-04 | 0        | 4.44E-04 | 0        | 1.60E-05 | 0        | 0        | 0        | 0.016457 | 0.023237 |
| 0        | 2.33E-04 | 0        | 1.19E-04 | 1.90E-05 | 0.001651 | 0        | 0        | 0        | 0        | 0        | 1.01E-04 | 0        | 0        | 0        |
| 0        | 2.29E-04 | 0        | 7.90E-05 | 9.31E-04 | 0        | 1.44E-04 | 0        | 0        | 4.50E-05 | 0        | 3.50E-05 | 0        | 0.005044 | 4.00E-05 |
| 0.012913 | 1.13E-04 | 0.004752 | 5.40E-05 | 9.72E-04 | 0        | 8.90E-04 | 0        | 3.30E-05 | 0.006536 | 0.078903 | 0        | 6.16E-04 | 8.42E-04 | 4.47E-04 |
| 0        | 1.12E-04 | 0        | 7.20E-05 | 0        | 3.90E-05 | 0        | 0.021052 | 6.80E-05 | 0        | 0.042644 | 7.47E-04 | 0.001813 | 5.86E-04 | 1.91E-04 |
| 2.90E-05 | 1.60E-05 | 0        | 0        | 0        | 4.30E-05 | 0        | 0        | 0        | 0        | 0        | 0        | 0        | 6.10E-05 | 0        |
| 2.62E-04 | 1.29E-04 | 7.60E-05 | 1.44E-04 | 0.001773 | 0        | 3.74E-04 | 0        | 0        | 9.66E-04 | 0        | 6.30E-05 | 1.72E-04 | 0.004435 | 0.002658 |
| 6.50E-05 | 2.10E-04 | 2.76E-04 | 7.90E-05 | 8.80E-05 | 6.90E-05 | 0        | 4.10E-05 | 3.50E-05 | 0        | 1.60E-05 | 0        | 0        | 0.007361 | 0.012704 |
| 1.44E-04 | 0.021914 | 6.70E-05 | 0.008754 | 0        | 0.00235  | 0        | 0.021034 | 4.00E-05 | 0        | 0.048638 | 0.011658 | 0.009194 | 2.07E-04 | 0        |
| 0        | 0        | 0        | 0        | 0        | 0        | 0        | 0        | 0        | 0        | 0        | 0        | 0        | 0        | 0        |
| 4.90E-05 | 3.00E-05 | 0        | 2.70E-05 | 2.50E-05 | 2.30E-05 | 0        | 0        | 0        | 0        | 0        | 0        | 0.024834 | 0.005873 | 0.010425 |
| 0        | 0.007883 | 0        | 8.20E-05 | 0        | 6.40E-05 | 0        | 8.30E-05 | 5.71E-04 | 0        | 0        | 0.0214   | 0        | 0        | 0        |
| 0        | 1.78E-04 | 6.20E-05 | 1.23E-04 | 6.90E-05 | 0        | 0.001807 | 0        | 0        | 0.005904 | 0        | 1.26E-04 | 0        | 0.001279 | 4.93E-04 |
| 0.001996 | 0.006103 | 0.006577 | 0.138472 | 6.06E-04 | 0.009579 | 5.30E-05 | 3.34E-04 | 0        | 0.001105 | 0.004878 | 0.002168 | 0        | 0        | 0        |
| 0        | 0        | 0        | 0        | 0        | 0        | 0        | 0        | 0        | 0        | 4.20E-05 | 0        | 5.23E-04 | 0        | 1.05E-04 |
| 1.12E-04 | 3.90E-05 | 0.002736 | 0        | 0        | 0        | 0        | 0        | 0        | 0        | 0        | 0        | 1.08E-04 | 8.10E-05 | 1.34E-04 |
| 0        | 2.14E-04 | 0        | 5.80E-05 | 0        | 0        | 0        | 1.20E-04 | 0        | 0        | 0        | 0        | 0.033885 | 0        | 0        |
| 0        | 1.70E-04 | 0        | 2.40E-05 | 0        | 0        | 0        | 1.23E-04 | 0        | 0        | 0        | 0        | 0        | 0        | 0        |
| 3.80E-05 | 0        | 1.90E-05 | 4.20E-05 | 0        | 0        | 0        | 2.06E-04 | 0        | 0        | 0        | 0        | 2.46E-04 | 0        | 0        |
| 0        | 0        | 0        | 0        | 0        | 0        | 1.83E-04 | 0        | 0        | 0        | 0        | 0        | 0        | 0        | 4.40E-05 |
| 0        | 1.90E-05 | 0        | 0        | 0        | 0        | 0        | 0        | 0        | 0        | 0        | 0        | 0        | 1.12E-04 | 0        |
| 0        | 0        | 0        | 0        | 0        | 0        | 0        | 0        | 0        | 0        | 0        | 0        | 8.30E-05 | 1.62E-04 | 0        |
| 0        | 0        | 0        | 0        | 0        | 0        | 4.20E-05 | 3.30E-05 | 3.40E-05 | 0        | 0        | 0        | 0        | 2.10E-05 | 0        |
| 0        | 0        | 0        | 0        | 0        | 0        | 0        | 3.00E-05 | 0        | 0        | 0        | 0        | 4.19E-04 | 0        | 0        |
| 0        | 2.42E-04 | 0        | 7.70E-05 | 0        | 0        | 4.00E-05 | 0        | 0        | 1.90E-05 | 0        | 0        | 0        | 0        | 0        |
| 0        | 0        | 1.80E-05 | 0        | 0        | 0        | 0        | 0        | 0        | 0        | 0        | 0        | 0.005554 | 0.004882 | 3.86E-04 |
| 2.60E-05 | 8.00E-05 | 0        | 0        | 6.40E-05 | 0        | 0        | 7.20E-05 | 0        | 0        | 0        | 6.00E-05 | 0        | 7.30E-05 | 2.84E-04 |
| 0        | 5.40E-05 | 0        | 0        | 0        | 0        | 0        | 2.60E-05 | 1.01E-04 | 0        | 0        | 0        | 0        | 2.20E-05 | 0        |
| 0        | 0.062775 | 5.10E-05 | 1.33E-04 | 4.80E-05 | 0.009246 | 0        | 0        | 0        | 6.80E-05 | 0        | 2.48E-04 | 0        | 0        | 0        |
| 0        | 4.70E-05 | 0        | 1.80E-05 | 0        | 0        | 0        | 0        | 0        | 0        | 0        | 0        | 1.92E-04 | 0.001023 | 0.001591 |
| 0        | 0        | 0        | 0        | 0        | 0        | 0        | 0        | 0        | 0        | 0        | 0        | 0        | 3.60E-04 | 7.96E-04 |
| 2.30E-05 | 0.006759 | 2.94E-04 | 4.17E-04 | 3.10E-05 | 0.03614  | 0        | 3.90E-05 | 4.50E-05 | 0        | 8.27E-04 | 0.002151 | 0        | 1.90E-05 | 0        |
| 0        | 0        | 0        | 1.90E-05 | 0        | 0        | 0        | 0.010211 | 0        | 0        | 0        | 0        | 0        | 3.97E-04 | 0        |
| 0        | 0        | 0        | 0        | 0        | 0        | 0        | 0        | 0        | 0        | 0        | 0        | 0        | 0        | 0        |
| 0        | 0        | 0        | 3.60E-05 | 0        | 0        | 0        | 0        | 0        | 0        | 0        | 0        | 0        | 0.001106 | 3.64E-04 |
| 0        | 0        | 0        | 0        | 0        | 0        | 0        | 0        | 0        | 0        | 0        | 0        | 0        | 0        | 0        |
| 2.78E-04 | 1.47E-04 | 3.47E-04 | 0        | 2.70E-05 | 0.01124  | 0        | 3.70E-05 | 0.002111 | 8.80E-05 | 0.006358 | 0.008292 | 0        | 0        | 0        |
| 6.88E-04 | 0.018321 | 6.91E-04 | 1.40E-05 | 0        | 6.90E-05 | 0        | 1.82E-04 | 0        | 0.001304 | 1.02E-04 | 2.03E-04 | 0        | 0        | 5.00E-05 |
| 1.09E-04 | 0.011691 | 3.10E-05 | 0        | 4.77E-04 | 0.00184  | 0        | 2.61E-04 | 0        | 4.70E-04 | 0        | 5.50E-05 | 0        | 0        | 0        |
| 5.43E-04 | 0.003037 | 7.92E-04 | 0.011268 | 6.50E-05 | 0.001149 | 0        | 3.70E-05 | 0        | 9.90E-05 | 5.76E-04 | 1.74E-04 | 0        | 0        | 0        |
| 0.006888 | 0        | 0.010609 | 0        | 0        | 0        | 0        | 0        | 0        | 0.002071 | 0        | 0        | 0        | 5.80E-05 | 9.70E-05 |
| 0.005094 | 0.02744  | 0.005234 | 0.02277  | 0.001853 | 0.012797 | 0.00286  | 0.003721 | 0.003126 | 0.002864 | 0.009948 | 0.005083 | 0.011914 | 0.008587 | 0.011415 |

| HC16     | HC01     | HC51     | HC56     | HC30     | HC55     | HC17     | HC71     | HC29     | HC49     | HC34     | HC03     | HC69     | HC28     | HC04     |
|----------|----------|----------|----------|----------|----------|----------|----------|----------|----------|----------|----------|----------|----------|----------|
| 0.607567 | 0.597313 | 0.553274 | 0.48699  | 0.48329  | 0.458137 | 0.440656 | 0.380684 | 0.377209 | 0.371399 | 0.356086 | 0.354185 | 0.344536 | 0.344501 | 0.330848 |
| 0.049559 | 0.142727 | 0.138581 | 0.107389 | 0.129471 | 0.148134 | 0.092243 | 0.104727 | 0.106774 | 0.169464 | 0.335645 | 0.160375 | 0.022814 | 0.32735  | 0.002077 |
| 0.063051 | 0.063111 | 0.033982 | 0.017511 | 0.033855 | 0.059777 | 0.106692 | 0.064086 | 0.149134 | 0.045942 | 0.074971 | 0.104752 | 0.182483 | 0.053832 | 0.203716 |
| 0.008947 | 0.00494  | 0.025267 | 0.009308 | 0.009966 | 0.001684 | 5.55E-04 | 0.021925 | 0.02799  | 0.015948 | 0.003183 | 0.007131 | 0.012328 | 0.029709 | 3.60E-05 |
| 2.16E-04 | 6.23E-04 | 0.001127 | 0        | 1.57E-04 | 7.04E-04 | 0        | 1.21E-04 | 9.75E-04 | 5.01E-04 | 0        | 1.07E-04 | 8.31E-04 | 1.35E-04 | 0.249306 |
| 0.071883 | 0.027214 | 0.024479 | 0.086942 | 0.015114 | 0.118055 | 0.090366 | 0.06646  | 0.045582 | 0.054053 | 0.09439  | 0.038545 | 0.066226 | 0.053148 | 0.10962  |
| 0        | 0        | 1.97E-04 | 0.084491 | 3.00E-05 | 0        | 0        | 4.84E-04 | 0        | 7.60E-05 | 1.23E-04 | 2.14E-04 | 3.20E-05 | 3.30E-05 | 4.80E-05 |
| 0        | 0        | 0        | 0.001724 | 0.001834 | 0        | 0        | 0        | 0        | 0        | 0        | 0        | 0        | 0        | 0        |
| 8.00E-04 | 7.75E-04 | 9.60E-05 | 2.60E-05 | 3.11E-04 | 4.33E-04 | 0.002139 | 9.95E-04 | 0.007734 | 5.21E-04 | 6.60E-05 | 1.72E-04 | 2.00E-04 | 0.001172 | 0.001209 |
| 0.00462  | 0.005787 | 0.029699 | 0.014258 | 0.045899 | 0.001296 | 0.024783 | 0.089871 | 0.002081 | 0.014664 | 0.003104 | 0.013201 | 0.015317 | 0.005474 | 1.81E-04 |
| 0.017536 | 0.012897 | 0.050119 | 0.01261  | 0.010351 | 0.072357 | 0.041351 | 0.029481 | 0.011087 | 0.06635  | 0        | 0.036139 | 0.03035  | 0.024967 | 3.40E-05 |
| 0        | 7.00E-05 | 0.001703 | 0        | 0.007633 | 2.50E-05 | 0        | 3.03E-04 | 0.114603 | 0.092709 | 0        | 5.30E-05 | 0.144878 | 3.90E-05 | 3.80E-05 |
| 0.022398 | 0.020737 | 0.021391 | 0.005873 | 0.013759 | 0.033372 | 0.010193 | 0.020384 | 0.068679 | 0.026134 | 0        | 0.050729 | 0.043772 | 0.02905  | 2.18E-04 |
| 0.037822 | 0.015336 | 0.023974 | 0.011886 | 0.007703 | 0.033471 | 0.044891 | 0.031853 | 0.015223 | 0.029152 | 0.023411 | 0.021073 | 0.024104 | 0.031246 | 0.006001 |
| 0.008769 | 6.29E-04 | 0.003113 | 6.03E-04 | 0.002543 | 6.01E-04 | 0.006071 | 4.24E-04 | 0.006785 | 0.002546 | 0.003335 | 0.032301 | 0.001287 | 0.007381 | 1.90E-05 |
| 0        | 0        | 0        | 0        | 0        | 0        | 0        | 0        | 0        | 0        | 0        | 0        | 6.90E-05 | 0        | 1.41E-04 |
| 0.00402  | 0        | 0.001331 | 0.016855 | 0.052797 | 0        | 0.002681 | 0.059177 | 7.20E-04 | 0.001545 | 0.004182 | 0.014426 | 0.011055 | 0.001151 | 2.00E-05 |
| 0.002983 | 0.035484 | 0.006175 | 0.004708 | 0.001012 | 0        | 0.009091 | 0.008463 | 0.010776 | 0.00393  | 0.00115  | 0.041965 | 0.003557 | 0.013039 | 3.68E-04 |
| 0.011441 | 0        | 0.017477 | 0.006672 | 0.027715 | 0        | 0.004452 | 0.019999 | 0        | 0.00782  | 0        | 0.018673 | 0.019884 | 0.010765 | 0        |
| 0.004982 | 0.002448 | 0.008147 | 0.013547 | 0.008687 | 0.008739 | 0.011428 | 0.010499 | 0.003257 | 0.030152 | 5.69E-04 | 0.002378 | 0.006679 | 0.021371 | 4.60E-05 |
| 4.30E-05 | 3.20E-05 | 0        | 0        | 0        | 0        | 0        | 0        | 3.60E-05 | 5.00E-05 | 0        | 5.30E-05 | 3.40E-05 | 3.80E-05 | 6.98E-04 |
| 0.012315 | 0.006009 | 0.0046   | 7.06E-04 | 0.002366 | 0.020439 | 0.014512 | 0.002828 | 0.021262 | 0.001983 | 0.01892  | 0.013663 | 0.001217 | 0.005577 | 0        |
| 0.007222 | 0.01135  | 0.007597 | 0.002283 | 9.34E-04 | 0.009551 | 0.013828 | 0.009336 | 8.00E-05 | 0.007288 | 0.002368 | 0.015368 | 0.010267 | 0.007605 | 5.10E-04 |
| 2.02E-04 | 1.91E-04 | 7.84E-04 | 0        | 2.40E-05 | 4.15E-04 | 2.10E-05 | 0.004338 | 1.53E-04 | 0.00409  | 2.42E-04 | 0.003381 | 0        | 0.002999 | 0.002433 |
| 0        | 0        | 0        | 0        | 0        | 0        | 0        | 0        | 0        | 0        | 2.50E-05 | 0        | 0        | 3.10E-05 | 2.63E-04 |
| 7.73E-04 | 0        | 0        | 0.005245 | 0        | 0        | 0.021203 | 0.015408 | 0        | 0.007193 | 0.023242 | 0        | 0.002453 | 0        | 0.053277 |
| 0        | 0        | 0        | 0        | 0.034632 | 0        | 0        | 0        | 0        | 0        | 0        | 6.40E-05 | 0.002305 | 0        | 0        |
| 0.001355 | 0        | 0.001412 | 0.013954 | 6.63E-04 | 0.001279 | 0.001512 | 0.004718 | 0.001315 | 0.006993 | 0.002664 | 9.44E-04 | 2.87E-04 | 4.62E-04 | 5.65E-04 |
| 0        | 6.40E-05 | 0        | 0.00199  | 2.90E-05 | 9.10E-05 | 1.79E-04 | 0        | 1.82E-04 | 5.80E-05 | 7.27E-04 | 2.66E-04 | 1.00E-04 | 6.80E-05 | 0.002288 |
| 1.12E-04 | 6.64E-04 | 0.005176 | 0        | 0.001388 | 3.51E-04 | 0.001249 | 0.001665 | 0.003615 | 0.003283 | 0.001612 | 0.016327 | 3.66E-04 | 6.30E-05 | 0.009695 |
| 0.008827 | 0.00549  | 4.90E-05 | 0.008081 | 0.013939 | 4.07E-04 | 2.80E-05 | 0        | 0        | 0        | 0        | 0.006424 | 0.006269 | 0.003819 | 1.24E-04 |
| 0.001879 | 0.001948 | 0.005838 | 0.003304 | 0.011487 | 0.002736 | 0.005949 | 0.002936 | 1.36E-04 | 0.002611 | 0.002011 | 0.001702 | 0.001455 | 3.37E-04 | 4.89E-04 |
| 0.003425 | 0.010074 | 7.98E-04 | 0.009096 | 0.007758 | 0.003257 | 0.002603 | 0.008805 | 0.001002 | 0.002114 | 0.012875 | 0        | 0.008807 | 0.003332 | 0.005854 |
| 0        | 0.001028 | 5.60E-05 | 0        | 5.90E-05 | 2.70E-05 | 4.70E-05 | 2.22E-04 | 1.56E-04 | 0.002852 | 0        | 6.34E-04 | 4.10E-05 | 3.86E-04 | 2.80E-05 |
| 0        | 0        | 0        | 0        | 0        | 0        | 0        | 0        | 0        | 0        | 0        | 0        | 0        | 0        | 0        |
| 0.001268 | 0.006482 | 0.004253 | 6.39E-04 | 0.007451 | 0.012247 | 0.015637 | 0.017508 | 0.001427 | 0.003781 | 0.009567 | 0.011149 | 0.003361 | 0.004413 | 0        |
| 2.03E-04 | 5.80E-05 | 2.41E-04 | 0        | 0        | 0        | 0        | 1.28E-04 | 5.92E-04 | 0        | 0        | 0        | 3.38E-04 | 1.98E-04 | 2.10E-05 |
| 0.005525 | 0.00186  | 0.00152  | 0.001948 | 9.36E-04 | 0.001507 | 0.00383  | 0.002545 | 0.00479  | 0.002237 | 8.07E-04 | 0.005145 | 0.002311 | 0.001822 | 1.06E-04 |
| 0        | 0        | 0        | 0        | 0        | 0        | 0        | 0        | 0        | 0        | 0        | 0        | 0        | 0        | 0        |
| 0        | 9.85E-04 | 0.001285 | 0        | 0.002741 | 0        | 0.00168  | 0        | 0        | 0        | 0        | 5.93E-04 | 0        | 0        | 0.001405 |
| 0.003688 | 0.005913 | 3.92E-04 | 7.16E-04 | 9.04E-04 | 0.006817 | 0.00397  | 0.001131 | 0.005049 | 3.93E-04 | 0.002243 | 0.00276  | 0.00229  | 0.002247 | 0        |
| 0        | 0        | 0        | 0        | 0        | 0        | 0        | 0        | 0        | 0        | 0        | 0.009197 | 0        | 9.10E-05 | 0        |
| 0        | 0        | 0        | 0.007234 | 0        | 0        | 0        | 0        | 0        | 0        | 0        | 0        | 0        | 0        | 0        |
| 0        | 7.00E-05 | 5.40E-05 | 0        | 0        | 0        | 1.40E-05 | 0        | 0        | 5.70E-05 | 0        | 0        | 0        | 0        | 1.89E-04 |
| 0        | 0        | 0.013409 | 2.70E-04 | 0.001229 | 0        | 0        | 7.25E-04 | 0        | 0        | 0        | 0        | 2.46E-04 | 0        | 0        |
| 0.01986  | 0        | 0        | 0.003438 | 0.011463 | 0        | 0        | 8.45E-04 | 0        | 0        | 0        | 0        | 0        | 2.06E-04 | 0        |
| 1.97E-04 | 0        | 2.93E-04 | 6.20E-05 | 0.001361 | 7.90E-05 | 1.62E-04 | 4.30E-05 | 0.005268 | 0.008897 | 9.10E-05 | 5.10E-05 | 0.004806 | 1.65E-04 | 0        |
| 2.65E-04 | 0        | 0        | 1.20E-04 | 0        | 0        | 0        | 2.14E-04 | 0        | 0        | 0        | 0        | 9.76E-04 | 0        | 0        |
| 0        | 3.40E-05 | 0.001163 | 0        | 0.001303 | 0        | 9.75E-04 | 0        | 0        | 0        | 3.70E-05 | 0.00111  | 0        | 6.50E-05 | 1.86E-04 |
| 0        | 0        | 4.30E-05 | 0.010669 | 0        | 0        | 0        | 0        | 0        | 0        | 0        | 0        | 0        | 0        | 0        |
| 0.007242 | 0        | 0.0011   | 6.70E-05 | 1.80E-04 | 1.51E-04 | 0.009663 | 1.56E-04 | 4.20E-05 | 0.003126 | 1.02E-04 | 4.77E-04 | 9.77E-04 | 8.82E-04 | 0.010045 |
| 0        | 0        | 2.00E-04 | 7.10E-04 | 0.002391 | 0        | 7.63E-04 | 6.13E-04 | 0        | 0        | 2.93E-04 | 4.50E-05 | 2.65E-04 | 0        | 0        |
| 0        | 0        | 0        | 0.006132 | 0.00127  | 0        | 0        | 3.47E-04 | 0        | 0        | 0        | 0        | 7.38E-04 | 0        | 0        |
| 0        | 0        | 0        | 0        | 0        | 0        | 0        | 0        | 0        | 0        | 0        | 0        | 0        | 0        | 5.80E-05 |
| 4.16E-04 | 0.003385 | 1.44E-04 | 4.89E-04 | 0.001248 | 1.91E-04 | 0.003918 | 4.36E-04 | 0.001344 | 2.50E-05 | 0.001542 | 0.004771 | 2.72E-04 | 2.70E-04 | 1.18E-04 |
| 1.52E-04 | 0        | 0        | 0.02176  | 8.60E-04 | 2.30E-05 | 8.70E-05 | 6.96E-04 | 0        | 4.39E-04 | 2.94E-04 | 1.16E-04 | 0.00193  | 1.73E-04 | 0        |
| 0        | 0        | 0        | 0        | 0        | 0        | 0        | 0        | 0        | 5.30E-05 | 0        | 0        | 0        | 0        | 4.40E-05 |
| 0        | 0.002104 | 5.10E-05 | 2.20E-05 | 2.00E-05 | 0        | 5.80E-05 | 1.31E-04 | 1.77E-04 | 2.50E-04 | 6.70E-05 | 5.70E-05 | 0        | 1.01E-04 | 0        |
| 0        | 0        | 0        | 0        | 0        | 0        | 0        | 0        | 0        | 0        | 0        | 0        | 0        | 0        | 0        |
| 1.66E-04 | 0        | 0        | 5.10E-04 | 0.018575 | 0        | 0        | 5.74E-04 | 0        | 0        | 1.69E-04 | 0        | 5.44E-04 | 0        | 0        |
| 0        | 0        | 0        | 0        | 0        | 0        | 0        | 0        | 0        | 0        | 0        | 0        | 0        | 0        | 0        |
| 0        | 0        | 0        | 0        | 0        | 0        | 0        | 0        | 0        | 0        | 0        | 0        | 0        | 0        | 1.15E-04 |
| 0        | 0        | 0        | 0        | 0        | 0        | 0        | 0        | 0        | 0        | 0        | 0        | 0        | 0        | 2.00E-05 |
| 0        | 3.00E-05 | 0        | 2.80E-05 | 0        | 0        | 0        | 3.80E-05 | 0        | 0        | 0        | 1.03E-04 | 0        | 0        | 6.37E-04 |
| 0        | 0        | 0        | 0        | 0        | 0        | 0        | 0        | 0        | 0        | 0        | 0        | 0        | 0        | 0        |
| 0        | 0        | 0        | 0        | 0        | 0        | 0        | 0        | 0        | 0        | 0        | 0        | 0        | 0        | 0        |
| 0.008271 | 0.012138 | 0.00941  | 0.019134 | 0.023335 | 0.003647 | 0.01052  | 0.013678 | 0.004765 | 0.009321 | 0.019887 | 0.009181 | 0.016943 | 0.010287 | 0.006906 |

| HC64     | HC63     | HC36     | HC11     | HC65     | HC09     | HC67     | HC24     | HC06     | HC05     | HC15     | HC46     | HC48     | HC41     | HC38     |
|----------|----------|----------|----------|----------|----------|----------|----------|----------|----------|----------|----------|----------|----------|----------|
| 0.325789 | 0.315839 | 0.314838 | 0.301463 | 0.291402 | 0.290562 | 0.286901 | 0.276351 | 0.253405 | 0.241882 | 0.200212 | 0.196328 | 0.194954 | 0.183341 | 0.178353 |
| 0.083575 | 0.180654 | 0.108971 | 0.38911  | 0.118025 | 0.297992 | 0.078964 | 0.134655 | 0.36504  | 0.001145 | 0.266663 | 0.238975 | 0.13935  | 0.235796 | 0.150524 |
| 0.019527 | 0.10287  | 0.118302 | 0.03541  | 0.043604 | 0.08447  | 0.074141 | 0.068635 | 0.026585 | 0.027299 | 0.077091 | 0.037099 | 0.132589 | 0.242902 | 0.032182 |
| 0.002621 | 0.001012 | 0.017063 | 0.01656  | 0.020734 | 0.013796 | 0.010437 | 0.0072   | 0.037784 | 0        | 0.002568 | 0.004727 | 2.34E-04 | 0.005992 | 0.005131 |
| 1.72E-04 | 7.34E-04 | 2.90E-05 | 0        | 0.004085 | 8.00E-05 | 5.90E-05 | 2.72E-04 | 0.002563 | 0.413251 | 1.77E-04 | 0.011561 | 0.155375 | 2.20E-05 | 0        |
| 0.025855 | 0.067596 | 0.10696  | 0.037297 | 0.044879 | 0.059221 | 0.038096 | 0.08131  | 0.037998 | 0.002003 | 0.090295 | 0.024747 | 0.010059 | 0.062115 | 0.029093 |
| 4.80E-04 | 1.40E-04 | 1.32E-04 | 0        | 0        | 8.00E-05 | 2.75E-04 | 8.30E-05 | 1.40E-05 | 9.40E-05 | 1.07E-04 | 0        | 2.10E-05 | 6.50E-05 | 0.335396 |
| 0        | 0        | 0        | 0        | 0        | 4.50E-05 | 0        | 2.81E-04 | 5.85E-04 | 0        | 0        | 0        | 0        | 0        | 3.40E-05 |
| 5.10E-04 | 1.41E-04 | 1.47E-04 | 0.001048 | 3.71E-04 | 6.76E-04 | 7.00E-04 | 8.48E-04 | 6.43E-04 | 5.23E-04 | 6.42E-04 | 0.010455 | 1.49E-04 | 5.44E-04 | 2.90E-05 |
| 0.001524 | 0.020129 | 0.008629 | 0.009751 | 0.010792 | 0.005824 | 0.019354 | 0.05563  | 0.020878 | 8.90E-05 | 0.004703 | 0.001263 | 2.03E-04 | 0.072276 | 0.014346 |
| 0.018945 | 0.014498 | 0.016158 | 0.017367 | 0.007637 | 0.015913 | 0.053329 | 0.057222 | 0.031915 | 0        | 0.017837 | 0.036053 | 0.01347  | 0.012193 | 0.058193 |
| 0.212363 | 0        | 6.80E-05 | 0.018226 | 0.006633 | 0        | 3.11E-04 | 4.00E-05 | 0        | 0        | 3.60E-05 | 0.062621 | 0        | 0        | 0.014907 |
| 0.051669 | 0.042154 | 0.004716 | 0.023693 | 0.007261 | 0.02014  | 0.025004 | 0.044034 | 0.014688 | 0        | 0.059257 | 0.220535 | 0.028416 | 0.008005 | 0.02516  |
| 0.013743 | 0.039044 | 0.066135 | 0.022509 | 0.024522 | 0.033362 | 0.03028  | 0.035533 | 0.018068 | 0.003037 | 0.021152 | 0.030125 | 0.032739 | 0.069908 | 0.03052  |
| 0.012602 | 0.003855 | 0.070837 | 0.002895 | 0.019584 | 3.94E-04 | 0.007058 | 0.003217 | 7.04E-04 | 5.10E-05 | 0.100273 | 0.002804 | 0        | 6.10E-05 | 2.99E-04 |
| 0        | 5.50E-05 | 0        | 0        | 3.20E-05 | 0        | 0        | 0        | 0        | 4.23E-04 | 0        | 0        | 0        | 0        | 0        |
| 0.002163 | 0.009588 | 0.003721 | 0.005826 | 0.012651 | 0.010473 | 0.003451 | 0.012468 | 0.01345  | 7.28E-04 | 0        | 0        | 0        | 0.002238 | 0.001384 |
| 0.107009 | 0.024721 | 0.001405 | 0.045123 | 2.34E-04 | 0.051479 | 0.013372 | 0.006463 | 0.001023 | 6.70E-05 | 0.006836 | 0.025428 | 0.140151 | 0.005739 | 0.010609 |
| 0.005483 | 0.056669 | 0.0029   | 0.002943 | 0.012222 | 0        | 0.015674 | 0.04406  | 0.068901 | 0        | 0.05167  | 0.013005 | 0        | 0.006439 | 0.017827 |
| 0.006973 | 0.033489 | 0.01308  | 0.030923 | 0.003343 | 0.01158  | 0.003233 | 0.008869 | 0.013616 | 5.00E-05 | 0.005849 | 0.008959 | 0        | 0.021444 | 0.008711 |
| 1.97E-04 | 0        | 0        | 3.00E-05 | 6.50E-05 | 0        | 0        | 0        | 9.30E-05 | 0        | 4.14E-04 | 1.32E-04 | 0        | 0        | 3.20E-05 |
| 0.004311 | 0.006165 | 0.03145  | 0.001439 | 7.22E-04 | 0.013791 | 0.006224 | 0.004535 | 0.002878 | 1.93E-04 | 0.018174 | 0.004272 | 0.011237 | 0.002622 | 0.001289 |
| 0.003548 | 0.015723 | 0.015638 | 0.017053 | 0.002753 | 0.029322 | 0.011611 | 0.026486 | 0.005072 | 3.67E-04 | 0.006783 | 0.007989 | 1.46E-04 | 0.023827 | 0.006565 |
| 0.015114 | 3.30E-04 | 0        | 7.00E-05 | 3.02E-04 | 0.001065 | 0.004153 | 0.001201 | 0.00211  | 0.12967  | 0.00407  | 0.018292 | 0.004563 | 0.005376 | 0.002709 |
| 4.20E-05 | 0        | 0        | 3.20E-05 | 0        | 0        | 0        | 0        | 1.30E-05 | 0        | 0        | 3.29E-04 | 5.10E-05 | 3.50E-05 | 0        |
| 0.002473 | 0        | 8.27E-04 | 0        | 0.012636 | 0.010805 | 4.99E-04 | 0.013713 | 0.001853 | 1.69E-04 | 0.019032 | 0        | 0        | 0.006317 | 0.001414 |
| 0.024561 | 0        | 0.020218 | 0        | 0.256401 | 0        | 0        | 0        | 0        | 0        | 0        | 1.04E-04 | 0        | 0        | 0        |
| 8.85E-04 | 0.001214 | 0.003004 | 7.39E-04 | 0.001831 | 7.86E-04 | 0.022014 | 0.042709 | 0.013033 | 0.001209 | 2.29E-04 | 2.70E-04 | 3.82E-04 | 0.002729 | 0.010628 |
| 0        | 8.90E-05 | 4.30E-05 | 6.60E-05 | 1.37E-04 | 9.50E-05 | 0        | 1.94E-04 | 1.60E-05 | 6.97E-04 | 1.47E-04 | 3.80E-05 | 2.14E-04 | 3.50E-05 | 0.003048 |
| 0.020496 | 0.003207 | 0.001099 | 5.09E-04 | 0.003032 | 0.002649 | 0.002515 | 0.003935 | 0.00388  | 0.002387 | 0.007516 | 0.00721  | 0.006805 | 0.001555 | 0.00286  |
| 0.001306 | 0.024175 | 0.019969 | 1.41E-04 | 3.60E-05 | 0        | 0        | 5.60E-05 | 0.00988  | 4.30E-05 | 0.001634 | 2.59E-04 | 0        | 0        | 0.006555 |
| 9.28E-04 | 0.002611 | 0.009575 | 1.85E-04 | 0.01362  | 0.002504 | 0.002375 | 0.008183 | 0.002311 | 2.67E-04 | 0.003391 | 8.40E-05 | 0        | 6.65E-04 | 0.001337 |
| 0.001203 | 0        | 0.009372 | 0.001327 | 0.004475 | 0.00586  | 0.001493 | 0.009886 | 0.002319 | 0.001086 | 0.002468 | 5.29E-04 | 3.30E-05 | 8.91E-04 | 0.00214  |
| 0.004019 | 3.27E-04 | 6.20E-05 | 5.70E-05 | 3.90E-05 | 3.50E-05 | 2.98E-04 | 2.49E-04 | 4.49E-04 | 0.084211 | 6.65E-04 | 0.002328 | 4.60E-05 | 2.66E-04 | 0        |
| 0        | 0        | 0        | 0        | 0        | 0        | 0.231919 | 0        | 0        | 0        | 0        | 0        | 0        | 0        | 0        |
| 4.40E-05 | 0        | 3.50E-05 | 0.001436 | 0.015152 | 0.008445 | 5.61E-04 | 1.40E-04 | 0.003351 | 6.30E-05 | 3.50E-05 | 0        | 0.00306  | 9.40E-05 | 0.00134  |
| 2.36E-04 | 6.00E-05 | 1.93E-04 | 0        | 2.64E-04 | 0        | 5.80E-05 | 1.01E-04 | 0        | 0        | 8.40E-05 | 0        | 0        | 7.50E-05 | 6.30E-05 |
| 0.002073 | 0.007401 | 0.008716 | 0.001187 | 0.017887 | 0.002408 | 0.00542  | 0.005436 | 0.002617 | 5.20E-05 | 0.005935 | 0.004604 | 5.10E-05 | 0.001467 | 0.001405 |
| 0        | 0        | 0        | 0        | 0        | 0        | 0        | 0        | 0        | 0        | 0        | 0        | 0        | 0        | 0        |
| 0.003725 | 0        | 0        | 0        | 2.24E-04 | 0        | 0        | 2.29E-04 | 0.013389 | 0.046923 | 0        | 6.00E-04 | 0.06953  | 4.40E-05 | 0        |
| 1.36E-04 | 0.010771 | 0.002023 | 0.001756 | 0.004931 | 0.003066 | 0.002185 | 0.013457 | 4.51E-04 | 0        | 0.005424 | 0.003307 | 0        | 0.002752 | 0.003167 |
| 3.34E-04 | 0        | 0        | 0        | 0.01017  | 0        | 0        | 0        | 0        | 0        | 0        | 0        | 0        | 0        | 0        |
| 0        | 0        | 0        | 0        | 0        | 0        | 0.010936 | 0        | 0        | 0        | 0        | 0        | 0        | 0        | 0.010438 |
| 0        | 0        | 0        | 6.30E-05 | 0        | 0        | 0        | 0        | 6.40E-05 | 0.016238 | 3.60E-05 | 9.50E-04 | 0.006676 | 0        | 0        |
| 0        | 2.65E-04 | 0        | 0        | 8.10E-04 | 0        | 0.003361 | 0.00506  | 0.003306 | 0        | 0        | 0        | 0        | 0.004706 | 0.003006 |
| 0.001291 | 0        | 0.002098 | 6.30E-04 | 0.010671 | 0        | 0.00821  | 9.26E-04 | 2.10E-04 | 0        | 0.001153 | 0        | 0        | 0.001006 | 4.50E-04 |
| 0.007372 | 3.00E-04 | 3.37E-04 | 0.004279 | 8.63E-04 | 0.001415 | 0.003126 | 4.30E-04 | 7.53E-04 | 0        | 1.48E-04 | 0.009158 | 0        | 1.66E-04 | 0.004273 |
| 0        | 0        | 0        | 0        | 0        | 0.001159 | 0.00122  | 0.002838 | 0.001758 | 0        | 0        | 0        | 0        | 9.29E-04 | 0        |
| 0.003032 | 2.90E-05 | 0        | 0        | 2.89E-04 | 0        | 0        | 4.00E-05 | 0.008994 | 0.022414 | 0        | 2.30E-05 | 0.026907 | 0        | 0        |
| 0        | 0        | 0        | 0        | 0        | 0.008439 | 0.002388 | 0.003343 | 0        | 0        | 0        | 0        | 0        | 0        | 0.001009 |
| 0.00285  | 0.002105 | 0.001698 | 4.87E-04 | 9.32E-04 | 0.00214  | 5.60E-05 | 9.14E-04 | 8.20E-05 | 2.00E-04 | 9.35E-04 | 4.95E-04 | 0.011145 | 4.40E-05 | 1.60E-04 |
| 0        | 5.10E-05 | 1.05E-04 | 0        | 2.32E-04 | 4.70E-05 | 9.23E-04 | 5.77E-04 | 3.08E-04 | 0        | 0        | 0        | 2.40E-05 | 1.50E-04 | 8.70E-05 |
| 0        | 1.41E-04 | 0        | 0        | 0        | 0        | 0.00206  | 0        | 1.90E-05 | 0        | 0        | 0        | 0        | 0        | 1.19E-04 |
| 0        | 0        | 0        | 0        | 0        | 0        | 0        | 0        | 0        | 0        | 0        | 2.20E-05 | 0        | 0        | 0        |
| 2.60E-04 | 8.96E-04 | 0.001172 | 2.80E-05 | 0.001538 | 4.50E-05 | 0        | 8.20E-04 | 7.30E-05 | 3.87E-04 | 0.001388 | 3.02E-04 | 5.50E-05 | 3.20E-05 | 0        |
| 1.28E-04 | 6.10E-05 | 0.00141  | 5.80E-05 | 1.38E-04 | 9.20E-05 | 0.001136 | 8.55E-04 | 2.90E-05 | 0        | 0        | 1.60E-05 | 0        | 2.62E-04 | 0.006565 |
| 4.50E-05 | 0        | 4.20E-05 | 0        | 0        | 0        | 6.60E-05 | 0        | 1.80E-05 | 0        | 3.40E-05 | 1.80E-05 | 0        | 0        | 0        |
| 9.16E-04 | 6.60E-05 | 0        | 0.001457 | 3.80E-05 | 4.46E-04 | 4.22E-04 | 0        | 0.001328 | 0        | 3.54E-04 | 0.004878 | 0        | 0.001093 | 1.44E-04 |
| 0        | 0        | 0        | 0        | 0        | 0        | 7.41E-04 | 0        | 0        | 0        | 0        | 0        | 0        | 0        | 0        |
| 0        | 0.002196 | 1.27E-04 | 5.14E-04 | 9.06E-04 | 3.39E-04 | 5.25E-04 | 6.15E-04 | 2.41E-04 | 0        | 0        | 0        | 0        | 2.01E-04 | 1.43E-04 |
| 0        | 0        | 0        | 0        | 0        | 0        | 0        | 0        | 0        | 0        | 0        | 0        | 0        | 0        | 0        |
| 0        | 0        | 0        | 0        | 3.50E-05 | 0        | 0        | 5.60E-05 | 0        | 0        | 0        | 4.60E-05 | 0        | 3.00E-05 | 3.10E-05 |
| 9.80E-05 | 0        | 0        | 0        | 0        | 0        | 0        | 0        | 2.00E-05 | 0        | 6.80E-05 | 2.10E-05 | 0        | 0        | 0        |
| 0        | 0        | 0        | 2.90E-05 | 2.60E-05 | 0        | 0        | 5.50E-05 | 3.60E-05 | 0        | 2.80E-05 | 7.30E-05 | 2.30E-05 | 0        | 0        |
| 0        | 0        | 0        | 0        | 0        | 0        | 0        | 0        | 0        | 0        | 0        | 0        | 0        | 0        | 0        |
| 0        | 0        | 0        | 0        | 0        | 0        | 0        | 0        | 0        | 0        | 0        | 0        | 0        | 0        | 0        |
| 0.007374 | 0.008629 | 0.016695 | 0.006284 | 0.010834 | 0.00896  | 0.012866 | 0.01579  | 0.011186 | 0.002782 | 0.014487 | 0.008966 | 0.011342 | 0.013551 | 0.016325 |

| HC54     | HC08     | HC60     | HC62     | HC47     | HC27     | HC13     | HC52     | HC68     | HC58     | HC22     | HC23     | HC32     | HC35     | HC40     |
|----------|----------|----------|----------|----------|----------|----------|----------|----------|----------|----------|----------|----------|----------|----------|
| 0.176067 | 0.164199 | 0.156847 | 0.138193 | 0.127968 | 0.113021 | 0.088914 | 0.085345 | 0.081658 | 0.061063 | 0.044742 | 0.032466 | 0.021376 | 0.02048  | 0.020359 |
| 0.054795 | 0.076985 | 0.066159 | 0.057465 | 0.012243 | 0.073752 | 0.12128  | 0.230501 | 0.127348 | 0.0298   | 0.064513 | 0.11964  | 0.092179 | 0.188548 | 0.363266 |
| 0.059087 | 0.086241 | 0.049882 | 0.055245 | 0.025706 | 0.046351 | 0.105735 | 0.076217 | 0.084954 | 0.152773 | 0.089336 | 0.048628 | 0.02264  | 0.033485 | 0.018819 |
| 0.073467 | 0.020047 | 0.006417 | 0.021557 | 0.02544  | 0.029914 | 0.023348 | 0.03161  | 0.003465 | 0.006719 | 0.008682 | 0.01391  | 0.009542 | 0.009283 | 0.006287 |
| 4.13E-04 | 5.70E-04 | 0.01115  | 0.001387 | 0        | 0.00251  | 4.70E-05 | 0.003061 | 0.022923 | 7.24E-04 | 0.327112 | 0.002211 | 0        | 0        | 2.49E-04 |
| 0.043107 | 0.124709 | 0.050984 | 0.027287 | 0.05635  | 0.051154 | 0.236779 | 0.051914 | 0.061514 | 0.034508 | 0.083457 | 0.047441 | 0.022168 | 0.078037 | 0.029484 |
| 0.100941 | 1.59E-04 | 0.208631 | 0.093116 | 0        | 0.008446 | 1.83E-04 | 7.18E-04 | 4.10E-05 | 0.143763 | 6.76E-04 | 0.526878 | 0.679279 | 0.229791 | 0.443333 |
| 4.14E-04 | 0        | 0        | 0.003832 | 0        | 4.70E-05 | 0        | 0        | 0        | 0        | 0        | 0        | 9.30E-05 | 0        | 2.52E-04 |
| 7.10E-05 | 0.001563 | 0.002336 | 2.90E-05 | 7.54E-04 | 1.10E-04 | 2.09E-04 | 3.14E-04 | 2.71E-04 | 9.50E-04 | 2.74E-04 | 2.59E-04 | 0.003547 | 0.012946 | 1.30E-04 |
| 0.055333 | 0.135865 | 0.124532 | 0.216963 | 0.186682 | 0.361047 | 0.017887 | 0.007198 | 0.001049 | 0.095489 | 0.002186 | 0.014842 | 0.003256 | 0.011383 | 0.026221 |
| 0.066519 | 0.034843 | 0.015767 | 0.03878  | 0.001484 | 0.025376 | 0.114476 | 0.067104 | 0.093086 | 0.012338 | 0.032662 | 0.020764 | 0.014791 | 0.019811 | 0.003961 |
| 0.06666  | 0.004782 | 0.025682 | 3.10E-05 | 0        | 0.044349 | 3.80E-05 | 0.192503 | 0.340897 | 0.10458  | 2.30E-05 | 0.008506 | 9.30E-05 | 5.75E-04 | 0        |
| 0.012922 | 0.014247 | 0.011071 | 0.013689 | 0.001498 | 0.007042 | 0.018339 | 0.056143 | 0.012669 | 0.043766 | 0.083493 | 0.007838 | 0.017635 | 0.017488 | 0.007261 |
| 0.029136 | 0.041182 | 0.013643 | 0.023795 | 0.015106 | 0.021147 | 0.070182 | 0.036747 | 0.04068  | 0.016723 | 0.010848 | 0.01868  | 0.013275 | 0.027327 | 0.014966 |
| 7.36E-04 | 0.002862 | 8.20E-04 | 0.003762 | 0.111942 | 0.014558 | 0.010208 | 0.005262 | 0.022198 | 9.40E-05 | 1.00E-04 | 0        | 0.002007 | 8.87E-04 | 9.10E-04 |
| 1.40E-04 | 0        | 0        | 0        | 0        | 2.40E-05 | 0        | 0        | 0        | 0        | 0.006922 | 3.20E-05 | 0        | 0        | 0        |
| 0.033563 | 0.021031 | 0.002576 | 0.060942 | 0.145307 | 0.015886 | 0.015277 | 0.027    | 6.18E-04 | 0.085439 | 7.25E-04 | 6.38E-04 | 4.61E-04 | 0.004221 | 0.001862 |
| 0.00426  | 0.007495 | 0.005355 | 0.014443 | 3.90E-05 | 0.002939 | 0.006847 | 0.004528 | 0.012232 | 0.005553 | 0.048844 | 0.006411 | 0.021627 | 0.001635 | 0.007353 |
| 0.007256 | 0.02922  | 0.017866 | 0.007621 | 0.017104 | 0.002608 | 0.040918 | 0.022304 | 0.002688 | 0.012196 | 0.002765 | 4.36E-04 | 0.004159 | 0.004878 | 0.003342 |
| 0.00472  | 0.015105 | 0.005582 | 0.006334 | 0.01246  | 0.006175 | 0.012643 | 0.009549 | 0.006161 | 0.005037 | 0.001559 | 0.021281 | 0.006136 | 0.013627 | 0.004652 |
| 4.70E-05 | 5.30E-05 | 4.00E-05 | 3.20E-05 | 3.22E-04 | 1.12E-04 | 4.40E-05 | 1.68E-04 | 1.45E-04 | 4.20E-05 | 8.80E-05 | 1.20E-04 | 1.41E-04 | 0        | 0        |
| 4.66E-04 | 0.005883 | 0.005692 | 7.57E-04 | 0.031328 | 3.34E-04 | 0.017553 | 0.001247 | 0.002986 | 0.001354 | 6.26E-04 | 5.41E-04 | 0.003638 | 0.012053 | 0.002791 |
| 0.007662 | 0.066705 | 0.003494 | 0.007894 | 0.002944 | 0.002327 | 0.006472 | 0.011606 | 0.012297 | 0.008621 | 0.046023 | 0.008506 | 0.014407 | 0.003359 | 0.004218 |
| 2.82E-04 | 5.00E-05 | 0.011229 | 0.002822 | 0        | 8.12E-04 | 0        | 0.002662 | 0.007189 | 0.003852 | 0.020831 | 0.001743 | 9.35E-04 | 0.116831 | 0.002005 |
| 0        | 4.90E-05 | 0        | 0        | 0        | 3.70E-05 | 0        | 3.40E-05 | 0        | 3.80E-05 | 8.30E-05 | 0        | 9.60E-05 | 2.63E-04 | 0        |
| 0.001023 | 0.00517  | 0.006866 | 0.010063 | 0.019645 | 0.004726 | 3.52E-04 | 0.003997 | 0.001944 | 0.069377 | 0        | 2.11E-04 | 0        | 0.031008 | 0        |
| 0.008782 | 0        | 0        | 0.061249 | 0        | 0.035082 | 0        | 0        | 0        | 0        | 0        | 0        | 0        | 0        | 0        |
| 0.048506 | 0.045098 | 0.039082 | 0.027058 | 0.002552 | 0.012952 | 0.002454 | 7.44E-04 | 0.001184 | 0.00351  | 0.003136 | 0.001525 | 8.30E-04 | 0.003767 | 0.009283 |
| 0        | 8.60E-05 | 0.010568 | 6.47E-04 | 0.001389 | 0.002992 | 1.39E-04 | 1.23E-04 | 5.90E-05 | 0.002549 | 2.06E-04 | 3.28E-04 | 0.001207 | 0        | 0        |
| 0.00589  | 5.20E-05 | 0.003822 | 0.007018 | 0.004716 | 0.004139 | 0.006344 | 0.012138 | 0.008191 | 0.002857 | 0.011252 | 0.001534 | 0.002481 | 0.046884 | 8.69E-04 |
| 0.081015 | 0        | 0.006112 | 0        | 0        | 0.024067 | 0.02228  | 0.011594 | 4.27E-04 | 1.44E-04 | 3.68E-04 | 0.010753 | 0.004237 | 1.12E-04 | 0.012589 |
| 0.006951 | 0.004191 | 0.004547 | 0.003747 | 0.008805 | 0.003506 | 0.002848 | 0.00214  | 0.001411 | 0.008323 | 0.002158 | 0.002616 | 6.63E-04 | 0.003136 | 0.001362 |
| 0.001597 | 0.005727 | 0.012202 | 0.019994 | 0.005943 | 0.00568  | 8.74E-04 | 0.00446  | 4.88E-04 | 0.017543 | 0        | 0.001715 | 4.24E-04 | 0.001538 | 6.29E-04 |
| 0        | 1.47E-04 | 1.47E-04 | 0        | 0        | 2.30E-05 | 8.80E-05 | 2.90E-05 | 0.003032 | 2.33E-04 | 1.86E-04 | 0        | 0.002651 | 0.001196 | 0        |
| 0        | 0        | 0        | 0        | 0        | 0        | 0        | 0        | 0        | 0        | 0        | 0        | 0        | 0        | 0        |
| 2.00E-05 | 0        | 3.70E-05 | 0.001871 | 1.11E-04 | 1.31E-04 | 0        | 0.004896 | 0.0099   | 0        | 0        | 8.68E-04 | 1.93E-04 | 0        | 0        |
| 0        | 0        | 0        | 2.94E-04 | 0.043003 | 0        | 0        | 0        | 2.12E-04 | 4.80E-05 | 0        | 0.005148 | 6.93E-04 | 0.001705 | 2.47E-04 |
| 0.008788 | 0.002835 | 0.005801 | 0.007478 | 0.006563 | 0.003515 | 0.010238 | 8.42E-04 | 0.005701 | 0.007989 | 8.00E-05 | 0.005595 | 0.001134 | 0.008196 | 0.001538 |
| 0        | 0        | 0        | 0        | 0        | 0        | 0        | 0        | 0        | 0        | 0        | 0        | 0        | 0        | 0        |
| 7.80E-05 | 0        | 0        | 0        | 2.90E-05 | 2.05E-04 | 2.45E-04 | 6.91E-04 | 0        | 0        | 0        | 5.98E-04 | 0.007293 | 0.050145 | 0        |
| 0.001373 | 0.008976 | 6.66E-04 | 1.00E-04 | 0.004991 | 5.15E-04 | 0.006466 | 0.001712 | 0.002148 | 0.001645 | 0.006506 | 0.000649 | 0        | 0        | 2.56E-04 |
| 0        | 0        | 0        | 0        | 0        | 0        | 0        | 0        | 0        | 0        | 0        | 0        | 0        | 0        | 0        |
| 0        | 0.029451 | 0.012759 | 0        | 0        | 0.003093 | 0        | 0.001295 | 0        | 0        | 0        | 0.002214 | 0        | 0.005274 | 0        |
| 0        | 0        | 0        | 3.90E-05 | 0        | 1.60E-05 | 0        | 0        | 1.01E-04 | 4.98E-04 | 0.090981 | 1.71E-04 | 0        | 0        | 0        |
| 0.010382 | 0.007311 | 0.010307 | 0.006959 | 0.020569 | 0.008491 | 0.002226 | 0        | 1.18E-04 | 0.012639 | 0        | 0.001137 | 0        | 0        | 2.42E-04 |
| 0.006913 | 0.003286 | 0.003729 | 0.002776 | 2.07E-04 | 3.37E-04 | 0.005739 | 0.001206 | 0        | 9.07E-04 | 0        | 9.44E-04 | 0.001269 | 0.001434 | 2.58E-04 |
| 0.002366 | 7.59E-04 | 6.94E-04 | 9.21E-04 | 1.40E-04 | 0.003809 | 3.84E-04 | 0.007774 | 0.013238 | 0.00327  | 0        | 0.001116 | 1.68E-04 | 4.26E-04 | 0        |
| 0        | 0.005065 | 3.81E-04 | 0.010522 | 0.048472 | 0.008219 | 0.002452 | 2.00E-05 | 7.60E-05 | 1.51E-04 | 0        | 0        | 8.50E-05 | 0        | 0.001344 |
| 2.70E-05 | 0        | 0        | 0        | 0        | 5.80E-05 | 1.97E-04 | 4.87E-04 | 0        | 0        | 0        | 2.27E-04 | 0.00431  | 0.015321 | 0        |
| 0        | 0.004764 | 8.12E-04 | 0        | 0        | 0.001385 | 0        | 0        | 3.50E-05 | 0.003721 | 0        | 0.001046 | 0        | 2.14E-04 | 2.43E-04 |
| 2.03E-04 | 0.004392 | 6.70E-05 | 5.67E-04 | 2.30E-05 | 8.54E-04 | 0.001145 | 0.003017 | 0.00273  | 8.00E-05 | 0.002084 | 0        | 1.40E-04 | 0        | 2.49E-04 |
| 1.20E-04 | 6.02E-04 | 0.009413 | 0.00239  | 0.009868 | 0.013898 | 0.002825 | 1.33E-04 | 2.85E-04 | 0.011411 | 1.04E-04 | 0.002718 | 0        | 0.002324 | 2.69E-04 |
| 5.30E-05 | 0        | 0.006526 | 0.008587 | 0.017935 | 0.010026 | 1.68E-04 | 0.005923 | 0        | 0.00129  | 0        | 0.00928  | 0        | 0.001381 | 6.03E-04 |
| 0        | 0        | 3.90E-05 | 0        | 0        | 0        | 0        | 0        | 0        | 0        | 2.70E-05 | 0        | 0        | 0        | 0        |
| 4.70E-05 | 1.21E-04 | 6.62E-04 | 6.42E-04 | 6.30E-04 | 2.90E-05 | 2.04E-04 | 4.45E-04 | 0        | 9.15E-04 | 1.13E-04 | 1.56E-04 | 0        | 1.03E-04 | 0        |
| 7.53E-04 | 0.001262 | 0.002305 | 0.003835 | 0.003335 | 7.17E-04 | 1.45E-04 | 8.80E-05 | 0        | 3.58E-04 | 0        | 0.001181 | 4.20E-05 | 0.001079 | 7.17E-04 |
| 0        | 0        | 0        | 0        | 0        | 0        | 0        | 0        | 0        | 0        | 0        | 0        | 4.30E-05 | 0        | 0        |
| 0        | 2.45E-04 | 1.48E-04 | 4.20E-05 | 0        | 0        | 0        | 6.08E-04 | 8.93E-04 | 0        | 0        | 5.40E-05 | 0.01314  | 0.001388 | 1.13E-04 |
| 0        | 0        | 0.039071 | 0        | 0        | 0        | 0        | 0        | 0        | 0        | 0        | 0        | 0        | 0        | 0        |
| 0        | 0.002264 | 0.002997 | 0.001529 | 8.71E-04 | 0.001285 | 3.78E-04 | 1.50E-05 | 3.60E-05 | 4.68E-04 | 0        | 5.26E-04 | 0        | 0        | 0        |
| 0        | 0        | 0.001259 | 0        | 0.002729 | 0        | 0        | 0        | 0        | 0        | 3.20E-05 | 0.03355  | 0        | 0        | 0        |
| 0        | 0        | 0        | 0        | 0        | 0        | 0        | 0        | 0        | 4.20E-05 | 0        | 0        | 0        | 0        | 0        |
| 0        | 0        | 0        | 0        | 0        | 1.40E-05 | 0        | 0        | 3.80E-05 | 0        | 0        | 0        | 4.00E-05 | 0        | 0        |
| 1.33E-04 | 5.80E-05 | 0        | 0        | 0        | 2.10E-05 | 0        | 0        | 1.63E-04 | 0        | 0        | 0        | 0        | 4.70E-05 | 0        |
| 0        | 0        | 0        | 0        | 0        | 0        | 0        | 0        | 0        | 0        | 0        | 0        | 0        | 0        | 0        |
| 0        | 0        | 0        | 0        | 1.47E-04 | 1.90E-05 | 0        | 0        | 0        | 5.60E-05 | 0        | 0        | 0        | 0        | 0        |
| 0.016916 | 0.014293 | 0.023226 | 0.025696 | 0.02265  | 0.020118 | 0.02443  | 0.011888 | 0.010521 | 0.024554 | 0.006197 | 0.012369 | 0.005476 | 0.016183 | 0.007468 |

**Table S22. The abundance and composition at the phylum level of each sample in the discovery cohort (48 healthy controls and 24 CP).  
observed OTUs in the discovery cohort (48 healthy controls and 24 CP) at the phylum level**

| ID                     | CP24     | CP05     | CP15     | CP04     | CP12     | CP14     | CP18     | CP27     | CP30     | CP13     | CP22     | CP33     |
|------------------------|----------|----------|----------|----------|----------|----------|----------|----------|----------|----------|----------|----------|
| Firmicutes             | 0.99793  | 0.992806 | 0.976088 | 0.962451 | 0.908069 | 0.886962 | 0.858401 | 0.819061 | 0.666197 | 0.659561 | 0.561531 | 0.512507 |
| Bacteroidetes          | 5.13E-04 | 0.004935 | 1.81E-04 | 0.010275 | 0.077754 | 0.093428 | 0.128869 | 0.150071 | 0.004488 | 0.03679  | 0.426536 | 0.38162  |
| Proteobacteria         | 4.02E-04 | 8.48E-04 | 0.006103 | 0.008209 | 0.009163 | 6.97E-04 | 0.009423 | 0.012821 | 0.012583 | 0.302569 | 0.009504 | 0.062129 |
| Actinobacteria         | 8.60E-04 | 9.34E-04 | 0.017583 | 0.007325 | 0.00159  | 0.016787 | 0.003089 | 0.00145  | 0.314147 | 9.10E-04 | 0.001433 | 6.32E-04 |
| Verrucomicrobia        | 0        | 0        | 4.50E-05 | 0.011438 | 0.001546 | 2.46E-04 | 3.00E-05 | 0.0132   | 9.60E-05 | 8.00E-05 | 0        | 0.030865 |
| Bacteria_unclassified  | 0        | 0        | 0        | 2.00E-04 | 9.94E-04 | 5.75E-04 | 6.10E-05 | 5.28E-04 | 1.28E-04 | 6.20E-05 | 1.79E-04 | 6.60E-04 |
| Fusobacteria           | 1.29E-04 | 0        | 0        | 2.00E-05 | 8.22E-04 | 9.52E-04 | 9.70E-05 | 2.30E-05 | 3.07E-04 | 0        | 6.80E-04 | 0.009976 |
| Candidate_division_TM7 | 0        | 4.77E-04 | 0        | 3.10E-05 | 0        | 3.53E-04 | 0        | 0.002846 | 0.00184  | 2.80E-05 | 1.37E-04 | 4.61E-04 |
| Tenericutes            | 0        | 0        | 0        | 0        | 0        | 0        | 0        | 0        | 0        | 0        | 0        | 0        |
| Cyanobacteria          | 1.66E-04 | 0        | 0        | 5.10E-05 | 0        | 0        | 3.00E-05 | 0        | 2.14E-04 | 0        | 0        | 0        |
| Synergistetes          | 0        | 0        | 0        | 0        | 6.20E-05 | 0        | 0        | 0        | 0        | 0        | 0        | 0.00115  |
| Lentisphaerae          | 0        | 0        | 0        | 0        | 0        | 0        | 0        | 0        | 0        | 0        | 0        | 0        |

| CP29     | CP28     | CP10     | CP34     | CP02     | CP36     | CP26     | CP07     | CP19     | CP03     | CP11     | CP17     | HC13     | HC68     | HC52     |
|----------|----------|----------|----------|----------|----------|----------|----------|----------|----------|----------|----------|----------|----------|----------|
| 0.502464 | 0.489822 | 0.449451 | 0.441246 | 0.404723 | 0.404007 | 0.305741 | 0.294415 | 0.292496 | 0.136845 | 0.118752 | 0.08627  | 0.864684 | 0.856447 | 0.85238  |
| 0.013048 | 0.008147 | 0.219496 | 0.490531 | 5.80E-05 | 0.544364 | 0.690041 | 0.17632  | 0.017277 | 9.59E-04 | 0.00125  | 0.002282 | 0.109084 | 0.082952 | 0.121698 |
| 0.015041 | 0.162477 | 0.29566  | 0.064749 | 0.006794 | 0.048552 | 0.003509 | 0.522478 | 0.455246 | 0.855459 | 0.006124 | 0.00517  | 0.009352 | 0.035454 | 0.019049 |
| 0.456727 | 0.337688 | 0.034853 | 0.001709 | 0.588335 | 0.002562 | 2.48E-04 | 2.57E-04 | 0.001925 | 2.50E-04 | 0.001393 | 0.00213  | 0.014164 | 0.023139 | 0.005549 |
| 9.90E-05 | 2.43E-04 | 0        | 0        | 0        | 0        | 7.30E-05 | 4.00E-05 | 0.232865 | 0.005753 | 0.872441 | 0.902936 | 0        | 0        | 0        |
| 0        | 0        | 5.40E-04 | 8.92E-04 | 0        | 1.81E-04 | 3.07E-04 | 0.002276 | 0        | 4.39E-04 | 0        | 0        | 0.002633 | 0.00166  | 7.64E-04 |
| 4.49E-04 | 2.07E-04 | 0        | 7.94E-04 | 0        | 0        | 0        | 0.003831 | 6.40E-05 | 3.40E-05 | 4.00E-05 | 0        | 0        | 1.85E-04 | 5.44E-04 |
| 0.011691 | 0        | 0        | 6.10E-05 | 5.50E-05 | 3.09E-04 | 8.10E-05 | 3.83E-04 | 1.09E-04 | 2.61E-04 | 0        | 4.70E-04 | 0        | 1.63E-04 | 0        |
| 0        | 0        | 0        | 0        | 0        | 0        | 0        | 0        | 0        | 0        | 0        | 0        | 0        | 0        | 0        |
| 4.81E-04 | 0.001416 | 0        | 1.80E-05 | 3.50E-05 | 2.50E-05 | 0        | 0        | 0        | 0        | 0        | 7.42E-04 | 0        | 0        | 0        |
| 0        | 0        | 0        | 0        | 0        | 0        | 0        | 0        | 1.80E-05 | 0        | 0        | 0        | 8.30E-05 | 0        | 1.60E-05 |
| 0        | 0        | 0        | 0        | 0        | 0        | 0        | 0        | 0        | 0        | 0        | 0        | 0        | 0        | 0        |

| HC41     | HC27     | HC46     | HC08     | HC06     | HC15     | HC24     | HC11     | HC58     | HC54     | HC09     | HC63     | HC67     | HC35     | HC64     |
|----------|----------|----------|----------|----------|----------|----------|----------|----------|----------|----------|----------|----------|----------|----------|
| 0.806995 | 0.803533 | 0.778179 | 0.752801 | 0.691808 | 0.68672  | 0.683662 | 0.682632 | 0.675434 | 0.673097 | 0.669463 | 0.664952 | 0.664354 | 0.661417 | 0.645506 |
| 0.188327 | 0.159092 | 0.196873 | 0.23635  | 0.271891 | 0.202787 | 0.30692  | 0.309188 | 0.316251 | 0.314048 | 0.318678 | 0.327923 | 0.312276 | 0.263861 | 0.32981  |
| 0.003051 | 0.016508 | 0.020297 | 0.005544 | 0.031098 | 0.003962 | 0.003438 | 0.003751 | 0.005206 | 0.008176 | 0.009981 | 0.002708 | 0.011547 | 0.070002 | 0.009437 |
| 2.99E-04 | 0.018449 | 0.003362 | 0.004198 | 0.001367 | 0.105306 | 0.004197 | 0.002957 | 0.001865 | 0.002268 | 5.88E-04 | 0.004001 | 0.007701 | 0.003157 | 0.013837 |
| 0        | 4.70E-05 | 0        | 0        | 5.85E-04 | 0        | 2.81E-04 | 0        | 0        | 4.14E-04 | 4.50E-05 | 0        | 8.13E-04 | 0        | 0        |
| 0.001328 | 0.001278 | 4.62E-04 | 0.001002 | 0.003215 | 0.001079 | 0.001285 | 0.001385 | 5.42E-04 | 0.001789 | 0.001198 | 2.25E-04 | 0.002765 | 0.001469 | 0.00141  |
| 0        | 0        | 4.48E-04 | 0        | 0        | 1.18E-04 | 6.00E-05 | 0        | 5.15E-04 | 0        | 4.70E-05 | 0        | 6.40E-05 | 4.70E-05 | 0        |
| 0        | 2.10E-05 | 7.30E-05 | 5.80E-05 | 3.60E-05 | 2.80E-05 | 5.50E-05 | 2.90E-05 | 0        | 1.33E-04 | 0        | 0        | 0        | 4.70E-05 | 0        |
| 0        | 0.001066 | 0        | 4.70E-05 | 0        | 0        | 1.02E-04 | 0        | 0        | 7.50E-05 | 0        | 0        | 4.19E-04 | 0        | 0        |
| 0        | 6.00E-06 | 3.06E-04 | 0        | 0        | 0        | 0        | 5.80E-05 | 0        | 0        | 0        | 0        | 6.10E-05 | 0        | 0        |
| 0        | 0        | 0        | 0        | 0        | 0        | 0        | 0        | 1.87E-04 | 0        | 0        | 1.91E-04 | 0        | 0        | 0        |
| 0        | 0        | 0        | 0        | 0        | 0        | 0        | 0        | 0        | 0        | 0        | 0        | 0        | 0        | 0        |

| HC62     | HC28     | HC65     | HC69     | HC49     | HC29     | HC34     | HC36     | HC03     | HC48     | HC22     | HC40     | HC47     | HC60     | HC71     |
|----------|----------|----------|----------|----------|----------|----------|----------|----------|----------|----------|----------|----------|----------|----------|
| 0.640252 | 0.634712 | 0.631874 | 0.616404 | 0.611667 | 0.609192 | 0.600763 | 0.587747 | 0.582139 | 0.53721  | 0.533961 | 0.527657 | 0.526387 | 0.525245 | 0.523196 |
| 0.330342 | 0.349265 | 0.309602 | 0.36859  | 0.37565  | 0.379243 | 0.37429  | 0.335612 | 0.369007 | 0.195008 | 0.046175 | 0.468487 | 0.337565 | 0.443262 | 0.451988 |
| 0.016523 | 0.00492  | 0.032269 | 0.006979 | 0.005181 | 0.002654 | 0.010619 | 0.003251 | 0.013179 | 0.264127 | 0.41895  | 0.001223 | 0.018282 | 0.026089 | 0.021032 |
| 0.004615 | 0.007666 | 0.02205  | 0.001732 | 0.003236 | 0.006821 | 0.003392 | 0.07147  | 0.033229 | 5.10E-05 | 2.71E-04 | 9.10E-04 | 0.11525  | 0.00296  | 9.19E-04 |
| 0.003832 | 0        | 0        | 0        | 0        | 0        | 0        | 0        | 0        | 0        | 0        | 2.52E-04 | 0        | 0        | 0        |
| 0.001075 | 0.003437 | 0.002868 | 0.003771 | 0.004266 | 0.002063 | 0.004674 | 0.00192  | 0.002343 | 0.003278 | 6.43E-04 | 0.001471 | 0.002399 | 2.15E-04 | 0.002051 |
| 0        | 0        | 1.95E-04 | 0        | 0        | 0        | 0.006262 | 0        | 0        | 3.03E-04 | 0        | 0        | 0        | 0        | 0        |
| 0        | 0        | 2.60E-05 | 0        | 0        | 0        | 0        | 0        | 1.03E-04 | 2.30E-05 | 0        | 0        | 0        | 0        | 3.80E-05 |
| 0.00327  | 0        | 0        | 2.81E-04 | 0        | 0        | 0        | 0        | 0        | 0        | 0        | 0        | 1.17E-04 | 0.001363 | 5.71E-04 |
| 0        | 0        | 0        | 0.002215 | 0        | 2.70E-05 | 0        | 0        | 0        | 0        | 0        | 0        | 0        | 0        | 0        |
| 9.10E-05 | 0        | 0.001116 | 2.80E-05 | 0        | 0        | 0        | 0        | 0        | 0        | 0        | 0        | 0        | 0        | 2.05E-04 |
| 0        | 0        | 0        | 0        | 0        | 0        | 0        | 0        | 0        | 0        | 0        | 0        | 0        | 8.66E-04 | 0        |

| HC55     | HC17     | HC38     | HC51     | HC04     | HC30     | HC23     | HC01     | HC16     | HC56     | HC31     | HC37     | HC32     | HC05     | HC26     |
|----------|----------|----------|----------|----------|----------|----------|----------|----------|----------|----------|----------|----------|----------|----------|
| 0.522654 | 0.522459 | 0.450839 | 0.428844 | 0.405925 | 0.395532 | 0.378752 | 0.375352 | 0.348497 | 0.339797 | 0.297857 | 0.281104 | 0.267388 | 0.254654 | 0.237254 |
| 0.461417 | 0.446172 | 0.541604 | 0.555643 | 0.33677  | 0.563356 | 0.602586 | 0.607387 | 0.61648  | 0.64062  | 0.681975 | 0.706216 | 0.701712 | 0.24379  | 0.719268 |
| 0.013315 | 0.021623 | 0.00239  | 0.008907 | 0.253592 | 0.033297 | 0.017744 | 0.011858 | 0.022326 | 0.014713 | 0.015765 | 0.009217 | 0.02808  | 0.500442 | 0.037399 |
| 6.22E-04 | 0.008715 | 4.93E-04 | 0.003708 | 0.001333 | 0.003096 | 2.35E-04 | 7.66E-04 | 0.00896  | 6.21E-04 | 0.002159 | 7.70E-05 | 0.002549 | 1.08E-04 | 0.005508 |
| 0        | 0        | 3.40E-05 | 0        | 0        | 0.001834 | 0        | 0        | 0        | 0.001724 | 0        | 7.61E-04 | 9.30E-05 | 0        | 0        |
| 0.001992 | 8.67E-04 | 0.002729 | 9.22E-04 | 0.001651 | 0.002098 | 5.21E-04 | 0.001725 | 0.003623 | 0.001347 | 0.001695 | 0.002597 | 1.34E-04 | 8.00E-04 | 5.36E-04 |
| 0        | 1.64E-04 | 0        | 0        | 9.20E-05 | 0        | 4.60E-05 | 0.002882 | 1.14E-04 | 9.23E-04 | 5.49E-04 | 2.80E-05 | 0        | 1.59E-04 | 3.50E-05 |
| 0        | 0        | 0        | 0        | 6.37E-04 | 0        | 0        | 3.00E-05 | 0        | 2.80E-05 | 0        | 0        | 0        | 0        | 0        |
| 0        | 0        | 0        | 0.001914 | 0        | 0        | 3.90E-05 | 0        | 0        | 0        | 0        | 0        | 4.40E-05 | 0        | 0        |
| 0        | 0        | 0.001911 | 0        | 0        | 0        | 0        | 0        | 0        | 0        | 0        | 0        | 0        | 4.70E-05 | 0        |
| 0        | 0        | 0        | 6.20E-05 | 0        | 7.87E-04 | 0        | 0        | 0        | 0        | 0        | 0        | 0        | 0        | 0        |
| 0        | 0        | 0        | 0        | 0        | 0        | 7.70E-05 | 0        | 0        | 2.27E-04 | 0        | 0        | 0        | 0        | 0        |

Table S23. The different degree of genus level (p value) between the healthy controls (n=48) and CP (n=24) in the discovery cohort.

| ID                                   | CP-median                | CP-mean     | CP-se       | HC-median                | HC-mean     | HC-se       |
|--------------------------------------|--------------------------|-------------|-------------|--------------------------|-------------|-------------|
| Bacteroides                          | 0.0216(0.0029,0.1375)    | 0.118425167 | 0.037736009 | 0.2887(0.1522,0.3729)    | 0.286085292 | 0.026717137 |
| Faecalibacterium                     | <0.0001(<0.0001,0.0024)  | 0.028460667 | 0.014281838 | 0.1188(0.0719,0.1723)    | 0.139713104 | 0.014421282 |
| Lachnospiraceae_incertae_sedis       | 0.0145(0.0007,0.0969)    | 0.076415    | 0.029184436 | 0.0594(0.0367,0.087)     | 0.072642521 | 0.007102443 |
| Blautia                              | 0.0073(0.0003,0.0353)    | 0.021103458 | 0.007050771 | 0.0515(0.0328,0.0784)    | 0.058371521 | 0.005691217 |
| Akkermansia                          | <0.0001(<0.0001,0.0072)  | 0.086333167 | 0.051306909 | <0.0001(<0.0001,<0.0001) | 0.000206292 | 9.47E-05    |
| Streptococcus                        | 0.0026(0.0002,0.0407)    | 0.083695292 | 0.035950032 | 0.0005(0.0001,0.0009)    | 0.001217271 | 0.000366503 |
| Ruminococcaceae_uncultured           | 0.0009(0.0002,0.0063)    | 0.007080542 | 0.002776668 | 0.0123(0.0043,0.0271)    | 0.037268167 | 0.009784261 |
| Pseudobutyrvibrio                    | <0.0001(<0.0001,0.0006)  | 0.009504708 | 0.004917775 | 0.0184(0.0125,0.0368)    | 0.028828875 | 0.003618662 |
| Roseburia                            | 0.0002(<0.0001,0.0013)   | 0.005748    | 0.002911388 | 0.0192(0.0096,0.0301)    | 0.027201917 | 0.004941496 |
| Lachnospiraceae_unclassified         | 0.0015(0.0002,0.0093)    | 0.006679208 | 0.002033767 | 0.0239(0.0151,0.0329)    | 0.025978563 | 0.002207857 |
| Bifidobacterium                      | <0.0001(<0.0001,0.0002)  | 0.025866125 | 0.023711616 | 0.0027(0.0006,0.0069)    | 0.010094188 | 0.003364671 |
| Enterococcus                         | <0.0001(<0.0001,0.0008)  | 0.042418625 | 0.040822599 | <0.0001(<0.0001,<0.0001) | 0.000181229 | 0.000144809 |
| Alistipes                            | 0.0002(<0.0001,0.0028)   | 0.002955167 | 0.00159843  | 0.0039(0.0007,0.0145)    | 0.014260271 | 0.003833628 |
| Lachnospira                          | <0.0001(<0.0001,<0.0001) | 0.000288125 | 0.000272129 | 0.0063(0.0021,0.0131)    | 0.015297917 | 0.003842222 |
| Ruminococcus                         | <0.0001(<0.0001,0.0004)  | 0.002327917 | 0.00128221  | 0.0074(0.0027,0.0178)    | 0.013032646 | 0.002306769 |
| Ruminococcaceae_unclassified         | <0.0001(<0.0001,0.0005)  | 0.008015917 | 0.004291893 | 0.0084(0.0048,0.0128)    | 0.0097285   | 0.001133361 |
| Actinomyces                          | 0.0003(<0.0001,0.0019)   | 0.024222833 | 0.014133014 | <0.0001(<0.0001,<0.0001) | 6.88E-05    | 1.80E-05    |
| Anaerostipes                         | <0.0001(<0.0001,0.0004)  | 0.009843958 | 0.008091244 | 0.004(0.0012,0.0121)     | 0.007130792 | 0.001178878 |
| Lachnospiraceae_uncultured           | <0.0001(<0.0001,0.0018)  | 0.001989958 | 0.000805623 | 0.0076(0.0035,0.0127)    | 0.010542354 | 0.001720812 |
| Clostridium_sensu_stricto_1          | <0.0001(<0.0001,<0.0001) | 0.0055896   | 0.004145739 | 0.0013(0.0002,0.0041)    | 0.007937667 | 0.003573905 |
| Rothia                               | 0.0002(<0.0001,0.0019)   | 0.021481333 | 0.014859224 | <0.0001(<0.0001,<0.0001) | 2.96E-05    | 1.02E-05    |
| Coprococcus                          | <0.0001(<0.0001,0.001)   | 0.003239125 | 0.002152304 | 0.0015(0.0008,0.0055)    | 0.007219792 | 0.001808455 |
| Erysipelotrichaceae_incertae_sedis   | 0.0018(0.0001,0.0056)    | 0.01507125  | 0.006909902 | 0.0001(<0.0001,0.0006)   | 0.000688729 | 0.000239559 |
| Peptostreptococcaceae_incertae_sedis | <0.0001(<0.0001,0.0022)  | 0.00512575  | 0.002476623 | 0.0029(0.0012,0.006)     | 0.004916625 | 0.001084803 |
| Dialister                            | <0.0001(<0.0001,<0.0001) | 0.00012575  | 8.86E-05    | 0.0003(<0.0001,0.0069)   | 0.006068125 | 0.001874499 |
| Ruminococcaceae_incertae_sedis       | 0.0003(<0.0001,0.0033)   | 0.0052715   | 0.002638231 | 0.0026(0.0014,0.0039)    | 0.003260896 | 0.000446268 |
| Parabacteroides                      | 0.0001(<0.0001,0.0015)   | 0.00170425  | 0.000664279 | 0.0025(0.001,0.0075)     | 0.004620021 | 0.000694035 |
| Veillonella                          | 0.0007(<0.0001,0.0048)   | 0.005938458 | 0.00230505  | 0.0001(<0.0001,0.0004)   | 0.002410833 | 0.001754839 |
| Parasutterella                       | <0.0001(<0.0001,<0.0001) | 0.001262333 | 0.001180595 | 0.0013(<0.0001,0.006)    | 0.004002042 | 0.000822103 |
| Dorea                                | <0.0001(<0.0001,0.0019)  | 0.001374875 | 0.000479747 | 0.0025(0.0014,0.0056)    | 0.003783604 | 0.000500721 |
| Halomonas                            | 0.0021(0.0007,0.0052)    | 0.008499292 | 0.005678819 | <0.0001(<0.0001,<0.0001) | 0           | 0           |
| Klebsiella                           | <0.0001(<0.0001,<0.0001) | 7.58E-06    | 6.02E-06    | <0.0001(<0.0001,0.0006)  | 0.004234688 | 0.001992144 |
| Erysipelotrichaceae_uncultured       | <0.0001(<0.0001,<0.0001) | 0.00049275  | 0.000269361 | 0.0019(0.0004,0.0038)    | 0.002672188 | 0.00043319  |
| Christensenellaceae_uncultured       | <0.0001(<0.0001,<0.0001) | 0.000007625 | 0.000007625 | <0.0001(<0.0001,0.0031)  | 0.002433708 | 0.000650475 |
| Sutterella                           | <0.0001(<0.0001,<0.0001) | 0.000186    | 0.000137845 | 0.0003(<0.0001,0.0013)   | 0.001907792 | 0.000547027 |
| Firmicutes_unclassified              | <0.0001(<0.0001,<0.0001) | 0.000230208 | 0.000170397 | 0.0004(<0.0001,0.0026)   | 0.001862604 | 0.000433463 |
| Barnesiella                          | <0.0001(<0.0001,<0.0001) | 0.000212208 | 0.000190328 | <0.0001(<0.0001,0.0005)  | 0.001797646 | 0.001036194 |
| Enterobacteriaceae_unclassified      | <0.0001(<0.0001,<0.0001) | 2.31E-05    | 1.57E-05    | <0.0001(<0.0001,0.0003)  | 0.001825979 | 0.000792136 |
| Defluviitaleaceae_incertae_sedis     | <0.0001(<0.0001,<0.0001) | 1.87E-05    | 1.34E-05    | 0.0005(0.0001,0.0021)    | 0.001767208 | 0.000396535 |
| Peptostreptococcus                   | <0.0001(<0.0001,<0.0001) | 0.003043125 | 0.002625181 | <0.0001(<0.0001,<0.0001) | 3.04E-06    | 1.58E-06    |
| Flavonifractor                       | <0.0001(<0.0001,0.0007)  | 0.001420208 | 0.000668827 | 0.0003(<0.0001,0.0009)   | 0.000675792 | 0.000145376 |
| Bacteroidales_unclassified           | <0.0001(<0.0001,<0.0001) | 0.000101875 | 8.34E-05    | 0.0002(<0.0001,0.0009)   | 0.001130271 | 0.000471962 |
| Atopobium                            | <0.0001(<0.0001,0.0002)  | 0.001966167 | 0.0015136   | <0.0001(<0.0001,<0.0001) | 7.96E-06    | 2.48E-06    |
| Haemophilus                          | <0.0001(<0.0001,<0.0001) | 0.000593625 | 0.000432934 | <0.0001(<0.0001,0.0004)  | 0.000650167 | 0.000290608 |
| Odoribacter                          | <0.0001(<0.0001,<0.0001) | 5.87E-05    | 3.77E-05    | 0.0002(<0.0001,0.0005)   | 0.0007955   | 0.000390069 |
| Granulicatella                       | <0.0001(<0.0001,0.0002)  | 0.001231167 | 0.000607777 | <0.0001(<0.0001,<0.0001) | 7.40E-06    | 3.03E-06    |
| Solobacterium                        | <0.0001(<0.0001,0.0002)  | 0.000941167 | 0.000758332 | <0.0001(<0.0001,<0.0001) | 7.69E-06    | 2.85E-06    |
| Candidate_division_TM7_norank        | <0.0001(<0.0001,0.0004)  | 0.000816375 | 0.000491432 | <0.0001(<0.0001,<0.0001) | 3.18E-05    | 1.39E-05    |
| Pelagibacterium                      | 0.0002(<0.0001,0.0006)   | 0.000874    | 0.000470668 | <0.0001(<0.0001,<0.0001) | 0           | 0           |

Table S23. The different degree of phylum level (p value) between the healthy controls (n=48) and CP (n=24) in the discovery cohort.

| ID                     | CP-median                | CP-mean     | CP-se       | HC-median                | HC-mean     | HC-se       |
|------------------------|--------------------------|-------------|-------------|--------------------------|-------------|-------------|
| Firmicutes             | 0.5075(0.3794,0.8655)    | 0.5719915   | 0.060288165 | 0.605(0.4453,0.6737)     | 0.568945375 | 0.024147979 |
| Bacteroidetes          | 0.027(0.0039,0.1871)     | 0.144968042 | 0.041952257 | 0.3362(0.2699,0.4632)    | 0.373481063 | 0.02485225  |
| Proteobacteria         | 0.011(0.0061,0.0892)     | 0.11982125  | 0.044320212 | 0.0132(0.0055,0.0233)    | 0.043843896 | 0.014665811 |
| Actinobacteria         | 0.0018(0.0009,0.017)     | 0.074784042 | 0.033920563 | 0.0032(0.0009,0.0077)    | 0.011040125 | 0.003463112 |
| Verrucomicrobia        | <0.0001(<0.0001,0.0072)  | 0.086333167 | 0.051306909 | <0.0001(<0.0001,<0.0001) | 0.000223229 | 9.54141E-05 |
| Bacteria_unclassified  | 0.0002(<0.0001,0.0005)   | 0.00033425  | 0.00010456  | 0.0016(0.001,0.0024)     | 0.001775    | 0.000158415 |
| Fusobacteria           | <0.0001(<0.0001,0.0005)  | 0.000767708 | 0.000432174 | <0.0001(<0.0001,0.0001)  | 0.000287083 | 0.000142398 |
| Candidate_division_TM7 | <0.0001(<0.0001,0.0004)  | 0.000816375 | 0.000491432 | <0.0001(<0.0001,<0.0001) | 3.18333E-05 | 1.38638E-05 |
| Tenericutes            | <0.0001(<0.0001,<0.0001) | 0           | 0           | <0.0001(<0.0001,<0.0001) | 0.000193917 | 8.46389E-05 |
| Cyanobacteria          | <0.0001(<0.0001,<0.0001) | 0.000132417 | 6.65559E-05 | <0.0001(<0.0001,<0.0001) | 9.64792E-05 | 6.03442E-05 |
| Synergistetes          | <0.0001(<0.0001,<0.0001) | 0.00005125  | 4.78454E-05 | <0.0001(<0.0001,<0.0001) | 0.000057625 | 2.85507E-05 |
| Lentisphaerae          | <0.0001(<0.0001,<0.0001) | 0           | 0           | <0.0001(<0.0001,<0.0001) | 0.000024375 | 1.8581E-05  |

| p-value  | z-score      | Sig_mark | q-value  |
|----------|--------------|----------|----------|
| 1.53E-05 | -4.324346247 | ***      | 4.66E-05 |
| 7.18E-08 | -5.386672997 | ***      | 9.47E-07 |
| 0.00598  | -2.748874852 | **       | 0.009179 |
| 4.64E-07 | -5.040687815 | ***      | 3.40E-06 |
| 1.72E-04 | -3.756709387 | ***      | 3.55E-04 |
| 0.005185 | -2.795283067 | **       | 0.008149 |
| 2.29E-04 | -3.685204673 | ***      | 4.57E-04 |
| 4.66E-06 | -4.57956883  | ***      | 1.92E-05 |
| 1.04E-06 | -4.884474848 | ***      | 6.15E-06 |
| 1.10E-07 | -5.310184796 | ***      | 1.20E-06 |
| 1.95E-05 | -4.271073724 | ***      | 5.35E-05 |
| 0.008561 | -2.629092543 | **       | 0.012842 |
| 5.98E-04 | -3.432433722 | ***      | 0.001128 |
| 4.50E-10 | -6.235567243 | ***      | 9.90E-09 |
| 7.83E-05 | -3.94939419  | ***      | 2.07E-04 |
| 6.50E-06 | -4.509461054 | ***      | 2.38E-05 |
| 1.14E-05 | -4.38842487  | ***      | 3.77E-05 |
| 6.06E-06 | -4.52441369  | ***      | 2.35E-05 |
| 3.37E-07 | -5.101552094 | ***      | 3.14E-06 |
| 1.14E-05 | -4.388625309 | ***      | 3.77E-05 |
| 3.80E-07 | -5.078666943 | ***      | 3.14E-06 |
| 1.17E-04 | -3.85158212  | ***      | 2.65E-04 |
| 0.0019   | -3.105369444 | **       | 0.003059 |
| 0.001353 | -3.204502471 | **       | 0.00229  |
| 1.02E-04 | -3.884664135 | ***      | 2.60E-04 |
| 0.016857 | -2.389803358 | *        | 0.024724 |
| 6.99E-04 | -3.389810198 | ***      | 0.001282 |
| 0.029998 | -2.170116057 | *        | 0.042125 |
| 1.93E-05 | -4.272637154 | ***      | 5.35E-05 |
| 1.14E-04 | -3.859243029 | ***      | 2.65E-04 |
| 1.71E-15 | -7.960590582 | ***      | 1.13E-13 |
| 3.29E-04 | -3.591331727 | ***      | 6.39E-04 |
| 1.52E-06 | -4.808221104 | ***      | 7.73E-06 |
| 1.20E-04 | -3.845194753 | ***      | 2.65E-04 |
| 8.96E-04 | -3.321353478 | ***      | 0.001598 |
| 1.83E-06 | -4.771720126 | ***      | 8.61E-06 |
| 0.03471  | -2.111730841 | *        | 0.047142 |
| 0.001774 | -3.125667255 | **       | 0.002927 |
| 7.12E-10 | -6.163488824 | ***      | 1.17E-08 |
| 1.29E-04 | -3.82838923  | ***      | 2.75E-04 |
| 0.028003 | -2.197248143 | *        | 0.040178 |
| 4.17E-06 | -4.602476922 | ***      | 1.84E-05 |
| 1.55E-05 | -4.320806416 | ***      | 4.66E-05 |
| 0.035    | -2.108362075 | *        | 0.047142 |
| 0.001078 | -3.269224821 | **       | 0.001873 |
| 5.38E-07 | -5.012202965 | ***      | 3.55E-06 |
| 1.12E-06 | -4.869643466 | ***      | 6.15E-06 |
| 1.19E-04 | -3.847868932 | ***      | 2.65E-04 |
| 6.84E-14 | -7.490885022 | ***      | 2.26E-12 |
| p-value  | z-score      | Sig_mark | q-value  |
| 0.87281  | -0.160089863 |          | 0.876591 |
| 4.41E-06 | -4.590864726 | ***      | 2.65E-05 |
| 0.744293 | -0.326173095 |          | 0.876591 |
| 0.876591 | -0.155292255 |          | 0.876591 |
| 3.77E-04 | -3.555751399 | ***      | 0.001131 |
| 7.42E-09 | -5.78121069  | ***      | 8.90E-08 |
| 0.08589  | -1.717490751 |          | 0.147239 |
| 1.19E-04 | -3.847868932 | ***      | 4.77E-04 |
| 0.005612 | -2.769630063 | **       | 0.013469 |
| 0.027299 | -2.20721493  | *        | 0.054598 |
| 0.382793 | -0.872760763 |          | 0.510391 |
| 0.220657 | -1.224784225 |          | 0.330985 |

Table S24. The relative abundance and distribution of the key 40 OTUs in the discovery cohort (48 healthy controls and 24 CP).

|                                            | CP02        | CP34        | CP33        | CP30        | CP29        | CP28        | CP27        | CP26        |
|--------------------------------------------|-------------|-------------|-------------|-------------|-------------|-------------|-------------|-------------|
| OTU1601 (Clostridiales_unclassified)       | 0           | 0           | 0.035677635 | 0           | 0           | 0           | 0.001611277 | 0.001010091 |
| OTU829 (Phyllobacteriaceae_unclassified)   | 0.000155375 | 0.000345576 | 0           | 0.000718391 | 0.002096276 | 0.007030146 | 0.002158362 | 0.000969687 |
| OTU1741 (Halomonas)                        | 0.005909692 | 0.009703772 | 0.005960829 | 0.010735516 | 0.008159167 | 0.194190769 | 0.029328997 | 0.007484773 |
| OTU1314 (Pelagibacterium)                  | 0.000474302 | 0.000552921 | 0           | 0.001287724 | 0.004060198 | 0.015802051 | 0.00374341  | 0.000494944 |
| OTU41 (Xanthomonadaceae_uncultured)        | 0.000283491 | 0.000373222 | 0           | 0.000682527 | 0.003001365 | 0.005822694 | 0.002113396 | 0.000888888 |
| OTU1474 (Actinomyces)                      | 0.011950226 | 0.003718397 | 0.001790432 | 0.161840784 | 0.03722361  | 0.05882155  | 0.000726948 | 0.000474743 |
| OTU1597 (Streptococcus)                    | 0.112641234 | 0.020347511 | 0.41177755  | 0.524836597 | 0.131667008 | 0.436626315 | 8.99E-05    | 0.000151514 |
| OTU51 (Streptococcus)                      | 0.843619414 | 0.006510651 | 0.18024411  | 0.178215836 | 0.347148971 | 0.228267272 | 0.000723201 | 0           |
| OTU844 (Rothia)                            | 0.021130965 | 0.001741703 | 0.001310072 | 0.12141477  | 0.462544436 | 0.051948471 | 0.000187358 | 0.000212119 |
| OTU279 (Lachnospiraceae_unclassified)      | 0           | 0.006911519 | 0.003253346 | 0           | 0.000213906 | 1.82E-05    | 0.006126601 | 0.007666589 |
| OTU299 (Lachnospiraceae_Incertae_Sedis)    | 0           | 0.013187178 | 0.081530164 | 0           | 8.02E-05    | 0           | 0.000944284 | 0.000646458 |
| OTU1000 (Blautia)                          | 0.000338008 | 0.054103369 | 0.032991987 | 0           | 6.42E-05    | 0           | 0.009982426 | 0.000292926 |
| OTU470 (Blautia)                           | 0           | 0.020057227 | 0.002205288 | 0           | 0           | 0           | 0.000749431 | 0           |
| OTU1167 (Anaerostipes)                     | 6.27E-05    | 0           | 0           | 0           | 0.000635033 | 7.57E-05    | 0.05893903  | 0.025333077 |
| OTU1517 (Blautia)                          | 0           | 0.00951025  | 0.001004389 | 0           | 2.81E-05    | 0           | 0.006104119 | 0.006131251 |
| OTU685 (Erysipelotrichaceae_uncultured)    | 0           | 0           | 0           | 0           | 5.21E-05    | 0           | 0           | 0           |
| OTU239 (Lachnospiraceae_Incertae_Sedis)    | 7.63E-05    | 0.001313189 | 0           | 0           | 0.000339575 | 0           | 6.37E-05    | 0           |
| OTU1716 (Lachnospiraceae_Incertae_Sedis)   | 0           | 0           | 0           | 0           | 0.000100268 | 0           | 0           | 0           |
| OTU89 (Pseudobutyrvibrio)                  | 0.000504286 | 0           | 0.010000218 | 0           | 0.000590915 | 0.000213162 | 0.172039465 | 0.474076019 |
| OTU346 (Lachnospiraceae_uncultured)        | 0           | 0           | 0           | 0           | 0           | 0           | 6.74E-05    | 0.003212089 |
| OTU469 (Lachnospiraceae_Incertae_Sedis)    | 0           | 0           | 0           | 0           | 0.000171125 | 2.24E-05    | 0           | 0.038080423 |
| OTU328 (Lachnospiraceae_Incertae_Sedis)    | 0           | 0           | 0           | 0           | 0           | 0           | 0           | 0.007656488 |
| OTU289 (Blautia)                           | 0           | 0.04218791  | 0           | 0           | 2.54E-05    | 0           | 0.000157381 | 0.000191917 |
| OTU752 (Dorea)                             | 0           | 0.047178027 | 0           | 0           | 7.89E-05    | 0           | 0.002409422 | 0.00366663  |
| OTU1393 (Lachnospiraceae_unclassified)     | 0           | 0.191366131 | 0.057927029 | 0           | 2.41E-05    | 0.000178103 | 0.000239818 | 0.030393632 |
| OTU1439 (Lachnospiraceae_uncultured)       | 0           | 0.026291417 | 0.003777375 | 0           | 0.000113637 | 7.29E-05    | 0           | 0.036433975 |
| OTU1029 (Bifidobacterium)                  | 0           | 0           | 0           | 0           | 2.67E-05    | 0           | 0           | 0           |
| OTU64 (Faecalibacterium)                   | 0.000196263 | 0           | 0           | 0           | 0.000264708 | 0.000200541 | 0.229104917 | 0.089090009 |
| OTU1126 (Ruminococcaceae_unclassified)     | 0.00020444  | 0           | 0           | 0           | 6.42E-05    | 0.0001178   | 0.257174869 | 0.03102999  |
| OTU452 (Faecalibacterium)                  | 0           | 0           | 0           | 0           | 2.14E-05    | 4.91E-05    | 0.210680146 | 0.013030171 |
| OTU1168 (Peptostreptococcaceae_Incertae_S  | 0.002036227 | 0.544212985 | 0.001048058 | 0           | 0.000149734 | 1.96E-05    | 0.000318508 | 0           |
| OTU1639 (Clostridium_sensu_stricto_1)      | 0           | 0           | 0           | 0           | 0           | 0           | 0           | 0           |
| OTU622 (Lachnospira)                       | 0           | 0           | 0           | 0           | 0           | 0           | 0           | 0           |
| OTU1145 (Lachnospira)                      | 0.000335282 | 0           | 0.001288238 | 0           | 0           | 0           | 0           | 0           |
| OTU1633 (Lachnospiraceae_unclassified)     | 0           | 0           | 0           | 0           | 0           | 0           | 0           | 0           |
| OTU1250 (Roseburia)                        | 0           | 0           | 0.159326623 | 0.000267856 | 0.000915784 | 0.000490834 | 0           | 0.027464369 |
| OTU1153 (Roseburia)                        | 8.18E-05    | 0.000387045 | 0.001179065 | 0           | 0.000139039 | 3.23E-05    | 0.004215551 | 0.192604115 |
| OTU715 (Roseburia)                         | 0           | 0           | 0.000895216 | 0           | 0           | 0           | 0           | 0.001313118 |
| OTU613 (Klebsiella)                        | 0           | 0           | 0           | 0           | 0           | 0           | 0           | 0           |
| OTU1071 (Defluviitaleaceae_Incertae_Sedis) | 0           | 0           | 0.006812376 | 0           | 0           | 0           | 0           | 0           |

| CP24        | CP22        | CP19        | CP18        | CP36        | CP15        | CP14        | CP13        | CP12        | CP11        | CP10        |             |
|-------------|-------------|-------------|-------------|-------------|-------------|-------------|-------------|-------------|-------------|-------------|-------------|
|             | 0           | 0.001162085 | 0.048131729 | 0           | 0           | 0           | 0.000114395 | 0.529384328 | 0.080809068 | 0.035429936 | 0           |
|             | 0           | 0.002870523 | 0.044965168 | 0.007092863 | 0.002073607 | 0.004241915 | 0           | 0.024953358 | 0.036837991 | 0           | 0.00039607  |
|             | 0           | 0.053169716 | 0.316022799 | 0.089488814 | 0.022403444 | 0.061219111 | 0.001084153 | 0.255597015 | 0.481434434 | 0.021098726 | 0.008203214 |
|             | 0           | 0.00354696  | 0.085972134 | 0.011342332 | 0.002449524 | 0.007228825 | 0.000129994 | 0.007695896 | 0.050517882 | 0           | 0.001203443 |
|             | 0           | 0.003572977 | 0.035148828 | 0.000906137 | 0.000770024 | 0.001970357 | 0           | 0.025419776 | 0.026089506 | 0           | 0.000693122 |
| 0.031549644 | 0           | 0.009816339 | 0.00199975  | 0           | 0.007981828 | 0.000278188 | 0           | 0.133476646 |             | 0           | 0           |
| 0.019795855 | 0.000364236 | 0.065706143 | 0.259373828 | 0.027096344 | 0.665553896 | 0.030933464 | 0.025186567 | 0.061852648 |             | 0           | 0.000495087 |
| 0.879987628 | 0.000286185 | 0.184610513 | 0.566022997 | 0.007263688 | 0.108319424 | 0.012716051 | 0.010261194 | 0.049736174 |             | 0           | 0           |
| 0.058768945 | 0.000208135 | 0.146453452 | 0.053899513 | 0.01199903  | 0.105771765 | 0.001796522 | 0.040578358 | 0.0036154   |             | 0           | 0           |
|             | 0           | 0.000121412 | 0.036098797 | 0           | 0.035366519 | 0           | 0.002152707 | 0           | 0           | 0           | 0           |
|             | 0           | 0           | 0           | 0           | 0.005578124 | 0           | 0.013628611 | 0           | 0.005374243 | 0.071257962 | 0.004379618 |
|             | 0           | 0.044809644 | 0.002691577 | 0.00199975  | 0.006608864 | 0           | 0.010901329 | 0           | 0.005471956 | 0.404458599 | 0           |
|             | 0           | 0           | 0           | 0           | 0.000757897 | 0           | 0.003621644 | 0           | 0           | 0.056130573 | 0           |
|             | 0           | 0.000433614 | 0           | 0.000812398 | 0.131898381 | 0           | 0.50253489  | 0.007695896 | 0.006644518 | 0.036624204 | 0           |
|             | 0           | 0           | 0           | 0           | 0.011580671 | 0           | 0.002701283 | 0           | 0           | 0.05294586  | 0.000243735 |
|             | 0           | 0           | 0           | 0           | 0.018571515 | 0           | 0           | 0           | 0           | 0           | 0           |
|             | 0           | 0.000199462 | 0           | 0           | 0.113751288 | 0           | 0           | 0           | 0           | 0           | 0           |
|             | 0           | 0           | 0           | 0.000874891 | 0.023561511 | 0           | 0           | 0           | 0           | 0           | 0           |
| 0.009897928 | 0.046249241 | 0.003641545 | 0           | 0.14967562  | 0.000313751 | 0.267239855 | 0           | 0.006742232 |             | 0           | 0.000258969 |
|             | 0           | 0           | 0           | 0           | 0.000284969 | 0           | 0.001050355 | 0           | 0           | 0           | 0           |
|             | 0           | 0.000398925 | 0           | 0           | 0.033971988 | 0           | 0           | 0           | 0           | 0           | 0           |
|             | 0           | 0           | 0           | 0           | 0.012459831 | 0           | 0           | 0           | 0           | 0           | 0           |
|             | 0           | 0           | 0           | 0           | 0.005826714 | 0           | 0.003829635 | 0.040578358 | 0           | 0           | 0.000159951 |
|             | 0           | 0           | 0           | 0           | 0.017055721 | 0           | 0.004718796 | 0           | 0           | 0           | 0           |
|             | 0           | 0.000164773 | 0           | 0           | 0.06754987  | 0           | 0.017159259 | 0           | 0.022180965 | 0           | 0.000936857 |
|             | 0           | 0           | 0           | 0           | 0.049572546 | 0           | 0.010451548 | 0           | 0.003713113 | 0           | 0.00041892  |
|             | 0           | 0           | 0.004749842 | 0           | 0           | 0           | 0           | 0           | 0           | 0           | 0.014296595 |
|             | 0           | 0.395169543 | 0.015991134 | 0           | 0.006839265 | 0           | 0.000122195 | 0           | 0           | 0.261544586 | 0.375344657 |
|             | 0           | 0.312713555 | 0           | 0           | 0.00013339  | 0           | 0           | 0           | 0           | 0.026671975 | 0.464970676 |
|             | 0           | 0.0696904   | 0           | 0           | 0.000200085 | 0           | 0           | 0           | 0           | 0.011942675 | 0.126917511 |
|             | 0           | 0.046899662 | 0           | 0           | 0           | 0           | 0           | 0           | 0           | 0           | 0.000754056 |
|             | 0           | 0           | 0           | 0.001031121 | 0           | 0.036583376 | 0           | 0           | 0           | 0           | 0           |
|             | 0           | 0           | 0           | 0.004030746 | 0           | 0           | 0.002490692 | 0           | 0           | 0           | 0           |
|             | 0           | 0           | 0           | 0.001124859 | 0           | 0           | 0.014522973 | 0           | 0.002345124 | 0           | 0           |
|             | 0           | 0           | 0           | 0           | 0           | 0           | 0.00209291  | 0           | 0           | 0           | 0           |
|             | 0           | 0.000407597 | 0           | 0           | 0.213648214 | 0           | 0.017689636 | 0           | 0.020617549 | 0           | 0           |
|             | 0           | 0.017561356 | 0           | 0           | 0.020760323 | 0           | 0.075076957 | 0           | 0           | 0.021894904 | 0.000327519 |
|             | 0           | 0           | 0           | 0           | 0.000291033 | 0.000288651 | 0.000961958 | 0           | 0           | 0           | 0           |
|             | 0           | 0           | 0           | 0           | 0           | 0.000527102 | 0           | 0.032649254 | 0           | 0           | 0           |
|             | 0           | 0           | 0           | 0           | 0           | 0           | 0           | 0           | 0.002540551 | 0           | 0           |

| CP07        | CP05        | CP04        | CP03        | CP17        | HC49        | HC48        | HC47        | HC37        | HC41        | HC40        |
|-------------|-------------|-------------|-------------|-------------|-------------|-------------|-------------|-------------|-------------|-------------|
| 0           | 0.01909486  | 0.044005784 |             | 0           | 0           | 0           | 0           | 0           | 0           | 0           |
| 0.012503234 | 0.002150915 | 0.026152009 |             | 0           | 0.005936186 | 0           | 0           | 0           | 0           | 0           |
| 0.203673364 | 0.026601115 | 0.41346577  | 0.173416407 | 0.136655949 |             | 0           | 0           | 0           | 0           | 0           |
| 0.018453048 | 0.002853255 | 0.049789401 | 0.0192108   | 0.012243384 |             | 0           | 0           | 0           | 0           | 0           |
| 0.012244546 | 0.002238708 | 0.017350852 | 0.016614746 | 0.007791244 |             | 0           | 0           | 0           | 0           | 0           |
| 0.005777356 | 0.001711953 | 0.136355064 |             | 0           | 0.015211477 | 0           | 0           | 0.001924634 | 0           | 0           |
| 0.003018022 | 0.005399236 | 0.088325894 | 0.079958463 | 0.188350235 | 0.000233563 | 9.76E-05    | 0.001020995 |             | 0           | 0.000176044 |
| 0.007846857 | 0.003775076 | 0.066574464 | 0.033748702 | 0.14605491  | 0.000125497 | 5.82E-05    | 0.000915375 |             | 0           | 0.000384095 |
| 0.001724584 | 0.002502085 | 0.034135915 |             | 0           | 0.126885976 | 0           | 0.000105948 | 0           | 0           | 0.000140035 |
| 0.731999655 |             | 0           | 0.113597787 |             | 0           | 0.079643829 | 0.002534337 | 0           | 0.006865311 | 0.00018342  |
| 0           |             | 0           | 0.001697366 | 0.01973001  | 0.004699481 | 0.01024193  | 4.36E-05    | 0.010233421 | 0.000140622 | 0.014715649 |
| 0.002759334 |             | 0           |             | 0           | 0.263170913 | 0.100951684 | 0.012493586 | 0.104646114 | 0.035173852 | 0.057046147 |
| 0           |             | 0           |             | 0           | 0.005565174 | 0.016806108 | 0.002636242 | 0.009388459 | 0.008761364 | 0.009778425 |
| 0           | 0.002150915 | 0.001823097 |             | 0           |             | 0           | 0.006808199 | 0.023343935 | 0.357442114 | 0.001357308 |
| 0           |             | 0           |             | 0           |             | 0           | 0.003806735 | 0.000388477 | 0.012146319 | 0.00012228  |
| 0           |             | 0           |             | 0           |             | 0           | 0.001370006 |             | 0           | 0.054241823 |
| 0           |             | 0           |             | 0           |             | 0           | 0.033622673 | 0.033718556 | 0.050509911 | 0.000189534 |
| 0           |             | 0           |             | 0           |             | 0           | 0.008010876 | 0.014334177 | 0.018694769 |             |
| 0           | 0.042930512 | 0.000942981 |             | 0           | 0.002473411 | 0.231297497 | 0.027982807 | 0.017415592 | 0.107410781 | 0.048672071 |
| 0           |             | 0           |             | 0           |             | 0           | 0.005249948 | 5.40E-05    | 0.00132612  | 0.001088292 |
| 0           | 0.000965717 |             | 0           |             | 0           | 0           | 0.001512933 | 0.01935114  | 0.001079673 | 0.062142713 |
| 0           |             | 0           |             | 0           |             | 0           | 0.000216133 | 0.009051306 |             | 0           |
| 0           |             | 0           | 0.001005846 |             | 0           | 0           | 0.010161751 | 0.001695172 | 0.010515074 | 0.000177306 |
| 0           |             | 0           |             | 0           | 0.003339105 | 0.00126194  | 0.000105948 | 0.016676251 | 0.00600395  | 0.001644408 |
| 0           | 0.027171766 |             | 0           |             | 0           | 0.001978729 | 0.026044063 | 0.000332387 | 0.058760019 | 0.037008052 |
| 0           | 0.001141302 |             | 0           |             | 0           | 0           | 0.010496409 | 4.36E-05    | 0.00673622  | 0.093446402 |
| 0           |             | 0           |             | 0           |             | 0           | 0.00124451  |             | 0           | 0.097593034 |
| 0           | 0.581054387 | 0.003646193 | 0.034267913 |             | 0           | 0.260782263 | 0.27432084  | 0.138174649 | 0.405670125 | 0.550500524 |
| 0           | 0.217900882 |             | 0           |             | 0           | 0.101356062 |             | 0           | 0.000328596 | 0.103577302 |
| 0           | 0.056318862 |             | 0           |             | 0           | 0.043536917 | 0.000303303 | 0.001678187 | 0.061280639 | 0.051980891 |
| 0           |             | 0           | 0.096053998 |             | 0           | 0.006759395 | 0.012260915 | 0.01665278  | 0.003405499 | 0.004673159 |
| 0           |             | 0           | 0.526998962 |             | 0           | 0.002475075 | 0.001155044 |             | 0           | 0.003244805 |
| 0           |             | 0           |             | 0           | 0           | 0.001003974 | 0.006282109 | 0.000457687 |             | 0           |
| 0           |             | 0           |             | 0           | 0           | 0.012406749 | 0.283816714 |             | 0           | 0.020577103 |
| 0           |             | 0           |             | 0           | 0           | 0.003587116 | 0.052758083 |             | 0           | 0.001884467 |
| 0           |             | 0           |             | 0           | 0           | 0.042170397 | 0.002490823 | 0.000375538 | 8.56E-05    | 0.010878698 |
| 0           | 0.004038453 |             | 0           |             | 0           | 0.040789932 | 0.049234783 | 0.002910422 | 0.019791023 | 0.016764158 |
| 0           |             | 0           |             | 0           | 0           | 0.002638918 | 0.006714212 | 0.000950581 |             | 0           |
| 0           |             | 0           |             | 0           | 0           |             | 0           | 0.144442806 | 0.000340332 | 0           |
| 0           |             | 0           | 0.001131577 |             | 0           | 0.010496409 | 0.020383616 |             | 0           | 0.024877873 |

| HC38        | HC51        | HC46        | HC52        | HC62        | HC55        | HC56        | HC58        | HC60         | HC63        | HC64        |             |
|-------------|-------------|-------------|-------------|-------------|-------------|-------------|-------------|--------------|-------------|-------------|-------------|
|             | 0           | 0           | 0           | 7.29E-05    | 0           | 0           | 0           | 0            | 0           | 0           | 0           |
|             | 0           | 0           | 0           | 0           | 0           | 0           | 0           | 0            | 0           | 0           | 0           |
|             | 0           | 0           | 0           | 0           | 0           | 0           | 0           | 0            | 0           | 0           | 0           |
|             | 0           | 0           | 0           | 0           | 0           | 0           | 0           | 0            | 0           | 0           | 0           |
|             | 0           | 0           | 0           | 0           | 0           | 0           | 0           | 0            | 0           | 0           | 0           |
|             | 0           | 0           | 0           | 0           | 0           | 0           | 0           | 0            | 0           | 0           | 0.00014763  |
|             | 0           | 0           | 0.002110002 | 9.72E-05    | 0           | 6.98E-05    | 0           | 0.001238186  | 0.001018293 | 0           | 0           |
|             | 0           | 0           | 0.005857105 | 7.02E-05    | 0.000210448 | 8.32E-05    | 0.000198866 | 0.001205167  | 0.00156716  | 0           | 0.000543548 |
|             | 0           | 0           | 0.000593833 | 9.18E-05    | 0           | 0           | 0           | 0.000313674  | 0           | 0           | 0.00014092  |
| 0.001796638 | 0.001691867 | 0.000117323 | 0.000609973 | 0.000515236 | 0.008701032 | 0.002065152 | 0.000412729 | 0.003011548  | 0.001491335 | 0.000157696 |             |
| 0.014614209 | 0.005958492 | 0.000837503 | 0.005756961 | 0.009753195 | 0.005388254 | 0.03806763  | 0.008873664 | 0.030722122  | 0.011355027 | 0.009320834 |             |
| 0.031658934 | 0.030042954 | 0.023296656 | 0.083242467 | 0.043911147 | 0.184953468 | 0.065824799 | 0.077394857 | 0.157849885  | 0.093235303 | 0.048533428 |             |
| 0.008469864 | 0.002447458 | 0.008248681 | 0.010410032 | 0.005544227 | 0.038293188 | 0.013132835 | 0.006768748 | 0.012479508  | 0.014814925 | 0.008924917 |             |
| 0.005012697 | 0.018458594 | 0.007647628 | 0.003317067 | 0.005493429 | 0.066534954 | 0.005399989 | 0.010730942 | 0.041107267  | 0.018388165 | 0.014169144 |             |
| 0.001936635 | 0.002209282 | 0.000317673 | 0.001951375 | 0.008287313 | 0.021004211 | 0.007419249 | 0.004564778 | 0.000678862  | 0.00178662  | 0.000325457 |             |
| 0.012315913 | 0.001609737 | 0.005969012 | 0.004620683 | 0.000442667 | 0.022673904 | 0.005476476 | 0.012794585 | 0.00480981   | 0.031523846 | 0.000456312 |             |
| 0.012280913 | 0.036210876 | 0.032678854 | 0.040441772 | 0.032771896 | 0.066558236 | 0.045731637 | 0.018952495 | 0.02210635   | 0.070763862 | 0.01823904  |             |
| 0.003243281 | 0.012955921 | 0.008199947 | 0.011694754 | 0.011596433 | 0.015276697 | 0.012582128 | 0.008634281 | 0.003220984  | 0.020141975 | 0.006878225 |             |
| 0.226178023 | 0.205812301 | 0.065074328 | 0.181113498 | 0.281420309 | 0.24058885  | 0.096450234 | 0.101844897 | 0.113868286  | 0.04324276  | 0.063564867 |             |
| 0.011674256 | 0.006697657 | 0.00072379  | 0.00102292  | 0.004782258 | 0.001639759 | 0.006654378 | 0           | 0.001263839  | 0.001246756 | 0.000352299 |             |
| 0.008275422 | 0.003465863 | 0.003788617 | 0.003603161 | 0.02256152  | 0.010267617 | 0           | 0.003326592 | 0.006990835  | 0.027022996 | 0.018812785 |             |
| 0.004950476 | 0.001145706 | 0.005228978 | 0.002755676 | 0.008403422 | 0.004307277 | 0           | 0.003078955 | 0.001704377  | 0.006454499 | 0.006458821 |             |
| 0.009014299 | 0.001934149 | 0.004017847 | 0.006264372 | 0.004760488 | 0.000791608 | 0           | 0.023129308 | 0.014978298  | 0.007477555 | 0.003549835 |             |
| 0.002990507 | 0.001802741 | 0.002041413 | 0.00207283  | 0.0120391   | 0.000741716 | 0.000191218 | 0.009154319 | 0.015202178  | 0.002248934 | 0.001043477 |             |
| 0.010250946 | 0.01162953  | 0.009694456 | 0.057037905 | 0.057684632 | 0.023997685 | 0.00936967  | 0.069437451 | 0.031595976  | 0.019709488 | 0.001238081 |             |
| 0.005584354 | 0.013543147 | 0.008006816 | 0.01197545  | 0.018250956 | 0.01831341  | 0.002914159 | 0.010351232 | 0.010349036  | 0.003289886 | 0.007673415 |             |
| 0.000120554 | 0.001084109 | 0.000321283 | 0.00104991  | 0           | 0           | 0.000252407 | 0           | 0            | 0.000700928 | 0.001496433 |             |
| 0.467732464 | 0.477418507 | 0.333425386 | 0.353789932 | 0.210600794 | 0.064386305 | 0.473011527 | 0.164447563 | 0.367618277  | 0.324589137 | 0.12361345  |             |
| 0.017344165 | 0.022088716 | 0.015255547 | 0.023586535 | 0.009114593 | 0.028677483 | 0.082430148 | 0.011482108 | 0.014530538  | 0.080890029 | 0.021600982 |             |
| 0.015563083 | 0.020487192 | 0.011022909 | 0.013060447 | 0.010783666 | 0.065899672 | 0.061036706 | 0.030244748 | 0.008081348  | 0.037247591 | 0.038766348 |             |
| 0.008858746 | 0.00592564  | 0.012024663 | 0.009557149 | 0.04569633  | 0           | 0           | 0.02232036  | 0.02650451   | 0.00031318  | 0.047583898 |             |
| 0.001536086 | 0.000377795 | 0.0036731   | 0.000313084 | 0.001901292 | 0.000133043 | 0           | 0.003128482 | 0.002195469  | 9.25E-05    | 0.005730736 |             |
| 0.007594878 | 0.00881249  | 0.007486986 | 0.000426442 | 0.039295796 | 0           | 0.014670226 | 0.008980973 | 0.00715694   | 0.009541564 | 0.058746754 |             |
| 0.017853601 | 0.015859197 | 0.038104572 | 0.011735239 | 0.065093867 | 0           | 0.020903925 | 0.036856659 | 0.031270989  | 0.039842515 | 0.298642473 |             |
| 0.003674941 | 0.001950574 | 0.002142491 | 0.002035044 | 0.009034768 | 0           | 0.003327189 | 0.002336044 | 0.000332209  | 0.004468041 | 0.006941975 |             |
| 0.018506924 | 0.011707553 | 0.260322583 | 0.092448746 | 0.040035994 | 0.017232433 | 0.000504815 | 0.334359652 | 0.019954213  | 0.00633221  | 0.048993095 |             |
| 0.068665005 | 0.062007737 | 0.115781152 | 0.05236864  | 0.035057801 | 0.090150139 | 0.032116933 | 0.013636551 | 0.043519395  | 0.109824917 | 0.108176029 |             |
| 0.00178886  | 0.005408224 | 0.004905889 | 0.002116014 | 0.001944833 | 0.003336061 | 0.000267705 | 0           | 0.0043111497 | 0.006884004 | 0.007445259 |             |
|             | 0           | 0.005276817 | 0.001082978 | 0.001865007 | 0           | 0           | 0           | 0            | 0           | 0.012498239 |             |
| 0.000513325 | 0.003979172 | 0           | 0.007424941 | 0.003011589 | 0           | 0           | 0           | 0            | 0.005079488 | 0.009233598 |             |

| HC65        | HC67        | HC68        | HC36        | HC54        | HC35        | HC17        | HC32        | HC01        | HC03        | HC04        |             |
|-------------|-------------|-------------|-------------|-------------|-------------|-------------|-------------|-------------|-------------|-------------|-------------|
| 0.000319405 |             | 0           | 0           | 0           | 0           | 0           | 0           | 0           | 0           | 0           | 0           |
|             | 0           | 0           | 0           | 0           | 0           | 0           | 0           | 0           | 0           | 0           | 0           |
|             | 0           | 0           | 0           | 0           | 0           | 0           | 0           | 0           | 0           | 0           | 0           |
|             | 0           | 0           | 0           | 0           | 0           | 0           | 0           | 0           | 0           | 0           | 0           |
|             | 0           | 0           | 0           | 0           | 0           | 0           | 0           | 0           | 0           | 0           | 0           |
|             | 0           | 0.000201364 |             | 0           | 0           | 0           | 0           | 0           | 0           | 0           | 9.43E-05    |
| 0.000251653 | 0.000491541 | 0.000198643 |             | 0           | 0.000132456 | 0.002526135 | 0.000113429 | 0.00188215  | 0           | 0           | 0.001711025 |
|             | 0           | 0           | 0.000108846 | 0.000359457 | 0.000243719 | 0.004809429 | 0.000178869 | 0.003385767 | 0.000399014 | 0           | 0.001955457 |
|             | 0           | 0           | 0           | 0           | 0           | 0.000778867 | 0           | 0.000504711 | 0           | 0           | 0.000782183 |
| 0.003668322 | 0.002940467 | 0.00527357  | 0.0067458   | 0.001721927 | 0.00459028  | 0.005025783 | 0.000941075 | 0.001853827 | 0.000968073 | 0.017504836 |             |
| 0.104348752 | 0.009326107 | 0.038000724 | 0.02570114  | 0.018840534 | 0.001359315 | 0.042439948 | 0.002029357 | 0.023739574 | 0.00055559  | 0.354842202 |             |
| 0.157437789 | 0.044778478 | 0.093245314 | 0.121799839 | 0.067706181 | 0.106026594 | 0.087968659 | 0.049782344 | 0.058093631 | 0.056813271 | 0.329187298 |             |
| 0.014876545 | 0.009826425 | 0.016362216 | 0.023308757 | 0.011057422 | 0.016966269 | 0.013916883 | 0.008637912 | 0.01057564  | 0.012158439 | 0.0295309   |             |
| 0.006988201 | 0.027315617 | 0.007902191 | 0.122111368 | 0.002468979 | 0.035371813 | 0.061735989 | 0.01912643  | 0.020332064 | 0.036464091 | 0           |             |
| 0.007220496 | 0.014474117 | 0.003153802 | 0.013811118 | 0.0036081   | 0.009162792 | 0.011142231 | 0.002470979 | 0.001744363 | 0.001837936 | 0           |             |
| 0.045074867 | 0.009589432 | 0.005507588 | 0.00738084  | 0.007274481 |             | 0           | 0.017018733 | 0           | 0.020724016 | 0.007275982 | 0           |
| 0.086636275 | 0.099032279 | 0.082567559 | 0.073105465 | 0.093021161 | 0.016830041 | 0.074073589 | 0.047511146 | 0.072341613 | 0.097194552 | 0.000237448 |             |
| 0.022890715 | 0.030743236 | 0.023328336 | 0.022358194 | 0.028801221 | 0.00553499  | 0.021734768 | 0.013606157 | 0.021278399 | 0.035829933 | 0           |             |
| 0.073918135 | 0.233310658 | 0.253300063 | 0.064534424 | 0.351591061 | 0.058669707 | 0.178515649 | 0.077762239 | 0.045540576 | 0.101406372 | 0.000118724 |             |
| 0.002729464 | 0.021812117 | 0.021630344 |             | 0.001430524 | 0.002967394 | 0.009074331 | 0.050013669 | 0.009389191 | 0.024516104 | 0           |             |
| 0.01390865  | 0.008878453 | 0.009738961 | 0.032650632 | 0.005335325 | 0.006272396 | 0.008258514 | 0.012307579 | 0.011373668 | 0.000185197 | 0.099815628 |             |
| 0.006572007 | 0.001768669 | 0.002557872 | 0.015005312 | 0.002389505 | 0.002283294 | 0.005859051 | 0.001645567 | 0.008467574 |             | 0           | 0.083079007 |
| 0.005168559 | 0.007004455 | 0.012830176 | 0.000738883 | 0.011629632 | 0.001003939 | 0.021237425 | 0.000783353 |             | 0           | 0.0011673   | 0.002919219 |
| 0.007530223 | 0.003146738 | 0.00453342  | 0.004161707 | 0.014813873 | 0.007030533 | 0.0071853   | 0.00295466  | 0.002810754 | 0.001057866 | 0           |             |
| 0.122951692 | 0.008176252 | 0.028571973 | 0.08980821  | 0.06389145  | 0.018195279 | 0.079553089 | 0.005977667 | 0.020911165 | 0.000159943 | 0.002074182 |             |
| 0.007994812 | 0.005191898 | 0.006555227 | 0.04217623  | 0.01608545  | 0.002638671 | 0.028592868 | 0.012870121 | 0.01929039  | 0.004570989 | 0           |             |
| 0.002632674 | 0.001303461 | 0.001219071 | 0.027118996 |             | 0           | 0.000929902 | 0.002844454 | 0.00133538  | 0.00022599  | 0.012405367 | 0           |
| 0.211001094 | 0.277356213 | 0.259863453 | 0.219779693 | 0.166089159 | 0.310308881 | 0.146144718 | 0.401308042 | 0.430176061 | 0.305305041 | 0.00713742  |             |
| 0.013850576 | 0.006517303 | 0.016239765 | 0.040287086 | 0.010416336 | 0.035798265 | 0.041244579 | 0.025840133 | 0.00462927  | 0.005286522 | 8.03E-05    |             |
| 0.030459653 | 0.010313577 | 0.013442433 | 0.018404173 | 0.004609467 | 0.016006752 | 0.030700032 | 0.007775698 | 0.014202078 | 0.010831196 | 0.000115232 |             |
| 0.002071295 | 0.009326107 | 0.017173116 | 0.002867664 | 0.029818482 | 0.094530163 | 0.004995245 | 0.006393001 | 0.001034612 | 0.016002671 | 0.028228425 |             |
| 0.000358121 | 0.003370565 | 0.002985091 |             | 0           | 0.000121859 | 0.041128913 | 0           | 0.000515225 | 0           | 0.000606098 | 9.78E-05    |
| 0.001345374 | 0.024664809 | 0.011055993 | 0.000227656 | 0.007655954 | 0.000556757 | 0.038875655 | 0.001419499 | 0.01388781  | 0.014319066 | 0           |             |
|             | 0.0009195   | 0.034021637 | 0.022125592 | 0.00538386  | 0.014914539 | 0.004285249 | 0.000588959 | 0.111498991 | 0.109965466 | 0.10074696  | 0.001285015 |
|             | 0           | 0.003072129 | 0.003591905 | 0.000375432 | 0.002394803 | 0.000236918 | 0.000907433 | 0.006550723 | 0.006956264 | 0.010014647 | 0           |
| 0.025465315 | 0.028728797 | 0.008898129 | 0.002328479 | 0.009854722 | 0.032765718 | 0.019745395 | 0.029536087 | 0.046218547 | 0.017321496 | 0           |             |
| 0.016502608 | 0.061078317 | 0.01983167  | 0.012692808 | 0.047599368 | 0.010323689 | 0.024190945 | 0.051880047 | 0.019869491 | 0.115363462 | 0.000670443 |             |
| 0.001238906 | 0.002194378 | 0.000848996 | 0.000127807 | 0.003581609 | 0.001608079 |             | 0           | 0.003412054 | 0.000490823 | 0.007971873 | 0           |
| 0.002168085 |             | 0           |             | 0           | 0.000413263 | 0.148502976 | 0.007329267 | 0.038342236 | 0.003478132 | 0.001663964 | 0.004906103 |
| 0.001500237 | 0.00024577  | 0.007156599 | 0.004648971 | 0.000487438 |             | 0           | 0.008808209 | 0           | 0           | 0           | 0.033626885 |

| HC05        | HC06        | HC08        | HC09        | HC11        | HC13        | HC15        | HC16        | HC69        | HC22        | HC23        |             |
|-------------|-------------|-------------|-------------|-------------|-------------|-------------|-------------|-------------|-------------|-------------|-------------|
|             | 0           | 0           | 0           | 0           | 0           | 0           | 0           | 0           | 0           | 0           | 0           |
|             | 0           | 0           | 0           | 0           | 0           | 0           | 0           | 0           | 0           | 0           | 0           |
|             | 0           | 0           | 0           | 0           | 0           | 0           | 0           | 0           | 0           | 0           | 0           |
|             | 0           | 0           | 0           | 0           | 0           | 0           | 0           | 0           | 0           | 0           | 0           |
|             | 0           | 0           | 0           | 0           | 0           | 0           | 0           | 0           | 0           | 0           | 0           |
|             | 0           | 4.97E-05    | 0           | 0           | 7.23E-05    | 0           | 0.000131507 | 0           | 0           | 0.00010557  | 0           |
| 0.008487045 | 5.92E-05    | 0.000187373 |             | 0           | 0.001139559 | 0           | 0           | 0           | 0.000125872 | 0           | 0.000984349 |
|             | 0           | 0.000179948 | 0.000785374 | 0           | 0.000578212 | 9.42E-05    | 0.000302675 | 0           | 0.00014068  | 0           | 0           |
|             | 0           | 3.08E-05    | 0.000195347 | 0           | 7.71E-05    | 0           | 0           | 0           | 0           | 0           | 0           |
|             | 0           | 0.00050196  | 0.004700282 | 0.001420722 | 0.000455342 | 0.004614742 | 0.001252447 | 0.005061552 | 0.003339306 | 0.002164177 | 0.005454451 |
| 0.000861265 | 0.003134885 | 0.01483838  | 0.007067991 | 0.002811554 | 0.01120723  | 0.001884933 | 0.018705516 | 0.014319774 | 0.000195304 |             | 0.02962311  |
| 0.026699203 | 0.02237039  | 0.210416368 | 0.030230897 | 0.029163545 | 0.254605422 | 0.110522229 | 0.141445624 | 0.13563432  | 0.110312301 | 0.090091081 |             |
| 0.004378095 | 0.003352717 | 0.035955764 | 0.006240886 | 0.005789343 | 0.039168405 | 0.015121216 | 0.033758834 | 0.031897407 | 0.023227948 | 0.016137531 |             |
|             | 0           | 0.006757525 | 0.023054904 | 0.026841348 | 0.003377719 | 0.034345686 | 0.0375776   | 0.060167809 | 0.004505472 | 0.001652164 | 0.003132545 |
|             | 0           | 0.000591935 | 0.002463761 | 0.003626995 | 0.000754084 | 0.002501614 | 0.001644881 | 0.005692983 | 0.005427298 | 0.000910538 | 0.010300921 |
|             | 0           | 0.00106785  | 0.035585004 | 0.006066758 | 0.004230581 | 0.012621868 | 0.01078566  | 0.017978107 | 0.008396393 | 0.017170893 | 0.002576678 |
|             | 0           | 0.022164397 | 0.08288284  | 0.071313099 | 0.039708678 | 0.074012451 | 0.043153078 | 0.097442451 | 0.300855929 | 0.132993927 | 0.060080022 |
|             | 0           | 0.006667551 | 0.025450892 | 0.022511907 | 0.011210076 | 0.019848098 | 0.010714688 | 0.030672398 | 0.096869493 | 0.031161503 | 0.019171641 |
|             | 0           | 0.075526111 | 0.13800252  | 0.031487385 | 0.041840833 | 0.224607639 | 0.037233176 | 0.088228608 | 0.112359135 | 0.086123669 | 0.120229527 |
|             | 0           | 0.006132442 | 0.002312268 | 0.038226908 | 0.0270603   | 0.001812934 | 0.000294325 | 0.001343685 | 0.006993292 | 0.000459228 | 0.007208908 |
| 0.021711046 | 0.005507359 | 0.017880209 | 0.01214341  | 0.010210252 | 0.009884808 | 0.010472548 | 0.016806171 | 0.005194065 | 0.00815789  |             | 0.023514357 |
| 0.005921194 | 0.002479022 | 0.003452455 | 0.003439017 | 0.002736868 | 0.004271383 | 0.004258321 | 0.010567631 | 0.002721053 | 0.004869397 |             | 0.010092471 |
| 0.000897151 | 0.001247798 | 0.028739894 | 0.017901487 |             | 0           | 0.000429689 | 0.006047234 | 0.048498962 | 0.003143094 | 0.028176523 | 0.006977296 |
| 0.000933037 | 0.001112837 | 0.004002615 | 0.001396977 | 0.001423846 | 0.00479525  | 0.003582    | 0.007713563 | 0.002950584 | 0.000100291 | 0.004157426 |             |
| 0.048499964 | 0.007458375 | 0.019773876 | 0.014452577 | 0.005517102 | 0.051286026 | 0.021018156 | 0.071826553 | 0.025403901 | 0.00090262  | 0.024956139 |             |
| 0.005813536 | 0.002464815 | 0.014463634 | 0.007673479 | 0.003934248 | 0.004601007 | 0.007831972 | 0.020443214 | 0.007659672 | 0.004204309 | 0.019165851 |             |
| 0.000915094 | 5.45E-05    | 0.000175413 | 0           | 0.000672171 | 0.001858061 | 0.022441772 | 0.004056314 |             | 0           | 9.77E-05    | 0           |
| 0.02054475  | 0.70093573  | 0.198882935 | 0.502442731 | 0.536156291 | 0.155341387 | 0.487377417 | 0.140016064 | 0.035295947 | 0.159489254 | 0.257430386 |             |
|             | 0           | 0.027359214 | 0.038551085 | 0.018038019 | 0.070122605 | 0.016616602 | 0.010134388 | 0.021271652 | 0.015845044 | 0.00295067  | 0.108382599 |
|             | 0           | 0.027503646 | 0.019359263 | 0.022656354 | 0.046264151 | 0.009900504 | 0.006022185 | 0.031702894 | 0.00825201  | 0.000501456 | 0.098400144 |
| 0.008235843 | 0.008554638 |             | 0           | 0.005152589 | 0.000293924 | 0.011107165 | 0.014472031 | 0.000565762 | 0.001136549 | 0.027719934 | 0.008430658 |
| 0.001937845 | 0.000355161 |             | 0           | 0.00017017  | 0           | 0           | 0.000546902 | 0.000171749 | 0           | 0.005537125 | 0.000949607 |
| 0.001202182 | 0.000464077 | 0.001758121 | 0.010849326 | 0.077812818 | 0.002825352 | 0.013789447 | 0.012360896 | 0.012857439 | 0.034109534 | 0.018644725 |             |
|             | 0           | 0.001908397 | 0.02812196  | 0.090207904 | 0.02018922  | 0.010514626 | 0.000409133 | 0.002707577 | 0.000196212 | 0.09459035  | 0.018476807 |
|             | 0           | 0.000163374 | 0.002746815 | 0.010404114 | 0.001553944 | 0.001861985 |             | 0.000873901 | 0.000281361 | 0.003605201 | 0.005315484 |
|             | 0           | 0.003700775 | 0.003875042 | 0.028800282 | 0.011342583 | 0.001402866 | 0.062023287 | 0.086566682 | 0.040804691 | 0.017587893 | 0.013201855 |
|             | 0           | 0.026513932 | 0.024246918 | 0.005926269 | 0.041455358 | 0.030812034 | 0.056197319 | 0.015730212 | 0.106894816 | 0.164443107 | 0.013225016 |
|             | 0           | 0.001894191 | 0.000207307 |             | 0           | 0.00131784  | 0.000502285 | 0.002757472 | 0           | 0.007248738 | 0.000225821 |
| 0.841939999 | 0.031701646 |             | 0           | 0           | 0           | 0.000480702 | 0           | 0           | 0           | 0           | 0.003462592 |
| 0.001022752 | 3.31E-05    | 0.016931381 | 0.0033104   | 0.000727583 | 0.002068001 |             | 0           | 0.007622637 | 0.003250455 | 0.00503303  | 0           |

| HC24        | HC26        | HC27        | HC28        | HC29        | HC30        | HC31        | HC34        | HC71        |             |
|-------------|-------------|-------------|-------------|-------------|-------------|-------------|-------------|-------------|-------------|
|             | 0           | 0           | 0           | 0           | 0           | 0           | 0           | 0           | 0           |
|             | 0           | 0           | 0           | 0           | 0           | 0           | 0           | 0           | 0           |
|             | 0           | 0           | 0           | 0           | 0           | 0           | 0           | 0           | 0           |
|             | 0           | 0           | 0           | 0           | 0           | 0           | 0           | 0           | 0           |
|             | 0           | 0           | 0           | 0           | 0           | 0           | 0           | 0           | 0           |
|             | 0           | 0           | 0           | 0           | 0           | 0           | 0           | 0           | 0           |
| 0.000118347 |             | 0           | 0           | 0.000168166 | 0.00013662  | 0           | 0           | 0           | 0.000797746 |
| 0.000559983 |             | 0           | 0.000627082 | 5.85E-05    | 0.000503338 | 0.000715435 | 0           | 7.09E-05    | 0.000341891 |
| 0           |             | 0           | 0.000241688 | 7.56E-05    | 0           | 0           | 0           | 5.54E-05    | 0           |
| 0.002231273 | 0.000465626 | 0.004742308 | 0.000892011 | 0.00256343  | 0.000290477 | 0.004072743 | 0.000706423 | 0.001773276 |             |
| 0.021210083 |             | 0           | 0.057541316 | 0.005868748 | 0.038415491 | 0.013066094 | 0.019027102 | 0.000203733 | 0.007083987 |
| 0.082880392 | 0.165693467 | 0.160918414 | 0.070134947 | 0.069852558 | 0.040015922 | 0.185176158 | 0.164607559 | 0.132175158 |             |
| 0.01954168  | 0.042975976 | 0.016839767 | 0.012553953 | 0.012058545 | 0.003953717 | 0.03404436  | 0.02446127  | 0.022697021 |             |
| 0.012787244 |             | 0           | 0.002181723 | 0.01351908  | 0.075932164 | 0.012727204 | 0.146571584 | 0.0414132   | 0.01270012  |
| 0.004653056 |             | 0           | 0.002678163 | 0.001745026 | 0.001948638 | 0.000876811 | 0.029460558 | 0.002088265 | 0.00371066  |
| 0.038546468 |             | 0           | 0.003050493 | 0.005291134 | 0.017857721 | 0.004330262 | 0.000432434 | 0.004860808 | 0.00515572  |
| 0.066418619 | 0.227533569 | 0.03872232  | 0.020094612 | 0.050297868 | 0.073878032 | 0.031945089 |             | 0           | 0.041045184 |
| 0.020416293 | 0.058876458 | 0.013723953 | 0.008322996 | 0.012824339 | 0.019548039 | 0.012147468 |             | 0           | 0.013703001 |
| 0.164929468 | 0.038042863 | 0.165758704 | 0.060664036 | 0.039860791 | 0.055680174 | 0.094270641 |             | 0           | 0.134199154 |
| 0.00210138  |             | 0           | 0.002214384 | 0.003368193 | 0           | 0.000344269 | 0.005197072 | 0           | 0.005059991 |
| 0.009502394 |             | 0           | 0.009856947 | 0.006044225 | 0.008225984 | 0.009418992 | 0.027581435 | 0           | 0.022669669 |
| 0.0060559   |             | 0           | 0.003174603 | 0.003151284 | 0.005047763 | 0.002291542 | 0.022769623 | 0           | 0.01002881  |
| 0.024425656 |             | 0           | 0.001156183 | 0           | 0           | 0.001038187 | 0.001556763 | 0.001268903 | 0.00021881  |
| 0.007686779 |             | 0           | 0.008472141 | 0.001584172 | 0.002854647 | 0.001640658 | 0.003876182 | 0           | 0.003387003 |
| 0.020768447 | 0.000257982 | 0.026709779 | 0.012025084 | 0.010577293 | 0.007525511 | 0.02924041  | 0.028715307 | 0.022924948 |             |
| 0.006387849 | 0.000226521 | 0.002710824 | 0.006714452 | 0.000165383 | 0.00311994  | 0.002681092 | 0.005243915 | 0.014286496 |             |
| 0.000588848 |             | 0           | 0.00310275  | 0.001628041 | 0.002081663 | 0.00027434  | 0.000857006 | 0.000141727 | 0.000200576 |
| 0.304824226 | 0.340655399 | 0.372284277 | 0.604393274 | 0.365103562 | 0.633272548 | 0.0321102   | 0.719324314 | 0.350169578 |             |
| 0.017203606 |             | 0           | 0.012032138 | 0.034661682 | 0.007028759 | 0.010285044 | 0.073875475 | 0.000168301 | 0.033054046 |
| 0.017480711 | 0.004316474 | 0.007596838 | 0.023175217 | 0.001412942 | 0.006750905 | 0.050028698 | 0.002006329 | 0.025796835 |             |
| 0.010804211 | 0.001283616 | 0.027036384 | 0.000153543 | 0.012583455 | 0.007299584 | 0.000825556 | 0.00204619  | 0.00179151  |             |
| 0.000245353 | 0.000188767 | 0.001214972 | 0.000745779 | 0.000179764 | 0           | 0           | 7.09E-05    | 0.00251632  |             |
| 0.001994579 |             | 0           | 0.006747665 | 0.003212213 | 0.038645589 | 0.001145771 | 0.009914535 | 0.002546665 | 0.001148755 |
| 0.016507957 | 0.000767653 | 0.012339147 | 0.027549968 | 0           | 0.004297987 | 0.007830989 |             | 0           | 0.036869553 |
| 0.002326528 |             | 0           | 0.000783853 | 0.003663093 | 0.00012943  | 0.000107584 | 0.001163641 | 0           | 0.00339612  |
| 0.05866545  | 0.004203214 | 0.013482265 | 0.011228123 | 0.116364604 | 0.054324614 | 0.056326511 |             | 0           | 0.007936436 |
| 0.053342724 | 0.068428073 | 0.014756026 | 0.051548955 | 0.101645556 | 0.014626064 | 0.110199942 |             | 0           | 0.077645782 |
| 0.002326528 | 0.008318337 | 0.000385394 | 0.004274827 | 0.005702103 | 0.001441628 | 0.005991178 |             | 0           | 0.00518763  |
| 0.000661011 | 0.00329084  | 0.001339082 | 0           | 0           | 0.014744407 | 0.000825556 |             | 0           | 0           |
| 0.001806956 | 0.034475165 | 0.005578418 | 0.001489122 | 0           | 0.000968257 | 0           | 0           | 0.000328216 |             |

Table S25. The corresponding LDA value and p value of the biomarkers in the discovery cohort (48 healthy controls and 24 CP).

| Biomaker_names                                                                                                    | Logarithm value | Gro ups | LDA_value  | P_value   |
|-------------------------------------------------------------------------------------------------------------------|-----------------|---------|------------|-----------|
| d_Bacteria.p__Proteobacteria.c__Gammaproteobacteria.o__Oceanospirillales.f__Halomonadaceae.g__Halomonas           | 3.929382733     | CP      | 3.71991472 | 1.62E-15  |
| d_Bacteria.p__Firmicutes.c__Clostridia.o__Clostridiales.f__Lachnospiraceae.g__Blautia                             | 4.766201009     | HC      | 4.27956144 | 1.99E-06  |
| d_Bacteria.p__Cyanobacteria.c__Cyanobacteria.o__norank.f__norank.g__norank                                        | 3.457844065     | CP      | 3.07259095 | 0.0385952 |
| d_Bacteria.p__Bacteroidetes.c__Bacteroidia.o__Bacteroidales.f__Rikenellaceae.g__RC9_gut_group                     | 2.918772758     |         |            | -         |
| d_Bacteria.p__Firmicutes.c__Clostridia.o__Clostridiales.f__Lachnospiraceae.g__Coprococcus                         | 3.858524666     | HC      | 3.38873412 | 0.0001145 |
| d_Bacteria.p__Proteobacteria.c__Gammaproteobacteria.o__Xanthomonadales.f__Xanthomonadaceae.g__Stenotrophomonas    | 0.798765706     |         |            | -         |
| d_Bacteria.p__Actinobacteria.c__Actinobacteria.o__Micrococcales.f__Micrococcaceae.g__Nesterenkonia                | 1.375663614     |         |            | -         |
| d_Bacteria.p__Firmicutes.c__Clostridia.o__Clostridiales.f__Peptococcaceae.g__Peptococcus                          | 0.970036777     |         |            | -         |
| d_Bacteria.p__Proteobacteria.c__Alphaproteobacteria.o__Rhizobiales.f__Hyphomicrobiaceae.g__Pelagibacterium        | 2.941511433     | CP      | 3.10646664 | 6.46E-14  |
| d_Bacteria.p__Proteobacteria.c__Alphaproteobacteria.o__Rhodospirillales.f__Rhodospirillaceae.g__Thalassospira     | 2.235633641     |         |            | -         |
| d_Bacteria.p__Firmicutes.c__Clostridia.o__Clostridiales.f__Ruminococcaceae.g__Hydrogenoanaerobacterium            | 1.030565992     |         |            | -         |
| d_Bacteria.p__Firmicutes.c__Clostridia.o__Clostridiales.f__Lachnospiraceae.g__Dorea                               | 3.577905695     | HC      | 3.15921888 | 0.000111  |
| d_Bacteria.p__Bacteroidetes.c__Bacteroidia.o__Bacteroidales.f__Porphyromonadaceae.g__Coprobacter                  | 2.423450682     |         |            | -         |
| d_Bacteria.p__Proteobacteria.c__Gammaproteobacteria.o__Enterobacteriales.f__Enterobacteriaceae.g__Raoultella      | 3.384946736     |         |            | -         |
| d_Bacteria.p__Verrucomicrobia.c__Verrucomicrobiae.o__Verrucomicrobiales.f__Verrucomicrobiaceae.g__Akkermansia     | 4.936177671     | CP      | 4.59359367 | 0.0001676 |
| d_Bacteria.p__Proteobacteria.c__Gammaproteobacteria.o__Pasteurellales.f__Pasteurellaceae.g__Haemophilus           | 2.8130247       | HC      | 2.60582596 | 0.0344672 |
| d_Bacteria.p__Firmicutes.c__Clostridia.o__Clostridiales.f__Ruminococcaceae.g__Oscillibacter                       | 1.946738752     |         |            | -         |
| d_Bacteria.p__Firmicutes.c__Bacilli.o__Lactobacillales.f__Streptococcaceae.g__Streptococcus                       | 4.922701027     | CP      | 4.60184077 | 0.0050904 |
| d_Bacteria.p__Proteobacteria.c__Alphaproteobacteria.o__Rhizobiales.f__Brucellaceae.g__Ochrobactrum                | 0.28254659      |         |            | -         |
| d_Bacteria.p__Firmicutes.c__Clostridia.o__Clostridiales.f__Lachnospiraceae.g__Pseudobutyrvibrio                   | 4.459827695     | HC      | 3.96083581 | 4.53E-06  |
| d_Bacteria.p__Actinobacteria.c__Actinobacteria.o__Bifidobacteriales.f__Bifidobacteriaceae.g__Bifidobacterium      | 4.412731372     | CP      | 3.92970026 | 1.89E-05  |
| d_Bacteria.p__Proteobacteria.c__Deltaproteobacteria.o__Desulfovibrionales.f__Desulfovibrionaceae.g__Bilophila     | 2.945601922     | HC      | 3.22137811 | 0.0012039 |
| d_Bacteria.p__Proteobacteria.c__Deltaproteobacteria.o__Desulfovibrionales.f__Desulfovibrionaceae.g__Desulfovibrio | 3.179815007     |         |            | -         |
| d_Bacteria.p__Actinobacteria.c__Actinobacteria.o__Actinomycetales.f__Actinomycetaceae.g__Actinomyces              | 4.384224941     | CP      | 4.11570526 | 1.11E-05  |
| d_Bacteria.p__Firmicutes.c__Clostridia.o__Clostridiales.f__Ruminococcaceae.g__Ruminococcus                        | 4.115032593     | HC      | 3.72802167 | 7.64E-05  |
| d_Bacteria.p__Firmicutes.c__Negativicutes.o__Selenomonadales.f__Veillonellaceae.g__Megamonas                      | 4.484900435     |         |            | -         |
| d_Bacteria.p__Firmicutes.c__Negativicutes.o__Selenomonadales.f__Veillonellaceae.g__Dialister                      | 3.783054518     | HC      | 3.46906089 | 9.99E-05  |
| d_Bacteria.p__Firmicutes.c__Clostridia.o__Clostridiales.f__Christensenellaceae.g__Christensenella                 | 2.023595369     |         |            | -         |
| d_Bacteria.p__Firmicutes.c__Bacilli.o__Lactobacillales.f__Streptococcaceae.g__Lactococcus                         | 1.12764463      |         |            | -         |
| d_Bacteria.p__Firmicutes.c__Clostridia.o__Clostridiales.f__Lachnospiraceae.g__Stomatobaculum                      | 1.505149978     |         |            | -         |
| d_Bacteria.p__Proteobacteria.c__Alphaproteobacteria.o__Sphingomonadales.f__Sphingomonadaceae.g__Sphingomonas      | 2.368131863     | HC      | 3.10369952 | 1.84E-06  |
| d_Bacteria.p__Actinobacteria.c__Actinobacteria.o__Corynebacteriales.f__Nocardaceae.g__Rhodococcus                 | 1.356185261     |         |            | -         |
| d_Bacteria.p__Firmicutes.c__Clostridia.o__Clostridiales.f__Peptostreptococcaceae.g__Peptostreptococcus            | 3.483319792     |         |            | -         |
| d_Bacteria.p__Firmicutes.c__Clostridia.o__Clostridiales.f__Ruminococcaceae.g__Anaerofilum                         | 0.669006781     |         |            | -         |
| d_Bacteria.p__Fusobacteria.c__Fusobacteriia.o__Fusobacteriales.f__Fusobacteriaceae.g__Fusobacterium               | 2.753359599     |         |            | -         |
| d_Bacteria.p__Bacteroidetes.c__Bacteroidia.o__Bacteroidales.f__Prevotellaceae.g__Paraprevotella                   | 3.293611125     |         |            | -         |
| d_Bacteria.p__Firmicutes.c__Clostridia.o__Clostridiales.f__Ruminococcaceae.g__Subdoligranulum                     | 5.290001574     |         |            | -         |
| d_Bacteria.p__Firmicutes.c__Bacilli.o__Lactobacillales.f__Leuconostocaceae.g__Weissella                           | 1.269610222     |         |            | -         |
| d_Bacteria.p__Proteobacteria.c__Betaproteobacteria.o__Neisseriales.f__Neisseriaceae.g__Neisseria                  | 0.875061263     |         |            | -         |
| d_Bacteria.p__Firmicutes.c__Negativicutes.o__Selenomonadales.f__Veillonellaceae.g__Anaeroglobus                   | 2.220108088     |         |            | -         |
| d_Bacteria.p__Firmicutes.c__Clostridia.o__Clostridiales.f__Lachnospiraceae.g__Shuttleworthia                      | 1.043034632     |         |            | -         |
| d_Bacteria.p__Firmicutes.c__Clostridia.o__Clostridiales.f__Ruminococcaceae.g__Flavonifractor                      | 3.152352057     | CP      | 3.15052431 | 0.0275759 |
| d_Bacteria.p__Actinobacteria.c__Actinobacteria.o__Bifidobacteriales.f__Bifidobacteriaceae.g__Scardovia            | 2.738615421     |         |            | -         |
| d_Bacteria.p__Firmicutes.c__Negativicutes.o__Selenomonadales.f__Veillonellaceae.g__Mitsuokella                    | 0.314393957     |         |            | -         |
| d_Bacteria.p__Firmicutes.c__Clostridia.o__Thermoanaerobacterales.f__Thermoanaerobacteraceae.g__Gelria             | 0.89279003      |         |            | -         |
| d_Bacteria.p__Firmicutes.c__Bacilli.o__Lactobacillales.f__Leuconostocaceae.g__Leuconostoc                         | 1.072341822     |         |            | -         |
| d_Bacteria.p__Firmicutes.c__Clostridia.o__Clostridiales.f__Ruminococcaceae.g__uncultured                          | 4.735526711     | HC      | 4.28939121 | 2.35E-05  |
| d_Bacteria.p__Bacteroidetes.c__Bacteroidia.o__Bacteroidales.f__Bacteroidaceae.g__Bacteroides                      | 5.45649553      | HC      | 4.94505948 | 3.22E-05  |
| d_Bacteria.p__Proteobacteria.c__Betaproteobacteria.o__Burkholderiales.f__Oxalobacteraceae.g__Oxalobacter          | 1.656816638     |         |            | -         |
| d_Bacteria.p__Actinobacteria.c__Actinobacteria.o__Actinomycetales.f__Actinomycetaceae.g__Actinobaculum            | 1.001805801     |         |            | -         |
| d_Bacteria.p__Firmicutes.c__Clostridia.o__Clostridiales.f__Lachnospiraceae.g__Johnsonella                         | 1.16879202      |         |            | -         |
| d_Bacteria.p__Proteobacteria.c__Gammaproteobacteria.o__Enterobacteriales.f__Enterobacteriaceae.g__Citrobacter     | 2.377488383     |         |            | -         |
| d_Bacteria.p__Firmicutes.c__Erysipelotrichia.o__Erysipelotrichales.f__Erysipelotrichaceae.g__Holdemania           | 1.947760382     | HC      | 3.94064582 | 4.91E-06  |
| d_Bacteria.p__Firmicutes.c__Erysipelotrichia.o__Erysipelotrichales.f__Erysipelotrichaceae.g__Coprobacillus        | 1.238359786     |         |            | -         |
| d_Bacteria.p__Actinobacteria.c__Actinobacteria.o__Bifidobacteriales.f__Bifidobacteriaceae.g__Alloscardovia        | 2.077670655     |         |            | -         |
| d_Bacteria.p__Firmicutes.c__Clostridia.o__Clostridiales.f__Ruminococcaceae.g__Fastidiosipila                      | 0.867762025     |         |            | -         |
| d_Bacteria.p__Proteobacteria.c__Alphaproteobacteria.o__Rhizobiales.f__Phyllobacteriaceae.g__Aquamicrobium         | 0.996365715     |         |            | -         |
| d_Bacteria.p__Firmicutes.c__Clostridia.o__Clostridiales.f__Lachnospiraceae.g__Roseburia                           | 4.434599506     | HC      | 4.0101607  | 1.01E-06  |
| d_Bacteria.p__Firmicutes.c__Clostridia.o__Clostridiales.f__Lachnospiraceae.g__Epolopiscium                        | 0.263241435     |         |            | -         |
| d_Bacteria.p__Actinobacteria.c__Actinobacteria.o__Coriobacteriales.f__Coriobacteriaceae.g__Adlercreutzia          | 1.952328205     |         |            | -         |
| d_Bacteria.p__Actinobacteria.c__Actinobacteria.o__Corynebacteriales.f__Corynebacteriaceae.g__Corynebacterium      | 1.149988456     |         |            | -         |
| d_Bacteria.p__Firmicutes.c__Clostridia.o__Clostridiales.f__Ruminococcaceae.g__Butyrivibrio                        | 2.287661793     |         |            | -         |

|                                                                                                                   |             |    |                      |
|-------------------------------------------------------------------------------------------------------------------|-------------|----|----------------------|
| d_Bacteria.p_Synergistetes.c_Synergistia.o_Synergistales.f_Synergistaceae.g_Pyramidobacter                        | 1.70969387  | -  |                      |
| d_Bacteria.p_Proteobacteria.c_Alphaproteobacteria.o_Rhizobiales.f_Phyllobacteriaceae.g_Aliihoeflea                | 1.416363092 | -  |                      |
| d_Bacteria.p_Firmicutes.c_Negativicutes.o_Selenomonadales.f_Veillonellaceae.g_Veillonella                         | 3.773673714 | CP | 3.38352304 0.029547  |
| d_Bacteria.p_Proteobacteria.c_Gammaproteobacteria.o_Pseudomonadales.f_Moraxellaceae.g_Acinetobacter               | 1.22184875  | -  |                      |
| d_Bacteria.p_Firmicutes.c_Negativicutes.o_Selenomonadales.f_Veillonellaceae.g_Allisonella                         | 2.105864856 | -  |                      |
| d_Bacteria.p_Firmicutes.c_Clostridia.o_Clostridiales.f_Lachnospiraceae.g_Anaerostipes                             | 3.993169776 | CP | 3.66221551 5.89E-06  |
| d_Bacteria.p_Firmicutes.c_Clostridia.o_Clostridiales.f_Lachnospiraceae.g_Howardella                               | 1.215835766 | -  |                      |
| d_Bacteria.p_Bacteroidetes.c_Bacteroidia.o_Bacteroidales.f_Rikenellaceae.g_Alistipes                              | 4.154127774 | HC | 3.69268786 0.0005851 |
| d_Bacteria.p_Firmicutes.c_Negativicutes.o_Selenomonadales.f_Acidaminococcaceae.g_Acidaminococcus                  | 3.539447266 | -  |                      |
| d_Bacteria.p_Bacteroidetes.c_Bacteroidia.o_Bacteroidales.f_Porphyromonadaceae.g_Porphyromonas                     | 0.439332694 | -  |                      |
| d_Bacteria.p_Actinobacteria.c_Actinobacteria.o_Coriobacteriales.f_Coriobacteriaceae.g_Collinsella                 | 2.769192638 | HC | 3.19477325 0.0114774 |
| d_Bacteria.p_Actinobacteria.c_Actinobacteria.o_Micrococcales.f_Microbacteriaceae.g_Frigoribacterium               | 1.036429266 | -  |                      |
| d_Bacteria.p_Firmicutes.c_Clostridia.o_Clostridiales.f_Family_XI.g_Finegoldia                                     | 1.421878016 | -  |                      |
| d_Bacteria.p_Bacteroidetes.c_Bacteroidia.o_Bacteroidales.f_Bacteroidales_Incertae_Sedis.g_Phocaeicola             | 1.051152522 | -  |                      |
| d_Bacteria.p_Proteobacteria.c_Betaproteobacteria.o_Burkholderiales.f_Alcaligenaceae.g_Sutterella                  | 3.280530947 | HC | 3.08619977 0.0008754 |
| d_Bacteria.p_Actinobacteria.c_Actinobacteria.o_Coriobacteriales.f_Coriobacteriaceae.g_Gordonibacter               | 0.981516594 | -  |                      |
| d_Bacteria.p_Firmicutes.c_Bacilli.o_Bacillales.f_Family_XI.g_Gemella                                              | 2.612474797 | CP | 3.10044123 0.000163  |
| d_Bacteria.p_Bacteroidetes.c_Bacteroidia.o_Bacteroidales.f_Porphyromonadaceae.g_Odoribacter                       | 2.900640184 | HC | 3.15602414 0.0010539 |
| d_Bacteria.p_Firmicutes.c_Clostridia.o_Clostridiales.f_Ruminococcaceae.g_Faecalibacterium                         | 5.145237142 | HC | 4.75769171 6.94E-08  |
| d_Bacteria.p_Firmicutes.c_Bacilli.o_Lactobacillales.f_Enterococcaceae.g_Enterococcus                              | 4.627556587 | CP | 4.25257448 0.0083787 |
| d_Bacteria.p_Firmicutes.c_Negativicutes.o_Selenomonadales.f_Veillonellaceae.g_Megaspheara                         | 3.965552492 | -  |                      |
| d_Bacteria.p_Firmicutes.c_Clostridia.o_Clostridiales.f_Ruminococcaceae.g_Incertae_Sedis                           | 5.009398837 | -  |                      |
| d_Bacteria.p_Actinobacteria.c_Actinobacteria.o_Bifidobacteriales.f_Bifidobacteriaceae.g_Parascardovia             | 1.591064607 | -  |                      |
| d_Bacteria.p_Bacteroidetes.c_Bacteroidia.o_Bacteroidales.f_Prevotellaceae.g_Prevotella                            | 4.774954993 | -  |                      |
| d_Bacteria.p_Synergistetes.c_Synergistia.o_Synergistales.f_Synergistaceae.g_Cloacibacillus                        | 1.009840255 | -  |                      |
| d_Bacteria.p_Firmicutes.c_Clostridia.o_Clostridiales.f_Lachnospiraceae.g_Oribacterium                             | 2.270290553 | CP | 3.39398957 0.0014273 |
| d_Bacteria.p_Lentisphaeria.c_Lentisphaeria.o_Victivallales.f_Victivallaceae.g_Victivallis                         | 1.386944624 | -  |                      |
| d_Bacteria.p_Bacteroidetes.c_Bacteroidia.o_Bacteroidales.f_Porphyromonadaceae.g_Parabacteroides                   | 3.664643934 | HC | 3.2013029 0.0006843  |
| d_Bacteria.p_Firmicutes.c_Bacilli.o_Lactobacillales.f_Lactobacillaceae.g_Lactobacillus                            | 3.829081207 | -  |                      |
| d_Bacteria.p_Actinobacteria.c_Actinobacteria.o_Coriobacteriales.f_Coriobacteriaceae.g_Eggerthella                 | 2.300758477 | -  |                      |
| d_Bacteria.p_Firmicutes.c_Erysipelotrichia.o_Erysipelotrichales.f_Erysipelotrichaceae.g_Catenibacterium           | 2.321917597 | -  |                      |
| d_Bacteria.p_Proteobacteria.c_Betaproteobacteria.o_Burkholderiales.f_Comamonadaceae.g_Acidovorax                  | 0.781156761 | -  |                      |
| d_Bacteria.p_Bacteroidetes.c_Bacteroidia.o_Bacteroidales.f_Prevotellaceae.g_Alloprevotella                        | 2.892599958 | -  |                      |
| d_Bacteria.p_Actinobacteria.c_Actinobacteria.o_Micrococcales.f_Micrococcaceae.g_Rothia                            | 4.332061234 | CP | 4.05958983 3.68E-07  |
| d_Bacteria.p_Bacteroidetes.c_Bacteroidia.o_Bacteroidales.f_Porphyromonadaceae.g_Barnesiella                       | 3.254704132 | -  |                      |
| d_Bacteria.p_Firmicutes.c_Clostridia.o_Clostridiales.f_Lachnospiraceae.g_Lachnoanaerobaculum                      | 2.550686873 | -  |                      |
| d_Bacteria.p_Bacteroidetes.c_Bacteroidia.o_Bacteroidales.f_Porphyromonadaceae.g_Butyricimonas                     | 2.672598086 | -  |                      |
| d_Bacteria.p_Proteobacteria.c_Gammaproteobacteria.o_Enterobacteriales.f_Enterobacteriaceae.g_Escherichia_Shigella | 5.026135251 | -  |                      |
| d_Bacteria.p_Proteobacteria.c_Betaproteobacteria.o_Burkholderiales.f_Alcaligenaceae.g_Achromobacter               | 0.716698771 | -  |                      |
| d_Bacteria.p_Firmicutes.c_Bacilli.o_Bacillales.f_Staphylococcaceae.g_Staphylococcus                               | 1.604316072 | -  |                      |
| d_Bacteria.p_Fusobacteria.c_Fusobacteriia.o_Fusobacteriales.f_Leptotrichiaceae.g_Leptotrichia                     | 1.021189299 | -  |                      |
| d_Bacteria.p_Firmicutes.c_Clostridia.o_Clostridiales.f_Eubacteriaceae.g_Eubacterium                               | 2.913637274 | -  |                      |
| d_Bacteria.p_Firmicutes.c_Clostridia.o_Clostridiales.f_Family_XI.g_Anaerococcus                                   | 0.942008053 | -  |                      |
| d_Bacteria.p_Firmicutes.c_Clostridia.o_Clostridiales.f_Family_XI.g_Peptoniphilus                                  | 1.174883207 | -  |                      |
| d_Bacteria.p_Firmicutes.c_Clostridia.o_Clostridiales.f_Lachnospiraceae.g_Cellulosilyticum                         | 0           | -  |                      |
| d_Bacteria.p_Firmicutes.c_Clostridia.o_Clostridiales.f_Ruminococcaceae.g_Anaerotruncus                            | 3.12832521  | -  |                      |
| d_Bacteria.p_Firmicutes.c_Clostridia.o_Clostridiales.f_Ruminococcaceae.g_Intestinimonas                           | 2.703918001 | HC | 3.23226595 0.0026339 |
| d_Bacteria.p_Proteobacteria.c_Gammaproteobacteria.o_Enterobacteriales.f_Enterobacteriaceae.g_Klebsiella           | 3.626821367 | HC | 3.35026104 0.0003203 |
| d_Bacteria.p_Firmicutes.c_Negativicutes.o_Selenomonadales.f_Acidaminococcaceae.g_Phascloartobacterium             | 3.912717907 | -  |                      |
| d_Bacteria.p_Firmicutes.c_Erysipelotrichia.o_Erysipelotrichales.f_Erysipelotrichaceae.g_Asteroleplasma            | 3.684095092 | -  |                      |
| d_Bacteria.p_Proteobacteria.c_Gammaproteobacteria.o_Pseudomonadales.f_Pseudomonadaceae.g_Pseudomonas              | 1.214181309 | -  |                      |
| d_Bacteria.p_Actinobacteria.c_Actinobacteria.o_Coriobacteriales.f_Coriobacteriaceae.g_Attopobium                  | 3.293620329 | CP | 3.16380974 1.51E-05  |
| d_Bacteria.p_Firmicutes.c_Clostridia.o_Clostridiales.f_Clostridiaceae_1.g_Clostridium_sensu_stricto_1             | 3.899692857 | HC | 3.41742395 1.11E-05  |
| d_Bacteria.p_Firmicutes.c_Bacilli.o_Lactobacillales.f_Carnobacteriaceae.g_Granulicatella                          | 3.090316849 | CP | 3.08009483 5.19E-07  |
| d_Bacteria.p_Firmicutes.c_Erysipelotrichia.o_Erysipelotrichales.f_Erysipelotrichaceae.g_Turicibacter              | 2.500773749 | HC | 3.30647495 4.91E-06  |
| d_Bacteria.p_Firmicutes.c_Clostridia.o_Clostridiales.f_Lachnospiraceae.g_Lachnospira                              | 4.184632291 | HC | 3.87782184 4.33E-10  |
| d_Bacteria.p_Firmicutes.c_Erysipelotrichia.o_Erysipelotrichales.f_Erysipelotrichaceae.g_Solobacterium             | 2.973666537 | CP | 3.3162698 1.08E-06   |
| d_Bacteria.p_Proteobacteria.c_Betaproteobacteria.o_Burkholderiales.f_Alcaligenaceae.g_Parasutterella              | 3.602281606 | HC | 3.19132635 1.88E-05  |
| d_Bacteria.p_Firmicutes.c_Bacilli.o_Lactobacillales.f_Aerococcaceae.g_Abiotrophia                                 | 2.687491802 | -  |                      |

Table S26. the corresponding output value and POD valueof each optimal microbial marker in the discovery cohort

| rownames<br>(Data) | OTU470 (Blautia) | OTU1000 (Blautia) | OTU1092<br>(Lachnospiraceae<br>_unclassified) | OTU1741 (Halomonas) | OTU1314<br>(Pelagibacterium) | OTU1473<br>(Faecalibacterium) | OTU239<br>(Lachnospiraceae<br>_Incertae_Sedis) | group | POD value   |
|--------------------|------------------|-------------------|-----------------------------------------------|---------------------|------------------------------|-------------------------------|------------------------------------------------|-------|-------------|
| 1                  | 0.004821         | 0.028959          | 0.002253                                      | 0                   | 0                            | 0.004225                      | 0.009645                                       | HC    | 0           |
| 2                  | 0.001269         | 0.006014          | 3.67E-04                                      | 0                   | 0                            | 0.006611                      | 0.016231                                       | HC    | 0.008356546 |
| 3                  | 8.00E-04         | 0.008917          | 8.90E-05                                      | 0                   | 0                            | 2.03E-04                      | 0.004304                                       | HC    | 0.123626374 |
| 4                  | 0.001433         | 0.005753          | 4.89E-04                                      | 0                   | 0                            | 0.002396                      | 3.10E-05                                       | HC    | 0.07027027  |
| 5                  | 0.002444         | 0.014258          | 0.001337                                      | 0                   | 0                            | 0.006105                      | 0.003649                                       | HC    | 0           |
| 6                  | 2.41E-04         | 0.002353          | 2.50E-04                                      | 0                   | 0                            | 0.008086                      | 0.001635                                       | HC    | 0.269886364 |
| 7                  | 0.002178         | 0.008141          | 0.001196                                      | 0                   | 0                            | 0.005704                      | 0.003158                                       | HC    | 0           |
| 8                  | 5.96E-04         | 0.007316          | 5.36E-04                                      | 0                   | 0                            | 0.003612                      | 0.008818                                       | HC    | 0           |
| 9                  | 0.00457          | 0.012907          | 8.68E-04                                      | 0                   | 0                            | 0.014577                      | 0.018105                                       | HC    | 0           |
| 10                 | 0.003857         | 0.030842          | 0.00123                                       | 0                   | 0                            | 0.005061                      | 0.014984                                       | HC    | 0           |
| 11                 | 7.64E-04         | 0.006051          | 1.42E-04                                      | 0                   | 0                            | 0.001319                      | 0.004516                                       | HC    | 0.007978723 |
| 12                 | 0.011513         | 0.055607          | 0.003336                                      | 0                   | 0                            | 0.003756                      | 0.020011                                       | HC    | 0           |
| 13                 | 0.001717         | 0.008606          | 4.31E-04                                      | 0                   | 0                            | 0.002039                      | 0.005979                                       | HC    | 0           |
| 14                 | 8.20E-04         | 0.009376          | 1.89E-04                                      | 0                   | 0                            | 0.001263                      | 0.002296                                       | HC    | 0           |
| 15                 | 0.001728         | 0.021857          | 2.98E-04                                      | 0                   | 0                            | 8.81E-04                      | 0.003061                                       | HC    | 0           |
| 16                 | 0.004967         | 0.031259          | 0.002016                                      | 0                   | 0                            | 0.005284                      | 0.023725                                       | HC    | 0           |
| 17                 | 0.00266          | 0.014465          | 6.18E-04                                      | 0                   | 0                            | 0.002041                      | 0.005436                                       | HC    | 0           |
| 18                 | 0.001537         | 0.016266          | 6.86E-04                                      | 0                   | 0                            | 0.00113                       | 0.008951                                       | HC    | 0           |
| 19                 | 0.002239         | 0.010203          | 5.75E-04                                      | 0                   | 0                            | 0.002227                      | 0.022565                                       | HC    | 0           |
| 20                 | 0.006013         | 0.034267          | 0.001556                                      | 0                   | 0                            | 0.003739                      | 0.030343                                       | HC    | 0           |
| 21                 | 0.005836         | 0.030496          | 0.001154                                      | 0                   | 0                            | 0.003355                      | 0.018304                                       | HC    | 0           |
| 22                 | 0.002087         | 0.012779          | 1.78E-04                                      | 0                   | 0                            | 0.001125                      | 0.017557                                       | HC    | 0           |
| 23                 | 0.005729         | 0.035802          | 0.002323                                      | 0                   | 0                            | 0.004342                      | 0.005683                                       | HC    | 0           |
| 24                 | 0.00319          | 0.020164          | 6.08E-04                                      | 0                   | 0                            | 0.002091                      | 0.016979                                       | HC    | 0           |
| 25                 | 0.001643         | 0.009469          | 3.09E-04                                      | 0                   | 0                            | 0.002054                      | 0.009037                                       | HC    | 0           |
| 26                 | 0.002995         | 0.016452          | 8.89E-04                                      | 0                   | 0                            | 0.004672                      | 0.020487                                       | HC    | 0           |
| 27                 | 0.004333         | 0.020247          | 0.001374                                      | 0                   | 0                            | 0.006017                      | 0.034638                                       | HC    | 0           |
| 28                 | 0.008457         | 0.094272          | 1.30E-05                                      | 0                   | 0                            | 0                             | 6.80E-05                                       | HC    | 0.23480663  |
| 29                 | 2.44E-04         | 0.001488          | 0                                             | 0                   | 0                            | 0                             | 0                                              | HC    | 0.747159091 |
| 30                 | 0.001416         | 0.009448          | 0.001056                                      | 0                   | 0                            | 0.005049                      | 0.009361                                       | HC    | 0           |
| 31                 | 0.009019         | 0.05278           | 0.001418                                      | 0                   | 0                            | 0.001864                      | 0.02079                                        | HC    | 0           |
| 32                 | 0.003154         | 0.015278          | 0.00149                                       | 0                   | 0                            | 0.007265                      | 0.03604                                        | HC    | 0           |
| 33                 | 0.002403         | 0.012105          | 0.002003                                      | 0                   | 0                            | 0.00938                       | 0.016482                                       | HC    | 0           |
| 34                 | 0.019963         | 0.129765          | 0.003885                                      | 0                   | 0                            | 0.003334                      | 0.037722                                       | HC    | 0           |
| 35                 | 0.007244         | 0.052947          | 0.002197                                      | 0                   | 0                            | 0.006651                      | 0.020673                                       | HC    | 0           |
| 36                 | 0.006683         | 0.028001          | 0.001479                                      | 0                   | 0                            | 0.001866                      | 0.01929                                        | HC    | 0           |
| 37                 | 0.008616         | 0.036637          | 8.43E-04                                      | 0                   | 0                            | 0.001299                      | 0.081266                                       | HC    | 0           |
| 38                 | 0.008801         | 0.041797          | 9.29E-04                                      | 0                   | 0                            | 0.002823                      | 0.050391                                       | HC    | 0           |
| 39                 | 0.002787         | 0.015559          | 0.001339                                      | 0                   | 0                            | 0.002077                      | 0.010376                                       | HC    | 0           |
| 40                 | 0.00677          | 0.028713          | 0.001618                                      | 0                   | 0                            | 0.005596                      | 0.02301                                        | HC    | 0           |
| 41                 | 0.00683          | 0.026333          | 0.00117                                       | 0                   | 0                            | 0.00225                       | 0.036161                                       | HC    | 0           |
| 42                 | 0.002578         | 0.024635          | 7.10E-04                                      | 0                   | 0                            | 8.27E-04                      | 0.005928                                       | HC    | 0.002597403 |
| 43                 | 0.005151         | 0.028777          | 0.004474                                      | 0                   | 0                            | 0.009111                      | 0.008245                                       | HC    | 0           |
| 44                 | 0.003354         | 0.019429          | 4.11E-04                                      | 0                   | 0                            | 0.004663                      | 0.01399                                        | HC    | 0           |
| 45                 | 7.35E-04         | 0.007439          | 2.91E-04                                      | 0                   | 0                            | 0.00218                       | 0.013734                                       | HC    | 0           |
| 46                 | 0.00433          | 0.023552          | 5.43E-04                                      | 0                   | 0                            | 4.54E-04                      | 0.004063                                       | HC    | 0.018567639 |
| 47                 | 0.011046         | 0.074332          | 0.007132                                      | 0                   | 0                            | 0.009555                      | 0                                              | HC    | 0.069164265 |
| 48                 | 0.004979         | 0.028995          | 0.001694                                      | 0                   | 0                            | 0.002189                      | 0.009004                                       | HC    | 0           |
| 49                 | 0                | 1.24E-04          | 0                                             | 0.002168            | 1.74E-04                     | 0                             | 2.80E-05                                       | CP    | 0.991428571 |
| 50                 | 0.001451         | 0.003914          | 0                                             | 7.02E-04            | 4.00E-05                     | 0                             | 9.50E-05                                       | CP    | 0.760115607 |
| 51                 | 1.01E-04         | 0.001511          | 0                                             | 2.73E-04            | 0                            | 0                             | 0                                              | CP    | 0.854497354 |
| 52                 | 0                | 0                 | 0                                             | 0.009579            | 0.001149                     | 0                             | 0                                              | CP    | 1           |
| 53                 | 0                | 4.80E-05          | 0                                             | 0.006103            | 0.003037                     | 0                             | 2.54E-04                                       | CP    | 0.978082192 |
| 54                 | 0                | 0                 | 0                                             | 0.138472            | 0.011268                     | 0                             | 0                                              | CP    | 1           |
| 55                 | 2.00E-04         | 0.002664          | 2.40E-05                                      | 0.007827            | 9.99E-04                     | 8.14E-04                      | 1.70E-05                                       | CP    | 0.748648649 |

|    |          |          |          |          |          |          |             |             |
|----|----------|----------|----------|----------|----------|----------|-------------|-------------|
| 56 | 0        | 2.90E-05 | 0        | 7.41E-04 | 4.90E-05 | 4.27E-04 | 0 CP        | 0.966480447 |
| 57 | 0        | 0        | 0        | 0        | 0        | 0        | 0 CP        | 0.475195822 |
| 58 | 0        | 0.005167 | 4.40E-05 | 0.006131 | 4.09E-04 | 1.09E-04 | 2.30E-05 CP | 0.700265252 |
| 59 | 0        | 1.70E-05 | 0        | 0.001996 | 5.43E-04 | 0        | 0 CP        | 1           |
| 60 | 0        | 6.40E-05 | 0        | 0.002864 | 3.63E-04 | 0        | 0 CP        | 1           |
| 61 | 1.25E-04 | 0.00109  | 0        | 0.003695 | 4.04E-04 | 1.80E-05 | 0.018761 CP | 0.905982906 |
| 62 | 0        | 0        | 0        | 0.004878 | 5.76E-04 | 0        | 0 CP        | 1           |
| 63 | 0.001393 | 0.004193 | 0        | 4.17E-04 | 5.00E-05 | 2.40E-05 | 0 CP        | 0.823529412 |
| 64 | 0        | 0        | 0        | 0.001096 | 3.30E-05 | 0        | 0 CP        | 1           |
| 65 | 0        | 5.60E-05 | 0        | 0.004927 | 5.17E-04 | 0        | 0 CP        | 1           |
| 66 | 1.41E-04 | 0.001016 | 0        | 5.30E-05 | 0        | 0        | 0 CP        | 0.566929134 |
| 67 | 0        | 0        | 0        | 0.001077 | 1.58E-04 | 9.87E-04 | 0 CP        | 0.905370844 |
| 68 | 0        | 3.20E-05 | 0        | 0.002362 | 2.14E-04 | 0        | 0 CP        | 1           |
| 69 | 0        | 0        | 0        | 6.06E-04 | 6.50E-05 | 3.90E-05 | 0 CP        | 1           |
| 70 | 0        | 0        | 0        | 0.006577 | 7.92E-04 | 0        | 0 CP        | 1           |
| 71 | 0        | 0        | 0        | 3.34E-04 | 3.70E-05 | 0        | 0 CP        | 0.997297297 |
| 72 | 4.50E-05 | 0.002128 | 0        | 0.001105 | 9.90E-05 | 0        | 0 CP        | 0.972677596 |

Table S27. the corresponding and POD valueoutput value of each optimal microbial marker in the validation cohort

| SampleID | OTU470 (Blautia) | OTU1000 (Blautia) | OTU1092 (Lachnospiraceae_unclassified) | OTU1741 (Halomonas) | OTU1314 (Pelagibacterium) | OTU1473 (Faecalibacterium) | OTU239 (Lachnospiraceae_Incertae_Sedis) | POD value |
|----------|------------------|-------------------|----------------------------------------|---------------------|---------------------------|----------------------------|-----------------------------------------|-----------|
| HC02     | 0.005969         | 0.001279          | 5.25E-04                               | 0                   | 0                         | 0.005308                   | 0.003669                                | 0.1       |
| HC07     | 0.025119         | 0.003493          | 0.001493                               | 0                   | 0                         | 0.004196                   | 0.011982                                | 0.09      |
| HC10     | 0                | 0                 | 0                                      | 0                   | 0                         | 3.92E-04                   | 0                                       | 0.743     |
| HC12     | 0.013243         | 0.001671          | 5.64E-04                               | 0                   | 0                         | 0.002322                   | 0.009501                                | 0.11      |
| HC14     | 0.008115         | 0.001141          | 9.44E-04                               | 0                   | 0                         | 0.005808                   | 0.003056                                | 0.121     |
| HC18     | 9.60E-05         | 0.001259          | 0.002059                               | 0                   | 0                         | 0.005006                   | 0.00199                                 | 0.367     |
| HC19     | 0.01332          | 0.001734          | 8.85E-04                               | 0                   | 0                         | 0.002743                   | 0.021297                                | 0.105     |
| HC20     | 0.011681         | 0.001449          | 2.95E-04                               | 0                   | 0                         | 6.12E-04                   | 0.009701                                | 0.117     |
| HC21     | 0.018729         | 0.002195          | 7.31E-04                               | 0                   | 0                         | 0.001726                   | 0.018331                                | 0.101     |
| HC25     | 0.022031         | 0.003317          | 0.001299                               | 0                   | 0                         | 0.002895                   | 0.015552                                | 0.096     |
| HC33     | 0.275772         | 0.012289          | 0                                      | 0                   | 0                         | 0                          | 0                                       | 0.204     |
| HC39     | 0.029404         | 0.004465          | 0.002251                               | 0                   | 0                         | 0.006343                   | 0.016458                                | 0.076     |
| HC42     | 0.001736         | 3.16E-04          | 4.10E-05                               | 0                   | 0                         | 0                          | 0.001062                                | 0.315     |
| HC43     | 0.006593         | 0.001084          | 0.001055                               | 0                   | 0                         | 0.009139                   | 7.61E-04                                | 0.143     |
| HC44     | 0.013645         | 0.002975          | 0.002404                               | 0                   | 0                         | 0.013435                   | 0.014157                                | 0.08      |
| HC45     | 0.00458          | 8.53E-04          | 0                                      | 0                   | 0                         | 2.71E-04                   | 0.011943                                | 0.343     |
| HC50     | 0.008756         | 0.004161          | 8.68E-04                               | 0                   | 0                         | 0.006832                   | 0.00599                                 | 0.075     |
| HC53     | 0.01106          | 0.001849          | 0.002224                               | 0                   | 0                         | 0.011914                   | 0.015408                                | 0.089     |
| HC57     | 0.018506         | 0.003112          | 0.001684                               | 0                   | 0                         | 0.003131                   | 0                                       | 0.139     |
| HC59     | 0.027214         | 0.003952          | 0.001095                               | 0                   | 0                         | 0.001716                   | 0.003479                                | 0.091     |
| HC61     | 0.01034          | 0.002471          | 6.62E-04                               | 0                   | 0                         | 0.00185                    | 0.00229                                 | 0.096     |
| HC66     | 0.010587         | 0.00174           | 4.20E-05                               | 0                   | 0                         | 2.80E-04                   | 0.015056                                | 0.221     |
| HC70     | 0.014426         | 0.00207           | 5.82E-04                               | 0                   | 0                         | 0.001095                   | 3.30E-05                                | 0.13      |
| HC72     | 0.024296         | 0.003453          | 2.48E-04                               | 0                   | 0                         | 6.14E-04                   | 0.00718                                 | 0.108     |
| CP01     | 4.38E-04         | 4.76E-04          | 6.00E-05                               | 2.47E-04            | 3.70E-05                  | 9.90E-05                   | 0                                       | 0.808     |
| CP06     | 3.00E-05         | 3.90E-05          | 1.30E-05                               | 6.09E-04            | 6.30E-05                  | 6.10E-05                   | 0                                       | 0.962     |
| CP08     | 0.002592         | 4.55E-04          | 0                                      | 0.002256            | 1.81E-04                  | 5.57E-04                   | 1.67E-04                                | 0.891     |
| CP09     | 0.002325         | 0.002175          | 0                                      | 0.010435            | 9.28E-04                  | 0                          | 5.60E-05                                | 0.895     |
| CP16     | 0.041097         | 0.004368          | 0                                      | 4.74E-04            | 1.53E-04                  | 0                          | 0                                       | 0.892     |
| CP20     | 0                | 0                 | 0                                      | 9.34E-04            | 2.30E-05                  | 0.004178                   | 2.90E-05                                | 0.944     |
| CP21     | 0                | 0                 | 0                                      | 0.001927            | 2.58E-04                  | 0                          | 0                                       | 1         |
| CP23     | 0                | 0                 | 0                                      | 0.012599            | 0.001569                  | 0                          | 0                                       | 1         |
| CP25     | 3.03E-04         | 0                 | 0                                      | 8.70E-05            | 0                         | 7.80E-05                   | 3.20E-05                                | 0.61      |
| CP31     | 5.00E-05         | 0                 | 0                                      | 3.40E-05            | 0                         | 0                          | 0                                       | 0.891     |
| CP32     | 0.002406         | 1.79E-04          | 0                                      | 0.005438            | 7.55E-04                  | 0                          | 0                                       | 0.904     |
| CP35     | 0.023236         | 0.002989          | 2.87E-04                               | 0.001738            | 2.87E-04                  | 3.13E-04                   | 0.003426                                | 0.622     |

**Table S28. the corresponding output value and POD value of each optimal microbial marker in the SP (n=23) and HC (n=24)**

| SampleID | groups           |                   |                                               |                        |                                  |                                   | OTU239<br>(Lachnospiraceae<br>_Incertae_Sedis) |
|----------|------------------|-------------------|-----------------------------------------------|------------------------|----------------------------------|-----------------------------------|------------------------------------------------|
|          | OTU470 (Blautia) | OTU1000 (Blautia) | OTU1092<br>(Lachnospiraceae_uncla<br>ssified) | OTU1741<br>(Halomonas) | OTU1314<br>(Pelagibacter<br>ium) | OTU1473<br>(Faecalibacter<br>ium) |                                                |
| HC02     | 0.00615          | 0.001205          | 5.44E-04                                      | 0                      | 0                                | 0.005292                          | 0.003741                                       |
| HC07     | 0.024804         | 0.003337          | 0.001499                                      | 0                      | 0                                | 0.004104                          | 0.012026                                       |
| HC10     | 0                | 0                 | 0                                             | 0                      | 0                                | 3.81E-04                          | 0                                              |
| HC12     | 0.013316         | 0.001644          | 6.08E-04                                      | 0                      | 0                                | 0.002332                          | 0.009154                                       |
| HC14     | 0.008132         | 0.001135          | 9.34E-04                                      | 0                      | 0                                | 0.005919                          | 0.002984                                       |
| HC18     | 9.00E-05         | 0.001188          | 0.002065                                      | 0                      | 0                                | 0.005076                          | 0.002048                                       |
| HC19     | 0.013208         | 0.001738          | 8.34E-04                                      | 0                      | 0                                | 0.002641                          | 0.021422                                       |
| HC20     | 0.01185          | 0.001461          | 2.75E-04                                      | 0                      | 0                                | 6.09E-04                          | 0.009552                                       |
| HC21     | 0.018933         | 0.002241          | 7.87E-04                                      | 0                      | 0                                | 0.001717                          | 0.018212                                       |
| HC25     | 0.022036         | 0.003388          | 0.001275                                      | 0                      | 0                                | 0.002914                          | 0.015317                                       |
| HC33     | 0.27585          | 0.012071          | 0                                             | 0                      | 0                                | 0                                 | 0                                              |
| HC39     | 0.029428         | 0.004385          | 0.002302                                      | 0                      | 0                                | 0.006434                          | 0.016209                                       |
| HC42     | 0.001759         | 3.29E-04          | 5.90E-05                                      | 0                      | 0                                | 0                                 | 0.0011                                         |
| HC43     | 0.006503         | 0.001077          | 0.001021                                      | 0                      | 0                                | 0.00921                           | 7.44E-04                                       |
| HC44     | 0.01354          | 0.002969          | 0.002362                                      | 0                      | 0                                | 0.013742                          | 0.014325                                       |
| HC45     | 0.004528         | 8.00E-04          | 0                                             | 0                      | 0                                | 3.01E-04                          | 0.011909                                       |
| HC50     | 0.008774         | 0.004065          | 8.28E-04                                      | 0                      | 0                                | 0.006923                          | 0.006112                                       |
| HC53     | 0.011107         | 0.001838          | 0.002271                                      | 0                      | 0                                | 0.011985                          | 0.0157                                         |
| HC57     | 0.018298         | 0.00312           | 0.001708                                      | 0                      | 0                                | 0.003137                          | 0                                              |
| HC59     | 0.027306         | 0.004006          | 0.00105                                       | 0                      | 0                                | 0.001722                          | 0.003509                                       |
| HC61     | 0.010418         | 0.002492          | 6.71E-04                                      | 0                      | 0                                | 0.001831                          | 0.002221                                       |
| HC66     | 0.010434         | 0.001761          | 3.40E-05                                      | 0                      | 0                                | 3.10E-04                          | 0.01506                                        |
| HC70     | 0.014392         | 0.002108          | 5.82E-04                                      | 0                      | 0                                | 0.001122                          | 3.70E-05                                       |
| HC72     | 0.024269         | 0.003437          | 2.69E-04                                      | 0                      | 0                                | 6.18E-04                          | 0.007093                                       |
| SP02     | 0.002971         | 4.70E-04          | 1.01E-04                                      | 5.99E-04               | 4.20E-05                         | 7.06E-04                          | 0.002038                                       |
| SP03     | 2.00E-05         | 0                 | 0                                             | 3.37E-04               | 2.30E-05                         | 0                                 | 0                                              |
| SP04     | 0.014707         | 0.001824          | 8.12E-04                                      | 0.006687               | 8.35E-04                         | 0.002398                          | 0.004786                                       |
| SP05     | 0                | 0                 | 0                                             | 7.85E-04               | 1.38E-04                         | 0                                 | 0                                              |
| SP06     | 9.86E-04         | 5.60E-05          | 2.70E-05                                      | 0.033279               | 0.001734                         | 2.90E-05                          | 0                                              |
| SP08     | 0.002407         | 2.26E-04          | 2.20E-05                                      | 0.003311               | 1.54E-04                         | 1.74E-04                          | 0                                              |
| SP09     | 0.017217         | 0.004889          | 0.001232                                      | 1.36E-04               | 0                                | 0.007841                          | 0.00867                                        |
| SP10     | 0.003152         | 1.76E-04          | 4.00E-05                                      | 3.48E-04               | 6.20E-05                         | 0.001501                          | 0                                              |
| SP12     | 0                | 0                 | 0                                             | 3.26E-04               | 1.02E-04                         | 0                                 | 0                                              |
| SP13     | 7.15E-04         | 1.68E-04          | 0                                             | 4.03E-04               | 5.70E-05                         | 2.36E-04                          | 4.29E-04                                       |
| SP14     | 0.181557         | 0.007346          | 0.001683                                      | 0.002751               | 2.83E-04                         | 0.001089                          | 0.002578                                       |
| SP15     | 0.00695          | 0.001824          | 2.40E-05                                      | 0.001136               | 8.80E-05                         | 1.46E-04                          | 0.001961                                       |
| SP16     | 0.023838         | 0.003111          | 8.80E-05                                      | 5.25E-04               | 7.30E-05                         | 1.07E-04                          | 8.00E-04                                       |
| SP18     | 0.170259         | 0.025031          | 0.004015                                      | 6.55E-04               | 0                                | 0.00454                           | 0.029362                                       |
| SP19     | 3.00E-05         | 0                 | 0                                             | 1.37E-04               | 1.07E-04                         | 0                                 | 0                                              |
| SP20     | 2.00E-05         | 0                 | 0                                             | 5.93E-04               | 1.30E-04                         | 0                                 | 0                                              |
| SP21     | 6.52E-04         | 7.83E-04          | 0                                             | 8.20E-04               | 2.80E-05                         | 0                                 | 0                                              |
| SP22     | 0                | 0                 | 0                                             | 0.001058               | 3.08E-04                         | 0                                 | 0                                              |
| SP23     | 7.60E-05         | 0                 | 0                                             | 0.012531               | 0.001204                         | 0                                 | 0                                              |
| SP24     | 0                | 0                 | 0                                             | 0.043761               | 0.001619                         | 0                                 | 0                                              |
| SP25     | 3.21E-04         | 1.42E-04          | 0                                             | 0.002849               | 3.96E-04                         | 7.50E-05                          | 0                                              |
| SP26     | 8.60E-05         | 0                 | 0                                             | 0.001429               | 4.78E-04                         | 0                                 | 0                                              |
| SP27     | 0                | 0                 | 0                                             | 8.10E-05               | 0                                | 4.20E-05                          | 0                                              |

Table S29. The detailed values of gut microbial diversity index and observed OTUs among CP (n=36), SP (n=23), and HC (n=72) groups.

| sample | reads | label | ace        | chao       | shannon  | simpson  | coverage | observed_otus |
|--------|-------|-------|------------|------------|----------|----------|----------|---------------|
| CP01   | 31489 | 0.97  | 201.067692 | 213.235294 | 1.667416 | 0.456956 | 0.998698 | 165           |
| CP21   | 31654 | 0.97  | 50.166881  | 48.5       | 0.73286  | 0.633118 | 0.999747 | 45            |
| CP22   | 56644 | 0.97  | 361.487457 | 281        | 2.704022 | 0.118824 | 0.99887  | 197           |
| CP23   | 45331 | 0.97  | 52.679179  | 46.142857  | 0.163161 | 0.950817 | 0.999713 | 35            |
| CP24   | 30330 | 0.97  | 75.209466  | 70         | 0.140884 | 0.962296 | 0.999472 | 40            |
| CP25   | 27621 | 0.97  | 197.070466 | 195.75     | 2.140191 | 0.34789  | 0.998733 | 166           |
| CP26   | 42209 | 0.97  | 334.330974 | 340.034483 | 3.482477 | 0.070752 | 0.99865  | 285           |
| CP27   | 49652 | 0.97  | 305.964285 | 320.956522 | 3.061361 | 0.100055 | 0.998872 | 254           |
| CP28   | 61416 | 0.97  | 187.714695 | 199        | 1.82492  | 0.238741 | 0.999398 | 162           |
| CP29   | 61483 | 0.97  | 193.431115 | 197.555556 | 2.181263 | 0.203754 | 0.999528 | 175           |
| CP31   | 33152 | 0.97  | 369.496133 | 145        | 0.090787 | 0.976345 | 0.998914 | 55            |
| CP32   | 39183 | 0.97  | 251.370945 | 207        | 2.919652 | 0.102262 | 0.999005 | 150           |
| CP33   | 20422 | 0.97  | 246.425096 | 240.16129  | 3.55354  | 0.051729 | 0.998041 | 215           |
| CP34   | 41577 | 0.97  | 251.177689 | 273.5      | 3.062047 | 0.092475 | 0.998966 | 209           |
| CP35   | 42439 | 0.97  | 392.425772 | 386.25     | 2.958414 | 0.133122 | 0.998209 | 315           |
| CP36   | 45876 | 0.97  | 311.394151 | 309.0625   | 3.603732 | 0.055046 | 0.998845 | 266           |
| CP20   | 42142 | 0.97  | 136.024625 | 143.333333 | 2.287458 | 0.179041 | 0.999407 | 110           |
| CP19   | 44382 | 0.97  | 136.666956 | 138.769231 | 1.491432 | 0.311645 | 0.999302 | 103           |
| CP30   | 42015 | 0.97  | 108.728746 | 104.4      | 1.558696 | 0.35855  | 0.999476 | 89            |
| CP17   | 42280 | 0.97  | 158.205636 | 176        | 0.570417 | 0.817909 | 0.99929  | 89            |
| CP18   | 33324 | 0.97  | 130.035087 | 119.454545 | 1.349886 | 0.479352 | 0.99913  | 101           |
| CP02   | 31810 | 0.97  | 83.578685  | 80.6       | 1.265948 | 0.413904 | 0.999466 | 67            |
| CP03   | 27480 | 0.97  | 92.349466  | 98.5       | 0.76672  | 0.714889 | 0.999127 | 64            |
| CP04   | 57604 | 0.97  | 235.515699 | 202        | 1.099829 | 0.641076 | 0.999375 | 112           |
| CP06   | 52111 | 0.97  | 157.104102 | 131.230769 | 1.241751 | 0.423125 | 0.999443 | 100           |
| CP07   | 51571 | 0.97  | 95.709904  | 89.230769  | 1.829343 | 0.298104 | 0.99969  | 80            |
| CP08   | 44235 | 0.97  | 237.318714 | 252.666667 | 2.615052 | 0.124706 | 0.998824 | 179           |
| CP05   | 40549 | 0.97  | 133.67223  | 135.461538 | 0.668026 | 0.784253 | 0.99926  | 102           |
| CP10   | 35119 | 0.97  | 220.475    | 212.464286 | 2.859708 | 0.108386 | 0.998889 | 186           |
| CP11   | 31236 | 0.97  | 106.636878 | 101.5      | 0.634887 | 0.765471 | 0.999296 | 85            |
| CP12   | 33271 | 0.97  | 273.909026 | 207.47619  | 1.3312   | 0.51739  | 0.998587 | 156           |
| CP13   | 28076 | 0.97  | 149.90407  | 150.071429 | 1.9271   | 0.282673 | 0.999038 | 125           |
| CP14   | 43254 | 0.97  | 291.209212 | 298.041667 | 3.404199 | 0.062521 | 0.998913 | 253           |
| CP15   | 50283 | 0.97  | 82.353912  | 71         | 1.990948 | 0.252428 | 0.999741 | 58            |
| CP09   | 36465 | 0.97  | 183.667091 | 180.368421 | 3.132988 | 0.072278 | 0.999205 | 159           |
| CP16   | 44329 | 0.97  | 188.44898  | 196.1875   | 1.428169 | 0.514273 | 0.99921  | 159           |
| SP02   | 36067 | 0.97  | 336.150227 | 330.317073 | 2.811368 | 0.115484 | 0.99817  | 278           |
| SP03   | 36572 | 0.97  | 98.137135  | 64.2       | 0.305017 | 0.897055 | 0.999535 | 37            |
| SP04   | 46884 | 0.97  | 277.885409 | 273.555556 | 2.873749 | 0.117179 | 0.998955 | 230           |
| SP05   | 38039 | 0.97  | 46.533304  | 40.166667  | 1.159334 | 0.383199 | 0.999711 | 31            |
| SP06   | 34998 | 0.97  | 168.324413 | 159.142857 | 2.153221 | 0.257766 | 0.999057 | 134           |
| SP08   | 43306 | 0.97  | 201.923536 | 181.625    | 2.30525  | 0.19921  | 0.999146 | 140           |
| SP09   | 32227 | 0.97  | 365.442299 | 372.451613 | 2.750527 | 0.180161 | 0.997766 | 290           |
| SP10   | 34122 | 0.97  | 249.796022 | 196.3      | 1.710134 | 0.386431 | 0.998886 | 126           |
| SP12   | 35103 | 0.97  | 85.964641  | 85.333333  | 0.926131 | 0.661651 | 0.999544 | 72            |
| SP13   | 39967 | 0.97  | 284.512055 | 273        | 1.680528 | 0.432445 | 0.998574 | 231           |
| SP14   | 14566 | 0.97  | 206.501492 | 202.291667 | 2.914205 | 0.120425 | 0.997391 | 173           |
| SP15   | 38557 | 0.97  | 551.861407 | 559.2      | 4.149856 | 0.04181  | 0.997277 | 450           |
| SP16   | 31146 | 0.97  | 407.233941 | 435.535714 | 3.596316 | 0.060898 | 0.997335 | 314           |
| SP18   | 37828 | 0.97  | 239.509871 | 252.166667 | 3.252243 | 0.069376 | 0.998863 | 202           |
| SP19   | 35781 | 0.97  | 53.193238  | 55.5       | 1.102045 | 0.416291 | 0.999665 | 39            |
| SP20   | 60786 | 0.97  | 107.923106 | 91.6       | 1.264927 | 0.466961 | 0.999704 | 61            |
| SP21   | 37662 | 0.97  | 230.815562 | 194.555556 | 2.22894  | 0.285598 | 0.998911 | 149           |
| SP22   | 45205 | 0.97  | 65.598996  | 111        | 0.845682 | 0.513192 | 0.999624 | 43            |
| SP23   | 31843 | 0.97  | 183.212169 | 198        | 2.345416 | 0.171654 | 0.998744 | 138           |
| SP24   | 30948 | 0.97  | 113.030618 | 118.111111 | 1.741466 | 0.351575 | 0.999257 | 90            |
| SP25   | 43260 | 0.97  | 140.893742 | 143.75     | 1.554828 | 0.33222  | 0.999283 | 105           |
| SP26   | 47798 | 0.97  | 128.427262 | 128.076923 | 1.631577 | 0.400142 | 0.999477 | 105           |
| SP27   | 27929 | 0.97  | 204.122567 | 198.909091 | 2.3274   | 0.17471  | 0.998639 | 135           |
| HC36   | 29266 | 0.97  | 423.306157 | 413.22     | 4.06162  | 0.034299 | 0.997711 | 369           |
| HC37   | 48295 | 0.97  | 400.421412 | 412.181818 | 3.624674 | 0.060344 | 0.998551 | 339           |
| HC38   | 30889 | 0.97  | 539.096702 | 526.28125  | 3.131462 | 0.143928 | 0.996504 | 436           |
| HC39   | 35664 | 0.97  | 489.069672 | 465.2      | 3.788586 | 0.060656 | 0.997729 | 422           |
| HC42   | 28633 | 0.97  | 255.614978 | 254.666667 | 1.892381 | 0.286558 | 0.997765 | 180           |
| HC41   | 30428 | 0.97  | 527.636661 | 524.196078 | 3.709752 | 0.071073 | 0.996484 | 413           |

|      |       |      |            |            |          |          |          |     |
|------|-------|------|------------|------------|----------|----------|----------|-----|
| HC43 | 25280 | 0.97 | 465.380701 | 446.5      | 3.442358 | 0.107172 | 0.996638 | 387 |
| HC35 | 19209 | 0.97 | 491.046754 | 456.940299 | 3.688085 | 0.063384 | 0.994586 | 377 |
| HC44 | 32157 | 0.97 | 392.155974 | 384.065217 | 3.190705 | 0.136566 | 0.997916 | 336 |
| HC40 | 8033  | 0.97 | 324.560805 | 306.488372 | 2.5033   | 0.194746 | 0.990041 | 233 |
| HC34 | 31257 | 0.97 | 286.025961 | 288.214286 | 3.041132 | 0.130429 | 0.998304 | 239 |
| HC26 | 27004 | 0.97 | 217.385056 | 217.666667 | 2.194253 | 0.188759 | 0.998445 | 122 |
| HC32 | 21079 | 0.97 | 410.122654 | 365.121212 | 1.920792 | 0.431204 | 0.996062 | 262 |
| HC31 | 18518 | 0.97 | 383.893634 | 388.777778 | 3.827242 | 0.04248  | 0.99568  | 301 |
| HC30 | 37395 | 0.97 | 494.397652 | 489.818182 | 3.731413 | 0.059769 | 0.997593 | 417 |
| HC29 | 28440 | 0.97 | 309.487959 | 331.391304 | 3.306892 | 0.081901 | 0.997996 | 262 |
| HC28 | 28427 | 0.97 | 387.369516 | 393.171429 | 3.360667 | 0.120247 | 0.997643 | 330 |
| HC27 | 53068 | 0.97 | 733.933116 | 700        | 4.319796 | 0.03624  | 0.997739 | 630 |
| HC25 | 16491 | 0.97 | 415.285613 | 392.631579 | 3.024273 | 0.203937 | 0.994724 | 327 |
| HC24 | 19812 | 0.97 | 548.178043 | 545.775862 | 4.247217 | 0.037325 | 0.994599 | 448 |
| HC23 | 24902 | 0.97 | 512.889789 | 504.75     | 3.264869 | 0.150824 | 0.995743 | 412 |
| HC45 | 21690 | 0.97 | 306.321009 | 301.676471 | 2.960702 | 0.12616  | 0.997464 | 258 |
| HC33 | 48259 | 0.97 | 159.468421 | 158        | 2.677283 | 0.121754 | 0.999399 | 129 |
| HC46 | 48581 | 0.97 | 360.293984 | 370.103448 | 3.225528 | 0.097792 | 0.998744 | 307 |
| HC64 | 20375 | 0.97 | 417.67523  | 448.666667 | 3.524135 | 0.074812 | 0.995632 | 330 |
| HC48 | 38077 | 0.97 | 224.490854 | 219.75     | 2.70663  | 0.108204 | 0.998897 | 189 |
| HC70 | 26236 | 0.97 | 253.711772 | 252.285714 | 3.187389 | 0.081865 | 0.99817  | 212 |
| HC69 | 31277 | 0.97 | 568.900106 | 555.238095 | 3.898989 | 0.04539  | 0.996355 | 453 |
| HC68 | 26650 | 0.97 | 463.509257 | 466.326087 | 3.420466 | 0.09472  | 0.996323 | 363 |
| HC67 | 16960 | 0.97 | 465.98105  | 456.245283 | 3.486675 | 0.094505 | 0.994399 | 372 |
| HC66 | 27806 | 0.97 | 430.541901 | 407.684211 | 4.024016 | 0.040734 | 0.997303 | 359 |
| HC65 | 30941 | 0.97 | 461.819347 | 455.456522 | 3.821259 | 0.053192 | 0.997221 | 376 |
| HC22 | 26985 | 0.97 | 309.814028 | 296.486486 | 2.959706 | 0.134562 | 0.997628 | 242 |
| HC63 | 33145 | 0.97 | 323.225233 | 321.529412 | 3.383005 | 0.081377 | 0.998401 | 281 |
| HC62 | 28400 | 0.97 | 715.825163 | 668.714286 | 4.59394  | 0.021266 | 0.995458 | 595 |
| HC61 | 32275 | 0.97 | 571.320748 | 554.243243 | 3.917529 | 0.05288  | 0.996871 | 486 |
| HC47 | 27320 | 0.97 | 494.229207 | 483.52459  | 4.225479 | 0.03128  | 0.996889 | 425 |
| HC60 | 27690 | 0.97 | 568.028435 | 559.175439 | 4.236414 | 0.033864 | 0.996027 | 454 |
| HC58 | 20528 | 0.97 | 588.686109 | 528.9      | 4.006054 | 0.042736 | 0.994641 | 409 |
| HC57 | 27335 | 0.97 | 247.555504 | 239.037037 | 2.805246 | 0.135315 | 0.998281 | 199 |
| HC56 | 32701 | 0.97 | 473.857231 | 456.766667 | 3.882773 | 0.044683 | 0.997645 | 408 |
| HC55 | 39344 | 0.97 | 316.951839 | 350.315789 | 3.193653 | 0.102837 | 0.99845  | 254 |
| HC54 | 38305 | 0.97 | 592.884815 | 594.28125  | 3.921788 | 0.049251 | 0.997181 | 504 |
| HC53 | 44194 | 0.97 | 530.844433 | 514.166667 | 3.413747 | 0.108859 | 0.997715 | 430 |
| HC52 | 58951 | 0.97 | 502.221417 | 496.75     | 3.517711 | 0.081796 | 0.998507 | 417 |
| HC51 | 19480 | 0.97 | 431.23625  | 448.885714 | 2.876104 | 0.204435 | 0.995175 | 324 |
| HC50 | 11470 | 0.97 | 688.576422 | 641.507353 | 4.538892 | 0.031614 | 0.987969 | 572 |
| HC49 | 34415 | 0.97 | 458.843742 | 443.323077 | 3.649536 | 0.063967 | 0.997908 | 404 |
| HC59 | 23282 | 0.97 | 443.003304 | 452        | 3.213697 | 0.168716 | 0.996134 | 363 |
| HC21 | 23180 | 0.97 | 433.42823  | 432.456522 | 3.162363 | 0.182562 | 0.99629  | 353 |
| HC03 | 17808 | 0.97 | 344.701175 | 354.833333 | 3.543382 | 0.068325 | 0.996013 | 272 |
| HC19 | 17721 | 0.97 | 624.322064 | 580.8      | 3.68779  | 0.081814 | 0.992833 | 403 |
| HC20 | 17879 | 0.97 | 374.788295 | 382.428571 | 3.732578 | 0.058471 | 0.995749 | 301 |
| HC01 | 28843 | 0.97 | 314.942093 | 304.775    | 2.982648 | 0.158327 | 0.998128 | 269 |
| HC02 | 33528 | 0.97 | 460.774937 | 489.4      | 2.919019 | 0.136878 | 0.997107 | 373 |
| HC71 | 22490 | 0.97 | 500.511174 | 484.942857 | 4.081269 | 0.041248 | 0.996043 | 429 |
| HC04 | 53199 | 0.97 | 203.325936 | 198.75     | 2.465395 | 0.154366 | 0.999342 | 169 |
| HC05 | 18887 | 0.97 | 249.417898 | 200.4      | 1.979459 | 0.237026 | 0.997406 | 122 |
| HC06 | 56364 | 0.97 | 607.884619 | 623.375    | 3.185692 | 0.148643 | 0.997924 | 482 |
| HC07 | 22630 | 0.97 | 338.079617 | 324.634146 | 3.281583 | 0.091675 | 0.997304 | 280 |
| HC08 | 19588 | 0.97 | 550.044933 | 565.5      | 4.36068  | 0.024168 | 0.994027 | 435 |
| HC72 | 52976 | 0.97 | 545.729772 | 536.666667 | 4.388923 | 0.025482 | 0.99849  | 484 |
| HC10 | 43118 | 0.97 | 114.224904 | 124.666667 | 2.121554 | 0.220771 | 0.999606 | 102 |
| HC11 | 30464 | 0.97 | 377.51361  | 383.27027  | 2.952224 | 0.163657 | 0.997702 | 318 |
| HC12 | 20852 | 0.97 | 476.278233 | 486.634146 | 3.131816 | 0.198998 | 0.995108 | 361 |
| HC13 | 22885 | 0.97 | 511.349824 | 552.081081 | 3.86715  | 0.052113 | 0.995237 | 393 |
| HC14 | 46259 | 0.97 | 258.954262 | 250.935484 | 2.371419 | 0.19132  | 0.999027 | 219 |
| HC15 | 28032 | 0.97 | 380.151853 | 396.551724 | 3.453789 | 0.086096 | 0.997217 | 293 |
| HC16 | 22164 | 0.97 | 440.473132 | 446.512195 | 3.844077 | 0.049455 | 0.995984 | 351 |
| HC17 | 40105 | 0.97 | 460.418069 | 456.625    | 3.885085 | 0.043591 | 0.997905 | 384 |
| HC09 | 21164 | 0.97 | 414.955238 | 418.216216 | 3.504463 | 0.102895 | 0.996031 | 324 |
| HC18 | 22605 | 0.97 | 308.712455 | 315.777778 | 3.577977 | 0.053086 | 0.997301 | 248 |

Table S30. The abundance and composition at the genus and phylum level of each sample among CP (n=36), SP (n=23), and HC (n=72) groups.

| ID                                   | CP25     | CP26     | CP32     | CP36     | CP34     | CP20     | CP33     | CP10     | CP07     | CP18     | CP27     |
|--------------------------------------|----------|----------|----------|----------|----------|----------|----------|----------|----------|----------|----------|
| Bacteroides                          | 0.723215 | 0.675336 | 0.5718   | 0.504231 | 0.438893 | 0.322012 | 0.278372 | 0.247034 | 0.18228  | 0.127271 | 0.0979   |
| Subdoligranulum                      | 0.049507 | 0.072544 | 7.20E-05 | 0.029256 | 2.00E-05 | 6.02E-04 | 0.07897  | 0.001168 | 0        | 0.75057  | 0.115172 |
| Faecalibacterium                     | 0.007573 | 0.028523 | 5.00E-05 | 0.006981 | 0        | 0.340668 | 0        | 0.136444 | 0        | 0        | 0.233153 |
| Lachnospiraceae_incertae_sedis       | 0.020203 | 0.040174 | 0.029211 | 0.097051 | 0.242225 | 0.176061 | 0.160445 | 0.150114 | 2.30E-05 | 2.09E-04 | 0.246649 |
| Blautia                              | 0.003013 | 0.020987 | 0.075459 | 0.042651 | 0.036549 | 0.004777 | 0.012784 | 0.007811 | 0.169598 | 5.90E-05 | 0.017046 |
| Escherichia-Shigella                 | 0.005271 | 3.03E-04 | 4.00E-05 | 0.043374 | 0.064604 | 0.035629 | 0.045804 | 0.246077 | 0.513772 | 0.005694 | 6.50E-05 |
| Prevotella                           | 0.06441  | 0        | 0        | 2.60E-05 | 0.036476 | 0        | 3.80E-05 | 0.001657 | 0        | 0.001213 | 0.032049 |
| Ruminococcaceae_uncultured           | 0.001436 | 0.018735 | 6.69E-04 | 0.009356 | 1.04E-04 | 0.002799 | 0.028697 | 3.58E-04 | 7.59E-04 | 2.22E-04 | 0.00543  |
| Akkermansia                          | 0        | 8.00E-05 | 0        | 0        | 0        | 0        | 0.030877 | 0        | 3.90E-05 | 2.80E-05 | 0.013109 |
| Enterococcus                         | 0        | 0        | 0        | 0        | 0        | 0        | 0        | 0.003824 | 0        | 0        | 0        |
| Pseudobutyrvibrio                    | 0        | 0.052329 | 2.30E-05 | 0.026756 | 0        | 2.40E-05 | 5.02E-04 | 3.10E-05 | 0        | 0        | 0.045922 |
| Megamonas                            | 0.021969 | 0.00844  | 0        | 0        | 0        | 0        | 0.002734 | 2.42E-04 | 0        | 0        | 1.50E-05 |
| Streptococcus                        | 2.23E-04 | 2.10E-05 | 3.59E-04 | 0.005751 | 0.002059 | 2.71E-04 | 0.049904 | 5.60E-05 | 1.62E-04 | 0.037366 | 1.70E-04 |
| Bifidobacterium                      | 0.00142  | 0        | 0        | 0        | 2.30E-05 | 0        | 0        | 0.032838 | 0        | 0        | 3.60E-05 |
| Roseburia                            | 0.035986 | 0.015125 | 0.002482 | 0.042314 | 0        | 0        | 0.007726 | 0        | 0        | 0        | 0.001575 |
| Erysipelotrichaceae_incertae_sedis   | 3.89E-04 | 6.55E-04 | 0.012067 | 0.002995 | 0.004365 | 7.56E-04 | 4.80E-05 | 0.002694 | 5.90E-04 | 0.060204 | 0.005209 |
| Lachnospiraceae_unclassified         | 2.46E-04 | 0.012705 | 0.004393 | 0.01103  | 0.007686 | 0.002037 | 0.00249  | 0.001076 | 4.80E-05 | 2.70E-05 | 0.007627 |
| Ruminococcaceae_unclassified         | 9.72E-04 | 0.003833 | 0        | 0.00122  | 3.72E-04 | 4.91E-04 | 0        | 0.073622 | 0        | 0        | 0.082521 |
| Alistipes                            | 3.40E-05 | 0.003887 | 6.19E-04 | 0.004781 | 3.26E-04 | 0.008743 | 0.036546 | 0.003935 | 1.50E-05 | 1.78E-04 | 0.011905 |
| Anaerostipes                         | 2.80E-05 | 0.002491 | 0.00798  | 0.022353 | 5.66E-04 | 0        | 0        | 0        | 3.40E-05 | 2.50E-05 | 0.015535 |
| Lachnospira                          | 0        | 0        | 0        | 1.19E-04 | 0        | 0        | 8.80E-05 | 0        | 0        | 1.52E-04 | 0        |
| Ruminococcus                         | 4.50E-04 | 0.007976 | 5.48E-04 | 0.026248 | 0        | 0        | 0        | 3.12E-04 | 0        | 0        | 0        |
| Lachnospiraceae_uncultured           | 0        | 0.004889 | 0.050165 | 0.020133 | 0.017715 | 0.004063 | 9.63E-04 | 0.006156 | 0        | 0        | 0.001901 |
| Peptostreptococcaceae_incertae_sedis | 0        | 5.50E-04 | 0        | 0        | 0.04185  | 1.70E-05 | 1.25E-04 | 0.003962 | 0.001688 | 0        | 1.55E-04 |
| Klebsiella                           | 0        | 0        | 0        | 0        | 0        | 3.90E-05 | 0        | 0        | 0        | 0        | 0        |
| Clostridium_sensu_stricto_1          | 0        | 0        | 0        | 0        | 0        | 0        | 0        | 0        | 0        | 9.80E-05 | 7.90E-05 |
| Phascolarctobacterium                | 0.010453 | 0.00199  | 0.003355 | 0.010815 | 0.011838 | 0        | 0.06149  | 5.91E-04 | 0.002891 | 0.002159 | 0.00488  |
| Dorea                                | 0.003803 | 0.002547 | 0.009408 | 0.006105 | 0.005735 | 0        | 0        | 1.41E-04 | 0        | 0.001118 | 0.003047 |
| Coprococcus                          | 0        | 0.001193 | 0.01783  | 0.003134 | 0.047243 | 0.003038 | 0        | 0.001906 | 0        | 0        | 5.24E-04 |
| Actinomyces                          | 8.00E-05 | 5.80E-05 | 8.00E-05 | 0        | 0.001517 | 0        | 1.66E-04 | 0        | 2.16E-04 | 1.03E-04 | 6.01E-04 |
| Dialister                            | 0        | 0        | 0        | 0        | 0        | 0        | 7.12E-04 | 0.001928 | 0        | 0        | 9.70E-05 |
| Rothia                               | 7.00E-05 | 2.20E-05 | 2.30E-05 | 0.002074 | 1.53E-04 | 0        | 5.70E-05 | 0        | 2.40E-05 | 0.001873 | 4.20E-05 |
| Parabacteroides                      | 0.005651 | 0        | 0.005082 | 0.004777 | 0.003819 | 0.018646 | 0.012309 | 0.007836 | 0        | 0.002299 | 9.38E-04 |
| Erysipelotrichaceae_uncultured       | 0        | 4.00E-05 | 0        | 0.00345  | 0        | 1.26E-04 | 5.10E-05 | 0.00516  | 0        | 0        | 0        |
| Parasutterella                       | 0.005917 | 0        | 0.111454 | 0        | 0        | 0        | 9.90E-04 | 0.026959 | 0        | 0        | 0        |
| Megasphaera                          | 0        | 0        | 0        | 0        | 0        | 0        | 0.001443 | 6.60E-05 | 0        | 0        | 0        |
| Ruminococcaceae_incertae_sedis       | 6.76E-04 | 0.0121   | 0.016755 | 0.00456  | 0.018386 | 0.001991 | 0.001796 | 0.002995 | 0        | 1.70E-04 | 0.024267 |
| Veillonella                          | 4.20E-05 | 8.20E-04 | 6.04E-04 | 0.003007 | 2.55E-04 | 7.30E-05 | 0.003483 | 5.46E-04 | 0.01536  | 2.30E-05 | 0.001799 |
| Halomonas                            | 6.80E-05 | 6.62E-04 | 0.004669 | 0.00372  | 7.50E-04 | 9.09E-04 | 2.55E-04 | 0.001086 | 0.002449 | 0.002822 | 0.007796 |
| Christensenellaceae_uncultured       | 0        | 0        | 0        | 2.00E-05 | 0        | 0        | 0        | 0        | 0        | 0        | 0        |
| Lactobacillus                        | 0        | 0        | 0        | 0.026665 | 0        | 0        | 0        | 0        | 0.100317 | 0.002933 | 0        |
| Bacteria_unclassified                | 0.003591 | 9.85E-04 | 6.78E-04 | 3.58E-04 | 9.80E-04 | 1.99E-04 | 7.46E-04 | 2.31E-04 | 1.40E-04 | 7.90E-05 | 5.88E-04 |
| Clostridiales_unclassified           | 4.40E-05 | 4.94E-04 | 0        | 2.89E-04 | 0.004209 | 8.80E-05 | 3.91E-04 | 8.50E-05 | 0        | 0        | 9.63E-04 |
| Asteroleplasma                       | 0        | 0        | 0        | 0        | 0        | 0        | 0        | 0        | 0        | 0        | 0        |
| Sutterella                           | 0        | 0        | 0        | 0        | 0        | 0.002262 | 0.003275 | 0        | 1.34E-04 | 0        | 0        |
| Anaerotruncus                        | 1.90E-04 | 0.001112 | 0        | 2.09E-04 | 6.58E-04 | 8.59E-04 | 0.013114 | 1.57E-04 | 0        | 0        | 0.001264 |
| Barnesiella                          | 0        | 0        | 0        | 0        | 0        | 0        | 0        | 3.77E-04 | 0        | 0        | 0        |
| Paraprevotella                       | 0        | 0        | 0        | 0.025159 | 0.004736 | 0        | 0        | 3.20E-05 | 0        | 7.20E-05 | 0.005675 |
| Defluviitaleaceae_incertae_sedis     | 0        | 0        | 0        | 0        | 7.10E-05 | 0.020571 | 3.14E-04 | 0        | 0        | 0        | 0        |
| Fusobacterium                        | 0.026589 | 0        | 0.059216 | 0        | 8.31E-04 | 6.90E-05 | 0.009975 | 0        | 0.003799 | 8.20E-05 | 1.90E-05 |
| Flavonifractor                       | 0.002747 | 2.54E-04 | 0        | 0.001792 | 9.01E-04 | 0.036355 | 0.00363  | 0.010804 | 0        | 0        | 0        |
| Raoultella                           | 0        | 0        | 0        | 0        | 0        | 0        | 4.40E-05 | 0.002638 | 3.00E-05 | 0        | 0        |
| Desulfovibrio                        | 0        | 0        | 0        | 0        | 0        | 0        | 0.009316 | 8.80E-05 | 0        | 0        | 0        |
| Acidaminococcus                      | 0        | 0        | 0        | 0        | 2.90E-05 | 0        | 0.081088 | 0        | 0        | 0        | 0        |
| S24-7_norank                         | 0        | 0        | 0        | 0        | 0        | 0        | 0.04054  | 0        | 0        | 6.20E-05 | 0        |
| Bacteroidales_unclassified           | 3.31E-04 | 2.50E-05 | 3.50E-05 | 1.80E-05 | 0.002111 | 4.00E-05 | 0.001373 | 3.10E-05 | 0        | 0        | 2.80E-05 |

|                               |          |          |          |          |          |          |          |          |          |          |          |
|-------------------------------|----------|----------|----------|----------|----------|----------|----------|----------|----------|----------|----------|
| Peptostreptococcus            | 0        | 0        | 0        | 0        | 0        | 0        | 0        | 0        | 0        | 9.10E-05 | 2.10E-05 |
| Alloprevotella                | 0.001893 | 0        | 0        | 0        | 0        | 0        | 0        | 0        | 0        | 0        | 0        |
| Defluviitaleaceae_uncultured  | 4.24E-04 | 7.10E-04 | 0        | 8.27E-04 | 2.59E-04 | 0        | 0        | 0        | 0        | 0        | 2.28E-04 |
| Butyrivibrio                  | 0        | 0        | 0        | 0        | 0        | 0        | 0        | 0        | 0        | 0        | 2.10E-05 |
| Eubacterium                   | 0        | 0        | 0        | 0        | 0        | 0        | 1.08E-04 | 0        | 0        | 0        | 0        |
| Odoribacter                   | 0        | 8.52E-04 | 0        | 0        | 2.00E-05 | 0        | 0        | 0        | 0        | 0        | 9.80E-05 |
| Atopobium                     | 0        | 0        | 5.00E-05 | 0        | 5.20E-05 | 0        | 1.50E-04 | 0        | 0        | 6.00E-05 | 6.20E-05 |
| Gastranaerophilales_norank    | 0        | 0        | 0        | 0        | 0        | 0        | 0        | 0        | 0        | 0        | 0        |
| Haemophilus                   | 0        | 2.52E-04 | 0.002555 | 4.70E-05 | 0        | 0        | 7.96E-04 | 0        | 0        | 6.30E-05 | 0.002605 |
| Citrobacter                   | 0        | 0        | 0        | 0        | 0        | 0        | 1.36E-04 | 0        | 0        | 0        | 0        |
| Candidate_division_TM7_norank | 2.70E-05 | 9.80E-05 | 0        | 2.75E-04 | 9.20E-05 | 7.30E-05 | 4.64E-04 | 0        | 3.42E-04 | 0        | 0.002779 |
| RC9_gut_group                 | 0        | 0        | 0        | 0        | 0        | 0        | 0        | 0        | 0        | 0        | 0        |
| Granulicatella                | 0        | 0        | 4.20E-05 | 1.43E-04 | 2.40E-05 | 2.00E-05 | 1.60E-04 | 0        | 1.05E-04 | 2.90E-05 | 0        |
| Porphyromonas                 | 0        | 0        | 0        | 0        | 0        | 0.001224 | 0        | 0        | 1.80E-05 | 0        | 4.00E-05 |
| Pelagibacterium               | 0        | 4.80E-05 | 6.74E-04 | 4.11E-04 | 4.70E-05 | 2.10E-05 | 0        | 1.30E-04 | 2.19E-04 | 3.41E-04 | 9.55E-04 |
| Solobacterium                 | 0        | 7.40E-05 | 4.70E-05 | 0        | 2.30E-05 | 0        | 4.40E-05 | 0        | 1.13E-04 | 3.20E-05 | 1.95E-04 |
| Coprobacter                   | 0        | 0        | 0        | 0        | 0        | 0        | 0.003327 | 0        | 0        | 0        | 0.002532 |
| Anaerofilum                   | 0        | 0        | 0        | 0        | 0        | 0        | 0        | 0.011856 | 0        | 0        | 1.66E-04 |
| Anaeroplasm                   | 0        | 0        | 0        | 0        | 0        | 0        | 0        | 0        | 0        | 0        | 0        |
| Others                        | 0.001059 | 0.006081 | 0.011506 | 0.005519 | 0.001428 | 0.014447 | 0.011144 | 0.004946 | 0.004835 | 0.002273 | 0.004547 |

| CP14     | CP22     | CP12     | CP16     | CP13     | CP19     | CP01     | CP09     | CP35     | CP29     | CP04     | CP28     | CP05     | CP30     | CP21     |
|----------|----------|----------|----------|----------|----------|----------|----------|----------|----------|----------|----------|----------|----------|----------|
| 0.089153 | 0.073991 | 0.071768 | 0.052478 | 0.025854 | 0.01871  | 0.018594 | 0.016724 | 0.01599  | 0.011917 | 0.01054  | 0.006326 | 0.004666 | 0.003566 | 0.003127 |
| 0.173749 | 0.192964 | 0.724186 | 6.30E-05 | 0.455911 | 0.256103 | 0.051749 | 0.162753 | 0.328878 | 0.002133 | 0.864536 | 0.001092 | 0.910001 | 3.49E-04 | 0        |
| 7.40E-05 | 0.197479 | 0        | 3.06E-04 | 0        | 1.92E-04 | 0.033667 | 4.90E-05 | 0.028481 | 7.46E-04 | 7.80E-05 | 4.09E-04 | 0.02605  | 0        | 0        |
| 0.102802 | 0.007873 | 0.017491 | 0.010055 | 0.056271 | 0.008311 | 0.011914 | 0.029645 | 0.033961 | 0.003178 | 0.014479 | 8.37E-04 | 0.030018 | 1.77E-04 | 0.001097 |
| 0.06639  | 0.013404 | 7.50E-04 | 0.049028 | 0.053037 | 0.004436 | 0.009518 | 0.332291 | 0.053412 | 0.00198  | 0.039029 | 3.28E-04 | 0.00142  | 2.50E-05 | 7.00E-05 |
| 0        | 1.99E-04 | 0.002029 | 0.087671 | 0.298976 | 0.445284 | 0.005206 | 0.001092 | 0.00462  | 0.001055 | 1.10E-05 | 6.84E-04 | 2.50E-05 | 1.18E-04 | 0.774821 |
| 0        | 0.344315 | 2.87E-04 | 0.001022 | 0        | 0        | 0        | 0        | 0.01713  | 5.53E-04 | 0        | 0.001174 | 0        | 8.10E-04 | 0        |
| 0.010727 | 0.002173 | 0.003197 | 0.02075  | 0.056967 | 0.002418 | 0.003521 | 0.03264  | 0.014352 | 5.53E-04 | 3.25E-04 | 2.08E-04 | 0.001032 | 2.70E-05 | 1.00E-04 |
| 2.15E-04 | 0        | 0.00151  | 0.709057 | 6.70E-05 | 0.23081  | 0.673565 | 3.20E-05 | 4.30E-05 | 9.00E-05 | 0.011336 | 2.40E-04 | 0        | 8.90E-05 | 0        |
| 0        | 1.90E-05 | 0.002752 | 0        | 0        | 0        | 0.003032 | 0        | 0        | 1.24E-04 | 0.017012 | 1.14E-04 | 0.005991 | 0        | 4.12E-04 |
| 0.105953 | 0.006675 | 5.70E-05 | 0.019074 | 0        | 2.00E-05 | 2.60E-05 | 0.016773 | 0.03806  | 4.64E-04 | 1.70E-05 | 1.77E-04 | 9.95E-04 | 0        | 0        |
| 2.30E-05 | 0.077966 | 3.65E-04 | 0        | 0        | 0        | 0        | 4.85E-04 | 0.030143 | 3.50E-05 | 0        | 3.08E-04 | 4.60E-05 | 3.63E-04 | 2.90E-05 |
| 0.01615  | 1.03E-04 | 0.001806 | 0.002874 | 4.31E-04 | 0.001615 | 1.66E-04 | 0.001198 | 0.003005 | 0.357979 | 0.002508 | 0.474502 | 1.51E-04 | 0.630366 | 5.33E-04 |
| 0.013999 | 0        | 5.80E-05 | 1.80E-05 | 5.63E-04 | 6.10E-04 | 0.052184 | 0.023522 | 0        | 1.29E-04 | 1.60E-05 | 1.70E-04 | 0        | 4.80E-05 | 0        |
| 0.037571 | 1.45E-04 | 2.09E-04 | 0.007318 | 0        | 0        | 3.40E-05 | 0.055761 | 0.004774 | 8.13E-04 | 0        | 4.30E-04 | 0.001014 | 2.46E-04 | 0        |
| 0.029308 | 9.65E-04 | 0.144319 | 0.014924 | 0.004442 | 0.012989 | 0.001971 | 0.011369 | 0.00115  | 1.09E-04 | 0.00481  | 5.80E-05 | 9.46E-04 | 0        | 0.010155 |
| 0.016377 | 9.91E-04 | 1.62E-04 | 4.06E-04 | 0.001036 | 0        | 6.99E-04 | 0.003395 | 0.014651 | 2.75E-04 | 1.75E-04 | 1.50E-04 | 0.001468 | 0        | 0        |
| 7.72E-04 | 0.045382 | 0        | 2.12E-04 | 6.95E-04 | 9.90E-05 | 0.00713  | 1.10E-04 | 0.008535 | 6.50E-05 | 0        | 9.90E-05 | 0.006658 | 2.00E-05 | 0        |
| 5.49E-04 | 0        | 0.002359 | 0.002195 | 0.005098 | 7.10E-05 | 0.001527 | 8.50E-05 | 0.001211 | 3.98E-04 | 5.90E-05 | 2.02E-04 | 4.30E-05 | 0        | 0        |
| 0.187197 | 3.60E-05 | 6.80E-05 | 0.001436 | 3.20E-05 | 0        | 7.45E-04 | 0.004967 | 0.001023 | 4.57E-04 | 3.30E-05 | 6.60E-05 | 5.60E-05 | 0        | 0        |
| 0.006624 | 0        | 1.40E-05 | 4.60E-05 | 0        | 0        | 0        | 0        | 0.036194 | 0        | 0        | 0        | 0        | 0        | 0        |
| 0        | 1.80E-05 | 5.90E-05 | 0        | 0.012286 | 0.001336 | 4.30E-05 | 0        | 0        | 3.79E-04 | 0        | 8.60E-05 | 2.30E-05 | 0        | 0        |
| 0.009833 | 0.001081 | 1.48E-04 | 2.02E-04 | 7.10E-05 | 0        | 2.40E-04 | 8.35E-04 | 0.007575 | 1.54E-04 | 0.001759 | 1.26E-04 | 4.13E-04 | 0        | 0        |
| 0.002645 | 0.005545 | 0        | 0        | 0.001947 | 0        | 3.39E-04 | 0.003237 | 0.284332 | 1.38E-04 | 0        | 6.40E-05 | 0        | 4.60E-05 | 0        |
| 0        | 0        | 0        | 0        | 4.78E-04 | 0        | 0        | 0        | 5.10E-05 | 0        | 0        | 0        | 0        | 0        | 0.184056 |
| 2.30E-05 | 0        | 0        | 0        | 0        | 0        | 0        | 0        | 0.002059 | 0        | 2.00E-05 | 4.72E-04 | 0        | 2.57E-04 | 0        |
| 3.98E-04 | 1.50E-05 | 0.001948 | 4.90E-05 | 2.15E-04 | 0        | 8.37E-04 | 0        | 2.20E-05 | 4.90E-04 | 7.00E-05 | 1.16E-04 | 0        | 3.90E-04 | 7.48E-04 |
| 0.013597 | 7.50E-05 | 0        | 9.09E-04 | 9.00E-05 | 0        | 9.00E-05 | 0.066405 | 0.020746 | 1.62E-04 | 1.75E-04 | 9.60E-05 | 0.003521 | 0        | 0        |
| 0.013171 | 3.20E-05 | 3.43E-04 | 0.001051 | 0.005609 | 0        | 1.77E-04 | 0.02798  | 0.001988 | 2.25E-04 | 0        | 8.30E-05 | 5.75E-04 | 0        | 0        |
| 3.68E-04 | 0        | 0.001378 | 6.08E-04 | 0        | 2.70E-04 | 0        | 3.56E-04 | 2.49E-04 | 0.101024 | 0.003965 | 0.291646 | 5.06E-04 | 0.168581 | 0.002362 |
| 8.30E-05 | 1.70E-05 | 3.50E-05 | 3.74E-04 | 0        | 2.50E-05 | 7.00E-05 | 1.66E-04 | 0.002086 | 1.20E-05 | 0        | 0        | 0        | 4.80E-05 | 0        |
| 7.09E-04 | 2.60E-05 | 3.60E-05 | 7.40E-04 | 1.76E-04 | 8.95E-04 | 3.30E-05 | 6.63E-04 | 0        | 0.346052 | 5.46E-04 | 0.036969 | 4.60E-05 | 0.107765 | 2.24E-04 |
| 0.001184 | 0.003368 | 0.001009 | 0.001631 | 4.57E-04 | 7.10E-05 | 7.16E-04 | 2.60E-05 | 7.81E-04 | 2.01E-04 | 2.56E-04 | 8.40E-05 | 7.20E-05 | 6.80E-05 | 0        |
| 0        | 0        | 4.44E-04 | 0        | 0        | 1.15E-04 | 0        | 0.136575 | 0.007889 | 3.50E-05 | 0.002667 | 0        | 0        | 0        | 0        |
| 0        | 0        | 3.70E-05 | 8.68E-04 | 7.23E-04 | 4.60E-05 | 1.34E-04 | 0        | 9.11E-04 | 3.00E-05 | 0        | 3.30E-05 | 4.40E-05 | 2.50E-05 | 0        |
| 0        | 0        | 1.87E-04 | 2.20E-05 | 0        | 0        | 0        | 0        | 0        | 2.26E-04 | 0        | 1.33E-04 | 2.50E-05 | 0.001732 | 0        |
| 0.072083 | 9.30E-05 | 0.005785 | 0.001448 | 9.11E-04 | 2.84E-04 | 0.003699 | 0.006479 | 0.004628 | 1.47E-04 | 9.10E-05 | 1.51E-04 | 0.001794 | 0        | 0        |
| 0.001971 | 4.58E-04 | 1.58E-04 | 2.10E-05 | 0        | 1.42E-04 | 0.032395 | 1.37E-04 | 5.40E-05 | 0.022174 | 6.20E-05 | 0.008818 | 0        | 0.002366 | 4.54E-04 |
| 3.97E-04 | 0.005945 | 0.004937 | 4.81E-04 | 0.001124 | 0.001954 | 2.14E-04 | 0.009757 | 0.001745 | 0.005929 | 0.006584 | 0.138137 | 5.37E-04 | 0.009568 | 0.002019 |
| 0        | 0        | 0        | 0        | 0        | 0        | 0.003004 | 0        | 0.003167 | 0        | 0        | 0        | 0        | 0        | 0        |
| 0        | 3.40E-05 | 6.40E-05 | 0.001471 | 0        | 0        | 0        | 2.80E-05 | 2.50E-05 | 0.007927 | 0        | 1.29E-04 | 0        | 7.20E-05 | 0        |
| 7.18E-04 | 2.34E-04 | 0.001071 | 0.001006 | 7.60E-05 | 0        | 3.00E-05 | 4.70E-05 | 4.80E-05 | 0        | 4.24E-04 | 0        | 2.80E-05 | 1.39E-04 | 0        |
| 0.002143 | 3.77E-04 | 1.62E-04 | 0        | 4.00E-04 | 4.10E-05 | 2.64E-04 | 0.003161 | 0.006488 | 0        | 0.001638 | 0        | 9.50E-05 | 0        | 0        |
| 0        | 0        | 0        | 0        | 0        | 0        | 0        | 0        | 0        | 0        | 0        | 0        | 0        | 0        | 0        |
| 3.30E-05 | 8.88E-04 | 8.20E-05 | 0        | 0        | 0        | 0        | 0        | 0        | 1.40E-05 | 0        | 0        | 0        | 0        | 0        |
| 0.001924 | 1.56E-04 | 5.16E-04 | 0.00124  | 2.48E-04 | 3.30E-05 | 9.60E-05 | 8.30E-05 | 0.010557 | 6.90E-05 | 0        | 0        | 6.20E-05 | 0        | 0        |
| 0        | 0        | 0        | 0        | 0.004431 | 0        | 0.002439 | 0        | 0        | 0        | 0        | 0        | 0        | 0        | 0        |
| 0        | 0.011308 | 0        | 0        | 0        | 0        | 0        | 7.10E-05 | 3.94E-04 | 2.32E-04 | 0        | 8.10E-05 | 0        | 0        | 0        |
| 0        | 0        | 2.80E-05 | 0        | 0        | 0        | 5.80E-05 | 0.028261 | 0        | 0        | 2.20E-05 | 0        | 0        | 0        | 0        |
| 9.91E-04 | 6.97E-04 | 7.51E-04 | 0        | 0        | 6.70E-05 | 0        | 0        | 2.20E-05 | 1.94E-04 | 1.20E-05 | 1.85E-04 | 0        | 3.07E-04 | 0        |
| 0.011082 | 6.31E-04 | 2.45E-04 | 0        | 0.003558 | 0        | 0.001327 | 9.60E-05 | 8.40E-05 | 4.70E-05 | 0        | 1.40E-05 | 0        | 0        | 0        |
| 0        | 0        | 0        | 0        | 3.30E-05 | 4.10E-05 | 4.10E-05 | 0        | 0        | 0        | 2.30E-05 | 5.90E-05 | 0        | 0        | 0.016563 |
| 0        | 8.74E-04 | 4.55E-04 | 0        | 0        | 2.60E-05 | 0        | 0        | 1.57E-04 | 6.60E-05 | 0        | 0        | 0        | 0        | 0        |
| 0        | 0        | 0.002302 | 0        | 0        | 0        | 0        | 0        | 0        | 2.22E-04 | 0        | 6.90E-05 | 0        | 0        | 0        |
| 0        | 0        | 0.001893 | 0        | 0        | 0        | 0        | 0        | 0        | 1.79E-04 | 0        | 1.80E-05 | 0        | 0        | 0        |
| 0        | 4.10E-05 | 5.60E-05 | 0        | 3.10E-05 | 0        | 0        | 0        | 0        | 0        | 0        | 0        | 0        | 0        | 0        |

|          |          |          |          |          |          |          |          |          |          |          |          |          |          |          |
|----------|----------|----------|----------|----------|----------|----------|----------|----------|----------|----------|----------|----------|----------|----------|
| 3.40E-04 | 1.70E-05 | 0        | 3.56E-04 | 0        | 0        | 0.039639 | 3.66E-04 | 0        | 0.063338 | 4.90E-05 | 1.20E-04 | 5.40E-05 | 0.0091   | 0        |
| 0        | 0        | 0        | 0        | 0        | 0        | 0        | 0        | 0.002833 | 0        | 0        | 9.80E-05 | 0        | 2.08E-04 | 0        |
| 0        | 0        | 0        | 0.001107 | 0        | 0        | 0        | 0        | 0        | 0        | 0        | 4.90E-05 | 0        | 0        | 0        |
| 0        | 0        | 0        | 0        | 6.72E-04 | 0        | 0        | 0        | 2.20E-05 | 0        | 0        | 0        | 0        | 0        | 0        |
| 0        | 0        | 0        | 0        | 0        | 0.006658 | 0.001179 | 0        | 0        | 0        | 0.01072  | 0        | 0        | 0        | 0        |
| 0        | 0        | 0        | 0        | 3.83E-04 | 0        | 5.30E-05 | 5.10E-05 | 0        | 0        | 0        | 3.20E-05 | 0        | 0        | 0        |
| 9.50E-05 | 0        | 0        | 1.38E-04 | 4.00E-05 | 2.00E-05 | 0        | 0        | 1.37E-04 | 0.006647 | 3.26E-04 | 4.17E-04 | 2.30E-05 | 0.036283 | 1.74E-04 |
| 0        | 0        | 0        | 0        | 0        | 0        | 0        | 0        | 0        | 0        | 0        | 0        | 0        | 0        | 0        |
| 1.75E-04 | 5.20E-05 | 3.50E-05 | 2.40E-05 | 0        | 0        | 0        | 2.10E-05 | 2.70E-05 | 0        | 0        | 2.00E-05 | 0        | 0        | 0        |
| 0        | 0        | 0        | 0        | 3.40E-05 | 0        | 0        | 0        | 0        | 0        | 0        | 0        | 0        | 0        | 0.001116 |
| 3.37E-04 | 1.21E-04 | 0        | 2.30E-05 | 4.10E-05 | 1.13E-04 | 0        | 5.08E-04 | 4.26E-04 | 0.011503 | 2.50E-05 | 0        | 5.08E-04 | 0.001833 | 5.80E-04 |
| 0        | 0        | 0        | 0        | 0        | 0        | 0        | 0        | 0        | 0        | 0        | 0        | 0        | 0        | 0        |
| 1.57E-04 | 2.20E-05 | 0        | 3.10E-05 | 0        | 2.78E-04 | 9.30E-05 | 0        | 4.80E-05 | 1.56E-04 | 3.29E-04 | 0        | 2.20E-05 | 0.011094 | 0        |
| 0        | 0        | 0        | 0        | 0        | 0        | 0.033805 | 0        | 0        | 0        | 0        | 5.10E-05 | 0        | 0        | 0        |
| 6.20E-05 | 4.20E-04 | 5.18E-04 | 1.40E-04 | 3.50E-05 | 5.31E-04 | 3.20E-05 | 9.15E-04 | 2.62E-04 | 0.002958 | 7.67E-04 | 0.011372 | 8.90E-05 | 0.001251 | 2.66E-04 |
| 4.63E-04 | 3.60E-05 | 0        | 9.70E-05 | 0        | 7.13E-04 | 3.40E-05 | 2.52E-04 | 2.06E-04 | 0.018173 | 7.00E-04 | 1.60E-05 | 0        | 6.80E-05 | 1.65E-04 |
| 0        | 0        | 1.23E-04 | 0        | 0        | 0        | 0        | 0        | 0        | 5.20E-05 | 0        | 0        | 0        | 0        | 0        |
| 2.40E-05 | 0        | 0        | 0        | 0        | 0        | 9.81E-04 | 0        | 0        | 0        | 0        | 0        | 0        | 0        | 0        |
| 0        | 0        | 0        | 0        | 0        | 0        | 0        | 0        | 0        | 0        | 0        | 0        | 0        | 0        | 0        |
| 0.007361 | 0.002739 | 0.001808 | 0.00703  | 0.006551 | 0.004673 | 0.00269  | 0.020633 | 0.004368 | 0.027792 | 0.003806 | 0.022682 | 9.83E-04 | 0.012595 | 9.29E-04 |

| CP08     | CP11     | CP06     | CP31     | CP03     | CP24     | CP17     | CP15     | CP02     | CP23     | SP23     | SP19     | SP24     | SP16     | SP15     |
|----------|----------|----------|----------|----------|----------|----------|----------|----------|----------|----------|----------|----------|----------|----------|
| 0.002575 | 0.001054 | 8.36E-04 | 5.41E-04 | 5.07E-04 | 4.44E-04 | 2.31E-04 | 1.53E-04 | 6.50E-05 | 2.50E-05 | 0.56084  | 0.430268 | 0.277642 | 0.276878 | 0.109043 |
| 0.081568 | 0.06721  | 0.922572 | 0        | 4.60E-04 | 0        | 0.003091 | 1.58E-04 | 8.85E-04 | 6.80E-05 | 0.012803 | 0.518115 | 0.025688 | 0.142956 | 0.100064 |
| 0.012779 | 7.63E-04 | 0.03504  | 6.70E-05 | 7.40E-05 | 0        | 0        | 0        | 9.50E-05 | 4.00E-05 | 0.001721 | 0        | 0        | 0.014302 | 0.015669 |
| 0.032404 | 0.002869 | 0.006005 | 3.60E-05 | 5.36E-04 | 3.60E-05 | 0.020696 | 0.638001 | 1.01E-04 | 0        | 0.138673 | 9.20E-05 | 0.001604 | 0.047428 | 0.025862 |
| 0.223586 | 0.00737  | 0.013917 | 1.32E-04 | 6.90E-05 | 0        | 0.038646 | 4.20E-05 | 3.28E-04 | 0        | 6.14E-04 | 2.80E-05 | 2.05E-04 | 0.064312 | 0.039503 |
| 0.009555 | 0.006111 | 0        | 0.988449 | 0.842888 | 6.60E-05 | 0.003791 | 0        | 0.004159 | 1.30E-05 | 2.80E-05 | 0        | 2.25E-04 | 2.05E-04 | 8.51E-04 |
| 0        | 2.60E-05 | 0.002773 | 0        | 3.40E-05 | 2.80E-05 | 0.002072 | 0        | 0        | 5.60E-05 | 0        | 0.046965 | 3.50E-05 | 2.50E-05 | 0        |
| 0.008267 | 0.00116  | 5.81E-04 | 0        | 0.0287   | 0        | 1.18E-04 | 0        | 3.70E-05 | 0        | 4.14E-04 | 0        | 0        | 0.045146 | 0.384491 |
| 3.10E-05 | 0.870406 | 0        | 0        | 0.005649 | 0        | 0.903709 | 4.50E-05 | 0        | 0        | 9.10E-05 | 0        | 0.002696 | 3.10E-05 | 0.021108 |
| 0        | 2.90E-05 | 0        | 5.90E-05 | 1.03E-04 | 0.9813   | 2.30E-05 | 0        | 0.00664  | 0.9747   | 0.186616 | 0        | 0.563614 | 0        | 0        |
| 0.100317 | 0        | 4.55E-04 | 6.10E-05 | 0        | 3.50E-05 | 1.60E-05 | 1.90E-05 | 1.65E-04 | 0        | 6.80E-05 | 0        | 0        | 3.02E-04 | 0.005528 |
| 0        | 0        | 8.28E-04 | 0.004943 | 0        | 0.008415 | 0        | 2.00E-05 | 1.01E-04 | 0        | 0        | 0        | 0        | 0        | 4.89E-04 |
| 0.004798 | 0        | 9.70E-05 | 6.00E-05 | 0.009209 | 0.002968 | 0.00277  | 0.062043 | 0.350637 | 0.005945 | 0.009708 | 8.52E-04 | 0.012034 | 6.00E-05 | 7.23E-04 |
| 0        | 2.50E-05 | 0        | 9.70E-05 | 2.70E-05 | 0        | 0        | 0        | 0.570012 | 0        | 3.29E-04 | 0        | 0        | 0.026438 | 0.050948 |
| 0.013814 | 4.75E-04 | 0.004007 | 8.00E-05 | 0        | 0        | 3.45E-04 | 0        | 3.40E-05 | 2.00E-05 | 3.40E-05 | 0        | 0        | 0.006699 | 0.003799 |
| 0.016373 | 8.39E-04 | 2.28E-04 | 0        | 0        | 3.10E-05 | 0.006518 | 0.083073 | 0        | 2.40E-05 | 0.002329 | 3.20E-05 | 6.84E-04 | 0.14122  | 0.001963 |
| 0.024748 | 0.032306 | 8.80E-05 | 0        | 0        | 0        | 1.74E-04 | 0.001518 | 0        | 0        | 3.48E-04 | 0        | 0        | 0.007037 | 0.002437 |
| 0.005678 | 3.37E-04 | 7.69E-04 | 3.40E-05 | 0        | 2.70E-05 | 0        | 0        | 0        | 2.40E-05 | 0.0013   | 0        | 0        | 0.007618 | 0.005135 |
| 0        | 0        | 9.70E-05 | 0        | 1.52E-04 | 0        | 0        | 0        | 0        | 0        | 0        | 0        | 3.39E-04 | 0.149435 | 0.046774 |
| 0.412912 | 9.90E-05 | 3.30E-05 | 0        | 0        | 0        | 9.40E-05 | 2.88E-04 | 3.20E-05 | 0        | 3.60E-05 | 2.50E-05 | 0        | 0.001933 | 0.004457 |
| 0        | 0        | 0        | 1.27E-04 | 0        | 0        | 0        | 0        | 1.29E-04 | 0        | 0        | 0        | 0        | 3.60E-05 | 1.62E-04 |
| 9.40E-05 | 0.002539 | 1.50E-05 | 0        | 0        | 0        | 0        | 0        | 0        | 0        | 1.43E-04 | 0        | 3.70E-05 | 0.008198 | 0.029967 |
| 3.28E-04 | 0        | 0.001522 | 0        | 0        | 0        | 0.001583 | 0        | 0        | 0        | 3.89E-04 | 0        | 1.98E-04 | 6.57E-04 | 0.003093 |
| 0        | 0        | 0        | 0        | 0.018822 | 6.20E-05 | 0        | 0.042653 | 8.45E-04 | 0        | 2.80E-05 | 0        | 0        | 5.67E-04 | 0.025615 |
| 0        | 0        | 0        | 0        | 0        | 0        | 0        | 3.80E-05 | 0        | 0        | 0        | 0        | 0        | 3.20E-05 | 0        |
| 0        | 0        | 0        | 0        | 0.05411  | 0        | 2.60E-05 | 0.085615 | 2.18E-04 | 0        | 5.10E-05 | 0        | 3.80E-05 | 0        | 0.003732 |
| 1.03E-04 | 0        | 2.40E-05 | 0        | 4.37E-04 | 0        | 2.90E-05 | 0        | 0        | 4.00E-05 | 0.001571 | 0        | 0.001285 | 9.10E-05 | 0.011535 |
| 0.024794 | 0.0022   | 1.90E-05 | 2.50E-05 | 0        | 0        | 0.005662 | 0        | 1.03E-04 | 0        | 1.72E-04 | 0        | 0        | 0.006201 | 0.005501 |
| 0.008427 | 1.68E-04 | 0.001255 | 3.20E-05 | 0        | 0        | 5.60E-05 | 0        | 3.40E-05 | 0        | 0        | 0        | 0        | 0.001324 | 0.002047 |
| 9.60E-04 | 6.20E-05 | 1.49E-04 | 0        | 1.43E-04 | 4.18E-04 | 1.80E-04 | 0.003321 | 0.005383 | 0        | 0.016122 | 0        | 0.003522 | 3.39E-04 | 7.40E-05 |
| 4.86E-04 | 0        | 0        | 3.40E-05 | 0        | 0        | 0        | 0        | 0        | 0        | 0        | 0        | 0        | 1.58E-04 | 0.001349 |
| 5.80E-05 | 0        | 4.70E-05 | 0        | 0        | 1.99E-04 | 9.73E-04 | 0.008486 | 0.007555 | 3.20E-05 | 0.015756 | 0        | 0.001113 | 0        | 1.30E-05 |
| 3.30E-05 | 0        | 0        | 2.51E-04 | 5.30E-05 | 3.40E-05 | 0        | 2.50E-05 | 0        | 0        | 0.008362 | 0        | 0.012146 | 0.009209 | 0.005257 |
| 0        | 0        | 0        | 0        | 0        | 0        | 0        | 0        | 0        | 0        | 8.90E-05 | 0        | 2.94E-04 | 0.002552 | 0.007122 |
| 0        | 0        | 0        | 0        | 0        | 0        | 0        | 0        | 0        | 0        | 2.70E-05 | 0        | 0        | 0        | 1.90E-05 |
| 0        | 0        | 0        | 4.40E-05 | 0        | 0        | 0        | 0        | 9.80E-05 | 3.10E-05 | 2.16E-04 | 0        | 6.70E-05 | 0        | 3.67E-04 |
| 0.001015 | 3.51E-04 | 3.23E-04 | 2.30E-05 | 0        | 0        | 9.24E-04 | 0        | 5.50E-05 | 0        | 0.001093 | 0        | 0        | 0.003495 | 0.007016 |
| 4.50E-05 | 0        | 0        | 1.29E-04 | 0.02221  | 3.40E-05 | 0        | 0.048057 | 0.011593 | 0.00216  | 4.44E-04 | 0        | 0.040213 | 0        | 0        |
| 0.002164 | 7.10E-05 | 5.57E-04 | 3.40E-05 | 3.59E-04 | 0        | 0.001148 | 0.004968 | 0.002135 | 0.012869 | 0.012781 | 1.46E-04 | 0.044148 | 4.97E-04 | 0.001084 |
| 3.00E-05 | 7.00E-04 | 0        | 0        | 0        | 0        | 0        | 0        | 0        | 0        | 0        | 0        | 0        | 0.001144 | 0.016286 |
| 7.20E-05 | 0        | 0        | 0        | 9.80E-05 | 4.75E-04 | 0        | 0        | 0.022134 | 0        | 0        | 0.002068 | 0        | 0        | 0        |
| 5.30E-05 | 0        | 1.47E-04 | 0        | 4.61E-04 | 0        | 0        | 0        | 3.40E-05 | 0        | 6.20E-05 | 0        | 0        | 7.32E-04 | 0.003782 |
| 0.001118 | 1.18E-04 | 0.001035 | 0        | 0        | 0        | 0        | 3.22E-04 | 6.80E-05 | 0        | 0        | 0        | 0        | 0.001683 | 0.001434 |
| 0        | 0        | 0        | 0        | 0        | 0        | 0        | 0        | 0        | 0        | 0        | 0        | 0        | 0        | 0        |
| 0        | 0        | 0        | 3.50E-05 | 0        | 0        | 0        | 0        | 0        | 0        | 0        | 0        | 0        | 7.41E-04 | 7.30E-05 |
| 0        | 0        | 4.80E-05 | 0        | 8.00E-05 | 0        | 0        | 0        | 6.20E-05 | 0        | 5.29E-04 | 0        | 0        | 0.014902 | 0.009507 |
| 0        | 3.30E-05 | 0.003727 | 0        | 3.60E-05 | 3.80E-05 | 0        | 0        | 0        | 0        | 0        | 0        | 0        | 0        | 0.003705 |
| 5.80E-05 | 3.20E-05 | 0        | 0        | 0        | 0        | 2.20E-05 | 0        | 0        | 0        | 0.001056 | 0        | 0        | 4.86E-04 | 0.001027 |
| 0        | 0        | 0        | 0        | 0        | 0        | 0        | 0        | 0        | 0        | 0        | 0        | 0        | 0        | 0        |
| 0        | 3.40E-05 | 0        | 0        | 3.70E-05 | 1.46E-04 | 0        | 0        | 0        | 0        | 0        | 0        | 0        | 0        | 0        |
| 0        | 0        | 1.82E-04 | 2.80E-05 | 0        | 0        | 0        | 0        | 0        | 0        | 0        | 0        | 0        | 0.003802 | 1.92E-04 |
| 0        | 0        | 0        | 0.004054 | 2.29E-04 | 0        | 0        | 0        | 0        | 0        | 0        | 0        | 0        | 0        | 0        |
| 0        | 0        | 0        | 0        | 3.30E-05 | 9.10E-05 | 0        | 0        | 0        | 0        | 0        | 0        | 0        | 4.21E-04 | 0.002519 |
| 0        | 0        | 0        | 3.00E-05 | 1.22E-04 | 0        | 0        | 0        | 0        | 2.60E-05 | 0        | 0        | 0        | 0        | 2.30E-04 |
| 0        | 0        | 0        | 0        | 1.49E-04 | 0        | 0        | 0        | 0        | 2.30E-05 | 0        | 0        | 0        | 0        | 0.002344 |
| 0        | 0        | 0        | 0        | 0        | 0        | 0        | 0        | 0        | 0        | 0        | 9.90E-05 | 0        | 3.65E-04 | 4.94E-04 |

|          |          |          |          |          |          |          |          |          |          |          |          |          |          |          |          |
|----------|----------|----------|----------|----------|----------|----------|----------|----------|----------|----------|----------|----------|----------|----------|----------|
|          | 0        | 0        | 0        | 0        | 0        | 0        | 6.50E-05 | 0        | 2.79E-04 | 1.26E-04 | 1.45E-04 | 0        | 2.33E-04 | 0        | 0        |
|          | 0        | 0        | 0        | 0        | 0        | 0        | 0        | 0        | 2.90E-05 | 0        | 0        | 0        | 0        | 0        | 0        |
|          | 0        | 0        | 3.40E-05 | 0        | 0        | 0        | 0        | 0        | 0        | 0        | 0        | 0        | 0        | 2.75E-04 | 7.04E-04 |
|          | 0        | 0        | 0        | 0        | 0        | 0        | 0        | 0        | 0        | 0        | 0        | 0        | 0        | 6.40E-05 | 0        |
| 0.001358 | 0        | 0        | 0        | 0        | 0        | 0        | 0.002084 | 0        | 0        | 0        | 0        | 0        | 9.30E-05 | 0        | 1.01E-04 |
| 2.90E-05 | 0        | 0        | 0        | 0        | 0        | 0        | 0        | 0        | 0        | 0        | 0        | 0        | 0        | 6.00E-05 | 4.53E-04 |
| 1.73E-04 | 0        | 0        | 0        | 0        | 4.70E-05 | 3.60E-05 | 0        | 9.05E-04 | 0.002213 | 4.80E-05 | 0.005579 | 2.50E-05 | 2.59E-04 | 0        | 2.70E-05 |
| 0        | 0        | 0        | 0        | 0        | 0        | 0        | 0        | 0        | 0        | 0        | 0        | 0        | 0        | 0        | 0        |
| 0        | 0        | 0        | 0        | 0        | 0.010164 | 0        | 0        | 0        | 0        | 0        | 3.90E-05 | 3.00E-05 | 3.30E-05 | 0        | 0        |
| 0        | 0        | 0        | 0        | 0        | 0        | 0        | 0        | 0        | 0        | 0        | 0        | 0        | 0        | 0        | 0        |
| 5.16E-04 | 0        | 2.93E-04 | 0        | 2.52E-04 | 0        | 4.67E-04 | 0        | 5.40E-05 | 0        | 0.006346 | 1.40E-04 | 3.00E-05 | 8.90E-05 | 2.80E-05 |          |
| 0        | 0        | 0        | 0        | 0        | 0        | 0        | 0        | 0        | 0        | 0        | 0        | 0        | 0        | 0        | 2.19E-04 |
| 1.58E-04 | 0        | 1.40E-05 | 0        | 3.50E-05 | 0.002165 | 8.90E-05 | 0.006364 | 0.008327 | 2.30E-05 | 4.00E-04 | 3.20E-05 | 0.002281 | 1.16E-04 | 0        |          |
| 0        | 0        | 0        | 0        | 0        | 0        | 0        | 0        | 0        | 0        | 0        | 0        | 0        | 0        | 0        | 8.00E-05 |
| 1.56E-04 | 0        | 4.90E-05 | 0        | 4.10E-05 | 0        | 9.80E-05 | 5.32E-04 | 1.65E-04 | 0.001701 | 0.001179 | 1.17E-04 | 0.001554 | 7.00E-05 | 1.11E-04 |          |
| 2.70E-04 | 0        | 0        | 0        | 1.75E-04 | 0        | 0.001327 | 7.70E-05 | 2.17E-04 | 2.30E-04 | 0.001716 | 1.24E-04 | 9.19E-04 | 2.05E-04 | 6.90E-05 |          |
| 0        | 0        | 0        | 0        | 0        | 0        | 0        | 0        | 0        | 0        | 0        | 0        | 0        | 0        | 0        | 0        |
| 0        | 0        | 3.90E-05 | 0        | 0        | 0        | 0        | 0        | 0        | 0        | 0        | 0        | 0        | 0        | 0.002458 | 0.005653 |
| 0        | 0        | 0        | 0        | 0        | 0        | 0        | 0        | 0        | 0        | 0        | 0        | 0        | 0        | 0        | 0        |
| 0.008097 | 0.002613 | 0.002195 | 5.95E-04 | 0.003499 | 0.002952 | 0.002973 | 0.013277 | 0.004979 | 0.001776 | 0.009753 | 8.42E-04 | 0.006771 | 0.007006 | 0.028165 |          |

| SP26     | SP02     | SP12     | SP27     | SP10     | SP14     | SP09     | SP22     | SP06     | SP08     | SP13     | SP21     | SP04     | SP03     | SP18     |
|----------|----------|----------|----------|----------|----------|----------|----------|----------|----------|----------|----------|----------|----------|----------|
| 0.037131 | 0.029651 | 0.02676  | 0.021362 | 0.013363 | 0.01069  | 0.010519 | 0.007876 | 0.004832 | 0.004587 | 0.002894 | 0.002724 | 0.00111  | 8.13E-04 | 3.68E-04 |
| 0.002087 | 0.307867 | 0.002286 | 0.334475 | 3.97E-04 | 1.46E-04 | 0.252137 | 0.653551 | 0.528367 | 0.434077 | 0.763194 | 0.545038 | 0.123773 | 0.968085 | 0.1251   |
| 0        | 0.166789 | 0        | 3.80E-05 | 0.041543 | 0.138197 | 0.34584  | 0        | 0.031942 | 0.048119 | 0.051932 | 0        | 0.258538 | 2.40E-05 | 0.094353 |
| 0.001719 | 0.017947 | 0.035568 | 0.121436 | 0.759714 | 0.073805 | 0.036737 | 2.40E-05 | 0.013594 | 0.010711 | 0.001944 | 0.016848 | 0.162979 | 5.60E-05 | 0.21538  |
| 0.798652 | 0.015701 | 9.09E-04 | 0.140178 | 0.004799 | 0.23571  | 0.063383 | 0        | 0.200187 | 0.31292  | 0.029934 | 0.167503 | 0.059735 | 5.10E-05 | 0.273129 |
| 0.075262 | 1.12E-04 | 0.809878 | 0.241992 | 0.00242  | 0.062224 | 0.004317 | 1.50E-05 | 0.074085 | 0.064034 | 8.12E-04 | 0.001354 | 0        | 0        | 0.004717 |
| 0        | 0        | 5.00E-05 | 0        | 0        | 0        | 1.32E-04 | 0        | 0.007995 | 0.004926 | 8.40E-05 | 0        | 8.74E-04 | 0        | 0        |
| 0.00263  | 0.017901 | 0.001553 | 0.0842   | 3.57E-04 | 0.008044 | 0.033726 | 5.70E-05 | 3.40E-05 | 1.56E-04 | 0.054846 | 0.051795 | 0.003271 | 0.00371  | 0.001406 |
| 0        | 7.90E-04 | 0        | 0        | 0        | 0        | 0        | 0        | 0        | 0        | 0.045477 | 0        | 0        | 0        | 0        |
| 0        | 0        | 0        | 0        | 0.002112 | 0        | 0        | 0        | 3.16E-04 | 2.73E-04 | 0        | 0        | 0        | 0        | 0        |
| 0        | 0.004845 | 0        | 0        | 0        | 0.019058 | 0.041009 | 0        | 0        | 0        | 0.00112  | 0.008023 | 0.027512 | 0        | 0.002007 |
| 0        | 0        | 0        | 0        | 0        | 0.021519 | 0        | 0        | 0        | 0        | 0        | 1.49E-04 | 0        | 6.10E-05 | 0        |
| 6.53E-04 | 0.028988 | 0.005096 | 1.13E-04 | 0.017627 | 0.001677 | 2.51E-04 | 4.20E-05 | 2.90E-04 | 2.55E-04 | 2.95E-04 | 4.63E-04 | 6.75E-04 | 1.09E-04 | 8.78E-04 |
| 0        | 0.008895 | 0.023594 | 0        | 0.101183 | 6.51E-04 | 0.007735 | 0        | 2.26E-04 | 4.89E-04 | 0.004099 | 0.008465 | 0.023521 | 0        | 0.017129 |
| 0        | 0.017152 | 0        | 0        | 0        | 0.004316 | 0.012317 | 0        | 2.63E-04 | 2.76E-04 | 0.001522 | 0.024341 | 0.006712 | 0        | 0.017398 |
| 0.030335 | 8.90E-05 | 0.084926 | 0.002601 | 0.019617 | 0.258369 | 2.44E-04 | 0.332769 | 0.051693 | 0.051733 | 4.70E-05 | 0.003362 | 8.46E-04 | 0.005793 | 1.18E-04 |
| 2.50E-05 | 0.002689 | 8.00E-05 | 0.001443 | 3.30E-04 | 0.012722 | 0.015174 | 0        | 8.23E-04 | 0.001579 | 0.007448 | 0.002936 | 0.009073 | 0        | 0.058026 |
| 0        | 0.006207 | 0        | 0.001103 | 7.13E-04 | 0.022225 | 0.012985 | 0        | 0.010218 | 0.016101 | 0.009612 | 2.37E-04 | 0.154422 | 0        | 0.001744 |
| 3.70E-05 | 9.79E-04 | 0        | 0.005705 | 0        | 0        | 0.004323 | 2.10E-05 | 0        | 0        | 0.002418 | 6.10E-05 | 5.90E-05 | 0        | 0        |
| 7.30E-05 | 0.001519 | 0        | 4.60E-05 | 3.10E-05 | 0.005942 | 0.004664 | 0        | 1.19E-04 | 2.73E-04 | 2.83E-04 | 9.63E-04 | 0.021054 | 0        | 0.065108 |
| 0        | 0        | 0        | 0        | 0        | 0.002542 | 5.20E-04 | 0        | 0        | 2.00E-05 | 0        | 0        | 0        | 0        | 0        |
| 1.46E-04 | 0.033106 | 6.53E-04 | 0.010889 | 0        | 0.007236 | 0.012285 | 0        | 0        | 0        | 0.004432 | 0        | 0.006038 | 0        | 7.06E-04 |
| 2.80E-05 | 0.002636 | 0        | 3.70E-05 | 0.001208 | 0.015889 | 0.001959 | 0        | 0.014784 | 0.018683 | 7.40E-04 | 4.81E-04 | 6.53E-04 | 0        | 0.00144  |
| 0.022527 | 0.02084  | 0        | 0.001177 | 0        | 0.018966 | 0.015949 | 2.20E-05 | 0        | 0        | 0        | 2.21E-04 | 2.60E-05 | 0        | 0.006355 |
| 0        | 0.189238 | 0        | 0        | 0        | 0        | 0        | 0        | 0        | 0        | 0        | 0        | 0        | 0        | 0.001426 |
| 0        | 0.005305 | 0        | 0        | 0.001327 | 0.003362 | 0.012088 | 0        | 0        | 0        | 0        | 0        | 0        | 0        | 0.032743 |
| 0.003647 | 6.70E-05 | 3.53E-04 | 1.21E-04 | 3.14E-04 | 0        | 0        | 0        | 9.60E-05 | 1.97E-04 | 0.004015 | 0        | 0        | 0        | 0        |
| 4.20E-05 | 0.005406 | 0        | 4.00E-05 | 7.30E-05 | 0.010393 | 0.008321 | 2.70E-05 | 0.01145  | 0.009572 | 0.00187  | 0.038727 | 0.06182  | 0        | 0.061308 |
| 1.30E-05 | 8.98E-04 | 0        | 0.006463 | 0        | 0.024039 | 3.34E-04 | 0        | 0        | 0        | 8.28E-04 | 0.024415 | 6.59E-04 | 0        | 5.48E-04 |
| 8.80E-04 | 3.47E-04 | 1.27E-04 | 2.40E-04 | 0.002636 | 0.002142 | 7.20E-05 | 0.001945 | 5.90E-04 | 4.70E-04 | 2.70E-05 | 0        | 6.79E-04 | 0        | 2.60E-05 |
| 0        | 3.10E-04 | 3.70E-05 | 0        | 0        | 3.87E-04 | 0.077572 | 0        | 4.00E-05 | 0        | 1.18E-04 | 0        | 0.012282 | 0        | 0        |
| 1.21E-04 | 2.37E-04 | 1.76E-04 | 3.70E-05 | 9.26E-04 | 0        | 3.00E-05 | 6.90E-05 | 8.10E-05 | 2.09E-04 | 2.70E-05 | 1.06E-04 | 1.90E-05 | 0        | 0        |
| 0        | 2.58E-04 | 0        | 0        | 4.87E-04 | 0        | 5.70E-05 | 0        | 0        | 0        | 0        | 3.20E-05 | 0.0012   | 0        | 0        |
| 0        | 0.004337 | 0        | 0        | 0.009522 | 0.007683 | 0.010757 | 0        | 0        | 0        | 2.64E-04 | 0.074496 | 0.040855 | 0.007071 | 0.007514 |
| 4.50E-05 | 2.70E-05 | 0        | 0.003212 | 1.80E-04 | 0        | 0.003101 | 0        | 7.80E-05 | 7.40E-05 | 5.30E-05 | 0        | 0        | 0        | 0        |
| 0        | 0        | 0        | 0        | 0        | 0        | 0        | 0        | 8.90E-05 | 0        | 0        | 0        | 0        | 0        | 0        |
| 2.00E-05 | 3.09E-04 | 0        | 0.001185 | 0.001125 | 0.009511 | 0.002625 | 1.13E-04 | 0.002948 | 0.002436 | 0.0011   | 0.002635 | 0.003038 | 4.72E-04 | 4.71E-04 |
| 3.50E-05 | 0.086484 | 1.58E-04 | 0        | 1.63E-04 | 0        | 4.62E-04 | 0        | 2.80E-05 | 1.60E-05 | 3.80E-05 | 0        | 0        | 0        | 1.09E-04 |
| 0.001424 | 6.18E-04 | 3.76E-04 | 3.60E-05 | 3.75E-04 | 0.002777 | 1.15E-04 | 0.001021 | 0.032705 | 0.003035 | 3.70E-04 | 7.77E-04 | 0.00636  | 4.23E-04 | 6.72E-04 |
| 0        | 9.80E-05 | 0        | 0        | 0        | 0        | 3.10E-05 | 0        | 0        | 0        | 7.06E-04 | 0        | 2.20E-05 | 0        | 0        |
| 0.011677 | 5.80E-05 | 0        | 0        | 0        | 0        | 0        | 7.10E-05 | 1.28E-04 | 2.29E-04 | 0        | 0        | 9.40E-05 | 0        | 9.30E-05 |
| 0        | 6.06E-04 | 0.001666 | 4.10E-05 | 0        | 5.51E-04 | 2.05E-04 | 1.31E-04 | 2.90E-05 | 8.10E-05 | 1.92E-04 | 4.10E-05 | 0        | 4.30E-05 | 3.19E-04 |
| 5.30E-05 | 4.20E-04 | 0        | 3.79E-04 | 2.68E-04 | 3.61E-04 | 0.0035   | 0        | 0.002211 | 0.007727 | 5.20E-04 | 0.009206 | 4.11E-04 | 0        | 0.002163 |
| 0        | 0        | 0        | 0        | 0        | 0        | 0        | 0        | 0        | 0        | 0        | 0        | 0        | 0        | 0        |
| 8.14E-04 | 0.001265 | 0        | 0        | 0        | 0        | 0        | 2.20E-05 | 0        | 0        | 0        | 0        | 0        | 0        | 3.48E-04 |
| 2.20E-05 | 0.004097 | 0        | 2.65E-04 | 0        | 2.10E-04 | 0        | 0        | 5.50E-05 | 0        | 8.38E-04 | 1.40E-04 | 3.70E-05 | 0        | 1.90E-05 |
| 8.50E-05 | 4.40E-05 | 0        | 0.009399 | 0        | 0        | 0        | 0        | 0        | 0        | 6.36E-04 | 0        | 0        | 0        | 0        |
| 0        | 1.70E-05 | 0        | 0        | 9.09E-04 | 0.001703 | 0        | 0        | 0        | 0        | 0        | 5.60E-05 | 0        | 0        | 0        |
| 0        | 0        | 0        | 0        | 0.00103  | 0.002461 | 3.00E-05 | 0        | 0        | 0        | 0        | 0.008314 | 0        | 0        | 0        |
| 0.00213  | 0.001734 | 0        | 0        | 0        | 2.74E-04 | 0        | 0.001668 | 2.60E-05 | 0        | 3.30E-05 | 0        | 0        | 2.81E-04 | 0        |
| 4.80E-05 | 0.002338 | 0        | 0.002491 | 4.09E-04 | 8.78E-04 | 9.32E-04 | 0        | 4.15E-04 | 4.19E-04 | 1.90E-05 | 0        | 3.63E-04 | 3.60E-05 | 2.10E-05 |
| 0        | 0        | 6.10E-05 | 0        | 0        | 0        | 0        | 0        | 0        | 0        | 0        | 0        | 0        | 0        | 3.20E-05 |
| 0        | 6.20E-05 | 0        | 0        | 0        | 0        | 0        | 0        | 0        | 0        | 0.002764 | 0        | 0        | 0        | 0        |
| 0        | 0        | 0        | 0        | 0        | 0        | 0        | 0        | 0        | 0        | 0        | 0        | 0        | 0        | 0        |
| 0        | 0        | 0        | 0        | 0        | 0        | 0        | 0        | 3.20E-05 | 0        | 0        | 0        | 1.14E-04 | 0        | 0        |
| 0        | 0        | 0        | 1.94E-04 | 0        | 0        | 2.80E-05 | 0        | 0        | 0        | 2.90E-05 | 0        | 0        | 0        | 0        |

|          |          |          |          |          |          |          |          |          |          |          |          |          |          |          |
|----------|----------|----------|----------|----------|----------|----------|----------|----------|----------|----------|----------|----------|----------|----------|
| 1.32E-04 | 0        | 1.13E-04 | 0        | 5.61E-04 | 0        | 3.10E-05 | 0        | 6.40E-05 | 3.50E-05 | 3.00E-05 | 5.00E-05 | 1.01E-04 | 0        | 0        |
| 0        | 0        | 0        | 0        | 0        | 0        | 0        | 0        | 0        | 0        | 0        | 0        | 0        | 0        | 0        |
| 0        | 5.80E-05 | 0        | 0        | 0        | 0.003624 | 0.001353 | 0        | 0        | 0        | 3.55E-04 | 0        | 1.14E-04 | 0        | 2.30E-05 |
| 0        | 0        | 0        | 0.001505 | 0        | 0        | 0        | 0        | 0        | 0        | 0        | 0        | 0        | 0        | 0        |
| 0        | 0        | 0        | 0        | 0        | 0        | 0        | 0        | 0        | 0        | 0        | 0        | 0        | 0.012697 | 0        |
| 2.20E-05 | 0        | 0        | 3.90E-05 | 0        | 0        | 0        | 0        | 0        | 0        | 5.30E-05 | 0        | 0        | 0        | 6.20E-05 |
| 3.40E-05 | 2.20E-05 | 5.40E-05 | 0        | 3.50E-05 | 0        | 0        | 0        | 2.55E-04 | 1.13E-04 | 2.60E-05 | 2.30E-05 | 0        | 0        | 0        |
| 0        | 0        | 0        | 0        | 0        | 0        | 0        | 0        | 0        | 0        | 0        | 0        | 0        | 0        | 0        |
| 0        | 7.84E-04 | 9.90E-05 | 0        | 0        | 1.25E-04 | 9.60E-05 | 0        | 0        | 0        | 0        | 0        | 0        | 0        | 9.13E-04 |
| 0        | 0        | 0        | 0        | 0        | 0        | 0        | 0        | 0        | 0        | 0        | 0        | 0        | 0        | 0        |
| 0.001045 | 9.34E-04 | 1.74E-04 | 3.60E-05 | 5.48E-04 | 0.005996 | 2.27E-04 | 0        | 8.93E-04 | 9.22E-04 | 3.30E-05 | 8.70E-05 | 4.52E-04 | 0        | 2.20E-04 |
| 0        | 0        | 0        | 0        | 0        | 0        | 0        | 0        | 0        | 0        | 0        | 0        | 0        | 0        | 0        |
| 1.89E-04 | 7.70E-05 | 0        | 0        | 0.00215  | 2.83E-04 | 6.40E-05 | 0        | 2.33E-04 | 9.90E-05 | 0        | 5.00E-05 | 1.56E-04 | 0        | 0        |
| 0        | 0        | 2.30E-05 | 0        | 8.60E-05 | 6.80E-05 | 0        | 0        | 0        | 0        | 0        | 0        | 3.60E-05 | 0        | 0        |
| 4.55E-04 | 6.10E-05 | 1.09E-04 | 0        | 4.50E-05 | 2.59E-04 | 0        | 3.17E-04 | 0.001744 | 1.40E-04 | 1.90E-05 | 2.30E-05 | 7.84E-04 | 2.20E-05 | 0        |
| 8.92E-04 | 1.47E-04 | 4.00E-04 | 0        | 3.46E-04 | 6.43E-04 | 0        | 0        | 3.80E-04 | 4.00E-04 | 0        | 1.71E-04 | 4.90E-05 | 2.70E-05 | 0        |
| 0        | 0        | 0        | 0        | 0        | 0        | 0        | 0        | 0        | 0        | 0        | 0        | 0        | 0        | 0        |
| 0        | 0        | 0        | 0        | 3.00E-05 | 0        | 0        | 0        | 0        | 0        | 2.65E-04 | 0        | 7.88E-04 | 0        | 0        |
| 0        | 0        | 0        | 0        | 0        | 0        | 0        | 0        | 0        | 0        | 0        | 0        | 0        | 0        | 0        |
| 0.00487  | 0.008634 | 0.004721 | 0.007522 | 0.011041 | 0.002342 | 0.001763 | 2.39E-04 | 0.005662 | 0.004614 | 0.001639 | 0.005687 | 0.008696 | 2.26E-04 | 0.005608 |

| SP05     | SP25     | SP20     | HC70     | HC26     | HC37     | HC31     | HC07     | HC01     | HC16     | HC20     | HC21     | HC51     | HC39     | HC30     |
|----------|----------|----------|----------|----------|----------|----------|----------|----------|----------|----------|----------|----------|----------|----------|
| 1.69E-04 | 1.38E-04 | 1.70E-05 | 0.739573 | 0.719395 | 0.709832 | 0.618874 | 0.617744 | 0.578739 | 0.575614 | 0.567877 | 0.561769 | 0.527218 | 0.490697 | 0.477689 |
| 0.889834 | 0.831403 | 8.00E-05 | 2.17E-04 | 0        | 0.002079 | 0.005587 | 0.006944 | 0.005942 | 0.010056 | 0.002987 | 0.002674 | 0.02939  | 0.018486 | 0.010987 |
| 0        | 0.083038 | 1.10E-05 | 0.033924 | 0.056971 | 0.103184 | 0.027266 | 0.081196 | 0.149818 | 0.0561   | 0.018464 | 0.045284 | 0.147218 | 0.102225 | 0.127258 |
| 0        | 0.012807 | 0.891222 | 0.033133 | 0.057799 | 0.041495 | 0.06468  | 0.056476 | 0.065434 | 0.069238 | 0.044729 | 0.077917 | 0.036197 | 0.052232 | 0.035947 |
| 2.80E-05 | 0.019656 | 1.99E-04 | 0.019789 | 0.033596 | 0.009412 | 0.083123 | 0.03684  | 0.028482 | 0.074912 | 0.016752 | 0.056754 | 0.026159 | 0.042828 | 0.015189 |
| 0        | 2.39E-04 | 2.80E-05 | 0.007346 | 0.00957  | 0.001867 | 6.06E-04 | 0.002233 | 6.81E-04 | 2.48E-04 | 6.90E-05 | 4.84E-04 | 0.001247 | 3.50E-05 | 1.53E-04 |
| 1.87E-04 | 0.01985  | 3.70E-05 | 0        | 8.30E-05 | 1.01E-04 | 1.67E-04 | 1.99E-04 | 0        | 0        | 0.079033 | 4.40E-05 | 2.00E-04 | 1.10E-04 | 3.50E-05 |
| 0.001294 | 3.69E-04 | 4.50E-05 | 0.002406 | 7.30E-05 | 0.004613 | 0.009875 | 0.004621 | 0.006078 | 0.005091 | 0.001197 | 0.009008 | 0.031544 | 0.011309 | 0.046693 |
| 0        | 1.80E-05 | 0        | 0        | 0        | 6.55E-04 | 0        | 0        | 0        | 0        | 0.001704 | 0        | 0        | 3.10E-05 | 0.001898 |
| 0        | 0        | 0        | 0        | 8.10E-04 | 0        | 0        | 0        | 0        | 0        | 0        | 0        | 0        | 0        | 0        |
| 0        | 0        | 0        | 0        | 0.007703 | 0.017554 | 0.015011 | 0.040179 | 0.014925 | 0.020165 | 0.013986 | 0.019018 | 0.055806 | 0.08712  | 0.010897 |
| 0        | 0.013171 | 0        | 1.26E-04 | 3.80E-05 | 0        | 0        | 9.80E-05 | 1.15E-04 | 0        | 0.020404 | 3.90E-05 | 0.001998 | 0        | 0.007972 |
| 4.80E-05 | 2.16E-04 | 0.012142 | 2.93E-04 | 3.60E-05 | 3.60E-04 | 1.83E-04 | 4.50E-05 | 7.70E-04 | 8.82E-04 | 6.30E-05 | 4.37E-04 | 4.60E-05 | 8.00E-05 | 2.82E-04 |
| 0        | 0        | 0        | 3.90E-05 | 0.005376 | 0        | 0.001717 | 0.007579 | 7.14E-04 | 0.009572 | 0.003997 | 0.047324 | 0.003207 | 0.006615 | 0.002669 |
| 0        | 1.31E-04 | 1.40E-05 | 0.007023 | 0.009909 | 8.53E-04 | 0.017811 | 0.033297 | 0.018379 | 0.023543 | 0.010185 | 0.01432  | 0.015631 | 0.0131   | 0.012414 |
| 0.072317 | 1.01E-04 | 0.010714 | 3.88E-04 | 6.12E-04 | 8.50E-04 | 4.82E-04 | 8.10E-05 | 8.60E-05 | 0        | 0        | 0        | 0        | 3.10E-05 | 3.00E-05 |
| 0        | 2.41E-04 | 9.72E-04 | 0.002248 | 0.001707 | 0.005403 | 0.012535 | 0.014059 | 0.012665 | 0.02392  | 0.0111   | 0.018052 | 0.020402 | 0.025343 | 0.003117 |
| 7.60E-05 | 9.25E-04 | 0        | 2.68E-04 | 0.00476  | 0.024327 | 0.015511 | 5.45E-04 | 0.002172 | 0.007911 | 1.72E-04 | 0.003623 | 0.007745 | 0.01142  | 0.007563 |
| 0        | 0        | 0        | 0.02338  | 0        | 0.006017 | 0.016549 | 6.38E-04 | 0        | 0.004428 | 0.042715 | 0.005342 | 0.00167  | 0.007839 | 0.053494 |
| 3.10E-05 | 0        | 0        | 0.005107 | 0        | 1.88E-04 | 0.020598 | 0.00435  | 0.006567 | 0.013769 | 0.001286 | 0.011439 | 0.004909 | 0.006317 | 0.002361 |
| 0        | 0        | 0        | 3.70E-05 | 1.14E-04 | 0        | 0.002522 | 0.014016 | 0.04028  | 0.003474 | 0.034505 | 0.029995 | 0.008069 | 0.023782 | 0.001022 |
| 0        | 4.90E-05 | 0        | 3.45E-04 | 0        | 2.10E-05 | 0.008765 | 0.005153 | 0        | 0.012209 | 2.84E-04 | 0.013574 | 0.018828 | 0.023324 | 0.027862 |
| 0        | 0.002646 | 3.00E-05 | 0.005662 | 8.00E-05 | 0.015543 | 0.005699 | 0.006475 | 0.009334 | 0.011243 | 0.004677 | 0.009211 | 0.007752 | 0.01687  | 0.002434 |
| 0        | 3.90E-05 | 0.003594 | 1.54E-04 | 0.00162  | 5.28E-04 | 1.72E-04 | 0.002494 | 7.02E-04 | 1.40E-04 | 3.87E-04 | 0.002939 | 0.005421 | 0.001621 | 0.00129  |
| 0        | 0        | 0        | 0        | 9.09E-04 | 0        | 1.10E-04 | 0        | 9.89E-04 | 0        | 0.069884 | 2.28E-04 | 0.00242  | 0        | 0.003787 |
| 0        | 0        | 0.045794 | 0        | 0.00117  | 1.17E-04 | 5.80E-05 | 6.75E-04 | 2.00E-04 | 2.23E-04 | 0        | 0.00148  | 6.93E-04 | 2.40E-05 | 3.10E-05 |
| 5.00E-05 | 7.10E-05 | 0        | 0.017071 | 0        | 0.015141 | 0.024861 | 0.011324 | 0        | 9.39E-04 | 4.70E-05 | 0.010332 | 0        | 0        | 0        |
| 0        | 0        | 1.20E-05 | 1.09E-04 | 0        | 0.001185 | 8.48E-04 | 0.005008 | 0.002194 | 0.006259 | 0.002972 | 0.002605 | 0.002239 | 0.001662 | 0.001285 |
| 0        | 2.60E-05 | 0        | 0.004387 | 0        | 0.004369 | 5.50E-05 | 0.001637 | 0        | 0.002373 | 1.59E-04 | 0.002336 | 0.001705 | 6.99E-04 | 7.96E-04 |
| 0        | 3.47E-04 | 0.001783 | 1.13E-04 | 0        | 0        | 0        | 0        | 2.50E-05 | 4.30E-05 | 0        | 7.50E-05 | 0        | 0        | 0        |
| 0        | 0        | 0        | 0        | 0        | 6.30E-05 | 0        | 3.60E-05 | 0.006066 | 0.009369 | 0        | 0.001714 | 4.90E-05 | 0.004246 | 0.014671 |
| 0        | 5.00E-05 | 0.001393 | 1.13E-04 | 0        | 0        | 0        | 0        | 0        | 0        | 0        | 4.10E-05 | 0        | 0        | 0        |
| 0        | 0        | 0        | 0.016949 | 0        | 0.00658  | 0.013148 | 0.004672 | 0.011688 | 0.003796 | 0.010064 | 0.010995 | 6.05E-04 | 0.00629  | 0.009097 |
| 0        | 5.40E-05 | 0        | 3.00E-05 | 9.40E-05 | 9.70E-05 | 1.66E-04 | 0.001547 | 0.006575 | 0.004689 | 3.26E-04 | 0.001365 | 5.08E-04 | 0.001554 | 9.39E-04 |
| 0        | 0        | 0        | 3.84E-04 | 0.025995 | 0.005444 | 0.01202  | 0.004239 | 0.007159 | 0.001274 | 0.012055 | 3.60E-04 | 0.00477  | 0.009969 | 0.007717 |
| 0        | 0        | 0        | 0        | 0        | 0        | 0        | 0        | 0        | 0        | 0        | 0        | 0        | 0        | 0.034341 |
| 5.20E-05 | 0.00173  | 0        | 0.002562 | 1.92E-04 | 0.00536  | 0.002848 | 0.004893 | 0.002529 | 0.00253  | 0.00164  | 0.003671 | 0.006378 | 0.003448 | 0.011721 |
| 0        | 2.20E-05 | 0.019775 | 3.17E-04 | 0.008816 | 2.06E-04 | 0        | 4.00E-05 | 0.001091 | 0        | 1.83E-04 | 1.22E-04 | 0        | 0        | 4.80E-05 |
| 7.30E-04 | 0.002692 | 5.60E-04 | 0        | 0        | 0        | 0        | 0        | 0        | 0        | 0        | 0        | 0        | 0        | 0        |
| 0        | 0        | 0        | 0        | 0        | 0        | 5.20E-05 | 0        | 0        | 0        | 0        | 5.74E-04 | 0.014326 | 6.40E-05 | 0.001293 |
| 0        | 0        | 0        | 0.003377 | 0        | 0        | 0        | 3.95E-04 | 6.90E-05 | 2.12E-04 | 0        | 0        | 2.62E-04 | 7.70E-05 | 0        |
| 4.80E-05 | 7.10E-05 | 0        | 0.002071 | 0.002695 | 0.004835 | 0.002788 | 0.002423 | 0.003162 | 0.004456 | 0.004241 | 0.008842 | 0.002199 | 0.002903 | 0.001394 |
| 0        | 0.001596 | 1.70E-05 | 3.93E-04 | 1.09E-04 | 5.90E-04 | 3.78E-04 | 0.001131 | 0.001015 | 0.001855 | 4.77E-04 | 0.001902 | 0.002344 | 0.001264 | 0.00158  |
| 0        | 0        | 0        | 0        | 0        | 0        | 0        | 0        | 0        | 0        | 0        | 0        | 0        | 0        | 0        |
| 0        | 0        | 0        | 0.030306 | 0        | 1.14E-04 | 0        | 0.013619 | 0        | 0.022028 | 0        | 0.012863 | 0        | 3.26E-04 | 0.011444 |
| 0        | 0        | 0        | 0        | 0        | 6.00E-05 | 2.80E-04 | 3.60E-05 | 0        | 0        | 0        | 0        | 1.94E-04 | 2.68E-04 | 0.002354 |
| 0        | 2.10E-05 | 0        | 0        | 0        | 1.80E-05 | 0        | 0        | 0        | 2.56E-04 | 0        | 0        | 0        | 0.004411 | 0        |
| 0        | 0        | 0        | 3.20E-05 | 0        | 0        | 0        | 0        | 0        | 0        | 0        | 9.79E-04 | 4.80E-05 | 0.009174 | 0        |
| 0        | 0        | 0        | 0.002355 | 0.005707 | 0.003975 | 3.53E-04 | 0.004819 | 0        | 0.007568 | 5.69E-04 | 0.003151 | 0.001227 | 0.002151 | 1.78E-04 |
| 0        | 0        | 0        | 0.028295 | 3.90E-05 | 2.50E-05 | 5.48E-04 | 0        | 0.003129 | 1.29E-04 | 0.010272 | 0        | 0        | 0        | 0        |
| 0        | 2.20E-05 | 0        | 0.001122 | 1.90E-04 | 9.61E-04 | 0.001763 | 1.68E-04 | 0.003601 | 5.16E-04 | 9.71E-04 | 4.50E-05 | 1.51E-04 | 4.06E-04 | 0.001353 |
| 0        | 0        | 0        | 0        | 2.49E-04 | 0        | 0        | 0        | 7.10E-05 | 0        | 0        | 0        | 5.20E-05 | 0        | 0        |
| 0        | 0        | 0        | 0        | 0        | 7.00E-06 | 0        | 0        | 0        | 0        | 7.57E-04 | 0        | 0        | 0        | 0.001217 |
| 0        | 0        | 0        | 0        | 0.033849 | 0        | 0        | 0        | 0        | 0        | 0        | 0        | 0        | 0        | 0        |
| 0        | 0        | 0        | 0        | 0        | 0        | 0        | 0        | 0        | 0        | 0        | 0        | 0        | 0        | 0        |
| 0        | 0        | 0        | 9.15E-04 | 0        | 2.00E-04 | 0.001111 | 0        | 1.92E-04 | 2.15E-04 | 0.003085 | 0.002368 | 0        | 0.001579 | 0.006524 |

|          |          |          |          |          |          |          |          |          |          |          |          |          |          |          |          |
|----------|----------|----------|----------|----------|----------|----------|----------|----------|----------|----------|----------|----------|----------|----------|----------|
|          | 0        | 0        | 0        | 0        | 0        | 0        | 0        | 0        | 0        | 0        | 0        | 0        | 0        | 0        | 0        |
|          | 0        | 0        | 0        | 0        | 0        | 0        | 0        | 5.30E-05 | 0        | 0        | 0        | 0        | 0        | 0        | 0        |
|          | 0        | 0        | 0        | 0        | 0        | 1.07E-04 | 4.53E-04 | 4.10E-05 | 0.002414 | 0        | 2.32E-04 | 8.72E-04 | 2.05E-04 | 2.43E-04 | 0.005231 |
|          | 0        | 0        | 0        | 0        | 0        | 0        | 5.20E-05 | 0        | 0        | 0        | 0        | 8.90E-05 | 0        | 0        | 0        |
| 0.034315 | 0        | 0        | 0        | 0        | 0        | 6.20E-05 | 1.10E-04 | 0        | 0        | 0        | 0        | 0        | 0        | 0        | 0        |
|          | 0        | 0        | 0        | 0        | 0        | 0.001002 | 3.68E-04 | 0        | 0        | 1.82E-04 | 0.003454 | 0        | 0        | 0.001316 | 0.018551 |
|          | 0        | 1.52E-04 | 5.20E-04 | 0        | 0        | 2.40E-05 | 0        | 0        | 0        | 0        | 0        | 0        | 0        | 0        | 0        |
|          | 0        | 0        | 0        | 0        | 0        | 0        | 0        | 0        | 0        | 0        | 0        | 0        | 0        | 0        | 0        |
|          | 0        | 0        | 0        | 7.50E-05 | 0        | 3.82E-04 | 0        | 0        | 0.002308 | 0        | 0        | 3.10E-05 | 5.10E-05 | 2.60E-05 | 3.20E-05 |
|          | 0        | 0        | 0        | 6.90E-05 | 1.04E-04 | 2.20E-04 | 5.90E-05 | 3.40E-05 | 0.001504 | 0        | 0        | 0        | 0        | 0        | 0        |
| 2.20E-05 | 0.001163 | 0        | 0        | 0        | 0        | 0        | 0        | 0        | 3.60E-05 | 0        | 0        | 0        | 0        | 0        | 0        |
|          | 0        | 0        | 0        | 0        | 0        | 0        | 0        | 0        | 0        | 0        | 0        | 0        | 0        | 0        | 0        |
|          | 0        | 0        | 0.00137  | 0        | 0        | 0        | 0        | 0        | 0        | 0        | 0        | 0        | 0        | 0        | 0        |
|          | 0        | 0        | 0        | 0        | 0        | 0        | 0        | 0        | 0        | 0        | 0        | 0        | 0        | 0        | 0        |
| 1.36E-04 | 4.70E-04 | 1.13E-04 | 0        | 0        | 0        | 0        | 0        | 0        | 0        | 0        | 0        | 0        | 0        | 0        | 0        |
|          | 0        | 5.60E-05 | 0        | 0        | 0        | 0        | 5.60E-05 | 0        | 0        | 0        | 0        | 0        | 0        | 0        | 0        |
|          | 0        | 0        | 0        | 0        | 0        | 0        | 0        | 0        | 0        | 5.00E-04 | 0        | 4.61E-04 | 0        | 7.88E-04 | 0        |
|          | 0        | 1.17E-04 | 0        | 0        | 0        | 0        | 0        | 0        | 0        | 0        | 0        | 0        | 0        | 0        | 7.30E-05 |
|          | 0        | 0        | 0        | 0        | 0        | 0        | 0        | 0        | 0        | 0        | 0        | 0        | 0        | 0        | 0        |
| 6.63E-04 | 0.006303 | 0.009558 | 0.007497 | 0.00963  | 0.003974 | 0.009782 | 0.007948 | 0.0021   | 0.008073 | 0.002039 | 0.003252 | 0.008917 | 0.005697 | 0.015087 |          |

| HC56     | HC17     | HC55     | HC49     | HC29     | HC57     | HC69     | HC14     | HC34     | HC71     | HC03     | HC04     | HC64     | HC33     | HC63     |
|----------|----------|----------|----------|----------|----------|----------|----------|----------|----------|----------|----------|----------|----------|----------|
| 0.469666 | 0.430462 | 0.424966 | 0.377877 | 0.368488 | 0.36845  | 0.361255 | 0.353842 | 0.341713 | 0.339626 | 0.338933 | 0.335924 | 0.329947 | 0.318218 | 0.317541 |
| 0.009987 | 1.47E-04 | 3.90E-05 | 0.016055 | 0.031337 | 0.018143 | 0.01299  | 0.001537 | 0.00105  | 0.025066 | 0.007655 | 0        | 0.002694 | 0.009323 | 2.29E-04 |
| 0.10785  | 0.090516 | 0.158365 | 0.159242 | 0.105522 | 0.140426 | 0.021485 | 0.198623 | 0.342763 | 0.111292 | 0.168146 | 0.002058 | 0.079674 | 2.10E-05 | 0.172363 |
| 0.018236 | 0.115065 | 0.064486 | 0.046021 | 0.155199 | 0.07359  | 0.18418  | 0.318595 | 0.078542 | 0.068251 | 0.107267 | 0.197534 | 0.019706 | 0.031556 | 0.10544  |
| 0.092437 | 0.093139 | 0.124882 | 0.05198  | 0.045865 | 0.023499 | 0.064928 | 0.018026 | 0.098458 | 0.07042  | 0.040621 | 0.111611 | 0.0244   | 0.284157 | 0.066826 |
| 0        | 0        | 8.14E-04 | 4.99E-04 | 9.62E-04 | 0.00232  | 7.76E-04 | 0.002148 | 0        | 1.44E-04 | 1.12E-04 | 0.249672 | 2.03E-04 | 0.106012 | 7.58E-04 |
| 0.090718 | 0        | 0        | 1.24E-04 | 0        | 0        | 3.30E-05 | 2.80E-05 | 1.37E-04 | 4.86E-04 | 2.26E-04 | 5.50E-05 | 4.57E-04 | 0        | 3.06E-04 |
| 0.015398 | 0.02551  | 0.001498 | 0.014618 | 0.002082 | 3.30E-05 | 0.016014 | 0.001307 | 0.003444 | 0.096897 | 0.014804 | 1.45E-04 | 0.001591 | 0.001271 | 0.021427 |
| 0.001832 | 0        | 0        | 0        | 0        | 0        | 0        | 0        | 0        | 0        | 0        | 0        | 0        | 2.20E-05 | 0        |
| 0        | 0        | 0        | 0        | 0        | 0        | 4.60E-05 | 0        | 0        | 0        | 0        | 1.43E-04 | 0        | 4.33E-04 | 6.20E-05 |
| 0.014187 | 0.043442 | 0.082114 | 0.067512 | 0.015905 | 0        | 0.034772 | 0.00146  | 0        | 0.03517  | 0.045723 | 6.40E-05 | 0.024469 | 2.20E-05 | 0.02005  |
| 0        | 0        | 2.60E-05 | 0.094197 | 0.120016 | 0.242144 | 0.143654 | 0        | 0        | 2.16E-04 | 5.40E-05 | 2.80E-05 | 0.215589 | 2.10E-05 | 0        |
| 3.20E-05 | 0.001976 | 4.76E-04 | 4.50E-04 | 0.00747  | 4.28E-04 | 2.31E-04 | 7.89E-04 | 3.60E-05 | 0.001234 | 1.93E-04 | 0.00112  | 4.89E-04 | 5.86E-04 | 1.55E-04 |
| 6.56E-04 | 0.006129 | 6.90E-04 | 0.002505 | 0.006874 | 0        | 0.001148 | 4.45E-04 | 0.003352 | 4.71E-04 | 0.03294  | 1.60E-05 | 0.012766 | 0.127128 | 0.003798 |
| 0.003118 | 0.00771  | 0.030734 | 0.023379 | 0.056151 | 0        | 0.031612 | 0.012358 | 0        | 0.013117 | 0.03622  | 1.99E-04 | 0.036997 | 2.50E-05 | 0.029596 |
| 0.001966 | 1.79E-04 | 1.00E-04 | 5.50E-05 | 1.38E-04 | 0.001554 | 5.50E-05 | 5.04E-04 | 7.16E-04 | 0        | 2.87E-04 | 0.002222 | 5.70E-05 | 2.81E-04 | 9.30E-05 |
| 0.010317 | 0.025501 | 0.01764  | 0.016346 | 0.00975  | 0.006125 | 0.015062 | 0.010629 | 0.015199 | 0.029433 | 0.026127 | 7.19E-04 | 0.01095  | 0.010972 | 0.041059 |
| 0.018665 | 0.018448 | 0.017466 | 0.047119 | 0.001043 | 0.001748 | 0.007544 | 0.019784 | 0.001028 | 0.011659 | 0.004002 | 3.90E-05 | 0.010953 | 0        | 0.04575  |
| 0.017526 | 0.002657 | 0        | 0.001564 | 9.01E-04 | 0        | 0.011075 | 0        | 0.004501 | 0.063904 | 0.015021 | 1.90E-05 | 0.002251 | 0        | 0.009469 |
| 7.43E-04 | 0.014723 | 0.022223 | 0.002029 | 0.02166  | 6.90E-05 | 0.0012   | 0.005219 | 0.019316 | 0.002912 | 0.014538 | 0        | 0.004256 | 0        | 0.006182 |
| 0.005695 | 0.009392 | 2.40E-05 | 0.004988 | 0.011317 | 0.008824 | 0.003577 | 0.008859 | 0.001151 | 0.009568 | 0.046866 | 3.34E-04 | 0.10874  | 0        | 0.01822  |
| 0.007143 | 0.004534 | 0        | 0.007519 | 0        | 0.011881 | 0.01984  | 0        | 0        | 0.021245 | 0.019016 | 2.30E-05 | 0.005529 | 0        | 0.057432 |
| 0.002992 | 0.018429 | 0.010417 | 0.006552 | 0.00144  | 0.020387 | 0.010735 | 0.008423 | 0.009845 | 0.011132 | 0.005748 | 0.002945 | 0.003046 | 0        | 0.016388 |
| 0        | 0.001203 | 3.22E-04 | 0.003122 | 0.003658 | 0.002142 | 3.80E-04 | 0.012864 | 0.001569 | 0.001753 | 0.016392 | 0.009337 | 0.019957 | 0        | 0.003256 |
| 0        | 0.002693 | 0        | 0        | 0        | 0        | 0        | 0        | 3.00E-05 | 0        | 0.001624 | 0.001621 | 0.006359 | 0.035997 | 3.40E-05 |
| 0        | 3.10E-05 | 3.70E-04 | 0.003548 | 1.12E-04 | 8.56E-04 | 0        | 3.83E-04 | 1.59E-04 | 0.004202 | 0.003332 | 0.00237  | 0.014114 | 0        | 3.41E-04 |
| 0.005107 | 0.021603 | 0        | 0.006597 | 0        | 0.023259 | 0.002145 | 0        | 0.023039 | 0.016215 | 0        | 0.053701 | 0.00232  | 1.70E-05 | 0        |
| 0.00211  | 0.003921 | 0.001964 | 0.002679 | 0.005681 | 1.13E-04 | 0.002371 | 1.20E-04 | 0.00164  | 0.003468 | 0.005458 | 3.27E-04 | 0.0022   | 3.60E-05 | 0.00798  |
| 0.013927 | 0.001383 | 0.001913 | 0.007234 | 0.001194 | 0.001062 | 2.90E-04 | 6.02E-04 | 0.002177 | 0.005165 | 9.58E-04 | 6.10E-04 | 0.001533 | 1.90E-05 | 0.001632 |
| 0        | 0        | 0        | 6.70E-05 | 2.30E-05 | 1.12E-04 | 4.00E-05 | 0        | 0        | 0        | 6.70E-05 | 6.95E-04 | 1.96E-04 | 1.44E-04 | 0        |
| 0.008149 | 1.40E-05 | 4.08E-04 | 0        | 0        | 0        | 0.006095 | 0        | 0        | 0        | 0.006641 | 1.01E-04 | 0.001509 | 1.20E-04 | 0.024656 |
| 0        | 0        | 0        | 0        | 0        | 0        | 0        | 0        | 3.10E-05 | 0        | 0        | 2.77E-04 | 4.20E-05 | 2.17E-04 | 0        |
| 0.009393 | 0.002908 | 0.003618 | 0.001934 | 8.11E-04 | 0.004889 | 0.008725 | 0.002982 | 0.014932 | 0.010345 | 0        | 0.005785 | 0.001182 | 0.014383 | 0        |
| 8.85E-04 | 0.004322 | 0.008767 | 4.47E-04 | 0.005459 | 0        | 0.002571 | 0        | 0.002567 | 0.001284 | 0.003088 | 0        | 1.38E-04 | 0        | 0.01143  |
| 6.31E-04 | 0.016184 | 0.013412 | 0.004386 | 0.001618 | 0.005257 | 0.003621 | 0        | 0.010028 | 0.019346 | 0.012004 | 0        | 4.50E-05 | 0.033357 | 0        |
| 0        | 2.70E-05 | 0        | 0        | 0        | 0        | 0.002603 | 0        | 0        | 0        | 6.10E-05 | 0        | 0.024037 | 0        | 0        |
| 0.004385 | 0.007194 | 0.00365  | 0.002939 | 1.43E-04 | 3.10E-04 | 0.001523 | 4.66E-04 | 0.002237 | 0.003756 | 0.001783 | 4.75E-04 | 9.77E-04 | 0.001839 | 0.002821 |
| 0        | 8.50E-05 | 2.70E-05 | 0.002859 | 1.75E-04 | 0.00144  | 1.01E-04 | 8.30E-05 | 0        | 2.35E-04 | 6.03E-04 | 4.60E-05 | 0.004116 | 6.61E-04 | 3.24E-04 |
| 0        | 0        | 0        | 0        | 0        | 0        | 0        | 0        | 0        | 0        | 0        | 0        | 0        | 0        | 0        |
| 2.84E-04 | 0        | 0        | 0        | 0        | 0        | 2.45E-04 | 0        | 0        | 7.25E-04 | 0        | 2.20E-05 | 0        | 0        | 2.64E-04 |
| 0        | 0        | 2.90E-05 | 0        | 5.98E-04 | 0        | 2.99E-04 | 0        | 0        | 1.40E-04 | 0        | 1.60E-05 | 2.38E-04 | 1.40E-05 | 6.50E-05 |
| 0.002279 | 0.002084 | 0.006393 | 0.008985 | 0.006919 | 0.002535 | 0.004106 | 9.42E-04 | 0.006706 | 0.003729 | 0.002976 | 0.003263 | 0.006981 | 0.011844 | 8.66E-04 |
| 8.79E-04 | 0.001404 | 7.07E-04 | 0.004822 | 0.002854 | 0.003644 | 0.002628 | 0.003279 | 4.56E-04 | 0.003161 | 0.002627 | 3.17E-04 | 0.004196 | 9.20E-05 | 0.004381 |
| 0        | 0        | 0        | 0        | 0        | 0        | 0        | 0        | 0        | 0        | 0        | 0        | 0        | 0        | 0        |
| 0.003553 | 0        | 0        | 0        | 0        | 0        | 0        | 6.29E-04 | 0        | 9.41E-04 | 0        | 0        | 0.001328 | 0        | 0        |
| 7.52E-04 | 8.08E-04 | 0        | 0        | 0        | 0        | 2.61E-04 | 0        | 3.49E-04 | 6.62E-04 | 5.30E-05 | 0        | 0        | 0        | 1.00E-04 |
| 9.80E-05 | 0        | 0        | 0        | 0        | 0        | 9.63E-04 | 0        | 0        | 2.21E-04 | 0        | 0        | 0        | 0        | 0        |
| 0.010999 | 0        | 0        | 0        | 0        | 0.027812 | 0        | 0.013695 | 0        | 0        | 0        | 0        | 0        | 0        | 0        |
| 6.40E-05 | 0.008846 | 0        | 0.003361 | 3.90E-05 | 0        | 9.81E-04 | 0        | 6.60E-05 | 1.87E-04 | 4.44E-04 | 0.009776 | 0.003022 | 0        | 0.001947 |
| 0.001006 | 1.70E-04 | 0        | 0        | 0        | 3.50E-05 | 0        | 4.10E-05 | 0.006443 | 0        | 0        | 9.10E-05 | 0        | 0        | 0        |
| 4.71E-04 | 0.003948 | 2.10E-04 | 2.70E-05 | 0.001373 | 0        | 2.71E-04 | 1.40E-04 | 0.001579 | 5.17E-04 | 0.00473  | 1.16E-04 | 2.52E-04 | 7.34E-04 | 8.04E-04 |
| 0        | 2.10E-05 | 0        | 5.80E-05 | 0        | 0        | 0        | 0        | 0        | 0        | 0        | 2.05E-04 | 0        | 0.002152 | 0        |
| 0.006533 | 0        | 0        | 0        | 0        | 0        | 7.87E-04 | 0        | 0        | 4.32E-04 | 0        | 0        | 0        | 0        | 1.41E-04 |
| 0        | 0        | 0        | 0        | 0        | 0        | 0        | 0        | 0        | 0        | 0.009677 | 0        | 2.75E-04 | 0        | 0        |
| 0.007508 | 0        | 0        | 0        | 0        | 0        | 0        | 0        | 0        | 0        | 0        | 0        | 0        | 0        | 0        |
| 0.017767 | 0        | 3.40E-05 | 5.14E-04 | 0        | 0.001165 | 0.001993 | 1.30E-04 | 3.87E-04 | 0.002225 | 1.64E-04 | 0        | 1.05E-04 | 0        | 3.33E-04 |

|          |          |          |          |          |          |          |          |          |          |          |          |          |          |          |   |
|----------|----------|----------|----------|----------|----------|----------|----------|----------|----------|----------|----------|----------|----------|----------|---|
|          | 0        | 0        | 0        | 0        | 0        | 0        | 0        | 0        | 0        | 0        | 0        | 6.10E-05 | 0        | 0        | 0 |
|          | 0        | 0        | 0        | 0        | 0        | 0        | 0        | 0        | 0        | 0        | 0        | 0        | 0        | 0        | 0 |
| 0.001817 | 8.86E-04 | 0        | 4.60E-04 | 0        | 0        | 7.20E-05 | 4.50E-05 | 0        | 0.002276 | 0        | 0        | 0        | 1.60E-05 | 0        | 0 |
|          | 0        | 2.10E-05 | 0        | 0        | 3.20E-05 | 0        | 0        | 7.50E-05 | 6.40E-05 | 0        | 0        | 0        | 0        | 0        | 0 |
|          | 0        | 0        | 0        | 0        | 0        | 0        | 0        | 0        | 0        | 0        | 0        | 0        | 0        | 0        | 0 |
| 5.27E-04 | 0        | 0        | 0        | 0        | 0        | 5.24E-04 | 0        | 2.06E-04 | 5.95E-04 | 0        | 0        | 0        | 1.60E-05 | 0.002182 | 0 |
|          | 0        | 0        | 0        | 5.70E-05 | 0        | 0        | 0        | 0        | 0        | 0        | 0        | 4.30E-05 | 4.50E-05 | 0        | 0 |
|          | 0        | 0        | 0        | 0        | 3.50E-05 | 0        | 0.002239 | 0        | 0        | 0        | 0        | 0        | 0        | 0        | 0 |
| 3.70E-05 | 4.60E-05 | 0        | 2.56E-04 | 1.79E-04 | 4.00E-05 | 0        | 2.91E-04 | 5.80E-05 | 1.38E-04 | 6.10E-05 | 0        | 9.22E-04 | 0        | 6.80E-05 | 0 |
|          | 0        | 6.60E-05 | 0        | 0        | 0        | 0        | 0        | 0        | 0        | 1.11E-04 | 9.70E-05 | 0        | 0.001017 | 3.10E-05 | 0 |
| 3.20E-05 | 0        | 0        | 0        | 0        | 3.70E-05 | 0        | 0        | 0        | 4.60E-05 | 1.15E-04 | 6.27E-04 | 0        | 0        | 0        | 0 |
|          | 0        | 0        | 0        | 0        | 0        | 0        | 0        | 0        | 0        | 0        | 0        | 0        | 0        | 0        | 0 |
|          | 0        | 0        | 0        | 0        | 0        | 0        | 0        | 0        | 0        | 0        | 1.27E-04 | 0        | 3.80E-05 | 0        | 0 |
|          | 0        | 0        | 0        | 2.70E-05 | 0        | 0        | 0        | 0        | 0        | 0        | 5.60E-05 | 0        | 0        | 0        | 0 |
|          | 0        | 0        | 0        | 0        | 0        | 0        | 0        | 0        | 0        | 0        | 0        | 0        | 0        | 0        | 0 |
|          | 0        | 0        | 0        | 0        | 0        | 0        | 2.90E-05 | 0        | 0        | 0        | 1.70E-05 | 8.80E-05 | 0        | 0        | 0 |
|          | 0        | 0        | 0        | 0        | 0        | 0        | 0        | 0        | 0        | 0        | 0        | 0        | 0        | 0        | 0 |
| 7.50E-05 | 0        | 0        | 0        | 0        | 0        | 3.00E-05 | 0        | 0        | 0        | 0        | 0        | 0        | 0        | 1.53E-04 | 0 |
|          | 0        | 0        | 0        | 0        | 0        | 0        | 0        | 0        | 0        | 0        | 0        | 0        | 0        | 0        | 0 |
| 0.011568 | 0.012173 | 0.001216 | 0.00499  | 0.006977 | 0.005671 | 0.011924 | 6.28E-04 | 0.004026 | 0.005993 | 0.002476 | 0.005007 | 0.009059 | 0.007239 | 0.003047 | 0 |

| HC66     | HC28     | HC67     | HC36     | HC65     | HC02     | HC11     | HC18     | HC09     | HC24     | HC05     | HC06     | HC46     | HC53     | HC15     |
|----------|----------|----------|----------|----------|----------|----------|----------|----------|----------|----------|----------|----------|----------|----------|
| 0.308808 | 0.305411 | 0.299783 | 0.298263 | 0.294123 | 0.282843 | 0.2756   | 0.274148 | 0.266725 | 0.263241 | 0.247744 | 0.24434  | 0.21082  | 0.209447 | 0.196858 |
| 0.014526 | 0.0359   | 0.010998 | 0.0193   | 0.019488 | 0.012922 | 0.018429 | 2.94E-04 | 0.017592 | 0.007254 | 0        | 0.038527 | 0.005075 | 0.021293 | 0.002474 |
| 0.025991 | 0.350891 | 0.079052 | 0.105705 | 0.109493 | 0.128015 | 0.394537 | 0.12966  | 0.308804 | 0.142607 | 0.001142 | 0.369807 | 0.241877 | 0.339917 | 0.271429 |
| 0.041924 | 0.05929  | 0.071534 | 0.125673 | 0.051996 | 0.015942 | 0.039026 | 0.151561 | 0.089447 | 0.070929 | 0.026857 | 0.026887 | 0.038987 | 0.032503 | 0.078481 |
| 0.025318 | 0.056836 | 0.033229 | 0.115368 | 0.045791 | 0.011142 | 0.039769 | 0.21799  | 0.055191 | 0.080753 | 0.002032 | 0.038193 | 0.022412 | 0.025147 | 0.090195 |
| 6.57E-04 | 1.49E-04 | 5.70E-05 | 3.20E-05 | 0.004133 | 0.292524 | 0        | 0.001325 | 9.70E-05 | 3.13E-04 | 0.410534 | 0.002547 | 0.011551 | 2.92E-04 | 1.83E-04 |
| 0        | 3.60E-05 | 0.001242 | 1.05E-04 | 2.36E-04 | 2.20E-05 | 0        | 3.10E-04 | 8.20E-05 | 9.00E-05 | 1.54E-04 | 1.40E-05 | 0        | 1.80E-05 | 1.02E-04 |
| 0.097533 | 0.005988 | 0.019994 | 0.008893 | 0.010923 | 0.022939 | 0.010667 | 0.030119 | 0.006079 | 0.057413 | 1.00E-04 | 0.021256 | 0.001316 | 0.01138  | 0.004991 |
| 0.064035 | 0        | 0        | 0        | 0        | 0        | 0        | 0        | 4.30E-05 | 3.04E-04 | 0        | 6.24E-04 | 0        | 0        | 0        |
| 0        | 0        | 0        | 0        | 2.50E-05 | 0        | 0        | 4.20E-05 | 0        | 0        | 3.90E-04 | 0        | 0        | 0        | 0        |
| 0.001745 | 0.030462 | 0.055054 | 0.017241 | 0.008437 | 0.108402 | 0.022321 | 8.50E-05 | 0.01746  | 0.063438 | 0        | 0.033241 | 0.045052 | 0.071573 | 0.022375 |
| 0        | 3.90E-05 | 4.05E-04 | 1.02E-04 | 0.006682 | 0        | 0.01969  | 4.90E-05 | 0        | 1.04E-04 | 0        | 0        | 0.064561 | 0        | 4.30E-05 |
| 3.13E-04 | 0.001059 | 8.63E-04 | 1.35E-04 | 3.63E-04 | 3.30E-05 | 9.40E-04 | 4.45E-04 | 6.90E-04 | 7.69E-04 | 5.71E-04 | 5.71E-04 | 0.010463 | 0        | 6.21E-04 |
| 0.022517 | 0.007935 | 0.006876 | 0.072115 | 0.019906 | 9.10E-04 | 0.002986 | 0.02946  | 4.48E-04 | 0.00336  | 5.60E-05 | 6.46E-04 | 0.002769 | 0.034755 | 0.101345 |
| 0.002858 | 0.02077  | 0.018675 | 0.003843 | 0.00621  | 0.023867 | 0.015282 | 1.96E-04 | 0.018824 | 0.039047 | 0        | 0.010294 | 0.206445 | 0.038285 | 0.052392 |
| 3.07E-04 | 6.60E-05 | 0        | 3.40E-05 | 1.69E-04 | 0        | 7.00E-05 | 5.86E-04 | 8.00E-05 | 2.29E-04 | 6.72E-04 | 2.20E-05 | 1.80E-05 | 2.80E-05 | 1.41E-04 |
| 0.008317 | 0.023444 | 0.029961 | 0.047039 | 0.013957 | 0.008594 | 0.028696 | 0.008096 | 0.045002 | 0.025115 | 0.001771 | 0.014359 | 0.012858 | 0.015942 | 0.014103 |
| 0.007984 | 0.02114  | 0.004027 | 0.017742 | 0.005417 | 0.010541 | 0.046654 | 0.003497 | 0.014249 | 0.011323 | 1.12E-04 | 0.022182 | 0.015529 | 0.060914 | 0.009147 |
| 0.126297 | 0.001246 | 0.003744 | 0.003968 | 0.01251  | 0.004353 | 0.005959 | 0.002644 | 0.011106 | 0.013199 | 8.42E-04 | 0.014179 | 0        | 0.012012 | 3.00E-05 |
| 0.002739 | 0.005836 | 0.005989 | 0.032388 | 7.11E-04 | 5.85E-04 | 0.001616 | 0.009703 | 0.014747 | 0.00473  | 2.18E-04 | 0.002836 | 0.004326 | 0.004399 | 0.019033 |
| 0.001895 | 0.015593 | 0.014524 | 0.001463 | 2.34E-04 | 0.012508 | 0.045132 | 2.65E-04 | 0.056202 | 0.007264 | 4.70E-05 | 0.001039 | 0.02835  | 4.45E-04 | 0.006925 |
| 0.008332 | 0.011996 | 0.014833 | 0.002386 | 0.011431 | 0.006291 | 0.002784 | 0.030858 | 0        | 0.045151 | 0        | 0.067582 | 0.011977 | 0.021805 | 0.045282 |
| 0.003943 | 0.007097 | 0.006943 | 0.020904 | 0.004945 | 0.003815 | 0.009269 | 0.007893 | 0.014318 | 0.028584 | 0.001281 | 0.003483 | 0.008321 | 0.00372  | 0.010849 |
| 0.018748 | 6.00E-05 | 0.002409 | 0.001164 | 0.00307  | 0.001819 | 5.11E-04 | 0.005517 | 0.002788 | 0.004304 | 0.002049 | 0.003777 | 0.006919 | 0.005735 | 0.007467 |
| 3.20E-05 | 3.90E-05 | 0        | 0        | 4.70E-04 | 0        | 0        | 8.60E-05 | 0        | 3.04E-04 | 0.067686 | 0.021683 | 5.34E-04 | 0.001357 | 0        |
| 0.009916 | 0.002425 | 0.003987 | 0        | 3.16E-04 | 0.001992 | 3.90E-05 | 0        | 9.75E-04 | 0.001165 | 0.128783 | 0.001934 | 0.017104 | 6.88E-04 | 0.003856 |
| 0.012363 | 0        | 4.50E-04 | 7.45E-04 | 0.010569 | 3.33E-04 | 0        | 0.002997 | 0.010683 | 0.014252 | 2.49E-04 | 0.00178  | 0        | 1.10E-04 | 0.019539 |
| 7.16E-04 | 0.002433 | 0.005963 | 0.01017  | 0.019198 | 0.001499 | 0.001321 | 9.00E-05 | 0.002853 | 0.005789 | 0        | 0.002675 | 0.005232 | 0.001783 | 0.006072 |
| 0.001569 | 9.71E-04 | 0.021762 | 0.004456 | 0.00198  | 0.003359 | 0.001005 | 0.004574 | 0.001044 | 0.04199  | 0.001037 | 0.012929 | 2.92E-04 | 8.40E-04 | 2.49E-04 |
| 1.36E-04 | 4.10E-05 | 0        | 0        | 5.90E-05 | 0        | 3.20E-05 | 0        | 0        | 0        | 0        | 8.90E-05 | 1.61E-04 | 0        | 4.19E-04 |
| 0.010417 | 0.004464 | 0        | 0.019923 | 5.60E-05 | 0.012722 | 1.20E-04 | 4.20E-05 | 0        | 6.50E-05 | 8.90E-05 | 0.010982 | 3.34E-04 | 0.030975 | 0.001747 |
| 0        | 3.00E-05 | 0        | 0        | 0        | 2.80E-05 | 3.50E-05 | 8.70E-05 | 0        | 0        | 0        | 1.90E-05 | 3.22E-04 | 0        | 0        |
| 0.018817 | 0.003343 | 0.001531 | 0.009496 | 0.005152 | 0.001391 | 0.001519 | 0.007702 | 0.006179 | 0.008818 | 0.001118 | 0.002438 | 5.01E-04 | 0.007299 | 0.002733 |
| 5.80E-04 | 0.002772 | 0.002301 | 0.002632 | 0.005191 | 6.26E-04 | 0.002    | 4.90E-05 | 0.003713 | 0.014952 | 0        | 5.58E-04 | 0.003541 | 4.65E-04 | 0.005989 |
| 0.00353  | 0.005182 | 6.24E-04 | 4.20E-05 | 0.015518 | 0.001732 | 0.001468 | 0.03525  | 0.008913 | 1.56E-04 | 4.40E-05 | 0.003358 | 0        | 4.68E-04 | 4.50E-05 |
| 0        | 0        | 0        | 0.022002 | 0.260573 | 9.60E-04 | 0        | 0        | 0        | 0        | 0        | 0        | 1.11E-04 | 0        | 0        |
| 0.008018 | 3.35E-04 | 0.002382 | 0.010954 | 0.013592 | 0.001237 | 2.50E-04 | 0.005691 | 0.0027   | 0.008877 | 2.67E-04 | 0.002393 | 8.30E-05 | 0.00215  | 0.004141 |
| 0        | 4.05E-04 | 2.34E-04 | 6.70E-05 | 3.10E-05 | 0        | 7.10E-05 | 0        | 4.90E-05 | 2.18E-04 | 0.08295  | 4.52E-04 | 0.002373 | 8.50E-05 | 7.25E-04 |
| 0        | 0        | 0        | 0        | 0        | 0        | 0        | 0        | 0        | 0        | 0        | 0        | 0        | 0        | 0        |
| 0.009716 | 0        | 0.003353 | 0        | 7.50E-04 | 4.83E-04 | 0        | 4.60E-05 | 0        | 0.00526  | 0        | 0.003309 | 0        | 0.002176 | 0        |
| 7.40E-05 | 2.01E-04 | 5.70E-05 | 1.99E-04 | 2.26E-04 | 5.89E-04 | 0        | 0        | 0        | 2.23E-04 | 0        | 0        | 0        | 0        | 1.06E-04 |
| 0.001206 | 0.007436 | 0.005786 | 0.002701 | 0.002693 | 0.011872 | 0.004264 | 6.54E-04 | 0.001357 | 0.002475 | 0.001367 | 0.006359 | 0.001671 | 0.00361  | 0.002973 |
| 6.01E-04 | 0.004271 | 0.003267 | 0.002185 | 2.44E-04 | 0.001378 | 0.002693 | 0.007521 | 0.001441 | 0.003651 | 5.70E-05 | 0.001749 | 0.002726 | 0.002708 | 0.002254 |
| 0        | 0        | 0.226961 | 0        | 0        | 0        | 0        | 0        | 0        | 0        | 0        | 0        | 0        | 0        | 0        |
| 0.016204 | 2.69E-04 | 0.008109 | 0.002234 | 0.010686 | 5.90E-05 | 6.41E-04 | 1.06E-04 | 0        | 0.001032 | 0        | 1.85E-04 | 0        | 1.20E-04 | 0.001198 |
| 0.001542 | 0        | 9.07E-04 | 9.10E-05 | 2.20E-04 | 0        | 0        | 7.13E-04 | 4.40E-05 | 2.48E-04 | 0        | 2.61E-04 | 0        | 1.85E-04 | 0        |
| 0.055012 | 0        | 0.001087 | 0        | 0        | 0.001726 | 0        | 0        | 0.001179 | 0.002508 | 0        | 0.001523 | 0        | 0.001269 | 0        |
| 0        | 0        | 0.002271 | 0        | 0        | 8.23E-04 | 0        | 0        | 0.009133 | 0.003532 | 0        | 0        | 0        | 0.00971  | 0        |
| 0.00526  | 7.96E-04 | 5.30E-05 | 0.001339 | 1.93E-04 | 0.001351 | 3.99E-04 | 0.002027 | 0.001738 | 7.20E-04 | 2.77E-04 | 8.00E-06 | 1.16E-04 | 0        | 7.65E-04 |
| 7.60E-05 | 0        | 5.20E-05 | 0        | 1.97E-04 | 0        | 0        | 5.72E-04 | 4.30E-05 | 6.40E-05 | 1.59E-04 | 0        | 4.06E-04 | 0        | 1.03E-04 |
| 0.006986 | 3.27E-04 | 0        | 0.001212 | 0.001618 | 1.56E-04 | 3.00E-05 | 0.017394 | 4.20E-05 | 9.18E-04 | 4.33E-04 | 7.50E-05 | 2.60E-04 | 7.06E-04 | 0.001424 |
| 0        | 0        | 0        | 0        | 0        | 8.60E-05 | 6.60E-05 | 0        | 0        | 0        | 0.016014 | 4.40E-05 | 9.32E-04 | 9.45E-04 | 4.00E-05 |
| 0.011023 | 0        | 0.002132 | 0        | 0        | 0.001928 | 0        | 0        | 0        | 0        | 0        | 1.40E-05 | 0        | 0.006218 | 0        |
| 0        | 1.05E-04 | 0        | 0        | 0.010562 | 0        | 0        | 2.51E-04 | 0        | 0        | 0        | 0        | 0        | 0        | 0        |
| 0        | 0        | 0.010842 | 0        | 0        | 0        | 0        | 0        | 0        | 0        | 0        | 0        | 0        | 0        | 0        |
| 0.004434 | 1.13E-04 | 0.003707 | 0.001165 | 5.22E-04 | 2.76E-04 | 9.40E-05 | 5.20E-05 | 1.79E-04 | 0.00135  | 0        | 2.65E-04 | 0        | 6.43E-04 | 0        |

|          |          |          |          |          |          |          |          |          |          |          |          |          |          |          |   |
|----------|----------|----------|----------|----------|----------|----------|----------|----------|----------|----------|----------|----------|----------|----------|---|
| 0        | 0        | 0        | 0        | 0        | 0        | 0        | 0        | 0        | 0        | 0        | 0        | 0        | 0        | 0        | 0 |
| 0        | 0        | 0        | 0        | 0        | 0        | 0        | 0        | 0        | 0        | 0        | 0        | 0        | 0        | 0        | 0 |
| 6.12E-04 | 0.001367 | 3.34E-04 | 0.00183  | 0        | 1.25E-04 | 1.71E-04 | 0        | 8.48E-04 | 0.002889 | 0        | 5.60E-04 | 0        | 9.55E-04 | 0        | 0 |
| 3.60E-05 | 0        | 0        | 0        | 0        | 0        | 1.08E-04 | 0        | 5.20E-05 | 0        | 0        | 0        | 0        | 0        | 0        | 0 |
| 1.15E-04 | 0        | 0        | 0        | 0        | 0        | 0        | 1.69E-04 | 0        | 0        | 0        | 0        | 0        | 6.60E-05 | 0        | 0 |
| 0.002016 | 0        | 5.07E-04 | 1.18E-04 | 8.56E-04 | 2.24E-04 | 4.71E-04 | 2.70E-04 | 3.97E-04 | 6.26E-04 | 0        | 2.48E-04 | 0        | 2.60E-05 | 0        | 0 |
| 0        | 0        | 6.00E-05 | 3.90E-05 | 0        | 2.80E-05 | 0        | 0        | 0        | 0        | 0        | 2.00E-05 | 1.60E-05 | 0        | 4.20E-05 | 0 |
| 0        | 0        | 0        | 0        | 0        | 0        | 0        | 0        | 0        | 0        | 4.70E-05 | 0        | 0        | 0        | 0        | 0 |
| 0        | 1.11E-04 | 4.05E-04 | 0        | 4.20E-05 | 0        | 0.001533 | 0        | 3.88E-04 | 0        | 0        | 0.001343 | 0.005021 | 0        | 3.72E-04 | 0 |
| 0        | 0        | 0        | 0        | 3.30E-05 | 0        | 0        | 0        | 0        | 0        | 0.001674 | 0        | 0.002371 | 0.010068 | 3.60E-05 | 0 |
| 7.20E-05 | 0        | 0        | 0        | 2.70E-05 | 3.00E-05 | 3.40E-05 | 0        | 0        | 4.60E-05 | 0        | 3.30E-05 | 6.90E-05 | 2.40E-05 | 3.30E-05 | 0 |
| 0        | 0        | 7.13E-04 | 0        | 0        | 0        | 0        | 0        | 0        | 0        | 0        | 0        | 0        | 0        | 0        | 0 |
| 0        | 0        | 0        | 0        | 3.00E-05 | 0        | 0        | 0        | 0        | 4.60E-05 | 0        | 0        | 5.10E-05 | 0        | 0        | 0 |
| 0        | 0        | 0        | 0        | 0        | 8.00E-05 | 0        | 0        | 0        | 0        | 0        | 0        | 0        | 0        | 0        | 0 |
| 0        | 0        | 0        | 0        | 0        | 0        | 0        | 0        | 0        | 0        | 0        | 0        | 0        | 0        | 0        | 0 |
| 0        | 0        | 0        | 0        | 0        | 2.80E-05 | 0        | 0        | 0        | 0        | 0        | 1.70E-05 | 2.00E-05 | 0        | 8.70E-05 | 0 |
| 0.00107  | 0        | 0.001096 | 0.005755 | 0        | 6.10E-05 | 0        | 0        | 9.88E-04 | 1.33E-04 | 0        | 0        | 0        | 0        | 0        | 0 |
| 0.001932 | 0        | 0        | 0        | 0        | 5.90E-05 | 0        | 0        | 0        | 0        | 0        | 3.50E-05 | 0        | 0        | 0        | 0 |
| 0        | 0        | 0        | 0        | 0        | 0        | 0        | 0        | 0        | 0        | 0        | 0        | 0        | 0        | 0        | 0 |
| 0.031132 | 0.00132  | 0.008875 | 0.006782 | 0.008146 | 0.004692 | 0.001698 | 0.008914 | 0.005088 | 0.008172 | 0.001177 | 0.006256 | 0.006096 | 0.004741 | 0.010586 | 0 |

| HC48     | HC72     | HC54     | HC38     | HC41     | HC08     | HC60     | HC19     | HC62     | HC27     | HC47     | HC45     | HC52     | HC13     | HC10     |
|----------|----------|----------|----------|----------|----------|----------|----------|----------|----------|----------|----------|----------|----------|----------|
| 0.196403 | 0.191434 | 0.178511 | 0.174872 | 0.172555 | 0.157823 | 0.149078 | 0.135467 | 0.133597 | 0.114696 | 0.113318 | 0.098563 | 0.097215 | 0.086384 | 0.08337  |
| 3.14E-04 | 0.02654  | 0.076989 | 0.005473 | 0.006053 | 0.021446 | 0.006929 | 0.012382 | 0.022013 | 0.030044 | 0.026447 | 0.003024 | 0.030051 | 0.023212 | 9.70E-05 |
| 0.138829 | 0.034025 | 0.051977 | 0.154356 | 0.229731 | 0.077887 | 0.065375 | 0.077276 | 0.057623 | 0.071135 | 0.012721 | 0.013687 | 0.221875 | 0.125534 | 0.385758 |
| 0.15197  | 0.046996 | 0.059299 | 0.031758 | 0.245492 | 0.085992 | 0.049535 | 0.05041  | 0.054634 | 0.047367 | 0.027924 | 0.165789 | 0.079937 | 0.107094 | 0.005999 |
| 0.009701 | 0.108207 | 0.043123 | 0.027986 | 0.062095 | 0.124495 | 0.050709 | 0.030254 | 0.025532 | 0.050812 | 0.058173 | 0.023846 | 0.051501 | 0.244966 | 0        |
| 0.158586 | 7.97E-04 | 3.35E-04 | 0        | 3.00E-05 | 6.19E-04 | 0.011132 | 0.244366 | 0.001416 | 0.002475 | 0        | 0        | 0.003023 | 4.60E-05 | 0        |
| 1.80E-05 | 1.07E-04 | 0.099996 | 0.338265 | 6.10E-05 | 1.51E-04 | 0.227194 | 0.104987 | 0.09267  | 0.008137 | 0        | 0.019181 | 6.60E-04 | 1.61E-04 | 2.20E-05 |
| 2.10E-04 | 0.109988 | 0.055326 | 0.014397 | 0.07405  | 0.140514 | 0.123547 | 0.052852 | 0.216339 | 0.365211 | 0.187966 | 0.009981 | 0.007323 | 0.018056 | 8.65E-04 |
| 0        | 1.58E-04 | 4.08E-04 | 3.00E-05 | 0        | 0        | 0        | 9.70E-05 | 0.00381  | 4.00E-05 | 0        | 0        | 0        | 0        | 0        |
| 0        | 0        | 1.51E-04 | 0        | 0        | 0        | 0        | 1.19E-04 | 0        | 1.60E-05 | 0        | 0        | 0        | 0        | 0.006033 |
| 0.018933 | 0.0452   | 0.068603 | 0.064038 | 0.013819 | 0.035915 | 0.016611 | 0.040409 | 0.039352 | 0.025828 | 0.001714 | 0.014589 | 0.069263 | 0.118555 | 0        |
| 0        | 0.002193 | 0.07209  | 0.016926 | 0        | 0.005294 | 0.025515 | 1.18E-04 | 4.00E-05 | 0.045548 | 0        | 0.483683 | 0.200263 | 4.40E-05 | 0.025818 |
| 1.68E-04 | 2.27E-04 | 1.24E-04 | 0        | 4.50E-04 | 0.001577 | 0.002484 | 1.77E-04 | 3.30E-05 | 1.25E-04 | 7.90E-04 | 2.34E-04 | 2.54E-04 | 2.33E-04 | 0.010225 |
| 0        | 1.85E-04 | 7.75E-04 | 2.55E-04 | 5.60E-05 | 0.003016 | 7.87E-04 | 0.004309 | 0.003695 | 0.014629 | 0.112797 | 0        | 0.005043 | 0.009902 | 0.245175 |
| 0.013315 | 0.038257 | 0.009378 | 0.015349 | 0.004614 | 0.012153 | 0.008367 | 0.016152 | 0.011025 | 0.006444 | 0.001283 | 0.001692 | 0.049682 | 0.018792 | 0        |
| 1.82E-04 | 1.78E-04 | 0        | 0.003001 | 3.30E-05 | 1.52E-04 | 0.01036  | 5.80E-05 | 6.22E-04 | 0.003044 | 0.001445 | 0        | 1.23E-04 | 1.71E-04 | 0.035129 |
| 0.006554 | 0.015845 | 0.019196 | 0.026331 | 0.077829 | 0.032782 | 0.009837 | 0.018517 | 0.015342 | 0.013994 | 0.008496 | 0.014573 | 0.016961 | 0.042077 | 0.001301 |
| 3.07E-04 | 0.008534 | 0.004243 | 0.009272 | 0.030481 | 0.019054 | 0.006508 | 0.006065 | 0.004984 | 0.007233 | 0.011341 | 0.002212 | 0.017749 | 0.017315 | 0.079382 |
| 0        | 0.064095 | 0.033634 | 0.001285 | 0.002333 | 0.020837 | 0.002476 | 0.037963 | 0.060657 | 0.015309 | 0.147037 | 7.19E-04 | 0.027422 | 0.016121 | 0        |
| 0.011799 | 0.001329 | 4.85E-04 | 0.001318 | 0.00262  | 0.005859 | 0.005641 | 0.004789 | 8.03E-04 | 3.35E-04 | 0.031312 | 0.001201 | 0.001223 | 0.017792 | 0        |
| 0.151384 | 0.001882 | 0.0043   | 0.007379 | 0.006251 | 0.011178 | 0.006141 | 0.007034 | 0.016844 | 0.005073 | 3.70E-05 | 0.012277 | 0.005166 | 0.00709  | 0        |
| 0        | 0.007233 | 0.007024 | 0.018049 | 0.006448 | 0.029303 | 0.009468 | 0.016688 | 0.006896 | 0.002611 | 0.016024 | 0        | 0.021536 | 0.039875 | 0        |
| 4.63E-04 | 0.020918 | 0.009301 | 0.005208 | 0.017067 | 0.06704  | 0.005233 | 0.008345 | 0.010357 | 0.003297 | 0.006251 | 0.029572 | 0.020061 | 0.010253 | 0        |
| 0.006738 | 7.96E-04 | 0.00589  | 0.002838 | 0.001564 | 5.60E-05 | 0.003827 | 0.002365 | 0.006795 | 0.00399  | 0.004601 | 0.002707 | 0.011501 | 0.006569 | 0.017985 |
| 0.09661  | 0        | 1.10E-04 | 0        | 3.60E-05 | 0        | 0        | 0.007941 | 0        | 2.52E-04 | 3.00E-05 | 0        | 0.00107  | 4.29E-04 | 4.20E-05 |
| 0.004348 | 1.51E-04 | 2.94E-04 | 0.002454 | 0.004562 | 5.80E-05 | 0.010933 | 0.001456 | 0.002698 | 7.74E-04 | 0        | 0.001134 | 0.002563 | 0        | 0.02074  |
| 0        | 0.009814 | 9.84E-04 | 0.001436 | 0.006329 | 0.005025 | 0.006623 | 7.07E-04 | 0.009679 | 0.004858 | 0.01985  | 0.013602 | 0.003813 | 3.59E-04 | 8.40E-05 |
| 4.80E-05 | 0.004613 | 0.009852 | 0.001865 | 0.001622 | 0.003439 | 0.006326 | 0.001403 | 0.007673 | 0.003675 | 0.007197 | 0.006608 | 5.69E-04 | 0.011609 | 1.35E-04 |
| 3.48E-04 | 0.002782 | 0.049197 | 0.010548 | 0.003213 | 0.042583 | 0.039399 | 0.026824 | 0.0267   | 0.012405 | 0.002681 | 0.001292 | 9.05E-04 | 0.002526 | 1.99E-04 |
| 0        | 1.18E-04 | 5.70E-05 | 3.40E-05 | 0        | 3.90E-05 | 3.50E-05 | 0        | 2.10E-05 | 8.70E-05 | 3.29E-04 | 1.58E-04 | 1.77E-04 | 3.90E-05 | 0        |
| 0        | 0        | 0.08022  | 0.006809 | 0        | 0        | 0.006336 | 0.031676 | 0        | 0.024097 | 0        | 0        | 0.0119   | 0.021992 | 0        |
| 4.00E-05 | 0        | 0        | 0        | 2.70E-05 | 5.00E-05 | 0        | 0        | 0        | 4.20E-05 | 0        | 0        | 3.30E-05 | 0        | 1.79E-04 |
| 2.10E-05 | 0.014493 | 0.001506 | 0.001934 | 8.97E-04 | 0.005806 | 0.011721 | 0.016167 | 0.020993 | 0.005989 | 0.006914 | 7.86E-04 | 0.004929 | 9.64E-04 | 0.021809 |
| 0        | 0.010491 | 0.001491 | 0.003459 | 0.003044 | 0.009735 | 6.89E-04 | 8.90E-04 | 1.07E-04 | 5.27E-04 | 0.004987 | 4.02E-04 | 0.001863 | 0.007332 | 9.70E-05 |
| 0.003239 | 7.51E-04 | 3.10E-05 | 0.001468 | 9.20E-05 | 0        | 4.50E-05 | 0.004257 | 0.001701 | 1.34E-04 | 1.06E-04 | 0.005128 | 0.005337 | 0        | 0        |
| 0        | 0        | 0.010202 | 0        | 0        | 0        | 0        | 0        | 0.07062  | 0.035475 | 0        | 0        | 0        | 0        | 0        |
| 0        | 0.021346 | 0.007203 | 0.001444 | 7.90E-04 | 0.004851 | 0.004716 | 0.002457 | 0.004227 | 0.003652 | 0.009195 | 0.003387 | 0.002329 | 0.003691 | 0        |
| 5.20E-05 | 0        | 0        | 0        | 3.64E-04 | 1.45E-04 | 1.74E-04 | 1.19E-04 | 0        | 2.40E-05 | 0        | 0        | 3.50E-05 | 1.42E-04 | 9.31E-04 |
| 0        | 0        | 0        | 0        | 0        | 0        | 0        | 0        | 0        | 0        | 0        | 0        | 0        | 0        | 0        |
| 0        | 0.107542 | 0.010411 | 0.002922 | 0.004746 | 0.007592 | 0.010459 | 0.001657 | 0.006679 | 0.008522 | 0.020912 | 0        | 0        | 0.002191 | 0        |
| 0        | 0        | 0        | 7.20E-05 | 6.00E-05 | 0        | 7.50E-05 | 0        | 2.59E-04 | 0        | 0.04357  | 3.60E-05 | 0        | 0        | 0.032519 |
| 0.005287 | 6.27E-04 | 0.005036 | 0.009194 | 0.002568 | 0.001734 | 0.001096 | 0.00474  | 0.001003 | 0.001306 | 0.003084 | 0.003473 | 0.001134 | 0.004604 | 3.47E-04 |
| 0.002262 | 0.002577 | 0.002945 | 0.003828 | 0.007944 | 0.002497 | 0.001393 | 0.001447 | 0.006169 | 0.003909 | 0.002778 | 7.08E-04 | 0.002862 | 0.004436 | 8.10E-04 |
| 0        | 0        | 0        | 0        | 0        | 0        | 0        | 0        | 0        | 0        | 0        | 0        | 0        | 0        | 0        |
| 0        | 1.62E-04 | 0.007028 | 5.14E-04 | 9.66E-04 | 0.00332  | 0.00373  | 8.80E-05 | 0.002706 | 3.34E-04 | 2.07E-04 | 1.44E-04 | 0.001164 | 0.005925 | 0.004833 |
| 2.60E-05 | 0.032658 | 2.53E-04 | 1.05E-04 | 1.38E-04 | 5.41E-04 | 0.009302 | 1.56E-04 | 0.00233  | 0.013976 | 0.010442 | 0        | 1.23E-04 | 0.00289  | 0        |
| 0        | 0.007052 | 0        | 0        | 8.52E-04 | 0.004802 | 4.15E-04 | 0.005219 | 0.010046 | 0.007608 | 0.039798 | 0        | 1.20E-05 | 0.00212  | 0        |
| 0        | 0.005088 | 0        | 0.001265 | 0        | 0.005082 | 8.83E-04 | 0        | 0        | 0.001437 | 0        | 0.003825 | 0        | 0        | 4.27E-04 |
| 0.01016  | 5.51E-04 | 1.47E-04 | 2.66E-04 | 6.50E-05 | 0.004516 | 3.90E-05 | 5.50E-05 | 3.86E-04 | 9.17E-04 | 0        | 0.003625 | 0.002875 | 0.001118 | 0        |
| 3.46E-04 | 0        | 0        | 0        | 0        | 0        | 0        | 0        | 0        | 0        | 0        | 0.004842 | 5.34E-04 | 0        | 0        |
| 5.10E-05 | 0.001826 | 5.20E-05 | 0        | 3.50E-05 | 1.56E-04 | 6.82E-04 | 1.07E-04 | 5.71E-04 | 4.50E-05 | 6.15E-04 | 4.20E-05 | 4.43E-04 | 2.27E-04 | 5.28E-04 |
| 0.006751 | 0        | 0        | 0        | 0        | 0        | 0        | 0.003239 | 3.10E-05 | 1.60E-05 | 0        | 0        | 0        | 0        | 0        |
| 0        | 0.003077 | 5.30E-05 | 1.23E-04 | 0        | 5.20E-05 | 0.006736 | 0        | 0.008566 | 0.010105 | 0.017997 | 0        | 0.005856 | 3.42E-04 | 1.53E-04 |
| 0        | 0        | 0        | 0        | 0        | 0        | 0        | 0        | 0        | 0        | 0        | 0        | 0        | 0        | 0        |
| 0        | 0        | 0        | 0.010692 | 0        | 0.02974  | 0.012816 | 0        | 0        | 0.003111 | 0        | 0        | 0.001289 | 0        | 0        |
| 0        | 0.001177 | 7.69E-04 | 0.007824 | 3.14E-04 | 0.00114  | 0.002827 | 0.002186 | 0.005782 | 0.001279 | 0.016668 | 5.41E-04 | 2.64E-04 | 4.90E-04 | 0        |

|          |          |          |          |          |          |          |          |          |          |          |          |          |          |          |   |
|----------|----------|----------|----------|----------|----------|----------|----------|----------|----------|----------|----------|----------|----------|----------|---|
| 0        | 0        | 0        | 0        | 0        | 0        | 3.60E-05 | 0        | 0        | 0        | 0        | 0        | 0        | 0        | 0        | 0 |
| 0        | 0        | 0        | 0        | 0        | 0        | 0.001239 | 0        | 0        | 0        | 0.002688 | 0.036436 | 1.60E-05 | 0        | 0        | 0 |
| 0        | 0.011565 | 0.001793 | 2.66E-04 | 0.002065 | 2.99E-04 | 0.0023   | 7.13E-04 | 0.001823 | 7.24E-04 | 0.001488 | 0.002522 | 8.48E-04 | 0.004081 | 0        | 0 |
| 0        | 0        | 0        | 0        | 0        | 0        | 3.30E-05 | 0        | 0        | 0        | 0        | 5.90E-05 | 0        | 0        | 0        | 0 |
| 0        | 0        | 0        | 0        | 0        | 0        | 0        | 0        | 0        | 1.70E-05 | 1.58E-04 | 0        | 0        | 0        | 0        | 0 |
| 0        | 0.002226 | 0        | 1.18E-04 | 2.21E-04 | 0.002328 | 0.003009 | 0.002005 | 0.001541 | 0.001345 | 8.47E-04 | 1.31E-04 | 1.50E-05 | 3.97E-04 | 0        | 0 |
| 0        | 1.80E-05 | 0        | 0        | 0        | 0        | 0        | 0        | 0        | 0        | 0        | 0        | 0        | 0        | 1.80E-05 | 0 |
| 0        | 1.53E-04 | 0        | 0.001956 | 0        | 0        | 0        | 0        | 0        | 0        | 0        | 0        | 0        | 0        | 0        | 0 |
| 0        | 0        | 0        | 1.18E-04 | 0.00107  | 2.51E-04 | 1.32E-04 | 0        | 3.40E-05 | 0        | 0        | 0        | 6.30E-04 | 0        | 5.57E-04 | 0 |
| 0.001473 | 0        | 0        | 0        | 0        | 0        | 0        | 1.22E-04 | 0        | 0        | 0        | 0        | 0        | 3.60E-05 | 0.016239 | 0 |
| 1.90E-05 | 1.70E-05 | 1.24E-04 | 0        | 0        | 5.60E-05 | 0        | 0        | 0        | 1.20E-05 | 0        | 3.80E-05 | 0        | 0        | 0        | 0 |
| 0        | 0        | 0        | 0        | 0        | 0        | 0.039062 | 0        | 0        | 0        | 0        | 0        | 0        | 0        | 0        | 0 |
| 0        | 0        | 0        | 2.60E-05 | 2.40E-05 | 0        | 0        | 0        | 0        | 0        | 0        | 0        | 0        | 0        | 0        | 0 |
| 0        | 0        | 0        | 0        | 0        | 0        | 1.37E-04 | 0        | 0        | 0        | 0        | 0        | 0        | 0        | 0        | 0 |
| 0        | 0        | 0        | 0        | 0        | 0        | 0        | 0        | 0        | 0        | 0        | 0        | 0        | 0        | 0        | 0 |
| 0        | 2.00E-05 | 0        | 0        | 0        | 0        | 0        | 0        | 0        | 1.80E-05 | 0        | 0        | 0        | 0        | 0        | 0 |
| 0        | 0.011035 | 0        | 0        | 0        | 0        | 0        | 0        | 0        | 0        | 0        | 0        | 0        | 0        | 0        | 0 |
| 0        | 1.21E-04 | 0        | 0        | 0        | 0        | 0        | 0        | 0        | 4.20E-05 | 9.58E-04 | 0        | 0        | 0        | 0        | 0 |
| 0        | 0        | 0        | 0        | 0        | 0        | 0        | 0        | 0        | 0        | 0        | 0        | 0        | 0        | 0        | 0 |
| 0.003045 | 0.022825 | 0.009084 | 0.010874 | 0.004324 | 0.01102  | 0.019848 | 0.01317  | 0.022465 | 0.015893 | 0.016824 | 0.013551 | 0.00858  | 0.011818 | 0.002194 | 0 |

| HC68     | HC43     | HC25     | HC12     | HC58     | HC44     | HC22     | HC61     | HC23     | HC50     | HC40     | HC35     | HC32     | HC59     | HC42     |
|----------|----------|----------|----------|----------|----------|----------|----------|----------|----------|----------|----------|----------|----------|----------|
| 0.081942 | 0.077014 | 0.073289 | 0.063356 | 0.060638 | 0.057204 | 0.04406  | 0.038516 | 0.030468 | 0.027097 | 0.020953 | 0.02009  | 0.019934 | 0.017812 | 0.001876 |
| 0.003482 | 0.029951 | 0.01298  | 0.008535 | 0.007565 | 0.026729 | 0.011019 | 0.005249 | 0.014714 | 0.040337 | 0.006316 | 0.007407 | 0.011787 | 0.015191 | 0.001123 |
| 0.128978 | 0.226758 | 0.098662 | 0.058206 | 0.030241 | 0.369295 | 0.066474 | 0.060181 | 0.110501 | 0.130276 | 0.362303 | 0.182414 | 0.092576 | 0.073034 | 0.00652  |
| 0.085939 | 0.053083 | 0.059211 | 0.037475 | 0.156142 | 0.082162 | 0.089517 | 0.076858 | 0.046375 | 0.091985 | 0.018834 | 0.033905 | 0.023    | 0.021478 | 0.005252 |
| 0.059451 | 0.043562 | 0.072068 | 0.056069 | 0.033966 | 0.031881 | 0.07846  | 0.030869 | 0.044778 | 0.08303  | 0.03017  | 0.074092 | 0.022437 | 0.053214 | 0.00319  |
| 0.023347 | 4.10E-05 | 0.005079 | 0.002568 | 7.55E-04 | 1.68E-04 | 0.332961 | 6.45E-04 | 0.002195 | 9.69E-04 | 2.69E-04 | 0        | 0        | 8.48E-04 | 1.54E-04 |
| 3.00E-05 | 0.341739 | 0.479599 | 0.473365 | 0.135651 | 0        | 6.45E-04 | 0.279987 | 0.535504 | 0.094533 | 0.439739 | 0.240076 | 0.681331 | 0.511677 | 0.830509 |
| 0.001157 | 0.011552 | 0.033265 | 0.020051 | 0.098842 | 0.012308 | 0.002373 | 0.216861 | 0.014486 | 0.261955 | 0.027065 | 0.011431 | 0.003205 | 0.039819 | 3.10E-04 |
| 0        | 0.001969 | 0        | 0.001095 | 0        | 3.60E-05 | 0        | 0        | 0        | 2.71E-04 | 2.65E-04 | 0        | 9.10E-05 | 0        | 0        |
| 0        | 0        | 6.30E-05 | 8.20E-05 | 0        | 0        | 0.007114 | 0        | 4.20E-05 | 9.50E-05 | 0        | 0        | 0        | 0        | 0        |
| 0.096644 | 0.017889 | 0.011268 | 0.030842 | 0.012859 | 0.058164 | 0.045048 | 0.062379 | 0.020824 | 0.009132 | 0.004774 | 0.020086 | 0.017011 | 0.015276 | 0.00453  |
| 0.344976 | 0.005656 | 1.26E-04 | 4.42E-04 | 0.108765 | 0        | 5.10E-05 | 0.013282 | 0.00894  | 0.021126 | 0        | 7.88E-04 | 1.48E-04 | 1.19E-04 | 0.114668 |
| 2.99E-04 | 1.07E-04 | 3.55E-04 | 3.41E-04 | 0.001016 | 6.08E-04 | 3.20E-04 | 1.26E-04 | 2.03E-04 | 7.60E-05 | 2.49E-04 | 0.012846 | 0.003594 | 0.004872 | 2.69E-04 |
| 0.022308 | 0.002785 | 0        | 0.001657 | 9.50E-05 | 0.045582 | 1.08E-04 | 5.50E-05 | 0        | 2.71E-04 | 9.12E-04 | 9.26E-04 | 0.001831 | 0.036529 | 3.78E-04 |
| 0.010029 | 0.018356 | 0.02529  | 0.006463 | 0.043035 | 0.008779 | 0.051365 | 0.003234 | 0.006561 | 0.008215 | 0.005421 | 0.016306 | 0.012957 | 0.012884 | 4.59E-04 |
| 8.00E-05 | 4.00E-05 | 0        | 0        | 0.002583 | 0        | 1.85E-04 | 0.002159 | 2.99E-04 | 7.86E-04 | 0        | 0        | 0.001264 | 0.001077 | 5.45E-04 |
| 0.032237 | 0.029378 | 0.016102 | 0.034495 | 0.009555 | 0.023977 | 0.010435 | 0.01544  | 0.015534 | 0.022311 | 0.01165  | 0.025252 | 0.019394 | 0.01709  | 0.001043 |
| 0.010225 | 0.018894 | 0.007049 | 0.005423 | 0.004487 | 0.030215 | 0.001404 | 0.014277 | 0.029404 | 0.020701 | 0.007837 | 0.026543 | 0.00613  | 0.006062 | 6.40E-04 |
| 6.03E-04 | 9.18E-04 | 0.017045 | 0.009947 | 0.085793 | 0.001112 | 7.17E-04 | 0.011219 | 6.32E-04 | 0.014836 | 0.001855 | 0.004192 | 4.50E-04 | 0.00372  | 0        |
| 0.003129 | 0.009445 | 0.00504  | 0.006498 | 0.001373 | 0.008514 | 6.64E-04 | 9.33E-04 | 5.24E-04 | 0.001711 | 0.002879 | 0.012068 | 0.00357  | 0.012382 | 1.56E-04 |
| 0.013035 | 0.010963 | 0.002996 | 0.003879 | 0.006204 | 0.078565 | 0.050741 | 0.015235 | 0.006975 | 0.001033 | 0.00722  | 0.001585 | 0.022794 | 0.00308  | 0.00372  |
| 0.00253  | 0.010418 | 0.001268 | 0.014491 | 0.012246 | 0.009812 | 0.002891 | 0.006707 | 3.64E-04 | 0.012497 | 0.003497 | 0.003361 | 0.004126 | 0.021991 | 0        |
| 0.008377 | 0.008536 | 0.009822 | 0.011608 | 0.010321 | 0.012884 | 0.045077 | 0.004184 | 0.006992 | 0.009235 | 0.005649 | 0.003902 | 0.004849 | 0.005473 | 5.45E-04 |
| 0.008381 | 0.002452 | 3.76E-04 | 3.24E-04 | 0.002788 | 3.40E-04 | 0.011212 | 4.32E-04 | 0.001493 | 0.005453 | 0.001023 | 0.044767 | 0.002581 | 0.016363 | 0.001994 |
| 0        | 5.18E-04 | 6.70E-05 | 0        | 0        | 0        | 0        | 0        | 7.14E-04 | 0        | 0        | 0.062247 | 0.011331 | 0        | 0.004858 |
| 0.006708 | 3.29E-04 | 7.00E-05 | 0.00253  | 0.003785 | 0.09771  | 0.020784 | 6.00E-05 | 0.001565 | 0.001808 | 0.001736 | 0.108546 | 8.81E-04 | 4.15E-04 | 2.62E-04 |
| 0.001572 | 4.40E-05 | 0.021096 | 0.002068 | 0.066022 | 0.001032 | 0        | 0.016275 | 1.94E-04 | 0.005451 | 0        | 0.030727 | 0        | 2.02E-04 | 1.29E-04 |
| 0.006242 | 8.53E-04 | 0.004562 | 0.001587 | 0.009032 | 0.00266  | 4.40E-05 | 0.005891 | 0.005944 | 0.009778 | 0.002134 | 0.009219 | 0.001614 | 0.006544 | 1.89E-04 |
| 0.001865 | 0.00368  | 0.003046 | 0.001411 | 0.003344 | 4.67E-04 | 0.003126 | 0.023713 | 0.001707 | 0.005434 | 0.009541 | 0.00647  | 9.02E-04 | 0.01526  | 1.91E-04 |
| 1.53E-04 | 3.80E-05 | 0        | 0        | 5.60E-05 | 2.04E-04 | 7.90E-05 | 0        | 1.17E-04 | 0        | 0        | 0        | 1.39E-04 | 8.40E-05 | 2.60E-05 |
| 4.48E-04 | 0.002196 | 1.09E-04 | 0        | 1.56E-04 | 2.20E-05 | 3.69E-04 | 0        | 0.011573 | 0.02108  | 0.016053 | 9.20E-05 | 0.004811 | 0.032013 | 0        |
| 0        | 0        | 0        | 0        | 5.10E-05 | 6.50E-05 | 8.40E-05 | 0        | 0        | 0        | 0        | 2.96E-04 | 9.20E-05 | 0        | 0        |
| 4.57E-04 | 0.006262 | 0.007523 | 0.003622 | 0.019788 | 4.88E-04 | 0        | 0.006556 | 0.001636 | 0.004382 | 6.26E-04 | 0.001478 | 3.63E-04 | 0.004601 | 8.00E-05 |
| 0.002251 | 0.00154  | 0.002704 | 0.00168  | 0.001821 | 0.002029 | 0.006807 | 6.25E-04 | 6.04E-04 | 3.45E-04 | 5.24E-04 | 0        | 0        | 0.003643 | 2.90E-05 |
| 0.011923 | 0.004519 | 5.79E-04 | 0.001341 | 0        | 0.01423  | 0        | 3.32E-04 | 7.96E-04 | 7.20E-04 | 0        | 0        | 2.12E-04 | 0.002115 | 0        |
| 0        | 0        | 0        | 0        | 0        | 0        | 0        | 0.021503 | 0        | 9.50E-05 | 0        | 5.20E-05 | 0        | 0        | 8.42E-04 |
| 0.00161  | 0.004613 | 0.002472 | 0.004887 | 0.008271 | 0.00161  | 0.002773 | 0.004417 | 0.002638 | 0.004759 | 0.0015   | 0.00357  | 7.38E-04 | 0.001682 | 2.51E-04 |
| 0.003006 | 3.44E-04 | 0        | 9.40E-05 | 2.35E-04 | 0.001039 | 1.86E-04 | 0        | 0        | 2.47E-04 | 0        | 0.001106 | 0.002763 | 1.23E-04 | 6.60E-05 |
| 0        | 0        | 0        | 0        | 0        | 0        | 0        | 0        | 0        | 0        | 0        | 0        | 0        | 0        | 0        |
| 1.01E-04 | 0.005192 | 7.64E-04 | 0.002775 | 0.012585 | 0        | 0        | 0.003503 | 0.001219 | 0.005408 | 2.41E-04 | 0        | 0        | 6.25E-04 | 0        |
| 1.87E-04 | 4.19E-04 | 0        | 4.90E-05 | 4.80E-05 | 0.002742 | 0        | 0.005057 | 0.005177 | 4.50E-04 | 2.46E-04 | 0.00184  | 7.49E-04 | 0        | 1.85E-04 |
| 0.004539 | 0.001329 | 9.72E-04 | 0.001208 | 0.001203 | 0.003271 | 0.010716 | 9.38E-04 | 0.001033 | 0.003093 | 0.001705 | 0.001653 | 4.04E-04 | 4.30E-04 | 1.74E-04 |
| 0.004068 | 0.002825 | 0.002761 | 0.001622 | 0.002364 | 0.00654  | 0.002404 | 0.003355 | 0.00186  | 0.021314 | 0.001672 | 0.005957 | 3.99E-04 | 0.001885 | 3.40E-04 |
| 0        | 0        | 0        | 0        | 0        | 0        | 0        | 0        | 0        | 0        | 0        | 0        | 0        | 0        | 0        |
| 0        | 0        | 8.03E-04 | 2.80E-04 | 8.69E-04 | 0        | 0        | 0.001518 | 9.45E-04 | 0        | 2.55E-04 | 0.001406 | 0.001235 | 0        | 0.008571 |
| 2.77E-04 | 0        | 1.63E-04 | 1.61E-04 | 0.010829 | 0        | 1.17E-04 | 0.023034 | 0.002812 | 0.007673 | 1.20E-04 | 0.002322 | 0        | 5.56E-04 | 0        |
| 7.40E-05 | 0        | 0.001683 | 0.003389 | 1.42E-04 | 5.28E-04 | 0        | 0        | 0        | 0.001416 | 0.001397 | 0        | 9.20E-05 | 0.004493 | 0        |
| 3.60E-05 | 0        | 0.002344 | 0        | 0.00351  | 0.001096 | 0        | 2.85E-04 | 0.00111  | 0.001049 | 2.57E-04 | 2.01E-04 | 0        | 2.69E-04 | 0        |
| 0.002759 | 0        | 0        | 0        | 0        | 0.001511 | 0.00215  | 3.80E-05 | 0        | 1.72E-04 | 0        | 0        | 0        | 3.24E-04 | 0        |
| 2.05E-04 | 0        | 0        | 0        | 5.45E-04 | 0        | 0        | 0        | 4.00E-05 | 0        | 0        | 5.90E-05 | 0        | 0        | 0        |
| 0        | 4.71E-04 | 0        | 9.80E-05 | 9.42E-04 | 0        | 1.04E-04 | 1.63E-04 | 1.57E-04 | 0        | 0        | 1.12E-04 | 0        | 0        | 0        |
| 1.13E-04 | 3.70E-05 | 0        | 4.70E-05 | 5.74E-04 | 0        | 0.092949 | 0        | 1.67E-04 | 0        | 0        | 0        | 0        | 0        | 0        |
| 0        | 0        | 1.10E-04 | 4.94E-04 | 0.001207 | 0        | 0        | 0.004824 | 0.009096 | 0.020722 | 6.32E-04 | 0.001437 | 0        | 0        | 0        |
| 0        | 0        | 0        | 0        | 0        | 0        | 0        | 9.70E-05 | 0        | 0        | 0        | 0        | 0        | 0        | 0        |
| 0        | 0        | 0        | 0        | 0        | 0        | 0        | 0        | 0.002244 | 0        | 0        | 0.005244 | 0        | 0        | 0        |
| 0        | 0.012489 | 5.85E-04 | 0.00204  | 0.001187 | 0        | 0        | 0.001227 | 0.001466 | 0.002978 | 8.73E-04 | 9.00E-04 | 2.67E-04 | 5.49E-04 | 2.80E-05 |

|          |          |          |          |          |          |          |          |          |          |          |          |          |          |          |
|----------|----------|----------|----------|----------|----------|----------|----------|----------|----------|----------|----------|----------|----------|----------|
| 0        | 0        | 0        | 0        | 0        | 0        | 3.40E-05 | 0        | 0        | 0        | 0        | 0        | 0        | 0        | 7.80E-05 |
| 0        | 0        | 0        | 0        | 0        | 0        | 4.20E-05 | 0.008527 | 0.031074 | 8.90E-05 | 0        | 0        | 0        | 0.013616 | 0        |
| 2.07E-04 | 1.61E-04 | 4.85E-04 | 1.76E-04 | 0.004626 | 6.90E-05 | 3.56E-04 | 0.001402 | 9.21E-04 | 8.26E-04 | 4.92E-04 | 0.002988 | 5.60E-05 | 9.80E-05 | 3.50E-05 |
| 0        | 2.90E-05 | 5.50E-05 | 0.06675  | 0        | 0        | 0        | 0        | 3.61E-04 | 0        | 0        | 0        | 0        | 0        | 0        |
| 0        | 0        | 0        | 0        | 4.50E-05 | 0        | 0        | 0        | 0        | 0        | 0        | 0        | 0        | 0        | 0        |
| 3.40E-05 | 9.49E-04 | 0.0011   | 0.001163 | 4.96E-04 | 6.00E-05 | 0        | 2.81E-04 | 5.25E-04 | 8.00E-05 | 0        | 0        | 0        | 0.001198 | 0        |
| 0        | 0        | 0        | 0        | 0        | 0        | 0        | 0        | 0        | 0        | 0        | 0        | 4.60E-05 | 0        | 1.44E-04 |
| 0        | 0.017861 | 0        | 0.019883 | 0        | 0        | 0        | 0        | 0        | 3.23E-04 | 0        | 0        | 0        | 0.011331 | 0        |
| 9.04E-04 | 0.001409 | 0        | 1.01E-04 | 0        | 6.60E-05 | 0        | 0        | 4.00E-05 | 0        | 1.24E-04 | 0.001372 | 0.013257 | 1.79E-04 | 1.31E-04 |
| 0        | 3.91E-04 | 1.01E-04 | 0        | 1.54E-04 | 0        | 3.40E-05 | 0        | 0.002106 | 0        | 0        | 1.00E-04 | 0.001667 | 0        | 0.00197  |
| 1.52E-04 | 0        | 0        | 0        | 0        | 2.43E-04 | 0        | 3.20E-05 | 0        | 0        | 0        | 6.20E-05 | 0        | 0        | 0        |
| 0        | 0        | 0        | 0        | 0        | 0        | 0        | 0        | 0        | 0        | 0        | 0        | 0        | 0        | 0        |
| 0        | 0        | 0        | 0        | 5.10E-05 | 0        | 0        | 0        | 0        | 0        | 0        | 0        | 0        | 0        | 0        |
| 0        | 0        | 0        | 0        | 0        | 0        | 0        | 0        | 0        | 0        | 0        | 0        | 0        | 0        | 1.37E-04 |
| 0        | 0        | 0        | 0        | 0        | 0        | 0        | 0        | 0        | 0        | 0        | 0        | 0        | 0        | 0        |
| 3.70E-05 | 0        | 0        | 0        | 0        | 4.20E-05 | 0        | 0        | 0        | 0        | 0        | 0        | 5.00E-05 | 0        | 0        |
| 0        | 0        | 9.17E-04 | 5.03E-04 | 0        | 0        | 0        | 0        | 0        | 2.87E-04 | 0        | 0        | 0        | 4.00E-05 | 0        |
| 0        | 0        | 0        | 0        | 0        | 0        | 0        | 6.00E-05 | 3.50E-05 | 2.68E-04 | 0        | 0        | 0        | 0        | 0        |
| 0        | 0        | 0        | 0.012642 | 0        | 0        | 0        | 0        | 0        | 0        | 0        | 0        | 0        | 0        | 0        |
| 0.012893 | 0.009996 | 0.013976 | 0.020187 | 0.021142 | 0.003941 | 0.004001 | 0.007459 | 0.012316 | 0.021822 | 9.92E-04 | 0.008507 | 0.002872 | 0.007734 | 0.003403 |

Table S30. The abundance and composition at the phylum level of each sample among CP (n=36), SP (n=23), and HC (n=72) groups.

| ID                     | CP24     | CP05     | CP06     | CP23     | CP08     | CP15     | CP04     | CP35     | CP09     | CP12     | CP14     | CP18     |
|------------------------|----------|----------|----------|----------|----------|----------|----------|----------|----------|----------|----------|----------|
| Firmicutes             | 0.997829 | 0.992873 | 0.989415 | 0.983507 | 0.978695 | 0.976128 | 0.961634 | 0.950853 | 0.932169 | 0.908497 | 0.88891  | 0.855679 |
| Bacteroidetes          | 5.44E-04 | 0.004781 | 0.007433 | 1.04E-04 | 0.004243 | 1.78E-04 | 0.010855 | 0.038363 | 0.016957 | 0.077495 | 0.09165  | 0.131619 |
| Proteobacteria         | 4.15E-04 | 8.20E-04 | 6.70E-04 | 0.016231 | 0.012099 | 0.006101 | 0.008212 | 0.008047 | 0.013182 | 0.00906  | 6.93E-04 | 0.00941  |
| Verrucomicrobia        | 0        | 0        | 0        | 0        | 3.10E-05 | 4.50E-05 | 0.011336 | 4.30E-05 | 3.20E-05 | 0.00151  | 2.15E-04 | 2.80E-05 |
| Actinobacteria         | 8.91E-04 | 9.90E-04 | 0.002042 | 1.31E-04 | 0.004345 | 0.017548 | 0.007457 | 0.00203  | 0.037105 | 0.001551 | 0.016443 | 0.003066 |
| Bacteria_unclassified  | 0        | 2.80E-05 | 1.47E-04 | 0        | 5.30E-05 | 0        | 4.24E-04 | 4.80E-05 | 4.70E-05 | 0.001071 | 7.18E-04 | 7.90E-05 |
| Fusobacteria           | 1.46E-04 | 0        | 0        | 0        | 0        | 0        | 1.20E-05 | 2.20E-05 | 0        | 7.51E-04 | 0.001016 | 8.20E-05 |
| Cyanobacteria          | 1.75E-04 | 0        | 0        | 2.70E-05 | 1.80E-05 | 0        | 4.50E-05 | 0        | 0        | 0        | 0        | 3.70E-05 |
| Candidate_division_TM7 | 0        | 5.08E-04 | 2.93E-04 | 0        | 5.16E-04 | 0        | 2.50E-05 | 4.26E-04 | 5.08E-04 | 0        | 3.55E-04 | 0        |
| Tenericutes            | 0        | 0        | 0        | 0        | 0        | 0        | 0        | 0        | 0        | 0        | 0        | 0        |
| Synergistetes          | 0        | 0        | 0        | 0        | 0        | 0        | 0        | 1.68E-04 | 0        | 6.50E-05 | 0        | 0        |
| Lentisphaerae          | 0        | 0        | 0        | 0        | 0        | 0        | 0        | 0        | 0        | 0        | 0        | 0        |

| CP27     | CP30     | CP13     | CP20     | CP22     | CP33     | CP29     | CP28     | CP34     | CP10     | CP36     | CP02     | CP26     | CP19     | CP07     |
|----------|----------|----------|----------|----------|----------|----------|----------|----------|----------|----------|----------|----------|----------|----------|
| 0.816773 | 0.666519 | 0.660596 | 0.606162 | 0.555122 | 0.520917 | 0.502801 | 0.490382 | 0.443893 | 0.425654 | 0.408177 | 0.405121 | 0.31209  | 0.299927 | 0.295702 |
| 0.152363 | 0.004746 | 0.036495 | 0.354219 | 0.433062 | 0.372986 | 0.013577 | 0.008284 | 0.486438 | 0.261686 | 0.538992 | 9.40E-05 | 0.682984 | 0.018852 | 0.182313 |
| 0.012748 | 0.012664 | 0.301777 | 0.039038 | 0.009294 | 0.062168 | 0.014831 | 0.162201 | 0.065874 | 0.27932  | 0.049414 | 0.006692 | 0.00352  | 0.448392 | 0.517393 |
| 0.013109 | 8.90E-05 | 6.70E-05 | 0        | 0        | 0.030877 | 9.00E-05 | 2.40E-04 | 0        | 0        | 0        | 0        | 8.00E-05 | 0.23081  | 3.90E-05 |
| 0.001621 | 0.313434 | 9.48E-04 | 2.22E-04 | 0.00147  | 6.78E-04 | 0.456088 | 0.337184 | 0.001871 | 0.033109 | 0.002746 | 0.587975 | 2.43E-04 | 0.001813 | 2.72E-04 |
| 5.88E-04 | 1.39E-04 | 7.60E-05 | 1.99E-04 | 2.34E-04 | 7.46E-04 | 0        | 0        | 9.80E-04 | 2.31E-04 | 3.58E-04 | 3.40E-05 | 9.85E-04 | 0        | 1.40E-04 |
| 1.90E-05 | 3.37E-04 | 0        | 6.90E-05 | 6.97E-04 | 0.009975 | 6.28E-04 | 2.28E-04 | 8.31E-04 | 0        | 0        | 0        | 0        | 6.70E-05 | 0.003799 |
| 0        | 2.39E-04 | 0        | 0        | 0        | 0        | 4.47E-04 | 0.001481 | 2.10E-05 | 0        | 2.20E-05 | 3.00E-05 | 0        | 0        | 0        |
| 0.002779 | 0.001833 | 4.10E-05 | 9.10E-05 | 1.21E-04 | 4.64E-04 | 0.011538 | 0        | 9.20E-05 | 0        | 2.91E-04 | 5.40E-05 | 9.80E-05 | 1.13E-04 | 3.42E-04 |
| 0        | 0        | 0        | 0        | 0        | 0        | 0        | 0        | 0        | 0        | 0        | 0        | 0        | 0        | 0        |
| 0        | 0        | 0        | 0        | 0        | 0.001189 | 0        | 0        | 0        | 0        | 0        | 0        | 0        | 2.60E-05 | 0        |
| 0        | 0        | 0        | 0        | 0        | 0        | 0        | 0        | 0        | 0        | 0        | 0        | 0        | 0        | 0        |

| CP32     | CP01     | CP25     | CP16     | CP03     | CP11     | CP17     | CP21     | CP31     | SP03     | SP05     | SP20     | SP22     | SP21     | SP18     |
|----------|----------|----------|----------|----------|----------|----------|----------|----------|----------|----------|----------|----------|----------|----------|
| 0.232931 | 0.209967 | 0.160713 | 0.137203 | 0.135524 | 0.120813 | 0.085441 | 0.014363 | 0.006469 | 0.998308 | 0.998072 | 0.990329 | 0.986695 | 0.984321 | 0.971209 |
| 0.577536 | 0.057134 | 0.79557  | 0.061069 | 9.31E-04 | 0.001145 | 0.002325 | 0.003127 | 7.92E-04 | 8.13E-04 | 3.56E-04 | 5.40E-05 | 0.007897 | 0.002873 | 4.30E-04 |
| 0.125344 | 0.006764 | 0.011899 | 0.089405 | 0.856772 | 0.006182 | 0.005211 | 0.97917  | 0.992593 | 5.55E-04 | 0.001077 | 0.001094 | 0.001595 | 0.002285 | 0.008135 |
| 0        | 0.673565 | 0        | 0.709057 | 0.005649 | 0.870406 | 0.903709 | 0        | 0        | 0        | 0        | 0        | 0        | 0        | 0        |
| 0.004295 | 0.05254  | 0.001611 | 0.002237 | 2.56E-04 | 0.00142  | 0.00207  | 0.00276  | 1.46E-04 | 0        | 0        | 0.008475 | 0.002014 | 0.010153 | 0.019687 |
| 6.78E-04 | 3.00E-05 | 0.003591 | 0.001006 | 4.61E-04 | 0        | 0        | 0        | 0        | 4.30E-05 | 4.80E-05 | 0        | 1.31E-04 | 4.10E-05 | 3.19E-04 |
| 0.059216 | 0        | 0.026589 | 0        | 1.08E-04 | 3.40E-05 | 0        | 0        | 0        | 2.81E-04 | 0        | 0        | 0.001668 | 0        | 0        |
| 0        | 0        | 0        | 0        | 0        | 0        | 7.77E-04 | 0        | 0        | 0        | 2.50E-05 | 4.80E-05 | 0        | 2.40E-04 | 0        |
| 0        | 0        | 2.70E-05 | 2.30E-05 | 2.99E-04 | 0        | 4.67E-04 | 5.80E-04 | 0        | 0        | 2.20E-05 | 0        | 0        | 8.70E-05 | 2.20E-04 |
| 0        | 0        | 0        | 0        | 0        | 0        | 0        | 0        | 0        | 0        | 0        | 0        | 0        | 0        | 0        |
| 0        | 0        | 0        | 0        | 0        | 0        | 0        | 0        | 0        | 0        | 4.00E-04 | 0        | 0        | 0        | 0        |
| 0        | 0        | 0        | 0        | 0        | 0        | 0        | 0        | 0        | 0        | 0        | 0        | 0        | 0        | 0        |

| SP25     | SP09     | SP04     | SP13     | SP08     | SP14     | SP26     | SP10     | SP06     | SP02     | SP15     | SP27     | SP24     | SP16     | SP19     |
|----------|----------|----------|----------|----------|----------|----------|----------|----------|----------|----------|----------|----------|----------|----------|
| 0.969773 | 0.968593 | 0.961362 | 0.938803 | 0.917807 | 0.911453 | 0.879245 | 0.876321 | 0.871793 | 0.758761 | 0.739122 | 0.716794 | 0.651423 | 0.531128 | 0.52221  |
| 0.020009 | 0.015059 | 0.003413 | 0.006114 | 0.009513 | 0.012461 | 0.037275 | 0.014845 | 0.012859 | 0.030949 | 0.1725   | 0.036847 | 0.290162 | 0.437066 | 0.477332 |
| 0.003856 | 0.007746 | 0.007936 | 0.00409  | 0.068005 | 0.066093 | 0.078754 | 0.00318  | 0.111635 | 0.196474 | 0.005667 | 0.245689 | 0.050445 | 0.003736 | 2.93E-04 |
| 1.80E-05 | 0        | 0        | 0.045477 | 0        | 0        | 0        | 0        | 0        | 7.90E-04 | 0.021108 | 0        | 0.002696 | 3.10E-05 | 0        |
| 0.005084 | 0.00817  | 0.02682  | 0.00502  | 0.003672 | 0.002946 | 0.001148 | 0.104868 | 0.002705 | 0.009715 | 0.052983 | 5.54E-04 | 0.005213 | 0.027198 | 2.50E-05 |
| 7.10E-05 | 2.05E-04 | 0        | 1.92E-04 | 8.10E-05 | 5.51E-04 | 0        | 0        | 2.90E-05 | 6.06E-04 | 0.003782 | 4.10E-05 | 0        | 7.32E-04 | 0        |
| 0        | 0        | 0        | 3.30E-05 | 0        | 2.74E-04 | 0.00213  | 0        | 2.60E-05 | 0.001734 | 0        | 0        | 0        | 0        | 0        |
| 2.60E-05 | 0        | 1.70E-05 | 0        | 0        | 0        | 4.03E-04 | 0        | 0        | 0        | 0        | 3.90E-05 | 3.10E-05 | 0        | 0        |
| 0.001163 | 2.27E-04 | 4.52E-04 | 3.30E-05 | 9.22E-04 | 0.006222 | 0.001045 | 6.05E-04 | 8.93E-04 | 9.71E-04 | 2.80E-05 | 3.60E-05 | 3.00E-05 | 1.09E-04 | 1.40E-04 |
| 0        | 0        | 0        | 2.16E-04 | 0        | 0        | 0        | 0        | 0        | 0        | 0        | 0        | 0        | 0        | 0        |
| 0        | 0        | 0        | 2.20E-05 | 0        | 0        | 0        | 1.81E-04 | 6.00E-05 | 0        | 0.004615 | 0        | 0        | 0        | 0        |
| 0        | 0        | 0        | 0        | 0        | 0        | 0        | 0        | 0        | 0        | 1.95E-04 | 0        | 0        | 0        | 0        |

| SP23     | SP12     | HC44     | HC13     | HC68     | HC52     | HC45     | HC50     | HC41     | HC27     | HC46     | HC08     | HC11     | HC53     | HC06     |
|----------|----------|----------|----------|----------|----------|----------|----------|----------|----------|----------|----------|----------|----------|----------|
| 0.367098 | 0.136571 | 0.874827 | 0.864705 | 0.850781 | 0.839369 | 0.824767 | 0.819493 | 0.816453 | 0.802124 | 0.762366 | 0.75743  | 0.705085 | 0.699848 | 0.697759 |
| 0.570258 | 0.026833 | 0.060518 | 0.106943 | 0.083176 | 0.134386 | 0.160182 | 0.147722 | 0.177665 | 0.160365 | 0.211321 | 0.230517 | 0.283643 | 0.240684 | 0.263554 |
| 0.01563  | 0.810612 | 0.014585 | 0.009672 | 0.037819 | 0.019217 | 0.005464 | 0.023598 | 0.003042 | 0.016436 | 0.020432 | 0.005806 | 0.00385  | 0.019947 | 0.030373 |
| 9.10E-05 | 0        | 3.60E-05 | 0        | 0        | 0        | 0        | 2.71E-04 | 0        | 4.00E-05 | 0        | 0        | 0        | 0        | 6.24E-04 |
| 0.040486 | 0.02409  | 0.04652  | 0.013981 | 0.023328 | 0.005337 | 9.89E-04 | 4.42E-04 | 2.72E-04 | 0.018526 | 0.003347 | 0.004406 | 0.003053 | 0.035887 | 0.001298 |
| 6.20E-05 | 0.001666 | 0.003271 | 0.004604 | 0.004539 | 0.001134 | 0.003473 | 0.003093 | 0.002568 | 0.001306 | 0.001671 | 0.001734 | 0.004264 | 0.00361  | 0.006359 |
| 0        | 0        | 0        | 0        | 2.05E-04 | 5.34E-04 | 0.00504  | 7.60E-05 | 0        | 0        | 4.06E-04 | 0        | 0        | 0        | 0        |
| 2.90E-05 | 0        | 0        | 0        | 0        | 0        | 4.70E-05 | 3.23E-04 | 0        | 2.00E-05 | 3.88E-04 | 0        | 7.10E-05 | 0        | 0        |
| 0.006346 | 2.28E-04 | 2.43E-04 | 0        | 1.52E-04 | 0        | 3.80E-05 | 0        | 0        | 1.20E-05 | 6.90E-05 | 5.60E-05 | 3.40E-05 | 2.40E-05 | 3.30E-05 |
| 0        | 0        | 0        | 0        | 0        | 0        | 0        | 0.004982 | 0        | 0.001053 | 0        | 5.10E-05 | 0        | 0        | 0        |
| 0        | 0        | 0        | 9.50E-05 | 0        | 2.30E-05 | 0        | 0        | 0        | 1.18E-04 | 0        | 0        | 0        | 0        | 0        |
| 0        | 0        | 0        | 0        | 0        | 0        | 0        | 0        | 0        | 0        | 0        | 0        | 0        | 0        | 0        |

| HC24     | HC09     | HC15     | HC72     | HC58     | HC54     | HC28     | HC63     | HC35     | HC67     | HC62     | HC61     | HC18     | HC64     | HC65     |
|----------|----------|----------|----------|----------|----------|----------|----------|----------|----------|----------|----------|----------|----------|----------|
| 0.695185 | 0.690926 | 0.686494 | 0.682277 | 0.68     | 0.668454 | 0.668301 | 0.662395 | 0.655707 | 0.645495 | 0.64368  | 0.641625 | 0.641173 | 0.635829 | 0.627401 |
| 0.293798 | 0.296443 | 0.199723 | 0.300767 | 0.310936 | 0.315022 | 0.310252 | 0.329831 | 0.272181 | 0.32832  | 0.327335 | 0.347384 | 0.285263 | 0.334082 | 0.313399 |
| 0.003858 | 0.010457 | 0.004187 | 0.010358 | 0.005219 | 0.008342 | 0.00575  | 0.002751 | 0.067128 | 0.011559 | 0.016283 | 0.008675 | 0.042499 | 0.009113 | 0.032715 |
| 3.04E-04 | 4.30E-05 | 0        | 1.58E-04 | 0        | 4.08E-04 | 0        | 0        | 0        | 8.21E-04 | 0.00381  | 0        | 0        | 0        | 0        |
| 0.004166 | 7.31E-04 | 0.106487 | 0.003267 | 0.001797 | 0.002336 | 0.008227 | 0.003952 | 0.00321  | 0.007506 | 0.004513 | 0.001346 | 0.02976  | 0.013995 | 0.022357 |
| 0.002475 | 0.001357 | 0.002973 | 6.27E-04 | 0.001203 | 0.005036 | 0.007436 | 8.66E-04 | 0.001653 | 0.005786 | 0.001003 | 9.38E-04 | 6.54E-04 | 0.006981 | 0.002693 |
| 6.40E-05 | 4.30E-05 | 1.03E-04 | 0        | 5.45E-04 | 0        | 0        | 0        | 5.90E-05 | 5.20E-05 | 0        | 0        | 5.72E-04 | 0        | 1.97E-04 |
| 0        | 0        | 0        | 1.53E-04 | 0        | 0        | 0        | 0        | 0        | 7.20E-05 | 0        | 0        | 0        | 0        | 0        |
| 4.60E-05 | 0        | 3.30E-05 | 1.70E-05 | 0        | 1.24E-04 | 3.40E-05 | 0        | 6.20E-05 | 0        | 0        | 3.20E-05 | 0        | 0        | 2.70E-05 |
| 1.04E-04 | 0        | 0        | 0.001715 | 0        | 2.78E-04 | 0        | 0        | 0        | 3.89E-04 | 0.003282 | 0        | 0        | 0        | 0        |
| 0        | 0        | 0        | 6.61E-04 | 3.00E-04 | 0        | 0        | 2.05E-04 | 0        | 0        | 9.40E-05 | 0        | 7.90E-05 | 0        | 0.001211 |
| 0        | 0        | 0        | 0        | 0        | 0        | 0        | 0        | 0        | 0        | 0        | 0        | 0        | 0        | 0        |

| HC10     | HC14     | HC29     | HC34     | HC36     | HC49     | HC69     | HC03     | HC57     | HC71     | HC55     | HC47     | HC17     | HC40     | HC48     |
|----------|----------|----------|----------|----------|----------|----------|----------|----------|----------|----------|----------|----------|----------|----------|
| 0.626005 | 0.62459  | 0.612846 | 0.609555 | 0.601254 | 0.599994 | 0.599387 | 0.594634 | 0.587209 | 0.553138 | 0.549681 | 0.532171 | 0.530532 | 0.530021 | 0.529334 |
| 0.106074 | 0.370677 | 0.37037  | 0.362781 | 0.319785 | 0.382099 | 0.385169 | 0.3544   | 0.402316 | 0.418247 | 0.428618 | 0.330141 | 0.436172 | 0.465817 | 0.196442 |
| 0.022202 | 0.003252 | 0.00282  | 0.011092 | 0.00348  | 0.005694 | 0.007138 | 0.013972 | 0.007724 | 0.023168 | 0.014594 | 0.01834  | 0.022295 | 0.00128  | 0.268503 |
| 0        | 0        | 0        | 0        | 0        | 0        | 0        | 0        | 0        | 0        | 0        | 0        | 0        | 2.65E-04 | 0        |
| 0.245372 | 4.65E-04 | 0.00701  | 0.003423 | 0.07278  | 0.003228 | 0.001606 | 0.033903 | 1.44E-04 | 9.59E-04 | 7.14E-04 | 0.116154 | 0.008747 | 9.12E-04 | 6.90E-05 |
| 3.47E-04 | 9.42E-04 | 0.006919 | 0.006706 | 0.002701 | 0.008985 | 0.004106 | 0.002976 | 0.002535 | 0.003729 | 0.006393 | 0.003084 | 0.002084 | 0.001705 | 0.005287 |
| 0        | 4.10E-05 | 0        | 0.006443 | 0        | 0        | 0        | 0        | 3.50E-05 | 0        | 0        | 0        | 1.70E-04 | 0        | 3.46E-04 |
| 0        | 3.30E-05 | 3.50E-05 | 0        | 0        | 0        | 0.002239 | 0        | 0        | 0        | 0        | 0        | 0        | 0        | 0        |
| 0        | 0        | 0        | 0        | 0        | 0        | 0        | 1.15E-04 | 3.70E-05 | 4.60E-05 | 0        | 0        | 0        | 0        | 1.90E-05 |
| 0        | 0        | 0        | 0        | 0        | 0        | 2.51E-04 | 0        | 0        | 4.68E-04 | 0        | 1.10E-04 | 0        | 0        | 0        |
| 0        | 0        | 0        | 0        | 0        | 0        | 1.04E-04 | 0        | 0        | 2.45E-04 | 0        | 0        | 0        | 0        | 0        |
| 0        | 0        | 0        | 0        | 0        | 0        | 0        | 0        | 0        | 0        | 0        | 0        | 0        | 0        | 0        |

| HC43     | HC22     | HC60     | HC39     | HC51     | HC38     | HC19     | HC04     | HC25     | HC02     | HC30     | HC12     | HC01     | HC59     | HC16     |
|----------|----------|----------|----------|----------|----------|----------|----------|----------|----------|----------|----------|----------|----------|----------|
| 0.529049 | 0.515309 | 0.513667 | 0.453768 | 0.452681 | 0.443792 | 0.416334 | 0.398676 | 0.397619 | 0.395568 | 0.394137 | 0.392735 | 0.389358 | 0.386202 | 0.375598 |
| 0.439561 | 0.045464 | 0.453697 | 0.524846 | 0.529741 | 0.54206  | 0.30666  | 0.341783 | 0.593822 | 0.292206 | 0.565484 | 0.564318 | 0.590619 | 0.559826 | 0.585339 |
| 0.007292 | 0.42824  | 0.0263   | 0.010863 | 0.009492 | 0.002508 | 0.26596  | 0.254191 | 0.007174 | 0.299237 | 0.03309  | 0.005974 | 0.012813 | 0.003657 | 0.024661 |
| 0.001969 | 0        | 0        | 3.10E-05 | 0        | 3.00E-05 | 9.70E-05 | 0        | 0        | 0        | 0.001898 | 0.001095 | 0        | 0        | 0        |
| 0.002939 | 2.71E-04 | 0.002947 | 0.007011 | 0.003825 | 4.60E-04 | 0.005632 | 0.001369 | 3.05E-04 | 0.001005 | 0.003194 | 0.002061 | 8.83E-04 | 0.038418 | 0.009817 |
| 0.001329 | 0.010716 | 0.001096 | 0.002903 | 0.002199 | 0.009194 | 0.00474  | 0.003263 | 9.72E-04 | 0.011872 | 0.001394 | 0.001208 | 0.003162 | 4.30E-04 | 0.004456 |
| 0        | 0        | 0        | 0        | 0        | 0        | 0        | 9.10E-05 | 0        | 0        | 0        | 0        | 0.003129 | 0        | 1.29E-04 |
| 0.017861 | 0        | 0        | 0        | 0        | 0.001956 | 0        | 0        | 0        | 0        | 0        | 0.019883 | 0        | 0.011331 | 0        |
| 0        | 0        | 0        | 0        | 0        | 0        | 0        | 6.27E-04 | 0        | 3.00E-05 | 0        | 0        | 3.60E-05 | 0        | 0        |
| 0        | 0        | 0.001482 | 5.78E-04 | 0.002014 | 0        | 5.77E-04 | 0        | 1.08E-04 | 0        | 0        | 0.01268  | 0        | 1.36E-04 | 0        |
| 0        | 0        | 0        | 0        | 4.80E-05 | 0        | 0        | 0        | 0        | 8.20E-05 | 8.03E-04 | 0        | 0        | 0        | 0        |
| 0        | 0        | 8.11E-04 | 0        | 0        | 0        | 0        | 0        | 0        | 0        | 0        | 4.60E-05 | 0        | 0        | 0        |

| HC23     | HC56     | HC21     | HC66     | HC07     | HC33     | HC31     | HC32     | HC37     | HC05     | HC26     | HC20     | HC42     | HC70     |
|----------|----------|----------|----------|----------|----------|----------|----------|----------|----------|----------|----------|----------|----------|
| 0.370804 | 0.351259 | 0.346236 | 0.345523 | 0.344776 | 0.342368 | 0.324681 | 0.266592 | 0.26164  | 0.251723 | 0.234066 | 0.189498 | 0.14922  | 0.144314 |
| 0.610451 | 0.627293 | 0.582587 | 0.528122 | 0.623306 | 0.332617 | 0.651977 | 0.70249  | 0.724177 | 0.249858 | 0.719478 | 0.706609 | 0.83263  | 0.782005 |
| 0.017248 | 0.015382 | 0.014377 | 0.037532 | 0.020986 | 0.185606 | 0.017763 | 0.02799  | 0.008575 | 0.496733 | 0.038346 | 0.083137 | 0.015756 | 0.042559 |
| 0        | 0.001832 | 0        | 0.064035 | 0        | 2.20E-05 | 0        | 9.10E-05 | 6.55E-04 | 0        | 0        | 0.001704 | 0        | 0        |
| 3.10E-04 | 6.85E-04 | 0.047958 | 0.023434 | 0.008465 | 0.127543 | 0.002243 | 0.002382 | 9.30E-05 | 1.13E-04 | 0.005376 | 0.004539 | 0.001382 | 7.56E-04 |
| 0.001033 | 0.002279 | 0.008842 | 0.001206 | 0.002423 | 0.011844 | 0.002788 | 4.04E-04 | 0.004835 | 0.001367 | 0.002695 | 0.004241 | 1.74E-04 | 0.002071 |
| 4.00E-05 | 0.001006 | 0        | 7.60E-05 | 4.40E-05 | 0        | 5.48E-04 | 0        | 2.50E-05 | 1.59E-04 | 3.90E-05 | 0.010272 | 8.01E-04 | 0.028295 |
| 0        | 0        | 0        | 0        | 0        | 0        | 0        | 0        | 0        | 4.70E-05 | 0        | 0        | 0        | 0        |
| 0        | 3.20E-05 | 0        | 7.20E-05 | 0        | 0        | 0        | 0        | 0        | 0        | 0        | 0        | 0        | 0        |
| 3.10E-05 | 0        | 0        | 0        | 0        | 0        | 0        | 5.10E-05 | 0        | 0        | 0        | 0        | 3.70E-05 | 0        |
| 0        | 0        | 0        | 0        | 0        | 0        | 0        | 0        | 0        | 0        | 0        | 0        | 0        | 0        |
| 8.30E-05 | 2.32E-04 | 0        | 0        | 0        | 0        | 0        | 0        | 0        | 0        | 0        | 0        | 0        | 0        |

Table S31. The relative abundance and distribution of the key 51 OTUs among CP (n=36), SP (n=23), and HC (n=72) groups.

|                                                | CP01      | CP21      | CP22      | CP23      | CP24      | CP25      | CP26      | CP27      | CP28      |
|------------------------------------------------|-----------|-----------|-----------|-----------|-----------|-----------|-----------|-----------|-----------|
| OTU846 (Bifidobacterium)                       | 0.0006433 | 0         | 0         | 0         | 0         | 0.0018344 | 0         | 0         | 0.0001278 |
| OTU1548 (Ruminococcaceae_uncultured)           | 0         | 0         | 0         | 0         | 0         | 0.0011607 | 0.0009044 | 0         | 0         |
| OTU602 (Ruminococcaceae_uncultured)            | 0         | 0         | 0         | 0         | 0         | 0         | 0.0004409 | 0         | 0         |
| OTU1742 (Peptostreptococcaceae_Incertae_Sedis) | 3.62E-05  | 0         | 0.0122782 | 0         | 0         | 0         | 0         | 0.0001668 | 8.07E-05  |
| OTU974 (Clostridium_sensu_stricto_1)           | 0         | 0         | 0         | 0         | 0         | 0         | 0         | 0.0001734 | 0.0001345 |
| OTU734 (Bacteroides)                           | 0         | 0         | 0.0130698 | 0         | 0.0068709 | 0.0410704 | 0.0797849 | 0.0013279 | 0.0010626 |
| OTU958 (Parabacteroides)                       | 0.0005464 | 0         | 0.0008859 | 0         | 0         | 0.0189119 | 0         | 0.0019073 | 0         |
| OTU1079 (Bacteroides)                          | 0         | 0         | 6.67E-05  | 0         | 0         | 0.0033441 | 0.0008931 | 0.0055178 | 0         |
| OTU2162 (Bacteroides)                          | 0.0030135 | 0         | 0.0235509 | 0         | 0.0107707 | 0.1452968 | 0.3308518 | 0.0121198 | 0.0036182 |
| OTU524 (Bacteroides)                           | 0.0001188 | 0         | 0         | 0         | 0         | 0.0037418 | 0.015039  | 0.0001427 | 0         |
| OTU112 (Bacteroides)                           | 0.00492   | 0         | 0.0046596 | 0         | 0         | 0.0178648 | 0.083917  | 0.0023046 | 0.0002858 |
| OTU835 (Bacteroides)                           | 0.0033183 | 0         | 0.0011804 | 0         | 0         | 0.0104705 | 0.0093185 | 0.016358  | 0.0002118 |
| OTU940 (Lachnospiraceae_unclassified)          | 0         | 0         | 0         | 0         | 0         | 0         | 0.0003533 | 0         | 0         |
| OTU1512 (Lachnospiraceae_uncultured)           | 0         | 0         | 3.45E-05  | 0         | 0         | 0         | 0.0094174 | 5.49E-05  | 0.0003531 |
| OTU1372 (Lachnospiraceae_Incertae_Sedis)       | 0         | 0.0018851 | 0.0001381 | 0         | 0         | 0         | 0.0113393 | 0         | 5.72E-05  |
| OTU1893 (Lachnospiraceae_Incertae_Sedis)       | 0         | 0         | 0         | 0         | 0         | 0         | 0.0009214 | 0.0022299 | 0         |
| OTU798 (Faecalibacterium)                      | 0.0408638 | 0         | 0.42998   | 0.0021658 | 0         | 0.0565327 | 0.0733945 | 0.370913  | 0.0012576 |
| OTU639 (Faecalibacterium)                      | 0.0022346 | 0         | 0.0234428 | 0         | 0         | 0.0042856 | 0.0034538 | 0.1253328 | 0.0001177 |
| OTU1087 (Faecalibacterium)                     | 0.0002984 | 0         | 0.0009066 | 0         | 0         | 0.0006493 | 0.0032955 | 0.0127168 | 0         |
| OTU1944 (Lachnospiraceae_uncultured)           | 0         | 0         | 0.0022826 | 0         | 0         | 0         | 0.0013906 | 0.0037641 | 0         |
| OTU299 (Pseudobutyrvibrio)                     | 3.36E-05  | 0         | 0.0153593 | 0         | 0.0064995 | 0         | 0.1478997 | 0.1007904 | 0.0005952 |
| OTU1682 (Lachnospiraceae_unclassified)         | 0         | 0         | 0.0012241 | 0         | 0         | 0         | 0.0047907 | 0.0003512 | 5.04E-05  |
| OTU2145 (Lachnospira)                          | 0         | 0         | 0         | 0         | 0         | 0         | 0         | 0         | 0         |
| OTU1360 (Lachnospira)                          | 0         | 0         | 0         | 0         | 0         | 0         | 0         | 0         | 0         |
| OTU2135 (Lachnospiraceae_Incertae_Sedis)       | 0         | 0         | 4.37E-05  | 0         | 0         | 0         | 0         | 0         | 0         |
| OTU1966 (Roseburia)                            | 0         | 0         | 0.0001933 | 0.0010829 | 0         | 0.292087  | 0.0079844 | 0         | 0.0013047 |
| OTU63 (Anaerostipes)                           | 0.0009623 | 0         | 8.28E-05  | 0         | 0         | 0         | 0.0069076 | 0.0340965 | 0.0001681 |
| OTU324 (Erysipelotrichaceae_uncultured)        | 0         | 0         | 0         | 0         | 0         | 0         | 0         | 0         | 0         |
| OTU1431 (Lachnospiraceae_Incertae_Sedis)       | 0         | 0         | 0         | 0         | 0         | 0.0011769 | 0.0002148 | 0         | 0         |
| OTU530 (Blautia)                               | 0.0010075 | 0         | 0.0115511 | 0         | 0         | 0.0023863 | 0.0001639 | 0.0062333 | 0         |
| OTU213 (Blautia)                               | 0.0001227 | 0         | 0.0058561 | 0         | 0         | 0.0048375 | 0.0030327 | 0.0006036 | 9.75E-05  |
| OTU1377 (Akkermansia)                          | 0.8697425 | 0         | 0         | 0         | 0         | 0         | 0.0002261 | 0.0287718 | 0.000807  |
| OTU802 (Subdoligranulum)                       | 0.0505437 | 0         | 0.1272901 | 0.0036818 | 0         | 0.0365738 | 0.1256988 | 0.0830014 | 0.0014762 |
| OTU881 (Subdoligranulum)                       | 0.0024142 | 0         | 0.0073356 | 0         | 0         | 0.0016639 | 0.0069048 | 0.0029235 | 2.69E-05  |
| OTU619 (Subdoligranulum)                       | 0.0088287 | 0         | 0.2887825 | 0         | 0         | 0.3398456 | 0.0633044 | 0.1461265 | 0.0020276 |
| OTU1554 (Subdoligranulum)                      | 0.0002041 | 0         | 0.0100209 | 0         | 0         | 0.0097319 | 0.0013482 | 0.0046223 | 0.0001412 |
| OTU1127 (Subdoligranulum)                      | 0.0002506 | 0         | 0.0001588 | 0         | 0         | 0.0003734 | 0.00013   | 0.0001163 | 0         |
| OTU938 (Lachnospiraceae_Incertae_Sedis)        | 0.0004611 | 0         | 0.0007455 | 0         | 0         | 0.001599  | 0.0005257 | 0.0020039 | 0         |
| OTU1337 (Erysipelotrichaceae_Incertae_Sedis)   | 0.0013782 | 0.6242302 | 0.0021699 | 0         | 0         | 0.0019561 | 0.0018513 | 0.0112945 | 3.36E-05  |
| OTU610 (Erysipelotrichaceae_Incertae_Sedis)    | 0.0009571 | 0.0138871 | 5.06E-05  | 0         | 0.0057567 | 0.0012013 | 0         | 7.68E-05  | 0         |
| OTU283 (Veillonella)                           | 0.0065501 | 0.0206736 | 0.0008445 | 0.0530619 | 0.0063138 | 0         | 0.0013453 | 0.0013366 | 0.0148156 |
| OTU1891 (Candidate_division_TM7_norank)        | 0         | 0.0364459 | 0.0002278 | 0         | 0         | 0.0002192 | 0.000277  | 0.0010952 | 0         |
| OTU1358 (Gemella)                              | 0         | 0.0070378 | 0         | 0         | 0         | 0         | 7.91E-05  | 0         | 0         |
| OTU172 (Actinomyces)                           | 0         | 0.1058188 | 0         | 0         | 0.016156  | 0.0003166 | 0.0001046 | 0.0004038 | 0.1381759 |
| OTU1973 (Phyllobacteriaceae_unclassified)      | 0         | 0.0148297 | 0.0007018 | 0.0474308 | 0         | 0         | 0.0002798 | 0.0012686 | 0.016359  |
| OTU624 (Halomonas)                             | 0.0002764 | 0.1268694 | 0.0136796 | 0.6967892 | 0         | 0.0005519 | 0.001871  | 0.0171108 | 0.4644994 |
| OTU1482 (Pelagibacterium)                      | 4.13E-05  | 0.0167148 | 0.0009664 | 0.0921003 | 0         | 0         | 0.0001357 | 0.002096  | 0.0382395 |
| OTU2051 (Atopobium)                            | 0         | 0.0109338 | 0         | 0.0025989 | 0.0066852 | 0         | 0         | 0         | 0.0014022 |
| OTU295 (Solobacterium)                         | 4.39E-05  | 0.0103682 | 8.28E-05  | 0.0124533 | 0         | 0         | 0.0002091 | 0.000428  | 5.38E-05  |
| OTU315 (Streptococcus)                         | 6.85E-05  | 0.0103054 | 0.0001058 | 0.0873897 | 0.5389044 | 0.0003166 | 0         | 0.0002195 | 0.3124191 |
| OTU495 (Granulicatella)                        | 0.0001201 | 0         | 5.06E-05  | 0.0012453 | 0.4020427 | 0         | 0         | 0         | 0         |

| CP29      | CP31      | CP32      | CP33      | CP34      | CP35      | CP36      | CP20      | CP19      | CP30      | CP17      | CP18      | CP02      |
|-----------|-----------|-----------|-----------|-----------|-----------|-----------|-----------|-----------|-----------|-----------|-----------|-----------|
| 3.98E-05  | 0.0322581 | 0         | 0         | 0         | 0         | 0         | 0         | 0.000143  | 0         | 0         | 0         | 0         |
| 0         | 0         | 0         | 0         | 0         | 0.0011858 | 0         | 0         | 0         | 0         | 0         | 0         | 0         |
| 0         | 0         | 0         | 0         | 0         | 0.000108  | 0.0002428 | 4.59E-05  | 0         | 0         | 0         | 0         | 0         |
| 0.0003923 | 0         | 0         | 0.0005599 | 0.2854583 | 0.3634032 | 0         | 0         | 0         | 0         | 0         | 0         | 0.0025339 |
| 0         | 0         | 0         | 0         | 0         | 0.0026812 | 0         | 0         | 0         | 0         | 2.82E-05  | 8.84E-05  | 0.0006537 |
| 0.0001052 | 0.0276498 | 0.0001866 | 0.0238712 | 0.0047341 | 2.90E-05  | 0.0078494 | 0         | 3.63E-05  | 0.0002159 | 2.50E-05  | 0.0004289 | 0         |
| 0.0002786 | 0.0875576 | 9.69E-05  | 0.0163591 | 0.0206227 | 0.0008551 | 0.0068431 | 0         | 0.000143  | 0.0002531 | 0         | 0.0014516 | 0         |
| 0.0004093 | 0.0267281 | 0.0014816 | 0.0165427 | 0.0075421 | 9.49E-05  | 0.037509  | 0         | 0.0006305 | 0         | 0         | 0         | 0         |
| 0.0070093 | 0.2331797 | 0.0877253 | 0.3061772 | 0.3888681 | 0.002585  | 0.2625568 | 0.0001049 | 0.0002115 | 0.0011837 | 0         | 0.0010981 | 9.90E-05  |
| 0         | 0         | 0.0162299 | 0.0088022 | 0.0133275 | 0         | 0.007335  | 0.0015663 | 4.43E-05  | 0         | 0         | 0         | 0         |
| 0.0002331 | 0.0387097 | 0.0007462 | 0.019647  | 0.0062863 | 0.0010725 | 0.0015207 | 0.2346487 | 0.000143  | 0         | 0         | 0.000295  | 9.60E-05  |
| 0.0015434 | 0         | 0.6087966 | 0.0054874 | 0.0168269 | 0.00122   | 0.0828195 | 9.39E-05  | 0.0003989 | 9.31E-05  | 0         | 0.0001352 | 0         |
| 0         | 0         | 0         | 0.0003852 | 0         | 0         | 5.75E-05  | 0.0014155 | 0         | 0         | 0         | 0         | 0         |
| 0.0001791 | 0         | 0.1672855 | 0.0030102 | 0.1170196 | 0.0046865 | 0.0376304 | 0         | 0         | 0         | 0         | 0         | 0         |
| 0.0004178 | 0         | 0         | 0         | 0         | 0.0039236 | 0.0235482 | 0         | 0         | 0         | 0         | 0         | 0         |
| 0         | 0         | 0.0002009 | 0         | 0.0020319 | 0.0002714 | 0.0007252 | 0         | 0         | 0         | 0         | 0         | 0         |
| 0.0020863 | 0.0617512 | 0.0001794 | 0         | 0         | 0.0338029 | 0.0214205 | 0.7357933 | 0.0003868 | 0         | 0         | 0         | 0.0002849 |
| 3.41E-05  | 0         | 0         | 0         | 0         | 0.0028577 | 0.0002811 | 0.0027961 | 0         | 0         | 0         | 0         | 0         |
| 0         | 0         | 0         | 0         | 0         | 0.000776  | 0.0003322 | 0.0055332 | 0         | 0         | 0         | 0         | 0         |
| 7.96E-05  | 0         | 0         | 0         | 0         | 0.0018353 | 0.0064246 | 0.0085937 | 0         | 0         | 0         | 0         | 0         |
| 0.0013189 | 0.0562212 | 8.25E-05  | 0.0022487 | 0         | 0.0501457 | 0.0854775 | 5.24E-05  | 4.03E-05  | 0         | 1.74E-05  | 0         | 0.0004948 |
| 0.0001705 | 0         | 0         | 0         | 0         | 0.0007655 | 0.0023353 | 0         | 0         | 0         | 0         | 0         | 0         |
| 0         | 0.0875576 | 0         | 0.0001792 | 0         | 0.0434815 | 0         | 0         | 0         | 0         | 0         | 4.16E-05  | 0.0003868 |
| 0         | 0.0294931 | 0         | 0         | 0         | 0.0042056 | 0         | 0         | 0         | 0         | 0         | 0.0001559 | 0         |
| 0.0009721 | 0.0331797 | 0         | 0         | 0         | 0.0051147 | 0.0732578 | 0         | 0         | 0         | 0         | 4.42E-05  | 7.20E-05  |
| 0.0018504 | 0.0543779 | 0         | 0.0346085 | 0         | 0.0031463 | 0.1188143 | 0         | 0         | 0.0009157 | 0         | 0         | 0         |
| 0.001299  | 0         | 0.0286283 | 0         | 0         | 0.0013478 | 0.0711812 | 0         | 0         | 0         | 0         | 3.25E-05  | 9.60E-05  |
| 9.95E-05  | 0         | 0         | 0         | 0         | 0.009564  | 0.0106639 | 0         | 0         | 0         | 0         | 0         | 0         |
| 0         | 0         | 0.0026727 | 0.0133085 | 0.0206227 | 0.0008077 | 0.00192   | 0.000201  | 0         | 0         | 6.84E-05  | 0         | 0         |
| 0.000162  | 0.0580645 | 0.0080288 | 0.0075031 | 0.0355165 | 0.033065  | 0.0038145 | 0         | 2.62E-05  | 0         | 0.0023372 | 7.67E-05  | 0.0004108 |
| 0.0003041 | 0.0331797 | 0.0087392 | 0.003503  | 0.0385855 | 0.0032794 | 0.0037698 | 0.0034515 | 0         | 0         | 0.000216  | 0         | 0         |
| 0.0002558 | 0         | 0         | 0.138313  | 0         | 5.67E-05  | 0         | 0         | 0.4649528 | 0.0003313 | 0.9810394 | 3.64E-05  | 0         |
| 0.001876  | 0         | 0         | 0.1248701 | 0         | 0.2220928 | 0.0131718 | 0         | 0.4608433 | 7.44E-05  | 0.0030548 | 0.0876095 | 0.0013974 |
| 0.0001165 | 0         | 0         | 0.0046676 | 0         | 0.0100344 | 0.0008498 | 0.0009175 | 0.0327044 | 0         | 0.0001845 | 0.0039701 | 0.0001739 |
| 0.0040277 | 0         | 0.0002583 | 0.1966001 | 0.0001411 | 0.180668  | 0.0742897 | 6.33E-05  | 0.0001753 | 0.0011464 | 0.0001162 | 0.8554388 | 0.0009176 |
| 4.26E-05  | 0         | 0         | 0.0049588 | 0         | 0.0055284 | 0.0027794 | 0         | 0         | 7.82E-05  | 0         | 0.0274427 | 0         |
| 0         | 0         | 0         | 0.0080586 | 0         | 0.0003821 | 0.0002907 | 0         | 0.0003908 | 0         | 0         | 0.0008525 | 0         |
| 0         | 0         | 0         | 0.0177253 | 0         | 0.0001634 | 9.26E-05  | 0.0003779 | 0.0008763 | 0         | 0         | 0         | 0         |
| 0.0001222 | 0         | 0.0432905 | 0         | 0.0263446 | 0         | 0.0093413 | 0.0001748 | 0.01563   | 0         | 0.0064906 | 0         | 0         |
| 3.98E-05  | 0         | 0         | 0.000215  | 0.0042685 | 6.19E-05  | 0.0002268 | 0.0014767 | 0.0104892 | 0         | 0.0005851 | 0         | 0         |
| 0.0378635 | 0.0534562 | 0.0015103 | 0.0081347 | 0.0009948 | 0         | 0.0091976 | 9.61E-05  | 0.000133  | 0.0055424 | 0         | 2.99E-05  | 0.0199561 |
| 0.0311669 | 0         | 0         | 0.0004479 | 0.0006491 | 0.000527  | 0.0001438 | 0.0001595 | 9.06E-05  | 0.0052967 | 0.000507  | 0         | 0         |
| 0.0095391 | 0.0258065 | 0.0024287 | 0.0010885 | 0.0001905 | 0         | 0.0028465 | 4.15E-05  | 0.0017687 | 0         | 0.0010063 | 0.0001676 | 0         |
| 0.0789617 | 0         | 0.0002081 | 0.0004703 | 0.0018908 | 0.0001291 | 0         | 0         | 0.000133  | 0.5364481 | 0.0001314 | 9.62E-05  | 0.0127983 |
| 0.0043631 | 0         | 0.0013274 | 0         | 0.0001834 | 0.0002213 | 0.001067  | 0.0001966 | 0.0006204 | 0.002278  | 4.56E-05  | 0.0003132 | 0.0001709 |
| 0.0168526 | 0.0313364 | 0.0167501 | 0.0011423 | 0.0052915 | 0.0022991 | 0.0118843 | 0.0019857 | 0.0039362 | 0.0356143 | 0.0012462 | 0.0036673 | 0.0064021 |
| 0.0084078 | 0         | 0.002418  | 0         | 0.0003316 | 0.0003452 | 0.001313  | 4.59E-05  | 0.0010697 | 0.0046565 | 0.0001064 | 0.0004431 | 0.0004948 |
| 0.0188934 | 0         | 0.0001794 | 0.0006719 | 0.0003669 | 0.0001805 | 0         | 0         | 4.03E-05  | 0.1350537 | 0         | 7.80E-05  | 0.006636  |
| 0.0516548 | 0         | 0.0001686 | 0.0001971 | 0.0001623 | 0.0002714 | 0         | 0         | 0.0014363 | 0.0002531 | 0.0014406 | 4.16E-05  | 0.0006507 |
| 0.7163887 | 0.0294931 | 0.0002296 | 0.0295288 | 0.0015733 | 0.000664  | 0.0037186 | 0.0001245 | 0.0019459 | 0.2292709 | 0.0012571 | 0.0159273 | 0.9203045 |
| 0.0004434 | 0         | 0.0001507 | 0.0007167 | 0.0001693 | 6.32E-05  | 0.0004568 | 4.37E-05  | 0.00056   | 0.0412944 | 9.66E-05  | 3.77E-05  | 0.0249699 |

| CP03      | CP04      | CP06      | CP07      | CP08      | CP05      | CP10      | CP11      | CP12      | CP13      | CP14      | CP15      | CP09      |   |
|-----------|-----------|-----------|-----------|-----------|-----------|-----------|-----------|-----------|-----------|-----------|-----------|-----------|---|
| 0         | 0         | 0         | 0         | 0         | 0         | 0         | 0.021943  | 0         | 3.28E-05  | 0         | 0         | 0         | 0 |
| 0         | 0         | 0         | 0         | 0         | 0         | 0         | 0         | 0         | 0         | 0         | 0         | 0         | 0 |
| 0         | 0         | 0         | 0         | 0         | 0         | 0         | 0         | 0         | 0         | 0         | 0         | 0         | 0 |
| 0.0053829 | 0         | 0         | 0.0009464 | 0         | 0         | 0.0002459 | 0         | 0         | 0         | 0         | 0         | 0         | 0 |
| 0.6486998 | 2.25E-05  | 0         | 0         | 0         | 0         | 0         | 0         | 0         | 0         | 4.21E-05  | 0.7770678 | 0         | 0 |
| 0         | 0.0004222 | 0.0001335 | 0.004318  | 2.40E-05  | 0.0001507 | 0.0010507 | 0         | 0.0004421 | 0.003679  | 0.020706  | 0         | 8.17E-05  | 0 |
| 0         | 7.52E-05  | 0         | 0         | 0         | 7.70E-05  | 0.0146553 | 0         | 0.0004339 | 0.0006246 | 0.0016528 | 0.0002269 | 6.85E-05  | 0 |
| 0         | 8.42E-05  | 0         | 0.0005324 | 0.000123  | 0         | 0.0116501 | 0         | 0.0003202 | 0.0016449 | 0.0003894 | 0         | 0.0001686 | 0 |
| 0.0006953 | 0         | 0.0001064 | 0.0008281 | 0.0005542 | 0.0007888 | 0.0005142 | 3.51E-05  | 0.0027912 | 0.0034951 | 0.0008356 | 0         | 0.0005085 | 0 |
| 0         | 0         | 0         | 0         | 3.39E-05  | 0         | 0.0098905 | 0         | 0         | 6.42E-05  | 4.39E-05  | 0         | 0         | 0 |
| 0         | 0         | 0         | 0.0640009 | 0         | 0.0003538 | 0.1713218 | 0         | 0.0005688 | 0.0079184 | 0.017468  | 0.0001089 | 0.0002108 | 0 |
| 0         | 0.0001673 | 0         | 0.764551  | 0.0001739 | 0.0001015 | 0.3100533 | 0         | 0         | 0.0007743 | 0.0008429 | 0         | 0.0001528 | 0 |
| 0         | 0         | 0         | 0         | 0         | 0         | 0.0004311 | 0         | 0         | 7.49E-05  | 8.96E-05  | 0         | 0         | 0 |
| 0         | 0         | 0         | 0         | 0.0001315 | 0.0001443 | 0.0016702 | 0         | 9.97E-05  | 0         | 0.0091271 | 0         | 0.0016151 | 0 |
| 0         | 0         | 0         | 0         | 0         | 2.35E-05  | 0         | 0         | 0         | 0         | 0         | 0         | 0         | 0 |
| 0         | 0         | 0         | 0         | 2.69E-05  | 0         | 0         | 0         | 0         | 0         | 0         | 0         | 0         | 0 |
| 0.0008872 | 8.76E-05  | 0.0364067 | 0         | 0.0131201 | 0.0256798 | 0.3679526 | 0.0007761 | 0         | 0         | 0.0001042 | 0         | 0.0001291 | 0 |
| 0         | 0         | 8.03E-05  | 0         | 0.0029192 | 0.0020319 | 0.0557883 | 3.62E-05  | 0         | 0         | 0         | 0         | 0         | 0 |
| 0         | 0         | 4.80E-05  | 0         | 0.0018406 | 0.0001315 | 0.0117491 | 0         | 0         | 0         | 3.11E-05  | 0         | 0         | 0 |
| 0         | 0         | 0.0005495 | 0         | 6.64E-05  | 0         | 0         | 0         | 0         | 0         | 0.0044429 | 0         | 0         | 0 |
| 0         | 1.91E-05  | 0.0004744 | 0         | 0.1418133 | 0.0010635 | 9.90E-05  | 0         | 6.68E-05  | 0         | 0.1937189 | 0.0001724 | 0.0441915 | 0 |
| 0         | 0         | 0         | 0         | 0.0011422 | 0         | 0.0001756 | 0         | 0         | 0         | 0.0044795 | 0         | 0.0005427 | 0 |
| 0         | 0         | 0         | 0         | 0         | 0         | 0         | 0         | 1.64E-05  | 0         | 0.0103393 | 0         | 0         | 0 |
| 0         | 0         | 0         | 0         | 0         | 0         | 0         | 0         | 0         | 0         | 0.0017241 | 0         | 0         | 0 |
| 0         | 0         | 0         | 0         | 0.0002064 | 0         | 0         | 0         | 0         | 0         | 0         | 0         | 8.17E-05  | 0 |
| 0         | 0         | 0         | 0         | 8.34E-05  | 0         | 0         | 0         | 0.0002451 | 0         | 0.0125553 | 0         | 0         | 0 |
| 0         | 3.71E-05  | 0         | 0         | 0.5833404 | 5.99E-05  | 0         | 0.0001054 | 7.97E-05  | 6.84E-05  | 0.3412318 | 0         | 0.0130864 | 0 |
| 0         | 0         | 0         | 0         | 0         | 0         | 0         | 0         | 0         | 0         | 0         | 0         | 0.3491001 | 0 |
| 0.0003597 | 0         | 0         | 0         | 0.0002333 | 0         | 0.0027049 | 0         | 3.87E-05  | 0         | 0.0198431 | 0         | 0.0017547 | 0 |
| 0         | 0         | 8.97E-05  | 0.0010351 | 0.0036288 | 0         | 0         | 0.0011721 | 7.39E-05  | 0         | 0.0092405 | 0         | 0.0134158 | 0 |
| 0         | 0.0003604 | 0.0080994 | 0.0409026 | 0.1159689 | 0.0004404 | 0.0009676 | 0.0009613 | 9.38E-05  | 0         | 0.0108165 | 0         | 0.0844704 | 0 |
| 0.0677233 | 0.0127277 | 0         | 0.0011534 | 4.38E-05  | 0         | 0         | 0.9265465 | 0.0017709 | 0.0001433 | 0.0003931 | 0.0004084 | 8.43E-05  | 0 |
| 0.0017144 | 0.0350976 | 0.5940353 | 0         | 0.0180863 | 0.0199284 | 0.001485  | 0.0025976 | 0.0170803 | 0.0120638 | 0.0349032 | 0         | 0.4079562 | 0 |
| 0.0004915 | 0.0356422 | 0.0373264 | 0         | 0.000663  | 0         | 0.000182  | 0         | 3.99E-05  | 0         | 0.0019472 | 0         | 0.0173968 | 0 |
| 0.0033088 | 0.8665245 | 0.3089405 | 0         | 0.082881  | 0.9079968 | 0.002063  | 0.0647262 | 0.8004529 | 0.9100737 | 0.223585  | 0.0014341 | 0.0002029 | 0 |
| 0         | 0.0278794 | 0.0093882 | 0         | 0.0021176 | 0.0372778 | 0         | 0.0019397 | 0.0229384 | 0.0183673 | 0.0093008 | 0         | 0         | 0 |
| 0         | 0.0001886 | 0.0021031 | 0         | 3.39E-05  | 0.0004062 | 0         | 0         | 0.0006697 | 0.0170882 | 0.000682  | 0         | 0         | 0 |
| 0         | 0.0018964 | 0.0008393 | 0         | 0         | 0.0009106 | 0.0002778 | 0.0001352 | 0.0017955 | 0.0118007 | 0.0004242 | 0         | 6.32E-05  | 0 |
| 0         | 3.82E-05  | 0.0002377 | 0.0060334 | 0.0220134 | 0         | 0.0004663 | 0.000247  | 0.1409562 | 0.0081195 | 0.0525211 | 0         | 0.0208008 | 0 |
| 0         | 0.0045932 | 0         | 0.0114161 | 0.0010659 | 0.0010111 | 0.0081372 | 0.0006462 | 0         | 0.0012149 | 0.0002359 | 0         | 0.0091529 | 0 |
| 0.2598396 | 5.05E-05  | 0         | 0         | 3.53E-05  | 0         | 0.0004247 | 0         | 0.0001067 | 0         | 0.0029875 | 0.0036487 | 0.0001634 | 0 |
| 0.0030211 | 2.81E-05  | 0.0003055 | 0.0092571 | 0.0007294 | 0.000543  | 0         | 0         | 0         | 0         | 0.0005759 | 0         | 0.0012778 | 0 |
| 0         | 0.0002672 | 0         | 0.0009168 | 0.0007393 | 0         | 0         | 0         | 0         | 0         | 0.0024482 | 0.0172359 | 0.0001765 | 0 |
| 0         | 0.0024824 | 6.05E-05  | 0.0019815 | 0.0003407 | 4.28E-05  | 0         | 0         | 0.0015891 | 0         | 0.0002194 | 0.0056455 | 0.0002687 | 0 |
| 0         | 0.0004446 | 2.82E-05  | 0.0049982 | 0.0001767 | 5.13E-05  | 0.0002172 | 0         | 0.0004374 | 0.0002203 | 0         | 0.002614  | 0.0018943 | 0 |
| 0.0043039 | 0.0073923 | 0.0005808 | 0.0724299 | 0.0030591 | 0.000574  | 0.0034682 | 7.56E-05  | 0.00579   | 0.0024042 | 0.0007259 | 0.0450911 | 0.0257066 | 0 |
| 0.0004915 | 0.0008612 | 5.11E-05  | 0.006477  | 0.0002205 | 9.51E-05  | 0.0004152 | 0         | 0.0006075 | 7.49E-05  | 0.0001134 | 0.0048286 | 0.0024107 | 0 |
| 0.0005635 | 0.000366  | 0         | 0         | 0.0002446 | 2.46E-05  | 0         | 0         | 0         | 8.56E-05  | 0.0001737 | 0.0082141 | 0         | 0 |
| 0.002098  | 0.0007859 | 0         | 0.003342  | 0.0003817 | 0         | 0         | 0         | 0         | 0         | 0.0008465 | 0.0006989 | 0.0006639 | 0 |
| 0         | 0.0010891 | 0.0001011 | 0.0017745 | 0.001514  | 6.84E-05  | 0         | 0         | 0.0004621 | 0         | 0.0079058 | 0.0748432 | 0.0022026 | 0 |
| 0.0004196 | 0.0003694 | 1.46E-05  | 0.0031054 | 0.0002234 | 2.35E-05  | 0         | 0         | 0         | 0         | 0.0002871 | 0.0577616 | 0         | 0 |

| CP16      | SP02      | SP03      | SP04      | SP05      | SP06      | SP08      | SP09      | SP10      | SP12      | SP13      | SP14      | SP15      |           |
|-----------|-----------|-----------|-----------|-----------|-----------|-----------|-----------|-----------|-----------|-----------|-----------|-----------|-----------|
|           | 0         | 0.0121501 | 0         | 0         | 0         | 7.16E-05  | 0.0001772 | 0.0008479 | 0.0002704 | 0.056722  | 0.0019868 | 0.0002059 | 0.1153976 |
|           | 0         | 0.001478  | 0         | 0         | 0         | 0         | 5.37E-05  | 0.0001813 | 0         | 0         | 0.0002645 | 0.000175  | 0.0473136 |
|           | 0         | 0.0001638 | 0         | 0         | 0         | 0         | 0         | 0.0019734 | 0         | 0         | 0         | 0         | 0.0110345 |
|           | 0         | 0.0131959 | 0         | 5.19E-05  | 0         | 0         | 0         | 0.0173216 | 0         | 0         | 0         | 0.0257314 | 0.0817327 |
|           | 0         | 0.006557  | 0         | 0         | 0         | 0         | 0         | 0.0166563 | 0.0146028 | 0         | 0         | 0.0047198 | 0.0126206 |
| 0.008732  | 0.0002057 | 0         | 0         | 0         | 0.0068085 | 0.0078477 | 0         | 0.0068958 | 0         | 0         | 0         | 0         | 0.0129452 |
| 0.0006277 | 0.0002423 | 0         | 0.0002376 | 0         | 0         | 0         | 7.95E-05  | 0.0013183 | 0         | 0         | 0         | 0         | 0.002915  |
| 0.0026816 | 0.0001063 | 0         | 0         | 0         | 0         | 0         | 0.0009679 | 0.0008563 | 0         | 0.000296  | 0         | 0.0200536 |           |
| 0.0101818 | 0         | 0         | 0         | 0         | 0.0001894 | 0         | 0.0017949 | 0.0009239 | 0.0022405 | 0.0005861 | 9.27E-05  | 0.0883169 |           |
| 9.04E-05  | 0         | 0         | 0         | 0         | 0         | 0         | 7.39E-05  | 0.000293  | 0         | 0         | 0         | 0.0001048 |           |
| 0.0004284 | 0         | 0         | 0.0001278 | 0         | 0         | 0         | 0.0003375 | 0.0123831 | 0         | 0.0001002 | 0         | 0.0024957 |           |
| 0.0006091 | 0         | 0         | 4.19E-05  | 0         | 0         | 0         | 0.0035675 | 0.0037408 | 0         | 0.000162  | 0         | 0.003517  |           |
| 0         | 0         | 0         | 0         | 0         | 0         | 2.86E-05  | 3.63E-05  | 0         | 0         | 0         | 0         | 0.0001454 |           |
| 0.000229  | 0.0016192 | 0         | 0.0003713 | 0         | 8.05E-05  | 2.86E-05  | 0.0006736 | 0.0136113 | 0         | 4.19E-05  | 0.008585  | 0.0002435 |           |
| 0         | 0.0002248 | 0         | 0.0004531 | 0         | 0         | 0         | 0.0005788 | 0.000293  | 0         | 4.78E-05  | 0.0005986 | 0.0007541 |           |
| 0         | 9.41E-05  | 0         | 4.99E-05  | 0         | 0         | 0         | 0.0001144 | 0         | 0         | 0         | 0.0001941 | 0         |           |
| 0.0003491 | 0.2849977 | 2.47E-05  | 0.4422863 | 0         | 0.0439802 | 0.0776768 | 0.4666853 | 0.4271099 | 0         | 0.0576574 | 0.1949426 | 0.0498668 |           |
| 2.97E-05  | 0.0035208 | 0         | 0.0590801 | 0         | 0.0034915 | 0.0067719 | 0.0037516 | 0.0026479 | 0         | 0.0021173 | 0.006823  | 0.0007981 |           |
| 0         | 0.0011538 | 0         | 0.0126261 | 0         | 0.0001685 | 0.001688  | 0.0083777 | 0.0380282 | 0         | 0.0004358 | 0.0013928 | 0.0005614 |           |
| 2.10E-05  | 0.0002946 | 0         | 0.0002555 | 0         | 0         | 0         | 0.0003933 | 0         | 0         | 0.0001282 | 0.0043579 | 0.0012986 |           |
| 0.0236147 | 0.0084446 | 0         | 0.05492   | 0         | 0         | 0         | 0.0570887 | 0         | 0         | 0.0013051 | 0.0280303 | 0.0186941 |           |
| 0.0002129 | 9.41E-05  | 0         | 0.0006069 | 0         | 0         | 0         | 0.0024225 | 0         | 0         | 0         | 0.0007575 | 0.0004058 |           |
| 0         | 0         | 0         | 0         | 0         | 0         | 3.58E-05  | 0.0003556 | 0         | 0         | 0         | 0.0032093 | 0         |           |
| 5.70E-05  | 0         | 0         | 0         | 0         | 0         | 0         | 0.0002259 | 0         | 0         | 0         | 0.0005295 | 0.0003111 |           |
| 0         | 0.0039426 | 0         | 0.0099012 | 0         | 0         | 0         | 0.0139019 | 0         | 0         | 0.0005523 | 0.0041417 | 0.0081229 |           |
| 0         | 0.0275701 | 0         | 0.0009841 | 0         | 0         | 0         | 0.0084851 | 0         | 0         | 0.0011478 | 0.0003853 | 0.0087755 |           |
| 0.0017197 | 0.0026475 | 0         | 0.0419326 | 3.24E-05  | 0.0001775 | 0.0004887 | 0.0064572 | 0.0003493 | 0         | 0.0003298 | 0.0084379 | 0.0148559 |           |
| 0         | 0.0073553 | 0         | 0.0784893 | 0         | 0         | 0         | 0.0132534 | 0         | 0         | 0.0002517 | 0.0110133 | 0.0229957 |           |
| 0         | 0.005208  | 2.98E-05  | 0.0038807 | 0         | 0.0121629 | 0.00967   | 0.0029357 | 0.0128901 | 0         | 0.000113  | 9.85E-05  | 0.0112104 |           |
| 0.0554897 | 0.0055321 | 2.47E-05  | 0.0296459 | 0         | 0.0015601 | 0.0046274 | 0.0280688 | 0.0340958 | 0         | 0.0009532 | 0.2742503 | 0.0285315 |           |
| 0.0008642 | 0.0025499 | 0         | 0.0215791 | 0         | 0.0179975 | 0.0340759 | 0.0080848 | 0.0004507 | 0.0002839 | 0.0023305 | 0.0260285 | 0.0241353 |           |
| 0.8778522 | 0.0013769 | 0         | 0         | 0         | 0         | 0         | 0         | 0         | 0         | 0.0529928 | 0         | 0.0713812 |           |
| 0         | 0.2927381 | 0.0203859 | 0.2019315 | 0.4159907 | 0.7161554 | 0.6981231 | 0.0045256 | 0.0014535 | 0.0208437 | 0.1209581 | 0         | 0.3085476 |           |
| 0         | 0.0171036 | 0         | 0.0108934 | 0.0243308 | 0.0622715 | 0.0521754 | 0         | 0         | 0         | 0.003864  | 0         | 0.0192149 |           |
| 7.80E-05  | 0.1992321 | 0.9386479 | 0.006336  | 0.4665075 | 0.0018375 | 0.0044412 | 0.3193877 | 0.0016789 | 0         | 0.7296163 | 0.0001221 | 0.0010923 |           |
| 0         | 0.0051435 | 0.0333283 | 0         | 0.0165214 | 0         | 4.48E-05  | 0.0075479 | 0         | 0         | 0.0196895 | 0         | 0         |           |
| 0         | 0.0007268 | 0.0016674 | 0.0004811 | 0.0021017 | 8.05E-05  | 0.0006856 | 0.0010334 | 0         | 0.0002636 | 0.0012876 | 0         | 0.0041223 |           |
| 0         | 0.0001917 | 0         | 0.0039186 | 0         | 0.0001372 | 0.0002918 | 0.0003277 | 0.0159324 | 0         | 4.89E-05  | 0         | 0.0001082 |           |
| 0.0128696 | 4.53E-05  | 0.0052797 | 7.98E-05  | 0.0733883 | 0.048392  | 0.0488888 | 0.0001674 | 0.1125296 | 0.7965815 | 2.80E-05  | 0.3654627 | 0         |           |
| 0.0004296 | 0.0001098 | 0         | 0.001609  | 0         | 0.0285451 | 0.0432769 | 5.02E-05  | 0.108507  | 0.0643964 | 0         | 0.0140387 | 0.0004261 |           |
| 0         | 0.0876149 | 0         | 0         | 0         | 4.18E-05  | 0         | 0.0003919 | 0.0007211 | 0.0005677 | 1.75E-05  | 0         | 0         |           |
| 2.85E-05  | 0.0006815 | 0         | 0.0002276 | 0         | 0.0004102 | 0.0004708 | 0.0002078 | 0.0051606 | 0.0014497 | 3.85E-05  | 0.0066627 | 9.47E-05  |           |
| 4.46E-05  | 0.0002719 | 4.01E-05  | 0.0003613 | 0         | 0.000261  | 0.0003061 | 3.49E-05  | 0.0081577 | 0.0322084 | 8.16E-05  | 0.0001059 | 0         |           |
| 0.0006141 | 0.0002214 | 0         | 0.0007805 | 0         | 0.0004832 | 0.0004905 | 3.21E-05  | 0.0049352 | 0.0007299 | 3.15E-05  | 0.0018297 | 0.0001995 |           |
| 0.0001127 | 0.0001464 | 2.67E-05  | 0.000517  | 0.0001724 | 0.0018807 | 0.0006408 | 9.34E-05  | 0         | 0.0003346 | 0         | 0.0001868 | 0.0002942 |           |
| 0.0005955 | 0.0010771 | 0.0004348 | 0.012696  | 0.0007626 | 0.0487783 | 0.0054329 | 0.0001604 | 0.0042254 | 0.0038119 | 0.0004311 | 0.0040844 | 0.0036658 |           |
| 0.0001733 | 0.0001063 | 2.26E-05  | 0.001565  | 0.0001421 | 0.0026011 | 0.0002506 | 0         | 0.000507  | 0.001105  | 2.21E-05  | 0.0003809 | 0.0003754 |           |
| 0.0001349 | 3.83E-05  | 0         | 0         | 0         | 0.0003803 | 0.0002023 | 0         | 0.0003944 | 0.0005475 | 3.03E-05  | 0         | 9.13E-05  |           |
| 0.0001201 | 0.0002562 | 2.78E-05  | 9.78E-05  | 0         | 0.0005668 | 0.000716  | 0         | 0.0038986 | 0.0040552 | 0         | 0.0009457 | 0.0002333 |           |
| 0.0009706 | 0.0034354 | 5.96E-05  | 0.0006727 | 5.01E-05  | 0.0001417 | 0.0002148 | 0.000258  | 0.1369127 | 0.0138586 | 5.48E-05  | 0.0010634 | 0         |           |
| 3.84E-05  | 0.0001342 | 0         | 0.0003114 | 0         | 0.0003475 | 0.0001772 | 8.93E-05  | 0.0242254 | 0         | 0         | 0.0004162 | 0         |           |

| SP16      | SP18      | SP19      | SP20      | SP21      | SP22      | SP23      | SP24      | SP25      | SP26      | SP27      | HC36      | HC37      |           |
|-----------|-----------|-----------|-----------|-----------|-----------|-----------|-----------|-----------|-----------|-----------|-----------|-----------|-----------|
| 0.0179752 | 0.0014743 |           | 0         | 0         | 0         | 0         | 6.55E-05  | 0         | 0         | 0         | 0         | 0.0356715 | 0         |
| 0.0099127 | 0.000422  |           | 0         | 0.0004593 | 0         | 0         | 0         | 0         | 0         | 0         | 0         | 0         | 0         |
| 0.0111487 | 0         |           | 0         | 0         | 0         | 0         | 0         | 0         | 0         | 0         | 0         | 0.0013825 | 0.0099359 |
| 0.0017599 | 0.0098243 |           | 0         | 0         | 0         | 0         | 7.64E-05  | 0         | 0         | 0.0093869 | 0         | 0.0021536 | 0.001767  |
| 0         | 0.0484562 |           | 0         | 0.8762893 | 0         | 0         | 0.0001392 | 0.0002105 | 0         | 0         | 0         | 0         | 0.0001406 |
| 0.0006975 | 0         |           | 0         | 0         | 0.0002154 | 0         | 0.000606  | 0.2645636 | 0         | 0         | 0.001956  | 0.0355448 | 0.0075565 |
| 0.0067217 | 0         |           | 0         | 0         | 4.92E-05  | 0         | 0.0206327 | 0.0649304 | 0         | 0         | 0         | 0.0042052 | 0.0017737 |
| 0.0179788 | 0         |           | 0         | 0         | 0         | 0         | 0.0015369 | 0         | 0         | 0         | 0.002388  | 0.0858975 | 0.0091394 |
| 0.0295141 | 0.0001106 | 0.0002912 |           | 0         | 0.0001108 | 0         | 0.5568668 | 0.0007812 | 2.41E-05  | 0         | 0.0012606 | 0.0680328 | 0.1581575 |
| 0.0019153 | 0         |           | 0         | 0         | 0         | 0         | 0.0083617 | 0.0033906 | 0         | 0         | 0         | 0.0044999 | 0.0324882 |
| 0.0768227 | 0         |           | 0         | 0         | 0         | 0         | 0.252446  | 0.0019834 | 0         | 0.0003517 | 0.014831  | 0.014381  | 0.0181483 |
| 0.0162803 | 0         |           | 0         | 0         | 8.77E-05  | 0         | 0.0069121 | 0.0405039 | 0         | 0.0109257 | 0.0031366 | 0.0150447 | 0.2470818 |
| 0         | 0         |           | 0         | 0         | 0         | 0         | 0         | 0         | 0         | 0         | 0.0005563 | 0.0001487 | 0.0010307 |
| 0.0011239 | 0.0003704 |           | 0         | 0         | 0.0005125 | 0         | 0.0006961 | 0         | 0         | 0         | 0         | 0.0280955 | 0.0390106 |
| 0.0001301 | 0         |           | 0         | 0         | 0         | 0         | 0         | 0         | 0         | 0         | 0         | 0.0285499 | 0.035306  |
| 9.76E-05  | 0         |           | 0         | 0         | 0         | 0         | 0         | 0         | 0         | 0         | 0         | 0.0089502 | 0.0074561 |
| 0.0495962 | 0.167015  |           | 0         | 0.0002105 | 0         | 0         | 0.0032486 | 0         | 0.0906932 | 0         | 0.0001124 | 0.2530328 | 0.2929227 |
| 0.001731  | 0.000258  |           | 0         | 0         | 0         | 0         | 0.001193  | 0         | 6.89E-05  | 0         | 0         | 0.0139954 | 0.0324815 |
| 0.0003578 | 0.0065016 |           | 0         | 0         | 0         | 0         | 0.0002566 | 0         | 4.81E-05  | 0         | 0         | 0.0193187 | 0.0130783 |
| 0.0001265 | 0.0010246 |           | 0         | 0         | 0         | 0         | 9.01E-05  | 0         | 0.0027209 | 0         | 0         | 0.0085069 | 0         |
| 0.0010914 | 0.0036986 |           | 0         | 0         | 0.0123465 | 0         | 0.0001856 | 0         | 0         | 0         | 0         | 0.047103  | 0.0587452 |
| 0         | 0.0002801 |           | 0         | 0         | 0.0002185 | 0         | 0         | 0         | 0         | 0         | 0         | 0.0012971 | 0.0016197 |
| 0.0001301 | 0         |           | 0         | 0         | 0         | 0         | 0         | 0         | 0         | 0         | 0         | 0.0038582 | 0         |
| 0         | 0         |           | 0         | 0         | 0         | 0         | 0         | 0         | 0         | 0         | 0         | 0.0001707 | 0         |
| 0.0026634 | 0.064889  |           | 0         | 0         | 0         | 0         | 0         | 0         | 0         | 0         | 9.17E-05  | 0.0677381 | 0         |
| 0.0214047 | 0.0038663 |           | 0         | 0.0002679 | 0         | 0         | 9.28E-05  | 0         | 0         | 0         | 0         | 0.0030899 | 7.03E-05  |
| 0.0068627 | 0.1193456 | 4.92E-05  |           | 0         | 0.001482  | 0         | 9.83E-05  | 0         | 0         | 0         | 0.0001361 | 0.0862087 | 0.0006291 |
| 0.0079323 | 0.0128871 |           | 0         | 0         | 0.1022731 | 0         | 0.000243  | 0         | 5.91E-05  | 0         | 0         | 0.0054252 | 0.000261  |
| 0.0092659 | 0.0052061 |           | 0         | 0         | 0.0008433 | 0         | 0         | 0         | 0         | 0         | 0         | 0.0039161 | 0.0003514 |
| 0.0950473 | 0.3355724 | 5.51E-05  | 0.0002296 | 0.0026407 |           | 0         | 0.0002703 | 0         | 0.0003882 | 0.0015388 | 0         | 0.0966047 | 0.0206582 |
| 0.0208554 | 0.0068776 |           | 0         | 0         | 0.03585   | 0         | 0.0001638 | 0         | 0.004276  | 0.1568511 | 0         | 0.0125193 | 0.0001272 |
| 0.000112  | 0         |           | 0         | 0         | 0         | 0         | 0.0002484 | 0.0149362 | 1.97E-05  | 0         | 0         | 0         | 0.002192  |
| 0.0432575 | 0.1566894 | 0.9897639 | 0.000708  | 0.7963941 | 0.0113242 | 0.0010619 | 0.0056232 | 0.5099381 | 0.0024621 | 0.0104989 | 0.0385907 | 0.0039221 |           |
| 0.0008023 | 0.0084661 | 0.0064785 |           | 0         | 0.0393171 | 0         | 0         | 0.0155401 | 0.0302434 | 0         | 0         | 0.0012668 | 0         |
| 0.4352456 | 0.0427489 | 0.0001397 | 0.0008228 | 2.62E-05  | 0.626726  | 0.0323031 | 0.1163428 | 0.3444363 | 0.0388446 | 0.8653848 | 0.0040345 | 0.0006291 |           |
| 0.0182426 | 0.0014632 |           | 0         | 0         | 0.0253272 | 0.0005842 | 0.0048088 | 0.0089084 | 0.0005496 | 0.0207699 | 0         | 0         |           |
| 0.0044197 | 0.0001382 | 5.31E-05  |           | 0         | 5.08E-05  | 3.65E-05  | 7.37E-05  | 0         | 0.0016809 | 0         | 0.0361246 | 0.0001157 | 0         |
| 0.0038307 | 5.53E-05  |           | 0         | 0         | 0.00014   | 0         | 0.0002539 | 0         | 0.0009361 | 0         | 0.0343137 | 9.91E-05  | 5.35E-05  |
| 0.0789007 | 0.0002175 |           | 0         | 0         | 0.0032255 | 0.333113  | 0         | 0         | 0.0001105 | 0.0042428 | 0.0066609 | 0         | 0.0017335 |
| 0.0009685 | 0         |           | 0         | 0         | 0.0017543 | 0         | 0.0063006 | 0.0032022 | 0         | 0.6626217 | 0.0008463 | 0         | 0.0009672 |
| 0         | 5.53E-05  |           | 0         | 0.0130121 | 0         | 0         | 0.0001829 | 0.1481432 | 0         | 0         | 0         | 0.0001845 | 0.0004852 |
| 0.0003216 | 0.000105  | 0.0002754 |           | 0         | 0.0001339 | 0         | 0.0172258 | 0.0001662 | 0.0012719 | 0.022467  | 0         | 0         | 0         |
| 0.0003325 | 0.0002746 | 0.0010565 |           | 0         | 0.0003155 | 0         | 0.0017908 | 0.0054737 | 0         | 0.0009013 | 0         | 0.0001019 | 0         |
| 0.0008709 | 0         | 0         | 0.0070418 |           | 0         | 0.0019534 | 0.0097321 | 0.012072  | 0.000128  | 0.00787   | 0.0007102 | 0         | 0         |
| 0.0002385 | 0         | 0         | 0.0016648 | 2.62E-05  | 0.0001063 | 0.0012776 | 0.0102216 | 0.0002603 | 0.0076062 | 0.0001154 | 0         | 0         | 0         |
| 0.0017961 | 0.0012384 | 0.0002872 | 0.0107159 | 0.0011957 | 0.0010642 | 0.034891  | 0.2445859 | 0.002944  | 0.0313043 | 0.0001065 | 0         | 0         | 0         |
| 0.000253  | 0         | 0.0002302 | 0.0021623 | 3.54E-05  | 0.0003304 | 0.0032186 | 0.0086094 | 0.000514  | 0.0100024 |           | 0         | 0         | 0         |
| 0         | 0         | 4.92E-05  | 0.0099504 | 3.54E-05  |           | 0         | 0.0152302 | 0.0014349 | 0.0001662 | 0.0007474 | 0         | 0         | 8.03E-05  |
| 0.0007408 | 0         | 0.000244  |           | 0         | 0.0002632 | 0         | 0.0046845 | 0.0050914 | 6.12E-05  | 0.0196091 | 0         | 0         | 0         |
| 0.0001048 | 0.0004681 | 0.000964  | 0.0502497 | 0.0003801 | 1.88E-05  | 0.015667  | 0.0147478 | 0.0001028 | 0.0075623 |           | 0         | 0.0002644 | 0         |
| 0.0004192 | 0         | 6.30E-05  | 0.0262156 | 7.69E-05  |           | 0         | 0.001092  | 0.012637  | 0         | 0.0041549 | 0         | 0         | 0         |

| HC38      | HC39      | HC42      | HC41      | HC43      | HC35      | HC44      | HC40      | HC34      | HC26      | HC32      | HC31      | HC30      |
|-----------|-----------|-----------|-----------|-----------|-----------|-----------|-----------|-----------|-----------|-----------|-----------|-----------|
| 0.00024   | 0.0025796 | 0         | 0         | 0.0017544 | 0.0001424 | 0.0395427 | 0.0019525 | 0.0004913 | 9.31E-05  | 0.0020527 | 0.0009043 | 0.004158  |
| 0.0102223 | 0.0123599 | 0         | 0.0026508 | 0.0027272 | 0.006151  | 0.0006913 | 0.0012082 | 0         | 9.31E-05  | 0.0016555 | 0.0001739 | 0         |
| 0.0034421 | 0         | 0         | 0.0017975 | 0.0009318 | 0.0013983 | 0.0008108 | 0.002538  | 0         | 0         | 0.0013158 | 0         | 0.0080758 |
| 0.0083276 | 0.0037001 | 0.0752147 | 0.0036721 | 0.004181  | 0.076333  | 0.0004224 | 0.0022205 | 0.0017496 | 0.0005453 | 0.0060719 | 0.0003304 | 0.0035219 |
| 0.0087896 | 0         | 0.008415  | 0.0124668 | 0.0008061 | 0.2310253 | 0.1315404 | 0.004307  | 0.0002982 | 0.0009044 | 0.0040145 | 0.0001681 | 8.46E-05  |
| 0.001995  | 0.0067483 | 0.0199965 | 0.016249  | 0         | 0.0003572 | 0.0008094 | 0.0009626 | 0.0171864 | 0         | 0.0057322 | 0.0869299 | 0.0019848 |
| 0.0033024 | 0.0037906 | 0         | 0.0010488 | 0.0012844 | 0.0002614 | 0.0005188 | 0.0003151 | 0.0155587 | 0         | 0.001067  | 0.0091153 | 0.0065414 |
| 0.0004764 | 0.0150903 | 0.0029496 | 0.0357709 | 0.0032328 | 0.0002358 | 0.0015495 | 0.0003225 | 0.0187597 | 0         | 0.0024833 | 0.0601464 | 0.2530762 |
| 0.0132596 | 0.2112599 | 0.0011712 | 0.0393191 | 0.0571568 | 0.0038633 | 0.0283577 | 0.0002853 | 0.0083916 | 0.0001968 | 0.0377377 | 0.2592798 | 0.0429916 |
| 0.000265  | 0.013151  | 0         | 0.0020645 | 0.003517  | 0         | 0.0010674 | 0         | 0.01103   | 0         | 0.0002105 | 0.0653257 | 0.0078164 |
| 0.0030911 | 0.0239636 | 0         | 0.009805  | 0.0135514 | 0.0004319 | 3.94E-05  | 0.0012231 | 0.0157781 | 0.5852488 | 0.0011723 | 0.0168799 | 0.0837526 |
| 0.0030194 | 0.0080196 | 0.0044244 | 0.0063394 | 0.0214488 | 0.0007493 | 0.002033  | 0         | 0.0542107 | 0.0001889 | 0.0008613 | 0.0847388 | 0.04585   |
| 0.0003403 | 0.0002737 | 0         | 0.0005918 | 0.0006531 | 0.0001354 | 0.0001182 | 0.0006103 | 0.0003094 | 0         | 0.0004498 | 0.0008202 | 0         |
| 0.0030266 | 0.0084905 | 0.01002   | 0.002359  | 0.0038886 | 0.0012022 | 0.0070429 | 0.0048081 | 0.0105219 | 0.0001064 | 0.0094213 | 0.0018462 | 0.0048405 |
| 0.0094021 | 0.0100563 | 0.0232064 | 0.0190457 | 0.0097119 | 0.0055184 | 0.0049868 | 0.0136305 | 0         | 0         | 0.0115936 | 0.0156047 | 0.0053211 |
| 0.0013432 | 0.0007702 | 0.0041208 | 0.0006028 | 0.0002213 | 0.0003735 | 0.0004699 | 0         | 0.0052169 | 0         | 0.0001914 | 0.0020404 | 0.0005488 |
| 0.4854491 | 0.1959329 | 0.2622538 | 0.544139  | 0.5579889 | 0.3839551 | 0.4586742 | 0.8573038 | 0.629693  | 0.1428381 | 0.4115266 | 0.0496254 | 0.3371128 |
| 0.0164868 | 0.0135685 | 0.0137069 | 0.0383639 | 0.024463  | 0.0157335 | 0.0119414 | 0.0080657 | 0.0018302 | 0.0016865 | 0.0094213 | 0.0195174 | 0.0036338 |
| 0.0300903 | 0.0166933 | 0.0026026 | 0.0448988 | 0.0232223 | 0.0200053 | 0.0179074 | 0.02348   | 0.0105856 | 0.0030697 | 0.0141487 | 0.0091095 | 0.0034536 |
| 0.0070955 | 0.0211566 | 0         | 0.02661   | 0.0141225 | 0.003847  | 0.0067591 | 0.0019476 | 0         | 0         | 0.010005  | 0.0108659 | 0         |
| 0.2293682 | 0.2016327 | 0.1964952 | 0.0380391 | 0.0488849 | 0.0468876 | 0.0789903 | 0.0118442 | 0         | 0.0204906 | 0.0811598 | 0.043507  | 0.0297504 |
| 0.0149681 | 0.0114482 | 0.0032532 | 0.0188145 | 0.0128709 | 0.0032727 | 0.0014993 | 0.0019327 | 0         | 0.0009124 | 0.0464269 | 0.0049736 | 0.0003167 |
| 0.0194274 | 0.0543112 | 0.0050317 | 0.0155691 | 0.0171366 | 0.003177  | 0.0965486 | 0.0179127 | 0         | 0.0003032 | 0.1051461 | 0.0031215 | 0.0021077 |
| 0.0070023 | 0.0005405 | 0.1542899 | 0.0011286 | 0.0108979 | 0.0005229 | 0.0067889 | 0         | 0.0021584 | 0         | 0.0014737 | 0.0037012 | 0.0006116 |
| 0.0131629 | 0.0420836 | 0.0564761 | 0.0133036 | 0.0019457 | 0.0180211 | 0.0241042 | 0.0059593 | 0         | 0.1260903 | 0.0544367 | 0.0188334 | 0.0484874 |
| 0.0359894 | 0.0005428 | 0.0172204 | 0.0083984 | 0.0461741 | 0.0278907 | 0.0069872 | 0.0109659 | 0         | 0.0214748 | 0.0539439 | 0.0419129 | 0.0310281 |
| 0.0047207 | 0.0143016 | 0.0067667 | 0.0071212 | 0.0249439 | 0.027648  | 0.0114715 | 0.0071428 | 0.0358598 | 0         | 0.0170817 | 0.058274  | 0.0063558 |
| 0.0114401 | 0.0030227 | 0.0012579 | 0.0075698 | 0.0041018 | 0         | 0.0026306 | 0.0006426 | 0.0043524 | 0         | 0         | 0.0001681 | 0.0022906 |
| 0.0006662 | 0.0003897 | 0         | 0.0004762 | 0.0002186 | 0.0031934 | 4.07E-05  | 0.0002853 | 0.0003075 | 0         | 0.0001818 | 0.0173611 | 0.0099869 |
| 0.0336864 | 0.0631891 | 0.065455  | 0.0413588 | 0.0149532 | 0.0898395 | 0.0197951 | 0.0052969 | 0.1549775 | 0.0841196 | 0.050073  | 0.0849707 | 0.0221196 |
| 0.0053941 | 0.0065001 | 0.0186085 | 0.0277386 | 0.0059408 | 0.0107473 | 0.005769  | 0.0006227 | 5.25E-05  | 8.25E-05  | 0.0056317 | 0.013657  | 0.0021923 |
| 0.0001075 | 7.19E-05  | 0         | 0         | 0.0053806 | 0         | 4.89E-05  | 0.0006575 | 0         | 0         | 0.0004354 | 0         | 0.0051818 |
| 0.0039829 | 0.0118101 | 0.0422053 | 0.0068073 | 0.0431928 | 0.0096548 | 0.0065717 | 0.0034238 | 5.06E-05  | 0         | 0.0381492 | 0.0139584 | 0.0246996 |
| 0.0001397 | 0.0002273 | 0.0016049 | 8.53E-05  | 0.0007761 | 0.0001144 | 4.75E-05  | 0         | 0         | 0         | 0.0008613 | 0.0004666 | 0.0002239 |
| 0.0101865 | 0.0219801 | 0.0032532 | 0.0050704 | 0.0169863 | 0.0035459 | 0.0224066 | 0.0081327 | 0         | 0         | 0.0042489 | 0.0004348 | 0.0010866 |
| 0         | 0.0002041 | 0         | 0         | 0.0002241 | 0         | 0.0001725 | 0         | 0         | 0         | 0         | 0         | 0         |
| 0         | 0         | 0         | 0         | 0         | 0         | 0         | 0         | 0         | 0         | 0         | 0         | 0.0003003 |
| 0         | 0         | 0         | 0         | 0         | 0         | 0         | 0         | 0         | 0         | 0         | 0.0001478 | 0         |
| 0         | 0         | 0         | 9.08E-05  | 0         | 0         | 0         | 0         | 0.0002907 | 0.000931  | 0         | 0.0006173 | 8.19E-05  |
| 0         | 7.19E-05  | 0         | 0         | 0.0001093 | 0         | 0         | 0         | 0.0003394 | 0.0006969 | 0         | 0.0003101 | 0         |
| 0         | 0         | 0         | 0.0003854 | 0.000399  | 0.0010528 | 0.0005052 | 0         | 0         | 0.0099274 | 0.0073734 | 0         | 7.37E-05  |
| 0         | 0         | 0         | 0         | 0         | 0.0001447 | 0.000144  | 0         | 0         | 0         | 0         | 0         | 0         |
| 0         | 0         | 0         | 0         | 0         | 0.0001074 | 0         | 0         | 0         | 0         | 0         | 0         | 0         |
| 0         | 0         | 0         | 0         | 0         | 0         | 0.0001046 | 0         | 0         | 0         | 0         | 0         | 0         |
| 0         | 0         | 0         | 0         | 0         | 0         | 0         | 0         | 0         | 0         | 0         | 0         | 0         |
| 0         | 0         | 0         | 0         | 0         | 0         | 0         | 0         | 0         | 0         | 0         | 0         | 0         |
| 0         | 0         | 0         | 0         | 0         | 0         | 0         | 0         | 0         | 0         | 0.0002201 | 0         | 0         |
| 0         | 0         | 0         | 0         | 0         | 0         | 5.70E-05  | 0         | 0         | 0         | 0.0002392 | 0.0001623 | 0         |
| 0         | 6.73E-05  | 0         | 0.0001817 | 0         | 0.0024604 | 3.40E-05  | 0         | 0         | 0         | 0.0017847 | 0         | 0.0003413 |
| 9.31E-05  | 0         | 0         | 6.61E-05  | 0         | 0         | 0         | 0         | 0         | 0         | 0         | 0         | 0         |

| HC29      | HC28      | HC27      | HC25      | HC24      | HC23      | HC45      | HC33      | HC46      | HC64      | HC48      | HC70      | HC69      |
|-----------|-----------|-----------|-----------|-----------|-----------|-----------|-----------|-----------|-----------|-----------|-----------|-----------|
| 0.002055  | 0.0067719 | 0.0416654 | 0         | 0.0011802 | 0         | 0         | 0.1879891 | 0.0004    | 0.0213812 | 0         | 0         | 0         |
| 0         | 0.0013251 | 0.0171186 | 0.0014959 | 0.0225022 | 0.0020392 | 0         | 0         | 0         | 0         | 0         | 0         | 0.0113105 |
| 0.0009648 | 0         | 0.0050633 | 0.0042733 | 0.014289  | 0.0110891 | 0         | 0         | 0         | 0         | 0         | 0         | 0.0013711 |
| 0.0099767 | 9.74E-05  | 0.017063  | 0.0017148 | 0.0087265 | 0.0071301 | 0.0218358 | 0         | 0.0104685 | 0.0431288 | 0.0150818 | 9.74E-05  | 0.0008285 |
| 0.0002036 | 0.0039381 | 0.00331   | 0.0003192 | 0.0022595 | 0.0073068 | 0.0088004 | 0         | 0.0230865 | 0.0416631 | 0.0095256 | 0         | 0         |
| 0.0245125 | 0.021087  | 0.0262232 | 0.0016282 | 0.0074937 | 0.0023974 | 0.0059853 | 6.49E-05  | 0.0017946 | 0.0013555 | 0         | 0.0114147 | 0.0041187 |
| 0.0020801 | 0.0026178 | 0.0088565 | 0.0045014 | 0.0045105 | 0.0033239 | 0.000726  | 0.0172433 | 0.0006724 | 0.002279  | 5.05E-05  | 0.014314  | 0.003089  |
| 0.0004824 | 0.0257965 | 0.0147324 | 0.0022119 | 0.0211936 | 0.0016094 | 0.0003711 | 0         | 0.000372  | 0.004856  | 0         | 0.0124201 | 0.16978   |
| 0.1676445 | 0.0828915 | 0.0492005 | 0.02315   | 0.1659451 | 0.0162325 | 0.0834469 | 0.1696835 | 0.0643179 | 0.0316741 | 0         | 0.001967  | 0.0121602 |
| 0.0046817 | 0.0196304 | 0.0035922 | 0.001692  | 0.0071971 | 0         | 0.0047108 | 0.0446096 | 0.00167   | 0.0010427 | 0         | 0.0920964 | 0.0026549 |
| 0.0026796 | 0.016324  | 0.0044047 | 0.0056324 | 0.009871  | 0.002598  | 0.0107364 | 0.039578  | 0.0011331 | 0.0011172 | 0.0604355 | 0.2612814 | 0.0102756 |
| 0.0031146 | 0.0117477 | 0.0538405 | 0.0102569 | 0.002249  | 0         | 0.0572957 | 0.041192  | 0.0028343 | 0.0021241 | 0.0046811 | 0.3909179 | 0.0765586 |
| 9.20E-05  | 0.0002014 | 0         | 0.0011402 | 0.0004376 | 0.0024069 | 0.0020327 | 0         | 0.0005136 | 0.0004945 | 0         | 0.0001777 | 0.0002673 |
| 0.0005716 | 0.0029686 | 0.0017448 | 0.0112284 | 0.0046873 | 0.0093794 | 0.197522  | 0         | 0.0064732 | 0.0048679 | 6.25E-05  | 0.0094526 | 0.0068821 |
| 0.0092573 | 0.0059404 | 0.0075394 | 0.018904  | 0.0104369 | 0.0229614 | 0.0191819 | 0         | 0.0067829 | 0.0207943 | 0.0266222 | 0.0445462 | 0.0051404 |
| 0.001779  | 0.0007519 | 0.0010563 | 0.002408  | 0.0014116 | 0.0025741 | 0.0410015 | 0         | 0.0001043 | 0         | 0.0140312 | 0.0019548 | 0.002332  |
| 0.2848893 | 0.5161494 | 0.2830024 | 0.4146425 | 0.2612763 | 0.3964612 | 0.0923603 | 3.59E-05  | 0.3389718 | 0.1853314 | 0.3224597 | 0.0779991 | 0.0430293 |
| 0.0011711 | 0.0181915 | 0.0045501 | 0.0152007 | 0.0137756 | 0.0926765 | 0.013124  | 0         | 0.0103674 | 0.037251  | 0.0003823 | 0.0022493 | 0.0057757 |
| 0.0063379 | 0.0256227 | 0.0067525 | 0.0162269 | 0.0146003 | 0.0320543 | 0.0042026 | 0         | 0.0167067 | 0.0120565 | 0.0074652 | 0.0022469 | 0.0070966 |
| 0         | 0.0044707 | 0.0047725 | 0.0156978 | 0.0076431 | 0.0126603 | 0.0106396 | 0         | 0.0037619 | 0.0027408 | 0         | 0         | 0.0140528 |
| 0.0443488 | 0.0494689 | 0.11008   | 0.0513896 | 0.1334604 | 0.0994484 | 0.1176807 | 3.76E-05  | 0.0701203 | 0.0728962 | 0.0455196 | 0         | 0.0920408 |
| 0.0005521 | 0.0036344 | 0.0020313 | 0.0019428 | 0.0034481 | 0.0084673 | 0.0011616 | 0         | 0.0018444 | 0.0019007 | 0.00025   | 0         | 0.0072739 |
| 0.000421  | 0.0225583 | 0.0082792 | 0.011949  | 0.013479  | 0.0180998 | 0.0012503 | 0         | 0.0343426 | 0.2652971 | 0.3561721 | 9.01E-05  | 0.0001641 |
| 0.028748  | 0.0024327 | 0.0046913 | 0.0006431 | 0.0014769 | 0.0148762 | 0.0977809 | 0         | 0.0064109 | 0.0533293 | 0.0069266 | 0         | 0.0093041 |
| 0.047759  | 0.0206697 | 0.0344596 | 0.0806555 | 0.0658508 | 0.0650016 | 0.1211735 | 0         | 0.0347271 | 0.0222511 | 0.055865  | 0.0001095 | 0.2838119 |
| 0.1389634 | 0.0242521 | 0.008771  | 0.0948255 | 0.0641657 | 0.0108264 | 0.004864  | 4.27E-05  | 0.3102525 | 0.0998603 | 0.0292188 | 0.0170965 | 0.0656583 |
| 0.0584384 | 0.0094189 | 0.0014326 | 0.0229858 | 0.0097132 | 0.0025024 | 0.0094135 | 0         | 0.0064779 | 0.0119225 | 0.0283677 | 0.0117068 | 0.0030281 |
| 0.0139474 | 0.0037448 | 0.0020099 | 0.0114564 | 0.0290681 | 0.0020344 | 0.0032427 | 0         | 0.0053993 | 0.0004111 | 0         | 7.30E-05  | 0.0058048 |
| 0.0051055 | 0.0007438 | 0.0228961 | 0.003083  | 0.0030126 | 0.0019198 | 0.0018956 | 0         | 0.0012716 | 0.0005452 | 0.0002669 | 0.0021593 | 0.0051007 |
| 0.0605854 | 0.0531358 | 0.1109866 | 0.1002755 | 0.0725535 | 0.0808281 | 0.0330481 | 0.4777148 | 0.0241729 | 0.0470463 | 0.0162888 | 0.0369462 | 0.1117317 |
| 0.0017148 | 0.0024717 | 0.0211983 | 0.0227942 | 0.0082363 | 0.0150242 | 0.0107525 | 0.0049564 | 0.0015455 | 0.0006465 | 0         | 0.0076414 | 0.0095185 |
| 0         | 0         | 0.0001711 | 0         | 0.0006396 | 0         | 0         | 3.76E-05  | 0         | 0         | 0         | 0         | 0         |
| 0.0721069 | 0.0303679 | 0.0364439 | 0.0235285 | 0.0091178 | 0.0466821 | 0.0163667 | 0.0153629 | 0.0055113 | 0.0043019 | 0         | 0         | 0.0143069 |
| 0.0014667 | 0.0005083 | 0.0012102 | 0         | 0.000101  | 0.0005922 | 0         | 2.90E-05  | 3.58E-05  | 0.0001609 | 0         | 0         | 0.0005294 |
| 0.0023115 | 0.0096106 | 0.0795547 | 0.0221466 | 0.0029727 | 0.008601  | 0.0067274 | 0         | 0.0006039 | 0.0021599 | 0         | 0         | 0.0145055 |
| 0         | 0         | 0.0006757 | 0         | 0.0001073 | 0.0001958 | 0         | 0         | 0         | 0         | 0         | 0         | 9.00E-05  |
| 0         | 0         | 0         | 0         | 0         | 0         | 0         | 0         | 0         | 0         | 0         | 0         | 0         |
| 0         | 0         | 0         | 0         | 9.26E-05  | 0         | 0         | 0.0003382 | 0         | 0         | 0         | 0         | 0.0002621 |
| 0         | 5.52E-05  | 0         | 0         | 0         | 0         | 0         | 0.0002852 | 0         | 0         | 9.14E-05  | 0.0005964 | 8.21E-05  |
| 0.0003848 | 5.20E-05  | 0         | 0         | 0         | 0         | 0         | 0.0001947 | 2.80E-05  | 0         | 0         | 0.0002605 | 6.35E-05  |
| 0.0002872 | 0.0003037 | 0.0001026 | 0         | 0.0003682 | 0         | 0         | 3.42E-05  | 0.0024311 | 0.0021837 | 0.000125  | 0.000185  | 0         |
| 0         | 0         | 5.13E-05  | 0         | 9.68E-05  | 0         | 0.0003065 | 0         | 0.0001074 | 0         | 4.57E-05  | 0         | 0         |
| 0         | 0         | 0         | 0         | 0         | 0         | 0         | 0         | 2.96E-05  | 0         | 0         | 0         | 0         |
| 0         | 0         | 0         | 0         | 0         | 0         | 0         | 0         | 0         | 0.000146  | 0         | 0         | 0         |
| 0         | 0         | 0         | 0         | 0         | 0         | 0         | 0         | 0         | 0         | 0         | 0         | 0         |
| 0         | 0         | 0         | 0         | 0         | 0         | 0         | 0         | 0         | 0         | 0         | 0         | 0         |
| 0         | 0         | 0         | 0         | 0         | 0         | 0         | 0         | 0         | 0         | 0         | 0         | 0         |
| 0         | 0         | 0         | 0         | 0         | 0         | 0         | 0         | 0         | 0         | 0         | 0         | 0         |
| 0         | 0         | 0         | 0         | 0         | 0         | 0         | 0         | 2.49E-05  | 0.0001341 | 0         | 0         | 0         |
| 0         | 0         | 7.70E-05  | 0         | 0         | 0         | 0         | 0         | 3.11E-05  | 0.0002622 | 0         | 0         | 0         |
| 0.0003653 | 4.71E-05  | 0.0003892 | 0         | 0.0002567 | 0         | 0.000363  | 0.0005055 | 0.0041214 | 0.0003873 | 6.49E-05  | 0         | 0         |
| 0         | 0         | 0         | 0         | 9.68E-05  | 0         | 0         | 6.49E-05  | 7.94E-05  | 0         | 0         | 0         | 0         |

| HC68      | HC67      | HC66      | HC65      | HC22      | HC63      | HC62      | HC61      | HC47      | HC60      | HC58      | HC57      | HC56      |
|-----------|-----------|-----------|-----------|-----------|-----------|-----------|-----------|-----------|-----------|-----------|-----------|-----------|
| 0.035308  | 0.0106248 | 0.0383645 | 0.0573636 | 0         | 0.0019877 | 0.0055333 | 0.0002958 | 0.2873645 | 0.0024095 | 0.0005514 | 0         | 0.000405  |
| 0         | 0.0083217 | 0.0672555 | 0.0003726 | 0         | 0         | 0.0949628 | 0.078685  | 0.0137074 | 0.0039685 | 0.1317473 | 6.51E-05  | 0.0110584 |
| 0.0005111 | 0.0047547 | 0.0186965 | 0         | 0.0005736 | 0         | 0.0050142 | 0.0371133 | 0.0158135 | 0.0130637 | 0.0192928 | 0         | 0.0012    |
| 0.0161341 | 0.008747  | 0.0728513 | 0.0008473 | 0.0276394 | 0.0002439 | 0.0278441 | 0.0023233 | 0.0067199 | 0.0151573 | 0.0155434 | 0.0023639 | 0         |
| 0.0163263 | 0.0153193 | 0.0420681 | 0.0012395 | 0.0526681 | 0.0006874 | 0.011821  | 0.0003227 | 0         | 0.0442734 | 0.0219685 | 0.0008813 | 0         |
| 0.0012948 | 0.0035108 | 0.0045097 | 0.0173417 | 0.0003781 | 0         | 0.0095269 | 0.0043293 | 0.0979934 | 0.0079168 | 0.003082  | 0         | 0.0336326 |
| 0.0004795 | 0         | 0.015888  | 0.0096495 | 0         | 0         | 0.0078673 | 0.0053296 | 0.0156946 | 0.0057503 | 0.0149223 | 0.0053054 | 0.0061385 |
| 0.0011342 | 0.0004534 | 0.0343808 | 0.0259517 | 0.0001029 | 0         | 0.0791482 | 0.0054479 | 0.0311563 | 0.0010772 | 0.0024203 | 0.0270199 | 0.0758748 |
| 0.0860321 | 0.0203228 | 0.0192056 | 0.0307804 | 0.0008951 | 0         | 0.0111687 | 0.0326765 | 0.0323011 | 0.3267475 | 0.039938  | 0.4570669 | 0.2408128 |
| 0.0001679 | 0.0008627 | 0.0014339 | 0.0012435 | 0.0001878 | 0         | 0.0009451 | 0.0002904 | 0.0008821 | 0.0008504 | 0.0018051 | 0.0054296 | 0.0038436 |
| 9.01E-05  | 0.0004694 | 0.0083746 | 0.0167847 | 0.0213147 | 0.2982169 | 0.0030573 | 0.0048509 | 0.0067694 | 0.0098606 | 0.0087816 | 0         | 0.0214455 |
| 8.03E-05  | 0.0083859 | 0.0363663 | 0.0184871 | 0.001659  | 0.0001351 | 0.0139908 | 0.008352  | 0.0065266 | 0.0017413 | 0.0230829 | 0         | 0.0033224 |
| 0.0004138 | 0.0002207 | 0.0001527 | 0.0002275 | 0.0002598 | 0.0001371 | 0.0004127 | 0.0011778 | 0         | 0.0001741 | 0.0011318 | 0         | 0.0016049 |
| 0.00966   | 0.0025599 | 0.0103898 | 0.0088022 | 0.0031842 | 0.0024574 | 0.0087415 | 0.005464  | 0.0119927 | 0.0048189 | 0.007081  | 0.026109  | 0.0006712 |
| 0.009677  | 0.0088955 | 0.0012091 | 0.0076725 | 0.012207  | 0.0209916 | 0.0178069 | 0.0104924 | 0         | 0.0040252 | 0.0036682 | 0.0939791 | 0         |
| 0.002042  | 0.0006781 | 0         | 0.000761  | 0.0004553 | 0.0016772 | 0.000599  | 0.0020382 | 0         | 0.0001215 | 0.0019908 | 0.0029021 | 0         |
| 0.2755251 | 0.281104  | 0.1018569 | 0.3954655 | 0.1616464 | 0.2983601 | 0.2147966 | 0.252447  | 0.058695  | 0.2514143 | 0.1361236 | 0.267214  | 0.3440355 |
| 0.0134179 | 0.010043  | 0.0066267 | 0.0133485 | 0.0005118 | 0.0262672 | 0.0066382 | 0.0246096 | 0.0009218 | 0.0056936 | 0.0216029 | 0.0035941 | 0.0336626 |
| 0.0153698 | 0.0169925 | 0.0013364 | 0.017275  | 0.0050798 | 0.0165143 | 0.0157258 | 0.0158542 | 0.0015016 | 0.0051591 | 0.0109756 | 0.0042644 | 0.0186743 |
| 0.0020444 | 0.0179996 | 0         | 0.003801  | 0.0185729 | 0.0251    | 0.0099263 | 0.0037377 | 0.0005848 | 0.0070502 | 0.005984  | 0.0132625 | 0         |
| 0.2344805 | 0.2208981 | 0.0074031 | 0.0330947 | 0.1158663 | 0.0404189 | 0.1746168 | 0.335472  | 0.008494  | 0.0672665 | 0.0746349 | 0         | 0.0531994 |
| 0.0219461 | 0.0220922 | 0         | 0.0017573 | 0.0031508 | 0.0021671 | 0.0050053 | 0.0051521 | 0.0002924 | 0.0029116 | 0.0005572 | 0         | 0.0065998 |
| 0.0216151 | 0.0334673 | 0.0060709 | 0.0003923 | 0.0970285 | 0.0300572 | 0.0436941 | 0.040695  | 0         | 0.0186804 | 0.0274418 | 0.0001577 | 0.0120933 |
| 0.0100251 | 0.0218114 | 0.0019685 | 0.0005256 | 0.0329507 | 0.0066081 | 0.0237041 | 0.004695  | 0.0001834 | 0.0036243 | 0.0065935 | 0.0172391 | 0.0078297 |
| 0.0941222 | 0.1109747 | 0.071358  | 0.044223  | 0.1586886 | 0.0624104 | 0.0264419 | 0.0149454 | 0.0305468 | 0.0136833 | 0.0180449 | 0.0001321 | 0.0282103 |
| 0.0087814 | 0.0464514 | 0.002694  | 0.0117716 | 0.1048939 | 0.048158  | 0.0336747 | 0.0064482 | 0.0003568 | 0.0211506 | 0.2381712 | 0         | 0.000435  |
| 0.0063426 | 0.0240302 | 0.0114928 | 0.0027889 | 0.0017078 | 0.0123958 | 0.0035632 | 0.0050176 | 0.153051  | 0.0228433 | 0.0074525 | 0         | 0.0027862 |
| 0.0048312 | 0.0086467 | 0         | 0.0180556 | 0.0168753 | 0.0219089 | 0.0002973 | 0.003173  | 0.0234056 | 0.00262   | 0.0089267 | 0         | 0.0028237 |
| 0.002519  | 0.0012278 | 0.025531  | 0.068845  | 0.0007588 | 0.0037395 | 0.0016596 | 0.0011832 | 0.0089351 | 0.0014943 | 0.0091415 | 0.0006329 | 0.0059473 |
| 0.0933239 | 0.0462308 | 0.0473881 | 0.0699982 | 0.1236211 | 0.0693492 | 0.0296501 | 0.0570709 | 0.0484764 | 0.0932847 | 0.0577682 | 0.04003   | 0.0372587 |
| 0.0051525 | 0.0083418 | 0.0133043 | 0.0498205 | 0.0159751 | 0.0092953 | 0.0087371 | 0.0067117 | 0.0151693 | 0.01374   | 0.042457  | 0.0019597 | 0.0093259 |
| 0         | 0         | 0.2713724 | 0         | 0         | 0         | 0.0169061 | 0         | 0         | 0         | 0         | 0         | 0.0068698 |
| 0.0023195 | 0.0081572 | 0.0471845 | 0.0293997 | 0.0202524 | 0         | 0.0355295 | 0.0072764 | 0.0341148 | 0.0208267 | 0.0067966 | 0.0258192 | 0.013117  |
| 0         | 0.0002488 | 0.0003649 | 0.0007727 | 0.0002135 | 0.0002117 | 0.0006745 | 0         | 0.0005947 | 0.0005467 | 0.0003134 | 0.0006171 | 0.0001087 |
| 0.0043128 | 0.0267426 | 0.0110685 | 0.0393669 | 0.0002984 | 0         | 0.0491343 | 0.0155154 | 0.0816496 | 0.0041062 | 0.028295  | 0.0020681 | 0.0167732 |
| 0         | 0         | 0         | 0.000506  | 0         | 0         | 0.0003505 | 0.0004625 | 0.0016304 | 0         | 0         | 0         | 0         |
| 0         | 0         | 0.0003649 | 7.45E-05  | 0         | 0         | 0.0001065 | 0         | 0.0007731 | 0         | 0         | 0         | 0         |
| 0         | 0         | 0.000157  | 0.0002903 | 9.52E-05  | 0         | 0.0004393 | 0         | 0.0001586 | 0         | 0.0002264 | 0.0004061 | 0         |
| 0         | 0         | 0.0004539 | 0         | 0.0001132 | 0         | 0.000142  | 0         | 0.0013331 | 0         | 0         | 5.72E-05  | 0         |
| 9.49E-05  | 0         | 0.000297  | 0.0006629 | 0         | 0.0001351 | 0         | 0         | 0.0009862 | 0.0005143 | 0         | 0.0002484 | 0         |
| 0.0035121 | 0.0004133 | 0         | 0.0001216 | 8.49E-05  | 0.0003689 | 0         | 0         | 0         | 0.0005183 | 0.0005688 | 0.0010528 | 0         |
| 0.0003699 | 0         | 0.0003055 | 0         | 0         | 0         | 0         | 0.0001721 | 0         | 0         | 0         | 0         | 0.00012   |
| 0.0001947 | 0         | 0         | 0         | 0         | 0         | 0         | 0         | 0         | 0         | 0         | 0         | 0         |
| 0.0001874 | 0         | 0.0002545 | 0         | 9.00E-05  | 0         | 0         | 0         | 0.0008871 | 0         | 0         | 6.31E-05  | 0         |
| 0         | 0         | 0         | 0         | 0         | 0         | 0         | 0         | 0         | 0         | 0         | 0         | 0         |
| 0         | 0         | 0         | 0         | 0         | 0         | 0         | 0         | 0         | 0         | 0         | 0         | 0         |
| 0         | 0         | 0         | 0         | 0         | 0         | 0         | 0         | 0         | 0         | 0         | 0         | 0         |
| 0         | 0         | 0         | 0         | 0         | 0         | 0         | 0         | 0         | 0         | 0         | 0         | 0         |
| 9.01E-05  | 0         | 0         | 0         | 0         | 0         | 0         | 0         | 0         | 0         | 0         | 0         | 0         |
| 7.06E-05  | 0         | 0         | 0         | 0         | 0         | 0.0001464 | 0.0001721 | 0.000337  | 0.0009152 | 0.000621  | 5.91E-05  | 0.00012   |
| 0         | 0         | 0         | 0.0001177 | 0         | 0         | 0         | 0         | 0         | 0         | 0.000296  | 0         | 0         |

| HC55      | HC54      | HC53      | HC52      | HC51      | HC50      | HC49      | HC59      | HC21      | HC03      | HC19      | HC20      | HC01      |           |
|-----------|-----------|-----------|-----------|-----------|-----------|-----------|-----------|-----------|-----------|-----------|-----------|-----------|-----------|
|           | 0         | 0.0014609 | 0.026561  | 0.0016546 | 0.0005423 | 0.0004033 | 0.0013373 | 0.0978996 | 0.0223576 | 0.0113865 | 0.0017114 | 0.0043208 | 0.0001148 |
|           | 0         | 0.0561027 | 0.0044681 | 0.0062094 | 0         | 0.0124932 | 0.0023334 | 0.0038643 | 0.0029337 | 0         | 0.0357943 | 0         | 0         |
| 4.41E-05  | 0.0038204 | 0.0005241 | 0.000405  | 0         | 0.0222931 | 0         | 0.0021484 | 0.0026009 | 0         | 0.0051898 | 0         | 0         | 0         |
|           | 0         | 0.0197102 | 0.008404  | 0.00691   | 0.0024752 | 0.0241196 | 0.005472  | 0.0656974 | 0.0121596 | 0.0128621 | 0.002798  | 0.0005687 | 0.0005799 |
| 0.0005831 | 0.00104   | 0.0010758 | 0.003265  | 0.0007236 | 0.0083814 | 0.0096831 | 0.0019725 | 0.0064805 | 0.0063379 | 0.0050544 | 0         | 6.12E-05  | 0         |
| 0.002807  | 0.0003325 | 0.0098469 | 4.80E-05  | 7.09E-05  | 0.0027675 | 0.0058158 | 0.0115215 | 0.003319  | 0         | 0.1055255 | 0.0606544 | 0         | 0         |
| 0.0032262 | 0.0049629 | 0.0041203 | 0.0056719 | 0         | 0.0051781 | 0.0011326 | 0.0070346 | 0.0080612 | 0         | 0.0110462 | 0.0238941 | 0.0098618 | 0         |
| 0.0035603 | 0.0016237 | 0.012047  | 0.0096855 | 0.0090558 | 0.0003987 | 0.0952886 | 0.0009744 | 0.0005867 | 0.0819896 | 0.0072797 | 0.009647  | 0.0069285 | 0         |
| 0.3399386 | 0.0094271 | 0.1284665 | 0.0334769 | 0.5211109 | 0.0016549 | 0.0133238 | 0.0072105 | 0.1355379 | 0.000234  | 0.0877343 | 0.2472481 | 0.4170306 | 0         |
| 0.0136046 | 0.0003007 | 0.0058415 | 0.0040443 | 0.0155685 | 0.000445  | 0.0007887 | 0         | 0.0039277 | 0.0024377 | 0.0061341 | 0.0089463 | 0.0601671 | 0         |
| 0.0018676 | 0.0032402 | 0.0015126 | 0.0057967 | 0.011676  | 0.0023318 | 0.0022461 | 0.0008318 | 0.0043918 | 0.0110702 | 0.0130249 | 0.0048946 | 0.0182318 | 0         |
| 0.0068701 | 0.0034383 | 0.0025964 | 0.0535139 | 0.0011288 | 0.0012053 | 0.0098905 | 0.0015067 | 0.0158377 | 0.0009296 | 0.0315625 | 0.045864  | 0.0238918 | 0         |
| 0.0003578 | 0.0011213 | 0.0001585 | 0.0001324 | 0         | 0.0004126 | 0.0002238 | 0.0006512 | 0.0007838 | 0.0001365 | 0.0008609 | 0.0002742 | 0.0002647 | 0         |
| 0.0091396 | 0.0081961 | 0.0022874 | 0.0200773 | 0.0049961 | 0.0040006 | 0.0063726 | 0.0032749 | 0.0196121 | 0.002247  | 0.00243   | 0.009383  | 0.0080914 | 0         |
| 0.0064839 | 0.0043262 | 0.0035428 | 0.0039675 | 0.001586  | 0.0004265 | 0.0011326 | 0.0079234 | 0.0229969 | 0.0001387 | 0.0142712 | 0.03117   | 0.0085    | 0         |
| 0.0025595 | 0.0007535 | 0.0004853 | 0.0042976 | 0.0002365 | 0         | 0.0008733 | 0.0002234 | 0.0098389 | 0.0002643 | 0.0018052 | 0.0020513 | 0.0007345 | 0         |
| 0.1853659 | 0.1644134 | 0.4311239 | 0.3959531 | 0.2074041 | 0.5334443 | 0.3497692 | 0.3133909 | 0.1732865 | 0.3279539 | 0.2346674 | 0.089306  | 0.2144615 | 0         |
| 0.0352251 | 0.002837  | 0.0648035 | 0.0097987 | 0.0090479 | 0.0125859 | 0.0381973 | 0.0115738 | 0.0117042 | 0.0098351 | 0.0128236 | 0.0009393 | 0.0064037 | 0         |
| 0.0210799 | 0.0106546 | 0.0305034 | 0.0140503 | 0.0061833 | 0.0217878 | 0.0277064 | 0.0121822 | 0.0091909 | 0.019317  | 0.0096541 | 0.0018279 | 0.0063746 | 0         |
| 0.004859  | 0.00705   | 0.0006487 | 0.0090578 | 0.0029024 | 0.005688  | 0.0057312 | 0.0158754 | 0.0088844 | 0.0089836 | 0.0073907 | 0.0075958 | 0.0040962 | 0         |
| 0.1294171 | 0.2426741 | 0.1154796 | 0.132946  | 0.0879814 | 0.0423332 | 0.1840901 | 0.0726084 | 0.082512  | 0.0981626 | 0.1398652 | 0.0710122 | 0.0228375 | 0         |
| 0.0031206 | 0.0029679 | 0.0006309 | 0.0011709 | 0.0045531 | 0.0012192 | 0.007557  | 0.0042017 | 0.0069446 | 0.0208273 | 0.0058286 | 0.0024118 | 0.00411   | 0         |
| 0         | 0.0100284 | 0         | 0.0092383 | 0.0070709 | 0.0028927 | 0.01057   | 0.0010647 | 0.0422981 | 0.0886005 | 0.0138234 | 0.1534587 | 0.0544765 | 0         |
| 0         | 0.0051186 | 0.0007199 | 0.0003839 | 0.0035315 | 0.001896  | 0.0007478 | 0.0105899 | 0.0847363 | 0.0119152 | 0.0037179 | 0.0202994 | 0.0065062 | 0         |
| 0.0423631 | 0.0786286 | 0.0289827 | 0.0370144 | 0.0193964 | 0.0383419 | 0.0329464 | 0.018789  | 0.093485  | 0.1056207 | 0.0832075 | 0.0595272 | 0.0432681 | 0         |
| 0.0283188 | 0.0195015 | 0.0520965 | 0.0889544 | 0.0178545 | 0.0159236 | 0.0478668 | 0.0467467 | 0.0526668 | 0.06833   | 0.0467641 | 0.0455187 | 0.0247548 | 0         |
| 0.0342527 | 0.0017156 | 0.0071163 | 0.0021824 | 0.0075848 | 0.0079317 | 0.0053737 | 0.0584441 | 0.0475044 | 0.0299127 | 0.0160312 | 0.0059812 | 0.0096843 | 0         |
| 0.0116329 | 0.0048108 | 0.0006293 | 0.0034454 | 0.0007095 | 0.0008159 | 0.0010862 | 0.0131566 | 0.0052938 | 0.0059869 | 0.0023537 | 0.0016552 | 0.0094747 | 0         |
| 0.0016612 | 0.0060383 | 0.0028261 | 0.0077545 | 0.0030869 | 0.0056695 | 0.0009934 | 0.0008983 | 0.0026316 | 0.0013022 | 0.0056967 | 0.0013963 | 0.0008569 | 0         |
| 0.1089677 | 0.0491836 | 0.0188058 | 0.0635295 | 0.0122751 | 0.048763  | 0.0865963 | 0.1282862 | 0.079263  | 0.0511127 | 0.0469897 | 0.0591515 | 0.029105  | 0         |
| 0.0024886 | 0.0310369 | 0.0036689 | 0.0126971 | 0.0037223 | 0.0277447 | 0.0073769 | 0.0158421 | 0.0179176 | 0.0079435 | 0.0048843 | 0.0076719 | 0.0020412 | 0         |
| 0         | 0.0014432 | 0         | 0         | 0         | 0.0012563 | 0         | 0         | 0         | 0         | 0.0003367 | 0.0086519 | 0         | 0         |
| 0         | 0.0703477 | 0.0066714 | 0.0008369 | 0.0344399 | 0.0450127 | 0.0069375 | 0.0548983 | 0.004567  | 0.0012112 | 0.0173018 | 0.0135921 | 0.0058085 | 0         |
| 0         | 0.0015352 | 0.0001893 | 0         | 0.0003973 | 0.0004218 | 0         | 0.0017682 | 0.0002146 | 0         | 0.0005763 | 0.0003148 | 0.000101  | 0         |
| 0         | 0.1681807 | 0.0225783 | 0.0505177 | 0.002688  | 0.098912  | 0.027802  | 0.0067827 | 0.0045713 | 0.0116054 | 0.0152258 | 0.0004824 | 0.0003978 | 0         |
| 0         | 0.001369  | 0.0003381 | 0.001073  | 0         | 0.0008483 | 0.0003985 | 0         | 0.0003459 | 0.0002383 | 0.0004374 | 0         | 0         | 0         |
| 0         | 0         | 0         | 0         | 0         | 0         | 0         | 0         | 0         | 0.0001235 | 0         | 0         | 5.51E-05  | 0         |
| 0         | 0         | 2.75E-05  | 9.02E-05  | 0         | 0         | 0.0001692 | 0         | 0         | 0         | 0         | 0.0002894 | 0         | 0         |
| 0         | 0         | 0         | 0         | 0         | 0         | 0         | 0         | 0         | 0.00013   | 0         | 0         | 5.36E-05  | 0         |
| 0.0001576 | 0         | 4.53E-05  | 4.80E-05  | 0         | 0         | 0.0001501 | 0         | 0         | 0.0004919 | 0.0002013 | 0         | 7.80E-05  | 0         |
| 0         | 0         | 0.0001375 | 6.72E-05  | 0         | 0         | 0.0017958 | 0         | 0.0003634 | 0.0002297 | 0         | 0         | 0.0004958 | 0         |
| 0         | 0.0004386 | 3.88E-05  | 0         | 0         | 0         | 0         | 0         | 0         | 0.0001322 | 0         | 0         | 0         | 0         |
| 0         | 0         | 0         | 0         | 0         | 0         | 0         | 0         | 0         | 0         | 0         | 0         | 0         | 0         |
| 0         | 0         | 0         | 0         | 0         | 0         | 0         | 0         | 0         | 0         | 0         | 0         | 0         | 0         |
| 0         | 0         | 0         | 0         | 0         | 0         | 0         | 0         | 0         | 0         | 0         | 0         | 0         | 0         |
| 0         | 0         | 0         | 0         | 0         | 0         | 0         | 0         | 0         | 0         | 0         | 0         | 0         | 0         |
| 0         | 0         | 0         | 0         | 0         | 0         | 0         | 0         | 0         | 0         | 0         | 0         | 0         | 0         |
| 0         | 0         | 0         | 0         | 0         | 0         | 0.0001556 | 0         | 0         | 0         | 0         | 0         | 0         | 0         |
| 0         | 0         | 0         | 0         | 0         | 0         | 0         | 0         | 0         | 0         | 0         | 0         | 0         | 0         |
| 4.73E-05  | 0.0001698 | 0         | 3.45E-05  | 0         | 0         | 6.82E-05  | 0.0001664 | 0.0001927 | 0         | 0         | 0         | 0         | 0.000101  |
| 0         | 0         | 0         | 0         | 0         | 0         | 0         | 0         | 0         | 0         | 0         | 0         | 0         | 0         |

| HC02      | HC71      | HC04      | HC05      | HC06      | HC07      | HC08      | HC72      | HC10      | HC11      | HC12      | HC13      | HC14      |
|-----------|-----------|-----------|-----------|-----------|-----------|-----------|-----------|-----------|-----------|-----------|-----------|-----------|
| 0.0009932 | 0.0002177 | 3.69E-05  | 0         | 0.0003322 | 0.0069359 | 0.0011911 | 0         | 0.0038929 | 0.0011548 | 0.0055988 | 0.0024354 | 0.0002719 |
| 0.0039397 | 0.0155932 | 0         | 0         | 0.0083191 | 0.0008063 | 0.0740366 | 0.0455464 | 0         | 0.0001372 | 0.0020786 | 0.0025807 | 0         |
| 0.0005647 | 0.013517  | 0         | 0         | 0.001433  | 0.0047982 | 0.0072852 | 0.0092055 | 0         | 0.0004885 | 0.0060145 | 0.0007591 | 0         |
| 0.0002192 | 0.0010836 | 0.0186609 | 0.0059086 | 0.0067438 | 0.0059143 | 0         | 0.0021945 | 0.0100487 | 0.0001736 | 0.0012364 | 0.010724  | 0.0449904 |
| 0.0064543 | 0.0098644 | 0.0050618 | 0.0271464 | 0.0036044 | 0.0017727 | 0.0001785 | 0.0005814 | 0.0005796 | 5.46E-05  | 0.0136595 | 0         | 0.0013526 |
| 0.0028468 | 0.0091636 | 0         | 0         | 0         | 0.0002101 | 0.0042812 | 0.0125705 | 0         | 0         | 0.021947  | 0.0026043 | 0.0203603 |
| 0.000578  | 0.0088359 | 0.0116293 | 0.0100989 | 0.00324   | 0.0081808 | 0.0027546 | 0.0162204 | 0.0005746 | 0.001229  | 0.0069755 | 0.001155  | 0.0065266 |
| 0.0010264 | 0.0202982 | 0.0037179 | 0.0025021 | 0.0084102 | 0.0027444 | 0.0336373 | 0.0218261 | 0         | 0.009573  | 0.0040169 | 0.0046819 | 0         |
| 0.0129518 | 0.2165586 | 0.522142  | 0.2386802 | 0.0604413 | 0.3157961 | 0.0201165 | 0.0409687 | 0.0016123 | 0.211833  | 0.0379659 | 0.0219455 | 0.0014515 |
| 0.000279  | 0.0201499 | 0.012673  | 0.0213132 | 0.0013324 | 0.0050713 | 0.0012404 | 0.0011204 | 0         | 0.0088619 | 0         | 0.0010025 | 0.0151687 |
| 0.002013  | 0.0570076 | 0.0008152 | 0.0056071 | 0.0047527 | 0.0062295 | 0.0079253 | 0.0187191 | 0         | 0.0024272 | 0.0003185 | 0.0024009 | 0.0312733 |
| 0.002983  | 0.0228935 | 0.0519831 | 0.0008592 | 0.0006472 | 0.0162434 | 0.0031363 | 0.0189847 | 0.0001012 | 0.0015733 | 0.0047781 | 0.0017979 | 0.0027335 |
| 0.0005647 | 0.0012725 | 0.000187  | 0         | 0.0001689 | 0.0002127 | 0.0007879 | 0.0008085 | 0         | 0.0001554 | 0.0579962 | 0.000178  | 0.0021967 |
| 0.0021127 | 0.005236  | 0.0005519 | 0.0027433 | 0.0013078 | 0.0084171 | 0.0086856 | 0.0086896 | 0         | 0.0012444 | 0.0081903 | 0.0038265 | 0.0125941 |
| 0.0027339 | 0.0159639 | 0.1201099 | 0.021283  | 0.0054455 | 0.0369198 | 0.0154383 | 0.00226   | 0         | 0.0068042 | 0.0226273 | 0.0117392 | 0.0071411 |
| 0.0010364 | 0.0004449 | 0.0003741 | 0.0012963 | 0.0003037 | 0.0043359 | 0.0007787 | 0.0001001 | 0         | 5.60E-05  | 0.0015927 | 0.0014365 | 0.0021967 |
| 0.3576214 | 0.2349719 | 0.0046231 | 0.0172133 | 0.6472161 | 0.1998209 | 0.1945818 | 0.1224248 | 0.93887   | 0.4882777 | 0.2829191 | 0.1921578 | 0.646716  |
| 0.0203827 | 0.0149713 | 8.54E-05  | 0         | 0.0227443 | 0.0038264 | 0.0161615 | 0.0044853 | 0.0365474 | 0.0302167 | 0.0107764 | 0.0084448 | 0.0325023 |
| 0.0258272 | 0.0110222 | 4.39E-05  | 0         | 0.0157936 | 0.0054652 | 0.0167094 | 0.0031956 | 0.0009517 | 0.0231493 | 0.0137027 | 0.0158144 | 0.020943  |
| 0.0021625 | 0.0044754 | 0         | 0.000829  | 0.0021429 | 0.0023321 | 0.0626887 | 0.0143723 | 0         | 0.0055683 | 0.0296892 | 0.0051123 | 0.0073495 |
| 0.3599833 | 0.0841253 | 0.0001478 | 0         | 0.0630929 | 0.1050421 | 0.1103916 | 0.1740235 | 0         | 0.0312441 | 0.1665164 | 0.2149696 | 0.0051563 |
| 0.0051555 | 0.0054919 | 0         | 0         | 0.0060206 | 0.0018673 | 0.0049984 | 0.0029838 | 0         | 0.0180667 | 0.0451034 | 0.0031346 | 0.0016246 |
| 0.0316039 | 0.021908  | 0.0007713 | 0         | 0.0015697 | 0.0348425 | 0.0227819 | 0.0071111 | 0         | 0.01284   | 0.0089462 | 0.0100974 | 0.0001554 |
| 0.0040925 | 0.0006482 | 0         | 0.0007084 | 0.0003473 | 0.0012947 | 0.0011726 | 0         | 0         | 0.0478817 | 0.0119966 | 0.0026878 | 0.0273425 |
| 0.0127492 | 0.0308754 | 3.93E-05  | 0         | 0.0233422 | 0.0359008 | 0.0838855 | 0.028583  | 0         | 0.0307024 | 0.0475167 | 0.0937171 | 0.014254  |
| 0.0714359 | 0.0211449 | 0.0003764 | 0         | 0.0139089 | 0.0787219 | 0.0035518 | 0.1305446 | 0         | 0.0179883 | 0.0236801 | 0.0051159 | 0.0433835 |
| 0.0019433 | 0.0068386 | 0         | 0         | 0.0053563 | 0.0111905 | 0.0175404 | 0.0051168 | 0         | 0.0021206 | 0.0340192 | 0.03223   | 0.0182801 |
| 0.0015646 | 0.0028584 | 0         | 0         | 0.0009433 | 0.0039709 | 0.0276787 | 0.0395865 | 0         | 0.002633  | 0.0088274 | 0.0118754 | 0         |
| 0.0035676 | 0.0016457 | 0.0022376 | 0.0006783 | 0.001471  | 0.0042125 | 0.0018436 | 0.0432479 | 0.0007644 | 0.0019345 | 0.0005777 | 0.0032871 | 0         |
| 0.0201801 | 0.0821519 | 0.2354051 | 0.0257295 | 0.0197776 | 0.0630852 | 0.181849  | 0.0967717 | 0         | 0.019034  | 0.058142  | 0.263735  | 0.0280029 |
| 0.0049861 | 0.0082499 | 0.0002217 | 0         | 0.0035    | 0.0083489 | 0.0169064 | 0.0282018 | 0         | 0.0028051 | 0.0166452 | 0.0340624 | 0.0010242 |
| 0         | 0         | 0         | 0         | 0.0011844 | 0         | 0         | 0.0006083 | 0         | 0         | 0.0059119 | 0         | 0         |
| 0.0125997 | 0.0350303 | 0         | 0         | 0.0107752 | 0.0031804 | 0.0284697 | 0.0887943 | 0         | 0.0105878 | 0.0131088 | 0.0073442 | 0.0028254 |
| 0.0003787 | 0.0009042 | 0         | 0         | 0.0002809 | 0.0001051 | 0.0007879 | 0.0022253 | 0         | 0.0002478 | 0         | 7.99E-05  | 0         |
| 0.0218742 | 0.0140265 | 0         | 0         | 0.0529516 | 0.0118496 | 0.0243547 | 0.0058598 | 5.32E-05  | 0.0084588 | 0.0261582 | 0.0257865 | 0.0001695 |
| 0.0004086 | 0         | 0         | 0         | 0.0002486 | 0.0001471 | 0.0004401 | 0.0001656 | 0         | 0         | 0.0002915 | 0.0006029 | 0         |
| 0         | 0         | 0         | 0         | 0         | 0         | 0.0001724 | 0.0007777 | 0         | 4.62E-05  | 0         | 0         | 0         |
| 0         | 0         | 0         | 0         | 0         | 0         | 0         | 7.32E-05  | 0         | 0         | 0         | 0         | 0         |
| 0         | 0         | 0.0003718 | 0.007853  | 0         | 0         | 0.0003109 | 0.0001001 | 0.0041081 | 0         | 0         | 8.90E-05  | 0.0016246 |
| 0         | 0         | 0.0047593 | 0.002276  | 4.18E-05  | 8.93E-05  | 0         | 0.0005852 | 5.57E-05  | 0         | 0         | 0.0001435 | 6.71E-05  |
| 0         | 0.0003301 | 6.00E-05  | 0.6072742 | 0.0005542 | 0         | 0.0004463 | 0         | 0.0010403 | 9.94E-05  | 0.0002106 | 0.0001671 | 0.000219  |
| 0         | 0.00011   | 0.0011662 | 0         | 6.26E-05  | 0         | 0.0001724 | 6.55E-05  | 0         | 0         | 0         | 0         | 0         |
| 0         | 0         | 8.78E-05  | 0         | 0         | 0         | 0         | 0         | 0         | 0         | 0         | 0         | 0         |
| 0         | 0         | 7.16E-05  | 0         | 3.80E-05  | 0         | 0         | 0         | 0         | 4.48E-05  | 0         | 0         | 0         |
| 0         | 0         | 0         | 0         | 0         | 0         | 0         | 0         | 0         | 0         | 0         | 0         | 0         |
| 0         | 0         | 0         | 0         | 0         | 0         | 0         | 0         | 0         | 0         | 0         | 0         | 0         |
| 0         | 0         | 0         | 0         | 0         | 0         | 0         | 0         | 0         | 0         | 0         | 0         | 0         |
| 9.30E-05  | 0         | 9.93E-05  | 0         | 3.80E-05  | 0         | 0         | 0         | 4.56E-05  | 0         | 0         | 0         | 0         |
| 9.30E-05  | 0         | 3.93E-05  | 0         | 3.23E-05  | 0         | 0         | 7.70E-05  | 0         | 0         | 0         | 0         | 0.0001024 |
| 0         | 0.0001196 | 0.0011569 | 0         | 8.35E-05  | 0.0001182 | 0.0006309 | 0.0002233 | 0.0007543 | 0.000287  | 0.0002646 | 7.81E-05  | 0         |
| 0         | 0         | 0.0002933 | 0         | 0         | 0         | 0         | 0         | 0         | 0         | 0         | 0         | 0         |

| HC15      | HC16      | HC17      | HC09      | HC18      |
|-----------|-----------|-----------|-----------|-----------|
| 0.0294991 | 0.0094989 | 0.0017628 | 0         | 0         |
| 0         | 0.0001076 | 0         | 0.0002359 | 0         |
| 0         | 0.0012916 | 0         | 0.0014935 | 0         |
| 0.0123731 | 0.0003767 | 0.002376  | 0.0042018 | 0.0113308 |
| 0.0068154 | 0.0003606 | 6.62E-05  | 0.0014935 | 0         |
| 0.0013809 | 0.0108901 | 0.0003932 | 0.0079424 | 0.0069258 |
| 0.0033542 | 0.0058312 | 0.0037007 | 0.0052878 | 0.0238536 |
| 0.0258773 | 0.0177949 | 0.0229502 | 0.0067017 | 0.0147744 |
| 0.0713231 | 0.2150997 | 0.2244164 | 0.1009785 | 0.0939574 |
| 0.0015915 | 0.0804875 | 0.0540796 | 0.0154361 | 0.0110701 |
| 0.0012899 | 0.0068268 | 0.0323879 | 0.0170322 | 0.0258446 |
| 0.0037521 | 0.1077301 | 0.1365963 | 0.0272264 | 0.1420917 |
| 0.0001231 | 0.0005274 | 0.0003739 | 0.0004764 | 0.003277  |
| 0.0127281 | 0.0114229 | 0.0247322 | 0.0041573 | 0.0247636 |
| 0.0106853 | 0.0137397 | 0.005878  | 0.0116081 | 0.0212815 |
| 0.0018109 | 0.0037    | 0.0052285 | 0.0011764 | 0.0090834 |
| 0.460697  | 0.1126168 | 0.1605337 | 0.4347265 | 0.5334476 |
| 0.0052436 | 0.0217801 | 0.0166683 | 0.0191721 | 0.0011835 |
| 0.0091901 | 0.0123378 | 0.0131641 | 0.0148494 | 0.0105104 |
| 0.0031722 | 0.0070232 | 0.0065233 | 0.0071597 | 0         |
| 0.0394136 | 0.054262  | 0.09276   | 0.0267454 | 0.0003632 |
| 0.0008332 | 0.001515  | 0.0052007 | 0.0295563 | 0         |
| 0.0003087 | 0.0016226 | 0.0001923 | 0.0761846 | 0         |
| 0.0118681 | 0.0072681 | 0.0198755 | 0.0087068 | 0.0011322 |
| 0.047105  | 0.0758564 | 0.0482785 | 0.0755535 | 0.0104036 |
| 0.0849843 | 0.0529757 | 0.0104634 | 0.0246637 | 0.0006622 |
| 0.0334884 | 0.0355226 | 0.0306294 | 0.0220734 | 0.0377692 |
| 0.009638  | 0.0105241 | 0.0084891 | 0.0049876 | 0.0002094 |
| 0.0004104 | 0.0027932 | 0.0175892 | 0.0003646 | 0.008763  |
| 0.1027169 | 0.0945851 | 0.0481182 | 0.0280674 | 0.0040931 |
| 0.0035451 | 0.0024218 | 0.0058438 | 0.0031678 | 0.0009699 |
| 0         | 0         | 0         | 6.59E-05  | 0         |
| 0.0026834 | 0.0109035 | 0         | 0.0158665 | 0         |
| 6.60E-05  | 0.0001157 | 0         | 0.0002145 | 0         |
| 0.000157  | 0.0099617 | 0         | 0.0023513 | 0         |
| 0         | 0.0002287 | 0         | 0         | 0         |
| 0         | 0         | 0         | 0         | 0         |
| 0         | 0         | 0         | 0         | 0         |
| 0         | 0         | 0.0001111 | 0         | 0.0004828 |
| 5.53E-05  | 0         | 0.0002714 | 0         | 0.0012049 |
| 0.00124   | 0         | 0.0001816 | 7.51E-05  | 0         |
| 5.89E-05  | 0         | 0         | 0         | 0         |
| 0         | 0         | 6.62E-05  | 0         | 0         |
| 0.0001178 | 0         | 0         | 0         | 0         |
| 0         | 0         | 0         | 0         | 0         |
| 0         | 0         | 0         | 0         | 0         |
| 0         | 0         | 0         | 0         | 0         |
| 7.49E-05  | 0         | 0         | 0         | 0         |
| 0.0001552 | 0         | 0         | 0         | 0         |
| 0.0001731 | 0         | 9.83E-05  | 0         | 0.0005512 |
| 0         | 0         | 0         | 0         | 0         |

Table S32. The abundance and composition at the genus level of each sample among CP (n=36), SP (n=23), CPR (n=18), and SPR (n=23) groups.

| ID                                   | CP25     | CP26     | CP32     | CP36     | CP34     | CP20     | CP33     | CP10     | CP07     | CP18     |
|--------------------------------------|----------|----------|----------|----------|----------|----------|----------|----------|----------|----------|
| Bacteroides                          | 0.723215 | 0.675336 | 0.5718   | 0.504231 | 0.438893 | 0.322012 | 0.278372 | 0.247034 | 0.18228  | 0.127271 |
| Subdoligranulum                      | 0.049507 | 0.072544 | 7.20E-05 | 0.029256 | 2.00E-05 | 6.02E-04 | 0.07897  | 0.001168 | 0        | 0.75057  |
| Escherichia-Shigella                 | 0.005271 | 3.03E-04 | 4.00E-05 | 0.043374 | 0.064604 | 0.035629 | 0.045804 | 0.246077 | 0.513772 | 0.005694 |
| Lachnospiraceae_incertae_sedis       | 0.020203 | 0.040174 | 0.029211 | 0.097051 | 0.242225 | 0.176061 | 0.160445 | 0.150114 | 2.30E-05 | 2.09E-04 |
| Blautia                              | 0.003013 | 0.020987 | 0.075459 | 0.042651 | 0.036549 | 0.004777 | 0.012784 | 0.007811 | 0.169598 | 5.90E-05 |
| Akkermansia                          | 0        | 8.00E-05 | 0        | 0        | 0        | 0        | 0.030877 | 0        | 3.90E-05 | 2.80E-05 |
| Faecalibacterium                     | 0.007573 | 0.028523 | 5.00E-05 | 0.006981 | 0        | 0.340668 | 0        | 0.136444 | 0        | 0        |
| Megamonas                            | 0.021969 | 0.00844  | 0        | 0        | 0        | 0        | 0.002734 | 2.42E-04 | 0        | 0        |
| Enterococcus                         | 0        | 0        | 0        | 0        | 0        | 0        | 0        | 0.003824 | 0        | 0        |
| Streptococcus                        | 2.23E-04 | 2.10E-05 | 3.59E-04 | 0.005751 | 0.002059 | 2.71E-04 | 0.049904 | 5.60E-05 | 1.62E-04 | 0.037366 |
| Phascolarctobacterium                | 0.010453 | 0.00199  | 0.003355 | 0.010815 | 0.011838 | 0        | 0.06149  | 5.91E-04 | 0.002891 | 0.002159 |
| Prevotella                           | 0.06441  | 0        | 0        | 2.60E-05 | 0.036476 | 0        | 3.80E-05 | 0.001657 | 0        | 0.001213 |
| Ruminococcaceae_uncultured           | 0.001436 | 0.018735 | 6.69E-04 | 0.009356 | 1.04E-04 | 0.002799 | 0.028697 | 3.58E-04 | 7.59E-04 | 2.22E-04 |
| Erysipelotrichaceae_incertae_sedis   | 3.89E-04 | 6.55E-04 | 0.012067 | 0.002995 | 0.004365 | 7.56E-04 | 4.80E-05 | 0.002694 | 5.90E-04 | 0.060204 |
| Bifidobacterium                      | 0.00142  | 0        | 0        | 0        | 2.30E-05 | 0        | 0        | 0.032838 | 0        | 0        |
| Parasutterella                       | 0.005917 | 0        | 0.111454 | 0        | 0        | 0        | 9.90E-04 | 0.026959 | 0        | 0        |
| Anaerostipes                         | 2.80E-05 | 0.002491 | 0.00798  | 0.022353 | 5.66E-04 | 0        | 0        | 0        | 3.40E-05 | 2.50E-05 |
| Fusobacterium                        | 0.026589 | 0        | 0.059216 | 0        | 8.31E-04 | 6.90E-05 | 0.009975 | 0        | 0.003799 | 8.20E-05 |
| Pseudobutyrvibrio                    | 0        | 0.052329 | 2.30E-05 | 0.026756 | 0        | 2.40E-05 | 5.02E-04 | 3.10E-05 | 0        | 0        |
| Lachnospiraceae_uncultured           | 0        | 0.004889 | 0.050165 | 0.020133 | 0.017715 | 0.004063 | 9.63E-04 | 0.006156 | 0        | 0        |
| Peptostreptococcaceae_incertae_sedis | 0        | 5.50E-04 | 0        | 0        | 0.04185  | 1.70E-05 | 1.25E-04 | 0.003962 | 0.001688 | 0        |
| Alistipes                            | 3.40E-05 | 0.003887 | 6.19E-04 | 0.004781 | 3.26E-04 | 0.008743 | 0.036546 | 0.003935 | 1.50E-05 | 1.78E-04 |
| Ruminococcaceae_unclassified         | 9.72E-04 | 0.003833 | 0        | 0.00122  | 3.72E-04 | 4.91E-04 | 0        | 0.073622 | 0        | 0        |
| Erysipelotrichaceae_uncultured       | 0        | 4.00E-05 | 0        | 0.00345  | 0        | 1.26E-04 | 5.10E-05 | 0.00516  | 0        | 0        |
| Actinomyces                          | 8.00E-05 | 5.80E-05 | 8.00E-05 | 0        | 0.001517 | 0        | 1.66E-04 | 0        | 2.16E-04 | 1.03E-04 |
| Lachnospira                          | 0        | 0        | 0        | 1.19E-04 | 0        | 0        | 8.80E-05 | 0        | 0        | 1.52E-04 |
| Lachnospiraceae_unclassified         | 2.46E-04 | 0.012705 | 0.004393 | 0.01103  | 0.007686 | 0.002037 | 0.00249  | 0.001076 | 4.80E-05 | 2.70E-05 |
| Clostridium_sensu_stricto_1          | 0        | 0        | 0        | 0        | 0        | 0        | 0        | 0        | 0        | 9.80E-05 |
| Rothia                               | 7.00E-05 | 2.20E-05 | 2.30E-05 | 0.002074 | 1.53E-04 | 0        | 5.70E-05 | 0        | 2.40E-05 | 0.001873 |
| Roseburia                            | 0.035986 | 0.015125 | 0.002482 | 0.042314 | 0        | 0        | 0.007726 | 0        | 0        | 0        |
| Dorea                                | 0.003803 | 0.002547 | 0.009408 | 0.006105 | 0.005735 | 0        | 0        | 1.41E-04 | 0        | 0.001118 |
| Veillonella                          | 4.20E-05 | 8.20E-04 | 6.04E-04 | 0.003007 | 2.55E-04 | 7.30E-05 | 0.003483 | 5.46E-04 | 0.01536  | 2.30E-05 |
| Klebsiella                           | 0        | 0        | 0        | 0        | 0        | 3.90E-05 | 0        | 0        | 0        | 0        |
| Coprococcus                          | 0        | 0.001193 | 0.01783  | 0.003134 | 0.047243 | 0.003038 | 0        | 0.001906 | 0        | 0        |
| Halomonas                            | 6.80E-05 | 6.62E-04 | 0.004669 | 0.00372  | 7.50E-04 | 9.09E-04 | 2.55E-04 | 0.001086 | 0.002449 | 0.002822 |
| Ruminococcaceae_incertae_sedis       | 6.76E-04 | 0.0121   | 0.016755 | 0.00456  | 0.018386 | 0.001991 | 0.001796 | 0.002995 | 0        | 1.70E-04 |
| Parabacteroides                      | 0.005651 | 0        | 0.005082 | 0.004777 | 0.003819 | 0.018646 | 0.012309 | 0.007836 | 0        | 0.002299 |
| Flavonifractor                       | 0.002747 | 2.54E-04 | 0        | 0.001792 | 9.01E-04 | 0.036355 | 0.00363  | 0.010804 | 0        | 0        |
| Ruminococcus                         | 4.50E-04 | 0.007976 | 5.48E-04 | 0.026248 | 0        | 0        | 0        | 3.12E-04 | 0        | 0        |
| Lactobacillus                        | 0        | 0        | 0        | 0.026665 | 0        | 0        | 0        | 0        | 0.100317 | 0.002933 |
| Dialister                            | 0        | 0        | 0        | 0        | 0        | 0        | 7.12E-04 | 0.001928 | 0        | 0        |
| Sutterella                           | 0        | 0        | 0        | 0        | 0        | 0.002262 | 0.003275 | 0        | 1.34E-04 | 0        |
| Anaerotruncus                        | 1.90E-04 | 0.001112 | 0        | 2.09E-04 | 6.58E-04 | 8.59E-04 | 0.013114 | 1.57E-04 | 0        | 0        |
| Bilophila                            | 5.60E-04 | 0.002054 | 0.005287 | 0.001329 | 3.58E-04 | 0        | 0.001434 | 5.30E-05 | 1.91E-04 | 5.60E-05 |
| Peptostreptococcus                   | 0        | 0        | 0        | 0        | 0        | 0        | 0        | 0        | 0        | 9.10E-05 |
| Bacteria_unclassified                | 0.003591 | 9.85E-04 | 6.78E-04 | 3.58E-04 | 9.80E-04 | 1.99E-04 | 7.46E-04 | 2.31E-04 | 1.40E-04 | 7.90E-05 |
| Defluviitaleaceae_incertae_sedis     | 0        | 0        | 0        | 0        | 7.10E-05 | 0.020571 | 3.14E-04 | 0        | 0        | 0        |
| Prevotellaceae_uncultured            | 0        | 0        | 0        | 0        | 0        | 0        | 0        | 0        | 0        | 5.24E-04 |
| Acidaminococcus                      | 0        | 0        | 0        | 0        | 2.90E-05 | 0        | 0.081088 | 0        | 0        | 0        |
| S24-7_norank                         | 0        | 0        | 0        | 0        | 0        | 0        | 0.04054  | 0        | 0        | 6.20E-05 |
| Paraprevotella                       | 0        | 0        | 0        | 0.025159 | 0.004736 | 0        | 0        | 3.20E-05 | 0        | 7.20E-05 |
| Eubacterium                          | 0        | 0        | 0        | 0        | 0        | 0        | 1.08E-04 | 0        | 0        | 0        |
| Enterobacteriaceae_unclassified      | 3.90E-05 | 0        | 0        | 0        | 0        | 0        | 0        | 0.002093 | 2.63E-04 | 0        |
| Atopobium                            | 0        | 0        | 5.00E-05 | 0        | 5.20E-05 | 0        | 1.50E-04 | 0        | 0        | 6.00E-05 |
| Candidate_division_TM7_norank        | 2.70E-05 | 9.80E-05 | 0        | 2.75E-04 | 9.20E-05 | 7.30E-05 | 4.64E-04 | 0        | 3.42E-04 | 0        |
| Butyrivimonas                        | 0        | 0.002884 | 0        | 0        | 3.10E-05 | 0.003554 | 2.87E-04 | 7.84E-04 | 0        | 0        |
| Intestinimonas                       | 0        | 4.07E-04 | 0        | 1.80E-04 | 0        | 0.001236 | 2.25E-04 | 6.80E-05 | 0        | 0        |
| Granulicatella                       | 0        | 0        | 4.20E-05 | 1.43E-04 | 2.40E-05 | 2.00E-05 | 1.60E-04 | 0        | 1.05E-04 | 2.90E-05 |
| Pelagibacterium                      | 0        | 4.80E-05 | 6.74E-04 | 4.11E-04 | 4.70E-05 | 2.10E-05 | 0        | 1.30E-04 | 2.19E-04 | 3.41E-04 |
| Haemophilus                          | 0        | 2.52E-04 | 0.002555 | 4.70E-05 | 0        | 0        | 7.96E-04 | 0        | 0        | 6.30E-05 |
| Porphyromonas                        | 0        | 0        | 0        | 0        | 0        | 0.001224 | 0        | 0        | 1.80E-05 | 0        |
| Solobacterium                        | 0        | 7.40E-05 | 4.70E-05 | 0        | 2.30E-05 | 0        | 4.40E-05 | 0        | 1.13E-04 | 3.20E-05 |
| Christensenellaceae_uncultured       | 0        | 0        | 0        | 2.00E-05 | 0        | 0        | 0        | 0        | 0        | 0        |
| Allisonella                          | 0        | 0        | 0        | 0        | 0        | 0        | 0        | 0        | 0        | 0        |
| Raoultella                           | 0        | 0        | 0        | 0        | 0        | 0        | 4.40E-05 | 0.002638 | 3.00E-05 | 0        |
| Anaerofilum                          | 0        | 0        | 0        | 0        | 0        | 0        | 0        | 0.011856 | 0        | 0        |
| Mitsuokella                          | 0        | 0        | 0        | 0        | 0        | 0        | 0        | 0        | 0        | 0        |
| Others                               | 0.003152 | 0.002817 | 0.006254 | 0.005144 | 0.007638 | 0.009785 | 0.025184 | 0.002595 | 0.004381 | 0.001693 |

| CP27     | CP14     | CP22     | CP12     | CP16     | CP13     | CP19     | CP01     | CP09     | CP35     | CP29     | CP04     | CP28     |
|----------|----------|----------|----------|----------|----------|----------|----------|----------|----------|----------|----------|----------|
| 0.0979   | 0.089153 | 0.073991 | 0.071768 | 0.052478 | 0.025854 | 0.01871  | 0.018594 | 0.016724 | 0.01599  | 0.011917 | 0.01054  | 0.006326 |
| 0.115172 | 0.173749 | 0.192964 | 0.724186 | 6.30E-05 | 0.455911 | 0.256103 | 0.051749 | 0.162753 | 0.328878 | 0.002133 | 0.864536 | 0.001092 |
| 6.50E-05 | 0        | 1.99E-04 | 0.002029 | 0.087671 | 0.298976 | 0.445284 | 0.005206 | 0.001092 | 0.00462  | 0.001055 | 1.10E-05 | 6.84E-04 |
| 0.246649 | 0.102802 | 0.007873 | 0.017491 | 0.010055 | 0.056271 | 0.008311 | 0.011914 | 0.029645 | 0.033961 | 0.003178 | 0.014479 | 8.37E-04 |
| 0.017046 | 0.06639  | 0.013404 | 7.50E-04 | 0.049028 | 0.053037 | 0.004436 | 0.009518 | 0.332291 | 0.053412 | 0.00198  | 0.039029 | 3.28E-04 |
| 0.013109 | 2.15E-04 | 0        | 0.00151  | 0.709057 | 6.70E-05 | 0.23081  | 0.673565 | 3.20E-05 | 4.30E-05 | 9.00E-05 | 0.011336 | 2.40E-04 |
| 0.233153 | 7.40E-05 | 0.197479 | 0        | 3.06E-04 | 0        | 1.92E-04 | 0.033667 | 4.90E-05 | 0.028481 | 7.46E-04 | 7.80E-05 | 4.09E-04 |
| 1.50E-05 | 2.30E-05 | 0.077966 | 3.65E-04 | 0        | 0        | 0        | 0        | 4.85E-04 | 0.030143 | 3.50E-05 | 0        | 3.08E-04 |
| 0        | 0        | 1.90E-05 | 0.002752 | 0        | 0        | 0        | 0.003032 | 0        | 0        | 1.24E-04 | 0.017012 | 1.14E-04 |
| 1.70E-04 | 0.01615  | 1.03E-04 | 0.001806 | 0.002874 | 4.31E-04 | 0.001615 | 1.66E-04 | 0.001198 | 0.003005 | 0.357979 | 0.002508 | 0.474502 |
| 0.00488  | 3.98E-04 | 1.50E-05 | 0.001948 | 4.90E-05 | 2.15E-04 | 0        | 8.37E-04 | 0        | 2.20E-05 | 4.90E-04 | 7.00E-05 | 1.16E-04 |
| 0.032049 | 0        | 0.344315 | 2.87E-04 | 0.001022 | 0        | 0        | 0        | 0        | 0.01713  | 5.53E-04 | 0        | 0.001174 |
| 0.00543  | 0.010727 | 0.002173 | 0.003197 | 0.02075  | 0.056967 | 0.002418 | 0.003521 | 0.03264  | 0.014352 | 5.53E-04 | 3.25E-04 | 2.08E-04 |
| 0.005209 | 0.029308 | 9.65E-04 | 0.144319 | 0.014924 | 0.004442 | 0.012989 | 0.001971 | 0.011369 | 0.00115  | 1.09E-04 | 0.00481  | 5.80E-05 |
| 3.60E-05 | 0.013999 | 0        | 5.80E-05 | 1.80E-05 | 5.63E-04 | 6.10E-04 | 0.052184 | 0.023522 | 0        | 1.29E-04 | 1.60E-05 | 1.70E-04 |
| 0        | 0        | 0        | 3.70E-05 | 8.68E-04 | 7.23E-04 | 4.60E-05 | 1.34E-04 | 0        | 9.11E-04 | 3.00E-05 | 0        | 3.30E-05 |
| 0.015535 | 0.187197 | 3.60E-05 | 6.80E-05 | 0.001436 | 3.20E-05 | 0        | 7.45E-04 | 0.004967 | 0.001023 | 4.57E-04 | 3.30E-05 | 6.60E-05 |
| 1.90E-05 | 9.91E-04 | 6.97E-04 | 7.51E-04 | 0        | 0        | 6.70E-05 | 0        | 0        | 2.20E-05 | 1.94E-04 | 1.20E-05 | 1.85E-04 |
| 0.045922 | 0.105953 | 0.006675 | 5.70E-05 | 0.019074 | 0        | 2.00E-05 | 2.60E-05 | 0.016773 | 0.03806  | 4.64E-04 | 1.70E-05 | 1.77E-04 |
| 0.001901 | 0.009833 | 0.001081 | 1.48E-04 | 2.02E-04 | 7.10E-05 | 0        | 2.40E-04 | 8.35E-04 | 0.007575 | 1.54E-04 | 0.001759 | 1.26E-04 |
| 1.55E-04 | 0.002645 | 0.005545 | 0        | 0        | 0.001947 | 0        | 3.39E-04 | 0.003237 | 0.284332 | 1.38E-04 | 0        | 6.40E-05 |
| 0.011905 | 5.49E-04 | 0        | 0.002359 | 0.002195 | 0.005098 | 7.10E-05 | 0.001527 | 8.50E-05 | 0.001211 | 3.98E-04 | 5.90E-05 | 2.02E-04 |
| 0.082521 | 7.72E-04 | 0.045382 | 0        | 2.12E-04 | 6.95E-04 | 9.90E-05 | 0.00713  | 1.10E-04 | 0.008535 | 6.50E-05 | 0        | 9.90E-05 |
| 0        | 0        | 0        | 4.44E-04 | 0        | 0        | 1.15E-04 | 0        | 0.136575 | 0.007889 | 3.50E-05 | 0.002667 | 0        |
| 6.01E-04 | 3.68E-04 | 0        | 0.001378 | 6.08E-04 | 0        | 2.70E-04 | 0        | 3.56E-04 | 2.49E-04 | 0.101024 | 0.003965 | 0.291646 |
| 0        | 0.006624 | 0        | 1.40E-05 | 4.60E-05 | 0        | 0        | 0        | 0        | 0.036194 | 0        | 0        | 0        |
| 0.007627 | 0.016377 | 9.91E-04 | 1.62E-04 | 4.06E-04 | 0.001036 | 0        | 6.99E-04 | 0.003395 | 0.014651 | 2.75E-04 | 1.75E-04 | 1.50E-04 |
| 7.90E-05 | 2.30E-05 | 0        | 0        | 0        | 0        | 0        | 0        | 0        | 0.002059 | 0        | 2.00E-05 | 4.72E-04 |
| 4.20E-05 | 7.09E-04 | 2.60E-05 | 3.60E-05 | 7.40E-04 | 1.76E-04 | 8.95E-04 | 3.30E-05 | 6.63E-04 | 0        | 0.346052 | 5.46E-04 | 0.036969 |
| 0.001575 | 0.037571 | 1.45E-04 | 2.09E-04 | 0.007318 | 0        | 0        | 3.40E-05 | 0.055761 | 0.004774 | 8.13E-04 | 0        | 4.30E-04 |
| 0.003047 | 0.013597 | 7.50E-05 | 0        | 9.09E-04 | 9.00E-05 | 0        | 9.00E-05 | 0.066405 | 0.020746 | 1.62E-04 | 1.75E-04 | 9.60E-05 |
| 0.001799 | 0.001971 | 4.58E-04 | 1.58E-04 | 2.10E-05 | 0        | 1.42E-04 | 0.032395 | 1.37E-04 | 5.40E-05 | 0.022174 | 6.20E-05 | 0.008818 |
| 0        | 0        | 0        | 0        | 0        | 4.78E-04 | 0        | 0        | 0        | 5.10E-05 | 0        | 0        | 0        |
| 5.24E-04 | 0.013171 | 3.20E-05 | 3.43E-04 | 0.001051 | 0.005609 | 0        | 1.77E-04 | 0.02798  | 0.001988 | 2.25E-04 | 0        | 8.30E-05 |
| 0.007796 | 3.97E-04 | 0.005945 | 0.004937 | 4.81E-04 | 0.001124 | 0.001954 | 2.14E-04 | 0.009757 | 0.001745 | 0.005929 | 0.006584 | 0.138137 |
| 0.024267 | 0.072083 | 9.30E-05 | 0.005785 | 0.001448 | 9.11E-04 | 2.84E-04 | 0.003699 | 0.006479 | 0.004628 | 1.47E-04 | 9.10E-05 | 1.51E-04 |
| 9.38E-04 | 0.001184 | 0.003368 | 0.001009 | 0.001631 | 4.57E-04 | 7.10E-05 | 7.16E-04 | 2.60E-05 | 7.81E-04 | 2.01E-04 | 2.56E-04 | 8.40E-05 |
| 0        | 0.011082 | 6.31E-04 | 2.45E-04 | 0        | 0.003558 | 0        | 0.001327 | 9.60E-05 | 8.40E-05 | 4.70E-05 | 0        | 1.40E-05 |
| 0        | 0        | 1.80E-05 | 5.90E-05 | 0        | 0.012286 | 0.001336 | 4.30E-05 | 0        | 0        | 3.79E-04 | 0        | 8.60E-05 |
| 0        | 0        | 3.40E-05 | 6.40E-05 | 0.001471 | 0        | 0        | 0        | 2.80E-05 | 2.50E-05 | 0.007927 | 0        | 1.29E-04 |
| 9.70E-05 | 8.30E-05 | 1.70E-05 | 3.50E-05 | 3.74E-04 | 0        | 2.50E-05 | 7.00E-05 | 1.66E-04 | 0.002086 | 1.20E-05 | 0        | 0        |
| 0        | 3.30E-05 | 8.88E-04 | 8.20E-05 | 0        | 0        | 0        | 0        | 0        | 0        | 1.40E-05 | 0        | 0        |
| 0.001264 | 0.001924 | 1.56E-04 | 5.16E-04 | 0.00124  | 2.48E-04 | 3.30E-05 | 9.60E-05 | 8.30E-05 | 0.010557 | 6.90E-05 | 0        | 0        |
| 0        | 0        | 1.68E-04 | 1.93E-04 | 6.80E-05 | 0        | 0        | 0.001104 | 0        | 0        | 5.00E-05 | 0        | 1.30E-05 |
| 2.10E-05 | 3.40E-04 | 1.70E-05 | 0        | 3.56E-04 | 0        | 0        | 0.039639 | 3.66E-04 | 0        | 0.063338 | 4.90E-05 | 1.20E-04 |
| 5.88E-04 | 7.18E-04 | 2.34E-04 | 0.001071 | 0.001006 | 7.60E-05 | 0        | 3.00E-05 | 4.70E-05 | 4.80E-05 | 0        | 4.24E-04 | 0        |
| 0        | 0        | 0        | 2.80E-05 | 0        | 0        | 0        | 5.80E-05 | 0.028261 | 0        | 0        | 2.20E-05 | 0        |
| 0        | 0        | 0        | 0        | 0        | 0        | 0        | 0        | 0        | 0        | 0        | 0        | 4.80E-05 |
| 0        | 0        | 0        | 0.002302 | 0        | 0        | 0        | 0        | 0        | 0        | 2.22E-04 | 0        | 6.90E-05 |
| 0        | 0        | 0        | 0.001893 | 0        | 0        | 0        | 0        | 0        | 0        | 1.79E-04 | 0        | 1.80E-05 |
| 0.005675 | 0        | 0.011308 | 0        | 0        | 0        | 0        | 0        | 7.10E-05 | 3.94E-04 | 2.32E-04 | 0        | 8.10E-05 |
| 0        | 0        | 0        | 0        | 0        | 0        | 0.006658 | 0.001179 | 0        | 0        | 0        | 0.01072  | 0        |
| 0        | 0        | 0        | 0        | 1.70E-05 | 1.30E-04 | 0        | 3.30E-05 | 0        | 0        | 0        | 0        | 0        |
| 6.20E-05 | 9.50E-05 | 0        | 0        | 1.38E-04 | 4.00E-05 | 2.00E-05 | 0        | 0        | 1.37E-04 | 0.006647 | 3.26E-04 | 4.17E-04 |
| 0.002779 | 3.37E-04 | 1.21E-04 | 0        | 2.30E-05 | 4.10E-05 | 1.13E-04 | 0        | 5.08E-04 | 4.26E-04 | 0.011503 | 2.50E-05 | 0        |
| 0.001167 | 7.64E-04 | 3.90E-05 | 0        | 0.003743 | 2.41E-04 | 0        | 0        | 0        | 2.40E-05 | 0        | 0        | 4.00E-05 |
| 2.86E-04 | 0.001616 | 3.70E-05 | 0        | 0        | 0.001902 | 0        | 6.05E-04 | 0        | 4.10E-05 | 0        | 0        | 0        |
| 0        | 1.57E-04 | 2.20E-05 | 0        | 3.10E-05 | 0        | 2.78E-04 | 9.30E-05 | 0        | 4.80E-05 | 1.56E-04 | 3.29E-04 | 0        |
| 9.55E-04 | 6.20E-05 | 4.20E-04 | 5.18E-04 | 1.40E-04 | 3.50E-05 | 5.31E-04 | 3.20E-05 | 9.15E-04 | 2.62E-04 | 0.002958 | 7.67E-04 | 0.011372 |
| 0.002605 | 1.75E-04 | 5.20E-05 | 3.50E-05 | 2.40E-05 | 0        | 0        | 0        | 2.10E-05 | 2.70E-05 | 0        | 0        | 2.00E-05 |
| 4.00E-05 | 0        | 0        | 0        | 0        | 0        | 0        | 0.033805 | 0        | 0        | 0        | 0        | 5.10E-05 |
| 1.95E-04 | 4.63E-04 | 3.60E-05 | 0        | 9.70E-05 | 0        | 7.13E-04 | 3.40E-05 | 2.52E-04 | 2.06E-04 | 0.018173 | 7.00E-04 | 1.60E-05 |
| 0        | 0        | 0        | 0        | 0        | 0        | 0        | 0.003004 | 0        | 0.003167 | 0        | 0        | 0        |
| 0        | 0        | 0        | 0        | 0        | 0        | 0        | 0        | 0        | 5.30E-05 | 0        | 0        | 0        |
| 0        | 0        | 0        | 0        | 0        | 3.30E-05 | 4.10E-05 | 4.10E-05 | 0        | 0        | 0        | 2.30E-05 | 5.90E-05 |
| 1.66E-04 | 2.40E-05 | 0        | 0        | 0        | 0        | 0        | 9.81E-04 | 0        | 0        | 0        | 0        | 0        |
| 0        | 0        | 0        | 0        | 0        | 0        | 0        | 0        | 0        | 0        | 0        | 0        | 0        |
| 0.006964 | 0.007124 | 0.003787 | 0.002598 | 0.004331 | 0.010229 | 0.00474  | 0.003704 | 0.023845 | 0.01375  | 0.028086 | 0.005444 | 0.022893 |

| CP05     | CP30     | CP21     | CP08     | CP11     | CP06     | CP31     | CP03     | CP24     | CP17     | CP15     | CP02     | CP23     |
|----------|----------|----------|----------|----------|----------|----------|----------|----------|----------|----------|----------|----------|
| 0.004666 | 0.003566 | 0.003127 | 0.002575 | 0.001054 | 8.36E-04 | 5.41E-04 | 5.07E-04 | 4.44E-04 | 2.31E-04 | 1.53E-04 | 6.50E-05 | 2.50E-05 |
| 0.910001 | 3.49E-04 | 0        | 0.081568 | 0.06721  | 0.922572 | 0        | 4.60E-04 | 0        | 0.003091 | 1.58E-04 | 8.85E-04 | 6.80E-05 |
| 2.50E-05 | 1.18E-04 | 0.774821 | 0.009555 | 0.006111 | 0        | 0.988449 | 0.842888 | 6.60E-05 | 0.003791 | 0        | 0.004159 | 1.30E-05 |
| 0.030018 | 1.77E-04 | 0.001097 | 0.032404 | 0.002869 | 0.006005 | 3.60E-05 | 5.36E-04 | 3.60E-05 | 0.020696 | 0.638001 | 1.01E-04 | 0        |
| 0.00142  | 2.50E-05 | 7.00E-05 | 0.223586 | 0.00737  | 0.013917 | 1.32E-04 | 6.90E-05 | 0        | 0.038646 | 4.20E-05 | 3.28E-04 | 0        |
| 0        | 8.90E-05 | 0        | 3.10E-05 | 0.870406 | 0        | 0        | 0.005649 | 0        | 0.903709 | 4.50E-05 | 0        | 0        |
| 0.02605  | 0        | 0        | 0.012779 | 7.63E-04 | 0.03504  | 6.70E-05 | 7.40E-05 | 0        | 0        | 0        | 9.50E-05 | 4.00E-05 |
| 4.60E-05 | 3.63E-04 | 2.90E-05 | 0        | 0        | 8.28E-04 | 0.004943 | 0        | 0.008415 | 0        | 2.00E-05 | 1.01E-04 | 0        |
| 0.005991 | 0        | 4.12E-04 | 0        | 2.90E-05 | 0        | 5.90E-05 | 1.03E-04 | 0.9813   | 2.30E-05 | 0        | 0.00664  | 0.9747   |
| 1.51E-04 | 0.630366 | 5.33E-04 | 0.004798 | 0        | 9.70E-05 | 6.00E-05 | 0.009209 | 0.002968 | 0.00277  | 0.062043 | 0.350637 | 0.005945 |
| 0        | 3.90E-04 | 7.48E-04 | 1.03E-04 | 0        | 2.40E-05 | 0        | 4.37E-04 | 0        | 2.90E-05 | 0        | 0        | 4.00E-05 |
| 0        | 8.10E-04 | 0        | 0        | 2.60E-05 | 0.002773 | 0        | 3.40E-05 | 2.80E-05 | 0.002072 | 0        | 0        | 5.60E-05 |
| 0.001032 | 2.70E-05 | 1.00E-04 | 0.008267 | 0.00116  | 5.81E-04 | 0        | 0.0287   | 0        | 1.18E-04 | 0        | 3.70E-05 | 0        |
| 9.46E-04 | 0        | 0.010155 | 0.016373 | 8.39E-04 | 2.28E-04 | 0        | 0        | 3.10E-05 | 0.006518 | 0.083073 | 0        | 2.40E-05 |
| 0        | 4.80E-05 | 0        | 0        | 2.50E-05 | 0        | 9.70E-05 | 2.70E-05 | 0        | 0        | 0        | 0.570012 | 0        |
| 4.40E-05 | 2.50E-05 | 0        | 0        | 0        | 0        | 0        | 0        | 0        | 0        | 0        | 0        | 0        |
| 5.60E-05 | 0        | 0        | 0.412912 | 9.90E-05 | 3.30E-05 | 0        | 0        | 0        | 9.40E-05 | 2.88E-04 | 3.20E-05 | 0        |
| 0        | 3.07E-04 | 0        | 0        | 3.40E-05 | 0        | 0        | 3.70E-05 | 1.46E-04 | 0        | 0        | 0        | 0        |
| 9.95E-04 | 0        | 0        | 0.100317 | 0        | 4.55E-04 | 6.10E-05 | 0        | 3.50E-05 | 1.60E-05 | 1.90E-05 | 1.65E-04 | 0        |
| 4.13E-04 | 0        | 0        | 3.28E-04 | 0        | 0.001522 | 0        | 0        | 0        | 0.001583 | 0        | 0        | 0        |
| 0        | 4.60E-05 | 0        | 0        | 0        | 0        | 0        | 0.018822 | 6.20E-05 | 0        | 0.042653 | 8.45E-04 | 0        |
| 4.30E-05 | 0        | 0        | 0        | 0        | 9.70E-05 | 0        | 1.52E-04 | 0        | 0        | 0        | 0        | 0        |
| 0.006658 | 2.00E-05 | 0        | 0.005678 | 3.37E-04 | 7.69E-04 | 3.40E-05 | 0        | 2.70E-05 | 0        | 0        | 0        | 2.40E-05 |
| 0        | 0        | 0        | 0        | 0        | 0        | 0        | 0        | 0        | 0        | 0        | 0        | 0        |
| 5.06E-04 | 0.168581 | 0.002362 | 9.60E-04 | 6.20E-05 | 1.49E-04 | 0        | 1.43E-04 | 4.18E-04 | 1.80E-04 | 0.003321 | 0.005383 | 0        |
| 0        | 0        | 0        | 0        | 0        | 0        | 1.27E-04 | 0        | 0        | 0        | 0        | 1.29E-04 | 0        |
| 0.001468 | 0        | 0        | 0.024748 | 0.032306 | 8.80E-05 | 0        | 0        | 0        | 1.74E-04 | 0.001518 | 0        | 0        |
| 0        | 2.57E-04 | 0        | 0        | 0        | 0        | 0        | 0.05411  | 0        | 2.60E-05 | 0.085615 | 2.18E-04 | 0        |
| 4.60E-05 | 0.107765 | 2.24E-04 | 5.80E-05 | 0        | 4.70E-05 | 0        | 0        | 1.99E-04 | 9.73E-04 | 0.008486 | 0.007555 | 3.20E-05 |
| 0.001014 | 2.46E-04 | 0        | 0.013814 | 4.75E-04 | 0.004007 | 8.00E-05 | 0        | 0        | 3.45E-04 | 0        | 3.40E-05 | 2.00E-05 |
| 0.003521 | 0        | 0        | 0.024794 | 0.0022   | 1.90E-05 | 2.50E-05 | 0        | 0        | 0.005662 | 0        | 1.03E-04 | 0        |
| 0        | 0.002366 | 4.54E-04 | 4.50E-05 | 0        | 0        | 1.29E-04 | 0.02221  | 3.40E-05 | 0        | 0.048057 | 0.011593 | 0.00216  |
| 0        | 0        | 0.184056 | 0        | 0        | 0        | 0        | 0        | 0        | 0        | 3.80E-05 | 0        | 0        |
| 5.75E-04 | 0        | 0        | 0.008427 | 1.68E-04 | 0.001255 | 3.20E-05 | 0        | 0        | 5.60E-05 | 0        | 3.40E-05 | 0        |
| 5.37E-04 | 0.009568 | 0.002019 | 0.002164 | 7.10E-05 | 5.57E-04 | 3.40E-05 | 3.59E-04 | 0        | 0.001148 | 0.004968 | 0.002135 | 0.012869 |
| 0.001794 | 0        | 0        | 0.001015 | 3.51E-04 | 3.23E-04 | 2.30E-05 | 0        | 0        | 9.24E-04 | 0        | 5.50E-05 | 0        |
| 7.20E-05 | 6.80E-05 | 0        | 3.30E-05 | 0        | 0        | 2.51E-04 | 5.30E-05 | 3.40E-05 | 0        | 2.50E-05 | 0        | 0        |
| 0        | 0        | 0        | 0        | 0        | 1.82E-04 | 2.80E-05 | 0        | 0        | 0        | 0        | 0        | 0        |
| 2.30E-05 | 0        | 0        | 9.40E-05 | 0.002539 | 1.50E-05 | 0        | 0        | 0        | 0        | 0        | 0        | 0        |
| 0        | 7.20E-05 | 0        | 7.20E-05 | 0        | 0        | 0        | 9.80E-05 | 4.75E-04 | 0        | 0        | 0.022134 | 0        |
| 0        | 4.80E-05 | 0        | 4.86E-04 | 0        | 0        | 3.40E-05 | 0        | 0        | 0        | 0        | 0        | 0        |
| 0        | 0        | 0        | 0        | 0        | 0        | 3.50E-05 | 0        | 0        | 0        | 0        | 0        | 0        |
| 6.20E-05 | 0        | 0        | 0        | 0        | 4.80E-05 | 0        | 8.00E-05 | 0        | 0        | 0        | 6.20E-05 | 0        |
| 0        | 0        | 0        | 0        | 0        | 0        | 0        | 0        | 0        | 0        | 0        | 0        | 0        |
| 5.40E-05 | 0.0091   | 0        | 0        | 0        | 0        | 0        | 0        | 0        | 6.50E-05 | 0        | 2.79E-04 | 1.26E-04 |
| 2.80E-05 | 1.39E-04 | 0        | 5.30E-05 | 0        | 1.47E-04 | 0        | 4.61E-04 | 0        | 0        | 0        | 3.40E-05 | 0        |
| 0        | 0        | 0        | 0        | 0        | 0        | 0        | 0        | 0        | 0        | 0        | 0        | 0        |
| 0        | 0        | 0        | 0.001548 | 0        | 0        | 0        | 0        | 0        | 0        | 0        | 0        | 0        |
| 0        | 0        | 0        | 0        | 0        | 0        | 3.00E-05 | 1.22E-04 | 0        | 0        | 0        | 0        | 2.60E-05 |
| 0        | 0        | 0        | 0        | 0        | 0        | 0        | 1.49E-04 | 0        | 0        | 0        | 0        | 2.30E-05 |
| 0        | 0        | 0        | 5.80E-05 | 3.20E-05 | 0        | 0        | 0        | 0        | 2.20E-05 | 0        | 0        | 0        |
| 0        | 0        | 0        | 0.001358 | 0        | 0        | 0        | 0        | 0        | 0.002084 | 0        | 0        | 0        |
| 0        | 0        | 0        | 0        | 0        | 0        | 0        | 3.20E-05 | 0        | 0        | 0        | 0        | 0        |
| 2.30E-05 | 0.036283 | 1.74E-04 | 1.73E-04 | 0        | 0        | 0        | 4.70E-05 | 3.60E-05 | 0        | 9.05E-04 | 0.002213 | 4.80E-05 |
| 5.08E-04 | 0.001833 | 5.80E-04 | 5.16E-04 | 0        | 2.93E-04 | 0        | 2.52E-04 | 0        | 4.67E-04 | 0        | 5.40E-05 | 0        |
| 0        | 0        | 0        | 0        | 0        | 0        | 0        | 0        | 0        | 0        | 0        | 0        | 0        |
| 0        | 0        | 0        | 0        | 0        | 1.50E-05 | 0        | 0        | 0        | 0        | 0        | 0        | 0        |
| 2.20E-05 | 0.011094 | 0        | 1.58E-04 | 0        | 1.40E-05 | 0        | 3.50E-05 | 0.002165 | 8.90E-05 | 0.006364 | 0.008327 | 2.30E-05 |
| 8.90E-05 | 0.001251 | 2.66E-04 | 1.56E-04 | 0        | 4.90E-05 | 0        | 4.10E-05 | 0        | 9.80E-05 | 5.32E-04 | 1.65E-04 | 0.001701 |
| 0        | 0        | 0        | 0        | 0        | 0        | 0        | 0.010164 | 0        | 0        | 0        | 0        | 0        |
| 0        | 0        | 0        | 0        | 0        | 0        | 0        | 0        | 0        | 0        | 0        | 0        | 0        |
| 0        | 6.80E-05 | 1.65E-04 | 2.70E-04 | 0        | 0        | 0        | 1.75E-04 | 0        | 0.001327 | 7.70E-05 | 2.17E-04 | 2.30E-04 |
| 0        | 0        | 0        | 3.00E-05 | 7.00E-04 | 0        | 0        | 0        | 0        | 0        | 0        | 0        | 0        |
| 0        | 0        | 0        | 0        | 0        | 0        | 0        | 0        | 0        | 0        | 0        | 0        | 0        |
| 0        | 0        | 0.016563 | 0        | 0        | 0        | 0.004054 | 2.29E-04 | 0        | 0        | 0        | 0        | 0        |
| 0        | 0        | 0        | 0        | 0        | 3.90E-05 | 0        | 0        | 0        | 0        | 0        | 0        | 0        |
| 0        | 0        | 0        | 1.19E-04 | 0        | 0        | 0        | 0        | 0        | 0        | 0        | 0        | 0        |
| 0.001103 | 0.014535 | 0.002045 | 0.007577 | 0.002764 | 0.006976 | 6.39E-04 | 0.003536 | 0.003081 | 0.002973 | 0.013599 | 0.005174 | 0.001807 |

| CPR17    | CPR03    | CPR08    | CPR11    | CPR10    | CPR16    | CPR06    | CPR14    | CPR13    | CPR09    | CPR01    | CPR05    | CPR12    |
|----------|----------|----------|----------|----------|----------|----------|----------|----------|----------|----------|----------|----------|
| 0.890789 | 0.85981  | 0.858138 | 0.775461 | 0.760073 | 0.717122 | 0.709382 | 0.663219 | 0.634182 | 0.610854 | 0.574327 | 0.349883 | 0.321881 |
| 0.022065 | 2.70E-04 | 5.80E-05 | 7.50E-05 | 5.33E-04 | 0.017703 | 0.001932 | 0.151191 | 0        | 0.009342 | 6.12E-04 | 0.054107 | 0.432969 |
| 0.001878 | 0.011692 | 0.005174 | 0        | 0        | 0        | 0        | 0        | 0.047653 | 1.23E-04 | 0.009151 | 0        | 0.002038 |
| 0.004553 | 0.033987 | 0.027994 | 0.065761 | 0.020732 | 0.008712 | 0.008009 | 0.004434 | 0.043364 | 0.016353 | 0.0432   | 0.026335 | 0.005268 |
| 0.004846 | 0.013202 | 0.007539 | 3.24E-04 | 0.010388 | 0.003281 | 0.006255 | 0.002694 | 0.006198 | 0.011667 | 0.038    | 0.023607 | 0.016797 |
| 0        | 0.002309 | 0        | 0        | 0        | 0        | 4.00E-05 | 0.028665 | 6.21E-04 | 5.40E-05 | 0.222526 | 0        | 0        |
| 0        | 0        | 0.045201 | 0        | 2.92E-04 | 0.00312  | 2.50E-05 | 0.049053 | 0.001359 | 0.053859 | 3.01E-04 | 0.209969 | 2.60E-05 |
| 0.015339 | 0        | 0        | 0.061212 | 0        | 0        | 8.50E-05 | 0        | 0        | 0        | 0        | 0.017508 | 0        |
| 0        | 0        | 0        | 0        | 0        | 0        | 0        | 0        | 0        | 0        | 9.20E-05 | 0        | 0        |
| 3.00E-05 | 0        | 1.91E-04 | 2.95E-04 | 0        | 0        | 1.90E-05 | 1.60E-04 | 4.00E-05 | 2.79E-04 | 1.70E-04 | 2.24E-04 | 0        |
| 0.00373  | 0.015138 | 0.006451 | 0.014713 | 0.009994 | 0.06485  | 0.004372 | 0.017356 | 0.035863 | 0        | 0.001432 | 0.048161 | 0.028514 |
| 0        | 0        | 0        | 0        | 0        | 0        | 4.60E-05 | 0        | 0        | 0        | 0        | 0.025455 | 3.20E-05 |
| 0.001153 | 0.002626 | 3.29E-04 | 5.10E-05 | 0.063813 | 4.00E-05 | 0.024439 | 0.006524 | 0.034115 | 0.126707 | 0.009268 | 0.035512 | 0.010104 |
| 1.03E-04 | 6.48E-04 | 6.85E-04 | 0.001219 | 6.20E-04 | 1.55E-04 | 0.001446 | 4.77E-04 | 0.003357 | 3.12E-04 | 8.65E-04 | 4.78E-04 | 0.001656 |
| 4.51E-04 | 0        | 0        | 0        | 0.007165 | 0        | 0        | 0.001176 | 0        | 4.70E-05 | 1.78E-04 | 0        | 0.001585 |
| 0.016403 | 0        | 0.009502 | 6.70E-05 | 0        | 0.140178 | 0        | 0.027124 | 0.016106 | 0        | 0        | 0        | 0.030107 |
| 0.001316 | 1.38E-04 | 0.002371 | 0        | 0.001541 | 0        | 0        | 2.70E-05 | 2.73E-04 | 0.004812 | 3.90E-05 | 0        | 0        |
| 0        | 0.030135 | 0.008485 | 0        | 3.64E-04 | 0        | 0.180934 | 2.01E-04 | 0        | 0        | 9.07E-04 | 0        | 5.20E-05 |
| 0.012036 | 0        | 0        | 0        | 0.001589 | 5.36E-04 | 0        | 0        | 0.003986 | 0.008028 | 0        | 0.014819 | 0        |
| 0.002864 | 2.31E-04 | 0.004455 | 2.30E-05 | 0.006946 | 0.006307 | 7.10E-05 | 4.10E-05 | 0.003316 | 0.001784 | 0.001859 | 0.003626 | 2.90E-05 |
| 1.27E-04 | 4.40E-05 | 0        | 0.066548 | 3.57E-04 | 1.88E-04 | 3.26E-04 | 4.34E-04 | 7.79E-04 | 0.001309 | 0        | 0.002214 | 2.14E-04 |
| 2.18E-04 | 0.001169 | 0.001271 | 0        | 0.040539 | 0        | 0.001509 | 0.009404 | 0.100431 | 0.021839 | 0.008849 | 0.029394 | 0.103748 |
| 8.20E-05 | 0        | 2.30E-05 | 0        | 0.002037 | 0.00149  | 1.98E-04 | 0.006303 | 0.002694 | 0.00257  | 2.80E-05 | 0.011742 | 0.002346 |
| 0.001754 | 0        | 4.20E-05 | 0        | 6.30E-05 | 0        | 2.20E-05 | 0        | 0        | 0        | 0        | 0        | 0        |
| 0        | 0        | 2.10E-05 | 3.20E-04 | 0        | 1.06E-04 | 0        | 8.20E-05 | 5.30E-05 | 0        | 4.61E-04 | 0        | 0        |
| 0        | 0        | 0        | 0        | 1.43E-04 | 0        | 0        | 0        | 3.80E-04 | 6.88E-04 | 0        | 2.13E-04 | 0        |
| 0.001875 | 5.20E-05 | 3.04E-04 | 9.90E-05 | 7.53E-04 | 9.93E-04 | 1.24E-04 | 1.08E-04 | 9.74E-04 | 0.006166 | 8.90E-05 | 0.005054 | 4.21E-04 |
| 4.48E-04 | 4.90E-05 | 0        | 0        | 0        | 4.90E-04 | 8.00E-05 | 8.71E-04 | 4.51E-04 | 2.75E-04 | 0        | 6.84E-04 | 0.00216  |
| 0        | 0        | 0        | 0        | 0        | 0        | 0        | 0        | 0        | 0        | 0        | 3.50E-05 | 0        |
| 0.003098 | 0        | 1.60E-05 | 0        | 0.001655 | 5.21E-04 | 0        | 0        | 2.50E-04 | 0.00374  | 0        | 0.039789 | 0        |
| 3.41E-04 | 0        | 1.78E-04 | 0        | 0.001465 | 3.23E-04 | 2.10E-05 | 0.001368 | 3.26E-04 | 0.001138 | 9.70E-05 | 1.78E-04 | 0        |
| 2.40E-05 | 0        | 3.20E-05 | 3.00E-05 | 0        | 3.50E-05 | 7.80E-05 | 0        | 8.60E-05 | 4.60E-05 | 0        | 8.40E-05 | 4.05E-04 |
| 0        | 0        | 0        | 0        | 0        | 0        | 0        | 0        | 0        | 0        | 0        | 0        | 0        |
| 3.74E-04 | 0        | 6.41E-04 | 2.50E-05 | 2.60E-05 | 6.45E-04 | 1.13E-04 | 0        | 1.66E-04 | 6.96E-04 | 0        | 0.01121  | 0.001667 |
| 2.79E-04 | 1.66E-04 | 5.30E-05 | 5.90E-05 | 9.10E-05 | 1.99E-04 | 2.40E-05 | 6.00E-05 | 4.10E-05 | 1.40E-04 | 2.50E-05 | 3.00E-05 | 0        |
| 2.96E-04 | 0        | 5.31E-04 | 6.39E-04 | 0.008495 | 0.005064 | 3.19E-04 | 3.91E-04 | 0.016551 | 5.55E-04 | 5.54E-04 | 0.001269 | 0.005051 |
| 0.005254 | 0.003999 | 0.005345 | 4.51E-04 | 0.01636  | 0.019112 | 0        | 0.003966 | 0.008731 | 3.47E-04 | 0.03687  | 0.030055 | 0.00963  |
| 0.001127 | 0.018111 | 0.005528 | 0.007503 | 0.015564 | 0        | 0.004021 | 1.75E-04 | 4.30E-05 | 0.019807 | 0.007572 | 0.00213  | 0.00213  |
| 0        | 0        | 2.97E-04 | 0        | 0        | 0        | 0        | 0.004122 | 0        | 0        | 0        | 0        | 0.009838 |
| 0        | 0        | 0        | 0        | 0        | 0        | 1.58E-04 | 0        | 0        | 0        | 0        | 2.10E-05 | 0        |
| 0        | 0        | 0        | 0        | 0        | 0        | 2.90E-05 | 0        | 0        | 0.004271 | 0        | 0        | 0        |
| 0        | 0        | 3.80E-04 | 0        | 0.011316 | 0        | 0.003962 | 0        | 0        | 0.008557 | 0.001909 | 0.028024 | 0        |
| 0.001993 | 0.00569  | 1.62E-04 | 0        | 0.002158 | 3.08E-04 | 0.01067  | 3.65E-04 | 0.00514  | 0.004006 | 0.001601 | 0.001017 | 8.05E-04 |
| 3.53E-04 | 0        | 4.72E-04 | 0        | 4.00E-05 | 0        | 0        | 0.002042 | 0.00168  | 0        | 0.001406 | 0        | 0        |
| 0        | 0        | 0        | 0        | 0        | 0        | 2.10E-05 | 2.30E-05 | 0        | 0        | 0        | 0        | 0        |
| 0.002274 | 8.50E-05 | 0.001547 | 0        | 5.95E-04 | 5.21E-04 | 0.001336 | 9.10E-04 | 4.03E-04 | 0.003051 | 6.50E-05 | 8.27E-04 | 1.24E-04 |
| 0.001555 | 0        | 0.00302  | 0        | 0        | 0        | 0        | 0        | 0        | 0        | 0        | 0        | 6.00E-05 |
| 0        | 0        | 0        | 0        | 0        | 0        | 0.036066 | 0        | 0        | 0.044291 | 0        | 0        | 0        |
| 0        | 0        | 0        | 0        | 0        | 0        | 0        | 0        | 0        | 0        | 0        | 0        | 0        |
| 0        | 0        | 0        | 0        | 0        | 0        | 0        | 0        | 0        | 0.02256  | 0        | 0.007879 | 0        |
| 3.72E-04 | 0        | 0        | 0        | 0        | 0.006703 | 0.006654 | 0        | 0        | 0.002379 | 0        | 0        | 0        |
| 0        | 2.80E-05 | 0        | 0        | 0        | 0        | 0        | 0        | 0        | 0        | 1.83E-04 | 0        | 0        |
| 4.00E-05 | 0        | 3.10E-05 | 0        | 0        | 0        | 0        | 0        | 0.001052 | 0        | 0        | 0        | 2.52E-04 |
| 0        | 0        | 0        | 0        | 0        | 0        | 0        | 0        | 4.90E-05 | 0        | 0        | 0        | 0        |
| 2.80E-05 | 1.78E-04 | 0        | 5.40E-05 | 0        | 5.60E-05 | 0        | 0        | 3.90E-05 | 0        | 8.00E-05 | 7.00E-05 | 0        |
| 0        | 0        | 3.72E-04 | 0        | 0.001742 | 0        | 0        | 0        | 0.002416 | 4.62E-04 | 0.019079 | 0.002639 | 0        |
| 0        | 0        | 1.88E-04 | 0        | 6.46E-04 | 0.001085 | 1.64E-04 | 7.40E-05 | 0.01127  | 2.69E-04 | 8.56E-04 | 0.002812 | 0.001201 |
| 0        | 0        | 0        | 1.90E-05 | 0        | 0        | 4.20E-05 | 0        | 0        | 0        | 0        | 2.80E-05 | 0        |
| 0        | 0        | 5.50E-05 | 2.80E-05 | 0        | 0        | 0        | 0        | 3.60E-05 | 4.50E-05 | 0        | 3.50E-05 | 0        |
| 0        | 0        | 0        | 0        | 4.60E-05 | 0        | 5.04E-04 | 0        | 0        | 0        | 0        | 0.003032 | 0        |
| 0        | 0        | 1.24E-04 | 0        | 0        | 0        | 0        | 1.96E-04 | 0        | 0        | 0        | 0        | 0        |
| 0        | 0        | 0        | 5.30E-05 | 0        | 0        | 0        | 2.50E-05 | 0        | 0        | 0        | 1.80E-05 | 0        |
| 0        | 0        | 0        | 0        | 0        | 0        | 0        | 3.64E-04 | 0        | 4.40E-05 | 0        | 0        | 0        |
| 0        | 0        | 0        | 0        | 0        | 0        | 0        | 5.71E-04 | 0        | 0        | 0        | 0        | 0        |
| 0        | 0        | 0        | 0        | 0        | 0        | 0        | 0        | 0        | 0        | 0        | 0        | 0        |
| 0        | 0        | 0        | 0        | 5.40E-05 | 0        | 2.50E-05 | 0        | 0        | 0        | 0        | 3.12E-04 | 0        |
| 0        | 0        | 0        | 0        | 0        | 0        | 0        | 0        | 0        | 0.019206 | 0        | 0        | 0        |
| 5.32E-04 | 2.43E-04 | 0.002794 | 0.004971 | 0.011805 | 1.57E-04 | 5.00E-04 | 0.011958 | 0.015394 | 0.007086 | 0.005114 | 0.004079 | 0.00889  |

| CPR04    | CPR15    | CPR02    | CPR18    | CPR07    | SP23     | SP19     | SP24     | SP16     | SP15     | SP26     | SP02     | SP12     |
|----------|----------|----------|----------|----------|----------|----------|----------|----------|----------|----------|----------|----------|
| 0.252598 | 0.208159 | 0.082039 | 0.07697  | 0.00217  | 0.56084  | 0.430268 | 0.277642 | 0.276878 | 0.109043 | 0.037131 | 0.029651 | 0.02676  |
| 0.260411 | 9.20E-05 | 0        | 9.80E-04 | 0.001101 | 0.012803 | 0.518115 | 0.025688 | 0.142956 | 0.100064 | 0.002087 | 0.307867 | 0.002286 |
| 0        | 0.052738 | 0.290548 | 0.117753 | 0.011952 | 2.80E-05 | 0        | 2.25E-04 | 2.05E-04 | 8.51E-04 | 0.075262 | 1.12E-04 | 0.809878 |
| 0.014684 | 0.024986 | 0.150482 | 0.026633 | 2.52E-04 | 0.138673 | 9.20E-05 | 0.001604 | 0.047428 | 0.025862 | 0.001719 | 0.017947 | 0.035568 |
| 0.016878 | 0.1179   | 0.037986 | 0.058662 | 2.19E-04 | 6.14E-04 | 2.80E-05 | 2.05E-04 | 0.064312 | 0.039503 | 0.798652 | 0.015701 | 9.09E-04 |
| 6.40E-05 | 4.69E-04 | 1.41E-04 | 0        | 0.304995 | 9.10E-05 | 0        | 0.002696 | 3.10E-05 | 0.021108 | 0        | 7.90E-04 | 0        |
| 0.056869 | 3.70E-05 | 0        | 0.442157 | 0        | 0.001721 | 0        | 0        | 0.014302 | 0.015669 | 0        | 0.166789 | 0        |
| 0.051575 | 0        | 0        | 0        | 0.231163 | 0        | 0        | 0        | 0        | 4.89E-04 | 0        | 0        | 0        |
| 0        | 0        | 0        | 2.60E-05 | 7.40E-05 | 0.186616 | 0        | 0.563614 | 0        | 0        | 0        | 0        | 0        |
| 6.50E-05 | 2.16E-04 | 3.77E-04 | 0        | 2.60E-05 | 0.009708 | 8.52E-04 | 0.012034 | 6.00E-05 | 7.23E-04 | 6.53E-04 | 0.028988 | 0.005096 |
| 0.008082 | 2.20E-05 | 0.224479 | 0.005367 | 0        | 0.001571 | 0        | 0.001285 | 9.10E-05 | 0.011535 | 0.003647 | 6.70E-05 | 3.53E-04 |
| 0.140592 | 0        | 0.005869 | 2.29E-04 | 2.80E-05 | 0        | 0.046965 | 3.50E-05 | 2.50E-05 | 0        | 0        | 0        | 5.00E-05 |
| 0.019953 | 6.52E-04 | 0        | 0.00189  | 6.30E-05 | 4.14E-04 | 0        | 0        | 0.045146 | 0.384491 | 0.00263  | 0.017901 | 0.001553 |
| 6.11E-04 | 0.016715 | 1.50E-04 | 0.002318 | 2.50E-04 | 0.002329 | 3.20E-05 | 6.84E-04 | 0.14122  | 0.001963 | 0.030335 | 8.90E-05 | 0.084926 |
| 0.01202  | 0        | 0        | 0.032188 | 0.009553 | 3.29E-04 | 0        | 0        | 0.026438 | 0.050948 | 0        | 0.008895 | 0.023594 |
| 0        | 0        | 0.09424  | 0.094125 | 0        | 2.70E-05 | 0        | 0        | 0        | 1.90E-05 | 4.50E-05 | 2.70E-05 | 0        |
| 6.03E-04 | 0.004507 | 8.00E-05 | 3.23E-04 | 9.00E-05 | 3.60E-05 | 2.50E-05 | 0        | 0.001933 | 0.004457 | 7.30E-05 | 0.001519 | 0        |
| 6.64E-04 | 2.21E-04 | 0.001511 | 0.005788 | 0.424042 | 0        | 0        | 0        | 0        | 0        | 0.00213  | 0.001734 | 0        |
| 0.054164 | 1.94E-04 | 0        | 2.94E-04 | 5.54E-04 | 6.80E-05 | 0        | 0        | 3.02E-04 | 0.005528 | 0        | 0.004845 | 0        |
| 0.001209 | 3.56E-04 | 0.069631 | 0.006146 | 9.20E-05 | 3.89E-04 | 0        | 1.98E-04 | 6.57E-04 | 0.003093 | 2.80E-05 | 0.002636 | 0        |
| 7.73E-04 | 0.032381 | 0        | 0.001705 | 0.001107 | 2.80E-05 | 0        | 0        | 5.67E-04 | 0.025615 | 0.022527 | 0.02084  | 0        |
| 0.00355  | 0        | 3.07E-04 | 0        | 4.70E-05 | 0        | 0        | 3.39E-04 | 0.149435 | 0.046774 | 3.70E-05 | 9.79E-04 | 0        |
| 0.001823 | 0        | 0        | 0.042322 | 0        | 0.0013   | 0        | 0        | 0.007618 | 0.005135 | 0        | 0.006207 | 0        |
| 0        | 0        | 0        | 5.30E-05 | 0        | 8.90E-05 | 0        | 2.94E-04 | 0.002552 | 0.007122 | 0        | 0.004337 | 0        |
| 3.10E-05 | 6.14E-04 | 7.90E-05 | 2.10E-04 | 4.30E-05 | 0.016122 | 0        | 0.003522 | 3.39E-04 | 7.40E-05 | 8.80E-04 | 3.47E-04 | 1.27E-04 |
| 0        | 0.246431 | 0        | 0        | 0        | 0        | 0        | 0        | 3.60E-05 | 1.62E-04 | 0        | 0        | 0        |
| 0.005132 | 0.014638 | 0.001516 | 0.004553 | 9.10E-05 | 3.48E-04 | 0        | 0        | 0.007037 | 0.002437 | 2.50E-05 | 0.002689 | 8.00E-05 |
| 0        | 0.23687  | 0        | 0.022901 | 9.89E-04 | 5.10E-05 | 0        | 3.80E-05 | 0        | 0.003732 | 0        | 0.005305 | 0        |
| 0        | 4.30E-05 | 0        | 2.90E-05 | 0        | 0.015756 | 0        | 0.001113 | 0        | 1.30E-05 | 1.21E-04 | 2.37E-04 | 1.76E-04 |
| 0.005446 | 6.42E-04 | 2.07E-04 | 7.30E-05 | 0.00272  | 3.40E-05 | 0        | 0        | 0.006699 | 0.003799 | 0        | 0.017152 | 0        |
| 0.004056 | 0        | 0.005877 | 6.10E-05 | 0        | 1.72E-04 | 0        | 0        | 0.006201 | 0.005501 | 4.20E-05 | 0.005406 | 0        |
| 4.34E-04 | 0.006477 | 3.00E-05 | 4.69E-04 | 7.68E-04 | 4.44E-04 | 0        | 0.040213 | 0        | 0        | 3.50E-05 | 0.086484 | 1.58E-04 |
| 0        | 0        | 0.003746 | 5.70E-05 | 1.00E-04 | 0        | 0        | 0        | 3.20E-05 | 0        | 0        | 0.189238 | 0        |
| 9.39E-04 | 0.004111 | 0        | 0.033568 | 0.002761 | 0        | 0        | 0        | 0.001324 | 0.002047 | 1.30E-05 | 8.98E-04 | 0        |
| 1.23E-04 | 3.10E-05 | 1.00E-04 | 0.001034 | 3.30E-05 | 0.012781 | 1.46E-04 | 0.044148 | 4.97E-04 | 0.001084 | 0.001424 | 6.18E-04 | 3.76E-04 |
| 0.001262 | 0.001901 | 3.00E-04 | 0.001669 | 1.80E-05 | 0.001093 | 0        | 0        | 0.003495 | 0.007016 | 2.00E-05 | 3.09E-04 | 0        |
| 0        | 0        | 1.79E-04 | 1.96E-04 | 1.00E-04 | 0.008362 | 0        | 0.012146 | 0.009209 | 0.005257 | 0        | 2.58E-04 | 0        |
| 0        | 0        | 1.18E-04 | 0.006522 | 1.90E-05 | 0        | 0        | 0        | 0.003802 | 1.92E-04 | 4.80E-05 | 0.002338 | 0        |
| 0.007442 | 4.20E-05 | 0        | 3.99E-04 | 0        | 1.43E-04 | 0        | 3.70E-05 | 0.008198 | 0.029967 | 1.46E-04 | 0.033106 | 6.53E-04 |
| 0        | 0        | 0        | 0        | 2.10E-05 | 0        | 0.002068 | 0        | 0        | 0        | 0.011677 | 5.80E-05 | 0        |
| 0.035201 | 0        | 0        | 2.80E-05 | 0        | 0        | 0        | 0        | 1.58E-04 | 0.001349 | 0        | 3.10E-04 | 3.70E-05 |
| 0.023282 | 0        | 0        | 0        | 0        | 0        | 0        | 0        | 7.41E-04 | 7.30E-05 | 8.14E-04 | 0.001265 | 0        |
| 7.87E-04 | 0        | 0        | 0        | 0        | 5.29E-04 | 0        | 0        | 0.014902 | 0.009507 | 2.20E-05 | 0.004097 | 0        |
| 0        | 0        | 0.007153 | 1.05E-04 | 0        | 0        | 0        | 0        | 0.001088 | 5.86E-04 | 3.10E-05 | 0.00408  | 0        |
| 0        | 0        | 3.40E-05 | 0        | 0        | 1.45E-04 | 0        | 2.33E-04 | 0        | 0        | 1.32E-04 | 0        | 1.13E-04 |
| 0.004426 | 0.001541 | 0.00532  | 9.73E-04 | 7.20E-05 | 6.20E-05 | 0        | 0        | 7.32E-04 | 0.003782 | 0        | 6.06E-04 | 0.001666 |
| 0.00101  | 6.95E-04 | 0        | 2.90E-05 | 0        | 0        | 0        | 0        | 0        | 0        | 0        | 0        | 0        |
| 0        | 0        | 0        | 0        | 0        | 0        | 0        | 0        | 0        | 3.00E-05 | 0        | 0        | 0        |
| 0        | 0        | 0        | 0        | 0        | 0        | 0        | 0        | 0        | 2.30E-04 | 0        | 0        | 0        |
| 0.002926 | 0        | 0        | 0        | 0        | 0        | 0        | 0        | 0        | 0.002344 | 0        | 0        | 0        |
| 3.04E-04 | 0        | 0        | 2.50E-05 | 1.90E-05 | 0.001056 | 0        | 0        | 4.86E-04 | 0.001027 | 0        | 1.70E-05 | 0        |
| 0        | 0        | 1.21E-04 | 0        | 0        | 0        | 0        | 9.30E-05 | 0        | 1.01E-04 | 0        | 0        | 0        |
| 0        | 3.60E-05 | 0.014705 | 0.005634 | 0        | 0        | 0        | 0        | 0        | 0        | 0        | 0        | 5.60E-05 |
| 2.60E-05 | 0        | 2.90E-05 | 0        | 0        | 0.005579 | 2.50E-05 | 2.59E-04 | 0        | 2.70E-05 | 3.40E-05 | 2.20E-05 | 5.40E-05 |
| 1.22E-04 | 5.26E-04 | 1.35E-04 | 6.50E-05 | 0        | 0.006346 | 1.40E-04 | 3.00E-05 | 8.90E-05 | 2.80E-05 | 0.001045 | 9.34E-04 | 1.74E-04 |
| 0        | 0        | 0        | 0        | 0        | 0        | 0        | 0        | 5.10E-04 | 0.00182  | 0        | 0        | 0        |
| 4.94E-04 | 0        | 0        | 0        | 0        | 6.00E-05 | 0        | 0        | 0.001864 | 0.007111 | 2.10E-05 | 5.05E-04 | 0        |
| 0        | 1.01E-04 | 1.30E-05 | 0        | 0        | 4.00E-04 | 3.20E-05 | 0.002281 | 1.16E-04 | 0        | 1.89E-04 | 7.70E-05 | 0        |
| 1.80E-05 | 0        | 1.90E-05 | 6.00E-05 | 0        | 0.001179 | 1.17E-04 | 0.001554 | 7.00E-05 | 1.11E-04 | 4.55E-04 | 6.10E-05 | 1.09E-04 |
| 0.001938 | 0.010362 | 0        | 0        | 0        | 3.90E-05 | 3.00E-05 | 3.30E-05 | 0        | 0        | 0        | 7.84E-04 | 9.90E-05 |
| 0        | 0        | 0        | 0        | 0        | 0        | 0        | 0        | 0        | 8.00E-05 | 0        | 0        | 2.30E-05 |
| 0        | 1.82E-04 | 2.90E-05 | 2.70E-05 | 0        | 0.001716 | 1.24E-04 | 9.19E-04 | 2.05E-04 | 6.90E-05 | 8.92E-04 | 1.47E-04 | 4.00E-04 |
| 0        | 0        | 0        | 0        | 0        | 0        | 0        | 0        | 0.001144 | 0.016286 | 0        | 9.80E-05 | 0        |
| 0        | 0        | 0        | 0        | 2.48E-04 | 0        | 0        | 0        | 0        | 0        | 0        | 0        | 0        |
| 0        | 7.70E-05 | 4.79E-04 | 0.001239 | 1.81E-04 | 0        | 0        | 0        | 0        | 0        | 0        | 0        | 6.10E-05 |
| 6.50E-05 | 0        | 0        | 0        | 0        | 0        | 0        | 0        | 0.002458 | 0.005653 | 0        | 0        | 0        |
| 0        | 0        | 0        | 0        | 0        | 0        | 0        | 0        | 0        | 0        | 0        | 0        | 0        |
| 0.007348 | 0.015035 | 0.001971 | 0.004145 | 0.004039 | 0.009909 | 9.41E-04 | 0.006838 | 0.006412 | 0.028513 | 0.004978 | 0.004633 | 0.004665 |

| SP27     | SP10     | SP14     | SP09     | SP22     | SP06     | SP08     | SP13     | SP21     | SP04     | SP03     | SP18     | SP05     |
|----------|----------|----------|----------|----------|----------|----------|----------|----------|----------|----------|----------|----------|
| 0.021362 | 0.013363 | 0.01069  | 0.010519 | 0.007876 | 0.004832 | 0.004587 | 0.002894 | 0.002724 | 0.00111  | 8.13E-04 | 3.68E-04 | 1.69E-04 |
| 0.334475 | 3.97E-04 | 1.46E-04 | 0.252137 | 0.653551 | 0.528367 | 0.434077 | 0.763194 | 0.545038 | 0.123773 | 0.968085 | 0.1251   | 0.889834 |
| 0.241992 | 0.00242  | 0.062224 | 0.004317 | 1.50E-05 | 0.074085 | 0.064034 | 8.12E-04 | 0.001354 | 0        | 0        | 0.004717 | 0        |
| 0.121436 | 0.759714 | 0.073805 | 0.036737 | 2.40E-05 | 0.013594 | 0.010711 | 0.001944 | 0.016848 | 0.162979 | 5.60E-05 | 0.21538  | 0        |
| 0.140178 | 0.004799 | 0.23571  | 0.063383 | 0        | 0.200187 | 0.31292  | 0.029934 | 0.167503 | 0.059735 | 5.10E-05 | 0.273129 | 2.80E-05 |
| 0        | 0        | 0        | 0        | 0        | 0        | 0        | 0.045477 | 0        | 0        | 0        | 0        | 0        |
| 3.80E-05 | 0.041543 | 0.138197 | 0.34584  | 0        | 0.031942 | 0.048119 | 0.051932 | 0        | 0.258538 | 2.40E-05 | 0.094353 | 0        |
| 0        | 0        | 0.021519 | 0        | 0        | 0        | 0        | 0        | 1.49E-04 | 0        | 6.10E-05 | 0        | 0        |
| 0        | 0.002112 | 0        | 0        | 0        | 3.16E-04 | 2.73E-04 | 0        | 0        | 0        | 0        | 0        | 0        |
| 1.13E-04 | 0.017627 | 0.001677 | 2.51E-04 | 4.20E-05 | 2.90E-04 | 2.55E-04 | 2.95E-04 | 4.63E-04 | 6.75E-04 | 1.09E-04 | 8.78E-04 | 4.80E-05 |
| 1.21E-04 | 3.14E-04 | 0        | 0        | 0        | 9.60E-05 | 1.97E-04 | 0.004015 | 0        | 0        | 0        | 0        | 5.00E-05 |
| 0        | 0        | 0        | 1.32E-04 | 0        | 0.007995 | 0.004926 | 8.40E-05 | 0        | 8.74E-04 | 0        | 0        | 1.87E-04 |
| 0.0842   | 3.57E-04 | 0.008044 | 0.033726 | 5.70E-05 | 3.40E-05 | 1.56E-04 | 0.054846 | 0.051795 | 0.003271 | 0.00371  | 0.001406 | 0.001294 |
| 0.002601 | 0.019617 | 0.258369 | 2.44E-04 | 0.332769 | 0.051693 | 0.051733 | 4.70E-05 | 0.003362 | 8.46E-04 | 0.005793 | 1.18E-04 | 0.072317 |
| 0        | 0.101183 | 6.51E-04 | 0.007735 | 0        | 2.26E-04 | 4.89E-04 | 0.004099 | 0.008465 | 0.023521 | 0        | 0.017129 | 0        |
| 0.003212 | 1.80E-04 | 0        | 0.003101 | 0        | 7.80E-05 | 7.40E-05 | 5.30E-05 | 0        | 0        | 0        | 0        | 0        |
| 4.60E-05 | 3.10E-05 | 0.005942 | 0.004664 | 0        | 1.19E-04 | 2.73E-04 | 2.83E-04 | 9.63E-04 | 0.021054 | 0        | 0.065108 | 3.10E-05 |
| 0        | 0        | 2.74E-04 | 0        | 0.001668 | 2.60E-05 | 0        | 3.30E-05 | 0        | 0        | 2.81E-04 | 0        | 0        |
| 0        | 0        | 0.019058 | 0.041009 | 0        | 0        | 0        | 0.00112  | 0.008023 | 0.027512 | 0        | 0.002007 | 0        |
| 3.70E-05 | 0.001208 | 0.015889 | 0.001959 | 0        | 0.014784 | 0.018683 | 7.40E-04 | 4.81E-04 | 6.53E-04 | 0        | 0.00144  | 0        |
| 0.001177 | 0        | 0.018966 | 0.015949 | 2.20E-05 | 0        | 0        | 0        | 2.21E-04 | 2.60E-05 | 0        | 0.006355 | 0        |
| 0.005705 | 0        | 0        | 0.004323 | 2.10E-05 | 0        | 0        | 0.002418 | 6.10E-05 | 5.90E-05 | 0        | 0        | 0        |
| 0.001103 | 7.13E-04 | 0.022225 | 0.012985 | 0        | 0.010218 | 0.016101 | 0.009612 | 2.37E-04 | 0.154422 | 0        | 0.001744 | 7.60E-05 |
| 0        | 0.009522 | 0.007683 | 0.010757 | 0        | 0        | 0        | 2.64E-04 | 0.074496 | 0.040855 | 0.007071 | 0.007514 | 0        |
| 2.40E-04 | 0.002636 | 0.002142 | 7.20E-05 | 0.001945 | 5.90E-04 | 4.70E-04 | 2.70E-05 | 0        | 6.79E-04 | 0        | 2.60E-05 | 0        |
| 0        | 0        | 0.002542 | 5.20E-04 | 0        | 0        | 2.00E-05 | 0        | 0        | 0        | 0        | 0        | 0        |
| 0.001443 | 3.30E-04 | 0.012722 | 0.015174 | 0        | 8.23E-04 | 0.001579 | 0.007448 | 0.002936 | 0.009073 | 0        | 0.058026 | 0        |
| 0        | 0.001327 | 0.003362 | 0.012088 | 0        | 0        | 0        | 0        | 0        | 0        | 0        | 0.032743 | 0        |
| 3.70E-05 | 9.26E-04 | 0        | 3.00E-05 | 6.90E-05 | 8.10E-05 | 2.09E-04 | 2.70E-05 | 1.06E-04 | 1.90E-05 | 0        | 0        | 0        |
| 0        | 0        | 0.004316 | 0.012317 | 0        | 2.63E-04 | 2.76E-04 | 0.001522 | 0.024341 | 0.006712 | 0        | 0.017398 | 0        |
| 4.00E-05 | 7.30E-05 | 0.010393 | 0.008321 | 2.70E-05 | 0.01145  | 0.009572 | 0.00187  | 0.038727 | 0.06182  | 0        | 0.061308 | 0        |
| 0        | 1.63E-04 | 0        | 4.62E-04 | 0        | 2.80E-05 | 1.60E-05 | 3.80E-05 | 0        | 0        | 0        | 1.09E-04 | 0        |
| 0        | 0        | 0        | 0        | 0        | 0        | 0        | 0        | 0        | 0        | 0        | 0.001426 | 0        |
| 0.006463 | 0        | 0.024039 | 3.34E-04 | 0        | 0        | 0        | 8.28E-04 | 0.024415 | 6.59E-04 | 0        | 5.48E-04 | 0        |
| 3.60E-05 | 3.75E-04 | 0.002777 | 1.15E-04 | 0.001021 | 0.032705 | 0.003035 | 3.70E-04 | 7.77E-04 | 0.00636  | 4.23E-04 | 6.72E-04 | 7.30E-04 |
| 0.001185 | 0.001125 | 0.009511 | 0.002625 | 1.13E-04 | 0.002948 | 0.002436 | 0.0011   | 0.002635 | 0.003038 | 4.72E-04 | 4.71E-04 | 5.20E-05 |
| 0        | 4.87E-04 | 0        | 5.70E-05 | 0        | 0        | 0        | 0        | 3.20E-05 | 0.0012   | 0        | 0        | 0        |
| 0.002491 | 4.09E-04 | 8.78E-04 | 9.32E-04 | 0        | 4.15E-04 | 4.19E-04 | 1.90E-05 | 0        | 3.63E-04 | 3.60E-05 | 2.10E-05 | 0        |
| 0.010889 | 0        | 0.007236 | 0.012285 | 0        | 0        | 0        | 0.004432 | 0        | 0.006038 | 0        | 7.06E-04 | 0        |
| 0        | 0        | 0        | 0        | 7.10E-05 | 1.28E-04 | 2.29E-04 | 0        | 0        | 9.40E-05 | 0        | 9.30E-05 | 0        |
| 0        | 0        | 3.87E-04 | 0.077572 | 0        | 4.00E-05 | 0        | 1.18E-04 | 0        | 0.012282 | 0        | 0        | 0        |
| 0        | 0        | 0        | 0        | 2.20E-05 | 0        | 0        | 0        | 0        | 0        | 0        | 3.48E-04 | 0        |
| 2.65E-04 | 0        | 2.10E-04 | 0        | 0        | 5.50E-05 | 0        | 8.38E-04 | 1.40E-04 | 3.70E-05 | 0        | 1.90E-05 | 0        |
| 0        | 1.30E-04 | 0        | 0        | 0        | 0        | 0        | 5.00E-05 | 1.14E-04 | 0        | 2.60E-05 | 0        | 0        |
| 0        | 5.61E-04 | 0        | 3.10E-05 | 0        | 6.40E-05 | 3.50E-05 | 3.00E-05 | 5.00E-05 | 1.01E-04 | 0        | 0        | 0        |
| 4.10E-05 | 0        | 5.51E-04 | 2.05E-04 | 1.31E-04 | 2.90E-05 | 8.10E-05 | 1.92E-04 | 4.10E-05 | 0        | 4.30E-05 | 3.19E-04 | 4.80E-05 |
| 0        | 0.00103  | 0.002461 | 3.00E-05 | 0        | 0        | 0        | 0        | 0.008314 | 0        | 0        | 0        | 0        |
| 0        | 0        | 0        | 0        | 0        | 0        | 0        | 0        | 0        | 0        | 0        | 0        | 0        |
| 0        | 0        | 0        | 0        | 0        | 0        | 0        | 0        | 0        | 0        | 0        | 0        | 0        |
| 0        | 0        | 0        | 0        | 0        | 3.20E-05 | 0        | 0        | 0        | 1.14E-04 | 0        | 0        | 0        |
| 0        | 9.09E-04 | 0.001703 | 0        | 0        | 0        | 0        | 0        | 5.60E-05 | 0        | 0        | 0        | 0        |
| 0        | 0        | 0        | 0        | 0        | 0        | 0        | 0        | 0        | 0        | 0.012697 | 0        | 0.034315 |
| 2.73E-04 | 0        | 0        | 2.40E-05 | 0        | 0        | 0        | 0        | 0        | 0        | 0        | 0        | 0        |
| 0        | 3.50E-05 | 0        | 0        | 0        | 2.55E-04 | 1.13E-04 | 2.60E-05 | 2.30E-05 | 0        | 0        | 0        | 0        |
| 3.60E-05 | 5.48E-04 | 0.005996 | 2.27E-04 | 0        | 8.93E-04 | 9.22E-04 | 3.30E-05 | 8.70E-05 | 4.52E-04 | 0        | 2.20E-04 | 2.20E-05 |
| 1.17E-04 | 0        | 0        | 0        | 0        | 0        | 0        | 0        | 0        | 2.00E-05 | 0        | 0        | 0        |
| 0.002645 | 0        | 0        | 0        | 0        | 0        | 0        | 1.43E-04 | 0        | 9.40E-05 | 0        | 0        | 0        |
| 0        | 0.00215  | 2.83E-04 | 6.40E-05 | 0        | 2.33E-04 | 9.90E-05 | 0        | 5.00E-05 | 1.56E-04 | 0        | 0        | 0        |
| 0        | 4.50E-05 | 2.59E-04 | 0        | 3.17E-04 | 0.001744 | 1.40E-04 | 1.90E-05 | 2.30E-05 | 7.84E-04 | 2.20E-05 | 0        | 1.36E-04 |
| 0        | 0        | 1.25E-04 | 9.60E-05 | 0        | 0        | 0        | 0        | 0        | 0        | 0        | 9.13E-04 | 0        |
| 0        | 8.60E-05 | 6.80E-05 | 0        | 0        | 0        | 0        | 0        | 0        | 3.60E-05 | 0        | 0        | 0        |
| 0        | 3.46E-04 | 6.43E-04 | 0        | 0        | 3.80E-04 | 4.00E-04 | 0        | 1.71E-04 | 4.90E-05 | 2.70E-05 | 0        | 0        |
| 0        | 0        | 0        | 3.10E-05 | 0        | 0        | 0        | 7.06E-04 | 0        | 2.20E-05 | 0        | 0        | 0        |
| 0        | 0        | 0        | 0        | 0        | 0        | 0        | 0        | 0        | 0        | 0        | 0        | 0        |
| 0        | 0        | 0        | 0        | 0        | 0        | 0        | 0        | 0        | 0        | 0        | 3.20E-05 | 0        |
| 0        | 3.00E-05 | 0        | 0        | 0        | 0        | 0        | 2.65E-04 | 0        | 7.88E-04 | 0        | 0        | 0        |
| 0        | 0        | 0        | 0        | 0        | 0        | 0        | 0        | 0        | 0        | 0        | 0        | 0        |
| 0.016003 | 0.011179 | 0.006327 | 0.00662  | 2.39E-04 | 0.007962 | 0.012341 | 0.005803 | 0.014779 | 0.009107 | 2.00E-04 | 0.007856 | 6.63E-04 |

| SP25     | SP20     | SPR18    | SPR11    | SPR19    | SPR07    | SPR21    | SPR22    | SPR14    | SPR09    | SPR23    | SPR20    | SPR17    |
|----------|----------|----------|----------|----------|----------|----------|----------|----------|----------|----------|----------|----------|
| 1.38E-04 | 1.70E-05 | 0.76367  | 0.729076 | 0.595279 | 0.539103 | 0.473281 | 0.406788 | 0.395821 | 0.304808 | 0.181673 | 0.127876 | 0.092002 |
| 0.831403 | 8.00E-05 | 0.00125  | 0.153235 | 0.005601 | 0.005715 | 2.90E-05 | 0.046084 | 0        | 0.007989 | 0        | 0        | 0.001448 |
| 2.39E-04 | 2.80E-05 | 8.00E-05 | 0.001662 | 0.003679 | 0        | 1.04E-04 | 0.00862  | 4.80E-05 | 0.120106 | 2.80E-05 | 0.069577 | 0.213942 |
| 0.012807 | 0.891222 | 0.015463 | 0.039758 | 0.006655 | 0.022101 | 0.039233 | 0.00471  | 3.63E-04 | 0.139764 | 0.315408 | 0.130526 | 0.045684 |
| 0.019656 | 1.99E-04 | 0.008632 | 5.30E-05 | 1.70E-04 | 0.004526 | 0.102764 | 0.022178 | 0.011808 | 0.1562   | 0.431569 | 0.046546 | 0.041455 |
| 1.80E-05 | 0        | 0.055262 | 7.50E-05 | 0.123428 | 0        | 0        | 0.033057 | 0        | 0        | 0        | 6.90E-05 | 0        |
| 0.083038 | 1.10E-05 | 0.003118 | 7.80E-05 | 9.80E-05 | 0.060602 | 2.90E-05 | 0.078115 | 2.30E-05 | 0        | 4.37E-04 | 0.009656 | 0.148217 |
| 0.013171 | 0        | 1.33E-04 | 8.50E-05 | 0        | 0.00551  | 0        | 0.005089 | 0.40679  | 0        | 0        | 4.50E-04 | 1.50E-04 |
| 0        | 0        | 0        | 1.71E-04 | 0        | 0        | 0        | 0        | 0        | 7.50E-05 | 0        | 0        | 0        |
| 2.16E-04 | 0.012142 | 1.29E-04 | 3.20E-05 | 3.00E-05 | 2.90E-05 | 2.68E-04 | 0        | 3.25E-04 | 8.60E-05 | 7.80E-04 | 2.21E-04 | 1.21E-04 |
| 7.10E-05 | 0        | 0.009986 | 6.10E-05 | 0.051359 | 0.015823 | 0        | 0.011406 | 0        | 0        | 0        | 0.292368 | 0.041673 |
| 0.01985  | 3.70E-05 | 2.20E-04 | 0.002524 | 0        | 0.200433 | 0        | 0        | 7.50E-05 | 2.10E-05 | 0        | 3.14E-04 | 2.80E-05 |
| 3.69E-04 | 4.50E-05 | 0.074262 | 0.001506 | 0.005416 | 0.037681 | 0        | 0.105013 | 9.81E-04 | 9.12E-04 | 1.80E-05 | 0.001124 | 0.001465 |
| 1.01E-04 | 0.010714 | 3.70E-05 | 0        | 3.68E-04 | 0        | 4.23E-04 | 1.63E-04 | 0.010208 | 0.003904 | 0.02036  | 9.98E-04 | 5.34E-04 |
| 0        | 0        | 2.36E-04 | 6.10E-05 | 0        | 0        | 9.10E-05 | 6.43E-04 | 0        | 0.012172 | 1.40E-05 | 4.00E-05 | 0        |
| 0        | 0        | 0        | 0        | 0        | 2.75E-04 | 0.181282 | 6.30E-04 | 7.40E-05 | 0.071039 | 3.04E-04 | 0.204903 | 0.219339 |
| 0        | 0        | 5.95E-04 | 0        | 0        | 3.48E-04 | 0.00168  | 2.48E-04 | 1.45E-04 | 0.005448 | 0.004908 | 0.007759 | 8.46E-04 |
| 0        | 0        | 3.40E-05 | 2.70E-05 | 0.199097 | 0.013087 | 3.20E-05 | 0        | 0        | 0        | 2.60E-05 | 2.64E-04 | 5.90E-05 |
| 0        | 0        | 0.00552  | 0        | 3.70E-05 | 0.030006 | 5.85E-04 | 0.174018 | 0.001745 | 0.010955 | 0        | 0        | 5.46E-04 |
| 0.002646 | 3.00E-05 | 4.99E-04 | 0        | 3.00E-05 | 8.25E-04 | 0.171113 | 0.013861 | 6.70E-05 | 0.114345 | 0.011664 | 0.047834 | 0.005716 |
| 3.90E-05 | 0.003594 | 1.55E-04 | 0.002337 | 6.87E-04 | 1.84E-04 | 0        | 0        | 0.001658 | 7.11E-04 | 0        | 0.002248 | 0        |
| 0        | 0        | 0.027854 | 0        | 0        | 0.001923 | 0        | 0.011893 | 0        | 5.41E-04 | 0        | 0        | 0.002712 |
| 9.25E-04 | 0        | 0.001049 | 0        | 0        | 0.002184 | 0        | 0.001572 | 0        | 0        | 0        | 7.30E-05 | 0.033935 |
| 5.40E-05 | 0        | 0.001063 | 0        | 0        | 0.001043 | 0        | 0        | 0        | 0        | 2.60E-05 | 5.50E-05 | 0.010169 |
| 3.47E-04 | 0.001783 | 6.40E-05 | 3.40E-05 | 2.90E-05 | 0        | 6.80E-05 | 0        | 1.80E-05 | 0        | 5.50E-05 | 1.89E-04 | 9.70E-05 |
| 0        | 0        | 0.001133 | 0        | 0        | 0.003613 | 0        | 8.84E-04 | 0.13908  | 0.001123 | 0        | 2.20E-05 | 0.014947 |
| 2.41E-04 | 9.72E-04 | 0.001824 | 6.18E-04 | 0        | 0.003587 | 0.003051 | 0.013146 | 2.04E-04 | 0.008262 | 0.002636 | 0.001858 | 0.012872 |
| 0        | 0.045794 | 0        | 0.001227 | 1.02E-04 | 0        | 0        | 0        | 0.004524 | 0        | 0        | 0.003123 | 0        |
| 5.00E-05 | 0.001393 | 9.00E-05 | 3.30E-05 | 6.10E-05 | 0        | 6.90E-05 | 0        | 6.00E-05 | 0        | 1.30E-04 | 1.32E-04 | 0        |
| 1.31E-04 | 1.40E-05 | 0.003153 | 0        | 0        | 0.014629 | 1.99E-04 | 0.009605 | 1.79E-04 | 0.001093 | 0        | 0        | 0.035078 |
| 0        | 1.20E-05 | 0.003818 | 0        | 0        | 9.90E-04 | 0.001402 | 4.06E-04 | 0        | 0.007098 | 0.003075 | 4.10E-05 | 0.005008 |
| 2.20E-05 | 0.019775 | 2.70E-05 | 0.037036 | 3.20E-05 | 0        | 4.10E-05 | 1.09E-04 | 0.007149 | 0        | 1.01E-04 | 3.00E-05 | 1.36E-04 |
| 0        | 0        | 0        | 0        | 0        | 3.20E-05 | 0        | 0        | 0        | 0        | 0        | 0        | 0        |
| 2.60E-05 | 0        | 7.10E-05 | 0.027229 | 0        | 1.29E-04 | 6.70E-05 | 4.88E-04 | 0        | 0.003873 | 0        | 0.008098 | 0.001266 |
| 0.002692 | 5.60E-04 | 3.00E-05 | 5.70E-05 | 2.80E-05 | 0        | 6.30E-05 | 0        | 5.75E-04 | 0.001099 | 6.22E-04 | 0.001483 | 5.20E-05 |
| 0.00173  | 0        | 0.001188 | 1.13E-04 | 0        | 4.15E-04 | 0.001399 | 0.002281 | 1.47E-04 | 0.002595 | 1.78E-04 | 0.002229 | 6.29E-04 |
| 0        | 0        | 0.003627 | 5.80E-05 | 0.002243 | 0.001466 | 0        | 6.04E-04 | 0        | 5.48E-04 | 0        | 3.30E-05 | 5.21E-04 |
| 2.20E-05 | 0        | 0.002586 | 0        | 0.001867 | 6.26E-04 | 0        | 0        | 1.52E-04 | 1.23E-04 | 0        | 0.001167 | 0.001481 |
| 4.90E-05 | 0        | 0        | 0        | 0        | 0.001397 | 0        | 0.008421 | 0        | 0        | 0        | 0        | 7.16E-04 |
| 0        | 0        | 0        | 0.001447 | 0        | 0        | 4.89E-04 | 0        | 0.005899 | 0        | 7.92E-04 | 0        | 0        |
| 0        | 0        | 0        | 0        | 0        | 0        | 0        | 0        | 0        | 6.30E-04 | 0        | 0        | 0.003561 |
| 0        | 0        | 0.001987 | 0        | 0.001168 | 0.006167 | 0        | 8.84E-04 | 1.50E-05 | 0        | 0        | 0        | 3.02E-04 |
| 0        | 0        | 0.001454 | 9.00E-05 | 0        | 8.60E-05 | 0        | 0.008275 | 0        | 0        | 0        | 0        | 0.008493 |
| 0        | 0        | 0.004394 | 0        | 0.00197  | 4.64E-04 | 0.007988 | 0        | 2.80E-05 | 0.012648 | 0.01747  | 0.006574 | 0.009868 |
| 0        | 0        | 3.30E-05 | 0        | 0        | 0        | 0        | 0        | 1.80E-05 | 0        | 2.20E-05 | 0        | 0        |
| 7.10E-05 | 0        | 0.001013 | 8.40E-05 | 2.70E-05 | 0.006863 | 0.013151 | 0.003712 | 0.003252 | 0.005112 | 0.006409 | 6.42E-04 | 0.003862 |
| 0        | 0        | 0        | 0        | 0        | 0        | 0        | 0.02228  | 0        | 0        | 0        | 0        | 0.001644 |
| 0        | 0        | 0        | 0        | 0        | 2.60E-05 | 0        | 0        | 0        | 0        | 0        | 0        | 0.004746 |
| 0        | 0        | 0        | 0        | 2.96E-04 | 0        | 0        | 0        | 0        | 0        | 0        | 0        | 0        |
| 0        | 0        | 0        | 0        | 0        | 0        | 0        | 0        | 0        | 0        | 0        | 0        | 0        |
| 0        | 0        | 0        | 0        | 0        | 0.001358 | 0        | 0        | 0        | 0        | 0        | 0        | 4.00E-04 |
| 0        | 0        | 0        | 0        | 0        | 0        | 0        | 0        | 0        | 0        | 0        | 0        | 0        |
| 0        | 0        | 0        | 0        | 0        | 0        | 0        | 0        | 0        | 0.003124 | 0        | 0.004229 | 0.027356 |
| 1.52E-04 | 5.20E-04 | 0        | 0        | 0        | 0        | 0        | 0        | 0        | 0        | 0        | 0        | 0        |
| 0.001163 | 0        | 0        | 0        | 0        | 0        | 2.24E-04 | 0        | 1.82E-04 | 3.28E-04 | 5.60E-05 | 0.002099 | 1.26E-04 |
| 0        | 0        | 0.001177 | 0        | 0        | 0.004415 | 0        | 0.001454 | 0        | 0        | 0        | 1.87E-04 | 3.69E-04 |
| 3.00E-05 | 0        | 0.001013 | 0        | 0        | 9.48E-04 | 0        | 0        | 0        | 4.78E-04 | 0        | 0        | 0.001028 |
| 0        | 0.00137  | 3.00E-05 | 0        | 3.00E-05 | 0        | 2.40E-05 | 0        | 2.50E-05 | 7.60E-05 | 4.26E-04 | 3.30E-05 | 3.70E-05 |
| 4.70E-04 | 1.13E-04 | 0        | 3.10E-05 | 0        | 0        | 0        | 0        | 1.13E-04 | 9.70E-05 | 4.50E-05 | 4.21E-04 | 6.50E-05 |
| 0        | 0        | 0        | 4.98E-04 | 3.40E-05 | 3.00E-05 | 4.30E-05 | 0        | 7.50E-05 | 0        | 0        | 0        | 0        |
| 0        | 0        | 0        | 0        | 0        | 0        | 0        | 0        | 0        | 0        | 0        | 3.50E-05 | 0        |
| 5.60E-05 | 0        | 0        | 0        | 0        | 0        | 7.60E-05 | 0        | 1.20E-04 | 0        | 1.31E-04 | 7.80E-05 | 3.20E-05 |
| 0        | 0        | 9.50E-05 | 0        | 0        | 0        | 0        | 0        | 0        | 0        | 0        | 0        | 4.70E-05 |
| 0        | 0        | 0        | 0        | 0        | 5.80E-05 | 0        | 0        | 0        | 3.54E-04 | 0        | 0.016864 | 0        |
| 0        | 0        | 0        | 0        | 0        | 0        | 0        | 0        | 0        | 0        | 0        | 1.01E-04 | 2.30E-05 |
| 1.17E-04 | 0        | 0        | 0        | 0        | 0        | 0        | 0        | 0        | 0        | 0        | 0        | 0        |
| 0        | 0        | 0        | 0        | 0        | 0        | 0        | 0        | 0        | 0        | 0        | 0        | 0        |
| 0.00789  | 0.009575 | 0.001946 | 7.04E-04 | 1.79E-04 | 0.011303 | 7.32E-04 | 0.003363 | 0.008054 | 0.002263 | 6.37E-04 | 0.007431 | 0.005197 |

| SPR01    | SPR08    | SPR03    | SPR04    | SPR10    | SPR06    | SPR02    | SPR05    | SPR13    | SPR15    | SPR16    | SPR12    |
|----------|----------|----------|----------|----------|----------|----------|----------|----------|----------|----------|----------|
| 0.06181  | 0.048103 | 0.041039 | 0.018549 | 0.015276 | 0.014614 | 0.012515 | 0.009527 | 0.009062 | 0.008686 | 0.006564 | 0.004177 |
| 0.015572 | 0.154249 | 0.077158 | 0.060574 | 0.033291 | 0.004451 | 0.120634 | 0        | 0.054402 | 0.012574 | 1.26E-04 | 0.357214 |
| 9.55E-04 | 0.184034 | 0        | 0.045341 | 0        | 0.408001 | 0.001661 | 0.015947 | 0.650341 | 2.38E-04 | 0        | 8.30E-05 |
| 0.111896 | 0.054917 | 0.208372 | 0.027295 | 0.087342 | 0.348096 | 0.046491 | 0.055656 | 0.103572 | 0.028228 | 0.330336 | 0.137606 |
| 0.04035  | 0.019396 | 0.240308 | 0.035897 | 0.135903 | 0.039964 | 0.212865 | 0.044844 | 0.093363 | 0.043099 | 0.026134 | 0.044286 |
| 0.001468 | 0        | 8.60E-05 | 0.194233 | 0        | 0        | 0        | 0        | 4.80E-05 | 5.30E-05 | 0        | 0        |
| 0.185658 | 0.05881  | 3.10E-05 | 0.0131   | 0.01169  | 7.40E-05 | 0.007833 | 1.04E-04 | 2.00E-05 | 0.023808 | 0        | 0.003327 |
| 0.006863 | 0        | 0.316748 | 0.312719 | 1.52E-04 | 6.20E-05 | 0        | 0.671375 | 7.40E-05 | 0.241172 | 0        | 0.311627 |
| 0        | 5.20E-05 | 0        | 0        | 0        | 0        | 0        | 0        | 0        | 0        | 0        | 0        |
| 0        | 1.51E-04 | 2.25E-04 | 0.002259 | 4.90E-05 | 0.001457 | 0.00317  | 2.98E-04 | 3.23E-04 | 8.60E-05 | 5.49E-04 | 1.77E-04 |
| 0.016555 | 4.80E-05 | 2.50E-05 | 0.010774 | 0.003978 | 0.005024 | 0.283932 | 0.029442 | 0        | 2.83E-04 | 0.384029 | 0.002503 |
| 0.267049 | 2.80E-05 | 9.40E-05 | 1.75E-04 | 0        | 2.95E-04 | 0        | 2.20E-05 | 0        | 0.512651 | 1.18E-04 | 0.003026 |
| 0.12323  | 0        | 0.003607 | 0.033381 | 1.53E-04 | 8.70E-05 | 0.001882 | 2.25E-04 | 0.034445 | 0.001148 | 4.99E-04 | 0.002992 |
| 2.16E-04 | 0.010995 | 0.026012 | 2.84E-04 | 0.053632 | 0.001749 | 0.008384 | 0.008194 | 0.007784 | 2.23E-04 | 0.005512 | 4.04E-04 |
| 0        | 0.355783 | 2.40E-05 | 0.147699 | 0.011998 | 0.017249 | 0.061192 | 6.86E-04 | 0.005699 | 2.66E-04 | 0        | 0        |
| 1.87E-04 | 1.25E-04 | 0.001234 | 0.001096 | 0        | 2.06E-04 | 0        | 0.001735 | 0.002053 | 3.88E-04 | 0.098925 | 0.001933 |
| 4.33E-04 | 0.037097 | 0        | 0.006761 | 0.087552 | 0.047595 | 0.064821 | 0.037839 | 1.70E-05 | 0.004448 | 0.042965 | 0.027325 |
| 5.20E-05 | 0        | 6.50E-04 | 3.45E-04 | 0        | 4.50E-05 | 0.001063 | 0.003654 | 0        | 0.016517 | 0        | 0        |
| 0.013884 | 0.003122 | 5.00E-05 | 0.028691 | 0.039453 | 2.11E-04 | 0.013923 | 8.74E-04 | 0.007156 | 0.011156 | 4.50E-05 | 0.0041   |
| 0.003571 | 7.58E-04 | 0.00495  | 0.001482 | 0.09551  | 0.060497 | 0.031367 | 0.025728 | 0.007809 | 0.002837 | 0.002315 | 0.001736 |
| 4.68E-04 | 0.005434 | 0        | 0.006381 | 0.006244 | 0.012137 | 8.30E-05 | 0.010516 | 0        | 0.009976 | 0        | 2.47E-04 |
| 0.014165 | 0        | 4.40E-05 | 6.97E-04 | 1.01E-04 | 0        | 1.10E-04 | 0        | 1.70E-05 | 0.001425 | 3.04E-04 | 0.001863 |
| 0.004316 | 0.013162 | 3.32E-04 | 1.66E-04 | 2.30E-05 | 0        | 0        | 4.70E-05 | 0        | 0.007519 | 5.79E-04 | 1.54E-04 |
| 0.001979 | 0        | 0.01734  | 0.017116 | 0.215115 | 0        | 8.70E-05 | 3.82E-04 | 0        | 4.00E-05 | 0        | 0.02715  |
| 0        | 4.70E-05 | 7.30E-05 | 1.86E-04 | 7.02E-04 | 1.65E-04 | 1.95E-04 | 4.34E-04 | 2.20E-05 | 0        | 1.43E-04 | 0        |
| 0.003545 | 0        | 2.40E-05 | 0.002226 | 0.105615 | 1.92E-04 | 0        | 0.047999 | 1.40E-05 | 3.30E-05 | 0        | 0        |
| 0.028175 | 0.003655 | 0.00181  | 0.004036 | 0.03938  | 0.01058  | 0.082613 | 0.004891 | 0.004309 | 0.007097 | 0.009295 | 0.010341 |
| 0        | 7.86E-04 | 0        | 7.90E-05 | 2.00E-05 | 0.002781 | 4.50E-05 | 0.011618 | 0        | 3.40E-05 | 0        | 0        |
| 0        | 0        | 7.40E-05 | 0        | 0        | 5.80E-05 | 1.05E-04 | 2.30E-05 | 0        | 0        | 0        | 0        |
| 0.013348 | 0.00106  | 2.40E-05 | 0.002471 | 0.011503 | 0.0023   | 0.006972 | 0.002702 | 0.0063   | 0.002593 | 2.05E-04 | 0.012598 |
| 0.004666 | 0.00833  | 2.41E-04 | 0.003632 | 0.017982 | 0.004541 | 0.003353 | 0.002068 | 1.78E-04 | 0.01138  | 0        | 0.025209 |
| 1.51E-04 | 0.014206 | 0        | 1.80E-04 | 0        | 0.001099 | 0.009397 | 3.53E-04 | 0.001557 | 5.10E-05 | 0        | 2.89E-04 |
| 0        | 0        | 0        | 0.002297 | 0        | 2.10E-05 | 0        | 0        | 1.90E-05 | 0        | 0        | 0        |
| 0.018418 | 0.009911 | 0.011872 | 0.001552 | 0.002122 | 4.80E-05 | 0.004104 | 0.001563 | 4.94E-04 | 0.003233 | 0.027137 | 0.003437 |
| 1.20E-04 | 0.003716 | 0.00225  | 3.42E-04 | 0.002631 | 0.001713 | 3.85E-04 | 5.55E-04 | 8.82E-04 | 2.64E-04 | 0        | 3.23E-04 |
| 0.003807 | 0.005109 | 0.003842 | 0.001865 | 0.01305  | 0.003357 | 0.001658 | 8.77E-04 | 4.88E-04 | 0.001518 | 3.70E-04 | 0.001283 |
| 0.001851 | 0        | 0.002002 | 9.80E-05 | 7.90E-05 | 0        | 4.39E-04 | 0        | 0        | 0        | 0.002418 | 3.23E-04 |
| 1.94E-04 | 8.22E-04 | 0        | 1.62E-04 | 1.21E-04 | 2.70E-05 | 0.001848 | 0        | 3.17E-04 | 4.96E-04 | 0.029788 | 1.44E-04 |
| 0.004302 | 0        | 0        | 0.007036 | 0        | 2.10E-05 | 4.83E-04 | 0        | 0        | 0        | 0        | 0        |
| 0        | 0        | 0        | 2.66E-04 | 0        | 0        | 4.30E-05 | 0        | 0        | 0        | 0        | 0        |
| 4.20E-04 | 0.00305  | 0        | 0        | 0        | 0        | 0        | 0        | 4.00E-05 | 0.002632 | 0        | 0        |
| 0.006708 | 0        | 0        | 8.30E-05 | 5.22E-04 | 1.36E-04 | 0        | 0        | 0        | 0.032033 | 0        | 0        |
| 0.012969 | 0        | 0        | 0        | 0        | 0        | 1.15E-04 | 0        | 0        | 0.002031 | 4.00E-05 | 0        |
| 6.13E-04 | 0        | 3.35E-04 | 2.54E-04 | 0.001762 | 0        | 8.62E-04 | 1.45E-04 | 0        | 7.10E-05 | 0.018054 | 7.19E-04 |
| 5.10E-05 | 0        | 1.01E-04 | 0        | 0        | 0        | 4.00E-05 | 0        | 0        | 0        | 0        | 3.60E-05 |
| 0.001055 | 8.25E-04 | 7.69E-04 | 3.52E-04 | 1.80E-04 | 0.007807 | 3.64E-04 | 1.34E-04 | 0.006571 | 4.95E-04 | 7.10E-05 | 2.70E-05 |
| 0        | 0        | 0.014872 | 0        | 0        | 0        | 3.80E-05 | 0        | 0        | 0        | 0        | 0        |
| 0.005707 | 0        | 0        | 0        | 0        | 0        | 0        | 0        | 0        | 0        | 0        | 0        |
| 0        | 0        | 0        | 0        | 0        | 0        | 0        | 0        | 0        | 0        | 0        | 0        |
| 0        | 0        | 0        | 0        | 0        | 0        | 0        | 0        | 0        | 6.80E-05 | 0        | 0        |
| 1.65E-04 | 0        | 6.54E-04 | 0        | 2.88E-04 | 0        | 0        | 0        | 0        | 0        | 0        | 0        |
| 0        | 0        | 3.81E-04 | 0        | 0        | 0        | 1.15E-04 | 0        | 0        | 0        | 0        | 8.40E-05 |
| 0        | 1.12E-04 | 0        | 0        | 0        | 2.00E-05 | 0        | 5.40E-05 | 4.58E-04 | 0        | 0        | 0        |
| 0        | 0        | 2.00E-05 | 0        | 0        | 0        | 0        | 0        | 0        | 0        | 0        | 0        |
| 4.70E-05 | 1.51E-04 | 0.001349 | 0.001493 | 0.001203 | 4.66E-04 | 0.001396 | 0.001736 | 0        | 0        | 0        | 1.58E-04 |
| 0.001595 | 0        | 0        | 0        | 0        | 0        | 0        | 0        | 0        | 3.10E-05 | 3.20E-05 | 3.30E-05 |
| 6.67E-04 | 0        | 0        | 0        | 0        | 0        | 4.00E-05 | 0        | 0        | 2.10E-04 | 0        | 0        |
| 4.90E-05 | 4.00E-05 | 2.50E-05 | 0        | 1.15E-04 | 1.25E-04 | 2.14E-04 | 1.91E-04 | 0        | 0        | 0        | 3.70E-05 |
| 5.90E-05 | 4.83E-04 | 2.11E-04 | 1.72E-04 | 4.40E-04 | 2.08E-04 | 8.70E-05 | 1.54E-04 | 1.28E-04 | 0        | 0        | 1.30E-04 |
| 0        | 3.70E-05 | 0        | 0        | 0        | 0        | 1.68E-04 | 0        | 0        | 1.30E-04 | 0        | 0        |
| 0        | 0        | 0        | 0        | 0        | 3.00E-05 | 0        | 0        | 1.60E-05 | 0        | 0        | 0        |
| 0        | 3.90E-05 | 7.00E-05 | 0        | 1.64E-04 | 1.42E-04 | 1.74E-04 | 1.31E-04 | 0        | 3.20E-05 | 0        | 1.17E-04 |
| 0.004508 | 0        | 0        | 0        | 0        | 0        | 0        | 0        | 0        | 0        | 0        | 0        |
| 0        | 0        | 0.007409 | 0        | 0        | 0        | 0        | 0        | 0        | 0.00289  | 0        | 0        |
| 0        | 5.00E-05 | 0        | 0.001206 | 0        | 4.10E-05 | 0        | 0        | 1.19E-04 | 0        | 0        | 0        |
| 5.30E-05 | 0        | 0        | 0        | 0        | 0        | 0        | 0        | 0        | 0        | 0        | 0        |
| 0        | 0        | 0        | 0        | 0        | 0        | 0        | 0        | 0        | 0        | 0        | 0        |
| 0.01608  | 0.001307 | 0.013263 | 0.004997 | 0.004659 | 0.002308 | 0.012734 | 0.007277 | 0.001903 | 0.005857 | 0.013447 | 0.012782 |

Table S33. The detailed values of gut microbial diversity index and observed OTUs among CP (n=36), CPR (n=18), and HC (n=72) groups.

| sample | reads | label | ace  | chao       | shannon    | simpson  | coverage | observed_otus |     |
|--------|-------|-------|------|------------|------------|----------|----------|---------------|-----|
| CP01   | 31489 |       | 0.97 | 201.067692 | 213.235294 | 1.667416 | 0.456956 | 0.998698      | 165 |
| CP21   | 31654 |       | 0.97 | 50.166881  | 48.5       | 0.73286  | 0.633118 | 0.999747      | 45  |
| CP22   | 56644 |       | 0.97 | 361.487457 | 281        | 2.704022 | 0.118824 | 0.99887       | 197 |
| CP24   | 30330 |       | 0.97 | 75.209466  | 70         | 0.140884 | 0.962296 | 0.999472      | 40  |
| CP25   | 27621 |       | 0.97 | 197.070466 | 195.75     | 2.140191 | 0.34789  | 0.998733      | 166 |
| CP26   | 42209 |       | 0.97 | 334.330974 | 340.034483 | 3.482477 | 0.070752 | 0.99865       | 285 |
| CP27   | 49652 |       | 0.97 | 305.964285 | 320.956522 | 3.061361 | 0.100055 | 0.998872      | 254 |
| CP28   | 61416 |       | 0.97 | 187.714695 | 199        | 1.82492  | 0.238741 | 0.999398      | 162 |
| CP29   | 61483 |       | 0.97 | 193.431115 | 197.555556 | 2.181263 | 0.203754 | 0.999528      | 175 |
| CP30   | 42015 |       | 0.97 | 108.728746 | 104.4      | 1.558696 | 0.35855  | 0.999476      | 89  |
| CP31   | 33152 |       | 0.97 | 369.496133 | 145        | 0.090787 | 0.976345 | 0.998914      | 55  |
| CP32   | 39183 |       | 0.97 | 251.370945 | 207        | 2.919652 | 0.102262 | 0.999005      | 150 |
| CP33   | 20422 |       | 0.97 | 246.425096 | 240.16129  | 3.55354  | 0.051729 | 0.998041      | 215 |
| CP34   | 41577 |       | 0.97 | 251.177689 | 273.5      | 3.062047 | 0.092475 | 0.998966      | 209 |
| CP35   | 42439 |       | 0.97 | 392.425772 | 386.25     | 2.958414 | 0.133122 | 0.998209      | 315 |
| CP36   | 45876 |       | 0.97 | 311.394151 | 309.0625   | 3.603732 | 0.055046 | 0.998845      | 266 |
| CP20   | 42142 |       | 0.97 | 136.024625 | 143.333333 | 2.287458 | 0.179041 | 0.999407      | 110 |
| CP19   | 44382 |       | 0.97 | 136.666956 | 138.769231 | 1.491432 | 0.311645 | 0.999302      | 103 |
| CP23   | 45331 |       | 0.97 | 52.679179  | 46.142857  | 0.163161 | 0.950817 | 0.999713      | 35  |
| CPI7   | 42280 |       | 0.97 | 158.205636 | 176        | 0.570417 | 0.817909 | 0.99929       | 89  |
| CP02   | 31810 |       | 0.97 | 83.578685  | 80.6       | 1.265948 | 0.413904 | 0.999466      | 67  |
| CP03   | 27480 |       | 0.97 | 92.349466  | 98.5       | 0.76672  | 0.714889 | 0.999127      | 64  |
| CP04   | 57604 |       | 0.97 | 235.515699 | 202        | 1.099829 | 0.641076 | 0.999375      | 112 |
| CP05   | 40549 |       | 0.97 | 133.67223  | 135.461538 | 0.668026 | 0.784253 | 0.99926       | 102 |
| CP18   | 33324 |       | 0.97 | 130.035087 | 119.454545 | 1.349886 | 0.479352 | 0.99913       | 101 |
| CP07   | 51571 |       | 0.97 | 95.709904  | 89.230769  | 1.829343 | 0.298104 | 0.99969       | 80  |
| CP08   | 44235 |       | 0.97 | 237.318714 | 252.666667 | 2.615052 | 0.124706 | 0.998824      | 179 |
| CP09   | 36465 |       | 0.97 | 183.667091 | 180.368421 | 3.132988 | 0.072278 | 0.999205      | 159 |
| CP06   | 52111 |       | 0.97 | 157.104102 | 131.230769 | 1.241751 | 0.423125 | 0.999443      | 100 |
| CP11   | 31236 |       | 0.97 | 106.636878 | 101.5      | 0.634887 | 0.765471 | 0.999296      | 85  |
| CP12   | 33271 |       | 0.97 | 273.909026 | 207.47619  | 1.3312   | 0.51739  | 0.998587      | 156 |
| CP13   | 28076 |       | 0.97 | 149.90407  | 150.071429 | 1.9271   | 0.282673 | 0.999038      | 125 |
| CP14   | 43254 |       | 0.97 | 291.209212 | 298.041667 | 3.404199 | 0.062521 | 0.998913      | 253 |
| CP15   | 50283 |       | 0.97 | 82.353912  | 71         | 1.990948 | 0.252428 | 0.999741      | 58  |
| CP16   | 44329 |       | 0.97 | 188.44898  | 196.1875   | 1.428169 | 0.514273 | 0.99921       | 159 |
| CP10   | 35119 |       | 0.97 | 220.475    | 212.464286 | 2.859708 | 0.108386 | 0.998889      | 186 |
| CPR11  | 34277 |       | 0.97 | 104.389682 | 104.25     | 1.439682 | 0.473689 | 0.999358      | 85  |
| CPR18  | 34586 |       | 0.97 | 309.466088 | 269.565217 | 2.400912 | 0.218783 | 0.998236      | 190 |
| CPR17  | 29721 |       | 0.97 | 214.586651 | 209.136364 | 1.407689 | 0.591897 | 0.998587      | 170 |
| CPR16  | 31954 |       | 0.97 | 147.731133 | 141.647059 | 2.922503 | 0.079986 | 0.999218      | 124 |
| CPR15  | 27165 |       | 0.97 | 145.346177 | 165.25     | 2.470028 | 0.144436 | 0.998969      | 118 |
| CPR14  | 32302 |       | 0.97 | 311.018426 | 268        | 2.627461 | 0.14656  | 0.998204      | 181 |
| CPR13  | 22278 |       | 0.97 | 242.781601 | 252.05     | 3.332232 | 0.085987 | 0.998115      | 209 |
| CPR12  | 34357 |       | 0.97 | 211.190222 | 188.055556 | 2.297652 | 0.222994 | 0.998981      | 155 |
| CPR10  | 35251 |       | 0.97 | 235.672543 | 228.037037 | 3.153578 | 0.098856 | 0.998922      | 202 |
| CPR09  | 21557 |       | 0.97 | 303.245511 | 312.517241 | 3.128267 | 0.123695 | 0.997031      | 243 |
| CPR08  | 43962 |       | 0.97 | 178.596103 | 175.368421 | 1.894241 | 0.406949 | 0.99934       | 154 |
| CPR07  | 42324 |       | 0.97 | 99.68072   | 96         | 1.523905 | 0.299663 | 0.999527      | 77  |
| CPR06  | 46627 |       | 0.97 | 173.98631  | 159.44     | 2.053676 | 0.267305 | 0.999271      | 137 |
| CPR05  | 59740 |       | 0.97 | 316.257194 | 321.37037  | 3.240932 | 0.090394 | 0.999012      | 258 |
| CPR04  | 40943 |       | 0.97 | 372.128221 | 368.085714 | 3.271125 | 0.079787 | 0.998339      | 303 |
| CPR03  | 23093 |       | 0.97 | 125.052197 | 120.769231 | 2.216735 | 0.224906 | 0.999047      | 103 |
| CPR02  | 41440 |       | 0.97 | 212.394748 | 204.12     | 2.259768 | 0.17212  | 0.998962      | 168 |
| CPR01  | 31603 |       | 0.97 | 147.16883  | 149        | 2.894898 | 0.112956 | 0.999336      | 128 |
| HC51   | 19480 |       | 0.97 | 431.23625  | 448.885714 | 2.876104 | 0.204435 | 0.995175      | 324 |
| HC50   | 11470 |       | 0.97 | 688.576422 | 641.507353 | 4.538892 | 0.031614 | 0.987969      | 572 |
| HC49   | 34415 |       | 0.97 | 458.843742 | 443.323077 | 3.649536 | 0.063967 | 0.997908      | 404 |
| HC48   | 38077 |       | 0.97 | 224.490854 | 219.75     | 2.70663  | 0.108204 | 0.998897      | 189 |
| HC47   | 27320 |       | 0.97 | 494.229207 | 483.52459  | 4.225479 | 0.03128  | 0.996889      | 425 |
| HC46   | 48581 |       | 0.97 | 360.293984 | 370.103448 | 3.225528 | 0.097792 | 0.998744      | 307 |
| HC45   | 21690 |       | 0.97 | 306.321009 | 301.676471 | 2.960702 | 0.12616  | 0.997464      | 258 |
| HC41   | 30428 |       | 0.97 | 527.636661 | 524.196078 | 3.709752 | 0.071073 | 0.996484      | 413 |

|      |       |      |            |            |          |          |          |     |
|------|-------|------|------------|------------|----------|----------|----------|-----|
| HC43 | 25280 | 0.97 | 465.380701 | 446.5      | 3.442358 | 0.107172 | 0.996638 | 387 |
| HC42 | 28633 | 0.97 | 255.614978 | 254.666667 | 1.892381 | 0.286558 | 0.997765 | 180 |
| HC52 | 58951 | 0.97 | 502.221417 | 496.75     | 3.517711 | 0.081796 | 0.998507 | 417 |
| HC40 | 8033  | 0.97 | 324.560805 | 306.488372 | 2.5033   | 0.194746 | 0.990041 | 233 |
| HC39 | 35664 | 0.97 | 489.069672 | 465.2      | 3.788586 | 0.060656 | 0.997729 | 422 |
| HC38 | 30889 | 0.97 | 539.096702 | 526.28125  | 3.131462 | 0.143928 | 0.996504 | 436 |
| HC44 | 32157 | 0.97 | 392.155974 | 384.065217 | 3.190705 | 0.136566 | 0.997916 | 336 |
| HC53 | 44194 | 0.97 | 530.844433 | 514.166667 | 3.413747 | 0.108859 | 0.997715 | 430 |
| HC57 | 27335 | 0.97 | 247.555504 | 239.037037 | 2.805246 | 0.135315 | 0.998281 | 199 |
| HC55 | 39344 | 0.97 | 316.951839 | 350.315789 | 3.193653 | 0.102837 | 0.99845  | 254 |
| HC70 | 26236 | 0.97 | 253.711772 | 252.285714 | 3.187389 | 0.081865 | 0.99817  | 212 |
| HC69 | 31277 | 0.97 | 568.900106 | 555.238095 | 3.898989 | 0.04539  | 0.996355 | 453 |
| HC68 | 26650 | 0.97 | 463.509257 | 466.326087 | 3.420466 | 0.09472  | 0.996323 | 363 |
| HC67 | 16960 | 0.97 | 465.98105  | 456.245283 | 3.486675 | 0.094505 | 0.994399 | 372 |
| HC66 | 27806 | 0.97 | 430.541901 | 407.684211 | 4.024016 | 0.040734 | 0.997303 | 359 |
| HC65 | 30941 | 0.97 | 461.819347 | 455.456522 | 3.821259 | 0.053192 | 0.997221 | 376 |
| HC64 | 20375 | 0.97 | 417.67523  | 448.666667 | 3.524135 | 0.074812 | 0.995632 | 330 |
| HC63 | 33145 | 0.97 | 323.225233 | 321.529412 | 3.383005 | 0.081377 | 0.998401 | 281 |
| HC62 | 28400 | 0.97 | 715.825163 | 668.714286 | 4.59394  | 0.021266 | 0.995458 | 595 |
| HC61 | 32275 | 0.97 | 571.320748 | 554.243243 | 3.917529 | 0.05288  | 0.996871 | 486 |
| HC60 | 27690 | 0.97 | 568.028435 | 559.175439 | 4.236414 | 0.033864 | 0.996027 | 454 |
| HC59 | 23282 | 0.97 | 443.003304 | 452        | 3.213697 | 0.168716 | 0.996134 | 363 |
| HC58 | 20528 | 0.97 | 588.686109 | 528.9      | 4.006054 | 0.042736 | 0.994641 | 409 |
| HC37 | 48295 | 0.97 | 400.421412 | 412.181818 | 3.624674 | 0.060344 | 0.998551 | 339 |
| HC56 | 32701 | 0.97 | 473.857231 | 456.766667 | 3.882773 | 0.044683 | 0.997645 | 408 |
| HC54 | 38305 | 0.97 | 592.884815 | 594.28125  | 3.921788 | 0.049251 | 0.997181 | 504 |
| HC36 | 29266 | 0.97 | 423.306157 | 413.22     | 4.06162  | 0.034299 | 0.997711 | 369 |
| HC09 | 21164 | 0.97 | 414.955238 | 418.216216 | 3.504463 | 0.102895 | 0.996031 | 324 |
| HC34 | 31257 | 0.97 | 286.025961 | 288.214286 | 3.041132 | 0.130429 | 0.998304 | 239 |
| HC14 | 46259 | 0.97 | 258.954262 | 250.935484 | 2.371419 | 0.19132  | 0.999027 | 219 |
| HC13 | 22885 | 0.97 | 511.349824 | 552.081081 | 3.86715  | 0.052113 | 0.995237 | 393 |
| HC12 | 20852 | 0.97 | 476.278233 | 486.634146 | 3.131816 | 0.198998 | 0.995108 | 361 |
| HC11 | 30464 | 0.97 | 377.51361  | 383.27027  | 2.952224 | 0.163657 | 0.997702 | 318 |
| HC10 | 43118 | 0.97 | 114.224904 | 124.666667 | 2.121554 | 0.220771 | 0.999606 | 102 |
| HC71 | 22490 | 0.97 | 500.511174 | 484.942857 | 4.081269 | 0.041248 | 0.996043 | 429 |
| HC15 | 28032 | 0.97 | 380.151853 | 396.551724 | 3.453789 | 0.086096 | 0.997217 | 293 |
| HC08 | 19588 | 0.97 | 550.044933 | 565.5      | 4.36068  | 0.024168 | 0.994027 | 435 |
| HC06 | 56364 | 0.97 | 607.884619 | 623.375    | 3.185692 | 0.148643 | 0.997924 | 482 |
| HC05 | 18887 | 0.97 | 249.417898 | 200.4      | 1.979459 | 0.237026 | 0.997406 | 122 |
| HC04 | 53199 | 0.97 | 203.325936 | 198.75     | 2.465395 | 0.154366 | 0.999342 | 169 |
| HC03 | 17808 | 0.97 | 344.701175 | 354.833333 | 3.543382 | 0.068325 | 0.996013 | 272 |
| HC02 | 33528 | 0.97 | 460.774937 | 489.4      | 2.919019 | 0.136878 | 0.997107 | 373 |
| HC01 | 28843 | 0.97 | 314.942093 | 304.775    | 2.982648 | 0.158327 | 0.998128 | 269 |
| HC07 | 22630 | 0.97 | 338.079617 | 324.634146 | 3.281583 | 0.091675 | 0.997304 | 280 |
| HC16 | 22164 | 0.97 | 440.473132 | 446.512195 | 3.844077 | 0.049455 | 0.995984 | 351 |
| HC17 | 40105 | 0.97 | 460.418069 | 456.625    | 3.885085 | 0.043591 | 0.997905 | 384 |
| HC18 | 22605 | 0.97 | 308.712455 | 315.777778 | 3.577977 | 0.053086 | 0.997301 | 248 |
| HC33 | 48259 | 0.97 | 159.468421 | 158        | 2.677283 | 0.121754 | 0.999399 | 129 |
| HC32 | 21079 | 0.97 | 410.122654 | 365.121212 | 1.920792 | 0.431204 | 0.996062 | 262 |
| HC31 | 18518 | 0.97 | 383.893634 | 388.777778 | 3.827242 | 0.04248  | 0.99568  | 301 |
| HC30 | 37395 | 0.97 | 494.397652 | 489.818182 | 3.731413 | 0.059769 | 0.997593 | 417 |
| HC29 | 28440 | 0.97 | 309.487959 | 331.391304 | 3.306892 | 0.081901 | 0.997996 | 262 |
| HC28 | 28427 | 0.97 | 387.369516 | 393.171429 | 3.360667 | 0.120247 | 0.997643 | 330 |
| HC27 | 53068 | 0.97 | 733.933116 | 700        | 4.319796 | 0.03624  | 0.997739 | 630 |
| HC26 | 27004 | 0.97 | 217.385056 | 217.666667 | 2.194253 | 0.188759 | 0.998445 | 122 |
| HC25 | 16491 | 0.97 | 415.285613 | 392.631579 | 3.024273 | 0.203937 | 0.994724 | 327 |
| HC24 | 19812 | 0.97 | 548.178043 | 545.775862 | 4.247217 | 0.037325 | 0.994599 | 448 |
| HC23 | 24902 | 0.97 | 512.889789 | 504.75     | 3.264869 | 0.150824 | 0.995743 | 412 |
| HC22 | 26985 | 0.97 | 309.814028 | 296.486486 | 2.959706 | 0.134562 | 0.997628 | 242 |
| HC21 | 23180 | 0.97 | 433.42823  | 432.456522 | 3.162363 | 0.182562 | 0.99629  | 353 |
| HC20 | 17879 | 0.97 | 374.788295 | 382.428571 | 3.732578 | 0.058471 | 0.995749 | 301 |
| HC19 | 17721 | 0.97 | 624.322064 | 580.8      | 3.68779  | 0.081814 | 0.992833 | 403 |
| HC35 | 19209 | 0.97 | 491.046754 | 456.940299 | 3.688085 | 0.063384 | 0.994586 | 377 |
| HC72 | 52976 | 0.97 | 545.729772 | 536.666667 | 4.388923 | 0.025482 | 0.99849  | 484 |

| Table S34. The abundance and composition at the genus level of each sample among CP (n=36), CPR (n=18), and HC (n=72) groups. |          |          |          |          |          |          |          |          |          |          |          |
|-------------------------------------------------------------------------------------------------------------------------------|----------|----------|----------|----------|----------|----------|----------|----------|----------|----------|----------|
| ID                                                                                                                            | CP25     | CP26     | CP32     | CP36     | CP34     | CP20     | CP33     | CP10     | CP07     | CP18     | CP27     |
| Bacteroides                                                                                                                   | 0.723215 | 0.675336 | 0.5718   | 0.504231 | 0.438893 | 0.322012 | 0.278372 | 0.247034 | 0.18228  | 0.127271 | 0.0979   |
| Faecalibacterium                                                                                                              | 0.007573 | 0.028523 | 5.00E-05 | 0.006981 | 0        | 0.340668 | 0        | 0.136444 | 0        | 0        | 0.233153 |
| Subdoligranulum                                                                                                               | 0.049507 | 0.072544 | 7.20E-05 | 0.029256 | 2.00E-05 | 6.02E-04 | 0.07897  | 0.001168 | 0        | 0.75057  | 0.115172 |
| Lachnospiraceae_incertae_sedis                                                                                                | 0.020203 | 0.040174 | 0.029211 | 0.097051 | 0.242225 | 0.176061 | 0.160445 | 0.150114 | 2.30E-05 | 2.09E-04 | 0.246649 |
| Escherichia-Shigella                                                                                                          | 0.005271 | 3.03E-04 | 4.00E-05 | 0.043374 | 0.064604 | 0.035629 | 0.045804 | 0.246077 | 0.513772 | 0.005694 | 6.50E-05 |
| Prevotella                                                                                                                    | 0.06441  | 0        | 0        | 2.60E-05 | 0.036476 | 0        | 3.80E-05 | 0.001657 | 0        | 0.001213 | 0.032049 |
| Blautia                                                                                                                       | 0.003013 | 0.020987 | 0.075459 | 0.042651 | 0.036549 | 0.004777 | 0.012784 | 0.007811 | 0.169598 | 5.90E-05 | 0.017046 |
| Akkermansia                                                                                                                   | 0        | 8.00E-05 | 0        | 0        | 0        | 0        | 0.030877 | 0        | 3.90E-05 | 2.80E-05 | 0.013109 |
| Ruminococcaceae_uncultured                                                                                                    | 0.001436 | 0.018735 | 6.69E-04 | 0.009356 | 1.04E-04 | 0.002799 | 0.028697 | 3.58E-04 | 7.59E-04 | 2.22E-04 | 0.00543  |
| Megamonas                                                                                                                     | 0.021969 | 0.00844  | 0        | 0        | 0        | 0        | 0.002734 | 2.42E-04 | 0        | 0        | 1.50E-05 |
| Pseudobutyrvibrio                                                                                                             | 0        | 0.052329 | 2.30E-05 | 0.026756 | 0        | 2.40E-05 | 5.02E-04 | 3.10E-05 | 0        | 0        | 0.045922 |
| Streptococcus                                                                                                                 | 2.23E-04 | 2.10E-05 | 3.59E-04 | 0.005751 | 0.002059 | 2.71E-04 | 0.049904 | 5.60E-05 | 1.62E-04 | 0.037366 | 1.70E-04 |
| Enterococcus                                                                                                                  | 0        | 0        | 0        | 0        | 0        | 0        | 0        | 0.003824 | 0        | 0        | 0        |
| Bifidobacterium                                                                                                               | 0.00142  | 0        | 0        | 0        | 2.30E-05 | 0        | 0        | 0.032838 | 0        | 0        | 3.60E-05 |
| Roseburia                                                                                                                     | 0.035986 | 0.015125 | 0.002482 | 0.042314 | 0        | 0        | 0.007726 | 0        | 0        | 0        | 0.001575 |
| Alistipes                                                                                                                     | 3.40E-05 | 0.003887 | 6.19E-04 | 0.004781 | 3.26E-04 | 0.008743 | 0.036546 | 0.003935 | 1.50E-05 | 1.78E-04 | 0.011905 |
| Lachnospiraceae_unclassified                                                                                                  | 2.46E-04 | 0.012705 | 0.004393 | 0.01103  | 0.007686 | 0.002037 | 0.00249  | 0.001076 | 4.80E-05 | 2.70E-05 | 0.007627 |
| Lachnospira                                                                                                                   | 0        | 0        | 0        | 1.19E-04 | 0        | 0        | 8.80E-05 | 0        | 0        | 1.52E-04 | 0        |
| Ruminococcaceae_unclassified                                                                                                  | 9.72E-04 | 0.003833 | 0        | 0.00122  | 3.72E-04 | 4.91E-04 | 0        | 0.073622 | 0        | 0        | 0.082521 |
| Phascolarctobacterium                                                                                                         | 0.010453 | 0.00199  | 0.003355 | 0.010815 | 0.011838 | 0        | 0.06149  | 5.91E-04 | 0.002891 | 0.002159 | 0.00488  |
| Anaerostipes                                                                                                                  | 2.80E-05 | 0.002491 | 0.00798  | 0.022353 | 5.66E-04 | 0        | 0        | 0        | 3.40E-05 | 2.50E-05 | 0.015535 |
| Lachnospiraceae_uncultured                                                                                                    | 0        | 0.004889 | 0.050165 | 0.020133 | 0.017715 | 0.004063 | 9.63E-04 | 0.006156 | 0        | 0        | 0.001901 |
| Parasutterella                                                                                                                | 0.005917 | 0        | 0.111454 | 0        | 0        | 0        | 9.90E-04 | 0.026959 | 0        | 0        | 0        |
| Clostridium_sensu_stricto_1                                                                                                   | 0        | 0        | 0        | 0        | 0        | 0        | 0        | 0        | 0        | 9.80E-05 | 7.90E-05 |
| Ruminococcus                                                                                                                  | 4.50E-04 | 0.007976 | 5.48E-04 | 0.026248 | 0        | 0        | 0        | 3.12E-04 | 0        | 0        | 0        |
| Peptostreptococcaceae_incertae_sedis                                                                                          | 0        | 5.50E-04 | 0        | 0        | 0.04185  | 1.70E-05 | 1.25E-04 | 0.003962 | 0.001688 | 0        | 1.55E-04 |
| Fusobacterium                                                                                                                 | 0.026589 | 0        | 0.059216 | 0        | 8.31E-04 | 6.90E-05 | 0.009975 | 0        | 0.003799 | 8.20E-05 | 1.90E-05 |
| Coprococcus                                                                                                                   | 0        | 0.001193 | 0.01783  | 0.003134 | 0.047243 | 0.003038 | 0        | 0.001906 | 0        | 0        | 5.24E-04 |
| Parabacteroides                                                                                                               | 0.005651 | 0        | 0.005082 | 0.004777 | 0.003819 | 0.018646 | 0.012309 | 0.007836 | 0        | 0.002299 | 9.38E-04 |
| Klebsiella                                                                                                                    | 0        | 0        | 0        | 0        | 0        | 3.90E-05 | 0        | 0        | 0        | 0        | 0        |
| Actinomyces                                                                                                                   | 8.00E-05 | 5.80E-05 | 8.00E-05 | 0        | 0.001517 | 0        | 1.66E-04 | 0        | 2.16E-04 | 1.03E-04 | 6.01E-04 |
| Erysipelotrichaceae_incertae_sedis                                                                                            | 3.89E-04 | 6.55E-04 | 0.012067 | 0.002995 | 0.004365 | 7.56E-04 | 4.80E-05 | 0.002694 | 5.90E-04 | 0.060204 | 0.005209 |
| Rothia                                                                                                                        | 7.00E-05 | 2.20E-05 | 2.30E-05 | 0.002074 | 1.53E-04 | 0        | 5.70E-05 | 0        | 2.40E-05 | 0.001873 | 4.20E-05 |
| Dialister                                                                                                                     | 0        | 0        | 0        | 0        | 0        | 0        | 7.12E-04 | 0.001928 | 0        | 0        | 9.70E-05 |
| Megasphaera                                                                                                                   | 0        | 0        | 0        | 0        | 0        | 0        | 0.001443 | 6.60E-05 | 0        | 0        | 0        |
| Ruminococcaceae_incertae_sedis                                                                                                | 6.76E-04 | 0.0121   | 0.016755 | 0.00456  | 0.018386 | 0.001991 | 0.001796 | 0.002995 | 0        | 1.70E-04 | 0.024267 |
| Dorea                                                                                                                         | 0.003803 | 0.002547 | 0.009408 | 0.006105 | 0.005735 | 0        | 0        | 1.41E-04 | 0        | 0.001118 | 0.003047 |
| Erysipelotrichaceae_uncultured                                                                                                | 0        | 4.00E-05 | 0        | 0.00345  | 0        | 1.26E-04 | 5.10E-05 | 0.00516  | 0        | 0        | 0        |
| Veillonella                                                                                                                   | 4.20E-05 | 8.20E-04 | 6.04E-04 | 0.003007 | 2.55E-04 | 7.30E-05 | 0.003483 | 5.46E-04 | 0.01536  | 2.30E-05 | 0.001799 |
| Bacteria_unclassified                                                                                                         | 0.003591 | 9.85E-04 | 6.78E-04 | 3.58E-04 | 9.80E-04 | 1.99E-04 | 7.46E-04 | 2.31E-04 | 1.40E-04 | 7.90E-05 | 5.88E-04 |
| Sutterella                                                                                                                    | 0        | 0        | 0        | 0        | 0        | 0.002262 | 0.003275 | 0        | 1.34E-04 | 0        | 0        |
| Christensenellaceae_uncultured                                                                                                | 0        | 0        | 0        | 2.00E-05 | 0        | 0        | 0        | 0        | 0        | 0        | 0        |
| Lactobacillus                                                                                                                 | 0        | 0        | 0        | 0.026665 | 0        | 0        | 0        | 0        | 0.100317 | 0.002933 | 0        |
| Halomonas                                                                                                                     | 6.80E-05 | 6.62E-04 | 0.004669 | 0.00372  | 7.50E-04 | 9.09E-04 | 2.55E-04 | 0.001086 | 0.002449 | 0.002822 | 0.007796 |
| Flavonifractor                                                                                                                | 0.002747 | 2.54E-04 | 0        | 0.001792 | 9.01E-04 | 0.036355 | 0.00363  | 0.010804 | 0        | 0        | 0        |
| Asteroleplasma                                                                                                                | 0        | 0        | 0        | 0        | 0        | 0        | 0        | 0        | 0        | 0        | 0        |
| Clostridiales_unclassified                                                                                                    | 4.40E-05 | 4.94E-04 | 0        | 2.89E-04 | 0.004209 | 8.80E-05 | 3.91E-04 | 8.50E-05 | 0        | 0        | 9.63E-04 |
| Anaerotruncus                                                                                                                 | 1.90E-04 | 0.001112 | 0        | 2.09E-04 | 6.58E-04 | 8.59E-04 | 0.013114 | 1.57E-04 | 0        | 0        | 0.001264 |
| Barnesiella                                                                                                                   | 0        | 0        | 0        | 0        | 0        | 0        | 0        | 3.77E-04 | 0        | 0        | 0        |
| Paraprevotella                                                                                                                | 0        | 0        | 0        | 0.025159 | 0.004736 | 0        | 0        | 3.20E-05 | 0        | 7.20E-05 | 0.005675 |
| Defluviitaleaceae_incertae_sedis                                                                                              | 0        | 0        | 0        | 0        | 7.10E-05 | 0.020571 | 3.14E-04 | 0        | 0        | 0        | 0        |
| S24-7_norank                                                                                                                  | 0        | 0        | 0        | 0        | 0        | 0        | 0.04054  | 0        | 0        | 6.20E-05 | 0        |
| Raoultella                                                                                                                    | 0        | 0        | 0        | 0        | 0        | 0        | 4.40E-05 | 0.002638 | 3.00E-05 | 0        | 0        |
| Bacteroidales_unclassified                                                                                                    | 3.31E-04 | 2.50E-05 | 3.50E-05 | 1.80E-05 | 0.002111 | 4.00E-05 | 0.001373 | 3.10E-05 | 0        | 0        | 2.80E-05 |
| Acidaminococcus                                                                                                               | 0        | 0        | 0        | 0        | 2.90E-05 | 0        | 0.081088 | 0        | 0        | 0        | 0        |
| Desulfovibrio                                                                                                                 | 0        | 0        | 0        | 0        | 0        | 0        | 0.009316 | 8.80E-05 | 0        | 0        | 0        |

|                                 |          |          |          |          |          |          |          |          |          |          |          |
|---------------------------------|----------|----------|----------|----------|----------|----------|----------|----------|----------|----------|----------|
| Peptostreptococcus              | 0        | 0        | 0        | 0        | 0        | 0        | 0        | 0        | 0        | 9.10E-05 | 2.10E-05 |
| Prevotellaceae_uncultured       | 0        | 0        | 0        | 0        | 0        | 0        | 0        | 0        | 0        | 5.24E-04 | 0        |
| Alloprevotella                  | 0.001893 | 0        | 0        | 0        | 0        | 0        | 0        | 0        | 0        | 0        | 0        |
| Butyrivibrio                    | 0        | 0.002884 | 0        | 0        | 3.10E-05 | 0.003554 | 2.87E-04 | 7.84E-04 | 0        | 0        | 0.001167 |
| Defluviitaleaceae_uncultured    | 4.24E-04 | 7.10E-04 | 0        | 8.27E-04 | 2.59E-04 | 0        | 0        | 0        | 0        | 0        | 2.28E-04 |
| Butyrivibrio                    | 0        | 0        | 0        | 0        | 0        | 0        | 0        | 0        | 0        | 0        | 2.10E-05 |
| Haemophilus                     | 0        | 2.52E-04 | 0.002555 | 4.70E-05 | 0        | 0        | 7.96E-04 | 0        | 0        | 6.30E-05 | 0.002605 |
| Odoribacter                     | 0        | 8.52E-04 | 0        | 0        | 2.00E-05 | 0        | 0        | 0        | 0        | 0        | 9.80E-05 |
| Intestinimonas                  | 0        | 4.07E-04 | 0        | 1.80E-04 | 0        | 0.001236 | 2.25E-04 | 6.80E-05 | 0        | 0        | 2.86E-04 |
| Gastranaerophilales_norank      | 0        | 0        | 0        | 0        | 0        | 0        | 0        | 0        | 0        | 0        | 0        |
| Atopobium                       | 0        | 0        | 5.00E-05 | 0        | 5.20E-05 | 0        | 1.50E-04 | 0        | 0        | 6.00E-05 | 6.20E-05 |
| Citrobacter                     | 0        | 0        | 0        | 0        | 0        | 0        | 1.36E-04 | 0        | 0        | 0        | 0        |
| RC9_gut_group                   | 0        | 0        | 0        | 0        | 0        | 0        | 0        | 0        | 0        | 0        | 0        |
| Mitsuokella                     | 0        | 0        | 0        | 0        | 0        | 0        | 0        | 0        | 0        | 0        | 0        |
| Porphyromonas                   | 0        | 0        | 0        | 0        | 0        | 0.001224 | 0        | 0        | 1.80E-05 | 0        | 4.00E-05 |
| Enterobacteriaceae_unclassified | 3.90E-05 | 0        | 0        | 0        | 0        | 0        | 0        | 0.002093 | 2.63E-04 | 0        | 0        |
| Granulicatella                  | 0        | 0        | 4.20E-05 | 1.43E-04 | 2.40E-05 | 2.00E-05 | 1.60E-04 | 0        | 1.05E-04 | 2.90E-05 | 0        |
| Coprobacter                     | 0        | 0        | 0        | 0        | 0        | 0        | 0.003327 | 0        | 0        | 0        | 0.002532 |
| Pelagibacterium                 | 0        | 4.80E-05 | 6.74E-04 | 4.11E-04 | 4.70E-05 | 2.10E-05 | 0        | 1.30E-04 | 2.19E-04 | 3.41E-04 | 9.55E-04 |
| Candidate_division_TM7_norank   | 2.70E-05 | 9.80E-05 | 0        | 2.75E-04 | 9.20E-05 | 7.30E-05 | 4.64E-04 | 0        | 3.42E-04 | 0        | 0.002779 |
| Solobacterium                   | 0        | 7.40E-05 | 4.70E-05 | 0        | 2.30E-05 | 0        | 4.40E-05 | 0        | 1.13E-04 | 3.20E-05 | 1.95E-04 |
| Eubacterium                     | 0        | 0        | 0        | 0        | 0        | 0        | 1.08E-04 | 0        | 0        | 0        | 0        |
| Anaerofilum                     | 0        | 0        | 0        | 0        | 0        | 0        | 0        | 0.011856 | 0        | 0        | 1.66E-04 |
| Anaeroplasm                     | 0        | 0        | 0        | 0        | 0        | 0        | 0        | 0        | 0        | 0        | 0        |
| Others                          | 0.00102  | 0.00279  | 0.011506 | 0.005339 | 0.001397 | 0.009657 | 0.010632 | 0.002001 | 0.004572 | 0.001749 | 0.003094 |

| CP14     | CP22     | CP12     | CP16     | CP13     | CP19     | CP01     | CP09     | CP35     | CP29     | CP04     | CP28     | CP05     | CP30     | CP21     |
|----------|----------|----------|----------|----------|----------|----------|----------|----------|----------|----------|----------|----------|----------|----------|
| 0.089153 | 0.073991 | 0.071768 | 0.052478 | 0.025854 | 0.01871  | 0.018594 | 0.016724 | 0.01599  | 0.011917 | 0.01054  | 0.006326 | 0.004666 | 0.003566 | 0.003127 |
| 7.40E-05 | 0.197479 | 0        | 3.06E-04 | 0        | 1.92E-04 | 0.033667 | 4.90E-05 | 0.028481 | 7.46E-04 | 7.80E-05 | 4.09E-04 | 0.02605  | 0        | 0        |
| 0.173749 | 0.192964 | 0.724186 | 6.30E-05 | 0.455911 | 0.256103 | 0.051749 | 0.162753 | 0.328878 | 0.002133 | 0.864536 | 0.001092 | 0.910001 | 3.49E-04 | 0        |
| 0.102802 | 0.007873 | 0.017491 | 0.010055 | 0.056271 | 0.008311 | 0.011914 | 0.029645 | 0.033961 | 0.003178 | 0.014479 | 8.37E-04 | 0.030018 | 1.77E-04 | 0.001097 |
| 0        | 1.99E-04 | 0.002029 | 0.087671 | 0.298976 | 0.445284 | 0.005206 | 0.001092 | 0.00462  | 0.001055 | 1.10E-05 | 6.84E-04 | 2.50E-05 | 1.18E-04 | 0.774821 |
| 0        | 0.344315 | 2.87E-04 | 0.001022 | 0        | 0        | 0        | 0        | 0.01713  | 5.53E-04 | 0        | 0.001174 | 0        | 8.10E-04 | 0        |
| 0.06639  | 0.013404 | 7.50E-04 | 0.049028 | 0.053037 | 0.004436 | 0.009518 | 0.332291 | 0.053412 | 0.00198  | 0.039029 | 3.28E-04 | 0.00142  | 2.50E-05 | 7.00E-05 |
| 2.15E-04 | 0        | 0.00151  | 0.709057 | 6.70E-05 | 0.23081  | 0.673565 | 3.20E-05 | 4.30E-05 | 9.00E-05 | 0.011336 | 2.40E-04 | 0        | 8.90E-05 | 0        |
| 0.010727 | 0.002173 | 0.003197 | 0.02075  | 0.056967 | 0.002418 | 0.003521 | 0.03264  | 0.014352 | 5.53E-04 | 3.25E-04 | 2.08E-04 | 0.001032 | 2.70E-05 | 1.00E-04 |
| 2.30E-05 | 0.077966 | 3.65E-04 | 0        | 0        | 0        | 0        | 4.85E-04 | 0.030143 | 3.50E-05 | 0        | 3.08E-04 | 4.60E-05 | 3.63E-04 | 2.90E-05 |
| 0.105953 | 0.006675 | 5.70E-05 | 0.019074 | 0        | 2.00E-05 | 2.60E-05 | 0.016773 | 0.03806  | 4.64E-04 | 1.70E-05 | 1.77E-04 | 9.95E-04 | 0        | 0        |
| 0.01615  | 1.03E-04 | 0.001806 | 0.002874 | 4.31E-04 | 0.001615 | 1.66E-04 | 0.001198 | 0.003005 | 0.357979 | 0.002508 | 0.474502 | 1.51E-04 | 0.630366 | 5.33E-04 |
| 0        | 1.90E-05 | 0.002752 | 0        | 0        | 0        | 0.003032 | 0        | 0        | 1.24E-04 | 0.017012 | 1.14E-04 | 0.005991 | 0        | 4.12E-04 |
| 0.013999 | 0        | 5.80E-05 | 1.80E-05 | 5.63E-04 | 6.10E-04 | 0.052184 | 0.023522 | 0        | 1.29E-04 | 1.60E-05 | 1.70E-04 | 0        | 4.80E-05 | 0        |
| 0.037571 | 1.45E-04 | 2.09E-04 | 0.007318 | 0        | 0        | 3.40E-05 | 0.055761 | 0.004774 | 8.13E-04 | 0        | 4.30E-04 | 0.001014 | 2.46E-04 | 0        |
| 5.49E-04 | 0        | 0.002359 | 0.002195 | 0.005098 | 7.10E-05 | 0.001527 | 8.50E-05 | 0.001211 | 3.98E-04 | 5.90E-05 | 2.02E-04 | 4.30E-05 | 0        | 0        |
| 0.016377 | 9.91E-04 | 1.62E-04 | 4.06E-04 | 0.001036 | 0        | 6.99E-04 | 0.003395 | 0.014651 | 2.75E-04 | 1.75E-04 | 1.50E-04 | 0.001468 | 0        | 0        |
| 0.006624 | 0        | 1.40E-05 | 4.60E-05 | 0        | 0        | 0        | 0        | 0.036194 | 0        | 0        | 0        | 0        | 0        | 0        |
| 7.72E-04 | 0.045382 | 0        | 2.12E-04 | 6.95E-04 | 9.90E-05 | 0.00713  | 1.10E-04 | 0.008535 | 6.50E-05 | 0        | 9.90E-05 | 0.006658 | 2.00E-05 | 0        |
| 3.98E-04 | 1.50E-05 | 0.001948 | 4.90E-05 | 2.15E-04 | 0        | 8.37E-04 | 0        | 2.20E-05 | 4.90E-04 | 7.00E-05 | 1.16E-04 | 0        | 3.90E-04 | 7.48E-04 |
| 0.187197 | 3.60E-05 | 6.80E-05 | 0.001436 | 3.20E-05 | 0        | 7.45E-04 | 0.004967 | 0.001023 | 4.57E-04 | 3.30E-05 | 6.60E-05 | 5.60E-05 | 0        | 0        |
| 0.009833 | 0.001081 | 1.48E-04 | 2.02E-04 | 7.10E-05 | 0        | 2.40E-04 | 8.35E-04 | 0.007575 | 1.54E-04 | 0.001759 | 1.26E-04 | 4.13E-04 | 0        | 0        |
| 0        | 0        | 3.70E-05 | 8.68E-04 | 7.23E-04 | 4.60E-05 | 1.34E-04 | 0        | 9.11E-04 | 3.00E-05 | 0        | 3.30E-05 | 4.40E-05 | 2.50E-05 | 0        |
| 2.30E-05 | 0        | 0        | 0        | 0        | 0        | 0        | 0        | 0.002059 | 0        | 2.00E-05 | 4.72E-04 | 0        | 2.57E-04 | 0        |
| 0        | 1.80E-05 | 5.90E-05 | 0        | 0.012286 | 0.001336 | 4.30E-05 | 0        | 0        | 3.79E-04 | 0        | 8.60E-05 | 2.30E-05 | 0        | 0        |
| 0.002645 | 0.005545 | 0        | 0        | 0.001947 | 0        | 3.39E-04 | 0.003237 | 0.284332 | 1.38E-04 | 0        | 6.40E-05 | 0        | 4.60E-05 | 0        |
| 9.91E-04 | 6.97E-04 | 7.51E-04 | 0        | 0        | 6.70E-05 | 0        | 0        | 2.20E-05 | 1.94E-04 | 1.20E-05 | 1.85E-04 | 0        | 3.07E-04 | 0        |
| 0.013171 | 3.20E-05 | 3.43E-04 | 0.001051 | 0.005609 | 0        | 1.77E-04 | 0.02798  | 0.001988 | 2.25E-04 | 0        | 8.30E-05 | 5.75E-04 | 0        | 0        |
| 0.001184 | 0.003368 | 0.001009 | 0.001631 | 4.57E-04 | 7.10E-05 | 7.16E-04 | 2.60E-05 | 7.81E-04 | 2.01E-04 | 2.56E-04 | 8.40E-05 | 7.20E-05 | 6.80E-05 | 0        |
| 0        | 0        | 0        | 0        | 4.78E-04 | 0        | 0        | 0        | 5.10E-05 | 0        | 0        | 0        | 0        | 0        | 0.184056 |
| 3.68E-04 | 0        | 0.001378 | 6.08E-04 | 0        | 2.70E-04 | 0        | 3.56E-04 | 2.49E-04 | 0.101024 | 0.003965 | 0.291646 | 5.06E-04 | 0.168581 | 0.002362 |
| 0.029308 | 9.65E-04 | 0.144319 | 0.014924 | 0.004442 | 0.012989 | 0.001971 | 0.011369 | 0.00115  | 1.09E-04 | 0.00481  | 5.80E-05 | 9.46E-04 | 0        | 0.010155 |
| 7.09E-04 | 2.60E-05 | 3.60E-05 | 7.40E-04 | 1.76E-04 | 8.95E-04 | 3.30E-05 | 6.63E-04 | 0        | 0.346052 | 5.46E-04 | 0.036969 | 4.60E-05 | 0.107765 | 2.24E-04 |
| 8.30E-05 | 1.70E-05 | 3.50E-05 | 3.74E-04 | 0        | 2.50E-05 | 7.00E-05 | 1.66E-04 | 0.002086 | 1.20E-05 | 0        | 0        | 0        | 4.80E-05 | 0        |
| 0        | 0        | 1.87E-04 | 2.20E-05 | 0        | 0        | 0        | 0        | 0        | 2.26E-04 | 0        | 1.33E-04 | 2.50E-05 | 0.001732 | 0        |
| 0.072083 | 9.30E-05 | 0.005785 | 0.001448 | 9.11E-04 | 2.84E-04 | 0.003699 | 0.006479 | 0.004628 | 1.47E-04 | 9.10E-05 | 1.51E-04 | 0.001794 | 0        | 0        |
| 0.013597 | 7.50E-05 | 0        | 9.09E-04 | 9.00E-05 | 0        | 9.00E-05 | 0.066405 | 0.020746 | 1.62E-04 | 1.75E-04 | 9.60E-05 | 0.003521 | 0        | 0        |
| 0        | 0        | 4.44E-04 | 0        | 0        | 1.15E-04 | 0        | 0.136575 | 0.007889 | 3.50E-05 | 0.002667 | 0        | 0        | 0        | 0        |
| 0.001971 | 4.58E-04 | 1.58E-04 | 2.10E-05 | 0        | 1.42E-04 | 0.032395 | 1.37E-04 | 5.40E-05 | 0.022174 | 6.20E-05 | 0.008818 | 0        | 0.002366 | 4.54E-04 |
| 7.18E-04 | 2.34E-04 | 0.001071 | 0.001006 | 7.60E-05 | 0        | 3.00E-05 | 4.70E-05 | 4.80E-05 | 0        | 4.24E-04 | 0        | 2.80E-05 | 1.39E-04 | 0        |
| 3.30E-05 | 8.88E-04 | 8.20E-05 | 0        | 0        | 0        | 0        | 0        | 0        | 1.40E-05 | 0        | 0        | 0        | 0        | 0        |
| 0        | 0        | 0        | 0        | 0        | 0        | 0.003004 | 0        | 0.003167 | 0        | 0        | 0        | 0        | 0        | 0        |
| 0        | 3.40E-05 | 6.40E-05 | 0.001471 | 0        | 0        | 0        | 2.80E-05 | 2.50E-05 | 0.007927 | 0        | 1.29E-04 | 0        | 7.20E-05 | 0        |
| 3.97E-04 | 0.005945 | 0.004937 | 4.81E-04 | 0.001124 | 0.001954 | 2.14E-04 | 0.009757 | 0.001745 | 0.005929 | 0.006584 | 0.138137 | 5.37E-04 | 0.009568 | 0.002019 |
| 0.011082 | 6.31E-04 | 2.45E-04 | 0        | 0.003558 | 0        | 0.001327 | 9.60E-05 | 8.40E-05 | 4.70E-05 | 0        | 1.40E-05 | 0        | 0        | 0        |
| 0        | 0        | 0        | 0        | 0        | 0        | 0        | 0        | 0        | 0        | 0        | 0        | 0        | 0        | 0        |
| 0.002143 | 3.77E-04 | 1.62E-04 | 0        | 4.00E-04 | 4.10E-05 | 2.64E-04 | 0.003161 | 0.006488 | 0        | 0.001638 | 0        | 9.50E-05 | 0        | 0        |
| 0.001924 | 1.56E-04 | 5.16E-04 | 0.00124  | 2.48E-04 | 3.30E-05 | 9.60E-05 | 8.30E-05 | 0.010557 | 6.90E-05 | 0        | 0        | 6.20E-05 | 0        | 0        |
| 0        | 0        | 0        | 0        | 0.004431 | 0        | 0.002439 | 0        | 0        | 0        | 0        | 0        | 0        | 0        | 0        |
| 0        | 0.011308 | 0        | 0        | 0        | 0        | 0        | 7.10E-05 | 3.94E-04 | 2.32E-04 | 0        | 8.10E-05 | 0        | 0        | 0        |
| 0        | 0        | 2.80E-05 | 0        | 0        | 0        | 5.80E-05 | 0.028261 | 0        | 0        | 2.20E-05 | 0        | 0        | 0        | 0        |
| 0        | 0        | 0.001893 | 0        | 0        | 0        | 0        | 0        | 0        | 1.79E-04 | 0        | 1.80E-05 | 0        | 0        | 0        |
| 0        | 0        | 0        | 0        | 3.30E-05 | 4.10E-05 | 4.10E-05 | 0        | 0        | 0        | 2.30E-05 | 5.90E-05 | 0        | 0        | 0.016563 |
| 0        | 4.10E-05 | 5.60E-05 | 0        | 3.10E-05 | 0        | 0        | 0        | 0        | 0        | 0        | 0        | 0        | 0        | 0        |
| 0        | 0        | 0.002302 | 0        | 0        | 0        | 0        | 0        | 0        | 2.22E-04 | 0        | 6.90E-05 | 0        | 0        | 0        |
| 0        | 8.74E-04 | 4.55E-04 | 0        | 0        | 2.60E-05 | 0        | 0        | 1.57E-04 | 6.60E-05 | 0        | 0        | 0        | 0        | 0        |

|          |          |          |          |          |          |          |          |          |          |          |          |          |          |          |
|----------|----------|----------|----------|----------|----------|----------|----------|----------|----------|----------|----------|----------|----------|----------|
| 3.40E-04 | 1.70E-05 | 0        | 3.56E-04 | 0        | 0        | 0.039639 | 3.66E-04 | 0        | 0.063338 | 4.90E-05 | 1.20E-04 | 5.40E-05 | 0.0091   | 0        |
| 0        | 0        | 0        | 0        | 0        | 0        | 0        | 0        | 0        | 0        | 0        | 4.80E-05 | 0        | 0        | 0        |
| 0        | 0        | 0        | 0        | 0        | 0        | 0        | 0        | 0.002833 | 0        | 0        | 9.80E-05 | 0        | 2.08E-04 | 0        |
| 7.64E-04 | 3.90E-05 | 0        | 0.003743 | 2.41E-04 | 0        | 0        | 0        | 2.40E-05 | 0        | 0        | 4.00E-05 | 0        | 0        | 0        |
| 0        | 0        | 0        | 0.001107 | 0        | 0        | 0        | 0        | 0        | 0        | 0        | 4.90E-05 | 0        | 0        | 0        |
| 0        | 0        | 0        | 0        | 6.72E-04 | 0        | 0        | 0        | 2.20E-05 | 0        | 0        | 0        | 0        | 0        | 0        |
| 1.75E-04 | 5.20E-05 | 3.50E-05 | 2.40E-05 | 0        | 0        | 0        | 2.10E-05 | 2.70E-05 | 0        | 0        | 2.00E-05 | 0        | 0        | 0        |
| 0        | 0        | 0        | 0        | 3.83E-04 | 0        | 5.30E-05 | 5.10E-05 | 0        | 0        | 0        | 3.20E-05 | 0        | 0        | 0        |
| 0.001616 | 3.70E-05 | 0        | 0        | 0.001902 | 0        | 6.05E-04 | 0        | 4.10E-05 | 0        | 0        | 0        | 0        | 0        | 0        |
| 0        | 0        | 0        | 0        | 0        | 0        | 0        | 0        | 0        | 0        | 0        | 0        | 0        | 0        | 0        |
| 9.50E-05 | 0        | 0        | 1.38E-04 | 4.00E-05 | 2.00E-05 | 0        | 0        | 1.37E-04 | 0.006647 | 3.26E-04 | 4.17E-04 | 2.30E-05 | 0.036283 | 1.74E-04 |
| 0        | 0        | 0        | 0        | 3.40E-05 | 0        | 0        | 0        | 0        | 0        | 0        | 0        | 0        | 0        | 0.001116 |
| 0        | 0        | 0        | 0        | 0        | 0        | 0        | 0        | 0        | 0        | 0        | 0        | 0        | 0        | 0        |
| 0        | 0        | 0        | 0        | 0        | 0        | 0        | 0        | 0        | 0        | 0        | 0        | 0        | 0        | 0        |
| 0        | 0        | 0        | 0        | 0        | 0        | 0.033805 | 0        | 0        | 0        | 0        | 5.10E-05 | 0        | 0        | 0        |
| 0        | 0        | 0        | 1.70E-05 | 1.30E-04 | 0        | 3.30E-05 | 0        | 0        | 0        | 0        | 0        | 0        | 0        | 0        |
| 1.57E-04 | 2.20E-05 | 0        | 3.10E-05 | 0        | 2.78E-04 | 9.30E-05 | 0        | 4.80E-05 | 1.56E-04 | 3.29E-04 | 0        | 2.20E-05 | 0.011094 | 0        |
| 0        | 0        | 1.23E-04 | 0        | 0        | 0        | 0        | 0        | 0        | 5.20E-05 | 0        | 0        | 0        | 0        | 0        |
| 6.20E-05 | 4.20E-04 | 5.18E-04 | 1.40E-04 | 3.50E-05 | 5.31E-04 | 3.20E-05 | 9.15E-04 | 2.62E-04 | 0.002958 | 7.67E-04 | 0.011372 | 8.90E-05 | 0.001251 | 2.66E-04 |
| 3.37E-04 | 1.21E-04 | 0        | 2.30E-05 | 4.10E-05 | 1.13E-04 | 0        | 5.08E-04 | 4.26E-04 | 0.011503 | 2.50E-05 | 0        | 5.08E-04 | 0.001833 | 5.80E-04 |
| 4.63E-04 | 3.60E-05 | 0        | 9.70E-05 | 0        | 7.13E-04 | 3.40E-05 | 2.52E-04 | 2.06E-04 | 0.018173 | 7.00E-04 | 1.60E-05 | 0        | 6.80E-05 | 1.65E-04 |
| 0        | 0        | 0        | 0        | 0        | 0.006658 | 0.001179 | 0        | 0        | 0        | 0.01072  | 0        | 0        | 0        | 0        |
| 2.40E-05 | 0        | 0        | 0        | 0        | 0        | 9.81E-04 | 0        | 0        | 0        | 0        | 0        | 0        | 0        | 0        |
| 0        | 0        | 0        | 0        | 0        | 0        | 0        | 0        | 0        | 0        | 0        | 0        | 0        | 0        | 0        |
| 0.004981 | 0.002663 | 0.001808 | 0.00327  | 0.004278 | 0.004673 | 0.002052 | 0.020633 | 0.004303 | 0.027792 | 0.003806 | 0.022594 | 9.83E-04 | 0.012595 | 9.29E-04 |

| CP08     | CP11     | CP06     | CP31     | CP03     | CP24     | CP17     | CP15     | CP02     | CP23     | CPR17    | CPR03    | CPR08    | CPR11    | CPR10    |
|----------|----------|----------|----------|----------|----------|----------|----------|----------|----------|----------|----------|----------|----------|----------|
| 0.002575 | 0.001054 | 8.36E-04 | 5.41E-04 | 5.07E-04 | 4.44E-04 | 2.31E-04 | 1.53E-04 | 6.50E-05 | 2.50E-05 | 0.890789 | 0.85981  | 0.858138 | 0.775461 | 0.760073 |
| 0.012779 | 7.63E-04 | 0.03504  | 6.70E-05 | 7.40E-05 | 0        | 0        | 0        | 9.50E-05 | 4.00E-05 | 0        | 0        | 0.045201 | 0        | 2.92E-04 |
| 0.081568 | 0.06721  | 0.922572 | 0        | 4.60E-04 | 0        | 0.003091 | 1.58E-04 | 8.85E-04 | 6.80E-05 | 0.022065 | 2.70E-04 | 5.80E-05 | 7.50E-05 | 5.33E-04 |
| 0.032404 | 0.002869 | 0.006005 | 3.60E-05 | 5.36E-04 | 3.60E-05 | 0.020696 | 0.638001 | 1.01E-04 | 0        | 0.004553 | 0.033987 | 0.027994 | 0.065761 | 0.020732 |
| 0.009555 | 0.006111 | 0        | 0.988449 | 0.842888 | 6.60E-05 | 0.003791 | 0        | 0.004159 | 1.30E-05 | 0.001878 | 0.011692 | 0.005174 | 0        | 0        |
| 0        | 2.60E-05 | 0.002773 | 0        | 3.40E-05 | 2.80E-05 | 0.002072 | 0        | 0        | 5.60E-05 | 0        | 0        | 0        | 0        | 0        |
| 0.223586 | 0.00737  | 0.013917 | 1.32E-04 | 6.90E-05 | 0        | 0.038646 | 4.20E-05 | 3.28E-04 | 0        | 0.004846 | 0.013202 | 0.007539 | 3.24E-04 | 0.010388 |
| 3.10E-05 | 0.870406 | 0        | 0        | 0.005649 | 0        | 0.903709 | 4.50E-05 | 0        | 0        | 0        | 0.002309 | 0        | 0        | 0        |
| 0.008267 | 0.00116  | 5.81E-04 | 0        | 0.0287   | 0        | 1.18E-04 | 0        | 3.70E-05 | 0        | 0.001153 | 0.002626 | 3.29E-04 | 5.10E-05 | 0.063813 |
| 0        | 0        | 8.28E-04 | 0.004943 | 0        | 0.008415 | 0        | 2.00E-05 | 1.01E-04 | 0        | 0.015339 | 0        | 0        | 0.061212 | 0        |
| 0.100317 | 0        | 4.55E-04 | 6.10E-05 | 0        | 3.50E-05 | 1.60E-05 | 1.90E-05 | 1.65E-04 | 0        | 0.012036 | 0        | 0        | 0        | 0.001589 |
| 0.004798 | 0        | 9.70E-05 | 6.00E-05 | 0.009209 | 0.002968 | 0.00277  | 0.062043 | 0.350637 | 0.005945 | 3.00E-05 | 0        | 1.91E-04 | 2.95E-04 | 0        |
| 0        | 2.90E-05 | 0        | 5.90E-05 | 1.03E-04 | 0.9813   | 2.30E-05 | 0        | 0.00664  | 0.9747   | 0        | 0        | 0        | 0        | 0        |
| 0        | 2.50E-05 | 0        | 9.70E-05 | 2.70E-05 | 0        | 0        | 0        | 0.570012 | 0        | 4.51E-04 | 0        | 0        | 0        | 0.007165 |
| 0.013814 | 4.75E-04 | 0.004007 | 8.00E-05 | 0        | 0        | 3.45E-04 | 0        | 3.40E-05 | 2.00E-05 | 0.003098 | 0        | 1.60E-05 | 0        | 0.001655 |
| 0        | 0        | 9.70E-05 | 0        | 1.52E-04 | 0        | 0        | 0        | 0        | 0        | 2.18E-04 | 0.001169 | 0.001271 | 0        | 0.040539 |
| 0.024748 | 0.032306 | 8.80E-05 | 0        | 0        | 0        | 1.74E-04 | 0.001518 | 0        | 0        | 0.001875 | 5.20E-05 | 3.04E-04 | 9.90E-05 | 7.53E-04 |
| 0        | 0        | 0        | 1.27E-04 | 0        | 0        | 0        | 0        | 1.29E-04 | 0        | 0        | 0        | 0        | 0        | 1.43E-04 |
| 0.005678 | 3.37E-04 | 7.69E-04 | 3.40E-05 | 0        | 2.70E-05 | 0        | 0        | 0        | 2.40E-05 | 8.20E-05 | 0        | 2.30E-05 | 0        | 0.002037 |
| 1.03E-04 | 0        | 2.40E-05 | 0        | 4.37E-04 | 0        | 2.90E-05 | 0        | 0        | 4.00E-05 | 0.00373  | 0.015138 | 0.006451 | 0.014713 | 0.009994 |
| 0.412912 | 9.90E-05 | 3.30E-05 | 0        | 0        | 0        | 9.40E-05 | 2.88E-04 | 3.20E-05 | 0        | 0.001316 | 1.38E-04 | 0.002371 | 0        | 0.001541 |
| 3.28E-04 | 0        | 0.001522 | 0        | 0        | 0        | 0.001583 | 0        | 0        | 0        | 0.002864 | 2.31E-04 | 0.004455 | 2.30E-05 | 0.006946 |
| 0        | 0        | 0        | 0        | 0        | 0        | 0        | 0        | 0        | 0        | 0.016403 | 0        | 0.009502 | 6.70E-05 | 0        |
| 0        | 0        | 0        | 0        | 0.05411  | 0        | 2.60E-05 | 0.085615 | 2.18E-04 | 0        | 4.48E-04 | 4.90E-05 | 0        | 0        | 0        |
| 9.40E-05 | 0.002539 | 1.50E-05 | 0        | 0        | 0        | 0        | 0        | 0        | 0        | 0        | 0        | 2.97E-04 | 0        | 0        |
| 0        | 0        | 0        | 0        | 0.018822 | 6.20E-05 | 0        | 0.042653 | 8.45E-04 | 0        | 1.27E-04 | 4.40E-05 | 0        | 0.066548 | 3.57E-04 |
| 0        | 3.40E-05 | 0        | 0        | 3.70E-05 | 1.46E-04 | 0        | 0        | 0        | 0        | 0        | 0.030135 | 0.008485 | 0        | 3.64E-04 |
| 0.008427 | 1.68E-04 | 0.001255 | 3.20E-05 | 0        | 0        | 5.60E-05 | 0        | 3.40E-05 | 0        | 3.74E-04 | 0        | 6.41E-04 | 2.50E-05 | 2.60E-05 |
| 3.30E-05 | 0        | 0        | 2.51E-04 | 5.30E-05 | 3.40E-05 | 0        | 2.50E-05 | 0        | 0        | 0.005254 | 0.003999 | 0.005345 | 4.51E-04 | 0.01636  |
| 0        | 0        | 0        | 0        | 0        | 0        | 0        | 0        | 3.80E-05 | 0        | 0        | 0        | 0        | 0        | 0        |
| 9.60E-04 | 6.20E-05 | 1.49E-04 | 0        | 1.43E-04 | 4.18E-04 | 1.80E-04 | 0.003321 | 0.005383 | 0        | 0        | 0        | 2.10E-05 | 3.20E-04 | 0        |
| 0.016373 | 8.39E-04 | 2.28E-04 | 0        | 0        | 3.10E-05 | 0.006518 | 0.083073 | 0        | 2.40E-05 | 1.03E-04 | 6.48E-04 | 6.85E-04 | 0.001219 | 6.20E-04 |
| 5.80E-05 | 0        | 4.70E-05 | 0        | 0        | 1.99E-04 | 9.73E-04 | 0.008486 | 0.007555 | 3.20E-05 | 0        | 0        | 0        | 0        | 0        |
| 4.86E-04 | 0        | 0        | 3.40E-05 | 0        | 0        | 0        | 0        | 0        | 0        | 0        | 0        | 0        | 0        | 0        |
| 0        | 0        | 0        | 4.40E-05 | 0        | 0        | 0        | 0        | 9.80E-05 | 3.10E-05 | 0        | 0        | 0        | 0        | 0        |
| 0.001015 | 3.51E-04 | 3.23E-04 | 2.30E-05 | 0        | 0        | 9.24E-04 | 0        | 5.50E-05 | 0        | 2.96E-04 | 0        | 5.31E-04 | 6.39E-04 | 0.008495 |
| 0.024794 | 0.0022   | 1.90E-05 | 2.50E-05 | 0        | 0        | 0.005662 | 0        | 1.03E-04 | 0        | 3.41E-04 | 0        | 1.78E-04 | 0        | 0.001465 |
| 0        | 0        | 0        | 0        | 0        | 0        | 0        | 0        | 0        | 0        | 0.001754 | 0        | 4.20E-05 | 0        | 6.30E-05 |
| 4.50E-05 | 0        | 0        | 1.29E-04 | 0.02221  | 3.40E-05 | 0        | 0.048057 | 0.011593 | 0.00216  | 2.40E-05 | 0        | 3.20E-05 | 3.00E-05 | 0        |
| 5.30E-05 | 0        | 1.47E-04 | 0        | 4.61E-04 | 0        | 0        | 0        | 3.40E-05 | 0        | 0.002274 | 8.50E-05 | 0.001547 | 0        | 5.95E-04 |
| 0        | 0        | 0        | 3.50E-05 | 0        | 0        | 0        | 0        | 0        | 0        | 0        | 0        | 3.80E-04 | 0        | 0.011316 |
| 3.00E-05 | 7.00E-04 | 0        | 0        | 0        | 0        | 0        | 0        | 0        | 0        | 0        | 0        | 0        | 0        | 0        |
| 7.20E-05 | 0        | 0        | 0        | 9.80E-05 | 4.75E-04 | 0        | 0        | 0.022134 | 0        | 0        | 0        | 0        | 0        | 0        |
| 0.002164 | 7.10E-05 | 5.57E-04 | 3.40E-05 | 3.59E-04 | 0        | 0.001148 | 0.004968 | 0.002135 | 0.012869 | 2.79E-04 | 1.66E-04 | 5.30E-05 | 5.90E-05 | 9.10E-05 |
| 0        | 0        | 1.82E-04 | 2.80E-05 | 0        | 0        | 0        | 0        | 0        | 0        | 0.001127 | 0.018111 | 0.005528 | 0.007503 | 0.015564 |
| 0        | 0        | 0        | 0        | 0        | 0        | 0        | 0        | 0        | 0        | 0        | 0        | 0        | 0        | 0        |
| 0.001118 | 1.18E-04 | 0.001035 | 0        | 0        | 0        | 0        | 3.22E-04 | 6.80E-05 | 0        | 0        | 4.20E-05 | 3.00E-05 | 1.60E-04 | 3.20E-05 |
| 0        | 0        | 4.80E-05 | 0        | 8.00E-05 | 0        | 0        | 0        | 6.20E-05 | 0        | 0.001993 | 0.00569  | 1.62E-04 | 0        | 0.002158 |
| 0        | 3.30E-05 | 0.003727 | 0        | 3.60E-05 | 3.80E-05 | 0        | 0        | 0        | 0        | 0        | 0        | 0        | 0        | 0        |
| 5.80E-05 | 3.20E-05 | 0        | 0        | 0        | 0        | 2.20E-05 | 0        | 0        | 0        | 3.72E-04 | 0        | 0        | 0        | 0        |
| 0        | 0        | 0        | 0        | 0        | 0        | 0        | 0        | 0        | 0        | 0.001555 | 0        | 0.00302  | 0        | 0        |
| 0        | 0        | 0        | 0        | 1.49E-04 | 0        | 0        | 0        | 0        | 2.30E-05 | 0        | 0        | 0        | 0        | 0        |
| 0        | 0        | 0        | 0.004054 | 2.29E-04 | 0        | 0        | 0        | 0        | 0        | 0        | 0        | 0        | 0        | 0        |
| 0        | 0        | 0        | 0        | 0        | 0        | 0        | 0        | 0        | 0        | 7.50E-05 | 0.001004 | 0        | 8.27E-04 | 0        |
| 0        | 0        | 0        | 3.00E-05 | 1.22E-04 | 0        | 0        | 0        | 0        | 2.60E-05 | 0        | 0        | 0        | 0        | 0        |
| 0        | 0        | 0        | 0        | 3.30E-05 | 9.10E-05 | 0        | 0        | 0        | 0        | 0        | 0        | 0        | 0        | 0        |

|          |          |          |          |          |          |          |          |          |          |          |          |          |          |          |
|----------|----------|----------|----------|----------|----------|----------|----------|----------|----------|----------|----------|----------|----------|----------|
| 0        | 0        | 0        | 0        | 0        | 0        | 6.50E-05 | 0        | 2.79E-04 | 1.26E-04 | 0        | 0        | 0        | 0        | 0        |
| 0.001548 | 0        | 0        | 0        | 0        | 0        | 0        | 0        | 0        | 0        | 0        | 0        | 0        | 0        | 0        |
| 0        | 0        | 0        | 0        | 0        | 0        | 0        | 0        | 2.90E-05 | 0        | 0        | 0        | 0        | 0        | 0        |
| 0        | 0        | 0        | 0        | 0        | 0        | 0        | 0        | 0        | 0        | 0        | 0        | 3.72E-04 | 0        | 0.001742 |
| 0        | 0        | 3.40E-05 | 0        | 0        | 0        | 0        | 0        | 0        | 0        | 0        | 0        | 0        | 0        | 0        |
| 0        | 0        | 0        | 0        | 0        | 0        | 0        | 0        | 0        | 0        | 0        | 0        | 0        | 0        | 0        |
| 0        | 0        | 0        | 0        | 0.010164 | 0        | 0        | 0        | 0        | 0        | 0        | 0        | 0        | 0        | 4.60E-05 |
| 2.90E-05 | 0        | 0        | 0        | 0        | 0        | 0        | 0        | 0        | 0        | 7.70E-05 | 0        | 0        | 0        | 9.15E-04 |
| 0        | 0        | 1.50E-05 | 0        | 0        | 0        | 0        | 0        | 0        | 0        | 0        | 0        | 1.88E-04 | 0        | 6.46E-04 |
| 0        | 0        | 0        | 0        | 0        | 0        | 0        | 0        | 0        | 0        | 0        | 0        | 0        | 0        | 0        |
| 1.73E-04 | 0        | 0        | 0        | 4.70E-05 | 3.60E-05 | 0        | 9.05E-04 | 0.002213 | 4.80E-05 | 0        | 0        | 0        | 0        | 0        |
| 0        | 0        | 0        | 0        | 0        | 0        | 0        | 0        | 0        | 0        | 0        | 4.30E-05 | 0        | 0        | 0        |
| 0        | 0        | 0        | 0        | 0        | 0        | 0        | 0        | 0        | 0        | 0        | 0        | 0        | 0        | 0        |
| 1.19E-04 | 0        | 0        | 0        | 0        | 0        | 0        | 0        | 0        | 0        | 0        | 0        | 0        | 0        | 0        |
| 0        | 0        | 0        | 0        | 0        | 0        | 0        | 0        | 0        | 0        | 0        | 0        | 1.24E-04 | 0        | 0        |
| 0        | 0        | 0        | 0        | 3.20E-05 | 0        | 0        | 0        | 0        | 0        | 4.00E-05 | 0        | 3.10E-05 | 0        | 0        |
| 1.58E-04 | 0        | 1.40E-05 | 0        | 3.50E-05 | 0.002165 | 8.90E-05 | 0.006364 | 0.008327 | 2.30E-05 | 0        | 0        | 0        | 1.90E-05 | 0        |
| 0        | 0        | 0        | 0        | 0        | 0        | 0        | 0        | 0        | 0        | 1.40E-04 | 0        | 0        | 0        | 0        |
| 1.56E-04 | 0        | 4.90E-05 | 0        | 4.10E-05 | 0        | 9.80E-05 | 5.32E-04 | 1.65E-04 | 0.001701 | 0        | 0        | 5.50E-05 | 2.80E-05 | 0        |
| 5.16E-04 | 0        | 2.93E-04 | 0        | 2.52E-04 | 0        | 4.67E-04 | 0        | 5.40E-05 | 0        | 2.80E-05 | 1.78E-04 | 0        | 5.40E-05 | 0        |
| 2.70E-04 | 0        | 0        | 0        | 1.75E-04 | 0        | 0.001327 | 7.70E-05 | 2.17E-04 | 2.30E-04 | 0        | 0        | 0        | 5.30E-05 | 0        |
| 0.001358 | 0        | 0        | 0        | 0        | 0        | 0.002084 | 0        | 0        | 0        | 0        | 2.80E-05 | 0        | 0        | 0        |
| 0        | 0        | 3.90E-05 | 0        | 0        | 0        | 0        | 0        | 0        | 0        | 0        | 0        | 0        | 0        | 5.40E-05 |
| 0        | 0        | 0        | 0        | 0        | 0        | 0        | 0        | 0        | 0        | 0        | 0        | 0        | 0        | 0        |
| 0.00643  | 0.002613 | 0.00218  | 5.95E-04 | 0.003467 | 0.002952 | 0.002973 | 0.013277 | 0.004979 | 0.001776 | 6.68E-04 | 8.30E-05 | 0.002232 | 0.004811 | 0.010071 |

| CPR16    | CPR06    | CPR14    | CPR13    | CPR09    | CPR01    | CPR05    | CPR12    | CPR04    | CPR15    | CPR02    | CPR18    | CPR07    | HC70     | HC26     |
|----------|----------|----------|----------|----------|----------|----------|----------|----------|----------|----------|----------|----------|----------|----------|
| 0.717122 | 0.709382 | 0.663219 | 0.634182 | 0.610854 | 0.574327 | 0.349883 | 0.321881 | 0.252598 | 0.208159 | 0.082039 | 0.07697  | 0.00217  | 0.739573 | 0.719395 |
| 0.00312  | 2.50E-05 | 0.049053 | 0.001359 | 0.053859 | 3.01E-04 | 0.209969 | 2.60E-05 | 0.056869 | 3.70E-05 | 0        | 0.442157 | 0        | 0.033924 | 0.056971 |
| 0.017703 | 0.001932 | 0.151191 | 0        | 0.009342 | 6.12E-04 | 0.054107 | 0.432969 | 0.260411 | 9.20E-05 | 0        | 9.80E-04 | 0.001101 | 2.17E-04 | 0        |
| 0.008712 | 0.008009 | 0.004434 | 0.043364 | 0.016353 | 0.0432   | 0.026335 | 0.005268 | 0.014684 | 0.024986 | 0.150482 | 0.026633 | 2.52E-04 | 0.033133 | 0.057799 |
| 0        | 0        | 0        | 0.047653 | 1.23E-04 | 0.009151 | 0        | 0.002038 | 0        | 0.052738 | 0.290548 | 0.117753 | 0.011952 | 0.007346 | 0.00957  |
| 0        | 4.60E-05 | 0        | 0        | 0        | 0        | 0.025455 | 3.20E-05 | 0.140592 | 0        | 0.005869 | 2.29E-04 | 2.80E-05 | 0        | 8.30E-05 |
| 0.003281 | 0.006255 | 0.002694 | 0.006198 | 0.011667 | 0.038    | 0.023607 | 0.016797 | 0.016878 | 0.1179   | 0.037986 | 0.058662 | 2.19E-04 | 0.019789 | 0.033596 |
| 0        | 4.00E-05 | 0.028665 | 6.21E-04 | 5.40E-05 | 0.222526 | 0        | 0        | 6.40E-05 | 4.69E-04 | 1.41E-04 | 0        | 0.304995 | 0        | 0        |
| 4.00E-05 | 0.024439 | 0.006524 | 0.034115 | 0.126707 | 0.009268 | 0.035512 | 0.010104 | 0.019953 | 6.52E-04 | 0        | 0.00189  | 6.30E-05 | 0.002406 | 7.30E-05 |
| 0        | 8.50E-05 | 0        | 0        | 0        | 0        | 0.017508 | 0        | 0.051575 | 0        | 0        | 0        | 0.231163 | 1.26E-04 | 3.80E-05 |
| 5.36E-04 | 0        | 0        | 0.003986 | 0.008028 | 0        | 0.014819 | 0        | 0.054164 | 1.94E-04 | 0        | 2.94E-04 | 5.54E-04 | 0        | 0.007703 |
| 0        | 1.90E-05 | 1.60E-04 | 4.00E-05 | 2.79E-04 | 1.70E-04 | 2.24E-04 | 0        | 6.50E-05 | 2.16E-04 | 3.77E-04 | 0        | 2.60E-05 | 2.93E-04 | 3.60E-05 |
| 0        | 0        | 0        | 0        | 0        | 9.20E-05 | 0        | 0        | 0        | 0        | 0        | 2.60E-05 | 7.40E-05 | 0        | 8.10E-04 |
| 0        | 0        | 0.001176 | 0        | 4.70E-05 | 1.78E-04 | 0        | 0.001585 | 0.01202  | 0        | 0        | 0.032188 | 0.009553 | 3.90E-05 | 0.005376 |
| 5.21E-04 | 0        | 0        | 2.50E-04 | 0.00374  | 0        | 0.039789 | 0        | 0.005446 | 6.42E-04 | 2.07E-04 | 7.30E-05 | 0.00272  | 0.007023 | 0.009909 |
| 0        | 0.001509 | 0.009404 | 0.100431 | 0.021839 | 0.008849 | 0.029394 | 0.103748 | 0.00355  | 0        | 3.07E-04 | 0        | 4.70E-05 | 0.02338  | 0        |
| 9.93E-04 | 1.24E-04 | 1.08E-04 | 9.74E-04 | 0.006166 | 8.90E-05 | 0.005054 | 4.21E-04 | 0.005132 | 0.014638 | 0.001516 | 0.004553 | 9.10E-05 | 0.002248 | 0.001707 |
| 0        | 0        | 0        | 3.80E-04 | 6.88E-04 | 0        | 2.13E-04 | 0        | 0        | 0.246431 | 0        | 0        | 0        | 3.70E-05 | 1.14E-04 |
| 0.00149  | 1.98E-04 | 0.006303 | 0.002694 | 0.00257  | 2.80E-05 | 0.011742 | 0.002346 | 0.001823 | 0        | 0        | 0.042322 | 0        | 2.68E-04 | 0.00476  |
| 0.06485  | 0.004372 | 0.017356 | 0.035863 | 0        | 0.001432 | 0.048161 | 0.028514 | 0.008082 | 2.20E-05 | 0.224479 | 0.005367 | 0        | 0.017071 | 0        |
| 0        | 0        | 2.70E-05 | 2.73E-04 | 0.004812 | 3.90E-05 | 0        | 0        | 6.03E-04 | 0.004507 | 8.00E-05 | 3.23E-04 | 9.00E-05 | 0.005107 | 0        |
| 0.006307 | 7.10E-05 | 4.10E-05 | 0.003316 | 0.001784 | 0.001859 | 0.003626 | 2.90E-05 | 0.001209 | 3.56E-04 | 0.069631 | 0.006146 | 9.20E-05 | 0.005662 | 8.00E-05 |
| 0.140178 | 0        | 0.027124 | 0.016106 | 0        | 0        | 0        | 0.030107 | 0        | 0        | 0.09424  | 0.094125 | 0        | 3.84E-04 | 0.025995 |
| 4.90E-04 | 8.00E-05 | 8.71E-04 | 4.51E-04 | 2.75E-04 | 0        | 6.84E-04 | 0.00216  | 0        | 0.23687  | 0        | 0.022901 | 9.89E-04 | 0        | 0.00117  |
| 0        | 0        | 0.004122 | 0        | 0        | 0        | 0        | 0.009838 | 0.007442 | 4.20E-05 | 0        | 3.99E-04 | 0        | 3.45E-04 | 0        |
| 1.88E-04 | 3.26E-04 | 4.34E-04 | 7.79E-04 | 0.001309 | 0        | 0.002214 | 2.14E-04 | 7.73E-04 | 0.032381 | 0        | 0.001705 | 0.001107 | 1.54E-04 | 0.00162  |
| 0        | 0.180934 | 2.01E-04 | 0        | 0        | 9.07E-04 | 0        | 5.20E-05 | 6.64E-04 | 2.21E-04 | 0.001511 | 0.005788 | 0.424042 | 0.028295 | 3.90E-05 |
| 6.45E-04 | 1.13E-04 | 0        | 1.66E-04 | 6.96E-04 | 0        | 0.01121  | 0.001667 | 9.39E-04 | 0.004111 | 0        | 0.033568 | 0.002761 | 0.004387 | 0        |
| 0.019112 | 0        | 0.003966 | 0.008731 | 3.47E-04 | 0.03687  | 0.030055 | 0.00963  | 0        | 0        | 1.79E-04 | 1.96E-04 | 1.00E-04 | 0.016949 | 0        |
| 0        | 0        | 0        | 0        | 0        | 0        | 0        | 0        | 0        | 0        | 0.003746 | 5.70E-05 | 1.00E-04 | 0        | 9.09E-04 |
| 1.06E-04 | 0        | 8.20E-05 | 5.30E-05 | 0        | 4.61E-04 | 0        | 0        | 3.10E-05 | 6.14E-04 | 7.90E-05 | 2.10E-04 | 4.30E-05 | 1.13E-04 | 0        |
| 1.55E-04 | 0.001446 | 4.77E-04 | 0.003357 | 3.12E-04 | 8.65E-04 | 4.78E-04 | 0.001656 | 6.11E-04 | 0.016715 | 1.50E-04 | 0.002318 | 2.50E-04 | 3.88E-04 | 6.12E-04 |
| 0        | 0        | 0        | 0        | 0        | 0        | 3.50E-05 | 0        | 0        | 4.30E-05 | 0        | 2.90E-05 | 0        | 1.13E-04 | 0        |
| 0        | 2.90E-05 | 0        | 0        | 0.004271 | 0        | 0        | 0        | 0.035201 | 0        | 0        | 2.80E-05 | 0        | 0        | 0        |
| 0        | 0        | 0        | 0        | 0        | 0        | 0        | 0        | 0        | 0.003145 | 0        | 0        | 0        | 0        | 0        |
| 0.005064 | 3.19E-04 | 3.91E-04 | 0.016551 | 5.55E-04 | 5.54E-04 | 0.001269 | 0.005051 | 0.001262 | 0.001901 | 3.00E-04 | 0.001669 | 1.80E-05 | 0.002562 | 1.92E-04 |
| 3.23E-04 | 2.10E-05 | 0.001368 | 3.26E-04 | 0.001138 | 9.70E-05 | 1.78E-04 | 0        | 0.004056 | 0        | 0.005877 | 6.10E-05 | 0        | 1.09E-04 | 0        |
| 0        | 2.20E-05 | 0        | 0        | 0        | 0        | 0        | 0        | 0        | 0        | 0        | 5.30E-05 | 0        | 3.00E-05 | 9.40E-05 |
| 3.50E-05 | 7.80E-05 | 0        | 8.60E-05 | 4.60E-05 | 0        | 8.40E-05 | 4.05E-04 | 4.34E-04 | 0.006477 | 3.00E-05 | 4.69E-04 | 7.68E-04 | 3.17E-04 | 0.008816 |
| 5.21E-04 | 0.001336 | 9.10E-04 | 4.03E-04 | 0.003051 | 6.50E-05 | 8.27E-04 | 1.24E-04 | 0.004426 | 0.001541 | 0.00532  | 9.73E-04 | 7.20E-05 | 0.002071 | 0.002695 |
| 0        | 0.003962 | 0        | 0        | 0.008557 | 0.001909 | 0.028024 | 0        | 0.023282 | 0        | 0        | 0        | 0        | 0.030306 | 0        |
| 0        | 0        | 3.64E-04 | 0        | 4.40E-05 | 0        | 0        | 0        | 0        | 0        | 0        | 0        | 0        | 0        | 0        |
| 0        | 1.58E-04 | 0        | 0        | 0        | 0        | 2.10E-05 | 0        | 0        | 0        | 0        | 0        | 2.10E-05 | 0.003377 | 0        |
| 1.99E-04 | 2.40E-05 | 6.00E-05 | 4.10E-05 | 1.40E-04 | 2.50E-05 | 3.00E-05 | 0        | 1.23E-04 | 3.10E-05 | 1.00E-04 | 0.001034 | 3.30E-05 | 0        | 0        |
| 0        | 0        | 0.004021 | 1.75E-04 | 4.30E-05 | 0.019807 | 0.007572 | 0.00213  | 0        | 0        | 1.18E-04 | 0.006522 | 1.90E-05 | 0.001122 | 1.90E-04 |
| 0        | 0        | 0        | 0        | 0        | 0        | 0        | 0        | 0        | 0        | 0        | 0        | 0        | 0        | 0        |
| 0        | 3.62E-04 | 3.30E-05 | 4.40E-05 | 4.10E-05 | 0        | 1.97E-04 | 0.002415 | 0.001462 | 0.004721 | 0        | 8.70E-05 | 0        | 3.93E-04 | 1.09E-04 |
| 3.08E-04 | 0.01067  | 3.65E-04 | 0.00514  | 0.004006 | 0.001601 | 0.001017 | 8.05E-04 | 7.87E-04 | 0        | 0        | 0        | 0        | 0        | 0        |
| 0        | 0        | 0.009591 | 0.005614 | 4.39E-04 | 2.48E-04 | 0.001341 | 0.002455 | 0        | 0        | 0        | 0        | 0        | 0        | 0        |
| 0.006703 | 0.006654 | 0        | 0        | 0.002379 | 0        | 0        | 0        | 3.04E-04 | 0        | 0        | 2.50E-05 | 1.90E-05 | 3.20E-05 | 0        |
| 0        | 0        | 0        | 0        | 0        | 0        | 0        | 6.00E-05 | 0.00101  | 6.95E-04 | 0        | 2.90E-05 | 0        | 0.002355 | 0.005707 |
| 0        | 0        | 0        | 0        | 0.02256  | 0        | 0.007879 | 0        | 0.002926 | 0        | 0        | 0        | 0        | 0        | 0        |
| 0        | 0        | 0        | 0        | 0        | 0        | 0        | 0        | 0        | 7.70E-05 | 4.79E-04 | 0.001239 | 1.81E-04 | 0        | 2.49E-04 |
| 0        | 3.70E-05 | 4.87E-04 | 0.002692 | 0.004681 | 3.09E-04 | 5.02E-04 | 0.003041 | 0.001727 | 0        | 1.13E-04 | 0        | 0        | 9.15E-04 | 0        |
| 0        | 0        | 0        | 0        | 0        | 0        | 0        | 0        | 0        | 0        | 0        | 0        | 0        | 0        | 0.033849 |
| 0        | 0        | 0        | 9.70E-05 | 0        | 0        | 0        | 0        | 0        | 0        | 0        | 0        | 0        | 0        | 0        |

|          |          |          |          |          |          |          |          |          |          |          |          |          |          |          |          |
|----------|----------|----------|----------|----------|----------|----------|----------|----------|----------|----------|----------|----------|----------|----------|----------|
|          | 0        | 2.10E-05 | 2.30E-05 | 0        | 0        | 0        | 0        | 0        | 0        | 0        | 0        | 0        | 0        | 0        | 0        |
|          | 0        | 0.036066 | 0        | 0        | 0.044291 | 0        | 0        | 0        | 0        | 0        | 0        | 0        | 0        | 0        | 0        |
|          | 0        | 0        | 0        | 0        | 0        | 0        | 0        | 0        | 0        | 0        | 0        | 0        | 0        | 0        | 0        |
|          | 0        | 0        | 0        | 0.002416 | 4.62E-04 | 0.019079 | 0.002639 | 0        | 0        | 0        | 0        | 0        | 0        | 0.001156 | 0        |
|          | 0        | 0        | 2.30E-05 | 0.004932 | 1.55E-04 | 0.001583 | 3.36E-04 | 0        | 0        | 0        | 0        | 8.80E-05 | 0        | 0        | 0        |
|          | 0        | 0        | 0        | 0        | 0        | 0        | 0        | 0        | 0        | 1.33E-04 | 0        | 0        | 0        | 0        | 0        |
|          | 0        | 5.04E-04 | 0        | 0        | 0        | 0        | 0.003032 | 0        | 0.001938 | 0.010362 | 0        | 0        | 0        | 7.50E-05 | 0        |
|          | 0        | 0        | 5.60E-05 | 2.44E-04 | 0.001311 | 0.001582 | 7.13E-04 | 0        | 0        | 0        | 0        | 2.50E-05 | 0        | 0        | 0        |
| 0.001085 | 1.64E-04 | 7.40E-05 | 0.01127  | 2.69E-04 | 8.56E-04 | 0.002812 | 0.001201 | 4.94E-04 | 0        | 0        | 0        | 0        | 0        | 0        | 0        |
|          | 0        | 0        | 0        | 0        | 0        | 0        | 0        | 0        | 0        | 0        | 0        | 0        | 0        | 0        | 0        |
|          | 0        | 0        | 0        | 4.90E-05 | 0        | 0        | 0        | 2.60E-05 | 0        | 2.90E-05 | 0        | 0        | 0        | 0        | 0        |
|          | 0        | 0        | 0        | 0        | 0        | 0        | 0        | 0        | 0        | 4.60E-05 | 0        | 0.00136  | 6.90E-05 | 1.04E-04 | 0        |
|          | 0        | 0        | 0        | 0        | 0        | 0        | 0        | 0        | 0        | 0        | 0        | 0        | 0        | 0        | 0        |
|          | 0        | 0        | 0        | 0        | 0.019206 | 0        | 0        | 0        | 0        | 0        | 0        | 0        | 0        | 0        | 0        |
|          | 0        | 0        | 1.96E-04 | 0        | 0        | 0        | 0        | 0        | 0        | 0        | 0        | 0        | 0        | 0        | 0        |
|          | 0        | 0        | 0        | 0.001052 | 0        | 0        | 0        | 2.52E-04 | 0        | 3.60E-05 | 0.014705 | 0.005634 | 0        | 0        | 0.001308 |
|          | 0        | 4.20E-05 | 0        | 0        | 0        | 0        | 2.80E-05 | 0        | 0        | 1.01E-04 | 1.30E-05 | 0        | 0        | 0        | 0        |
|          | 0        | 0        | 0        | 0        | 0        | 0        | 0        | 4.08E-04 | 0        | 0        | 0        | 0        | 0        | 0        | 0        |
|          | 0        | 0        | 0        | 3.60E-05 | 4.50E-05 | 0        | 3.50E-05 | 0        | 1.80E-05 | 0        | 1.90E-05 | 6.00E-05 | 0        | 0        | 0        |
| 5.60E-05 | 0        | 0        | 3.90E-05 | 0        | 8.00E-05 | 7.00E-05 | 0        | 1.22E-04 | 5.26E-04 | 1.35E-04 | 6.50E-05 | 0        | 0        | 0        | 0        |
|          | 0        | 0        | 2.50E-05 | 0        | 0        | 0        | 1.80E-05 | 0        | 0        | 1.82E-04 | 2.90E-05 | 2.70E-05 | 0        | 0        | 0        |
|          | 0        | 0        | 0        | 0        | 0        | 1.83E-04 | 0        | 0        | 0        | 0        | 1.21E-04 | 0        | 0        | 0        | 0        |
|          | 0        | 2.50E-05 | 0        | 0        | 0        | 3.12E-04 | 0        | 6.50E-05 | 0        | 0        | 0        | 0        | 0        | 0        | 0        |
|          | 0        | 0        | 0        | 0        | 0        | 0        | 0        | 0        | 0        | 0        | 0        | 0        | 0        | 0        | 0        |
| 1.57E-04 | 1.01E-04 | 0.004381 | 0.003451 | 4.59E-04 | 0.002798 | 9.90E-04 | 5.71E-04 | 0.004159 | 0.007036 | 0.008965 | 0.00405  | 0.002927 | 0.006341 | 0.008322 | 0        |

| HC37     | HC31     | HC07     | HC01     | HC16     | HC20     | HC21     | HC51     | HC39     | HC30     | HC56     | HC17     | HC55     | HC49     | HC29     |
|----------|----------|----------|----------|----------|----------|----------|----------|----------|----------|----------|----------|----------|----------|----------|
| 0.709832 | 0.618874 | 0.617744 | 0.578739 | 0.575614 | 0.567877 | 0.561769 | 0.527218 | 0.490697 | 0.477689 | 0.469666 | 0.430462 | 0.424966 | 0.377877 | 0.368488 |
| 0.103184 | 0.027266 | 0.081196 | 0.149818 | 0.0561   | 0.018464 | 0.045284 | 0.147218 | 0.102225 | 0.127258 | 0.10785  | 0.090516 | 0.158365 | 0.159242 | 0.105522 |
| 0.002079 | 0.005587 | 0.006944 | 0.005942 | 0.010056 | 0.002987 | 0.002674 | 0.02939  | 0.018486 | 0.010987 | 0.009987 | 1.47E-04 | 3.90E-05 | 0.016055 | 0.031337 |
| 0.041495 | 0.06468  | 0.056476 | 0.065434 | 0.069238 | 0.044729 | 0.077917 | 0.036197 | 0.052232 | 0.035947 | 0.018236 | 0.115065 | 0.064486 | 0.046021 | 0.155199 |
| 0.001867 | 6.06E-04 | 0.002233 | 6.81E-04 | 2.48E-04 | 6.90E-05 | 4.84E-04 | 0.001247 | 3.50E-05 | 1.53E-04 | 0        | 0        | 8.14E-04 | 4.99E-04 | 9.62E-04 |
| 1.01E-04 | 1.67E-04 | 1.99E-04 | 0        | 0        | 0.079033 | 4.40E-05 | 2.00E-04 | 1.10E-04 | 3.50E-05 | 0.090718 | 0        | 0        | 1.24E-04 | 0        |
| 0.009412 | 0.083123 | 0.03684  | 0.028482 | 0.074912 | 0.016752 | 0.056754 | 0.026159 | 0.042828 | 0.015189 | 0.092437 | 0.093139 | 0.124882 | 0.05198  | 0.045865 |
| 6.55E-04 | 0        | 0        | 0        | 0        | 0.001704 | 0        | 0        | 3.10E-05 | 0.001898 | 0.001832 | 0        | 0        | 0        | 0        |
| 0.004613 | 0.009875 | 0.004621 | 0.006078 | 0.005091 | 0.001197 | 0.009008 | 0.031544 | 0.011309 | 0.046693 | 0.015398 | 0.02551  | 0.001498 | 0.014618 | 0.002082 |
| 0        | 0        | 9.80E-05 | 1.15E-04 | 0        | 0.020404 | 3.90E-05 | 0.001998 | 0        | 0.007972 | 0        | 0        | 2.60E-05 | 0.094197 | 0.120016 |
| 0.017554 | 0.015011 | 0.040179 | 0.014925 | 0.020165 | 0.013986 | 0.019018 | 0.055806 | 0.08712  | 0.010897 | 0.014187 | 0.043442 | 0.082114 | 0.067512 | 0.015905 |
| 3.60E-04 | 1.83E-04 | 4.50E-05 | 7.70E-04 | 8.82E-04 | 6.30E-05 | 4.37E-04 | 4.60E-05 | 8.00E-05 | 2.82E-04 | 3.20E-05 | 0.001976 | 4.76E-04 | 4.50E-04 | 0.00747  |
| 0        | 0        | 0        | 0        | 0        | 0        | 0        | 0        | 0        | 0        | 0        | 0        | 0        | 0        | 0        |
| 0        | 0.001717 | 0.007579 | 7.14E-04 | 0.009572 | 0.003997 | 0.047324 | 0.003207 | 0.006615 | 0.002669 | 6.56E-04 | 0.006129 | 6.90E-04 | 0.002505 | 0.006874 |
| 8.53E-04 | 0.017811 | 0.033297 | 0.018379 | 0.023543 | 0.010185 | 0.01432  | 0.015631 | 0.0131   | 0.012414 | 0.003118 | 0.00771  | 0.030734 | 0.023379 | 0.056151 |
| 0.006017 | 0.016549 | 6.38E-04 | 0        | 0.004428 | 0.042715 | 0.005342 | 0.00167  | 0.007839 | 0.053494 | 0.017526 | 0.002657 | 0        | 0.001564 | 9.01E-04 |
| 0.005403 | 0.012535 | 0.014059 | 0.012665 | 0.02392  | 0.0111   | 0.018052 | 0.020402 | 0.025343 | 0.003117 | 0.010317 | 0.025501 | 0.01764  | 0.016346 | 0.00975  |
| 0        | 0.002522 | 0.014016 | 0.04028  | 0.003474 | 0.034505 | 0.029995 | 0.008069 | 0.023782 | 0.001022 | 0.005695 | 0.009392 | 2.40E-05 | 0.004988 | 0.011317 |
| 0.024327 | 0.015511 | 5.45E-04 | 0.002172 | 0.007911 | 1.72E-04 | 0.003623 | 0.007745 | 0.01142  | 0.007563 | 0.018665 | 0.018448 | 0.017466 | 0.047119 | 0.001043 |
| 0.015141 | 0.024861 | 0.011324 | 0        | 9.39E-04 | 4.70E-05 | 0.010332 | 0        | 0        | 0        | 0.005107 | 0.021603 | 0        | 0.006597 | 0        |
| 1.88E-04 | 0.020598 | 0.00435  | 0.006567 | 0.013769 | 0.001286 | 0.011439 | 0.004909 | 0.006317 | 0.002361 | 7.43E-04 | 0.014723 | 0.022223 | 0.002029 | 0.02166  |
| 0.015543 | 0.005699 | 0.006475 | 0.009334 | 0.011243 | 0.004677 | 0.009211 | 0.007752 | 0.01687  | 0.002434 | 0.002992 | 0.018429 | 0.010417 | 0.006552 | 0.00144  |
| 0.005444 | 0.01202  | 0.004239 | 0.007159 | 0.001274 | 0.012055 | 3.60E-04 | 0.00477  | 0.009969 | 0.007717 | 6.31E-04 | 0.016184 | 0.013412 | 0.004386 | 0.001618 |
| 1.17E-04 | 5.80E-05 | 6.75E-04 | 2.00E-04 | 2.23E-04 | 0        | 0.00148  | 6.93E-04 | 2.40E-05 | 3.10E-05 | 0        | 3.10E-05 | 3.70E-04 | 0.003548 | 1.12E-04 |
| 2.10E-05 | 0.008765 | 0.005153 | 0        | 0.012209 | 2.84E-04 | 0.013574 | 0.018828 | 0.023324 | 0.027862 | 0.007143 | 0.004534 | 0        | 0.007519 | 0        |
| 5.28E-04 | 1.72E-04 | 0.002494 | 7.02E-04 | 1.40E-04 | 3.87E-04 | 0.002939 | 0.005421 | 0.001621 | 0.00129  | 0        | 0.001203 | 3.22E-04 | 0.003122 | 0.003658 |
| 2.50E-05 | 5.48E-04 | 0        | 0.003129 | 1.29E-04 | 0.010272 | 0        | 0        | 0        | 0        | 0.001006 | 1.70E-04 | 0        | 0        | 0        |
| 0.004369 | 5.50E-05 | 0.001637 | 0        | 0.002373 | 1.59E-04 | 0.002336 | 0.001705 | 6.99E-04 | 7.96E-04 | 0.013927 | 0.001383 | 0.001913 | 0.007234 | 0.001194 |
| 0.00658  | 0.013148 | 0.004672 | 0.011688 | 0.003796 | 0.010064 | 0.010995 | 6.05E-04 | 0.00629  | 0.009097 | 0.009393 | 0.002908 | 0.003618 | 0.001934 | 8.11E-04 |
| 0        | 1.10E-04 | 0        | 9.89E-04 | 0        | 0.069884 | 2.28E-04 | 0.00242  | 0        | 0.003787 | 0        | 0.002693 | 0        | 0        | 0        |
| 0        | 0        | 0        | 2.50E-05 | 4.30E-05 | 0        | 7.50E-05 | 0        | 0        | 0        | 0        | 0        | 0        | 6.70E-05 | 2.30E-05 |
| 8.50E-04 | 4.82E-04 | 8.10E-05 | 8.60E-05 | 0        | 0        | 0        | 0        | 3.10E-05 | 3.00E-05 | 0.001966 | 1.79E-04 | 1.00E-04 | 5.50E-05 | 1.38E-04 |
| 0        | 0        | 0        | 0        | 0        | 0        | 4.10E-05 | 0        | 0        | 0        | 0        | 0        | 0        | 0        | 0        |
| 6.30E-05 | 0        | 3.60E-05 | 0.006066 | 0.009369 | 0        | 0.001714 | 4.90E-05 | 0.004246 | 0.014671 | 0.008149 | 1.40E-05 | 4.08E-04 | 0        | 0        |
| 0        | 0        | 0        | 0        | 0        | 0        | 0        | 0        | 0        | 0.034341 | 0        | 2.70E-05 | 0        | 0        | 0        |
| 0.00536  | 0.002848 | 0.004893 | 0.002529 | 0.00253  | 0.00164  | 0.003671 | 0.006378 | 0.003448 | 0.011721 | 0.004385 | 0.007194 | 0.00365  | 0.002939 | 1.43E-04 |
| 0.001185 | 8.48E-04 | 0.005008 | 0.002194 | 0.006259 | 0.002972 | 0.002605 | 0.002239 | 0.001662 | 0.001285 | 0.00211  | 0.003921 | 0.001964 | 0.002679 | 0.005681 |
| 9.70E-05 | 1.66E-04 | 0.001547 | 0.006575 | 0.004689 | 3.26E-04 | 0.001365 | 5.08E-04 | 0.001554 | 9.39E-04 | 8.85E-04 | 0.004322 | 0.008767 | 4.47E-04 | 0.005459 |
| 2.06E-04 | 0        | 4.00E-05 | 0.001091 | 0        | 1.83E-04 | 1.22E-04 | 0        | 0        | 4.80E-05 | 0        | 8.50E-05 | 2.70E-05 | 0.002859 | 1.75E-04 |
| 0.004835 | 0.002788 | 0.002423 | 0.003162 | 0.004456 | 0.004241 | 0.008842 | 0.002199 | 0.002903 | 0.001394 | 0.002279 | 0.002084 | 0.006393 | 0.008985 | 0.006919 |
| 1.14E-04 | 0        | 0.013619 | 0        | 0.022028 | 0        | 0.012863 | 0        | 3.26E-04 | 0.011444 | 0.003553 | 0        | 0        | 0        | 0        |
| 0        | 5.20E-05 | 0        | 0        | 0        | 0        | 5.74E-04 | 0.014326 | 6.40E-05 | 0.001293 | 2.84E-04 | 0        | 0        | 0        | 0        |
| 0        | 0        | 3.95E-04 | 6.90E-05 | 2.12E-04 | 0        | 0        | 2.62E-04 | 7.70E-05 | 0        | 0        | 0        | 2.90E-05 | 0        | 5.98E-04 |
| 0        | 0        | 0        | 0        | 0        | 0        | 0        | 0        | 0        | 0        | 0        | 0        | 0        | 0        | 0        |
| 9.61E-04 | 0.001763 | 1.68E-04 | 0.003601 | 5.16E-04 | 9.71E-04 | 4.50E-05 | 1.51E-04 | 4.06E-04 | 0.001353 | 4.71E-04 | 0.003948 | 2.10E-04 | 2.70E-05 | 0.001373 |
| 0        | 0        | 0        | 0        | 0        | 0        | 0        | 0        | 0        | 0        | 0        | 0        | 0        | 0        | 0        |
| 5.90E-04 | 3.78E-04 | 0.001131 | 0.001015 | 0.001855 | 4.77E-04 | 0.001902 | 0.002344 | 0.001264 | 0.00158  | 8.79E-04 | 0.001404 | 7.07E-04 | 0.004822 | 0.002854 |
| 6.00E-05 | 2.80E-04 | 3.60E-05 | 0        | 0        | 0        | 0        | 1.94E-04 | 2.68E-04 | 0.002354 | 7.52E-04 | 8.08E-04 | 0        | 0        | 0        |
| 1.80E-05 | 0        | 0        | 0        | 2.56E-04 | 0        | 0        | 0        | 0.004411 | 0        | 9.80E-05 | 0        | 0        | 0        | 0        |
| 0        | 0        | 0        | 0        | 0        | 0        | 9.79E-04 | 4.80E-05 | 0.009174 | 0        | 0.010999 | 0        | 0        | 0        | 0        |
| 0.003975 | 3.53E-04 | 0.004819 | 0        | 0.007568 | 5.69E-04 | 0.003151 | 0.001227 | 0.002151 | 1.78E-04 | 6.40E-05 | 0.008846 | 0        | 0.003361 | 3.90E-05 |
| 0        | 0        | 0        | 0        | 0        | 0        | 0        | 0        | 0        | 0        | 0.007508 | 0        | 0        | 0        | 0        |
| 0        | 0        | 0        | 7.10E-05 | 0        | 0        | 0        | 5.20E-05 | 0        | 0        | 0        | 2.10E-05 | 0        | 5.80E-05 | 0        |
| 2.00E-04 | 0.001111 | 0        | 1.92E-04 | 2.15E-04 | 0.003085 | 0.002368 | 0        | 0.001579 | 0.006524 | 0.017767 | 0        | 3.40E-05 | 5.14E-04 | 0        |
| 0        | 0        | 0        | 0        | 0        | 0        | 0        | 0        | 0        | 0        | 0        | 0        | 0        | 0        | 0        |
| 7.00E-06 | 0        | 0        | 0        | 0        | 7.57E-04 | 0        | 0        | 0        | 0.001217 | 0.006533 | 0        | 0        | 0        | 0        |

|          |          |          |          |          |          |          |          |          |          |          |          |          |          |          |   |
|----------|----------|----------|----------|----------|----------|----------|----------|----------|----------|----------|----------|----------|----------|----------|---|
| 0        | 0        | 0        | 0        | 0        | 0        | 0        | 0        | 0        | 0        | 0        | 0        | 0        | 0        | 0        | 0 |
| 0        | 0        | 0        | 0        | 0        | 0        | 4.10E-05 | 0        | 0        | 0        | 0        | 0        | 0        | 0        | 0        | 0 |
| 0        | 0        | 5.30E-05 | 0        | 0        | 0        | 0        | 0        | 0        | 0        | 0        | 0        | 0        | 0        | 0        | 0 |
| 3.67E-04 | 0.00137  | 0        | 0        | 3.48E-04 | 0        | 1.02E-04 | 0        | 0.00194  | 0        | 0.00236  | 1.45E-04 | 0        | 5.90E-05 | 1.70E-04 | 0 |
| 1.07E-04 | 4.53E-04 | 4.10E-05 | 0.002414 | 0        | 2.32E-04 | 8.72E-04 | 2.05E-04 | 2.43E-04 | 0.005231 | 0.001817 | 8.86E-04 | 0        | 4.60E-04 | 0        | 0 |
| 0        | 5.20E-05 | 0        | 0        | 0        | 0        | 8.90E-05 | 0        | 0        | 0        | 0        | 2.10E-05 | 0        | 0        | 3.20E-05 | 0 |
| 3.82E-04 | 0        | 0        | 0.002308 | 0        | 0        | 3.10E-05 | 5.10E-05 | 2.60E-05 | 3.20E-05 | 3.70E-05 | 4.60E-05 | 0        | 2.56E-04 | 1.79E-04 | 0 |
| 0.001002 | 3.68E-04 | 0        | 0        | 1.82E-04 | 0.003454 | 0        | 0        | 0.001316 | 0.018551 | 5.27E-04 | 0        | 0        | 0        | 0        | 0 |
| 0.001874 | 5.47E-04 | 0.001185 | 0.001158 | 1.77E-04 | 0        | 2.50E-04 | 0.001141 | 5.39E-04 | 9.83E-04 | 0.002099 | 0        | 0        | 3.50E-05 | 0        | 0 |
| 0        | 0        | 0        | 0        | 0        | 0        | 0        | 0        | 0        | 0        | 0        | 0        | 0        | 0        | 3.50E-05 | 0 |
| 2.40E-05 | 0        | 0        | 0        | 0        | 0        | 0        | 0        | 0        | 0        | 0        | 0        | 0        | 5.70E-05 | 0        | 0 |
| 2.20E-04 | 5.90E-05 | 3.40E-05 | 0.001504 | 0        | 0        | 0        | 0        | 0        | 0        | 0        | 6.60E-05 | 0        | 0        | 0        | 0 |
| 0        | 0        | 0        | 0        | 0        | 0        | 0        | 0        | 0        | 0        | 0        | 0        | 0        | 0        | 0        | 0 |
| 0        | 0        | 0        | 0        | 0        | 0        | 0        | 0.003161 | 0        | 0        | 0        | 0        | 0        | 0        | 0        | 0 |
| 0        | 0        | 0        | 0        | 0        | 0        | 0        | 0        | 0        | 0        | 0        | 0        | 0        | 2.70E-05 | 0        | 0 |
| 2.40E-05 | 0        | 8.40E-05 | 5.60E-05 | 0        | 0        | 0        | 4.70E-05 | 0        | 2.60E-05 | 0        | 0        | 5.30E-05 | 0        | 0        | 0 |
| 0        | 0        | 0        | 0        | 0        | 0        | 0        | 0        | 0        | 0        | 0        | 0        | 0        | 0        | 0        | 0 |
| 0        | 0        | 0        | 0        | 5.00E-04 | 0        | 4.61E-04 | 0        | 7.88E-04 | 0        | 0        | 0        | 0        | 0        | 0        | 0 |
| 0        | 0        | 0        | 0        | 0        | 0        | 0        | 0        | 0        | 0        | 0        | 0        | 0        | 0        | 0        | 0 |
| 0        | 0        | 0        | 3.60E-05 | 0        | 0        | 0        | 0        | 0        | 0        | 3.20E-05 | 0        | 0        | 0        | 0        | 0 |
| 0        | 5.60E-05 | 0        | 0        | 0        | 0        | 0        | 0        | 0        | 0        | 0        | 0        | 0        | 0        | 0        | 0 |
| 6.20E-05 | 1.10E-04 | 0        | 0        | 0        | 0        | 0        | 0        | 0        | 0        | 0        | 0        | 0        | 0        | 0        | 0 |
| 0        | 0        | 0        | 0        | 0        | 0        | 0        | 0        | 0        | 7.30E-05 | 7.50E-05 | 0        | 0        | 0        | 0        | 0 |
| 0        | 0        | 0        | 0        | 0        | 0        | 0        | 0        | 0        | 0        | 0        | 0        | 0        | 0        | 0        | 0 |
| 0.001709 | 0.007865 | 0.006679 | 8.86E-04 | 0.007548 | 0.002039 | 0.002859 | 0.004568 | 0.003218 | 0.014078 | 0.007109 | 0.012028 | 0.001163 | 0.004896 | 0.006807 | 0 |

| HC57     | HC69     | HC14     | HC34     | HC71     | HC03     | HC04     | HC64     | HC33     | HC63     | HC66     | HC28     | HC67     | HC36     | HC65     |
|----------|----------|----------|----------|----------|----------|----------|----------|----------|----------|----------|----------|----------|----------|----------|
| 0.36845  | 0.361255 | 0.353842 | 0.341713 | 0.339626 | 0.338933 | 0.335924 | 0.329947 | 0.318218 | 0.317541 | 0.308808 | 0.305411 | 0.299783 | 0.298263 | 0.294123 |
| 0.140426 | 0.021485 | 0.198623 | 0.342763 | 0.111292 | 0.168146 | 0.002058 | 0.079674 | 2.10E-05 | 0.172363 | 0.025991 | 0.350891 | 0.079052 | 0.105705 | 0.109493 |
| 0.018143 | 0.01299  | 0.001537 | 0.00105  | 0.025066 | 0.007655 | 0        | 0.002694 | 0.009323 | 2.29E-04 | 0.014526 | 0.0359   | 0.010998 | 0.0193   | 0.019488 |
| 0.07359  | 0.18418  | 0.318595 | 0.078542 | 0.068251 | 0.107267 | 0.197534 | 0.019706 | 0.031556 | 0.10544  | 0.041924 | 0.05929  | 0.071534 | 0.125673 | 0.051996 |
| 0.00232  | 7.76E-04 | 0.002148 | 0        | 1.44E-04 | 1.12E-04 | 0.249672 | 2.03E-04 | 0.106012 | 7.58E-04 | 6.57E-04 | 1.49E-04 | 5.70E-05 | 3.20E-05 | 0.004133 |
| 0        | 3.30E-05 | 2.80E-05 | 1.37E-04 | 4.86E-04 | 2.26E-04 | 5.50E-05 | 4.57E-04 | 0        | 3.06E-04 | 0        | 3.60E-05 | 0.001242 | 1.05E-04 | 2.36E-04 |
| 0.023499 | 0.064928 | 0.018026 | 0.098458 | 0.07042  | 0.040621 | 0.111611 | 0.0244   | 0.284157 | 0.066826 | 0.025318 | 0.056836 | 0.033229 | 0.115368 | 0.045791 |
| 0        | 0        | 0        | 0        | 0        | 0        | 0        | 0        | 2.20E-05 | 0        | 0.064035 | 0        | 0        | 0        | 0        |
| 3.30E-05 | 0.016014 | 0.001307 | 0.003444 | 0.096897 | 0.014804 | 1.45E-04 | 0.001591 | 0.001271 | 0.021427 | 0.097533 | 0.005988 | 0.019994 | 0.008893 | 0.010923 |
| 0.242144 | 0.143654 | 0        | 0        | 2.16E-04 | 5.40E-05 | 2.80E-05 | 0.215589 | 2.10E-05 | 0        | 0        | 3.90E-05 | 4.05E-04 | 1.02E-04 | 0.006682 |
| 0        | 0.034772 | 0.00146  | 0        | 0.03517  | 0.045723 | 6.40E-05 | 0.024469 | 2.20E-05 | 0.02005  | 0.001745 | 0.030462 | 0.055054 | 0.017241 | 0.008437 |
| 4.28E-04 | 2.31E-04 | 7.89E-04 | 3.60E-05 | 0.001234 | 1.93E-04 | 0.00112  | 4.89E-04 | 5.86E-04 | 1.55E-04 | 3.13E-04 | 0.001059 | 8.63E-04 | 1.35E-04 | 3.63E-04 |
| 0        | 4.60E-05 | 0        | 0        | 0        | 0        | 1.43E-04 | 0        | 4.33E-04 | 6.20E-05 | 0        | 0        | 0        | 0        | 2.50E-05 |
| 0        | 0.001148 | 4.45E-04 | 0.003352 | 4.71E-04 | 0.03294  | 1.60E-05 | 0.012766 | 0.127128 | 0.003798 | 0.022517 | 0.007935 | 0.006876 | 0.072115 | 0.019906 |
| 0        | 0.031612 | 0.012358 | 0        | 0.013117 | 0.03622  | 1.99E-04 | 0.036997 | 2.50E-05 | 0.029596 | 0.002858 | 0.02077  | 0.018675 | 0.003843 | 0.00621  |
| 0        | 0.011075 | 0        | 0.004501 | 0.063904 | 0.015021 | 1.90E-05 | 0.002251 | 0        | 0.009469 | 0.126297 | 0.001246 | 0.003744 | 0.003968 | 0.01251  |
| 0.006125 | 0.015062 | 0.010629 | 0.015199 | 0.029433 | 0.026127 | 7.19E-04 | 0.01095  | 0.010972 | 0.041059 | 0.008317 | 0.023444 | 0.029961 | 0.047039 | 0.013957 |
| 0.008824 | 0.003577 | 0.008859 | 0.001151 | 0.009568 | 0.046866 | 3.34E-04 | 0.10874  | 0        | 0.01822  | 0.001895 | 0.015593 | 0.014524 | 0.001463 | 2.34E-04 |
| 0.001748 | 0.007544 | 0.019784 | 0.001028 | 0.011659 | 0.004002 | 3.90E-05 | 0.010953 | 0        | 0.04575  | 0.007984 | 0.02114  | 0.004027 | 0.017742 | 0.005417 |
| 0.023259 | 0.002145 | 0        | 0.023039 | 0.016215 | 0        | 0.053701 | 0.00232  | 1.70E-05 | 0        | 0.012363 | 0        | 4.50E-04 | 7.45E-04 | 0.010569 |
| 6.90E-05 | 0.0012   | 0.005219 | 0.019316 | 0.002912 | 0.014538 | 0        | 0.004256 | 0        | 0.006182 | 0.002739 | 0.005836 | 0.005989 | 0.032388 | 7.11E-04 |
| 0.020387 | 0.010735 | 0.008423 | 0.009845 | 0.011132 | 0.005748 | 0.002945 | 0.003046 | 0        | 0.016388 | 0.003943 | 0.007097 | 0.006943 | 0.020904 | 0.004945 |
| 0.005257 | 0.003621 | 0        | 0.010028 | 0.019346 | 0.012004 | 0        | 4.50E-05 | 0.033357 | 0        | 0.00353  | 0.005182 | 6.24E-04 | 4.20E-05 | 0.015518 |
| 8.56E-04 | 0        | 3.83E-04 | 1.59E-04 | 0.004202 | 0.003332 | 0.00237  | 0.014114 | 0        | 3.41E-04 | 0.009916 | 0.002425 | 0.003987 | 0        | 3.16E-04 |
| 0.011881 | 0.01984  | 0        | 0        | 0.021245 | 0.019016 | 2.30E-05 | 0.005529 | 0        | 0.057432 | 0.008332 | 0.011996 | 0.014833 | 0.002386 | 0.011431 |
| 0.002142 | 3.80E-04 | 0.012864 | 0.001569 | 0.001753 | 0.016392 | 0.009337 | 0.019957 | 0        | 0.003256 | 0.018748 | 6.00E-05 | 0.002409 | 0.001164 | 0.00307  |
| 3.50E-05 | 0        | 4.10E-05 | 0.006443 | 0        | 0        | 9.10E-05 | 0        | 0        | 0        | 7.60E-05 | 0        | 5.20E-05 | 0        | 1.97E-04 |
| 0.001062 | 2.90E-04 | 6.02E-04 | 0.002177 | 0.005165 | 9.58E-04 | 6.10E-04 | 0.001533 | 1.90E-05 | 0.001632 | 0.001569 | 9.71E-04 | 0.021762 | 0.004456 | 0.00198  |
| 0.004889 | 0.008725 | 0.002982 | 0.014932 | 0.010345 | 0        | 0.005785 | 0.001182 | 0.014383 | 0        | 0.018817 | 0.003343 | 0.001531 | 0.009496 | 0.005152 |
| 0        | 0        | 0        | 3.00E-05 | 0        | 0.001624 | 0.001621 | 0.006359 | 0.035997 | 3.40E-05 | 3.20E-05 | 3.90E-05 | 0        | 0        | 4.70E-04 |
| 1.12E-04 | 4.00E-05 | 0        | 0        | 0        | 6.70E-05 | 6.95E-04 | 1.96E-04 | 1.44E-04 | 0        | 1.36E-04 | 4.10E-05 | 0        | 0        | 5.90E-05 |
| 0.001554 | 5.50E-05 | 5.04E-04 | 7.16E-04 | 0        | 2.87E-04 | 0.002222 | 5.70E-05 | 2.81E-04 | 9.30E-05 | 3.07E-04 | 6.60E-05 | 0        | 3.40E-05 | 1.69E-04 |
| 0        | 0        | 0        | 3.10E-05 | 0        | 0        | 2.77E-04 | 4.20E-05 | 2.17E-04 | 0        | 0        | 3.00E-05 | 0        | 0        | 0        |
| 0        | 0.006095 | 0        | 0        | 0        | 0.006641 | 1.01E-04 | 0.001509 | 1.20E-04 | 0.024656 | 0.010417 | 0.004464 | 0        | 0.019923 | 5.60E-05 |
| 0        | 0.002603 | 0        | 0        | 0        | 6.10E-05 | 0        | 0.024037 | 0        | 0        | 0        | 0        | 0        | 0.022002 | 0.260573 |
| 3.10E-04 | 0.001523 | 4.66E-04 | 0.002237 | 0.003756 | 0.001783 | 4.75E-04 | 9.77E-04 | 0.001839 | 0.002821 | 0.008018 | 3.35E-04 | 0.002382 | 0.010954 | 0.013592 |
| 1.13E-04 | 0.002371 | 1.20E-04 | 0.00164  | 0.003468 | 0.005458 | 3.27E-04 | 0.0022   | 3.60E-05 | 0.00798  | 7.16E-04 | 0.002433 | 0.005963 | 0.01017  | 0.019198 |
| 0        | 0.002571 | 0        | 0.002567 | 0.001284 | 0.003088 | 0        | 1.38E-04 | 0        | 0.01143  | 5.80E-04 | 0.002772 | 0.002301 | 0.002632 | 0.005191 |
| 0.00144  | 1.01E-04 | 8.30E-05 | 0        | 2.35E-04 | 6.03E-04 | 4.60E-05 | 0.004116 | 6.61E-04 | 3.24E-04 | 0        | 4.05E-04 | 2.34E-04 | 6.70E-05 | 3.10E-05 |
| 0.002535 | 0.004106 | 9.42E-04 | 0.006706 | 0.003729 | 0.002976 | 0.003263 | 0.006981 | 0.011844 | 8.66E-04 | 0.001206 | 0.007436 | 0.005786 | 0.002701 | 0.002693 |
| 0        | 0        | 6.29E-04 | 0        | 9.41E-04 | 0        | 0        | 0.001328 | 0        | 0        | 0.016204 | 2.69E-04 | 0.008109 | 0.002234 | 0.010686 |
| 0        | 2.45E-04 | 0        | 0        | 7.25E-04 | 0        | 2.20E-05 | 0        | 0        | 2.64E-04 | 0.009716 | 0        | 0.003353 | 0        | 7.50E-04 |
| 0        | 2.99E-04 | 0        | 0        | 1.40E-04 | 0        | 1.60E-05 | 2.38E-04 | 1.40E-05 | 6.50E-05 | 7.40E-05 | 2.01E-04 | 5.70E-05 | 1.99E-04 | 2.26E-04 |
| 0        | 0        | 0        | 0        | 0        | 0        | 0        | 0        | 0        | 0        | 0        | 0        | 0        | 0        | 0        |
| 0        | 2.71E-04 | 1.40E-04 | 0.001579 | 5.17E-04 | 0.00473  | 1.16E-04 | 2.52E-04 | 7.34E-04 | 8.04E-04 | 0.006986 | 3.27E-04 | 0        | 0.001212 | 0.001618 |
| 0        | 0        | 0        | 0        | 0        | 0        | 0        | 0        | 0        | 0        | 0        | 0        | 0.226961 | 0        | 0        |
| 0.003644 | 0.002628 | 0.003279 | 4.56E-04 | 0.003161 | 0.002627 | 3.17E-04 | 0.004196 | 9.20E-05 | 0.004381 | 6.01E-04 | 0.004271 | 0.003267 | 0.002185 | 2.44E-04 |
| 0        | 2.61E-04 | 0        | 3.49E-04 | 6.62E-04 | 5.30E-05 | 0        | 0        | 0        | 1.00E-04 | 0.001542 | 0        | 9.07E-04 | 9.10E-05 | 2.20E-04 |
| 0        | 9.63E-04 | 0        | 0        | 2.21E-04 | 0        | 0        | 0        | 0        | 0        | 0.055012 | 0        | 0.001087 | 0        | 0        |
| 0.027812 | 0        | 0.013695 | 0        | 0        | 0        | 0        | 0        | 0        | 0        | 0        | 0        | 0.002271 | 0        | 0        |
| 0        | 9.81E-04 | 0        | 6.60E-05 | 1.87E-04 | 4.44E-04 | 0.009776 | 0.003022 | 0        | 0.001947 | 0.00526  | 7.96E-04 | 5.30E-05 | 0.001339 | 1.93E-04 |
| 0        | 0        | 0        | 0        | 0        | 0        | 0        | 0        | 0        | 0        | 0        | 0        | 0.010842 | 0        | 0        |
| 0        | 0        | 0        | 0        | 0        | 0        | 2.05E-04 | 0        | 0.002152 | 0        | 0        | 0        | 0        | 0        | 0        |
| 0.001165 | 0.001993 | 1.30E-04 | 3.87E-04 | 0.002225 | 1.64E-04 | 0        | 1.05E-04 | 0        | 3.33E-04 | 0.004434 | 1.13E-04 | 0.003707 | 0.001165 | 5.22E-04 |
| 0        | 0        | 0        | 0        | 0        | 0.009677 | 0        | 2.75E-04 | 0        | 0        | 0        | 1.05E-04 | 0        | 0        | 0.010562 |
| 0        | 7.87E-04 | 0        | 0        | 4.32E-04 | 0        | 0        | 0        | 0        | 1.41E-04 | 0.011023 | 0        | 0.002132 | 0        | 0        |

|          |          |          |          |          |          |          |          |          |          |          |          |          |          |          |   |
|----------|----------|----------|----------|----------|----------|----------|----------|----------|----------|----------|----------|----------|----------|----------|---|
| 0        | 0        | 0        | 0        | 0        | 0        | 6.10E-05 | 0        | 0        | 0        | 0        | 0        | 0        | 0        | 0        | 0 |
| 0        | 0        | 0        | 0        | 0        | 0        | 0        | 0        | 0        | 0        | 0        | 0        | 0        | 0        | 0        | 0 |
| 0        | 0        | 0        | 0        | 0        | 0        | 0        | 0        | 0        | 0        | 0        | 0        | 0        | 0        | 0        | 0 |
| 0        | 3.03E-04 | 0        | 4.76E-04 | 6.98E-04 | 0        | 0        | 4.80E-05 | 0        | 0        | 0.009613 | 0        | 8.23E-04 | 6.00E-04 | 0        | 0 |
| 0        | 7.20E-05 | 4.50E-05 | 0        | 0.002276 | 0        | 0        | 0        | 1.60E-05 | 0        | 6.12E-04 | 0.001367 | 3.34E-04 | 0.00183  | 0        | 0 |
| 0        | 0        | 7.50E-05 | 6.40E-05 | 0        | 0        | 0        | 0        | 0        | 0        | 3.60E-05 | 0        | 0        | 0        | 0        | 0 |
| 4.00E-05 | 0        | 2.91E-04 | 5.80E-05 | 1.38E-04 | 6.10E-05 | 0        | 9.22E-04 | 0        | 6.80E-05 | 0        | 1.11E-04 | 4.05E-04 | 0        | 4.20E-05 | 0 |
| 0        | 5.24E-04 | 0        | 2.06E-04 | 5.95E-04 | 0        | 0        | 0        | 1.60E-05 | 0.002182 | 0.002016 | 0        | 5.07E-04 | 1.18E-04 | 8.56E-04 | 0 |
| 0        | 5.18E-04 | 2.00E-05 | 2.88E-04 | 6.64E-04 | 0        | 0        | 0        | 0        | 0        | 0.001376 | 1.37E-04 | 4.70E-04 | 0.001033 | 4.30E-05 | 0 |
| 0        | 0.002239 | 0        | 0        | 0        | 0        | 0        | 0        | 0        | 0        | 0        | 0        | 0        | 0        | 0        | 0 |
| 0        | 0        | 0        | 0        | 0        | 0        | 4.30E-05 | 4.50E-05 | 0        | 0        | 0        | 0        | 6.00E-05 | 3.90E-05 | 0        | 0 |
| 0        | 0        | 0        | 0        | 0        | 1.11E-04 | 9.70E-05 | 0        | 0.001017 | 3.10E-05 | 0        | 0        | 0        | 0        | 3.30E-05 | 0 |
| 0        | 0        | 0        | 0        | 0        | 0        | 0        | 0        | 0        | 0        | 0        | 0        | 7.13E-04 | 0        | 0        | 0 |
| 0        | 0        | 0        | 0        | 0        | 0        | 0        | 0        | 0        | 0        | 0        | 0        | 0        | 0        | 0        | 0 |
| 0        | 0        | 0        | 0        | 0        | 5.60E-05 | 0        | 0        | 0        | 0        | 0        | 0        | 0        | 0        | 0        | 0 |
| 3.00E-05 | 0        | 0        | 0        | 0        | 0        | 2.40E-05 | 0        | 0.003588 | 0        | 0        | 0        | 0        | 0        | 1.09E-04 | 0 |
| 0        | 0        | 0        | 0        | 0        | 0        | 1.27E-04 | 0        | 3.80E-05 | 0        | 0        | 0        | 0        | 0        | 3.00E-05 | 0 |
| 0        | 0        | 0        | 0        | 0        | 0        | 0        | 0        | 0        | 0        | 0.00107  | 0        | 0.001096 | 0.005755 | 0        | 0 |
| 0        | 0        | 0        | 0        | 0        | 0        | 0        | 0        | 0        | 0        | 0        | 0        | 0        | 0        | 0        | 0 |
| 3.70E-05 | 0        | 0        | 0        | 4.60E-05 | 1.15E-04 | 6.27E-04 | 0        | 0        | 0        | 7.20E-05 | 0        | 0        | 0        | 2.70E-05 | 0 |
| 0        | 0        | 2.90E-05 | 0        | 0        | 0        | 1.70E-05 | 8.80E-05 | 0        | 0        | 0        | 0        | 0        | 0        | 0        | 0 |
| 0        | 0        | 0        | 0        | 0        | 0        | 0        | 0        | 0        | 0        | 1.15E-04 | 0        | 0        | 0        | 0        | 0 |
| 0        | 3.00E-05 | 0        | 0        | 0        | 0        | 0        | 0        | 0        | 1.53E-04 | 0.001932 | 0        | 0        | 0        | 0        | 0 |
| 0        | 0        | 0        | 0        | 0        | 0        | 0        | 0        | 0        | 0        | 0        | 0        | 0        | 0        | 0        | 0 |
| 0.005641 | 0.011103 | 6.08E-04 | 0.003262 | 0.004631 | 0.002476 | 0.004983 | 0.009011 | 0.003651 | 0.003047 | 0.020143 | 0.001183 | 0.007582 | 0.005149 | 0.007994 | 0 |

| HC02     | HC11     | HC18     | HC09     | HC24     | HC05     | HC06     | HC46     | HC53     | HC15     | HC48     | HC72     | HC54     | HC38     | HC41     |
|----------|----------|----------|----------|----------|----------|----------|----------|----------|----------|----------|----------|----------|----------|----------|
| 0.282843 | 0.2756   | 0.274148 | 0.266725 | 0.263241 | 0.247744 | 0.24434  | 0.21082  | 0.209447 | 0.196858 | 0.196403 | 0.191434 | 0.178511 | 0.174872 | 0.172555 |
| 0.128015 | 0.394537 | 0.12966  | 0.308804 | 0.142607 | 0.001142 | 0.369807 | 0.241877 | 0.339917 | 0.271429 | 0.138829 | 0.034025 | 0.051977 | 0.154356 | 0.229731 |
| 0.012922 | 0.018429 | 2.94E-04 | 0.017592 | 0.007254 | 0        | 0.038527 | 0.005075 | 0.021293 | 0.002474 | 3.14E-04 | 0.02654  | 0.076989 | 0.005473 | 0.006053 |
| 0.015942 | 0.039026 | 0.151561 | 0.089447 | 0.070929 | 0.026857 | 0.026887 | 0.038987 | 0.032503 | 0.078481 | 0.15197  | 0.046996 | 0.059299 | 0.031758 | 0.245492 |
| 0.292524 | 0        | 0.001325 | 9.70E-05 | 3.13E-04 | 0.410534 | 0.002547 | 0.011551 | 2.92E-04 | 1.83E-04 | 0.158586 | 7.97E-04 | 3.35E-04 | 0        | 3.00E-05 |
| 2.20E-05 | 0        | 3.10E-04 | 8.20E-05 | 9.00E-05 | 1.54E-04 | 1.40E-05 | 0        | 1.80E-05 | 1.02E-04 | 1.80E-05 | 1.07E-04 | 0.099996 | 0.338265 | 6.10E-05 |
| 0.011142 | 0.039769 | 0.21799  | 0.055191 | 0.080753 | 0.002032 | 0.038193 | 0.022412 | 0.025147 | 0.090195 | 0.009701 | 0.108207 | 0.043123 | 0.027986 | 0.062095 |
| 0        | 0        | 0        | 4.30E-05 | 3.04E-04 | 0        | 6.24E-04 | 0        | 0        | 0        | 0        | 1.58E-04 | 4.08E-04 | 3.00E-05 | 0        |
| 0.022939 | 0.010667 | 0.030119 | 0.006079 | 0.057413 | 1.00E-04 | 0.021256 | 0.001316 | 0.01138  | 0.004991 | 2.10E-04 | 0.109988 | 0.055326 | 0.014397 | 0.07405  |
| 0        | 0.01969  | 4.90E-05 | 0        | 1.04E-04 | 0        | 0        | 0.064561 | 0        | 4.30E-05 | 0        | 0.002193 | 0.07209  | 0.016926 | 0        |
| 0.108402 | 0.022321 | 8.50E-05 | 0.01746  | 0.063438 | 0        | 0.033241 | 0.045052 | 0.071573 | 0.022375 | 0.018933 | 0.0452   | 0.068603 | 0.064038 | 0.013819 |
| 3.30E-05 | 9.40E-04 | 4.45E-04 | 6.90E-04 | 7.69E-04 | 5.71E-04 | 5.71E-04 | 0.010463 | 0        | 6.21E-04 | 1.68E-04 | 2.27E-04 | 1.24E-04 | 0        | 4.50E-04 |
| 0        | 0        | 4.20E-05 | 0        | 0        | 3.90E-04 | 0        | 0        | 0        | 0        | 0        | 0        | 1.51E-04 | 0        | 0        |
| 9.10E-04 | 0.002986 | 0.02946  | 4.48E-04 | 0.00336  | 5.60E-05 | 6.46E-04 | 0.002769 | 0.034755 | 0.101345 | 0        | 1.85E-04 | 7.75E-04 | 2.55E-04 | 5.60E-05 |
| 0.023867 | 0.015282 | 1.96E-04 | 0.018824 | 0.039047 | 0        | 0.010294 | 0.206445 | 0.038285 | 0.052392 | 0.013315 | 0.038257 | 0.009378 | 0.015349 | 0.004614 |
| 0.004353 | 0.005959 | 0.002644 | 0.011106 | 0.013199 | 8.42E-04 | 0.014179 | 0        | 0.012012 | 3.00E-05 | 0        | 0.064095 | 0.033634 | 0.001285 | 0.002333 |
| 0.008594 | 0.028696 | 0.008096 | 0.045002 | 0.025115 | 0.001771 | 0.014359 | 0.012858 | 0.015942 | 0.014103 | 0.006554 | 0.015845 | 0.019196 | 0.026331 | 0.077829 |
| 0.012508 | 0.045132 | 2.65E-04 | 0.056202 | 0.007264 | 4.70E-05 | 0.001039 | 0.02835  | 4.45E-04 | 0.006925 | 0.151384 | 0.001882 | 0.0043   | 0.007379 | 0.006251 |
| 0.010541 | 0.046654 | 0.003497 | 0.014249 | 0.011323 | 1.12E-04 | 0.022182 | 0.015529 | 0.060914 | 0.009147 | 3.07E-04 | 0.008534 | 0.004243 | 0.009272 | 0.030481 |
| 3.33E-04 | 0        | 0.002997 | 0.010683 | 0.014252 | 2.49E-04 | 0.00178  | 0        | 1.10E-04 | 0.019539 | 0        | 0.009814 | 9.84E-04 | 0.001436 | 0.006329 |
| 5.85E-04 | 0.001616 | 0.009703 | 0.014747 | 0.00473  | 2.18E-04 | 0.002836 | 0.004326 | 0.004399 | 0.019033 | 0.011799 | 0.001329 | 4.85E-04 | 0.001318 | 0.00262  |
| 0.003815 | 0.009269 | 0.007893 | 0.014318 | 0.028584 | 0.001281 | 0.003483 | 0.008321 | 0.00372  | 0.010849 | 4.63E-04 | 0.020918 | 0.009301 | 0.005208 | 0.017067 |
| 0.001732 | 0.001468 | 0.03525  | 0.008913 | 1.56E-04 | 4.40E-05 | 0.003358 | 0        | 4.68E-04 | 4.50E-05 | 0.003239 | 7.51E-04 | 3.10E-05 | 0.001468 | 9.20E-05 |
| 0.001992 | 3.90E-05 | 0        | 9.75E-04 | 0.001165 | 0.128783 | 0.001934 | 0.017104 | 6.88E-04 | 0.003856 | 0.004348 | 1.51E-04 | 2.94E-04 | 0.002454 | 0.004562 |
| 0.006291 | 0.002784 | 0.030858 | 0        | 0.045151 | 0        | 0.067582 | 0.011977 | 0.021805 | 0.045282 | 0        | 0.007233 | 0.007024 | 0.018049 | 0.006448 |
| 0.001819 | 5.11E-04 | 0.005517 | 0.002788 | 0.004304 | 0.002049 | 0.003777 | 0.006919 | 0.005735 | 0.007467 | 0.006738 | 7.96E-04 | 0.00589  | 0.002838 | 0.001564 |
| 0        | 0        | 5.72E-04 | 4.30E-05 | 6.40E-05 | 1.59E-04 | 0        | 4.06E-04 | 0        | 1.03E-04 | 3.46E-04 | 0        | 0        | 0        | 0        |
| 0.003359 | 0.001005 | 0.004574 | 0.001044 | 0.04199  | 0.001037 | 0.012929 | 2.92E-04 | 8.40E-04 | 2.49E-04 | 3.48E-04 | 0.002782 | 0.049197 | 0.010548 | 0.003213 |
| 0.001391 | 0.001519 | 0.007702 | 0.006179 | 0.008818 | 0.001118 | 0.002438 | 5.01E-04 | 0.007299 | 0.002733 | 2.10E-05 | 0.014493 | 0.001506 | 0.001934 | 8.97E-04 |
| 0        | 0        | 8.60E-05 | 0        | 3.04E-04 | 0.067686 | 0.021683 | 5.34E-04 | 0.001357 | 0        | 0.09661  | 0        | 1.10E-04 | 0        | 3.60E-05 |
| 0        | 3.20E-05 | 0        | 0        | 0        | 0        | 8.90E-05 | 1.61E-04 | 0        | 4.19E-04 | 0        | 1.18E-04 | 5.70E-05 | 3.40E-05 | 0        |
| 0        | 7.00E-05 | 5.86E-04 | 8.00E-05 | 2.29E-04 | 6.72E-04 | 2.20E-05 | 1.80E-05 | 2.80E-05 | 1.41E-04 | 1.82E-04 | 1.78E-04 | 0        | 0.003001 | 3.30E-05 |
| 2.80E-05 | 3.50E-05 | 8.70E-05 | 0        | 0        | 0        | 1.90E-05 | 3.22E-04 | 0        | 0        | 4.00E-05 | 0        | 0        | 0        | 2.70E-05 |
| 0.012722 | 1.20E-04 | 4.20E-05 | 0        | 6.50E-05 | 8.90E-05 | 0.010982 | 3.34E-04 | 0.030975 | 0.001747 | 0        | 0        | 0.08022  | 0.006809 | 0        |
| 9.60E-04 | 0        | 0        | 0        | 0        | 0        | 0        | 1.11E-04 | 0        | 0        | 0        | 0        | 0.010202 | 0        | 0        |
| 0.001237 | 2.50E-04 | 0.005691 | 0.0027   | 0.008877 | 2.67E-04 | 0.002393 | 8.30E-05 | 0.00215  | 0.004141 | 0        | 0.021346 | 0.007203 | 0.001444 | 7.90E-04 |
| 0.001499 | 0.001321 | 9.00E-05 | 0.002853 | 0.005789 | 0        | 0.002675 | 0.005232 | 0.001783 | 0.006072 | 4.80E-05 | 0.004613 | 0.009852 | 0.001865 | 0.001622 |
| 6.26E-04 | 0.002    | 4.90E-05 | 0.003713 | 0.014952 | 0        | 5.58E-04 | 0.003541 | 4.65E-04 | 0.005989 | 0        | 0.010491 | 0.001491 | 0.003459 | 0.003044 |
| 0        | 7.10E-05 | 0        | 4.90E-05 | 2.18E-04 | 0.08295  | 4.52E-04 | 0.002373 | 8.50E-05 | 7.25E-04 | 5.20E-05 | 0        | 0        | 0        | 3.64E-04 |
| 0.011872 | 0.004264 | 6.54E-04 | 0.001357 | 0.002475 | 0.001367 | 0.006359 | 0.001671 | 0.00361  | 0.002973 | 0.005287 | 6.27E-04 | 0.005036 | 0.009194 | 0.002568 |
| 5.90E-05 | 6.41E-04 | 1.06E-04 | 0        | 0.001032 | 0        | 1.85E-04 | 0        | 1.20E-04 | 0.001198 | 0        | 1.62E-04 | 0.007028 | 5.14E-04 | 9.66E-04 |
| 4.83E-04 | 0        | 4.60E-05 | 0        | 0.00526  | 0        | 0.003309 | 0        | 0.002176 | 0        | 0        | 0.107542 | 0.010411 | 0.002922 | 0.004746 |
| 5.89E-04 | 0        | 0        | 0        | 2.23E-04 | 0        | 0        | 0        | 0        | 1.06E-04 | 0        | 0        | 0        | 7.20E-05 | 6.00E-05 |
| 0        | 0        | 0        | 0        | 0        | 0        | 0        | 0        | 0        | 0        | 0        | 0        | 0        | 0        | 0        |
| 1.56E-04 | 3.00E-05 | 0.017394 | 4.20E-05 | 9.18E-04 | 4.33E-04 | 7.50E-05 | 2.60E-04 | 7.06E-04 | 0.001424 | 5.10E-05 | 0.001826 | 5.20E-05 | 0        | 3.50E-05 |
| 0        | 0        | 0        | 0        | 0        | 0        | 0        | 0        | 0        | 0        | 0        | 0        | 0        | 0        | 0        |
| 0.001378 | 0.002693 | 0.007521 | 0.001441 | 0.003651 | 5.70E-05 | 0.001749 | 0.002726 | 0.002708 | 0.002254 | 0.002262 | 0.002577 | 0.002945 | 0.003828 | 0.007944 |
| 0        | 0        | 7.13E-04 | 4.40E-05 | 2.48E-04 | 0        | 2.61E-04 | 0        | 1.85E-04 | 0        | 2.60E-05 | 0.032658 | 2.53E-04 | 1.05E-04 | 1.38E-04 |
| 0.001726 | 0        | 0        | 0.001179 | 0.002508 | 0        | 0.001523 | 0        | 0.001269 | 0        | 0        | 0.007052 | 0        | 0        | 8.52E-04 |
| 8.23E-04 | 0        | 0        | 0.009133 | 0.003532 | 0        | 0        | 0        | 0.00971  | 0        | 0        | 0.005088 | 0        | 0.001265 | 0        |
| 0.001351 | 3.99E-04 | 0.002027 | 0.001738 | 7.20E-04 | 2.77E-04 | 8.00E-06 | 1.16E-04 | 0        | 7.65E-04 | 0.01016  | 5.51E-04 | 1.47E-04 | 2.66E-04 | 6.50E-05 |
| 0        | 0        | 0        | 0        | 0        | 0        | 0        | 0        | 0        | 0        | 0        | 0        | 0        | 0.010692 | 0        |
| 8.60E-05 | 6.60E-05 | 0        | 0        | 0        | 0.016014 | 4.40E-05 | 9.32E-04 | 9.45E-04 | 4.00E-05 | 0.006751 | 0        | 0        | 0        | 0        |
| 2.76E-04 | 9.40E-05 | 5.20E-05 | 1.79E-04 | 0.00135  | 0        | 2.65E-04 | 0        | 6.43E-04 | 0        | 0        | 0.001177 | 7.69E-04 | 0.007824 | 3.14E-04 |
| 0        | 0        | 2.51E-04 | 0        | 0        | 0        | 0        | 0        | 0        | 0        | 0        | 0        | 0        | 0        | 0        |
| 0.001928 | 0        | 0        | 0        | 0        | 0        | 1.40E-05 | 0        | 0.006218 | 0        | 0        | 0.003077 | 5.30E-05 | 1.23E-04 | 0        |

|          |          |          |          |          |          |          |          |          |          |          |          |          |          |          |
|----------|----------|----------|----------|----------|----------|----------|----------|----------|----------|----------|----------|----------|----------|----------|
| 0        | 0        | 0        | 0        | 0        | 0        | 0        | 3.10E-05 | 0        | 0        | 0        | 0        | 0        | 0        | 0        |
| 0        | 0        | 0        | 0        | 0        | 0        | 0        | 0        | 0        | 0        | 0        | 0        | 0        | 0        | 0        |
| 0        | 0        | 0        | 0        | 0        | 0        | 0        | 0        | 0        | 0        | 0        | 0        | 0        | 0        | 0        |
| 1.35E-04 | 0        | 1.37E-04 | 4.19E-04 | 1.42E-04 | 0        | 5.47E-04 | 0        | 1.07E-04 | 0        | 0        | 0.003339 | 6.06E-04 | 4.11E-04 | 3.68E-04 |
| 1.25E-04 | 1.71E-04 | 0        | 8.48E-04 | 0.002889 | 0        | 5.60E-04 | 0        | 9.55E-04 | 0        | 0        | 0.011565 | 0.001793 | 2.66E-04 | 0.002065 |
| 0        | 1.08E-04 | 0        | 5.20E-05 | 0        | 0        | 0        | 0        | 0        | 0        | 0        | 0        | 0        | 0        | 0        |
| 0        | 0.001533 | 0        | 3.88E-04 | 0        | 0        | 0.001343 | 0.005021 | 0        | 3.72E-04 | 0        | 0        | 0        | 1.18E-04 | 0.00107  |
| 2.24E-04 | 4.71E-04 | 2.70E-04 | 3.97E-04 | 6.26E-04 | 0        | 2.48E-04 | 0        | 2.60E-05 | 0        | 0        | 0.002226 | 0        | 1.18E-04 | 2.21E-04 |
| 2.27E-04 | 2.90E-05 | 3.65E-04 | 2.25E-04 | 0.001033 | 0        | 6.70E-05 | 0        | 5.10E-05 | 0        | 0        | 9.33E-04 | 2.96E-04 | 5.53E-04 | 5.41E-04 |
| 0        | 0        | 0        | 0        | 0        | 4.70E-05 | 0        | 0        | 0        | 0        | 0        | 1.53E-04 | 0        | 0.001956 | 0        |
| 2.80E-05 | 0        | 0        | 0        | 0        | 0        | 2.00E-05 | 1.60E-05 | 0        | 4.20E-05 | 0        | 1.80E-05 | 0        | 0        | 0        |
| 0        | 0        | 0        | 0        | 0        | 0.001674 | 0        | 0.002371 | 0.010068 | 3.60E-05 | 0.001473 | 0        | 0        | 0        | 0        |
| 0        | 0        | 0        | 0        | 0        | 0        | 0        | 0        | 0        | 0        | 0        | 0        | 0        | 0        | 0        |
| 0        | 0        | 0        | 0        | 0        | 0        | 0        | 0        | 0        | 0        | 0        | 0        | 0        | 0        | 0        |
| 8.00E-05 | 0        | 0        | 0        | 0        | 0        | 0        | 0        | 0        | 0        | 0        | 0        | 0        | 0        | 0        |
| 9.98E-04 | 0        | 6.70E-05 | 0        | 0        | 7.41E-04 | 6.00E-05 | 0        | 5.40E-05 | 0        | 0.001325 | 0        | 0        | 0        | 0        |
| 0        | 0        | 0        | 0        | 4.60E-05 | 0        | 0        | 5.10E-05 | 0        | 0        | 0        | 0        | 0        | 2.60E-05 | 2.40E-05 |
| 6.10E-05 | 0        | 0        | 9.88E-04 | 1.33E-04 | 0        | 0        | 0        | 0        | 0        | 0        | 0.011035 | 0        | 0        | 0        |
| 0        | 0        | 0        | 0        | 0        | 0        | 0        | 0        | 0        | 0        | 0        | 0        | 0        | 0        | 0        |
| 3.00E-05 | 3.40E-05 | 0        | 0        | 4.60E-05 | 0        | 3.30E-05 | 6.90E-05 | 2.40E-05 | 3.30E-05 | 1.90E-05 | 1.70E-05 | 1.24E-04 | 0        | 0        |
| 2.80E-05 | 0        | 0        | 0        | 0        | 0        | 1.70E-05 | 2.00E-05 | 0        | 8.70E-05 | 0        | 2.00E-05 | 0        | 0        | 0        |
| 0        | 0        | 1.69E-04 | 0        | 0        | 0        | 0        | 0        | 6.60E-05 | 0        | 0        | 0        | 0        | 0        | 0        |
| 5.90E-05 | 0        | 0        | 0        | 0        | 0        | 3.50E-05 | 0        | 0        | 0        | 0        | 1.21E-04 | 0        | 0        | 0        |
| 0        | 0        | 0        | 0        | 0        | 0        | 0        | 0        | 0        | 0        | 0        | 0        | 0        | 0        | 0        |
| 0.003332 | 0.001669 | 0.008345 | 0.004444 | 0.006997 | 4.36E-04 | 0.005582 | 0.006096 | 0.004529 | 0.010586 | 0.00172  | 0.018553 | 0.008182 | 0.00991  | 0.003415 |

| HC08     | HC60     | HC19     | HC62     | HC27     | HC47     | HC45     | HC52     | HC13     | HC10     | HC68     | HC43     | HC25     | HC12     | HC58     |
|----------|----------|----------|----------|----------|----------|----------|----------|----------|----------|----------|----------|----------|----------|----------|
| 0.157823 | 0.149078 | 0.135467 | 0.133597 | 0.114696 | 0.113318 | 0.098563 | 0.097215 | 0.086384 | 0.08337  | 0.081942 | 0.077014 | 0.073289 | 0.063356 | 0.060638 |
| 0.077887 | 0.065375 | 0.077276 | 0.057623 | 0.071135 | 0.012721 | 0.013687 | 0.221875 | 0.125534 | 0.385758 | 0.128978 | 0.226758 | 0.098662 | 0.058206 | 0.030241 |
| 0.021446 | 0.006929 | 0.012382 | 0.022013 | 0.030044 | 0.026447 | 0.003024 | 0.030051 | 0.023212 | 9.70E-05 | 0.003482 | 0.029951 | 0.01298  | 0.008535 | 0.007565 |
| 0.085992 | 0.049535 | 0.05041  | 0.054634 | 0.047367 | 0.027924 | 0.165789 | 0.079937 | 0.107094 | 0.005999 | 0.085939 | 0.053083 | 0.059211 | 0.037475 | 0.156142 |
| 6.19E-04 | 0.011132 | 0.244366 | 0.001416 | 0.002475 | 0        | 0        | 0.003023 | 4.60E-05 | 0        | 0.023347 | 4.10E-05 | 0.005079 | 0.002568 | 7.55E-04 |
| 1.51E-04 | 0.227194 | 0.104987 | 0.09267  | 0.008137 | 0        | 0.019181 | 6.60E-04 | 1.61E-04 | 2.20E-05 | 3.00E-05 | 0.341739 | 0.479599 | 0.473365 | 0.135651 |
| 0.124495 | 0.050709 | 0.030254 | 0.025532 | 0.050812 | 0.058173 | 0.023846 | 0.051501 | 0.244966 | 0        | 0.059451 | 0.043562 | 0.072068 | 0.056069 | 0.033966 |
| 0        | 0        | 9.70E-05 | 0.00381  | 4.00E-05 | 0        | 0        | 0        | 0        | 0        | 0        | 0.001969 | 0        | 0.001095 | 0        |
| 0.140514 | 0.123547 | 0.052852 | 0.216339 | 0.365211 | 0.187966 | 0.009981 | 0.007323 | 0.018056 | 8.65E-04 | 0.001157 | 0.011552 | 0.033265 | 0.020051 | 0.098842 |
| 0.005294 | 0.025515 | 1.18E-04 | 4.00E-05 | 0.045548 | 0        | 0.483683 | 0.200263 | 4.40E-05 | 0.025818 | 0.344976 | 0.005656 | 1.26E-04 | 4.42E-04 | 0.108765 |
| 0.035915 | 0.016611 | 0.040409 | 0.039352 | 0.025828 | 0.001714 | 0.014589 | 0.069263 | 0.118555 | 0        | 0.096644 | 0.017889 | 0.011268 | 0.030842 | 0.012859 |
| 0.001577 | 0.002484 | 1.77E-04 | 3.30E-05 | 1.25E-04 | 7.90E-04 | 2.34E-04 | 2.54E-04 | 2.33E-04 | 0.010225 | 2.99E-04 | 1.07E-04 | 3.55E-04 | 3.41E-04 | 0.001016 |
| 0        | 0        | 1.19E-04 | 0        | 1.60E-05 | 0        | 0        | 0        | 0        | 0.006033 | 0        | 0        | 6.30E-05 | 8.20E-05 | 0        |
| 0.003016 | 7.87E-04 | 0.004309 | 0.003695 | 0.014629 | 0.112797 | 0        | 0.005043 | 0.009902 | 0.245175 | 0.022308 | 0.002785 | 0        | 0.001657 | 9.50E-05 |
| 0.012153 | 0.008367 | 0.016152 | 0.011025 | 0.006444 | 0.001283 | 0.001692 | 0.049682 | 0.018792 | 0        | 0.010029 | 0.018356 | 0.02529  | 0.006463 | 0.043035 |
| 0.020837 | 0.002476 | 0.037963 | 0.060657 | 0.015309 | 0.147037 | 7.19E-04 | 0.027422 | 0.016121 | 0        | 6.03E-04 | 9.18E-04 | 0.017045 | 0.009947 | 0.085793 |
| 0.032782 | 0.009837 | 0.018517 | 0.015342 | 0.013994 | 0.008496 | 0.014573 | 0.016961 | 0.042077 | 0.001301 | 0.032237 | 0.029378 | 0.016102 | 0.034495 | 0.009555 |
| 0.011178 | 0.006141 | 0.007034 | 0.016844 | 0.005073 | 3.70E-05 | 0.012277 | 0.005166 | 0.00709  | 0        | 0.013035 | 0.010963 | 0.002996 | 0.003879 | 0.006204 |
| 0.019054 | 0.006508 | 0.006065 | 0.004984 | 0.007233 | 0.011341 | 0.002212 | 0.017749 | 0.017315 | 0.079382 | 0.010225 | 0.018894 | 0.007049 | 0.005423 | 0.004487 |
| 0.005025 | 0.006623 | 7.07E-04 | 0.009679 | 0.004858 | 0.01985  | 0.013602 | 0.003813 | 3.59E-04 | 8.40E-05 | 0.001572 | 4.40E-05 | 0.021096 | 0.002068 | 0.066022 |
| 0.005859 | 0.005641 | 0.004789 | 8.03E-04 | 3.35E-04 | 0.031312 | 0.001201 | 0.001223 | 0.017792 | 0        | 0.003129 | 0.009445 | 0.00504  | 0.006498 | 0.001373 |
| 0.06704  | 0.005233 | 0.008345 | 0.010357 | 0.003297 | 0.006251 | 0.029572 | 0.020061 | 0.010253 | 0        | 0.008377 | 0.008536 | 0.009822 | 0.011608 | 0.010321 |
| 0        | 4.50E-05 | 0.004257 | 0.001701 | 1.34E-04 | 1.06E-04 | 0.005128 | 0.005337 | 0        | 0        | 0.011923 | 0.004519 | 5.79E-04 | 0.001341 | 0        |
| 5.80E-05 | 0.010933 | 0.001456 | 0.002698 | 7.74E-04 | 0        | 0.001134 | 0.002563 | 0        | 0.02074  | 0.006708 | 3.29E-04 | 7.00E-05 | 0.00253  | 0.003785 |
| 0.029303 | 0.009468 | 0.016688 | 0.006896 | 0.002611 | 0.016024 | 0        | 0.021536 | 0.039875 | 0        | 0.00253  | 0.010418 | 0.001268 | 0.014491 | 0.012246 |
| 5.60E-05 | 0.003827 | 0.002365 | 0.006795 | 0.00399  | 0.004601 | 0.002707 | 0.011501 | 0.006569 | 0.017985 | 0.008381 | 0.002452 | 3.76E-04 | 3.24E-04 | 0.002788 |
| 0        | 0        | 0        | 0        | 0        | 0        | 0.004842 | 5.34E-04 | 0        | 0        | 2.05E-04 | 0        | 0        | 0        | 5.45E-04 |
| 0.042583 | 0.039399 | 0.026824 | 0.0267   | 0.012405 | 0.002681 | 0.001292 | 9.05E-04 | 0.002526 | 1.99E-04 | 0.001865 | 0.00368  | 0.003046 | 0.001411 | 0.003344 |
| 0.005806 | 0.011721 | 0.016167 | 0.020993 | 0.005989 | 0.006914 | 7.86E-04 | 0.004929 | 9.64E-04 | 0.021809 | 4.57E-04 | 0.006262 | 0.007523 | 0.003622 | 0.019788 |
| 0        | 0        | 0.007941 | 0        | 2.52E-04 | 3.00E-05 | 0        | 0.00107  | 4.29E-04 | 4.20E-05 | 0        | 5.18E-04 | 6.70E-05 | 0        | 0        |
| 3.90E-05 | 3.50E-05 | 0        | 2.10E-05 | 8.70E-05 | 3.29E-04 | 1.58E-04 | 1.77E-04 | 3.90E-05 | 0        | 1.53E-04 | 3.80E-05 | 0        | 0        | 5.60E-05 |
| 1.52E-04 | 0.01036  | 5.80E-05 | 6.22E-04 | 0.003044 | 0.001445 | 0        | 1.23E-04 | 1.71E-04 | 0.035129 | 8.00E-05 | 4.00E-05 | 0        | 0        | 0.002583 |
| 5.00E-05 | 0        | 0        | 0        | 4.20E-05 | 0        | 0        | 3.30E-05 | 0        | 1.79E-04 | 0        | 0        | 0        | 0        | 5.10E-05 |
| 0        | 0.006336 | 0.031676 | 0        | 0.024097 | 0        | 0        | 0.0119   | 0.021992 | 0        | 4.48E-04 | 0.002196 | 1.09E-04 | 0        | 1.56E-04 |
| 0        | 0        | 0        | 0.07062  | 0.035475 | 0        | 0        | 0        | 0        | 0        | 0        | 0        | 0        | 0        | 0        |
| 0.004851 | 0.004716 | 0.002457 | 0.004227 | 0.003652 | 0.009195 | 0.003387 | 0.002329 | 0.003691 | 0        | 0.00161  | 0.004613 | 0.002472 | 0.004887 | 0.008271 |
| 0.003439 | 0.006326 | 0.001403 | 0.007673 | 0.003675 | 0.007197 | 0.006608 | 5.69E-04 | 0.011609 | 1.35E-04 | 0.006242 | 8.53E-04 | 0.004562 | 0.001587 | 0.009032 |
| 0.009735 | 6.89E-04 | 8.90E-04 | 1.07E-04 | 5.27E-04 | 0.004987 | 4.02E-04 | 0.001863 | 0.007332 | 9.70E-05 | 0.002251 | 0.00154  | 0.002704 | 0.00168  | 0.001821 |
| 1.45E-04 | 1.74E-04 | 1.19E-04 | 0        | 2.40E-05 | 0        | 0        | 3.50E-05 | 1.42E-04 | 9.31E-04 | 0.003006 | 3.44E-04 | 0        | 9.40E-05 | 2.35E-04 |
| 0.001734 | 0.001096 | 0.00474  | 0.001003 | 0.001306 | 0.003084 | 0.003473 | 0.001134 | 0.004604 | 3.47E-04 | 0.004539 | 0.001329 | 9.72E-04 | 0.001208 | 0.001203 |
| 0.00332  | 0.00373  | 8.80E-05 | 0.002706 | 3.34E-04 | 2.07E-04 | 1.44E-04 | 0.001164 | 0.005925 | 0.004833 | 0        | 0        | 8.03E-04 | 2.80E-04 | 8.69E-04 |
| 0.007592 | 0.010459 | 0.001657 | 0.00679  | 0.008522 | 0.020912 | 0        | 0        | 0.002191 | 0        | 1.01E-04 | 0.005192 | 7.64E-04 | 0.002775 | 0.012585 |
| 0        | 7.50E-05 | 0        | 2.59E-04 | 0        | 0.04357  | 3.60E-05 | 0        | 0        | 0.032519 | 1.87E-04 | 4.19E-04 | 0        | 4.90E-05 | 4.80E-05 |
| 0        | 0        | 0        | 0        | 0        | 0        | 0        | 0        | 0        | 0        | 0        | 0        | 0        | 0        | 0        |
| 1.56E-04 | 6.82E-04 | 1.07E-04 | 5.71E-04 | 4.50E-05 | 6.15E-04 | 4.20E-05 | 4.43E-04 | 2.27E-04 | 5.28E-04 | 0        | 4.71E-04 | 0        | 9.80E-05 | 9.42E-04 |
| 0        | 0        | 0        | 0        | 0        | 0        | 0        | 0        | 0        | 0        | 0        | 0        | 0        | 0        | 0        |
| 0.002497 | 0.001393 | 0.001447 | 0.006169 | 0.003909 | 0.002778 | 7.08E-04 | 0.002862 | 0.004436 | 8.10E-04 | 0.004068 | 0.002825 | 0.002761 | 0.001622 | 0.002364 |
| 5.41E-04 | 0.009302 | 1.56E-04 | 0.00233  | 0.013976 | 0.010442 | 0        | 1.23E-04 | 0.00289  | 0        | 2.77E-04 | 0        | 1.63E-04 | 1.61E-04 | 0.010829 |
| 0.004802 | 4.15E-04 | 0.005219 | 0.010046 | 0.007608 | 0.039798 | 0        | 1.20E-05 | 0.00212  | 0        | 7.40E-05 | 0        | 0.001683 | 0.003389 | 1.42E-04 |
| 0.005082 | 8.83E-04 | 0        | 0        | 0.001437 | 0        | 0.003825 | 0        | 0        | 4.27E-04 | 3.60E-05 | 0        | 0.002344 | 0        | 0.00351  |
| 0.004516 | 3.90E-05 | 5.50E-05 | 3.86E-04 | 9.17E-04 | 0        | 0.003625 | 0.002875 | 0.001118 | 0        | 0.002759 | 0        | 0        | 0        | 0        |
| 0.02974  | 0.012816 | 0        | 0        | 0.003111 | 0        | 0        | 0.001289 | 0        | 0        | 0        | 0        | 0        | 0        | 0        |
| 0        | 0        | 0.003239 | 3.10E-05 | 1.60E-05 | 0        | 0        | 0        | 0        | 0        | 1.13E-04 | 3.70E-05 | 0        | 4.70E-05 | 5.74E-04 |
| 0.00114  | 0.002827 | 0.002186 | 0.005782 | 0.001279 | 0.016668 | 5.41E-04 | 2.64E-04 | 4.90E-04 | 0        | 0        | 0.012489 | 5.85E-04 | 0.00204  | 0.001187 |
| 0        | 0        | 0        | 0        | 0        | 0        | 0        | 0        | 0        | 0        | 0        | 0        | 0        | 0        | 0        |
| 5.20E-05 | 0.006736 | 0        | 0.008566 | 0.010105 | 0.017997 | 0        | 0.005856 | 3.42E-04 | 1.53E-04 | 0        | 0        | 1.10E-04 | 4.94E-04 | 0.001207 |

|          |          |          |          |          |          |          |          |          |          |          |          |          |          |          |          |
|----------|----------|----------|----------|----------|----------|----------|----------|----------|----------|----------|----------|----------|----------|----------|----------|
|          | 0        | 3.60E-05 | 0        | 0        | 0        | 0        | 0        | 0        | 0        | 0        | 0        | 0        | 0        | 0        | 0        |
|          | 0        | 0        | 0        | 0        | 0        | 0        | 0.001932 | 0        | 0        | 0        | 0        | 0.008527 | 0.005559 | 0.002769 |          |
|          | 0        | 0.001239 | 0        | 0        | 0        | 0.002688 | 0.036436 | 1.60E-05 | 0        | 0        | 0        | 0        | 0        | 0        | 0        |
| 0.002056 | 0.00277  | 0.00243  | 0.001433 | 0.001257 | 0.002687 | 0        | 6.32E-04 | 2.70E-04 | 0        | 0        | 1.55E-04 | 0.001051 | 4.43E-04 | 8.16E-04 |          |
| 2.99E-04 | 0.0023   | 7.13E-04 | 0.001823 | 7.24E-04 | 0.001488 | 0.002522 | 8.48E-04 | 0.004081 | 0        | 2.07E-04 | 1.61E-04 | 4.85E-04 | 1.76E-04 | 0.004626 |          |
|          | 0        | 3.30E-05 | 0        | 0        | 0        | 5.90E-05 | 0        | 0        | 0        | 0        | 2.90E-05 | 5.50E-05 | 0.06675  | 0        |          |
| 2.51E-04 | 1.32E-04 | 0        | 3.40E-05 | 0        | 0        | 0        | 6.30E-04 | 0        | 5.57E-04 | 9.04E-04 | 0.001409 | 0        | 1.01E-04 | 0        |          |
| 0.002328 | 0.003009 | 0.002005 | 0.001541 | 0.001345 | 8.47E-04 | 1.31E-04 | 1.50E-05 | 3.97E-04 | 0        | 3.40E-05 | 9.49E-04 | 0.0011   | 0.001163 | 4.96E-04 |          |
| 4.81E-04 | 5.56E-04 | 6.48E-04 | 0.001056 | 7.40E-04 | 0.002972 | 6.00E-05 | 3.40E-05 | 1.54E-04 | 1.36E-04 | 3.50E-05 | 0        | 2.37E-04 | 3.38E-04 | 0.003248 |          |
|          | 0        | 0        | 0        | 0        | 0        | 0        | 0        | 0        | 0        | 0        | 0.017861 | 0        | 0.019883 | 0        |          |
|          | 0        | 0        | 0        | 0        | 0        | 0        | 0        | 0        | 1.80E-05 | 0        | 0        | 0        | 0        | 0        |          |
|          | 0        | 0        | 1.22E-04 | 0        | 0        | 0        | 0        | 0        | 3.60E-05 | 0.016239 | 0        | 3.91E-04 | 1.01E-04 | 0        | 1.54E-04 |
|          | 0        | 0.039062 | 0        | 0        | 0        | 0        | 0        | 0        | 0        | 0        | 0        | 0        | 0        | 0        |          |
|          | 0        | 0        | 0        | 0        | 0        | 0        | 0        | 0        | 0        | 0        | 0.008151 | 0        | 0.007568 | 0        |          |
|          | 0        | 1.37E-04 | 0        | 0        | 0        | 0        | 0        | 0        | 0        | 0        | 0        | 0        | 0        | 0        |          |
|          | 0        | 0        | 0.001056 | 0        | 0        | 0        | 0        | 0        | 0        | 6.62E-04 | 0        | 0        | 0        | 0        |          |
|          | 0        | 0        | 0        | 0        | 0        | 0        | 0        | 0        | 0        | 0        | 0        | 0        | 0        | 5.10E-05 |          |
|          | 0        | 0        | 0        | 0        | 0        | 0        | 0        | 0        | 0        | 0        | 0        | 9.17E-04 | 5.03E-04 | 0        |          |
|          | 0        | 0        | 0        | 0        | 0        | 0        | 0        | 0        | 0        | 0        | 0        | 0        | 0        | 0        |          |
| 5.60E-05 | 0        | 0        | 0        | 1.20E-05 | 0        | 3.80E-05 | 0        | 0        | 0        | 1.52E-04 | 0        | 0        | 0        | 0        |          |
|          | 0        | 0        | 0        | 0        | 1.80E-05 | 0        | 0        | 0        | 0        | 3.70E-05 | 0        | 0        | 0        | 0        |          |
|          | 0        | 0        | 0        | 0        | 1.70E-05 | 1.58E-04 | 0        | 0        | 0        | 0        | 0        | 0        | 0        | 4.50E-05 |          |
|          | 0        | 0        | 0        | 0        | 4.20E-05 | 9.58E-04 | 0        | 0        | 0        | 0        | 0        | 0        | 0        | 0        |          |
|          | 0        | 0        | 0        | 0        | 0        | 0        | 0        | 0        | 0        | 0        | 0        | 0        | 0.012642 | 0        |          |
| 0.008483 | 0.016522 | 0.009036 | 0.019976 | 0.013896 | 0.011165 | 0.013491 | 0.005982 | 0.011394 | 0.002058 | 0.012196 | 0.00169  | 0.004161 | 0.006279 | 0.014309 |          |

| HC44     | HC22     | HC61     | HC23     | HC50     | HC40     | HC35     | HC32     | HC59     | HC42     |
|----------|----------|----------|----------|----------|----------|----------|----------|----------|----------|
| 0.057204 | 0.044406 | 0.038516 | 0.030468 | 0.027097 | 0.020953 | 0.02009  | 0.019934 | 0.017812 | 0.001876 |
| 0.369295 | 0.066474 | 0.060181 | 0.110501 | 0.130276 | 0.362303 | 0.182414 | 0.092576 | 0.073034 | 0.00652  |
| 0.026729 | 0.011019 | 0.005249 | 0.014714 | 0.040337 | 0.006316 | 0.007407 | 0.011787 | 0.015191 | 0.001123 |
| 0.082162 | 0.089517 | 0.076858 | 0.046375 | 0.091985 | 0.018834 | 0.033905 | 0.023    | 0.021478 | 0.005252 |
| 1.68E-04 | 0.332961 | 6.45E-04 | 0.002195 | 9.69E-04 | 2.69E-04 | 0        | 0        | 8.48E-04 | 1.54E-04 |
| 0        | 6.45E-04 | 0.279987 | 0.535504 | 0.094533 | 0.439739 | 0.240076 | 0.681331 | 0.511677 | 0.830509 |
| 0.031881 | 0.07846  | 0.030869 | 0.044778 | 0.08303  | 0.03017  | 0.074092 | 0.022437 | 0.053214 | 0.00319  |
| 3.60E-05 | 0        | 0        | 0        | 2.71E-04 | 2.65E-04 | 0        | 9.10E-05 | 0        | 0        |
| 0.012308 | 0.002373 | 0.216861 | 0.014486 | 0.261955 | 0.027065 | 0.011431 | 0.003205 | 0.039819 | 3.10E-04 |
| 0        | 5.10E-05 | 0.013282 | 0.00894  | 0.021126 | 0        | 7.88E-04 | 1.48E-04 | 1.19E-04 | 0.114668 |
| 0.058164 | 0.045048 | 0.062379 | 0.020824 | 0.009132 | 0.004774 | 0.020086 | 0.017011 | 0.015276 | 0.00453  |
| 6.08E-04 | 3.20E-04 | 1.26E-04 | 2.03E-04 | 7.60E-05 | 2.49E-04 | 0.012846 | 0.003594 | 0.004872 | 2.69E-04 |
| 0        | 0.007114 | 0        | 4.20E-05 | 9.50E-05 | 0        | 0        | 0        | 0        | 0        |
| 0.045582 | 1.08E-04 | 5.50E-05 | 0        | 2.71E-04 | 9.12E-04 | 9.26E-04 | 0.001831 | 0.036529 | 3.78E-04 |
| 0.008779 | 0.051365 | 0.003234 | 0.006561 | 0.008215 | 0.005421 | 0.016306 | 0.012957 | 0.012884 | 4.59E-04 |
| 0.001112 | 7.17E-04 | 0.011219 | 6.32E-04 | 0.014836 | 0.001855 | 0.004192 | 4.50E-04 | 0.00372  | 0        |
| 0.023977 | 0.010435 | 0.01544  | 0.015534 | 0.022311 | 0.01165  | 0.025252 | 0.019394 | 0.01709  | 0.001043 |
| 0.078565 | 0.050741 | 0.015235 | 0.006975 | 0.001033 | 0.00722  | 0.001585 | 0.022794 | 0.00308  | 0.00372  |
| 0.030215 | 0.001404 | 0.014277 | 0.029404 | 0.020701 | 0.007837 | 0.026543 | 0.00613  | 0.006062 | 6.40E-04 |
| 0.001032 | 0        | 0.016275 | 1.94E-04 | 0.005451 | 0        | 0.030727 | 0        | 2.02E-04 | 1.29E-04 |
| 0.008514 | 6.64E-04 | 9.33E-04 | 5.24E-04 | 0.001711 | 0.002879 | 0.012068 | 0.00357  | 0.012382 | 1.56E-04 |
| 0.012884 | 0.045077 | 0.004184 | 0.006992 | 0.009235 | 0.005649 | 0.003902 | 0.004849 | 0.005473 | 5.45E-04 |
| 0.01423  | 0        | 3.32E-04 | 7.96E-04 | 7.20E-04 | 0        | 0        | 2.12E-04 | 0.002115 | 0        |
| 0.09771  | 0.020784 | 6.00E-05 | 0.001565 | 0.001808 | 0.001736 | 0.108546 | 8.81E-04 | 4.15E-04 | 2.62E-04 |
| 0.009812 | 0.002891 | 0.006707 | 3.64E-04 | 0.012497 | 0.003497 | 0.003361 | 0.004126 | 0.021991 | 0        |
| 3.40E-04 | 0.011212 | 4.32E-04 | 0.001493 | 0.005453 | 0.001023 | 0.044767 | 0.002581 | 0.016363 | 0.001994 |
| 0        | 0        | 0        | 4.00E-05 | 0        | 0        | 5.90E-05 | 0        | 0        | 0        |
| 4.67E-04 | 0.003126 | 0.023713 | 0.001707 | 0.005434 | 0.009541 | 0.00647  | 9.02E-04 | 0.01526  | 1.91E-04 |
| 4.88E-04 | 0        | 0.006556 | 0.001636 | 0.004382 | 6.26E-04 | 0.001478 | 3.63E-04 | 0.004601 | 8.00E-05 |
| 0        | 0        | 0        | 7.14E-04 | 0        | 0        | 0.062247 | 0.011331 | 0        | 0.004858 |
| 2.04E-04 | 7.90E-05 | 0        | 1.17E-04 | 0        | 0        | 0        | 1.39E-04 | 8.40E-05 | 2.60E-05 |
| 0        | 1.85E-04 | 0.002159 | 2.99E-04 | 7.86E-04 | 0        | 0        | 0.001264 | 0.001077 | 5.45E-04 |
| 6.50E-05 | 8.40E-05 | 0        | 0        | 0        | 0        | 2.96E-04 | 9.20E-05 | 0        | 0        |
| 2.20E-05 | 3.69E-04 | 0        | 0.011573 | 0.02108  | 0.016053 | 9.20E-05 | 0.004811 | 0.032013 | 0        |
| 0        | 0        | 0.021503 | 0        | 9.50E-05 | 0        | 5.20E-05 | 0        | 0        | 8.42E-04 |
| 0.00161  | 0.002773 | 0.004417 | 0.002638 | 0.004759 | 0.0015   | 0.00357  | 7.38E-04 | 0.001682 | 2.51E-04 |
| 0.00266  | 4.40E-05 | 0.005891 | 0.005944 | 0.009778 | 0.002134 | 0.009219 | 0.001614 | 0.006544 | 1.89E-04 |
| 0.002029 | 0.006807 | 6.25E-04 | 6.04E-04 | 3.45E-04 | 5.24E-04 | 0        | 0        | 0.003643 | 2.90E-05 |
| 0.001039 | 1.86E-04 | 0        | 0        | 2.47E-04 | 0        | 0.001106 | 0.002763 | 1.23E-04 | 6.60E-05 |
| 0.003271 | 0.010716 | 9.38E-04 | 0.001033 | 0.003093 | 0.001705 | 0.001653 | 4.04E-04 | 4.30E-04 | 1.74E-04 |
| 0        | 0        | 0.001518 | 9.45E-04 | 0        | 2.55E-04 | 0.001406 | 0.001235 | 0        | 0.008571 |
| 0        | 0        | 0.003503 | 0.001219 | 0.005408 | 2.41E-04 | 0        | 0        | 6.25E-04 | 0        |
| 0.002742 | 0        | 0.005057 | 0.005177 | 4.50E-04 | 2.46E-04 | 0.00184  | 7.49E-04 | 0        | 1.85E-04 |
| 0        | 0        | 0        | 0        | 0        | 0        | 0        | 0        | 0        | 0        |
| 0        | 1.04E-04 | 1.63E-04 | 1.57E-04 | 0        | 0        | 1.12E-04 | 0        | 0        | 0        |
| 0        | 0        | 0        | 0        | 0        | 0        | 0        | 0        | 0        | 0        |
| 0.00654  | 0.002404 | 0.003355 | 0.00186  | 0.021314 | 0.001672 | 0.005957 | 3.99E-04 | 0.001885 | 3.40E-04 |
| 0        | 1.17E-04 | 0.023034 | 0.002812 | 0.007673 | 1.20E-04 | 0.002322 | 0        | 5.56E-04 | 0        |
| 5.28E-04 | 0        | 0        | 0        | 0.001416 | 0.001397 | 0        | 9.20E-05 | 0.004493 | 0        |
| 0.001096 | 0        | 2.85E-04 | 0.00111  | 0.001049 | 2.57E-04 | 2.01E-04 | 0        | 2.69E-04 | 0        |
| 0.001511 | 0.00215  | 3.80E-05 | 0        | 1.72E-04 | 0        | 0        | 0        | 3.24E-04 | 0        |
| 0        | 0        | 0        | 0.002244 | 0        | 0        | 0.005244 | 0        | 0        | 0        |
| 0        | 0.092949 | 0        | 1.67E-04 | 0        | 0        | 0        | 0        | 0        | 0        |
| 0        | 0        | 0.001227 | 0.001466 | 0.002978 | 8.73E-04 | 9.00E-04 | 2.67E-04 | 5.49E-04 | 2.80E-05 |
| 0        | 0        | 9.70E-05 | 0        | 0        | 0        | 0        | 0        | 0        | 0        |
| 0        | 0        | 0.004824 | 0.009096 | 0.020722 | 6.32E-04 | 0.001437 | 0        | 0        | 0        |

|          |          |          |          |          |          |          |          |          |          |
|----------|----------|----------|----------|----------|----------|----------|----------|----------|----------|
| 0        | 3.40E-05 | 0        | 0        | 0        | 0        | 0        | 0        | 0        | 7.80E-05 |
| 0        | 0        | 0        | 0        | 0        | 0        | 0        | 5.30E-05 | 0        | 0        |
| 0        | 4.20E-05 | 0.008527 | 0.031074 | 8.90E-05 | 0        | 0        | 0        | 0.013616 | 0        |
| 3.00E-05 | 0        | 3.72E-04 | 7.58E-04 | 3.44E-04 | 0        | 0        | 0        | 3.10E-04 | 0        |
| 6.90E-05 | 3.56E-04 | 0.001402 | 9.21E-04 | 8.26E-04 | 4.92E-04 | 0.002988 | 5.60E-05 | 9.80E-05 | 3.50E-05 |
| 0        | 0        | 0        | 3.61E-04 | 0        | 0        | 0        | 0        | 0        | 0        |
| 6.60E-05 | 0        | 0        | 4.00E-05 | 0        | 1.24E-04 | 0.001372 | 0.013257 | 1.79E-04 | 1.31E-04 |
| 6.00E-05 | 0        | 2.81E-04 | 5.25E-04 | 8.00E-05 | 0        | 0        | 0        | 0.001198 | 0        |
| 1.63E-04 | 0        | 0.001324 | 4.26E-04 | 4.67E-04 | 2.66E-04 | 5.78E-04 | 0        | 1.23E-04 | 2.80E-05 |
| 0        | 0        | 0        | 0        | 3.23E-04 | 0        | 0        | 0        | 0.011331 | 0        |
| 0        | 0        | 0        | 0        | 0        | 0        | 0        | 4.60E-05 | 0        | 1.44E-04 |
| 0        | 3.40E-05 | 0        | 0.002106 | 0        | 0        | 1.00E-04 | 0.001667 | 0        | 0.00197  |
| 0        | 0        | 0        | 0        | 0        | 0        | 0        | 0        | 0        | 0        |
| 0        | 0        | 0        | 0        | 0        | 0        | 0        | 0        | 0        | 0        |
| 0        | 0        | 0        | 0        | 0        | 0        | 0        | 0        | 0        | 1.37E-04 |
| 3.60E-05 | 0        | 0        | 0        | 0        | 0        | 0        | 0        | 0        | 0        |
| 0        | 0        | 0        | 0        | 0        | 0        | 0        | 0        | 0        | 0        |
| 0        | 0        | 0        | 0        | 2.87E-04 | 0        | 0        | 0        | 4.00E-05 | 0        |
| 0        | 0        | 0        | 0        | 0        | 0        | 0        | 0        | 0        | 0        |
| 2.43E-04 | 0        | 3.20E-05 | 0        | 0        | 0        | 6.20E-05 | 0        | 0        | 0        |
| 4.20E-05 | 0        | 0        | 0        | 0        | 0        | 0        | 5.00E-05 | 0        | 0        |
| 0        | 0        | 0        | 0        | 0        | 0        | 0        | 0        | 0        | 0        |
| 0        | 0        | 6.00E-05 | 3.50E-05 | 2.68E-04 | 0        | 0        | 0        | 0        | 0        |
| 0        | 0        | 0        | 0        | 0        | 0        | 0        | 0        | 0        | 0        |
| 0.003712 | 0.004001 | 0.005763 | 0.011132 | 0.021011 | 7.26E-04 | 0.007929 | 0.002819 | 0.007301 | 0.003375 |

| Table S34. The abundance and composition at the genus and phylum level of each sample among CP (n=36), CPR (n=18), and HC (n=72) groups. |          |          |          |          |          |          |          |          |          |          |          |
|------------------------------------------------------------------------------------------------------------------------------------------|----------|----------|----------|----------|----------|----------|----------|----------|----------|----------|----------|
| ID                                                                                                                                       | CP24     | CP05     | CP06     | CP23     | CP08     | CP15     | CP04     | CP35     | CP09     | CP12     | CP14     |
| Firmicutes                                                                                                                               | 0.997829 | 0.992873 | 0.989415 | 0.983507 | 0.978695 | 0.976128 | 0.961634 | 0.950853 | 0.932169 | 0.908497 | 0.88891  |
| Bacteroidetes                                                                                                                            | 5.44E-04 | 0.004781 | 0.007433 | 1.04E-04 | 0.004243 | 1.78E-04 | 0.010855 | 0.038363 | 0.016957 | 0.077495 | 0.09165  |
| Proteobacteria                                                                                                                           | 4.15E-04 | 8.20E-04 | 6.70E-04 | 0.016231 | 0.012099 | 0.006101 | 0.008212 | 0.008047 | 0.013182 | 0.00906  | 6.93E-04 |
| Verrucomicrobia                                                                                                                          | 0        | 0        | 0        | 0        | 3.10E-05 | 4.50E-05 | 0.011336 | 4.30E-05 | 3.20E-05 | 0.00151  | 2.15E-04 |
| Actinobacteria                                                                                                                           | 8.91E-04 | 9.90E-04 | 0.002042 | 1.31E-04 | 0.004345 | 0.017548 | 0.007457 | 0.00203  | 0.037105 | 0.001551 | 0.016443 |
| Fusobacteria                                                                                                                             | 1.46E-04 | 0        | 0        | 0        | 0        | 0        | 1.20E-05 | 2.20E-05 | 0        | 7.51E-04 | 0.001016 |
| Bacteria_unclassified                                                                                                                    | 0        | 2.80E-05 | 1.47E-04 | 0        | 5.30E-05 | 0        | 4.24E-04 | 4.80E-05 | 4.70E-05 | 0.001071 | 7.18E-04 |
| Cyanobacteria                                                                                                                            | 1.75E-04 | 0        | 0        | 2.70E-05 | 1.80E-05 | 0        | 4.50E-05 | 0        | 0        | 0        | 0        |
| Tenericutes                                                                                                                              | 0        | 0        | 0        | 0        | 0        | 0        | 0        | 0        | 0        | 0        | 0        |
| Candidate_division_TM7                                                                                                                   | 0        | 5.08E-04 | 2.93E-04 | 0        | 5.16E-04 | 0        | 2.50E-05 | 4.26E-04 | 5.08E-04 | 0        | 3.55E-04 |
| Synergistetes                                                                                                                            | 0        | 0        | 0        | 0        | 0        | 0        | 0        | 1.68E-04 | 0        | 6.50E-05 | 0        |
| Lentisphaerae                                                                                                                            | 0        | 0        | 0        | 0        | 0        | 0        | 0        | 0        | 0        | 0        | 0        |

| CP18     | CP27     | CP30     | CP13     | CP20     | CP22     | CP33     | CP29     | CP28     | CP34     | CP10     | CP36     | CP02     |
|----------|----------|----------|----------|----------|----------|----------|----------|----------|----------|----------|----------|----------|
| 0.855679 | 0.816773 | 0.666519 | 0.660596 | 0.606162 | 0.555122 | 0.520917 | 0.502801 | 0.490382 | 0.443893 | 0.425654 | 0.408177 | 0.405121 |
| 0.131619 | 0.152363 | 0.004746 | 0.036495 | 0.354219 | 0.433062 | 0.372986 | 0.013577 | 0.008284 | 0.486438 | 0.261686 | 0.538992 | 9.40E-05 |
| 0.00941  | 0.012748 | 0.012664 | 0.301777 | 0.039038 | 0.009294 | 0.062168 | 0.014831 | 0.162201 | 0.065874 | 0.27932  | 0.049414 | 0.006692 |
| 2.80E-05 | 0.013109 | 8.90E-05 | 6.70E-05 | 0        | 0        | 0.030877 | 9.00E-05 | 2.40E-04 | 0        | 0        | 0        | 0        |
| 0.003066 | 0.001621 | 0.313434 | 9.48E-04 | 2.22E-04 | 0.00147  | 6.78E-04 | 0.456088 | 0.337184 | 0.001871 | 0.033109 | 0.002746 | 0.587975 |
| 8.20E-05 | 1.90E-05 | 3.37E-04 | 0        | 6.90E-05 | 6.97E-04 | 0.009975 | 6.28E-04 | 2.28E-04 | 8.31E-04 | 0        | 0        | 0        |
| 7.90E-05 | 5.88E-04 | 1.39E-04 | 7.60E-05 | 1.99E-04 | 2.34E-04 | 7.46E-04 | 0        | 0        | 9.80E-04 | 2.31E-04 | 3.58E-04 | 3.40E-05 |
| 3.70E-05 | 0        | 2.39E-04 | 0        | 0        | 0        | 0        | 4.47E-04 | 0.001481 | 2.10E-05 | 0        | 2.20E-05 | 3.00E-05 |
| 0        | 0        | 0        | 0        | 0        | 0        | 0        | 0        | 0        | 0        | 0        | 0        | 0        |
| 0        | 0.002779 | 0.001833 | 4.10E-05 | 9.10E-05 | 1.21E-04 | 4.64E-04 | 0.011538 | 0        | 9.20E-05 | 0        | 2.91E-04 | 5.40E-05 |
| 0        | 0        | 0        | 0        | 0        | 0        | 0.001189 | 0        | 0        | 0        | 0        | 0        | 0        |
| 0        | 0        | 0        | 0        | 0        | 0        | 0        | 0        | 0        | 0        | 0        | 0        | 0        |

| CP26     | CP19     | CP07     | CP32     | CP01     | CP25     | CP16     | CP03     | CP11     | CP17     | CP21     | CP31     | CPR15    |
|----------|----------|----------|----------|----------|----------|----------|----------|----------|----------|----------|----------|----------|
| 0.31209  | 0.299927 | 0.295702 | 0.232931 | 0.209967 | 0.160713 | 0.137203 | 0.135524 | 0.120813 | 0.085441 | 0.014363 | 0.006469 | 0.724581 |
| 0.682984 | 0.018852 | 0.182313 | 0.577536 | 0.057134 | 0.79557  | 0.061069 | 9.31E-04 | 0.001145 | 0.002325 | 0.003127 | 7.92E-04 | 0.208159 |
| 0.00352  | 0.448392 | 0.517393 | 0.125344 | 0.006764 | 0.011899 | 0.089405 | 0.856772 | 0.006182 | 0.005211 | 0.97917  | 0.992593 | 0.063737 |
| 8.00E-05 | 0.23081  | 3.90E-05 | 0        | 0.673565 | 0        | 0.709057 | 0.005649 | 0.870406 | 0.903709 | 0        | 0        | 4.69E-04 |
| 2.43E-04 | 0.001813 | 2.72E-04 | 0.004295 | 0.05254  | 0.001611 | 0.002237 | 2.56E-04 | 0.00142  | 0.00207  | 0.00276  | 1.46E-04 | 6.57E-04 |
| 0        | 6.70E-05 | 0.003799 | 0.059216 | 0        | 0.026589 | 0        | 1.08E-04 | 3.40E-05 | 0        | 0        | 0        | 2.21E-04 |
| 9.85E-04 | 0        | 1.40E-04 | 6.78E-04 | 3.00E-05 | 0.003591 | 0.001006 | 4.61E-04 | 0        | 0        | 0        | 0        | 0.001541 |
| 0        | 0        | 0        | 0        | 0        | 0        | 0        | 0        | 0        | 7.77E-04 | 0        | 0        | 0        |
| 0        | 0        | 0        | 0        | 0        | 0        | 0        | 0        | 0        | 0        | 0        | 0        | 0        |
| 9.80E-05 | 1.13E-04 | 3.42E-04 | 0        | 0        | 2.70E-05 | 2.30E-05 | 2.99E-04 | 0        | 4.67E-04 | 5.80E-04 | 0        | 6.35E-04 |
| 0        | 2.60E-05 | 0        | 0        | 0        | 0        | 0        | 0        | 0        | 0        | 0        | 0        | 0        |
| 0        | 0        | 0        | 0        | 0        | 0        | 0        | 0        | 0        | 0        | 0        | 0        | 0        |

| CPR18    | CPR04    | CPR12    | CPR05    | CPR02    | CPR09    | CPR14    | CPR07    | CPR11    | CPR13    | CPR10    | CPR01    | CPR16    |
|----------|----------|----------|----------|----------|----------|----------|----------|----------|----------|----------|----------|----------|
| 0.662992 | 0.555031 | 0.52435  | 0.519951 | 0.492907 | 0.278594 | 0.251316 | 0.242671 | 0.223503 | 0.177411 | 0.15932  | 0.121905 | 0.115971 |
| 0.077445 | 0.401697 | 0.44139  | 0.447861 | 0.088507 | 0.709163 | 0.688097 | 0.002364 | 0.775912 | 0.754606 | 0.820456 | 0.641264 | 0.742937 |
| 0.220198 | 0.025361 | 0.032397 | 0.031121 | 0.41109  | 0.008948 | 0.029255 | 0.013626 | 2.11E-04 | 0.066665 | 0.011493 | 0.012491 | 0.140377 |
| 0        | 6.40E-05 | 0        | 0        | 1.41E-04 | 5.40E-05 | 0.028665 | 0.304995 | 0        | 6.21E-04 | 0        | 0.222526 | 0        |
| 0.032489 | 0.012566 | 0.001625 | 1.17E-04 | 3.89E-04 | 1.90E-04 | 0.001527 | 0.009707 | 3.20E-04 | 2.04E-04 | 0.007772 | 7.62E-04 | 1.38E-04 |
| 0.005788 | 6.64E-04 | 5.20E-05 | 0        | 0.001511 | 0        | 2.01E-04 | 0.426565 | 0        | 0        | 3.64E-04 | 9.07E-04 | 0        |
| 9.73E-04 | 0.004426 | 1.24E-04 | 8.27E-04 | 0.00532  | 0.003051 | 9.10E-04 | 7.20E-05 | 0        | 4.03E-04 | 5.95E-04 | 6.50E-05 | 5.21E-04 |
| 5.00E-05 | 0        | 0        | 0        | 0        | 0        | 0        | 0        | 0        | 0        | 0        | 0        | 0        |
| 0        | 0        | 0        | 0        | 0        | 0        | 0        | 0        | 0        | 0        | 0        | 0        | 0        |
| 6.50E-05 | 1.91E-04 | 0        | 7.00E-05 | 1.35E-04 | 0        | 0        | 0        | 5.40E-05 | 9.00E-05 | 0        | 8.00E-05 | 5.60E-05 |
| 0        | 0        | 6.20E-05 | 5.30E-05 | 0        | 0        | 2.90E-05 | 0        | 0        | 0        | 0        | 0        | 0        |
| 0        | 0        | 0        | 0        | 0        | 0        | 0        | 0        | 0        | 0        | 0        | 0        | 0        |

| CPR08    | CPR03    | CPR17    | CPR06    | HC44     | HC13     | HC68     | HC52     | HC45     | HC50     | HC41     | HC27     | HC46     |
|----------|----------|----------|----------|----------|----------|----------|----------|----------|----------|----------|----------|----------|
| 0.107922 | 0.090256 | 0.081297 | 0.059448 | 0.874827 | 0.864705 | 0.850781 | 0.839369 | 0.824767 | 0.819493 | 0.816453 | 0.802124 | 0.762366 |
| 0.866292 | 0.865053 | 0.89685  | 0.753694 | 0.060518 | 0.106943 | 0.083176 | 0.134386 | 0.160182 | 0.147722 | 0.177665 | 0.160365 | 0.211321 |
| 0.015667 | 0.011941 | 0.019014 | 0.00449  | 0.014585 | 0.009672 | 0.037819 | 0.019217 | 0.005464 | 0.023598 | 0.003042 | 0.016436 | 0.020432 |
| 0        | 0.002309 | 0        | 4.00E-05 | 3.60E-05 | 0        | 0        | 0        | 0        | 2.71E-04 | 0        | 4.00E-05 | 0        |
| 8.70E-05 | 4.30E-05 | 5.37E-04 | 5.80E-05 | 0.04652  | 0.013981 | 0.023328 | 0.005337 | 9.89E-04 | 4.42E-04 | 2.72E-04 | 0.018526 | 0.003347 |
| 0.008485 | 0.030135 | 0        | 0.180934 | 0        | 0        | 2.05E-04 | 5.34E-04 | 0.00504  | 7.60E-05 | 0        | 0        | 4.06E-04 |
| 0.001547 | 8.50E-05 | 0.002274 | 0.001336 | 0.003271 | 0.004604 | 0.004539 | 0.001134 | 0.003473 | 0.003093 | 0.002568 | 0.001306 | 0.001671 |
| 0        | 0        | 0        | 0        | 0        | 0        | 0        | 0        | 4.70E-05 | 3.23E-04 | 0        | 2.00E-05 | 3.88E-04 |
| 0        | 0        | 0        | 0        | 0        | 0        | 0        | 0        | 0        | 0.004982 | 0        | 0.001053 | 0        |
| 0        | 1.78E-04 | 2.80E-05 | 0        | 2.43E-04 | 0        | 1.52E-04 | 0        | 3.80E-05 | 0        | 0        | 1.20E-05 | 6.90E-05 |
| 0        | 0        | 0        | 0        | 0        | 9.50E-05 | 0        | 2.30E-05 | 0        | 0        | 0        | 1.18E-04 | 0        |
| 0        | 0        | 0        | 0        | 0        | 0        | 0        | 0        | 0        | 0        | 0        | 0        | 0        |

| HC08     | HC11     | HC53     | HC06     | HC24     | HC09     | HC15     | HC72     | HC58     | HC54     | HC28     | HC63     | HC35     |
|----------|----------|----------|----------|----------|----------|----------|----------|----------|----------|----------|----------|----------|
| 0.75743  | 0.705085 | 0.699848 | 0.697759 | 0.695185 | 0.690926 | 0.686494 | 0.682277 | 0.68     | 0.668454 | 0.668301 | 0.662395 | 0.655707 |
| 0.230517 | 0.283643 | 0.240684 | 0.263554 | 0.293798 | 0.296443 | 0.199723 | 0.300767 | 0.310936 | 0.315022 | 0.310252 | 0.329831 | 0.272181 |
| 0.005806 | 0.00385  | 0.019947 | 0.030373 | 0.003858 | 0.010457 | 0.004187 | 0.010358 | 0.005219 | 0.008342 | 0.00575  | 0.002751 | 0.067128 |
| 0        | 0        | 0        | 6.24E-04 | 3.04E-04 | 4.30E-05 | 0        | 1.58E-04 | 0        | 4.08E-04 | 0        | 0        | 0        |
| 0.004406 | 0.003053 | 0.035887 | 0.001298 | 0.004166 | 7.31E-04 | 0.106487 | 0.003267 | 0.001797 | 0.002336 | 0.008227 | 0.003952 | 0.00321  |
| 0        | 0        | 0        | 0        | 6.40E-05 | 4.30E-05 | 1.03E-04 | 0        | 5.45E-04 | 0        | 0        | 0        | 5.90E-05 |
| 0.001734 | 0.004264 | 0.00361  | 0.006359 | 0.002475 | 0.001357 | 0.002973 | 6.27E-04 | 0.001203 | 0.005036 | 0.007436 | 8.66E-04 | 0.001653 |
| 0        | 7.10E-05 | 0        | 0        | 0        | 0        | 0        | 1.53E-04 | 0        | 0        | 0        | 0        | 0        |
| 5.10E-05 | 0        | 0        | 0        | 1.04E-04 | 0        | 0        | 0.001715 | 0        | 2.78E-04 | 0        | 0        | 0        |
| 5.60E-05 | 3.40E-05 | 2.40E-05 | 3.30E-05 | 4.60E-05 | 0        | 3.30E-05 | 1.70E-05 | 0        | 1.24E-04 | 3.40E-05 | 0        | 6.20E-05 |
| 0        | 0        | 0        | 0        | 0        | 0        | 0        | 6.61E-04 | 3.00E-04 | 0        | 0        | 2.05E-04 | 0        |
| 0        | 0        | 0        | 0        | 0        | 0        | 0        | 0        | 0        | 0        | 0        | 0        | 0        |

| HC67     | HC62     | HC61     | HC18     | HC64     | HC65     | HC10     | HC14     | HC29     | HC34     | HC36     | HC49     | HC69     |
|----------|----------|----------|----------|----------|----------|----------|----------|----------|----------|----------|----------|----------|
| 0.645495 | 0.64368  | 0.641625 | 0.641173 | 0.635829 | 0.627401 | 0.626005 | 0.62459  | 0.612846 | 0.609555 | 0.601254 | 0.599994 | 0.599387 |
| 0.32832  | 0.327335 | 0.347384 | 0.285263 | 0.334082 | 0.313399 | 0.106074 | 0.370677 | 0.37037  | 0.362781 | 0.319785 | 0.382099 | 0.385169 |
| 0.011559 | 0.016283 | 0.008675 | 0.042499 | 0.009113 | 0.032715 | 0.022202 | 0.003252 | 0.00282  | 0.011092 | 0.00348  | 0.005694 | 0.007138 |
| 8.21E-04 | 0.00381  | 0        | 0        | 0        | 0        | 0        | 0        | 0        | 0        | 0        | 0        | 0        |
| 0.007506 | 0.004513 | 0.001346 | 0.02976  | 0.013995 | 0.022357 | 0.245372 | 4.65E-04 | 0.00701  | 0.003423 | 0.07278  | 0.003228 | 0.001606 |
| 5.20E-05 | 0        | 0        | 5.72E-04 | 0        | 1.97E-04 | 0        | 4.10E-05 | 0        | 0.006443 | 0        | 0        | 0        |
| 0.005786 | 0.001003 | 9.38E-04 | 6.54E-04 | 0.006981 | 0.002693 | 3.47E-04 | 9.42E-04 | 0.006919 | 0.006706 | 0.002701 | 0.008985 | 0.004106 |
| 7.20E-05 | 0        | 0        | 0        | 0        | 0        | 0        | 3.30E-05 | 3.50E-05 | 0        | 0        | 0        | 0.002239 |
| 3.89E-04 | 0.003282 | 0        | 0        | 0        | 0        | 0        | 0        | 0        | 0        | 0        | 0        | 2.51E-04 |
| 0        | 0        | 3.20E-05 | 0        | 0        | 2.70E-05 | 0        | 0        | 0        | 0        | 0        | 0        | 0        |
| 0        | 9.40E-05 | 0        | 7.90E-05 | 0        | 0.001211 | 0        | 0        | 0        | 0        | 0        | 0        | 1.04E-04 |
| 0        | 0        | 0        | 0        | 0        | 0        | 0        | 0        | 0        | 0        | 0        | 0        | 0        |

| HC03     | HC57     | HC71     | HC55     | HC47     | HC17     | HC40     | HC48     | HC43     | HC22     | HC60     | HC39     | HC51     |
|----------|----------|----------|----------|----------|----------|----------|----------|----------|----------|----------|----------|----------|
| 0.594634 | 0.587209 | 0.553138 | 0.549681 | 0.532171 | 0.530532 | 0.530021 | 0.529334 | 0.529049 | 0.515309 | 0.513667 | 0.453768 | 0.452681 |
| 0.3544   | 0.402316 | 0.418247 | 0.428618 | 0.330141 | 0.436172 | 0.465817 | 0.196442 | 0.439561 | 0.045464 | 0.453697 | 0.524846 | 0.529741 |
| 0.013972 | 0.007724 | 0.023168 | 0.014594 | 0.01834  | 0.022295 | 0.00128  | 0.268503 | 0.007292 | 0.42824  | 0.0263   | 0.010863 | 0.009492 |
| 0        | 0        | 0        | 0        | 0        | 0        | 2.65E-04 | 0        | 0.001969 | 0        | 0        | 3.10E-05 | 0        |
| 0.033903 | 1.44E-04 | 9.59E-04 | 7.14E-04 | 0.116154 | 0.008747 | 9.12E-04 | 6.90E-05 | 0.002939 | 2.71E-04 | 0.002947 | 0.007011 | 0.003825 |
| 0        | 3.50E-05 | 0        | 0        | 0        | 1.70E-04 | 0        | 3.46E-04 | 0        | 0        | 0        | 0        | 0        |
| 0.002976 | 0.002535 | 0.003729 | 0.006393 | 0.003084 | 0.002084 | 0.001705 | 0.005287 | 0.001329 | 0.010716 | 0.001096 | 0.002903 | 0.002199 |
| 0        | 0        | 0        | 0        | 0        | 0        | 0        | 0        | 0.017861 | 0        | 0        | 0        | 0        |
| 0        | 0        | 4.68E-04 | 0        | 1.10E-04 | 0        | 0        | 0        | 0        | 0        | 0.001482 | 5.78E-04 | 0.002014 |
| 1.15E-04 | 3.70E-05 | 4.60E-05 | 0        | 0        | 0        | 0        | 1.90E-05 | 0        | 0        | 0        | 0        | 0        |
| 0        | 0        | 2.45E-04 | 0        | 0        | 0        | 0        | 0        | 0        | 0        | 0        | 0        | 4.80E-05 |
| 0        | 0        | 0        | 0        | 0        | 0        | 0        | 0        | 0        | 0        | 8.11E-04 | 0        | 0        |

| HC38     | HC19     | HC04     | HC25     | HC02     | HC30     | HC12     | HC01     | HC59     | HC16     | HC23     | HC56     | HC21     |
|----------|----------|----------|----------|----------|----------|----------|----------|----------|----------|----------|----------|----------|
| 0.443792 | 0.416334 | 0.398676 | 0.397619 | 0.395568 | 0.394137 | 0.392735 | 0.389358 | 0.386202 | 0.375598 | 0.370804 | 0.351259 | 0.346236 |
| 0.54206  | 0.30666  | 0.341783 | 0.593822 | 0.292206 | 0.565484 | 0.564318 | 0.590619 | 0.559826 | 0.585339 | 0.610451 | 0.627293 | 0.582587 |
| 0.002508 | 0.26596  | 0.254191 | 0.007174 | 0.299237 | 0.03309  | 0.005974 | 0.012813 | 0.003657 | 0.024661 | 0.017248 | 0.015382 | 0.014377 |
| 3.00E-05 | 9.70E-05 | 0        | 0        | 0        | 0.001898 | 0.001095 | 0        | 0        | 0        | 0        | 0.001832 | 0        |
| 4.60E-04 | 0.005632 | 0.001369 | 3.05E-04 | 0.001005 | 0.003194 | 0.002061 | 8.83E-04 | 0.038418 | 0.009817 | 3.10E-04 | 6.85E-04 | 0.047958 |
| 0        | 0        | 9.10E-05 | 0        | 0        | 0        | 0        | 0.003129 | 0        | 1.29E-04 | 4.00E-05 | 0.001006 | 0        |
| 0.009194 | 0.00474  | 0.003263 | 9.72E-04 | 0.011872 | 0.001394 | 0.001208 | 0.003162 | 4.30E-04 | 0.004456 | 0.001033 | 0.002279 | 0.008842 |
| 0.001956 | 0        | 0        | 0        | 0        | 0        | 0.019883 | 0        | 0.011331 | 0        | 0        | 0        | 0        |
| 0        | 5.77E-04 | 0        | 1.08E-04 | 0        | 0        | 0.01268  | 0        | 1.36E-04 | 0        | 3.10E-05 | 0        | 0        |
| 0        | 0        | 6.27E-04 | 0        | 3.00E-05 | 0        | 0        | 3.60E-05 | 0        | 0        | 0        | 3.20E-05 | 0        |
| 0        | 0        | 0        | 0        | 8.20E-05 | 8.03E-04 | 0        | 0        | 0        | 0        | 0        | 0        | 0        |
| 0        | 0        | 0        | 0        | 0        | 0        | 4.60E-05 | 0        | 0        | 0        | 8.30E-05 | 2.32E-04 | 0        |

| HC66     | HC07     | HC33     | HC31     | HC32     | HC37     | HC05     | HC26     | HC20     | HC42     | HC70     |
|----------|----------|----------|----------|----------|----------|----------|----------|----------|----------|----------|
| 0.345523 | 0.344776 | 0.342368 | 0.324681 | 0.266592 | 0.26164  | 0.251723 | 0.234066 | 0.189498 | 0.14922  | 0.144314 |
| 0.528122 | 0.623306 | 0.332617 | 0.651977 | 0.70249  | 0.724177 | 0.249858 | 0.719478 | 0.706609 | 0.83263  | 0.782005 |
| 0.037532 | 0.020986 | 0.185606 | 0.017763 | 0.02799  | 0.008575 | 0.496733 | 0.038346 | 0.083137 | 0.015756 | 0.042559 |
| 0.064035 | 0        | 2.20E-05 | 0        | 9.10E-05 | 6.55E-04 | 0        | 0        | 0.001704 | 0        | 0        |
| 0.023434 | 0.008465 | 0.127543 | 0.002243 | 0.002382 | 9.30E-05 | 1.13E-04 | 0.005376 | 0.004539 | 0.001382 | 7.56E-04 |
| 7.60E-05 | 4.40E-05 | 0        | 5.48E-04 | 0        | 2.50E-05 | 1.59E-04 | 3.90E-05 | 0.010272 | 8.01E-04 | 0.028295 |
| 0.001206 | 0.002423 | 0.011844 | 0.002788 | 4.04E-04 | 0.004835 | 0.001367 | 0.002695 | 0.004241 | 1.74E-04 | 0.002071 |
| 0        | 0        | 0        | 0        | 0        | 0        | 4.70E-05 | 0        | 0        | 0        | 0        |
| 0        | 0        | 0        | 0        | 5.10E-05 | 0        | 0        | 0        | 0        | 3.70E-05 | 0        |
| 7.20E-05 | 0        | 0        | 0        | 0        | 0        | 0        | 0        | 0        | 0        | 0        |
| 0        | 0        | 0        | 0        | 0        | 0        | 0        | 0        | 0        | 0        | 0        |
| 0        | 0        | 0        | 0        | 0        | 0        | 0        | 0        | 0        | 0        | 0        |

Table S35. The different degree of genus level (p value) among the CP (n=36), CPR (n=18), and HC (n=72) groups.

| ID                                   | CP-median                | CP-mean     | CP-se      | CPR-median               | CPR-mean    | CPR-se      |
|--------------------------------------|--------------------------|-------------|------------|--------------------------|-------------|-------------|
| Bacteroides                          | 0.0177(0.0022,0.141)     | 0.127727194 | 0.03439301 | 0.6225(0.2699,0.7493)    | 0.519280944 | 0.070080003 |
| Faecalibacterium                     | <0.0001(<0.0001,0.0161)  | 0.030271694 | 0.01259806 | 0.0003(<0.0001,0.0481)   | 0.047903778 | 0.026126881 |
| Lachnospiraceae_incertae_sedis       | 0.016(0.001,0.0442)      | 0.0608655   | 0.01999701 | 0.0229(0.0082,0.0325)    | 0.029207722 | 0.008174449 |
| Prevotella                           | <0.0001(<0.0001,0.0012)  | 0.014059694 | 0.00968782 | <0.0001(<0.0001,<0.0001) | 0.0095695   | 0.007838278 |
| Blautia                              | 0.0087(0.0003,0.0399)    | 0.0361095   | 0.01155065 | 0.011(0.0052,0.0219)     | 0.0209135   | 0.006781966 |
| Akkermansia                          | <0.0001(<0.0001,0.0025)  | 0.095861861 | 0.04229983 | <0.0001(<0.0001,0.0006)  | 0.031104667 | 0.020288154 |
| Ruminococcaceae_uncultured           | 0.0011(0.0002,0.0085)    | 0.007122722 | 0.00208299 | 0.0046(0.0004,0.0233)    | 0.0187355   | 0.007556245 |
| Megamonas                            | <0.0001(<0.0001,0.0004)  | 0.004374167 | 0.00234968 | <0.0001(<0.0001,0.0115)  | 0.020937889 | 0.013097664 |
| Pseudobutyrvibrio                    | <0.0001(<0.0001,0.0024)  | 0.011526278 | 0.00438339 | 0.0002(<0.0001,0.0034)   | 0.005344444 | 0.003061276 |
| Streptococcus                        | 0.0019(0.0002,0.0068)    | 0.056340444 | 0.02468149 | <0.0001(<0.0001,0.0002)  | 0.000116222 | 2.91E-05    |
| Enterococcus                         | <0.0001(<0.0001,0.0002)  | 0.055448167 | 0.03782488 | <0.0001(<0.0001,<0.0001) | 1.07E-05    | 6.41E-06    |
| Bifidobacterium                      | <0.0001(<0.0001,0.0001)  | 0.019327639 | 0.01583695 | <0.0001(<0.0001,0.0015)  | 0.003575722 | 0.001893516 |
| Roseburia                            | 0.0002(<0.0001,0.0042)   | 0.006452722 | 0.00230425 | 0.0002(<0.0001,0.0025)   | 0.003230944 | 0.002183897 |
| Alistipes                            | 0.0001(<0.0001,0.0017)   | 0.002361528 | 0.0010719  | 0.0014(<0.0001,0.0187)   | 0.017904167 | 0.007722532 |
| Lachnospiraceae_unclassified         | 0.0006(<0.0001,0.0036)   | 0.004110667 | 0.00125381 | 0.0009(0.0001,0.0039)    | 0.002385667 | 0.000869032 |
| Lachnospira                          | <0.0001(<0.0001,<0.0001) | 0.001208139 | 0.0010163  | <0.0001(<0.0001,0.0001)  | 0.013769722 | 0.013686025 |
| Ruminococcaceae_unclassified         | 0.0001(<0.0001,0.001)    | 0.006657694 | 0.00320136 | 0.0008(<0.0001,0.0025)   | 0.004092111 | 0.002354556 |
| Phascolarctobacterium                | 0.0002(<0.0001,0.002)    | 0.003233139 | 0.00174332 | 0.009(0.0039,0.0257)     | 0.027140222 | 0.012363495 |
| Anaerostipes                         | <0.0001(<0.0001,0.0008)  | 0.018294056 | 0.01241897 | 0.0001(<0.0001,0.0011)   | 0.000895556 | 0.000358549 |
| Lachnospiraceae_uncultured           | 0.0002(<0.0001,0.0018)   | 0.003662639 | 0.00154301 | 0.0018(0.0001,0.0042)    | 0.006054778 | 0.003781136 |
| Parasutterella                       | <0.0001(<0.0001,<0.0001) | 0.004115861 | 0.0031594  | <0.0001(<0.0001,0.0244)  | 0.023769556 | 0.009815556 |
| Clostridium_sensu_stricto_1          | <0.0001(<0.0001,<0.0001) | 0.003971583 | 0.00277382 | 0.0004(<0.0001,0.0008)   | 0.014792667 | 0.013123426 |
| Ruminococcus                         | <0.0001(<0.0001,0.0001)  | 0.001455889 | 0.00081465 | <0.0001(<0.0001,0.0002)  | 0.00123     | 0.000681639 |
| Peptostreptococcaceae_incertae_sedis | <0.0001(<0.0001,0.0018)  | 0.011361722 | 0.00797786 | 0.0004(0.0001,0.0013)    | 0.006028111 | 0.003975231 |
| Fusobacterium                        | <0.0001(<0.0001,0.0002)  | 0.002889528 | 0.00178837 | 0.0003(<0.0001,0.0047)   | 0.036294667 | 0.024908635 |
| Coprococcus                          | 0.0002(<0.0001,0.0019)   | 0.003779833 | 0.00157508 | 0.0005(<0.0001,0.0015)   | 0.003163444 | 0.001897727 |
| Parabacteroides                      | 0.0002(<0.0001,0.0018)   | 0.001991028 | 0.00065293 | 0.004(0.0002,0.0094)     | 0.007810833 | 0.002591288 |
| Klebsiella                           | <0.0001(<0.0001,<0.0001) | 0.0051295   | 0.0051122  | <0.0001(<0.0001,<0.0001) | 0.000216833 | 0.000207691 |
| Actinomyces                          | 0.0002(<0.0001,0.0011)   | 0.016243056 | 0.00952244 | <0.0001(<0.0001,0.0001)  | 0.000112222 | 4.20E-05    |
| Erysipelotrichaceae_incertae_sedis   | 0.0016(0.0002,0.0105)    | 0.012071472 | 0.0047276  | 0.0006(0.0004,0.0014)    | 0.001781389 | 0.00090008  |
| Rothia                               | <0.0001(<0.0001,0.0008)  | 0.014349111 | 0.00997856 | <0.0001(<0.0001,<0.0001) | 5.94E-06    | 3.27E-06    |
| Dialister                            | <0.0001(<0.0001,<0.0001) | 0.000171472 | 7.94E-05   | <0.0001(<0.0001,<0.0001) | 0.002196056 | 0.001955841 |
| Ruminococcaceae_incertae_sedis       | 0.0008(<0.0001,0.0039)   | 0.005110556 | 0.00213924 | 0.0006(0.0003,0.0018)    | 0.0024925   | 0.000984805 |
| Dorea                                | 0.0001(<0.0001,0.0036)   | 0.004738139 | 0.00200631 | 0.0002(<0.0001,0.0009)   | 0.000857167 | 0.000376957 |
| Erysipelotrichaceae_uncultured       | <0.0001(<0.0001,<0.0001) | 0.004348667 | 0.00378804 | <0.0001(<0.0001,<0.0001) | 0.000107444 | 9.70E-05    |
| Veillonella                          | 0.0004(<0.0001,0.0025)   | 0.004984722 | 0.00176786 | <0.0001(<0.0001,0.0003)  | 0.000499889 | 0.000355365 |
| Bacteria_unclassified                | 0.0001(<0.0001,0.0005)   | 0.000363639 | 0.00010857 | 0.0009(0.0002,0.0015)    | 0.001337222 | 0.000361623 |
| Sutterella                           | <0.0001(<0.0001,<0.0001) | 0.00018675  | 0.00011056 | <0.0001(<0.0001,0.0034)  | 0.004301667 | 0.001992698 |
| Christensenellaceae_uncultured       | <0.0001(<0.0001,<0.0001) | 0.00019225  | 0.00012023 | <0.0001(<0.0001,<0.0001) | 2.27E-05    | 2.02E-05    |
| Lactobacillus                        | <0.0001(<0.0001,<0.0001) | 0.004512333 | 0.00290119 | <0.0001(<0.0001,<0.0001) | 1.11E-05    | 8.79E-06    |
| Halomonas                            | 0.0018(0.0005,0.0049)    | 0.006633861 | 0.00379538 | <0.0001(<0.0001,0.0001)  | 0.000138222 | 5.54E-05    |
| Flavonifractor                       | <0.0001(<0.0001,0.0007)  | 0.002049361 | 0.00107267 | 0.0016(<0.0001,0.0073)   | 0.004902222 | 0.001553763 |
| Clostridiales_unclassified           | <0.0001(<0.0001,0.0004)  | 0.000666472 | 0.00022776 | <0.0001(<0.0001,0.0002)  | 0.000534778 | 0.000287661 |
| Barnesiella                          | <0.0001(<0.0001,<0.0001) | 0.000307806 | 0.00016952 | <0.0001(<0.0001,0.0004)  | 0.001093778 | 0.000599699 |
| Defluviitaleaceae_incertae_sedis     | <0.0001(<0.0001,<0.0001) | 0.003170139 | 0.00095717 | <0.0001(<0.0001,<0.0001) | 0.000353833 | 0.000187801 |
| Bacteroidales_unclassified           | <0.0001(<0.0001,<0.0001) | 0.000114444 | 6.90E-05   | 0.0002(<0.0001,0.001)    | 0.000860833 | 0.000314916 |
| Desulfovibrio                        | <0.0001(<0.0001,<0.0001) | 0.0003085   | 0.00025878 | <0.0001(<0.0001,<0.0001) | 5.39E-06    | 5.39E-06    |
| Peptostreptococcus                   | <0.0001(<0.0001,<0.0001) | 0.003165583 | 0.00205201 | <0.0001(<0.0001,<0.0001) | 4.33E-06    | 2.42E-06    |
| Butyrivibrio                         | <0.0001(<0.0001,<0.0001) | 0.000376611 | 0.00016075 | <0.0001(<0.0001,0.0004)  | 0.001483889 | 0.001054962 |
| Defluviitaleaceae_uncultured         | <0.0001(<0.0001,<0.0001) | 0.000101056 | 4.32E-05   | <0.0001(<0.0001,<0.0001) | 0.000395389 | 0.000280998 |
| Haemophilus                          | <0.0001(<0.0001,<0.0001) | 0.000467667 | 0.00029478 | <0.0001(<0.0001,<0.0001) | 0.000882333 | 0.000590122 |
| Odoribacter                          | <0.0001(<0.0001,<0.0001) | 4.22E-05    | 2.56E-05   | <0.0001(<0.0001,0.0002)  | 0.0002735   | 0.000118402 |
| Intestinimonas                       | <0.0001(<0.0001,<0.0001) | 0.000183833 | 7.58E-05   | 0.0002(<0.0001,0.0008)   | 0.001058833 | 0.000623331 |
| Gastranaerophilales_norank           | <0.0001(<0.0001,<0.0001) | 0           | 0          | <0.0001(<0.0001,<0.0001) | 0           | 0           |
| Atopobium                            | <0.0001(<0.0001,0.0001)  | 0.001336    | 0.00101674 | <0.0001(<0.0001,<0.0001) | 5.78E-06    | 3.29E-06    |
| Citrobacter                          | <0.0001(<0.0001,<0.0001) | 3.57E-05    | 3.11E-05   | <0.0001(<0.0001,<0.0001) | 0.0000805   | 7.53E-05    |
| Granulicatella                       | <0.0001(<0.0001,0.0002)  | 0.000831333 | 0.00041122 | <0.0001(<0.0001,<0.0001) | 1.13E-05    | 5.99E-06    |
| Pelagibacterium                      | 0.0002(<0.0001,0.0005)   | 0.000700167 | 0.00032031 | <0.0001(<0.0001,<0.0001) | 1.64E-05    | 5.04E-06    |
| Candidate_division_TM7_norank        | <0.0001(<0.0001,0.0004)  | 0.000604167 | 0.00032429 | <0.0001(<0.0001,<0.0001) | 7.52E-05    | 2.94E-05    |
| Solobacterium                        | <0.0001(<0.0001,0.0002)  | 0.000659639 | 0.00050237 | <0.0001(<0.0001,<0.0001) | 1.86E-05    | 1.03E-05    |

Table S35. The different degree of phylum level (p value) among the CP (n=36), CPR (n=18), and HC (n=72) groups.

| ID                     | CP-median                | CP-mean     | CP-se      | CPR-median               | CPR-mean    | CPR-se      |
|------------------------|--------------------------|-------------|------------|--------------------------|-------------|-------------|
| Firmicutes             | 0.5119(0.28,0.9144)      | 0.553595806 | 0.05638764 | 0.2331(0.1175,0.5132)    | 0.299412556 | 0.051511286 |
| Bacteroidetes          | 0.0277(0.004,0.2022)     | 0.1508595   | 0.03737957 | 0.6986(0.4116,0.7706)    | 0.565652611 | 0.070245964 |
| Proteobacteria         | 0.0127(0.0067,0.0984)    | 0.142877944 | 0.04581756 | 0.0222(0.0121,0.0559)    | 0.062115667 | 0.024326538 |
| Verrucomicrobia        | <0.0001(<0.0001,0.0025)  | 0.095861861 | 0.04229983 | <0.0001(<0.0001,0.0006)  | 0.031104667 | 0.020288154 |
| Actinobacteria         | 0.002(0.001,0.0097)      | 0.052794667 | 0.02308184 | 0.0005(0.0002,0.0016)    | 0.003843778 | 0.001903536 |
| Fusobacteria           | <0.0001(<0.0001,0.0004)  | 0.002906278 | 0.00178769 | 0.0003(<0.0001,0.0047)   | 0.036434833 | 0.025037048 |
| Bacteria_unclassified  | 0.0001(<0.0001,0.0005)   | 0.000363639 | 0.00010857 | 0.0009(0.0002,0.0015)    | 0.001337222 | 0.000361623 |
| Cyanobacteria          | <0.0001(<0.0001,<0.0001) | 9.21944E-05 | 4.7013E-05 | <0.0001(<0.0001,<0.0001) | 2.77778E-06 | 2.77778E-06 |
| Tenericutes            | <0.0001(<0.0001,<0.0001) | 0           | 0          | <0.0001(<0.0001,<0.0001) | 0           | 0           |
| Candidate_division_TM7 | <0.0001(<0.0001,0.0004)  | 0.000607889 | 0.00032514 | <0.0001(<0.0001,<0.0001) | 8.78889E-05 | 3.52876E-05 |
| Synergistetes          | <0.0001(<0.0001,<0.0001) | 4.02222E-05 | 3.3197E-05 | <0.0001(<0.0001,<0.0001) | 0.000008    | 4.55253E-06 |
| Lentisphaerae          | <0.0001(<0.0001,<0.0001) | 0           | 0          | <0.0001(<0.0001,<0.0001) | 0           | 0           |

| HC-median                | HC-mean    | HC-se     | p-value  | z-score    | Sig_mark | q-value  |
|--------------------------|------------|-----------|----------|------------|----------|----------|
| 0.265(0.0982,0.3631)     | 0.26885581 | 0.0226682 | 6.20E-08 | -5.4129009 | ***      | 2.64E-07 |
| 0.1068(0.0581,0.1615)    | 0.13222763 | 0.0124318 | 1.07E-11 | -6.7970002 | ***      | 1.22E-10 |
| 0.0585(0.0372,0.086)     | 0.07265825 | 0.0065386 | 1.24E-06 | -4.8498223 | ***      | 3.80E-06 |
| 0.0001(<0.0001,0.082)    | 0.08487428 | 0.0213128 | 0.002315 | -3.046575  | **       | 0.003858 |
| 0.0453(0.026,0.0726)     | 0.05754289 | 0.0059365 | 7.02E-07 | -4.9607204 | ***      | 2.34E-06 |
| <0.0001(<0.0001,<0.0001) | 0.00110303 | 0.0008894 | 0.003353 | -2.9333345 | **       | 0.005475 |
| 0.0115(0.0034,0.032)     | 0.03874226 | 0.0079997 | 6.02E-05 | -4.0119199 | ***      | 1.18E-04 |
| 0.0001(<0.0001,0.0176)   | 0.03381985 | 0.0098843 | 0.022449 | -2.2826857 | *        | 0.032653 |
| 0.0201(0.0125,0.045)     | 0.0303291  | 0.0032625 | 1.72E-08 | -5.638185  | ***      | 8.59E-08 |
| 0.0003(0.0002,0.0008)    | 0.00110222 | 0.0002838 | 2.16E-06 | -4.7379105 | ***      | 6.40E-06 |
| <0.0001(<0.0001,<0.0001) | 0.00021758 | 0.0001287 | 0.015321 | -2.4246999 | *        | 0.022698 |
| 0.0028(0.0004,0.0083)    | 0.01538711 | 0.0043942 | 9.13E-07 | -4.9094186 | ***      | 2.92E-06 |
| 0.0129(0.0064,0.0234)    | 0.01875731 | 0.0031261 | 9.44E-09 | -5.7405622 | ***      | 5.39E-08 |
| 0.0043(0.0008,0.0151)    | 0.015083   | 0.0032136 | 9.32E-05 | -3.9076943 | ***      | 1.76E-04 |
| 0.0154(0.0104,0.0243)    | 0.01801614 | 0.0014937 | 8.53E-14 | -7.4619016 | ***      | 1.36E-12 |
| 0.007(0.0018,0.0141)     | 0.01468497 | 0.0029471 | 2.75E-15 | -7.9017961 | ***      | 7.33E-14 |
| 0.0083(0.0042,0.0179)    | 0.01327353 | 0.0017157 | 1.46E-09 | -6.0492408 | ***      | 1.16E-08 |
| 0.0017(<0.0001,0.0108)   | 0.00744115 | 0.0014056 | 0.001016 | -3.2860195 | **       | 0.001806 |
| 0.0043(0.0012,0.0087)    | 0.00635013 | 0.0008668 | 5.33E-08 | -5.4399072 | ***      | 2.51E-07 |
| 0.0081(0.0046,0.0109)    | 0.00999506 | 0.0011991 | 1.74E-09 | -6.0206592 | ***      | 1.26E-08 |
| 0.0015(<0.0001,0.0054)   | 0.00481474 | 0.0008731 | 3.02E-05 | -4.1721385 | ***      | 6.52E-05 |
| 0.0009(0.0001,0.0029)    | 0.00704199 | 0.0026594 | 6.28E-08 | -5.4106555 | ***      | 2.64E-07 |
| 0.0072(0.001,0.0162)     | 0.01156374 | 0.0016251 | 5.59E-09 | -5.828629  | ***      | 3.44E-08 |
| 0.0025(0.001,0.0056)     | 0.0046939  | 0.0007962 | 3.40E-06 | -4.6448501 | ***      | 9.72E-06 |
| <0.0001(<0.0001,<0.0001) | 0.00081203 | 0.0004279 | 0.011139 | -2.5382963 | *        | 0.017137 |
| 0.0019(0.0009,0.0047)    | 0.00636154 | 0.0012842 | 4.99E-05 | -4.0559578 | ***      | 1.02E-04 |
| 0.0046(0.0013,0.0089)    | 0.00592499 | 0.0006686 | 2.34E-05 | -4.2295761 | ***      | 5.51E-05 |
| <0.0001(<0.0001,0.0009)  | 0.00562682 | 0.0020958 | 5.32E-05 | -4.0411781 | ***      | 1.06E-04 |
| <0.0001(<0.0001,<0.0001) | 6.2875E-05 | 1.29E-05  | 1.23E-05 | -4.3725113 | ***      | 3.17E-05 |
| 0.0001(<0.0001,0.0006)   | 0.00106535 | 0.0005063 | 1.70E-05 | -4.3003948 | ***      | 4.26E-05 |
| <0.0001(<0.0001,<0.0001) | 3.06E-05   | 8.13E-06  | 3.65E-09 | -5.8994898 | ***      | 2.43E-08 |
| 0.0001(<0.0001,0.0071)   | 0.00621938 | 0.0014484 | 2.47E-05 | -4.2175814 | ***      | 5.64E-05 |
| 0.0027(0.0015,0.0046)    | 0.00361693 | 0.0004209 | 0.006032 | -2.7460122 | **       | 0.009463 |
| 0.0025(0.0013,0.0059)    | 0.00368271 | 0.0004124 | 2.71E-05 | -4.1966273 | ***      | 6.02E-05 |
| 0.0014(0.0003,0.0032)    | 0.00241574 | 0.0003621 | 1.31E-10 | -6.4262145 | ***      | 1.31E-09 |
| 0.0001(<0.0001,0.0003)   | 0.00167268 | 0.0011545 | 0.030603 | -2.1621981 | *        | 0.041495 |
| 0.0027(0.0013,0.0046)    | 0.00342975 | 0.0003254 | 1.27E-14 | -7.7091098 | ***      | 2.53E-13 |
| 0.0003(<0.0001,0.0014)   | 0.0025694  | 0.0006411 | 9.46E-05 | -3.904144  | ***      | 1.76E-04 |
| <0.0001(<0.0001,0.0028)  | 0.0035986  | 0.0015384 | 4.09E-06 | -4.6068656 | ***      | 1.13E-05 |
| <0.0001(<0.0001,0.0002)  | 0.00140564 | 0.000752  | 0.004472 | -2.8428179 | **       | 0.007155 |
| <0.0001(<0.0001,<0.0001) | 0          | 0         | 3.09E-25 | -10.379109 | ***      | 2.47E-23 |
| 0.0002(<0.0001,0.0008)   | 0.00090871 | 0.0002697 | 0.012566 | -2.4958507 | *        | 0.018967 |
| 0.0023(0.0011,0.0033)    | 0.00265503 | 0.0003335 | 6.96E-12 | -6.8584805 | ***      | 9.28E-11 |
| <0.0001(<0.0001,0.0012)  | 0.00224179 | 0.0009473 | 0.027947 | -2.1980299 | *        | 0.039224 |
| 0.0004(<0.0001,0.0021)   | 0.00149308 | 0.0002771 | 6.71E-08 | -5.3987615 | ***      | 2.68E-07 |
| 0.0005(<0.0001,0.0014)   | 0.00166189 | 0.0003943 | 2.11E-07 | -5.1893073 | ***      | 8.04E-07 |
| <0.0001(<0.0001,0.0008)  | 0.00170515 | 0.0004708 | 0.002122 | -3.0726498 | **       | 0.003611 |
| <0.0001(<0.0001,<0.0001) | 3.33E-06   | 1.56E-06  | 2.11E-05 | -4.2528242 | ***      | 5.12E-05 |
| 0.0001(<0.0001,0.0006)   | 0.00061949 | 0.0001557 | 0.029123 | -2.1818203 | *        | 0.040169 |
| 0.0003(<0.0001,0.0011)   | 0.00095064 | 0.0002009 | 2.65E-07 | -5.1467357 | ***      | 9.64E-07 |
| <0.0001(<0.0001,0.0003)  | 0.00048043 | 0.0001989 | 0.038192 | -2.0727859 | *        | 0.050923 |
| 0.0002(<0.0001,0.0007)   | 0.00076043 | 0.0002665 | 4.22E-05 | -4.0952541 | ***      | 8.88E-05 |
| 0.0002(<0.0001,0.0006)   | 0.00045732 | 7.69E-05  | 9.27E-04 | -3.3116646 | ***      | 0.001686 |
| <0.0001(<0.0001,<0.0001) | 0.00074761 | 0.0003984 | 0.027344 | -2.2065718 | *        | 0.039063 |
| <0.0001(<0.0001,<0.0001) | 8.33E-06   | 2.60E-06  | 6.74E-07 | -4.9688173 | ***      | 2.34E-06 |
| <0.0001(<0.0001,<0.0001) | 0.00058176 | 0.0002676 | 0.001797 | -3.121905  | **       | 0.003125 |
| <0.0001(<0.0001,<0.0001) | 5.46E-06   | 2.21E-06  | 1.16E-09 | -6.0862738 | ***      | 1.03E-08 |
| <0.0001(<0.0001,<0.0001) | 0          | 0         | 1.04E-19 | -9.084561  | ***      | 4.16E-18 |
| <0.0001(<0.0001,<0.0001) | 0.000028   | 9.70E-06  | 1.00E-05 | -4.4166752 | ***      | 2.67E-05 |
| <0.0001(<0.0001,<0.0001) | 7.07E-06   | 2.16E-06  | 1.09E-08 | -5.7165905 | ***      | 5.80E-08 |
| HC-median                | HC-mean    | HC-se     | p-value  | z-score    | Sig_mark | q-value  |
| 0.5909(0.3938,0.6713)    | 0.54579851 | 0.0216357 | 9.17E-04 | -3.3147068 | ***      | 0.002202 |
| 0.3379(0.2808,0.5328)    | 0.38560481 | 0.0217571 | 7.45E-09 | -5.7804655 | ***      | 4.47E-08 |
| 0.0146(0.0072,0.0267)    | 0.04566849 | 0.0112256 | 0.388705 | -0.8619678 |          | 0.424042 |
| <0.0001(<0.0001,<0.0001) | 0.00111443 | 0.0008893 | 0.005919 | -2.7522124 | **       | 0.010148 |
| 0.0032(0.001,0.009)      | 0.01627692 | 0.004421  | 0.004856 | -2.8164144 | **       | 0.009713 |
| <0.0001(<0.0001,0.0001)  | 0.00082757 | 0.0004281 | 0.022532 | -2.2812838 | *        | 0.033797 |
| 0.0027(0.0013,0.0046)    | 0.00342975 | 0.0003254 | 1.27E-14 | -7.7091098 | ***      | 1.52E-13 |
| <0.0001(<0.0001,<0.0001) | 0.00075638 | 0.0003982 | 0.094346 | -1.6729062 |          | 0.125794 |
| <0.0001(<0.0001,<0.0001) | 0.0004219  | 0.0001954 | 9.40E-05 | -3.9055934 | ***      | 2.82E-04 |
| <0.0001(<0.0001,<0.0001) | 2.8472E-05 | 9.693E-06 | 1.30E-05 | -4.3605838 | ***      | 5.19E-05 |
| <0.0001(<0.0001,<0.0001) | 0.0000565  | 2.242E-05 | 0.506588 | -0.6641594 |          | 0.506588 |
| <0.0001(<0.0001,<0.0001) | 1.6278E-05 | 1.171E-05 | 0.215157 | -1.2395081 |          | 0.258189 |

Table S36. The relative abundance and distribution of the key 76 OTUs among CP (n=36), CPR (n=18), and HC (n=72) groups.

|                                                | CP01       | CP21       | CP22       | CP24       | CP25       | CP26       | CP27       | CP28       | CP29       |
|------------------------------------------------|------------|------------|------------|------------|------------|------------|------------|------------|------------|
| OTU172 (Actinomyces)                           | 0          | 0.10092293 | 0          | 0.01559419 | 0.00037821 | 9.84E-05   | 0.00034643 | 0.0574278  | 0.03519369 |
| OTU624 (Halomonas)                             | 0.0040274  | 0.12099964 | 0.01995114 | 0          | 0.00065945 | 0.00176101 | 0.01467803 | 0.19305226 | 0.00751128 |
| OTU1482 (Pelagibacterium)                      | 0.00060223 | 0.01594151 | 0.0014095  | 0          | 0          | 0.00012769 | 0.00179804 | 0.01589285 | 0.00374741 |
| OTU1973 (Phyllobacteriaceae_unclassified)      | 0          | 0.01414359 | 0.00102357 | 0          | 0          | 0.00026335 | 0.00108824 | 0.00679904 | 0.00194465 |
| OTU1770 (Xanthomonadaceae_uncultured)          | 0          | 0.00557353 | 0.00142628 | 0          | 0.0004267  | 0.00019153 | 0.00100916 | 0.00571595 | 0.00284666 |
| OTU2051 (Atopobium)                            | 0          | 0.0104279  | 0          | 0.00645277 | 0          | 0          | 0          | 0.00058278 | 0.0084209  |
| OTU295 (Solobacterium)                         | 0.00063987 | 0.00988853 | 0.00012081 | 0          | 0          | 0.00019685 | 0.00036714 | 2.24E-05   | 0.02302286 |
| OTU495 (Granulicatella)                        | 0.00175023 | 0          | 7.38E-05   | 0.38806238 | 0          | 0          | 0          | 0          | 0.00019763 |
| OTU953 (Streptococcus)                         | 0.00169377 | 0.02211435 | 9.73E-05   | 0.01183008 | 0.0017844  | 5.59E-05   | 0.00013179 | 0.53266894 | 0.13366255 |
| OTU315 (Streptococcus)                         | 0.00099744 | 0.0098286  | 0.00015437 | 0.5201649  | 0.00037821 | 0          | 0.00018828 | 0.12984563 | 0.31929851 |
| OTU920 (Rothia)                                | 0.00062105 | 0.01342443 | 8.73E-05   | 0.03566947 | 0.00067885 | 5.85E-05   | 7.91E-05   | 0.05166573 | 0.43840344 |
| OTU1337 (Erysipelotrichaceae_Incertae_Sedis)   | 0.02008055 | 0.59534939 | 0.00316466 | 0          | 0.00233717 | 0.00174239 | 0.0096887  | 1.40E-05   | 5.45E-05   |
| OTU1891 (Candidate_division_TM7_norank)        | 0          | 0.03475968 | 0.00033224 | 0          | 0.00026184 | 0.00026069 | 0.0009395  | 0          | 0.01389125 |
| OTU1222 (Streptococcus)                        | 0.00043285 | 0          | 5.37E-05   | 0          | 0          | 0          | 0          | 0.00062191 | 0.00053209 |
| OTU974 (Clostridium_sensu_stricto_1)           | 0          | 0          | 0          | 0          | 0          | 0          | 0.00014874 | 5.59E-05   | 0          |
| OTU1742 (Peptostreptococcaceae_Incertae_Sedis) | 0.00052695 | 0          | 0.01790736 | 0          | 0          | 0          | 0.00014309 | 3.35E-05   | 0.00017483 |
| OTU1966 (Roseburia)                            | 0          | 0          | 0.0002819  | 0          | 0.34898561 | 0.0075149  | 0          | 0.00054225 | 0.00082473 |
| OTU1372 (Lachnospiraceae_Incertae_Sedis)       | 0          | 0.00179791 | 0.00020136 | 0          | 0          | 0.01067248 | 0          | 2.38E-05   | 0.00018623 |
| OTU2145 (Lachnospira)                          | 0          | 0          | 0          | 0          | 0          | 0          | 0          | 0          | 0          |
| OTU1360 (Lachnospira)                          | 0          | 0          | 0          | 0          | 0          | 0          | 0          | 0          | 0          |
| OTU1610 (Lachnospiraceae_unclassified)         | 0.00062105 | 0          | 0          | 0          | 0          | 0.00890349 | 0.00040668 | 2.52E-05   | 0          |
| OTU874 (Roseburia)                             | 0          | 0          | 0          | 0          | 0          | 0.00042828 | 8.10E-05   | 0          | 2.28E-05   |
| OTU1205 (Roseburia)                            | 0          | 0          | 0.00015437 | 0          | 0          | 0.02704565 | 0.00030689 | 0          | 0          |
| OTU1682 (Lachnospiraceae_unclassified)         | 0          | 0          | 0.00178537 | 0          | 0          | 0.00450894 | 0.00030124 | 2.10E-05   | 7.60E-05   |
| OTU1720 (Ruminococcaceae_uncultured)           | 0          | 0          | 0.00677231 | 0          | 0          | 0.01095446 | 0          | 7.13E-05   | 4.05E-05   |
| OTU324 (Erysipelotrichaceae_uncultured)        | 0          | 0          | 0          | 0          | 0          | 0          | 0          | 0          | 4.43E-05   |
| OTU779 (Lachnospiraceae_uncultured)            | 0          | 0          | 0          | 0          | 0          | 0          | 0          | 0          | 0          |
| OTU2135 (Lachnospiraceae_Incertae_Sedis)       | 0          | 0          | 6.38E-05   | 0          | 0          | 0          | 0          | 0          | 0.00043327 |
| OTU1056 (Lachnospiraceae_Incertae_Sedis)       | 0          | 0          | 0          | 0          | 0          | 0          | 0          | 0          | 0          |
| OTU798 (Faecalibacterium)                      | 0.5953779  | 0          | 0.62711006 | 0          | 0.06754529 | 0.06907853 | 0.31817771 | 0.00052268 | 0.00092988 |
| OTU178 (Ruminococcaceae_unclassified)          | 0.1268255  | 0          | 0.15223272 | 0          | 0.00942628 | 0.00999681 | 0.15510775 | 0.00013836 | 8.23E-05   |
| OTU639 (Faecalibacterium)                      | 0.03255796 | 0          | 0.03419044 | 0          | 0.00512045 | 0.00325069 | 0.10751336 | 4.89E-05   | 1.52E-05   |
| OTU1443 (Lachnospiraceae_unclassified)         | 0.00730202 | 0          | 0.00040607 | 0          | 0          | 0          | 0.00046504 | 0          | 0          |
| OTU1087 (Faecalibacterium)                     | 0.00434734 | 0          | 0.00132225 | 0          | 0.00077583 | 0.00310172 | 0.01090873 | 0          | 0          |
| OTU170 (Faecalibacterium)                      | 0          | 0          | 0.00010739 | 0          | 0          | 0.00017291 | 0.00191665 | 0          | 0          |
| OTU940 (Lachnospiraceae_unclassified)          | 0          | 0          | 0          | 0          | 0          | 0.00033252 | 0          | 0          | 0          |
| OTU1626 (Blautia)                              | 0          | 0          | 0.00934633 | 0          | 0          | 0.03563258 | 7.53E-05   | 0.00018308 | 0          |
| OTU602 (Ruminococcaceae_uncultured)            | 0          | 0          | 0          | 0          | 0          | 0.00041498 | 0          | 0          | 0          |
| OTU1406 (Sphingomonas)                         | 0          | 0          | 0          | 0          | 0          | 0          | 0          | 2.10E-05   | 0          |
| OTU530 (Blautia)                               | 0.01467931 | 0          | 0.01684688 | 0          | 0.00285116 | 0.00015429 | 0.00534705 | 0          | 7.22E-05   |
| OTU1848 (Blautia)                              | 0.00122328 | 0          | 0.0002517  | 0          | 0          | 0          | 0.00012615 | 0          | 0          |
| OTU1431 (Lachnospiraceae_Incertae_Sedis)       | 0          | 0          | 0          | 0          | 0.00140618 | 0.00020217 | 0          | 0          | 0          |
| OTU1776 (Holdemanella)                         | 0          | 0          | 0          | 0          | 0          | 0          | 0          | 0          | 0          |
| OTU979 (Lachnospiraceae_unclassified)          | 0          | 0          | 0          | 0          | 0          | 0.00772239 | 0.00608133 | 6.71E-05   | 0.00015583 |
| OTU1874 (Dorea)                                | 0          | 0          | 7.72E-05   | 0          | 0.00197835 | 0.00115716 | 0.00058742 | 0          | 4.18E-05   |
| OTU1341 (Lachnospiraceae_Incertae_Sedis)       | 0          | 0          | 0          | 0          | 0          | 0.00011173 | 0.0001638  | 0          | 0          |
| OTU1648 (Lachnospiraceae_Incertae_Sedis)       | 0          | 0          | 6.38E-05   | 0          | 0          | 0.0458555  | 0.30569875 | 0.00043743 | 0.0002217  |
| OTU1893 (Lachnospiraceae_Incertae_Sedis)       | 0          | 0          | 0          | 0          | 0          | 0.00086721 | 0.00191289 | 0          | 0          |
| OTU1512 (Lachnospiraceae_uncultured)           | 0          | 0          | 5.03E-05   | 0          | 0          | 0.00886359 | 4.71E-05   | 0.00014674 | 7.98E-05   |
| OTU1533 (Lachnospiraceae_uncultured)           | 0          | 0          | 0          | 0          | 0          | 0.00209087 | 0          | 2.93E-05   | 1.90E-05   |
| OTU385 (Bacteroides)                           | 0.01213866 | 0          | 0.00383585 | 0.00501882 | 0.0799294  | 0.03173016 | 0.00072863 | 0.00019985 | 0.00056249 |
| OTU2105 (Bacteroides)                          | 0          | 0          | 0          | 0          | 0          | 0.00052671 | 0          | 0          | 2.03E-05   |
| OTU1653 (Phascolarctobacterium)                | 0.01575203 | 0.044828   | 5.03E-05   | 0          | 0.00074673 | 0.0052458  | 0.00918789 | 9.92E-05   | 0.00062077 |
| OTU1305 (Bacteroides)                          | 0          | 0          | 0.00043627 | 0          | 0.00782614 | 0.0166711  | 0.00040291 | 0          | 1.65E-05   |
| OTU2162 (Bacteroides)                          | 0.0439062  | 0          | 0.03434817 | 0.01039613 | 0.17360061 | 0.31139604 | 0.01039662 | 0.00150376 | 0.00312411 |
| OTU119 (Bacteroides)                           | 0.0358514  | 0          | 0.03573083 | 0.00681126 | 0.21521393 | 0.32749255 | 0.01104806 | 0.00134723 | 0.00240832 |
| OTU1805 (Bacteroides)                          | 0          | 0          | 0          | 0          | 0          | 9.04E-05   | 0          | 0          | 0          |
| OTU524 (Bacteroides)                           | 0.00173141 | 0          | 0          | 0          | 0.00447069 | 0.01415461 | 0.00012238 | 0          | 0          |
| OTU1537 (Bacteroides)                          | 0          | 0          | 0          | 0          | 0          | 0.00018887 | 5.27E-05   | 0          | 0          |
| OTU931 (Bacteroides)                           | 0.00190078 | 0          | 0          | 0          | 0          | 7.45E-05   | 0          | 0          | 3.29E-05   |
| OTU1543 (Bacteroides)                          | 0.01050136 | 0          | 0.00058729 | 0          | 0.0089026  | 0.00094967 | 0.00675536 | 3.77E-05   | 0.00063597 |
| OTU1079 (Bacteroides)                          | 0          | 0          | 9.73E-05   | 0          | 0.0039955  | 0.0008406  | 0.00473327 | 0          | 0.00018243 |
| OTU2170 (Parabacteroides)                      | 0          | 0          | 0          | 0          | 0          | 0          | 3.01E-05   | 0          | 0          |
| OTU2043 (Bacteroides)                          | 0.00048931 | 0          | 4.70E-05   | 0          | 0          | 0.00121568 | 0          | 0          | 0          |
| OTU1467 (Bacteroides)                          | 0          | 0          | 0          | 0          | 0          | 0.00109864 | 0          | 0          | 0          |
| OTU56 (Bacteroides)                            | 0          | 0          | 0.00010739 | 0          | 0.01957989 | 0.01555118 | 0.00049517 | 6.57E-05   | 0          |
| OTU958 (Parabacteroides)                       | 0.0079607  | 0          | 0.00129204 | 0          | 0.02259591 | 0          | 0.00163612 | 0          | 0.00012415 |
| OTU1721 (Parabacteroides)                      | 0          | 0          | 0          | 0          | 0.00182319 | 0          | 0          | 0          | 0          |
| OTU189 (Clostridium_sensu_stricto_1)           | 0          | 0          | 0          | 0          | 0          | 0          | 0          | 0          | 0          |
| OTU1605 (Bacteria_unclassified)                | 0          | 0          | 0          | 0          | 0          | 0          | 0          | 0          | 0          |
| OTU709 (Bacteroides)                           | 0          | 0          | 0          | 0          | 0          | 0          | 3.39E-05   | 0          | 0          |
| OTU394 (Ruminococcaceae_uncultured)            | 0.00991795 | 0          | 0          | 0          | 0          | 0.0007209  | 0.00018828 | 0          | 0          |
| OTU1192 (Anaerotruncus)                        | 0.00067751 | 0          | 0          | 0          | 0.00079522 | 0          | 0.00016568 | 0          | 5.32E-05   |
| OTU881 (Subdoligranulum)                       | 0.03517389 | 0          | 0.01069878 | 0          | 0.00198805 | 0.00649872 | 0.00250784 | 1.12E-05   | 5.19E-05   |
| OTU1554 (Subdoligranulum)                      | 0.0029735  | 0          | 0.01461517 | 0          | 0.01162768 | 0.00126889 | 0.0039651  | 5.87E-05   | 1.90E-05   |
| OTU938 (Lachnospiraceae_Incertae_Sedis)        | 0.00671861 | 0          | 0.00108733 | 0          | 0.00191047 | 0.00049479 | 0.00171896 | 0          | 0          |

| CP30       | CP31       | CP32       | CP33       | CP34       | CP35       | CP36       | CP20       | CP19       | CP23       | CP17       | CP02       |            |
|------------|------------|------------|------------|------------|------------|------------|------------|------------|------------|------------|------------|------------|
| 0.15260224 |            | 0          | 0.00031512 | 0.00028937 | 0.00105677 | 0.00021732 | 0          | 0          | 0.00133468 | 0          | 0.00772916 | 0.01131369 |
| 0.01013113 | 0.03320313 | 0.025367   | 0.00070275 | 0.00295739 | 0.00386963 | 0.01013177 | 0.00164231 | 0.03951466 | 0.57726641 | 0.0733312  | 0.0056595  |            |
| 0.00132463 |            | 0          | 0.00366189 | 0          | 0.00018533 | 0.000581   | 0.0011194  | 3.79E-05   | 0.01073812 | 0.07630198 | 0.00625998 | 0.00043739 |
| 0.00064802 |            | 0          | 0.00201024 | 0          | 0.00010252 | 0.00037255 | 0.00090968 | 0.0001626  | 0.00622851 | 0.03929485 | 0.00268285 | 0.0001511  |
| 0.00063743 |            | 0          | 0.0014452  | 0          | 7.10E-05   | 0.00012418 | 0.00035951 | 0.00015899 | 0.00370071 | 0.01996142 | 0.00517407 | 0.00027038 |
| 0.03841845 |            | 0          | 0.00027165 | 0.00041338 | 0.00020505 | 0.0003038  | 0          | 0          | 0.00040445 | 0.00215314 | 0          | 0.00586626 |
| 7.20E-05   |            | 0          | 0.00025535 | 0.00012126 | 9.07E-05   | 0.00045682 | 0          | 0          | 0.0144186  | 0.01031714 | 0.08476525 | 0.00057523 |
| 0.01174694 |            | 0          | 0.00022819 | 0.00044094 | 9.46E-05   | 0.00010644 | 0.00038947 | 3.61E-05   | 0.00562184 | 0.00103171 | 0.00568508 | 0.02207336 |
| 0.59895851 | 0.02734375 | 0.00160276 | 0.05547303 | 0.00713322 | 0.00033929 | 0.01249312 | 0          | 0          | 0.0117088  | 0.09020769 | 0.1029703  | 0.11553857 |
| 0.0652202  | 0.03125    | 0.00034772 | 0.01816674 | 0.00087933 | 0.00111765 | 0.00317026 | 0.00010298 | 0.01953488 | 0.07239941 | 0.07396998 | 0.81354939 |            |
| 0.11410755 |            | 0          | 0.00012496 | 0.00015708 | 0.00060331 | 0          | 0.00564873 | 0          | 0.01761375 | 0.00143543 | 0.06215267 | 0.02002693 |
| 0          |            | 0          | 0.06556086 | 0          | 0.01472386 | 0          | 0.00796379 | 0.00014454 | 0.15690597 | 0          | 0.38192271 | 0          |
| 0.00150675 |            | 0          | 0          | 0.00027559 | 0.00036277 | 0.00088702 | 0.00012256 | 0.00013189 | 0.00091001 | 0          | 0.02983073 | 0          |
| 0.00328775 |            | 0          | 0          | 0.06278437 | 0.00010647 | 0.00520681 | 0          | 0.00038664 | 0.00141557 | 0.10406854 | 0          | 6.63E-05   |
| 0          |            | 0          | 0          | 0          | 0          | 0.00451272 | 0          | 0          | 0          | 0          | 0.00166081 | 0.00057788 |
| 0          |            | 0          | 0          | 0.00034448 | 0.15954133 | 0.61164258 | 0          | 0          | 0          | 0          | 0          | 0.00223994 |
| 0.00026048 | 0.05761719 |            | 0          | 0.0212919  | 0          | 0.00529551 | 0.10129316 | 0          | 0          | 0.00089714 | 0          | 0          |
| 0          |            | 0          | 0          | 0          | 0          | 0.00660387 | 0.02007561 | 0          | 0          | 0          | 0          | 0          |
| 0          | 0.09277344 |            | 0          | 0.00011024 | 0          | 0.0731836  | 0          | 0          | 0          | 0          | 0          | 0.00034196 |
| 0          | 0.03125    |            | 0          | 0          | 0          | 0.00707842 | 0          | 0          | 0          | 0          | 0          | 0          |
| 0          |            | 0          | 0.00011409 | 0          | 0          | 9.31E-05   | 0.00156607 | 0          | 0          | 0          | 0          | 0          |
| 0          |            | 0          | 0          | 0          | 0          | 0.00028163 | 0.0013155  | 0          | 0          | 0          | 0          | 0          |
| 0          |            | 0          | 0          | 0          | 0          | 0.00167647 | 0.00214619 | 0          | 0          | 0          | 0.00217183 | 9.01E-05   |
| 0          |            | 0          | 0          | 0          | 0          | 0.0012884  | 0.00199095 | 0          | 0          | 0          | 0          | 0          |
| 0          |            | 0          | 0          | 0.00173896 | 0          | 0.01291058 | 0.00073265 | 0          | 0          | 0          | 0          | 9.81E-05   |
| 0          |            | 0          | 0          | 0          | 0          | 0.0160972  | 0.00909135 | 0          | 0          | 0          | 0          | 0          |
| 0          |            | 0          | 0.00022276 | 0          | 0          | 0          | 0.00019065 | 0          | 0          | 0          | 0          | 0          |
| 0          | 0.03515625 |            | 0          | 0          | 0          | 0.00860853 | 0.06245472 | 0          | 0          | 0          | 0          | 6.36E-05   |
| 0          |            | 0          | 0          | 0          | 0          | 5.99E-05   | 0          | 0          | 0          | 0          | 0          | 0          |
| 0          | 0.06542969 | 0.00027165 |            | 0          | 0          | 0.05689348 | 0.01826169 | 0.60855771 | 0.00388271 | 0.00179429 | 0          | 0.00025183 |
| 2.12E-05   | 0.03320313 |            | 0          | 0          | 0          | 0.01757187 | 0.0001852  | 0.00019513 | 0          | 0.00107657 | 0          | 0          |
| 0          |            | 0          | 0          | 0          | 0          | 0.00480987 | 0.00023968 | 0.0023126  | 0          | 0          | 0          | 0          |
| 0          |            | 0          | 0          | 0          | 0          | 0.00025058 | 7.08E-05   | 0          | 0          | 0          | 0          | 0          |
| 0          |            | 0          | 0          | 0          | 0          | 0.00130614 | 0.00028325 | 0.00457642 | 0          | 0          | 0          | 0          |
| 0          |            | 0          | 0          | 0          | 0          | 0.00014858 | 7.63E-05   | 0          | 0          | 0          | 0          | 0          |
| 0          |            | 0          | 0.00023701 | 0          | 0          | 4.90E-05   | 0.00117075 | 0          | 0          | 0          | 0          | 0          |
| 0          | 0.03222656 |            | 0          | 0          | 0          | 4.88E-05   | 0.00618528 | 0.00036857 | 0          | 0          | 0          | 0          |
| 0          |            | 0          | 0          | 0          | 0          | 0.00018184 | 0.00020699 | 3.79E-05   | 0          | 0          | 0          | 0          |
| 0          |            | 0          | 0          | 0          | 0          | 0          | 0          | 0          | 0          | 0          | 0          | 0          |
| 0          | 0.06152344 | 0.01215921 | 0.00461609 | 0.01985    | 0.05565165 | 0.00325197 | 0          | 0.00026289 | 0          | 0.13752795 | 0.00036316 |            |
| 0          |            | 0          | 0          | 0          | 0.0001459  | 0.00068522 | 0          | 0          | 0          | 0          | 0          | 0          |
| 0          |            | 0          | 0.00404764 | 0.00818771 | 0.01152593 | 0.00135936 | 0.00163688 | 0.00016622 | 0          | 0.00402427 | 0          | 0          |
| 0          |            | 0          | 0          | 0          | 0          | 0          | 0          | 0          | 0          | 0          | 0          | 0          |
| 0          |            | 0          | 0.00011409 | 0.00176376 | 0.00044952 | 0.00092028 | 0.00778131 | 0          | 0          | 0          | 0.00159693 | 0          |
| 0          | 0.02441406 | 0.04935944 |            | 0          | 0.0159147  | 0.00541526 | 0.0053682  | 0          | 0          | 0          | 0.00255509 | 0          |
| 0          |            | 0          | 0          | 0          | 0.00011435 | 0.00019514 | 0.00045212 | 0          | 0          | 0          | 0          | 0          |
| 0          |            | 0          | 0.04370362 | 0.00038858 | 0.21593678 | 0.02545748 | 0.04721077 | 0.00065042 | 0          | 0          | 0          | 0.00020411 |
| 0          |            | 0          | 0.00030425 | 0          | 0.00113564 | 0.00045682 | 0.00061826 | 0          | 0          | 0          | 0          | 0          |
| 0          |            | 0          | 0.25334405 | 0.00185195 | 0.06540169 | 0.00788783 | 0.03208121 | 0          | 0          | 0          | 0          | 0          |
| 0          |            | 0          | 0.00840496 | 0.00080196 | 0.00434933 | 0.00370331 | 0.00449121 | 0          | 0          | 0          | 0          | 0          |
| 5.40E-05   | 0.0234375  | 0.15680383 | 0.18956846 | 0.02446747 | 0.01303033 | 0.01834068 | 0.34581175 | 0.30655207 | 0          | 0          | 0          | 0          |
| 0          |            | 0          | 0.00256296 | 0.00018139 | 0.00010422 | 0          | 0.01347272 | 0.01534884 | 0          | 0          | 0          | 0          |
| 8.68E-05   |            | 0          | 0.01822795 | 0.16801751 | 0.0460367  | 4.88E-05   | 0.02939574 | 0          | 0          | 0.00179429 | 0.00185244 | 0          |
| 0          | 0.02539063 | 0.00117898 | 0.00140274 | 0.00246843 | 0          | 0.01453582 | 0          | 0          | 0          | 0          | 0          | 0          |
| 0.00033672 | 0.24707031 | 0.13285486 | 0.1883669  | 0.21733661 | 0.00435083 | 0.22383852 | 8.67E-05   | 0.00212336 | 0          | 0          | 0          | 8.75E-05   |
| 0.00046801 | 0.05761719 | 0.17220659 | 0.20005181 | 0.15441519 | 0.00801423 | 0.20176108 | 0.01742221 | 0.02076845 | 0          | 0          | 0          | 0          |
| 0          |            | 0          | 0.00012496 | 0          | 0.00010647 | 0          | 0.00017976 | 0          | 0          | 0          | 0          | 0          |
| 0          |            | 0          | 0.02457921 | 0.0054153  | 0.00744868 | 0          | 0.00625337 | 0.00129542 | 0.00044489 | 0          | 0          | 0          |
| 0          |            | 0          | 0.0131263  | 0.00013779 | 0.00018139 | 0          | 0.00010894 | 0          | 0          | 0          | 0          | 0          |
| 0          |            | 0          | 0.00013039 | 0          | 0.00031545 | 0          | 0.00173221 | 0          | 0.00056623 | 0          | 0          | 0          |
| 0          |            | 0          | 0.00463984 | 0.02323755 | 0.00153784 | 0.00021954 | 0.08151715 | 0          | 0.0128817  | 0          | 0          | 0          |
| 0          | 0.02832031 | 0.00224386 | 0.01017745 | 0.00421527 | 0.00015966 | 0.03197771 | 0          | 0.00632963 | 0          | 0          | 0          | 0          |
| 0          |            | 0          | 0          | 0.00013504 | 0.00032728 | 0          | 0.00011439 | 0          | 0          | 0          | 0          | 0          |
| 0          |            | 0          | 0          | 0.00027559 | 0.00456621 | 0          | 0.00576585 | 0          | 0          | 0          | 0          | 0          |
| 0          |            | 0          | 0.00012677 | 0.00067428 | 0          | 0.00178395 | 0          | 0          | 0          | 0          | 0          | 0          |
| 1.69E-05   |            | 0          | 0.00028795 | 0.00011299 | 0.00011041 | 0          | 0.00041399 | 0          | 0.00082912 | 0          | 0.00127755 | 0          |
| 7.20E-05   | 0.09277344 | 0.00014669 | 0.01006446 | 0.01152593 | 0.00143919 | 0.00583394 | 0          | 0.00143579 | 0          | 0          | 0          | 0          |
| 0          |            | 0          | 0.00306729 | 0.00114747 | 0          | 0.0001389  | 0          | 0          | 0          | 0          | 0          | 0          |
| 0          |            | 0          | 0          | 0          | 0          | 0          | 0          | 0          | 0          | 0          | 0          | 0          |
| 0          |            | 0          | 0.00010323 | 0          | 0          | 0          | 0          | 0          | 0          | 0          | 0          | 0          |
| 0          |            | 0          | 0          | 0.00014606 | 0          | 0          | 0.00022333 | 0          | 0          | 0          | 0          | 0          |
| 0          |            | 0          | 0.00010866 | 0.00014882 | 0          | 0.00015745 | 0.00124196 | 0          | 0.00141557 | 0          | 0          | 0          |
| 0          |            | 0          | 0          | 0          | 0          | 0.00014858 | 5.45E-05   | 0          | 0          | 0          | 0          | 0          |
| 0          |            | 0          | 0          | 0.00287162 | 0          | 0.01688887 | 0.00072448 | 0.00075882 | 0.32831143 | 0          | 0.01085915 | 0.00015375 |
| 2.22E-05   |            | 0          | 0.00305075 | 0          | 0.00930484 | 0.00236953 | 0          | 0          | 0          | 0          | 0          | 0          |
| 0          |            | 0          | 0          | 0.010905   | 0          | 0.00027498 | 7.90E-05   | 0.00031256 | 0.00879676 | 0          | 0          | 0          |

| CP03       | CP04       | CP05       | CP18       | CP07       | CP08       | CP09       | CP06       | CP11       | CP12       | CP13       | CP14       |
|------------|------------|------------|------------|------------|------------|------------|------------|------------|------------|------------|------------|
| 0          | 0.02945016 | 0.00054913 | 0.00097179 | 0.00967649 | 0.0034232  | 0.00054837 | 0.0006903  | 0          | 0.00841944 | 0          | 0.00081839 |
| 0.00546124 | 0.0876978  | 0.00737212 | 0.03705941 | 0.35369728 | 0.03073776 | 0.05245558 | 0.0066293  | 0.01582349 | 0.0306766  | 0.03955657 | 0.0027075  |
| 0.00062371 | 0.01021631 | 0.00122182 | 0.00447812 | 0.03162912 | 0.00221585 | 0.00491922 | 0.00058319 | 0          | 0.00321865 | 0.00123174 | 0.00042283 |
| 0          | 0.00527466 | 0.00065896 | 0.00316489 | 0.02440786 | 0.00177552 | 0.00386549 | 0.00032135 | 0          | 0.00231768 | 0.00362485 | 0          |
| 0.00066934 | 0.00402259 | 0.00068642 | 0.0003677  | 0.02094165 | 0.00140621 | 0.00301605 | 0.00028564 | 0          | 0.0017336  | 0.00366004 | 0          |
| 0.00071498 | 0.00434227 | 0.00031575 | 0.00078794 | 0          | 0.00245732 | 0          | 0          | 0          | 0          | 0.00140771 | 0.00064789 |
| 0.00266216 | 0.00932389 | 0          | 0.00042023 | 0.01632005 | 0.00383512 | 0.0013548  | 0          | 0          | 0          | 0          | 0.00315761 |
| 0.00053243 | 0.00438223 | 0.00030202 | 0.00038084 | 0.01516464 | 0.00224425 | 0          | 0.00016663 | 0          | 0          | 0          | 0.00107072 |
| 0.00320981 | 0.02021951 | 0.00119437 | 0.18437779 | 0.01140959 | 0.05293884 | 0.00194618 | 0          | 0          | 0.00448623 | 0.00471582 | 0.08047466 |
| 0          | 0.01292024 | 0.00087861 | 0.16094973 | 0.00866551 | 0.01521264 | 0.0044945  | 0.00115447 | 0          | 0.00244816 | 0          | 0.02948919 |
| 0          | 0.0067132  | 0.0006315  | 0.02245627 | 0.0034662  | 0.00082384 | 0.00356442 | 0.00055938 | 0          | 0.00022369 | 0.00619391 | 0.0046989  |
| 0          | 0.00045287 | 0          | 0          | 0.02946274 | 0.2211869  | 0.0424451  | 0.00271361 | 0.05170493 | 0.74681397 | 0.13359141 | 0.19590807 |
| 0.00383352 | 0.000333   | 0.006974   | 0          | 0.04520508 | 0.00732934 | 0.00260746 | 0.00348722 | 0          | 0          | 0          | 0.00214826 |
| 0.136318   | 0.0002664  | 0          | 0.1453748  | 0.00332178 | 0          | 0          | 0          | 0          | 0.00428739 | 0.01045223 | 0.00017732 |
| 0.82314105 | 0.0002664  | 0          | 0.000893   | 0          | 0          | 0          | 0          | 0          | 0          | 0          | 0.00015686 |
| 0.00683035 | 0          | 0          | 0          | 0.00462161 | 0          | 0          | 0          | 0          | 0          | 0          | 0          |
| 0          | 0          | 0          | 0          | 0          | 0.00083804 | 0          | 0          | 0          | 0.00129864 | 0          | 0.04683216 |
| 0          | 0          | 0.00030202 | 0          | 0          | 0          | 0          | 0          | 0          | 0          | 0          | 0          |
| 0          | 0          | 0          | 0.00042023 | 0          | 0          | 0          | 0          | 0          | 8.70E-05   | 0          | 0.03856646 |
| 0          | 0          | 0          | 0.00157588 | 0          | 0          | 0          | 0          | 0          | 0          | 0          | 0.00643115 |
| 0          | 0          | 0.00038439 | 0          | 0          | 0.0075424  | 0          | 0.00019043 | 0          | 0          | 0          | 0.00184137 |
| 0          | 0          | 0.00138656 | 0          | 0          | 0.01340871 | 0.00375259 | 0.00057129 | 0          | 0          | 0          | 0.010564   |
| 0          | 0          | 0.00024711 | 0          | 0          | 0.07001222 | 0.04071396 | 0.00107116 | 0          | 0          | 0          | 0.08578736 |
| 0          | 0          | 0          | 0          | 0          | 0.01147695 | 0.0011075  | 0          | 0          | 0          | 0          | 0.01670872 |
| 0          | 0          | 0          | 0          | 0          | 0          | 0          | 0          | 0          | 0.00037282 | 0          | 0          |
| 0          | 0          | 0          | 0          | 0          | 0          | 0.71235719 | 0          | 0          | 0          | 0          | 0          |
| 0          | 0          | 0          | 0          | 0          | 0.00029829 | 0.0005645  | 0          | 0          | 0          | 0          | 0.00015686 |
| 0          | 0          | 0          | 0.0004465  | 0          | 0.0020738  | 0.00016666 | 0          | 0          | 0          | 0          | 0          |
| 0          | 0          | 0          | 0          | 0          | 0          | 0          | 0          | 0          | 0          | 0          | 0          |
| 0.00112571 | 0.00103895 | 0.32983718 | 0          | 0          | 0.13182864 | 0.00026343 | 0.41557468 | 0.16246936 | 0          | 0          | 0.00038873 |
| 0          | 0          | 0.09140331 | 0          | 0          | 0.08029601 | 0          | 0.0086526  | 0.01448629 | 0          | 0          | 0          |
| 0          | 0          | 0.02609758 | 0          | 0          | 0.02933155 | 0          | 0.00091644 | 0.00757745 | 0          | 0          | 0          |
| 0          | 0          | 0          | 0          | 0          | 0.0037641  | 0          | 0.00029754 | 0          | 0          | 0          | 0          |
| 0          | 0          | 0.00168859 | 0          | 0          | 0.01849379 | 0          | 0.00054748 | 0          | 0          | 0          | 0.00011594 |
| 0          | 0          | 0          | 0          | 0          | 0.00186074 | 0          | 0          | 0          | 0          | 0          | 0          |
| 0          | 0          | 0          | 0          | 0          | 0          | 0          | 0          | 0          | 0          | 0.00123174 | 0.00033417 |
| 0          | 0          | 0.00105708 | 0          | 0          | 0          | 0          | 0.00026184 | 0          | 0          | 0          | 0.00308259 |
| 0          | 0          | 0          | 0          | 0          | 0          | 0          | 0          | 0          | 0          | 0          | 0          |
| 0          | 0          | 0          | 0          | 0          | 0          | 0          | 0          | 0          | 0          | 0          | 0          |
| 0          | 0          | 0          | 0.00077481 | 0.00505488 | 0.03646203 | 0.02737561 | 0.00102355 | 0.24537553 | 0.00039146 | 0          | 0.03446771 |
| 0          | 0          | 0          | 0          | 0          | 0.00056817 | 0          | 0          | 0.00780031 | 0          | 0          | 0.00015004 |
| 0.00045637 | 0          | 0          | 0          | 0          | 0.00234368 | 0.00358055 | 0          | 0          | 0.00020505 | 0          | 0.07401623 |
| 0          | 0          | 0          | 0          | 0          | 0          | 0          | 0          | 0          | 0          | 0          | 0          |
| 0          | 0.00021312 | 0.00043931 | 0          | 0          | 0.15898696 | 0.0010161  | 0          | 0.00824604 | 0.00016155 | 0          | 0.00070927 |
| 0          | 0          | 0.00591692 | 0          | 0          | 0.03623477 | 0.03828929 | 0          | 0.02986405 | 0          | 0          | 0.0350815  |
| 0          | 0          | 0          | 0          | 0          | 0          | 0          | 0          | 0          | 0          | 0          | 0.00066835 |
| 0          | 0          | 0.00078252 | 0.00122131 | 0          | 0.00109372 | 0.00508051 | 0.00016663 | 0.00735458 | 0          | 0          | 0.02570415 |
| 0          | 0          | 0          | 0          | 0          | 0.00026988 | 0          | 0          | 0          | 0          | 0          | 0          |
| 0          | 0          | 0.00185333 | 0          | 0          | 0.00132099 | 0.00329561 | 0          | 0          | 0.00052816 | 0          | 0.03404487 |
| 0          | 0          | 0.00119437 | 0          | 0          | 0.00147723 | 0          | 0          | 0          | 0.00039146 | 0          | 0.00739276 |
| 0.00409213 | 0.01730247 | 0.00122182 | 0.04328413 | 0          | 0.00096588 | 0.00158598 | 0.00276121 | 0          | 0.01288082 | 0.05824389 | 0.16688263 |
| 0          | 0.00133198 | 0          | 0.00233755 | 0          | 0          | 0          | 0          | 0          | 0          | 0          | 0.00686763 |
| 0.0066478  | 0.00093239 | 0          | 0.02835268 | 0.39933564 | 0.00146303 | 0          | 0.00028564 | 0          | 0.01191149 | 0.00756643 | 0          |
| 0          | 0          | 0.00067269 | 0          | 0          | 0.00022727 | 0          | 0          | 0          | 0          | 0          | 0          |
| 0.00088232 | 0          | 0.01013152 | 0.01109681 | 0.00404391 | 0.00556802 | 0.00103761 | 0.00121398 | 0.00735458 | 0.0147884  | 0.05750484 | 0.00311669 |
| 0.00217537 | 0.0014119  | 0.01242415 | 0.01297473 | 0          | 0.00406238 | 0.00106449 | 0.00183288 | 0.00757745 | 0.01422296 | 0.07978181 | 0.01072086 |
| 0          | 0          | 0          | 0          | 0          | 0          | 0          | 0          | 0          | 0          | 0.00137251 | 0          |
| 0          | 0          | 0          | 0          | 0          | 0.0003409  | 0          | 0          | 0          | 0          | 0.00105578 | 0.00016368 |
| 0          | 0          | 0          | 0          | 0          | 0          | 0          | 0          | 0          | 0          | 0          | 0.00030008 |
| 0          | 0          | 0          | 0          | 0          | 0          | 0          | 0          | 0          | 0          | 0.00105578 | 0          |
| 0          | 0.00198466 | 0.00027457 | 0.00073541 | 0          | 0.00262777 | 0.00141932 | 0.00023804 | 0          | 0.00254758 | 0.04202006 | 0.0122417  |
| 0          | 0.00099899 | 0          | 0          | 0.00259965 | 0.00123576 | 0.00034408 | 0          | 0          | 0.00169632 | 0.02706317 | 0.00145264 |
| 0          | 0          | 0          | 0          | 0          | 0          | 0          | 0          | 0          | 0          | 0          | 0.0002387  |
| 0          | 0          | 0          | 0          | 0          | 0          | 0          | 0          | 0          | 0          | 0.00130213 | 0.00011594 |
| 0          | 0          | 0          | 0          | 0          | 0          | 0          | 0          | 0          | 0          | 0.00404716 | 0.00077747 |
| 0          | 0.00193138 | 0.00041185 | 0.00224563 | 0.01097631 | 0          | 0          | 0.00029754 | 0          | 0.00018019 | 0.00260426 | 0.00195049 |
| 0          | 0.00089243 | 0.00098844 | 0.0146688  | 0          | 0          | 0.00013978 | 0          | 0          | 0.00229904 | 0.01027626 | 0.00616518 |
| 0          | 0          | 0          | 0.00039397 | 0          | 0          | 0          | 0          | 0          | 0          | 0          | 0.00038191 |
| 0          | 0          | 0          | 0          | 0          | 0          | 0          | 0          | 0          | 0          | 0          | 0          |
| 0          | 0          | 0          | 0          | 0          | 0          | 0          | 0          | 0          | 0          | 0          | 0          |
| 0          | 0          | 0          | 0          | 0          | 0          | 0          | 0          | 0          | 0          | 0          | 0          |
| 0          | 0          | 0          | 0          | 0          | 0          | 0          | 0          | 0          | 0          | 0          | 0          |
| 0          | 0          | 0          | 0.00035457 | 0          | 0          | 0          | 0.0046893  | 0          | 0.00015534 | 0.00408235 | 0          |
| 0          | 0          | 0          | 0          | 0          | 0          | 0          | 0          | 0          | 0          | 0          | 0.00016368 |
| 0.00062371 | 0.42283819 | 0          | 0.04011924 | 0          | 0.00666174 | 0.03549905 | 0.42607205 | 0          | 0.00021126 | 0          | 0.00726318 |
| 0          | 0.33074485 | 0.47880344 | 0.27731523 | 0          | 0.0212778  | 0          | 0.10716369 | 0.40606196 | 0.12153203 | 0.30219954 | 0.03469276 |
| 0          | 0.0224972  | 0.01169655 | 0          | 0          | 0          | 0.00012903 | 0.00958094 | 0.02830399 | 0.00951304 | 0.19415802 | 0.00158221 |

| CP15       | CP16       | CP10       | CPR11      | CPR18      | CPR17      | CPR16      | CPR15      | CPR14      | CPR13      | CPR12      | CPR10      |
|------------|------------|------------|------------|------------|------------|------------|------------|------------|------------|------------|------------|
| 0.00365848 | 0.00586878 | 0          | 0.00021032 | 5.54E-05   | 0          | 0          | 0.00036882 | 0          | 0.00012044 | 0          | 0          |
| 0.02922078 | 0.0056913  | 0.00362929 | 7.66E-05   | 0.00178885 | 0.00405517 | 0.00114441 | 5.06E-05   | 0.00012242 | 9.32E-05   | 0          | 0.0002376  |
| 0.00312912 | 0.00165651 | 0.00043445 | 3.64E-05   | 0.0001038  | 0          | 0          | 0          | 0          | 8.18E-05   | 0          | 0          |
| 0.00169396 | 0.00107673 | 0.00022725 | 3.25E-05   | 0.00017992 | 0.00052325 | 0          | 0          | 5.92E-05   | 0          | 0          | 0          |
| 0.00092932 | 0.00022481 | 0.00024396 | 0          | 5.54E-05   | 0          | 0          | 0          | 0          | 0          | 0          | 0          |
| 0.00532303 | 0.00128971 | 0          | 0          | 0          | 0          | 0          | 0          | 0          | 0          | 0          | 0          |
| 0.0004529  | 0.00114773 | 0          | 6.88E-05   | 4.67E-05   | 0          | 0          | 0.00029702 | 5.10E-05   | 0          | 0          | 0          |
| 0.03743177 | 0.0003668  | 0          | 2.47E-05   | 0          | 0          | 0          | 0.00016483 | 0          | 0          | 0          | 0          |
| 0.31558794 | 0.02472934 | 0.00018715 | 0.00019474 | 0          | 0          | 0          | 3.92E-05   | 0.0002122  | 9.09E-05   | 0          | 0          |
| 0.04850132 | 0.00927646 | 0          | 8.96E-05   | 0          | 0          | 0          | 0.00031334 | 5.30E-05   | 0          | 0          | 0          |
| 0.04917772 | 0.00875584 | 0          | 0          | 5.02E-05   | 0          | 0          | 0          | 0          | 0          | 0          | 0          |
| 0          | 0.12299592 | 0.00048792 | 0.00069199 | 0.00349984 | 0          | 0          | 0.00171846 | 0.00014486 | 0.00734893 | 0.00741496 | 0.00136295 |
| 0          | 0.00027214 | 0          | 7.01E-05   | 6.75E-05   | 0          | 0.00032204 | 0.00085841 | 0          | 8.86E-05   | 0          | 0          |
| 0.00083522 | 0          | 0          | 9.87E-05   | 0          | 0          | 0          | 0          | 6.12E-05   | 0          | 0          | 0          |
| 0.50357025 | 0          | 0          | 0          | 0.02713892 | 0.00552318 | 0.00050032 | 0.33451977 | 0.00177714 | 0.00046811 | 0.02200299 | 0          |
| 0          | 0          | 0.00025733 | 0          | 0.00176809 | 0.00135172 | 0.00028754 | 0.05048641 | 0.00035298 | 0.0017702  | 0.00192474 | 0.00093213 |
| 0          | 0          | 0          | 0          | 3.63E-05   | 0          | 0          | 0.00079966 | 0          | 0          | 0          | 0.00321676 |
| 0          | 0          | 0          | 0          | 0          | 0          | 0          | 0          | 0          | 0          | 0          | 0          |
| 0          | 0          | 0          | 0          | 0          | 0          | 0          | 0.01286476 | 0          | 0          | 0          | 0.00037337 |
| 0          | 0.00054428 | 0          | 0          | 0          | 0          | 0          | 0.3893015  | 0          | 0.00086351 | 0          | 0          |
| 0          | 0.00020115 | 0          | 0          | 0          | 0          | 0          | 0          | 0          | 0          | 0          | 0          |
| 0          | 0.00221262 | 0          | 0          | 0          | 0.00046511 | 0          | 0          | 0          | 0          | 0          | 6.53E-05   |
| 0          | 0.01533456 | 0          | 0          | 9.00E-05   | 0.0274996  | 0          | 0.00024806 | 0          | 0.00026587 | 0          | 0.00016188 |
| 0          | 0.00203514 | 0.0001838  | 0          | 0          | 0.00975277 | 0          | 0          | 0          | 0          | 0          | 9.40E-05   |
| 0          | 0.0010294  | 7.35E-05   | 0          | 0          | 0          | 0          | 0.00106404 | 0          | 0          | 0          | 0.00068931 |
| 0          | 0          | 0          | 0          | 9.17E-05   | 0.02414209 | 0          | 0          | 0          | 0          | 0          | 0          |
| 0          | 0          | 0          | 0          | 0          | 0          | 0          | 0          | 0          | 0          | 0          | 0          |
| 0          | 0          | 0          | 0          | 0.00015224 | 0          | 0.00020128 | 0          | 0          | 0          | 0          | 0          |
| 0          | 0          | 0          | 0          | 0          | 0          | 0          | 0          | 0          | 0          | 0          | 0          |
| 0          | 0.00333669 | 0.38504238 | 0          | 0.74186801 | 0          | 0.01429648 | 6.04E-05   | 0.0947659  | 0.00187245 | 0.00027346 | 0.00076241 |
| 0          | 0.00087558 | 0.24585606 | 0          | 0.06547283 | 0          | 0.00856868 | 0          | 0.00933866 | 0.00243374 | 0          | 0          |
| 0          | 0.00028397 | 0.05837945 | 0          | 0.01397688 | 0          | 0.00319169 | 0          | 0.00460302 | 0.0010953  | 0          | 0          |
| 0          | 0          | 0.00096581 | 0          | 0.00535097 | 0          | 0          | 0          | 5.92E-05   | 0          | 0          | 0          |
| 0          | 0          | 0.01229481 | 0          | 0.00883005 | 0          | 0.00045431 | 0          | 0.00020199 | 0.00012044 | 0          | 0          |
| 0          | 0          | 0          | 0          | 0          | 0          | 0          | 0          | 0          | 0          | 0          | 0          |
| 0          | 0          | 0.00045115 | 0          | 0          | 0          | 0          | 0          | 0          | 0          | 0          | 0          |
| 0.00024704 | 0          | 7.35E-05   | 0          | 0.00036677 | 0          | 0          | 0          | 0          | 0          | 0          | 0.00039687 |
| 0          | 0          | 0          | 0          | 0          | 0          | 0          | 0          | 0          | 0          | 0          | 0          |
| 0          | 0          | 0          | 0          | 0          | 0          | 0          | 0          | 0          | 0          | 0          | 0          |
| 0          | 0.53032006 | 0          | 6.23E-05   | 0.00037888 | 0.02819726 | 0.01611373 | 0.1759354  | 0.00227703 | 0.00052038 | 0          | 0.01879142 |
| 0          | 0.00048512 | 0          | 0          | 0          | 0          | 0          | 0.00016646 | 8.77E-05   | 0          | 0          | 7.31E-05   |
| 0          | 0          | 0.00283058 | 0.00047907 | 0.00078197 | 0.00748536 | 0.00023003 | 0          | 7.14E-05   | 0.00445163 | 0.00034708 | 0.01043097 |
| 0          | 0          | 0          | 0          | 0          | 0          | 0          | 0          | 0          | 0          | 0          | 0          |
| 0          | 0.00057978 | 0          | 4.80E-05   | 0          | 0          | 0          | 0          | 0          | 0          | 0          | 0.00043604 |
| 0          | 0.00663787 | 0          | 0          | 5.71E-05   | 0.00053778 | 0.00185751 | 0          | 0          | 9.32E-05   | 0          | 0.00122195 |
| 0          | 0          | 0          | 0          | 0          | 0          | 0          | 6.69E-05   | 0          | 0          | 0          | 0          |
| 0          | 0.00244927 | 0.001173   | 0          | 0.0234851  | 0.01260156 | 0          | 0          | 0          | 0.00082942 | 0          | 0.0115276  |
| 0          | 0          | 0          | 0          | 0.00031832 | 0          | 0          | 0          | 0          | 0          | 0          | 0.00018016 |
| 0          | 0.00218896 | 0.00174781 | 0          | 0.01054451 | 0.0311478  | 0.03470605 | 7.34E-05   | 0          | 0.00700807 | 0          | 0.00178854 |
| 0          | 0          | 0          | 0          | 3.98E-05   | 0.00242729 | 0.00109265 | 0          | 0          | 0.0005272  | 0          | 0.00032115 |
| 0          | 0.00680353 | 0.18833547 | 0.87398588 | 0.01528305 | 0.24239473 | 0.00365175 | 6.36E-05   | 0.08846735 | 0.02912985 | 0.01680725 | 0.66593471 |
| 0          | 0          | 0.00755601 | 0.03478365 | 8.65E-05   | 0.00228194 | 0.00032204 | 0          | 0.00257084 | 0          | 0          | 0.04717828 |
| 0          | 0.00057978 | 0.00197506 | 0.01906142 | 0.00877815 | 0.05421433 | 0.37293906 | 0          | 0.03541224 | 0.08117456 | 0.29955225 | 0          |
| 0          | 0.00295805 | 0          | 0.00162286 | 9.86E-05   | 0.0022238  | 0.01580318 | 0          | 0.00701879 | 0.07258262 | 0.01846905 | 0.00159794 |
| 0          | 0.09730817 | 0.00053804 | 0.0002285  | 0.02584659 | 0.09383585 | 0.06178079 | 0          | 0.33425149 | 0.320642   | 0.03002798 | 0.04078915 |
| 9.41E-05   | 0.06284092 | 0.01214776 | 0.04790801 | 0.02576355 | 0.21473525 | 0.05629453 | 0          | 0.28987601 | 0.33176083 | 0.03446644 | 0.0491261  |
| 0          | 0          | 0          | 0.00254074 | 0          | 0.00581387 | 0.00065559 | 0          | 0.00245046 | 0.00546739 | 0.00685753 | 7.31E-05   |
| 0          | 0.00086375 | 0.01034983 | 0.01071604 | 0.0005934  | 0.00219474 | 0.02369903 | 0          | 0.04291051 | 0.01871091 | 0.00141989 | 0.02248077 |
| 0          | 0          | 0.00760614 | 0.00202403 | 0          | 0          | 0.00148946 | 0          | 0.00270958 | 0.00173384 | 0          | 0.00857716 |
| 0          | 0.00105307 | 0          | 0          | 0          | 0.01598814 | 0.01136932 | 0          | 0.02524112 | 0.00234739 | 0.06372662 | 0          |
| 0          | 0.03354434 | 0.02655799 | 0.00085167 | 0.01011719 | 0.07835642 | 0.02485494 | 0          | 0.01473334 | 0.01947444 | 0.1016639  | 0.04909737 |
| 0          | 0.02562859 | 0.01219121 | 0.00013892 | 0.00624539 | 0.01952007 | 0.11007022 | 0          | 0.01064448 | 0.00824653 | 0.10746966 | 0.0130707  |
| 0          | 0.00011832 | 0.00023727 | 3.64E-05   | 4.67E-05   | 0.00187497 | 0.01214568 | 0          | 0.00014486 | 0.0007158  | 0.01078062 | 0.00188254 |
| 0          | 0.00101757 | 0.00022056 | 0.00343916 | 5.88E-05   | 0.0065406  | 0.030715   | 0          | 0.00278099 | 0.03530396 | 0.04898084 | 0.00925602 |
| 0          | 0.00027214 | 0.00019383 | 4.67E-05   | 0          | 0.00453482 | 0.10366958 | 0          | 0.00041011 | 0.00754436 | 0.02997539 | 0.00613326 |
| 0          | 0.00636573 | 0.0010694  | 0          | 0          | 0.0036482  | 0.01279552 | 0          | 0          | 0.01624082 | 0.00058899 | 0.00109401 |
| 0.00014704 | 0.00599894 | 0.01533593 | 0.00024667 | 0.00029237 | 0.07135071 | 0.0658006  | 0          | 0.00264837 | 0.00394715 | 0.0456888  | 0.02215962 |
| 0          | 0          | 0.00066504 | 0.00018565 | 0          | 0.00178776 | 0.00217955 | 0          | 0.00107526 | 0.00092941 | 0.00193525 | 0.00691395 |
| 0          | 0          | 0          | 0          | 0          | 0.00098836 | 0.00231757 | 0.03053892 | 0          | 0.00055674 | 0.0007152  | 0          |
| 0          | 0          | 0          | 0          | 5.02E-05   | 0          | 0          | 0          | 0          | 0          | 0          | 0          |
| 0          | 0          | 0          | 0          | 0          | 0          | 0          | 0          | 0.00160983 | 0.0003045  | 0.03410884 | 0.00068931 |
| 0          | 0.00192865 | 0          | 0          | 0          | 0          | 0          | 0          | 0.00181387 | 0.00739438 | 0.01620775 | 0          |
| 0          | 0.00085192 | 0          | 0          | 0          | 0          | 0.00177124 | 0          | 0.00061414 | 0.00564918 | 0.00512211 | 0.00088252 |
| 0          | 0          | 0.00019049 | 0          | 4.67E-05   | 0.02200549 | 0          | 0          | 0.01796524 | 0          | 0          | 0          |
| 0          | 0          | 0          | 0          | 9.69E-05   | 0          | 0.00226581 | 0          | 0.00022852 | 0          | 0.09125139 | 0          |
| 0          | 0          | 0.00029074 | 0          | 0          | 0          | 0.00044281 | 0          | 0.00018363 | 0          | 0.00225078 | 0          |

| CPR09      | CPR08      | CPR07      | CPR06      | CPR05      | CPR04      | CPR03      | CPR02      | CPR01      | HC51       | HC50       | HC49       |
|------------|------------|------------|------------|------------|------------|------------|------------|------------|------------|------------|------------|
| 0          | 0.00014916 | 0          | 0          | 0          | 0.00021676 | 0          | 0          | 0.00030259 | 0          | 0          | 0          |
| 0.0007504  | 0.00037644 | 0.00563332 | 0.00059865 | 4.64E-05   | 0.00086003 | 0.00046899 | 0.00029797 | 9.23E-05   | 0          | 0          | 0          |
| 0.0002412  | 0.00039065 | 0          | 0          | 5.42E-05   | 0.00012586 | 0          | 5.66E-05   | 0          | 0          | 0          | 0          |
| 0          | 0          | 0          | 0          | 0          | 0          | 0          | 9.53E-05   | 0          | 0          | 0          | 0          |
| 0.00044488 | 0          | 0          | 0          | 0          | 0          | 0.00011301 | 0          | 0          | 0          | 0          | 0          |
| 0          | 0          | 0          | 0          | 0          | 0.0001818  | 0          | 8.64E-05   | 0          | 0          | 0          | 0.00012518 |
| 0          | 0          | 0          | 0          | 2.79E-05   | 0          | 0          | 8.64E-05   | 0          | 0          | 0          | 0          |
| 0          | 0          | 0          | 0.00104764 | 4.33E-05   | 0          | 0          | 3.87E-05   | 0          | 0          | 0          | 0          |
| 0.00101841 | 0          | 0.00443837 | 0.00047393 | 0.0001176  | 0          | 0          | 0.00043801 | 0.00015867 | 0          | 0          | 0.000112   |
| 0          | 0          | 0          | 0          | 0.00012225 | 0.00032863 | 0          | 0.00068532 | 0.00046864 | 0          | 0          | 5.49E-05   |
| 0          | 0          | 0          | 0          | 5.42E-05   | 0          | 0          | 0          | 0          | 0          | 0          | 0          |
| 0.00167233 | 0.0042474  | 0.00392625 | 0.03255176 | 0.00038531 | 0.00385266 | 0.00084758 | 0.00019368 | 0.00205537 | 0          | 0          | 0          |
| 0          | 0          | 0          | 0          | 0.00010832 | 0.00085304 | 0.00038424 | 0.00015792 | 0.00029521 | 0          | 0          | 0          |
| 0          | 0.00135661 | 0          | 0          | 0.00010677 | 0.00012586 | 0          | 0          | 0          | 6.31E-05   | 0          | 0.00082133 |
| 0.00147401 | 0          | 0.00904746 | 0.00097281 | 0.00044566 | 0          | 0          | 0          | 0          | 0.0006298  | 0.00917175 | 0.00779167 |
| 0.00520995 | 0          | 0.05104131 | 0.0081317  | 0.00014855 | 0.00437008 | 0          | 0          | 0          | 0.00215421 | 0.02639415 | 0.00440313 |
| 0.00757373 | 0          | 0.24530557 | 0          | 0.05914439 | 0.00211162 | 0          | 0          | 0          | 0.01553916 | 0.01742531 | 0.03851695 |
| 0          | 0          | 0          | 0          | 0          | 0          | 0          | 0          | 0          | 0.00138034 | 0.0004667  | 0.00091137 |
| 0.0036877  | 0          | 0          | 0          | 0          | 0          | 0          | 0          | 0          | 0.00615392 | 0.00316547 | 0.0085054  |
| 0          | 0          | 0          | 0          | 0          | 0          | 0          | 0          | 0          | 0.00307353 | 0.0020748  | 0.00060172 |
| 0          | 0          | 0          | 0          | 6.81E-05   | 0.0001818  | 0          | 0          | 0          | 0.00230515 | 0.01058708 | 0.00065004 |
| 0.00026264 | 0          | 0.00580403 | 0          | 2.63E-05   | 0.00085304 | 0          | 6.26E-05   | 0          | 0.00063254 | 0.00129866 | 0.00243984 |
| 0.00286226 | 0          | 0          | 0          | 0.00166968 | 0.03027591 | 0          | 0          | 0          | 0.0024698  | 0.00397206 | 0.00774775 |
| 0.00048776 | 0          | 0.00836463 | 0          | 0.00167742 | 0.00523011 | 0          | 0          | 0          | 0.00396266 | 0.00133417 | 0.00608093 |
| 0          | 0          | 0          | 0          | 0          | 0          | 0          | 0          | 0          | 0.00230789 | 0.02100676 | 0.00096408 |
| 0          | 0          | 0          | 0          | 0          | 0          | 0          | 0          | 0          | 0.00061745 | 0.00089283 | 0.00087404 |
| 0          | 0          | 0          | 0          | 0          | 0          | 0          | 6.85E-05   | 0          | 0.00040889 | 0.03323746 | 0.00013835 |
| 0          | 0          | 0.03516559 | 0          | 0          | 0          | 0          | 0          | 0          | 0.01688108 | 0.04195772 | 0.02651101 |
| 0          | 0          | 0          | 0          | 0          | 0          | 0          | 0          | 0          | 0.00037047 | 0.00092834 | 0.00191937 |
| 0.27105689 | 0.31585601 | 0          | 0.0006236  | 0.31644363 | 0.38311961 | 0          | 0          | 0.00111071 | 0.18050807 | 0.58375058 | 0.28144888 |
| 0.00163481 | 0.00016336 | 0          | 0          | 0.014012   | 0.00942539 | 0          | 0          | 0          | 0.00909024 | 0.01252492 | 0.10157502 |
| 0.0134376  | 0.00171885 | 0          | 0          | 0.00536959 | 0.00079011 | 0          | 0          | 0          | 0.00787455 | 0.01377285 | 0.03073626 |
| 0.00117385 | 0.00036224 | 0          | 0          | 5.26E-05   | 0.00065726 | 0          | 0          | 0          | 0.00050494 | 0.01213938 | 0.00182713 |
| 0.00344114 | 0.00347321 | 0          | 0          | 0.0024697  | 0.00554476 | 0          | 0          | 0          | 0.00538142 | 0.0238425  | 0.02229455 |
| 0.0007504  | 0          | 0          | 0          | 0.00028627 | 0.00707603 | 0          | 0          | 0          | 0.00454032 | 0.00479386 | 0.01024908 |
| 0          | 0.00039775 | 0          | 0.00049888 | 0          | 0.00015383 | 0          | 0          | 0.0002214  | 0          | 0.00045149 | 0.00018008 |
| 0.02033597 | 0.00073158 | 0          | 0          | 9.59E-05   | 0.00014683 | 0          | 0          | 0.00028044 | 0.00924528 | 0.00529101 | 0.00300203 |
| 0.04982687 | 0          | 0          | 0          | 0          | 0          | 0          | 0          | 0          | 0          | 0.02439544 | 0          |
| 0          | 0          | 0          | 0          | 0          | 0          | 0          | 0          | 0          | 0          | 0.00091312 | 0          |
| 0.02296774 | 0.00049719 | 0          | 0          | 0.01094963 | 0.06243969 | 0          | 0.10234529 | 0.01115137 | 0.01068326 | 0.05336154 | 0.06968144 |
| 0          | 0          | 0          | 0          | 0.00037912 | 0.00102784 | 0          | 0.0002056  | 0          | 0.00065038 | 0.00130373 | 0.00406054 |
| 0.00594428 | 0.00013495 | 0          | 0.00054877 | 0.01932742 | 0.00037058 | 0          | 0.01019043 | 0          | 0.00268659 | 0.00620412 | 0.00079937 |
| 0          | 0          | 0          | 0          | 0          | 0          | 0          | 0          | 0          | 0.00014819 | 0.00047178 | 0          |
| 0.01798827 | 0          | 0          | 0          | 0          | 0.00109776 | 0          | 8.05E-05   | 0          | 0.00510837 | 0.00325171 | 0.00103655 |
| 0.00210113 | 0.00126428 | 0          | 0          | 0          | 0.00533499 | 0          | 0          | 0          | 0.00137486 | 0.00624471 | 0.00147576 |
| 0          | 0          | 0          | 0          | 0          | 0          | 0          | 0          | 0          | 6.45E-05   | 0          | 0.00068737 |
| 0.0088923  | 0.00100148 | 0          | 0          | 0          | 0.01392832 | 0          | 0          | 0          | 0.00469536 | 0.00694983 | 0.02287211 |
| 0          | 0          | 0          | 0          | 0          | 0          | 0          | 0          | 0          | 0.00020582 | 0          | 0.00070274 |
| 0.0024549  | 0.02681971 | 0          | 0.00054877 | 0          | 0.00315345 | 0          | 0.20222938 | 0          | 0.00434822 | 0.00437789 | 0.00512783 |
| 0.0002412  | 0.00046878 | 0          | 0          | 0          | 0.0016851  | 0          | 0.00206788 | 0          | 0.00242178 | 0.00170956 | 0.00338415 |
| 0.01865292 | 0.35446616 | 0.01946057 | 0.28428536 | 0.11737271 | 0.01018753 | 0.62063286 | 0.00052144 | 0.38808035 | 0.02378829 | 0.01200749 | 0.02873563 |
| 0          | 0.00724473 | 0.00375555 | 0.0034672  | 0.00121938 | 0          | 0.02121769 | 0.00099223 | 0.06628093 | 0.00053924 | 0.00045149 | 0.00018008 |
| 0          | 0.04581936 | 0          | 0.00037416 | 0.07452587 | 0.05539163 | 0.04263597 | 0.65182102 | 0          | 0          | 0.02104735 | 0.01412735 |
| 0.00425587 | 0.00257117 | 0          | 0          | 0.00247744 | 0.00376176 | 0.00124029 | 0          | 0.01715511 | 0.00108946 | 0          | 0.00012518 |
| 0.21617551 | 0.0504219  | 0.01109594 | 0.06724869 | 0.141149   | 0.13362654 | 0.09811838 | 0.00846819 | 0.01264585 | 0.45353346 | 0.00181102 | 0.01072123 |
| 0.18435299 | 0.16157168 | 0.02372823 | 0.02222499 | 0.15885781 | 0.14879246 | 0.14088148 | 0.00504456 | 0.04450955 | 0.15348708 | 0.00378436 | 0.01186319 |
| 0          | 0.00149156 | 0          | 0          | 0.00016867 | 0          | 0          | 0          | 0.01175654 | 0          | 0          | 0          |
| 0.00375738 | 0.01263566 | 0          | 0.00042405 | 0.00606284 | 0.00395055 | 0.01221641 | 7.45E-05   | 0.00328047 | 0.0135496  | 0.000487   | 0.00063467 |
| 0.00178489 | 0.00388516 | 0          | 0          | 0.00017022 | 0.0001818  | 0.00100297 | 0          | 0.00083764 | 0          | 0          | 7.69E-05   |
| 0.0069734  | 0          | 0          | 0          | 0          | 0          | 0          | 0.001758   | 0.00517347 | 0          | 0.00434745 | 0          |
| 0.0737755  | 0.00014205 | 0.15790372 | 0.37241207 | 0.00603808 | 0.0052371  | 0.01496257 | 0.00428177 | 0.05367936 | 0.03551023 | 0.0038706  | 0.18165268 |
| 0.02980179 | 0.00021308 | 0.06947764 | 0.08089299 | 0.00235364 | 0.00137046 | 0.0055036  | 0.00137064 | 0.0227271  | 0.00788141 | 0.00043627 | 0.07667593 |
| 0          | 0          | 0          | 0          | 0.00028009 | 0          | 0.00012149 | 0          | 0.01619569 | 0          | 0.00089283 | 0.00046996 |
| 0.00087905 | 0          | 0.00341413 | 0.00498878 | 0.0001176  | 0.0004405  | 0.00060743 | 6.26E-05   | 0.07450977 | 0.00100164 | 0.0014204  | 0.00204235 |
| 0.00050384 | 0          | 0          | 0          | 7.12E-05   | 0          | 0.00012714 | 0.00201723 | 0.14573908 | 0.00014682 | 0.0004667  | 0.00046776 |
| 0          | 0          | 0          | 0          | 0.01848098 | 0.01149506 | 0.01318548 | 0.00366796 | 0.01113292 | 0.00012349 | 0.00181102 | 0.00054902 |
| 0          | 0          | 0.01707067 | 0          | 0.01562751 | 0          | 0.00677779 | 0.00053336 | 0.09807083 | 0          | 0.0056664  | 0.00091137 |
| 0          | 0          | 0          | 0          | 0.00206273 | 0          | 0.00225456 | 0          | 0.01149824 | 0          | 0.00044641 | 0          |
| 0          | 0          | 0.1597815  | 0.0010227  | 0.00058957 | 0          | 0.00013844 | 0          | 0          | 0.00032107 | 0          | 0          |
| 0          | 0          | 0.00392625 | 0.02738838 | 0          | 0          | 0          | 0          | 0          | 0          | 0          | 0          |
| 0          | 0          | 0          | 0.00793215 | 0.00015474 | 0          | 0          | 0          | 0          | 0          | 0          | 0          |
| 0.00933718 | 0          | 0          | 0.06148666 | 0.01345028 | 0.01236907 | 0          | 0          | 0.00011439 | 0          | 0          | 0          |
| 0.00093265 | 0          | 0          | 0.01810925 | 0.00135246 | 0.00012586 | 0.01607572 | 0          | 0.00047602 | 0.00020033 | 0          | 0          |
| 0.00088441 | 0          | 0.16165927 | 0          | 0.00329758 | 0.05445468 | 0.00048594 | 0          | 0          | 0.00034577 | 0.00046163 | 0          |
| 0          | 0          | 0          | 0.00124719 | 0.00017486 | 0.01309625 | 0          | 0          | 0          | 0          | 0.00092834 | 0.00032063 |
| 0          | 0.00012785 | 0          | 0.00049888 | 0.00031258 | 0          | 0          | 0          | 0          | 0          | 0          | 0.00013616 |

| HC48       | HC47       | HC46       | HC45       | HC41       | HC43       | HC42       | HC52       | HC40       | HC39       | HC38       | HC44       |
|------------|------------|------------|------------|------------|------------|------------|------------|------------|------------|------------|------------|
|            | 0          | 0.00159315 | 0          | 0          | 0          | 0          | 0          | 0          | 0          | 0          | 0.00011588 |
|            | 0          | 0          | 0          | 0          | 0          | 0          | 0          | 0          | 0          | 0          | 0          |
|            | 0          | 0          | 0          | 0          | 0          | 0          | 0          | 0          | 0          | 0          | 0          |
|            | 0          | 0          | 0          | 0          | 0          | 0          | 0          | 0          | 0          | 0          | 0          |
|            | 0          | 0          | 0          | 0          | 0          | 0          | 0          | 0          | 0          | 0          | 0          |
|            | 0          | 0          | 2.36E-05   | 0          | 0          | 0          | 0          | 0          | 0          | 0          | 0          |
|            | 0          | 0          | 2.95E-05   | 0          | 0          | 0          | 0          | 0          | 0          | 0          | 6.32E-05   |
|            | 0          | 0          | 7.52E-05   | 0          | 5.33E-05   | 0          | 0          | 0          | 0          | 0.00010971 | 0          |
| 0.00012678 | 0.00047171 | 0.00258283 | 0          | 0.00013985 | 0          | 0.00286033 | 9.97E-05   | 0          | 0          | 0          | 0.00021069 |
| 5.80E-05   | 0.00060522 | 0.00390596 | 0.00017764 | 0.00014651 | 0          | 0          | 3.90E-05   | 0          | 7.46E-05   | 0          | 3.76E-05   |
| 8.59E-05   | 0          | 0.00047497 | 0          | 5.99E-05   | 0          | 0          | 7.15E-05   | 0          | 0          | 0          | 9.78E-05   |
| 8.17E-05   | 0.00239418 | 0          | 0          | 7.33E-05   | 0          | 0          | 0          | 0          | 0          | 0          | 0          |
| 4.08E-05   | 0          | 0.00010178 | 0.00015001 | 0          | 0          | 0          | 0          | 0          | 0          | 0          | 0.00015953 |
| 0.00013752 | 0.00595429 | 0.008517   | 0.00074609 | 0.00071255 | 0.00029206 | 0.01018083 | 0.00041178 | 0.00058687 | 0.00013122 | 0          | 0.00066669 |
| 0.00851331 | 0          | 0.02187958 | 0.00430681 | 0.01005336 | 0.00080522 | 0.00940515 | 0.00368647 | 0.00409158 | 0          | 0.01035447 | 0.14576837 |
| 0.01347905 | 0.01206878 | 0.00992126 | 0.01068609 | 0.00296118 | 0.00417621 | 0.08406458 | 0.00780205 | 0.00210943 | 0.00410369 | 0.00981017 | 0.00046804 |
| 0.02611364 | 0.00064082 | 0.29403279 | 0.00238039 | 0.00677254 | 0.04612118 | 0.01924662 | 0.10043843 | 0.0104175  | 0.00060205 | 0.0423968  | 0.00774299 |
| 0.023793   | 0          | 0.00642832 | 0.00938734 | 0.01535863 | 0.00970081 | 0.02593688 | 0.00447968 | 0.01294881 | 0.01115328 | 0.011076   | 0.00552619 |
| 0.3183208  | 0          | 0.03254722 | 0.00061187 | 0.01255505 | 0.0171117  | 0.0056237  | 0.01043091 | 0.01701682 | 0.06023542 | 0.02288617 | 0.10699172 |
| 0.00619052 | 0.00032931 | 0.00607578 | 0.04785252 | 0.00091011 | 0.01088544 | 0.17244388 | 0.00043345 | 0          | 0.00059947 | 0.00824898 | 0.00752327 |
| 0.00035669 | 0          | 0.00021683 | 0.00050134 | 0.00067037 | 0.01520631 | 0.00150288 | 0.00032292 | 0.00149192 | 0.00695697 | 0.00158229 | 0.00019263 |
| 0.00026    | 0.00175336 | 0.00080686 | 0.00077372 | 0.00010211 | 0.00042581 | 0          | 0.00116381 | 0.00031111 | 0.00224095 | 0.00213081 | 0.00078709 |
| 0.00215304 | 0.00034711 | 0.00630146 | 0.00120796 | 0.00134074 | 0.00266131 | 0.00155136 | 0.00436698 | 0.00089091 | 0.01197401 | 0.01210554 | 0.00246361 |
| 0.00022347 | 0.00052512 | 0.00174795 | 0.00056845 | 0.01517217 | 0.01285617 | 0.00363601 | 0.00132201 | 0.00183603 | 0.01269698 | 0.01763299 | 0.00166147 |
| 0.00038462 | 0.00214497 | 0.00194118 | 0.02885678 | 0.00263709 | 0.01131125 | 0          | 0.00220191 | 0.00233097 | 0.00013122 | 0.00133334 | 0.0005177  |
| 0          | 0.04203603 | 0.00511699 | 0.00158693 | 0.00610438 | 0.00409705 | 0.00140592 | 0.00389019 | 0.00061044 | 0.00335242 | 0.01347685 | 0.0029151  |
| 8.17E-05   | 0.00224287 | 0.0001121  | 0          | 0.00739407 | 0          | 0          | 0.00013003 | 0          | 0.00024185 | 0          | 0.00029949 |
| 0.04992812 | 0.05486133 | 0.03291156 | 0.05930049 | 0.01072818 | 0.00194344 | 0.06312115 | 0.041793   | 0.00566128 | 0.04667396 | 0.01550639 | 0.02671143 |
| 0.00141172 | 0.00032931 | 0.00167419 | 0.00018554 | 0.00086349 | 0          | 0          | 0.00164277 | 0.00089562 | 0.0013739  | 0.00192406 | 0.00241244 |
| 0.28819117 | 0.10541493 | 0.32125062 | 0.04519975 | 0.43879857 | 0.55734917 | 0.29311097 | 0.44707065 | 0.81442706 | 0.21730495 | 0.57187583 | 0.50828628 |
| 0          | 0.00058742 | 0.01951358 | 0.00615032 | 0.06309046 | 0.04856412 | 0.03102729 | 0.03689721 | 0.014568   | 0.02545314 | 0.0296035  | 0.02636078 |
| 0.00034165 | 0.00165545 | 0.00982538 | 0.00642271 | 0.03093701 | 0.02443492 | 0.01531973 | 0.01106374 | 0.00766228 | 0.01504856 | 0.01942202 | 0.01323306 |
| 0          | 0.00157535 | 0.00021831 | 0.00096321 | 0.00046615 | 0.00452286 | 0.0014544  | 0.00053531 | 0.00209528 | 0.00081045 | 0.00401689 | 0.00198955 |
| 0.00667184 | 0.00269679 | 0.01583331 | 0.00205669 | 0.03620676 | 0.0231957  | 0.00290881 | 0.01586417 | 0.02230571 | 0.01851418 | 0.03544741 | 0.01984433 |
| 0.00303402 | 0.00023141 | 0.00691509 | 0.00016185 | 0.00318316 | 0.00771916 | 0.00179377 | 0.00407224 | 0.0047138  | 0.01056924 | 0.02130389 | 0.00895598 |
| 0          | 0          | 0.00048677 | 0.00099479 | 0.00047725 | 0.00065236 | 0          | 0.00014954 | 0.0005798  | 0.0003036  | 0.00040085 | 0.00013093 |
| 0          | 0.00032931 | 0.00097354 | 0          | 0.05727465 | 0.05246738 | 0          | 0.00109662 | 0.0480195  | 0.0014305  | 0.00745573 | 0.00065165 |
| 0          | 0.0284008  | 0          | 0          | 0.00144951 | 0.00093078 | 0          | 0.00045729 | 0.00241111 | 0          | 0.00405487 | 0.00089846 |
| 7.09E-05   | 0          | 0          | 0.00058424 | 8.21E-05   | 0          | 0.00193921 | 0.00200469 | 0          | 0          | 0          | 4.21E-05   |
| 0.01455771 | 0.08706255 | 0.02290917 | 0.01617322 | 0.03335213 | 0.01493609 | 0.07315654 | 0.07173121 | 0.00503198 | 0.07008169 | 0.03968371 | 0.02193621 |
| 0.00149123 | 0.00030261 | 0.00110335 | 0.00093558 | 0.0017958  | 0.00094715 | 0.00184225 | 0.0032747  | 0.00121145 | 0.00272979 | 0.00202111 | 0.00144927 |
| 0.00023851 | 0.01604721 | 0.00120512 | 0.00092768 | 0.00038402 | 0.00021836 | 0          | 0.00875564 | 0.00027104 | 0.00043224 | 0.00078481 | 4.51E-05   |
| 0          | 0.00448574 | 0          | 0.00033949 | 0          | 0          | 0          | 0.00028608 | 0          | 7.46E-05   | 0.00063291 | 0          |
| 3.87E-05   | 0.01707964 | 0.00142343 | 0.00127901 | 0.02866396 | 0          | 0.01139283 | 0.00399422 | 0.00111953 | 0.00676658 | 0.0043882  | 0.00080816 |
| 0          | 0.01347503 | 0.00214326 | 0.00940707 | 0.00083242 | 0.00032482 | 0.00218161 | 0.00092541 | 0.00111953 | 0.00079244 | 0.00432913 | 0.00086535 |
| 0.04118275 | 0          | 0          | 0.01204011 | 0.00143841 | 0.00048313 | 0.0075629  | 0.00162759 | 0          | 0.00133788 | 0          | 0.00147185 |
| 0.1724235  | 0.00073872 | 0          | 0.48085426 | 0.00914104 | 0.00280598 | 0.10321423 | 0.05233877 | 0.00091448 | 0.00901782 | 0.0023882  | 0.00617483 |
| 0.01254005 | 0          | 9.88E-05   | 0.02006553 | 0.00048613 | 0.00022109 | 0.00460561 | 0.00485244 | 0          | 0.00085418 | 0.00158229 | 0.00052071 |
| 5.59E-05   | 0.02153868 | 0.00613478 | 0.09666643 | 0.00190235 | 0.00388415 | 0.01119891 | 0.0226693  | 0.00456767 | 0.00941661 | 0.00356542 | 0.00780469 |
| 0          | 0.01557549 | 0.0018748  | 0.01250592 | 0.00514766 | 0.00330275 | 0.01308964 | 0.00909806 | 0.0057367  | 0.00815334 | 0.00593251 | 0.00244856 |
| 0.00340575 | 0.01321692 | 0.06129027 | 0.00361203 | 0.01048178 | 0.00509607 | 0          | 0.00160159 | 0.00031347 | 0.02842478 | 0.02908873 | 0.01143765 |
| 0.00352823 | 0          | 0.00048234 | 0          | 0          | 0.00064963 | 0          | 0.00017121 | 0          | 7.46E-05   | 0.00021941 | 0          |
| 0          | 0          | 0          | 0.05288963 | 0.01397571 | 0.0001201  | 0.00416929 | 0.00782589 | 0          | 0          | 0.00589032 | 0.00145981 |
| 0          | 0.00024921 | 0.00015931 | 0.00052503 | 0.00130523 | 0.00131564 | 0          | 3.90E-05   | 0          | 0.00710105 | 0          | 0.00065165 |
| 0          | 0.05801203 | 0.06095543 | 0.04083768 | 0.03170727 | 0.05709123 | 0.00130896 | 0.03779878 | 0.00027104 | 0.23430372 | 0.01562032 | 0.03142495 |
| 5.80E-05   | 0.01985653 | 0.02298588 | 0.01065846 | 0.01622878 | 0.02215574 | 0.0065933  | 0.01132381 | 0.00029697 | 0.08233871 | 0.00862029 | 0.00941499 |
| 0          | 0          | 0.00038352 | 0          | 0.00065705 | 0.00020199 | 0          | 0          | 0          | 0.0021509  | 0          | 0.00031454 |
| 0          | 0.00158425 | 0.00158274 | 0.00230538 | 0.00166483 | 0.00351293 | 0          | 0.00456637 | 0          | 0.01458545 | 0.00031224 | 0.00118289 |
| 0          | 0          | 0.00015783 | 0.00029212 | 0.00016648 | 0.00073698 | 0          | 0.00066101 | 0          | 0.0005017  | 0.00025739 | 0.00022725 |
| 0          | 0          | 0          | 0          | 0          | 0.00010099 | 0          | 0          | 0          | 0          | 0          | 4.36E-05   |
| 0          | 0.34043576 | 0.00086439 | 0.00351334 | 0.07751234 | 0.01370233 | 0.00606002 | 0.03020478 | 0.00055859 | 0.03169229 | 0.00537133 | 0.00313632 |
| 0          | 0.05595607 | 0.00035254 | 0.00018159 | 0.02884598 | 0.00322906 | 0.00329665 | 0.01093588 | 0.0003064  | 0.01673635 | 0.00056118 | 0.00171715 |
| 0          | 0.00406743 | 0          | 0          | 0.00025527 | 0.00029479 | 0          | 0.00041828 | 0          | 0.00068438 | 0          | 0          |
| 0          | 0.00377372 | 3.98E-05   | 0.00017369 | 0.00177804 | 0.00141937 | 0          | 6.07E-05   | 0          | 0.00793208 | 0          | 0.00044547 |
| 0          | 0.00053402 | 0          | 0.00065925 | 0.0007525  | 0.00167321 | 0          | 0.00016688 | 0          | 0.00213803 | 0          | 5.87E-05   |
| 0.00019768 | 0.00461925 | 0.0006682  | 0.00081715 | 0.00345397 | 0.00084616 | 0          | 0.00038143 | 0          | 0.00289445 | 0.00014768 | 0.0002137  |
| 4.51E-05   | 0.02818719 | 0.00063723 | 0.00035528 | 0.00084573 | 0.00128289 | 0          | 0.00640419 | 0.00029933 | 0.00420403 | 0.00389031 | 0.0057489  |
| 0          | 0.00137064 | 7.23E-05   | 0.00017369 | 7.55E-05   | 0.00022928 | 0          | 0.00010403 | 0          | 0.00099569 | 0.00039241 | 0.00010685 |
| 0.00018694 | 0          | 0          | 0          | 0          | 0          | 0          | 0.0006285  | 0          | 0          | 0          | 0          |
| 0          | 0          | 0          | 0          | 0          | 0          | 0          | 0          | 0          | 0          | 0          | 0          |
| 0          | 0.00258108 | 0          | 0          | 0          | 0          | 0          | 0.00136969 | 0          | 0.00059433 | 0          | 9.48E-05   |
| 0          | 0.01551319 | 0          | 0          | 0.00022864 | 0.00078338 | 0          | 0.00026657 | 0          | 0.00053515 | 0          | 0          |
| 0          | 0.00026701 | 0          | 0          | 7.77E-05   | 0          | 0          | 0.00026657 | 0          | 0          | 0          | 0          |
| 0          | 0.00106803 | 3.39E-05   | 0          | 6.88E-05   | 0.00077519 | 0.00179377 | 0          | 0          | 0.00025214 | 0.00016456 | 5.27E-05   |
| 0          | 0.00292819 | 0          | 0          | 0          | 0.00022382 | 0          | 0.00121149 | 0          | 0.00022641 | 0          | 0.00019113 |
| 0          | 0.00028481 | 0          | 0          | 0          | 0          | 0          | 0.00010186 | 0          | 0          | 0          | 0          |

| HC53       | HC57       | HC55       | HC70       | HC69       | HC68       | HC67       | HC66       | HC65       | HC64       | HC63       | HC62       |
|------------|------------|------------|------------|------------|------------|------------|------------|------------|------------|------------|------------|
| 0          | 5.12E-05   | 0          | 0          | 0          | 0.00021398 | 0          | 0.00026571 | 0          | 0.00014272 | 0          | 0          |
| 0          | 0          | 0          | 0          | 0          | 0          | 0          | 0          | 0          | 0          | 0          | 0          |
| 0          | 0          | 0          | 0          | 0          | 0          | 0          | 0          | 0          | 0          | 0          | 0          |
| 0          | 0          | 0          | 0          | 0          | 0          | 0          | 0          | 0          | 0          | 0          | 0          |
| 0          | 0          | 0          | 0          | 0          | 0          | 0          | 0          | 0          | 0          | 0          | 0          |
| 0          | 0          | 0          | 0          | 0          | 0          | 0          | 0          | 0          | 0          | 0          | 0          |
| 0          | 0          | 0          | 0          | 0          | 0.00010282 | 0          | 0          | 0          | 0.00013107 | 0          | 0          |
| 0          | 0          | 0          | 0          | 0          | 0          | 0          | 0          | 0          | 0.00025631 | 0          | 0          |
| 0          | 0          | 0          | 0          | 0          | 0          | 0          | 0          | 0.00010326 | 0          | 0          | 0          |
| 0          | 0.00046073 | 4.25E-05   | 0.00028205 | 0          | 0.00023621 | 0.00061791 | 0.00048713 | 0.00013079 | 0          | 0          | 0          |
| 0          | 4.80E-05   | 4.25E-05   | 0          | 0          | 8.06E-05   | 0          | 0          | 0          | 0.00037865 | 0          | 0.00016261 |
| 0          | 0          | 0          | 0.0002701  | 0          | 0          | 0          | 0          | 0          | 0.00012233 | 0          | 0          |
| 0          | 4.64E-05   | 0          | 0.00058562 | 7.02E-05   | 0          | 0          | 0.00047384 | 0          | 0          | 0          | 0.00015769 |
| 3.59E-05   | 0          | 0          | 0          | 0          | 0.00042239 | 0          | 0.00031885 | 0          | 0          | 0          | 0          |
| 0          | 0.00012638 | 0.00058892 | 0.0004183  | 0.00052277 | 0.0005141  | 0.00401913 | 0.00089897 | 0.00111863 | 0.00104564 | 0.00040398 | 0          |
| 0.00099555 | 0.00071509 | 0.0005238  | 0          | 0          | 0.01864089 | 0.02051475 | 0.04391244 | 0.00108765 | 0.04073352 | 0.00088875 | 0.01312742 |
| 0.00777724 | 0.00191811 | 0          | 9.56E-05   | 0.00070834 | 0.01842136 | 0.01171735 | 0.07604522 | 0.00074346 | 0.04216655 | 0.00031536 | 0.03092138 |
| 0.04821139 | 0          | 0.02543673 | 0.01678702 | 0.05613528 | 0.01002629 | 0.06220515 | 0.00281206 | 0.01032922 | 0.0976323  | 0.06226217 | 0.03739639 |
| 0.00327857 | 0.07625709 | 0.00582406 | 0.04373995 | 0.00439487 | 0.01104893 | 0.01191231 | 0.00126211 | 0.00673241 | 0.02033035 | 0.02713952 | 0.01977749 |
| 0          | 0.00012798 | 0          | 8.84E-05   | 0.00014031 | 0.02467945 | 0.04481758 | 0.0063371  | 0.00034419 | 0.25937803 | 0.0388601  | 0.04852317 |
| 0.00066619 | 0.01398825 | 0          | 0          | 0.00795467 | 0.01144631 | 0.02920853 | 0.0020548  | 0.00046122 | 0.05213949 | 0.00854349 | 0.02632383 |
| 0.00033834 | 0          | 0.00057618 | 0          | 0.00057708 | 0.00096428 | 0.0012412  | 0.00152781 | 0.00093276 | 0.00015728 | 0.00171495 | 0.00143396 |
| 0.00149107 | 0          | 0.00162377 | 0          | 0.00172898 | 0.00252047 | 0.00462092 | 0.00034542 | 0.00050252 | 0          | 0.00097476 | 0.00226675 |
| 0.00659306 | 0          | 0.01638778 | 0          | 0.01021547 | 0.01094888 | 0.01560368 | 0.00017271 | 0.00188962 | 0.00959721 | 0.01148601 | 0.00353317 |
| 0.00058385 | 0          | 0.00280302 | 0          | 0.0062189  | 0.02505738 | 0.02958465 | 0          | 0.00154198 | 0.00185828 | 0.00280178 | 0.00555846 |
| 0.00168569 | 0          | 0.00171862 | 0.00070753 | 0.00320902 | 0.00135888 | 0.00251464 | 0.00137282 | 0          | 0          | 0.00860604 | 0.00322272 |
| 0.00058236 | 0          | 0.01044905 | 7.17E-05   | 0.0049629  | 0.00551613 | 0.01157917 | 0          | 0.01584319 | 0.00040195 | 0.02832539 | 0.00033016 |
| 3.89E-05   | 0          | 8.64E-05   | 0          | 0.00089391 | 7.78E-05   | 0.00109075 | 0          | 0.00021684 | 0.0003     | 7.04E-05   | 0.00166064 |
| 0.02682136 | 0.00010718 | 0.03805176 | 0.00010756 | 0.24264787 | 0.10746581 | 0.14861104 | 0.07448641 | 0.03880427 | 0.02175464 | 0.0806888  | 0.02936423 |
| 0.00339384 | 0          | 0.00166199 | 0          | 0.00283109 | 0.00377931 | 0.00534093 | 0.00095212 | 0.00116337 | 0.00075729 | 0.00519699 | 0.00059625 |
| 0.39897302 | 0.2168243  | 0.16650103 | 0.07658733 | 0.03678835 | 0.31458592 | 0.37643867 | 0.10632249 | 0.34700811 | 0.18119646 | 0.38574191 | 0.23853568 |
| 0.08713051 | 0.00219006 | 0.02452646 | 0          | 0.01356254 | 0.02683588 | 0.0111332  | 0.00326376 | 0.01344761 | 0.02889066 | 0.11094025 | 0.00660313 |
| 0.05997081 | 0.00291635 | 0.03164019 | 0.00220863 | 0.004938   | 0.0153201  | 0.01344904 | 0.00691723 | 0.01171287 | 0.03641988 | 0.03396024 | 0.00737185 |
| 0.00139526 | 7.68E-05   | 0.00275631 | 0          | 0.00070381 | 0.00246489 | 0.00532481 | 0          | 0.00095686 | 0.00059127 | 0.00117545 | 0.00118758 |
| 0.0282286  | 0.00346027 | 0.01893457 | 0.00220624 | 0.00606727 | 0.01754878 | 0.02275536 | 0.00139496 | 0.01515824 | 0.01178753 | 0.0213509  | 0.01746381 |
| 0.01665182 | 0          | 0.00566975 | 8.61E-05   | 0.00031457 | 0.01038199 | 0.0076299  | 0          | 0.00090523 | 0.00225731 | 0.00339081 | 0.00337548 |
| 0.00014671 | 0          | 0.00032136 | 0.00017449 | 0.00022857 | 0.00047241 | 0.00029552 | 0.00015942 | 0.00019963 | 0.0004835  | 0.00017723 | 0.00045828 |
| 3.89E-05   | 0          | 0          | 0          | 0.00791393 | 0.00013895 | 0.00090807 | 0.00626625 | 0.00355895 | 0.00049515 | 0.02127271 | 0.02692008 |
| 0.00048505 | 0          | 3.96E-05   | 0          | 0.00117227 | 0.00058357 | 0.0063672  | 0.01951615 | 0          | 0          | 0          | 0.00556831 |
| 0          | 0          | 2.12E-05   | 0.00141027 | 0          | 0          | 0.00034926 | 0.00293606 | 0.00048531 | 0          | 0          | 0          |
| 0.01740335 | 0.03248141 | 0.09787791 | 0.03627746 | 0.09552615 | 0.10655432 | 0.06190962 | 0.04946571 | 0.06142117 | 0.0459967  | 0.08965972 | 0.03292696 |
| 0.00107339 | 0.00145098 | 0.0046802  | 0.00072904 | 0.00278583 | 0.00336525 | 0.00029015 | 0.00069084 | 0.00155919 | 0.00107186 | 0.00376612 | 0.00016754 |
| 0.00261537 | 0.00051352 | 0.00214211 | 0.00212019 | 0.00436092 | 0.00287617 | 0.00164419 | 0.02665037 | 0.06040925 | 0.00053302 | 0.00483471 | 0.00184296 |
| 0.00018414 | 0          | 0          | 0.00012669 | 0.00015615 | 0          | 0          | 0.01179294 | 0.00046122 | 0.00044855 | 0          | 0.00068495 |
| 0.00411692 | 0.00203809 | 0.00186444 | 9.56E-05   | 0.00244863 | 0.02983154 | 0.02105744 | 0.00027456 | 0          | 0.01305162 | 0.00013813 | 0.0053712  |
| 0.00087428 | 0          | 0.00082533 | 9.80E-05   | 0.0018195  | 0.00459075 | 0.00546451 | 0.00269692 | 0.00349355 | 0.00107768 | 0.0018583  | 0.00651936 |
| 3.44E-05   | 0          | 0.00078994 | 0          | 0.00187834 | 0.00234817 | 0          | 0.00033213 | 0.00026847 | 0.00014855 | 0.00351852 | 0.0021337  |
| 0.00668139 | 0          | 0.0303123  | 0.00201741 | 0.04037983 | 0.0433787  | 0.00188061 | 0.00360032 | 0.01603593 | 0          | 0.03098904 | 0.01131402 |
| 0.00044912 | 0.00235484 | 0.00229905 | 0.0019194  | 0.00199376 | 0.0023315  | 0.00090807 | 0          | 0.00066773 | 0          | 0.00216845 | 0.00066524 |
| 0.00211685 | 0.02118555 | 0.00820946 | 0.0092815  | 0.00588396 | 0.01102947 | 0.00342808 | 0.01084526 | 0.00772368 | 0.00475928 | 0.00317709 | 0.00970759 |
| 0.00167821 | 0.00036634 | 0.0016535  | 0.0009346  | 0.00520731 | 0.00654154 | 0.00627586 | 0.00533627 | 0.0040718  | 0.00072816 | 0.00332826 | 0.01859718 |
| 0.0216041  | 0.00221614 | 0.01288542 | 0.44129085 | 0.00822171 | 0.00992069 | 0.00175703 | 0.20701643 | 0.0822758  | 0.04028789 | 0          | 0.01814383 |
| 6.89E-05   | 0.00221086 | 0.00105184 | 0.02641033 | 0.00010863 | 0          | 0          | 0.00368889 | 0.01323421 | 0          | 0          | 0.0023653  |
| 0.00016468 | 0.03632722 | 0          | 0.04032661 | 0.00477054 | 0.00405442 | 0.00031702 | 0.05318117 | 0.03609892 | 0.0066263  | 0          | 0          |
| 0.00274112 | 0.00115502 | 0.02583878 | 0.00027488 | 0          | 0.00047797 | 0          | 0.00016828 | 0.00212367 | 0          | 0          | 0.00053712 |
| 0.11888619 | 0.37087583 | 0.30534273 | 0.00193136 | 0.01039651 | 0.09822873 | 0.02721509 | 0.02004756 | 0.02700879 | 0.03096738 | 0          | 0.01240305 |
| 0.04543733 | 0.10412481 | 0.10228064 | 0.0293982  | 0.00478185 | 0.02462943 | 0.01181022 | 0.03860717 | 0.01858296 | 0.01915073 | 0          | 0.00653907 |
| 0.00084734 | 0          | 0.007445   | 0.00033942 | 0          | 0          | 0          | 0.00120011 | 0.00287057 | 0.00045146 | 0          | 0          |
| 0.00540589 | 0.00440572 | 0.01222005 | 0.09042951 | 0.00226985 | 0.00019174 | 0.00115523 | 0.00149681 | 0.00109109 | 0.00101943 | 0          | 0.0010496  |
| 0.00037427 | 0          | 0.00052663 | 0.03022524 | 0.00142799 | 0          | 0          | 0.00112482 | 0.00046466 | 0          | 0          | 0.00018725 |
| 4.49E-05   | 0          | 0.00016563 | 0          | 0          | 0          | 0          | 0          | 0.00024438 | 0          | 0          | 0.00152759 |
| 0.05109622 | 0.04793504 | 0.00641015 | 0.0821352  | 0.22555496 | 0.00541331 | 0.00313256 | 0.11647248 | 0.10608705 | 0.01405066 | 0          | 0.20291819 |
| 0.01114862 | 0.02192463 | 0.003198   | 0.01219527 | 0.14515512 | 0.00129497 | 0.00060717 | 0.0358881  | 0.02277178 | 0.00474763 | 0          | 0.08789557 |
| 0.00082338 | 0.00092146 | 0.00038648 | 0.00217517 | 0.00132389 | 0          | 0          | 0.00088569 | 0.00231986 | 0.00015437 | 0          | 0.00178876 |
| 0.00184288 | 0.00012958 | 0.00924998 | 0.00838992 | 0.00417535 | 0.00023065 | 0          | 0.00243122 | 0.00968902 | 0.00013689 | 0          | 0.00360708 |
| 0.00022905 | 0.00060311 | 0.00129534 | 0.00669282 | 0.00179008 | 0          | 0          | 0.00064212 | 0.02235187 | 0          | 0          | 0.02143061 |
| 0.00064823 | 0          | 0.00125428 | 0.00676692 | 0.00370463 | 0.00020842 | 0.00096717 | 0.00122668 | 0.00988865 | 0.00015437 | 0          | 0.0018676  |
| 0.00381302 | 0.00430494 | 0.00289787 | 0.01405491 | 0.00264099 | 0.00054744 | 0          | 0.01658452 | 0.00846714 | 0.00222818 | 0          | 0.00873683 |
| 0.00150006 | 0.00238523 | 0.0013194  | 0.00579407 | 0.0001652  | 0.00010004 | 0          | 0.00097869 | 0.00080541 | 0          | 0          | 0.00015769 |
| 0          | 0          | 0          | 0          | 0          | 0          | 0          | 0          | 0          | 0          | 0          | 0          |
| 0          | 0          | 0          | 0          | 0          | 0          | 0          | 0          | 0          | 0          | 0          | 0          |
| 0          | 0          | 0          | 0.00174252 | 0.00534535 | 0          | 0          | 0.00946358 | 0          | 0.00064661 | 0          | 0.00232588 |
| 0          | 0          | 0          | 0          | 0          | 0          | 0          | 0.01368389 | 0          | 0          | 0          | 0.00196616 |
| 6.89E-05   | 0          | 0          | 0          | 7.24E-05   | 0          | 0          | 0.00247993 | 0.00075722 | 0          | 0          | 0.00115801 |
| 0.00017516 | 0.00050072 | 0          | 0          | 0.00045261 | 0          | 0.00033314 | 0.00038085 | 0.00067806 | 0.00015728 | 0.00027366 | 0.00074901 |
| 0.00031289 | 0          | 0          | 0          | 7.69E-05   | 0          | 0          | 0          | 0.00044401 | 0          | 0          | 0.00038929 |
| 2.55E-05   | 0.00032955 | 0          | 0          | 0.00022404 | 0          | 0          | 0.00016385 | 0.0002547  | 0          | 0          | 0.00048784 |

| HC61       | HC60       | HC59       | HC58       | HC37       | HC56       | HC54       | HC36       | HC09       | HC34       | HC14       | HC13       |
|------------|------------|------------|------------|------------|------------|------------|------------|------------|------------|------------|------------|
| 0          | 0          | 0          | 0          | 0          | 0          | 0          | 0          | 0          | 0          | 0          | 0          |
| 0          | 0          | 0          | 0          | 0          | 0          | 0          | 0          | 0          | 0          | 0          | 0          |
| 0          | 0          | 0          | 0          | 0          | 0          | 0          | 0          | 0          | 0          | 0          | 0          |
| 0          | 0          | 0          | 0          | 0          | 0          | 0          | 0          | 0          | 0          | 0          | 0          |
| 0          | 0          | 0          | 0          | 0          | 0          | 0          | 0          | 0          | 0          | 0          | 0          |
| 0          | 0          | 0          | 0          | 7.75E-05   | 0          | 0          | 0          | 0          | 0          | 0          | 0          |
| 0          | 0          | 0          | 0          | 0          | 0          | 0          | 0          | 0          | 0          | 4.69E-05   | 0          |
| 0          | 0          | 0          | 0.00024706 | 0          | 0          | 0          | 0          | 0          | 0          | 0          | 0          |
| 0.00021629 | 0.00051548 | 0.00113079 | 0.00098823 | 0          | 0          | 0.0001528  | 0          | 0          | 4.96E-05   | 0.00119792 | 0          |
| 0.00022327 | 0.00086939 | 0.00020507 | 0.00051834 | 0          | 6.95E-05   | 0.00031888 | 0.00022298 | 0          | 0          | 0          | 9.67E-05   |
| 0          | 0          | 0          | 0.00024706 | 0          | 0          | 0          | 0          | 0          | 4.27E-05   | 0          | 0          |
| 0          | 0          | 0          | 0          | 0.00167366 | 0          | 0          | 0          | 0          | 0.00021354 | 0.00074465 | 0.00011019 |
| 0.00022327 | 0          | 0          | 0          | 0          | 6.95E-05   | 0.00082377 | 0          | 0          | 0          | 0          | 0          |
| 0.00043956 | 0.00817074 | 0.02696321 | 0.00341522 | 0.00108238 | 0          | 0.0003521  | 9.06E-05   | 0.00098517 | 0          | 7.93E-05   | 0.00042726 |
| 0.00041863 | 0.04205776 | 0.00243149 | 0.0183356  | 0.0001357  | 0          | 0.00195314 | 0          | 0.00139209 | 0.00021905 | 0.00062    | 0          |
| 0.00301413 | 0.01439881 | 0.08098338 | 0.01297298 | 0.00170597 | 0          | 0.03701661 | 0.00181635 | 0.00391641 | 0.00128538 | 0.02062198 | 0.01327885 |
| 0.0083656  | 0.02009217 | 0.05762346 | 0.19878505 | 6.79E-05   | 0.00025184 | 0.03662466 | 0.00260607 | 0.02298872 | 0          | 0.01988542 | 0.00633472 |
| 0.01361242 | 0.00382378 | 0.00976699 | 0.00306159 | 0.03408702 | 0          | 0.00812479 | 0.0240794  | 0.01081973 | 0          | 0.00327323 | 0.0145359  |
| 0.05279609 | 0.01774558 | 0.00131242 | 0.02290376 | 0          | 0.00700162 | 0.01883383 | 0.0032541  | 0.07101074 | 0          | 7.12E-05   | 0.01250304 |
| 0.00609105 | 0.00344294 | 0.0130539  | 0.0055031  | 0          | 0.00453314 | 0.00961289 | 0.00014401 | 0.00811551 | 0.00158572 | 0.0125328  | 0.00332815 |
| 0.0038165  | 0          | 0.01678023 | 0.00075571 | 0.0006882  | 0.00097046 | 0.00118916 | 0.00055745 | 0.00013136 | 0          | 0          | 0.00167757 |
| 0.00117216 | 0.00047316 | 0.00069722 | 0.00022284 | 0.00021001 | 0.00033868 | 0.0036804  | 0.00092676 | 0.00072389 | 0          | 0          | 0.00402526 |
| 0.00743764 | 0.0059434  | 0.00556021 | 0.00500414 | 0.00235863 | 0.00244677 | 0.01392441 | 0.00367915 | 0.00131642 | 0          | 0.00011979 | 0.02905607 |
| 0.00668411 | 0.0027659  | 0.00517937 | 0.00046505 | 0.0015638  | 0.00382104 | 0.00557375 | 0.00109399 | 0.02754906 | 0          | 0.00074465 | 0.00388134 |
| 0          | 0          | 0.01030016 | 0.00233494 | 0          | 0.00369946 | 0.02266703 | 0.00510993 | 0.00122932 | 0          | 0.00114126 | 0.00084103 |
| 0.00411652 | 0.00248892 | 0.01621777 | 0.0074505  | 0.00025202 | 0.0016348  | 0.00903492 | 0.00457571 | 0.00464886 | 0.00319761 | 0          | 0.01470456 |
| 0          | 0          | 0.00241978 | 0          | 0          | 0.00033434 | 0.00027902 | 0.00365592 | 0.00013278 | 0          | 6.64E-05   | 0.00040702 |
| 0.0193895  | 0.01299855 | 0.02316071 | 0.01506087 | 0          | 0.01633276 | 0.14766786 | 0.05713138 | 0.07042249 | 0          | 0.0065335  | 0.11604436 |
| 0.00040467 | 0          | 0.00028123 | 0          | 0          | 0.00062092 | 0.00182691 | 0.00131929 | 0.00510147 | 0          | 0.0004387  | 0.00385885 |
| 0.32751439 | 0.23883255 | 0.38630864 | 0.11361291 | 0.28280916 | 0.19918456 | 0.30877517 | 0.21341172 | 0.40520312 | 0.4626227  | 0.29643102 | 0.23793772 |
| 0.0690389  | 0.00907091 | 0.0270511  | 0.01086572 | 0.07682341 | 0.03778918 | 0.01654188 | 0.03682404 | 0.01922651 | 8.95E-05   | 0.03202647 | 0.02939563 |
| 0.03192744 | 0.00540869 | 0.01426671 | 0.01803041 | 0.03136006 | 0.01948946 | 0.00532795 | 0.01180395 | 0.01787012 | 0.00134462 | 0.01489788 | 0.01045668 |
| 0.00021629 | 0.00071552 | 0.00346854 | 0.00019377 | 0.00011632 | 0.00017368 | 0.001043   | 0.00736063 | 0.00352948 | 4.96E-05   | 0.00080617 | 0.00655735 |
| 0.02056864 | 0.0049009  | 0.01501667 | 0.00916053 | 0.01262674 | 0.0108118  | 0.0200097  | 0.01629372 | 0.01384092 | 0.00777704 | 0.00959952 | 0.01958209 |
| 0.01035409 | 0.00015387 | 0.00383766 | 0          | 0.00342163 | 0.0019496  | 0.00676955 | 0.00152833 | 0.00254859 | 0          | 0.00027843 | 0.00787961 |
| 0.001528   | 0.00016542 | 0.00080269 | 0.00094463 | 0.00099515 | 0.00092921 | 0.00210593 | 0.00012543 | 0.00044404 | 0.00022732 | 0.0010069  | 0.00022038 |
| 0.08091401 | 0.01948821 | 0.00966152 | 0.00313909 | 0.00260418 | 0.15271988 | 0.01327337 | 0.00550247 | 0.00133926 | 0          | 0.00136789 | 0.002242   |
| 0.04814931 | 0.01240998 | 0.00264828 | 0.01610239 | 0.00959283 | 0.00069473 | 0.00717479 | 0.00116599 | 0.00139209 | 0          | 0          | 0.00093998 |
| 0.00023025 | 0.01409106 | 0.00121282 | 0.00097854 | 0          | 7.38E-05   | 0.00020594 | 0.00021601 | 6.57E-05   | 3.44E-05   | 0.00019102 | 0.00021138 |
| 0.07404151 | 0.08861636 | 0.15813496 | 0.04821512 | 0.01994494 | 0.02157149 | 0.09236881 | 0.08147789 | 0.02616125 | 0.11385883 | 0.01283552 | 0.3265676  |
| 0.00263736 | 0.00156952 | 0.00315801 | 0          | 0.0020323  | 0.00115065 | 0.00276633 | 0.00073959 | 0.01035193 | 0.00066533 | 0.00937728 | 0          |
| 0.00153497 | 0.00141949 | 0.00110735 | 0.00762974 | 0.00033925 | 0.00344327 | 0.01134016 | 0.00330288 | 0.00033981 | 0.00022594 | 0          | 0.00407023 |
| 0.00050235 | 0.00027697 | 0          | 0.00023253 | 0.00035218 | 0.00050151 | 0.00034545 | 0.00061784 | 0.0002156  | 0.00026589 | 0          | 0.00016416 |
| 0.00062097 | 0.00081169 | 0.00295295 | 0          | 6.14E-05   | 0          | 0.01729258 | 0.00503561 | 0.00293266 | 0          | 0.00320038 | 0.00119184 |
| 0.01675911 | 0.00821169 | 0.00744096 | 0.00811901 | 0.0024491  | 0.00014546 | 0.02111249 | 0.00450371 | 0.00106798 | 0          | 9.23E-05   | 0.00585799 |
| 0.00296529 | 0.00013464 | 0          | 0.00027612 | 0.00049111 | 0          | 0.00257761 | 0.0029475  | 0.00323107 | 0.00184472 | 0.01042026 | 0.00070161 |
| 0.02882261 | 0.00313135 | 0.00340995 | 0.0178318  | 0.03967018 | 0.00196697 | 0.03437921 | 0.09651038 | 0.01401654 | 0.06592915 | 0.02167582 | 0.01895694 |
| 0.00264434 | 0.00011541 | 0.00027537 | 0.00166159 | 0.00719866 | 0          | 0.00141503 | 0.00754877 | 0.00109654 | 0.00383272 | 0.0010069  | 0.00177876 |
| 0.00708878 | 0.00457777 | 0.00403686 | 0.00591002 | 0.03766373 | 0.00038862 | 0.01539259 | 0.02369615 | 0.003875   | 0.00773019 | 0.00577266 | 0.00473811 |
| 0.01525903 | 0.00845541 | 0.00505048 | 0.00900552 | 0.01158635 | 0.00362347 | 0.0169272  | 0.01136031 | 0.00674199 | 0.00379552 | 0.0030126  | 0.00885782 |
| 0.00222571 | 0.01280621 | 0.0274085  | 0.00377369 | 0.05358608 | 0.0384253  | 0.00868283 | 0.0196613  | 0.04001788 | 0.06176854 | 0.467997   | 0.00716676 |
| 0          | 0.00013849 | 0.00049802 | 0.00027128 | 0.00037156 | 0.00023447 | 0.00051154 | 0.0001742  | 0.00027271 | 0.00097953 | 0.02191702 | 0          |
| 0          | 0.00011541 | 0.00118352 | 0.31665609 | 0.04884621 | 0.01108752 | 0.00653703 | 0.00173041 | 0.015253   | 0.03168815 | 0          | 0.00069486 |
| 0.0002442  | 0.00081169 | 0          | 0          | 0.00642968 | 0.00301558 | 0          | 0.004513   | 0.00062822 | 0.00045601 | 9.39E-05   | 0          |
| 0.04239316 | 0.31039577 | 0.00888813 | 0.03333349 | 0.15269691 | 0.13942224 | 0.01770446 | 0.0573799  | 0.09412082 | 0.00616514 | 0.00066533 | 0.02717386 |
| 0.01457527 | 0.10390764 | 0.00940959 | 0.00997922 | 0.0568397  | 0.07421061 | 0.00464369 | 0.01869771 | 0.02951083 | 0.01353301 | 0.01229646 | 0.01049715 |
| 0          | 0          | 0          | 0          | 0.0016575  | 0.00114848 | 0          | 0.00202771 | 0.00129214 | 0.00020941 | 0.00011332 | 0          |
| 0.00037677 | 0.00080784 | 0          | 0.00150657 | 0.03136652 | 0.00222532 | 0.00056468 | 0.00379529 | 0.01438776 | 0.00810355 | 0.00695277 | 0.00124131 |
| 0          | 0.00011156 | 0          | 0          | 0.02354751 | 0.00033868 | 0          | 8.83E-05   | 0.00107512 | 0.001284   | 0.0001036  | 0          |
| 0          | 0.00016542 | 0.00161709 | 0.00218477 | 0.00025202 | 0.00087927 | 0.00257761 | 0.0012078  | 0.00673913 | 0.09613766 | 0          | 0.00150216 |
| 0.0505634  | 0.00217733 | 0.01080989 | 0.04224697 | 0.01331171 | 0.16989935 | 0.01954467 | 0.13808433 | 0.02062717 | 0.04543607 | 0          | 0.01916158 |
| 0.00706785 | 0.00102327 | 0.0012011  | 0.00202007 | 0.00882385 | 0.04392889 | 0.00304929 | 0.07244724 | 0.00624655 | 0.01378237 | 0          | 0.00579727 |
| 0.00016745 | 0          | 0.00021678 | 0.00068304 | 0.00014863 | 0.00128309 | 0.00013287 | 0.00147956 | 0.00012422 | 0.00129227 | 3.89E-05   | 0.00010119 |
| 0.0007326  | 0          | 0          | 0          | 0.00710819 | 0.00655221 | 0.00012622 | 0.02151746 | 0.0012693  | 0.00722596 | 0.000327   | 0.00028559 |
| 0.00025118 | 0          | 0          | 0.00021799 | 0.00215507 | 0.00192789 | 0          | 0.00632238 | 0.00021845 | 0.00790103 | 4.53E-05   | 0          |
| 0          | 0.00041931 | 0.00351541 | 0.00018893 | 0.00216477 | 0.0009444  | 0.00092342 | 0.0016886  | 0.00481876 | 0.00459045 | 0.00156862 | 0.00010344 |
| 0.00691436 | 0.00546255 | 0.00867135 | 0.01245465 | 0.00171243 | 0.003554   | 0.00932059 | 0.00354676 | 0.0049287  | 0.01143066 | 0.00299155 | 0.0014302  |
| 0          | 0.00064627 | 0.00024608 | 0.0004699  | 0.00013893 | 0.00089881 | 0.00017273 | 0.00022298 | 0.00089665 | 0.00134875 | 0.00148445 | 0          |
| 0          | 0          | 0          | 0          | 0          | 0          | 0          | 0          | 0          | 0          | 0          | 0          |
| 0          | 0          | 0          | 0          | 0          | 0          | 0          | 0          | 0          | 0          | 0          | 0          |
| 0          | 0          | 0          | 0          | 0.00138287 | 5.86E-05   | 0.00075734 | 0          | 0.00094805 | 0          | 0          | 0.00056444 |
| 0.00214896 | 0.0021427  | 0          | 0.00239792 | 0.00136671 | 0.00109638 | 0.0034346  | 0          | 0          | 0          | 0          | 0.00034631 |
| 0          | 0          | 0.00024608 | 0.00098339 | 0          | 7.38E-05   | 0.0001993  | 0          | 6.28E-05   | 9.37E-05   | 0          | 0.00029234 |
| 0          | 0.00051933 | 0.00217956 | 0.00026159 | 0          | 6.30E-05   | 0.0028832  | 0.00106844 | 0.00019989 | 0          | 0          | 9.89E-05   |
| 0.00060003 | 0          | 0          | 0          | 0          | 0          | 0.00257097 | 0          | 0          | 0          | 0          | 0.00074658 |
| 0          | 0          | 0          | 0.00018893 | 5.17E-05   | 0          | 0          | 8.36E-05   | 0          | 0          | 0          | 0          |

| HC12       | HC11       | HC10       | HC71       | HC15       | HC08       | HC06       | HC05       | HC04       | HC03       | HC02       | HC01       |
|------------|------------|------------|------------|------------|------------|------------|------------|------------|------------|------------|------------|
| 0          | 3.88E-05   | 0          | 0          | 0.00010388 | 0          | 3.86E-05   | 0          | 5.90E-05   | 0          | 0          | 0          |
| 0          | 0          | 0          | 0          | 0          | 0          | 0          | 0          | 0          | 0          | 0          | 0          |
| 0          | 0          | 0          | 0          | 0          | 0          | 0          | 0          | 0          | 0          | 0          | 0          |
| 0          | 0          | 0          | 0          | 0          | 0          | 0          | 0          | 0          | 0          | 0          | 0          |
| 0          | 0          | 0          | 0          | 0          | 0          | 0          | 0          | 0          | 0          | 0          | 0          |
| 0          | 0          | 3.72E-05   | 0          | 6.61E-05   | 0          | 3.86E-05   | 0          | 8.18E-05   | 0          | 0.00013585 | 0          |
| 0          | 0          | 0          | 0          | 0.00013694 | 0          | 3.28E-05   | 0          | 3.23E-05   | 0          | 0.00013585 | 0          |
| 0          | 0          | 0          | 0          | 0          | 0          | 0          | 0          | 0.00024161 | 0          | 0          | 0          |
| 0          | 0.00060918 | 0.00031445 | 0.0004336  | 5.67E-05   | 0.0001059  | 0.00010033 | 0.00701878 | 0.00090367 | 0          | 0          | 9.88E-05   |
| 0.00027905 | 0.00024828 | 0.00061649 | 9.47E-05   | 0.00015268 | 0.0005295  | 8.49E-05   | 0          | 0.00095313 | 0          | 0          | 8.58E-05   |
| 0          | 4.24E-05   | 0.00033514 | 0          | 0          | 0.00012915 | 3.67E-05   | 0          | 0.00047942 | 0          | 0          | 0          |
| 0          | 0          | 0.00335757 | 0          | 0          | 0.00026087 | 0          | 0.00796685 | 0.0003063  | 8.75E-05   | 0          | 4.55E-05   |
| 0          | 0          | 0          | 8.71E-05   | 5.19E-05   | 0.00014464 | 6.37E-05   | 0          | 0.00096074 | 8.90E-05   | 0          | 0          |
| 0.0016629  | 0.00024343 | 0.02015785 | 0.00180823 | 0.00071616 | 0.00321056 | 0.00088559 | 0.00171264 | 0.00027395 | 0.00028158 | 0          | 0.00076859 |
| 0.01440799 | 4.72E-05   | 0.00047374 | 0.00780854 | 0.00601261 | 0.00014981 | 0.0036639  | 0.02753991 | 0.00417019 | 0.00426739 | 0.00942714 | 5.20E-05   |
| 0.00130412 | 0.00015018 | 0.00821292 | 0.00085773 | 0.01091557 | 0          | 0.0068551  | 0.00599425 | 0.01537379 | 0.00866026 | 0.00032022 | 0.00049289 |
| 0.02497765 | 0.01556388 | 0          | 0.01673799 | 0.07497352 | 0.00298068 | 0.01413853 | 0          | 0.0003101  | 0.04600762 | 0.10433901 | 0.02103938 |
| 0.02386715 | 0.00588717 | 0          | 0.0126368  | 0.00942658 | 0.01295588 | 0.0055354  | 0.02159153 | 0.0989527  | 9.34E-05   | 0.00399307 | 0.00722424 |
| 0.00943638 | 0.01110944 | 0          | 0.01734199 | 0.0002723  | 0.01911871 | 0.0015956  | 0          | 0.00063542 | 0.05965598 | 0.04616049 | 0.04630016 |
| 0.01265397 | 0.04142818 | 0          | 0.00051312 | 0.01047013 | 0.00098409 | 0.00035308 | 0.0007187  | 0          | 0.0080227  | 0.00597748 | 0.0055297  |
| 0.00247726 | 0.00028824 | 0          | 0.00352747 | 0          | 0.00158849 | 0.00088752 | 0          | 0          | 0.0004975  | 0.00151378 | 3.90E-05   |
| 0.00167998 | 0.00026886 | 0          | 0.00042034 | 0.00032896 | 0.00040293 | 0.0006695  | 0          | 0          | 0.0002451  | 0.00449281 | 0          |
| 0.00854798 | 0.00169797 | 0          | 0.00669625 | 0.00700265 | 0.00956452 | 0.00080507 | 0          | 4.19E-05   | 0.00650395 | 0.00603085 | 0.0026452  |
| 0.04757484 | 0.0156317  | 0          | 0.00434733 | 0.00073505 | 0.00419465 | 0.00612001 | 0          | 0          | 0.01402331 | 0.00753007 | 0.00349312 |
| 0.01166876 | 0.00092165 | 0          | 0.00430189 | 0.00127178 | 0.0207227  | 0.0005055  | 0          | 0          | 0.00452125 | 0.00073748 | 0.00564154 |
| 0.00931109 | 0.00227808 | 0          | 0.00226266 | 0.00850265 | 0.02322812 | 0.0009589  | 0          | 0          | 0.00403105 | 0.00228522 | 0.00805265 |
| 0.02023383 | 0.0001308  | 0          | 0.00015905 | 0.00028017 | 0.10598461 | 9.45E-05   | 0          | 0          | 0.00033556 | 0.00016496 | 9.75E-05   |
| 0.05012045 | 0.02656432 | 0          | 0.02444049 | 0.04155629 | 0.07039725 | 0.02372757 | 0          | 3.23E-05   | 0.07111594 | 0.0186214  | 0.03677405 |
| 0.00168568 | 0.00385131 | 0          | 0.00034461 | 0.00234366 | 0.00152392 | 0.00268956 | 0          | 0          | 0.00255898 | 0.00069381 | 0.00221084 |
| 0.29842195 | 0.42246765 | 0.76734901 | 0.18599992 | 0.40642909 | 0.16329425 | 0.65790276 | 0.01746284 | 0.00380873 | 0.22081613 | 0.52234034 | 0.18227324 |
| 0.01488066 | 0.05618183 | 0.16345977 | 0.01837392 | 0.01200004 | 0.0358379  | 0.03249662 | 0          | 3.61E-05   | 0.00468465 | 0.04804786 | 0.00180769 |
| 0.01136694 | 0.02614407 | 0.0298706  | 0.01185102 | 0.00462594 | 0.01356287 | 0.02311981 | 0          | 7.04E-05   | 0.00662212 | 0.02977094 | 0.00544256 |
| 0.0007802  | 0.00019135 | 0          | 0.00050365 | 0.00210441 | 0.00449168 | 0.00289408 | 0          | 0          | 0.00066819 | 0.00084907 | 0.00021718 |
| 0.01445355 | 0.02002921 | 0.00077785 | 0.00872496 | 0.00810758 | 0.01402263 | 0.01605441 | 0          | 3.61E-05   | 0.01300643 | 0.03772312 | 0.00541785 |
| 0.00229503 | 0.00519926 | 0          | 0.00311092 | 0.00236727 | 0.00268365 | 0.00658113 | 0          | 0          | 0.00367215 | 0.02030984 | 0.00096237 |
| 0.06117417 | 0.00013443 | 0          | 0.00100731 | 0.0001086  | 0.00066123 | 0.00017172 | 0          | 0.0001541  | 9.19E-05   | 0.00082481 | 0.00022499 |
| 0.14192725 | 0.02305212 | 0          | 0.03766426 | 0.00091606 | 0.00918225 | 0.01578044 | 0          | 0          | 0.00016048 | 0.00509929 | 0.00063594 |
| 0.00634407 | 0.00042267 | 0          | 0.01069981 | 0          | 0.00611375 | 0.00145669 | 0          | 0          | 0          | 0.00082481 | 0          |
| 0.00067769 | 0          | 0.00078199 | 0          | 0.00350526 | 0.00069997 | 2.32E-05   | 0.00061166 | 0.00346058 | 8.75E-05   | 0          | 5.85E-05   |
| 0.06132793 | 0.01646857 | 0          | 0.06503011 | 0.09061733 | 0.15260874 | 0.02010419 | 0.02610251 | 0.19393876 | 0.03441489 | 0.02947498 | 0.02473668 |
| 0.00229503 | 0.0014836  | 0          | 0.00177604 | 0.00486203 | 0.00248218 | 0.00079684 | 0.00094807 | 3.23E-05   | 0.00177115 | 0.00147981 | 0.00108201 |
| 0.00060935 | 0.00167374 | 0.00062476 | 0.00130268 | 0.00036202 | 0.00154716 | 0.00149527 | 0.00068812 | 0.00184348 | 0.00087682 | 0.00521089 | 0.00072828 |
| 0          | 0.00025191 | 0          | 0.00010603 | 0          | 0.00060957 | 0          | 0          | 0          | 0          | 0.00031537 | 0.00027831 |
| 0.01835453 | 7.75E-05   | 0          | 0.01131329 | 0.0005446  | 0.01624651 | 0.00149141 | 0          | 0.0004642  | 0.00326073 | 0.00442489 | 0.00116264 |
| 0.00204445 | 0.0004033  | 0.00027928 | 0.00248798 | 0.00265688 | 0.00373231 | 0.00073895 | 0          | 0.00026825 | 0.00032826 | 0.00347392 | 0.0013057  |
| 0          | 0.00024949 | 0          | 0.00019881 | 0.00039664 | 0.00161174 | 9.65E-05   | 0          | 0          | 0.00192726 | 0.00096067 | 0.00089864 |
| 0.00700468 | 0.0006649  | 0          | 0.00530541 | 0.03442772 | 0.01197696 | 0.00229597 | 0          | 0          | 0.0114089  | 0.02020795 | 0.00574818 |
| 0.00167998 | 4.84E-05   | 0          | 0.00035218 | 0.00159759 | 0.00065348 | 0.0003087  | 0.00131507 | 0.0003082  | 0.00017799 | 0.00151378 | 0.00062424 |
| 0.0086391  | 0.00107667 | 0          | 0.00414473 | 0.01122879 | 0.00728898 | 0.00132935 | 0.00278304 | 0.00045469 | 0.00151292 | 0.00308578 | 0.00687701 |
| 0.00485202 | 0.00333416 | 0          | 0.00619154 | 0.00203831 | 0.00571082 | 0.002213   | 0.00842559 | 0.00046991 | 0          | 0.00929129 | 0.00117955 |
| 0.00215266 | 0.00788185 | 0.0010654  | 0.13428826 | 0.04460667 | 0.0451028  | 0.0022651  | 0.12843293 | 0.01763581 | 0.22299287 | 0.00244533 | 0.01643303 |
| 0          | 0.00160834 | 0          | 0.00098837 | 0.00077755 | 0.00013173 | 0          | 0.29882562 | 0.00262349 | 0.00853771 | 0          | 0.00310428 |
| 0          | 0          | 0.00017377 | 0.02864581 | 0.02999381 | 0.01175483 | 0.00337063 | 0.0021561  | 0.10089321 | 0          | 0.00129059 | 0          |
| 0          | 0.00063098 | 0          | 0.00306169 | 0.00018258 | 0          | 2.51E-05   | 0          | 0.00060498 | 0          | 0.00048518 | 0.00451141 |
| 0.04004624 | 0.18328218 | 0.00131779 | 0.17142424 | 0.06292153 | 0.01688191 | 0.06143932 | 0.24214019 | 0.43016732 | 0.00015757 | 0.01891736 | 0.35443904 |
| 0.02450497 | 0.04265866 | 0.00032479 | 0.0839285  | 0.02120155 | 0.01363777 | 0.01523828 | 0.15571289 | 0.08539576 | 0.01300643 | 0.00526426 | 0.13426813 |
| 0          | 0          | 0          | 0.00223236 | 0          | 0.00086269 | 0          | 0          | 0          | 0          | 0          | 9.88E-05   |
| 0          | 0.00766749 | 0          | 0.01595032 | 0.00140399 | 0.00104091 | 0.00135443 | 0.02162212 | 0.01044071 | 0.00164131 | 0.00040756 | 0.0511367  |
| 0.0002164  | 4.12E-05   | 0          | 0.00174954 | 0.00010388 | 0.00017306 | 5.60E-05   | 0          | 0.00263871 | 0          | 0.00024259 | 0          |
| 0          | 0          | 0          | 0          | 0.00015425 | 0          | 0.00077175 | 0.00099394 | 0          | 0          | 0.00031537 | 9.88E-05   |
| 0.01275648 | 0.0373286  | 0          | 0.04334835 | 0.04649545 | 0.14250181 | 0.04212811 | 0.00334883 | 0.0060327  | 0.15398217 | 0.00774355 | 0.03134579 |
| 0.00423697 | 0.00828273 | 0          | 0.01606771 | 0.02282905 | 0.02822864 | 0.0085491  | 0.00253838 | 0.00306296 | 0.05520476 | 0.00149922 | 0.00588863 |
| 0          | 0.00011748 | 0          | 0.00050365 | 0.00015897 | 0.00056049 | 0.00018908 | 0          | 0.00011034 | 0          | 0          | 0.00098968 |
| 0          | 0.00091802 | 0          | 0.0024236  | 0.00089402 | 0.00122172 | 0.00020451 | 0          | 0          | 0.00434326 | 0.00045607 | 0.00081801 |
| 0          | 0.00111906 | 0          | 0.00119476 | 0.00029119 | 0.0001214  | 4.05E-05   | 0.00157502 | 0.00021688 | 0.00314985 | 0.00031052 | 0.00088173 |
| 0.00499439 | 0.00024101 | 0          | 0.00096187 | 5.51E-05   | 0.00013173 | 0          | 0.00077986 | 0          | 0.00033701 | 0.00029111 | 0.00041486 |
| 0.00735776 | 0.00106335 | 0.0004696  | 0.00699436 | 0.00295909 | 0.00231171 | 0.00329346 | 0.01024527 | 0.00958079 | 0          | 0.00084422 | 0.00838168 |
| 0.00025627 | 0.00038876 | 0          | 0.00261862 | 0.00040766 | 0.00010848 | 0.00018136 | 0.00074928 | 0.00116621 | 0          | 0.00015526 | 0.00464276 |
| 0          | 0          | 0          | 0          | 0          | 0          | 3.47E-05   | 0          | 0          | 0          | 0.00023774 | 0.00020808 |
| 0          | 0          | 0          | 0          | 0          | 0          | 0          | 0          | 0          | 0          | 0          | 0          |
| 0.00079728 | 0          | 0          | 0.00036922 | 0          | 0.00068964 | 0.00086243 | 0          | 0          | 0          | 0.00015526 | 0          |
| 0.00135538 | 0          | 0          | 0.0012686  | 0.00023295 | 0.00031253 | 8.88E-05   | 0          | 0.00027586 | 0          | 0          | 0          |
| 0          | 0          | 0          | 0          | 0          | 0          | 6.17E-05   | 0          | 0          | 0          | 0          | 0          |
| 0          | 0.00021437 | 0          | 0.00071572 | 5.82E-05   | 0.00066123 | 0.00028555 | 0          | 0          | 0          | 0.00055311 | 8.58E-05   |
| 0.00030752 | 0          | 0          | 0          | 0          | 0.00036936 | 0.00025275 | 0          | 0          | 0.00016048 | 0.00059678 | 0          |
| 0          | 0          | 0          | 0          | 0          | 0          | 0          | 0          | 0          | 0          | 0          | 0          |

| HC07       | HC16       | HC17       | HC18       | HC33       | HC32       | HC31       | HC30       | HC29       | HC28       | HC27       | HC26       |
|------------|------------|------------|------------|------------|------------|------------|------------|------------|------------|------------|------------|
| 0          | 0          | 0          | 0          | 0          | 0          | 0          | 0          | 0          | 0          | 0          | 0          |
| 0          | 0          | 0          | 0          | 0          | 0          | 0          | 0          | 0          | 0          | 0          | 0          |
| 0          | 0          | 0          | 0          | 0          | 0          | 0          | 0          | 0          | 0          | 0          | 0          |
| 0          | 0          | 0          | 0          | 0          | 0          | 0          | 0          | 0          | 0          | 0          | 0          |
| 0          | 0          | 0          | 0          | 0          | 0          | 0          | 0          | 0          | 0          | 0          | 0          |
| 0          | 0          | 0          | 0          | 0          | 0.0002326  | 0          | 0          | 0          | 0          | 0          | 0          |
| 0          | 0          | 0          | 0          | 0          | 0.00025282 | 0.00010121 | 0          | 0          | 0          | 9.70E-05   | 0          |
| 0          | 0          | 0          | 0          | 8.27E-05   | 0          | 0          | 0          | 0          | 0          | 0          | 0          |
| 0          | 0          | 4.36E-05   | 0.00029845 | 0.00047662 | 0.00282656 | 0          | 0          | 8.50E-05   | 8.49E-05   | 9.16E-05   | 0          |
| 0.00010807 | 0          | 8.72E-05   | 0.00029845 | 0.0006442  | 0.00188606 | 0          | 0.00026239 | 0.0003712  | 4.10E-05   | 0.00049055 | 0          |
| 0          | 0          | 0          | 0.00020128 | 0.00047227 | 0.00046519 | 0          | 0          | 0          | 4.24E-05   | 0.00022641 | 0          |
| 0          | 0          | 9.86E-05   | 0.00026143 | 0.00036345 | 0          | 0.00038497 | 6.30E-05   | 0          | 4.81E-05   | 0          | 0.00232577 |
| 0          | 0          | 0          | 0          | 0          | 0          | 0          | 0          | 0          | 0          | 6.47E-05   | 0          |
| 0          | 0.00173923 | 0.00361607 | 0.00043263 | 0.00010664 | 0.01188267 | 0.00033075 | 0.00032956 | 0.02071055 | 0.00127318 | 9.16E-05   | 0.00023922 |
| 0.00162109 | 0.00026424 | 5.88E-05   | 0          | 0          | 0.00424237 | 0.00010483 | 6.51E-05   | 0.00020685 | 0.00343051 | 0.00417237 | 0.00225932 |
| 0.00540844 | 0.00027607 | 0.00210858 | 0.00613554 | 0          | 0.00641664 | 0.00020604 | 0.00270789 | 0.0101385  | 8.49E-05   | 0.02150874 | 0.00136223 |
| 0.07198849 | 0.03882119 | 0.00928574 | 0.0003586  | 5.44E-05   | 0.05700648 | 0.02613643 | 0.0238567  | 0.14121651 | 0.02112631 | 0.01105625 | 0.05364547 |
| 0.03376194 | 0.01006862 | 0.00521647 | 0.0115238  | 0          | 0.01225179 | 0.0097309  | 0.00409122 | 0.00940744 | 0.00517477 | 0.00950374 | 0          |
| 0.03186226 | 0.00118907 | 0.00017066 | 0          | 0          | 0.11111561 | 0.00194654 | 0.00162053 | 0.00042787 | 0.01965084 | 0.01043632 | 0.00075754 |
| 0.001184   | 0.00532616 | 0.01763854 | 0.00061309 | 0          | 0.00155739 | 0.00230802 | 0.00047021 | 0.02921408 | 0.00211914 | 0.00591356 | 0          |
| 0.00062442 | 0.00050678 | 0.00040389 | 0          | 0          | 0.00100623 | 0.00847658 | 0          | 9.92E-05   | 0.00035225 | 0.00587582 | 0          |
| 0.00131609 | 0.00121667 | 0.00067695 | 0          | 0          | 0.00050059 | 9.40E-05   | 9.66E-05   | 0.00010484 | 0.00060264 | 0.00169806 | 0.00025916 |
| 0.00421484 | 0.00346466 | 0.00461537 | 0          | 0          | 0.00543063 | 0.00474255 | 0.00113144 | 0.01197182 | 0.00613815 | 0.00797818 | 0.01114375 |
| 0.00170755 | 0.00111019 | 0.00461537 | 0          | 0          | 0.04906279 | 0.00310145 | 0.0002435  | 0.00056105 | 0.00316598 | 0.00256056 | 0.00227925 |
| 0.00256973 | 0.00527094 | 0.03708985 | 0.00318113 | 0          | 0.00361537 | 0.00425456 | 0.00117762 | 0.00379698 | 0.00179801 | 0.00268455 | 0          |
| 0.00363125 | 0.00771218 | 0.00753364 | 0.00011336 | 0          | 0          | 0.00010483 | 0.00176118 | 0.01417351 | 0.00326217 | 0.00253361 | 0          |
| 0          | 0.00025832 | 4.93E-05   | 0.00011105 | 0          | 0.00022248 | 0.00031087 | 0.00017213 | 0.00044487 | 5.94E-05   | 0.00030727 | 0          |
| 0.03283011 | 0.05558842 | 0.04284484 | 0.0056335  | 0          | 0.05752729 | 0.01174431 | 0.03728069 | 0.04853335 | 0.0180056  | 0.04343795 | 0.31498193 |
| 0.00083096 | 0.00112202 | 0.00137286 | 0          | 0          | 0.00526883 | 0.00031448 | 0.00214322 | 0.00141962 | 0.00265667 | 0.00119673 | 0.01583515 |
| 0.18272949 | 0.08252682 | 0.14246598 | 0.2888584  | 4.57E-05   | 0.43489055 | 0.03094585 | 0.25919737 | 0.28950843 | 0.44962378 | 0.35673779 | 0.35681915 |
| 0.00051154 | 0.01434177 | 0.03038485 | 0          | 0          | 0.0299595  | 0.02636416 | 0.00455093 | 0.00288174 | 0.0272588  | 0.01378392 | 0          |
| 0.00349916 | 0.01596072 | 0.01479233 | 0.00064085 | 0          | 0.00995616 | 0.01217085 | 0.00279395 | 0.0011901  | 0.01584686 | 0.00573566 | 0.00421296 |
| 0.00057879 | 0.00218292 | 0.00349661 | 0.00672318 | 0          | 0.00255351 | 0.00011567 | 0.00034216 | 0.00327277 | 0.00322822 | 0.00220478 | 0          |
| 0.00499777 | 0.00904125 | 0.01168254 | 0.00569134 | 0          | 0.01495194 | 0.00568058 | 0.00265541 | 0.00644407 | 0.02232027 | 0.00851185 | 0.00766839 |
| 0.00325419 | 0.00142767 | 0.00179761 | 0          | 0          | 0.00689701 | 0.00038678 | 0.00133715 | 0.00132894 | 0.00721328 | 0.00231259 | 0.00682446 |
| 0.00019453 | 0.0003865  | 0.00033184 | 0.00177449 | 0          | 0.00047531 | 0.00051149 | 0          | 9.35E-05   | 0.00017542 | 0          | 0          |
| 0.00061962 | 0.00019916 | 0.02444972 | 0.05529155 | 4.14E-05   | 0.00350918 | 0.06520824 | 0.00182415 | 0.00137995 | 0.00069601 | 0.00349854 | 0          |
| 0.00438776 | 0.00094652 | 0          | 0          | 0          | 0.00139053 | 0          | 0.00620925 | 0.00098041 | 0          | 0.00638254 | 0          |
| 0.00018973 | 0          | 0.00016497 | 0.00116372 | 0.00047009 | 0.00052587 | 9.94E-05   | 6.51E-05   | 0.00017285 | 0          | 0.00038813 | 0.00043193 |
| 0.05768926 | 0.06931298 | 0.04270263 | 0.00221638 | 0.60873284 | 0.0529158  | 0.05298678 | 0.01700722 | 0.06156776 | 0.04628719 | 0.13990383 | 0.21013636 |
| 0.00183724 | 0.00250828 | 0.00064317 | 0.00064317 | 0.00131452 | 0.00235125 | 0.00091272 | 0.00047441 | 0.00096625 | 0.00433023 | 0.00229642 | 0.0063128  |
| 0.00385219 | 0.00204685 | 0.01560959 | 0.00474509 | 0          | 0.00019215 | 0.01082617 | 0.00767865 | 0.00518826 | 0.00064791 | 0.0288616  | 0          |
| 0.00010807 | 0          | 0.00055749 | 0.00110125 | 0          | 0          | 0          | 0.00099289 | 0          | 0          | 0.00048516 | 0          |
| 0.00507222 | 0.0092976  | 0.00014032 | 0.00046965 | 4.57E-05   | 0.00588066 | 0.000244   | 0.0009719  | 9.35E-05   | 4.95E-05   | 0.00778411 | 0.00023258 |
| 0.00422445 | 0.00270745 | 0.00230958 | 9.72E-05   | 0          | 0.00411595 | 0.00133565 | 0.00081027 | 0.00351929 | 0.00094781 | 0.00552543 | 0          |
| 0.00099187 | 0.00202911 | 0.00254282 | 0.00040024 | 0          | 0.00144615 | 0.00130131 | 4.83E-05   | 0.00538378 | 0.00063376 | 0.00019945 | 0          |
| 0.01793048 | 0.03122535 | 0.07485854 | 0.1452054  | 0          | 0.00723073 | 0.01556149 | 0.00786547 | 0.03706306 | 0.00765747 | 0.01450627 | 0.00029903 |
| 0.00396507 | 0.00271139 | 0.00464002 | 0.00491861 | 0          | 0.00020226 | 0.00127239 | 0.00042193 | 0.00180782 | 0.00065498 | 0.00133149 | 0          |
| 0.00769718 | 0.0083708  | 0.02194862 | 0.01340934 | 0          | 0.00995616 | 0.0011513  | 0.00372177 | 0.00058088 | 0.00258597 | 0.00219939 | 0.0002658  |
| 0.00455587 | 0.00707919 | 0.00530939 | 0          | 0          | 0.00243721 | 0.00120733 | 0.00103278 | 0.00209684 | 0.00176123 | 0.006237   | 0          |
| 0.01220502 | 0.1742132  | 0.030711   | 0.01966981 | 0.01246833 | 0.00684644 | 0.16338478 | 0.00260713 | 0.04368511 | 0.11544778 | 0.00276541 | 0          |
| 0.00021134 | 0.00043777 | 0.00022375 | 0.00135343 | 0.00037216 | 0          | 0.00463953 | 6.09E-05   | 0.00011334 | 0.00070308 | 0          | 0          |
| 0.02698938 | 0.00175895 | 0.04072678 | 0.00693371 | 3.70E-05   | 0          | 0.04483371 | 0          | 0          | 0          | 0.02563798 | 0          |
| 0.02604314 | 0.01014356 | 0.00323873 | 0.00056219 | 0.00271174 | 0.00024777 | 0.0105876  | 5.88E-05   | 0.00020402 | 0.0020668  | 0.00256056 | 0          |
| 0.28878493 | 0.15762739 | 0.19915884 | 0.0508773  | 0.2162208  | 0.03988026 | 0.16168404 | 0.03305513 | 0.17036258 | 0.07220774 | 0.06201956 | 0.00049173 |
| 0.08909041 | 0.11780841 | 0.06120584 | 0.02025514 | 0.07059658 | 0.01600368 | 0.07640853 | 0.01180765 | 0.05626332 | 0.04611885 | 0.02323375 | 0          |
| 0.00419803 | 0.0244735  | 0.00105998 | 0.00049973 | 0.00011535 | 0          | 0.00323881 | 0          | 0.00010484 | 0.00139625 | 0.00057141 | 0          |
| 0.00463752 | 0.05898209 | 0.04799305 | 0.00599441 | 0.0568442  | 0.00022248 | 0.0407364  | 0.00600983 | 0.00475756 | 0.01710023 | 0.00452816 | 0          |
| 0.00079974 | 0.01039399 | 0.0069022  | 0.00193182 | 0.00167362 | 0          | 0.00081151 | 0.00036315 | 0.00010201 | 0.00023908 | 0.00174118 | 0          |
| 0.00039867 | 0.00065862 | 0          | 0.19980289 | 0          | 0          | 0.00108985 | 0          | 0          | 0.00190128 | 0.0010404  | 0          |
| 0.00973856 | 0.00572843 | 0.03679404 | 0.08268862 | 0          | 0.00657845 | 0.11057151 | 0.3319535  | 0.00058371 | 0.0297415  | 0.08588941 | 0.00028574 |
| 0.00250969 | 0.01304031 | 0.02036718 | 0.00800026 | 0          | 0.0026243  | 0.03750662 | 0.1945838  | 0.00049021 | 0.02247164 | 0.01857083 | 0          |
| 0.00217587 | 0.00026424 | 0.00027495 | 0.00177449 | 0          | 0          | 0.00138264 | 0.00203616 | 0          | 0.00029142 | 0.00194064 | 0          |
| 0.01613887 | 0.01473221 | 0.00298843 | 0.00821311 | 0          | 0          | 0.01801409 | 0.00240771 | 0          | 0.00243178 | 0.00606988 | 0          |
| 0.00161869 | 0.00324972 | 0.00111497 | 0.01281707 | 0          | 0          | 0.00724034 | 0.00368819 | 0          | 0.00015703 | 0.00320744 | 0          |
| 0.00100628 | 0.00070595 | 0.00162315 | 0.00242923 | 0.00050709 | 0.00095061 | 0.00543658 | 0.00431583 | 0.00113059 | 0.00296227 | 0.00282471 | 0          |
| 0.00748104 | 0.00427315 | 0.00328423 | 0.01291655 | 0.02197247 | 0.00112759 | 0.00568419 | 0.00502953 | 0.00211384 | 0.00228041 | 0.01116406 | 0          |
| 0.0014866  | 0.00098202 | 0.00113393 | 0.0007681  | 0.00316224 | 0          | 0.00253755 | 0.00017213 | 8.78E-05   | 0.0010044  | 0.0002318  | 0          |
| 0          | 9.07E-05   | 0          | 0          | 0          | 0          | 0          | 0          | 0.00011051 | 0          | 0          | 0.00093031 |
| 0          | 0          | 0          | 0          | 0          | 0          | 0          | 0          | 0          | 0          | 0          | 0          |
| 0          | 0.00194628 | 0.00057645 | 0          | 0          | 0          | 0.00054944 | 0.00260083 | 0          | 0          | 0.00125063 | 0          |
| 0.00170995 | 0          | 0          | 0          | 0          | 0          | 0.00060366 | 0.00142322 | 0          | 0          | 0.00135845 | 0          |
| 0          | 0          | 0.00106946 | 0          | 0          | 0          | 0          | 0.00018053 | 0          | 0          | 0.00020485 | 0          |
| 9.61E-05   | 8.48E-05   | 0          | 0          | 3.70E-05   | 0.00091016 | 0.00029099 | 0.00017213 | 0.00149046 | 0.00044278 | 0.00152556 | 0          |
| 0.00013449 | 0.00016761 | 0          | 0          | 0          | 0          | 0          | 0          | 0          | 0          | 0.00085172 | 0          |
| 0          | 0          | 0          | 0          | 0.00043092 | 0          | 9.22E-05   | 0          | 0          | 0          | 0          | 0          |

| HC25       | HC24       | HC23       | HC22       | HC21       | HC20       | HC19       | HC35       | HC72       |
|------------|------------|------------|------------|------------|------------|------------|------------|------------|
| 0          | 0          | 0          | 9.49E-05   | 0          | 0          | 0          | 0          | 0          |
| 0          | 0          | 0          | 0          | 0          | 0          | 0          | 0          | 0          |
| 0          | 0          | 0          | 0          | 0          | 0          | 0          | 0          | 0          |
| 0          | 0          | 0          | 0          | 0          | 0          | 0          | 0          | 0          |
| 0          | 0          | 0          | 0          | 0          | 0          | 0          | 0          | 0          |
| 0          | 0          | 0          | 0          | 0          | 0          | 0          | 0          | 0          |
| 0          | 0          | 0          | 0          | 0          | 0          | 0          | 0          | 7.95E-05   |
| 0          | 9.19E-05   | 0          | 0          | 0          | 0          | 0          | 0          | 0          |
| 0.00083695 | 0.00031578 | 0.00071357 | 0          | 0.00016889 | 0.00029112 | 0          | 0.00249828 | 0.000147   |
| 0          | 0.00024383 | 0          | 0          | 0.00016514 | 0          | 0          | 0.00224867 | 0.00023044 |
| 0          | 0          | 0          | 0          | 0.00015388 | 0          | 0          | 0.0006315  | 0          |
| 0          | 0          | 0          | 0.00011927 | 0          | 0          | 0          | 0          | 0.0001033  |
| 0          | 9.19E-05   | 0          | 0          | 0          | 0          | 0          | 0.00013227 | 6.75E-05   |
| 0.00043278 | 0.00097731 | 0.00021499 | 0.00086741 | 0.00130612 | 0          | 0.00073936 | 0.02130047 | 0.00052445 |
| 0.00025037 | 0.00214649 | 0.00699848 | 0.05550631 | 0.00555474 | 0          | 0.00608197 | 0.21114435 | 0.00059994 |
| 0.00134484 | 0.00829018 | 0.00682923 | 0.02912882 | 0.01042265 | 0.00051755 | 0.00336681 | 0.06976417 | 0.00226466 |
| 0.07436683 | 0.06095721 | 0.01036964 | 0.11054639 | 0.04514354 | 0.04142734 | 0.05627078 | 0.02549059 | 0.13471571 |
| 0.01482544 | 0.00991504 | 0.0219926  | 0.01286482 | 0.01971183 | 0.02836837 | 0.01717238 | 0.0050435  | 0.00233221 |
| 0.00937097 | 0.01280501 | 0.0173361  | 0.10225717 | 0.03625595 | 0.13966535 | 0.01663353 | 0.00290364 | 0.0073383  |
| 0.00050432 | 0.00140302 | 0.01424853 | 0.03472634 | 0.07263201 | 0.01847479 | 0.00447376 | 0.0004779  | 0          |
| 0.00082622 | 0.00202858 | 0.0016467  | 0          | 0.00128735 | 0.0002865  | 0.00208441 | 0.00089605 | 0.001625   |
| 0.001935   | 0.00243429 | 0.00179307 | 0.00112764 | 0.00107342 | 0.00053142 | 0.00093987 | 0.00105606 | 0.00189517 |
| 0.00522914 | 0.00758468 | 0.00474341 | 0.02198892 | 0.00476282 | 0.00159425 | 0.00582717 | 0.00464241 | 0.00649998 |
| 0.00152368 | 0.0032757  | 0.00811    | 0.00332057 | 0.00595258 | 0.00219498 | 0.00701348 | 0.00299111 | 0.00307915 |
| 0.00549382 | 0.00403517 | 0.00016924 | 0.00524243 | 0.0006418  | 0.00229202 | 0.00214289 | 0.00017921 | 0.00166075 |
| 0.00898468 | 0.02761461 | 0.0019486  | 0.01778468 | 0.00453762 | 0.00150645 | 0.00283213 | 0          | 0.04085135 |
| 0.0002003  | 0.03085034 | 0          | 0.09626118 | 0.00085198 | 0.00182992 | 0.00765259 | 0          | 0.00020263 |
| 0.06325401 | 0.06255808 | 0.062259   | 0.16723997 | 0.08013091 | 0.0541767  | 0.10012281 | 0.01647032 | 0.02949625 |
| 0.00211383 | 0.00248226 | 0.00443694 | 0.00433978 | 0.00101712 | 0.00054528 | 0.00237264 | 0.00109873 | 0          |
| 0.32518322 | 0.24821176 | 0.37973369 | 0.17035724 | 0.14853306 | 0.08127891 | 0.28237314 | 0.35091376 | 0.12633645 |
| 0.02152103 | 0.01783348 | 0.12530933 | 0.00156948 | 0.01221293 | 0.00030961 | 0.01820832 | 0.03928128 | 0.01466469 |
| 0.01192116 | 0.01308681 | 0.0887663  | 0.00053942 | 0.01003232 | 0.00085489 | 0.0154305  | 0.01437953 | 0.00462865 |
| 0.00309743 | 0.00177276 | 0.00599673 | 0.00093518 | 0.00290873 | 0          | 0.00065999 | 0.00303591 | 0.00014303 |
| 0.01272591 | 0.01387026 | 0.03070181 | 0.00535357 | 0.00787798 | 0.00166356 | 0.01161674 | 0.01828376 | 0.00329767 |
| 0.00218894 | 0.00616367 | 0.00491266 | 0.00343712 | 0.00174149 | 0.00152493 | 0.00458654 | 0.00299111 | 0.00050061 |
| 0.00089418 | 0.00041571 | 0.00230538 | 0.00027378 | 0.00067182 | 0.00024953 | 0.00103594 | 0.00012374 | 0.00083435 |
| 0.04916538 | 0.00873187 | 0.02373078 | 9.49E-05   | 0.00068684 | 0.00170053 | 0.00645792 | 0.00180064 | 0.04785989 |
| 0.00335137 | 0.01357447 | 0.01062122 | 0.00060448 | 0.0022294  | 0          | 0.00624488 | 0.00127794 | 0.00949967 |
| 0.00023606 | 0.00032577 | 0.00018297 | 0.00230136 | 0          | 0.00123843 | 0.0036425  | 0          | 0.00470017 |
| 0.078641   | 0.06892561 | 0.07741779 | 0.13028275 | 0.0679405  | 0.05383474 | 0.0565423  | 0.08210837 | 0.09986372 |
| 0.00233201 | 0.00214849 | 0.00407558 | 0.00261579 | 0.00449259 | 0.00096579 | 0.00085214 | 0.0038957  | 0.00114425 |
| 0.00241785 | 0.00286199 | 0.00183882 | 0.00079965 | 0.00225568 | 0.00127078 | 0.00685475 | 0.00291857 | 0.04462977 |
| 0          | 9.19E-05   | 0.00092856 | 0.00011114 | 0.00018766 | 0          | 0          | 0.00011094 | 0.00169254 |
| 0.01446062 | 0.00803036 | 0.00175648 | 0.00055027 | 0.00853103 | 0.02514753 | 0.02629952 | 0.01287117 | 0.01549507 |
| 0.00184558 | 0.00433096 | 0.00427227 | 0          | 0.00275861 | 0.00451935 | 0.00293656 | 0.00580088 | 0.00501404 |
| 0.00380204 | 0.00075347 | 0.00186626 | 0.00107071 | 0.00886507 | 0.00157114 | 0.00114872 | 0          | 0          |
| 0.0239818  | 0.01234333 | 0.02223503 | 0.00967166 | 0.08209759 | 0.01440368 | 0.00672526 | 0.00830983 | 0.00317848 |
| 0.0018885  | 0.00134106 | 0.00246548 | 0.00047979 | 0.00843345 | 0.00186689 | 0.00217213 | 0.00034135 | 0.0001033  |
| 0.00880585 | 0.00445287 | 0.00898367 | 0.0033558  | 0.0168106  | 0.00853962 | 0.00292403 | 0.00109873 | 0.00896727 |
| 0.01334826 | 0.00436893 | 0.00481202 | 0.00020059 | 0.00852353 | 0.00289737 | 0.00446123 | 0.00243001 | 0.005463   |
| 0.09945026 | 0.00910361 | 0.00103376 | 0          | 0.06599259 | 0.09704579 | 0.02264449 | 0.0005419  | 0.08961711 |
| 0.00285063 | 0          | 0          | 0          | 0.00151254 | 0          | 0.00024645 | 0          | 0.00206601 |
| 0.07471735 | 0.02757264 | 0.00071357 | 0          | 0.0378961  | 0.00021719 | 0.00250213 | 0.06437291 | 0.03878932 |
| 0.00044351 | 0.00290996 | 0          | 0          | 0.00034154 | 0.00406187 | 0.00171682 | 0          | 0.00067145 |
| 0.01815535 | 0.15764733 | 0.0155476  | 0.00094331 | 0.11617669 | 0.22502461 | 0.10556985 | 0.00353088 | 0.0422777  |
| 0.01377031 | 0.03873281 | 0.00510477 | 8.67E-05   | 0.04771449 | 0.08067356 | 0.04524303 | 0.00283964 | 0.02313135 |
| 0.00019314 | 0.00057759 | 0          | 0          | 0          | 0.00553597 | 0.00049291 | 0          | 0.00040923 |
| 0.00132696 | 0.0068372  | 0          | 0.00019788 | 0.00336662 | 0.00814222 | 0.00738108 | 0          | 0.00115617 |
| 0.00018241 | 0.00029779 | 0          | 0          | 0.00029275 | 0.00311918 | 0.00240188 | 0          | 0.00042909 |
| 0          | 0.00019986 | 0.00114354 | 0          | 0.00143372 | 0.00102124 | 0.00045949 | 0          | 0.00150183 |
| 0.00327984 | 0.05110013 | 0.00362732 | 0          | 0.02570945 | 0.02918629 | 0.07439974 | 0.00055897 | 0.11525549 |
| 0.0017347  | 0.02013387 | 0.00154149 | 0.00010843 | 0.00050293 | 0.00877992 | 0.00875954 | 0.00021548 | 0.02252347 |
| 0          | 0.00049965 | 0          | 0          | 0.00041661 | 0.00096117 | 0.00186302 | 0          | 0.00113233 |
| 0.00102294 | 0.00182272 | 0          | 0          | 0.00034905 | 0.00786033 | 0.00381794 | 0.00022401 | 0.00256662 |
| 0.00022533 | 0.00045968 | 0.00022871 | 0          | 0          | 0.00281419 | 0.00114455 | 0          | 0.00062378 |
| 0.00349086 | 0.0018487  | 0.00039795 | 0          | 0          | 0.0019131  | 0.00596083 | 0.00024748 | 0.00075091 |
| 0.00353021 | 0.00428499 | 0.00318362 | 0          | 0.00690965 | 0.02174646 | 0.01329178 | 0.00023895 | 0.01673865 |
| 0.00017526 | 0.0004297  | 0          | 0          | 0.00101337 | 0.00150645 | 0.00134923 | 0          | 0.00064761 |
| 0          | 0          | 0          | 0          | 0          | 0          | 0          | 0.00497523 | 0          |
| 0          | 0          | 0          | 0          | 0          | 0          | 0          | 0          | 0          |
| 0.00138061 | 0.00143299 | 0          | 0          | 0          | 0.00230126 | 0          | 0.00011521 | 0.00125152 |
| 0.00076899 | 0          | 0          | 0          | 0.00033028 | 0          | 0.00219302 | 0.00109233 | 0.0027176  |
| 0          | 8.59E-05   | 0          | 0.00031715 | 0          | 0          | 0.00044278 | 0          | 0.00147004 |
| 0          | 9.59E-05   | 0.0005672  | 0.00022499 | 0.00018391 | 0.0002865  | 0.00069341 | 0.00010454 | 0.00229645 |
| 0          | 0.00010193 | 0.00018754 | 0          | 0.0002965  | 0          | 0.00052632 | 0          | 0.00017084 |
| 0          | 8.79E-05   | 0          | 0.00010029 | 0          | 0.0002634  | 0          | 0          | 7.55E-05   |

Table S37. The corresponding LDA value and p value of the biomarkers among CP (n=36), CPR (n=18), and HC (n=72) groups.

| Biomaker_names                                                                                                    | Logarithm value | Groups |
|-------------------------------------------------------------------------------------------------------------------|-----------------|--------|
| d_Bacteria.p__Proteobacteria.c__Betaproteobacteria.o__Burkholderiales.f__Comamonadaceae.g__Delftia                | 0.84509804      |        |
| d_Bacteria.p__Firmicutes.c__Clostridia.o__Clostridiales.f__Lachnospiraceae.g__Blautia                             | 4.759991661     | HC     |
| d_Bacteria.p__Actinobacteria.c__Actinobacteria.o__Actinomycetales.f__Actinomycetaceae.g__Mobiluncus               | 0.599033537     |        |
| d_Bacteria.p__Proteobacteria.c__Gammaproteobacteria.o__Oceanospirillales.f__Halomonadaceae.g__Halomonas           | 3.821766375     | CP     |
| d_Bacteria.p__Bacteroidetes.c__Bacteroidia.o__Bacteroidales.f__Rikenellaceae.g__RC9_gut_group                     | 2.742277692     |        |
| d_Bacteria.p__Firmicutes.c__Clostridia.o__Clostridiales.f__Lachnospiraceae.g__Coprococcus                         | 3.803562376     | HC     |
| d_Bacteria.p__Proteobacteria.c__Gammaproteobacteria.o__Xanthomonadales.f__Xanthomonadaceae.g__Stenotrophomonas    | 0.7224511       |        |
| d_Bacteria.p__Firmicutes.c__Clostridia.o__Clostridiales.f__Family_XI.g__Peptoniphilus                             | 1.017728767     |        |
| d_Bacteria.p__Actinobacteria.c__Actinobacteria.o__Micrococcales.f__Micrococcaceae.g__Nesterenkonia                | 1.313515707     |        |
| d_Bacteria.p__Firmicutes.c__Clostridia.o__Clostridiales.f__Peptococcaceae.g__Peptococcus                          | 1.186815124     |        |
| d_Bacteria.p__Proteobacteria.c__Alphaproteobacteria.o__Rhizobiales.f__Hyphomicrobiaceae.g__Pelagibacterium        | 2.845201431     | CP     |
| d_Bacteria.p__Proteobacteria.c__Alphaproteobacteria.o__Rhodospirillales.f__Rhodospirillaceae.g__Thalassospira     | 2.130065603     |        |
| d_Bacteria.p__Firmicutes.c__Clostridia.o__Clostridiales.f__Ruminococcaceae.g__Hydrogenoanaerobacterium            | 0.929418926     |        |
| d_Bacteria.p__Bacteroidetes.c__Bacteroidia.o__Bacteroidales.f__Porphyromonadaceae.g__Coprobacter                  | 2.516204735     |        |
| d_Bacteria.p__Firmicutes.c__Clostridia.o__Clostridiales.f__Clostridiaceae_1.g__Clostridium_sensu_stricto_1        | 4.170046471     | CPR    |
| d_Bacteria.p__Proteobacteria.c__Gammaproteobacteria.o__Enterobacteriales.f__Enterobacteriaceae.g__Raoultella      | 3.239087356     |        |
| d_Bacteria.p__Verrucomicrobia.c__Verrucomicrobiae.o__Verrucomicrobiales.f__Verrucomicrobiaceae.g__Akkermansia     | 4.981645856     | CP     |
| d_Bacteria.p__Proteobacteria.c__Gammaproteobacteria.o__Pasteurellales.f__Pasteurellaceae.g__Haemophilus           | 2.945632687     |        |
| d_Bacteria.p__Firmicutes.c__Erysipelotrichia.o__Erysipelotrichales.f__Erysipelotrichaceae.g__Asteroleplasma       | 3.49861874      |        |
| d_Bacteria.p__Firmicutes.c__Bacilli.o__Lactobacillales.f__Streptococcaceae.g__Streptococcus                       | 4.750820269     | CP     |
| d_Bacteria.p__Proteobacteria.c__Alphaproteobacteria.o__Rhizobiales.f__Brucellaceae.g__Ochrobactrum                | 0.115795357     |        |
| d_Bacteria.p__Actinobacteria.c__Actinobacteria.o__Bifidobacteriales.f__Bifidobacteriaceae.g__Bifidobacterium      | 4.286178803     | CP     |
| d_Bacteria.p__Proteobacteria.c__Deltaproteobacteria.o__Desulfovibrionales.f__Desulfovibrionaceae.g__Bilophila     | 2.969228185     | HC     |
| d_Bacteria.p__Proteobacteria.c__Deltaproteobacteria.o__Desulfovibrionales.f__Desulfovibrionaceae.g__Desulfovibrio | 3.231763297     |        |
| d_Bacteria.p__Firmicutes.c__Clostridia.o__Clostridiales.f__Lachnospiraceae.g__Cellulosilyticum                    | 1.824993122     |        |
| d_Bacteria.p__Firmicutes.c__Clostridia.o__Clostridiales.f__Ruminococcaceae.g__Ruminococcus                        | 4.063098172     | HC     |
| d_Bacteria.p__Firmicutes.c__Negativicutes.o__Selenomonadales.f__Veillonellaceae.g__Megamonas                      | 4.529171641     | HC     |
| d_Bacteria.p__Firmicutes.c__Negativicutes.o__Selenomonadales.f__Veillonellaceae.g__Dialister                      | 3.793746744     | HC     |
| d_Bacteria.p__Firmicutes.c__Clostridia.o__Clostridiales.f__Christensenellaceae.g__Christensenella                 | 1.897015839     |        |
| d_Bacteria.p__Firmicutes.c__Bacilli.o__Lactobacillales.f__Streptococcaceae.g__Lactococcus                         | 1.028028724     |        |
| d_Bacteria.p__Firmicutes.c__Negativicutes.o__Selenomonadales.f__Veillonellaceae.g__Negativicoccus                 | 1.209366054     |        |
| d_Bacteria.p__Actinobacteria.c__Actinobacteria.o__Corynebacteriales.f__Nocardiaceae.g__Rhodococcus                | 1.269123617     |        |
| d_Bacteria.p__Bacteroidetes.c__Bacteroidia.o__Bacteroidales.f__Prevotellaceae.g__Alloprevotella                   | 3.114777732     |        |
| d_Bacteria.p__Fusobacteria.c__Fusobacteriia.o__Fusobacteriales.f__Fusobacteriaceae.g__Fusobacterium               | 4.559842812     | CPR    |
| d_Bacteria.p__Firmicutes.c__Clostridia.o__Clostridiales.f__Ruminococcaceae.g__Oscillospira                        | 1.671069942     |        |
| d_Bacteria.p__Firmicutes.c__Clostridia.o__Clostridiales.f__Ruminococcaceae.g__Subdoligranulum                     | 5.24292498      |        |
| d_Bacteria.p__Firmicutes.c__Bacilli.o__Lactobacillales.f__Leuconostocaceae.g__Weissella                           | 1.279704958     |        |
| d_Bacteria.p__Proteobacteria.c__Betaproteobacteria.o__Neisseriales.f__Neisseriaceae.g__Neisseria                  | 0.791027515     |        |
| d_Bacteria.p__Firmicutes.c__Negativicutes.o__Selenomonadales.f__Veillonellaceae.g__Anaeroglobus                   | 2.036207347     |        |
| d_Bacteria.p__Firmicutes.c__Clostridia.o__Clostridiales.f__Lachnospiraceae.g__Shuttleworthia                      | 0               |        |
| d_Bacteria.p__Firmicutes.c__Clostridia.o__Clostridiales.f__Ruminococcaceae.g__Flavonifractor                      | 3.690392994     | CPR    |
| d_Bacteria.p__Actinobacteria.c__Actinobacteria.o__Bifidobacteriales.f__Bifidobacteriaceae.g__Gardnerella          | 1.046841872     |        |
| d_Bacteria.p__Firmicutes.c__Clostridia.o__Clostridiales.f__Lachnospiraceae.g__Stomatobaculum                      | 1.321644451     |        |
| d_Bacteria.p__Actinobacteria.c__Actinobacteria.o__Coriobacteriales.f__Coriobacteriaceae.g__Olsenella              | 0.841637508     |        |
| d_Bacteria.p__Actinobacteria.c__Actinobacteria.o__Bifidobacteriales.f__Bifidobacteriaceae.g__Scardovia            | 2.576853037     |        |
| d_Bacteria.p__Firmicutes.c__Negativicutes.o__Selenomonadales.f__Veillonellaceae.g__Mitsuokella                    | 3.028164419     |        |
| d_Bacteria.p__Firmicutes.c__Clostridia.o__Thermoanaerobacteriales.f__Thermoanaerobacteraceae.g__Gelria            | 0.967443966     |        |
| d_Bacteria.p__Firmicutes.c__Bacilli.o__Lactobacillales.f__Leuconostocaceae.g__Leuconostoc                         | 0.987144679     |        |
| d_Bacteria.p__Fusobacteria.c__Fusobacteriia.o__Fusobacteriales.f__Leptotrichiaceae.g__Sneathia                    | 1.106927134     |        |
| d_Bacteria.p__Proteobacteria.c__Betaproteobacteria.o__Burkholderiales.f__Oxalobacteraceae.g__Oxalobacter          | 1.631922672     |        |
| d_Bacteria.p__Actinobacteria.c__Actinobacteria.o__Actinomycetales.f__Actinomycetaceae.g__Actinobaculum            | 0.898542359     |        |
| d_Bacteria.p__Firmicutes.c__Clostridia.o__Clostridiales.f__Lachnospiraceae.g__Johnsonella                         | 0.95558086      |        |
| d_Bacteria.p__Proteobacteria.c__Gammaproteobacteria.o__Enterobacteriales.f__Enterobacteriaceae.g__Citrobacter     | 2.76474676      |        |
| d_Bacteria.p__Firmicutes.c__Erysipelotrichia.o__Erysipelotrichales.f__Erysipelotrichaceae.g__Holdemania           | 2.081137192     | HC     |
| d_Bacteria.p__Firmicutes.c__Erysipelotrichia.o__Erysipelotrichales.f__Erysipelotrichaceae.g__Coprobacillus        | 1.706622969     |        |
| d_Bacteria.p__Actinobacteria.c__Actinobacteria.o__Bifidobacteriales.f__Bifidobacteriaceae.g__Alloscardovia        | 1.903542142     |        |

|                                                                                                               |                 |
|---------------------------------------------------------------------------------------------------------------|-----------------|
| d__Bacteria.p__Firmicutes.c__Clostridia.o__Clostridiales.f__Ruminococcaceae.g__Fastidiosipila                 | 0.793945518     |
| d__Bacteria.p__Proteobacteria.c__Alphaproteobacteria.o__Rhizobiales.f__Phyllobacteriaceae.g__Aquamicrobium    | 0.878266403     |
| d__Bacteria.p__Firmicutes.c__Clostridia.o__Clostridiales.f__Lachnospiraceae.g__Roseburia                      | 4.273170453 HC  |
| d__Bacteria.p__Firmicutes.c__Clostridia.o__Clostridiales.f__Lachnospiraceae.g__Epulopiscium                   | 0.263241435     |
| d__Bacteria.p__Actinobacteria.c__Actinobacteria.o__Coriobacteriales.f__Coriobacteriaceae.g__Adlercreutzia     | 2.169445832     |
| d__Bacteria.p__Actinobacteria.c__Actinobacteria.o__Corynebacteriales.f__Corynebacteriaceae.g__Corynebacterium | 1.123125396     |
| d__Bacteria.p__Firmicutes.c__Clostridia.o__Clostridiales.f__Ruminococcaceae.g__Butyricicoccus                 | 2.385457313     |
| d__Bacteria.p__Synergistetes.c__Synergistia.o__Synergistales.f__Synergistaceae.g__Pyramidobacter              | 1.551585524     |
| d__Bacteria.p__Proteobacteria.c__Alphaproteobacteria.o__Rhizobiales.f__Phyllobacteriaceae.g__Aliihoeflea      | 1.303436065     |
| d__Bacteria.p__Firmicutes.c__Negativicutes.o__Selenomonadales.f__Veillonellaceae.g__Veillonella               | 3.697640962 CP  |
| d__Bacteria.p__Proteobacteria.c__Gammaproteobacteria.o__Pseudomonadales.f__Moraxellaceae.g__Acinetobacter     | 1.035874257     |
| d__Bacteria.p__Firmicutes.c__Negativicutes.o__Selenomonadales.f__Veillonellaceae.g__Allisonella               | 2.190020264     |
| d__Bacteria.p__Proteobacteria.c__Alphaproteobacteria.o__Sphingomonadales.f__Sphingomonadaceae.g__Sphingomonas | 2.375562013 HC  |
| d__Bacteria.p__Firmicutes.c__Clostridia.o__Clostridiales.f__Lachnospiraceae.g__Anaerostipes                   | 4.262309994 CP  |
| d__Bacteria.p__Firmicutes.c__Clostridia.o__Clostridiales.f__Lachnospiraceae.g__Howardella                     | 1.417978858     |
| d__Bacteria.p__Bacteroidetes.c__Bacteroidia.o__Bacteroidales.f__Rikenellaceae.g__Alistipes                    | 4.252954112 CPR |
| d__Bacteria.p__Firmicutes.c__Negativicutes.o__Selenomonadales.f__Acidaminococcaceae.g__Acidaminococcus        | 3.36739734      |
| d__Bacteria.p__Bacteroidetes.c__Bacteroidia.o__Bacteroidales.f__Porphyromonadaceae.g__Porphyromonas           | 2.989474538     |
| d__Bacteria.p__Actinobacteria.c__Actinobacteria.o__Coriobacteriales.f__Coriobacteriaceae.g__Collinsella       | 2.718605475 HC  |
| d__Bacteria.p__Firmicutes.c__Clostridia.o__Clostridiales.f__Eubacteriaceae.g__Anaerofustis                    | 0               |
| d__Bacteria.p__Bacteroidetes.c__Bacteroidia.o__Bacteroidales.f__Bacteroidaceae.g__Bacteroides                 | 5.715402386 CPR |
| d__Bacteria.p__Bacteroidetes.c__Bacteroidia.o__Bacteroidales.f__Bacteroidales_Incertae_Sedis.g__Phocaecicola  | 0.913519515     |
| d__Bacteria.p__Proteobacteria.c__Betaproteobacteria.o__Burkholderiales.f__Alcaligenaceae.g__Sutterella        | 3.63636754      |
| d__Bacteria.p__Actinobacteria.c__Actinobacteria.o__Coriobacteriales.f__Coriobacteriaceae.g__Gordonibacter     | 1.016569101     |
| d__Bacteria.p__Actinobacteria.c__Actinobacteria.o__Micrococcales.f__Microbacteriaceae.g__Pseudoclavibacter    | 0.967443966     |
| d__Bacteria.p__Firmicutes.c__Clostridia.o__Clostridiales.f__Ruminococcaceae.g__Oscillibacter                  | 2.692259241     |
| d__Bacteria.p__Firmicutes.c__Bacilli.o__Bacillales.f__Family_XI.g__Gemella                                    | 2.50242712 CP   |
| d__Bacteria.p__Bacteroidetes.c__Bacteroidia.o__Bacteroidales.f__Porphyromonadaceae.g__Odoribacter             | 2.881059559     |
| d__Bacteria.p__Firmicutes.c__Clostridia.o__Clostridiales.f__Ruminococcaceae.g__Faecalibacterium               | 5.121322197 HC  |
| d__Bacteria.p__Firmicutes.c__Bacilli.o__Lactobacillales.f__Enterococcaceae.g__Enterococcus                    | 4.743887191     |
| d__Bacteria.p__Firmicutes.c__Negativicutes.o__Selenomonadales.f__Veillonellaceae.g__Megasphaera               | 3.827067575     |
| d__Bacteria.p__Firmicutes.c__Clostridia.o__Clostridiales.f__Ruminococcaceae.g__Incertae_Sedis                 | 4.959057963 CP  |
| d__Bacteria.p__Firmicutes.c__Clostridia.o__Clostridiales.f__Lachnospiraceae.g__Butyrivibrio                   | 2.973999674     |
| d__Bacteria.p__Actinobacteria.c__Actinobacteria.o__Bifidobacteriales.f__Bifidobacteriaceae.g__Parascardovia   | 1.372605189     |
| d__Bacteria.p__Bacteroidetes.c__Bacteroidia.o__Bacteroidales.f__Prevotellaceae.g__Prevotella                  | 4.928776092 HC  |
| d__Bacteria.p__Actinobacteria.c__Actinobacteria.o__Coriobacteriales.f__Coriobacteriaceae.g__Slackia           | 0.559308011     |
| d__Bacteria.p__Synergistetes.c__Synergistia.o__Synergistales.f__Synergistaceae.g__Cloacibacillus              | 1.31991534      |
| d__Bacteria.p__Firmicutes.c__Clostridia.o__Clostridiales.f__Lachnospiraceae.g__Oribacterium                   | 2.124486111     |
| d__Bacteria.p__Lentisphaerae.c__Lentisphaeria.o__Victivallales.f__Victivallaceae.g__Victivallis               | 1.211595115     |
| d__Bacteria.p__Bacteroidetes.c__Bacteroidia.o__Bacteroidales.f__Porphyromonadaceae.g__Parabacteroides         | 3.892697371 CPR |
| d__Bacteria.p__Firmicutes.c__Bacilli.o__Lactobacillales.f__Lactobacillaceae.g__Lactobacillus                  | 3.654401174     |
| d__Bacteria.p__Firmicutes.c__Clostridia.o__Clostridiales.f__Peptostreptococcaceae.g__Peptostreptococcus       | 3.500453751     |
| d__Bacteria.p__Actinobacteria.c__Actinobacteria.o__Coriobacteriales.f__Coriobacteriaceae.g__Eggerthella       | 2.171401383     |
| d__Bacteria.p__Firmicutes.c__Erysipelotrichia.o__Erysipelotrichales.f__Erysipelotrichaceae.g__Catenibacterium | 2.357696682     |
| d__Bacteria.p__Proteobacteria.c__Betaproteobacteria.o__Burkholderiales.f__Comamonadaceae.g__Acidovorax        | 0.69655053      |
| d__Bacteria.p__Firmicutes.c__Clostridia.o__Clostridiales.f__Ruminococcaceae.g__Anaerofilum                    | 2.559840153     |
| d__Bacteria.p__Actinobacteria.c__Actinobacteria.o__Micrococcales.f__Micrococcaceae.g__Rothia                  | 4.156824999 CP  |
| d__Bacteria.p__Proteobacteria.c__Gammaproteobacteria.o__Enterobacteriales.f__Enterobacteriaceae.g__Morganella | 1.684121932     |
| d__Bacteria.p__Bacteroidetes.c__Bacteroidia.o__Bacteroidales.f__Porphyromonadaceae.g__Barnesiella             | 3.35059525      |
| d__Bacteria.p__Firmicutes.c__Clostridia.o__Clostridiales.f__Lachnospiraceae.g__Lachnoanaerobaculum            | 2.377640102     |
| d__Bacteria.p__Bacteroidetes.c__Bacteroidia.o__Bacteroidales.f__Porphyromonadaceae.g__Butyricimonas           | 3.171401383     |
| d__Bacteria.p__Firmicutes.c__Clostridia.o__Clostridiales.f__Lachnospiraceae.g__Dorea                          | 3.675607787 CP  |
| d__Bacteria.p__Bacteroidetes.c__Bacteroidia.o__Bacteroidales.f__Prevotellaceae.g__Paraprevotella              | 3.208516002     |
| d__Bacteria.p__Proteobacteria.c__Betaproteobacteria.o__Burkholderiales.f__Alcaligenaceae.g__Achromobacter     | 0.55428721      |
| d__Bacteria.p__Firmicutes.c__Erysipelotrichia.o__Erysipelotrichales.f__Erysipelotrichaceae.g__Solobacterium   | 2.819306251 CP  |
| d__Bacteria.p__Firmicutes.c__Erysipelotrichia.o__Erysipelotrichales.f__Erysipelotrichaceae.g__Allobaculum     | 0.335792102     |
| d__Bacteria.p__Fusobacteria.c__Fusobacteriia.o__Fusobacteriales.f__Leptotrichiaceae.g__Leptotrichia           | 1.224014811     |
| d__Bacteria.p__Firmicutes.c__Clostridia.o__Clostridiales.f__Eubacteriaceae.g__Eubacterium                     | 2.78822731      |

|                                                                                                                         |                 |
|-------------------------------------------------------------------------------------------------------------------------|-----------------|
| d__Bacteria.p__Firmicutes.c__Clostridia.o__Clostridiales.f__Family_XI.g__Anaerococcus                                   | 0.724730866     |
| d__Bacteria.p__Candidate_division_TM7.c__Unknown_Class.o__Unknown_Order.f__Unknown_Family.g__Candidatus_Saccharimonas   | 1.104562977     |
| d__Bacteria.p__Firmicutes.c__Clostridia.o__Clostridiales.f__Lachnospiraceae.g__Pseudobutyrvibrio                        | 4.481859483 HC  |
| d__Bacteria.p__Actinobacteria.c__Actinobacteria.o__Actinomycetales.f__Actinomycetaceae.g__Actinomyces                   | 4.21066773 CP   |
| d__Bacteria.p__Firmicutes.c__Clostridia.o__Clostridiales.f__Ruminococcaceae.g__Anaerotruncus                            | 3.285082        |
| d__Bacteria.p__Proteobacteria.c__Gammaproteobacteria.o__Pasteurellales.f__Pasteurellaceae.g__Aggregatibacter            | 0.402738892     |
| d__Bacteria.p__Firmicutes.c__Clostridia.o__Clostridiales.f__Lachnospiraceae.g__Marvinbryantia                           | 2.604226053 HC  |
| d__Bacteria.p__Firmicutes.c__Clostridia.o__Clostridiales.f__Ruminococcaceae.g__Intestinimonas                           | 3.024827605 CPR |
| d__Bacteria.p__Proteobacteria.c__Gammaproteobacteria.o__Enterobacteriales.f__Enterobacteriaceae.g__Escherichia_Shigella | 5.090831559     |
| d__Bacteria.p__Proteobacteria.c__Gammaproteobacteria.o__Enterobacteriales.f__Enterobacteriaceae.g__Klebsiella           | 3.75026298 HC   |
| d__Bacteria.p__Firmicutes.c__Clostridia.o__Clostridiales.f__Family_XI.g__Finegoldia                                     | 1.638489257     |
| d__Bacteria.p__Tenericutes.c__Mollicutes.o__Anaeroplasmatales.f__Anaeroplasmataceae.g__Anaeroplasmata                   | 2.24448329      |
| d__Bacteria.p__Firmicutes.c__Negativicutes.o__Selenomonadales.f__Acidaminococcaceae.g__Phascolarctobacterium            | 4.433613399 CPR |
| d__Bacteria.p__Proteobacteria.c__Gammaproteobacteria.o__Pseudomonadales.f__Pseudomonadaceae.g__Pseudomonas              | 1.047923552     |
| d__Bacteria.p__Firmicutes.c__Erysipelotrichia.o__Erysipelotrichales.f__Erysipelotrichaceae.g__uncultured                | 4.750953753 HC  |
| d__Bacteria.p__Actinobacteria.c__Actinobacteria.o__Coriobacteriales.f__Coriobacteriaceae.g__Atopobium                   | 3.125806458 CP  |
| d__Bacteria.p__Firmicutes.c__Bacilli.o__Lactobacillales.f__Carnobacteriaceae.g__Granulicatella                          | 2.919775194 CP  |
| d__Bacteria.p__Firmicutes.c__Erysipelotrichia.o__Erysipelotrichales.f__Erysipelotrichaceae.g__Turicibacter              | 2.611664313 CPR |
| d__Bacteria.p__Firmicutes.c__Clostridia.o__Clostridiales.f__Lachnospiraceae.g__Lachnospira                              | 4.166873129 HC  |
| d__Bacteria.p__Firmicutes.c__Bacilli.o__Bacillales.f__Staphylococcaceae.g__Staphylococcus                               | 1.432256456     |
| d__Bacteria.p__Proteobacteria.c__Betaproteobacteria.o__Burkholderiales.f__Alcaligenaceae.g__Parasutterella              | 4.376021061 CPR |
| d__Bacteria.p__Firmicutes.c__Bacilli.o__Lactobacillales.f__Aerococcaceae.g__Abiotrophia                                 | 2.539006361     |
| d__Bacteria.p__Tenericutes.c__Mollicutes.o__RF9.f__norank.g__norank                                                     | 3.354020354     |

| LDA_value  | P_value  |
|------------|----------|
| -          | -        |
| 4.29795615 | 7.02E-07 |
| -          | -        |
| 3.51112508 | 3.09E-25 |
| -          | -        |
| 3.27245479 | 4.99E-05 |
| -          | -        |
| -          | -        |
| -          | -        |
| 3.01899566 | 1.04E-19 |
| -          | -        |
| -          | -        |
| -          | -        |
| 3.82992058 | 6.28E-08 |
| -          | -        |
| 4.61951033 | 0.00335  |
| -          | -        |
| -          | -        |
| 4.46766974 | 2.16E-06 |
| -          | -        |
| 3.96090413 | 9.13E-07 |
| 2.55292515 | 0.00027  |
| -          | -        |
| -          | -        |
| 3.73828006 | 5.59E-09 |
| 4.1749672  | 0.02245  |
| 3.46551742 | 2.47E-05 |
| -          | -        |
| -          | -        |
| -          | -        |
| -          | -        |
| -          | -        |
| 4.35973948 | 0.01114  |
| -          | -        |
| -          | -        |
| -          | -        |
| -          | -        |
| -          | -        |
| 3.21151009 | 0.01257  |
| -          | -        |
| -          | -        |
| -          | -        |
| -          | -        |
| -          | -        |
| -          | -        |
| -          | -        |
| -          | -        |
| -          | -        |
| -          | -        |
| -          | -        |
| 3.09186177 | 9.44E-10 |
| -          | -        |
| -          | -        |

|            |          |
|------------|----------|
| -          |          |
| -          |          |
| 3.89975197 | 9.44E-09 |
| -          |          |
| -          |          |
| -          |          |
| -          |          |
| -          |          |
| -          |          |
| 3.37855566 | 0.0306   |
| -          |          |
| -          |          |
| 2.56953949 | 2.48E-12 |
| 3.9993335  | 5.33E-08 |
| -          |          |
| 3.88318138 | 9.32E-05 |
| -          |          |
| -          |          |
| 2.92713003 | 0.00398  |
| -          |          |
| 5.25163567 | 6.20E-08 |
| -          |          |
| -          |          |
| -          |          |
| -          |          |
| 3.47903035 | 3.28E-07 |
| -          |          |
| 4.69597123 | 1.07E-11 |
| -          |          |
| -          |          |
| 4.4184505  | 0.00013  |
| -          |          |
| -          |          |
| 4.58844205 | 0.00231  |
| -          |          |
| -          |          |
| -          |          |
| -          |          |
| 3.43588827 | 2.34E-05 |
| -          |          |
| -          |          |
| -          |          |
| -          |          |
| -          |          |
| -          |          |
| 3.87182422 | 3.65E-09 |
| -          |          |
| -          |          |
| -          |          |
| -          |          |
| 3.36282093 | 2.71E-05 |
| -          |          |
| -          |          |
| 3.24254303 | 1.09E-08 |
| -          |          |
| -          |          |
| -          |          |

|            |          |
|------------|----------|
| -          |          |
| -          |          |
| 4.10081996 | 1.72E-08 |
| 3.91399179 | 1.23E-05 |
| -          |          |
| -          |          |
| 2.84962125 | 1.94E-05 |
| 2.77290862 | 0.00093  |
| -          |          |
| 3.4698756  | 5.32E-05 |
| -          |          |
| -          |          |
| 4.13436685 | 0.00102  |
| -          |          |
| 4.30515473 | 1.03E-05 |
| 3.18892753 | 6.74E-07 |
| 3.11982614 | 1.16E-09 |
| 2.50110957 | 1.02E-06 |
| 3.8463267  | 2.75E-15 |
| -          |          |
| 3.99480537 | 3.02E-05 |
| -          |          |
| -          |          |

**Table S38. Number of lipid subclass and corresponding lipid molecules.**

| Lipid_Sub_Classes | Lipid_Molecules_Number | Category             |
|-------------------|------------------------|----------------------|
| Cer               | 17                     | Sphingolipids        |
| CerG1             | 5                      | Saccharolipids       |
| CerG2             | 7                      | Saccharolipids       |
| CerG3             | 3                      | Saccharolipids       |
| CerG3GNAc1        | 2                      | Saccharolipids       |
| ChE               | 14                     | Sterol Lipids        |
| CL                | 2                      | Glycerophospholipids |
| Co                | 1                      | Prenol Lipids        |
| DG                | 25                     | Glycerolipids        |
| dMePE             | 22                     | Glycerophospholipids |
| GM3               | 9                      | Sphingolipids        |
| LdMePE            | 4                      | Glycerophospholipids |
| LPA               | 1                      | Glycerophospholipids |
| LPC               | 40                     | Glycerophospholipids |
| LPE               | 6                      | Glycerophospholipids |
| LPG               | 1                      | Glycerophospholipids |
| LPI               | 5                      | Glycerophospholipids |
| MG                | 7                      | Glycerolipids        |
| MGDG              | 1                      | Saccharolipids       |
| MGMG              | 1                      | Saccharolipids       |
| OAHFA             | 4                      | Fatty Acyls          |
| PA                | 2                      | Glycerophospholipids |
| PC                | 232                    | Glycerophospholipids |
| PE                | 78                     | Glycerophospholipids |
| PEt               | 1                      | Glycerophospholipids |
| PG                | 4                      | Glycerophospholipids |
| phSM              | 2                      | Sphingolipids        |
| PI                | 39                     | Glycerophospholipids |
| PS                | 13                     | Glycerophospholipids |
| SiE               | 2                      | Sterol Lipids        |
| SM                | 62                     | Sphingolipids        |
| TG                | 195                    | Glycerolipids        |
| ZyE               | 1                      | Sterol Lipids        |

**Table S39. The average abundance and composition at the subclass level in CP (n=73), CPR (n=22) groups.**

| ID         | CP          | CPR         |
|------------|-------------|-------------|
| PC         | 0.471973736 | 0.465428609 |
| TG         | 0.330293065 | 0.347685188 |
| SM         | 0.087396139 | 0.086344893 |
| LPC        | 0.062756328 | 0.055604423 |
| ChE        | 0.017719478 | 0.013840309 |
| PE         | 0.011495475 | 0.012263964 |
| DG         | 0.004180555 | 0.004445526 |
| PI         | 0.003933273 | 0.00410904  |
| PS         | 0.003356527 | 0.003232655 |
| Cer        | 0.002989476 | 0.003292065 |
| PA         | 0.001443582 | 0.0013947   |
| CerG1      | 5.91E-04    | 7.27E-04    |
| LPE        | 5.64E-04    | 5.00E-04    |
| CerG2      | 3.73E-04    | 3.16E-04    |
| MG         | 1.42E-04    | 1.10E-04    |
| CerG3      | 1.11E-04    | 1.05E-04    |
| GM3        | 1.05E-04    | 1.07E-04    |
| SiE        | 1.35E-04    | 6.76E-05    |
| dMePE      | 9.88E-05    | 1.02E-04    |
| LdMePE     | 9.60E-05    | 8.28E-05    |
| Co         | 7.60E-05    | 8.91E-05    |
| CerG3GNAc1 | 5.31E-05    | 5.02E-05    |
| OAHA       | 3.19E-05    | 2.42E-05    |
| LPI        | 2.64E-05    | 2.48E-05    |
| ZyE        | 2.22E-05    | 2.06E-05    |
| phSM       | 1.17E-05    | 1.11E-05    |
| PG         | 1.28E-05    | 9.96E-06    |
| CL         | 6.53E-06    | 6.83E-06    |
| LPG        | 2.11E-06    | 1.71E-06    |
| PEt        | 1.45E-06    | 6.90E-07    |
| MGMG       | 9.37E-07    | 1.01E-06    |
| LPA        | 1.46E-06    | 3.32E-07    |
| MGDG       | 6.64E-07    | 7.88E-07    |

**Table S39. The average abundance and composition at the subclass level in SP (n=30), SPR (n=30) groups.**

| ID         | SP          | SPR         |
|------------|-------------|-------------|
| PC         | 0.522349583 | 0.482277677 |
| TG         | 0.244221389 | 0.305960245 |
| SM         | 0.119705904 | 0.095915372 |
| LPC        | 0.060474938 | 0.068451704 |
| ChE        | 0.024844904 | 0.019027885 |
| PE         | 0.0113236   | 0.010459514 |
| PI         | 0.003576299 | 0.003838511 |
| PS         | 0.003557895 | 0.003407352 |
| Cer        | 0.002961602 | 0.003043036 |
| DG         | 0.002310376 | 0.003365781 |
| PA         | 0.001553941 | 0.00148063  |
| CerG1      | 7.66E-04    | 7.94E-04    |
| LPE        | 4.47E-04    | 5.56E-04    |
| CerG2      | 5.21E-04    | 4.04E-04    |
| MG         | 2.49E-04    | 1.75E-04    |
| CerG3      | 2.08E-04    | 1.22E-04    |
| GM3        | 1.82E-04    | 1.34E-04    |
| SiE        | 1.73E-04    | 1.17E-04    |
| dMePE      | 1.36E-04    | 1.05E-04    |
| LdMePE     | 8.50E-05    | 1.03E-04    |
| Co         | 8.92E-05    | 8.82E-05    |
| CerG3GNAc1 | 9.35E-05    | 6.49E-05    |
| OAHA       | 5.73E-05    | 2.90E-05    |
| LPI        | 4.02E-05    | 2.14E-05    |
| ZyE        | 2.82E-05    | 2.49E-05    |
| phSM       | 1.85E-05    | 1.41E-05    |
| PG         | 1.23E-05    | 8.47E-06    |
| CL         | 7.32E-06    | 7.00E-06    |
| LPG        | 1.84E-06    | 1.71E-06    |
| PEt        | 1.11E-06    | 7.83E-07    |
| MGMG       | 9.54E-07    | 6.40E-07    |
| LPA        | 1.01E-06    | 5.57E-07    |
| MGDG       | 4.47E-07    | 5.94E-07    |

Table S40. The relative abundance and distribution of the key 169 lipid molecule in CP (n=73), CPR (n=22) groups.

|                         | CP_01       | CP_02       | CP_03       | CP_04       | CP_05       | CP_06       | CP_07       | CP_08       | CP_09       |
|-------------------------|-------------|-------------|-------------|-------------|-------------|-------------|-------------|-------------|-------------|
| TG(67:3)                | 0.003938987 | 0.006618245 | 0.003375013 | 0.000639702 | 0.004805751 | 0.004085663 | 0.009460377 | 0.005655707 | 0.006542743 |
| TG(29:0/18:1/18:3)      | 0.004138359 | 0.00465381  | 0.003859268 | 0.002046077 | 0.004137914 | 0.003488222 | 0.005815593 | 0.005938782 | 0.005145647 |
| TG(29:0/18:1/18:1)      | 0.004603141 | 0.005139983 | 0.003627926 | 0.001286371 | 0.003960476 | 0.003689035 | 0.005375278 | 0.00821814  | 0.005448955 |
| TG(29:0/18:1/18:2)      | 0.003931985 | 0.004801943 | 0.003590963 | 0.000921319 | 0.004124678 | 0.003214844 | 0.005897461 | 0.005118925 | 0.004987274 |
| TG(18:1/22:1/23:0)      | 0.004612573 | 0.005664155 | 0.004254812 | 0.001703909 | 0.003555498 | 0.003390561 | 0.005036352 | 0.004147919 | 0.005043566 |
| TG(29:0/16:0/18:1)      | 0.005534985 | 0.005417868 | 0.004262279 | 0.00146263  | 0.004249419 | 0.003070267 | 0.005037344 | 0.004558535 | 0.005513629 |
| TG(16:0/22:1/24:0)      | 0.004485672 | 0.007922678 | 0.00355544  | 0.001439413 | 0.004426783 | 0.007325683 | 0.005479832 | 0.004075588 | 0.006605746 |
| TG(27:0/16:0/18:1)      | 0.005510394 | 0.007161208 | 0.004170911 | 0.001668593 | 0.00342797  | 0.005079905 | 0.005445491 | 0.003061404 | 0.005663697 |
| TG(30:0/18:1/20:1)      | 0.005207515 | 0.006305753 | 0.003990301 | 0.000886695 | 0.005516901 | 0.002951884 | 0.007405546 | 0.006321929 | 0.016686575 |
| TG(18:1/22:0/24:0)      | 0.004651911 | 0.007358204 | 0.004082673 | 0.001221253 | 0.005504677 | 0.002191388 | 0.005919808 | 0.005141172 | 0.008487027 |
| TG(18:1/24:0/24:0)      | 0.00473261  | 0.006964436 | 0.003433365 | 0.000709022 | 0.006975147 | 0.001961486 | 0.00687661  | 0.00585676  | 0.008280707 |
| TG(16:0e/18:1/22:1)     | 0.005686641 | 0.006450747 | 0.005591466 | 0.002125301 | 0.001824346 | 0.004259008 | 0.005388721 | 0.002757921 | 0.004158514 |
| TG(18:0p/16:0/22:1)     | 0.003927349 | 0.006682917 | 0.005782931 | 0.002270938 | 0.002138385 | 0.004393974 | 0.005647592 | 0.002740149 | 0.004291754 |
| TG(22:1/18:2/23:1)      | 0.006989868 | 0.004986329 | 0.007503122 | 0.001148163 | 0.001114142 | 0.003464532 | 0.016184267 | 0.002301848 | 0.01073416  |
| TG(16:0/18:1/23:1)(rep) | 0.007421804 | 0.006900245 | 0.008765495 | 0.003968059 | 0.004156349 | 0.003061803 | 0.0125223   | 0.00563992  | 0.006629972 |
| TG(18:0/18:1/24:0)      | 0.005044952 | 0.008625025 | 0.004124495 | 0.002032006 | 0.004189242 | 0.002005883 | 0.006096455 | 0.003162133 | 0.007261625 |
| TG(25:0/16:0/18:1)      | 0.006419414 | 0.009995961 | 0.005202422 | 0.002434581 | 0.003253159 | 0.002164412 | 0.006169326 | 0.003343533 | 0.008573586 |
| TG(16:0/18:1/23:0)      | 0.005640158 | 0.009790564 | 0.005678746 | 0.003545888 | 0.002349097 | 0.002779746 | 0.005497402 | 0.003041575 | 0.009470997 |
| TG(59:1)                | 0.005678451 | 0.012799177 | 0.004949019 | 0.003424843 | 0.003028567 | 0.002281307 | 0.005653286 | 0.003115634 | 0.006454791 |
| TG(16:0/18:1/22:0)      | 0.005606839 | 0.009160818 | 0.004555896 | 0.003448488 | 0.002828122 | 0.001651708 | 0.004971654 | 0.003124676 | 0.00667804  |
| TG(16:0/18:1/24:0)      | 0.005336547 | 0.009355314 | 0.004661694 | 0.002616569 | 0.003394422 | 0.001615833 | 0.005919959 | 0.003222671 | 0.006746041 |
| TG(18:0/18:1/21:0)      | 0.009672873 | 0.007594766 | 0.010749724 | 0.00791682  | 0.002232323 | 0.00178628  | 0.005745564 | 0.002588948 | 0.007950838 |
| TG(19:0/18:1/18:1)      | 0.009017221 | 0.006071161 | 0.007707625 | 0.008275755 | 0.003977724 | 0.00248048  | 0.005867025 | 0.002912495 | 0.010709664 |
| TG(18:1/18:2/23:1)      | 0.004366643 | 0.010123737 | 0.010584464 | 0.002318452 | 0.005949915 | 0.007477002 | 0.013146566 | 0.008319691 | 0.007098095 |
| TG(18:2/18:2/21:0)      | 0.004506287 | 0.006749554 | 0.004506672 | 0.002967821 | 0.006429166 | 0.008090183 | 0.017273359 | 0.008013903 | 0.005438333 |
| TG(25:1/18:1/18:2)      | 0.006699516 | 0.008436727 | 0.005996836 | 0.00229964  | 0.005417623 | 0.004649758 | 0.024057576 | 0.005877728 | 0.006021075 |
| TG(25:0/18:1/18:2)      | 0.00500826  | 0.008009064 | 0.004905989 | 0.002375468 | 0.002376839 | 0.003446413 | 0.008625849 | 0.002475268 | 0.004277932 |
| TG(18:1/18:1/21:1)(rep) | 0.004247495 | 0.008201546 | 0.005042334 | 0.003098478 | 0.004252563 | 0.004805102 | 0.011222876 | 0.005349403 | 0.005397655 |
| TG(18:0/18:1/23:1)      | 0.003976561 | 0.007740114 | 0.003162161 | 0.003114635 | 0.004352651 | 0.005469413 | 0.011055056 | 0.003898663 | 0.00188305  |
| PE(20:1/18:1)           | 0.005831748 | 0.009199166 | 0.013734159 | 0.004475409 | 0.003978853 | 0.004661175 | 0.005770336 | 0.004213238 | 0.003801534 |
| PE(18:3/18:2)           | 0.003156302 | 0.011834088 | 0.006547326 | 0.00147494  | 0.002571596 | 0.004146117 | 0.00513401  | 0.003277896 | 0.002692357 |
| PE(36:5)                | 0.003450279 | 0.01215464  | 0.006668442 | 0.001807525 | 0.002425608 | 0.004417705 | 0.005364801 | 0.003258302 | 0.002708157 |
| TG(30:0/18:2/18:2)      | 0.0046337   | 0.005366507 | 0.003862801 | 0.000529096 | 0.003683778 | 0.002140918 | 0.008548789 | 0.004521309 | 0.007145793 |
| TG(30:0/18:1/18:1)      | 0.004704046 | 0.006643097 | 0.004625884 | 0.001270901 | 0.004586455 | 0.002595735 | 0.007028949 | 0.005142957 | 0.007990081 |
| TG(30:0/18:1/18:2)      | 0.004405186 | 0.005444349 | 0.004917051 | 0.0007024   | 0.004652922 | 0.002760382 | 0.007699711 | 0.005373831 | 0.007385686 |
| TG(18:1/18:1/23:0)      | 0.007692324 | 0.008768649 | 0.009670254 | 0.002242006 | 0.002933456 | 0.003751767 | 0.00615185  | 0.002668035 | 0.006661486 |
| TG(25:0/18:1/18:1)      | 0.004749464 | 0.007811191 | 0.003894732 | 0.001731462 | 0.005543523 | 0.003792701 | 0.005221283 | 0.003107215 | 0.005616698 |
| TG(18:1/22:1/23:1)      | 0.003959274 | 0.005522128 | 0.00378805  | 0.001611629 | 0.003920454 | 0.004244667 | 0.005391501 | 0.003713275 | 0.003837233 |
| TG(18:1/22:1/24:1)      | 0.004072542 | 0.005287677 | 0.004047265 | 0.001919492 | 0.003627582 | 0.004350955 | 0.005126617 | 0.004072496 | 0.004550629 |
| TG(26:0/18:1/18:2)      | 0.003795774 | 0.005615855 | 0.003821368 | 0.002511489 | 0.003558663 | 0.004916027 | 0.004869269 | 0.003285735 | 0.004011905 |
| TG(18:1/22:1/24:0)      | 0.004489165 | 0.006492203 | 0.004407732 | 0.001723512 | 0.004039142 | 0.002955385 | 0.005472479 | 0.004378064 | 0.005776238 |
| TG(26:0/18:1/18:1)      | 0.004197403 | 0.006734112 | 0.003743523 | 0.002212739 | 0.003580537 | 0.00568671  | 0.005311721 | 0.0033332   | 0.004372901 |
| TG(22:1/18:2/22:1)      | 0.005902643 | 0.004329662 | 0.005165043 | 0.001687705 | 0.003479463 | 0.003621696 | 0.005516376 | 0.00402239  | 0.005424987 |
| TG(18:1/18:2/24:1)      | 0.004434789 | 0.008624599 | 0.004254852 | 0.001848012 | 0.003501642 | 0.003028663 | 0.006302614 | 0.003514425 | 0.004350392 |
| TG(60:3)                | 0.003978894 | 0.006392269 | 0.004213479 | 0.002625521 | 0.002974111 | 0.002847339 | 0.005243514 | 0.003450932 | 0.005405009 |
| DG(18:1/22:0)           | 0.006416319 | 0.006639263 | 0.005548402 | 0.00569736  | 0.003482998 | 0.00192944  | 0.004902442 | 0.002765997 | 0.005096774 |
| TG(24:1/18:1/22:1)      | 0.003949737 | 0.007830144 | 0.003985271 | 0.002500972 | 0.003339419 | 0.002608097 | 0.005262703 | 0.00308096  | 0.004771567 |
| TG(16:0/18:1/24:1)      | 0.004615639 | 0.007703448 | 0.004322366 | 0.003030425 | 0.003063152 | 0.002008909 | 0.005046222 | 0.002872658 | 0.00511806  |
| TG(18:1/18:1/24:0)      | 0.004339036 | 0.00770465  | 0.004445543 | 0.002473986 | 0.003543748 | 0.002457885 | 0.005564901 | 0.003115175 | 0.005527997 |
| TG(16:0/18:1/22:1)      | 0.004382606 | 0.006420729 | 0.004993186 | 0.00418986  | 0.003027039 | 0.00409742  | 0.00415258  | 0.002749611 | 0.004778305 |
| TG(59:2)                | 0.00422923  | 0.012692247 | 0.004697207 | 0.003401208 | 0.003715599 | 0.003198651 | 0.00475474  | 0.003250094 | 0.004370036 |
| TG(24:0/18:2/20:4)      | 0.00468247  | 0.005982241 | 0.002766194 | 0.002696295 | 0.005134994 | 0.002563132 | 0.009826665 | 0.007298997 | 0.00648076  |
| TG(24:1/18:2/22:1)      | 0.003468492 | 0.005615243 | 0.006575224 | 0.002256038 | 0.004242585 | 0.003571288 | 0.005300309 | 0.004346568 | 0.005133455 |
| TG(18:1/18:1/22:4)      | 0.005272559 | 0.002259219 | 0.004384639 | 0.008108008 | 0.006254956 | 0.003313483 | 0.004434473 | 0.007247435 | 0.007566951 |
| TG(24:5/18:1/18:1)      | 0.002905946 | 0.002908875 | 0.00298346  | 0.004491551 | 0.006149953 | 0.00405286  | 0.003381412 | 0.015676025 | 0.007439944 |
| DG(18:1/22:1)           | 0.004063762 | 0.006527148 | 0.004022187 | 0.005774764 | 0.002882686 | 0.003119083 | 0.003711259 | 0.001930193 | 0.003130893 |
| DG(22:1/18:2)           | 0.004885602 | 0.004234349 | 0.00439142  | 0.005987403 | 0.004389361 | 0.00339695  | 0.00484438  | 0.003221258 | 0.00410487  |
| TG(24:1/18:2/18:3)      | 0.003449954 | 0.003833217 | 0.002541611 | 0.0041501   | 0.004703605 | 0.003037299 | 0.004305894 | 0.008471322 | 0.006105294 |
| TG(24:4/16:0/18:1)      | 0.004197441 | 0.004161385 | 0.003717972 | 0.004883773 | 0.004448323 | 0.003500323 | 0.004369513 | 0.004924577 | 0.004983541 |
| TG(20:0/18:1/18:2)      | 0.003836993 | 0.005752295 | 0.004711071 | 0.004286631 | 0.004191494 | 0.003640574 | 0.004139304 | 0.003611364 | 0.004582928 |
| TG(18:1/18:2/22:0)      | 0.00364625  | 0.006740431 | 0.003899068 | 0.002984321 | 0.003276262 | 0.00294389  | 0.004407566 | 0.002925776 | 0.004019516 |
| TG(18:1/18:2/22:1)      | 0.003290528 | 0.006722849 | 0.003571831 | 0.002149983 | 0.003785693 | 0.003476119 | 0.005183165 | 0.003515761 | 0.003714463 |
| TG(18:3/22:1/22:1)      | 0.004022309 | 0.008347414 | 0.004325889 | 0.002956995 | 0.004224382 | 0.003930633 | 0.006199138 | 0.004708534 | 0.004579602 |
| TG(24:0/18:2/18:3)      | 0.002996021 | 0.005201826 | 0.0043628   | 0.002508893 | 0.005362345 | 0.003384822 | 0.006838725 | 0.004946867 | 0.005775812 |
| DG(20:0/18:1)           | 0.007613071 | 0.005437728 | 0.007888648 | 0.003057953 | 0.003057953 | 0.002126031 | 0.003408227 | 0.002131733 | 0.004709897 |
| DG(20:1/18:1)           | 0.008170325 | 0.006052037 | 0.006832817 | 0.009554377 | 0.004144917 | 0.003322467 | 0.005034101 | 0.003046817 | 0.005257969 |
| DG(18:3/22:1)           | 0.009414466 | 0.005063656 | 0.005102154 | 0.01250533  | 0.005553014 | 0.002371602 | 0.005462808 | 0.005202756 | 0.007391219 |
| DG(20:1/18:2)           | 0.008232345 | 0.004919333 | 0.007934626 | 0.012292431 | 0.005736538 | 0.004048111 | 0.007362922 | 0.004438664 | 0.008379726 |
| TG(18:1/18:1/18:1)(rep) | 0.003987059 | 0.004332607 | 0.005805021 | 0.001492578 | 0.004644494 | 0.003506419 | 0.005348559 | 0.0042754   | 0.005759941 |
| TG(19:1/18:1/18:1)      | 0.005239728 | 0.004538888 | 0.00463709  | 0.006253713 | 0.005153727 | 0.003606832 | 0.005106267 | 0.005586939 | 0.011364327 |
| TG(20:1/18:1/18:2)      | 0.003475848 | 0.004437446 | 0.003449217 | 0.004740315 | 0.00529082  | 0.00418688  | 0.004016858 | 0.006159597 | 0.005426841 |
| PC(36:5p)               | 0.00174636  | 0.005888264 | 0.005993501 | 0.003890046 | 0.001681157 | 0.008434157 | 0.006692687 | 0.006143344 | 0.00336717  |
| PC(39:5)                | 0.000575822 | 0.005815528 | 0.0046729   |             |             |             |             |             |             |

|                            |             |             |             |             |             |             |             |             |             |
|----------------------------|-------------|-------------|-------------|-------------|-------------|-------------|-------------|-------------|-------------|
| PC(33:2p)                  | 0.002170994 | 0.004746774 | 0.003866964 | 0.00473973  | 0.00096754  | 0.006731925 | 0.004181976 | 0.002008157 | 0.001660719 |
| PC(39:7p)                  | 0.001302949 | 0.003930863 | 0.005313662 | 0.008184008 | 0.001327181 | 0.011271424 | 0.006894636 | 0.002534866 | 0.001597642 |
| PC(38:6p)                  | 0.004146747 | 0.004073959 | 0.003626178 | 0.009075468 | 0.001919539 | 0.003672195 | 0.003930472 | 0.004322736 | 0.001857705 |
| PC(40:8p)                  | 0.001845962 | 0.003458168 | 0.002140713 | 0.006110131 | 0.00207209  | 0.0063378   | 0.006203067 | 0.001873354 | 0.001318681 |
| PE(16:0p/20:5)             | 0.004446793 | 0.011300809 | 0.00649466  | 0.008649985 | 0.001518831 | 0.002348068 | 0.004379334 | 0.00370409  | 0.001688801 |
| PE(16:0p/20:5)(rep)        | 0.004191135 | 0.011136692 | 0.007551519 | 0.009896106 | 0.001419087 | 0.002521098 | 0.004537315 | 0.003377751 | 0.001593195 |
| PC(32:1p)                  | 0.004643825 | 0.009083542 | 0.005058897 | 0.002302592 | 0.000531869 | 0.004546147 | 0.001528164 | 0.003266382 | 0.002322569 |
| PC(33:1p)                  | 0.004366922 | 0.010811593 | 0.005248548 | 0.003721657 | 0.000324523 | 0.003469002 | 0.001286457 | 0.002841781 | 0.003290128 |
| PC(36:4p)                  | 0.008903493 | 0.007635962 | 0.003190183 | 0.009227734 | 0.002109665 | 0.003383073 | 0.000872442 | 0.002176004 | 0.001541025 |
| PC(14:0e/20:4)             | 0.00588277  | 0.006626146 | 0.003254585 | 0.008661917 | 0.002340527 | 0.003877574 | 0.001508537 | 0.002167911 | 0.001947636 |
| PC(34:3p)                  | 0.005467751 | 0.005613396 | 0.003091998 | 0.010786477 | 0.00203653  | 0.004120724 | 0.002505162 | 0.002831841 | 0.001921255 |
| TG(16:0/14:0/16:0)         | 0.010799297 | 0.005259293 | 0.007371573 | 0.009311065 | 0.002700078 | 0.002480753 | 0.00274331  | 0.00313696  | 0.006734616 |
| TG(14:0/14:0/18:2)         | 0.016089253 | 0.005444575 | 0.010998278 | 0.013182613 | 0.002989316 | 0.001374981 | 0.004510629 | 0.003257067 | 0.009994903 |
| TG(16:0/14:0/16:1)         | 0.013636061 | 0.005245778 | 0.011611669 | 0.013907321 | 0.002511867 | 0.002045582 | 0.003096599 | 0.002809157 | 0.007574245 |
| TG(14:0/14:0/18:3)         | 0.017566736 | 0.006617657 | 0.009810545 | 0.011959309 | 0.003518484 | 0.001537078 | 0.004928994 | 0.002844569 | 0.010687374 |
| TG(16:0/10:0/18:2)         | 0.017581678 | 0.005933597 | 0.00827132  | 0.012595054 | 0.002734188 | 0.002465142 | 0.004440004 | 0.00239052  | 0.011078691 |
| TG(15:0/12:0/18:1)         | 0.015632305 | 0.004703467 | 0.008009646 | 0.016084352 | 0.00225985  | 0.002559685 | 0.002955601 | 0.002424399 | 0.009531418 |
| TG(16:0/9:0/18:1)          | 0.015330127 | 0.007605437 | 0.008985797 | 0.01400687  | 0.001450903 | 0.00223124  | 0.003698222 | 0.002253489 | 0.009748475 |
| TG(18:0/10:0/18:2)         | 0.014892803 | 0.005902302 | 0.00808163  | 0.011003699 | 0.002456114 | 0.001208798 | 0.004339874 | 0.002908373 | 0.01000909  |
| TG(44:1)                   | 0.014150898 | 0.005207227 | 0.008936668 | 0.012398175 | 0.002354777 | 0.001513245 | 0.003870943 | 0.002183179 | 0.009731847 |
| TG(16:0/10:0/18:1)         | 0.015095793 | 0.005492095 | 0.009725095 | 0.013727178 | 0.002589481 | 0.001661068 | 0.003652852 | 0.002740876 | 0.009175964 |
| TG(16:0/8:0/18:1)          | 0.01481691  | 0.005863084 | 0.008822568 | 0.01271128  | 0.002798482 | 0.001525657 | 0.003912231 | 0.002470658 | 0.009570372 |
| TG(16:0/14:0/14:0)         | 0.011304204 | 0.004792617 | 0.008156313 | 0.012073712 | 0.002017145 | 0.002241519 | 0.00357588  | 0.002560729 | 0.008513819 |
| TG(42:0)                   | 0.012978442 | 0.004758508 | 0.00741748  | 0.011882577 | 0.00242115  | 0.00304897  | 0.003451827 | 0.00293175  | 0.010055588 |
| TG(16:0/10:0/14:0)         | 0.013723671 | 0.0050741   | 0.009341179 | 0.012590112 | 0.002406412 | 0.003417488 | 0.003951696 | 0.002672789 | 0.010494965 |
| TG(16:0/12:0/14:0)         | 0.013560534 | 0.00526409  | 0.00847579  | 0.013403924 | 0.002162329 | 0.002089077 | 0.004078047 | 0.002934919 | 0.010092549 |
| TG(16:0/18:2/18:2)(rep)    | 0.00402112  | 0.00278003  | 0.015966597 | 0.004876813 | 0.003491239 | 0.002918366 | 0.005732901 | 0.004325394 | 0.004158541 |
| PC(36:5)(rep)(rep)         | 0.009475951 | 0.003131516 | 0.004387202 | 0.012726766 | 0.006472102 | 0.004093007 | 0.000848119 | 0.002773836 | 0.003937169 |
| PC(38:6)                   | 0.004978743 | 0.002514565 | 0.009741386 | 0.006330811 | 0.003591941 | 0.003028351 | 0.003008976 | 0.002681274 | 0.0039431   |
| ChE(18:3)(rep)             | 0.002920063 | 0.002488126 | 0.004593609 | 0.002844881 | 0.00976443  | 0.010462866 | 0.002231297 | 0.009856874 | 0.002425965 |
| TG(18:0/16:0/16:0)         | 0.004228154 | 0.004625541 | 0.005722676 | 0.008155648 | 0.014139275 | 0.011337146 | 0.004521295 | 0.023480918 | 0.003303813 |
| ChE(22:6)                  | 0.00115874  | 0.004025406 | 0.002559627 | 0.004438008 | 0.006333976 | 0.017732029 | 0.004667931 | 0.007858262 | 0.002068281 |
| SM(d44:6)                  | 0.001704785 | 0.002893083 | 0.001928246 | 0.004356782 | 0.014035317 | 0.014441932 | 0.007175329 | 0.017810647 | 0.003559525 |
| TG(18:1/18:1/19:2)         | 0.002482152 | 0.004324336 | 0.003368817 | 0.004331624 | 0.010956613 | 0.018761357 | 0.006123835 | 0.013764679 | 0.004172778 |
| ChE(18:0)                  | 0.004524641 | 0.002748323 | 0.002250195 | 0.005070603 | 0.010205897 | 0.009547492 | 0.006932958 | 0.013508098 | 0.008725135 |
| ChE(16:0)                  | 0.002960593 | 0.002641416 | 0.001955051 | 0.003481101 | 0.009243294 | 0.017881494 | 0.009014465 | 0.016948438 | 0.005433387 |
| ChE(18:1)                  | 0.003750315 | 0.002781274 | 0.002028345 | 0.003294932 | 0.013492717 | 0.016158329 | 0.005237827 | 0.014257634 | 0.004573523 |
| TG(18:0/16:0/16:0)         | 0.001774772 | 0.002532275 | 0.004685963 | 0.002217035 | 0.010272777 | 0.009093222 | 0.007618671 | 0.01523785  | 0.005034921 |
| TG(20:0/16:0/16:0)         | 0.00244718  | 0.002203496 | 0.00620728  | 0.003602756 | 0.009005463 | 0.009603587 | 0.006445715 | 0.012078367 | 0.007016441 |
| TG(18:1/18:2/22:5)         | 0.002474129 | 0.004895634 | 0.003113847 | 0.001892369 | 0.009877392 | 0.007989584 | 0.012134784 | 0.017299628 | 0.004960143 |
| ChE(20:1)                  | 0.003310441 | 0.00557435  | 0.002168795 | 0.004537503 | 0.013690388 | 0.018039592 | 0.004238998 | 0.014543321 | 0.004775354 |
| SiE(18:1)                  | 0.003891095 | 0.003712054 | 0.003193162 | 0.003897552 | 0.012881075 | 0.016709721 | 0.005379005 | 0.013701543 | 0.004972565 |
| ChE(18:2)(rep)(rep)        | 0.00206212  | 0.004127144 | 0.002597162 | 0.002329434 | 0.006741595 | 0.018994202 | 0.004916409 | 0.0176849   | 0.003431345 |
| ChE(20:2)                  | 0.002367792 | 0.004645307 | 0.003686829 | 0.002244266 | 0.00752047  | 0.015141189 | 0.006330098 | 0.015779317 | 0.00420987  |
| SiE(18:2)                  | 0.001777316 | 0.005339717 | 0.00371014  | 0.002074604 | 0.007697384 | 0.016118292 | 0.005970853 | 0.016136395 | 0.00437263  |
| PC(18:1/22:6)              | 0.002927406 | 0.003081588 | 0.00594814  | 0.008767652 | 0.016228433 | 0.01259716  | 0.005545755 | 0.005090271 | 0.003208836 |
| PC(40:7)(rep)(rep)         | 0.004373412 | 0.010437365 | 0.004883326 | 0.007470583 | 0.014139109 | 0.009718688 | 0.003329507 | 0.011044041 | 0.00648541  |
| PC(35:2)                   | 0.002347174 | 0.002997673 | 0.004667809 | 0.003479427 | 0.00399828  | 0.019182166 | 0.012295149 | 0.008661002 | 0.010074191 |
| PC(39:4e)                  | 0.002459579 | 0.00459868  | 0.002853015 | 0.003987605 | 0.002778579 | 0.006153719 | 0.006082904 | 0.007552219 | 0.003335104 |
| PC(41:7p)                  | 0.002238083 | 0.003645213 | 0.003107271 | 0.003353045 | 0.003981223 | 0.008785526 | 0.006626602 | 0.001988483 | 0.001465177 |
| TG(16:0/16:0/23:0)         | 0.004096296 | 0.001953503 | 0.004838549 | 0.005538434 | 0.006736328 | 0.002642357 | 0.006911677 | 0.00932886  | 0.010723839 |
| TG(55:1)                   | 0.011340816 | 0.004507884 | 0.018862998 | 0.005108963 | 0.002792662 | 0.003958143 | 0.010244279 | 0.005280031 | 0.034716228 |
| PC(38:8)                   | 0.01009117  | 0.006370104 | 0.013527426 | 0.011126381 | 0.009086926 | 0.006383653 | 0.009198608 | 0.006723655 | 0.007315185 |
| LPC(17:1)                  | 0.005716883 | 0.003783598 | 0.009217643 | 0.016528359 | 0.006939978 | 0.001533309 | 0.006165128 | 0.005323487 | 0.009752907 |
| LPC(17:1)(rep)             | 0.007894629 | 0.002795382 | 0.007399763 | 0.022002682 | 0.00804267  | 0.001651932 | 0.005104696 | 0.005985999 | 0.009470661 |
| LPC(20:5)(rep)             | 0.006813066 | 0.001745405 | 0.005144535 | 0.008493685 | 0.005768642 | 0.031912993 | 0.005572106 | 0.003929637 | 0.003740183 |
| PC(36:5)(rep)(rep)(rep)(re | 0.014500807 | 0.005518794 | 0.007421816 | 0.014712589 | 0.004647705 | 0.004488065 | 0.004752459 | 0.004631272 | 0.005081997 |
| PG(46:1)                   | 0.008250003 | 0.006464038 | 0.008018155 | 0.007392119 | 0.009828759 | 0.009312142 | 0.007411931 | 0.005532494 | 0.004445375 |
| TG(22:5/18:2/18:2)         | 0.005402698 | 0.002698706 | 0.005568843 | 0.012894151 | 0.007894591 | 0.006672601 | 0.007916426 | 0.010259985 | 0.003816428 |
| TG(56:9)                   | 0.007761939 | 0.004364775 | 0.00342566  | 0.011631648 | 0.013990558 | 0.009610599 | 0.010266213 | 0.013930906 | 0.007459716 |
| Cer(d18:1/18:0)            | 0.008053274 | 0.00693277  | 0.011027649 | 0.013176907 | 0.005899488 | 0.014332429 | 0.013842282 | 0.008436474 | 0.012276115 |
| LPE(18:0)                  | 0.00748134  | 0.004079928 | 0.008132255 | 0.004818616 | 0.003513107 | 0.002849771 | 0.008578919 | 0.003893503 | 0.004329934 |
| LPC(20:4)(rep)(rep)        | 0.006517135 | 0.006100789 | 0.005657472 | 0.004723957 | 0.019314387 | 0.002702319 | 0.005458289 | 0.006739358 | 0.005632614 |
| LdMePE(18:1)               | 0.005704586 | 0.003417132 | 0.010177792 | 0.005609406 | 0.021898537 | 0.001318371 | 0.005990189 | 0.006653058 | 0.008043341 |
| LPC(20:2)                  | 0.004660834 | 0.004827865 | 0.010426787 | 0.003459503 | 0.012842877 | 0.00339537  | 0.007675843 | 0.010413751 | 0.00728264  |
| LPA(20:4)                  | 0.005307031 | 0.004615881 | 0.004517581 | 0.008101048 | 0.009684724 | 0.009060179 | 0.006267982 | 0.006212249 | 0.005720387 |
| LPC(20:3)(rep)(rep)(rep)   | 0.005744177 | 0.010449459 | 0.02346287  | 0.005000564 | 0.00822264  | 0.006640882 | 0.009725905 | 0.003480093 | 0.005509215 |
| LPC(19:3)                  | 0.012747919 | 0.005122231 | 0.006594546 | 0.006939088 | 0.006677644 | 0.005088131 | 0.011819106 | 0.004422904 | 0.008037335 |
| LPC(20:3)(rep)(rep)        | 0.005547576 | 0.006079113 | 0.007534242 | 0.006182728 | 0.004952824 | 0.003307215 | 0.006422086 | 0.003748043 | 0.019088145 |
| MG(33:5)                   | 0.002563983 | 0.004862414 | 0.009595037 | 0.016674586 | 0.021794983 | 0.011525614 | 0.006202671 | 0.006887037 | 0.007313323 |
| SM(d38:4)(rep)             | 0.005051217 | 0.006148066 | 0.006552846 | 0.013648695 | 0.027939677 | 0.020267879 | 0.006299406 | 0.01825811  | 0.004009199 |
| SM(d38:5)                  | 0.005209833 | 0.009170563 | 0.010405251 | 0.015083289 | 0.03123636  | 0.012042648 | 0.003510477 | 0.018009341 | 0.006071487 |
| PI(36:2)(rep)              | 0.00662267  | 0.010772982 | 0.013693114 | 0.00451027  | 0.008323466 | 0.006306509 | 0.012229944 | 0.009611365 | 0.005636185 |
| PI(36:2)(rep)(rep)         | 0.005860097 | 0.011517998 | 0.014198442 | 0.004395456 | 0.007583625 | 0.008142385 | 0.015456508 | 0.006881371 | 0.005609    |
| SM(d38:4)                  | 0.003340816 | 0.013838018 | 0.00780243  | 0.010339461 | 0.013740084 | 0.021437099 | 0.006426581 | 0.018049036 | 0.004546543 |
| SM(d40:4)                  | 0.002908914 | 0.008032718 | 0.003138869 | 0.005271842 | 0.015848798 | 0.019109839 |             |             |             |

|                         |             |             |             |             |             |             |             |             |             |
|-------------------------|-------------|-------------|-------------|-------------|-------------|-------------|-------------|-------------|-------------|
| LPC(18:2)(rep)(rep)     | 0.003147756 | 0.004130625 | 0.002590909 | 0.003095433 | 0.004832565 | 0.002138213 | 0.004275301 | 0.00377593  | 0.00276553  |
| LPC(16:0)(rep)(rep)     | 0.002676548 | 0.002037787 | 0.003318873 | 0.004329944 | 0.004163943 | 0.002320516 | 0.004241372 | 0.002979136 | 0.003201696 |
| SM(d34:2)(rep)          | 0.003232742 | 0.003513996 | 0.003887845 | 0.002095868 | 0.002988696 | 0.004396306 | 0.001747959 | 0.003340785 | 0.001494655 |
| SM(d34:2)(rep)(rep)     | 0.002210471 | 0.002712881 | 0.002816742 | 0.002327421 | 0.002726447 | 0.004109459 | 0.002265851 | 0.003826223 | 0.001795245 |
| LPC(24:4)               | 0.009876286 | 0.002903884 | 0.003145994 | 0.006515692 | 0.007302765 | 0.000777026 | 0.006556016 | 0.002882552 | 0.004966063 |
| PC(44:7)                | 0.002924738 | 0.002261883 | 0.002796504 | 0.005667174 | 0.005257977 | 0.004807161 | 0.006987387 | 0.003901906 | 0.002433241 |
| LPC(22:1)               | 0.003509965 | 0.001979188 | 0.003571374 | 0.003803384 | 0.006296075 | 0.002474945 | 0.004564247 | 0.003657681 | 0.003205554 |
| LPC(22:1)(rep)          | 0.003798612 | 0.002058339 | 0.003240993 | 0.004941286 | 0.005032418 | 0.002761262 | 0.005258099 | 0.003457973 | 0.003769939 |
| CerG1(d18:1/22:0)       | 0.005225848 | 0.004104905 | 0.002201241 | 0.002248204 | 0.003785604 | 0.004202177 | 0.003334956 | 0.002857999 | 0.002165913 |
| PC(22:1/20:4)           | 0.006104533 | 0.00327153  | 0.004073591 | 0.004703881 | 0.005961315 | 0.003220646 | 0.002456292 | 0.005816107 | 0.003348518 |
| PC(42:5)                | 0.00442152  | 0.00277104  | 0.003109907 | 0.005538282 | 0.005914138 | 0.003814413 | 0.002172631 | 0.004670686 | 0.003025252 |
| PC(40:3)                | 0.003358058 | 0.002842466 | 0.003768619 | 0.002893267 | 0.006946238 | 0.040164376 | 0.005022675 | 0.002780595 | 0.002559007 |
| PC(20:2/20:4)           | 0.001469821 | 0.002663011 | 0.005127934 | 0.007267659 | 0.002728125 | 0.007413152 | 0.012584126 | 0.004119726 | 0.003312485 |
| SM(d34:1)               | 0.005235209 | 0.005094921 | 0.005554832 | 0.007044119 | 0.005711669 | 0.007867607 | 0.003059771 | 0.0053478   | 0.002912882 |
| SM(d36:3)(rep)          | 0.006062598 | 0.00912911  | 0.005449221 | 0.012966023 | 0.009600227 | 0.009884569 | 0.002858677 | 0.015437865 | 0.003175698 |
| PI(18:0/22:5)(rep)(rep) | 0.01567893  | 0.014532638 | 0.009026103 | 0.007649826 | 0.006135332 | 0.003814145 | 0.003626684 | 0.006036708 | 0.012575684 |
| PC(42:9)(rep)           | 0.016265094 | 0.006419542 | 0.012876713 | 0.014998832 | 0.016024802 | 0.003257554 | 0.0018325   | 0.005934613 | 0.008822915 |
| PC(18:0/22:5)           | 0.014979874 | 0.008862816 | 0.013413568 | 0.010891265 | 0.016366299 | 0.004657752 | 0.0018065   | 0.005741744 | 0.007442741 |
| PC(40:5)                | 0.013460957 | 0.008991115 | 0.010325423 | 0.009184963 | 0.019564674 | 0.005768968 | 0.002099297 | 0.006227347 | 0.006252025 |

| CP_10       | CP_11       | CP_12       | CP_13       | CP_14       | CP_15       | CP_16       | CP_17       | CP_18       | CP_19       | CP_20       |
|-------------|-------------|-------------|-------------|-------------|-------------|-------------|-------------|-------------|-------------|-------------|
| 0.006292346 | 0.004091282 | 0.002966728 | 0.006022549 | 0.00662587  | 0.003548398 | 0.006387295 | 0.005625577 | 0.007219007 | 0.001785574 | 0.004230262 |
| 0.003887072 | 0.003373137 | 0.003597142 | 0.00502125  | 0.0051093   | 0.002495374 | 0.004943081 | 0.003772762 | 0.00526562  | 0.001859366 | 0.002902458 |
| 0.003659662 | 0.003032939 | 0.00281623  | 0.004349161 | 0.004592404 | 0.003468477 | 0.004588447 | 0.003653188 | 0.007064142 | 0.002968804 | 0.003235232 |
| 0.003496287 | 0.003053219 | 0.002823114 | 0.003809777 | 0.004852567 | 0.0029583   | 0.004743738 | 0.00363881  | 0.005608946 | 0.002538169 | 0.002677036 |
| 0.003841002 | 0.002829025 | 0.003039656 | 0.003858208 | 0.005475032 | 0.00423572  | 0.003759468 | 0.003755824 | 0.005451763 | 0.002590746 | 0.003267788 |
| 0.003368609 | 0.002960717 | 0.002834142 | 0.004280717 | 0.00478168  | 0.003743519 | 0.003891024 | 0.003577804 | 0.007350194 | 0.003553404 | 0.0033388   |
| 0.004928525 | 0.003075301 | 0.003451053 | 0.004189668 | 0.00886922  | 0.005386901 | 0.003955634 | 0.005198329 | 0.005411169 | 0.002269048 | 0.003433445 |
| 0.004968496 | 0.002794187 | 0.003371555 | 0.004420801 | 0.008708168 | 0.004847426 | 0.004478599 | 0.005138556 | 0.006214803 | 0.00358793  | 0.003233483 |
| 0.007658444 | 0.002985561 | 0.005320411 | 0.008486157 | 0.006261977 | 0.00671931  | 0.006882335 | 0.010588499 | 0.006494347 | 0.001710201 | 0.008289927 |
| 0.004108817 | 0.002303152 | 0.003409835 | 0.005188198 | 0.008146938 | 0.004751869 | 0.004431466 | 0.004674519 | 0.004944392 | 0.002372115 | 0.004437836 |
| 0.005052684 | 0.00267856  | 0.004114836 | 0.007989181 | 0.006811674 | 0.005426487 | 0.006060264 | 0.004893532 | 0.004960801 | 0.001941591 | 0.008379676 |
| 0.003935625 | 0.002077591 | 0.00567091  | 0.004666523 | 0.004960488 | 0.00580735  | 0.004267932 | 0.005181012 | 0.020602    | 0.016780473 | 0.003568948 |
| 0.00392656  | 0.002168135 | 0.006047588 | 0.003338028 | 0.005326212 | 0.006037873 | 0.004507698 | 0.005503141 | 0.020730944 | 0.017481777 | 0.003523284 |
| 0.009585784 | 0.001194869 | 0.009208832 | 0.005149461 | 0.006610644 | 0.00291053  | 0.007827336 | 0.010336123 | 0.004448413 | 0.002404884 | 0.002819514 |
| 0.005734865 | 0.002134838 | 0.006374692 | 0.003546894 | 0.013302861 | 0.005135639 | 0.004363787 | 0.007678254 | 0.00534873  | 0.004313689 | 0.003378308 |
| 0.005351463 | 0.003538204 | 0.004286933 | 0.004045894 | 0.010447785 | 0.005870761 | 0.004233133 | 0.005403465 | 0.005380715 | 0.001871235 | 0.002853167 |
| 0.005842283 | 0.00311913  | 0.003789105 | 0.004162277 | 0.014010101 | 0.006221627 | 0.004338036 | 0.007228074 | 0.005249131 | 0.002324269 | 0.003178713 |
| 0.006324416 | 0.002519224 | 0.003593874 | 0.003806261 | 0.016910225 | 0.005768661 | 0.004150294 | 0.007193321 | 0.004178755 | 0.001527125 | 0.003167737 |
| 0.006085695 | 0.002180534 | 0.003489462 | 0.004152248 | 0.016423333 | 0.005831596 | 0.003954537 | 0.005978879 | 0.004635305 | 0.001905263 | 0.002422085 |
| 0.006449064 | 0.002406586 | 0.003636877 | 0.003867195 | 0.012234434 | 0.007149517 | 0.003905034 | 0.004649173 | 0.004850852 | 0.001729853 | 0.002250505 |
| 0.005582553 | 0.003044604 | 0.004157964 | 0.003822151 | 0.012273978 | 0.005911285 | 0.003850785 | 0.004794647 | 0.005471388 | 0.001741542 | 0.002324928 |
| 0.009330783 | 0.002408284 | 0.003070758 | 0.005207313 | 0.013101991 | 0.007721082 | 0.004805752 | 0.007973312 | 0.006115129 | 0.002306951 | 0.002414085 |
| 0.011537972 | 0.002780088 | 0.003681866 | 0.005141398 | 0.011855825 | 0.008294396 | 0.006450696 | 0.007640834 | 0.006695215 | 0.003099478 | 0.002920424 |
| 0.005525087 | 0.003839782 | 0.005718828 | 0.006020737 | 0.015220087 | 0.003086946 | 0.005618828 | 0.008993786 | 0.004349641 | 0.003176138 | 0.004732606 |
| 0.006085364 | 0.004053607 | 0.003568298 | 0.005565446 | 0.014129573 | 0.002601868 | 0.005348805 | 0.007404593 | 0.003471504 | 0.003332116 | 0.004178148 |
| 0.007296858 | 0.003254062 | 0.003838793 | 0.006016437 | 0.0133466   | 0.004252021 | 0.005002866 | 0.008767777 | 0.004241024 | 0.002210533 | 0.002481316 |
| 0.006319448 | 0.002179145 | 0.006179745 | 0.005971353 | 0.011834634 | 0.006196194 | 0.005998391 | 0.008050254 | 0.007785767 | 0.00256741  | 0.002896744 |
| 0.007213854 | 0.002638779 | 0.004002073 | 0.004115325 | 0.014000729 | 0.003985247 | 0.004834411 | 0.006532675 | 0.004152013 | 0.002889085 | 0.00309998  |
| 0.007454704 | 0.002266054 | 0.003174817 | 0.007144985 | 0.012085961 | 0.005578455 | 0.005492785 | 0.009989412 | 0.005789221 | 0.002941146 | 0.003455133 |
| 0.00859899  | 0.003448498 | 0.003812036 | 0.004338447 | 0.005686459 | 0.004119978 | 0.005476684 | 0.004275055 | 0.004066479 | 0.001112994 | 0.001422347 |
| 0.0027369   | 0.003335457 | 0.003220615 | 0.003860138 | 0.00843091  | 0.001948256 | 0.004465196 | 0.003253538 | 0.002242716 | 0.001144398 | 0.002176345 |
| 0.0025571   | 0.003225773 | 0.002879014 | 0.00383905  | 0.008504397 | 0.001987398 | 0.00458835  | 0.003209633 | 0.00210334  | 0.001226529 | 0.002076848 |
| 0.005088155 | 0.004144787 | 0.004264673 | 0.005138354 | 0.007734186 | 0.003903609 | 0.00448858  | 0.005174414 | 0.005415039 | 0.00244775  | 0.00180092  |
| 0.004945827 | 0.002423563 | 0.003745472 | 0.006124461 | 0.007030342 | 0.005688657 | 0.005345305 | 0.005337142 | 0.004507538 | 0.002034741 | 0.004033181 |
| 0.004704539 | 0.002611889 | 0.004067364 | 0.005569716 | 0.006849403 | 0.005573734 | 0.004868977 | 0.005197159 | 0.004143159 | 0.001764197 | 0.002854451 |
| 0.005345989 | 0.003086289 | 0.003424445 | 0.004538689 | 0.013542846 | 0.005663676 | 0.003357217 | 0.005470904 | 0.004303006 | 0.003010052 | 0.00488003  |
| 0.005098762 | 0.00262727  | 0.002879363 | 0.007513037 | 0.011594447 | 0.004735425 | 0.003142933 | 0.005384195 | 0.006642289 | 0.002232983 | 0.00486595  |
| 0.004751094 | 0.002678256 | 0.004111632 | 0.003914304 | 0.006359799 | 0.004390522 | 0.005525491 | 0.004918392 | 0.005234055 | 0.003180373 | 0.002626059 |
| 0.004206259 | 0.003069687 | 0.003531065 | 0.004385067 | 0.005383187 | 0.006700865 | 0.003855764 | 0.004080798 | 0.004520613 | 0.002913429 | 0.003254202 |
| 0.004359168 | 0.003122722 | 0.003814994 | 0.004127698 | 0.005557785 | 0.005846049 | 0.003695834 | 0.003935504 | 0.004374455 | 0.00277082  | 0.002997782 |
| 0.004393569 | 0.002825086 | 0.003643498 | 0.004407398 | 0.006730765 | 0.005718072 | 0.004077965 | 0.004341568 | 0.004500163 | 0.002566278 | 0.003310073 |
| 0.005160445 | 0.003169017 | 0.003770657 | 0.003950447 | 0.00715642  | 0.00597543  | 0.003513064 | 0.004568084 | 0.004958354 | 0.002530441 | 0.002934423 |
| 0.004873898 | 0.002496764 | 0.005261052 | 0.004528278 | 0.004251021 | 0.004468206 | 0.00263621  | 0.003705196 | 0.004219059 | 0.002190836 | 0.002516016 |
| 0.004827984 | 0.002983198 | 0.003933864 | 0.004017583 | 0.010282377 | 0.004832407 | 0.00331562  | 0.004127833 | 0.003250568 | 0.001609942 | 0.001723452 |
| 0.007010944 | 0.003061616 | 0.003987042 | 0.003566602 | 0.007661994 | 0.005073602 | 0.003470974 | 0.003870072 | 0.003213704 | 0.001935863 | 0.002300163 |
| 0.005509095 | 0.001291258 | 0.004076678 | 0.004502653 | 0.010309502 | 0.006709052 | 0.002179953 | 0.003887985 | 0.004609311 | 0.001376827 | 0.002382205 |
| 0.004801011 | 0.002884045 | 0.003539438 | 0.003468244 | 0.008825699 | 0.005483116 | 0.003340412 | 0.003908534 | 0.004136192 | 0.002293861 | 0.002257324 |
| 0.004921699 | 0.002788983 | 0.003508668 | 0.003459774 | 0.008786354 | 0.007538938 | 0.003243025 | 0.004031696 | 0.004289905 | 0.002078641 | 0.002044418 |
| 0.005481197 | 0.00323518  | 0.003903265 | 0.003485983 | 0.009051774 | 0.005939332 | 0.003614663 | 0.004238628 | 0.004486451 | 0.001969019 | 0.002194481 |
| 0.007700966 | 0.002103906 | 0.003063548 | 0.003513088 | 0.008445882 | 0.009102554 | 0.00363057  | 0.004055741 | 0.00414852  | 0.002549176 | 0.00244337  |
| 0.006405871 | 0.001873461 | 0.003447893 | 0.003911164 | 0.007153783 | 0.005930372 | 0.003369041 | 0.005408909 | 0.003735818 | 0.002459598 | 0.002832459 |
| 0.003693194 | 0.004016029 | 0.005825377 | 0.004597947 | 0.007922967 | 0.005609638 | 0.004473084 | 0.004390137 | 0.004334633 | 0.001983717 | 0.002046204 |
| 0.00525222  | 0.004345991 | 0.00446174  | 0.005413207 | 0.005174747 | 0.004324698 | 0.004105182 | 0.004218787 | 0.004112847 | 0.001488488 | 0.005059591 |
| 0.009873152 | 0.003324186 | 0.005495838 | 0.00355587  | 0.006597291 | 0.00570732  | 0.005921745 | 0.006454125 | 0.004171012 | 0.003126888 | 0.002739328 |
| 0.010453051 | 0.003590346 | 0.00495762  | 0.003628462 | 0.006656022 | 0.003741922 | 0.006140249 | 0.005097474 | 0.004312451 | 0.003569874 | 0.003011783 |
| 0.004965553 | 0.003156911 | 0.002825071 | 0.003317295 | 0.007832613 | 0.008308375 | 0.002780494 | 0.003567014 | 0.005042269 | 0.002771314 | 0.002654871 |
| 0.005189681 | 0.002996739 | 0.003275839 | 0.003781739 | 0.003824138 | 0.007344886 | 0.00419616  | 0.004250081 | 0.004034147 | 0.002318314 | 0.002410152 |
| 0.006272453 | 0.003102721 | 0.00465375  | 0.003631204 | 0.006379119 | 0.005716988 | 0.004799502 | 0.003680928 | 0.004204266 | 0.002493069 | 0.002917623 |
| 0.005808299 | 0.003516414 | 0.004604071 | 0.0035595   | 0.005183906 | 0.004939306 | 0.005091246 | 0.004014843 | 0.004381952 | 0.002762948 | 0.002877732 |
| 0.00870905  | 0.002349359 | 0.003351129 | 0.003574642 | 0.008042652 | 0.005234593 | 0.0043599   | 0.004470942 | 0.004079872 | 0.002566835 | 0.002746151 |
| 0.004557204 | 0.002591281 | 0.003384327 | 0.003403749 | 0.007345446 | 0.006752928 | 0.003110676 | 0.003508097 | 0.003606894 | 0.002490288 | 0.002394893 |
| 0.004531    | 0.002763986 | 0.003525707 | 0.004174595 | 0.007160468 | 0.005255719 | 0.003870992 | 0.00372338  | 0.003408742 | 0.00263046  | 0.002885543 |
| 0.00402832  | 0.003583634 | 0.004852278 | 0.004684031 | 0.008949255 | 0.004427008 | 0.004583058 | 0.004757026 | 0.004346283 | 0.002569854 | 0.002531792 |
| 0.004310088 | 0.004318191 | 0.005085202 | 0.002919538 | 0.005798155 | 0.005351464 | 0.004124662 | 0.003827377 | 0.003984172 | 0.000735065 | 0.002490616 |
| 0.006880468 | 0.001915413 | 0.003251957 | 0.00379489  | 0.007484075 | 0.009261143 | 0.003344467 | 0.004721682 | 0.004630342 | 0.001672808 | 0.002038641 |
| 0.009429314 | 0.002021473 | 0.002756971 | 0.003469182 | 0.011804135 | 0.007067214 | 0.004116089 | 0.005145314 | 0.003886296 | 0.001895938 | 0.002790251 |
| 0.008361269 | 0.002220231 | 0.00708268  | 0.004901338 | 0.004394284 | 0.00735863  | 0.007549835 | 0.007360713 | 0.005963449 | 0.000469351 | 0.001113706 |
| 0.015850208 | 0.003074399 | 0.003348168 | 0.010583597 | 0.006181936 | 0.007321526 | 0.008149666 | 0.003530078 | 0.001091715 | 0.002503726 | 0.003619762 |
| 0.0090      |             |             |             |             |             |             |             |             |             |             |

|             |              |             |             |             |             |             |             |             |             |             |
|-------------|--------------|-------------|-------------|-------------|-------------|-------------|-------------|-------------|-------------|-------------|
| 0.001973005 | 0.006053938  | 0.002365132 | 0.006829213 | 0.004799913 | 0.002660936 | 0.004407203 | 0.006623004 | 0.004140374 | 0.007832407 | 0.005310777 |
| 0.000963045 | 0.007252677  | 0.001565257 | 0.007239599 | 0.003368575 | 0.00353687  | 0.005686149 | 0.007526719 | 0.006234564 | 0.009131395 | 0.00680545  |
| 0.000874268 | 0.009312665  | 0.006570017 | 0.003041683 | 0.001836665 | 0.003377201 | 0.00523323  | 0.006358044 | 0.006172251 | 0.0137818   | 0.00498613  |
| 0.000598698 | 0.008335695  | 0.002883085 | 0.003504273 | 0.002178835 | 0.002407549 | 0.006627117 | 0.007972823 | 0.003828638 | 0.020657814 | 0.006931048 |
| 0.002339391 | 0.002657642  | 0.006183373 | 0.005216341 | 0.003170759 | 0.003972273 | 0.004938004 | 0.003012069 | 0.004387211 | 0.00304219  | 0.002489564 |
| 0.00221479  | 0.002739198  | 0.005766748 | 0.006100146 | 0.003480443 | 0.00411088  | 0.00468928  | 0.003063684 | 0.003756135 | 0.002672024 | 0.002136983 |
| 0.007689502 | 0.007027282  | 0.004346219 | 0.010464324 | 0.008039398 | 0.002924735 | 0.002146753 | 0.003420055 | 0.003220853 | 0.004607272 | 0.003858305 |
| 0.005625878 | 0.005723534  | 0.004282634 | 0.015619614 | 0.008779617 | 0.005205394 | 0.002985789 | 0.004166782 | 0.003784308 | 0.004487341 | 0.004773109 |
| 0.004360787 | 0.007525844  | 0.003965254 | 0.005515541 | 0.002822371 | 0.002563305 | 0.003444081 | 0.007369846 | 0.004667998 | 0.006819549 | 0.007034624 |
| 0.005421273 | 0.005461391  | 0.005324667 | 0.005539203 | 0.00293568  | 0.004237008 | 0.003974912 | 0.004137457 | 0.005284988 | 0.005950809 | 0.002530006 |
| 0.003344242 | 0.007661484  | 0.004221293 | 0.006407456 | 0.002946601 | 0.004106456 | 0.003763551 | 0.005590009 | 0.00536443  | 0.004455541 | 0.003786048 |
| 0.004027509 | 0.003857866  | 0.004621479 | 0.005343599 | 0.002716338 | 0.008129382 | 0.005032421 | 0.007209316 | 0.008682165 | 0.003269376 | 0.00410801  |
| 0.004150122 | 0.005511907  | 0.007112467 | 0.004602128 | 0.004029861 | 0.010441812 | 0.005852213 | 0.009254402 | 0.00379839  | 0.001161819 | 0.001308301 |
| 0.004371212 | 0.004488281  | 0.006374188 | 0.005354155 | 0.003250858 | 0.010609687 | 0.00523553  | 0.007513587 | 0.005627489 | 0.001433182 | 0.001867126 |
| 0.00354562  | 0.006232008  | 0.005919368 | 0.003751079 | 0.005315381 | 0.010872273 | 0.006580781 | 0.009246454 | 0.002874295 | 0.00105071  | 0.001009678 |
| 0.003005733 | 0.00424737   | 0.005685576 | 0.004287111 | 0.003912569 | 0.009594475 | 0.007456364 | 0.013041076 | 0.002949944 | 0.001377802 | 0.001995503 |
| 0.003297503 | 0.005559117  | 0.004500564 | 0.007057115 | 0.002437638 | 0.008007988 | 0.00736847  | 0.012783573 | 0.005816436 | 0.002893106 | 0.003344986 |
| 0.003971285 | 0.005369383  | 0.00447379  | 0.006317954 | 0.004249006 | 0.007622175 | 0.00717191  | 0.012325472 | 0.004711662 | 0.002078326 | 0.00406004  |
| 0.003320856 | 0.004733308  | 0.005554783 | 0.005683975 | 0.003272998 | 0.007039597 | 0.005845756 | 0.012706099 | 0.00306147  | 0.000875221 | 0.001228619 |
| 0.003804976 | 0.003862357  | 0.003814103 | 0.005632676 | 0.002886723 | 0.007320643 | 0.00626929  | 0.013275787 | 0.003357123 | 0.001136512 | 0.00186741  |
| 0.003777012 | 0.004138124  | 0.00568116  | 0.005186778 | 0.003124514 | 0.00867018  | 0.006313883 | 0.011401656 | 0.004368408 | 0.001515351 | 0.001805821 |
| 0.003462944 | 0.003811169  | 0.005097628 | 0.005256424 | 0.003519019 | 0.008637205 | 0.007239877 | 0.012812996 | 0.003148213 | 0.001234979 | 0.00146447  |
| 0.003962233 | 0.00332984   | 0.005175389 | 0.005867025 | 0.002694702 | 0.00815261  | 0.005994757 | 0.011307719 | 0.005843959 | 0.002128119 | 0.002708881 |
| 0.003773815 | 0.003228276  | 0.004655171 | 0.007105564 | 0.002577841 | 0.00621563  | 0.00724773  | 0.016858605 | 0.003626312 | 0.001842149 | 0.003693015 |
| 0.003285102 | 0.003160508  | 0.005714199 | 0.006093211 | 0.002920802 | 0.007580598 | 0.007725494 | 0.015806692 | 0.003154139 | 0.001620659 | 0.002161911 |
| 0.003831992 | 0.003101875  | 0.004960553 | 0.006146329 | 0.003019804 | 0.007163043 | 0.007666188 | 0.014715071 | 0.004260462 | 0.001580282 | 0.002545863 |
| 0.004158509 | 0.004019233  | 0.003810764 | 0.002769656 | 0.00330228  | 0.010517583 | 0.0037193   | 0.003078419 | 0.002556767 | 0.00213168  | 0.00216073  |
| 0.0036728   | 0.0089081    | 0.012539902 | 0.002550918 | 0.001255108 | 0.00786341  | 0.003942126 | 0.00437847  | 0.005926976 | 0.001904537 | 0.00218957  |
| 0.002063157 | 0.00680951   | 0.002341634 | 0.004929371 | 0.004122399 | 0.006132205 | 0.004586892 | 0.002814281 | 0.002616658 | 0.001225645 | 0.001384352 |
| 0.003682143 | 0.009889691  | 0.009211989 | 0.004458218 | 0.00211502  | 0.008123376 | 0.004551855 | 0.001352493 | 0.006265734 | 0.005804584 | 0.009033969 |
| 0.009097462 | 0.005715604  | 0.005371937 | 0.00909155  | 0.004144275 | 0.004449918 | 0.003642731 | 0.004129307 | 0.009547424 | 0.022148641 | 0.049906835 |
| 0.00512711  | 0.005694101  | 0.003108349 | 0.007339182 | 0.002065764 | 0.003458313 | 0.007080299 | 0.005300172 | 0.011861491 | 0.039115435 | 0.026413342 |
| 0.00839354  | 0.005328383  | 0.003990788 | 0.007398609 | 0.003469201 | 0.003541503 | 0.004418325 | 0.005300982 | 0.011587807 | 0.021723188 | 0.035151147 |
| 0.004955657 | 0.005326508  | 0.004695904 | 0.007941622 | 0.002366378 | 0.002384928 | 0.00485594  | 0.003888266 | 0.014341483 | 0.01062537  | 0.026847459 |
| 0.010122259 | 0.011133197  | 0.001842396 | 0.002591922 | 0.002099641 | 0.007408984 | 0.005613959 | 0.00347715  | 0.013071659 | 0.011462658 | 0.012182809 |
| 0.007454845 | 0.008964864  | 0.002554896 | 0.006311227 | 0.002102994 | 0.004648972 | 0.005015801 | 0.003701397 | 0.013543563 | 0.016484628 | 0.01902257  |
| 0.006985793 | 0.008225232  | 0.002457837 | 0.006468454 | 0.002286346 | 0.006004042 | 0.004483553 | 0.003450685 | 0.012582345 | 0.019591232 | 0.022412449 |
| 0.006433888 | 0.011619063  | 0.004217052 | 0.005305032 | 0.00234983  | 0.007074341 | 0.004018052 | 0.00283505  | 0.011512412 | 0.013186485 | 0.01750089  |
| 0.011181701 | 0.009503718  | 0.004846199 | 0.003255755 | 0.002341324 | 0.003184466 | 0.003906606 | 0.004203699 | 0.010722394 | 0.011309495 | 0.013425511 |
| 0.008600818 | 0.00584975   | 0.060851317 | 0.005512309 | 0.006098436 | 0.002123667 | 0.006663572 | 0.003716552 | 0.007180021 | 0.021569142 | 0.00764001  |
| 0.005377773 | 0.014667647  | 0.007547572 | 0.010330229 | 0.001620853 | 0.004516775 | 0.007249896 | 0.005353106 | 0.007860657 | 0.0114895   | 0.017345221 |
| 0.005223732 | 0.0083392113 | 0.007038528 | 0.010215382 | 0.002248384 | 0.004668476 | 0.00651257  | 0.004935246 | 0.006743459 | 0.011569946 | 0.019867306 |
| 0.004207317 | 0.009338613  | 0.003877352 | 0.006232957 | 0.002773516 | 0.003204527 | 0.004974067 | 0.00280422  | 0.00840775  | 0.014275063 | 0.020330044 |
| 0.004327092 | 0.009111268  | 0.006403458 | 0.009296024 | 0.001913875 | 0.005423632 | 0.009244919 | 0.004664985 | 0.006050578 | 0.007302313 | 0.013109046 |
| 0.004667105 | 0.009396083  | 0.006172859 | 0.007205229 | 0.002245639 | 0.005083739 | 0.008762768 | 0.004623559 | 0.006248418 | 0.00697528  | 0.013590194 |
| 0.004471097 | 0.01314647   | 0.003287762 | 0.005047579 | 0.002246377 | 0.004953799 | 0.004830789 | 0.006437208 | 0.003732986 | 0.004499761 | 0.008991363 |
| 0.006808631 | 0.008283733  | 0.002469328 | 0.004559313 | 0.005318096 | 0.004565307 | 0.002555353 | 0.004550971 | 0.004075415 | 0.001610698 | 0.007400754 |
| 0.006614663 | 0.010218044  | 0.00215232  | 0.011600005 | 0.007269924 | 0.001899683 | 0.009799293 | 0.007219602 | 0.003694509 | 0.007825439 | 0.005686921 |
| 0.003946005 | 0.004169886  | 0.005648504 | 0.007879749 | 0.002669692 | 0.001819041 | 0.010618895 | 0.005431733 | 0.00405857  | 0.004117223 | 0.011145993 |
| 0.002612873 | 0.003775856  | 0.004866892 | 0.006102783 | 0.002871482 | 0.002368751 | 0.006428314 | 0.004443669 | 0.003655674 | 0.014721504 | 0.014124993 |
| 0.014770433 | 0.008334895  | 0.002916115 | 0.00291349  | 0.004008183 | 0.005077021 | 0.004828388 | 0.008848947 | 0.012212803 | 0.011220453 | 0.018731451 |
| 0.019737255 | 0.002113082  | 0.004289798 | 0.007405757 | 0.002971201 | 0.01049323  | 0.003408212 | 0.0058133   | 0.010195289 | 0.010377438 | 0.006472923 |
| 0.002572107 | 0.012422785  | 0.010856663 | 0.005177056 | 0.005421079 | 0.010485183 | 0.00799579  | 0.00607797  | 0.005139743 | 0.003114337 | 0.002179542 |
| 0.003856615 | 0.020510593  | 0.010285734 | 0.01918096  | 0.003092899 | 0.007813201 | 0.009319038 | 0.005494514 | 0.003340212 | 0.004430955 | 0.001937737 |
| 0.004646858 | 0.015310727  | 0.009698469 | 0.020267393 | 0.003735962 | 0.007524083 | 0.006398737 | 0.005238063 | 0.003012747 | 0.00392575  | 0.001666023 |
| 0.00253268  | 0.005236636  | 0.007932857 | 0.003630175 | 0.002663369 | 0.00482969  | 0.005875057 | 0.004242093 | 0.003752351 | 0.007296674 | 0.003304687 |
| 0.004796033 | 0.008921251  | 0.015285268 | 0.006127605 | 0.00345715  | 0.010279779 | 0.010574841 | 0.006390844 | 0.00467843  | 0.010392786 | 0.003302955 |
| 0.005938727 | 0.010560876  | 0.007117121 | 0.002294665 | 0.009493236 | 0.004775009 | 0.011005821 | 0.014089333 | 0.021195444 | 0.011267908 | 0.00417001  |
| 0.032920134 | 0.008778103  | 0.026869032 | 0.014754703 | 0.004514751 | 0.004789189 | 0.00822716  | 0.003922121 | 0.01186139  | 0.021445797 | 0.002872893 |
| 0.005847814 | 0.014719918  | 0.01031007  | 0.003920598 | 0.009563906 | 0.006814161 | 0.009747233 | 0.004306935 | 0.005402383 | 0.016331763 | 0.002238567 |
| 0.02904434  | 0.006236519  | 0.00531712  | 0.012205146 | 0.009698224 | 0.008966694 | 0.012441353 | 0.017029943 | 0.009478726 | 0.009386741 | 0.016059939 |
| 0.004812495 | 0.006281071  | 0.006038411 | 0.005754827 | 0.004856712 | 0.004632616 | 0.00919093  | 0.004729429 | 0.003061286 | 0.026302782 | 0.002965113 |
| 0.005746544 | 0.011184846  | 0.008098183 | 0.01376448  | 0.003516636 | 0.004459834 | 0.004167413 | 0.004329338 | 0.00426414  | 0.00757913  | 0.015953299 |
| 0.01067241  | 0.011036406  | 0.018823874 | 0.014323868 | 0.004041774 | 0.00420516  | 0.009024973 | 0.006710299 | 0.002704944 | 0.005117254 | 0.008293502 |
| 0.005584776 | 0.024283559  | 0.01107376  | 0.010399152 | 0.004132668 | 0.004436514 | 0.010563617 | 0.004874639 | 0.002546949 | 0.001982682 | 0.003101431 |
| 0.005699436 | 0.005966806  | 0.01013294  | 0.004272962 | 0.003785585 | 0.006607915 | 0.007721905 | 0.005304301 | 0.004962924 | 0.007746282 | 0.003866831 |
| 0.00713952  | 0.007788282  | 0.0123916   | 0.004830219 | 0.009058143 | 0.012088474 | 0.005828234 | 0.013463319 | 0.004360031 | 0.004111475 | 0.010714196 |
| 0.00277225  | 0.01972307   | 0.008466991 | 0.022649912 | 0.003522187 | 0.006611238 | 0.010125922 | 0.005908927 | 0.004975447 | 0.00632178  | 0.002765668 |
| 0.015037737 | 0.022219646  | 0.023773618 | 0.005828694 | 0.004386496 |             |             |             |             |             |             |

|             |             |             |             |             |             |             |             |             |             |             |
|-------------|-------------|-------------|-------------|-------------|-------------|-------------|-------------|-------------|-------------|-------------|
| 0.00600159  | 0.003040956 | 0.003965093 | 0.010016204 | 0.00544111  | 0.001445611 | 0.00185176  | 0.002544777 | 0.00319614  | 0.00469892  | 0.005819955 |
| 0.003793966 | 0.002885575 | 0.004048949 | 0.001485344 | 0.003078257 | 0.002810597 | 0.004061914 | 0.00545736  | 0.004228141 | 0.003834879 | 0.003093969 |
| 0.002702351 | 0.003648932 | 0.005941314 | 0.003311827 | 0.001653616 | 0.004955769 | 0.005324393 | 0.001970486 | 0.003456943 | 0.004721587 | 0.002348806 |
| 0.002998374 | 0.003524524 | 0.004406813 | 0.002509311 | 0.001382243 | 0.003483484 | 0.003966618 | 0.001782897 | 0.003753534 | 0.004558691 | 0.003001386 |
| 0.003860743 | 0.006520543 | 0.008806418 | 0.009051157 | 0.004355482 | 0.00325763  | 0.00463455  | 0.00724167  | 0.001954503 | 0.007087551 | 0.006316011 |
| 0.001831026 | 0.005990991 | 0.00332272  | 0.007547988 | 0.002396398 | 0.007036367 | 0.00561918  | 0.005961858 | 0.004620994 | 0.012136987 | 0.013353938 |
| 0.003694861 | 0.005509078 | 0.005627907 | 0.005334893 | 0.002424727 | 0.009004607 | 0.003826835 | 0.004401041 | 0.002666249 | 0.006908689 | 0.009963463 |
| 0.003563014 | 0.005324132 | 0.004341218 | 0.006271438 | 0.002823756 | 0.009022265 | 0.004205434 | 0.005283893 | 0.002492306 | 0.007137247 | 0.00832864  |
| 0.003231867 | 0.00397573  | 0.010050373 | 0.005234263 | 0.000924005 | 0.003825138 | 0.002188613 | 0.008248251 | 0.004322627 | 0.00484295  | 0.003567511 |
| 0.003505013 | 0.005137399 | 0.003126785 | 0.001865388 | 0.002052596 | 0.01198326  | 0.003427474 | 0.002685737 | 0.007294311 | 0.009539492 | 0.007640087 |
| 0.002990827 | 0.004315366 | 0.00293907  | 0.003723683 | 0.001940108 | 0.008698359 | 0.002731774 | 0.00331374  | 0.010133407 | 0.011627973 | 0.011312425 |
| 0.004554319 | 0.004158145 | 0.003551993 | 0.002150455 | 0.002268787 | 0.010871776 | 0.00249754  | 0.003664722 | 0.014195302 | 0.003773512 | 0.005249465 |
| 0.009495338 | 0.003296774 | 0.002040975 | 0.007276883 | 0.007508175 | 0.001814441 | 0.004750492 | 0.002391556 | 0.009781468 | 0.008542035 | 0.007378483 |
| 0.004371038 | 0.005413257 | 0.005571542 | 0.005537427 | 0.003183663 | 0.005425387 | 0.004931916 | 0.003403499 | 0.005717482 | 0.006276116 | 0.006712852 |
| 0.003307545 | 0.017540991 | 0.008267652 | 0.013229246 | 0.003068195 | 0.008796939 | 0.009956488 | 0.00367319  | 0.010345392 | 0.005529569 | 0.006609497 |
| 0.00241355  | 0.005273924 | 0.015122487 | 0.013414848 | 0.002602782 | 0.008752506 | 0.012368848 | 0.002148489 | 0.002689024 | 0.005390861 | 0.009570969 |
| 0.003104295 | 0.010515307 | 0.014577855 | 0.007568259 | 0.00193279  | 0.016620264 | 0.008786059 | 0.002397951 | 0.004421735 | 0.002422439 | 0.007125301 |
| 0.002559289 | 0.00578574  | 0.007902247 | 0.006436616 | 0.001728722 | 0.016331883 | 0.006348929 | 0.003419164 | 0.009178091 | 0.007218591 | 0.009662052 |
| 0.002300177 | 0.005235253 | 0.007677205 | 0.006979461 | 0.001555876 | 0.015112097 | 0.00572458  | 0.003680703 | 0.00853842  | 0.006801978 | 0.012805536 |

| CP_21       | CP_22       | CP_23       | CP_24        | CP_25       | CP_26       | CP_27        | CP_28       | CP_29       | CP_30       | CP_31        |
|-------------|-------------|-------------|--------------|-------------|-------------|--------------|-------------|-------------|-------------|--------------|
| 0.006037466 | 0.00311504  | 0.003132296 | 0.00598295   | 0.007481459 | 0.006846763 | 0.003358718  | 0.005881568 | 0.004054696 | 0.007804302 | 0.008993885  |
| 0.006184384 | 0.002611892 | 0.002931567 | 0.006603371  | 0.009758883 | 0.005115323 | 0.001981658  | 0.00669408  | 0.005387315 | 0.010042903 | 0.007398913  |
| 0.006567925 | 0.003859555 | 0.002628367 | 0.007789917  | 0.009535415 | 0.006521944 | 0.002845886  | 0.008054774 | 0.005364321 | 0.010671137 | 0.010466483  |
| 0.007512266 | 0.003318651 | 0.00254033  | 0.007538788  | 0.008124437 | 0.006167156 | 0.002433001  | 0.00801727  | 0.00634438  | 0.009555805 | 0.009133103  |
| 0.005377379 | 0.003307489 | 0.002795542 | 0.005678273  | 0.008816447 | 0.005081102 | 0.002548533  | 0.006635263 | 0.005786688 | 0.011500137 | 0.009136412  |
| 0.005677697 | 0.004603636 | 0.002371912 | 0.0066633987 | 0.010374953 | 0.006074354 | 0.002873423  | 0.007523    | 0.005854584 | 0.015845178 | 0.012392997  |
| 0.006049507 | 0.004208637 | 0.003005544 | 0.00451036   | 0.00624124  | 0.003159064 | 0.00334421   | 0.004180797 | 0.003450178 | 0.00633369  | 0.004717543  |
| 0.005855161 | 0.002511948 | 0.002882325 | 0.005821479  | 0.01061462  | 0.00428992  | 0.002926387  | 0.005110009 | 0.005263074 | 0.009853279 | 0.0075052    |
| 0.007438879 | 0.003398164 | 0.001693953 | 0.004135186  | 0.005530504 | 0.003071049 | 0.006352289  | 0.004911656 | 0.005167686 | 0.005810948 | 0.004731318  |
| 0.005555316 | 0.004727098 | 0.002313223 | 0.004206409  | 0.005542477 | 0.002770728 | 0.003116004  | 0.00399224  | 0.003777438 | 0.007408637 | 0.005460489  |
| 0.005832035 | 0.004576389 | 0.001779608 | 0.003965179  | 0.00672726  | 0.003370978 | 0.005635143  | 0.003934514 | 0.015823334 | 0.006382286 | 0.00606937   |
| 0.005318152 | 0.00884618  | 0.01840917  | 0.003345704  | 0.003399422 | 0.005177247 | 0.003894937  | 0.004043053 | 0.005702691 | 0.003288009 | 0.005224     |
| 0.005506284 | 0.011470133 | 0.01807546  | 0.003682315  | 0.002656825 | 0.005128851 | 0.003855059  | 0.00402447  | 0.006003517 | 0.00332063  | 0.004839964  |
| 0.006554387 | 0.004337305 | 0.004088266 | 0.004441996  | 0.011054233 | 0.001199035 | 0.001215889  | 0.001073097 | 0.005973005 | 0.00899357  | 0.003333982  |
| 0.005041095 | 0.001443104 | 0.002366875 | 0.00616115   | 0.006041734 | 0.003996732 | 0.002764134  | 0.006823453 | 0.003810242 | 0.00596592  | 0.003268678  |
| 0.00745843  | 0.003195166 | 0.002752922 | 0.005179262  | 0.007331583 | 0.003946715 | 0.003778533  | 0.00460429  | 0.004035151 | 0.005996797 | 0.00450634   |
| 0.00912968  | 0.002067315 | 0.003159171 | 0.006022079  | 0.00981269  | 0.003872554 | 0.003777469  | 0.00490687  | 0.005023296 | 0.00679992  | 0.004412504  |
| 0.008726413 | 0.005177305 | 0.002420911 | 0.005826606  | 0.008760357 | 0.003874498 | 0.003677163  | 0.004103654 | 0.005351135 | 0.00559671  | 0.003968451  |
| 0.007025903 | 0.002448666 | 0.002737422 | 0.005193071  | 0.010437713 | 0.003588311 | 0.003588311  | 0.004090354 | 0.004426352 | 0.005003057 | 0.003312704  |
| 0.007850364 | 0.00271578  | 0.003023857 | 0.004254929  | 0.005998829 | 0.003652859 | 0.00375885   | 0.003770293 | 0.004709318 | 0.005028255 | 0.003767693  |
| 0.007766702 | 0.003012078 | 0.00300186  | 0.005036368  | 0.007300786 | 0.003801711 | 0.003657673  | 0.004136042 | 0.004285189 | 0.005859786 | 0.003892656  |
| 0.006723791 | 0.001626478 | 0.002213639 | 0.005515201  | 0.007889843 | 0.005462115 | 0.005498126  | 0.004759503 | 0.006881888 | 0.008585333 | 0.00216817   |
| 0.006962566 | 0.000863441 | 0.003477814 | 0.008323556  | 0.005119013 | 0.005479033 | 0.004712589  | 0.003353128 | 0.005031357 | 0.005450853 | 0.003927162  |
| 0.00817062  | 0.001347571 | 0.007073609 | 0.00605715   | 0.002431096 | 0.002766671 | 0.001906163  | 0.004907251 | 0.002348078 | 0.002832193 | 0.002166197  |
| 0.005178741 | 0.001525411 | 0.005391978 | 0.003781683  | 0.003760972 | 0.003000967 | 0.002200317  | 0.003141876 | 0.002941334 | 0.002034898 | 0.002364739  |
| 0.008094752 | 0.001507498 | 0.0046574   | 0.00645734   | 0.006220616 | 0.001470682 | 0.002412458  | 0.004988078 | 0.00396786  | 0.00447959  | 0.002996551  |
| 0.005617579 | 0.001265901 | 0.002481929 | 0.005530907  | 0.005459145 | 0.003653085 | 0.004916832  | 0.003138761 | 0.002558375 | 0.003496114 | 0.002752022  |
| 0.005708088 | 0.001329005 | 0.005179004 | 0.005043763  | 0.004371149 | 0.003076453 | 0.003182488  | 0.003834534 | 0.002456211 | 0.003087125 | 0.002408946  |
| 0.005623316 | 0.002251578 | 0.00174892  | 0.006144228  | 0.007257897 | 0.003628869 | 0.002000878  | 0.005069926 | 0.003993591 | 0.004500287 | 0.00254544   |
| 0.005559384 | 0.00189975  | 0.002122866 | 0.007612966  | 0.005825854 | 0.003843933 | 0.003951424  | 0.002724176 | 0.004502332 | 0.001853148 | 0.004835345  |
| 0.009109559 | 0.001661397 | 0.006771129 | 0.004371757  | 0.004208525 | 0.002624299 | 0.00240283   | 0.002912926 | 0.005452875 | 0.002923079 | 0.005259973  |
| 0.009259189 | 0.001636132 | 0.007350975 | 0.003334396  | 0.004270637 | 0.002977712 | 0.002240522  | 0.00295658  | 0.005661318 | 0.003061667 | 0.005177063  |
| 0.004988433 | 0.000999144 | 0.004675927 | 0.004850433  | 0.009691894 | 0.00505874  | 0.001963865  | 0.002548416 | 0.003394498 | 0.004947121 | 0.00505925   |
| 0.005499742 | 0.002915921 | 0.002008068 | 0.004146388  | 0.005071747 | 0.003142549 | 0.003332414  | 0.003732319 | 0.003835539 | 0.005497521 | 0.004831654  |
| 0.005151184 | 0.001959139 | 0.002384638 | 0.004757745  | 0.005683812 | 0.003096518 | 0.002419978  | 0.004486446 | 0.003114937 | 0.005134731 | 0.004733463  |
| 0.006813788 | 0.002656031 | 0.002657342 | 0.0061014    | 0.00712111  | 0.003288949 | 0.002801947  | 0.003716524 | 0.003558697 | 0.004641998 | 0.003258277  |
| 0.005632319 | 0.003131696 | 0.005147672 | 0.00522918   | 0.007676995 | 0.003134741 | 0.002596676  | 0.003379784 | 0.003430357 | 0.005146441 | 0.003736865  |
| 0.004493126 | 0.00296884  | 0.003804884 | 0.004634265  | 0.006404497 | 0.003366936 | 0.0029437    | 0.004968804 | 0.003604837 | 0.00711471  | 0.005587447  |
| 0.004550031 | 0.002726999 | 0.004204249 | 0.004298514  | 0.004855447 | 0.003207682 | 0.002923742  | 0.00402515  | 0.003228258 | 0.004466487 | 0.004188558  |
| 0.004615963 | 0.002783915 | 0.004779891 | 0.004068847  | 0.004864018 | 0.003590351 | 0.003001709  | 0.003765698 | 0.003121478 | 0.003714339 | 0.003495043  |
| 0.004869308 | 0.003527637 | 0.003232713 | 0.004547201  | 0.005102619 | 0.003204111 | 0.002948101  | 0.004056084 | 0.00377596  | 0.005451231 | 0.004547844  |
| 0.005160482 | 0.003019863 | 0.003023858 | 0.004343531  | 0.005300672 | 0.003498817 | 0.003188399  | 0.00376161  | 0.003307066 | 0.004561436 | 0.003892511  |
| 0.006802265 | 0.003042965 | 0.005246258 | 0.004673512  | 0.002317466 | 0.002975834 | 0.002975834  | 0.003562672 | 0.003889464 | 0.00472705  | 0.003855286  |
| 0.0063201   | 0.002430472 | 0.003147574 | 0.005496178  | 0.005121016 | 0.003404448 | 0.003271458  | 0.00284808  | 0.003800016 | 0.003391111 | 0.003426084  |
| 0.005869466 | 0.002711329 | 0.004390975 | 0.005157415  | 0.004528917 | 0.003240211 | 0.002499992  | 0.002793048 | 0.003058739 | 0.003515697 | 0.003058363  |
| 0.006724547 | 0.003889271 | 0.004398417 | 0.004208323  | 0.005168989 | 0.00306118  | 0.002371507  | 0.003009353 | 0.003938483 | 0.00460664  | 0.003496119  |
| 0.006016177 | 0.002573866 | 0.002873257 | 0.004851605  | 0.003698831 | 0.003129182 | 0.0030382655 | 0.003176553 | 0.003923441 | 0.003323215 | 0.003332315  |
| 0.006318265 | 0.002813912 | 0.002849791 | 0.004475472  | 0.005224965 | 0.003681882 | 0.003197722  | 0.003343046 | 0.003678454 | 0.004383647 | 0.003548128  |
| 0.006264997 | 0.002857094 | 0.002755    | 0.004917193  | 0.005893824 | 0.004079196 | 0.003443435  | 0.003448397 | 0.003645728 | 0.004614923 | 0.003457796  |
| 0.005495423 | 0.002385008 | 0.002760059 | 0.004427606  | 0.003872184 | 0.003798861 | 0.00299962   | 0.003232809 | 0.00337368  | 0.00377368  | 0.00379855   |
| 0.005384783 | 0.002027883 | 0.003411666 | 0.003914409  | 0.007004102 | 0.003288555 | 0.003204099  | 0.003429978 | 0.003857299 | 0.003737016 | 0.003154684  |
| 0.011627649 | 0.002166907 | 0.00273415  | 0.004745554  | 0.009967089 | 0.004357543 | 0.005782794  | 0.003840269 | 0.003480063 | 0.004419602 | 0.003838047  |
| 0.005462752 | 0.002866827 | 0.003633804 | 0.004019635  | 0.007751029 | 0.002614656 | 0.004392163  | 0.002674596 | 0.003331536 | 0.004411765 | 0.004169145  |
| 0.007607678 | 0.002519352 | 0.003544822 | 0.008373659  | 0.004393041 | 0.006235148 | 0.007197221  | 0.004719651 | 0.005159648 | 0.002458029 | 0.00552732   |
| 0.009071208 | 0.003286257 | 0.003424998 | 0.005532619  | 0.004352607 | 0.119191915 | 0.010318301  | 0.003836775 | 0.00445724  | 0.001890378 | 0.007040781  |
| 0.003404093 | 0.002556122 | 0.00421599  | 0.003886121  | 0.003335897 | 0.003330858 | 0.003626499  | 0.003617297 | 0.003215579 | 0.002942612 | 0.004878078  |
| 0.004413164 | 0.001303438 | 0.002275758 | 0.00548213   | 0.003749071 | 0.00411721  | 0.003298775  | 0.003156474 | 0.003507992 | 0.003386012 | 0.004848046  |
| 0.009265257 | 0.002719212 | 0.003576353 | 0.003699444  | 0.004251029 | 0.004787804 | 0.008711972  | 0.002784871 | 0.003478479 | 0.002629755 | 0.00501201   |
| 0.005940966 | 0.002471787 | 0.00286991  | 0.005503755  | 0.004368144 | 0.005062818 | 0.005092654  | 0.003564526 | 0.00340717  | 0.003237492 | 0.003890371  |
| 0.004837543 | 0.002113947 | 0.003183747 | 0.004569867  | 0.002918375 | 0.004592029 | 0.00466159   | 0.003089295 | 0.003103926 | 0.002534302 | 0.003402409  |
| 0.005348109 | 0.002901825 | 0.003192636 | 0.004070516  | 0.003731578 | 0.003327789 | 0.003574742  | 0.003004374 | 0.003041859 | 0.003250637 | 0.003560612  |
| 0.004713088 | 0.002776727 | 0.003451914 | 0.004017237  | 0.003094576 | 0.004124551 | 0.003738105  | 0.00317883  | 0.00276894  | 0.002922077 | 0.003831288  |
| 0.005718225 | 0.002708127 | 0.003385963 | 0.004278691  | 0.005246361 | 0.004052264 | 0.001737827  | 0.003870737 | 0.00319828  | 0.00326887  | 0.003511676  |
| 0.008243884 | 0.002072605 | 0.003104105 | 0.005266507  | 0.004809431 | 0.006965177 | 0.004087492  | 0.003169632 | 0.003300355 | 0.003559096 | 0.004080742  |
| 0.004609511 | 0.002472622 | 0.002572525 | 0.004985094  | 0.004106438 | 0.003441316 | 0.003426033  | 0.002832995 | 0.004492239 | 0.00454227  | 0.00442389   |
| 0.003943805 | 0.001708796 | 0.002933934 | 0.006605268  | 0.003573845 | 0.00508864  | 0.00426035   | 0.002637632 | 0.003862648 | 0.004626613 | 0.00374196   |
| 0.005780806 | 0.001648276 | 0.002289047 | 0.009511022  | 0.004261645 | 0.005753959 | 0.004855912  | 0.00227238  | 0.005121613 | 0.00328293  | 0.006068784  |
| 0.004255268 | 0.001729359 | 0.002286437 | 0.01171361   | 0.004204326 | 0.005540525 | 0.005334986  | 0.001985047 | 0.005296643 | 0.002843388 | 0.0049999257 |
| 0.005657261 | 0.002395322 |             |              |             |             |              |             |             |             |              |

|             |             |             |             |             |             |             |             |             |             |              |
|-------------|-------------|-------------|-------------|-------------|-------------|-------------|-------------|-------------|-------------|--------------|
| 0.005113417 | 0.005672604 | 0.004467181 | 0.001662872 | 0.004201038 | 0.002510832 | 0.00236946  | 0.00926135  | 0.002761952 | 0.002351231 | 0.009424767  |
| 0.006040945 | 0.001231639 | 0.004081581 | 0.004237191 | 0.005241783 | 0.002419266 | 0.002320679 | 0.007668165 | 0.003657469 | 0.002287283 | 0.004698236  |
| 0.00627367  | 0.004938522 | 0.004674844 | 0.00393182  | 0.007155436 | 0.005120283 | 0.00206671  | 0.00528333  | 0.005157809 | 0.003302309 | 0.004258206  |
| 0.009318173 | 0.003329226 | 0.006304099 | 0.003955036 | 0.004834555 | 0.004773895 | 0.002221361 | 0.010826927 | 0.003906539 | 0.003499859 | 0.002331963  |
| 0.006586552 | 0.007388882 | 0.001683042 | 0.005383587 | 0.005431623 | 0.002938405 | 0.001964377 | 0.005075873 | 0.004698687 | 0.003126975 | 0.010001551  |
| 0.006494952 | 0.007004479 | 0.001606196 | 0.002918903 | 0.006221416 | 0.002965492 | 0.001918575 | 0.005211068 | 0.003738048 | 0.003491149 | 0.008521887  |
| 0.003243838 | 0.006661935 | 0.004092211 | 0.002974751 | 0.002741011 | 0.002649843 | 0.002339886 | 0.001581874 | 0.002212906 | 0.002998057 | 0.00551539   |
| 0.003935867 | 0.010503206 | 0.006309944 | 0.002593111 | 0.00334519  | 0.001804363 | 0.002221995 | 0.004434138 | 0.003011039 | 0.002972326 | 0.005632066  |
| 0.005258251 | 0.009518082 | 0.00504011  | 0.001956641 | 0.003569113 | 0.003751273 | 0.003155958 | 0.006190702 | 0.003913843 | 0.003602193 | 0.003221949  |
| 0.00444763  | 0.006828029 | 0.0045824   | 0.003499062 | 0.003842208 | 0.00437138  | 0.003433891 | 0.004066683 | 0.003837043 | 0.002554942 | 0.003969562  |
| 0.005183868 | 0.005542417 | 0.004522326 | 0.002320722 | 0.004091061 | 0.004198012 | 0.002918186 | 0.002105432 | 0.003993019 | 0.003208569 | 0.00425955   |
| 0.002123674 | 0.007838187 | 0.004424443 | 0.004946289 | 0.011527125 | 0.004511702 | 0.003838042 | 0.004599588 | 0.011351306 | 0.018229341 | 0.007843285  |
| 0.00258696  | 0.001655099 | 0.003757875 | 0.009600362 | 0.007779264 | 0.005081114 | 0.004367803 | 0.002786571 | 0.013725753 | 0.009008275 | 0.005637457  |
| 0.001954307 | 0.003065435 | 0.003709129 | 0.008016314 | 0.009228391 | 0.005478758 | 0.005194083 | 0.003349913 | 0.011701613 | 0.011246052 | 0.006694257  |
| 0.003987236 | 0.0012074   | 0.002902214 | 0.008884567 | 0.008985147 | 0.004387758 | 0.003171473 | 0.002556044 | 0.016761792 | 0.007800687 | 0.004659229  |
| 0.003309744 | 0.002583221 | 0.00266697  | 0.00701553  | 0.008540011 | 0.00367981  | 0.002985548 | 0.002758503 | 0.020049329 | 0.008846161 | 0.003899539  |
| 0.001724195 | 0.004205469 | 0.003484703 | 0.006447887 | 0.009307087 | 0.005441045 | 0.003760548 | 0.003375328 | 0.016453395 | 0.00386659  | 0.005967897  |
| 0.002511725 | 0.003197082 | 0.003501358 | 0.004424785 | 0.009062791 | 0.00449819  | 0.003583937 | 0.003848031 | 0.016680878 | 0.010778186 | 0.005466325  |
| 0.003324705 | 0.001661786 | 0.003267887 | 0.00710649  | 0.007044999 | 0.004388886 | 0.003750612 | 0.003068758 | 0.016667368 | 0.008500054 | 0.004193477  |
| 0.003660809 | 0.002343101 | 0.004352359 | 0.006456472 | 0.009163003 | 0.004149526 | 0.004518057 | 0.002973913 | 0.016444229 | 0.009326704 | 0.004322316  |
| 0.002852613 | 0.002173043 | 0.003254542 | 0.006005011 | 0.008109331 | 0.004629905 | 0.00415241  | 0.003206062 | 0.015790199 | 0.00928166  | 0.005393463  |
| 0.003810615 | 0.001819575 | 0.003119062 | 0.005646116 | 0.008495337 | 0.004241857 | 0.003978016 | 0.003191407 | 0.017971969 | 0.008607657 | 0.004537924  |
| 0.00198916  | 0.004118496 | 0.004023323 | 0.005014348 | 0.00894167  | 0.004276198 | 0.005517316 | 0.003858981 | 0.014529264 | 0.011312527 | 0.006450242  |
| 0.002860824 | 0.005393053 | 0.005021427 | 0.005308329 | 0.008771354 | 0.003808856 | 0.005502143 | 0.003558461 | 0.017722272 | 0.008961514 | 0.00220741   |
| 0.002938288 | 0.002489149 | 0.004098745 | 0.004776789 | 0.009110259 | 0.003587914 | 0.004704902 | 0.003213376 | 0.019573712 | 0.009006893 | 0.00417074   |
| 0.00257883  | 0.002906895 | 0.003675017 | 0.00468023  | 0.008231198 | 0.003862386 | 0.004492859 | 0.00371053  | 0.018010634 | 0.008862883 | 0.004911189  |
| 0.004372078 | 0.001570822 | 0.003514747 | 0.005745398 | 0.002921635 | 0.003299463 | 0.021339842 | 0.022826827 | 0.005567373 | 0.00364867  | 0.00226605   |
| 0.00731894  | 0.001804283 | 0.003843485 | 0.003843471 | 0.016087116 | 0.007428397 | 0.004333918 | 0.007954188 | 0.024621661 | 0.004570566 | 0.005961148  |
| 0.003326879 | 0.000964427 | 0.002547573 | 0.008098814 | 0.00427484  | 0.006167164 | 0.000971824 | 0.002196755 | 0.008226105 | 0.005194639 | 0.007340583  |
| 0.002166978 | 0.034350765 | 0.006618854 | 0.010206958 | 0.009806166 | 0.010275991 | 0.006575103 | 0.006580937 | 0.003376746 | 0.011067841 | 0.015286668  |
| 0.005461586 | 0.004374101 | 0.014597598 | 0.002975298 | 0.004256504 | 0.010304024 | 0.013504576 | 0.013535426 | 0.002078841 | 0.013986229 | 0.00445778   |
| 0.011625811 | 0.024466666 | 0.020720652 | 0.002443875 | 0.00462724  | 0.008339634 | 0.012312791 | 0.017591871 | 0.004408328 | 0.010086982 | 0.007020012  |
| 0.011199696 | 0.016359894 | 0.013854809 | 0.003308789 | 0.002554231 | 0.007004396 | 0.011694835 | 0.014825042 | 0.001881532 | 0.004652612 | 0.004632417  |
| 0.00425937  | 0.016956856 | 0.014565863 | 0.003046391 | 0.003562727 | 0.009193496 | 0.010629668 | 0.011881441 | 0.002322828 | 0.009492667 | 0.004278687  |
| 0.010096228 | 0.019763368 | 0.008164223 | 0.007562697 | 0.004446951 | 0.003912379 | 0.009510934 | 0.004490028 | 0.001287349 | 0.010280863 | 0.008067436  |
| 0.008923602 | 0.020566488 | 0.009032424 | 0.005176873 | 0.00283515  | 0.004279337 | 0.009583056 | 0.007125097 | 0.000837931 | 0.006216146 | 0.007427226  |
| 0.008498776 | 0.024877677 | 0.008907747 | 0.007277132 | 0.005385286 | 0.004889937 | 0.012639612 | 0.006629935 | 0.001463496 | 0.008708284 | 0.009966393  |
| 0.007759223 | 0.018089783 | 0.014733782 | 0.00722327  | 0.005315099 | 0.006167897 | 0.007039627 | 0.006365735 | 0.006605284 | 0.008082867 | 0.009082867  |
| 0.007262727 | 0.016039254 | 0.010500098 | 0.006768907 | 0.002147101 | 0.003249792 | 0.005383579 | 0.004410962 | 0.002569142 | 0.008442928 | 0.007487026  |
| 0.013054024 | 0.008372373 | 0.008249828 | 0.007042123 | 0.003822391 | 0.007340681 | 0.008609926 | 0.009182245 | 0.001475239 | 0.00498051  | 0.006191668  |
| 0.00726203  | 0.021790446 | 0.00847932  | 0.009303382 | 0.006372933 | 0.009442932 | 0.010141558 | 0.010131547 | 0.003655319 | 0.00806309  | 0.00987536   |
| 0.009130222 | 0.018327011 | 0.010944029 | 0.008873391 | 0.006082991 | 0.006369157 | 0.009565127 | 0.009922879 | 0.003226345 | 0.007942731 | 0.010478424  |
| 0.006261837 | 0.026119705 | 0.012545302 | 0.003415114 | 0.003438675 | 0.004823553 | 0.011756409 | 0.008572633 | 0.00202943  | 0.006322233 | 0.009448649  |
| 0.004121192 | 0.016075087 | 0.009958036 | 0.004886705 | 0.00627483  | 0.006240692 | 0.01318731  | 0.00604364  | 0.00360922  | 0.007648346 | 0.011305102  |
| 0.004097627 | 0.017594037 | 0.010534318 | 0.004520705 | 0.005047532 | 0.006872885 | 0.013532407 | 0.006046295 | 0.003057635 | 0.007840145 | 0.01079343   |
| 0.008173064 | 0.002601632 | 0.011193864 | 0.011037601 | 0.005483091 | 0.009634432 | 0.01185165  | 0.013003849 | 0.004638349 | 0.006275497 | 0.001984311  |
| 0.006035704 | 0.002473091 | 0.006342045 | 0.006544215 | 0.004030906 | 0.011224127 | 0.026175801 | 0.010641481 | 0.002073115 | 0.005499244 | 0.002055576  |
| 0.008166783 | 0.00204294  | 0.004223251 | 0.006255511 | 0.006164692 | 0.0140331   | 0.007176445 | 0.009230382 | 0.003364832 | 0.00355704  | 0.005554173  |
| 0.003651843 | 0.005028033 | 0.006995471 | 0.001994087 | 0.002605255 | 0.004686176 | 0.008783456 | 0.010314097 | 0.003719704 | 0.002447941 | 0.005346725  |
| 0.006729058 | 0.013037695 | 0.00891912  | 0.002863281 | 0.003032404 | 0.006367158 | 0.008132012 | 0.010931272 | 0.004554965 | 0.003740177 | 0.005599415  |
| 0.005805181 | 0.007238756 | 0.005014477 | 0.00264064  | 0.004825653 | 0.001972818 | 0.003610519 | 0.004555891 | 0.002723212 | 0.013573087 | 0.008465684  |
| 0.007207389 | 0.00193711  | 0.004702413 | 0.007763697 | 0.007724611 | 0.005692856 | 0.004109818 | 0.002085462 | 0.003610461 | 0.025359079 | 0.008144817  |
| 0.001820463 | 0.003991722 | 0.005064342 | 0.010103837 | 0.009954539 | 0.007889775 | 0.003880539 | 0.007304929 | 0.01228208  | 0.007214753 | 0.006381049  |
| 0.003495759 | 0.00187877  | 0.004197543 | 0.037527156 | 0.007793192 | 0.010332535 | 0.005312028 | 0.004190837 | 0.006250484 | 0.007010253 | 0.012148465  |
| 0.003281964 | 0.001951631 | 0.005834318 | 0.017768978 | 0.010810463 | 0.016669475 | 0.006143637 | 0.006800353 | 0.005632213 | 0.007019784 | 0.009643137  |
| 0.004578708 | 0.003663524 | 0.002792221 | 0.007411798 | 0.00633301  | 0.005245986 | 0.002993638 | 0.004198801 | 0.005112848 | 0.004814916 | 0.005922428  |
| 0.008701263 | 0.006975957 | 0.002454929 | 0.009837523 | 0.014619809 | 0.007536008 | 0.005025342 | 0.00458378  | 0.013017846 | 0.004614811 | 0.006935519  |
| 0.009727592 | 0.012227703 | 0.006762318 | 0.012304832 | 0.014295657 | 0.003801793 | 0.00297921  | 0.017545189 | 0.021746561 | 0.001196201 | 0.015518549  |
| 0.008377646 | 0.004587171 | 0.003138714 | 0.008903997 | 0.017755507 | 0.008000154 | 0.017875047 | 0.019854256 | 0.003702162 | 0.006818106 | 0.008316917  |
| 0.009787855 | 0.004968087 | 0.004933618 | 0.010071231 | 0.006699585 | 0.007740081 | 0.007253873 | 0.010864045 | 0.004309125 | 0.00438801  | 0.0080626051 |
| 0.006688467 | 0.002210302 | 0.014274102 | 0.006579896 | 0.004298673 | 0.011271567 | 0.003507587 | 0.007406826 | 0.00671123  | 0.002951382 | 0.002935292  |
| 0.035790312 | 0.002346253 | 0.026623253 | 0.004954273 | 0.005083359 | 0.004805705 | 0.003808508 | 0.002724083 | 0.004854895 | 0.005038049 | 0.007288488  |
| 0.003563102 | 0.00579243  | 0.006179685 | 0.003724065 | 0.004825127 | 0.004706169 | 0.007944841 | 0.00564712  | 0.003137881 | 0.004555427 | 0.004052843  |
| 0.003433512 | 0.003062809 | 0.003012407 | 0.023586827 | 0.003955138 | 0.007562519 | 0.009833468 | 0.003227428 | 0.003192497 | 0.00668942  | 0.01049744   |
| 0.003150244 | 0.003277639 | 0.004849797 | 0.014783977 | 0.003068519 | 0.006804728 | 0.010304314 | 0.002347052 | 0.004762696 | 0.006183648 | 0.011544409  |
| 0.005789447 | 0.007993538 | 0.005037869 | 0.007972083 | 0.004644176 | 0.004306158 | 0.006483863 | 0.005055007 | 0.006345342 | 0.007106384 | 0.0053818    |
| 0.00400759  | 0.006596859 | 0.002612366 | 0.008074738 | 0.00551657  | 0.001772025 | 0.012843641 | 0.006867487 | 0.002660884 | 0.006869649 | 0.008806865  |
| 0.004134413 | 0.002558851 | 0.004178184 | 0.007652747 | 0.011412127 | 0.007453404 | 0.004154    | 0.004045797 | 0.004403756 | 0.005460141 | 0.011212627  |
| 0.003314579 | 0.003636219 | 0.003170374 | 0.004116625 | 0.015773832 | 0.005331847 | 0.004168099 |             |             |             |              |

|             |             |             |             |             |             |             |             |             |             |             |
|-------------|-------------|-------------|-------------|-------------|-------------|-------------|-------------|-------------|-------------|-------------|
| 0.005245413 | 0.003492788 | 0.005000438 | 0.002792605 | 0.002237216 | 0.003561753 | 0.004812309 | 0.002679764 | 0.001903108 | 0.006792844 | 0.004418547 |
| 0.00344814  | 0.002560765 | 0.00274388  | 0.003295492 | 0.003704702 | 0.005758683 | 0.006520867 | 0.004143424 | 0.00476064  | 0.000827829 | 0.005615701 |
| 0.00211998  | 0.006087403 | 0.003458445 | 0.002148845 | 0.003420835 | 0.005043046 | 0.006011317 | 0.006446502 | 0.005160455 | 0.006010599 | 0.007207158 |
| 0.002175622 | 0.004791184 | 0.003130916 | 0.004132697 | 0.002236524 | 0.003486175 | 0.003193532 | 0.004159695 | 0.003398779 | 0.00370787  | 0.004745325 |
| 0.007834659 | 0.004765707 | 0.004286049 | 0.004067534 | 0.001866225 | 0.004969851 | 0.002309648 | 0.00264028  | 0.004988269 | 0.002226803 | 0.00929322  |
| 0.007567379 | 0.006350351 | 0.003504435 | 0.001125406 | 0.001468166 | 0.00363765  | 0.006309884 | 0.007500167 | 0.003026286 | 0.004180595 | 0.006602177 |
| 0.004001639 | 0.003729465 | 0.003399405 | 0.003664387 | 0.002284809 | 0.002869064 | 0.004095918 | 0.002718873 | 0.003065313 | 0.003990244 | 0.011587747 |
| 0.004863952 | 0.003837359 | 0.003270474 | 0.002004969 | 0.002206807 | 0.003277706 | 0.00402999  | 0.002871463 | 0.003367491 | 0.00403728  | 0.011628942 |
| 0.006423467 | 0.012697487 | 0.005476902 | 0.002002083 | 0.004955246 | 0.008761496 | 0.005524683 | 0.005055885 | 0.010301191 | 0.007744044 | 0.00509965  |
| 0.004290274 | 0.007565732 | 0.009332604 | 0.00286617  | 0.006663203 | 0.003976062 | 0.00725874  | 0.004703447 | 0.006531871 | 0.007841599 | 0.010940236 |
| 0.00422035  | 0.006081307 | 0.018469936 | 0.001434656 | 0.003856431 | 0.004229257 | 0.008087603 | 0.004787502 | 0.006201178 | 0.006378345 | 0.017350738 |
| 0.004600984 | 0.003827675 | 0.007008756 | 0.003504212 | 0.003986212 | 0.002714282 | 0.006008504 | 0.003864198 | 0.002987929 | 0.012449472 | 0.007468667 |
| 0.007597549 | 0.005486988 | 0.007376946 | 0.002538324 | 0.004780657 | 0.004683644 | 0.007944764 | 0.007268589 | 0.00399273  | 0.006736541 | 0.004204824 |
| 0.005320243 | 0.007467357 | 0.007737313 | 0.003268789 | 0.004947752 | 0.005667205 | 0.008849441 | 0.006171989 | 0.005596757 | 0.00465715  | 0.004965504 |
| 0.004181172 | 0.005254033 | 0.020575249 | 0.00254066  | 0.001814237 | 0.004870143 | 0.001358861 | 0.012354748 | 0.007415594 | 0.002751379 | 0.002764312 |
| 0.006920206 | 0.006336812 | 0.005210346 | 0.004539372 | 0.007645173 | 0.00493537  | 0.010998265 | 0.006309298 | 0.007543287 | 0.003582234 | 0.011398387 |
| 0.008010652 | 0.003618465 | 0.004553829 | 0.003759009 | 0.011569883 | 0.010475941 | 0.012925515 | 0.004266469 | 0.011516521 | 0.007185406 | 0.004756093 |
| 0.004219563 | 0.010166598 | 0.008936245 | 0.003382405 | 0.007100361 | 0.007851842 | 0.015654482 | 0.006581063 | 0.006079074 | 0.010122099 | 0.004861325 |
| 0.004197708 | 0.010342208 | 0.011148593 | 0.002147788 | 0.005625673 | 0.007047589 | 0.016588086 | 0.006472333 | 0.006704812 | 0.010957894 | 0.005417266 |

| CP_32       | CP_33       | CP_34       | CP_35       | CP_36       | CP_37       | CP_38       | CP_39       | CP_40       | CP_41       | CP_42       |
|-------------|-------------|-------------|-------------|-------------|-------------|-------------|-------------|-------------|-------------|-------------|
| 0.007169057 | 0.008126604 | 0.007954363 | 0.008319256 | 0.00531731  | 0.010070812 | 0.007938782 | 0.005410011 | 0.002266828 | 0.008702399 | 0.004846428 |
| 0.006101873 | 0.007757872 | 0.007608407 | 0.007647902 | 0.007636269 | 0.015130166 | 0.008185172 | 0.002722606 | 0.002681385 | 0.006042505 | 0.004129938 |
| 0.007818038 | 0.009263085 | 0.008329879 | 0.009088873 | 0.006685989 | 0.010944891 | 0.009725961 | 0.003553139 | 0.002676564 | 0.004923761 | 0.003406398 |
| 0.006271318 | 0.008760252 | 0.00885694  | 0.00914676  | 0.008105456 | 0.012195374 | 0.008818105 | 0.003073529 | 0.002586411 | 0.006341604 | 0.003720491 |
| 0.007702715 | 0.008123721 | 0.008932197 | 0.006073868 | 0.00529099  | 0.011510832 | 0.009438981 | 0.003100837 | 0.003155547 | 0.003685898 | 0.002814214 |
| 0.009289548 | 0.008960103 | 0.009099305 | 0.007155959 | 0.005678321 | 0.012964852 | 0.011420237 | 0.002784682 | 0.003574163 | 0.003801295 | 0.002710627 |
| 0.008075278 | 0.00636339  | 0.005934109 | 0.005197595 | 0.003891233 | 0.007665457 | 0.006763538 | 0.003083248 | 0.002690638 | 0.003339606 | 0.002023902 |
| 0.009239393 | 0.008652759 | 0.007017431 | 0.005294126 | 0.003495549 | 0.011922832 | 0.01036345  | 0.002958719 | 0.003388715 | 0.003220714 | 0.002360229 |
| 0.009181562 | 0.011053926 | 0.005209438 | 0.006909453 | 0.002426571 | 0.005992532 | 0.007081998 | 0.004723869 | 0.001529342 | 0.004512059 | 0.002485886 |
| 0.007534002 | 0.006001088 | 0.005752144 | 0.005434229 | 0.003426011 | 0.007541769 | 0.007341899 | 0.002711333 | 0.002533421 | 0.002730532 | 0.001524675 |
| 0.009494554 | 0.005446273 | 0.005137232 | 0.006159997 | 0.003299039 | 0.006752067 | 0.006554771 | 0.003862603 | 0.00176689  | 0.003136096 | 0.001804152 |
| 0.010640426 | 0.008995562 | 0.007130002 | 0.004730614 | 0.003076412 | 0.015895474 | 0.008691648 | 0.005421252 | 0.007517774 | 0.005818105 | 0.003041135 |
| 0.010577726 | 0.009360664 | 0.008661119 | 0.00479991  | 0.003341401 | 0.011690372 | 0.008932088 | 0.005725873 | 0.007540422 | 0.005974926 | 0.003087235 |
| 0.005953398 | 0.009016446 | 0.00379338  | 0.006278501 | 0.003953905 | 0.008345731 | 0.01217984  | 0.0023671   | 0.006201368 | 0.0034438   | 0.005754438 |
| 0.006893768 | 0.005482366 | 0.005482006 | 0.008641558 | 0.001980105 | 0.007995525 | 0.006671837 | 0.004886515 | 0.006541617 | 0.001363005 | 0.004153642 |
| 0.009452781 | 0.007801138 | 0.006019608 | 0.004784584 | 0.003513107 | 0.008323792 | 0.007003722 | 0.003236017 | 0.003047477 | 0.003527147 | 0.001854846 |
| 0.01156256  | 0.010002384 | 0.006672378 | 0.004290704 | 0.003367519 | 0.009560579 | 0.008318975 | 0.003122457 | 0.003297384 | 0.00311257  | 0.00260765  |
| 0.011431813 | 0.010932577 | 0.006840792 | 0.004544141 | 0.002966532 | 0.009042147 | 0.009202927 | 0.002773489 | 0.003811963 | 0.002540694 | 0.002906201 |
| 0.00863348  | 0.005151544 | 0.005278094 | 0.004714004 | 0.002694831 | 0.008811001 | 0.009400479 | 0.002816921 | 0.004122609 | 0.003539071 | 0.002273009 |
| 0.009191004 | 0.008299414 | 0.005267187 | 0.00431472  | 0.002648118 | 0.007691809 | 0.00603743  | 0.002833885 | 0.004479436 | 0.002353622 | 0.001928012 |
| 0.009450155 | 0.008182331 | 0.005865745 | 0.004173174 | 0.002995108 | 0.008712254 | 0.006815603 | 0.003013272 | 0.00444927  | 0.002984848 | 0.001681813 |
| 0.007973002 | 0.006411092 | 0.007095331 | 0.005289385 | 0.001769556 | 0.009068226 | 0.010572124 | 0.002827537 | 0.006834133 | 0.001754564 | 0.002155118 |
| 0.00732646  | 0.009213047 | 0.008420437 | 0.006132854 | 0.00241077  | 0.007190082 | 0.008530924 | 0.00395054  | 0.004745078 | 0.001643902 | 0.002431646 |
| 0.005999002 | 0.003382378 | 0.005531385 | 0.015038514 | 0.005272023 | 0.00785449  | 0.004633014 | 0.005246491 | 0.00250729  | 0.004133167 | 0.01345197  |
| 0.004897321 | 0.003921639 | 0.004279167 | 0.010893034 | 0.005496492 | 0.006129804 | 0.003424539 | 0.004547436 | 0.002452678 | 0.004743565 | 0.011901759 |
| 0.005420591 | 0.004519318 | 0.005409652 | 0.006427688 | 0.004165788 | 0.009875569 | 0.006967088 | 0.003930091 | 0.004232553 | 0.005539778 | 0.00795105  |
| 0.006732016 | 0.004964584 | 0.004051512 | 0.004068623 | 0.005712474 | 0.006709134 | 0.00566413  | 0.004624292 | 0.004208387 | 0.003149259 | 0.005178897 |
| 0.005538736 | 0.004209583 | 0.004321807 | 0.010045965 | 0.003760768 | 0.006753529 | 0.004907905 | 0.004964666 | 0.003222298 | 0.002970744 | 0.007006776 |
| 0.008724625 | 0.004039032 | 0.004705178 | 0.009758075 | 0.006324984 | 0.010114247 | 0.004931797 | 0.003915974 | 0.005431116 | 0.003640246 | 0.006787062 |
| 0.008350615 | 0.012144208 | 0.003580199 | 0.011024445 | 0.004124448 | 0.004981727 | 0.007091841 | 0.004715965 | 0.002511404 | 0.005381348 | 0.008510417 |
| 0.008865335 | 0.004708087 | 0.005807511 | 0.005899286 | 0.006801515 | 0.006669649 | 0.004263522 | 0.003450187 | 0.003309196 | 0.008102971 | 0.007005763 |
| 0.009155298 | 0.004991032 | 0.00613951  | 0.006113047 | 0.005096575 | 0.007085759 | 0.004178393 | 0.003375713 | 0.003262984 | 0.008471728 | 0.007056967 |
| 0.005572821 | 0.005424804 | 0.005871602 | 0.004373146 | 0.003799352 | 0.008495512 | 0.005805289 | 0.003566868 | 0.003637476 | 0.004739195 | 0.002682162 |
| 0.007623109 | 0.007532274 | 0.005299976 | 0.005633891 | 0.003113684 | 0.006820917 | 0.00738327  | 0.002812813 | 0.001863634 | 0.003362394 | 0.002213432 |
| 0.006348629 | 0.006314632 | 0.005570535 | 0.004972966 | 0.00375486  | 0.007791025 | 0.005622388 | 0.002888036 | 0.002392359 | 0.004120074 | 0.002931488 |
| 0.008488396 | 0.007750261 | 0.005634096 | 0.005499472 | 0.002506325 | 0.007914456 | 0.00716971  | 0.00300823  | 0.00279688  | 0.002847694 | 0.004120293 |
| 0.008046844 | 0.007968995 | 0.005912771 | 0.003795958 | 0.003254668 | 0.008387026 | 0.007342109 | 0.005403861 | 0.002794917 | 0.003610273 | 0.003299131 |
| 0.00571878  | 0.005510794 | 0.00543669  | 0.005682514 | 0.004581163 | 0.008370478 | 0.006505333 | 0.003666543 | 0.002845099 | 0.003783318 | 0.00417727  |
| 0.005533058 | 0.004849493 | 0.004947213 | 0.004440207 | 0.003755456 | 0.005797052 | 0.005052294 | 0.003222059 | 0.003048998 | 0.003809507 | 0.003771247 |
| 0.005181452 | 0.00426582  | 0.004331754 | 0.004385658 | 0.003433607 | 0.004976419 | 0.004484909 | 0.003708295 | 0.00309911  | 0.003928901 | 0.003589454 |
| 0.006329583 | 0.005680148 | 0.005630527 | 0.004818759 | 0.003752983 | 0.00653339  | 0.00590716  | 0.003134925 | 0.002877377 | 0.003316074 | 0.002472514 |
| 0.006363705 | 0.006433197 | 0.004860829 | 0.004164262 | 0.003386971 | 0.006096212 | 0.005300807 | 0.003242145 | 0.002951179 | 0.003628605 | 0.00265553  |
| 0.006254501 | 0.00423548  | 0.004776722 | 0.004116015 | 0.004098096 | 0.007721797 | 0.005184918 | 0.002238987 | 0.004128901 | 0.004228901 | 0.00402739  |
| 0.006362338 | 0.00375371  | 0.005742101 | 0.005608943 | 0.004923442 | 0.006851168 | 0.003561969 | 0.003093006 | 0.003658733 | 0.004237554 | 0.004545803 |
| 0.005046318 | 0.004691823 | 0.005877538 | 0.005245944 | 0.004104465 | 0.004978028 | 0.003654831 | 0.002750762 | 0.00308489  | 0.002947416 | 0.004537131 |
| 0.008155389 | 0.007541373 | 0.005543202 | 0.004208509 | 0.003291031 | 0.006978118 | 0.006557916 | 0.002514559 | 0.005056734 | 0.001232767 | 0.002069466 |
| 0.00644095  | 0.004974276 | 0.005065047 | 0.004760657 | 0.003606344 | 0.006123002 | 0.00487899  | 0.003433722 | 0.003195395 | 0.003924615 | 0.003661151 |
| 0.006871909 | 0.005932857 | 0.00515614  | 0.003940662 | 0.00291145  | 0.006390429 | 0.005320949 | 0.002938016 | 0.004233611 | 0.003064238 | 0.002764223 |
| 0.007253587 | 0.006727908 | 0.005228106 | 0.0041043   | 0.00317421  | 0.006779842 | 0.005849259 | 0.003007655 | 0.003072893 | 0.003758942 | 0.002504366 |
| 0.006176243 | 0.007335631 | 0.004562132 | 0.004627599 | 0.0027431   | 0.005313973 | 0.004625421 | 0.003011064 | 0.003933392 | 0.002248602 | 0.004090098 |
| 0.008443523 | 0.005674786 | 0.004454866 | 0.005291643 | 0.002522538 | 0.00588411  | 0.008098218 | 0.002799    | 0.003352782 | 0.002622123 | 0.004510922 |
| 0.007376893 | 0.005780409 | 0.007445251 | 0.005593555 | 0.00480696  | 0.007568252 | 0.007865718 | 0.005436953 | 0.004628421 | 0.003183159 | 0.005256923 |
| 0.005444641 | 0.004701092 | 0.004847407 | 0.004721946 | 0.003357317 | 0.005833153 | 0.00859278  | 0.00324475  | 0.006201456 | 0.004385368 | 0.006409718 |
| 0.006482197 | 0.007421219 | 0.006169848 | 0.004357453 | 0.002281496 | 0.0034576   | 0.00925139  | 0.005141673 | 0.010376018 | 0.003103654 | 0.003934237 |
| 0.004062386 | 0.004590966 | 0.004827263 | 0.005980578 | 0.005262214 | 0.002441257 | 0.005768221 | 0.007189501 | 0.009280464 | 0.00461067  | 0.005594931 |
| 0.003756277 | 0.003984537 | 0.003952944 | 0.003413478 | 0.002165817 | 0.004037653 | 0.004123861 | 0.00335174  | 0.006275749 | 0.003429369 | 0.005809154 |
| 0.004082509 | 0.004064937 | 0.004861905 | 0.004169834 | 0.002383331 | 0.004047997 | 0.004606283 | 0.003877942 | 0.005342449 | 0.002725661 | 0.007999484 |
| 0.005145241 | 0.004927683 | 0.004501638 | 0.005728354 | 0.005141939 | 0.00337723  | 0.005650072 | 0.005661161 | 0.006064938 | 0.004052997 | 0.006177264 |
| 0.005185297 | 0.004631287 | 0.004345518 | 0.004606745 | 0.003453431 | 0.003744204 | 0.005047716 | 0.004127661 | 0.005851523 | 0.00320056  | 0.005416353 |
| 0.004379871 | 0.004528209 | 0.004125606 | 0.005244235 | 0.003557772 | 0.004090182 | 0.004170556 | 0.003843361 | 0.003481446 | 0.002867011 | 0.005222241 |
| 0.005229487 | 0.004114724 | 0.004367855 | 0.004491135 | 0.00358363  | 0.004868107 | 0.004047787 | 0.003134759 | 0.003635827 | 0.002973754 | 0.005041636 |
| 0.004311206 | 0.003344323 | 0.003824104 | 0.005364296 | 0.003768478 | 0.00401026  | 0.003717433 | 0.003775154 | 0.003792961 | 0.003589992 | 0.006534161 |
| 0.005173414 | 0.004029568 | 0.00480195  | 0.004897276 | 0.003649175 | 0.004709631 | 0.004673047 | 0.004338414 | 0.004098093 | 0.005051281 | 0.005535975 |
| 0.005802862 | 0.004103753 | 0.005555129 | 0.005939708 | 0.004609135 | 0.004290659 | 0.004245908 | 0.005700396 | 0.004052383 | 0.004167508 | 0.004747984 |
| 0.007152279 | 0.010937024 | 0.004723691 | 0.003288918 | 0.002169155 | 0.006588786 | 0.005352856 | 0.003171929 | 0.005647683 | 0.002233444 | 0.003969244 |
| 0.008550672 | 0.00777582  | 0.005440075 | 0.003080464 | 0.002267002 | 0.005862095 | 0.007134961 | 0.003366531 | 0.006750422 | 0.002198779 | 0.005178407 |
| 0.008057799 | 0.008430939 | 0.005458684 | 0.003072906 | 0.002350091 | 0.006994263 | 0.008395594 | 0.002631701 | 0.010017824 | 0.003480048 | 0.0038379   |
| 0.006191382 | 0.006362274 | 0.008133899 | 0.003606812 | 0.001831122 | 0.005431381 | 0.006947293 | 0.002798486 | 0.009414908 | 0.005363168 | 0.00663289  |
| 0.004439    |             |             |             |             |             |             |             |             |             |             |

|             |              |             |             |             |             |             |             |             |             |             |
|-------------|--------------|-------------|-------------|-------------|-------------|-------------|-------------|-------------|-------------|-------------|
| 0.004520821 | 0.005284584  | 0.004889076 | 0.00237031  | 0.002957729 | 0.006270889 | 0.003381954 | 0.007788113 | 0.001604485 | 0.00509703  | 0.001873112 |
| 0.00667911  | 0.005519809  | 0.006195439 | 0.002233679 | 0.00206708  | 0.005717508 | 0.004928297 | 0.008212429 | 0.002267219 | 0.003516502 | 0.001308481 |
| 0.005180931 | 0.0090006459 | 0.005326426 | 0.001839481 | 0.001944443 | 0.010586674 | 0.006091209 | 0.006623248 | 0.005182536 | 0.006628236 | 0.003397584 |
| 0.003133824 | 0.004499302  | 0.004534774 | 0.002224485 | 0.004150551 | 0.00773498  | 0.004468787 | 0.009565614 | 0.003707893 | 0.005935141 | 0.001639934 |
| 0.009247825 | 0.007730258  | 0.00658704  | 0.001925404 | 0.001506814 | 0.006439811 | 0.00593271  | 0.004878372 | 0.013180421 | 0.005088739 | 0.002984714 |
| 0.007657082 | 0.007701852  | 0.005934967 | 0.002021589 | 0.001359729 | 0.006886369 | 0.005990892 | 0.005515472 | 0.01112227  | 0.005592646 | 0.003221979 |
| 0.003428574 | 0.003902847  | 0.002422096 | 0.002922547 | 0.003955462 | 0.004880331 | 0.002717515 | 0.002817079 | 0.00249781  | 0.007407964 | 0.003527982 |
| 0.002814265 | 0.002951468  | 0.004142656 | 0.001969396 | 0.003800745 | 0.00646578  | 0.001365647 | 0.005115405 | 0.005427897 | 0.009537507 | 0.002435078 |
| 0.004308903 | 0.007566957  | 0.003657463 | 0.003449979 | 0.003269653 | 0.008670764 | 0.00387372  | 0.005260298 | 0.004088382 | 0.003373058 | 0.002916601 |
| 0.003129655 | 0.003205033  | 0.004384249 | 0.002452396 | 0.002816753 | 0.007296318 | 0.003219584 | 0.005406339 | 0.00608589  | 0.003243148 | 0.001428606 |
| 0.003734269 | 0.003459138  | 0.005177341 | 0.002055623 | 0.00225589  | 0.007917403 | 0.003930928 | 0.006209826 | 0.005070206 | 0.003153413 | 0.001728614 |
| 0.012604483 | 0.005701802  | 0.006512323 | 0.002299108 | 0.002655708 | 0.009025157 | 0.007680655 | 0.002392038 | 0.018101733 | 0.003281727 | 0.001922689 |
| 0.011029695 | 0.011694179  | 0.007296053 | 0.001954116 | 0.002440886 | 0.008262408 | 0.012253102 | 0.002760446 | 0.018147891 | 0.00351982  | 0.001623253 |
| 0.012144364 | 0.014049385  | 0.007149761 | 0.001883373 | 0.001921558 | 0.008546463 | 0.012266056 | 0.00281076  | 0.020784326 | 0.002706014 | 0.001613961 |
| 0.00911342  | 0.009025888  | 0.007767926 | 0.002011566 | 0.002559084 | 0.009310968 | 0.011396524 | 0.00329212  | 0.012947995 | 0.00361064  | 0.002205031 |
| 0.007018955 | 0.008418876  | 0.00659449  | 0.002285283 | 0.002291083 | 0.007711887 | 0.011044556 | 0.002988911 | 0.012445926 | 0.003721526 | 0.002174209 |
| 0.008174177 | 0.012609541  | 0.006044527 | 0.001940008 | 0.002939885 | 0.005582878 | 0.012751182 | 0.002932911 | 0.012726618 | 0.002719492 | 0.001509208 |
| 0.009061582 | 0.011674195  | 0.007038518 | 0.002014491 | 0.003676164 | 0.008329627 | 0.01023644  | 0.003959192 | 0.010285268 | 0.001547616 | 0.001289218 |
| 0.007281954 | 0.008072866  | 0.007179503 | 0.002668242 | 0.003281537 | 0.007220486 | 0.009279095 | 0.003355786 | 0.013907992 | 0.003408379 | 0.00216407  |
| 0.008024525 | 0.010641232  | 0.006776317 | 0.003600371 | 0.003464489 | 0.010104967 | 0.010519632 | 0.003365769 | 0.012958174 | 0.002749815 | 0.001600046 |
| 0.00981062  | 0.011910299  | 0.00664872  | 0.002628199 | 0.002528429 | 0.008337648 | 0.010975472 | 0.002979117 | 0.015213843 | 0.002667157 | 0.001817514 |
| 0.008513452 | 0.011247255  | 0.006923771 | 0.003007153 | 0.002833845 | 0.009177196 | 0.010757206 | 0.003548227 | 0.01260672  | 0.002655679 | 0.00175022  |
| 0.011252064 | 0.011251546  | 0.00655337  | 0.002682293 | 0.002009836 | 0.008020222 | 0.010251459 | 0.002403989 | 0.016488573 | 0.002932653 | 0.001921984 |
| 0.008246708 | 0.011773038  | 0.00693369  | 0.003030311 | 0.003116515 | 0.009615631 | 0.01042473  | 0.003028136 | 0.01159749  | 0.001868248 | 0.001904661 |
| 0.008254336 | 0.012520141  | 0.006536828 | 0.002613065 | 0.002651929 | 0.008807204 | 0.011458919 | 0.00271144  | 0.012583726 | 0.002610421 | 0.002062978 |
| 0.008914853 | 0.011782846  | 0.006371943 | 0.002991098 | 0.002288703 | 0.00774277  | 0.011156714 | 0.002657792 | 0.013532451 | 0.002718376 | 0.0020618   |
| 0.003988251 | 0.003024418  | 0.005014609 | 0.00302928  | 0.002942707 | 0.00460127  | 0.004196289 | 0.025505724 | 0.021723483 | 0.008457833 | 0.004594901 |
| 0.007794239 | 0.006882557  | 0.007001138 | 0.001858207 | 0.004523214 | 0.00520675  | 0.008682881 | 0.006756962 | 0.009422357 | 0.006997753 | 0.004592325 |
| 0.003842407 | 0.003686746  | 0.006369096 | 0.000782639 | 0.001160002 | 0.009164188 | 0.0028029   | 0.005073721 | 0.008110676 | 0.012955498 | 0.005147456 |
| 0.008680408 | 0.005445154  | 0.006518254 | 0.007456067 | 0.009657217 | 0.003152703 | 0.005625339 | 0.00650992  | 0.007015468 | 0.011721424 | 0.01173001  |
| 0.003612102 | 0.002519608  | 0.007163298 | 0.010752461 | 0.004914596 | 0.002591445 | 0.006066674 | 0.010127629 | 0.013036042 | 0.008692458 | 0.004998524 |
| 0.002679404 | 0.001863797  | 0.006989805 | 0.009826718 | 0.018346817 | 0.00202752  | 0.002819403 | 0.01536311  | 0.004162432 | 0.006080914 | 0.00615173  |
| 0.002892028 | 0.001901787  | 0.005727357 | 0.015598201 | 0.014922139 | 0.001137849 | 0.002600438 | 0.01475415  | 0.005962771 | 0.00806134  | 0.011825874 |
| 0.002458723 | 0.002580942  | 0.004802071 | 0.013685497 | 0.01861106  | 0.002215667 | 0.003062226 | 0.010211608 | 0.006424682 | 0.014538271 | 0.010306744 |
| 0.003956429 | 0.005407688  | 0.011035934 | 0.011554987 | 0.015891283 | 0.003206053 | 0.004907416 | 0.007339048 | 0.007388379 | 0.007232394 | 0.009810863 |
| 0.00346383  | 0.004314992  | 0.007965824 | 0.011637589 | 0.017566643 | 0.002783771 | 0.003457516 | 0.008413728 | 0.004376741 | 0.010196956 | 0.013064456 |
| 0.005972286 | 0.005599968  | 0.007101601 | 0.015065978 | 0.016710427 | 0.002578057 | 0.004964209 | 0.007195551 | 0.005179823 | 0.005585521 | 0.010954422 |
| 0.007903562 | 0.011440345  | 0.006269883 | 0.013436219 | 0.018797279 | 0.001547018 | 0.001963744 | 0.007879572 | 0.008422036 | 0.010200155 | 0.008244602 |
| 0.01524701  | 0.017271071  | 0.007940242 | 0.011441621 | 0.019715437 | 0.00244835  | 0.002438274 | 0.00580569  | 0.0055234   | 0.01145162  | 0.007904745 |
| 0.003939258 | 0.002270023  | 0.008768556 | 0.014186765 | 0.008857722 | 0.003643213 | 0.003438863 | 0.00796285  | 0.003683557 | 0.007237707 | 0.012324136 |
| 0.007699143 | 0.006701391  | 0.005777004 | 0.009693981 | 0.012283565 | 0.00281565  | 0.006331295 | 0.012106211 | 0.004862553 | 0.010246827 | 0.01396509  |
| 0.007438965 | 0.006360632  | 0.004865067 | 0.013986501 | 0.023077258 | 0.003775272 | 0.005715408 | 0.010695726 | 0.005005008 | 0.008527069 | 0.013391925 |
| 0.003152788 | 0.002044723  | 0.00443954  | 0.016918111 | 0.01879004  | 0.002119126 | 0.00260756  | 0.009099607 | 0.004875934 | 0.015758168 | 0.014756165 |
| 0.004478939 | 0.002552678  | 0.003614018 | 0.010111024 | 0.019454311 | 0.003758005 | 0.003980368 | 0.006680748 | 0.004483165 | 0.015472239 | 0.003966975 |
| 0.004647869 | 0.002531814  | 0.003917328 | 0.010987741 | 0.017755223 | 0.002920706 | 0.004482949 | 0.006902998 | 0.004261473 | 0.014927335 | 0.032178438 |
| 0.001676036 | 0.001425759  | 0.01224261  | 0.003854238 | 0.011187889 | 0.005234327 | 0.003414964 | 0.009191266 | 0.005193383 | 0.011933376 | 0.008480285 |
| 0.002827858 | 0.00178665   | 0.014409458 | 0.002490736 | 0.008424178 | 0.006149852 | 0.004209783 | 0.005741607 | 0.007370012 | 0.007421746 | 0.007253267 |
| 0.002254597 | 0.006994135  | 0.002160244 | 0.009687056 | 0.010154005 | 0.001290439 | 0.006000411 | 0.007821774 | 0.002411403 | 0.021645936 | 0.017523227 |
| 0.003379646 | 0.005835441  | 0.003482658 | 0.024392441 | 0.003780748 | 0.003412272 | 0.004814373 | 0.008364293 | 0.004625848 | 0.010545338 | 0.009567687 |
| 0.002253646 | 0.002108928  | 0.00590284  | 0.012413624 | 0.009209702 | 0.003495787 | 0.004320188 | 0.020749206 | 0.0039072   | 0.007412562 | 0.008798502 |
| 0.008976382 | 0.015121175  | 0.013109942 | 0.006425185 | 0.014597377 | 0.005401557 | 0.005719504 | 0.002798924 | 0.007251216 | 0.009158744 | 0.004194484 |
| 0.01279358  | 0.010824778  | 0.013005121 | 0.007026343 | 0.002298997 | 0.008658951 | 0.004398546 | 0.004306349 | 0.005248696 | 0.001508021 | 0.007828622 |
| 0.006206378 | 0.007450883  | 0.003256383 | 0.000285151 | 0.005217092 | 0.01796143  | 0.008567936 | 0.009468259 | 0.006729775 | 0.007029655 | 0.003477504 |
| 0.003507459 | 0.005493453  | 0.0056444   | 0.000666168 | 0.004765262 | 0.00361173  | 0.008631965 | 0.003242547 | 0.004137458 | 0.007166657 | 0.007705777 |
| 0.003266504 | 0.006131066  | 0.00734438  | 0.000486443 | 0.004872562 | 0.00454946  | 0.006394104 | 0.0037974   | 0.006111713 | 0.007804418 | 0.005821256 |
| 0.006395577 | 0.005595641  | 0.006027932 | 0.013393483 | 0.002588516 | 0.006509378 | 0.006166937 | 0.004140735 | 0.008205736 | 0.003163798 | 0.003924666 |
| 0.018671594 | 0.01722676   | 0.010536564 | 0.004935115 | 0.005936429 | 0.007319607 | 0.012621427 | 0.000721825 | 0.013218437 | 0.006294869 | 0.00640302  |
| 0.007485981 | 0.008481955  | 0.010331589 | 0.018211633 | 0.003298818 | 0.006161396 | 0.005217513 | 0.007570003 | 0.009886622 | 0.002739526 | 0.00777154  |
| 0.004008171 | 0.014121107  | 0.00696439  | 0.00187677  | 0.004500252 | 0.005014964 | 0.006202664 | 0.006468385 | 0.00371751  | 0.003915872 | 0.005904678 |
| 0.005180469 | 0.00573386   | 0.010385683 | 0.004053387 | 0.003951486 | 0.007048925 | 0.00994587  | 0.010123735 | 0.005367408 | 0.005974134 | 0.01296684  |
| 0.006830893 | 0.007867172  | 0.005100941 | 0.006355168 | 0.001604715 | 0.002805314 | 0.00695594  | 0.005887363 | 0.01344283  | 0.002851127 | 0.006347219 |
| 0.004238769 | 0.004165077  | 0.032363626 | 0.024721747 | 0.004185412 | 0.004896341 | 0.005428474 | 0.003930177 | 0.003105167 | 0.032983955 | 0.005958963 |
| 0.001513581 | 0.002047377  | 0.002072261 | 0.002124933 | 0.00430681  | 0.004477229 | 0.002616039 | 0.009813463 | 0.002090956 | 0.006201878 | 0.005718076 |
| 0.003182934 | 0.00292831   | 0.002707977 | 0.001232865 | 0.00781776  | 0.005941893 | 0.003113159 | 0.005689679 | 0.002060571 | 0.00731802  | 0.009155523 |
| 0.002128463 | 0.001399859  | 0.002924483 | 0.001614221 | 0.006953371 | 0.005118636 | 0.002030895 | 0.004348289 | 0.002563673 | 0.028703463 | 0.008039728 |
| 0.003753067 | 0.004422308  | 0.004514462 | 0.003577628 | 0.00726487  | 0.00211865  | 0.005145276 | 0.008042615 | 0.004218973 | 0.006508486 | 0.00496502  |
| 0.003961593 | 0.00387025   | 0.002399094 | 0.000660915 | 0.005642434 | 0.001994962 | 0.003888994 | 0.025481726 | 0.00350627  | 0.0036084   | 0.012840499 |
| 0.001656275 | 0.003611375  | 0.002947676 | 0.001157849 | 0.004195348 | 0.005669235 | 0.005113526 | 0.004947831 | 0.001900595 | 0.006395529 | 0.005891806 |
| 0.002009231 | 0.001866438  | 0.003367913 | 0.001454426 | 0.002935408 | 0.003754063 | 0.002749568 | 0.004456812 |             |             |             |

|             |             |             |             |             |             |             |             |             |             |             |
|-------------|-------------|-------------|-------------|-------------|-------------|-------------|-------------|-------------|-------------|-------------|
| 0.002750222 | 0.002954734 | 0.003450864 | 0.001057936 | 0.006370847 | 0.003595955 | 0.002637058 | 0.003662894 | 0.005042235 | 0.00635045  | 0.006898187 |
| 0.004268064 | 0.002715453 | 0.003785069 | 0.001711165 | 0.004251858 | 0.004305437 | 0.006140829 | 0.00401313  | 0.00795701  | 0.005236986 | 0.004956567 |
| 0.003850629 | 0.002657586 | 0.003221382 | 0.005587921 | 0.003826047 | 0.003042751 | 0.004664863 | 0.004991741 | 0.004458411 | 0.00569867  | 0.004344977 |
| 0.003746099 | 0.002428979 | 0.003139514 | 0.00556762  | 0.005005284 | 0.002251949 | 0.003962124 | 0.004058212 | 0.003734233 | 0.005057699 | 0.004464207 |
| 0.001234573 | 0.002422174 | 0.001888507 | 0.002242288 | 0.01178704  | 0.004952033 | 0.000834048 | 0.005546213 | 0.002492984 | 0.004480003 | 0.0081071   |
| 0.00138377  | 0.000797102 | 0.003509056 | 0.011371412 | 0.018880885 | 0.002657035 | 0.001726912 | 0.012262251 | 0.002772444 | 0.003099076 | 0.012101276 |
| 0.001864039 | 0.001337036 | 0.003054544 | 0.004536714 | 0.019508455 | 0.003418839 | 0.001727372 | 0.008811561 | 0.002050065 | 0.00347428  | 0.024643115 |
| 0.001583323 | 0.001449078 | 0.003435215 | 0.004229273 | 0.016509864 | 0.003443905 | 0.00212915  | 0.00948701  | 0.002046031 | 0.003831148 | 0.023851163 |
| 0.002135583 | 0.001014066 | 0.007622983 | 0.004997032 | 0.015775981 | 0.004203988 | 0.001612368 | 0.013386689 | 0.010852991 | 0.010739796 | 0.005600356 |
| 0.001521186 | 0.001265297 | 0.004469692 | 0.001196455 | 0.017641355 | 0.010616778 | 0.00245455  | 0.008918969 | 0.007778239 | 0.004651659 | 0.009583688 |
| 0.001333946 | 0.001243763 | 0.0039671   | 0.00634419  | 0.020127216 | 0.003218896 | 0.002026795 | 0.0129943   | 0.008617025 | 0.004923732 | 0.007881745 |
| 0.001798921 | 0.001722    | 0.00319716  | 0.010283391 | 0.005734962 | 0.002126286 | 0.002349267 | 0.010063406 | 0.002140952 | 0.004849198 | 0.047481822 |
| 0.000337948 | 0.001332748 | 0.007907263 | 0.00310812  | 0.005429861 | 0.001477676 | 0.004354458 | 0.005411249 | 0.004265368 | 0.002073252 | 0.003277213 |
| 0.003908137 | 0.003199936 | 0.003281903 | 0.005473069 | 0.002772913 | 0.002337727 | 0.004445599 | 0.00476066  | 0.00362113  | 0.00331371  | 0.003780666 |
| 0.001395121 | 0.00249108  | 0.004168888 | 0.006204668 | 0.001783136 | 0.001129028 | 0.002120733 | 0.013388019 | 0.002377489 | 0.007967052 | 0.007307217 |
| 0.005935884 | 0.006124936 | 0.003196702 | 0.009669102 | 0.002840564 | 0.000903639 | 0.004047778 | 0.007973226 | 0.004826308 | 0.002318713 | 0.001213149 |
| 0.003950188 | 0.003084735 | 0.005050447 | 0.00266331  | 0.002074314 | 0.005561319 | 0.00512415  | 0.016173466 | 0.008293578 | 0.003298349 | 0.001100443 |
| 0.002574737 | 0.001818941 | 0.007454006 | 0.005508537 | 0.003967799 | 0.002362934 | 0.004716048 | 0.011134221 | 0.01101792  | 0.004676351 | 0.001159177 |
| 0.002137189 | 0.001457434 | 0.006484964 | 0.006633026 | 0.004124751 | 0.002628346 | 0.003866669 | 0.013184223 | 0.014470361 | 0.004280519 | 0.001195767 |

| CP_43       | CP_44        | CP_45        | CP_46        | CP_47       | CP_48        | CP_49       | CP_50       | CP_51       | CP_52       | CP_53       |
|-------------|--------------|--------------|--------------|-------------|--------------|-------------|-------------|-------------|-------------|-------------|
| 0.004769068 | 0.004278958  | 0.006998095  | 0.010858282  | 0.001091164 | 0.004501546  | 0.007804494 | 0.003970502 | 0.00275894  | 0.006443978 | 0.003454809 |
| 0.003419833 | 0.004024416  | 0.00775409   | 0.01108319   | 0.001429425 | 0.003667882  | 0.00491451  | 0.003067225 | 0.008400043 | 0.004668545 | 0.003846992 |
| 0.003444448 | 0.003741043  | 0.006188253  | 0.007401738  | 0.001422669 | 0.003243327  | 0.004697953 | 0.003318897 | 0.003086674 | 0.005406161 | 0.004824031 |
| 0.003635755 | 0.004052581  | 0.007395026  | 0.010784407  | 0.001559635 | 0.003454984  | 0.004767201 | 0.00312496  | 0.003236724 | 0.005074917 | 0.004490557 |
| 0.002395173 | 0.003487364  | 0.006591192  | 0.005708305  | 0.001632465 | 0.002883372  | 0.003988806 | 0.003424569 | 0.00372055  | 0.004995117 | 0.003864352 |
| 0.002503584 | 0.003760632  | 0.006517166  | 0.004805894  | 0.001113025 | 0.002692567  | 0.004627577 | 0.00359851  | 0.002956579 | 0.005531938 | 0.004346123 |
| 0.001970052 | 0.003164147  | 0.007174627  | 0.00718499   | 0.001594954 | 0.003257807  | 0.004204719 | 0.004898881 | 0.004227873 | 0.00608164  | 0.003201417 |
| 0.002005005 | 0.002852674  | 0.006224122  | 0.006395859  | 0.001478463 | 0.002770294  | 0.004677867 | 0.004270152 | 0.004615079 | 0.00666426  | 0.003682229 |
| 0.002591719 | 0.003773332  | 0.006067372  | 0.00727515   | 0.000690674 | 0.00334242   | 0.005419121 | 0.006610734 | 0.003308921 | 0.005077605 | 0.004547433 |
| 0.001824083 | 0.003211172  | 0.008856138  | 0.00644133   | 0.0010869   | 0.00303156   | 0.003579215 | 0.004449542 | 0.002848528 | 0.004624281 | 0.003078419 |
| 0.001927427 | 0.003836825  | 0.006802389  | 0.007176482  | 0.001060392 | 0.002990155  | 0.005169246 | 0.005944703 | 0.002684505 | 0.00442398  | 0.004581854 |
| 0.002973273 | 0.011470242  | 0.002586911  | 0.01027951   | 0.001767075 | 0.001990654  | 0.001949429 | 0.010785862 | 0.017808552 | 0.006717537 | 0.008192162 |
| 0.003060704 | 0.009315232  | 0.002716909  | 0.010840377  | 0.001774099 | 0.002139669  | 0.001632827 | 0.011100603 | 0.018303986 | 0.00641349  | 0.008377781 |
| 0.005487189 | 0.009125806  | 0.005968983  | 0.010546326  | 0.005118755 | 0.002752246  | 0.004781737 | 0.008753444 | 0.005827864 | 0.012211681 | 0.003767055 |
| 0.004214356 | 0.003270302  | 0.00437208   | 0.0047378617 | 0.003478617 | 0.0026159013 | 0.004901723 | 0.003580999 | 0.007765142 | 0.006586343 | 0.003741611 |
| 0.001739388 | 0.003571733  | 0.006734761  | 0.008329131  | 0.002237306 | 0.002937317  | 0.004345093 | 0.004981564 | 0.005268105 | 0.007497199 | 0.003795788 |
| 0.002229607 | 0.003157424  | 0.007378775  | 0.010362462  | 0.002053568 | 0.002596813  | 0.003880944 | 0.004047623 | 0.005913445 | 0.008437064 | 0.00347104  |
| 0.002916201 | 0.002842081  | 0.006969129  | 0.009374199  | 0.002100979 | 0.00224253   | 0.00327672  | 0.004441996 | 0.005350171 | 0.009165469 | 0.003003375 |
| 0.002437221 | 0.00312703   | 0.005470949  | 0.009405073  | 0.002438873 | 0.002514524  | 0.003548012 | 0.004500131 | 0.005644485 | 0.006839897 | 0.003576536 |
| 0.001848954 | 0.0037928    | 0.005517027  | 0.007717412  | 0.002724468 | 0.002705249  | 0.003930331 | 0.004766689 | 0.006182492 | 0.007616715 | 0.003680403 |
| 0.001646513 | 0.003540403  | 0.005865651  | 0.008122096  | 0.002304282 | 0.00300661   | 0.003979587 | 0.004744153 | 0.006319768 | 0.007553509 | 0.003472755 |
| 0.001934409 | 0.002536496  | 0.004067825  | 0.005310416  | 0.003884297 | 0.002126825  | 0.004281245 | 0.0066757   | 0.007217491 | 0.011188764 | 0.004895054 |
| 0.002394715 | 0.003294374  | 0.005056531  | 0.005055495  | 0.004206229 | 0.001899843  | 0.002894127 | 0.006046771 | 0.00964008  | 0.007994496 | 0.004453322 |
| 0.012589043 | 0.004679155  | 0.008921388  | 0.019217273  | 0.005564388 | 0.004026612  | 0.00447883  | 0.007907875 | 0.007820601 | 0.006525869 | 0.003082682 |
| 0.010787511 | 0.003578856  | 0.009999526  | 0.016253076  | 0.005622546 | 0.003851837  | 0.003155072 | 0.005555329 | 0.005473646 | 0.006566548 | 0.003808082 |
| 0.007823908 | 0.0034075281 | 0.00559088   | 0.013754263  | 0.002526649 | 0.001755832  | 0.006056908 | 0.007501026 | 0.011645416 | 0.00366354  | 0.003561349 |
| 0.005311317 | 0.006717267  | 0.005084387  | 0.008180119  | 0.002575509 | 0.004064471  | 0.006652083 | 0.006804304 | 0.00804374  | 0.006545899 | 0.004201756 |
| 0.006578555 | 0.003399923  | 0.005297048  | 0.00880549   | 0.005586116 | 0.002454373  | 0.002738964 | 0.006335916 | 0.007863946 | 0.006966303 | 0.003219825 |
| 0.006512315 | 0.003959776  | 0.005285064  | 0.009125762  | 0.002899307 | 0.001364249  | 0.002926998 | 0.008559215 | 0.010375406 | 0.008714288 | 0.004908342 |
| 0.007849222 | 0.003091168  | 0.00495043   | 0.003384758  | 0.008323954 | 0.001730089  | 0.00412909  | 0.003463182 | 0.023515781 | 0.005651063 | 0.004797025 |
| 0.006955031 | 0.003341589  | 0.004839924  | 0.011328284  | 0.00969516  | 0.006502524  | 0.007846554 | 0.004076283 | 0.010105374 | 0.00611465  | 0.002416824 |
| 0.00702273  | 0.003599208  | 0.004590408  | 0.012196415  | 0.010624549 | 0.006475263  | 0.008239506 | 0.004439131 | 0.010365364 | 0.006361872 | 0.002353843 |
| 0.008458508 | 0.0034107559 | 0.010439189  | 0.010322149  | 0.000773073 | 0.003498164  | 0.005366353 | 0.003883888 | 0.005192925 | 0.004727911 | 0.002770424 |
| 0.002211472 | 0.002890243  | 0.008047629  | 0.007169337  | 0.000814632 | 0.003146     | 0.003901836 | 0.00464576  | 0.003079272 | 0.004247506 | 0.003275793 |
| 0.003335026 | 0.003050229  | 0.008126321  | 0.007902244  | 0.000997405 | 0.003505505  | 0.004152645 | 0.004050067 | 0.003577894 | 0.004130522 | 0.002699368 |
| 0.003867837 | 0.002841613  | 0.00568334   | 0.008506512  | 0.002311837 | 0.002080683  | 0.006038285 | 0.004100953 | 0.013680383 | 0.006408433 | 0.006290147 |
| 0.003189649 | 0.002993311  | 0.005771934  | 0.007520711  | 0.003201123 | 0.002414679  | 0.003381627 | 0.003713826 | 0.009906022 | 0.005871501 | 0.006306517 |
| 0.004135763 | 0.002808819  | 0.005006727  | 0.006600235  | 0.001978904 | 0.003154792  | 0.006057817 | 0.003163273 | 0.006640995 | 0.004683003 | 0.004288808 |
| 0.004087837 | 0.004048378  | 0.005807935  | 0.006047678  | 0.002142549 | 0.003312921  | 0.004274691 | 0.003932118 | 0.004844027 | 0.004177045 | 0.003601948 |
| 0.003699375 | 0.004017435  | 0.004354753  | 0.005410071  | 0.00270522  | 0.002912159  | 0.003990719 | 0.004133407 | 0.005257896 | 0.004387201 | 0.003414976 |
| 0.00249657  | 0.003389019  | 0.006944687  | 0.00633216   | 0.001628988 | 0.003291511  | 0.00388875  | 0.004409673 | 0.003936379 | 0.004556707 | 0.003279357 |
| 0.002552692 | 0.003439712  | 0.005210297  | 0.006222877  | 0.002101917 | 0.002881691  | 0.003856765 | 0.00435868  | 0.005386807 | 0.005449664 | 0.003216414 |
| 0.003836456 | 0.003200531  | 0.005191714  | 0.006228601  | 0.002637319 | 0.003342539  | 0.004958639 | 0.005927435 | 0.007065719 | 0.00645147  | 0.0031119   |
| 0.00422947  | 0.004391472  | 0.005153957  | 0.009270699  | 0.003417828 | 0.003752318  | 0.004148966 | 0.004836342 | 0.007217294 | 0.006097194 | 0.003602063 |
| 0.004428365 | 0.004363076  | 0.005349661  | 0.008089095  | 0.004127479 | 0.003277573  | 0.003633437 | 0.004779463 | 0.007229065 | 0.005388694 | 0.003015213 |
| 0.003371932 | 0.003756827  | 0.004506925  | 0.007446997  | 0.002940692 | 0.002688628  | 0.004248569 | 0.005897895 | 0.009762245 | 0.004938735 | 0.003713504 |
| 0.003653664 | 0.004062839  | 0.004985751  | 0.007061495  | 0.002742157 | 0.002883127  | 0.003508901 | 0.004146553 | 0.006584647 | 0.004443802 | 0.003582978 |
| 0.002648885 | 0.003963222  | 0.004781192  | 0.006680605  | 0.002749049 | 0.002812239  | 0.003458075 | 0.004174692 | 0.00627832  | 0.006247807 | 0.00333444  |
| 0.002413906 | 0.003678852  | 0.005128447  | 0.006681192  | 0.002442738 | 0.002966458  | 0.003666778 | 0.004510804 | 0.006104971 | 0.006208638 | 0.00365212  |
| 0.003932362 | 0.003956743  | 0.004039398  | 0.002767588  | 0.002379478 | 0.002397948  | 0.002920607 | 0.005095129 | 0.007280521 | 0.00595151  | 0.003869102 |
| 0.004090679 | 0.00340562   | 0.004516715  | 0.010311574  | 0.002974593 | 0.002149678  | 0.002503986 | 0.005535895 | 0.006505666 | 0.009770469 | 0.003413118 |
| 0.005166522 | 0.004387248  | 0.007613489  | 0.01028659   | 0.001811154 | 0.003231839  | 0.003765866 | 0.00349271  | 0.005817495 | 0.007641694 | 0.003137645 |
| 0.006270206 | 0.003722823  | 0.005544651  | 0.006213171  | 0.002039432 | 0.003609998  | 0.006452839 | 0.006122057 | 0.00536343  | 0.004344828 | 0.003239498 |
| 0.003643681 | 0.003855218  | 0.010099162  | 0.001386147  | 0.002004386 | 0.00136416   | 0.00179518  | 0.006097928 | 0.00547259  | 0.008613139 | 0.007924108 |
| 0.006126095 | 0.003580515  | 0.008995546  | 0.002026897  | 0.001255055 | 0.0015329    | 0.00166729  | 0.005146648 | 0.00504727  | 0.009521791 | 0.008499318 |
| 0.005601271 | 0.004332708  | 0.004357011  | 0.007409856  | 0.004086684 | 0.003998983  | 0.002703143 | 0.004367088 | 0.007783282 | 0.004653342 | 0.004258275 |
| 0.008047772 | 0.004668478  | 0.003672069  | 0.003261678  | 0.005414849 | 0.003143851  | 0.003234551 | 0.005063049 | 0.006958894 | 0.004684283 | 0.004065787 |
| 0.005982911 | 0.004334206  | 0.006860523  | 0.004879764  | 0.001595256 | 0.002091905  | 0.002185296 | 0.004339848 | 0.005075822 | 0.008020672 | 0.004657478 |
| 0.005505486 | 0.00344837   | 0.004510407  | 0.003653335  | 0.002297167 | 0.002725309  | 0.002983453 | 0.003870917 | 0.003530339 | 0.005299199 | 0.004603018 |
| 0.004720432 | 0.003706802  | 0.004032046  | 0.005142951  | 0.003129296 | 0.002246897  | 0.00267957  | 0.005541967 | 0.008262142 | 0.005363103 | 0.004802902 |
| 0.005003475 | 0.004574535  | 0.004333309  | 0.0057208    | 0.003097587 | 0.002921079  | 0.003207144 | 0.004338205 | 0.006935146 | 0.004925704 | 0.003238359 |
| 0.006301734 | 0.00442029   | 0.004277291  | 0.006371306  | 0.003321247 | 0.002995397  | 0.003165399 | 0.00468674  | 0.005831653 | 0.004548905 | 0.003462915 |
| 0.005593998 | 0.003624257  | 0.005445108  | 0.010376086  | 0.002512889 | 0.003055948  | 0.004200366 | 0.004297474 | 0.005662532 | 0.005200736 | 0.003502847 |
| 0.004956683 | 0.00360705   | 0.00571856   | 0.009032478  | 0.003767724 | 0.003508842  | 0.002827231 | 0.005255554 | 0.006498422 | 0.006044197 | 0.003398211 |
| 0.003746693 | 0.003008067  | 0.0033511826 | 0.006158693  | 0.005142276 | 0.002502824  | 0.003196575 | 0.005863546 | 0.011190763 | 0.00547402  | 0.004388116 |
| 0.005225648 | 0.003252562  | 0.004945319  | 0.004392345  | 0.006554426 | 0.001784677  | 0.003256832 | 0.006796592 | 0.013644338 | 0.006126051 | 0.006100566 |
| 0.004054218 | 0.003876586  | 0.006376744  | 0.001544863  | 0.005447616 | 0.002376049  | 0.003275037 | 0.006753404 | 0.007792211 | 0.007279016 | 0.007226356 |
| 0.006613406 | 0.003903473  | 0.006666529  | 0.002519513  | 0.007852205 | 0.002290358  | 0.003543514 | 0.007439336 | 0.01504964  | 0.006929618 | 0.00782467  |
| 0.0039      |              |              |              |             |              |             |             |             |             |             |

|             |              |             |             |             |             |             |             |             |             |             |
|-------------|--------------|-------------|-------------|-------------|-------------|-------------|-------------|-------------|-------------|-------------|
| 0.002617751 | 0.006173864  | 0.002216018 | 0.004144504 | 0.002976572 | 0.00778841  | 0.005177703 | 0.003122625 | 0.001700052 | 0.006991421 | 0.00722103  |
| 0.001373248 | 0.007450619  | 0.002495453 | 0.003856639 | 0.003888202 | 0.008145656 | 0.005794788 | 0.006046991 | 0.002382656 | 0.008673169 | 0.006448616 |
| 0.003488323 | 0.014450293  | 0.002225391 | 0.004053895 | 0.004077448 | 0.006744516 | 0.00557913  | 0.002054028 | 0.00042037  | 0.004407606 | 0.00410571  |
| 0.001682481 | 0.007336305  | 0.004786579 | 0.005322842 | 0.004347021 | 0.011336427 | 0.006355691 | 0.004438407 | 0.001710884 | 0.004612628 | 0.006184256 |
| 0.00279102  | 0.011978848  | 0.001526887 | 0.000926516 | 0.006010994 | 0.003221015 | 0.003761207 | 0.004725362 | 0.000825717 | 0.002246482 | 0.004826409 |
| 0.003090686 | 0.011169259  | 0.001215566 | 0.001181605 | 0.008373557 | 0.003666228 | 0.004413151 | 0.006179601 | 0.000772432 | 0.00282496  | 0.006033932 |
| 0.003207601 | 0.00738066   | 0.003656367 | 0.004523922 | 0.006800787 | 0.008847288 | 0.007282234 | 0.003274446 | 0.001706603 | 0.001924074 | 0.006623008 |
| 0.00337859  | 0.005734707  | 0.005335793 | 0.004569365 | 0.009785955 | 0.01200976  | 0.011569675 | 0.003896853 | 0.00067759  | 0.001425292 | 0.007837057 |
| 0.003432285 | 0.005848755  | 0.002343976 | 0.002755009 | 0.003197128 | 0.00497018  | 0.003028929 | 0.002427056 | 0.001337637 | 0.004250089 | 0.004259144 |
| 0.001459688 | 0.006196902  | 0.003225945 | 0.00191262  | 0.003721255 | 0.00423932  | 0.003731167 | 0.003026146 | 0.002107786 | 0.002804472 | 0.006408194 |
| 0.001822627 | 0.006068446  | 0.002776489 | 0.002135038 | 0.003355828 | 0.004554982 | 0.00386854  | 0.002951526 | 0.001721552 | 0.00363038  | 0.004818385 |
| 0.001854121 | 0.003554777  | 0.001210426 | 0.000980657 | 0.00290919  | 0.004794677 | 0.007612449 | 0.004941328 | 0.003370967 | 0.007249064 | 0.002824944 |
| 0.001790772 | 0.003498825  | 0.002459581 | 0.000836882 | 0.005902879 | 0.004704395 | 0.005548156 | 0.009413415 | 0.005984891 | 0.007361031 | 0.004031137 |
| 0.001685107 | 0.003005221  | 0.001560195 | 0.0006672   | 0.004248496 | 0.00404946  | 0.005460858 | 0.009826042 | 0.005828442 | 0.006454536 | 0.004327229 |
| 0.00220479  | 0.0036303    | 0.002973605 | 0.001736758 | 0.007901862 | 0.004258875 | 0.00507291  | 0.00737678  | 0.005826945 | 0.008015435 | 0.003629035 |
| 0.002232515 | 0.003364552  | 0.002426003 | 0.001968712 | 0.006454617 | 0.003772301 | 0.005230503 | 0.007740434 | 0.004366965 | 0.007921092 | 0.003078501 |
| 0.001893982 | 0.002867218  | 0.000962978 | 0.002065222 | 0.002885161 | 0.003697631 | 0.004794057 | 0.007308801 | 0.004791235 | 0.007685476 | 0.004538474 |
| 0.001880392 | 0.002415482  | 0.0040671   | 0.000799279 | 0.003207832 | 0.002337544 | 0.004387651 | 0.005441608 | 0.005934833 | 0.008514605 | 0.003555203 |
| 0.002136984 | 0.003374749  | 0.002397621 | 0.001126881 | 0.006680171 | 0.003803436 | 0.004742233 | 0.006400362 | 0.004266116 | 0.008389865 | 0.00328901  |
| 0.001606584 | 0.002880675  | 0.001852162 | 0.00136074  | 0.004771424 | 0.003537969 | 0.004668439 | 0.007171262 | 0.004202993 | 0.007984662 | 0.003448641 |
| 0.001809108 | 0.002954724  | 0.001770368 | 0.001050843 | 0.004500416 | 0.003296414 | 0.004618052 | 0.008112268 | 0.00471739  | 0.007557708 | 0.003791199 |
| 0.001816056 | 0.003119332  | 0.001996108 | 0.001595713 | 0.004899459 | 0.003141844 | 0.004680544 | 0.007576836 | 0.004774791 | 0.008440035 | 0.00329829  |
| 0.001797075 | 0.003112055  | 0.001310713 | 0.000995497 | 0.003182213 | 0.003644444 | 0.005345813 | 0.008828363 | 0.003822813 | 0.006921035 | 0.003499684 |
| 0.002444273 | 0.002653389  | 0.001206767 | 0.001545006 | 0.004091236 | 0.002924664 | 0.004650144 | 0.008990801 | 0.003343623 | 0.00927214  | 0.003053566 |
| 0.002404197 | 0.003132096  | 0.001775748 | 0.001716556 | 0.003645894 | 0.002890019 | 0.004569055 | 0.008653896 | 0.003913691 | 0.009287379 | 0.002757557 |
| 0.002174731 | 0.00345901   | 0.001653561 | 0.001336416 | 0.0034171   | 0.00297928  | 0.004571379 | 0.008047477 | 0.003977439 | 0.008990623 | 0.003226059 |
| 0.002998167 | 0.004034245  | 0.005630461 | 0.00385444  | 0.008011738 | 0.003816926 | 0.00427913  | 0.01564144  | 0.011792842 | 0.038100255 | 0.010968446 |
| 0.004256609 | 0.008816611  | 0.001540348 | 0.003491977 | 0.016888023 | 0.006672775 | 0.006720739 | 0.006255514 | 0.010649436 | 0.004917263 | 0.00734886  |
| 0.004978054 | 0.007030301  | 0.005836151 | 0.005191727 | 0.024274755 | 0.01397421  | 0.014223689 | 0.009010475 | 0.004618659 | 0.004136946 | 0.009224178 |
| 0.01283501  | 0.007426536  | 0.002914816 | 0.002730637 | 0.00525157  | 0.011278981 | 0.011183402 | 0.003821861 | 0.001304297 | 0.001596024 | 0.00870274  |
| 0.001914254 | 0.008127193  | 0.01254987  | 0.002559913 | 0.004756806 | 0.007842488 | 0.007806711 | 0.007120755 | 0.004049855 | 0.005720355 | 0.005851479 |
| 0.006283749 | 0.007827079  | 0.004488456 | 0.003328077 | 0.002001689 | 0.010562897 | 0.008412717 | 0.006044049 | 0.002604814 | 0.004930042 | 0.006659129 |
| 0.008854005 | 0.010274338  | 0.014790273 | 0.005218603 | 0.0036466   | 0.007156692 | 0.005174112 | 0.008359808 | 0.003986406 | 0.005613941 | 0.005991331 |
| 0.009708998 | 0.008525827  | 0.014462684 | 0.003457955 | 0.005150224 | 0.013358709 | 0.009280616 | 0.006657186 | 0.002889859 | 0.00382572  | 0.00434837  |
| 0.011619453 | 0.008835331  | 0.011485974 | 0.003143597 | 0.00698355  | 0.009408489 | 0.006251484 | 0.001934938 | 0.002316768 | 0.003234613 | 0.004968516 |
| 0.018646445 | 0.010175849  | 0.011410782 | 0.00357514  | 0.005145051 | 0.012257053 | 0.010393983 | 0.00205562  | 0.001906784 | 0.002763955 | 0.005154466 |
| 0.012179044 | 0.008732446  | 0.00784487  | 0.002862969 | 0.003969775 | 0.009751048 | 0.007532876 | 0.002254586 | 0.002708973 | 0.003131484 | 0.005219777 |
| 0.008943156 | 0.010812655  | 0.013693087 | 0.00511792  | 0.005103121 | 0.017740615 | 0.010472788 | 0.002598449 | 0.001773545 | 0.002445101 | 0.00396646  |
| 0.009907932 | 0.008271517  | 0.011991452 | 0.005965029 | 0.00641023  | 0.01531848  | 0.005787387 | 0.002880278 | 0.003308419 | 0.003509063 | 0.004084496 |
| 0.01290121  | 0.007111617  | 0.016553118 | 0.008685608 | 0.006329662 | 0.011352331 | 0.008172649 | 0.004290358 | 0.003811157 | 0.004884894 | 0.003314435 |
| 0.015325153 | 0.007506857  | 0.005123892 | 0.005236718 | 0.005717702 | 0.01286102  | 0.011277914 | 0.004608472 | 0.002758836 | 0.00297797  | 0.009050757 |
| 0.014826693 | 0.009929387  | 0.006238292 | 0.004815335 | 0.00525363  | 0.012897135 | 0.010967355 | 0.004147288 | 0.003006611 | 0.002969091 | 0.006064115 |
| 0.014393457 | 0.013043236  | 0.007432093 | 0.006333626 | 0.004613389 | 0.014123981 | 0.013253429 | 0.002495333 | 0.002777675 | 0.002954888 | 0.004432191 |
| 0.03460329  | 0.00523435   | 0.007770751 | 0.009872448 | 0.00527161  | 0.022566371 | 0.016815386 | 0.004041438 | 0.00171271  | 0.002937382 | 0.005989488 |
| 0.033924816 | 0.005566258  | 0.007651859 | 0.010816242 | 0.005791468 | 0.020021563 | 0.01436696  | 0.004275972 | 0.001661759 | 0.002794664 | 0.005682725 |
| 0.007206897 | 0.00892197   | 0.016351413 | 0.007458141 | 0.016133097 | 0.011291356 | 0.007187548 | 0.004432777 | 0.009590855 | 0.005352214 | 0.012558825 |
| 0.008281524 | 0.007383502  | 0.021337094 | 0.006209991 | 0.011521566 | 0.008135969 | 0.007801799 | 0.005357961 | 0.012051228 | 0.004936559 | 0.008967029 |
| 0.015557911 | 0.008506611  | 0.011334623 | 0.006162546 | 0.008808635 | 0.011454959 | 0.010776131 | 0.007489904 | 0.00856157  | 0.003064758 | 0.011796746 |
| 0.012246101 | 0.0034717353 | 0.001854389 | 0.013399446 | 0.003909467 | 0.008591446 | 0.013170752 | 0.007594376 | 0.006575865 | 0.003171292 | 0.007689315 |
| 0.008018441 | 0.034127969  | 0.002439358 | 0.019600865 | 0.004290988 | 0.007309857 | 0.013944187 | 0.010806201 | 0.006929212 | 0.002983152 | 0.015880731 |
| 0.017081284 | 0.006793045  | 0.019470016 | 0.006350566 | 0.00510242  | 0.008202467 | 0.002652016 | 0.00521177  | 0.006642508 | 0.009481016 | 0.002754847 |
| 0.005949704 | 0.004113828  | 0.005523742 | 0.007525471 | 0.005896463 | 0.00368538  | 0.004682651 | 0.015181844 | 0.006922209 | 0.006405931 | 0.005464355 |
| 0.002963963 | 0.006158291  | 0.006702722 | 0.003731763 | 0.033233535 | 0.004225535 | 0.012889001 | 0.008206608 | 0.00833716  | 0.006938609 | 0.008054948 |
| 0.006325134 | 0.004942669  | 0.008144794 | 0.004124473 | 0.015847622 | 0.013278043 | 0.006986266 | 0.009224829 | 0.007965653 | 0.006444029 | 0.012545828 |
| 0.005407048 | 0.003964748  | 0.005694925 | 0.005491738 | 0.019490557 | 0.01468771  | 0.004887632 | 0.011031122 | 0.007518399 | 0.007017023 | 0.010891959 |
| 0.004035788 | 0.027487827  | 0.002847654 | 0.020208422 | 0.007196382 | 0.043923545 | 0.00499151  | 0.006146767 | 0.030931693 | 0.005052945 | 0.032499991 |
| 0.007721631 | 0.004588657  | 0.00511685  | 0.006041958 | 0.00707601  | 0.007124876 | 0.005284585 | 0.00597475  | 0.000271878 | 0.00155191  | 0.005913254 |
| 0.008450257 | 0.002878822  | 0.011757688 | 0.002096307 | 0.007285783 | 0.008581041 | 0.009061625 | 0.01579699  | 0.006412553 | 0.00874156  | 0.003328075 |
| 0.007407814 | 0.003638464  | 0.009115438 | 0.005678191 | 0.008368939 | 0.00708815  | 0.024442252 | 0.005884218 | 0.003008594 | 0.005851476 | 0.003320804 |
| 0.011134612 | 0.006642342  | 0.017654173 | 0.017654173 | 0.01663196  | 0.011114138 | 0.015563978 | 0.006036091 | 0.003934213 | 0.008468951 | 0.005006673 |
| 0.005325313 | 0.00398171   | 0.007069782 | 0.001560138 | 0.017679992 | 0.008645852 | 0.009218886 | 0.012380036 | 0.011863527 | 0.00462438  | 0.00798263  |
| 0.005930766 | 0.003211463  | 0.005150707 | 0.004575086 | 0.008986383 | 0.006307623 | 0.008734824 | 0.007086884 | 0.006375484 | 0.004399803 | 0.004675142 |
| 0.007245785 | 0.006728287  | 0.007534295 | 0.0041572   | 0.009570248 | 0.01131256  | 0.028859543 | 0.005347591 | 0.006415592 | 0.005055922 | 0.031242438 |
| 0.008144862 | 0.004562005  | 0.006939771 | 0.006538614 | 0.015774093 | 0.017217823 | 0.008467537 | 0.009120958 | 0.009804158 | 0.007188    | 0.007722475 |
| 0.007291796 | 0.004796802  | 0.008926434 | 0.010707812 | 0.0216889   | 0.030578306 | 0.015943843 | 0.00747511  | 0.007985217 | 0.004843207 | 0.007490806 |
| 0.004879194 | 0.003226288  | 0.01173066  | 0.002889051 | 0.006137359 | 0.005389539 | 0.002559185 | 0.00923     | 0.002595828 | 0.003864944 | 0.042522307 |
| 0.011793502 | 0.008235003  | 0.004877756 | 0.005185259 | 0.017094481 | 0.007843164 | 0.007844421 | 0.011744542 | 0.007776713 | 0.003911668 | 0.014207179 |
| 0.00981375  | 0.006574238  | 0.007329414 | 0.005260704 | 0.00905295  | 0.008873669 | 0.021313946 | 0.008037467 | 0.004569874 | 0.004562466 | 0.046113631 |
| 0.005859681 | 0.006340324  | 0.004089935 | 0.005036638 | 0.031779002 | 0.005895258 | 0.009847426 | 0.004788824 | 0.0043      |             |             |

|             |             |             |             |             |             |             |             |             |             |             |
|-------------|-------------|-------------|-------------|-------------|-------------|-------------|-------------|-------------|-------------|-------------|
| 0.007134493 | 0.005830119 | 0.006602152 | 0.004715887 | 0.006673833 | 0.012690983 | 0.009588113 | 0.008182626 | 0.003832838 | 0.006412867 | 0.004166768 |
| 0.00418888  | 0.004516737 | 0.00501939  | 0.003200789 | 0.00488215  | 0.004522297 | 0.004004467 | 0.009243747 | 0.005959968 | 0.006751454 | 0.005781448 |
| 0.004717928 | 0.003322467 | 0.001766725 | 0.001264896 | 0.006142034 | 0.003911163 | 0.00574882  | 0.008996057 | 0.00762828  | 0.003296706 | 0.005088985 |
| 0.005305549 | 0.004695847 | 0.002934062 | 0.000975747 | 0.006372276 | 0.004578911 | 0.004116637 | 0.006067646 | 0.006176152 | 0.00321182  | 0.005922798 |
| 0.013083633 | 0.024382946 | 0.005612442 | 0.005039222 | 0.007076654 | 0.011505604 | 0.007271405 | 0.005885952 | 0.002475626 | 0.001584227 | 0.00632619  |
| 0.011905349 | 0.01707856  | 0.003935977 | 0.008457369 | 0.004363889 | 0.008331446 | 0.004339844 | 0.007056048 | 0.003654171 | 0.005880922 | 0.003505494 |
| 0.024085433 | 0.025282932 | 0.004120343 | 0.010285801 | 0.006638765 | 0.006260168 | 0.003261469 | 0.007486153 | 0.003641738 | 0.003827691 | 0.003283252 |
| 0.024525899 | 0.023275454 | 0.004201966 | 0.010603846 | 0.007430762 | 0.006476948 | 0.003027984 | 0.008880301 | 0.003596106 | 0.004586474 | 0.00250538  |
| 0.005725709 | 0.004919071 | 0.002969941 | 0.016114743 | 0.000892222 | 0.003501691 | 0.002896636 | 0.005371287 | 0.001419001 | 0.0031507   | 0.012139812 |
| 0.00569845  | 0.008905014 | 0.005844138 | 0.001680088 | 0.002248943 | 0.00254337  | 0.000794676 | 0.002950678 | 0.001976299 | 0.004996826 | 0.003169885 |
| 0.006044255 | 0.013479179 | 0.007694168 | 0.00238426  | 0.002102634 | 0.002298261 | 0.001495082 | 0.004052276 | 0.0026165   | 0.005062412 | 0.003453938 |
| 0.012424537 | 0.004266211 | 0.00334383  | 0.002068959 | 0.005210059 | 0.00769391  | 0.002923033 | 0.005757001 | 0.005545039 | 0.002781684 | 0.002999983 |
| 0.001938889 | 0.00165179  | 0.001407917 | 0.001162235 | 0.009928758 | 0.00781641  | 0.01102714  | 0.006232338 | 0.005397546 | 0.007848127 | 0.002758501 |
| 0.004064883 | 0.002884469 | 0.002703176 | 0.003843691 | 0.003540778 | 0.003030537 | 0.003834771 | 0.003877005 | 0.0026313   | 0.002766787 | 0.001706547 |
| 0.006870643 | 0.002861898 | 0.003329334 | 0.005993056 | 0.015238711 | 0.00424141  | 0.00651404  | 0.008085534 | 0.00489869  | 0.003842329 | 0.004535222 |
| 0.001159197 | 0.005570702 | 0.004719405 | 0.00238512  | 0.005540287 | 0.004223646 | 0.001337686 | 0.006054917 | 0.010953806 | 0.005470098 | 0.004028181 |
| 0.00114098  | 0.002953591 | 0.003071921 | 0.00143119  | 0.003952582 | 0.003519906 | 0.002427789 | 0.005203493 | 0.00393059  | 0.008821828 | 0.004945264 |
| 0.001049896 | 0.00302405  | 0.005191572 | 0.002573993 | 0.003711298 | 0.003050738 | 0.002222021 | 0.005026545 | 0.003260504 | 0.009452585 | 0.004542058 |
| 0.001199847 | 0.002969354 | 0.006252294 | 0.002580891 | 0.004111749 | 0.003103247 | 0.002032871 | 0.00542132  | 0.003189805 | 0.008969744 | 0.004663094 |

| CP_54       | CP_55       | CP_56       | CP_57       | CP_58       | CP_59       | CP_60        | CP_61       | CP_62       | CP_63       | CP_64        |
|-------------|-------------|-------------|-------------|-------------|-------------|--------------|-------------|-------------|-------------|--------------|
| 0.003656666 | 0.005067743 | 0.006961353 | 0.007345639 | 0.009998073 | 0.001806134 | 0.00728588   | 0.0047407   | 0.005182179 | 0.003696555 | 0.003064831  |
| 0.004451837 | 0.004403005 | 0.008598987 | 0.010263503 | 0.008539831 | 0.00166316  | 0.004059807  | 0.004040237 | 0.004099611 | 0.002421265 | 0.003306717  |
| 0.006904076 | 0.005973447 | 0.01055482  | 0.011638902 | 0.012646643 | 0.001907446 | 0.004697469  | 0.004637764 | 0.004261561 | 0.002962171 | 0.003660541  |
| 0.005027735 | 0.006062359 | 0.010394512 | 0.010210637 | 0.011258132 | 0.001694426 | 0.003449423  | 0.00353329  | 0.003879778 | 0.002812198 | 0.00346834   |
| 0.004950857 | 0.006642026 | 0.008645231 | 0.009292956 | 0.006484379 | 0.003303855 | 0.00420707   | 0.004569524 | 0.004940512 | 0.00337983  | 0.004233757  |
| 0.006489932 | 0.006224565 | 0.0107196   | 0.011719255 | 0.008381144 | 0.002266826 | 0.003734648  | 0.0050547   | 0.004615824 | 0.003427552 | 0.004695313  |
| 0.003857803 | 0.028800436 | 0.005708629 | 0.008048681 | 0.004204576 | 0.008580085 | 0.005343555  | 0.006935693 | 0.017853971 | 0.004701849 | 0.005361742  |
| 0.00566405  | 0.012708069 | 0.008276429 | 0.008646872 | 0.005045065 | 0.004053916 | 0.003907624  | 0.005473013 | 0.008420701 | 0.004558459 | 0.005254653  |
| 0.003733757 | 0.009138704 | 0.005203577 | 0.006856821 | 0.006770394 | 0.001003123 | 0.005646909  | 0.008278639 | 0.006040613 | 0.003565093 | 0.004485574  |
| 0.004361964 | 0.033927382 | 0.006437059 | 0.010047795 | 0.005261832 | 0.005770899 | 0.0044188    | 0.006163108 | 0.01564434  | 0.003997135 | 0.004706199  |
| 0.003966251 | 0.026572379 | 0.006711285 | 0.009196763 | 0.007554847 | 0.00310544  | 0.005342243  | 0.008030865 | 0.012276337 | 0.004104984 | 0.004419768  |
| 0.008225303 | 0.004244501 | 0.005345729 | 0.003463666 | 0.004612203 | 0.002072703 | 0.005123462  | 0.008119776 | 0.006133375 | 0.00217681  | 0.004107405  |
| 0.008544912 | 0.004368299 | 0.005304115 | 0.00365514  | 0.00440523  | 0.0020899   | 0.005673638  | 0.007288496 | 0.006267367 | 0.002250277 | 0.004194414  |
| 0.003653326 | 0.004324188 | 0.004958279 | 0.008130988 | 0.004426072 | 0.002412648 | 0.004504493  | 0.004132911 | 0.005367296 | 0.007002579 | 0.006128698  |
| 0.006510041 | 0.009335576 | 0.004598506 | 0.004758319 | 0.002102428 | 0.006185188 | 0.008082194  | 0.00472831  | 0.010333874 | 0.004730315 | 0.00398793   |
| 0.003993402 | 0.02920802  | 0.004997159 | 0.007205919 | 0.003724056 | 0.00956445  | 0.005237363  | 0.007353089 | 0.020727455 | 0.005729959 | 0.005918477  |
| 0.003843616 | 0.018047391 | 0.005832968 | 0.006563136 | 0.003064386 | 0.005224918 | 0.004042049  | 0.006609202 | 0.01458527  | 0.006189871 | 0.006637996  |
| 0.005063705 | 0.016484592 | 0.005003019 | 0.005555276 | 0.002792656 | 0.007412788 | 0.003725024  | 0.006201221 | 0.014132689 | 0.006395152 | 0.007340621  |
| 0.004515514 | 0.017254351 | 0.004441542 | 0.005538243 | 0.002594133 | 0.009919798 | 0.005613185  | 0.007565952 | 0.015767818 | 0.006154981 | 0.006043227  |
| 0.004201126 | 0.017730525 | 0.004714018 | 0.006443758 | 0.003097872 | 0.013452486 | 0.005487984  | 0.008472289 | 0.020842258 | 0.006374679 | 0.006917911  |
| 0.00397093  | 0.022408133 | 0.00515203  | 0.006839329 | 0.003226244 | 0.011499672 | 0.005126119  | 0.007583969 | 0.020134884 | 0.005896317 | 0.006227438  |
| 0.007424553 | 0.009823196 | 0.005261137 | 0.006079955 | 0.002399491 | 0.005849966 | 0.003772307  | 0.006038386 | 0.015592536 | 0.007033858 | 0.002960421  |
| 0.009489964 | 0.009493277 | 0.005975016 | 0.009246707 | 0.002677122 | 0.007590077 | 0.006396134  | 0.007032364 | 0.012694804 | 0.003765295 | 0.004973705  |
| 0.004374488 | 0.005714734 | 0.004394325 | 0.002382499 | 0.002065977 | 0.005664742 | 0.00583871   | 0.00363805  | 0.006346175 | 0.002196707 | 0.001904682  |
| 0.003766216 | 0.004484274 | 0.002949218 | 0.002618937 | 0.002415513 | 0.004439703 | 0.004093974  | 0.003250819 | 0.005826319 | 0.002714087 | 0.0027414    |
| 0.003570556 | 0.004855756 | 0.005977669 | 0.003955035 | 0.003472578 | 0.004087345 | 0.004183799  | 0.004481958 | 0.008170471 | 0.002983104 | 0.002951361  |
| 0.004460246 | 0.009777557 | 0.005185709 | 0.003633857 | 0.003523393 | 0.0048967   | 0.003787371  | 0.004906218 | 0.008052691 | 0.00289463  | 0.002791454  |
| 0.003260998 | 0.008138174 | 0.003515511 | 0.003454608 | 0.002079986 | 0.007108724 | 0.005745188  | 0.004321013 | 0.008193893 | 0.002978646 | 0.00340995   |
| 0.006541175 | 0.00847212  | 0.003429098 | 0.00372283  | 0.003347387 | 0.005886739 | 0.009053918  | 0.005261941 | 0.007901802 | 0.002289032 | 0.004095534  |
| 0.006386745 | 0.006014324 | 0.00299437  | 0.004774356 | 0.003042124 | 0.028093831 | 0.010713244  | 0.007028482 | 0.007513173 | 0.003050531 | 0.007521168  |
| 0.002140531 | 0.002226849 | 0.002960906 | 0.001794843 | 0.002197532 | 0.008898881 | 0.007342345  | 0.005239941 | 0.003736343 | 0.00526614  | 0.008226727  |
| 0.002302684 | 0.002258585 | 0.002897046 | 0.001727235 | 0.002243093 | 0.009062605 | 0.006551869  | 0.005114427 | 0.003763121 | 0.005045722 | 0.008431879  |
| 0.003808209 | 0.006636465 | 0.005804681 | 0.004634868 | 0.003879157 | 0.00353335  | 0.004638737  | 0.00591548  | 0.006827606 | 0.003639893 | 0.003342309  |
| 0.004242517 | 0.014725655 | 0.006087376 | 0.007857935 | 0.00522062  | 0.002751504 | 0.004442415  | 0.006475845 | 0.007868663 | 0.003486634 | 0.004226086  |
| 0.002848507 | 0.007923775 | 0.006755844 | 0.005654386 | 0.004480253 | 0.002618775 | 0.004517593  | 0.006360192 | 0.006510343 | 0.003413627 | 0.004128264  |
| 0.004892078 | 0.012155526 | 0.005043105 | 0.004591127 | 0.002556499 | 0.006853984 | 0.004603546  | 0.005938563 | 0.010799776 | 0.003709074 | 0.0042223573 |
| 0.004699592 | 0.012118185 | 0.005592706 | 0.005265217 | 0.003040955 | 0.004785839 | 0.003666842  | 0.005395254 | 0.009705233 | 0.003421226 | 0.003973599  |
| 0.004717434 | 0.006816738 | 0.006301545 | 0.006139694 | 0.004489025 | 0.003721389 | 0.005786825  | 0.004501781 | 0.005578324 | 0.003290071 | 0.003394147  |
| 0.003224855 | 0.00601509  | 0.004375634 | 0.004222272 | 0.003468974 | 0.004452872 | 0.005406072  | 0.005842631 | 0.006318948 | 0.003550062 | 0.003843056  |
| 0.003259286 | 0.006901384 | 0.003712092 | 0.003616743 | 0.002994049 | 0.00482501  | 0.004925982  | 0.005427638 | 0.005679164 | 0.003532933 | 0.003494203  |
| 0.003531103 | 0.010845715 | 0.005360863 | 0.005900916 | 0.004029732 | 0.004736512 | 0.005110415  | 0.006157707 | 0.007527679 | 0.00376734  | 0.004189248  |
| 0.00340618  | 0.013652522 | 0.0042278   | 0.005141595 | 0.003398373 | 0.006479527 | 0.005311613  | 0.00624209  | 0.009221588 | 0.004071372 | 0.004302534  |
| 0.003017362 | 0.004841564 | 0.004785453 | 0.004883844 | 0.003029703 | 0.004537786 | 0.004131497  | 0.005637672 | 0.005002999 | 0.003449597 | 0.004622625  |
| 0.002453117 | 0.008145763 | 0.004034536 | 0.003599869 | 0.002934545 | 0.00789959  | 0.005964609  | 0.005688336 | 0.009414965 | 0.003787367 | 0.003137139  |
| 0.003134186 | 0.00699765  | 0.00462579  | 0.004275856 | 0.002972801 | 0.012293277 | 0.005565823  | 0.006635984 | 0.012213881 | 0.003082702 | 0.002990491  |
| 0.00478871  | 0.019540344 | 0.003377827 | 0.005692719 | 0.003290375 | 0.023575492 | 0.005840711  | 0.008041266 | 0.01265313  | 0.003407355 | 0.003975783  |
| 0.003798967 | 0.009971936 | 0.004034753 | 0.003982981 | 0.002922612 | 0.008185746 | 0.005592715  | 0.006749005 | 0.009176907 | 0.003458442 | 0.003677293  |
| 0.003704151 | 0.01138971  | 0.004210686 | 0.004858327 | 0.002797799 | 0.010532658 | 0.005410695  | 0.007330958 | 0.012058497 | 0.004352662 | 0.004665862  |
| 0.003784311 | 0.01480589  | 0.004411182 | 0.00562144  | 0.003138645 | 0.009206099 | 0.005444632  | 0.007387462 | 0.01245842  | 0.004256148 | 0.004523797  |
| 0.005439998 | 0.009299378 | 0.003829709 | 0.004826373 | 0.00290864  | 0.01067797  | 0.006315832  | 0.007991256 | 0.01154828  | 0.004158503 | 0.004442497  |
| 0.004412941 | 0.012934797 | 0.003572785 | 0.004103606 | 0.002460045 | 0.008721485 | 0.005972172  | 0.006670468 | 0.015603463 | 0.00405018  | 0.004609943  |
| 0.002991966 | 0.007617028 | 0.003810415 | 0.004408323 | 0.003269704 | 0.00461682  | 0.004335727  | 0.00403848  | 0.007784709 | 0.003871796 | 0.003384311  |
| 0.001848892 | 0.004449878 | 0.004171085 | 0.003798293 | 0.003294607 | 0.003851785 | 0.0040494925 | 0.005072435 | 0.005239164 | 0.005785712 | 0.004049491  |
| 0.003740127 | 0.003134205 | 0.00533186  | 0.009119413 | 0.004623317 | 0.004886087 | 0.004278311  | 0.003183838 | 0.004713569 | 0.007747061 | 0.00292628   |
| 0.00187075  | 0.003675948 | 0.00459274  | 0.004405576 | 0.005055941 | 0.007313065 | 0.005838876  | 0.004485843 | 0.003541738 | 0.008869368 | 0.002315832  |
| 0.005053002 | 0.008063085 | 0.003147943 | 0.003447099 | 0.003666616 | 0.008558627 | 0.005134616  | 0.006559723 | 0.004433795 | 0.003063931 | 0.00270455   |
| 0.005187954 | 0.003372248 | 0.003492914 | 0.003885323 | 0.003400323 | 0.00840699  | 0.005040647  | 0.005547624 | 0.004126869 | 0.003211129 | 0.002747339  |
| 0.002229642 | 0.0033748   | 0.003080927 | 0.00358217  | 0.003263033 | 0.005582282 | 0.004792006  | 0.003989767 | 0.004858357 | 0.005253234 | 0.002859243  |
| 0.003347569 | 0.00306503  | 0.004157641 | 0.004530312 | 0.003400437 | 0.004394392 | 0.004693164  | 0.004175367 | 0.004481722 | 0.004105344 | 0.002931998  |
| 0.004147711 | 0.008126268 | 0.003533541 | 0.003823757 | 0.002790176 | 0.011335885 | 0.007002654  | 0.007472844 | 0.011148298 | 0.004315913 | 0.003647166  |
| 0.003804829 | 0.006735949 | 0.003587702 | 0.003541319 | 0.002682748 | 0.008271003 | 0.005889156  | 0.006446454 | 0.007582211 | 0.003756752 | 0.003685037  |
| 0.003637089 | 0.00519343  | 0.003308132 | 0.003163874 | 0.00292507  | 0.0068403   | 0.005247567  | 0.005761363 | 0.005855547 | 0.003472965 | 0.003196837  |
| 0.003316026 | 0.002824077 | 0.003525056 | 0.003019659 | 0.00312441  | 0.006003614 | 0.004486886  | 0.004261358 | 0.008066613 | 0.00339361  | 0.003024228  |
| 0.002488411 | 0.006554218 | 0.004358685 | 0.003281809 | 0.003209117 | 0.006501814 | 0.005929315  | 0.003703877 | 0.006402479 | 0.003961502 | 0.003229792  |
| 0.005983592 | 0.012433346 | 0.004232402 | 0.005340898 | 0.002896196 | 0.020043624 | 0.004875495  | 0.006864648 | 0.009636447 | 0.003340735 | 0.004104027  |
| 0.008332994 | 0.012176051 | 0.004797941 | 0.005263093 | 0.002834266 | 0.025517975 | 0.006224964  | 0.006554816 | 0.007288926 | 0.003216471 | 0.003259588  |
| 0.006165972 | 0.003581774 | 0.005734498 | 0.009223291 | 0.005167561 | 0.008452281 | 0.0057217    | 0.005212077 | 0.002884613 | 0.003594633 | 0.004213147  |
| 0.009132072 | 0.010987082 | 0.005527665 | 0.006033497 | 0.003097907 | 0.023074544 | 0.00438607   | 0.006031091 | 0.003813494 | 0.003234471 | 0.002431543  |
| 0.007696931 |             |             |             |             |             |              |             |             |             |              |

|             |             |             |             |             |             |             |             |             |             |              |
|-------------|-------------|-------------|-------------|-------------|-------------|-------------|-------------|-------------|-------------|--------------|
| 0.008568622 | 0.004884269 | 0.007385575 | 0.006277667 | 0.014769919 | 0.0029804   | 0.002056546 | 0.003518239 | 0.002612217 | 0.009964349 | 0.007383756  |
| 0.008786197 | 0.004182396 | 0.007977828 | 0.004670866 | 0.009685622 | 0.00340651  | 0.001180198 | 0.004784218 | 0.004332356 | 0.008198689 | 0.006384672  |
| 0.005232216 | 0.002178607 | 0.00645929  | 0.002914104 | 0.021855915 | 0.002868716 | 0.002108934 | 0.006489662 | 0.002049451 | 0.007060103 | 0.007591016  |
| 0.010062154 | 0.00231737  | 0.005332076 | 0.003506587 | 0.01349122  | 0.004766568 | 0.001165261 | 0.004591606 | 0.003893535 | 0.008007134 | 0.006482836  |
| 0.010033187 | 0.001310738 | 0.008068532 | 0.006395779 | 0.012599399 | 0.003977026 | 0.008280762 | 0.005625922 | 0.002613678 | 0.003460979 | 0.018199641  |
| 0.010567914 | 0.00142806  | 0.008986247 | 0.008079323 | 0.014095378 | 0.004518998 | 0.006610194 | 0.006054178 | 0.003156656 | 0.002986623 | 0.015856265  |
| 0.007087881 | 0.006196876 | 0.00589859  | 0.008635157 | 0.012886634 | 0.004371402 | 0.005833317 | 0.007083971 | 0.002944842 | 0.008400474 | 0.006195077  |
| 0.004472744 | 0.004548291 | 0.005895692 | 0.007043727 | 0.01087326  | 0.006298378 | 0.005040379 | 0.01082924  | 0.003419031 | 0.009522256 | 0.005138051  |
| 0.002480125 | 0.003047422 | 0.003945165 | 0.002854063 | 0.015905354 | 0.003705645 | 0.005040687 | 0.004860275 | 0.002816054 | 0.00738456  | 0.004488618  |
| 0.004009758 | 0.002514488 | 0.004249773 | 0.00447963  | 0.009168607 | 0.002224808 | 0.003935922 | 0.003658103 | 0.002249432 | 0.006806027 | 0.009134115  |
| 0.005691577 | 0.002500652 | 0.005152661 | 0.004118467 | 0.009983533 | 0.002752682 | 0.003997324 | 0.004770265 | 0.001592736 | 0.006209464 | 0.004523185  |
| 0.004106664 | 0.001796592 | 0.00636713  | 0.006016208 | 0.002375854 | 0.002189912 | 0.003049688 | 0.005277148 | 0.004171551 | 0.005797969 | 0.012900274  |
| 0.006322699 | 0.003057676 | 0.007538119 | 0.007331299 | 0.002349509 | 0.005700946 | 0.003642531 | 0.004807439 | 0.003519416 | 0.003217679 | 0.010023913  |
| 0.007254325 | 0.002485563 | 0.007664042 | 0.007687317 | 0.002809113 | 0.004702313 | 0.004392524 | 0.005651626 | 0.00376509  | 0.003450694 | 0.010290607  |
| 0.004949109 | 0.003240543 | 0.006348883 | 0.006883978 | 0.002256532 | 0.006403613 | 0.003059893 | 0.004176464 | 0.00315579  | 0.003479483 | 0.010386186  |
| 0.005659516 | 0.002794159 | 0.005181242 | 0.005632306 | 0.001908498 | 0.006374803 | 0.002428224 | 0.003779549 | 0.003303221 | 0.003474701 | 0.014853454  |
| 0.008360114 | 0.001999072 | 0.005233953 | 0.00898707  | 0.002633156 | 0.00410434  | 0.005569497 | 0.004642799 | 0.00278021  | 0.003453618 | 0.0012691723 |
| 0.006569005 | 0.002198864 | 0.004955914 | 0.008674685 | 0.00287317  | 0.004317064 | 0.005303848 | 0.004290321 | 0.002784007 | 0.003821804 | 0.012551801  |
| 0.00528665  | 0.003333717 | 0.004256764 | 0.00573869  | 0.002262718 | 0.006534056 | 0.003514007 | 0.004780566 | 0.004390894 | 0.004771945 | 0.016208267  |
| 0.006735855 | 0.002707246 | 0.003902476 | 0.006187723 | 0.00215807  | 0.00515467  | 0.004438256 | 0.00520173  | 0.003633395 | 0.004495249 | 0.014143362  |
| 0.007266331 | 0.002862188 | 0.005267863 | 0.006701601 | 0.002306318 | 0.005466134 | 0.003237682 | 0.00492968  | 0.00344885  | 0.003673127 | 0.013130476  |
| 0.006590051 | 0.002707349 | 0.004510469 | 0.006294315 | 0.002140452 | 0.005059523 | 0.003477308 | 0.004731522 | 0.003314479 | 0.003935364 | 0.014095492  |
| 0.006422908 | 0.002532028 | 0.005665534 | 0.005504989 | 0.002342028 | 0.003685259 | 0.003480728 | 0.005382437 | 0.004576069 | 0.003957778 | 0.012406984  |
| 0.007036648 | 0.002628336 | 0.003868474 | 0.005713772 | 0.001577133 | 0.004419962 | 0.003578538 | 0.004758542 | 0.003647091 | 0.004713904 | 0.015006779  |
| 0.006932267 | 0.00271264  | 0.003947874 | 0.005553161 | 0.002197465 | 0.004244441 | 0.003358611 | 0.00469777  | 0.00334669  | 0.00392937  | 0.015172053  |
| 0.007241921 | 0.00286311  | 0.00456463  | 0.005458981 | 0.002130768 | 0.004560471 | 0.003025824 | 0.004447658 | 0.003867759 | 0.004409511 | 0.014454129  |
| 0.004361729 | 0.002568638 | 0.004081185 | 0.003952072 | 0.003097007 | 0.004940496 | 0.003928993 | 0.001173224 | 0.002847184 | 0.023173055 | 0.028112789  |
| 0.006092771 | 0.002499195 | 0.010229567 | 0.004640651 | 0.003959602 | 0.002742571 | 0.001145419 | 0.001645562 | 0.00026018  | 0.003007733 | 0.007219835  |
| 0.006927114 | 0.00383957  | 0.008242079 | 0.007702505 | 0.009073893 | 0.010951019 | 0.004239237 | 0.008627334 | 0.001286309 | 0.002201606 | 0.009499158  |
| 0.011217554 | 0.000677373 | 0.009636184 | 0.009832014 | 0.014689545 | 0.002256838 | 0.011894936 | 0.007359082 | 0.002514715 | 0.004970283 | 0.008511396  |
| 0.004486297 | 0.001918606 | 0.006654731 | 0.005180497 | 0.004965489 | 0.001827031 | 0.003590552 | 0.007171054 | 0.009303433 | 0.023638247 | 0.003863579  |
| 0.004069416 | 0.00082245  | 0.004212965 | 0.003956161 | 0.007609272 | 0.00142291  | 0.006463421 | 0.005475355 | 0.004457103 | 0.012939764 | 0.004196362  |
| 0.00341317  | 0.001418148 | 0.00470751  | 0.00331035  | 0.002644202 | 0.002950102 | 0.009362278 | 0.005450282 | 0.011872415 | 0.01684553  | 0.002457847  |
| 0.003666407 | 0.000290727 | 0.004713315 | 0.005287526 | 0.005393836 | 0.001473587 | 0.009430869 | 0.006958883 | 0.006766969 | 0.014670051 | 0.003904583  |
| 0.004160738 | 0.001320381 | 0.007853244 | 0.007088624 | 0.006658963 | 0.004703971 | 0.010449679 | 0.004383721 | 0.003378453 | 0.008489403 | 0.003781072  |
| 0.003165886 | 0.001200158 | 0.007459514 | 0.00553522  | 0.006441879 | 0.003011559 | 0.009647144 | 0.0058568   | 0.00502429  | 0.00916731  | 0.003166553  |
| 0.006526365 | 0.00133825  | 0.006811497 | 0.00464128  | 0.006274698 | 0.004009378 | 0.016499157 | 0.006210482 | 0.003701777 | 0.00819721  | 0.00265812   |
| 0.004322138 | 0.00191851  | 0.006220944 | 0.005240507 | 0.006976671 | 0.003047822 | 0.011430938 | 0.003820137 | 0.005391006 | 0.007727373 | 0.00201646   |
| 0.005794315 | 0.008061587 | 0.007771142 | 0.008756701 | 0.005154118 | 0.004240276 | 0.009574158 | 0.003019628 | 0.00482364  | 0.006913452 | 0.003412088  |
| 0.002279173 | 0.002604382 | 0.004685443 | 0.002412785 | 0.004700643 | 0.002689158 | 0.051055314 | 0.003012836 | 0.004444019 | 0.008645671 | 0.002485816  |
| 0.004841703 | 0.000594543 | 0.006662824 | 0.003889206 | 0.007634102 | 0.00330709  | 0.010280385 | 0.007867007 | 0.00281727  | 0.005735894 | 0.002954818  |
| 0.006001343 | 0.001115002 | 0.006460696 | 0.004786415 | 0.0071996   | 0.003441821 | 0.008943326 | 0.007626938 | 0.002537283 | 0.01036517  | 0.002837577  |
| 0.002283912 | 0.00114467  | 0.004701625 | 0.003342336 | 0.006387827 | 0.00182404  | 0.008029765 | 0.005644756 | 0.002840761 | 0.012322207 | 0.004355234  |
| 0.002774402 | 0.001450798 | 0.005525535 | 0.004249174 | 0.007601158 | 0.001744998 | 0.007822357 | 0.009633639 | 0.002580715 | 0.007533552 | 0.002994322  |
| 0.002695048 | 0.001215372 | 0.005975187 | 0.004154423 | 0.009192774 | 0.001896852 | 0.0064676   | 0.008456359 | 0.002946652 | 0.007899816 | 0.003057477  |
| 0.011116559 | 0.00460557  | 0.006016276 | 0.005835994 | 0.009409119 | 0.015402651 | 0.011392287 | 0.004232139 | 0.002791106 | 0.005474209 | 0.00243227   |
| 0.008440267 | 0.005374786 | 0.013358748 | 0.008900337 | 0.006529733 | 0.01323626  | 0.016314219 | 0.006936715 | 0.00820459  | 0.006106379 | 0.002358769  |
| 0.006097742 | 0.002586055 | 0.0052233   | 0.008774001 | 0.004308466 | 0.010057565 | 0.006716406 | 0.007231892 | 0.007405732 | 0.007011523 | 0.006908463  |
| 0.00378775  | 0.002636854 | 0.008111648 | 0.002340818 | 0.014093736 | 0.009534136 | 0.011983119 | 0.007612661 | 0.017952086 | 0.005701356 | 0.00700909   |
| 0.006487719 | 0.001354117 | 0.003645751 | 0.00214489  | 0.00859203  | 0.004831854 | 0.008166563 | 0.005797189 | 0.015671086 | 0.007381785 | 0.002810702  |
| 0.01005424  | 0.00367338  | 0.004081372 | 0.003809058 | 0.004087432 | 0.002494998 | 0.005350364 | 0.002107332 | 0.01573801  | 0.007991732 | 0.008055339  |
| 0.010032615 | 0.007708829 | 0.010703228 | 0.015492698 | 0.003690813 | 0.003833355 | 0.005383145 | 0.004801289 | 0.006750246 | 0.010268132 | 0.008815289  |
| 0.007535237 | 0.000788691 | 0.008968414 | 0.008295498 | 0.006749054 | 0.006549601 | 0.003927796 | 0.004323489 | 0.00214756  | 0.004534958 | 0.009500099  |
| 0.018176975 | 0.004929441 | 0.006365311 | 0.013523498 | 0.010949824 | 0.006131145 | 0.007984469 | 0.009987327 | 0.000936701 | 0.00908602  | 0.00858083   |
| 0.013725859 | 0.003454112 | 0.005461836 | 0.010923789 | 0.006800609 | 0.007199007 | 0.007737701 | 0.009705005 | 0.000622964 | 0.010064403 | 0.008591864  |
| 0.006162517 | 0.018326057 | 0.005850058 | 0.005302303 | 0.005133224 | 0.002125514 | 0.003493749 | 0.004207087 | 0.001761029 | 0.004422813 | 0.00721422   |
| 0.007100286 | 0.001000319 | 0.005077871 | 0.005823012 | 0.009035726 | 0.003915753 | 0.005365765 | 0.00432393  | 0.002399642 | 0.004453296 | 0.009016553  |
| 0.005338149 | 0.000835853 | 0.003316272 | 0.007056836 | 0.009834936 | 0.002953712 | 0.008752734 | 0.004533135 | 0.005586627 | 0.005172079 | 0.005167971  |
| 0.004362089 | 0.000767316 | 0.006777006 | 0.014056337 | 0.006598378 | 0.001898322 | 0.012754447 | 0.002598943 | 0.003648835 | 0.014009737 | 0.002271342  |
| 0.006325955 | 0.000752    | 0.008427944 | 0.008220077 | 0.00665637  | 0.00121879  | 0.005535495 | 0.001262604 | 0.002244769 | 0.006156386 | 0.002652872  |
| 0.008434567 | 0.002524165 | 0.008057369 | 0.003513678 | 0.001867529 | 0.004284987 | 0.003820949 | 0.009266679 | 0.00620613  | 0.00271839  | 0.001817851  |
| 0.004329353 | 0.002116795 | 0.004739823 | 0.003216271 | 0.004481952 | 0.029308388 | 0.003240001 | 0.034229463 | 0.015576091 | 0.004515986 | 0.005197939  |
| 0.025720868 | 0.011777409 | 0.020015049 | 0.017283438 | 0.017849467 | 0.005183147 | 0.004687489 | 0.011524279 | 0.005554141 | 0.010628577 | 0.005198785  |
| 0.022474094 | 0.007078844 | 0.004349461 | 0.005835501 | 0.009415882 | 0.005415344 | 0.008334115 | 0.015170014 | 0.001278868 | 0.011210358 | 0.009087512  |
| 0.008711226 | 0.008351591 | 0.003254975 | 0.006838986 | 0.010573974 | 0.004132541 | 0.003667046 | 0.011727099 | 0.001044966 | 0.012118939 | 0.01244026   |
| 0.060916183 | 0.018389863 | 0.057613958 | 0.036642057 | 0.04694474  | 0.002061373 | 0.007166826 | 0.003125236 | 0.000788926 | 0.006344799 | 0.003506352  |
| 0.009576002 | 0.005471942 | 0.012264658 | 0.005215168 | 0.009044358 | 0.00366372  | 0.001367732 | 0.002491766 | 0.001702553 | 0.01924127  | 0.013499821  |
| 0.017870196 | 0.014982461 | 0.022486242 | 0.02654248  | 0.018368217 | 0.003957948 | 0.003411456 | 0.008407225 | 0.002608702 | 0.005077984 | 0.005061056  |
| 0.007843904 | 0.00537587  | 0.029173496 | 0.023801101 | 0.022385685 |             |             |             |             |             |              |

|             |             |             |             |             |             |             |             |             |             |             |
|-------------|-------------|-------------|-------------|-------------|-------------|-------------|-------------|-------------|-------------|-------------|
| 0.000194084 | 0.003570657 | 0.003397706 | 0.004096728 | 0.00469554  | 0.003180835 | 0.005453814 | 0.013415619 | 0.004601259 | 0.016162547 | 0.014941755 |
| 0.005584059 | 0.002116195 | 0.005512329 | 0.003805661 | 0.003550295 | 0.002855056 | 0.003326247 | 0.007055863 | 0.003252437 | 0.009948105 | 0.007330475 |
| 0.003048829 | 0.001440884 | 0.002700731 | 0.003815295 | 0.00593732  | 0.00299979  | 0.003611099 | 0.006551839 | 0.001557719 | 0.005629298 | 0.006550408 |
| 0.004215922 | 0.00183611  | 0.004568534 | 0.004651942 | 0.008151634 | 0.003938082 | 0.007642987 | 0.006125544 | 0.00189994  | 0.006151994 | 0.006361148 |
| 0.008031733 | 0.004059635 | 0.00769139  | 0.004349205 | 0.008660057 | 0.005485478 | 0.005499675 | 0.004928363 | 0.004789951 | 0.003462969 | 0.003701754 |
| 0.005844977 | 0.000937917 | 0.002192307 | 0.000946097 | 0.008496189 | 0.008795433 | 0.009721563 | 0.004096264 | 0.006582943 | 0.005646489 | 0.001594667 |
| 0.006721492 | 0.001646297 | 0.002646007 | 0.001821952 | 0.006597298 | 0.006660283 | 0.0068576   | 0.004426611 | 0.00455789  | 0.004107464 | 0.00314686  |
| 0.005589829 | 0.001608885 | 0.002059746 | 0.001532942 | 0.006319433 | 0.006614486 | 0.005651927 | 0.004249299 | 0.004426816 | 0.003963504 | 0.00323842  |
| 0.001089062 | 0.00993582  | 0.002938242 | 0.004588609 | 0.004773015 | 0.00246962  | 0.003021172 | 0.00500002  | 0.007429494 | 0.008759118 | 0.008095741 |
| 0.001487622 | 0.002560188 | 0.003348856 | 0.004237235 | 0.008611315 | 0.008474115 | 0.006243061 | 0.005349606 | 0.002435856 | 0.006601537 | 0.004036373 |
| 0.001559141 | 0.001917859 | 0.00218971  | 0.002908823 | 0.003717432 | 0.007340599 | 0.007361083 | 0.004608233 | 0.0045476   | 0.011617846 | 0.003403756 |
| 0.015937824 | 0.002175519 | 0.001955346 | 0.003566222 | 0.006663111 | 0.003914167 | 0.004218215 | 0.005158327 | 0.002837567 | 0.004195888 | 0.002882212 |
| 0.00580302  | 0.001945211 | 0.005133115 | 0.002857816 | 0.00416459  | 0.00330602  | 0.001783501 | 0.003530324 | 0.003751316 | 0.008164725 | 0.004705575 |
| 0.001539931 | 0.000882654 | 0.002318673 | 0.001372792 | 0.00381336  | 0.00185747  | 0.005256952 | 0.00462443  | 0.00175706  | 0.00171762  | 0.003452505 |
| 0.002367334 | 0.000643961 | 0.003126814 | 0.004446903 | 0.005106711 | 0.004739818 | 0.001342129 | 0.00776371  | 0.001170746 | 0.004250515 | 0.000772256 |
| 0.003401952 | 0.002018584 | 0.001413547 | 0.000847545 | 0.002228    | 0.008320987 | 0.004390076 | 0.002507054 | 0.000595679 | 0.006410652 | 0.005507668 |
| 0.003555829 | 0.001123577 | 0.002379353 | 0.001798522 | 0.002787122 | 0.002926895 | 0.001607966 | 0.004247441 | 0.000420202 | 0.003319555 | 0.00558498  |
| 0.002493835 | 0.001291565 | 0.002718096 | 0.002644595 | 0.001377321 | 0.002765899 | 0.001557597 | 0.004476164 | 0.000632107 | 0.004168343 | 0.004272314 |
| 0.002007116 | 0.000995496 | 0.002585692 | 0.001898651 | 0.001910831 | 0.002855502 | 0.001442692 | 0.004162703 | 0.000965207 | 0.004361269 | 0.003564956 |

| CP_65       | CP_66       | CP_67       | CP_68       | CP_69       | CP_70       | CP_71       | CP_72       | CP_73       | CPR_01      | CPR_02      |
|-------------|-------------|-------------|-------------|-------------|-------------|-------------|-------------|-------------|-------------|-------------|
| 0.004765922 | 0.002050703 | 0.004796419 | 0.004140445 | 0.004512421 | 0.007460246 | 0.00389386  | 0.000262015 | 0.003117067 | 0.006723181 | 0.001184621 |
| 0.003455878 | 0.002708295 | 0.00394425  | 0.003474765 | 0.003933642 | 0.005569897 | 0.00341036  | 0.000226011 | 0.003578129 | 0.007238535 | 0.016732292 |
| 0.003685389 | 0.002668684 | 0.003767534 | 0.003672439 | 0.003170906 | 0.008912593 | 0.003465034 | 0.000235897 | 0.003172603 | 0.009054967 | 0.002297736 |
| 0.00393682  | 0.002686193 | 0.004151853 | 0.003764748 | 0.003400335 | 0.005551088 | 0.003517376 | 0.000357803 | 0.003241788 | 0.009385875 | 0.003218788 |
| 0.003927124 | 0.002966268 | 0.003840302 | 0.004104432 | 0.002900953 | 0.00389972  | 0.003891352 | 0.000218263 | 0.003920596 | 0.008812687 | 0.003459519 |
| 0.004079525 | 0.003449664 | 0.003903983 | 0.004163013 | 0.00288945  | 0.004302    | 0.004238899 | 0.000332907 | 0.00359245  | 0.00820294  | 0.002626819 |
| 0.005323758 | 0.00350514  | 0.006716076 | 0.005931071 | 0.002891849 | 0.003378473 | 0.003048892 | 0.000394722 | 0.005149287 | 0.009613945 | 0.002572623 |
| 0.005019824 | 0.003088661 | 0.004608391 | 0.005229221 | 0.002579772 | 0.002941094 | 0.003250229 | 0.000274198 | 0.004826563 | 0.007096858 | 0.002156331 |
| 0.005451195 | 0.002465482 | 0.005822258 | 0.005221183 | 0.004019439 | 0.003917734 | 0.002581989 | 0.006981686 | 0.003731725 | 0.007501607 | 0.001806347 |
| 0.005449955 | 0.003535893 | 0.008414323 | 0.005984916 | 0.003137767 | 0.003396025 | 0.002871207 | 0.008534928 | 0.004078496 | 0.008806148 | 0.002583161 |
| 0.005202901 | 0.003332196 | 0.009372882 | 0.00552635  | 0.003317461 | 0.00456374  | 0.00266806  | 0.011931159 | 0.003682565 | 0.007999055 | 0.001926863 |
| 0.003470226 | 0.00392299  | 0.002486837 | 0.004013325 | 0.004755534 | 0.005960252 | 0.003608438 | 0.000300543 | 0.002513037 | 0.004023778 | 0.001716839 |
| 0.003171376 | 0.004082697 | 0.002532505 | 0.003430114 | 0.005000349 | 0.005674822 | 0.00355251  | 0.000323397 | 0.002145727 | 0.00407938  | 0.001701396 |
| 0.005464532 | 0.002265489 | 0.00266347  | 0.002774586 | 0.005578005 | 0.003162013 | 0.002982508 | 0.001418605 | 0.002742345 | 0.008141604 | 0.004879654 |
| 0.004745368 | 0.001294855 | 0.002764269 | 0.006092662 | 0.002183799 | 0.001938132 | 0.003734531 | 0.000592597 | 0.005077659 | 0.006569574 | 0.002575968 |
| 0.006037219 | 0.002756305 | 0.005731141 | 0.006904438 | 0.002528472 | 0.003561147 | 0.002949692 | 0.000441842 | 0.006080029 | 0.00779705  | 0.001999823 |
| 0.0069987   | 0.003064115 | 0.005380592 | 0.008415581 | 0.002821527 | 0.003172956 | 0.002861667 | 0.000283185 | 0.00658789  | 0.006134527 | 0.001687075 |
| 0.007647008 | 0.003410288 | 0.00664724  | 0.011555522 | 0.002056158 | 0.002940804 | 0.002528515 | 0.000484771 | 0.007488108 | 0.004941445 | 0.001816954 |
| 0.007454954 | 0.002833849 | 0.006430514 | 0.008178081 | 0.002281291 | 0.002678641 | 0.002975624 | 0.00051846  | 0.007703848 | 0.006237263 | 0.002375481 |
| 0.007631072 | 0.002873537 | 0.006911183 | 0.009008853 | 0.002128289 | 0.002953004 | 0.003256492 | 0.000648211 | 0.007482603 | 0.00629017  | 0.002137472 |
| 0.0062818   | 0.002699151 | 0.006096824 | 0.007382128 | 0.002314838 | 0.003400904 | 0.003005954 | 0.000575575 | 0.007195079 | 0.006740574 | 0.001955631 |
| 0.0104462   | 0.003432081 | 0.004644003 | 0.011329931 | 0.001720284 | 0.001888602 | 0.003143365 | 0.000800028 | 0.00537176  | 0.003516132 | 0.00120384  |
| 0.009336581 | 0.001729508 | 0.002445972 | 0.011354869 | 0.00214811  | 0.002037855 | 0.002200415 | 0.00049837  | 0.004418096 | 0.00469039  | 0.001883725 |
| 0.001908525 | 0.001950248 | 0.002441191 | 0.003729089 | 0.008427883 | 0.004390784 | 0.003067422 | 0.00047646  | 0.0071385   | 0.007595362 | 0.00753732  |
| 0.002892214 | 0.002687624 | 0.002928416 | 0.004212628 | 0.007629999 | 0.005134238 | 0.002697207 | 0.001245869 | 0.005685337 | 0.012460164 | 0.011078248 |
| 0.006235017 | 0.001903068 | 0.002685352 | 0.003877888 | 0.006126844 | 0.004377172 | 0.003567825 | 0.000200355 | 0.004811459 | 0.005159579 | 0.006308052 |
| 0.00272183  | 0.002221711 | 0.002748101 | 0.00360538  | 0.0050894   | 0.003910846 | 0.004605361 | 0.000345606 | 0.004967704 | 0.009614148 | 0.005099851 |
| 0.003807521 | 0.00158239  | 0.002480872 | 0.006151198 | 0.004571481 | 0.003160849 | 0.002433977 | 0.001134167 | 0.004423291 | 0.008960279 | 0.007082466 |
| 0.002541656 | 0.001160589 | 0.002584273 | 0.003929215 | 0.005045635 | 0.002063802 | 0.003202061 | 0.000548251 | 0.005235791 | 0.008502971 | 0.005645051 |
| 0.00414043  | 0.001972454 | 0.003561992 | 0.006405728 | 0.004990155 | 0.001553355 | 0.001771479 | 0.0046149   | 0.009121113 | 0.006370062 | 0.00828026  |
| 0.005993631 | 0.004725645 | 0.009051992 | 0.008844224 | 0.005821103 | 0.002865181 | 0.004385894 | 0.005252363 | 0.007810253 | 0.010008682 | 0.012099546 |
| 0.006280501 | 0.004521548 | 0.008839365 | 0.00874568  | 0.005729691 | 0.002863171 | 0.004362027 | 0.00528414  | 0.007856899 | 0.010478653 | 0.011186986 |
| 0.004047613 | 0.002405604 | 0.00606879  | 0.004505455 | 0.007310472 | 0.003913762 | 0.003125941 | 0.007799374 | 0.004299697 | 0.009631722 | 0.003309596 |
| 0.004887647 | 0.002595313 | 0.00633672  | 0.005702085 | 0.002846676 | 0.00324154  | 0.002354037 | 0.005949057 | 0.003302147 | 0.011070964 | 0.00678014  |
| 0.004665232 | 0.002598844 | 0.006356151 | 0.005700589 | 0.003677544 | 0.003808632 | 0.002869353 | 0.004864364 | 0.003927616 | 0.013401787 | 0.004048032 |
| 0.004534638 | 0.001939562 | 0.004038665 | 0.006178438 | 0.003565483 | 0.002707535 | 0.004341226 | 0.00031859  | 0.006086637 | 0.007253111 | 0.00148912  |
| 0.00430176  | 0.001908705 | 0.003564722 | 0.005101725 | 0.003329511 | 0.002923736 | 0.005738954 | 0.00028722  | 0.00501289  | 0.009135156 | 0.002532425 |
| 0.002992012 | 0.002145937 | 0.003718754 | 0.003273252 | 0.004718457 | 0.003594678 | 0.004829471 | 0.000211961 | 0.00400878  | 0.011004618 | 0.00506833  |
| 0.003853153 | 0.002705721 | 0.004654084 | 0.004375635 | 0.004492047 | 0.003787811 | 0.003801743 | 0.000390539 | 0.004161948 | 0.012597223 | 0.007195777 |
| 0.003360731 | 0.002133095 | 0.003650421 | 0.003657661 | 0.003809954 | 0.003582239 | 0.003878455 | 0.001220775 | 0.004723485 | 0.013370726 | 0.010681065 |
| 0.004389282 | 0.003106284 | 0.005027819 | 0.00486664  | 0.003135093 | 0.003609645 | 0.003149249 | 0.000430693 | 0.004381296 | 0.011911005 | 0.00492508  |
| 0.00420748  | 0.002280272 | 0.004287204 | 0.004662939 | 0.003134261 | 0.003386821 | 0.003134239 | 0.000660483 | 0.004982999 | 0.012400082 | 0.005017303 |
| 0.003712317 | 0.002701205 | 0.003046971 | 0.003407757 | 0.004007573 | 0.00387701  | 0.003720447 | 0.001013166 | 0.005420654 | 0.012950097 | 0.01286606  |
| 0.003193815 | 0.001727386 | 0.002796421 | 0.003989231 | 0.004564238 | 0.004569113 | 0.003939616 | 0.00104688  | 0.006172603 | 0.010514983 | 0.010920865 |
| 0.003409703 | 0.001439228 | 0.002740449 | 0.004564805 | 0.004577963 | 0.00444052  | 0.004527446 | 0.00133196  | 0.005094629 | 0.010116463 | 0.01614305  |
| 0.002510946 | 0.0019686   | 0.003967575 | 0.003502555 | 0.004323237 | 0.002656817 | 0.004014425 | 0.005198066 | 0.007754187 | 0.007481151 | 0.009301707 |
| 0.003725171 | 0.001767856 | 0.003937802 | 0.004523074 | 0.003937737 | 0.003627969 | 0.003688094 | 0.001038192 | 0.00597628  | 0.011138081 | 0.009419104 |
| 0.004574195 | 0.00201023  | 0.004534489 | 0.005228123 | 0.002972025 | 0.003286876 | 0.003880745 | 0.000929318 | 0.006304516 | 0.009593413 | 0.005083155 |
| 0.00445781  | 0.001953067 | 0.004284967 | 0.00516063  | 0.003003023 | 0.003518988 | 0.002973662 | 0.000695223 | 0.006009341 | 0.010247663 | 0.004255452 |
| 0.004774728 | 0.001735781 | 0.004017709 | 0.005790867 | 0.003360013 | 0.002592078 | 0.00407155  | 0.000991404 | 0.005720509 | 0.008717742 | 0.004138441 |
| 0.004684945 | 0.001561887 | 0.003640912 | 0.005535812 | 0.003602124 | 0.004595032 | 0.004482666 | 0.00114285  | 0.009362135 | 0.0092697   | 0.004122833 |
| 0.003330862 | 0.00139724  | 0.0023721   | 0.003363885 | 0.006568836 | 0.00471626  | 0.003968218 | 0.000208743 | 0.007863142 | 0.004771448 | 0.007062182 |
| 0.005550056 | 0.002471219 | 0.003349071 | 0.003486107 | 0.008311911 | 0.004624835 | 0.003419821 | 0.00019164  | 0.00461537  | 0.011896622 | 0.007557961 |
| 0.002949231 | 0.001165994 | 0.0022208   | 0.002803228 | 0.003647638 | 0.004165171 | 0.003171931 | 0.000525451 | 0.00388559  | 0.008272294 | 0.015718989 |
| 0.003766709 | 0.001700662 | 0.003011683 | 0.002408596 | 0.005280555 | 0.00473603  | 0.004389124 | 0.000691967 | 0.004373081 | 0.004499022 | 0.011134666 |
| 0.002320263 | 0.001291838 | 0.003160446 | 0.002166771 | 0.005181296 | 0.003014376 | 0.005171712 | 0.005715039 | 0.007935489 | 0.01054187  | 0.01276338  |
| 0.002289466 | 0.001329175 | 0.001190175 | 0.002545222 | 0.006872542 | 0.00388459  | 0.005424028 | 0.006621856 | 0.005110959 | 0.011653416 | 0.015080706 |
| 0.003594639 | 0.001656428 | 0.002612346 | 0.003150522 | 0.005529421 | 0.004136132 | 0.004780818 | 0.000755662 | 0.005964537 | 0.007750764 | 0.011795487 |
| 0.003005689 | 0.001951578 | 0.002828711 | 0.003551737 | 0.004475483 | 0.00325723  | 0.003164512 | 0.001158918 | 0.004712343 | 0.012584964 | 0.018047191 |
| 0.004460469 | 0.001526201 | 0.003349255 | 0.004633026 | 0.003886546 | 0.002881714 | 0.003486915 | 0.001322037 | 0.005063598 | 0.010215917 | 0.010462611 |
| 0.003336957 | 0.001929602 | 0.00387264  | 0.004143633 | 0.004429679 | 0.003346272 | 0.004564315 | 0.001811821 | 0.005902798 | 0.011260684 | 0.012804122 |
| 0.003113822 | 0.002303097 | 0.003312496 | 0.003272375 | 0.005048738 | 0.003662162 | 0.004381687 | 0.00242083  | 0.005444721 | 0.012583706 | 0.015916199 |
| 0.003123034 | 0.00188681  | 0.002312817 | 0.002476845 | 0.005109182 | 0.004041647 | 0.003584009 | 0.000791589 | 0.00831253  | 0.012352989 | 0.012582725 |
| 0.002836497 | 0.00176983  | 0.002757942 | 0.003612587 | 0.003595305 | 0.00412734  | 0.004568985 | 0.000925422 | 0.004695119 | 0.011439201 | 0.010216128 |
| 0.003477372 | 0.001618663 | 0.002515174 | 0.003681893 | 0.003457893 | 0.002405868 | 0.00303938  | 0.00408401  | 0.007111924 | 0.006311509 | 0.008857684 |
| 0.002689775 | 0.000867127 | 0.001831813 | 0.003336418 | 0.004000503 | 0.002587871 | 0.002398715 | 0.004358286 | 0.005996083 | 0.007182095 | 0.010321886 |
| 0.003652048 | 0.000940934 | 0.001120646 | 0.003060608 | 0.003656128 | 0.002688589 | 0.00327474  | 0.003733603 | 0.005280742 | 0.00767645  | 0.011066047 |
| 0.001709715 | 0.000617365 | 0.001312521 | 0.002890833 | 0.004696432 | 0.003694662 | 0.002221391 | 0.00514474  | 0.007665431 | 0.005845383 | 0.00854174  |
| 0.003849766 | 0.002461731 | 0.003       |             |             |             |             |             |             |             |             |

|             |             |             |              |             |             |             |             |             |             |             |
|-------------|-------------|-------------|--------------|-------------|-------------|-------------|-------------|-------------|-------------|-------------|
| 0.005550104 | 0.006538068 | 0.011400352 | 0.002836763  | 0.005536162 | 0.008013904 | 0.002373853 | 0.009769217 | 0.009881508 | 0.013085924 | 0.006168202 |
| 0.004768358 | 0.005373783 | 0.008612544 | 0.003093407  | 0.005045623 | 0.007315335 | 0.003287008 | 0.011495325 | 0.009686848 | 0.010008483 | 0.006602554 |
| 0.004523316 | 0.00662124  | 0.00899551  | 0.003476421  | 0.005431675 | 0.005646862 | 0.003297633 | 0.011072194 | 0.011822045 | 0.006422077 | 0.00618221  |
| 0.005140238 | 0.008772456 | 0.008261894 | 0.003904841  | 0.003760858 | 0.008189846 | 0.005870723 | 0.012809712 | 0.009362625 | 0.009740752 | 0.006351584 |
| 0.007454554 | 0.006650804 | 0.011766475 | 0.004723863  | 0.005207504 | 0.005468973 | 0.007164657 | 0.01805103  | 0.009993031 | 0.006126604 | 0.004658191 |
| 0.007519676 | 0.006833339 | 0.010818254 | 0.005414675  | 0.005487139 | 0.005220318 | 0.007182865 | 0.017837093 | 0.009509733 | 0.005323264 | 0.004550166 |
| 0.005336045 | 0.004356008 | 0.01524745  | 0.003080498  | 0.006189689 | 0.006267005 | 0.005349935 | 0.009759051 | 0.007085331 | 0.008787288 | 0.005170934 |
| 0.004410881 | 0.005191921 | 0.013914871 | 0.002312389  | 0.005105211 | 0.007339146 | 0.004765778 | 0.009657413 | 0.007043906 | 0.008106604 | 0.004771037 |
| 0.007903593 | 0.006254196 | 0.015302455 | 0.002225361  | 0.003262302 | 0.008086544 | 0.005657556 | 0.010607296 | 0.003905016 | 0.005612709 | 0.006136905 |
| 0.005619261 | 0.005537497 | 0.012376546 | 0.002642634  | 0.003320327 | 0.008350443 | 0.003898189 | 0.008599631 | 0.004299495 | 0.007608566 | 0.004780712 |
| 0.005939141 | 0.004409083 | 0.012611503 | 0.002671534  | 0.003293248 | 0.008441032 | 0.004267519 | 0.011676725 | 0.00507151  | 0.007274532 | 0.005792437 |
| 0.019294257 | 0.032299726 | 0.005281577 | 0.016835367  | 0.001909627 | 0.002766712 | 0.008605822 | 0.002718005 | 0.004231761 | 0.002125029 | 0.003955312 |
| 0.013107202 | 0.006751882 | 0.001999037 | 0.016585309  | 0.001599035 | 0.003568155 | 0.004696369 | 0.002936564 | 0.008010685 | 0.003605139 | 0.006558449 |
| 0.013899149 | 0.009352905 | 0.002221064 | 0.014167319  | 0.001635225 | 0.002926757 | 0.004851539 | 0.002801993 | 0.006135832 | 0.003186584 | 0.005145393 |
| 0.012883527 | 0.004822319 | 0.002328944 | 0.018704068  | 0.001888283 | 0.004450946 | 0.004075571 | 0.002809844 | 0.009402031 | 0.003565231 | 0.007084832 |
| 0.016369775 | 0.008740925 | 0.002754289 | 0.020547406  | 0.001709456 | 0.003224266 | 0.00439803  | 0.003013386 | 0.007535676 | 0.003509344 | 0.009211051 |
| 0.018188388 | 0.015204298 | 0.003033137 | 0.018251386  | 0.001754168 | 0.002962747 | 0.005712289 | 0.003678938 | 0.0022691   | 0.00305126  | 0.011395972 |
| 0.013891534 | 0.010385557 | 0.002995356 | 0.017136776  | 0.001936398 | 0.002439904 | 0.005320756 | 0.003345019 | 0.003917433 | 0.003429543 | 0.012578277 |
| 0.018640047 | 0.012866079 | 0.003871144 | 0.018067801  | 0.001606172 | 0.004532275 | 0.005660171 | 0.003733222 | 0.007021217 | 0.00296083  | 0.009834898 |
| 0.017661468 | 0.014375102 | 0.003282636 | 0.018125126  | 0.001882418 | 0.00359761  | 0.005458337 | 0.003864412 | 0.00430231  | 0.002352981 | 0.012420901 |
| 0.015749032 | 0.010376147 | 0.003255906 | 0.018217901  | 0.001778166 | 0.003226928 | 0.004440831 | 0.003215397 | 0.005356051 | 0.002862633 | 0.009709352 |
| 0.015863363 | 0.010177575 | 0.003042085 | 0.01870453   | 0.002112272 | 0.003195556 | 0.004692012 | 0.003241303 | 0.005842451 | 0.002893872 | 0.011537492 |
| 0.017537951 | 0.019321484 | 0.003622995 | 0.018698686  | 0.001891245 | 0.002947217 | 0.005276184 | 0.003339473 | 0.004604119 | 0.00236563  | 0.006751696 |
| 0.018318161 | 0.020315613 | 0.00385143  | 0.021168937  | 0.00163638  | 0.00299104  | 0.004824453 | 0.004168308 | 0.003807796 | 0.002109461 | 0.011696988 |
| 0.016848599 | 0.014693723 | 0.003334445 | 0.020800149  | 0.002238011 | 0.003177792 | 0.00471046  | 0.003790937 | 0.004933744 | 0.002160413 | 0.010880619 |
| 0.017296897 | 0.015678003 | 0.00397992  | 0.020602625  | 0.002103633 | 0.002976106 | 0.004691572 | 0.003641955 | 0.004585895 | 0.002192516 | 0.009185954 |
| 0.00349148  | 0.002641951 | 0.002609743 | 0.004932338  | 0.004589778 | 0.005836176 | 0.004573568 | 0.00392675  | 0.008610588 | 0.003498057 | 0.004020617 |
| 0.007187889 | 0.001939899 | 0.010349174 | 0.0061722    | 0.008724258 | 0.003226928 | 0.001753167 | 0.019782696 | 0.015813739 | 0.005114775 | 0.00565634  |
| 0.006528684 | 0.003154549 | 0.004628719 | 0.005464191  | 0.007763432 | 0.006923682 | 0.007506522 | 0.013194439 | 0.027933214 | 0.003119423 | 0.004071473 |
| 0.006913992 | 0.017859401 | 0.010850818 | 0.005059232  | 0.008714436 | 0.006377209 | 0.006797317 | 0.00266453  | 0.005197181 | 0.001715359 | 0.001577367 |
| 0.006661626 | 0.003976657 | 0.007512403 | 0.005210972  | 0.00749279  | 0.010325546 | 0.010412405 | 0.00465063  | 0.001985355 | 0.001048948 | 0.000931389 |
| 0.007487977 | 0.02325511  | 0.013499628 | 0.004228019  | 0.006959735 | 0.010819043 | 0.006695726 | 0.003906194 | 0.001246137 | 0.003003951 | 0.003350607 |
| 0.006163327 | 0.012190239 | 0.007817849 | 0.004479177  | 0.009313401 | 0.012963516 | 0.010679448 | 0.007105635 | 0.002077739 | 0.0017471   | 0.003093635 |
| 0.006235917 | 0.009416925 | 0.013772086 | 0.003778033  | 0.010562736 | 0.024132572 | 0.008232496 | 0.010485535 | 0.002311768 | 0.001538331 | 0.002181171 |
| 0.007210121 | 0.013348664 | 0.012778655 | 0.006962573  | 0.008612836 | 0.010995456 | 0.004874563 | 0.00357116  | 0.00323886  | 0.001382059 | 0.002571081 |
| 0.00656543  | 0.016420194 | 0.012892399 | 0.004672967  | 0.010003003 | 0.011450801 | 0.007425398 | 0.001304825 | 0.00379643  | 0.001946652 | 0.003294443 |
| 0.005317437 | 0.014571249 | 0.012719878 | 0.004038154  | 0.008815673 | 0.00935782  | 0.006092622 | 0.000519582 | 0.003277662 | 0.001787057 | 0.002872711 |
| 0.003960364 | 0.016912052 | 0.013352865 | 0.003259647  | 0.010222706 | 0.017786179 | 0.007473244 | 0.003841732 | 0.002450551 | 0.002635709 | 0.002611302 |
| 0.004115786 | 0.016902799 | 0.012553516 | 0.006977263  | 0.009245955 | 0.012619148 | 0.005928203 | 0.003801904 | 0.001762236 | 0.001771426 | 0.002344988 |
| 0.003245277 | 0.008108825 | 0.006067013 | 0.003308488  | 0.011655721 | 0.010882298 | 0.006234071 | 0.003994741 | 0.005636933 | 0.001867811 | 0.00411864  |
| 0.003707112 | 0.013248654 | 0.010809254 | 0.002968864  | 0.008860568 | 0.009006459 | 0.008887339 | 0.001423753 | 0.005003803 | 0.00145632  | 0.002326191 |
| 0.00454323  | 0.013088528 | 0.010824143 | 0.00301791   | 0.010076189 | 0.012131405 | 0.008477148 | 0.001403867 | 0.00463962  | 0.001454311 | 0.002584428 |
| 0.007732585 | 0.019204304 | 0.015863667 | 0.003488478  | 0.014316964 | 0.014341043 | 0.007530198 | 0.002864005 | 0.003253516 | 0.002146419 | 0.002923154 |
| 0.005865199 | 0.013195651 | 0.009362314 | 0.003457844  | 0.019029746 | 0.008963738 | 0.004550685 | 0.001845127 | 0.005178867 | 0.002633103 | 0.002977517 |
| 0.005613872 | 0.01314349  | 0.008637571 | 0.003734392  | 0.018768575 | 0.009339233 | 0.005139635 | 0.001476512 | 0.004769867 | 0.002501021 | 0.003380316 |
| 0.004011035 | 0.007651429 | 0.005563293 | 0.003376593  | 0.007094246 | 0.010885965 | 0.005910125 | 0.012358455 | 0.007893452 | 0.006491426 | 0.008706179 |
| 0.005642089 | 0.009860853 | 0.006300205 | 0.003515374  | 0.008765495 | 0.00837025  | 0.005146983 | 0.005848876 | 0.005763202 | 0.003624518 | 0.005284968 |
| 0.004992615 | 0.007821547 | 0.008417101 | 0.002660465  | 0.011441539 | 0.007760189 | 0.006497584 | 0.007683448 | 0.006414481 | 0.002631005 | 0.003799605 |
| 0.004267125 | 0.007873618 | 0.007631556 | 0.003671124  | 0.01465853  | 0.01273926  | 0.044358482 | 0.045705723 | 0.007644448 | 0.001983962 | 0.004143899 |
| 0.003675009 | 0.006840173 | 0.006259233 | 0.003065304  | 0.010347948 | 0.01926904  | 0.050331434 | 0.052731008 | 0.00598996  | 0.002670932 | 0.003601284 |
| 0.006893567 | 0.020285373 | 0.009994583 | 0.006062607  | 0.006732367 | 0.010609722 | 0.005107581 | 0.00339341  | 0.001459993 | 0.001475108 | 0.003139477 |
| 0.007159309 | 0.002950631 | 0.005557662 | 0.024040076  | 0.001840942 | 0.002411205 | 0.005286217 | 0.002265458 | 0.002786326 | 0.002014721 | 0.004142721 |
| 0.006876966 | 0.000954213 | 0.001323895 | 0.003519749  | 0.003459099 | 0.01166068  | 0.00698106  | 0.004345437 | 0.023528581 | 0.004810903 | 0.002575481 |
| 0.005052835 | 0.004060027 | 0.005523091 | 0.003521133  | 0.005869497 | 0.008530054 | 0.008594504 | 0.009832932 | 0.00617077  | 0.005446504 | 0.006012265 |
| 0.004329632 | 0.003290147 | 0.004986715 | 0.003614831  | 0.007028588 | 0.012277634 | 0.010564779 | 0.015666997 | 0.006974742 | 0.005287886 | 0.00573728  |
| 0.005238767 | 0.004404241 | 0.040863563 | 0.005766508  | 0.003986769 | 0.005650187 | 0.005440066 | 0.007049847 | 0.006978018 | 0.00183222  | 0.00328597  |
| 0.007825258 | 0.004015556 | 0.006554339 | 0.005278272  | 0.009571659 | 0.00835565  | 0.007330365 | 0.005502921 | 0.009011601 | 0.000463311 | 0.000528574 |
| 0.004026464 | 0.004162234 | 0.001278995 | 0.00610358   | 0.005195397 | 0.012421224 | 0.003249707 | 0.000875993 | 0.004806661 | 0.001861657 | 0.003552616 |
| 0.003759682 | 0.002832572 | 0.002574954 | 0.004299561  | 0.007233863 | 0.006620166 | 0.00674637  | 0.002698671 | 0.005537013 | 0.00107659  | 0.002815688 |
| 0.003374379 | 0.004857682 | 0.001692554 | 0.007115343  | 0.011507094 | 0.007635285 | 0.006821874 | 0.001610532 | 0.011536239 | 0.001191948 | 0.003264458 |
| 0.001426243 | 0.002776864 | 0.001912371 | 0.004263476  | 0.00730068  | 0.003310138 | 0.003268552 | 0.005007074 | 0.005849697 | 0.0033677   | 0.004869363 |
| 0.002757915 | 0.002853216 | 0.0028332   | 0.003975174  | 0.004642721 | 0.004839781 | 0.027258587 | 0.004259381 | 0.004804727 | 0.001986672 | 0.003361975 |
| 0.010545977 | 0.008962577 | 0.005409105 | 0.0062929    | 0.008945257 | 0.0103769   | 0.006328568 | 0.007686247 | 0.004457886 | 0.001061462 | 0.002446709 |
| 0.00570728  | 0.005437134 | 0.007251608 | 0.006162272  | 0.006865336 | 0.008723961 | 0.013892334 | 0.008414524 | 0.007696653 | 0.001145063 | 0.003490014 |
| 0.007497456 | 0.008157923 | 0.009297814 | 0.007207928  | 0.006293118 | 0.012350922 | 0.008378027 | 0.008998936 | 0.006463073 | 0.003005057 | 0.003356853 |
| 0.002775066 | 0.00736189  | 0.004140149 | 0.00279598   | 0.005788917 | 0.006153835 | 0.005165769 | 0.006144361 | 0.002449093 | 0.002096499 | 0.003594331 |
| 0.00184496  | 0.003481414 | 0.003900454 | 0.0040222304 | 0.016456411 | 0.004536015 | 0.002098321 | 0.014429689 | 0.009845274 | 0.002322233 | 0.0020672   |
| 0.003526796 | 0.003699517 | 0.00373436  | 0.00322208   | 0.005641407 | 0.006823259 | 0.002814324 | 0.007727973 | 0.005630631 | 0.002831982 | 0.00229797  |
| 0.003744307 | 0.003080262 | 0.002579255 | 0.004321926  |             |             |             |             |             |             |             |

|             |             |             |             |             |             |             |             |             |             |             |
|-------------|-------------|-------------|-------------|-------------|-------------|-------------|-------------|-------------|-------------|-------------|
| 0.008070023 | 0.012514837 | 0.014309105 | 0.009967025 | 0.008079494 | 0.012755696 | 0.013673288 | 0.015546638 | 0.019818077 | 0.003481787 | 0.007877184 |
| 0.006814335 | 0.005233818 | 0.00675984  | 0.005635233 | 0.006972027 | 0.010616903 | 0.007299477 | 0.011573141 | 0.014832832 | 0.006602048 | 0.010992039 |
| 0.004722468 | 0.004612993 | 0.006258281 | 0.003615873 | 0.006495213 | 0.003982254 | 0.004732932 | 0.01000719  | 0.008964385 | 0.004612175 | 0.006765703 |
| 0.004974633 | 0.005500204 | 0.007072797 | 0.00512047  | 0.008907956 | 0.006662454 | 0.00702513  | 0.011597595 | 0.008794983 | 0.007293399 | 0.01201656  |
| 0.002408883 | 0.002216597 | 0.00360116  | 0.003636254 | 0.02423201  | 0.00286809  | 0.018474752 | 0.021416095 | 0.002608369 | 0.003820873 | 0.00396991  |
| 0.003637092 | 0.005258944 | 0.00731895  | 0.002948155 | 0.014401555 | 0.009612368 | 0.016430181 | 0.023204495 | 0.001418251 | 0.005517432 | 0.006025398 |
| 0.002965756 | 0.00337254  | 0.003002899 | 0.002333267 | 0.02371713  | 0.006887365 | 0.029682914 | 0.039473791 | 0.002187805 | 0.003994117 | 0.00774436  |
| 0.002788484 | 0.002960885 | 0.002759135 | 0.001983072 | 0.025449804 | 0.007002418 | 0.026980236 | 0.033943282 | 0.002316406 | 0.004050133 | 0.006539572 |
| 0.005691748 | 0.010702453 | 0.006669586 | 0.004997094 | 0.01038768  | 0.015909501 | 0.004590333 | 0.007290557 | 0.003475797 | 0.002762485 | 0.008523559 |
| 0.007887449 | 0.00573768  | 0.004667988 | 0.002557416 | 0.008323167 | 0.011522306 | 0.016417717 | 0.017688809 | 0.001774151 | 0.004251884 | 0.003439839 |
| 0.006402424 | 0.005401755 | 0.004049287 | 0.002096645 | 0.009613926 | 0.005040237 | 0.015588614 | 0.020712951 | 0.001511453 | 0.005370324 | 0.003851459 |
| 0.002750917 | 0.011288873 | 0.00317029  | 0.001574123 | 0.005911701 | 0.004353773 | 0.004850718 | 0.007409426 | 0.00397271  | 0.007920644 | 0.00634347  |
| 0.004913016 | 0.007336755 | 0.004201205 | 0.004396197 | 0.007803759 | 0.005593208 | 0.005391542 | 0.011282186 | 0.009637574 | 0.007299976 | 0.008804126 |
| 0.003006728 | 0.002543318 | 0.003945888 | 0.001965496 | 0.003613808 | 0.004490146 | 0.002760382 | 0.00496979  | 0.006830015 | 0.00870744  | 0.007042282 |
| 0.006226882 | 0.009438777 | 0.001359348 | 0.004405294 | 0.011447926 | 0.007418284 | 0.005975903 | 0.010434493 | 0.007265193 | 0.001198573 | 0.003995411 |
| 0.004530368 | 0.005099945 | 0.011028681 | 0.003640897 | 0.004887726 | 0.001930101 | 0.002613389 | 0.008010872 | 0.008120489 | 0.002431608 | 0.003428543 |
| 0.006900568 | 0.00635737  | 0.007055455 | 0.005122352 | 0.003845669 | 0.003702956 | 0.003512572 | 0.005683179 | 0.004815267 | 0.002646041 | 0.005800055 |
| 0.004803986 | 0.006203025 | 0.003471274 | 0.004159859 | 0.002860101 | 0.003816171 | 0.002883862 | 0.003973285 | 0.002628632 | 0.002724127 | 0.005734876 |
| 0.005749335 | 0.007385407 | 0.003544248 | 0.003712642 | 0.004387752 | 0.005935145 | 0.003053292 | 0.004163338 | 0.002434587 | 0.002500782 | 0.00443329  |

| CPR_03      | CPR_04      | CPR_05      | CPR_06      | CPR_07      | CPR_08      | CPR_09      | CPR_10       | CPR_11      | CPR_12      | CPR_13      |
|-------------|-------------|-------------|-------------|-------------|-------------|-------------|--------------|-------------|-------------|-------------|
| 0.00136386  | 0.002235813 | 0.005703607 | 0.004408111 | 0.00613673  | 0.003530052 | 0.008234008 | 0.009223065  | 0.010636963 | 0.007114907 | 0.00934107  |
| 0.002562769 | 0.012731116 | 0.005727918 | 0.004976546 | 0.004703223 | 0.004721949 | 0.008808867 | 0.006650998  | 0.010942164 | 0.006718113 | 0.008489343 |
| 0.001785009 | 0.002250047 | 0.00739433  | 0.006232597 | 0.004078021 | 0.003732678 | 0.009524158 | 0.006223445  | 0.013432371 | 0.007843159 | 0.009100174 |
| 0.003133781 | 0.003435451 | 0.007241521 | 0.005688095 | 0.005217411 | 0.004390197 | 0.011136759 | 0.006659699  | 0.015448039 | 0.007484207 | 0.008614439 |
| 0.003225148 | 0.003865269 | 0.008538079 | 0.006206137 | 0.006270186 | 0.006121738 | 0.008481082 | 0.00837648   | 0.010229613 | 0.009301832 | 0.011873423 |
| 0.001935039 | 0.0031259   | 0.007660345 | 0.006452595 | 0.0031246   | 0.003804948 | 0.008740752 | 0.006885484  | 0.011066681 | 0.007552307 | 0.012572065 |
| 0.002509988 | 0.00270486  | 0.007686737 | 0.006931359 | 0.008379972 | 0.005752287 | 0.005484504 | 0.008727835  | 0.005053476 | 0.010104202 | 0.008256927 |
| 0.002197548 | 0.002730848 | 0.006323372 | 0.005112786 | 0.005354053 | 0.004915791 | 0.0064309   | 0.00767558   | 0.007445599 | 0.00794077  | 0.01392853  |
| 0.000992655 | 0.00126855  | 0.006773208 | 0.005953408 | 0.00563847  | 0.003360907 | 0.005189654 | 0.018056308  | 0.005273341 | 0.007269371 | 0.009663461 |
| 0.001577584 | 0.002499448 | 0.007920336 | 0.006347007 | 0.006305013 | 0.00478679  | 0.006528417 | 0.008369063  | 0.006213114 | 0.009374427 | 0.011688773 |
| 0.000787256 | 0.0016899   | 0.005625326 | 0.005973212 | 0.005037999 | 0.003282234 | 0.005858618 | 0.007259032  | 0.00598922  | 0.007262645 | 0.011599594 |
| 0.002357227 | 0.001880816 | 0.009808479 | 0.007568917 | 0.005491444 | 0.002136736 | 0.005412663 | 0.005023282  | 0.002813015 | 0.005995908 | 0.007328652 |
| 0.002434585 | 0.001784514 | 0.010416296 | 0.008088962 | 0.005676683 | 0.002183118 | 0.005635544 | 0.00435799   | 0.002801969 | 0.006474894 | 0.007410776 |
| 0.002608562 | 0.004104635 | 0.005729223 | 0.004558149 | 0.00769072  | 0.006317518 | 0.004843343 | 0.008506663  | 0.006933547 | 0.008444318 | 0.008315157 |
| 0.00766546  | 0.003866756 | 0.005843387 | 0.005014168 | 0.011256276 | 0.011631846 | 0.004250406 | 0.008148025  | 0.003614704 | 0.008025705 | 0.00610497  |
| 0.002788037 | 0.002587985 | 0.006981571 | 0.006635181 | 0.00853584  | 0.005551662 | 0.004776819 | 0.007646085  | 0.003955678 | 0.008973202 | 0.006543323 |
| 0.002894993 | 0.002501834 | 0.006151185 | 0.005786536 | 0.006578615 | 0.005704488 | 0.003979776 | 0.006248991  | 0.004176021 | 0.005853892 | 0.007850977 |
| 0.004247177 | 0.002780642 | 0.005428146 | 0.005670996 | 0.008270253 | 0.006426809 | 0.00429224  | 0.005626893  | 0.003366574 | 0.006826351 | 0.006789549 |
| 0.004571461 | 0.003499169 | 0.006069855 | 0.006622861 | 0.006552499 | 0.005725039 | 0.004960668 | 0.005823731  | 0.004062605 | 0.005236517 | 0.005637446 |
| 0.005317338 | 0.003653923 | 0.007659226 | 0.007562584 | 0.008002892 | 0.006764469 | 0.005807052 | 0.006264337  | 0.003942717 | 0.007015873 | 0.006438339 |
| 0.004063799 | 0.003236128 | 0.007490525 | 0.007096926 | 0.00838423  | 0.006553875 | 0.004953496 | 0.007045461  | 0.003901196 | 0.007824297 | 0.006454613 |
| 0.00602463  | 0.003171753 | 0.004172146 | 0.00380007  | 0.006493362 | 0.009372376 | 0.003674421 | 0.004650386  | 0.003446099 | 0.004136306 | 0.006214468 |
| 0.007966108 | 0.003198879 | 0.005192342 | 0.004192898 | 0.006454725 | 0.009313514 | 0.003463405 | 0.003945691  | 0.004349958 | 0.003772586 | 0.005361867 |
| 0.00453625  | 0.005791383 | 0.004717559 | 0.004177889 | 0.008848189 | 0.007798707 | 0.003578097 | 0.007529493  | 0.004751143 | 0.007627744 | 0.003284408 |
| 0.010423019 | 0.008898112 | 0.004914295 | 0.004120738 | 0.013959186 | 0.010137464 | 0.004018108 | 0.008917728  | 0.004065497 | 0.010132222 | 0.002962026 |
| 0.003277613 | 0.003350997 | 0.004713551 | 0.004203503 | 0.009715921 | 0.007611916 | 0.004309228 | 0.008948542  | 0.005496172 | 0.007228059 | 0.005262399 |
| 0.005097058 | 0.006068153 | 0.008370191 | 0.005334901 | 0.011538183 | 0.009294657 | 0.0050211   | 0.011030855  | 0.00645386  | 0.011201419 | 0.005704208 |
| 0.00871245  | 0.008155057 | 0.006470789 | 0.005656282 | 0.014480467 | 0.014751233 | 0.004762295 | 0.010505106  | 0.004126108 | 0.010434177 | 0.004630689 |
| 0.005122665 | 0.006032297 | 0.005937293 | 0.005086735 | 0.011235521 | 0.009277549 | 0.004171306 | 0.009117851  | 0.004991416 | 0.009119045 | 0.004296937 |
| 0.01288011  | 0.008715308 | 0.005593693 | 0.00286344  | 0.008371506 | 0.007686874 | 0.001924302 | 0.004725105  | 0.003813875 | 0.005226877 | 0.003417888 |
| 0.011760023 | 0.011862304 | 0.006985761 | 0.005558679 | 0.009992169 | 0.010037324 | 0.004575187 | 0.008679934  | 0.003586402 | 0.009668257 | 0.003086082 |
| 0.012101109 | 0.011368814 | 0.007373199 | 0.005711398 | 0.009575232 | 0.009965753 | 0.004492649 | 0.008466389  | 0.003520296 | 0.010081237 | 0.003193012 |
| 0.003439161 | 0.004350403 | 0.007753666 | 0.00667886  | 0.009887587 | 0.006201619 | 0.007235398 | 0.010446958  | 0.006612952 | 0.011014657 | 0.0095038   |
| 0.002141369 | 0.002883385 | 0.009168568 | 0.007007359 | 0.009355649 | 0.00580648  | 0.00721999  | 0.011323805  | 0.007233569 | 0.010762454 | 0.013117876 |
| 0.003409013 | 0.004880214 | 0.010211184 | 0.00708281  | 0.01152305  | 0.00732476  | 0.007286261 | 0.012106823  | 0.007776588 | 0.004375099 | 0.010055231 |
| 0.005115523 | 0.00349051  | 0.007177845 | 0.006261309 | 0.010516261 | 0.008439582 | 0.004486841 | 0.007976765  | 0.00438564  | 0.008031063 | 0.006547016 |
| 0.003419703 | 0.004010412 | 0.007403539 | 0.005805475 | 0.010780997 | 0.008464857 | 0.005184848 | 0.009872381  | 0.005965702 | 0.010824449 | 0.009424099 |
| 0.004210986 | 0.005448604 | 0.008613687 | 0.007013613 | 0.010957338 | 0.008541796 | 0.007545674 | 0.01102929   | 0.009659888 | 0.012930957 | 0.010034423 |
| 0.006060371 | 0.007811894 | 0.011655262 | 0.008921801 | 0.013190799 | 0.010402393 | 0.008190546 | 0.013256353  | 0.007848567 | 0.0136207   | 0.008333998 |
| 0.008508387 | 0.010458169 | 0.012639202 | 0.010079035 | 0.013660626 | 0.011781413 | 0.008997172 | 0.013607578  | 0.008705376 | 0.014351974 | 0.008292675 |
| 0.004558203 | 0.005788905 | 0.01109858  | 0.008790915 | 0.011737659 | 0.008618153 | 0.007430027 | 0.012229858  | 0.007305826 | 0.012840963 | 0.009169303 |
| 0.005446688 | 0.00636477  | 0.011094391 | 0.008464533 | 0.013424531 | 0.010269174 | 0.007240083 | 0.012833796  | 0.006767386 | 0.013668    | 0.007425707 |
| 0.008847235 | 0.001211458 | 0.012195891 | 0.008363389 | 0.011399393 | 0.011117924 | 0.007376024 | 0.0114925203 | 0.00778171  | 0.014319345 | 0.006271932 |
| 0.007264158 | 0.009751716 | 0.009600901 | 0.008432746 | 0.012474331 | 0.011795575 | 0.005851498 | 0.010891669  | 0.00678605  | 0.010899286 | 0.005075744 |
| 0.007000054 | 0.013101343 | 0.008443226 | 0.009422146 | 0.010492093 | 0.008733811 | 0.010038801 | 0.011217024  | 0.008022072 | 0.008363578 | 0.006322859 |
| 0.009755065 | 0.008854013 | 0.006843185 | 0.004813797 | 0.00776538  | 0.009336033 | 0.004930463 | 0.00711778   | 0.003692392 | 0.006591554 | 0.006179562 |
| 0.007916293 | 0.009553917 | 0.010460582 | 0.008547593 | 0.012361004 | 0.010529039 | 0.007068388 | 0.011483301  | 0.006875958 | 0.011906026 | 0.006699596 |
| 0.007828401 | 0.007132711 | 0.010383882 | 0.00906778  | 0.011539642 | 0.009809078 | 0.007266292 | 0.009661483  | 0.005895921 | 0.010214088 | 0.007250908 |
| 0.006057278 | 0.006169429 | 0.009999583 | 0.008190454 | 0.011583462 | 0.009538627 | 0.006342074 | 0.01050698   | 0.005885722 | 0.01139335  | 0.006731033 |
| 0.009336254 | 0.006794918 | 0.010419883 | 0.009557971 | 0.011411896 | 0.009546026 | 0.007851536 | 0.009131208  | 0.00567824  | 0.009489408 | 0.005771769 |
| 0.006258798 | 0.005272959 | 0.007523961 | 0.007119586 | 0.012606987 | 0.009229494 | 0.006569361 | 0.005663818  | 0.004811115 | 0.009473808 | 0.005111027 |
| 0.004370017 | 0.003568482 | 0.008383049 | 0.012815951 | 0.009678409 | 0.00660011  | 0.010403916 | 0.006345824  | 0.005778838 | 0.006734959 | 0.006759486 |
| 0.006026761 | 0.007287825 | 0.009461733 | 0.007672068 | 0.011964735 | 0.009306675 | 0.006341367 | 0.01210029   | 0.007011497 | 0.011882511 | 0.006787597 |
| 0.006230331 | 0.009443175 | 0.004494341 | 0.004775783 | 0.011324432 | 0.01104009  | 0.004274623 | 0.011215671  | 0.006839859 | 0.010928818 | 0.002984953 |
| 0.006198686 | 0.003597971 | 0.005263651 | 0.009736805 | 0.006835173 | 0.006957513 | 0.012115567 | 0.00683591   | 0.006020174 | 0.007713902 | 0.002594259 |
| 0.013858734 | 0.012753029 | 0.009894534 | 0.006979266 | 0.010601549 | 0.012183257 | 0.007757564 | 0.010140337  | 0.006575292 | 0.010031489 | 0.006735594 |
| 0.014762261 | 0.014227725 | 0.009094303 | 0.006051977 | 0.011017324 | 0.012977371 | 0.007065652 | 0.010216369  | 0.006434592 | 0.009833058 | 0.006305801 |
| 0.011022359 | 0.008537173 | 0.010080033 | 0.035785064 | 0.013473563 | 0.00892672  | 0.011878454 | 0.012233602  | 0.006180544 | 0.004941247 | 0.005091992 |
| 0.00983144  | 0.014851412 | 0.008892848 | 0.008252134 | 0.015825076 | 0.013865665 | 0.007939853 | 0.014200718  | 0.006839853 | 0.015369269 | 0.005999408 |
| 0.009771707 | 0.010325112 | 0.009249582 | 0.007993489 | 0.013917112 | 0.011237031 | 0.007236864 | 0.011090337  | 0.005433134 | 0.011561821 | 0.00501996  |
| 0.009800439 | 0.011090441 | 0.011652993 | 0.010268058 | 0.012067667 | 0.01056007  | 0.009091218 | 0.0109095    | 0.007752791 | 0.011848571 | 0.007248217 |
| 0.010476125 | 0.012754021 | 0.010955931 | 0.009704745 | 0.013684611 | 0.012083766 | 0.008828552 | 0.012423883  | 0.007607688 | 0.013073723 | 0.006453504 |
| 0.007804882 | 0.010911786 | 0.010985161 | 0.009514515 | 0.014367103 | 0.012176633 | 0.006172664 | 0.014003666  | 0.006324696 | 0.014500001 | 0.005512976 |
| 0.005941335 | 0.009572584 | 0.006957633 | 0.009947702 | 0.011054829 | 0.011706159 | 0.010227238 | 0.013682267  | 0.003950983 | 0.012491483 | 0.007699526 |
| 0.014136534 | 0.010114504 | 0.007157324 | 0.00405548  | 0.008366604 | 0.012525367 | 0.004377808 | 0.00780912   | 0.004270031 | 0.006571144 | 0.006255159 |
| 0.013055684 | 0.011129862 | 0.005585345 | 0.002503967 | 0.008185863 | 0.011217469 | 0.002664298 | 0.006516453  | 0.003954463 | 0.005471671 | 0.003595315 |
| 0.014161673 | 0.010707166 | 0.006068941 | 0.003634063 | 0.00846583  | 0.009407645 | 0.003744377 | 0.007343228  | 0.004474182 | 0.006273618 | 0.00391007  |
| 0.009047502 | 0.007741674 | 0.003533305 | 0.001711296 | 0.005948472 | 0.007976386 | 0.002106855 | 0.00497301   | 0.005176338 | 0.003776051 | 0.00311746  |
| 0.0065622   |             |             |             |             |             |             |              |             |             |             |

|             |             |             |             |             |             |             |             |             |             |             |
|-------------|-------------|-------------|-------------|-------------|-------------|-------------|-------------|-------------|-------------|-------------|
| 0.007759307 | 0.010689469 | 0.010284651 | 0.00809868  | 0.005287769 | 0.005883228 | 0.013632114 | 0.007385266 | 0.012703054 | 0.006367207 | 0.003678848 |
| 0.007104317 | 0.008737811 | 0.010290158 | 0.007468132 | 0.005458791 | 0.005682456 | 0.00994628  | 0.006098808 | 0.010217617 | 0.006292989 | 0.004193672 |
| 0.012275399 | 0.009433835 | 0.006604691 | 0.008975814 | 0.003056268 | 0.007693314 | 0.009777658 | 0.003713338 | 0.01874703  | 0.00281721  | 0.003899061 |
| 0.009438182 | 0.010106014 | 0.006984543 | 0.007917092 | 0.003263134 | 0.006526472 | 0.011859684 | 0.004205293 | 0.015734807 | 0.00425028  | 0.003149834 |
| 0.011382925 | 0.013328425 | 0.003510281 | 0.011350024 | 0.006217002 | 0.009478427 | 0.009326858 | 0.004174065 | 0.008403202 | 0.00277922  | 0.005303473 |
| 0.011579283 | 0.012616266 | 0.003775724 | 0.011562057 | 0.005347599 | 0.007827903 | 0.009581569 | 0.004401959 | 0.008817622 | 0.00219039  | 0.005026315 |
| 0.006399116 | 0.009958788 | 0.009015205 | 0.010461818 | 0.006032779 | 0.002518927 | 0.01787502  | 0.007468291 | 0.011502774 | 0.008399452 | 0.004697886 |
| 0.006180287 | 0.007356514 | 0.008721454 | 0.007789501 | 0.004692374 | 0.003517568 | 0.014675532 | 0.006400223 | 0.008111753 | 0.005888547 | 0.00446744  |
| 0.020367495 | 0.008792805 | 0.007625779 | 0.019115238 | 0.003290722 | 0.006289655 | 0.015252061 | 0.005202337 | 0.012271687 | 0.003661536 | 0.00431771  |
| 0.019939291 | 0.012055217 | 0.008285954 | 0.015228471 | 0.004822179 | 0.007646932 | 0.017385839 | 0.007108938 | 0.013118245 | 0.005133463 | 0.005846966 |
| 0.025457621 | 0.01096068  | 0.008826391 | 0.016291255 | 0.004501321 | 0.005896879 | 0.022832059 | 0.006757908 | 0.012099564 | 0.006099565 | 0.005359158 |
| 0.007803251 | 0.010999104 | 0.004894229 | 0.003476936 | 0.005882738 | 0.006785807 | 0.003615103 | 0.007027083 | 0.001974375 | 0.00242551  | 0.009962587 |
| 0.011327427 | 0.011304377 | 0.004114677 | 0.002853977 | 0.005018845 | 0.008109743 | 0.002255324 | 0.004291168 | 0.003141436 | 0.002381006 | 0.005945973 |
| 0.009615952 | 0.010359704 | 0.004897361 | 0.003214198 | 0.005979303 | 0.007137247 | 0.002590817 | 0.005966626 | 0.002718332 | 0.002396012 | 0.006329161 |
| 0.014955952 | 0.012336529 | 0.003716177 | 0.002987309 | 0.004763818 | 0.010403075 | 0.002121949 | 0.003592919 | 0.00353674  | 0.002591417 | 0.005801306 |
| 0.01450975  | 0.014708482 | 0.003434588 | 0.002748092 | 0.004612041 | 0.011442628 | 0.003102366 | 0.003549557 | 0.002737633 | 0.003336978 | 0.007194989 |
| 0.014080252 | 0.015157403 | 0.004072693 | 0.003505544 | 0.004346961 | 0.009741345 | 0.003481879 | 0.003763097 | 0.001905537 | 0.002379233 | 0.006185629 |
| 0.013763416 | 0.014408753 | 0.004522171 | 0.00332295  | 0.004416887 | 0.00781437  | 0.003592234 | 0.004166098 | 0.001626531 | 0.003075406 | 0.007636468 |
| 0.010731201 | 0.012888349 | 0.004179023 | 0.003225032 | 0.005199424 | 0.009264056 | 0.003005722 | 0.00389306  | 0.002289621 | 0.003252826 | 0.00768508  |
| 0.012422849 | 0.01463556  | 0.004252798 | 0.003673022 | 0.004988111 | 0.009357708 | 0.003211285 | 0.00408397  | 0.002055215 | 0.002669826 | 0.007822995 |
| 0.01381044  | 0.013889772 | 0.004308413 | 0.00337359  | 0.005389102 | 0.009541345 | 0.002901658 | 0.004677992 | 0.002392174 | 0.002955295 | 0.007428187 |
| 0.014553906 | 0.014537453 | 0.004054776 | 0.003603535 | 0.00491255  | 0.010468994 | 0.003182095 | 0.004176449 | 0.002533229 | 0.003176131 | 0.007588735 |
| 0.011886862 | 0.011997505 | 0.004381302 | 0.00310184  | 0.005948057 | 0.00831865  | 0.003418225 | 0.005879817 | 0.001837088 | 0.002992928 | 0.007208758 |
| 0.012891214 | 0.012804885 | 0.004012426 | 0.003450919 | 0.004573091 | 0.008946397 | 0.004151396 | 0.00393831  | 0.001724498 | 0.002820342 | 0.008054956 |
| 0.015714473 | 0.013672937 | 0.003508188 | 0.003099885 | 0.004915431 | 0.010700986 | 0.003909895 | 0.00413829  | 0.002008727 | 0.003039501 | 0.007872323 |
| 0.01444839  | 0.013084851 | 0.003732982 | 0.003075818 | 0.005302761 | 0.009985102 | 0.003643692 | 0.004742486 | 0.00191254  | 0.003114217 | 0.007630046 |
| 0.002934242 | 0.002908732 | 0.004243273 | 0.002948512 | 0.003233829 | 0.002649311 | 0.017297191 | 0.005564085 | 0.042454066 | 0.002519338 | 0.004566511 |
| 0.006450659 | 0.005493768 | 0.00533314  | 0.002605968 | 0.004353549 | 0.005558767 | 0.003393339 | 0.005567761 | 0.003393339 | 0.003825715 | 0.005604156 |
| 0.001451601 | 0.006923082 | 0.008810073 | 0.00545284  | 0.004329717 | 0.004677265 | 0.003334192 | 0.004913582 | 0.00868945  | 0.005384631 | 0.006794012 |
| 0.000955565 | 0.005525274 | 0.005619752 | 0.005423463 | 0.001329909 | 0.001707033 | 0.002805764 | 0.002683705 | 0.001839363 | 0.002122959 | 0.006863001 |
| 0.000701653 | 0.000836613 | 0.002737739 | 0.002708678 | 0.001596178 | 0.00165593  | 0.003982526 | 0.001616233 | 0.003692079 | 0.000979752 | 0.002129811 |
| 0.001757088 | 0.002595646 | 0.004770494 | 0.003996822 | 0.001384502 | 0.001477793 | 0.005490808 | 0.002292297 | 0.003833994 | 0.002554739 | 0.003705875 |
| 0.00160524  | 0.001919131 | 0.002330627 | 0.002150749 | 0.001377228 | 0.001438125 | 0.005128996 | 0.001505187 | 0.003665818 | 0.001756175 | 0.001059551 |
| 0.000861975 | 0.001107195 | 0.003595397 | 0.002943536 | 0.001509864 | 0.001043663 | 0.005734254 | 0.001882932 | 0.001910086 | 0.001641945 | 0.003019851 |
| 0.001638648 | 0.001839137 | 0.002587437 | 0.003460313 | 0.000744923 | 0.000768174 | 0.003366214 | 0.000862437 | 0.003590246 | 0.001201534 | 0.007818212 |
| 0.001194878 | 0.001928331 | 0.003219989 | 0.004946757 | 0.000768987 | 0.000796155 | 0.003859242 | 0.001279583 | 0.003053267 | 0.001768498 | 0.005771479 |
| 0.000986762 | 0.002201422 | 0.004052901 | 0.003986289 | 0.000841855 | 0.000921384 | 0.003170238 | 0.001257686 | 0.003201587 | 0.001620949 | 0.006753359 |
| 0.001410243 | 0.003142381 | 0.004224892 | 0.005865976 | 0.000638811 | 0.000763902 | 0.003916087 | 0.000999741 | 0.002353259 | 0.003135945 | 0.003239684 |
| 0.001534925 | 0.002145664 | 0.003671543 | 0.004332195 | 0.0004673   | 0.000581782 | 0.00295611  | 0.000636376 | 0.001801114 | 0.002140172 | 0.006578314 |
| 0.000658266 | 0.000525956 | 0.002146966 | 0.005632065 | 0.001129975 | 0.001093667 | 0.003946013 | 0.001727244 | 0.004845156 | 0.001799605 | 0.002723319 |
| 0.001107314 | 0.001569078 | 0.00244601  | 0.003204753 | 0.000578359 | 0.000472214 | 0.003224636 | 0.000905486 | 0.003088842 | 0.000914659 | 0.003881652 |
| 0.00053207  | 0.00110712  | 0.002534975 | 0.002497433 | 0.000619011 | 0.000518429 | 0.003338828 | 0.001295477 | 0.002590877 | 0.001360098 | 0.003779904 |
| 0.001086829 | 0.003127021 | 0.003844791 | 0.005904144 | 0.001244231 | 0.00079728  | 0.00557195  | 0.001657442 | 0.002464478 | 0.002902802 | 0.003857441 |
| 0.000633704 | 0.001778555 | 0.003087772 | 0.004397923 | 0.001038799 | 0.000702206 | 0.005393308 | 0.001886086 | 0.003073943 | 0.002854531 | 0.004056026 |
| 0.000654112 | 0.001733669 | 0.0035115   | 0.004253376 | 0.001089102 | 0.000739196 | 0.005957496 | 0.001942013 | 0.002990758 | 0.002678526 | 0.003839984 |
| 0.002034861 | 0.001267551 | 0.003633879 | 0.000985273 | 0.000701347 | 0.001894519 | 0.001964751 | 0.000649567 | 0.013145725 | 0.001016728 | 0.001264104 |
| 0.001619363 | 0.001154448 | 0.00274374  | 0.00096942  | 0.002663677 | 0.000538535 | 0.001747322 | 0.0004369   | 0.006361489 | 0.002276585 | 0.000863384 |
| 0.001375494 | 0.002313893 | 0.002952263 | 0.00153631  | 0.002451423 | 0.000141202 | 0.002984769 | 0.001768454 | 0.002241152 | 0.004500167 | 0.001146542 |
| 0.001395782 | 0.003673337 | 0.001385593 | 0.005242393 | 0.001057246 | 0.002868285 | 0.000798591 | 0.001435696 | 0.001435696 | 0.00201571  | 0.002252211 |
| 0.002403    | 0.002441846 | 0.002375713 | 0.002526253 | 0.001480368 | 0.001355082 | 0.003028046 | 0.001379137 | 0.003124172 | 0.002209443 | 0.003023353 |
| 0.001710044 | 0.003275681 | 0.001828946 | 0.004634791 | 0.000433808 | 0.001344842 | 0.003461679 | 0.001031577 | 0.001707245 | 0.004168856 | 0.004641034 |
| 0.002807913 | 0.001908355 | 0.003980402 | 0.002726548 | 0.000902865 | 0.002340971 | 0.003009064 | 0.003183602 | 0.002390676 | 0.001650564 | 0.001752239 |
| 0.001555656 | 0.004562607 | 0.001417363 | 0.004248914 | 0.000864442 | 0.006324172 | 0.001103405 | 0.002962488 | 0.002524656 | 0.000905337 | 0.002257946 |
| 0.002743396 | 0.002403837 | 0.001537393 | 0.001731054 | 0.000635066 | 0.002855175 | 0.002588618 | 0.000839381 | 0.005405587 | 0.002179532 | 0.002650757 |
| 0.003167893 | 0.002224412 | 0.001770481 | 0.001695901 | 0.000648489 | 0.0041867   | 0.00291832  | 0.001120084 | 0.005116291 | 0.00301243  | 0.00228339  |
| 0.002645577 | 0.002465149 | 0.001740793 | 0.00292708  | 0.000835814 | 0.003848348 | 0.002205916 | 0.001962841 | 0.003669535 | 0.001051739 | 0.003458519 |
| 0.003108439 | 0.002077835 | 0.002484631 | 0.006282427 | 0.001817977 | 0.005154391 | 0.003699438 | 0.001077698 | 0.00453343  | 0.00262135  | 0.002398482 |
| 0.003014474 | 0.000905    | 0.002028545 | 0.002631881 | 0.000835892 | 0.004608164 | 0.001525024 | 0.001778261 | 0.004364146 | 0.000792659 | 0.001138029 |
| 0.006894223 | 0.000707264 | 0.001968525 | 0.003307757 | 0.000663485 | 0.001719793 | 0.003618035 | 0.001245256 | 0.005836714 | 0.00100648  | 0.003010801 |
| 0.001718528 | 0.000797438 | 0.001087713 | 0.00211207  | 0.000661128 | 0.00230615  | 0.004315051 | 0.001405914 | 0.006506672 | 0.000559308 | 0.003959903 |
| 0.001520643 | 0.000924356 | 0.00271541  | 0.001247028 | 0.001710123 | 0.002775591 | 0.001469346 | 0.00115522  | 0.00616303  | 0.001959589 | 0.001566386 |
| 0.00212305  | 0.002054416 | 0.00193879  | 0.001973808 | 0.001749445 | 0.00165673  | 0.001456197 | 0.001671614 | 0.00282526  | 0.001932664 | 0.00360942  |
| 0.00249725  | 0.001279318 | 0.002696669 | 0.002297875 | 0.000967622 | 0.001705641 | 0.00251064  | 0.001468871 | 0.003073175 | 0.000992496 | 0.003082265 |
| 0.00122057  | 0.001467933 | 0.001816861 | 0.002118573 | 0.000611437 | 0.001395688 | 0.002780002 | 0.0014539   | 0.003428305 | 0.001978607 | 0.003517974 |
| 0.001349567 | 0.001637011 | 0.001961878 | 0.002433375 | 0.000787772 | 0.000988986 | 0.004033697 | 0.001453569 | 0.003382948 | 0.002230224 | 0.003000871 |
| 0.002598649 | 0.002098102 | 0.00348848  | 0.00284132  | 0.002294891 | 0.002243979 | 0.002631324 | 0.00227003  | 0.002642633 | 0.001195759 | 0.00326478  |
| 0.003832076 | 0.001266597 | 0.003602    | 0.001717659 | 0.002635669 | 0.001686378 | 0.002375233 | 0.002376215 | 0.005059529 | 0.001583184 | 0.005651444 |
| 0.003333465 | 0.001562264 | 0.002284045 | 0.001706333 | 0.000652195 | 0.00383678  | 0.002519171 | 0.001412313 | 0.003289642 | 0.002034334 | 0.004497286 |
| 0.003059607 | 0.001717765 | 0.002580489 | 0.002183393 | 0.007304517 | 0.002256143 | 0.001731509 | 0.00218455  |             |             |             |

|             |             |             |             |             |             |             |             |             |             |             |
|-------------|-------------|-------------|-------------|-------------|-------------|-------------|-------------|-------------|-------------|-------------|
| 0.003434269 | 0.00342432  | 0.004042265 | 0.003933695 | 0.004687457 | 0.004398639 | 0.009311547 | 0.005641831 | 0.003797096 | 0.004762385 | 0.004897329 |
| 0.005145614 | 0.004108926 | 0.006298034 | 0.004764083 | 0.006060496 | 0.009479215 | 0.010414091 | 0.008701995 | 0.000366005 | 0.008024153 | 0.011612909 |
| 0.00400431  | 0.00652421  | 0.012397014 | 0.008891555 | 0.008711474 | 0.004375582 | 0.01124405  | 0.008386724 | 0.009098503 | 0.01142417  | 0.01386243  |
| 0.005394617 | 0.009524856 | 0.011055794 | 0.010183446 | 0.008392531 | 0.00428926  | 0.013160778 | 0.007252309 | 0.011195086 | 0.012281504 | 0.013320573 |
| 0.004470971 | 0.001665234 | 0.007881898 | 0.011810853 | 0.003588408 | 0.006061162 | 0.005792426 | 0.005271597 | 0.005603132 | 0.001721397 | 0.004879078 |
| 0.006347148 | 0.004944249 | 0.008024147 | 0.008103964 | 0.003649747 | 0.002519663 | 0.007515926 | 0.004785876 | 0.006620849 | 0.002801849 | 0.004091088 |
| 0.004585634 | 0.00432298  | 0.004968711 | 0.013344537 | 0.002696867 | 0.003292018 | 0.007546789 | 0.005499009 | 0.005092643 | 0.005490828 | 0.004967296 |
| 0.004646262 | 0.003940419 | 0.005321401 | 0.012354107 | 0.002965588 | 0.003427991 | 0.007902873 | 0.005523613 | 0.006025518 | 0.006292448 | 0.0056179   |
| 0.002617053 | 0.003803391 | 0.006027925 | 0.013549086 | 0.006510908 | 0.002261214 | 0.008752056 | 0.003385546 | 0.008212855 | 0.005867614 | 0.005885086 |
| 0.004354888 | 0.003914432 | 0.005104462 | 0.006843667 | 0.004621012 | 0.003034692 | 0.003985644 | 0.01013654  | 0.005305457 | 0.004970149 | 0.006026419 |
| 0.005091715 | 0.003003485 | 0.004227253 | 0.007374939 | 0.003519824 | 0.003892434 | 0.010258355 | 0.009738189 | 0.007507417 | 0.00362064  | 0.003993634 |
| 0.004833435 | 0.008483817 | 0.010522431 | 0.004958946 | 0.00873359  | 0.004997623 | 0.002672918 | 0.002761686 | 0.006936233 | 0.005656942 | 0.004824651 |
| 0.007460291 | 0.004829586 | 0.007486902 | 0.004850126 | 0.003184657 | 0.006758939 | 0.00530184  | 0.008665836 | 0.012085377 | 0.005652381 | 0.009281291 |
| 0.006326636 | 0.008217333 | 0.006641552 | 0.010074617 | 0.007513336 | 0.006149341 | 0.014797546 | 0.006138337 | 0.010872642 | 0.016233214 | 0.010210023 |
| 0.006147513 | 0.004749705 | 0.005232771 | 0.009173654 | 0.003276112 | 0.002775448 | 0.011414945 | 0.003508379 | 0.008455962 | 0.00799462  | 0.006212586 |
| 0.002688336 | 0.004971158 | 0.007691581 | 0.004826569 | 0.010846176 | 0.005296753 | 0.002613872 | 0.006279864 | 0.005273629 | 0.008427552 | 0.006957638 |
| 0.003494465 | 0.003988973 | 0.005519741 | 0.00724663  | 0.003257632 | 0.006571877 | 0.006268156 | 0.005216706 | 0.008663953 | 0.004562617 | 0.009431482 |
| 0.002037897 | 0.005579836 | 0.006302418 | 0.004946918 | 0.005342989 | 0.005214978 | 0.004031626 | 0.007950572 | 0.008918208 | 0.006931231 | 0.014624444 |
| 0.002979369 | 0.004507044 | 0.006729217 | 0.004477515 | 0.004710763 | 0.005057215 | 0.004000383 | 0.007534584 | 0.007515317 | 0.006606547 | 0.014300864 |

| CPR_14      | CPR_15       | CPR_16      | CPR_17      | CPR_18      | CPR_19      | CPR_20      | CPR_21      | CPR_22      |
|-------------|--------------|-------------|-------------|-------------|-------------|-------------|-------------|-------------|
| 0.003746431 | 0.002277354  | 0.007806645 | 0.00869815  | 0.005081243 | 0.0076242   | 0.005878859 | 0.010338905 | 0.008714458 |
| 0.004152245 | 0.003527538  | 0.010148653 | 0.007448434 | 0.00517879  | 0.008582307 | 0.005877442 | 0.009275536 | 0.007143771 |
| 0.002857736 | 0.002150378  | 0.012053592 | 0.009619932 | 0.005193897 | 0.007984096 | 0.006207158 | 0.009884585 | 0.00931161  |
| 0.004521213 | 0.00362866   | 0.012249808 | 0.008760855 | 0.004989374 | 0.007883286 | 0.007662377 | 0.010240723 | 0.008320418 |
| 0.005397687 | 0.004044508  | 0.010855567 | 0.009108444 | 0.006194922 | 0.012165879 | 0.00650401  | 0.010617671 | 0.009689992 |
| 0.002557303 | 0.002032642  | 0.014102876 | 0.010014    | 0.004680902 | 0.014446927 | 0.005498153 | 0.00902098  | 0.010474137 |
| 0.005049687 | 0.003988401  | 0.004680416 | 0.007958716 | 0.006852781 | 0.005468734 | 0.006425322 | 0.009886805 | 0.007365799 |
| 0.00343832  | 0.002685852  | 0.008484754 | 0.009195897 | 0.005750241 | 0.014452523 | 0.005550456 | 0.012545128 | 0.009604493 |
| 0.003520252 | 0.002024092  | 0.007185602 | 0.009731309 | 0.006863892 | 0.006579365 | 0.005355245 | 0.020666097 | 0.007155977 |
| 0.003684242 | 0.003128014  | 0.008256715 | 0.009921526 | 0.006308871 | 0.007389748 | 0.005921894 | 0.013726834 | 0.009446956 |
| 0.002751861 | 0.001659996  | 0.008600042 | 0.008863474 | 0.005602364 | 0.007473288 | 0.005140983 | 0.012053638 | 0.008208139 |
| 0.006839257 | 0.003556837  | 0.005143657 | 0.014113428 | 0.009515734 | 0.006632672 | 0.002778856 | 0.008349554 | 0.009958635 |
| 0.006913016 | 0.003710336  | 0.0048891   | 0.015073704 | 0.006295394 | 0.007408625 | 0.002677423 | 0.008673658 | 0.01086802  |
| 0.005952522 | 0.004184269  | 0.003673394 | 0.007420935 | 0.005192052 | 0.00627149  | 0.006091782 | 0.00793264  | 0.007000721 |
| 0.008061328 | 0.006967505  | 0.002577786 | 0.008162812 | 0.009051734 | 0.002946991 | 0.00773145  | 0.008944636 | 0.005826707 |
| 0.005161525 | 0.004662565  | 0.003239064 | 0.007806974 | 0.008209657 | 0.00399094  | 0.005855267 | 0.009223996 | 0.006564154 |
| 0.003754048 | 0.004048939  | 0.003410043 | 0.010428954 | 0.007981602 | 0.005114205 | 0.005378562 | 0.009024094 | 0.005659789 |
| 0.004650777 | 0.005082373  | 0.002681575 | 0.009215388 | 0.008408419 | 0.003513047 | 0.006523321 | 0.008321049 | 0.005301388 |
| 0.00654943  | 0.005772161  | 0.003090728 | 0.006950554 | 0.011530767 | 0.004070266 | 0.006328815 | 0.011990878 | 0.005951279 |
| 0.006087862 | 0.006583644  | 0.003378972 | 0.00731426  | 0.009273722 | 0.004488756 | 0.005782264 | 0.008497049 | 0.006208977 |
| 0.005978698 | 0.005738637  | 0.003297688 | 0.007942307 | 0.008658934 | 0.004551605 | 0.005669147 | 0.008604386 | 0.006064898 |
| 0.003454273 | 0.004144672  | 0.002464887 | 0.008119123 | 0.008173351 | 0.005182796 | 0.007293262 | 0.009138904 | 0.00655337  |
| 0.004677487 | 0.004531059  | 0.002843956 | 0.009322592 | 0.009431852 | 0.002677583 | 0.00561717  | 0.008600939 | 0.00713089  |
| 0.007593489 | 0.006698639  | 0.002025733 | 0.005995465 | 0.004930961 | 0.001441814 | 0.005385974 | 0.006814271 | 0.004801708 |
| 0.011145409 | 0.009477186  | 0.002102267 | 0.003993856 | 0.008478789 | 0.001510607 | 0.007573492 | 0.007237359 | 0.005194702 |
| 0.006351412 | 0.0050667182 | 0.002257949 | 0.007891921 | 0.007250399 | 0.002764702 | 0.006365995 | 0.005774956 | 0.005897935 |
| 0.008812885 | 0.007521294  | 0.002170297 | 0.007587816 | 0.009052075 | 0.003174382 | 0.007659073 | 0.008601184 | 0.007060323 |
| 0.011228584 | 0.010693006  | 0.00222001  | 0.006243553 | 0.00921623  | 0.002181216 | 0.008488856 | 0.007520103 | 0.006414082 |
| 0.008694931 | 0.00774916   | 0.004792029 | 0.006043227 | 0.007439616 | 0.002287772 | 0.007087985 | 0.007496834 | 0.006041156 |
| 0.012254616 | 0.014443704  | 0.001296165 | 0.003479666 | 0.005259846 | 0.001766147 | 0.003514851 | 0.006296015 | 0.00557299  |
| 0.013292088 | 0.013012004  | 0.001813655 | 0.002237336 | 0.005479138 | 0.002074162 | 0.006273557 | 0.006472318 | 0.006220428 |
| 0.013507666 | 0.01314411   | 0.001757363 | 0.00208108  | 0.005130273 | 0.002120495 | 0.006268118 | 0.00521795  | 0.006321496 |
| 0.006216911 | 0.005200235  | 0.003818983 | 0.009551476 | 0.008608418 | 0.005932637 | 0.008261392 | 0.011362923 | 0.014316209 |
| 0.005695086 | 0.003680215  | 0.006575286 | 0.010480444 | 0.0082665   | 0.007408869 | 0.007621772 | 0.015207273 | 0.010542221 |
| 0.009191916 | 0.00565656   | 0.005463495 | 0.009202418 | 0.009391768 | 0.006541768 | 0.00938058  | 0.011466115 | 0.00957041  |
| 0.00718457  | 0.00678051   | 0.003522215 | 0.008563031 | 0.009329096 | 0.003648687 | 0.006334797 | 0.008884197 | 0.006393817 |
| 0.007385366 | 0.005615021  | 0.004369847 | 0.00828379  | 0.008228394 | 0.005765706 | 0.007278524 | 0.010582596 | 0.008106751 |
| 0.008304417 | 0.006302565  | 0.006888344 | 0.00794443  | 0.007472532 | 0.008457337 | 0.008222086 | 0.010536925 | 0.009298579 |
| 0.011260599 | 0.00903895   | 0.004562469 | 0.008115852 | 0.009751021 | 0.006041243 | 0.00975299  | 0.009629712 | 0.010692261 |
| 0.013276759 | 0.0114513    | 0.003731418 | 0.007461856 | 0.009928389 | 0.005309434 | 0.010355776 | 0.009448232 | 0.011424971 |
| 0.009183217 | 0.007120451  | 0.005132452 | 0.008466724 | 0.009187769 | 0.006050723 | 0.009005651 | 0.010138799 | 0.010097436 |
| 0.010654021 | 0.008366666  | 0.003646049 | 0.007234671 | 0.009496234 | 0.004696963 | 0.009312217 | 0.009380594 | 0.010120056 |
| 0.014072166 | 0.011585328  | 0.002788801 | 0.006802202 | 0.00960921  | 0.003632572 | 0.009315442 | 0.006260417 | 0.008905396 |
| 0.011009915 | 0.009935466  | 0.003133624 | 0.007056237 | 0.009618251 | 0.003394544 | 0.008530112 | 0.008720905 | 0.009183085 |
| 0.012503141 | 0.009043544  | 0.003233037 | 0.007765686 | 0.008476684 | 0.004041803 | 0.00891137  | 0.007250805 | 0.009092486 |
| 0.008945376 | 0.009913913  | 0.00262508  | 0.006954687 | 0.008389756 | 0.004738569 | 0.006388552 | 0.007654604 | 0.006857298 |
| 0.01209884  | 0.010768573  | 0.003352735 | 0.007430481 | 0.00943523  | 0.003990302 | 0.00889605  | 0.008622635 | 0.009315768 |
| 0.010512135 | 0.010408015  | 0.003558847 | 0.007769588 | 0.010817555 | 0.004743386 | 0.008006025 | 0.00895843  | 0.008322393 |
| 0.009921976 | 0.0087099    | 0.003273755 | 0.007472268 | 0.00954486  | 0.003962785 | 0.008206463 | 0.009162219 | 0.008651897 |
| 0.010611518 | 0.011284816  | 0.003942516 | 0.00780035  | 0.011517333 | 0.005154855 | 0.007726123 | 0.008978376 | 0.008479095 |
| 0.008936913 | 0.008815192  | 0.003841562 | 0.006406088 | 0.010951087 | 0.004157307 | 0.012038167 | 0.011973479 | 0.007660162 |
| 0.007126348 | 0.005116818  | 0.002747767 | 0.011014751 | 0.009610567 | 0.005336223 | 0.004558159 | 0.015110655 | 0.005971362 |
| 0.010717877 | 0.00855184   | 0.003846018 | 0.006272855 | 0.008381588 | 0.004281109 | 0.008693436 | 0.008383481 | 0.008679785 |
| 0.009475098 | 0.007673835  | 0.003506319 | 0.005887364 | 0.008541655 | 0.003248727 | 0.00763351  | 0.008246994 | 0.007800439 |
| 0.004573705 | 0.004746869  | 0.004254267 | 0.007126448 | 0.009675743 | 0.002925768 | 0.006214203 | 0.007844569 | 0.004812783 |
| 0.013421464 | 0.014109573  | 0.004415356 | 0.007244701 | 0.010179141 | 0.00513417  | 0.008375831 | 0.008956301 | 0.009183272 |
| 0.013902608 | 0.015311648  | 0.004642702 | 0.007712649 | 0.009971869 | 0.005055466 | 0.008500541 | 0.009246008 | 0.009361573 |
| 0.00350212  | 0.003656412  | 0.003520477 | 0.00926     | 0.011643488 | 0.004622998 | 0.008884195 | 0.012882541 | 0.007791267 |
| 0.01535832  | 0.013768762  | 0.003047611 | 0.006863055 | 0.009365998 | 0.003758948 | 0.011266893 | 0.00780837  | 0.007987246 |
| 0.012667215 | 0.012216671  | 0.003083067 | 0.006301009 | 0.010767001 | 0.003059306 | 0.009274301 | 0.008562872 | 0.00787954  |
| 0.012555031 | 0.01248649   | 0.004199785 | 0.007615809 | 0.010543884 | 0.004847227 | 0.009438271 | 0.008797443 | 0.009975875 |
| 0.013593368 | 0.013381662  | 0.003574677 | 0.006920521 | 0.009947648 | 0.003908431 | 0.010775878 | 0.008350605 | 0.009639098 |
| 0.01419427  | 0.010752682  | 0.002875245 | 0.005990754 | 0.006794766 | 0.004092139 | 0.010295558 | 0.007381765 | 0.007545081 |
| 0.011646589 | 0.010421337  | 0.003521844 | 0.009563912 | 0.012048423 | 0.003225697 | 0.008601116 | 0.011248768 | 0.003911251 |
| 0.01074269  | 0.01249346   | 0.003170331 | 0.006398846 | 0.008942342 | 0.004514797 | 0.006223616 | 0.009116997 | 0.0076025   |
| 0.010454402 | 0.012237487  | 0.002758134 | 0.006017673 | 0.008645228 | 0.002947119 | 0.004317127 | 0.006744248 | 0.007006829 |
| 0.011082371 | 0.012720791  | 0.003658019 | 0.004699125 | 0.007636576 | 0.002521964 | 0.004921054 | 0.006976816 | 0.006537439 |
| 0.007329032 | 0.009706943  | 0.003076536 | 0.006878666 | 0.00848174  | 0.002519598 | 0.002970616 | 0.008921911 | 0.006993323 |
| 0.007914094 | 0.01059052   | 0.006083066 | 0.009309677 | 0.014778697 | 0.004197552 | 0.004876737 | 0.011175405 | 0.011546639 |
| 0.006543754 | 0.00685716   | 0.002545307 | 0.007031482 | 0.008429331 | 0.001349481 | 0.005963014 | 0.007896343 | 0.006457623 |
| 0.012461149 | 0.010283417  | 0.002828326 | 0.004805167 | 0.008958081 | 0.001993511 | 0.008745552 | 0.006879666 | 0.00647559  |
| 0.003647333 | 0.012205981  | 0.002444213 | 0.003891433 | 0.00113529  | 0.003876594 | 0.01161221  | 0.007241981 | 0.006038097 |
| 0.001636217 | 0.005268064  | 0.003220697 | 0.004959498 | 0.00588415  | 0.003108651 | 0.005457833 | 0.002243156 | 0.00613449  |
| 0.003893322 | 0.006185037  | 0.008531031 | 0.003665413 | 0.000566572 | 0.005859961 | 0.00803421  | 0.003724849 | 0.006099598 |

|             |             |             |             |             |             |             |             |             |
|-------------|-------------|-------------|-------------|-------------|-------------|-------------|-------------|-------------|
| 0.005211019 | 0.007731802 | 0.00866065  | 0.004619245 | 0.002529796 | 0.00933336  | 0.012454333 | 0.00355526  | 0.007813501 |
| 0.005779837 | 0.007605707 | 0.008355154 | 0.00579592  | 0.002019714 | 0.008803147 | 0.008036736 | 0.004568281 | 0.008526477 |
| 0.007563497 | 0.006741819 | 0.00705859  | 0.004899887 | 0.001183152 | 0.005988668 | 0.012687158 | 0.003176288 | 0.007314652 |
| 0.005135373 | 0.007243353 | 0.007666809 | 0.005053564 | 0.001368557 | 0.005798223 | 0.009132466 | 0.004370425 | 0.007372778 |
| 0.003940178 | 0.005390674 | 0.002113395 | 0.004778083 | 0.002851956 | 0.009771531 | 0.007326426 | 0.004860403 | 0.00855189  |
| 0.004353409 | 0.005782979 | 0.001871792 | 0.004160626 | 0.002904467 | 0.008727183 | 0.007262554 | 0.005146163 | 0.009593004 |
| 0.006951616 | 0.006110423 | 0.010996391 | 0.00518601  | 0.006012542 | 0.008782358 | 0.012149981 | 0.002842201 | 0.004635501 |
| 0.00482207  | 0.005301241 | 0.008146773 | 0.003593614 | 0.00481372  | 0.008226845 | 0.009088513 | 0.002997152 | 0.005907718 |
| 0.01211623  | 0.009636158 | 0.00575784  | 0.008100006 | 0.007144765 | 0.005761968 | 0.018418551 | 0.002437558 | 0.006649423 |
| 0.01266568  | 0.011152645 | 0.011028125 | 0.009714689 | 0.006221192 | 0.010510934 | 0.016826988 | 0.005595582 | 0.006401556 |
| 0.011524103 | 0.010863769 | 0.010376479 | 0.008851823 | 0.00538636  | 0.009447295 | 0.018247526 | 0.004830899 | 0.005418767 |
| 0.006474979 | 0.005788498 | 0.004653091 | 0.003135917 | 0.002708467 | 0.015309481 | 0.007400503 | 0.002033025 | 0.00317868  |
| 0.006516192 | 0.006451338 | 0.003576101 | 0.005884995 | 0.003185504 | 0.006079605 | 0.00636649  | 0.00278833  | 0.003694178 |
| 0.007143645 | 0.007091194 | 0.004180454 | 0.005142498 | 0.003133099 | 0.008597241 | 0.006143853 | 0.002077787 | 0.004524389 |
| 0.006758413 | 0.007300356 | 0.003192196 | 0.005359533 | 0.003247875 | 0.004860457 | 0.007033021 | 0.003691183 | 0.003259979 |
| 0.007161807 | 0.006795444 | 0.00295054  | 0.005911466 | 0.003306356 | 0.005336803 | 0.008065292 | 0.004144954 | 0.002851383 |
| 0.004638861 | 0.006460343 | 0.003524433 | 0.004905226 | 0.003037662 | 0.006028184 | 0.008860739 | 0.002434599 | 0.003550931 |
| 0.005659398 | 0.005202777 | 0.003901931 | 0.005186393 | 0.003824893 | 0.006552805 | 0.008111555 | 0.002685109 | 0.004001221 |
| 0.005591745 | 0.005993757 | 0.003500348 | 0.005510927 | 0.004158861 | 0.006825359 | 0.008525846 | 0.002976613 | 0.003459893 |
| 0.00537017  | 0.005063262 | 0.004285294 | 0.004483061 | 0.00453578  | 0.007284466 | 0.008104857 | 0.002782482 | 0.003482267 |
| 0.006549651 | 0.006460343 | 0.003455736 | 0.004929083 | 0.003462504 | 0.006682112 | 0.007684145 | 0.002846319 | 0.003441015 |
| 0.005981825 | 0.005838825 | 0.003411908 | 0.004671417 | 0.003943495 | 0.006317189 | 0.007738611 | 0.00329414  | 0.003437213 |
| 0.00693467  | 0.006971296 | 0.003990821 | 0.004931877 | 0.003008767 | 0.008704199 | 0.008636517 | 0.002147933 | 0.003520916 |
| 0.005176587 | 0.004940968 | 0.003297542 | 0.004617005 | 0.003826858 | 0.006323322 | 0.008921948 | 0.002698915 | 0.003007775 |
| 0.005397653 | 0.005388504 | 0.003039284 | 0.004392854 | 0.003532693 | 0.005834841 | 0.008909459 | 0.002890432 | 0.002955774 |
| 0.006135921 | 0.006181221 | 0.003264928 | 0.004631368 | 0.003432947 | 0.006307476 | 0.008927753 | 0.002734795 | 0.003018289 |
| 0.004176701 | 0.004211378 | 0.005143729 | 0.005927762 | 0.005067609 | 0.004973993 | 0.001980105 | 0.005280988 | 0.004657113 |
| 0.003644707 | 0.006408739 | 0.006192542 | 0.004904041 | 0.002715627 | 0.005513728 | 0.005267166 | 0.005449938 | 0.00319327  |
| 0.005639977 | 0.008589856 | 0.007019133 | 0.004529822 | 0.00290186  | 0.009379236 | 0.00443841  | 0.00445143  | 0.002640195 |
| 0.002396244 | 0.001493505 | 0.009811761 | 0.001185179 | 0.00088966  | 0.010461519 | 0.00193568  | 0.00064123  | 0.002842975 |
| 0.001011589 | 0.000584845 | 0.009014472 | 0.002095123 | 0.004221038 | 0.003107241 | 0.001989661 | 0.002461252 | 0.004298253 |
| 0.000972803 | 0.001426067 | 0.00834296  | 0.002016787 | 0.002201108 | 0.006977335 | 0.002125163 | 0.001191057 | 0.003078648 |
| 0.001335763 | 0.001250156 | 0.00660317  | 0.002439199 | 0.003615641 | 0.003384297 | 0.001810999 | 0.001647397 | 0.003753702 |
| 0.001284044 | 0.001410868 | 0.009840163 | 0.002470087 | 0.002949321 | 0.005715439 | 0.001667814 | 0.001543256 | 0.002684371 |
| 0.00135048  | 0.002223527 | 0.010932179 | 0.007281817 | 0.002143618 | 0.005743092 | 0.001131476 | 0.002695308 | 0.003586634 |
| 0.001674096 | 0.0014127   | 0.010771562 | 0.00409015  | 0.001860764 | 0.005707615 | 0.001588788 | 0.001587804 | 0.002696589 |
| 0.001420323 | 0.001365262 | 0.011508235 | 0.003904647 | 0.002083455 | 0.006550096 | 0.001005872 | 0.001665488 | 0.00315226  |
| 0.001243228 | 0.001630144 | 0.012159996 | 0.003953422 | 0.001653903 | 0.00336054  | 0.001097682 | 0.0025091   | 0.002531514 |
| 0.001337183 | 0.007388495 | 0.007798344 | 0.004843841 | 0.001299593 | 0.001876842 | 0.000778138 | 0.001760523 | 0.001737286 |
| 0.001118375 | 0.001286437 | 0.00490499  | 0.003820121 | 0.005613338 | 0.00217784  | 0.001065268 | 0.00483199  | 0.00304844  |
| 0.00054836  | 0.000852632 | 0.008390783 | 0.003972173 | 0.002423279 | 0.004622272 | 0.000879505 | 0.001796442 | 0.002546704 |
| 0.001055955 | 0.000694607 | 0.011329872 | 0.001837317 | 0.001241045 | 0.00439458  | 0.001048357 | 0.001436403 | 0.002064014 |
| 0.001395905 | 0.001533338 | 0.009954276 | 0.002675887 | 0.00175346  | 0.007212909 | 0.00206793  | 0.0012984   | 0.002326907 |
| 0.000899139 | 0.000744546 | 0.0081241   | 0.001856859 | 0.002173893 | 0.004715926 | 0.00174473  | 0.001400397 | 0.001852202 |
| 0.000996883 | 0.000729558 | 0.008098537 | 0.002050824 | 0.001938204 | 0.00523795  | 0.001883381 | 0.001561888 | 0.002251211 |
| 0.000426522 | 0.001587585 | 0.007239035 | 0.001518388 | 0.001719431 | 0.002056076 | 0.000693594 | 0.002389136 | 0.005057407 |
| 0.000421277 | 0.001025498 | 0.005943689 | 0.003111136 | 0.002747602 | 0.005360493 | 0.002133541 | 0.002330208 | 0.006287568 |
| 0.000920906 | 0.000826555 | 0.003208906 | 0.002262249 | 0.002429477 | 0.001346043 | 0.003925481 | 0.002758898 | 0.00415434  |
| 0.002385205 | 0.001031659 | 0.005653752 | 0.002016396 | 0.004311907 | 0.002161746 | 0.001813159 | 0.003875483 | 0.003604373 |
| 0.001444936 | 0.001591929 | 0.004564802 | 0.002206894 | 0.003294141 | 0.001793685 | 0.002018411 | 0.002466097 | 0.004849275 |
| 0.005262042 | 0.001029761 | 0.006710807 | 0.006863319 | 0.001748467 | 0.001673137 | 0.003118743 | 0.003374037 | 0.000971051 |
| 0.002719424 | 0.00229665  | 0.003102542 | 0.006144985 | 0.006001295 | 0.002132409 | 0.001322698 | 0.001363671 | 0.001965693 |
| 0.00334203  | 0.001760605 | 0.005371976 | 0.004329841 | 0.002455032 | 0.007280397 | 0.002520533 | 0.001498345 | 0.001461497 |
| 0.000860833 | 0.001043496 | 0.004948829 | 0.00228491  | 0.001090152 | 0.001149198 | 0.001339434 | 0.001079458 | 0.003393149 |
| 0.001247857 | 0.001189068 | 0.005389729 | 0.00146976  | 0.0013217   | 0.000895497 | 0.001695606 | 0.000890211 | 0.002373301 |
| 0.002534545 | 0.001768711 | 0.004800636 | 0.001600326 | 0.022802163 | 0.003388225 | 0.001728998 | 0.001975754 | 0.002435228 |
| 0.002274341 | 0.001780333 | 0.005073289 | 0.000754995 | 0.003341291 | 0.003238019 | 0.00389548  | 0.002907923 | 0.003164089 |
| 0.001588533 | 0.00142785  | 0.001819426 | 0.001646605 | 0.003348781 | 0.002224713 | 0.001565541 | 0.003564937 | 0.003087871 |
| 0.000997323 | 0.001047377 | 0.003979196 | 0.003061693 | 0.002329498 | 0.007180027 | 0.000692563 | 0.004003742 | 0.003028758 |
| 0.001235847 | 0.000865431 | 0.005939609 | 0.003107042 | 0.001256563 | 0.004623192 | 0.000700023 | 0.006194341 | 0.00287367  |
| 0.001042047 | 0.001648162 | 0.000981327 | 0.003143529 | 0.007055248 | 0.001553961 | 0.001010831 | 0.0041921   | 0.012581225 |
| 0.003330179 | 0.003152229 | 0.002582588 | 0.002051806 | 0.002557083 | 0.002624255 | 0.00147979  | 0.020103116 | 0.002643379 |
| 0.001095924 | 0.000812713 | 0.008816321 | 0.000973526 | 0.00326098  | 0.002451091 | 0.00220626  | 0.00131236  | 0.00263466  |
| 0.001520038 | 0.0008987   | 0.013098204 | 0.001806055 | 0.001943958 | 0.001709964 | 0.001133879 | 0.001069847 | 0.001987138 |
| 0.00180211  | 0.00142283  | 0.010956268 | 0.001775574 | 0.001878286 | 0.001970749 | 0.001822112 | 0.000972768 | 0.001917546 |
| 0.002767402 | 0.002248481 | 0.005670372 | 0.002435742 | 0.001899019 | 0.002906004 | 0.002608725 | 0.000925267 | 0.001484812 |
| 0.001648782 | 0.003456517 | 0.002299979 | 0.000535836 | 0.003186205 | 0.00220631  | 0.001307706 | 0.003710974 | 0.001619038 |
| 0.000800648 | 0.00106198  | 0.003919121 | 0.002064834 | 0.003209916 | 0.001093035 | 0.004658095 | 0.002855127 | 0.001793971 |
| 0.001999668 | 0.002364182 | 0.003448461 | 0.001616407 | 0.00228586  | 0.002781337 | 0.002224331 | 0.002645854 | 0.002469631 |
| 0.003434959 | 0.003784625 | 0.006020016 | 0.00862143  | 0.007181053 | 0.001749134 | 0.001484699 | 0.002842039 | 0.000978637 |
| 0.000566936 | 0.003254053 | 0.003151131 | 0.000816372 | 0.001933176 | 0.002422026 | 0.002155113 | 0.000784547 | 0.005342918 |
| 0.00115895  | 0.002265811 | 0.004560175 | 0.00123247  | 0.001442092 | 0.003073883 | 0.001248704 | 0.001196869 | 0.004932899 |
| 0.002078975 | 0.00191036  | 0.003041072 | 0.002284248 | 0.00252415  | 0.002225461 | 0.000903653 | 0.002931164 | 0.002023056 |
| 0.001996196 | 0.00224608  | 0.002986041 | 0.002266811 | 0.001901219 | 0.002917522 | 0.000937749 | 0.002786858 | 0.001556297 |
| 0.001020171 | 0.002138141 | 0.002485539 | 0.001410847 | 0.002201388 | 0.001821493 | 0.001778264 | 0.001420293 | 0.005764531 |
| 0.000948969 | 0.001312261 | 0.006134294 | 0.001337858 | 0.002121271 | 0.003699981 | 0.002391365 | 0.00086556  | 0.004146629 |

|             |             |             |             |             |             |             |             |             |
|-------------|-------------|-------------|-------------|-------------|-------------|-------------|-------------|-------------|
| 0.006895942 | 0.004119208 | 0.013533455 | 0.003710474 | 0.007381782 | 0.004881825 | 0.007702958 | 0.004589903 | 0.004383328 |
| 0.012056497 | 0.00876013  | 0.016361062 | 0.008575831 | 0.002225494 | 0.01366989  | 0.007672826 | 0.009502671 | 0.016445666 |
| 0.010762712 | 0.010394902 | 0.014399689 | 0.00705541  | 0.012517321 | 0.019637882 | 0.013778141 | 0.009827439 | 0.01994742  |
| 0.008714015 | 0.008134171 | 0.016513117 | 0.008828467 | 0.013918311 | 0.0149127   | 0.007758123 | 0.006952347 | 0.012528987 |
| 0.005718876 | 0.003544238 | 0.007420661 | 0.0071841   | 0.008724611 | 0.012131456 | 0.004308498 | 0.006375878 | 0.005803849 |
| 0.002354932 | 0.004573053 | 0.007031798 | 0.006977074 | 0.006026099 | 0.006738428 | 0.003955297 | 0.005822888 | 0.005282943 |
| 0.004760868 | 0.003456034 | 0.010680487 | 0.008802748 | 0.007875069 | 0.006160562 | 0.003847128 | 0.004557054 | 0.004014    |
| 0.005513149 | 0.004069667 | 0.010435904 | 0.008159962 | 0.007850275 | 0.006395293 | 0.004509637 | 0.004288149 | 0.004941161 |
| 0.006534073 | 0.002874481 | 0.015452221 | 0.006749993 | 0.007622393 | 0.011530936 | 0.002253226 | 0.002469608 | 0.003781106 |
| 0.009918733 | 0.006991037 | 0.011188826 | 0.018351159 | 0.007353484 | 0.017992452 | 0.005351345 | 0.002212669 | 0.002604877 |
| 0.00471681  | 0.005182175 | 0.012483002 | 0.010493888 | 0.010630162 | 0.014158265 | 0.007410168 | 0.003082423 | 0.002966747 |
| 0.00999303  | 0.009740385 | 0.011722324 | 0.008834416 | 0.005890039 | 0.013465963 | 0.006373964 | 0.001825167 | 0.00798538  |
| 0.006496788 | 0.010574535 | 0.009917326 | 0.007840899 | 0.006829756 | 0.010500798 | 0.002389832 | 0.00802553  | 0.008969334 |
| 0.006356931 | 0.011704924 | 0.011525306 | 0.013399337 | 0.018037688 | 0.017903993 | 0.01322254  | 0.011934485 | 0.012284659 |
| 0.001837343 | 0.005724818 | 0.007991396 | 0.004360872 | 0.009500107 | 0.006013345 | 0.008742352 | 0.004580129 | 0.002708957 |
| 0.009522873 | 0.014656065 | 0.00438066  | 0.006439509 | 0.002463657 | 0.006553755 | 0.007775176 | 0.004805116 | 0.005352125 |
| 0.008289902 | 0.015728116 | 0.01127186  | 0.004632962 | 0.002260411 | 0.01698162  | 0.006758877 | 0.004703248 | 0.004031614 |
| 0.005547619 | 0.014272127 | 0.010367343 | 0.007876791 | 0.003284864 | 0.028677446 | 0.004914197 | 0.003304342 | 0.00450401  |
| 0.006037545 | 0.013837457 | 0.012666724 | 0.007733298 | 0.003715751 | 0.028401277 | 0.004645289 | 0.003086193 | 0.003858353 |

Table S40. The relative abundance and distribution of the key 169 lipid molecule in SP (n=30), SPR (n=30) groups.

|                       | SP_01     | SP_02     | SP_03     | SP_04     | SP_05     | SP_06     | SP_07     | SP_08     | SP_09     | SP_10     | SP_11     |
|-----------------------|-----------|-----------|-----------|-----------|-----------|-----------|-----------|-----------|-----------|-----------|-----------|
| PC(36:2e)             | 0.0034964 | 0.0015495 | 0.0032378 | 0.0041134 | 0.0037264 | 0.0026437 | 0.0029665 | 0.0016236 | 0.0082221 | 0.0042563 | 0.0037109 |
| PC(36:4e)             | 0.0062445 | 0.0010418 | 0.0050939 | 0.0046397 | 0.0028348 | 0.0072136 | 0.0073402 | 0.0040735 | 0.0093728 | 0.0031026 | 0.0034589 |
| ChE(20:5)             | 0.0037038 | 0.0049453 | 0.0013595 | 0.0019552 | 0.0035669 | 0.0046886 | 0.0054051 | 0.0068906 | 0.0031347 | 0.0018296 | 0.0062554 |
| ZyE(20:4)             | 0.0037699 | 0.0050095 | 0.0013664 | 0.0018137 | 0.0032923 | 0.0047322 | 0.0055635 | 0.006738  | 0.0027758 | 0.0018094 | 0.0062701 |
| OAHA(36:1)            | 0.0100737 | 0.0037392 | 0.0061168 | 0.0031724 | 0.0048222 | 0.0104884 | 0.0128459 | 0.0066267 | 0.0055962 | 0.0015394 | 0.0060148 |
| OAHA(38:4)            | 0.0097167 | 0.0036554 | 0.0052344 | 0.0032703 | 0.0049798 | 0.0103414 | 0.0108479 | 0.0068765 | 0.0062432 | 0.0020041 | 0.005627  |
| OAHA(36:3)            | 0.0098437 | 0.0058911 | 0.0044222 | 0.0032055 | 0.004482  | 0.0113914 | 0.0142925 | 0.0066018 | 0.0067894 | 0.0020282 | 0.0057236 |
| OAHA(38:6)            | 0.0089279 | 0.0056858 | 0.0039907 | 0.0033418 | 0.005078  | 0.0107203 | 0.0121972 | 0.0070976 | 0.0061542 | 0.0022845 | 0.0052826 |
| PC(32:2)(rep)         | 0.0265395 | 0.0049871 | 0.0018404 | 0.0061491 | 0.005663  | 0.0095048 | 0.0047941 | 0.0052629 | 0.006733  | 0.0027447 | 0.0076847 |
| SM(d36:4)             | 0.0051436 | 0.0104489 | 0.0010284 | 0.0080933 | 0.0116154 | 0.0092687 | 0.0069213 | 0.0047629 | 0.0055927 | 0.0030263 | 0.0072588 |
| SM(d38:5)             | 0.0056427 | 0.0084484 | 0.0003884 | 0.0033169 | 0.0113601 | 0.0060936 | 0.0040781 | 0.0031623 | 0.0079285 | 0.0019037 | 0.0044716 |
| PC(41:7p)             | 0.0059473 | 0.0032453 | 0.0126327 | 0.004648  | 0.0025255 | 0.0048924 | 0.0069513 | 0.0051111 | 0.0040034 | 0.0013931 | 0.0073303 |
| PC(38:2e)             | 0.0057078 | 0.0037196 | 0.025873  | 0.0053943 | 0.0048337 | 0.0094716 | 0.0054456 | 0.0046247 | 0.0023873 | 0.0013558 | 0.0035324 |
| PC(42:2e)             | 0.0054983 | 0.0054519 | 0.0189216 | 0.0034258 | 0.0038118 | 0.0033574 | 0.0126535 | 0.0054159 | 0.0028206 | 0.0012766 | 0.0073693 |
| ChE(22:1)             | 0.0034984 | 0.0041922 | 0.0129067 | 0.0076837 | 0.0040721 | 0.013876  | 0.0032155 | 0.0085037 | 0.0031185 | 0.0019342 | 0.007111  |
| PC(44:7)              | 0.004579  | 0.002447  | 0.0256035 | 0.0094465 | 0.0020828 | 0.0119347 | 0.005688  | 0.0056163 | 0.0028028 | 0.0016166 | 0.0042681 |
| ChE(20:5)(rep)        | 0.0031621 | 0.0126834 | 0.0181423 | 0.0097973 | 0.00475   | 0.0027677 | 0.0033777 | 0.0038432 | 0.0040004 | 0.0007797 | 0.0037732 |
| ChE(20:4)             | 0.0031643 | 0.0101577 | 0.005867  | 0.0042271 | 0.0074292 | 0.0043668 | 0.0032972 | 0.0024178 | 0.0045201 | 0.0007757 | 0.0024467 |
| ChE(22:6)             | 0.0056266 | 0.0074725 | 0.0058457 | 0.0058497 | 0.0058543 | 0.0053201 | 0.005872  | 0.0028303 | 0.0041185 | 0.0007956 | 0.0024499 |
| PC(16:0e/18:2)        | 0.0051714 | 0.0074171 | 0.0100353 | 0.0076507 | 0.0066559 | 0.0044841 | 0.0037476 | 0.002916  | 0.0110082 | 0.0031429 | 0.0025295 |
| ChE(18:2)(rep)(rep)   | 0.0058998 | 0.0085038 | 0.0042621 | 0.0055539 | 0.0130066 | 0.0075414 | 0.0033228 | 0.0024918 | 0.0060759 | 0.0014702 | 0.001991  |
| ChE(20:2)             | 0.0040521 | 0.0082024 | 0.0041455 | 0.0046357 | 0.0174679 | 0.0119671 | 0.0021953 | 0.0040043 | 0.0047066 | 0.0021613 | 0.0021108 |
| SiE(18:2)             | 0.0043737 | 0.0073948 | 0.0038114 | 0.0051888 | 0.0161511 | 0.0120061 | 0.0023928 | 0.0029814 | 0.0054044 | 0.0017041 | 0.0021772 |
| ChE(20:1)             | 0.0039362 | 0.0091641 | 0.0039803 | 0.0044092 | 0.0102665 | 0.0070746 | 0.0025863 | 0.0051809 | 0.0055534 | 0.0011917 | 0.0051013 |
| SiE(18:1)             | 0.0035304 | 0.0053103 | 0.0063498 | 0.0067401 | 0.0073014 | 0.0156935 | 0.0012233 | 0.0052072 | 0.0068504 | 0.0011317 | 0.0048322 |
| PC(34:2p)(rep)        | 0.0041987 | 0.0109296 | 0.0070151 | 0.0068995 | 0.0064543 | 0.0081794 | 0.0080214 | 0.0039661 | 0.0063456 | 0.0022444 | 0.0036828 |
| PC(34:3p)(rep)        | 0.0048792 | 0.0096694 | 0.0117294 | 0.0065893 | 0.0065985 | 0.0087834 | 0.005432  | 0.0024061 | 0.0057119 | 0.0014022 | 0.0016287 |
| PC(33:2p)             | 0.0059524 | 0.0070532 | 0.013079  | 0.0068483 | 0.0020149 | 0.0065935 | 0.0094207 | 0.002389  | 0.0061993 | 0.0017147 | 0.001554  |
| PC(36:4p)(rep)        | 0.0026265 | 0.0115301 | 0.04251   | 0.0102533 | 0.0035754 | 0.0036612 | 0.0049039 | 0.0021753 | 0.0052704 | 0.0012826 | 0.0021562 |
| PC(16:0e/20:5)        | 0.0031586 | 0.0144686 | 0.0469365 | 0.0100954 | 0.0033877 | 0.0035181 | 0.0045562 | 0.0023676 | 0.0061919 | 0.0013164 | 0.0017116 |
| PC(18:2p/18:2)        | 0.0029435 | 0.0151868 | 0.0483447 | 0.0106742 | 0.0031776 | 0.0035635 | 0.0045768 | 0.0021887 | 0.0055929 | 0.0013107 | 0.0015296 |
| PC(36:4p)             | 0.0026237 | 0.0072476 | 0.0147236 | 0.0072425 | 0.0025217 | 0.0043027 | 0.0031456 | 0.0016214 | 0.0067151 | 0.0016695 | 0.0010231 |
| PC(34:3p)             | 0.0067274 | 0.0106267 | 0.0209109 | 0.0063788 | 0.0025763 | 0.0042843 | 0.0060466 | 0.0022881 | 0.0043609 | 0.0012787 | 0.0013453 |
| PC(32:1p)             | 0.0046012 | 0.0110834 | 0.0128558 | 0.0078841 | 0.0028684 | 0.0050941 | 0.0050599 | 0.0023225 | 0.005525  | 0.0019759 | 0.0008784 |
| PC(33:1p)             | 0.0030717 | 0.011239  | 0.0118039 | 0.0075704 | 0.0033387 | 0.0050329 | 0.0057667 | 0.004166  | 0.0065168 | 0.0017664 | 0.0013254 |
| PC(36:5)(rep)(rep)(re | 0.0018909 | 0.0071327 | 0.007801  | 0.0060231 | 0.0043368 | 0.0028773 | 0.0035141 | 0.0065988 | 0.0046215 | 0.0041011 | 0.0056413 |
| PE(16:0p/20:5)        | 0.002116  | 0.0067074 | 0.0299911 | 0.0085368 | 0.0024851 | 0.0037266 | 0.004141  | 0.0041493 | 0.0048566 | 0.0023715 | 0.0040922 |
| PE(16:0p/20:5)(rep)   | 0.0020962 | 0.0061679 | 0.0269126 | 0.007611  | 0.0025589 | 0.0038777 | 0.0037401 | 0.0040798 | 0.0044206 | 0.0021161 | 0.0039141 |
| dMePE(34:1p)          | 0.0023478 | 0.0035254 | 0.0088754 | 0.0082682 | 0.0076954 | 0.0045016 | 0.0056986 | 0.0049731 | 0.0029925 | 0.0029776 | 0.0057094 |
| PE(18:0p/18:1)(rep)   | 0.0023693 | 0.003539  | 0.0087716 | 0.008183  | 0.0076844 | 0.0045229 | 0.0056474 | 0.0049694 | 0.0029929 | 0.0029248 | 0.0056948 |
| PE(18:2p/22:6)        | 0.0044634 | 0.0056124 | 0.0062619 | 0.0054987 | 0.0052191 | 0.0070384 | 0.0100939 | 0.0022443 | 0.0061572 | 0.0024231 | 0.0034761 |
| PE(16:0p/22:6)        | 0.0045081 | 0.0059925 | 0.0054577 | 0.0070875 | 0.0052918 | 0.0055766 | 0.0064921 | 0.0023674 | 0.0051285 | 0.0021156 | 0.0033053 |
| PE(16:0p/22:6)(rep)   | 0.0042624 | 0.0057768 | 0.0043825 | 0.0065915 | 0.0057019 | 0.0061577 | 0.0082591 | 0.0026366 | 0.0055223 | 0.0020188 | 0.0030084 |
| PE(18:1p/22:6)        | 0.0032878 | 0.0057545 | 0.0072488 | 0.0083724 | 0.0043719 | 0.0058491 | 0.0091823 | 0.0023265 | 0.0037748 | 0.0019496 | 0.0026755 |
| PE(18:1p/22:6)(rep)   | 0.003243  | 0.0056418 | 0.0061542 | 0.0075327 | 0.0052178 | 0.0071269 | 0.006196  | 0.0025586 | 0.0041719 | 0.0020209 | 0.0027736 |
| SM(d32:0)(rep)        | 0.006211  | 0.0026081 | 0.0040871 | 0.0050263 | 0.0049253 | 0.0041424 | 0.0023219 | 0.0042569 | 0.0041602 | 0.0019297 | 0.0041993 |
| SM(d33:0)             | 0.0035682 | 0.0037126 | 0.0033525 | 0.0093615 | 0.0106558 | 0.0045339 | 0.0032297 | 0.0068955 | 0.0055695 | 0.0022379 | 0.0054553 |
| SM(d34:0)             | 0.0047079 | 0.0033814 | 0.004219  | 0.0047197 | 0.0079477 | 0.0067568 | 0.0040258 | 0.0072553 | 0.0086543 | 0.0011097 | 0.006076  |
| SM(d34:0)(rep)        | 0.0049359 | 0.0034051 | 0.0040895 | 0.00486   | 0.0083158 | 0.006784  | 0.0039872 | 0.0065735 | 0.0086866 | 0.0011452 | 0.0065429 |
| PC(40:1)(rep)         | 0.0109167 | 0.0022552 | 0.0106221 | 0.0046286 | 0.0049687 | 0.0058043 | 0.0085322 | 0.0088327 | 0.0023637 | 0.0015884 | 0.0102503 |
| SM(d36:0)             | 0.0080102 | 0.0043491 | 0.002849  | 0.0035469 | 0.0088119 | 0.0040468 | 0.0065703 | 0.006788  | 0.0034078 | 0.0011906 | 0.0084756 |
| SM(d36:1)(rep)        | 0.006519  | 0.0036935 | 0.0030682 | 0.0052762 | 0.0090995 | 0.0046581 | 0.0059559 | 0.0060568 | 0.0040618 | 0.001126  | 0.0072651 |
| Cer(d18:0/24:1)       | 0.0101895 | 0.0036216 | 0.007697  | 0.0044249 | 0.0052539 | 0.0056997 | 0.0080813 | 0.0098334 | 0.002369  | 0.001848  | 0.0110077 |
| Cer(d20:0/24:1)       | 0.0098709 | 0.0049995 | 0.0079654 | 0.0040964 | 0.0051152 | 0.0062659 | 0.0075994 | 0.0074226 | 0.0023688 | 0.0014511 | 0.0096356 |
| Cer(d20:1/24:1)       | 0.0043967 | 0.003926  | 0.017468  | 0.0050511 | 0.0059664 | 0.0025178 | 0.0108434 | 0.0132015 | 0.0029685 | 0.0013937 | 0.015533  |
| SM(d43:2)             | 0.0031991 | 0.0070789 | 0.0043475 | 0.0106494 | 0.0068465 | 0.0036215 | 0.0110971 | 0.0050757 | 0.003286  | 0.0010504 | 0.0053246 |

|                         |           |           |           |           |           |           |           |           |           |           |           |
|-------------------------|-----------|-----------|-----------|-----------|-----------|-----------|-----------|-----------|-----------|-----------|-----------|
| SM(d43:2)(rep)          | 0.003331  | 0.0071639 | 0.0046621 | 0.0108611 | 0.0065322 | 0.0037284 | 0.0109532 | 0.0054009 | 0.0012768 | 0.0012871 | 0.0052747 |
| SM(d44:2)               | 0.0054038 | 0.0060403 | 0.0047406 | 0.004247  | 0.0079554 | 0.003779  | 0.0074707 | 0.0069024 | 0.0020177 | 0.0008617 | 0.0079798 |
| SM(d44:2)(rep)          | 0.0043532 | 0.0054217 | 0.0054925 | 0.0052921 | 0.0075589 | 0.0039435 | 0.0081993 | 0.0097538 | 0.0018085 | 0.0012742 | 0.0107581 |
| PC(18:0e/16:0)          | 0.0051425 | 0.005731  | 0.0057187 | 0.0033633 | 0.0061216 | 0.002686  | 0.0038761 | 0.0046808 | 0.0079624 | 0.0017583 | 0.0042643 |
| PC(34:0e)               | 0.0053356 | 0.006082  | 0.0043111 | 0.0028683 | 0.0071379 | 0.00275   | 0.0034643 | 0.0047659 | 0.007308  | 0.0018785 | 0.0044306 |
| PC(36:1e)               | 0.0059656 | 0.0060023 | 0.0097998 | 0.0037243 | 0.0058805 | 0.0039009 | 0.0065814 | 0.0043988 | 0.0038253 | 0.0014462 | 0.0053155 |
| PC(16:0e/16:0)          | 0.0054867 | 0.0089945 | 0.004342  | 0.0040135 | 0.0064338 | 0.0043691 | 0.0055668 | 0.0038732 | 0.0075938 | 0.0019842 | 0.0037518 |
| PC(32:0e)               | 0.0065117 | 0.0087126 | 0.0036973 | 0.004     | 0.0068641 | 0.0042266 | 0.0048469 | 0.0041109 | 0.0073292 | 0.0018976 | 0.0037604 |
| PC(16:0e/18:1)          | 0.0047776 | 0.0074244 | 0.0072243 | 0.0048409 | 0.0068294 | 0.0039726 | 0.0049526 | 0.0045995 | 0.0092003 | 0.0016418 | 0.0043032 |
| PC(34:1e)               | 0.004431  | 0.0067955 | 0.0055694 | 0.0044792 | 0.0070357 | 0.0037868 | 0.0046773 | 0.0046706 | 0.0084046 | 0.0014262 | 0.0042407 |
| SM(d40:3)               | 0.005531  | 0.0040842 | 0.0055228 | 0.0082426 | 0.008659  | 0.0056346 | 0.0072585 | 0.005505  | 0.0066598 | 0.0013097 | 0.0036891 |
| SM(d42:3)               | 0.0047343 | 0.0047318 | 0.0029824 | 0.0059601 | 0.0075794 | 0.0043871 | 0.0092684 | 0.0080115 | 0.005348  | 0.0007996 | 0.0079184 |
| SM(d44:3)(rep)          | 0.0050174 | 0.00649   | 0.0036014 | 0.0050031 | 0.0095249 | 0.0025965 | 0.0063099 | 0.0066587 | 0.0084748 | 0.0009555 | 0.0074984 |
| PC(18:0p/18:1)          | 0.0043409 | 0.0049674 | 0.0077152 | 0.0046033 | 0.0039803 | 0.0044684 | 0.0056193 | 0.003245  | 0.0079694 | 0.0018678 | 0.0029382 |
| GM3(d42:3)              | 0.0031804 | 0.0044028 | 0.0046218 | 0.0035032 | 0.0063957 | 0.0027978 | 0.0080505 | 0.0132455 | 0.0072532 | 0.0010779 | 0.0147305 |
| GM3(d34:1)              | 0.0027709 | 0.0038132 | 0.0026757 | 0.0032997 | 0.0051461 | 0.0029259 | 0.0052686 | 0.0107332 | 0.0103421 | 0.0015562 | 0.0113633 |
| GM3(d34:1)(rep)         | 0.002793  | 0.0035666 | 0.0021958 | 0.0032576 | 0.004895  | 0.0029024 | 0.0051548 | 0.0105346 | 0.0096631 | 0.0016876 | 0.0125924 |
| PC(16:0e/14:0)          | 0.0059661 | 0.0099509 | 0.0053521 | 0.0055041 | 0.0042545 | 0.0044041 | 0.0042681 | 0.0024454 | 0.0035357 | 0.0012296 | 0.0021197 |
| PC(30:0e)               | 0.0061947 | 0.0084401 | 0.0050431 | 0.0054069 | 0.0037514 | 0.0037791 | 0.0050494 | 0.0027403 | 0.0039183 | 0.0014096 | 0.0018007 |
| PC(40:6p)(rep)(rep)(rc) | 0.003954  | 0.0066246 | 0.0032015 | 0.0100867 | 0.0040318 | 0.0048088 | 0.0037804 | 0.0034487 | 0.0047203 | 0.0010735 | 0.0023945 |
| PC(16:0e/22:6)          | 0.0054568 | 0.0072317 | 0.0068529 | 0.0074665 | 0.0027151 | 0.003709  | 0.0044918 | 0.0028899 | 0.0064501 | 0.0017495 | 0.0025606 |
| PC(38:6e)(rep)          | 0.0057003 | 0.0067504 | 0.0068565 | 0.0072743 | 0.0022141 | 0.0038004 | 0.0044986 | 0.0031482 | 0.0061845 | 0.0016887 | 0.0028264 |
| PC(18:0p/22:6)          | 0.0048712 | 0.0060433 | 0.0082859 | 0.0079092 | 0.0025853 | 0.004712  | 0.0059231 | 0.0032715 | 0.0049135 | 0.0023698 | 0.0033755 |
| PC(40:6p)(rep)          | 0.005104  | 0.0054041 | 0.007763  | 0.0069478 | 0.0021272 | 0.0044293 | 0.0059295 | 0.0033053 | 0.0045528 | 0.0022191 | 0.0035287 |
| SM(d38:4)(rep)          | 0.0112675 | 0.0048977 | 0.0023337 | 0.0034689 | 0.0119507 | 0.0051158 | 0.0055806 | 0.0108872 | 0.0073901 | 0.0013482 | 0.0046901 |
| SM(d40:5)               | 0.0051765 | 0.0049315 | 0.0018918 | 0.0028855 | 0.0067674 | 0.0041484 | 0.0049896 | 0.0033411 | 0.0077747 | 0.00106   | 0.0043093 |
| SM(d42:6)(rep)          | 0.0035097 | 0.0089556 | 0.001     | 0.0032702 | 0.0087114 | 0.0047715 | 0.0068766 | 0.0050048 | 0.0056322 | 0.0006271 | 0.005629  |
| SM(d42:7)               | 0.0031499 | 0.0086206 | 0.0010193 | 0.0033753 | 0.007707  | 0.0052498 | 0.0058037 | 0.0040831 | 0.0057307 | 0.0004516 | 0.0050723 |
| SM(d35:1)(rep)(rep)     | 0.0047323 | 0.006308  | 0.0025688 | 0.0067224 | 0.0100417 | 0.003548  | 0.0084857 | 0.0078585 | 0.0027587 | 0.0007726 | 0.007832  |
| SM(d38:3)               | 0.0057694 | 0.0044572 | 0.0016946 | 0.0068522 | 0.009428  | 0.004168  | 0.0077312 | 0.0054868 | 0.0045911 | 0.0014381 | 0.0054912 |
| SM(d38:3)(rep)          | 0.0061008 | 0.0027831 | 0.0017748 | 0.0054633 | 0.0109202 | 0.0038005 | 0.0055264 | 0.0053257 | 0.0065312 | 0.0013843 | 0.0053504 |
| SM(d38:4)               | 0.0048902 | 0.0055128 | 0.0021155 | 0.0047562 | 0.010689  | 0.0040868 | 0.0089132 | 0.0047415 | 0.0085662 | 0.0014935 | 0.0048119 |
| SM(d36:2)               | 0.0060445 | 0.0062748 | 0.0022958 | 0.004735  | 0.0099548 | 0.0024954 | 0.0083033 | 0.008585  | 0.0036931 | 0.0006652 | 0.0079785 |
| SM(d37:2)               | 0.0048272 | 0.0071079 | 0.0022746 | 0.0064104 | 0.0083702 | 0.0030263 | 0.0109512 | 0.0053076 | 0.0045896 | 0.0005217 | 0.005078  |
| SM(d37:2)(rep)          | 0.0040668 | 0.0068022 | 0.0026197 | 0.0063489 | 0.0081216 | 0.0029612 | 0.0104973 | 0.0055437 | 0.0051327 | 0.0006125 | 0.0044049 |
| SM(d37:1)               | 0.0044911 | 0.0057434 | 0.0018573 | 0.0089523 | 0.0082077 | 0.0030809 | 0.0083471 | 0.0043264 | 0.0029864 | 0.0007674 | 0.0034329 |
| SM(d41:3)(rep)          | 0.0038442 | 0.0063308 | 0.0004773 | 0.0091519 | 0.0095242 | 0.0036423 | 0.0069445 | 0.0043278 | 0.0061859 | 0.0008012 | 0.0042474 |
| SM(d40:4)               | 0.0042794 | 0.0061785 | 0.0019231 | 0.0039915 | 0.0151407 | 0.0030243 | 0.0053764 | 0.0041334 | 0.0134071 | 0.0009294 | 0.0043326 |
| SM(d43:3)(rep)          | 0.0038797 | 0.0089757 | 0.0012529 | 0.0075355 | 0.0101044 | 0.0020489 | 0.0059036 | 0.0052586 | 0.0069658 | 0.000841  | 0.0062301 |
| Cer(d18:1/18:0)         | 0.0052248 | 0.0017399 | 0.0015017 | 0.0025897 | 0.0047348 | 0.0020442 | 0.0060934 | 0.0168612 | 0.002143  | 0.0022743 | 0.0149489 |
| PE(16:0/18:3)           | 0.0039378 | 0.0029957 | 0.0011965 | 0.0045366 | 0.0035791 | 0.0024994 | 0.0026395 | 0.0114436 | 0.0060662 | 0.0072468 | 0.0090186 |
| PC(16:0/18:3)(rep)      | 0.0071663 | 0.016444  | 0.0008515 | 0.003287  | 0.0039316 | 0.0140619 | 0.0092188 | 0.0037742 | 0.0042684 | 0.0035604 | 0.0040361 |
| PC(34:3)(rep)(rep)(rc)  | 0.0086394 | 0.0149417 | 0.0010864 | 0.0031782 | 0.0027365 | 0.0155258 | 0.0056878 | 0.0043601 | 0.0044164 | 0.0038811 | 0.0056011 |
| PC(36:6)(rep)(rep)(rc)  | 0.0194836 | 0.0097782 | 0.0010103 | 0.0027629 | 0.0032349 | 0.011532  | 0.0105725 | 0.0027324 | 0.0036886 | 0.0066368 | 0.0033923 |
| PC(34:4)                | 0.0049811 | 0.00501   | 0.0013763 | 0.0027594 | 0.0025736 | 0.0046742 | 0.0090501 | 0.0026457 | 0.0058658 | 0.0066714 | 0.0053935 |
| PC(36:5)(rep)           | 0.0044705 | 0.0076279 | 0.0025971 | 0.0035289 | 0.0026528 | 0.0087648 | 0.0069625 | 0.0026085 | 0.0038802 | 0.0147301 | 0.003252  |
| PC(33:3)                | 0.0093897 | 0.0042797 | 0.0020125 | 0.0051016 | 0.0030852 | 0.0048607 | 0.0040575 | 0.0038777 | 0.0041161 | 0.0075248 | 0.0048427 |
| PC(14:0/18:3)           | 0.0096249 | 0.0053077 | 0.0014607 | 0.0023799 | 0.0033336 | 0.008123  | 0.0044904 | 0.0021264 | 0.0046009 | 0.0095517 | 0.0036551 |
| PC(32:3)                | 0.0094404 | 0.004998  | 0.0017519 | 0.0020043 | 0.0034005 | 0.0041161 | 0.0040528 | 0.0022192 | 0.0038666 | 0.0081133 | 0.0040227 |
| PC(16:0/18:3)           | 0.0097569 | 0.0136498 | 0.0021275 | 0.0038266 | 0.0026254 | 0.0140436 | 0.0131898 | 0.0035483 | 0.004193  | 0.0041569 | 0.0044181 |
| PC(34:3)(rep)(rep)      | 0.0102723 | 0.0171882 | 0.0021695 | 0.0033742 | 0.0003791 | 0.0165587 | 0.0044986 | 0.0036581 | 0.0052661 | 0.0042601 | 0.0060713 |
| TG(16:0/18:1/21:0)      | 0.0018509 | 0.0009033 | 0.0012555 | 0.0017121 | 0.0014743 | 0.0012003 | 0.0014682 | 0.00327   | 0.001725  | 0.0048426 | 0.0028459 |
| TG(18:0/18:0/18:1)      | 0.0021847 | 0.000847  | 0.0010733 | 0.0019817 | 0.0013962 | 0.0011451 | 0.0010407 | 0.0038225 | 0.0015024 | 0.00413   | 0.003357  |
| TG(18:0/18:1/21:0)      | 0.0023386 | 0.000675  | 0.0009853 | 0.0019242 | 0.0014575 | 0.0009785 | 0.0012321 | 0.0039312 | 0.0016034 | 0.0037076 | 0.0037018 |
| TG(55:1)                | 0.0031583 | 0.0008895 | 0.0011319 | 0.0026509 | 0.0019374 | 0.0013972 | 0.0020388 | 0.0036755 | 0.0018282 | 0.003905  | 0.00292   |
| TG(18:0/16:0/18:1)      | 0.0030632 | 0.0007919 | 0.0009012 | 0.0018046 | 0.0018909 | 0.0011711 | 0.0014446 | 0.0048871 | 0.0015638 | 0.0037422 | 0.0044621 |
| TG(18:0/17:0/18:1)      | 0.0025935 | 0.0009862 | 0.0010474 | 0.0020504 | 0.0018522 | 0.001266  | 0.0013759 | 0.0046809 | 0.0021111 | 0.0031942 | 0.0036947 |
| TG(16:0/14:0/18:1)      | 0.0037137 | 0.0012202 | 0.000907  | 0.0015324 | 0.0021482 | 0.0015695 | 0.0013    | 0.0028144 | 0.0023783 | 0.0033618 | 0.0026864 |

|                      |           |           |           |           |           |           |           |           |           |           |           |
|----------------------|-----------|-----------|-----------|-----------|-----------|-----------|-----------|-----------|-----------|-----------|-----------|
| TG(16:0/8:0/18:1)    | 0.0025705 | 0.0014858 | 0.0008196 | 0.0018316 | 0.0013303 | 0.0017714 | 0.0017265 | 0.0025965 | 0.0022108 | 0.0038081 | 0.0020672 |
| TG(44:1)             | 0.002633  | 0.0013715 | 0.0007724 | 0.0017072 | 0.0016334 | 0.0019324 | 0.0018628 | 0.0026412 | 0.0022616 | 0.0036377 | 0.0019059 |
| TG(15:1/16:0/18:2)   | 0.0040667 | 0.001599  | 0.0005856 | 0.0023695 | 0.0025789 | 0.002548  | 0.0019183 | 0.0026032 | 0.0012231 | 0.0044186 | 0.0028047 |
| TG(18:0/12:0/18:2)   | 0.003275  | 0.0013062 | 0.0004553 | 0.0017328 | 0.0022146 | 0.0028569 | 0.0015571 | 0.0027915 | 0.0022733 | 0.0036999 | 0.0025072 |
| TG(14:0/14:0/18:2)   | 0.0030182 | 0.0013856 | 0.0006301 | 0.0016618 | 0.0017607 | 0.0022876 | 0.0016738 | 0.0023549 | 0.0023755 | 0.004455  | 0.0021274 |
| TG(16:0/14:0/18:2)   | 0.0037303 | 0.001279  | 0.0006161 | 0.0016548 | 0.0020602 | 0.0020022 | 0.0014292 | 0.0025399 | 0.0022113 | 0.0039737 | 0.0024723 |
| TG(18:1/12:0/18:2)   | 0.0027782 | 0.0013408 | 0.0005041 | 0.0012222 | 0.0018877 | 0.0030225 | 0.0012863 | 0.0026465 | 0.0022038 | 0.0046575 | 0.0016739 |
| TG(14:0/14:0/18:3)   | 0.0030604 | 0.001599  | 0.0005505 | 0.0018179 | 0.001803  | 0.0026268 | 0.0019481 | 0.0024047 | 0.0019238 | 0.0048408 | 0.0022796 |
| TG(16:0/14:0/18:3)   | 0.0032709 | 0.0014712 | 0.0004289 | 0.0016781 | 0.0019306 | 0.0027756 | 0.0019154 | 0.0023086 | 0.0022501 | 0.0044965 | 0.0022626 |
| TG(16:1/14:0/18:3)   | 0.0028056 | 0.0016173 | 0.0003726 | 0.0058169 | 0.0019884 | 0.0040645 | 0.0019492 | 0.001695  | 0.0023459 | 0.0034161 | 0.0024678 |
| TG(14:0/18:2/18:3)   | 0.0031603 | 0.0023694 | 0.000376  | 0.0022335 | 0.0026546 | 0.0036256 | 0.0023502 | 0.0025612 | 0.00196   | 0.0057656 | 0.0031909 |
| TG(16:1/16:1/18:2)   | 0.0040429 | 0.0020921 | 0.000263  | 0.0019684 | 0.0032721 | 0.0038411 | 0.0019939 | 0.002707  | 0.0019487 | 0.0048879 | 0.0033744 |
| TG(18:1/14:0/18:3)   | 0.0028838 | 0.0019938 | 0.0003038 | 0.0021222 | 0.0035474 | 0.0038143 | 0.0022416 | 0.0023281 | 0.0022931 | 0.0054084 | 0.0017419 |
| TG(50:3)             | 0.0040288 | 0.0017867 | 0.0002448 | 0.0017263 | 0.0028456 | 0.0030961 | 0.0015821 | 0.0018438 | 0.0019182 | 0.0046128 | 0.0028075 |
| PI(16:0/18:3)(rep)   | 0.0051252 | 0.000938  | 0.0006309 | 0.0030962 | 0.002796  | 0.0011973 | 0.0031308 | 0.0033354 | 0.0050533 | 0.0050519 | 0.0042166 |
| PI(18:0/18:3)(rep)   | 0.0042003 | 0.0015827 | 0.0008065 | 0.0027285 | 0.0025889 | 0.0048897 | 0.001875  | 0.0054385 | 0.0047736 | 0.0038393 | 0.0043474 |
| DG(18:3/22:1)        | 0.0035341 | 0.0009965 | 0.001149  | 0.0010012 | 0.0021687 | 0.0022135 | 0.0028227 | 0.0036666 | 0.0032365 | 0.0031742 | 0.0057625 |
| DG(16:0/16:1)        | 0.0037974 | 0.0014376 | 0.0003867 | 0.0011623 | 0.0019011 | 0.0021377 | 0.0016143 | 0.0025349 | 0.0024949 | 0.0038784 | 0.0041102 |
| DG(18:0/18:1)        | 0.0028853 | 0.0010017 | 0.0010586 | 0.0011887 | 0.001701  | 0.0016177 | 0.001675  | 0.0047037 | 0.0018097 | 0.0044701 | 0.0042729 |
| DG(16:0/16:0)        | 0.0034354 | 0.001351  | 0.0005316 | 0.0009202 | 0.0021434 | 0.0013131 | 0.0009635 | 0.004055  | 0.0029429 | 0.0033896 | 0.0045483 |
| DG(18:0/16:0)        | 0.0024997 | 0.0012335 | 0.0012739 | 0.001294  | 0.0014031 | 0.001344  | 0.0016423 | 0.0045482 | 0.0018987 | 0.0034811 | 0.003987  |
| DG(18:0/18:0)        | 0.0021774 | 0.0016604 | 0.0010073 | 0.0008536 | 0.0023118 | 0.0016491 | 0.0013713 | 0.0029227 | 0.0019889 | 0.0027011 | 0.0026112 |
| TG(16:0/16:1/18:1)   | 0.00293   | 0.0018843 | 0.0011736 | 0.0023037 | 0.0029839 | 0.00026   | 0.0018561 | 0.0025836 | 0.0015589 | 0.0011513 | 0.0032859 |
| TG(18:1/18:1/18:1)(r | 0.001885  | 0.0013234 | 0.000861  | 0.0017538 | 0.0021102 | 0.0022808 | 0.0013351 | 0.0022978 | 0.0011032 | 0.0021871 | 0.0026457 |
| DG(20:1/18:1)        | 0.0029395 | 0.0009724 | 0.0015799 | 0.0017025 | 0.0013488 | 0.0020012 | 0.002605  | 0.0037765 | 0.0016086 | 0.0059912 | 0.0035208 |
| DG(16:0/18:1)        | 0.0032394 | 0.0010857 | 0.000601  | 0.0013409 | 0.0021854 | 0.0018616 | 0.0014588 | 0.0037824 | 0.0025979 | 0.0043203 | 0.0045427 |
| DG(16:0/18:2)        | 0.0038474 | 0.0014589 | 0.0003416 | 0.0012654 | 0.0023537 | 0.0024867 | 0.0020941 | 0.0045539 | 0.0023218 | 0.0057027 | 0.005947  |
| TG(16:0/18:1/23:1)(r | 0.0020079 | 0.0009038 | 0.0017124 | 0.0032814 | 0.0017618 | 0.0017036 | 0.0016109 | 0.0035984 | 0.0017327 | 0.0065404 | 0.0047056 |
| TG(18:0/18:1/18:1)   | 0.0025329 | 0.0006596 | 0.0007984 | 0.0024389 | 0.0018731 | 0.0016359 | 0.0017501 | 0.005171  | 0.001466  | 0.0046864 | 0.0048094 |
| TG(19:0/18:1/18:1)   | 0.0021439 | 0.0007241 | 0.0011331 | 0.0029126 | 0.0021211 | 0.0016276 | 0.0022325 | 0.0045692 | 0.0013001 | 0.0045624 | 0.0039458 |
| TG(16:0/18:1/23:1)   | 0.0049532 | 0.0007861 | 0.0007986 | 0.0022271 | 0.0019327 | 0.0016659 | 0.003112  | 0.0024843 | 0.0016047 | 0.0058483 | 0.0035439 |
| TG(18:1/18:1/21:1)(r | 0.0023122 | 0.0008643 | 0.0010759 | 0.003777  | 0.0019986 | 0.0020072 | 0.0026622 | 0.0041036 | 0.0018589 | 0.0087647 | 0.0049969 |
| PC(31:2)             | 0.0027374 | 0.0016863 | 0.0004904 | 0.0028899 | 0.0025622 | 0.0016026 | 0.0017883 | 0.0078652 | 0.0064014 | 0.0052332 | 0.0052357 |
| PE(34:2)             | 0.0027382 | 0.0016861 | 0.0004921 | 0.0028911 | 0.0025631 | 0.0016024 | 0.0017883 | 0.0078748 | 0.0064077 | 0.005239  | 0.0052402 |
| PE(18:0/18:2)        | 0.0026244 | 0.001293  | 0.0004057 | 0.0031379 | 0.0019954 | 0.0018729 | 0.0016433 | 0.0067041 | 0.0043256 | 0.0055018 | 0.0044841 |
| PC(33:2)(rep)(rep)   | 0.0027368 | 0.0013726 | 0.0003884 | 0.0032491 | 0.002195  | 0.0020453 | 0.0017062 | 0.006611  | 0.0042642 | 0.005207  | 0.0045103 |
| PE(36:2)             | 0.0027409 | 0.0013723 | 0.0003883 | 0.0032535 | 0.0021943 | 0.0020446 | 0.0017056 | 0.0066184 | 0.0042662 | 0.005205  | 0.004523  |
| PC(33:3)(rep)(rep)   | 0.0014542 | 0.0013682 | 0.000513  | 0.0023476 | 0.0014363 | 0.0017349 | 0.0016175 | 0.0045636 | 0.0053116 | 0.0094069 | 0.0043318 |
| PE(36:3)             | 0.0015494 | 0.0014346 | 0.0005072 | 0.0024984 | 0.0014313 | 0.0017336 | 0.001663  | 0.0031583 | 0.0053537 | 0.0095674 | 0.0043636 |
| PE(18:1/18:2)        | 0.0012117 | 0.0015285 | 0.0004291 | 0.0030316 | 0.0014715 | 0.0016322 | 0.0016814 | 0.0044175 | 0.0054935 | 0.0070414 | 0.0037702 |
| PE(34:0)             | 0.0015337 | 0.0013626 | 0.0004862 | 0.0029103 | 0.0014533 | 0.00182   | 0.0016523 | 0.0041543 | 0.0050714 | 0.0072745 | 0.003566  |
| PS(38:5)             | 0.0015059 | 0.0015685 | 0.0003306 | 0.0030948 | 0.0013357 | 0.001836  | 0.001476  | 0.0042416 | 0.0054231 | 0.0063743 | 0.003691  |
| PE(20:1/18:1)        | 0.0017987 | 0.0009641 | 0.0011847 | 0.0038056 | 0.0013306 | 0.0014366 | 0.0015545 | 0.0048247 | 0.0041478 | 0.0056617 | 0.0036645 |
| PS(38:3)             | 0.0021744 | 0.0014438 | 0.0006134 | 0.0033758 | 0.0019856 | 0.0014056 | 0.0014094 | 0.0053715 | 0.0029329 | 0.0058287 | 0.0034247 |
| PE(18:0/18:1)        | 0.0019846 | 0.0012341 | 0.0007915 | 0.0031297 | 0.0018984 | 0.0013201 | 0.0013554 | 0.005278  | 0.0032722 | 0.0059504 | 0.0039775 |
| PC(33:1)(rep)        | 0.0021799 | 0.0010979 | 0.0007635 | 0.0027369 | 0.0019135 | 0.0014999 | 0.0014087 | 0.0054195 | 0.0032828 | 0.0055399 | 0.003859  |
| PE(36:1)             | 0.0022019 | 0.0011999 | 0.0007515 | 0.002718  | 0.0019028 | 0.0014833 | 0.001233  | 0.005413  | 0.0032826 | 0.0056423 | 0.003911  |
| LPC(15:1)            | 0.0016082 | 0.002422  | 0.0021709 | 0.0012429 | 0.0015724 | 0.0018837 | 0.0025023 | 0.0017358 | 0.0042587 | 0.0096571 | 0.0017633 |
| LPC(15:2)            | 0.0030199 | 0.0038001 | 0.0016769 | 0.0012519 | 0.0024223 | 0.0036012 | 0.0038403 | 0.0018223 | 0.0037652 | 0.0078679 | 0.0015017 |
| LPE(18:2)            | 0.0030236 | 0.0038013 | 0.0016789 | 0.0012529 | 0.0024245 | 0.003604  | 0.0038443 | 0.0018205 | 0.0037688 | 0.0078166 | 0.0015027 |
| PE(18:2/20:4)        | 0.0026064 | 0.001693  | 0.0008024 | 0.0014832 | 0.0016997 | 0.0014048 | 0.0012019 | 0.0024786 | 0.0052979 | 0.0042549 | 0.0030118 |
| PC(17:4/18:2)        | 0.00193   | 0.0013986 | 0.0008141 | 0.001582  | 0.001527  | 0.0019994 | 0.0014381 | 0.0028745 | 0.0054618 | 0.0045958 | 0.0027686 |
| PE(18:2/20:4)(rep)   | 0.001633  | 0.0012527 | 0.0006983 | 0.0015842 | 0.0013671 | 0.0016585 | 0.0011686 | 0.002034  | 0.0054201 | 0.0046282 | 0.0027505 |
| PC(33:4)(rep)        | 0.0012867 | 0.0013751 | 0.0029314 | 0.0028559 | 0.0004362 | 0.0019013 | 0.0010473 | 0.0031591 | 0.0054349 | 0.0073213 | 0.0024831 |
| PE(18:3/18:2)        | 0.0017458 | 0.0017732 | 0.000831  | 0.002442  | 0.0010763 | 0.0018368 | 0.0020255 | 0.0024003 | 0.0038998 | 0.0112153 | 0.0023593 |
| PE(36:5)             | 0.0017686 | 0.0022204 | 0.0008095 | 0.0025633 | 0.0013006 | 0.0018311 | 0.0021255 | 0.0022992 | 0.0036781 | 0.011458  | 0.0025887 |
| PC(33:4)             | 0.0019112 | 0.0014989 | 0.000556  | 0.0027614 | 0.0019706 | 0.0017486 | 0.0013642 | 0.0021425 | 0.0037133 | 0.0083576 | 0.0019166 |
| PE(36:4)             | 0.001913  | 0.0014375 | 0.0005565 | 0.0026443 | 0.0018912 | 0.0018262 | 0.0014458 | 0.0020714 | 0.0038962 | 0.0096371 | 0.0014717 |

|                      |           |           |           |           |           |           |           |           |           |           |           |
|----------------------|-----------|-----------|-----------|-----------|-----------|-----------|-----------|-----------|-----------|-----------|-----------|
| PE(18:2/18:2)        | 0.002138  | 0.0013924 | 0.0006787 | 0.0028987 | 0.0013938 | 0.0018166 | 0.001923  | 0.002302  | 0.0036473 | 0.010914  | 0.0025468 |
| PS(38:6)             | 0.0019972 | 0.0015758 | 0.0005921 | 0.003042  | 0.0016459 | 0.001934  | 0.001679  | 0.0023308 | 0.0036553 | 0.0093608 | 0.0023438 |
| TG(18:1/18:2/18:2)(r | 0.0041075 | 0.0032766 | 0.0021084 | 0.0039475 | 0.0006837 | 0.0056811 | 0.0033772 | 0.003827  | 0.0035405 | 0.0051581 | 0.004581  |
| TG(16:0/18:2/18:3)(r | 0.0044635 | 0.004108  | 0.0015447 | 0.003407  | 0.0025672 | 0.0053082 | 0.0032638 | 0.0034655 | 0.0008564 | 0.0039365 | 0.004625  |
| TG(18:1/18:1/18:2)(r | 0.0037068 | 0.0003532 | 0.001527  | 0.0035632 | 0.0022365 | 0.0048152 | 0.0029263 | 0.0039656 | 0.0034894 | 0.0002318 | 0.0041379 |
| TG(16:1/18:2/18:3)   | 0.003483  | 0.0036681 | 0.0003627 | 0.002766  | 0.003137  | 0.0047218 | 0.0032931 | 0.0031185 | 0.0020977 | 0.0047522 | 0.0045073 |
| TG(18:3/18:2/18:2)   | 0.0023012 | 0.0033387 | 0.0003664 | 0.002861  | 0.002069  | 0.0065696 | 0.0038879 | 0.0032395 | 0.0032238 | 0.0102204 | 0.0036193 |
| DG(18:2/20:4)        | 0.0024336 | 0.0039216 | 0.0003306 | 0.0020199 | 0.0036706 | 0.0024103 | 0.0022337 | 0.0039159 | 0.0028434 | 0.0061041 | 0.005241  |
| TG(18:1/18:2/18:2)   | 0.0026559 | 0.0020585 | 0.0002657 | 0.002435  | 0.0033422 | 0.0052852 | 0.0029224 | 0.0027821 | 0.0023909 | 0.0072567 | 0.0037235 |
| TG(18:1/18:2/18:3)   | 0.0027688 | 0.0030713 | 0.0002302 | 0.0028311 | 0.0031663 | 0.0054059 | 0.0039812 | 0.0028628 | 0.002147  | 0.0083887 | 0.0037809 |
| DG(18:1/22:1)        | 0.0031958 | 0.0018173 | 0.0032009 | 0.003367  | 0.0017468 | 0.0023554 | 0.0025812 | 0.0039252 | 0.0009676 | 0.0036805 | 0.0027106 |
| TG(16:0/18:1/23:0)   | 0.001827  | 0.0022629 | 0.0014298 | 0.0022149 | 0.0011294 | 0.0010743 | 0.0016196 | 0.0013591 | 0.0032325 | 0.0058113 | 0.0022481 |
| TG(18:1/18:1/23:0)   | 0.001517  | 0.0010153 | 0.0015885 | 0.0054216 | 0.0016193 | 0.0012607 | 0.0019296 | 0.003813  | 0.0015575 | 0.0068548 | 0.0035156 |
| TG(25:0/16:0/18:1)   | 0.0016587 | 0.0011303 | 0.0010075 | 0.0022635 | 0.0023347 | 0.0008604 | 0.0017438 | 0.003585  | 0.0016406 | 0.0055359 | 0.0034629 |
| TG(24:1/18:2/22:1)   | 0.0017319 | 0.0025883 | 0.0012536 | 0.0038665 | 0.0018318 | 0.00143   | 0.0014236 | 0.00216   | 0.0041233 | 0.0053825 | 0.0021722 |
| TG(18:1/22:0/24:0)   | 0.0019296 | 0.0019577 | 0.0011961 | 0.0027369 | 0.0018083 | 0.0015504 | 0.0016418 | 0.0016132 | 0.0016688 | 0.0044062 | 0.0017442 |
| TG(18:1/24:0/24:0)   | 0.0021089 | 0.002114  | 0.0011745 | 0.0029431 | 0.0017342 | 0.0011912 | 0.0014434 | 0.0016166 | 0.0021558 | 0.0049447 | 0.0019981 |
| TG(18:1/22:1/24:0)   | 0.0016819 | 0.0016276 | 0.0013279 | 0.0036646 | 0.0017925 | 0.0016031 | 0.0014804 | 0.0019813 | 0.0017037 | 0.0050402 | 0.0018352 |
| TG(30:0/18:1/18:1)   | 0.0013472 | 0.00187   | 0.0011562 | 0.0038269 | 0.0025294 | 0.0016278 | 0.0015321 | 0.0017927 | 0.0018866 | 0.0055173 | 0.0022552 |
| TG(59:1)             | 0.001741  | 0.001131  | 0.0012493 | 0.0023651 | 0.0013617 | 0.0012044 | 0.0012444 | 0.0022018 | 0.0015212 | 0.0064095 | 0.0020307 |
| TG(16:0/18:1/22:0)   | 0.0018089 | 0.0011493 | 0.0013571 | 0.0023192 | 0.0013623 | 0.0013362 | 0.0012079 | 0.0021346 | 0.0015684 | 0.0044325 | 0.0018703 |
| TG(16:0/18:1/24:0)   | 0.0018394 | 0.0012804 | 0.0009417 | 0.0023323 | 0.0016195 | 0.0014297 | 0.001266  | 0.0018768 | 0.0017002 | 0.0045849 | 0.0017269 |
| TG(27:0/16:0/18:1)   | 0.0017794 | 0.0011861 | 0.0013434 | 0.0030549 | 0.0023367 | 0.0008662 | 0.0018983 | 0.0022989 | 0.0019228 | 0.006034  | 0.0016441 |
| TG(16:0/22:1/24:0)   | 0.0017955 | 0.0016994 | 0.0011221 | 0.0030591 | 0.0017122 | 0.001351  | 0.0014782 | 0.0016785 | 0.0017527 | 0.0042766 | 0.0015876 |
| TG(18:0/18:1/24:0)   | 0.0018074 | 0.0015115 | 0.0009812 | 0.0028699 | 0.0016268 | 0.0013751 | 0.0013017 | 0.0017514 | 0.0016995 | 0.004578  | 0.0017836 |
| TG(18:3/22:1/22:1)   | 0.0018701 | 0.0013876 | 0.0013061 | 0.0033085 | 0.0019828 | 0.0015656 | 0.001848  | 0.0038413 | 0.0027943 | 0.0103653 | 0.0036612 |
| TG(24:0/18:2/20:4)   | 0.0018496 | 0.0013501 | 0.001413  | 0.0024923 | 0.0017539 | 0.0014774 | 0.0016127 | 0.0028536 | 0.002015  | 0.0032166 | 0.0029976 |
| TG(24:1/18:2/18:3)   | 0.0019134 | 0.0013919 | 0.0022884 | 0.0026074 | 0.0012856 | 0.0017786 | 0.00226   | 0.0048569 | 0.0019945 | 0.0026122 | 0.0046978 |
| TG(25:0/18:1/18:2)   | 0.0021872 | 0.0011512 | 0.0014392 | 0.0023856 | 0.0016401 | 0.001474  | 0.0016914 | 0.0038753 | 0.0033519 | 0.009925  | 0.0030905 |
| TG(24:0/18:2/18:3)   | 0.0032287 | 0.0011045 | 0.0020288 | 0.0036164 | 0.0016059 | 0.0016013 | 0.0024106 | 0.0023044 | 0.0013244 | 0.0056826 | 0.0019477 |
| TG(25:0/18:1/18:1)   | 0.0024511 | 0.0011008 | 0.0013441 | 0.0024413 | 0.0015275 | 0.0010414 | 0.0016516 | 0.0038615 | 0.0016831 | 0.0071075 | 0.0032992 |
| TG(22:1/18:2/22:1)   | 0.0016385 | 0.0013489 | 0.0015157 | 0.0038376 | 0.0014915 | 0.0017356 | 0.0018301 | 0.0037846 | 0.0017995 | 0.0064905 | 0.0023464 |
| TG(26:0/18:1/18:1)   | 0.0015835 | 0.0012458 | 0.0013115 | 0.0033146 | 0.0017492 | 0.0014343 | 0.0017623 | 0.0019402 | 0.0017362 | 0.0047431 | 0.0017338 |
| TG(18:1/22:1/24:1)   | 0.0016689 | 0.0013839 | 0.0020341 | 0.0068374 | 0.0018866 | 0.0016727 | 0.0017845 | 0.0026189 | 0.0017767 | 0.0066667 | 0.0023178 |
| TG(26:0/18:1/18:2)   | 0.0015699 | 0.0013933 | 0.0020261 | 0.0046453 | 0.0027513 | 0.0017432 | 0.0015769 | 0.0027403 | 0.0018338 | 0.0056217 | 0.0022989 |
| TG(20:0/18:1/18:2)   | 0.0024891 | 0.0007554 | 0.0012701 | 0.0032659 | 0.0013985 | 0.0019412 | 0.002655  | 0.0034968 | 0.0018231 | 0.0050621 | 0.0032293 |
| TG(18:1/18:2/24:1)   | 0.0021086 | 0.0011442 | 0.0011859 | 0.0032091 | 0.0014836 | 0.0020497 | 0.0019271 | 0.0034585 | 0.0021682 | 0.0068081 | 0.0029367 |
| TG(18:1/18:2/22:1)   | 0.0021624 | 0.0011331 | 0.0016698 | 0.0039894 | 0.001837  | 0.0020417 | 0.0024234 | 0.0035849 | 0.0017366 | 0.0060004 | 0.0031232 |
| TG(18:1/18:2/22:0)   | 0.0020179 | 0.0010259 | 0.0020213 | 0.0036384 | 0.001268  | 0.0021633 | 0.0018302 | 0.0027554 | 0.0013952 | 0.0051097 | 0.0021261 |
| TG(60:3)             | 0.0016112 | 0.0008857 | 0.0016263 | 0.0043108 | 0.0014612 | 0.0022351 | 0.0019383 | 0.0030829 | 0.0012838 | 0.0056616 | 0.0022341 |
| DG(18:1/22:0)        | 0.0015352 | 0.001209  | 0.0015668 | 0.001592  | 0.0010585 | 0.0011234 | 0.0009199 | 0.0026118 | 0.0017343 | 0.0056688 | 0.0020989 |
| DG(20:0/18:1)        | 0.0021875 | 0.0009628 | 0.0017545 | 0.0018713 | 0.0014369 | 0.0017733 | 0.0013958 | 0.0029116 | 0.0016933 | 0.0059529 | 0.0026144 |
| TG(20:1/18:1/22:1)   | 0.0017263 | 0.0012291 | 0.0013016 | 0.0030306 | 0.0013864 | 0.0017415 | 0.0015466 | 0.0025964 | 0.0015778 | 0.0054174 | 0.0023223 |
| TG(16:0/18:1/24:1)   | 0.0019179 | 0.0011486 | 0.0013072 | 0.0026641 | 0.0013628 | 0.0015472 | 0.0013957 | 0.0023992 | 0.0013899 | 0.0047739 | 0.0020095 |
| TG(18:1/18:1/24:0)   | 0.0017624 | 0.0012627 | 0.0011011 | 0.0027741 | 0.0015242 | 0.0014784 | 0.0013479 | 0.0020749 | 0.0016984 | 0.0049184 | 0.0019553 |
| TG(16:0/18:1/22:1)   | 0.0022288 | 0.0009118 | 0.0017822 | 0.003124  | 0.0012442 | 0.001742  | 0.0015771 | 0.0029754 | 0.0013957 | 0.0048085 | 0.0024134 |
| TG(59:2)             | 0.0021252 | 0.0009601 | 0.0016277 | 0.0030852 | 0.0014107 | 0.0015663 | 0.0018505 | 0.0028528 | 0.0014385 | 0.0082204 | 0.0025655 |
| TG(16:0/16:0/24:0)   | 0.0023235 | 0.0023849 | 0.0012774 | 0.0036868 | 0.0032571 | 0.0023941 | 0.002611  | 0.0008117 | 0.0015759 | 0.0020286 | 0.0011337 |
| TG(29:0/18:0/18:1)   | 0.0027821 | 0.0021902 | 0.001556  | 0.0059781 | 0.004954  | 0.0013744 | 0.0019617 | 0.0025512 | 0.0019822 | 0.0045044 | 0.0017497 |
| TG(18:1/22:1/23:0)   | 0.0016826 | 0.0011431 | 0.0021544 | 0.0051956 | 0.0025721 | 0.0009942 | 0.0017119 | 0.0027547 | 0.0017982 | 0.0049846 | 0.0022448 |
| TG(29:0/16:0/18:1)   | 0.0022283 | 0.001856  | 0.0014773 | 0.0064391 | 0.0038543 | 0.0010209 | 0.0017843 | 0.0028615 | 0.001175  | 0.0045123 | 0.0016362 |
| TG(30:0/18:1/20:1)   | 0.001646  | 0.0017252 | 0.0013469 | 0.0045841 | 0.0019974 | 0.0015305 | 0.0016029 | 0.0023889 | 0.0033393 | 0.0071692 | 0.0022707 |
| TG(30:0/18:1/18:2)   | 0.0015609 | 0.0014343 | 0.0019541 | 0.0057331 | 0.0021181 | 0.0020216 | 0.0015937 | 0.0033537 | 0.0023174 | 0.0078393 | 0.0024693 |
| TG(30:0/18:2/18:2)   | 0.0013024 | 0.0017317 | 0.0016418 | 0.0053921 | 0.001737  | 0.0019644 | 0.0013694 | 0.0030794 | 0.003215  | 0.0068691 | 0.0037422 |
| PS(18:0/18:1)        | 0.0027311 | 0.0018148 | 0.0012917 | 0.0012043 | 0.0022398 | 0.001843  | 0.0023346 | 0.0018007 | 0.0100797 | 0.0013109 | 0.0054999 |
| PS(18:0/20:4)        | 0.0015272 | 0.0022526 | 0.0004468 | 0.0017327 | 0.0017248 | 0.0018001 | 0.001634  | 0.0034448 | 0.0063956 | 0.0010277 | 0.0030334 |
| SM(d18:1/24:3)       | 0.0021685 | 0.0033123 | 0.0006052 | 0.0024932 | 0.0062455 | 0.0027534 | 0.0015963 | 0.000907  | 0.0032248 | 0.0034148 | 0.0014923 |
| SM(d18:2/24:3)       | 0.0028083 | 0.0038748 | 0.0003539 | 0.0024345 | 0.008683  | 0.0037417 | 0.0030196 | 0.0015552 | 0.0044329 | 0.0014682 | 0.0012807 |

|                       |           |           |           |           |           |           |           |           |           |           |           |
|-----------------------|-----------|-----------|-----------|-----------|-----------|-----------|-----------|-----------|-----------|-----------|-----------|
| TG(16:0/18:1/18:1)(r  | 0.0035366 | 0.0026636 | 0.0017863 | 0.0031708 | 0.0037913 | 0.0042766 | 0.0025629 | 0.003134  | 0.0003854 | 0.0011855 | 0.0043893 |
| Cer(d18:2/22:0)       | 0.0015081 | 0.0013176 | 0.0016471 | 0.0015514 | 0.0036324 | 0.0030026 | 0.0023526 | 0.0032735 | 0.001788  | 0.0017396 | 0.0016629 |
| Cer(d18:1/22:0)       | 0.0021622 | 0.0010164 | 0.000632  | 0.0014705 | 0.0062072 | 0.0018307 | 0.0028134 | 0.0036176 | 0.0014403 | 0.002187  | 0.0033839 |
| Cer(d18:1/24:0)       | 0.003579  | 0.0023161 | 0.0003525 | 0.0012834 | 0.0101233 | 0.0021116 | 0.0029589 | 0.0025332 | 0.0033303 | 0.0013015 | 0.0028734 |
| Cer(d24:0/18:0        | 0.0026014 | 0.0031635 | 0.000328  | 0.0016464 | 0.0068084 | 0.0029754 | 0.0025291 | 0.0012296 | 0.0033909 | 0.0047009 | 0.0008928 |
| TG(16:0/18:2/18:2)(r  | 0.0029677 | 0.0020097 | 0.0006702 | 0.0023739 | 0.0028494 | 0.0025355 | 0.0018353 | 0.0024128 | 0.0020305 | 0.0033532 | 0.0023873 |
| PC(36:2)(rep)(rep)(re | 0.0026706 | 0.0016053 | 0.0002984 | 0.001701  | 0.0021495 | 0.0014726 | 0.0036747 | 0.0019749 | 0.0017223 | 0.0020375 | 0.0037909 |
| LPC(16:0)(rep)(rep)   | 0.0018431 | 0.0022098 | 0.0007061 | 0.0010583 | 0.0014915 | 0.0020157 | 0.0024213 | 0.0009843 | 0.0021969 | 0.0011495 | 0.0011921 |
| SM(d34:2)(rep)        | 0.0013433 | 0.0015076 | 0.0007076 | 0.0016325 | 0.0015315 | 0.0016106 | 0.00187   | 0.0021606 | 0.0039846 | 0.0011165 | 0.0019175 |
| SM(d34:2)(rep)(rep)   | 0.0015009 | 0.0016059 | 0.0008497 | 0.0015194 | 0.0017652 | 0.0015197 | 0.0018006 | 0.0014672 | 0.0025185 | 0.0009039 | 0.0017082 |
| LPC(20:0)             | 0.0019863 | 0.0032537 | 0.0024628 | 0.0015981 | 0.0016515 | 0.0055346 | 0.0008581 | 0.001313  | 0.0023607 | 0.0028885 | 0.0014756 |
| PC(24:0/18:2)         | 0.0021892 | 0.0034467 | 0.00167   | 0.001834  | 0.0029633 | 0.0031093 | 0.0017083 | 0.0011546 | 0.0037565 | 0.0036402 | 0.0013693 |
| PC(42:4)              | 0.001441  | 0.0023082 | 0.0015283 | 0.0014458 | 0.0030075 | 0.003175  | 0.0010493 | 0.0007075 | 0.0027281 | 0.0023273 | 0.0006102 |
| PC(24:0/20:4)         | 0.0015997 | 0.0026782 | 0.0013272 | 0.0015627 | 0.0030114 | 0.0027122 | 0.0010744 | 0.0009424 | 0.0026348 | 0.002227  | 0.0016586 |
| PC(44:4)              | 0.0013502 | 0.0028135 | 0.0013293 | 0.0017163 | 0.003194  | 0.0026117 | 0.0012923 | 0.0014869 | 0.0023664 | 0.0023051 | 0.0015775 |
| PC(42:1)              | 0.0023199 | 0.0023272 | 0.0049471 | 0.0013999 | 0.0019282 | 0.0060579 | 0.0018728 | 0.0020989 | 0.0029248 | 0.0034045 | 0.0026155 |
| PC(22:0/18:2)         | 0.0027138 | 0.0022467 | 0.0182833 | 0.0036645 | 0.0018179 | 0.0041628 | 0.0014164 | 0.0032719 | 0.0027011 | 0.0039292 | 0.0009587 |
| PC(40:2)              | 0.0017844 | 0.0018873 | 0.0130227 | 0.0032342 | 0.0015765 | 0.0035266 | 0.0019566 | 0.0024771 | 0.0026282 | 0.0039103 | 0.00108   |
| PC(42:2)              | 0.0022132 | 0.0025313 | 0.0048389 | 0.0019315 | 0.0023659 | 0.0036718 | 0.0017918 | 0.0012963 | 0.0027604 | 0.0036944 | 0.0015713 |
| PC(46:4)              | 0.0020469 | 0.0038118 | 0.0009955 | 0.001129  | 0.0029145 | 0.0019278 | 0.0013112 | 0.0073283 | 0.0037956 | 0.0031006 | 0.0143898 |
| CerG1(d18:1/22:0)     | 0.0028863 | 0.0037817 | 0.0022084 | 0.0012384 | 0.002537  | 0.0063585 | 0.0025359 | 0.0017042 | 0.001179  | 0.0037421 | 0.0015687 |
| LPC(18:2)(rep)(rep)   | 0.0023081 | 0.004814  | 0.0016203 | 0.0016696 | 0.002075  | 0.0032058 | 0.0045991 | 0.0008536 | 0.0007207 | 0.0027035 | 0.002082  |
| PC(20:4/20:4)         | 0.0039503 | 0.0059628 | 0.0028468 | 0.0020811 | 0.0016868 | 0.0055211 | 0.0052507 | 0.0007189 | 0.0023106 | 0.0026817 | 0.0018474 |
| PS(43:7)              | 0.0039869 | 0.0057567 | 0.0029138 | 0.0021688 | 0.0016249 | 0.0057565 | 0.005188  | 0.0007463 | 0.0022148 | 0.0027546 | 0.0017213 |
| PC(42:8)(rep)         | 0.0037915 | 0.0028804 | 0.0012726 | 0.0010719 | 0.0019944 | 0.0064856 | 0.0017241 | 0.0005365 | 0.0041733 | 0.0013588 | 0.0013608 |
| PC(42:9)(rep)         | 0.0046289 | 0.0049753 | 0.0016207 | 0.0021139 | 0.0027846 | 0.0063959 | 0.0045905 | 0.0010045 | 0.0011273 | 0.0016242 | 0.0011848 |
| PC(18:0/22:5)         | 0.0056302 | 0.0017    | 0.0021612 | 0.0018241 | 0.0029212 | 0.0048224 | 0.0028639 | 0.0016613 | 0.001095  | 0.0032281 | 0.0021195 |
| PC(40:5)              | 0.0057998 | 0.0019712 | 0.0018453 | 0.001971  | 0.0032526 | 0.004664  | 0.002825  | 0.001705  | 0.0010777 | 0.0022209 | 0.0018948 |
| PC(38:6)              | 0.0039821 | 0.0037256 | 0.0021511 | 0.002006  | 0.0016429 | 0.00488   | 0.0038577 | 0.0015505 | 0.0017654 | 0.0025515 | 0.0012187 |
| LPC(14:0)             | 0.0056933 | 0.0014613 | 0.0009773 | 0.0014176 | 0.0016565 | 0.0028056 | 0.0023377 | 0.0009591 | 0.0032887 | 0.0037175 | 0.0014189 |
| LPC(14:0)(rep)        | 0.0062415 | 0.001432  | 0.0009205 | 0.0014072 | 0.0019    | 0.0027786 | 0.0026058 | 0.0008309 | 0.0028834 | 0.0031011 | 0.0011944 |
| LPC(18:1p)(rep)(rep)  | 0.0030281 | 0.00213   | 0.0017914 | 0.0011085 | 0.0027874 | 0.0029225 | 0.0059303 | 0.0009908 | 0.0029802 | 0.0022604 | 0.0015049 |
| LdMePE(18:0)          | 0.0030749 | 0.0027292 | 0.0021426 | 0.0007347 | 0.0017713 | 0.0040774 | 0.0034806 | 0.001267  | 0.0018604 | 0.0030106 | 0.0018483 |
| LPC(18:0)(rep)        | 0.0034203 | 0.0025144 | 0.0019521 | 0.0009858 | 0.0019366 | 0.0040441 | 0.0042354 | 0.0014035 | 0.0018332 | 0.0027053 | 0.0018074 |
| LPC(22:3)             | 0.0017077 | 0.0045455 | 0.0034955 | 0.0019787 | 0.0009378 | 0.0031495 | 0.0035447 | 0.0012291 | 0.0025948 | 0.0053413 | 0.0021391 |
| PC(36:0)              | 0.0018888 | 0.0020383 | 0.0026734 | 0.0022181 | 0.0018908 | 0.0028016 | 0.0011495 | 0.0006427 | 0.0014578 | 0.0028672 | 0.0008678 |

| SP_12     | SP_13     | SP_15     | SP_16     | SP_17     | SP_18     | SP_19     | SP_20     | SP_21     | SP_22     | SP_23     | SP_24     | SP_25     |
|-----------|-----------|-----------|-----------|-----------|-----------|-----------|-----------|-----------|-----------|-----------|-----------|-----------|
| 0.0086152 | 0.0051191 | 0.0023645 | 0.0093267 | 0.0026066 | 0.0028518 | 0.0025089 | 0.0026179 | 0.0047021 | 0.0023082 | 0.0072847 | 0.0104015 | 0.0099748 |
| 0.0058961 | 0.0019356 | 0.0055424 | 0.0113775 | 0.0028126 | 0.0046368 | 0.0114031 | 0.0081852 | 0.0011931 | 0.0037303 | 0.0031815 | 0.0041072 | 0.0064496 |
| 0.0023558 | 0.0031019 | 0.003529  | 0.0033778 | 0.0026463 | 0.0077947 | 0.0025047 | 0.0057929 | 0.0053537 | 0.0018567 | 0.0106519 | 0.0041969 | 0.0017555 |
| 0.0024023 | 0.0031561 | 0.0035491 | 0.0033923 | 0.0026718 | 0.0079831 | 0.0025821 | 0.0057181 | 0.0052064 | 0.0018305 | 0.0106956 | 0.0042716 | 0.0017919 |
| 0.0044606 | 0.0076488 | 0.0029155 | 0.0025316 | 0.0014296 | 0.0043936 | 0.0045574 | 0.0061243 | 0.0065542 | 0.0037538 | 0.0094629 | 0.0019589 | 0.0040768 |
| 0.003896  | 0.0076551 | 0.0027348 | 0.0023    | 0.0016204 | 0.0043634 | 0.005368  | 0.0063244 | 0.00674   | 0.003887  | 0.008501  | 0.0019103 | 0.0048742 |
| 0.0051447 | 0.0073627 | 0.0031426 | 0.0031485 | 0.0013497 | 0.0049712 | 0.0056978 | 0.0056089 | 0.0060443 | 0.0040197 | 0.0073949 | 0.0016771 | 0.0047872 |
| 0.004185  | 0.0068914 | 0.0029234 | 0.002674  | 0.0014054 | 0.0044198 | 0.0072971 | 0.006444  | 0.007573  | 0.0046311 | 0.0074101 | 0.0017086 | 0.0052011 |
| 0.0071032 | 0.0048905 | 0.0051878 | 0.0102262 | 0.0032981 | 0.0031819 | 0.0032113 | 0.0060781 | 0.0065327 | 0.001859  | 0.0029829 | 0.0054572 | 0.0023178 |
| 0.0071824 | 0.003168  | 0.011278  | 0.0104813 | 0.0023772 | 0.0072266 | 0.0053886 | 0.0052529 | 0.0049631 | 0.0025619 | 0.0014062 | 0.0053234 | 0.0039214 |
| 0.0078999 | 0.0029714 | 0.0063683 | 0.0097574 | 0.002139  | 0.0128111 | 0.0068738 | 0.004723  | 0.0092321 | 0.0023665 | 0.0015646 | 0.003824  | 0.0040485 |
| 0.0020606 | 0.0216433 | 0.0035776 | 0.0016741 | 0.0023045 | 0.0032972 | 0.0039244 | 0.0095427 | 0.0026117 | 0.0058376 | 0.0041829 | 0.0107627 | 0.0080346 |
| 0.0021208 | 0.0347762 | 0.0047962 | 0.00161   | 0.0021204 | 0.0032715 | 0.0033339 | 0.0056783 | 0.0019886 | 0.0042767 | 0.0036122 | 0.011395  | 0.008821  |
| 0.0017254 | 0.0262301 | 0.0030128 | 0.0013421 | 0.0026666 | 0.003213  | 0.003122  | 0.0059549 | 0.0050814 | 0.0038152 | 0.0041738 | 0.0123944 | 0.0053044 |
| 0.0021036 | 0.0128359 | 0.0074845 | 0.0037489 | 0.0022488 | 0.0027864 | 0.0034807 | 0.0073772 | 0.0026957 | 0.0034186 | 0.0050614 | 0.0065606 | 0.0099887 |
| 0.0022878 | 0.0218079 | 0.0065192 | 0.0017169 | 0.0012933 | 0.0023092 | 0.0021342 | 0.0083061 | 0.0014701 | 0.0028358 | 0.0053953 | 0.0078197 | 0.0085545 |
| 0.0028992 | 0.0132359 | 0.0014657 | 0.0058816 | 0.0018095 | 0.0032492 | 0.0046562 | 0.0040506 | 0.0063247 | 0.0035675 | 0.0011081 | 0.002772  | 0.0048865 |
| 0.0022308 | 0.0080443 | 0.0028437 | 0.0044665 | 0.0021783 | 0.0032128 | 0.0049551 | 0.0035027 | 0.0044561 | 0.0039785 | 0.0009122 | 0.0041488 | 0.0078301 |
| 0.002325  | 0.0073541 | 0.0030866 | 0.0044299 | 0.0038108 | 0.0036812 | 0.0043409 | 0.0038304 | 0.0052823 | 0.0045677 | 0.0009661 | 0.0032315 | 0.0102384 |
| 0.006514  | 0.0028804 | 0.0041622 | 0.0092896 | 0.0021842 | 0.0040976 | 0.0131267 | 0.0044623 | 0.0036809 | 0.0028143 | 0.0024091 | 0.0042176 | 0.0120487 |
| 0.0037661 | 0.0048618 | 0.005701  | 0.0077538 | 0.0021632 | 0.0039759 | 0.0080544 | 0.0043174 | 0.0036756 | 0.0032084 | 0.0007942 | 0.0036075 | 0.0088034 |
| 0.0045837 | 0.0041154 | 0.0074842 | 0.0066092 | 0.0013948 | 0.0041757 | 0.0068398 | 0.0057271 | 0.0031821 | 0.0033796 | 0.0014798 | 0.0030146 | 0.0085948 |
| 0.0048982 | 0.0043483 | 0.0069748 | 0.007181  | 0.0014715 | 0.0040397 | 0.0069791 | 0.0045099 | 0.0036246 | 0.0034833 | 0.0014494 | 0.0031745 | 0.008847  |
| 0.0039881 | 0.0048663 | 0.0070351 | 0.0078523 | 0.0022455 | 0.002925  | 0.0081374 | 0.0042258 | 0.0063301 | 0.0040312 | 0.0038814 | 0.0036502 | 0.00804   |
| 0.0036576 | 0.0024077 | 0.0066976 | 0.0078522 | 0.0029168 | 0.0028373 | 0.0067461 | 0.0059567 | 0.0040581 | 0.0037606 | 0.0016032 | 0.0027182 | 0.0087637 |
| 0.0062911 | 0.0080054 | 0.0072021 | 0.0061891 | 0.0022206 | 0.0060924 | 0.0072177 | 0.0027212 | 0.001979  | 0.0015693 | 0.0034687 | 0.0068245 | 0.0089011 |
| 0.0045065 | 0.0121163 | 0.0064856 | 0.005763  | 0.0017727 | 0.0034396 | 0.0082841 | 0.0037548 | 0.0027613 | 0.0021833 | 0.0012252 | 0.0066694 | 0.0054162 |
| 0.0085734 | 0.0106543 | 0.0040309 | 0.007884  | 0.0006291 | 0.0029906 | 0.0094619 | 0.0075556 | 0.0043363 | 0.0016658 | 0.0010811 | 0.0012056 | 0.0030587 |
| 0.0083245 | 0.017759  | 0.0020748 | 0.0128794 | 0.0015327 | 0.0041631 | 0.0082699 | 0.0040419 | 0.0042522 | 0.0038739 | 0.0013409 | 0.0030149 | 0.0027555 |
| 0.007949  | 0.0024729 | 0.0025858 | 0.0150123 | 0.0014847 | 0.0033946 | 0.0090866 | 0.0038101 | 0.0056088 | 0.0039643 | 0.0012175 | 0.002517  | 0.0039101 |
| 0.0080895 | 0.0022814 | 0.00233   | 0.014943  | 0.0017417 | 0.0041173 | 0.0092698 | 0.0036131 | 0.0056345 | 0.0039949 | 0.0012027 | 0.0027581 | 0.0038808 |
| 0.0095718 | 0.0132555 | 0.0027742 | 0.0140141 | 0.0009254 | 0.0042151 | 0.012547  | 0.0050216 | 0.016967  | 0.0017751 | 0.0015741 | 0.0035231 | 0.0025642 |
| 0.0146318 | 0.0097499 | 0.0033843 | 0.0117911 | 0.0018792 | 0.0037047 | 0.0101571 | 0.0049706 | 0.0058261 | 0.0055828 | 0.0015746 | 0.0020738 | 0.0025688 |
| 0.0130379 | 0.009727  | 0.0038892 | 0.0108588 | 0.002743  | 0.0039999 | 0.0110991 | 0.007822  | 0.0062234 | 0.0027126 | 0.0016148 | 0.0020417 | 0.0045587 |
| 0.0120575 | 0.0090969 | 0.0033936 | 0.009646  | 0.0019838 | 0.0045064 | 0.0099135 | 0.0075028 | 0.0069945 | 0.0024773 | 0.0021423 | 0.002848  | 0.0042564 |
| 0.0035018 | 0.0038543 | 0.0035657 | 0.0047231 | 0.0023055 | 0.0041058 | 0.0045726 | 0.0034525 | 0.0035644 | 0.003001  | 0.0027566 | 0.005001  | 0.0031761 |
| 0.0117186 | 0.0015828 | 0.0024926 | 0.0155346 | 0.0031317 | 0.0027925 | 0.006893  | 0.0042812 | 0.0051518 | 0.0129876 | 0.0028894 | 0.0017694 | 0.0017195 |
| 0.0109818 | 0.0114343 | 0.0025434 | 0.0128042 | 0.0030019 | 0.002888  | 0.0072335 | 0.0049384 | 0.0053045 | 0.0119227 | 0.0031924 | 0.0019437 | 0.0015456 |
| 0.0049558 | 0.0016092 | 0.0032966 | 0.0065499 | 0.0055794 | 0.0026164 | 0.0025502 | 0.0044618 | 0.0063465 | 0.0148111 | 0.0050729 | 0.002229  | 0.0034404 |
| 0.0049327 | 0.0015833 | 0.0033056 | 0.0065225 | 0.0055332 | 0.0026516 | 0.0030255 | 0.0043614 | 0.0063206 | 0.0143897 | 0.005085  | 0.002254  | 0.0033952 |
| 0.0096371 | 0.0024346 | 0.0057138 | 0.0120412 | 0.003187  | 0.0036971 | 0.0085718 | 0.0060829 | 0.0011949 | 0.0245163 | 0.0026145 | 0.0037362 | 0.0023335 |
| 0.0048109 | 0.0030692 | 0.0038217 | 0.010235  | 0.0067072 | 0.00386   | 0.0062009 | 0.0041328 | 0.005763  | 0.0107195 | 0.0030936 | 0.0031032 | 0.0054388 |
| 0.0047443 | 0.0063848 | 0.0041399 | 0.0081448 | 0.0070625 | 0.0040201 | 0.0069297 | 0.0043741 | 0.0053082 | 0.0110324 | 0.0037913 | 0.0028987 | 0.0054545 |
| 0.0045975 | 0.0020146 | 0.0050785 | 0.0081617 | 0.0035692 | 0.0019247 | 0.0051046 | 0.0056532 | 0.0029789 | 0.0144194 | 0.0041712 | 0.0044764 | 0.0057438 |
| 0.0040157 | 0.0111599 | 0.0040699 | 0.005515  | 0.003286  | 0.0031034 | 0.005698  | 0.0055404 | 0.0033488 | 0.016603  | 0.0042768 | 0.0043302 | 0.0059281 |
| 0.0041385 | 0.00438   | 0.004036  | 0.0027095 | 0.047685  | 0.0046998 | 0.003621  | 0.0052699 | 0.0026383 | 0.0154317 | 0.0020938 | 0.0027602 | 0.0036977 |
| 0.004415  | 0.0048961 | 0.0044641 | 0.0018376 | 0.0252332 | 0.0051577 | 0.0056255 | 0.0058759 | 0.0032191 | 0.0045191 | 0.0029566 | 0.0029474 | 0.0039869 |
| 0.0037517 | 0.0077939 | 0.0052351 | 0.0027661 | 0.014115  | 0.0042996 | 0.008839  | 0.0073414 | 0.0026549 | 0.0085642 | 0.0044328 | 0.004994  | 0.0053541 |
| 0.0044046 | 0.0032297 | 0.0055835 | 0.0029473 | 0.0132547 | 0.0038998 | 0.0086626 | 0.0064603 | 0.0032322 | 0.0085033 | 0.0043097 | 0.0054301 | 0.0064297 |
| 0.00246   | 0.0128057 | 0.0041399 | 0.001209  | 0.0042853 | 0.0042326 | 0.0028131 | 0.0085077 | 0.0046118 | 0.0044822 | 0.0027074 | 0.0061832 | 0.0056444 |
| 0.0029632 | 0.0054173 | 0.0034927 | 0.0025205 | 0.0132222 | 0.0074619 | 0.0036894 | 0.0054856 | 0.0074092 | 0.0072037 | 0.0024549 | 0.0046849 | 0.0035998 |
| 0.003271  | 0.0047255 | 0.0045152 | 0.0025222 | 0.0153445 | 0.0058724 | 0.0047877 | 0.0060767 | 0.0055272 | 0.0038272 | 0.0035719 | 0.0039431 | 0.0058263 |
| 0.0034996 | 0.012228  | 0.0048266 | 0.0026512 | 0.0044682 | 0.0054026 | 0.0024998 | 0.0101898 | 0.0049901 | 0.004979  | 0.0032436 | 0.0073349 | 0.0053916 |
| 0.0038674 | 0.0109082 | 0.0044076 | 0.0021037 | 0.0043697 | 0.0065291 | 0.0036131 | 0.0073009 | 0.0053768 | 0.00278   | 0.0020157 | 0.0045656 | 0.0037186 |
| 0.0027949 | 0.0172394 | 0.0017021 | 0.0018026 | 0.0027622 | 0.0076738 | 0.0037522 | 0.0062282 | 0.0042921 | 0.0025329 | 0.0036722 | 0.0032764 | 0.0032859 |
| 0.0027431 | 0.0076653 | 0.0027169 | 0.0025408 | 0.0061215 | 0.0085432 | 0.0039466 | 0.0044612 | 0.0068937 | 0.0035296 | 0.002607  | 0.0022678 | 0.0043456 |

|           |           |           |           |           |           |           |           |           |           |           |           |           |
|-----------|-----------|-----------|-----------|-----------|-----------|-----------|-----------|-----------|-----------|-----------|-----------|-----------|
| 0.0032018 | 0.002521  | 0.002868  | 0.0012121 | 0.0060265 | 0.0074402 | 0.0037636 | 0.0048981 | 0.0068863 | 0.0034617 | 0.0027643 | 0.0024044 | 0.0042441 |
| 0.0014447 | 0.0085576 | 0.0025488 | 0.0025377 | 0.0049611 | 0.0101133 | 0.0024577 | 0.0048577 | 0.0042956 | 0.003707  | 0.0038135 | 0.0041089 | 0.0051968 |
| 0.0033202 | 0.0030297 | 0.0030997 | 0.0024996 | 0.0046524 | 0.0077281 | 0.0018525 | 0.0069309 | 0.0036004 | 0.005398  | 0.0028043 | 0.004194  | 0.0045288 |
| 0.0050933 | 0.0032673 | 0.00188   | 0.0035393 | 0.0095205 | 0.0066897 | 0.005436  | 0.0036204 | 0.0036295 | 0.0099223 | 0.0104961 | 0.0043611 | 0.0084221 |
| 0.0043724 | 0.0087464 | 0.0019749 | 0.0031436 | 0.0096712 | 0.0069314 | 0.0062901 | 0.0036575 | 0.0035991 | 0.0094188 | 0.0101752 | 0.0037032 | 0.0089528 |
| 0.0032772 | 0.0131611 | 0.0031938 | 0.0018748 | 0.0032545 | 0.0032022 | 0.003749  | 0.0039948 | 0.0028977 | 0.004234  | 0.0099012 | 0.0066971 | 0.0107518 |
| 0.002744  | 0.005223  | 0.0027674 | 0.003229  | 0.0104756 | 0.0044664 | 0.0064192 | 0.0036831 | 0.0034691 | 0.0066418 | 0.0058605 | 0.0065461 | 0.0114703 |
| 0.0021577 | 0.0080129 | 0.0033427 | 0.0035129 | 0.0104121 | 0.0046605 | 0.0070712 | 0.0034874 | 0.0033641 | 0.0068643 | 0.0059057 | 0.0062212 | 0.01199   |
| 0.0028086 | 0.0030187 | 0.0026632 | 0.003173  | 0.0043611 | 0.0033324 | 0.0077819 | 0.0049055 | 0.003125  | 0.0049127 | 0.013737  | 0.0053564 | 0.0176965 |
| 0.0021898 | 0.010616  | 0.0025566 | 0.0026767 | 0.0042672 | 0.0034294 | 0.0083454 | 0.0045837 | 0.0033884 | 0.0047818 | 0.0117923 | 0.0054878 | 0.0177684 |
| 0.0020576 | 0.0071379 | 0.0032682 | 0.0045713 | 0.0074416 | 0.0081112 | 0.0063959 | 0.0044024 | 0.0057294 | 0.0059983 | 0.0033612 | 0.0054389 | 0.0110402 |
| 0.0018735 | 0.0056791 | 0.0033187 | 0.002954  | 0.0021545 | 0.0061728 | 0.004856  | 0.005737  | 0.0047273 | 0.0039631 | 0.0043395 | 0.0070068 | 0.0111622 |
| 0.0038838 | 0.0032884 | 0.0025429 | 0.0023347 | 0.0042199 | 0.0103175 | 0.0073257 | 0.0050115 | 0.0044833 | 0.0057869 | 0.0030576 | 0.0037226 | 0.0098325 |
| 0.002985  | 0.0024242 | 0.0031712 | 0.0023812 | 0.0082548 | 0.0020243 | 0.0049333 | 0.0053388 | 0.0027929 | 0.0033822 | 0.0205062 | 0.0049546 | 0.0365134 |
| 0.0016067 | 0.0020705 | 0.002722  | 0.002591  | 0.0019972 | 0.0042631 | 0.0043928 | 0.0056986 | 0.0030308 | 0.0057594 | 0.0150845 | 0.0069657 | 0.0128493 |
| 0.0029652 | 0.0019103 | 0.0024101 | 0.0029835 | 0.0057957 | 0.003898  | 0.0069966 | 0.0052709 | 0.0027621 | 0.0091238 | 0.0468864 | 0.0044319 | 0.0078791 |
| 0.0032912 | 0.0036534 | 0.0026012 | 0.002469  | 0.0061983 | 0.0046939 | 0.0070356 | 0.0053122 | 0.0023753 | 0.0102097 | 0.0464427 | 0.0047808 | 0.0070264 |
| 0.0027015 | 0.0043257 | 0.0029424 | 0.004165  | 0.0254113 | 0.0027925 | 0.0024484 | 0.0029949 | 0.003888  | 0.0186067 | 0.0039375 | 0.003465  | 0.0088161 |
| 0.0027147 | 0.0091928 | 0.0027726 | 0.0041546 | 0.0261938 | 0.0030115 | 0.0034185 | 0.0030734 | 0.0040265 | 0.0188635 | 0.003717  | 0.0030448 | 0.007513  |
| 0.0041202 | 0.0067018 | 0.0030458 | 0.0039368 | 0.0028208 | 0.0044493 | 0.0046427 | 0.0027984 | 0.0050124 | 0.01244   | 0.0026417 | 0.0032557 | 0.0109435 |
| 0.0041647 | 0.0041173 | 0.0024754 | 0.0056588 | 0.0067786 | 0.0048541 | 0.0061498 | 0.003345  | 0.0061293 | 0.0105474 | 0.0035955 | 0.004038  | 0.0090252 |
| 0.0040728 | 0.0104484 | 0.0025688 | 0.0051202 | 0.0069186 | 0.0054606 | 0.0065724 | 0.0035462 | 0.00551   | 0.0107923 | 0.0037868 | 0.0039353 | 0.0080314 |
| 0.0034773 | 0.0038565 | 0.0035406 | 0.0034692 | 0.0030808 | 0.0036256 | 0.0038119 | 0.0050463 | 0.0035149 | 0.0080161 | 0.0059895 | 0.0048968 | 0.0116892 |
| 0.0036645 | 0.0141785 | 0.0034531 | 0.0031856 | 0.003266  | 0.0038923 | 0.0040764 | 0.0049776 | 0.0032528 | 0.0079676 | 0.0058431 | 0.0051028 | 0.0104147 |
| 0.0053547 | 0.0013902 | 0.0053562 | 0.0042377 | 0.010429  | 0.0093993 | 0.0067515 | 0.0055074 | 0.0070734 | 0.0049798 | 0.0032245 | 0.0026855 | 0.0046728 |
| 0.0051073 | 0.0017553 | 0.0045859 | 0.0073218 | 0.017277  | 0.0111864 | 0.0068559 | 0.0036203 | 0.0060914 | 0.0113417 | 0.0016386 | 0.0025692 | 0.0032674 |
| 0.007066  | 0.0016154 | 0.0046171 | 0.0072574 | 0.0046341 | 0.0112212 | 0.0056934 | 0.0046602 | 0.0064703 | 0.0090799 | 0.0021312 | 0.003649  | 0.0035923 |
| 0.0078155 | 0.0017028 | 0.0048665 | 0.0111629 | 0.0039173 | 0.0092825 | 0.0052083 | 0.0043631 | 0.0064206 | 0.0062204 | 0.0022971 | 0.0037238 | 0.0026778 |
| 0.0036852 | 0.0047744 | 0.0024375 | 0.0044246 | 0.0113845 | 0.0063315 | 0.0033385 | 0.0049454 | 0.0053421 | 0.0073253 | 0.0049421 | 0.0027476 | 0.0057033 |
| 0.0043991 | 0.0038865 | 0.0035091 | 0.0058654 | 0.0107839 | 0.0107911 | 0.0067798 | 0.0047176 | 0.0008406 | 0.007515  | 0.0052681 | 0.0031514 | 0.0078706 |
| 0.0045879 | 0.0044421 | 0.0036163 | 0.0063912 | 0.0081372 | 0.0080324 | 0.0087972 | 0.0037464 | 0.0058919 | 0.0067984 | 0.0042558 | 0.0034643 | 0.0095824 |
| 0.0054371 | 0.0033421 | 0.004217  | 0.0084861 | 0.0071859 | 0.013842  | 0.0080114 | 0.0043157 | 0.0058612 | 0.0061895 | 0.0025139 | 0.0019981 | 0.0058103 |
| 0.003077  | 0.0044816 | 0.0019819 | 0.0055421 | 0.0052283 | 0.004076  | 0.0042354 | 0.0053247 | 0.0082063 | 0.004418  | 0.0034024 | 0.0041412 | 0.0069195 |
| 0.0029295 | 0.0050763 | 0.0022802 | 0.00745   | 0.0039682 | 0.0039636 | 0.0052883 | 0.0051286 | 0.0073903 | 0.003398  | 0.0030857 | 0.0042835 | 0.0078028 |
| 0.0036007 | 0.0024051 | 0.001907  | 0.0085939 | 0.0033719 | 0.0025948 | 0.0051654 | 0.0048004 | 0.0063464 | 0.0031916 | 0.0026041 | 0.0048251 | 0.0085517 |
| 0.0020327 | 0.0028446 | 0.0018743 | 0.008157  | 0.0157197 | 0.0056673 | 0.0040362 | 0.0041015 | 0.0074855 | 0.0045611 | 0.0018713 | 0.0031467 | 0.006865  |
| 0.0029335 | 0.0037552 | 0.003214  | 0.0066813 | 0.0085503 | 0.0097748 | 0.0054761 | 0.0029495 | 0.0074944 | 0.004867  | 0.0016025 | 0.002023  | 0.0055478 |
| 0.0033231 | 0.0028272 | 0.002653  | 0.0057905 | 0.0026674 | 0.0093327 | 0.0125151 | 0.0044641 | 0.0074773 | 0.0040823 | 0.0023561 | 0.0029486 | 0.0107481 |
| 0.0044445 | 0.0021202 | 0.0026881 | 0.0033756 | 0.0091757 | 0.0067555 | 0.0056215 | 0.0044446 | 0.0063514 | 0.0032828 | 0.0020719 | 0.002142  | 0.0042241 |
| 0.002811  | 0.0017915 | 0.0017938 | 0.0020885 | 0.008814  | 0.0066439 | 0.0023246 | 0.0049786 | 0.0068909 | 0.0047604 | 0.0174992 | 0.0030479 | 0.0059033 |
| 0.0075508 | 0.0026259 | 0.0031555 | 0.0019225 | 0.0068573 | 0.0047194 | 0.0089425 | 0.0050722 | 0.0025189 | 0.0027803 | 0.0084346 | 0.0021723 | 0.0027769 |
| 0.0090691 | 0.0027845 | 0.0146169 | 0.0042351 | 0.004628  | 0.0037329 | 0.0040189 | 0.0030029 | 0.0029113 | 0.0032052 | 0.0075876 | 0.006948  | 0.008417  |
| 0.0040847 | 0.0034334 | 0.0158767 | 0.0035402 | 0.0010456 | 0.0046934 | 0.0039071 | 0.0039463 | 0.0030393 | 0.0005412 | 0.0024166 | 0.0061521 | 0.001161  |
| 0.0034402 | 0.0081552 | 0.0181604 | 0.0062161 | 0.0007688 | 0.0029704 | 0.0028797 | 0.0027429 | 0.002393  | 0.0031284 | 0.0009761 | 0.0042596 | 0.0064559 |
| 0.0061914 | 0.0073071 | 0.0067038 | 0.0074438 | 0.0005368 | 0.0029993 | 0.0064426 | 0.0051095 | 0.0040557 | 0.0008483 | 0.0023635 | 0.0095754 | 0.0018395 |
| 0.0106416 | 0.005802  | 0.0089046 | 0.0086375 | 0.0004992 | 0.0065047 | 0.0040033 | 0.007223  | 0.0024976 | 0.0006727 | 0.0009515 | 0.0099894 | 0.0025064 |
| 0.007467  | 0.0065008 | 0.0078545 | 0.0050404 | 0.0024993 | 0.0056478 | 0.0035302 | 0.0039573 | 0.0041851 | 0.0008866 | 0.002522  | 0.0050905 | 0.0030185 |
| 0.0083265 | 0.0063892 | 0.0117064 | 0.0066636 | 0.003308  | 0.0037119 | 0.0017999 | 0.004231  | 0.0042056 | 0.0020348 | 0.002261  | 0.0052016 | 0.0019223 |
| 0.0135766 | 0.0071887 | 0.0188922 | 0.0062743 | 0.0034289 | 0.0039121 | 0.0025216 | 0.0026668 | 0.0065383 | 0.002186  | 0.0020727 | 0.0056751 | 0.0022171 |
| 0.0181119 | 0.0059034 | 0.0138645 | 0.0053658 | 0.0021676 | 0.0038756 | 0.0048333 | 0.0043219 | 0.0044759 | 0.0013981 | 0.0035621 | 0.0046902 | 0.004592  |
| 0.0057482 | 0.0057113 | 0.0171049 | 0.0040317 | 0.0019418 | 0.0046271 | 0.0047157 | 0.003823  | 0.0035911 | 0.0012778 | 0.0033425 | 0.0063705 | 0.0039277 |
| 0.0032325 | 0.0017953 | 0.0032054 | 0.0016664 | 0.0044431 | 0.0020761 | 0.0011795 | 0.0022432 | 0.0042508 | 0.0038505 | 0.0044984 | 0.0031275 | 0.0008646 |
| 0.0028574 | 0.0012142 | 0.0030079 | 0.0015452 | 0.0034269 | 0.0025861 | 0.0010665 | 0.0023651 | 0.0036319 | 0.002885  | 0.0039729 | 0.0027383 | 0.0007288 |
| 0.0030765 | 0.0011161 | 0.0030336 | 0.0013934 | 0.0036603 | 0.0029961 | 0.0009918 | 0.0024461 | 0.0044965 | 0.0029257 | 0.0044299 | 0.003084  | 0.0007116 |
| 0.003097  | 0.0014456 | 0.0034878 | 0.0018385 | 0.004246  | 0.0029971 | 0.0013367 | 0.0028911 | 0.0037377 | 0.0068495 | 0.0033322 | 0.0030995 | 0.0009318 |
| 0.0025647 | 0.0010567 | 0.0033271 | 0.0016462 | 0.0042741 | 0.0030124 | 0.0011966 | 0.0026629 | 0.0033865 | 0.0030537 | 0.005595  | 0.0029144 | 0.0007447 |
| 0.0037039 | 0.0015928 | 0.0041095 | 0.0017066 | 0.0051875 | 0.0028331 | 0.0013219 | 0.0026024 | 0.003475  | 0.0036716 | 0.0058622 | 0.00256   | 0.000823  |
| 0.00272   | 0.0025252 | 0.0048925 | 0.002013  | 0.0064897 | 0.002368  | 0.001434  | 0.0020605 | 0.0035719 | 0.0059653 | 0.0033415 | 0.0026805 | 0.0013605 |

|           |           |           |           |           |           |           |           |           |           |           |           |           |
|-----------|-----------|-----------|-----------|-----------|-----------|-----------|-----------|-----------|-----------|-----------|-----------|-----------|
| 0.0036625 | 0.0026448 | 0.0059197 | 0.0017658 | 0.0085425 | 0.0020915 | 0.0014815 | 0.0022618 | 0.0024924 | 0.0092398 | 0.0043036 | 0.0026698 | 0.0011158 |
| 0.00347   | 0.0030002 | 0.0058657 | 0.0019634 | 0.0091396 | 0.0022998 | 0.0010937 | 0.0024578 | 0.0026881 | 0.0089742 | 0.0040442 | 0.0024573 | 0.0011464 |
| 0.0045063 | 0.0016478 | 0.0079013 | 0.0024085 | 0.0052095 | 0.0036913 | 0.0010872 | 0.0022155 | 0.0032069 | 0.0043634 | 0.0043785 | 0.002635  | 0.0011998 |
| 0.0033018 | 0.0018508 | 0.0057152 | 0.0020499 | 0.0095823 | 0.0024841 | 0.0013141 | 0.0019894 | 0.0024463 | 0.0107283 | 0.0040321 | 0.0038449 | 0.0012882 |
| 0.0036912 | 0.0018605 | 0.006637  | 0.0023771 | 0.0088384 | 0.0023259 | 0.0015805 | 0.0020482 | 0.002216  | 0.0098294 | 0.0039658 | 0.0027064 | 0.0012598 |
| 0.0030603 | 0.0018477 | 0.0059751 | 0.0022846 | 0.006838  | 0.0026301 | 0.0014333 | 0.0019704 | 0.0029733 | 0.0067302 | 0.0035192 | 0.002898  | 0.0011524 |
| 0.003386  | 0.0015951 | 0.0074805 | 0.0024329 | 0.0086505 | 0.0028027 | 0.0016939 | 0.0023448 | 0.0020667 | 0.0125493 | 0.0048694 | 0.0028564 | 0.001191  |
| 0.0034941 | 0.0013504 | 0.0064654 | 0.0019992 | 0.0073223 | 0.0026817 | 0.0015716 | 0.0021442 | 0.0021482 | 0.0095869 | 0.0040262 | 0.0029427 | 0.0011706 |
| 0.0032558 | 0.0012867 | 0.0074866 | 0.0024447 | 0.0072809 | 0.0029441 | 0.0018826 | 0.0019252 | 0.0024426 | 0.0080187 | 0.0036445 | 0.0032333 | 0.0010161 |
| 0.0033071 | 0.0011407 | 0.0054867 | 0.0066122 | 0.0059173 | 0.0026878 | 0.002063  | 0.0017217 | 0.0021281 | 0.0061972 | 0.0040819 | 0.0032166 | 0.0010734 |
| 0.0035468 | 0.0010089 | 0.0076491 | 0.0021965 | 0.0025352 | 0.0037495 | 0.0021473 | 0.0023344 | 0.002594  | 0.0041321 | 0.0033196 | 0.0044604 | 0.0010466 |
| 0.0036286 | 0.0008801 | 0.008825  | 0.0028205 | 0.0026624 | 0.0036891 | 0.0020403 | 0.0020864 | 0.0027965 | 0.002598  | 0.0036674 | 0.0044361 | 0.0011991 |
| 0.003425  | 0.0009116 | 0.0070585 | 0.002975  | 0.0055874 | 0.0035656 | 0.0027067 | 0.0024425 | 0.0026669 | 0.010437  | 0.0029005 | 0.0038543 | 0.0009209 |
| 0.0031793 | 0.0010044 | 0.0061498 | 0.0026961 | 0.0047557 | 0.0037963 | 0.0012628 | 0.0025212 | 0.0028219 | 0.006475  | 0.0031416 | 0.0066756 | 0.0013057 |
| 0.0025802 | 0.0007445 | 0.0049852 | 0.0034921 | 0.00182   | 0.0046592 | 0.0041468 | 0.0055118 | 0.0043034 | 0.000747  | 0.0033445 | 0.0044243 | 0.0006626 |
| 0.0022853 | 0.0011343 | 0.0033145 | 0.0022597 | 0.0006117 | 0.0031041 | 0.00362   | 0.0059421 | 0.0052145 | 0.0005467 | 0.0036261 | 0.0040235 | 0.0013682 |
| 0.0029745 | 0.0006691 | 0.0034342 | 0.0016333 | 0.0003945 | 0.0033213 | 0.0033629 | 0.0042371 | 0.0041332 | 0.0023132 | 0.009643  | 0.0040923 | 0.0024034 |
| 0.0027102 | 0.0013191 | 0.0047243 | 0.0016073 | 0.0024927 | 0.0030615 | 0.0016898 | 0.0020856 | 0.003071  | 0.0026154 | 0.0046157 | 0.0029465 | 0.0015614 |
| 0.001962  | 0.0014564 | 0.0023313 | 0.0012746 | 0.0022179 | 0.002553  | 0.0013698 | 0.002625  | 0.0032869 | 0.0021141 | 0.008102  | 0.0027931 | 0.0009363 |
| 0.0026732 | 0.0011659 | 0.0031143 | 0.0018523 | 0.0030781 | 0.0022543 | 0.0026066 | 0.0027398 | 0.0038488 | 0.0027236 | 0.0048087 | 0.0022584 | 0.0016898 |
| 0.0021157 | 0.0017227 | 0.0034267 | 0.0012053 | 0.003198  | 0.0019224 | 0.0015608 | 0.0025272 | 0.0030733 | 0.0030697 | 0.0057147 | 0.0025    | 0.001495  |
| 0.0028997 | 0.0015575 | 0.0026684 | 0.0013701 | 0.0030134 | 0.0020692 | 0.0027328 | 0.0020146 | 0.0027208 | 0.0026694 | 0.0022928 | 0.0022762 | 0.0027707 |
| 0.0019375 | 0.0014041 | 0.000841  | 0.0023096 | 0.0020207 | 0.0029587 | 0.0017204 | 0.0017197 | 0.0021233 | 0.001463  | 0.0034612 | 0.0030496 | 0.0024524 |
| 0.0014346 | 0.0009333 | 0.0018628 | 0.0015791 | 0.0012743 | 0.0023513 | 0.0011758 | 0.0020575 | 0.0020411 | 0.0011722 | 0.0039244 | 0.0021888 | 0.0016978 |
| 0.0017662 | 0.001999  | 0.0017508 | 0.0010547 | 0.0010015 | 0.0021449 | 0.0012671 | 0.0028644 | 0.0031632 | 0.0013996 | 0.0076565 | 0.0038237 | 0.001676  |
| 0.0021106 | 0.0010952 | 0.0024522 | 0.0014646 | 0.0020092 | 0.0027346 | 0.0021382 | 0.0023605 | 0.0037366 | 0.0015621 | 0.0070862 | 0.002573  | 0.0014675 |
| 0.0022717 | 0.0008193 | 0.0032507 | 0.0014734 | 0.001357  | 0.0038171 | 0.0026986 | 0.0032329 | 0.0029175 | 0.0016204 | 0.0063189 | 0.0029401 | 0.0016826 |
| 0.0021628 | 0.0017898 | 0.0019612 | 0.0005836 | 0.0027924 | 0.0017637 | 0.0013444 | 0.0033461 | 0.0028074 | 0.0026563 | 0.0065017 | 0.0032323 | 0.0021832 |
| 0.0022774 | 0.0009779 | 0.0022778 | 0.0012137 | 0.0025956 | 0.003023  | 0.0011893 | 0.0029831 | 0.0031985 | 0.0020828 | 0.0074266 | 0.0033638 | 0.0008259 |
| 0.002617  | 0.0014086 | 0.0025246 | 0.0013414 | 0.0031731 | 0.0022615 | 0.0016102 | 0.002684  | 0.0033901 | 0.0029015 | 0.0079158 | 0.0033967 | 0.0010598 |
| 0.0030172 | 0.0011939 | 0.0018621 | 0.001531  | 0.002183  | 0.0034716 | 0.001335  | 0.0033155 | 0.0034447 | 0.0019617 | 0.0073369 | 0.0035502 | 0.0011248 |
| 0.0020768 | 0.0015264 | 0.0018599 | 0.0019104 | 0.0018299 | 0.0031906 | 0.0022852 | 0.0032967 | 0.0020599 | 0.002584  | 0.0053229 | 0.0038241 | 0.001313  |
| 0.0037162 | 0.0010164 | 0.0018246 | 0.0015891 | 0.0055888 | 0.003107  | 0.0080474 | 0.0034588 | 0.0020311 | 0.0019325 | 0.0069694 | 0.0015347 | 0.0025118 |
| 0.0037195 | 0.0010259 | 0.0018246 | 0.0015889 | 0.0055959 | 0.0031085 | 0.0080572 | 0.0034613 | 0.0019764 | 0.0019334 | 0.0069778 | 0.0015345 | 0.0025129 |
| 0.0040074 | 0.0018463 | 0.0019079 | 0.0020467 | 0.004584  | 0.0025392 | 0.006398  | 0.0034899 | 0.0020913 | 0.0020452 | 0.0052192 | 0.0015275 | 0.0018548 |
| 0.0035655 | 0.0007236 | 0.002057  | 0.0018412 | 0.0042933 | 0.0028537 | 0.0067611 | 0.0036661 | 0.0023255 | 0.0020002 | 0.0051152 | 0.0016508 | 0.0020016 |
| 0.003569  | 0.0007234 | 0.0020562 | 0.0018406 | 0.0042973 | 0.0028561 | 0.0067652 | 0.0036701 | 0.0023254 | 0.0020003 | 0.0051133 | 0.0016503 | 0.002001  |
| 0.0030049 | 0.0011444 | 0.0017376 | 0.0018279 | 0.0033503 | 0.0022422 | 0.0049222 | 0.0027568 | 0.0032957 | 0.0025868 | 0.0028706 | 0.0017323 | 0.0017118 |
| 0.0030165 | 0.0011666 | 0.0017333 | 0.0018676 | 0.0033786 | 0.0022056 | 0.0049593 | 0.0028975 | 0.0033092 | 0.0026024 | 0.0028833 | 0.0017667 | 0.0017747 |
| 0.003826  | 0.0009495 | 0.0018984 | 0.0022073 | 0.0050366 | 0.0024222 | 0.0063601 | 0.0034986 | 0.0028564 | 0.0023283 | 0.0038581 | 0.0017898 | 0.0021889 |
| 0.0033852 | 0.0011107 | 0.0018123 | 0.0020065 | 0.0042223 | 0.0024753 | 0.0058587 | 0.003554  | 0.002694  | 0.0022423 | 0.0032412 | 0.0017268 | 0.0018637 |
| 0.0029809 | 0.0009878 | 0.0020422 | 0.0019814 | 0.0049528 | 0.0022451 | 0.0069691 | 0.0033512 | 0.0034103 | 0.0023671 | 0.003774  | 0.0018254 | 0.0028198 |
| 0.0035439 | 0.0013266 | 0.0018446 | 0.0020469 | 0.0021923 | 0.0027369 | 0.0048621 | 0.003485  | 0.002987  | 0.0028304 | 0.0054617 | 0.0019701 | 0.0024933 |
| 0.0027548 | 0.0014756 | 0.0020571 | 0.0013422 | 0.0039251 | 0.0020044 | 0.0033257 | 0.0029617 | 0.0043722 | 0.0028404 | 0.0072559 | 0.0020261 | 0.0014149 |
| 0.0031543 | 0.0014592 | 0.0020774 | 0.0014101 | 0.0045693 | 0.0021425 | 0.0027912 | 0.002931  | 0.0040218 | 0.003128  | 0.006634  | 0.0018276 | 0.0013309 |
| 0.0028763 | 0.0015001 | 0.0022542 | 0.0009688 | 0.0041339 | 0.0024026 | 0.0030134 | 0.0030742 | 0.0043012 | 0.0031742 | 0.0071495 | 0.0020515 | 0.0014656 |
| 0.0029003 | 0.0014994 | 0.0022205 | 0.0011178 | 0.004154  | 0.002392  | 0.0030023 | 0.0030353 | 0.00431   | 0.0032111 | 0.0072325 | 0.0020668 | 0.0014772 |
| 0.005032  | 0.007846  | 0.0033772 | 0.0023991 | 0.0034339 | 0.0013824 | 0.0008709 | 0.0034974 | 0.0045603 | 0.0011163 | 0.0003834 | 0.0036267 | 0.0014188 |
| 0.0059918 | 0.0044571 | 0.005218  | 0.0038176 | 0.0027866 | 0.0020466 | 0.0014778 | 0.003599  | 0.0023892 | 0.0007564 | 0.0001225 | 0.0043652 | 0.0015666 |
| 0.0059897 | 0.0044594 | 0.005221  | 0.0038186 | 0.0027875 | 0.0020478 | 0.0014808 | 0.003603  | 0.0023889 | 0.0007572 | 0.0001231 | 0.0043688 | 0.0015676 |
| 0.0059729 | 0.0016574 | 0.0036033 | 0.0031968 | 0.0020177 | 0.0036886 | 0.0032448 | 0.0023162 | 0.0048898 | 0.0006319 | 0.0003298 | 0.0022255 | 0.0010462 |
| 0.0043541 | 0.0018364 | 0.002944  | 0.0028413 | 0.0022457 | 0.00356   | 0.0040712 | 0.0022049 | 0.0049587 | 0.0005981 | 0.0002829 | 0.0022811 | 0.0009496 |
| 0.0044561 | 0.001683  | 0.0024512 | 0.0031119 | 0.0025822 | 0.0037142 | 0.0040082 | 0.0019711 | 0.0045903 | 0.0011105 | 0.0008373 | 0.0018851 | 0.0009173 |
| 0.0029317 | 0.0008232 | 0.0031785 | 0.0020631 | 0.0028475 | 0.0020765 | 0.0028714 | 0.0037064 | 0.0052519 | 0.00337   | 0.0020935 | 0.0019266 | 0.0013387 |
| 0.0047942 | 0.0014618 | 0.0027142 | 0.0027924 | 0.0028223 | 0.0034474 | 0.0039443 | 0.0029024 | 0.0054896 | 0.0028746 | 0.0012124 | 0.0019779 | 0.0019005 |
| 0.0046711 | 0.0017761 | 0.0029807 | 0.0024814 | 0.0029518 | 0.0036554 | 0.0039047 | 0.0027425 | 0.0051635 | 0.0028287 | 0.0015337 | 0.0020258 | 0.001834  |
| 0.0035294 | 0.0011839 | 0.0025463 | 0.0023168 | 0.0025615 | 0.0031813 | 0.0042699 | 0.0026367 | 0.0036301 | 0.0014117 | 0.0010096 | 0.001864  | 0.0019238 |
| 0.0035124 | 0.0011921 | 0.0025003 | 0.0022278 | 0.0024121 | 0.0030011 | 0.0042463 | 0.0026137 | 0.0039305 | 0.0014909 | 0.0010049 | 0.0017854 | 0.0018752 |

|           |           |           |           |           |           |           |           |           |           |           |           |           |
|-----------|-----------|-----------|-----------|-----------|-----------|-----------|-----------|-----------|-----------|-----------|-----------|-----------|
| 0.0047165 | 0.0014258 | 0.0025954 | 0.0024826 | 0.0030028 | 0.0031905 | 0.0030419 | 0.0025297 | 0.0021363 | 0.001634  | 0.0008588 | 0.0018565 | 0.0010242 |
| 0.0039576 | 0.001293  | 0.0025812 | 0.0023594 | 0.0030262 | 0.0032333 | 0.0037355 | 0.0027418 | 0.0023939 | 0.0015962 | 0.000796  | 0.0017983 | 0.0012688 |
| 0.0003931 | 0.0009796 | 0.0015891 | 0.0036856 | 0.0004313 | 0.0049739 | 0.0030254 | 0.0038474 | 0.0033204 | 0.0007525 | 0.0016738 | 0.0051717 | 0.0032493 |
| 0.003535  | 0.0020169 | 0.0017968 | 0.0033116 | 0.0001299 | 0.0023041 | 0.0014117 | 0.00286   | 0.0030991 | 0.0006479 | 0.0018556 | 0.0053299 | 0.003072  |
| 0.0030392 | 0.0020628 | 0.0038596 | 0.0032982 | 0.0002538 | 0.0042735 | 0.0024945 | 0.0039034 | 0.0034629 | 0.0020792 | 0.0049313 | 0.0046267 | 0.0030133 |
| 0.0033862 | 0.000941  | 0.0065042 | 0.0024218 | 0.000505  | 0.0054823 | 0.0023985 | 0.0028464 | 0.0027373 | 0.0011994 | 0.0025789 | 0.0067564 | 0.0010268 |
| 0.0032575 | 0.000582  | 0.0076371 | 0.003927  | 0.0006694 | 0.0039249 | 0.0034595 | 0.003515  | 0.0025865 | 0.001331  | 0.0021342 | 0.0055446 | 0.0009072 |
| 0.0013288 | 0.0008348 | 0.0030922 | 0.0010039 | 0.0009186 | 0.0036053 | 0.0039828 | 0.0024722 | 0.0042476 | 0.0028208 | 0.0033592 | 0.003287  | 0.0012526 |
| 0.0023876 | 0.0007234 | 0.0038532 | 0.002103  | 0.0008921 | 0.0046258 | 0.0024319 | 0.002924  | 0.0033761 | 0.0015808 | 0.0041954 | 0.0042609 | 0.0020332 |
| 0.0032354 | 0.0005739 | 0.0053554 | 0.0028999 | 0.0007913 | 0.0050101 | 0.00304   | 0.0031531 | 0.0022178 | 0.001343  | 0.0027504 | 0.005297  | 0.0015089 |
| 0.0016457 | 0.0031229 | 0.0017522 | 0.0008407 | 0.000896  | 0.0016442 | 0.0014111 | 0.0037978 | 0.0023596 | 0.0017019 | 0.0033944 | 0.0049103 | 0.0033274 |
| 0.0027829 | 0.0015505 | 0.0026639 | 0.001537  | 0.0047519 | 0.0017907 | 0.0013694 | 0.0016921 | 0.0035343 | 0.0035755 | 0.0018326 | 0.0033001 | 0.0018307 |
| 0.0021389 | 0.0018274 | 0.0017905 | 0.0013917 | 0.0030631 | 0.0017732 | 0.0015086 | 0.002719  | 0.0032676 | 0.0026713 | 0.0025147 | 0.0038784 | 0.0011303 |
| 0.0026717 | 0.0023889 | 0.0022342 | 0.0015344 | 0.0035342 | 0.0020538 | 0.0011533 | 0.002909  | 0.0036422 | 0.0031081 | 0.0015035 | 0.0033708 | 0.0008396 |
| 0.0022425 | 0.0014744 | 0.0038236 | 0.0032614 | 0.0012899 | 0.0025375 | 0.0025246 | 0.0027906 | 0.0027752 | 0.0025312 | 0.0019443 | 0.0028065 | 0.0024201 |
| 0.002377  | 0.0012088 | 0.0023374 | 0.0019089 | 0.001706  | 0.0027701 | 0.001313  | 0.0020219 | 0.0032886 | 0.0016391 | 0.0010726 | 0.002798  | 0.0014075 |
| 0.0025816 | 0.0011026 | 0.002778  | 0.0023896 | 0.0016264 | 0.0032312 | 0.0011782 | 0.0022532 | 0.0036062 | 0.0018159 | 0.0008978 | 0.0035334 | 0.0013089 |
| 0.002334  | 0.0013012 | 0.0019541 | 0.0019214 | 0.0014593 | 0.0027182 | 0.0013231 | 0.0024291 | 0.0035134 | 0.0016843 | 0.0014548 | 0.0026273 | 0.0026862 |
| 0.0028335 | 0.0011763 | 0.0023323 | 0.0026357 | 0.0014831 | 0.0030837 | 0.0015789 | 0.0026147 | 0.0037722 | 0.0013983 | 0.0014533 | 0.0030126 | 0.0021754 |
| 0.0024144 | 0.0013521 | 0.0022577 | 0.0015513 | 0.0030916 | 0.0018274 | 0.0012569 | 0.0022748 | 0.0036388 | 0.0030589 | 0.0020048 | 0.0032154 | 0.0011973 |
| 0.0024318 | 0.0013042 | 0.0024562 | 0.001616  | 0.0028658 | 0.002143  | 0.0011925 | 0.0021482 | 0.0035274 | 0.0026196 | 0.0018063 | 0.0029423 | 0.0011628 |
| 0.0023905 | 0.0011962 | 0.0022727 | 0.0017512 | 0.0025777 | 0.0022285 | 0.0013332 | 0.0020998 | 0.0034244 | 0.0023582 | 0.0014864 | 0.00299   | 0.0010777 |
| 0.0025215 | 0.0010942 | 0.0019278 | 0.0020528 | 0.0023044 | 0.0026143 | 0.0012568 | 0.0024123 | 0.0042318 | 0.0025665 | 0.0016334 | 0.0030557 | 0.0009956 |
| 0.002283  | 0.0011974 | 0.0018953 | 0.0017448 | 0.0017975 | 0.0026455 | 0.0013217 | 0.0020708 | 0.0035389 | 0.0018799 | 0.0011849 | 0.0027953 | 0.0015727 |
| 0.0024227 | 0.0012146 | 0.0020133 | 0.0016835 | 0.0021817 | 0.0023775 | 0.0013493 | 0.0021319 | 0.0034868 | 0.0021666 | 0.0013396 | 0.0030435 | 0.0013054 |
| 0.0021861 | 0.0017085 | 0.0019153 | 0.0013876 | 0.0009319 | 0.0026754 | 0.002621  | 0.0037091 | 0.0028886 | 0.0020817 | 0.0032289 | 0.0050373 | 0.0021399 |
| 0.0019788 | 0.0016108 | 0.0019968 | 0.001607  | 0.0011121 | 0.0024921 | 0.0015994 | 0.002769  | 0.0027077 | 0.0020164 | 0.0025895 | 0.0049768 | 0.0010208 |
| 0.0021912 | 0.0019963 | 0.001846  | 0.0014062 | 0.000777  | 0.0027723 | 0.0021399 | 0.003509  | 0.0024439 | 0.0022407 | 0.0051536 | 0.0063032 | 0.0010801 |
| 0.0018003 | 0.0017671 | 0.0025892 | 0.0023252 | 0.0008614 | 0.0033111 | 0.0034138 | 0.0038053 | 0.0025025 | 0.0013844 | 0.0038133 | 0.0057583 | 0.0014442 |
| 0.0019005 | 0.0014037 | 0.0026838 | 0.001406  | 0.0009986 | 0.0030272 | 0.0026148 | 0.0018009 | 0.0019228 | 0.0049579 | 0.0031879 | 0.0041144 | 0.001379  |
| 0.0018548 | 0.0014089 | 0.0013078 | 0.002522  | 0.001717  | 0.0022963 | 0.0022084 | 0.0019399 | 0.0027037 | 0.001713  | 0.00184   | 0.0047421 | 0.0021841 |
| 0.0029925 | 0.0015976 | 0.002102  | 0.0016604 | 0.0012379 | 0.0024132 | 0.003064  | 0.0040375 | 0.0022083 | 0.0020827 | 0.0019486 | 0.0023191 | 0.0040102 |
| 0.0019446 | 0.0021403 | 0.0016444 | 0.0015378 | 0.0015564 | 0.0023653 | 0.0013479 | 0.0023567 | 0.0030365 | 0.0017323 | 0.0014646 | 0.0025023 | 0.0021796 |
| 0.0020855 | 0.0015095 | 0.0015319 | 0.0016542 | 0.0012722 | 0.0026854 | 0.0017131 | 0.0029268 | 0.0035802 | 0.0016432 | 0.0018733 | 0.0025963 | 0.0046111 |
| 0.0016226 | 0.0015024 | 0.0015199 | 0.0013676 | 0.0012321 | 0.0020539 | 0.00169   | 0.0029094 | 0.0028101 | 0.0017036 | 0.0020945 | 0.0026939 | 0.0041172 |
| 0.001873  | 0.0015347 | 0.001804  | 0.001194  | 0.0012603 | 0.0024961 | 0.0014876 | 0.0032007 | 0.0030119 | 0.0017639 | 0.005646  | 0.0039107 | 0.0018132 |
| 0.0018221 | 0.0013565 | 0.002687  | 0.0011976 | 0.0013702 | 0.0027262 | 0.0024013 | 0.0028198 | 0.0025478 | 0.0021838 | 0.0031466 | 0.0032523 | 0.0020129 |
| 0.0016289 | 0.0017232 | 0.0019439 | 0.0013416 | 0.0010021 | 0.002174  | 0.001623  | 0.0031442 | 0.0023161 | 0.0017282 | 0.0030836 | 0.0034145 | 0.0030244 |
| 0.0016331 | 0.0019239 | 0.0019236 | 0.0012585 | 0.0015148 | 0.0019564 | 0.0013442 | 0.0031241 | 0.0024852 | 0.0019329 | 0.0028223 | 0.0032301 | 0.0028396 |
| 0.0017132 | 0.0016012 | 0.0018939 | 0.0013379 | 0.0017465 | 0.0029963 | 0.0020001 | 0.0030567 | 0.0024778 | 0.0017027 | 0.0030089 | 0.0035693 | 0.00256   |
| 0.0022271 | 0.001491  | 0.0017961 | 0.0015889 | 0.0020878 | 0.0023324 | 0.0015618 | 0.002625  | 0.0031356 | 0.0022887 | 0.0021931 | 0.00298   | 0.0010548 |
| 0.0021774 | 0.0017713 | 0.0018707 | 0.0009548 | 0.0019119 | 0.001853  | 0.0014084 | 0.0029997 | 0.00277   | 0.0023513 | 0.0031516 | 0.0029248 | 0.001485  |
| 0.0019377 | 0.001445  | 0.0017913 | 0.0015549 | 0.0016407 | 0.0020709 | 0.0018032 | 0.0026628 | 0.0028653 | 0.0020817 | 0.0023379 | 0.0030941 | 0.002166  |
| 0.0020894 | 0.001332  | 0.002085  | 0.0015001 | 0.0020933 | 0.0020501 | 0.0012786 | 0.002368  | 0.0031599 | 0.0022333 | 0.0021258 | 0.0031259 | 0.0016727 |
| 0.0021822 | 0.0012901 | 0.0018649 | 0.001649  | 0.0019964 | 0.0021529 | 0.0014746 | 0.0023831 | 0.0032917 | 0.0020829 | 0.0017161 | 0.0029228 | 0.0017036 |
| 0.0017977 | 0.0015492 | 0.0019679 | 0.0011719 | 0.0019707 | 0.0018998 | 0.00117   | 0.0025317 | 0.0032457 | 0.0020357 | 0.0033918 | 0.0032936 | 0.0018142 |
| 0.00178   | 0.0016499 | 0.0017873 | 0.0012549 | 0.0018088 | 0.0020749 | 0.0012558 | 0.0029171 | 0.0031321 | 0.0018015 | 0.0032772 | 0.003539  | 0.0019694 |
| 0.0020275 | 0.0017392 | 0.0027261 | 0.0036977 | 0.0021887 | 0.0037589 | 0.0024732 | 0.0012781 | 0.0034785 | 0.0020293 | 0.0008211 | 0.0037563 | 0.0016772 |
| 0.0030196 | 0.0008874 | 0.0020103 | 0.0082175 | 0.0014896 | 0.0115222 | 0.0017677 | 0.0034433 | 0.0041666 | 0.0010317 | 0.0016053 | 0.0024806 | 0.0008013 |
| 0.0018231 | 0.0012314 | 0.0014806 | 0.003044  | 0.001159  | 0.0033822 | 0.0017106 | 0.0029433 | 0.0034818 | 0.0012915 | 0.0024771 | 0.0024025 | 0.0018718 |
| 0.0019862 | 0.0010108 | 0.0015434 | 0.0038991 | 0.0012063 | 0.0044485 | 0.0017171 | 0.0035228 | 0.0039467 | 0.0013811 | 0.0026298 | 0.00216   | 0.0015341 |
| 0.0070595 | 0.0009394 | 0.0023228 | 0.0038667 | 0.0017303 | 0.0042215 | 0.0031194 | 0.0033016 | 0.0042246 | 0.00122   | 0.0013227 | 0.0042566 | 0.0019759 |
| 0.0032243 | 0.002752  | 0.0024562 | 0.0027846 | 0.0013895 | 0.0036292 | 0.0021074 | 0.0036836 | 0.00384   | 0.0018247 | 0.0014747 | 0.0029993 | 0.0035007 |
| 0.0028956 | 0.002148  | 0.0020861 | 0.0020702 | 0.0024039 | 0.0040551 | 0.002858  | 0.0039745 | 0.0018961 | 0.0023706 | 0.0038123 | 0.0020176 |           |
| 0.0021781 | 0.0019124 | 0.0025153 | 0.0026818 | 0.0041464 | 0.0017948 | 0.0019995 | 0.001427  | 0.0093987 | 0.0030189 | 0.0055812 | 0.0020391 | 0.0012838 |
| 0.002872  | 0.0011948 | 0.0023418 | 0.0042216 | 0.0024072 | 0.0030313 | 0.004563  | 0.0020544 | 0.0098312 | 0.0011664 | 0.0029269 | 0.0030953 | 0.0018241 |
| 0.0012631 | 0.0008721 | 0.0021773 | 0.0024606 | 0.002335  | 0.002575  | 0.0030748 | 0.002234  | 0.0066324 | 0.0016748 | 0.0017496 | 0.0017575 | 0.0071257 |
| 0.0020217 | 0.0006543 | 0.0028685 | 0.0055469 | 0.0011836 | 0.0023194 | 0.0070411 | 0.002794  | 0.0048546 | 0.0009287 | 0.0008353 | 0.0030398 | 0.0091669 |

|           |           |           |           |           |           |           |           |           |           |           |           |           |
|-----------|-----------|-----------|-----------|-----------|-----------|-----------|-----------|-----------|-----------|-----------|-----------|-----------|
| 0.0024348 | 0.0020178 | 0.0034044 | 0.0029715 | 0.0024315 | 0.0035463 | 0.0036895 | 0.0023669 | 0.0025953 | 4.32E-05  | 0.0054361 | 0.0041787 | 0.0036373 |
| 0.002089  | 0.0015622 | 0.0020349 | 0.0037528 | 0.0008312 | 0.0017338 | 0.0029876 | 0.0024963 | 0.0024667 | 0.0002113 | 0.0027136 | 0.0035194 | 0.0055114 |
| 0.0024351 | 0.0008618 | 0.0013322 | 0.002301  | 0.0032277 | 0.0031708 | 0.0030125 | 0.0027628 | 0.0021253 | 0.0013816 | 0.002124  | 0.0016841 | 0.0037971 |
| 0.0036009 | 0.0006977 | 0.0015146 | 0.0027931 | 0.001601  | 0.0040046 | 0.0061395 | 0.0029068 | 0.0016788 | 0.001715  | 0.0010316 | 0.0011657 | 0.0031241 |
| 0.0054684 | 0.0013063 | 0.0039938 | 0.0019443 | 0.0016123 | 0.0030759 | 0.0046647 | 0.0027098 | 0.001604  | 0.0024698 | 0.0007772 | 0.0019336 | 0.0020242 |
| 0.0019303 | 0.0011832 | 0.0029711 | 0.0018242 | 0.0012208 | 0.0036212 | 0.0022669 | 0.0024635 | 0.0020811 | 0.0011241 | 0.0018481 | 0.0024245 | 0.0020051 |
| 0.0020584 | 0.002235  | 0.0020931 | 0.0029082 | 0.0012186 | 0.0028623 | 0.0027347 | 0.0028947 | 0.0017687 | 0.0016003 | 0.0024137 | 0.0023089 | 0.0039163 |
| 0.0019395 | 0.0019874 | 0.0022942 | 0.0021565 | 0.0009226 | 0.0030761 | 0.0008608 | 0.0033967 | 0.0022221 | 0.0008926 | 0.0011637 | 0.0031786 | 0.0017936 |
| 0.0020011 | 0.0013647 | 0.0015438 | 0.0019927 | 0.000667  | 0.0014669 | 0.0027372 | 0.0028758 | 0.0011669 | 0.0010172 | 0.0017429 | 0.0023869 | 0.001982  |
| 0.0019265 | 0.001112  | 0.0015445 | 0.0019556 | 0.0008764 | 0.001463  | 0.0024081 | 0.0024599 | 0.0014115 | 0.0009471 | 0.0016722 | 0.0022253 | 0.0018449 |
| 0.003962  | 0.0014997 | 0.0039915 | 0.0041224 | 0.0007764 | 0.001925  | 0.0014876 | 0.0042513 | 0.0012015 | 0.0005752 | 0.0004192 | 0.0041994 | 0.0017906 |
| 0.0039841 | 0.001439  | 0.0029457 | 0.0050279 | 0.0011196 | 0.0028554 | 0.0039222 | 0.0033647 | 0.0006513 | 0.0005343 | 0.0010002 | 0.0020902 | 0.0017404 |
| 0.0024448 | 0.0017085 | 0.0024823 | 0.0042693 | 0.0007843 | 0.0021996 | 0.0032535 | 0.0026686 | 0.0020727 | 0.0036323 | 0.0008868 | 0.0027314 | 0.0020758 |
| 0.0028428 | 0.0012856 | 0.00366   | 0.0048728 | 0.001367  | 0.0030862 | 0.0030098 | 0.0026106 | 0.0013483 | 0.0012818 | 0.000443  | 0.0029197 | 0.0011221 |
| 0.0021675 | 0.0017791 | 0.0030295 | 0.0031305 | 0.0010095 | 0.002063  | 0.0032681 | 0.002832  | 0.0013426 | 0.0013551 | 0.0008861 | 0.0023277 | 0.0015524 |
| 0.0016461 | 0.0056201 | 0.0027474 | 0.001072  | 0.0012192 | 0.0020627 | 0.0025961 | 0.0040371 | 0.0009266 | 0.0015202 | 0.0012319 | 0.0035547 | 0.0023804 |
| 0.0025095 | 0.0013751 | 0.0029801 | 0.0031886 | 0.0006751 | 0.0025992 | 0.0017015 | 0.0042667 | 0.0014106 | 0.0019086 | 0.0027191 | 0.0028783 | 0.0021631 |
| 0.0023307 | 0.0086992 | 0.0025621 | 0.0030166 | 0.0006233 | 0.0026385 | 0.0031379 | 0.0031881 | 0.0014079 | 0.0011526 | 0.0023776 | 0.001968  | 0.0025056 |
| 0.0028728 | 0.003725  | 0.0030605 | 0.0038314 | 0.0007343 | 0.0023689 | 0.0034557 | 0.0034382 | 0.0008986 | 0.0012964 | 0.0011534 | 0.0022444 | 0.0018419 |
| 0.0027194 | 0.0016785 | 0.0023105 | 0.0014657 | 0.001779  | 0.0035066 | 0.0031739 | 0.0040323 | 0.0015313 | 0.0024501 | 0.0004467 | 0.0027237 | 0.0016628 |
| 0.0015288 | 0.0034303 | 0.0047677 | 0.003833  | 0.0022893 | 0.0051838 | 0.0019189 | 0.0037941 | 0.0011489 | 0.0016861 | 0.0001689 | 0.0059377 | 0.0068888 |
| 0.0039491 | 0.004088  | 0.0024647 | 0.002615  | 0.0012928 | 0.0056607 | 0.0006933 | 0.0082848 | 0.0026426 | 0.001737  | 0.0002125 | 0.0028543 | 0.0021733 |
| 0.0041471 | 0.0025266 | 0.0047656 | 0.007999  | 0.0007656 | 0.0026093 | 0.0014854 | 0.0026324 | 0.0016562 | 0.0003852 | 0.0001202 | 0.0073265 | 0.0013495 |
| 0.0040474 | 0.0026851 | 0.0048272 | 0.0088433 | 0.0007898 | 0.0025275 | 0.001476  | 0.0026127 | 0.0016747 | 0.0003876 | 0.0001182 | 0.0065177 | 0.0013536 |
| 0.002416  | 0.006026  | 0.0024586 | 0.0039711 | 0.0007345 | 0.0031731 | 0.0009614 | 0.0012017 | 0.0041894 | 0.0003862 | 0.0004539 | 0.0085616 | 0.0015324 |
| 0.0020331 | 0.0065392 | 0.0067586 | 0.0031995 | 0.0004143 | 0.0007512 | 0.0012221 | 0.002154  | 0.0013645 | 0.0005318 | 0.0034585 | 0.0078597 | 0.0006924 |
| 0.0011074 | 0.0039576 | 0.0063977 | 0.0017298 | 0.0004271 | 0.0010557 | 0.0010441 | 0.0016175 | 0.0038167 | 0.0008955 | 0.0018519 | 0.0076799 | 0.0021335 |
| 0.0011662 | 0.0047686 | 0.0054121 | 0.0012162 | 0.0004693 | 0.0009355 | 0.0012328 | 0.00154   | 0.0049842 | 0.0010204 | 0.0022407 | 0.0066395 | 0.0027015 |
| 0.0044146 | 0.0038977 | 0.0037876 | 0.0055499 | 0.0008849 | 0.0018691 | 0.0028793 | 0.0042283 | 0.0025279 | 0.0003267 | 0.000182  | 0.0054862 | 0.0019092 |
| 0.0047968 | 0.0040031 | 0.0061774 | 0.0056788 | 0.0026102 | 0.0023945 | 0.0003905 | 0.0030265 | 0.0037936 | 0.0011818 | 0.0004428 | 0.0052179 | 0.0012498 |
| 0.0039643 | 0.0038599 | 0.0063369 | 0.0058451 | 0.0029809 | 0.003425  | 0.0004052 | 0.0027528 | 0.00348   | 0.0010091 | 0.0004825 | 0.0061857 | 0.0011371 |
| 0.0037624 | 0.0049407 | 0.007436  | 0.0037043 | 0.0010522 | 0.0028452 | 0.0006299 | 0.0048183 | 0.0022603 | 0.0005256 | 0.0003134 | 0.0041946 | 0.0009372 |
| 0.0059484 | 0.0016708 | 0.0038479 | 0.0054485 | 0.0008792 | 0.0023838 | 0.0004747 | 0.0041876 | 0.0017324 | 0.0004458 | 0.0005071 | 0.0058308 | 0.0010447 |
| 0.0054539 | 0.0021481 | 0.0033486 | 0.0052819 | 0.0007141 | 0.0035518 | 0.0004287 | 0.0044519 | 0.0018702 | 0.0005592 | 0.0003712 | 0.0051274 | 0.0008948 |
| 0.0044857 | 0.0026061 | 0.0037422 | 0.003294  | 0.0007572 | 0.0024242 | 0.0015253 | 0.0047677 | 0.0010706 | 0.0004709 | 0.0004693 | 0.0049165 | 0.0015837 |
| 0.0044799 | 0.0030962 | 0.002296  | 0.0033333 | 0.0005142 | 0.0021268 | 0.0016806 | 0.003193  | 0.0025175 | 0.0008399 | 0.0011495 | 0.00265   | 0.0020975 |

| SP_26     | SP_27     | SP_28     | SP_29     | SP_30     | SP_31     | SPR_01    | SPR_02    | SPR_03    | SPR_04    | SPR_05    | SPR_06    | SPR_07    |
|-----------|-----------|-----------|-----------|-----------|-----------|-----------|-----------|-----------|-----------|-----------|-----------|-----------|
| 0.0016247 | 0.0069099 | 0.0093239 | 0.003082  | 0.0105347 | 0.0040633 | 0.0073269 | 0.001023  | 0.0059888 | 0.0023277 | 0.0018079 | 0.0009688 | 0.0017757 |
| 0.0024446 | 0.0036846 | 0.0012126 | 0.0041927 | 0.0061694 | 0.005571  | 0.0035686 | 0.0009864 | 0.0028307 | 0.0021143 | 0.0014432 | 0.0015469 | 0.0028141 |
| 0.006154  | 0.0064999 | 0.0029165 | 0.0129803 | 0.0094039 | 0.0091847 | 0.0012501 | 0.0055941 | 0.0053169 | 0.0033051 | 0.0063238 | 0.0013896 | 0.0020023 |
| 0.0062093 | 0.0065043 | 0.002604  | 0.0129814 | 0.0096191 | 0.0092697 | 0.0012304 | 0.0056143 | 0.0053837 | 0.0033456 | 0.0063961 | 0.0015085 | 0.0020145 |
| 0.0045944 | 0.003027  | 0.0049215 | 0.0039945 | 0.0036776 | 0.0044898 | 0.0009736 | 0.0014033 | 0.0037317 | 0.004374  | 0.0045443 | 0.0005223 | 0.00167   |
| 0.004533  | 0.0031679 | 0.0049369 | 0.003631  | 0.0034932 | 0.0037164 | 0.0009702 | 0.0012468 | 0.0028732 | 0.0040614 | 0.0053146 | 0.0004968 | 0.0017937 |
| 0.003968  | 0.0018799 | 0.0050971 | 0.0038177 | 0.0024726 | 0.0027971 | 0.0011249 | 0.0014335 | 0.0037239 | 0.0030809 | 0.0048432 | 0.0005649 | 0.0016454 |
| 0.0039291 | 0.0017382 | 0.0049972 | 0.0029434 | 0.0024848 | 0.002642  | 0.0011384 | 0.0011567 | 0.0029237 | 0.0025384 | 0.0052675 | 0.0005206 | 0.0018888 |
| 0.0072289 | 0.0050839 | 0.0031369 | 0.0023887 | 0.0053526 | 0.0028489 | 0.0009806 | 0.0124474 | 0.0024622 | 0.0010977 | 0.0032955 | 0.0009753 | 0.0018273 |
| 0.0036229 | 0.0035557 | 0.0050643 | 0.0064516 | 0.0038096 | 0.0072541 | 0.0019354 | 0.0019638 | 0.0021991 | 0.0008082 | 0.0012417 | 0.0006919 | 0.001294  |
| 0.0028737 | 0.0017019 | 0.0144254 | 0.0070844 | 0.0100745 | 0.0080702 | 0.0013426 | 0.0028679 | 0.0024936 | 0.0040142 | 0.0029275 | 0.00131   | 0.0026457 |
| 0.0030949 | 0.0015635 | 0.004315  | 0.0024525 | 0.0101467 | 0.0079083 | 0.0015076 | 0.0031317 | 0.0014819 | 0.0012308 | 0.0008639 | 0.0018036 | 0.0014761 |
| 0.0075569 | 0.0034815 | 0.0028634 | 0.0027254 | 0.0041166 | 0.0036631 | 0.0017689 | 0.0023298 | 0.0019102 | 0.0014719 | 0.0010414 | 0.0014095 | 0.0013499 |
| 0.0067504 | 0.0042206 | 0.005473  | 0.0019648 | 0.0048805 | 0.0049074 | 0.0023856 | 0.0022324 | 0.0018941 | 0.0011937 | 0.0022299 | 0.0019336 | 0.0012421 |
| 0.0087728 | 0.005005  | 0.0068509 | 0.0031433 | 0.0024168 | 0.0044853 | 0.0006724 | 0.001392  | 0.0009242 | 0.0011301 | 0.0029048 | 0.0017441 | 0.0010767 |
| 0.0078682 | 0.0011619 | 0.006164  | 0.0032566 | 0.0055831 | 0.0045242 | 0.0018981 | 0.0020086 | 0.0011855 | 0.0013968 | 0.0013445 | 0.0022799 | 0.0013506 |
| 0.0107891 | 0.0042586 | 0.0099332 | 0.0037794 | 0.0040183 | 0.0061108 | 0.0011272 | 0.0021238 | 0.0021139 | 0.0032057 | 0.0018715 | 0.0014563 | 0.0007594 |
| 0.008298  | 0.0058612 | 0.006094  | 0.0042148 | 0.0038327 | 0.0056529 | 0.0012532 | 0.0014808 | 0.0015923 | 0.0008771 | 0.0028331 | 0.0015256 | 0.0005958 |
| 0.0057717 | 0.0035761 | 0.0089855 | 0.0049162 | 0.0059138 | 0.0069809 | 0.0013134 | 0.0015228 | 0.001323  | 0.0007172 | 0.00177   | 0.0009928 | 0.0009515 |
| 0.0071929 | 0.0036468 | 0.0019792 | 0.0029254 | 0.0023232 | 0.0030682 | 0.0041852 | 0.0016532 | 0.0018748 | 0.0002733 | 0.0009122 | 0.0014213 | 0.0010807 |
| 0.0083555 | 0.0048198 | 0.0056253 | 0.0032634 | 0.0017676 | 0.0037852 | 0.0009315 | 0.0013712 | 0.0015314 | 0.0003927 | 0.0015266 | 0.0015979 | 0.0007341 |
| 0.0086018 | 0.0041979 | 0.0039054 | 0.0033275 | 0.0033798 | 0.0042212 | 0.0013443 | 0.0011489 | 0.0026085 | 0.0003754 | 0.0009708 | 0.0013431 | 0.0005631 |
| 0.0078241 | 0.0039989 | 0.0041346 | 0.0035492 | 0.003344  | 0.0041649 | 0.0013807 | 0.0011763 | 0.0027294 | 0.0003764 | 0.0009206 | 0.001302  | 0.0006626 |
| 0.0042552 | 0.0052411 | 0.008433  | 0.0035344 | 0.0039382 | 0.0046101 | 0.0006622 | 0.0010659 | 0.0013273 | 0.0013173 | 0.0023019 | 0.0016232 | 0.0006188 |
| 0.005316  | 0.0091222 | 0.0087395 | 0.0030153 | 0.0035171 | 0.0040688 | 0.0007933 | 0.0011229 | 0.0021392 | 0.0009826 | 0.0014679 | 0.0017537 | 0.0007531 |
| 0.0109673 | 0.0042072 | 0.0034427 | 0.0046085 | 0.0041127 | 0.0031997 | 0.0015124 | 0.001851  | 0.001374  | 0.0009801 | 0.0010484 | 0.0011808 | 0.0029747 |
| 0.0050072 | 0.0026113 | 0.0029483 | 0.0026923 | 0.0102396 | 0.0091407 | 0.0021176 | 0.0028765 | 0.0025247 | 0.0009994 | 0.0010622 | 0.0007291 | 0.0022095 |
| 0.017592  | 0.0017624 | 0.0061175 | 0.0028488 | 0.0045494 | 0.0033764 | 0.0017199 | 0.0034923 | 0.000851  | 0.0016338 | 0.0020838 | 0.0007155 | 0.0024649 |
| 0.0099449 | 0.0032119 | 0.0041068 | 0.0037872 | 0.0050564 | 0.0045975 | 0.0020136 | 0.0025582 | 0.0017727 | 0.0025144 | 0.0014457 | 0.0011545 | 0.0011906 |
| 0.0116356 | 0.0027617 | 0.0056401 | 0.0034082 | 0.0048969 | 0.0060076 | 0.0024972 | 0.0023964 | 0.0017047 | 0.0024963 | 0.0016792 | 0.0013263 | 0.0010696 |
| 0.0119846 | 0.0035519 | 0.0054418 | 0.0031355 | 0.0042005 | 0.0058019 | 0.0022753 | 0.0024906 | 0.0015952 | 0.0024972 | 0.0015991 | 0.0013031 | 0.0012369 |
| 0.0143868 | 0.0042896 | 0.0035566 | 0.0023533 | 0.0044387 | 0.003943  | 0.00161   | 0.0037879 | 0.0013879 | 0.0010087 | 0.0014845 | 0.0011759 | 0.0015109 |
| 0.0146997 | 0.0029487 | 0.0038893 | 0.00275   | 0.00626   | 0.0050318 | 0.0022076 | 0.0024587 | 0.0012201 | 0.0011305 | 0.0016089 | 0.0012204 | 0.0014963 |
| 0.0171566 | 0.0029182 | 0.0028963 | 0.0020782 | 0.0038136 | 0.002631  | 0.002085  | 0.0026079 | 0.0015791 | 0.0010842 | 0.0007329 | 0.0009109 | 0.0020359 |
| 0.0140942 | 0.0029886 | 0.0033397 | 0.0029855 | 0.0041171 | 0.0040122 | 0.0025724 | 0.0026663 | 0.000932  | 0.0006877 | 0.0006235 | 0.0011667 | 0.0017667 |
| 0.0087272 | 0.0040419 | 0.002393  | 0.0044693 | 0.0057987 | 0.003864  | 0.003095  | 0.0013793 | 0.0026848 | 0.0092225 | 0.0002495 | 0.0029064 | 0.0028591 |
| 0.0079945 | 0.0050507 | 0.0041121 | 0.0024971 | 0.0037052 | 0.0049695 | 0.0013765 | 0.0032179 | 0.0029299 | 0.004775  | 0.001981  | 0.0012808 | 0.0021728 |
| 0.0074213 | 0.0045557 | 0.003847  | 0.0023413 | 0.0037868 | 0.0032091 | 0.0013072 | 0.0035003 | 0.0032133 | 0.0045593 | 0.0017984 | 0.001143  | 0.0019483 |
| 0.0046664 | 0.0054277 | 0.0050483 | 0.0040095 | 0.0064313 | 0.010307  | 0.0010553 | 0.0018015 | 0.0025868 | 0.0009619 | 0.0013062 | 0.0008422 | 0.001486  |
| 0.0046295 | 0.0054209 | 0.0050517 | 0.0040393 | 0.0064348 | 0.0102434 | 0.0010724 | 0.0018164 | 0.0025964 | 0.0009769 | 0.0013076 | 0.0008576 | 0.0015052 |
| 0.0067795 | 0.0022294 | 0.0025363 | 0.0039297 | 0.0045471 | 0.0087598 | 0.001734  | 0.0025774 | 0.0031612 | 0.0021057 | 0.0017429 | 0.0008065 | 0.0024762 |
| 0.0070748 | 0.003449  | 0.0046922 | 0.0039891 | 0.0075884 | 0.0105908 | 0.0013563 | 0.0019134 | 0.0016864 | 0.0007533 | 0.0020615 | 0.0007306 | 0.0014186 |
| 0.0062295 | 0.0034888 | 0.0034779 | 0.0042543 | 0.0086302 | 0.0071377 | 0.0013345 | 0.0019433 | 0.0018761 | 0.0006768 | 0.0020212 | 0.000734  | 0.0016194 |
| 0.0062767 | 0.0023574 | 0.0069782 | 0.0029721 | 0.0125542 | 0.0183307 | 0.0011846 | 0.0025855 | 0.0017132 | 0.0010022 | 0.001365  | 0.0011533 | 0.0019276 |
| 0.0057085 | 0.0027489 | 0.0050852 | 0.0021335 | 0.0132338 | 0.010381  | 0.0012383 | 0.0023575 | 0.0018208 | 0.0008914 | 0.0011865 | 0.0011698 | 0.0011238 |
| 0.0026169 | 0.0060231 | 0.005263  | 0.0026587 | 0.0027714 | 0.0033362 | 0.0018453 | 0.0057894 | 0.0029495 | 0.0029794 | 0.0022965 | 0.0010498 | 0.001893  |
| 0.0021878 | 0.0097942 | 0.0049716 | 0.0049538 | 0.0018298 | 0.0020412 | 0.0016758 | 0.0037221 | 0.0036813 | 0.0013068 | 0.0012712 | 0.0010664 | 0.0008628 |
| 0.0026969 | 0.0055981 | 0.0049775 | 0.0070226 | 0.0035124 | 0.0027448 | 0.0015374 | 0.0014658 | 0.0016521 | 0.0011528 | 0.0012437 | 0.000847  | 0.0007591 |
| 0.0028123 | 0.0062804 | 0.0055584 | 0.007066  | 0.0031508 | 0.0038589 | 0.0015262 | 0.0012852 | 0.0016717 | 0.0010434 | 0.001222  | 0.0009362 | 0.0007622 |
| 0.0082324 | 0.0057284 | 0.0065159 | 0.0029194 | 0.00197   | 0.0019224 | 0.0018374 | 0.0013278 | 0.001538  | 0.0018635 | 0.0012382 | 0.0007145 | 0.0014857 |
| 0.0050482 | 0.0117359 | 0.0052656 | 0.0087847 | 0.003759  | 0.00315   | 0.0010391 | 0.0014881 | 0.0017896 | 0.0020104 | 0.0018762 | 0.000894  | 0.0011819 |
| 0.0039348 | 0.0080733 | 0.008748  | 0.0082193 | 0.0032398 | 0.004068  | 0.0010332 | 0.0016996 | 0.0020741 | 0.0011873 | 0.0013143 | 0.0009428 | 0.0011436 |
| 0.0073781 | 0.0065803 | 0.0057727 | 0.0036202 | 0.0017518 | 0.0018977 | 0.0016948 | 0.0019465 | 0.001521  | 0.0021731 | 0.0017448 | 0.0005995 | 0.0018454 |
| 0.0081695 | 0.0112928 | 0.0060496 | 0.0045138 | 0.0024708 | 0.0030693 | 0.0012411 | 0.0018404 | 0.0023036 | 0.0023926 | 0.001882  | 0.0007832 | 0.0021981 |
| 0.0099386 | 0.0073461 | 0.0036082 | 0.0069248 | 0.004372  | 0.0051995 | 0.0017634 | 0.0020542 | 0.0019327 | 0.001263  | 0.0020911 | 0.0009257 | 0.0024546 |
| 0.0068661 | 0.0053349 | 0.0128794 | 0.0061746 | 0.0090487 | 0.0072944 | 0.0011412 | 0.0037915 | 0.0017234 | 0.0009321 | 0.0021866 | 0.0006806 | 0.000965  |

|           |           |           |           |           |           |           |           |           |           |           |           |           |
|-----------|-----------|-----------|-----------|-----------|-----------|-----------|-----------|-----------|-----------|-----------|-----------|-----------|
| 0.0071343 | 0.0053891 | 0.0134828 | 0.0063463 | 0.0074707 | 0.0099528 | 0.001475  | 0.0038198 | 0.0018932 | 0.0010978 | 0.0025027 | 0.0008857 | 0.0011286 |
| 0.0108457 | 0.0056964 | 0.005346  | 0.0072007 | 0.006904  | 0.0058978 | 0.0008198 | 0.0022864 | 0.0022959 | 0.0016229 | 0.0020085 | 0.0011119 | 0.0005895 |
| 0.0098565 | 0.0068198 | 0.0080805 | 0.0062202 | 0.0050341 | 0.0066918 | 0.0007007 | 0.0008958 | 0.0017501 | 0.0013784 | 0.0018564 | 0.0008578 | 0.0007623 |
| 0.0038287 | 0.0072067 | 0.0039456 | 0.0076535 | 0.0032389 | 0.0044656 | 0.0037048 | 0.0013568 | 0.0012596 | 0.0006589 | 0.0018229 | 0.0014723 | 0.000461  |
| 0.0035823 | 0.0067747 | 0.0032926 | 0.0079083 | 0.0036726 | 0.0032813 | 0.0033648 | 0.0016774 | 0.0013297 | 0.0007329 | 0.0015486 | 0.0013081 | 0.0004493 |
| 0.0049474 | 0.0073721 | 0.0051514 | 0.0066349 | 0.0070949 | 0.0056832 | 0.0021103 | 0.0018723 | 0.0016874 | 0.0009695 | 0.000976  | 0.0020308 | 0.0007044 |
| 0.0023379 | 0.0048126 | 0.003576  | 0.0053495 | 0.0042902 | 0.0053005 | 0.0028308 | 0.0016639 | 0.0014469 | 0.0003716 | 0.0018204 | 0.0012615 | 0.000585  |
| 0.0028946 | 0.0054546 | 0.0033263 | 0.0055081 | 0.0042798 | 0.0035912 | 0.0026463 | 0.0015393 | 0.0013783 | 0.0003623 | 0.0017587 | 0.0011459 | 0.0006205 |
| 0.0043342 | 0.0034762 | 0.0057285 | 0.0051835 | 0.0048592 | 0.0066116 | 0.0023862 | 0.0014005 | 0.0014414 | 0.000582  | 0.0015043 | 0.0012385 | 0.0008386 |
| 0.0042979 | 0.00383   | 0.005355  | 0.0054931 | 0.005072  | 0.004118  | 0.0022545 | 0.0013551 | 0.0014371 | 0.0005053 | 0.0015546 | 0.0010496 | 0.0008419 |
| 0.0040068 | 0.0038601 | 0.0076712 | 0.0064294 | 0.0040531 | 0.004781  | 0.0010947 | 0.0021341 | 0.0022539 | 0.0004683 | 0.001523  | 0.0011692 | 0.0008674 |
| 0.0070053 | 0.0040231 | 0.0092291 | 0.0063348 | 0.0081358 | 0.0062543 | 0.0012263 | 0.0016255 | 0.0016496 | 0.000512  | 0.0020617 | 0.0009521 | 0.0007853 |
| 0.0055236 | 0.0041387 | 0.0082561 | 0.0060915 | 0.0047522 | 0.0054401 | 0.001937  | 0.0014149 | 0.0024632 | 0.0006092 | 0.0015294 | 0.0006959 | 0.0005775 |
| 0.0047252 | 0.0029754 | 0.005884  | 0.0040054 | 0.0055532 | 0.0077566 | 0.0021303 | 0.0018358 | 0.0014497 | 0.001065  | 0.0010673 | 0.0012547 | 0.0016268 |
| 0.0047823 | 0.0030767 | 0.0070013 | 0.0057895 | 0.0060675 | 0.0067641 | 0.0014669 | 0.0012066 | 0.0020472 | 0.0010615 | 0.0022303 | 0.0010397 | 0.0011706 |
| 0.0027012 | 0.0019754 | 0.0050188 | 0.0081402 | 0.0051095 | 0.007314  | 0.0020171 | 0.0013624 | 0.0016214 | 0.0012023 | 0.0021887 | 0.0011929 | 0.0012305 |
| 0.0025164 | 0.0018002 | 0.0040382 | 0.0078713 | 0.0067999 | 0.0053972 | 0.0018047 | 0.0017746 | 0.0017432 | 0.0013769 | 0.0020639 | 0.001068  | 0.0013289 |
| 0.0041692 | 0.0028832 | 0.0035303 | 0.0029034 | 0.0054317 | 0.0068586 | 0.0037208 | 0.0046742 | 0.0020087 | 0.0008501 | 0.0017969 | 0.0011076 | 0.0011828 |
| 0.0034107 | 0.0028502 | 0.0031474 | 0.0029414 | 0.0059583 | 0.0057846 | 0.0033534 | 0.0050057 | 0.0018566 | 0.0008484 | 0.0019976 | 0.0011408 | 0.0012788 |
| 0.0026744 | 0.0032429 | 0.0075779 | 0.0052125 | 0.0199343 | 0.0114949 | 0.0017108 | 0.0021183 | 0.0010475 | 0.0005404 | 0.0010949 | 0.0011664 | 0.000773  |
| 0.0039607 | 0.0031056 | 0.0057566 | 0.0049728 | 0.0093571 | 0.0113001 | 0.0021826 | 0.0015772 | 0.0008975 | 0.0006159 | 0.0012348 | 0.0016343 | 0.0008861 |
| 0.0036161 | 0.0025439 | 0.0046012 | 0.00489   | 0.0111271 | 0.008821  | 0.0020616 | 0.0019392 | 0.0009255 | 0.00074   | 0.0012129 | 0.0012903 | 0.000981  |
| 0.0036159 | 0.0022644 | 0.0090869 | 0.0033841 | 0.0126891 | 0.015303  | 0.0016695 | 0.0018782 | 0.0010102 | 0.0006384 | 0.0010478 | 0.0019219 | 0.0011836 |
| 0.0032033 | 0.0019565 | 0.0075927 | 0.0034996 | 0.0151569 | 0.0122595 | 0.0016467 | 0.0021435 | 0.0010344 | 0.0008344 | 0.0010497 | 0.0016223 | 0.0011848 |
| 0.002176  | 0.0028287 | 0.0080054 | 0.0076369 | 0.0045388 | 0.0110982 | 0.0011968 | 0.0014663 | 0.002265  | 0.0019982 | 0.0023156 | 0.0010642 | 0.0015019 |
| 0.0021222 | 0.0028873 | 0.0085379 | 0.0038454 | 0.0060261 | 0.0055946 | 0.0014157 | 0.0019343 | 0.0025397 | 0.0014093 | 0.0030497 | 0.0010857 | 0.0022975 |
| 0.0033151 | 0.0033011 | 0.010381  | 0.0052946 | 0.0072384 | 0.0064045 | 0.0020021 | 0.0013    | 0.0024407 | 0.0010866 | 0.0026999 | 0.0011516 | 0.0015185 |
| 0.0036933 | 0.0030965 | 0.0106712 | 0.0046301 | 0.008786  | 0.0073322 | 0.0023403 | 0.0019535 | 0.0031861 | 0.0016276 | 0.0028885 | 0.0013306 | 0.001996  |
| 0.0024224 | 0.0041436 | 0.0098769 | 0.008722  | 0.0088964 | 0.0057547 | 0.0017376 | 0.0024771 | 0.0018716 | 0.0016597 | 0.001254  | 0.000858  | 0.0011225 |
| 0.0026788 | 0.0037484 | 0.0071911 | 0.0090795 | 0.0068721 | 0.0050184 | 0.0012971 | 0.0022028 | 0.0022565 | 0.0008442 | 0.0019196 | 0.0009397 | 0.001926  |
| 0.0018504 | 0.0040653 | 0.0082115 | 0.0094186 | 0.0063581 | 0.0078993 | 0.0011249 | 0.00208   | 0.0021758 | 0.000916  | 0.0012808 | 0.0008561 | 0.0021985 |
| 0.0027497 | 0.0027507 | 0.0082097 | 0.0116262 | 0.0083254 | 0.0070957 | 0.0011447 | 0.0020729 | 0.0018185 | 0.0012105 | 0.0019256 | 0.0009742 | 0.0020345 |
| 0.0033646 | 0.0044359 | 0.0099608 | 0.0070592 | 0.0137239 | 0.0098662 | 0.0013356 | 0.0017811 | 0.0018919 | 0.001514  | 0.0020959 | 0.0010153 | 0.0013387 |
| 0.0021462 | 0.0042587 | 0.0160815 | 0.0087768 | 0.0138492 | 0.0099333 | 0.0014072 | 0.0023109 | 0.0016997 | 0.0009764 | 0.0016365 | 0.0010008 | 0.0016108 |
| 0.0021913 | 0.0044093 | 0.0167493 | 0.0084982 | 0.0108022 | 0.0136555 | 0.0013746 | 0.0021727 | 0.0013304 | 0.0009701 | 0.0016949 | 0.0011121 | 0.0016675 |
| 0.0019096 | 0.0043793 | 0.0104159 | 0.0067739 | 0.0068634 | 0.0081686 | 0.0009423 | 0.0035344 | 0.0020436 | 0.001101  | 0.0021297 | 0.0009002 | 0.0016242 |
| 0.0031009 | 0.0040274 | 0.0099727 | 0.0086112 | 0.0091415 | 0.0115898 | 0.0013413 | 0.0034479 | 0.0024431 | 0.0006968 | 0.0022517 | 0.0009106 | 0.0015942 |
| 0.0021525 | 0.0025831 | 0.009378  | 0.0085899 | 0.0074162 | 0.0054199 | 0.0016605 | 0.0013267 | 0.0029417 | 0.0004249 | 0.0023677 | 0.0012586 | 0.0012234 |
| 0.0046551 | 0.0056337 | 0.012753  | 0.0056505 | 0.0105195 | 0.0144972 | 0.0016177 | 0.0023991 | 0.0016689 | 0.0008373 | 0.0032957 | 0.0006076 | 0.001256  |
| 0.0025117 | 0.0063214 | 0.0052053 | 0.0074468 | 0.0056472 | 0.0044351 | 0.001225  | 0.0017608 | 0.002033  | 0.0033762 | 0.0030641 | 0.0023371 | 0.0039029 |
| 0.0015137 | 0.001902  | 0.0041106 | 0.0055328 | 0.0044266 | 0.0061414 | 0.0018187 | 0.0041613 | 0.0032509 | 0.0150846 | 0.0016954 | 0.0019877 | 0.003985  |
| 0.002939  | 0.0035738 | 0.0031789 | 0.0036542 | 0.0057838 | 0.0075908 | 0.0014433 | 0.0021278 | 0.0018226 | 0.0072981 | 0.0028845 | 0.002261  | 0.0030693 |
| 0.0038413 | 0.0041913 | 0.0033806 | 0.0042403 | 0.0071025 | 0.0055327 | 0.0016443 | 0.002932  | 0.0022747 | 0.0107333 | 0.0040732 | 0.0029545 | 0.0028618 |
| 0.0034426 | 0.0033295 | 0.0025383 | 0.0067778 | 0.0039961 | 0.0035935 | 0.0018348 | 0.0026603 | 0.0020798 | 0.006481  | 0.0037656 | 0.0031298 | 0.0024938 |
| 0.0039084 | 0.0034908 | 0.004318  | 0.0020284 | 0.0082475 | 0.0130634 | 0.003994  | 0.0065927 | 0.0021195 | 0.0024629 | 0.0011092 | 0.0021259 | 0.0038953 |
| 0.0053156 | 0.0031041 | 0.0025386 | 0.002053  | 0.0062208 | 0.0052828 | 0.0030554 | 0.0031867 | 0.0024606 | 0.0021455 | 0.0014443 | 0.0018211 | 0.0042252 |
| 0.0018998 | 0.0030431 | 0.0056518 | 0.0016764 | 0.0082488 | 0.0060197 | 0.0021882 | 0.0100285 | 0.0036424 | 0.0123583 | 0.0018773 | 0.00246   | 0.0045634 |
| 0.002048  | 0.0026043 | 0.0043289 | 0.0020969 | 0.0058423 | 0.0049525 | 0.0023408 | 0.0062441 | 0.0045438 | 0.0110302 | 0.0023372 | 0.0021846 | 0.0058439 |
| 0.0018537 | 0.0025559 | 0.0035388 | 0.0016161 | 0.0080478 | 0.0038223 | 0.0015357 | 0.0055902 | 0.0042791 | 0.0116851 | 0.0020001 | 0.0015865 | 0.0047155 |
| 0.0029733 | 0.0022375 | 0.0040369 | 0.00234   | 0.0058015 | 0.0071907 | 0.0018148 | 0.0048663 | 0.001998  | 0.0065505 | 0.0029762 | 0.0020433 | 0.0048187 |
| 0.0026359 | 0.0022066 | 0.0029405 | 0.0021917 | 0.0052237 | 0.0063547 | 0.0015622 | 0.0060532 | 0.0024781 | 0.0082019 | 0.0022909 | 0.0018942 | 0.0040673 |
| 0.0031384 | 0.0063047 | 0.0024388 | 0.0036928 | 0.0014285 | 0.0018043 | 0.0069881 | 0.0066658 | 0.0051666 | 0.0032697 | 0.0056268 | 0.005342  | 0.006728  |
| 0.003873  | 0.0049708 | 0.0023677 | 0.0034428 | 0.0015127 | 0.0013289 | 0.0066826 | 0.0050357 | 0.0053495 | 0.003319  | 0.0066434 | 0.0054155 | 0.0065502 |
| 0.0042179 | 0.0055096 | 0.0026951 | 0.0039448 | 0.0018523 | 0.0011885 | 0.0088407 | 0.0054994 | 0.0052662 | 0.0028844 | 0.0061832 | 0.0040769 | 0.0060213 |
| 0.0036177 | 0.0070348 | 0.0030067 | 0.0049879 | 0.0026474 | 0.0019568 | 0.0048069 | 0.0035713 | 0.008342  | 0.0030494 | 0.0059163 | 0.0085711 | 0.0060292 |
| 0.0037501 | 0.0066353 | 0.0022301 | 0.0049898 | 0.0020431 | 0.00176   | 0.0058304 | 0.0043844 | 0.0049884 | 0.0059413 | 0.0082997 | 0.0048326 | 0.006571  |
| 0.0034562 | 0.0102662 | 0.0038159 | 0.0047402 | 0.0020246 | 0.0020123 | 0.0052237 | 0.0063889 | 0.0043479 | 0.0051659 | 0.0064319 | 0.0044367 | 0.0081131 |
| 0.0025535 | 0.0134531 | 0.0047297 | 0.0022567 | 0.0016763 | 0.0015565 | 0.0025444 | 0.005873  | 0.005159  | 0.0117161 | 0.0067489 | 0.0044174 | 0.0043266 |

|           |           |           |           |           |           |           |           |           |           |           |           |           |
|-----------|-----------|-----------|-----------|-----------|-----------|-----------|-----------|-----------|-----------|-----------|-----------|-----------|
| 0.0019456 | 0.0180493 | 0.0067299 | 0.0019104 | 0.0014577 | 0.0014354 | 0.0028032 | 0.0092528 | 0.0045268 | 0.008734  | 0.0046098 | 0.0028968 | 0.004178  |
| 0.0019789 | 0.0182368 | 0.0078827 | 0.001819  | 0.00119   | 0.0013462 | 0.0026865 | 0.0086563 | 0.0044864 | 0.0070261 | 0.00442   | 0.0026464 | 0.0043274 |
| 0.0015512 | 0.0078482 | 0.0038047 | 0.002886  | 0.0020768 | 0.0018418 | 0.0032038 | 0.0092957 | 0.0069642 | 0.0077929 | 0.0072884 | 0.0055808 | 0.0058697 |
| 0.0016559 | 0.0092415 | 0.0032654 | 0.0027224 | 0.0016124 | 0.001597  | 0.0024297 | 0.0073608 | 0.0053873 | 0.0067047 | 0.0059429 | 0.0043705 | 0.0047852 |
| 0.0019697 | 0.0125636 | 0.0039788 | 0.0023571 | 0.0016667 | 0.0016183 | 0.0026277 | 0.0081961 | 0.0052785 | 0.0080566 | 0.0059185 | 0.0038974 | 0.0046328 |
| 0.0019331 | 0.0091059 | 0.0035117 | 0.0020071 | 0.0018212 | 0.0015577 | 0.0025479 | 0.0063183 | 0.0057777 | 0.0101622 | 0.0069199 | 0.0048172 | 0.0049749 |
| 0.0018671 | 0.0105932 | 0.0038561 | 0.0023332 | 0.0015312 | 0.0013312 | 0.0033013 | 0.0075134 | 0.0047407 | 0.0039018 | 0.0058816 | 0.0036842 | 0.0044547 |
| 0.001807  | 0.0098804 | 0.0030579 | 0.0026759 | 0.0015566 | 0.0015162 | 0.0031339 | 0.0084534 | 0.0056421 | 0.0078108 | 0.005921  | 0.0037527 | 0.005029  |
| 0.0015283 | 0.0067385 | 0.0028014 | 0.0023982 | 0.001776  | 0.0020084 | 0.0029034 | 0.0067338 | 0.0060232 | 0.0083754 | 0.0074425 | 0.0051895 | 0.0044158 |
| 0.0014265 | 0.0034648 | 0.0052957 | 0.0049272 | 0.0018283 | 0.0013754 | 0.0028474 | 0.0105276 | 0.0041845 | 0.0061395 | 0.0023385 | 0.0034439 | 0.0080746 |
| 0.0013125 | 0.0035508 | 0.0024482 | 0.0022871 | 0.0020448 | 0.001971  | 0.0037732 | 0.004926  | 0.0062407 | 0.0076469 | 0.0056406 | 0.0058491 | 0.0054666 |
| 0.0012811 | 0.0031459 | 0.0026205 | 0.0028832 | 0.0019543 | 0.0014423 | 0.0040083 | 0.0036454 | 0.0048132 | 0.0081792 | 0.0102148 | 0.0051429 | 0.0061268 |
| 0.0010217 | 0.0041673 | 0.0025126 | 0.0025305 | 0.0016886 | 0.0013843 | 0.0040263 | 0.0052687 | 0.0053309 | 0.0045311 | 0.0075233 | 0.0042606 | 0.0048688 |
| 0.001031  | 0.0043369 | 0.0029079 | 0.0024135 | 0.0020499 | 0.0018743 | 0.0027905 | 0.0041986 | 0.0073059 | 0.003663  | 0.0073102 | 0.005843  | 0.005511  |
| 0.001331  | 0.0019017 | 0.0034515 | 0.0024607 | 0.0045906 | 0.0045027 | 0.0021649 | 0.0046323 | 0.0040104 | 0.0172866 | 0.0050869 | 0.0066552 | 0.0037683 |
| 0.0024383 | 0.0036563 | 0.0059968 | 0.0015824 | 0.0020506 | 0.0021956 | 0.0018982 | 0.003945  | 0.0041392 | 0.0187855 | 0.0051979 | 0.0074981 | 0.004003  |
| 0.0019298 | 0.0024739 | 0.0022147 | 0.0044596 | 0.001309  | 0.0017521 | 0.0045233 | 0.0046259 | 0.0067365 | 0.009503  | 0.0061908 | 0.0053361 | 0.0048235 |
| 0.0014648 | 0.0069603 | 0.0028098 | 0.0027769 | 0.0019444 | 0.0019468 | 0.0029635 | 0.0060553 | 0.0064791 | 0.0145638 | 0.0088831 | 0.0048495 | 0.0079023 |
| 0.0031038 | 0.0036819 | 0.0016458 | 0.0033207 | 0.0020567 | 0.0018147 | 0.0046658 | 0.0043838 | 0.0048027 | 0.0171263 | 0.0067729 | 0.0055313 | 0.0082815 |
| 0.0016775 | 0.0059928 | 0.002181  | 0.003916  | 0.0015656 | 0.0018835 | 0.0043563 | 0.0051295 | 0.005935  | 0.0136518 | 0.0055469 | 0.0048468 | 0.008363  |
| 0.0024177 | 0.0067057 | 0.0028522 | 0.0035499 | 0.0013964 | 0.0012418 | 0.0048492 | 0.0056579 | 0.0043166 | 0.016994  | 0.0055755 | 0.0049294 | 0.0099503 |
| 0.0025686 | 0.0054525 | 0.0023974 | 0.0019026 | 0.0014632 | 0.0011929 | 0.0063376 | 0.005488  | 0.0051428 | 0.0238304 | 0.0049184 | 0.0047215 | 0.0092433 |
| 0.0017579 | 0.003867  | 0.0020835 | 0.0038763 | 0.001891  | 0.0017411 | 0.0033354 | 0.0037875 | 0.0058676 | 0.0067608 | 0.0087067 | 0.0049208 | 0.006     |
| 0.0016853 | 0.0028046 | 0.001507  | 0.0030647 | 0.0019552 | 0.0018073 | 0.0053796 | 0.003633  | 0.0051567 | 0.0032992 | 0.0072118 | 0.0051698 | 0.0068542 |
| 0.0025035 | 0.0020967 | 0.0011725 | 0.0027557 | 0.0021527 | 0.0018443 | 0.0046105 | 0.0041349 | 0.0054812 | 0.0090063 | 0.0057361 | 0.0057757 | 0.0078976 |
| 0.0013973 | 0.0036166 | 0.0019717 | 0.0043133 | 0.0022287 | 0.0019505 | 0.0039668 | 0.003974  | 0.0055472 | 0.0134693 | 0.0069001 | 0.0057441 | 0.0092534 |
| 0.0011884 | 0.0027413 | 0.001936  | 0.004681  | 0.001796  | 0.0014531 | 0.0036671 | 0.0042547 | 0.0063605 | 0.0069887 | 0.0079723 | 0.0058134 | 0.0083205 |
| 0.003887  | 0.0039373 | 0.0034003 | 0.0034382 | 0.0022058 | 0.0020817 | 0.0064786 | 0.0043668 | 0.0053971 | 0.0031631 | 0.0046372 | 0.0074868 | 0.0064333 |
| 0.0032759 | 0.0042083 | 0.0015519 | 0.0040973 | 0.0027355 | 0.0021231 | 0.0065451 | 0.0037142 | 0.0047871 | 0.0038966 | 0.0070959 | 0.0052006 | 0.0067374 |
| 0.002795  | 0.0054557 | 0.0023926 | 0.0040898 | 0.0029399 | 0.0020286 | 0.0055819 | 0.0050648 | 0.0046046 | 0.0039208 | 0.0056953 | 0.0052517 | 0.0098502 |
| 0.0027074 | 0.0032798 | 0.0015578 | 0.0039394 | 0.0036084 | 0.0005971 | 0.0073956 | 0.0047067 | 0.0045303 | 0.00316   | 0.0048504 | 0.0075399 | 0.0053017 |
| 0.0024066 | 0.0030864 | 0.0018106 | 0.004799  | 0.0024347 | 0.001591  | 0.0059733 | 0.0040336 | 0.005526  | 0.0032018 | 0.0035572 | 0.0070186 | 0.0063585 |
| 0.0008715 | 0.0024153 | 0.002207  | 0.0047379 | 0.0016455 | 0.0014707 | 0.0044297 | 0.005531  | 0.0045285 | 0.0076714 | 0.0026047 | 0.0038629 | 0.0052355 |
| 0.000871  | 0.0024159 | 0.0022054 | 0.0047415 | 0.0016455 | 0.0014706 | 0.0044338 | 0.0055365 | 0.0045323 | 0.0075517 | 0.0026048 | 0.0038661 | 0.0052411 |
| 0.0011133 | 0.0026648 | 0.0021441 | 0.0029356 | 0.0011727 | 0.0015336 | 0.0054422 | 0.0054901 | 0.0040547 | 0.0059442 | 0.0024605 | 0.0042995 | 0.0065393 |
| 0.0012282 | 0.003016  | 0.0020964 | 0.0030649 | 0.0013369 | 0.0011692 | 0.005404  | 0.0053091 | 0.0039804 | 0.0050426 | 0.002561  | 0.0042689 | 0.006309  |
| 0.0012279 | 0.0030173 | 0.002096  | 0.0030663 | 0.0013366 | 0.0011687 | 0.0054019 | 0.0053072 | 0.003979  | 0.0050406 | 0.002563  | 0.0042672 | 0.0063061 |
| 0.0011117 | 0.0029534 | 0.0020423 | 0.0020775 | 0.0015933 | 0.0014983 | 0.0069958 | 0.0063705 | 0.0032872 | 0.0032042 | 0.0019422 | 0.0049228 | 0.005676  |
| 0.0011391 | 0.0021492 | 0.0020422 | 0.0020755 | 0.0016123 | 0.0014383 | 0.0070912 | 0.006444  | 0.0033048 | 0.0032263 | 0.002019  | 0.0049744 | 0.0057434 |
| 0.0012021 | 0.0024613 | 0.0027184 | 0.001647  | 0.0016278 | 0.0020947 | 0.0047293 | 0.0065486 | 0.0039695 | 0.0064775 | 0.0023176 | 0.0046966 | 0.0056933 |
| 0.0010758 | 0.0023191 | 0.0023199 | 0.0023371 | 0.0017625 | 0.0014544 | 0.0048107 | 0.0063599 | 0.0038361 | 0.0036255 | 0.0020808 | 0.0049502 | 0.0059046 |
| 0.0012384 | 0.0029052 | 0.0028153 | 0.002419  | 0.0015472 | 0.0013644 | 0.0046351 | 0.0051496 | 0.004045  | 0.0034538 | 0.002105  | 0.0047419 | 0.0050936 |
| 0.0014457 | 0.0017875 | 0.0025627 | 0.0020831 | 0.0007965 | 0.0012702 | 0.0044465 | 0.0041183 | 0.0032473 | 0.0052189 | 0.0024953 | 0.0039379 | 0.0059095 |
| 0.0012275 | 0.0028556 | 0.0023496 | 0.002765  | 0.0010165 | 0.0012437 | 0.0046639 | 0.0043119 | 0.0049504 | 0.0060286 | 0.0032412 | 0.0048797 | 0.0071768 |
| 0.0011634 | 0.0027082 | 0.0024611 | 0.0027012 | 0.0011186 | 0.001452  | 0.0052438 | 0.0052182 | 0.0045072 | 0.0067309 | 0.0030223 | 0.0044162 | 0.0065997 |
| 0.0011789 | 0.0025785 | 0.0021022 | 0.0027442 | 0.0012666 | 0.0011174 | 0.0049982 | 0.0050502 | 0.0047327 | 0.0062958 | 0.0029445 | 0.0044525 | 0.0063885 |
| 0.0011957 | 0.0022633 | 0.002097  | 0.0027398 | 0.0012461 | 0.0011126 | 0.0049587 | 0.0051475 | 0.0047664 | 0.0062733 | 0.0029582 | 0.0043924 | 0.0063053 |
| 0.0019242 | 0.0033498 | 0.001779  | 0.0038951 | 0.0017981 | 0.0015103 | 0.0053667 | 0.0052634 | 0.0048457 | 0.0050234 | 0.001914  | 0.002753  | 0.0045179 |
| 0.0020463 | 0.0036583 | 0.0015367 | 0.0044045 | 0.0022033 | 0.001832  | 0.0057502 | 0.0049249 | 0.0051092 | 0.0039178 | 0.0021243 | 0.0032603 | 0.0041012 |
| 0.0020471 | 0.0036601 | 0.0015375 | 0.0044082 | 0.0022053 | 0.0018347 | 0.0057508 | 0.0049269 | 0.005111  | 0.0039196 | 0.0021253 | 0.0032627 | 0.0041031 |
| 0.0012775 | 0.0028711 | 0.0012981 | 0.0056121 | 0.0026    | 0.0032811 | 0.0053696 | 0.0061885 | 0.0054859 | 0.0043784 | 0.0033831 | 0.0061871 | 0.0050004 |
| 0.0012745 | 0.0026853 | 0.0015215 | 0.0070533 | 0.0025429 | 0.0025043 | 0.0058414 | 0.0069723 | 0.0045295 | 0.0050194 | 0.003501  | 0.005287  | 0.005008  |
| 0.0011848 | 0.0028462 | 0.0011985 | 0.0078887 | 0.002585  | 0.0022337 | 0.0060806 | 0.0073363 | 0.0046644 | 0.0053955 | 0.0032992 | 0.0057308 | 0.0048069 |
| 0.0011995 | 0.0026745 | 0.0019043 | 0.0019336 | 0.0012222 | 0.0013638 | 0.006697  | 0.0060647 | 0.0042117 | 0.004631  | 0.0026723 | 0.0064485 | 0.0050948 |
| 0.0014988 | 0.0020116 | 0.0018593 | 0.0022686 | 0.0021756 | 0.0027086 | 0.0063772 | 0.0070595 | 0.0056738 | 0.0035751 | 0.0018204 | 0.0058478 | 0.0056421 |
| 0.0018222 | 0.0021509 | 0.0015331 | 0.0022203 | 0.0023752 | 0.0020592 | 0.0057801 | 0.007349  | 0.0054717 | 0.0037846 | 0.0017372 | 0.0058245 | 0.0056839 |
| 0.0014887 | 0.0034408 | 0.0016495 | 0.0026641 | 0.0012698 | 0.0011449 | 0.005005  | 0.0059377 | 0.0055183 | 0.0029666 | 0.0023988 | 0.007037  | 0.0049351 |
| 0.0015103 | 0.003333  | 0.0016719 | 0.002703  | 0.001344  | 0.0011738 | 0.0050644 | 0.0060241 | 0.0054986 | 0.00314   | 0.0022756 | 0.0068    | 0.0047699 |

|           |           |           |           |           |           |           |           |           |           |           |           |           |
|-----------|-----------|-----------|-----------|-----------|-----------|-----------|-----------|-----------|-----------|-----------|-----------|-----------|
| 0.0012802 | 0.0021699 | 0.001419  | 0.0035884 | 0.0015168 | 0.0020761 | 0.0056142 | 0.0088929 | 0.0057565 | 0.0047034 | 0.0024092 | 0.0060149 | 0.0060278 |
| 0.0012963 | 0.0025552 | 0.0016482 | 0.003262  | 0.0010749 | 0.0013872 | 0.0054035 | 0.0078224 | 0.0056556 | 0.0035525 | 0.002654  | 0.0065647 | 0.0055996 |
| 0.0031636 | 0.0048557 | 0.0029522 | 0.0005043 | 0.0031127 | 0.0031045 | 0.0045304 | 0.0033734 | 0.00503   | 0.0035748 | 0.0037487 | 0.0052669 | 0.0052894 |
| 0.0024531 | 0.0013501 | 0.0027692 | 0.0043296 | 0.0030142 | 0.0030791 | 0.0035775 | 0.0032299 | 0.0045389 | 0.0039867 | 0.0053917 | 0.0042652 | 0.004181  |
| 0.0029646 | 0.0031445 | 0.0026406 | 0.0032965 | 0.0029423 | 0.0029074 | 0.0045073 | 0.0032064 | 0.0042411 | 0.0026596 | 0.0059719 | 0.0044063 | 0.0049867 |
| 0.0014476 | 0.0030534 | 0.0025877 | 0.0033058 | 0.0029802 | 0.0026915 | 0.0051179 | 0.0035967 | 0.0055146 | 0.0061358 | 0.0080089 | 0.0054573 | 0.0052919 |
| 0.0015001 | 0.0025811 | 0.0033052 | 0.0026345 | 0.0022422 | 0.0028784 | 0.0045315 | 0.002299  | 0.0036263 | 0.0037276 | 0.0042626 | 0.004474  | 0.0046942 |
| 0.0008527 | 0.0022419 | 0.0039949 | 0.0062113 | 0.0016152 | 0.0013902 | 0.0035326 | 0.0030093 | 0.0071849 | 0.0050253 | 0.0097939 | 0.0051809 | 0.0035176 |
| 0.0021013 | 0.0030073 | 0.0016152 | 0.0035265 | 0.0020202 | 0.0020544 | 0.0053813 | 0.002123  | 0.004089  | 0.0017821 | 0.0131952 | 0.005258  | 0.0047659 |
| 0.0017123 | 0.0027598 | 0.0019182 | 0.0039222 | 0.0021896 | 0.0021018 | 0.0044245 | 0.0025772 | 0.0042759 | 0.0022585 | 0.0061673 | 0.0054749 | 0.0052762 |
| 0.0043548 | 0.0015802 | 0.0015898 | 0.0022854 | 0.0015401 | 0.0019111 | 0.0078477 | 0.0024027 | 0.0085519 | 0.0042432 | 0.0030073 | 0.0081717 | 0.0032348 |
| 0.0022569 | 0.0044773 | 0.0020835 | 0.0024278 | 0.001129  | 0.0011216 | 0.0069769 | 0.0055499 | 0.0057419 | 0.0027989 | 0.0054745 | 0.0070036 | 0.0062858 |
| 0.0025158 | 0.0033353 | 0.0015966 | 0.0025778 | 0.0016881 | 0.0016608 | 0.006276  | 0.0040431 | 0.0059844 | 0.0027819 | 0.0049676 | 0.0079783 | 0.0059453 |
| 0.0022443 | 0.0040614 | 0.0018784 | 0.0023476 | 0.0024938 | 0.0019228 | 0.0069474 | 0.0049375 | 0.0062677 | 0.0022028 | 0.0057134 | 0.0073996 | 0.0059138 |
| 0.0031462 | 0.0008312 | 0.0017546 | 0.0013998 | 0.0015513 | 0.0015034 | 0.0052486 | 0.0043274 | 0.0053016 | 0.0035891 | 0.0070794 | 0.0086131 | 0.0048642 |
| 0.0023629 | 0.0020051 | 0.0017106 | 0.0018557 | 0.0021988 | 0.0012582 | 0.0058907 | 0.00357   | 0.0059823 | 0.0023119 | 0.0061979 | 0.0088785 | 0.0042481 |
| 0.0030093 | 0.0018731 | 0.0015486 | 0.0019356 | 0.0015304 | 0.0011666 | 0.0054512 | 0.0036214 | 0.0054507 | 0.0018381 | 0.0063486 | 0.0087495 | 0.003858  |
| 0.0029004 | 0.0020409 | 0.0015613 | 0.0018973 | 0.0014441 | 0.0013662 | 0.0063875 | 0.003531  | 0.0060554 | 0.0028618 | 0.005249  | 0.0092338 | 0.0051628 |
| 0.0030911 | 0.0019629 | 0.0017601 | 0.0020206 | 0.0014353 | 0.0014002 | 0.006385  | 0.0033504 | 0.0053578 | 0.0018747 | 0.0051822 | 0.0100198 | 0.0054795 |
| 0.0028292 | 0.0032086 | 0.0018543 | 0.0022955 | 0.0013351 | 0.0013449 | 0.0064752 | 0.0049396 | 0.0057395 | 0.0029368 | 0.0059216 | 0.0060018 | 0.0055734 |
| 0.0029    | 0.0030406 | 0.0017205 | 0.0021519 | 0.0013011 | 0.001272  | 0.0068936 | 0.0049043 | 0.0058904 | 0.0032323 | 0.0061377 | 0.0066752 | 0.0058456 |
| 0.0028422 | 0.0029221 | 0.0017066 | 0.0022444 | 0.0014317 | 0.0014274 | 0.0068879 | 0.0046841 | 0.0060783 | 0.0031416 | 0.0063238 | 0.0071223 | 0.0055594 |
| 0.0033472 | 0.0036911 | 0.002201  | 0.0024013 | 0.001501  | 0.001952  | 0.0070828 | 0.0037568 | 0.0053965 | 0.0023614 | 0.0051838 | 0.0073081 | 0.0058303 |
| 0.0027126 | 0.0023376 | 0.0015757 | 0.0019742 | 0.0016079 | 0.0015198 | 0.0061295 | 0.0039512 | 0.0060805 | 0.0026699 | 0.0062489 | 0.0083709 | 0.004493  |
| 0.0028837 | 0.0027969 | 0.0017398 | 0.0022277 | 0.0015017 | 0.001451  | 0.0067433 | 0.0043448 | 0.0060754 | 0.0027235 | 0.0060834 | 0.0079297 | 0.0051917 |
| 0.0041478 | 0.0024344 | 0.0020697 | 0.0034557 | 0.0015537 | 0.0014151 | 0.0045186 | 0.0023611 | 0.0038055 | 0.0020279 | 0.0043301 | 0.0037528 | 0.0030334 |
| 0.0035555 | 0.0023167 | 0.0017664 | 0.0033367 | 0.0013726 | 0.0013235 | 0.0068016 | 0.0032182 | 0.0062784 | 0.0025865 | 0.0068228 | 0.007301  | 0.0045429 |
| 0.0039378 | 0.0022044 | 0.0014796 | 0.0038627 | 0.0013154 | 0.0010519 | 0.0060201 | 0.0016914 | 0.0058439 | 0.0020122 | 0.0066748 | 0.0061431 | 0.0035407 |
| 0.0024427 | 0.0026456 | 0.0016808 | 0.0027643 | 0.0016015 | 0.001747  | 0.0059675 | 0.0024642 | 0.0047124 | 0.0017995 | 0.0033561 | 0.0087688 | 0.0047949 |
| 0.0037194 | 0.0038236 | 0.0024086 | 0.0041129 | 0.0013143 | 0.0015898 | 0.0051952 | 0.003227  | 0.0051996 | 0.0019019 | 0.0060708 | 0.0071222 | 0.0049978 |
| 0.0062825 | 0.003035  | 0.002706  | 0.0041423 | 0.0023379 | 0.0021977 | 0.006529  | 0.0032124 | 0.0053133 | 0.0020313 | 0.0045078 | 0.0089149 | 0.0063428 |
| 0.0042275 | 0.0020885 | 0.0016729 | 0.0025968 | 0.0009153 | 0.0016509 | 0.0044669 | 0.0028943 | 0.0046515 | 0.0021952 | 0.0090897 | 0.007241  | 0.0052175 |
| 0.0029631 | 0.0021916 | 0.0016849 | 0.0018742 | 0.0024747 | 0.0018253 | 0.0071464 | 0.0036586 | 0.00608   | 0.0032717 | 0.005768  | 0.0085389 | 0.0055464 |
| 0.003726  | 0.001941  | 0.0016725 | 0.0020555 | 0.0017654 | 0.0013319 | 0.0073538 | 0.0030196 | 0.0053095 | 0.002546  | 0.0046801 | 0.0087327 | 0.0055027 |
| 0.0039053 | 0.002014  | 0.0016129 | 0.0021764 | 0.0019128 | 0.0016807 | 0.0069222 | 0.003254  | 0.0056714 | 0.0034163 | 0.0049298 | 0.0091415 | 0.0055522 |
| 0.0026802 | 0.0020122 | 0.0012261 | 0.0025718 | 0.002071  | 0.0016192 | 0.0067854 | 0.0029206 | 0.0053284 | 0.0035681 | 0.0044877 | 0.0075703 | 0.0058865 |
| 0.0038109 | 0.0019783 | 0.0011942 | 0.0019528 | 0.0013565 | 0.0012918 | 0.0071259 | 0.0036405 | 0.0062326 | 0.0030457 | 0.00523   | 0.0070513 | 0.0054346 |
| 0.0032476 | 0.0020086 | 0.0014669 | 0.0025772 | 0.0014651 | 0.0013221 | 0.0075552 | 0.0030534 | 0.0063891 | 0.0043533 | 0.0039326 | 0.0082875 | 0.0043583 |
| 0.0032758 | 0.0019933 | 0.0013929 | 0.0018517 | 0.0014318 | 0.0014385 | 0.0067968 | 0.0038055 | 0.0059377 | 0.0042256 | 0.0051296 | 0.0077842 | 0.0054551 |
| 0.0030231 | 0.0020124 | 0.0015872 | 0.0025581 | 0.001836  | 0.0013256 | 0.0065764 | 0.003273  | 0.005374  | 0.0036086 | 0.004174  | 0.0081867 | 0.0045053 |
| 0.0031874 | 0.0022885 | 0.0016958 | 0.0020306 | 0.001653  | 0.0013863 | 0.0062304 | 0.0049676 | 0.0062903 | 0.0050018 | 0.0053539 | 0.0060101 | 0.0056803 |
| 0.0029547 | 0.0021708 | 0.001451  | 0.0019396 | 0.0012403 | 0.0011512 | 0.0061727 | 0.0043887 | 0.006169  | 0.0082523 | 0.0048912 | 0.0054671 | 0.0062657 |
| 0.003524  | 0.0022205 | 0.0013735 | 0.0018931 | 0.0014681 | 0.0014167 | 0.0068218 | 0.0037862 | 0.0062021 | 0.0040392 | 0.005641  | 0.0076899 | 0.0058601 |
| 0.0032289 | 0.0025871 | 0.0014897 | 0.002042  | 0.0013634 | 0.0013286 | 0.0068716 | 0.0043987 | 0.0059162 | 0.0040703 | 0.0058009 | 0.0071336 | 0.0057023 |
| 0.0032362 | 0.0025122 | 0.001441  | 0.0019747 | 0.0016139 | 0.0015661 | 0.0068932 | 0.0041457 | 0.006055  | 0.0036176 | 0.0058386 | 0.0074791 | 0.0057548 |
| 0.0033081 | 0.0025149 | 0.0014344 | 0.002194  | 0.0014783 | 0.001418  | 0.0068552 | 0.0040295 | 0.0057186 | 0.003984  | 0.0055973 | 0.00723   | 0.0058765 |
| 0.0031028 | 0.002461  | 0.0014199 | 0.0023142 | 0.001812  | 0.0014137 | 0.0079588 | 0.0040184 | 0.0055909 | 0.0033648 | 0.0045429 | 0.0069243 | 0.0051264 |
| 0.003074  | 0.0027018 | 0.0023916 | 0.0021901 | 0.0028651 | 0.0025674 | 0.0069745 | 0.0015998 | 0.0024525 | 0.0034534 | 0.0045178 | 0.0065992 | 0.0103432 |
| 0.0062839 | 0.0014181 | 0.0032141 | 0.0021912 | 0.0020566 | 0.0014365 | 0.0047609 | 0.0026843 | 0.0051259 | 0.000869  | 0.0049002 | 0.0074628 | 0.0033409 |
| 0.0041422 | 0.0022534 | 0.0034367 | 0.0018684 | 0.0020834 | 0.0018388 | 0.0070541 | 0.0028099 | 0.0050568 | 0.0021297 | 0.0041834 | 0.0075817 | 0.0066303 |
| 0.0047908 | 0.0019181 | 0.0047504 | 0.0012586 | 0.0012656 | 0.0012308 | 0.0058841 | 0.0027399 | 0.0046446 | 0.0017015 | 0.0047565 | 0.0069143 | 0.0052804 |
| 0.0027024 | 0.0013065 | 0.001705  | 0.0039068 | 0.0010127 | 0.0014518 | 0.0045195 | 0.0030462 | 0.0050334 | 0.0011833 | 0.0048141 | 0.0082234 | 0.0041866 |
| 0.0038606 | 0.0021723 | 0.0015928 | 0.002205  | 0.0013364 | 0.0012561 | 0.0075828 | 0.0031571 | 0.0051883 | 0.001744  | 0.0036912 | 0.0089044 | 0.0061518 |
| 0.0059796 | 0.0018905 | 0.0017561 | 0.0055593 | 0.001277  | 0.0007693 | 0.0066593 | 0.0030712 | 0.0050335 | 0.0019607 | 0.0054465 | 0.0079783 | 0.0040413 |
| 0.0016649 | 0.0009996 | 0.0011532 | 0.0033885 | 0.0009459 | 0.0038687 | 0.0040453 | 0.0056325 | 0.0049587 | 0.002446  | 0.0022357 | 0.004144  | 0.0030971 |
| 0.0036407 | 0.0019075 | 0.0018678 | 0.0019993 | 0.0018298 | 0.0034633 | 0.0064677 | 0.0035432 | 0.0035703 | 0.0020446 | 0.0026571 | 0.0029613 | 0.0012748 |
| 0.0014412 | 0.0062526 | 0.0023243 | 0.0048191 | 0.0017766 | 0.0011286 | 0.0043271 | 0.0017251 | 0.002456  | 0.0024801 | 0.0049502 | 0.0058965 | 0.0048232 |
| 0.0022803 | 0.0045923 | 0.0037979 | 0.0039718 | 0.0027881 | 0.0019978 | 0.0038456 | 0.0020121 | 0.003282  | 0.0004577 | 0.0065613 | 0.0027667 | 0.0023302 |

|           |           |           |           |           |           |           |           |           |           |           |           |           |
|-----------|-----------|-----------|-----------|-----------|-----------|-----------|-----------|-----------|-----------|-----------|-----------|-----------|
| 0.002782  | 0.0051741 | 0.0027335 | 0.0053758 | 0.0030853 | 0.0031097 | 0.0027259 | 0.0024667 | 0.003894  | 0.0045311 | 0.0071795 | 0.0040793 | 0.0055548 |
| 0.0012768 | 0.0037849 | 0.0014103 | 0.0025742 | 0.0048988 | 0.0041824 | 0.0019051 | 0.0044836 | 0.0043418 | 0.0031604 | 0.0059322 | 0.0031355 | 0.0092038 |
| 0.0008003 | 0.0036825 | 0.0012257 | 0.0032523 | 0.0036521 | 0.0028676 | 0.0024825 | 0.0047719 | 0.0039562 | 0.0035542 | 0.0047571 | 0.0027803 | 0.010495  |
| 0.0013166 | 0.003466  | 0.0009016 | 0.0053209 | 0.0054903 | 0.0043314 | 0.0038815 | 0.004417  | 0.0053119 | 0.0030078 | 0.0060845 | 0.0018552 | 0.0074805 |
| 0.0012706 | 0.0025467 | 0.0010764 | 0.0056874 | 0.0016733 | 0.0015364 | 0.0063767 | 0.0061693 | 0.0046469 | 0.0023251 | 0.0015591 | 0.0027076 | 0.0065213 |
| 0.001439  | 0.0018967 | 0.0012806 | 0.0026078 | 0.0020037 | 0.0017967 | 0.0006568 | 0.013104  | 0.0043146 | 0.0032325 | 0.0062931 | 0.0041975 | 0.0044655 |
| 0.0007472 | 0.0014356 | 0.0015293 | 0.0012609 | 0.0011844 | 0.0013914 | 0.0047238 | 0.0039925 | 0.0045447 | 0.001498  | 0.0033216 | 0.0037121 | 0.0050224 |
| 0.0027506 | 0.0022638 | 0.0017387 | 0.0020465 | 0.002212  | 0.0018309 | 0.0043565 | 0.0047816 | 0.0043663 | 0.0047069 | 0.0053035 | 0.004028  | 0.0036566 |
| 0.002192  | 0.0013839 | 0.0016265 | 0.0024834 | 0.0037564 | 0.0023656 | 0.0033864 | 0.0054568 | 0.0046337 | 0.0050727 | 0.0037057 | 0.002697  | 0.002346  |
| 0.0020593 | 0.0018064 | 0.0019408 | 0.0020481 | 0.0024313 | 0.0030494 | 0.0035187 | 0.0044623 | 0.0047649 | 0.0042441 | 0.0044913 | 0.0034086 | 0.0035913 |
| 0.0044978 | 0.0016878 | 0.0015636 | 0.0020498 | 0.0023091 | 0.0030219 | 0.0049501 | 0.0037157 | 0.0035996 | 0.0029167 | 0.0035991 | 0.0037122 | 0.0028603 |
| 0.002936  | 0.0019225 | 0.0010325 | 0.0021831 | 0.0013098 | 0.0016915 | 0.0057332 | 0.0029922 | 0.0041211 | 0.0015062 | 0.0035828 | 0.0024185 | 0.0030452 |
| 0.002961  | 0.0022793 | 0.0047273 | 0.0016817 | 0.0019272 | 0.0013711 | 0.0049691 | 0.0026478 | 0.0039653 | 0.0015436 | 0.0053025 | 0.0039155 | 0.0019658 |
| 0.0027585 | 0.0023232 | 0.0013572 | 0.002376  | 0.0021423 | 0.0029795 | 0.0054166 | 0.0026239 | 0.0037892 | 0.001981  | 0.006073  | 0.0033847 | 0.0015961 |
| 0.0032195 | 0.0016396 | 0.0010691 | 0.0018552 | 0.0031542 | 0.0023733 | 0.0073609 | 0.0026219 | 0.0027999 | 0.0016519 | 0.006487  | 0.0036107 | 0.001556  |
| 0.0055868 | 0.0011379 | 0.0009881 | 0.0015354 | 0.0029329 | 0.0026454 | 0.0045164 | 0.0029111 | 0.0022799 | 0.0043072 | 0.0017748 | 0.0028466 | 0.0016533 |
| 0.0035698 | 0.0015952 | 0.0026421 | 0.0014331 | 0.0014563 | 0.0010885 | 0.0040797 | 0.0022374 | 0.0033488 | 0.001134  | 0.002373  | 0.003797  | 0.0022718 |
| 0.0040529 | 0.0013923 | 0.0012912 | 0.0020847 | 0.0012615 | 0.0012003 | 0.0045685 | 0.0025294 | 0.0034074 | 0.001385  | 0.0034659 | 0.0028202 | 0.0021644 |
| 0.0028664 | 0.0012416 | 0.0010146 | 0.0016893 | 0.0017693 | 0.0014614 | 0.0063819 | 0.0029817 | 0.0033952 | 0.0014749 | 0.0028404 | 0.0022135 | 0.0021923 |
| 0.002844  | 0.0010352 | 0.0010253 | 0.0018027 | 0.0025399 | 0.0025382 | 0.0040094 | 0.0029608 | 0.003299  | 0.0024983 | 0.0033412 | 0.0022486 | 0.0009978 |
| 0.0041386 | 0.0034208 | 0.0019716 | 0.0008417 | 0.0024891 | 0.0019492 | 0.0040215 | 0.0039871 | 0.0024619 | 0.0020357 | 0.0037377 | 0.0026024 | 0.0026507 |
| 0.0037987 | 0.0023053 | 0.0009195 | 0.0023376 | 0.002367  | 0.0024277 | 0.0068102 | 0.0039312 | 0.0036311 | 0.0026769 | 0.0030519 | 0.0019671 | 0.0030067 |
| 0.0051228 | 0.0028953 | 0.0030125 | 0.0047353 | 0.0055837 | 0.0084276 | 0.0034748 | 0.003464  | 0.0019959 | 0.0021452 | 0.0038374 | 0.0027649 | 0.0027254 |
| 0.0049384 | 0.0028163 | 0.0031792 | 0.0048261 | 0.0055827 | 0.0083134 | 0.0034262 | 0.003495  | 0.0020108 | 0.0023697 | 0.003742  | 0.0026698 | 0.0027085 |
| 0.0039625 | 0.0039753 | 0.0016197 | 0.0059753 | 0.0044345 | 0.0049666 | 0.0025069 | 0.002551  | 0.003793  | 0.0040449 | 0.0052312 | 0.0034776 | 0.0024944 |
| 0.0034299 | 0.002924  | 0.002472  | 0.0040525 | 0.0057629 | 0.0044783 | 0.0031305 | 0.0035788 | 0.0028347 | 0.0038442 | 0.0039555 | 0.0043232 | 0.0032865 |
| 0.0029079 | 0.0027435 | 0.0017777 | 0.0023024 | 0.0043233 | 0.0055044 | 0.002649  | 0.0018954 | 0.0025937 | 0.0038787 | 0.0079727 | 0.0072466 | 0.0028318 |
| 0.002824  | 0.0027079 | 0.0016123 | 0.0025762 | 0.0052432 | 0.0037812 | 0.0024579 | 0.0016251 | 0.0024287 | 0.0032784 | 0.0083383 | 0.0063439 | 0.0026412 |
| 0.0030957 | 0.0018886 | 0.0038086 | 0.0008538 | 0.0029793 | 0.0041128 | 0.0040894 | 0.0049772 | 0.0039825 | 0.0106124 | 0.0040697 | 0.00474   | 0.0081789 |
| 0.0018284 | 0.0023564 | 0.0037769 | 0.0009795 | 0.0029179 | 0.004434  | 0.0041787 | 0.0072182 | 0.0047723 | 0.0092094 | 0.0066302 | 0.0056845 | 0.0059609 |
| 0.001699  | 0.0026318 | 0.0034732 | 0.0012499 | 0.0045856 | 0.0025828 | 0.0039743 | 0.0094287 | 0.0050714 | 0.0090519 | 0.0061462 | 0.0046612 | 0.0054323 |
| 0.006121  | 0.0019214 | 0.0018708 | 0.0048094 | 0.0045558 | 0.002883  | 0.0038438 | 0.0051705 | 0.0034487 | 0.0030896 | 0.0053727 | 0.0039571 | 0.0016946 |
| 0.0045207 | 0.0020256 | 0.0023292 | 0.0034939 | 0.0029729 | 0.0045978 | 0.0041511 | 0.003737  | 0.0032503 | 0.0060321 | 0.0041969 | 0.0055669 | 0.0027051 |
| 0.0034227 | 0.0019731 | 0.0022403 | 0.0035428 | 0.0044616 | 0.0045922 | 0.0041033 | 0.0032522 | 0.0029575 | 0.0072962 | 0.0038438 | 0.0037746 | 0.0033689 |
| 0.0047179 | 0.0019361 | 0.0012968 | 0.0014909 | 0.0019029 | 0.0021879 | 0.0043479 | 0.0044638 | 0.0037497 | 0.0028791 | 0.0034612 | 0.0041798 | 0.0026168 |
| 0.0041421 | 0.0024684 | 0.0025948 | 0.0042893 | 0.0023204 | 0.0016999 | 0.0057657 | 0.0027024 | 0.0034204 | 0.0076506 | 0.0029136 | 0.004526  | 0.0032985 |

| SPR_08    | SPR_09    | SPR_10    | SPR_11    | SPR_12    | SPR_13    | SPR_14    | SPR_15    | SPR_16    | SPR_17    | SPR_19    | SPR_20    | SPR_21    |
|-----------|-----------|-----------|-----------|-----------|-----------|-----------|-----------|-----------|-----------|-----------|-----------|-----------|
| 0.0016755 | 0.0012391 | 0.0035445 | 0.0008147 | 0.0013173 | 0.002688  | 0.0034518 | 0.0067435 | 0.0070247 | 0.0034061 | 0.0034053 | 0.0041669 | 0.0026584 |
| 0.0018798 | 0.0040093 | 0.0008467 | 0.0020993 | 0.0025292 | 0.0005977 | 0.0049334 | 0.0010188 | 0.0035788 | 0.005318  | 0.0064907 | 0.0051098 | 0.0021042 |
| 0.0042947 | 0.0013704 | 0.0009277 | 0.0006264 | 0.0039733 | 0.0035762 | 0.0074311 | 0.0041937 | 0.0015347 | 0.0010164 | 0.0065711 | 0.004777  | 0.001353  |
| 0.0043037 | 0.0014022 | 0.0009571 | 0.0005987 | 0.0035835 | 0.0039211 | 0.0074277 | 0.0042504 | 0.0015776 | 0.0010334 | 0.0065641 | 0.0048122 | 0.0014889 |
| 0.0014141 | 0.001288  | 0.0052763 | 0.0006466 | 0.0015821 | 0.0025979 | 0.0087197 | 0.0025141 | 0.0010074 | 0.005028  | 0.0053912 | 0.0013228 | 0.0012199 |
| 0.0015899 | 0.0014759 | 0.0059613 | 0.0006021 | 0.0015664 | 0.0027612 | 0.0086174 | 0.0024713 | 0.0009498 | 0.0062766 | 0.0046888 | 0.001355  | 0.0011877 |
| 0.0014346 | 0.0012431 | 0.0036916 | 0.0005142 | 0.0014988 | 0.0025641 | 0.0071476 | 0.0021719 | 0.0012026 | 0.0071917 | 0.0074563 | 0.0012017 | 0.0010006 |
| 0.0016917 | 0.0015786 | 0.0045622 | 0.0005017 | 0.0013329 | 0.0027435 | 0.0068765 | 0.0023596 | 0.00114   | 0.0081045 | 0.0058214 | 0.0016187 | 0.0010254 |
| 0.0010515 | 0.0008717 | 0.0017161 | 0.0023611 | 0.0030837 | 0.0031706 | 0.003177  | 0.0084155 | 0.001133  | 0.00126   | 0.0026515 | 0.0028106 | 0.0008669 |
| 0.0011454 | 0.0023678 | 0.0021739 | 0.0008242 | 0.0030706 | 0.0017031 | 0.0023813 | 0.0012083 | 0.0017206 | 0.001471  | 0.0041078 | 0.0019012 | 0.0008454 |
| 0.0017498 | 0.0025324 | 0.0025137 | 0.0017159 | 0.003337  | 0.0023535 | 0.0014137 | 0.0014119 | 0.0009474 | 0.0018307 | 0.0020797 | 0.0012481 | 0.0018639 |
| 0.0012495 | 0.0026593 | 0.0017202 | 0.0006655 | 0.0047237 | 0.0012447 | 0.0040586 | 0.0016983 | 0.0025668 | 0.0031938 | 0.0022244 | 0.0078996 | 0.0052071 |
| 0.0011245 | 0.0021641 | 0.0035682 | 0.0008458 | 0.0026771 | 0.0016424 | 0.0062313 | 0.0028358 | 0.0018974 | 0.0021546 | 0.0048441 | 0.0050052 | 0.0016757 |
| 0.00169   | 0.0021824 | 0.0047704 | 0.0013008 | 0.0036246 | 0.001135  | 0.0052562 | 0.001615  | 0.0017609 | 0.0031462 | 0.0021443 | 0.0043781 | 0.0019267 |
| 0.0013535 | 0.001436  | 0.0052141 | 0.0006207 | 0.0016345 | 0.002477  | 0.0037173 | 0.0020765 | 0.0031585 | 0.0027906 | 0.0040012 | 0.0060662 | 0.0026122 |
| 0.0024019 | 0.0024176 | 0.0020665 | 0.0010632 | 0.0026954 | 0.002022  | 0.0023442 | 0.0030127 | 0.003108  | 0.0014994 | 0.004844  | 0.0044722 | 0.0041136 |
| 0.0015925 | 0.001726  | 0.0076493 | 0.0013259 | 0.0018715 | 0.0039479 | 0.0050921 | 0.0017881 | 0.0029146 | 0.0045979 | 0.004771  | 0.0036607 | 0.00249   |
| 0.0012744 | 0.0023211 | 0.0072159 | 0.0008117 | 0.0015327 | 0.0047354 | 0.0129208 | 0.0012932 | 0.0061013 | 0.0060419 | 0.0097291 | 0.006218  | 0.002263  |
| 0.0011468 | 0.0024521 | 0.0049667 | 0.0005079 | 0.0016343 | 0.0048076 | 0.0074235 | 0.0029712 | 0.0042959 | 0.0068138 | 0.0042278 | 0.0076537 | 0.0030899 |
| 0.000834  | 0.0019987 | 0.0025626 | 0.0006682 | 0.0018101 | 0.0016857 | 0.0057545 | 0.0023244 | 0.0029995 | 0.0046409 | 0.0043344 | 0.0080277 | 0.0007165 |
| 0.0013844 | 0.0018842 | 0.0068861 | 0.0007687 | 0.0016554 | 0.0032633 | 0.0058112 | 0.0015551 | 0.0062351 | 0.0057059 | 0.0073904 | 0.009559  | 0.0017611 |
| 0.001317  | 0.0026824 | 0.0037423 | 0.0007497 | 0.001652  | 0.0051727 | 0.0055185 | 0.0018712 | 0.0051002 | 0.00792   | 0.0081719 | 0.0068789 | 0.0013878 |
| 0.0012206 | 0.00268   | 0.0044084 | 0.0006036 | 0.0017337 | 0.0051437 | 0.0052134 | 0.0019108 | 0.0053775 | 0.0071864 | 0.0088521 | 0.0065304 | 0.0013281 |
| 0.00115   | 0.001145  | 0.0054583 | 0.0007917 | 0.0013432 | 0.0041981 | 0.0071051 | 0.0014884 | 0.0031752 | 0.0045804 | 0.0044224 | 0.0057492 | 0.0018025 |
| 0.0010515 | 0.001445  | 0.0076632 | 0.0009356 | 0.001518  | 0.0040948 | 0.0055463 | 0.0014575 | 0.0052206 | 0.0044565 | 0.0037349 | 0.0083452 | 0.0017312 |
| 0.0011004 | 0.0025413 | 0.0025212 | 0.0006873 | 0.0020932 | 0.0006364 | 0.0012719 | 0.0039346 | 0.0010577 | 0.0017379 | 0.0054264 | 0.0032475 | 0.0008011 |
| 0.0017523 | 0.003026  | 0.0019994 | 0.0010757 | 0.0043777 | 0.0012621 | 0.0046482 | 0.0016655 | 0.0026727 | 0.0011284 | 0.0163126 | 0.003322  | 0.0007649 |
| 0.001255  | 0.002044  | 0.0019395 | 0.0009739 | 0.0035724 | 0.0027012 | 0.0011369 | 0.0063676 | 0.0025511 | 0.0011762 | 0.0049933 | 0.0047753 | 0.002431  |
| 0.001748  | 0.0025281 | 0.0027139 | 0.0017569 | 0.0024666 | 0.0022192 | 0.0024577 | 0.0017803 | 0.0017673 | 0.002212  | 0.0052065 | 0.0026191 | 0.0018664 |
| 0.0018807 | 0.002299  | 0.0028198 | 0.0016158 | 0.0026748 | 0.0021473 | 0.0026339 | 0.0017717 | 0.0013135 | 0.0015416 | 0.0060839 | 0.0026543 | 0.0017206 |
| 0.001707  | 0.0020984 | 0.0026544 | 0.0015114 | 0.0023061 | 0.0022689 | 0.003292  | 0.0017796 | 0.0019558 | 0.0019957 | 0.0056692 | 0.0024735 | 0.0015585 |
| 0.0011373 | 0.0018215 | 0.0021095 | 0.0011009 | 0.0028466 | 0.0030173 | 0.0077338 | 0.0014669 | 0.0026459 | 0.0017257 | 0.0029673 | 0.0030232 | 0.0018243 |
| 0.001177  | 0.0021332 | 0.0018649 | 0.0011344 | 0.0035538 | 0.0029109 | 0.0038358 | 0.0022354 | 0.0022257 | 0.001502  | 0.0021881 | 0.0022073 | 0.0016836 |
| 0.0016054 | 0.0023848 | 0.0018131 | 0.0015926 | 0.0029226 | 0.0023609 | 0.0039427 | 0.0029921 | 0.001902  | 0.002411  | 0.0038164 | 0.0043981 | 0.0005846 |
| 0.0013301 | 0.0023821 | 0.0018771 | 0.0009253 | 0.0035384 | 0.0023468 | 0.0045567 | 0.0039376 | 0.0008488 | 0.0027997 | 0.0023965 | 0.0036806 | 0.0009665 |
| 0.0010533 | 0.0031379 | 0.0044369 | 0.0020881 | 0.000754  | 0.004879  | 0.0027807 | 0.0032247 | 0.002938  | 0.0028168 | 0.0019816 | 0.0035863 | 0.0019583 |
| 0.0014646 | 0.0023998 | 0.0035116 | 0.0017733 | 0.002742  | 0.0028012 | 0.0038157 | 0.0022613 | 0.0011956 | 0.0018205 | 0.0017609 | 0.0012439 | 0.0024583 |
| 0.0014763 | 0.0024652 | 0.0035926 | 0.001792  | 0.0030024 | 0.0026683 | 0.0036972 | 0.0019737 | 0.0010823 | 0.0017881 | 0.0014819 | 0.0011574 | 0.0021653 |
| 0.0006256 | 0.00214   | 0.0031112 | 0.0008449 | 0.0018221 | 0.0035697 | 0.0146501 | 0.0023884 | 0.0021932 | 0.0027898 | 0.0027751 | 0.0024049 | 0.0016152 |
| 0.0006142 | 0.0021543 | 0.0031271 | 0.0008585 | 0.0018437 | 0.0035806 | 0.0144295 | 0.0023816 | 0.0021858 | 0.0028047 | 0.0027904 | 0.002426  | 0.001641  |
| 0.0010021 | 0.0030273 | 0.0025682 | 0.0006552 | 0.0020704 | 0.00354   | 0.0049352 | 0.0018611 | 0.0028684 | 0.0005656 | 0.0024751 | 0.0021176 | 0.0018534 |
| 0.0006748 | 0.0022554 | 0.0025542 | 0.000571  | 0.00204   | 0.0035596 | 0.009396  | 0.0022607 | 0.0023921 | 0.0023282 | 0.0014201 | 0.0033071 | 0.002009  |
| 0.0007254 | 0.0031693 | 0.0027342 | 0.0006343 | 0.0019816 | 0.0031316 | 0.0079745 | 0.0021307 | 0.0021054 | 0.0023471 | 0.0012935 | 0.0035992 | 0.0020025 |
| 0.0008872 | 0.0026699 | 0.002244  | 0.0005205 | 0.0030348 | 0.0021641 | 0.0070912 | 0.0015277 | 0.0024456 | 0.0018073 | 0.0015774 | 0.0030502 | 0.0022293 |
| 0.0006311 | 0.0028625 | 0.0022807 | 0.0003852 | 0.0030214 | 0.0025431 | 0.0063581 | 0.0016103 | 0.0025448 | 0.0021863 | 0.0016996 | 0.0034481 | 0.0025094 |
| 0.0019767 | 0.0050148 | 0.0066302 | 0.0007548 | 0.0011968 | 0.0024794 | 0.0086388 | 0.0029852 | 0.0019418 | 0.0009044 | 0.0027074 | 0.0029532 | 0.003269  |
| 0.0019386 | 0.0044538 | 0.0125759 | 0.0007992 | 0.0009581 | 0.0026631 | 0.009195  | 0.0015601 | 0.0014623 | 0.0019445 | 0.0033704 | 0.0034392 | 0.0018671 |
| 0.0009768 | 0.0035067 | 0.0064376 | 0.0008131 | 0.0010453 | 0.0034147 | 0.0077559 | 0.0019515 | 0.0019274 | 0.002159  | 0.0035007 | 0.0030612 | 0.0022329 |
| 0.0009601 | 0.0030672 | 0.006802  | 0.0007486 | 0.0009526 | 0.0037126 | 0.0083817 | 0.0018365 | 0.0020771 | 0.0026771 | 0.0033961 | 0.0030248 | 0.0022511 |
| 0.0011894 | 0.0019722 | 0.0051712 | 0.0025446 | 0.003629  | 0.0009558 | 0.0035535 | 0.0012068 | 0.0046938 | 0.0020572 | 0.0017523 | 0.0041507 | 0.0033754 |
| 0.0010895 | 0.0023069 | 0.0070289 | 0.0006238 | 0.000859  | 0.0036633 | 0.0088488 | 0.0025335 | 0.0012995 | 0.0027683 | 0.0015899 | 0.0020829 | 0.0036592 |
| 0.0008975 | 0.002598  | 0.008761  | 0.0004808 | 0.0008794 | 0.0027377 | 0.0086631 | 0.0017864 | 0.0016995 | 0.0024184 | 0.0025314 | 0.0025822 | 0.0022698 |
| 0.000718  | 0.0021067 | 0.005291  | 0.0013184 | 0.0019988 | 0.0029065 | 0.0039543 | 0.0010367 | 0.0020018 | 0.0011742 | 0.0014992 | 0.0006658 | 0.003183  |
| 0.0014991 | 0.0027694 | 0.0073385 | 0.0003127 | 0.0008747 | 0.0030057 | 0.0034223 | 0.00234   | 0.0013324 | 0.0027673 | 0.0012576 | 0.0018361 | 0.0025963 |
| 0.0022299 | 0.0019984 | 0.0026696 | 0.0012615 | 0.0016773 | 0.002844  | 0.002845  | 0.0022086 | 0.0015719 | 0.0018933 | 0.0019536 | 0.0033161 | 0.0014259 |
| 0.0018964 | 0.0025511 | 0.0073392 | 0.0006052 | 0.0014801 | 0.0031457 | 0.005871  | 0.0017109 | 0.0013688 | 0.0021245 | 0.0022993 | 0.002339  | 0.0014638 |

|           |           |           |           |           |           |           |           |           |           |           |           |           |
|-----------|-----------|-----------|-----------|-----------|-----------|-----------|-----------|-----------|-----------|-----------|-----------|-----------|
| 0.0020704 | 0.0024616 | 0.0071458 | 0.0006229 | 0.0016378 | 0.0036609 | 0.0060322 | 0.0013711 | 0.0005053 | 0.0024352 | 0.002478  | 0.0023978 | 0.0015435 |
| 0.0020509 | 0.001369  | 0.0057416 | 0.0004562 | 0.0009171 | 0.0036156 | 0.0091231 | 0.0011035 | 0.0013991 | 0.0028518 | 0.0024557 | 0.0040974 | 0.0026911 |
| 0.0016658 | 0.0019869 | 0.0069231 | 0.0005198 | 0.0014409 | 0.0035562 | 0.0089264 | 0.0020507 | 0.0018785 | 0.0023127 | 0.0041431 | 0.0026917 | 0.0019569 |
| 0.001582  | 0.0020284 | 0.0081083 | 0.0007585 | 0.0014564 | 0.0026339 | 0.0093391 | 0.0023084 | 0.0019406 | 0.0037    | 0.0021788 | 0.0048976 | 0.0019665 |
| 0.0017304 | 0.0022269 | 0.0080604 | 0.0008617 | 0.0016678 | 0.0025937 | 0.0078337 | 0.0024746 | 0.0019221 | 0.0038592 | 0.0025771 | 0.0054694 | 0.0018435 |
| 0.001023  | 0.0028915 | 0.0063102 | 0.000944  | 0.0028531 | 0.0010934 | 0.0065249 | 0.0020842 | 0.0022617 | 0.0031092 | 0.0025826 | 0.0071411 | 0.0011243 |
| 0.0010455 | 0.0025172 | 0.0037717 | 0.0007487 | 0.0017905 | 0.0026521 | 0.0109761 | 0.0014758 | 0.0024346 | 0.0059358 | 0.0019908 | 0.008528  | 0.0016568 |
| 0.0012474 | 0.0022163 | 0.0037496 | 0.0007784 | 0.0017074 | 0.0024121 | 0.0111156 | 0.0016372 | 0.0021182 | 0.0056925 | 0.0018679 | 0.0084082 | 0.001511  |
| 0.0010882 | 0.0017302 | 0.0028657 | 0.000622  | 0.0020558 | 0.0018149 | 0.008192  | 0.0013958 | 0.0024972 | 0.0041818 | 0.0032774 | 0.0087746 | 0.0015565 |
| 0.0010891 | 0.0020267 | 0.0031817 | 0.0007059 | 0.0018654 | 0.0018647 | 0.0074847 | 0.00153   | 0.0026967 | 0.0047855 | 0.0030445 | 0.0093289 | 0.0015838 |
| 0.0018401 | 0.0025817 | 0.0040079 | 0.0005135 | 0.0010226 | 0.0021949 | 0.0051146 | 0.0016802 | 0.0013999 | 0.0036399 | 0.0035434 | 0.0048007 | 0.0015219 |
| 0.0012905 | 0.0018182 | 0.0033241 | 0.000512  | 0.0018492 | 0.0024555 | 0.006086  | 0.0014256 | 0.0016141 | 0.0042901 | 0.0040565 | 0.0044077 | 0.0012583 |
| 0.0020057 | 0.0023425 | 0.0036211 | 0.0005025 | 0.0015236 | 0.0019972 | 0.0096677 | 0.0012158 | 0.0025137 | 0.0029117 | 0.0042569 | 0.0032671 | 0.0013153 |
| 0.0008621 | 0.0017647 | 0.0025084 | 0.0006926 | 0.0031417 | 0.0012472 | 0.0040626 | 0.0015761 | 0.0025884 | 0.0035777 | 0.0032293 | 0.0053636 | 0.0015776 |
| 0.0013043 | 0.0012543 | 0.0030347 | 0.0007566 | 0.0026374 | 0.0029998 | 0.0063343 | 0.0011562 | 0.0018503 | 0.0024911 | 0.0033734 | 0.007354  | 0.0013031 |
| 0.0012444 | 0.00169   | 0.0029421 | 0.0010602 | 0.0019933 | 0.0036131 | 0.0046294 | 0.001454  | 0.0026488 | 0.0026881 | 0.0024883 | 0.0048664 | 0.0020292 |
| 0.0013376 | 0.0019423 | 0.0028443 | 0.001089  | 0.0021591 | 0.0030592 | 0.0042781 | 0.001625  | 0.0027357 | 0.0021587 | 0.0024492 | 0.0048815 | 0.002158  |
| 0.0016665 | 0.0037714 | 0.0027861 | 0.0008088 | 0.0025336 | 0.0016136 | 0.0098207 | 0.0023712 | 0.0024696 | 0.0033559 | 0.0022806 | 0.0095916 | 0.0012577 |
| 0.0019148 | 0.0039561 | 0.0024978 | 0.0009726 | 0.0025312 | 0.0016309 | 0.008697  | 0.0025613 | 0.0017966 | 0.0029359 | 0.0021546 | 0.0091412 | 0.0011487 |
| 0.0013417 | 0.0036931 | 0.0030251 | 0.0005693 | 0.0035727 | 0.0032673 | 0.0071734 | 0.0031391 | 0.002197  | 0.0032285 | 0.0036286 | 0.0038573 | 0.0046554 |
| 0.0014062 | 0.0020497 | 0.0023653 | 0.0006439 | 0.0025225 | 0.0029651 | 0.0063978 | 0.0021837 | 0.0017511 | 0.0037188 | 0.0010687 | 0.0054812 | 0.0060588 |
| 0.0013693 | 0.0023259 | 0.002134  | 0.0007001 | 0.0028115 | 0.0028627 | 0.0058679 | 0.0022798 | 0.0016468 | 0.0030973 | 0.0011682 | 0.0048308 | 0.0065105 |
| 0.0012507 | 0.0022984 | 0.0020868 | 0.0005389 | 0.0034987 | 0.0022181 | 0.0035748 | 0.0017995 | 0.0017447 | 0.0036043 | 0.0012871 | 0.0078995 | 0.0062642 |
| 0.0012928 | 0.0026029 | 0.0019448 | 0.0006537 | 0.0037525 | 0.0020807 | 0.0031071 | 0.0018727 | 0.0016961 | 0.002698  | 0.0011956 | 0.0067295 | 0.0057446 |
| 0.0011737 | 0.0023673 | 0.0028217 | 0.001144  | 0.0017039 | 0.0022216 | 0.0050649 | 0.0013484 | 0.0013131 | 0.0027342 | 0.0019697 | 0.0020437 | 0.0015517 |
| 0.0024939 | 0.0038722 | 0.0029741 | 0.0006948 | 0.0025478 | 0.0030846 | 0.0076558 | 0.0011016 | 0.0014097 | 0.0025554 | 0.0015971 | 0.0029414 | 0.0035127 |
| 0.0020196 | 0.0042865 | 0.003364  | 0.0004403 | 0.0024591 | 0.0031183 | 0.0038564 | 0.001018  | 0.0013358 | 0.0029833 | 0.0014673 | 0.0030965 | 0.0025918 |
| 0.0023341 | 0.0046861 | 0.0029994 | 0.000365  | 0.0037118 | 0.0027635 | 0.0029354 | 0.0010657 | 0.0013781 | 0.0026087 | 0.0013838 | 0.0029387 | 0.0025602 |
| 0.0013435 | 0.0024195 | 0.0048997 | 0.0006694 | 0.0015652 | 0.0052039 | 0.0074985 | 0.0018701 | 0.0015472 | 0.0019411 | 0.0026289 | 0.0025506 | 0.0013659 |
| 0.0017492 | 0.0024335 | 0.003695  | 0.0005033 | 0.0015545 | 0.0027667 | 0.0041236 | 0.0016307 | 0.0014963 | 0.0037014 | 0.0025342 | 0.0045239 | 0.0011734 |
| 0.0007351 | 0.0019715 | 0.0047842 | 0.0007788 | 0.0011427 | 0.0035035 | 0.0036871 | 0.0012277 | 0.0014627 | 0.0050041 | 0.0019745 | 0.003225  | 0.0019112 |
| 0.0014421 | 0.0024148 | 0.0034725 | 0.000641  | 0.0020316 | 0.0027025 | 0.0029939 | 0.0014861 | 0.0010202 | 0.002202  | 0.0023302 | 0.0024266 | 0.0011493 |
| 0.0006645 | 0.001702  | 0.0030958 | 0.0005591 | 0.0020132 | 0.0047941 | 0.0102582 | 0.0018307 | 0.001457  | 0.0028844 | 0.002004  | 0.0026127 | 0.0018648 |
| 0.0008575 | 0.0017875 | 0.0029653 | 0.0005336 | 0.0022578 | 0.003526  | 0.0070001 | 0.0016952 | 0.001701  | 0.002667  | 0.0022839 | 0.0034414 | 0.0014933 |
| 0.0008465 | 0.0017284 | 0.0035844 | 0.0004283 | 0.0023589 | 0.0048363 | 0.0069767 | 0.0013411 | 0.0018679 | 0.0038514 | 0.0023616 | 0.0042627 | 0.001438  |
| 0.0013801 | 0.0016042 | 0.0050627 | 0.0004059 | 0.0016569 | 0.0066013 | 0.0077926 | 0.0020117 | 0.0019804 | 0.0043369 | 0.0019654 | 0.003751  | 0.0020353 |
| 0.0021388 | 0.0022784 | 0.0026279 | 0.0008028 | 0.0016055 | 0.0036946 | 0.0059008 | 0.0013805 | 0.0015847 | 0.0040941 | 0.0020858 | 0.0030524 | 0.0014202 |
| 0.0019627 | 0.0024901 | 0.0027943 | 0.0006481 | 0.0017064 | 0.0034778 | 0.0036254 | 0.0009453 | 0.0018092 | 0.006749  | 0.0039528 | 0.005473  | 0.0012091 |
| 0.0018211 | 0.0029504 | 0.003477  | 0.0006514 | 0.0028038 | 0.0035849 | 0.0049226 | 0.0016741 | 0.0013205 | 0.0030883 | 0.0032933 | 0.002091  | 0.0012969 |
| 0.0017079 | 0.001515  | 0.0039228 | 0.0012068 | 0.0020329 | 0.0048227 | 0.0033699 | 0.0021797 | 0.0008632 | 0.0028937 | 0.0005302 | 0.0027838 | 0.0033974 |
| 0.0021886 | 0.0028249 | 0.0024491 | 0.0030968 | 0.0031293 | 0.0006802 | 0.0017108 | 0.0025189 | 0.0014001 | 0.0008024 | 0.0012143 | 0.0010427 | 0.0027052 |
| 0.0013905 | 0.0009487 | 0.0014512 | 0.0052813 | 0.0024623 | 0.0033187 | 0.001659  | 0.0019472 | 0.0009522 | 0.0012005 | 0.0010633 | 0.0012319 | 0.0011111 |
| 0.0020804 | 0.0010437 | 0.0022493 | 0.010096  | 0.0034199 | 0.0053204 | 0.0015886 | 0.0030921 | 0.0011898 | 0.0011167 | 0.0012535 | 0.0009632 | 0.0017042 |
| 0.0021617 | 0.0021398 | 0.0022238 | 0.0082424 | 0.0025102 | 0.0051533 | 0.0011396 | 0.0024115 | 0.0012217 | 0.0009904 | 0.0014999 | 0.0007603 | 0.0016882 |
| 0.0027289 | 0.0029774 | 0.0019859 | 0.0007313 | 0.0063614 | 0.0037831 | 0.0016463 | 0.0018177 | 0.0023897 | 0.0010704 | 0.0018855 | 0.0007592 | 0.0009594 |
| 0.0022554 | 0.0024622 | 0.0014805 | 0.000549  | 0.0075633 | 0.0010433 | 0.0010929 | 0.0024941 | 0.0036337 | 0.0008371 | 0.0045079 | 0.0022101 | 0.0010402 |
| 0.0028963 | 0.0031307 | 0.0018565 | 0.0017078 | 0.0043544 | 0.0013563 | 0.0011173 | 0.003144  | 0.0011127 | 0.0009762 | 0.0012794 | 0.0015325 | 0.0006347 |
| 0.0028557 | 0.0028155 | 0.0016724 | 0.0012279 | 0.0051457 | 0.0017025 | 0.0014226 | 0.0043395 | 0.0013019 | 0.0006082 | 0.0021248 | 0.0009705 | 0.0017784 |
| 0.0018961 | 0.0024994 | 0.0014826 | 0.0034748 | 0.0049737 | 0.0020255 | 0.0016185 | 0.0037624 | 0.0012186 | 0.0010975 | 0.0017101 | 0.0015713 | 0.0014085 |
| 0.0020128 | 0.0006828 | 0.0016535 | 0.0010211 | 0.0033238 | 0.0017621 | 0.0015973 | 0.002842  | 0.0013413 | 0.0014273 | 0.001299  | 0.0018988 | 0.0015395 |
| 0.0019852 | 0.0004852 | 0.0016814 | 0.0014902 | 0.0032023 | 0.0017002 | 0.0016646 | 0.0031138 | 0.0047154 | 0.0014785 | 0.0015301 | 0.0020303 | 0.0015566 |
| 0.00536   | 0.0080718 | 0.0041492 | 0.0060634 | 0.0042823 | 0.0041597 | 0.0016709 | 0.0051777 | 0.0023183 | 0.0016363 | 0.0017666 | 0.0024763 | 0.0048587 |
| 0.0062587 | 0.0073915 | 0.0053721 | 0.0053259 | 0.0048887 | 0.0052661 | 0.0017158 | 0.0051697 | 0.0029684 | 0.0025686 | 0.0026634 | 0.0036992 | 0.0062197 |
| 0.0053595 | 0.0085339 | 0.0049022 | 0.0046954 | 0.004733  | 0.0065368 | 0.0016974 | 0.0052535 | 0.0024452 | 0.0029409 | 0.002537  | 0.0039441 | 0.0056952 |
| 0.0089294 | 0.0076024 | 0.0040225 | 0.0045514 | 0.0048363 | 0.0047637 | 0.0008837 | 0.0037024 | 0.0019807 | 0.0019039 | 0.0013314 | 0.0027503 | 0.0050052 |
| 0.0053005 | 0.0066282 | 0.0045561 | 0.0055985 | 0.0037328 | 0.0082588 | 0.0023618 | 0.0059455 | 0.0015309 | 0.0015163 | 0.0013963 | 0.0026527 | 0.006275  |
| 0.0051017 | 0.0100627 | 0.0056941 | 0.0064566 | 0.0030138 | 0.0051703 | 0.0012848 | 0.0042994 | 0.0015265 | 0.0010991 | 0.0012457 | 0.0027666 | 0.004734  |
| 0.003883  | 0.0078506 | 0.0034284 | 0.007405  | 0.0029849 | 0.0074599 | 0.0035221 | 0.0075029 | 0.0016205 | 0.0011485 | 0.0009876 | 0.0023227 | 0.0072761 |

|           |           |           |           |           |           |           |           |           |           |           |           |           |
|-----------|-----------|-----------|-----------|-----------|-----------|-----------|-----------|-----------|-----------|-----------|-----------|-----------|
| 0.0036863 | 0.0092942 | 0.0030192 | 0.0063907 | 0.0027886 | 0.0037926 | 0.0021217 | 0.0052666 | 0.0021112 | 0.0017697 | 0.0015861 | 0.0026298 | 0.0044323 |
| 0.0034986 | 0.0100023 | 0.0034446 | 0.0056862 | 0.0027752 | 0.004209  | 0.002371  | 0.0058907 | 0.0020546 | 0.0019466 | 0.0015139 | 0.0027936 | 0.0046033 |
| 0.0066544 | 0.0075697 | 0.0028002 | 0.0015732 | 0.0029933 | 0.0043204 | 0.0008111 | 0.0067447 | 0.0020071 | 0.0013688 | 0.0010326 | 0.002226  | 0.0051519 |
| 0.0049708 | 0.0072985 | 0.0020359 | 0.0058225 | 0.0041073 | 0.0045989 | 0.0022251 | 0.0070574 | 0.002933  | 0.0012496 | 0.0009516 | 0.0026389 | 0.005156  |
| 0.0043145 | 0.0083298 | 0.0025893 | 0.0061909 | 0.0032463 | 0.0047628 | 0.001892  | 0.006024  | 0.0022454 | 0.0012494 | 0.0011906 | 0.0023621 | 0.0050967 |
| 0.0045797 | 0.0064946 | 0.0028633 | 0.0079465 | 0.0033753 | 0.0063671 | 0.0021834 | 0.0080211 | 0.0020877 | 0.001349  | 0.0010361 | 0.0020953 | 0.0068632 |
| 0.0047829 | 0.0074158 | 0.0023715 | 0.0045316 | 0.0036738 | 0.0041743 | 0.001696  | 0.0067307 | 0.0026921 | 0.0015973 | 0.0014958 | 0.002317  | 0.0050162 |
| 0.0046924 | 0.0069538 | 0.0021975 | 0.0076944 | 0.0035288 | 0.0038691 | 0.0013147 | 0.0056321 | 0.0022698 | 0.0014651 | 0.0015686 | 0.0021213 | 0.0043997 |
| 0.0053991 | 0.0059663 | 0.0025902 | 0.0055431 | 0.0040627 | 0.0049092 | 0.0012072 | 0.0068084 | 0.0026564 | 0.0012164 | 0.0012745 | 0.0020566 | 0.0055972 |
| 0.0086973 | 0.003835  | 0.0016665 | 0.00824   | 0.0037251 | 0.0030102 | 0.0024215 | 0.0040414 | 0.003027  | 0.001171  | 0.0033668 | 0.0031228 | 0.0030476 |
| 0.0052365 | 0.0033436 | 0.001881  | 0.0084584 | 0.0058582 | 0.0033677 | 0.0005548 | 0.0043344 | 0.0024894 | 0.0014429 | 0.0019046 | 0.0013645 | 0.0046244 |
| 0.0059316 | 0.0030199 | 0.0017409 | 0.009099  | 0.0047772 | 0.0045503 | 0.0005798 | 0.0047847 | 0.0030732 | 0.0017322 | 0.0015553 | 0.0018994 | 0.0042972 |
| 0.0051028 | 0.0040988 | 0.0015042 | 0.0054333 | 0.0050481 | 0.0035158 | 0.0008366 | 0.004759  | 0.0032703 | 0.0012063 | 0.0021755 | 0.0018417 | 0.0045176 |
| 0.0051199 | 0.0037771 | 0.0022129 | 0.0050354 | 0.0042574 | 0.0083284 | 0.0010848 | 0.0052394 | 0.0025135 | 0.0015867 | 0.0015888 | 0.0023921 | 0.0050977 |
| 0.0042549 | 0.0020465 | 0.0035046 | 0.013315  | 0.0045383 | 0.0052811 | 0.0022327 | 0.0042346 | 0.0014441 | 0.0022527 | 0.0020609 | 0.0017103 | 0.0048147 |
| 0.0045173 | 0.0014784 | 0.0053769 | 0.0107497 | 0.004876  | 0.0044051 | 0.001505  | 0.0046884 | 0.0028152 | 0.0016919 | 0.0041368 | 0.0012039 | 0.0039337 |
| 0.009122  | 0.0049993 | 0.0033437 | 0.0064209 | 0.0039187 | 0.0024124 | 0.0009702 | 0.0048779 | 0.0016655 | 0.0014192 | 0.0010939 | 0.0024298 | 0.0070493 |
| 0.0043619 | 0.0059784 | 0.0032649 | 0.0087002 | 0.0032608 | 0.0058954 | 0.0017522 | 0.0067935 | 0.0019287 | 0.001868  | 0.00105   | 0.0019849 | 0.0071559 |
| 0.0048515 | 0.0048748 | 0.0039205 | 0.0086071 | 0.0038122 | 0.0051722 | 0.0013198 | 0.0043227 | 0.0019522 | 0.0024716 | 0.0014442 | 0.0026315 | 0.0054873 |
| 0.0040238 | 0.0065158 | 0.0039773 | 0.0099568 | 0.0032202 | 0.0051176 | 0.0027218 | 0.005205  | 0.0016786 | 0.0024774 | 0.0011583 | 0.0025198 | 0.0069468 |
| 0.0043312 | 0.0066598 | 0.0041529 | 0.0099749 | 0.003579  | 0.0053808 | 0.0019101 | 0.0045362 | 0.0016303 | 0.0023017 | 0.0013541 | 0.0032973 | 0.0059975 |
| 0.0047296 | 0.0076025 | 0.0058781 | 0.0103802 | 0.0031189 | 0.0047838 | 0.0019458 | 0.0040731 | 0.0021027 | 0.0045396 | 0.0018584 | 0.00391   | 0.004634  |
| 0.0060546 | 0.0042529 | 0.003705  | 0.0073819 | 0.0034917 | 0.0060939 | 0.0029952 | 0.0076616 | 0.0029623 | 0.003946  | 0.0030943 | 0.0049179 | 0.0087268 |
| 0.0062773 | 0.0045959 | 0.0042204 | 0.0070065 | 0.0048104 | 0.0054257 | 0.0020416 | 0.0057658 | 0.0039286 | 0.0039577 | 0.0033434 | 0.0048005 | 0.0068909 |
| 0.0063042 | 0.0039574 | 0.0035676 | 0.0056921 | 0.0039129 | 0.0029023 | 0.0008591 | 0.0065989 | 0.0036079 | 0.0060231 | 0.0019172 | 0.0025041 | 0.0044783 |
| 0.0044452 | 0.0038908 | 0.0039312 | 0.0091505 | 0.0033941 | 0.0056467 | 0.0015287 | 0.0053782 | 0.0020097 | 0.0028642 | 0.0008969 | 0.0024881 | 0.0066108 |
| 0.0048293 | 0.0030056 | 0.0030379 | 0.0055212 | 0.0033652 | 0.0051248 | 0.0009923 | 0.0052382 | 0.0020504 | 0.003407  | 0.0011074 | 0.0021101 | 0.0056559 |
| 0.0060411 | 0.0049314 | 0.0026997 | 0.0066792 | 0.0037673 | 0.0024654 | 0.0016313 | 0.0039603 | 0.00218   | 0.0020034 | 0.0016103 | 0.0016046 | 0.004494  |
| 0.0058668 | 0.0056212 | 0.0042146 | 0.0083098 | 0.0040508 | 0.0049376 | 0.0010815 | 0.0046064 | 0.0024147 | 0.0022249 | 0.0017768 | 0.0024387 | 0.0055407 |
| 0.0056159 | 0.0072582 | 0.0047496 | 0.0122101 | 0.0035    | 0.0031964 | 0.000943  | 0.0044017 | 0.0018201 | 0.0020032 | 0.0012518 | 0.0021647 | 0.0044788 |
| 0.0046721 | 0.0054709 | 0.002658  | 0.0056809 | 0.0039787 | 0.0041239 | 0.0010596 | 0.0038598 | 0.0021082 | 0.0032893 | 0.0019805 | 0.0024653 | 0.0043092 |
| 0.0059829 | 0.0036152 | 0.0021158 | 0.0064183 | 0.003165  | 0.0015594 | 0.0004875 | 0.0031768 | 0.0027326 | 0.0030232 | 0.001615  | 0.0020239 | 0.0042061 |
| 0.0044208 | 0.0056269 | 0.0031819 | 0.0085038 | 0.004234  | 0.0008319 | 0.0016158 | 0.0039355 | 0.0025906 | 0.0026161 | 0.0019424 | 0.0025579 | 0.0037123 |
| 0.0044249 | 0.0056326 | 0.0031837 | 0.0085182 | 0.0042373 | 0.0008313 | 0.0016168 | 0.0039382 | 0.0025916 | 0.0026169 | 0.0019427 | 0.0025586 | 0.0037148 |
| 0.0049922 | 0.0059081 | 0.0034    | 0.0081324 | 0.0048587 | 0.000878  | 0.0009147 | 0.0040184 | 0.003404  | 0.0034565 | 0.0023578 | 0.0025083 | 0.0033314 |
| 0.0050165 | 0.006123  | 0.0035582 | 0.0084173 | 0.0046173 | 0.0009726 | 0.0009268 | 0.0042205 | 0.003554  | 0.0038428 | 0.0023239 | 0.0027799 | 0.0034094 |
| 0.0050142 | 0.0061198 | 0.0035563 | 0.0084115 | 0.0046156 | 0.0009724 | 0.0009266 | 0.004219  | 0.0035528 | 0.0038461 | 0.0023249 | 0.0027793 | 0.0034077 |
| 0.0047652 | 0.0058296 | 0.0046457 | 0.0068583 | 0.0057162 | 0.0013902 | 0.0008657 | 0.0034964 | 0.0040613 | 0.0047565 | 0.0030975 | 0.0029671 | 0.0038109 |
| 0.0048123 | 0.0058909 | 0.0046817 | 0.0069675 | 0.0057745 | 0.0014078 | 0.0008582 | 0.0035159 | 0.0040899 | 0.0047946 | 0.0031096 | 0.0029749 | 0.0038539 |
| 0.0055003 | 0.0053348 | 0.0038529 | 0.0052691 | 0.0050902 | 0.0006926 | 0.0009104 | 0.0041989 | 0.0046882 | 0.0040396 | 0.0034054 | 0.0031877 | 0.0030678 |
| 0.0062928 | 0.0053748 | 0.0039265 | 0.007371  | 0.0058048 | 0.0008759 | 0.000773  | 0.0041549 | 0.005178  | 0.0043892 | 0.0036154 | 0.0034765 | 0.0031725 |
| 0.0052207 | 0.0054069 | 0.0043183 | 0.0062693 | 0.0042137 | 0.0008631 | 0.0006992 | 0.0039302 | 0.0049749 | 0.0059647 | 0.0038652 | 0.003942  | 0.0030241 |
| 0.0055094 | 0.0043979 | 0.0036704 | 0.0084081 | 0.005536  | 0.0013246 | 0.0005313 | 0.0043806 | 0.0050879 | 0.005343  | 0.0034025 | 0.002243  | 0.003619  |
| 0.004955  | 0.0065333 | 0.0041744 | 0.0094499 | 0.0052386 | 0.0013464 | 0.0009959 | 0.0035403 | 0.0036521 | 0.0044781 | 0.0021519 | 0.001928  | 0.0042593 |
| 0.0049199 | 0.0057943 | 0.0042606 | 0.0094243 | 0.005675  | 0.0013295 | 0.0009436 | 0.0034621 | 0.0033642 | 0.0038384 | 0.0020626 | 0.0017524 | 0.0044786 |
| 0.005206  | 0.0064669 | 0.0042323 | 0.0098665 | 0.0058746 | 0.0013564 | 0.0010138 | 0.0034619 | 0.0034832 | 0.0039992 | 0.0019206 | 0.0020113 | 0.0047227 |
| 0.0052322 | 0.0063074 | 0.0042318 | 0.0100399 | 0.0058427 | 0.0013323 | 0.0010089 | 0.0035059 | 0.0035226 | 0.0040314 | 0.0019207 | 0.0020055 | 0.0047338 |
| 0.0036231 | 0.0060678 | 0.0050037 | 0.0072587 | 0.0073632 | 0.0024446 | 0.0012339 | 0.0047541 | 0.0053452 | 0.0047585 | 0.0054976 | 0.0049414 | 0.002642  |
| 0.003743  | 0.0051187 | 0.0032271 | 0.0047148 | 0.0059706 | 0.0034512 | 0.0013736 | 0.0060233 | 0.0040977 | 0.0040441 | 0.0069637 | 0.0063603 | 0.0019426 |
| 0.0037455 | 0.0051213 | 0.0032306 | 0.00471   | 0.005972  | 0.0034531 | 0.0013568 | 0.0060193 | 0.0041003 | 0.0040407 | 0.0069647 | 0.0063611 | 0.0019456 |
| 0.004619  | 0.004341  | 0.0036541 | 0.0078678 | 0.0068868 | 0.002461  | 0.001526  | 0.0037179 | 0.0052614 | 0.0054371 | 0.0060226 | 0.0031674 | 0.0031953 |
| 0.0054229 | 0.0053888 | 0.0044262 | 0.0075781 | 0.0066577 | 0.0029273 | 0.0012871 | 0.0040838 | 0.0051429 | 0.0048397 | 0.0047628 | 0.0040036 | 0.003993  |
| 0.0056875 | 0.0058462 | 0.0044334 | 0.0081517 | 0.0068064 | 0.0028791 | 0.0009963 | 0.0039477 | 0.0053483 | 0.0045957 | 0.004909  | 0.0038633 | 0.003957  |
| 0.0055871 | 0.0038767 | 0.0035207 | 0.002751  | 0.0055838 | 0.0048124 | 0.002492  | 0.0050694 | 0.004059  | 0.0054217 | 0.0059726 | 0.0053212 | 0.0023515 |
| 0.0056293 | 0.0030333 | 0.0041943 | 0.0034089 | 0.0049707 | 0.0004793 | 0.0005712 | 0.0033753 | 0.006529  | 0.0060214 | 0.0047957 | 0.0026926 | 0.0031012 |
| 0.0051716 | 0.0030737 | 0.0039257 | 0.003754  | 0.0050111 | 0.0006118 | 0.0003285 | 0.0033457 | 0.0067473 | 0.0052869 | 0.004407  | 0.0027726 | 0.003084  |
| 0.0061255 | 0.0040512 | 0.0054452 | 0.0054291 | 0.0036941 | 0.0018852 | 0.0012426 | 0.003963  | 0.0063655 | 0.0088871 | 0.0055742 | 0.0042936 | 0.0027798 |
| 0.0059476 | 0.0040769 | 0.00543   | 0.0054374 | 0.0037796 | 0.0020722 | 0.0013449 | 0.0039919 | 0.0061892 | 0.0082703 | 0.0053859 | 0.0040599 | 0.0028787 |

|           |           |           |           |           |           |           |           |           |           |           |           |           |
|-----------|-----------|-----------|-----------|-----------|-----------|-----------|-----------|-----------|-----------|-----------|-----------|-----------|
| 0.0066085 | 0.0037751 | 0.0040197 | 0.0045779 | 0.0052502 | 0.0020422 | 0.0009667 | 0.0054177 | 0.0069107 | 0.0032736 | 0.0051752 | 0.0033693 | 0.0029106 |
| 0.006841  | 0.0041812 | 0.0047155 | 0.0043414 | 0.0044972 | 0.0021577 | 0.0010459 | 0.0048222 | 0.0069651 | 0.0043743 | 0.0056647 | 0.0038029 | 0.0026589 |
| 0.0061265 | 0.0017521 | 0.0009122 | 0.004243  | 0.0041716 | 0.0044031 | 0.0030372 | 0.0044148 | 0.004535  | 0.0045178 | 0.0046109 | 0.0052703 | 0.0052736 |
| 0.0074753 | 0.003327  | 0.0010409 | 0.0043688 | 0.003829  | 0.0004176 | 0.0027533 | 0.0046742 | 0.0035457 | 0.0038405 | 0.0038867 | 0.0043643 | 0.0048422 |
| 0.0055597 | 0.0004681 | 0.0036149 | 0.0040675 | 0.0040022 | 0.0007719 | 0.0027183 | 0.0043266 | 0.0039814 | 0.0040102 | 0.0039329 | 0.0035066 | 0.0046544 |
| 0.0047468 | 0.0025008 | 0.0018242 | 0.006628  | 0.0060804 | 0.0043387 | 0.000432  | 0.0031932 | 0.0017766 | 0.001654  | 0.0024532 | 0.0012553 | 0.0039062 |
| 0.0039159 | 0.0023411 | 0.0015048 | 0.0054596 | 0.0065199 | 0.0047173 | 0.0004747 | 0.0020812 | 0.0029888 | 0.0019132 | 0.004478  | 0.0015351 | 0.0021527 |
| 0.005139  | 0.0023779 | 0.0040127 | 0.00629   | 0.0030341 | 0.0045693 | 0.0005932 | 0.0023026 | 0.0022891 | 0.0053922 | 0.0030464 | 0.0019934 | 0.0027852 |
| 0.0042831 | 0.0026958 | 0.0023847 | 0.0034054 | 0.0033231 | 0.0030509 | 0.0002843 | 0.0022345 | 0.0042008 | 0.004953  | 0.0050324 | 0.0023603 | 0.0034312 |
| 0.0045673 | 0.00279   | 0.0019008 | 0.0039557 | 0.0047732 | 0.0045351 | 0.0002691 | 0.0024444 | 0.0040032 | 0.0036451 | 0.003527  | 0.0020487 | 0.0031656 |
| 0.006886  | 0.0047478 | 0.0025234 | 0.0028305 | 0.0054719 | 0.0021211 | 0.0018949 | 0.0031884 | 0.0063659 | 0.0051206 | 0.0023828 | 0.0020751 | 0.0026738 |
| 0.0072702 | 0.006215  | 0.0039961 | 0.0054402 | 0.0052084 | 0.0027207 | 0.0028549 | 0.0045254 | 0.0031185 | 0.0028464 | 0.0026249 | 0.0030677 | 0.0051808 |
| 0.0066907 | 0.0047177 | 0.0032649 | 0.0063531 | 0.0045757 | 0.0035591 | 0.0013786 | 0.0046606 | 0.0035423 | 0.0027521 | 0.0026143 | 0.0019322 | 0.004901  |
| 0.0074289 | 0.0056018 | 0.004058  | 0.0047405 | 0.0046274 | 0.0026822 | 0.0017276 | 0.0044059 | 0.0033118 | 0.0028976 | 0.0025948 | 0.0028738 | 0.00501   |
| 0.0068043 | 0.0041636 | 0.0041052 | 0.0051852 | 0.0056237 | 0.0035935 | 0.0003732 | 0.005494  | 0.0033736 | 0.003061  | 0.0031983 | 0.0027611 | 0.0054503 |
| 0.0062719 | 0.004715  | 0.0050444 | 0.0025188 | 0.0042712 | 0.003377  | 0.0026509 | 0.0056596 | 0.0063654 | 0.0063692 | 0.0052504 | 0.0043398 | 0.0065853 |
| 0.0054389 | 0.004428  | 0.0043258 | 0.0020789 | 0.0046771 | 0.0036295 | 0.0036719 | 0.0054431 | 0.0062475 | 0.0065746 | 0.0057139 | 0.0039068 | 0.0061803 |
| 0.0060182 | 0.0045476 | 0.0044112 | 0.0035968 | 0.0041381 | 0.0029273 | 0.0021463 | 0.005143  | 0.0057418 | 0.005851  | 0.0044086 | 0.0031154 | 0.0059105 |
| 0.005365  | 0.0046715 | 0.0040658 | 0.0037804 | 0.0039301 | 0.002751  | 0.0023096 | 0.0045267 | 0.0053266 | 0.0050911 | 0.0038926 | 0.0029241 | 0.0049509 |
| 0.0060349 | 0.005724  | 0.0054289 | 0.0045581 | 0.0052853 | 0.0031796 | 0.0015398 | 0.0051274 | 0.0047149 | 0.005207  | 0.0039954 | 0.0045293 | 0.0059778 |
| 0.0068007 | 0.0060299 | 0.0053595 | 0.0047423 | 0.0057228 | 0.0036855 | 0.0015589 | 0.0054703 | 0.0048478 | 0.0046026 | 0.004194  | 0.0045412 | 0.006319  |
| 0.0068359 | 0.0057578 | 0.0051476 | 0.0046834 | 0.0056535 | 0.0036824 | 0.0016915 | 0.0057155 | 0.0049316 | 0.0047067 | 0.0041472 | 0.0040845 | 0.0063357 |
| 0.0063603 | 0.0051226 | 0.0050669 | 0.0046106 | 0.004003  | 0.0030725 | 0.0017248 | 0.0049878 | 0.0041747 | 0.003813  | 0.0031606 | 0.0026293 | 0.0046161 |
| 0.0064305 | 0.0048527 | 0.0050376 | 0.0030336 | 0.0048827 | 0.0033363 | 0.0022309 | 0.0057354 | 0.0060023 | 0.0060328 | 0.0050688 | 0.004076  | 0.0067796 |
| 0.0067539 | 0.005289  | 0.0050642 | 0.0038654 | 0.0052856 | 0.0032808 | 0.0016393 | 0.0057337 | 0.0051779 | 0.0050095 | 0.0043599 | 0.0038773 | 0.0063132 |
| 0.0191729 | 0.0094384 | 0.0025082 | 0.0163987 | 0.0034517 | 0.0016846 | 0.0014251 | 0.0033502 | 0.0033695 | 0.0028704 | 0.0036802 | 0.0021927 | 0.0124076 |
| 0.0100141 | 0.0052687 | 0.0047709 | 0.0088259 | 0.0057204 | 0.0022492 | 0.001249  | 0.0042128 | 0.0053622 | 0.0032684 | 0.0041513 | 0.0033754 | 0.0068154 |
| 0.0112445 | 0.0060644 | 0.0048407 | 0.0114114 | 0.0042946 | 0.0016911 | 0.0015178 | 0.0017585 | 0.0042169 | 0.0041954 | 0.0032035 | 0.0036845 | 0.0065337 |
| 0.0056585 | 0.0020005 | 0.0040428 | 0.0039802 | 0.0027247 | 0.0032254 | 0.0007453 | 0.0056196 | 0.0027742 | 0.0029075 | 0.003973  | 0.0035601 | 0.0032228 |
| 0.0065955 | 0.0043726 | 0.003863  | 0.0075485 | 0.0031441 | 0.0017796 | 0.0011606 | 0.0030929 | 0.0040629 | 0.0037708 | 0.00457   | 0.0026091 | 0.0056967 |
| 0.0067254 | 0.0038405 | 0.0028803 | 0.0054659 | 0.0037117 | 0.0019105 | 0.0013885 | 0.0040096 | 0.0032571 | 0.0032877 | 0.0022706 | 0.0019687 | 0.0039361 |
| 0.0086082 | 0.0036945 | 0.003166  | 0.0035761 | 0.0046267 | 0.0020833 | 0.0006047 | 0.0034326 | 0.0045472 | 0.0040622 | 0.0037056 | 0.0028545 | 0.0039486 |
| 0.0063175 | 0.004727  | 0.004307  | 0.0042982 | 0.0047971 | 0.0026348 | 0.0015233 | 0.0054707 | 0.0055723 | 0.005372  | 0.0043011 | 0.003018  | 0.0060155 |
| 0.0056824 | 0.0038646 | 0.0032001 | 0.0043746 | 0.0038061 | 0.0018313 | 0.0017089 | 0.0042601 | 0.004809  | 0.0045296 | 0.0035439 | 0.0021113 | 0.0048525 |
| 0.0059886 | 0.0040913 | 0.0031957 | 0.0048508 | 0.0046482 | 0.002056  | 0.0010159 | 0.0047905 | 0.0050522 | 0.0045957 | 0.0037916 | 0.0022337 | 0.0051165 |
| 0.0064808 | 0.004423  | 0.0030401 | 0.0060023 | 0.0040378 | 0.0024321 | 0.0009154 | 0.0043021 | 0.0045746 | 0.0043838 | 0.0030956 | 0.0023382 | 0.0052802 |
| 0.0065425 | 0.0036056 | 0.0029608 | 0.0054378 | 0.0042435 | 0.0021067 | 0.0008135 | 0.0039614 | 0.005393  | 0.005066  | 0.0044346 | 0.0024915 | 0.0045781 |
| 0.0063831 | 0.0038161 | 0.002987  | 0.0037076 | 0.004022  | 0.0019532 | 0.0010665 | 0.003673  | 0.0054894 | 0.005792  | 0.0041773 | 0.00224   | 0.0049803 |
| 0.0063174 | 0.0047234 | 0.0039297 | 0.0050111 | 0.0049207 | 0.0023316 | 0.0011107 | 0.0048575 | 0.00513   | 0.0053792 | 0.0041264 | 0.0030592 | 0.0059797 |
| 0.00599   | 0.0045166 | 0.0032888 | 0.0042812 | 0.0046828 | 0.0021796 | 0.0007587 | 0.0044677 | 0.0048893 | 0.005493  | 0.0038323 | 0.0029905 | 0.005936  |
| 0.0059491 | 0.0044954 | 0.0050787 | 0.0049877 | 0.0057372 | 0.0035977 | 0.0015671 | 0.0052941 | 0.005091  | 0.004733  | 0.0044977 | 0.0044316 | 0.004645  |
| 0.0060641 | 0.0045516 | 0.0048138 | 0.005773  | 0.0047943 | 0.0033915 | 0.001604  | 0.0051577 | 0.0047297 | 0.0040423 | 0.0032548 | 0.0033809 | 0.0048786 |
| 0.0061976 | 0.0046921 | 0.0041146 | 0.0047768 | 0.0047234 | 0.002607  | 0.0010773 | 0.0052002 | 0.0056858 | 0.00531   | 0.0042124 | 0.0029353 | 0.0056212 |
| 0.0065141 | 0.0052115 | 0.0046822 | 0.0052461 | 0.0051902 | 0.0031736 | 0.0014245 | 0.0055396 | 0.0052186 | 0.0049867 | 0.0042129 | 0.0038779 | 0.0062329 |
| 0.0065233 | 0.0052681 | 0.0045664 | 0.0052388 | 0.0052608 | 0.0030844 | 0.0012975 | 0.0056612 | 0.0052863 | 0.0049344 | 0.0042975 | 0.0035407 | 0.0060823 |
| 0.0066541 | 0.0053122 | 0.004257  | 0.0061512 | 0.0049319 | 0.0029895 | 0.0013266 | 0.0050875 | 0.004497  | 0.0043829 | 0.0035008 | 0.0034334 | 0.0063187 |
| 0.0056423 | 0.0049123 | 0.0035593 | 0.0046347 | 0.0048276 | 0.0026388 | 0.001361  | 0.0046519 | 0.0038935 | 0.0051269 | 0.0032952 | 0.0031071 | 0.0054076 |
| 0.0051276 | 0.010554  | 0.0079712 | 0.0105626 | 0.002249  | 0.0017595 | 0.0013063 | 0.0019982 | 0.0066595 | 0.0057789 | 0.0079727 | 0.0070452 | 0.0038111 |
| 0.0061353 | 0.0034523 | 0.0049885 | 0.0025385 | 0.0031777 | 0.002965  | 0.0013799 | 0.0050793 | 0.0041031 | 0.0030899 | 0.0032562 | 0.0023584 | 0.0040472 |
| 0.0057165 | 0.0041541 | 0.0045938 | 0.005768  | 0.0032325 | 0.0025084 | 0.0010026 | 0.0046796 | 0.0037867 | 0.0039036 | 0.003056  | 0.0018692 | 0.0046155 |
| 0.0059825 | 0.0043683 | 0.0058421 | 0.0034472 | 0.0036128 | 0.0029886 | 0.0012984 | 0.0054584 | 0.0040577 | 0.0034845 | 0.0031971 | 0.0022915 | 0.0048066 |
| 0.005829  | 0.0041525 | 0.0032995 | 0.0043375 | 0.0035472 | 0.0025937 | 0.0042156 | 0.0038727 | 0.0045917 | 0.0034729 | 0.0034552 | 0.003349  | 0.0042564 |
| 0.0057556 | 0.0045294 | 0.0033567 | 0.0052768 | 0.0035859 | 0.001788  | 0.0013407 | 0.0032334 | 0.0042758 | 0.0029346 | 0.0032424 | 0.0015983 | 0.0037871 |
| 0.005721  | 0.003694  | 0.0025666 | 0.0048803 | 0.0038838 | 0.0017038 | 0.0012156 | 0.0038713 | 0.003733  | 0.0029398 | 0.0031403 | 0.0016655 | 0.0056573 |
| 0.0017537 | 0.0017301 | 0.0030122 | 0.0028813 | 0.0067555 | 0.0100228 | 0.0021273 | 0.0067735 | 0.006137  | 0.0131144 | 0.002414  | 0.0019009 | 0.0053661 |
| 0.0013537 | 0.0014669 | 0.0018671 | 0.0021986 | 0.005064  | 0.0150832 | 0.0044612 | 0.0068377 | 0.0089664 | 0.0234979 | 0.0040214 | 0.0046178 | 0.0039909 |
| 0.0025815 | 0.0031939 | 0.00509   | 0.0040525 | 0.0016805 | 0.0125835 | 0.0037036 | 0.0036285 | 0.0036291 | 0.0218273 | 0.0021142 | 0.0055721 | 0.0044175 |
| 0.0019176 | 0.0029305 | 0.0059701 | 0.0011083 | 0.0020509 | 0.0110689 | 0.0036726 | 0.00387   | 0.0056491 | 0.0247353 | 0.004212  | 0.0058652 | 0.0028274 |

|           |           |           |           |           |           |           |           |           |           |           |           |           |
|-----------|-----------|-----------|-----------|-----------|-----------|-----------|-----------|-----------|-----------|-----------|-----------|-----------|
| 0.0030729 | 0.003439  | 0.0038619 | 0.0049626 | 0.0023095 | 0.004799  | 0.002834  | 0.0067196 | 0.0031445 | 0.0044397 | 0.0036953 | 0.0061898 | 0.0056589 |
| 0.0042914 | 0.0021859 | 0.0029212 | 0.0057498 | 0.007463  | 0.008374  | 0.0012189 | 0.0057698 | 0.006228  | 0.0047398 | 0.0023182 | 0.0093321 | 0.0031982 |
| 0.004832  | 0.0027067 | 0.0107858 | 0.0049943 | 0.0058754 | 0.0173113 | 0.0017457 | 0.0069501 | 0.0052098 | 0.0057079 | 0.0015486 | 0.0092212 | 0.0033827 |
| 0.0049534 | 0.0038901 | 0.0061946 | 0.0042568 | 0.0047001 | 0.0151204 | 0.0027557 | 0.0083857 | 0.0049738 | 0.0049365 | 0.0023439 | 0.006117  | 0.0019162 |
| 0.0050848 | 0.0066586 | 0.0055789 | 0.0088399 | 0.004279  | 0.0049785 | 0.0055226 | 0.005752  | 0.0069319 | 0.0033056 | 0.0045248 | 0.005857  | 0.0034254 |
| 0.0039087 | 0.003431  | 0.0032774 | 0.0038296 | 0.0013322 | 0.0045361 | 0.009717  | 0.0041135 | 0.0037629 | 0.004475  | 0.0033507 | 0.0036509 | 0.0041546 |
| 0.004076  | 0.0057716 | 0.0057177 | 0.0032913 | 0.0051287 | 0.0072417 | 0.0048502 | 0.0053932 | 0.0064386 | 0.0071101 | 0.0066743 | 0.0097367 | 0.0044594 |
| 0.0040847 | 0.0032499 | 0.0031353 | 0.0027291 | 0.0063396 | 0.0088358 | 0.0082506 | 0.0077144 | 0.0056408 | 0.0072204 | 0.0063873 | 0.0076059 | 0.0057115 |
| 0.0028729 | 0.0037444 | 0.0047721 | 0.0033034 | 0.0063129 | 0.0076992 | 0.0087653 | 0.0058019 | 0.0054811 | 0.0043628 | 0.0088201 | 0.0062735 | 0.0059827 |
| 0.0036047 | 0.0055282 | 0.0060707 | 0.0029553 | 0.0054703 | 0.0072646 | 0.0082968 | 0.006776  | 0.0065129 | 0.0050871 | 0.0088769 | 0.0063172 | 0.0058348 |
| 0.0040021 | 0.0035908 | 0.0029413 | 0.0027635 | 0.0058994 | 0.0066775 | 0.0026758 | 0.0063388 | 0.0107236 | 0.0046675 | 0.0116379 | 0.0065255 | 0.0042599 |
| 0.0045172 | 0.0045094 | 0.0039189 | 0.0037177 | 0.0058478 | 0.006402  | 0.00274   | 0.0071102 | 0.0119027 | 0.0053907 | 0.0114081 | 0.004368  | 0.0043572 |
| 0.003842  | 0.0048575 | 0.0051142 | 0.0043195 | 0.0059228 | 0.0072645 | 0.0027421 | 0.0046226 | 0.011349  | 0.0085206 | 0.0100075 | 0.0059627 | 0.0075322 |
| 0.0057262 | 0.0038721 | 0.004898  | 0.0047192 | 0.0066797 | 0.006242  | 0.0049556 | 0.0038497 | 0.0133162 | 0.0044477 | 0.0148159 | 0.0041996 | 0.0062033 |
| 0.0036684 | 0.0046792 | 0.0036419 | 0.0041878 | 0.0078515 | 0.0094879 | 0.0034923 | 0.004122  | 0.0102275 | 0.0051724 | 0.0178446 | 0.0050867 | 0.0072439 |
| 0.0028923 | 0.0035056 | 0.0030172 | 0.0061241 | 0.0080561 | 0.004004  | 0.0049229 | 0.0072774 | 0.0117223 | 0.004279  | 0.0110084 | 0.0042294 | 0.0056376 |
| 0.0031396 | 0.0048326 | 0.004448  | 0.0029703 | 0.006298  | 0.006569  | 0.0019298 | 0.0056324 | 0.0101201 | 0.0050561 | 0.0085181 | 0.0064725 | 0.0049931 |
| 0.0033192 | 0.0034877 | 0.004206  | 0.0035748 | 0.0044987 | 0.0041658 | 0.0014235 | 0.0056666 | 0.0115888 | 0.0076188 | 0.0078472 | 0.0068901 | 0.0041437 |
| 0.0038283 | 0.0053455 | 0.0035255 | 0.003572  | 0.0060733 | 0.0051644 | 0.0020241 | 0.0087716 | 0.0138811 | 0.0051344 | 0.0129718 | 0.0051616 | 0.0036525 |
| 0.0032504 | 0.0048486 | 0.0025311 | 0.0034425 | 0.0088307 | 0.0048521 | 0.0079097 | 0.0038503 | 0.0107584 | 0.0034001 | 0.0126588 | 0.0043156 | 0.0054319 |
| 0.006139  | 0.0033912 | 0.0050137 | 0.0007155 | 0.0038848 | 0.009605  | 0.0079754 | 0.0039259 | 0.0084223 | 0.0045276 | 0.0027192 | 0.0117474 | 0.0070222 |
| 0.0038862 | 0.0021132 | 0.0046047 | 0.0030894 | 0.0049896 | 0.0035145 | 0.0068186 | 0.0041754 | 0.0048629 | 0.0063996 | 0.0081704 | 0.0100895 | 0.0040203 |
| 0.0026441 | 0.0028706 | 0.001332  | 0.0022447 | 0.0062572 | 0.006342  | 0.004479  | 0.0048904 | 0.0078545 | 0.0020923 | 0.005703  | 0.0040815 | 0.0028449 |
| 0.0028593 | 0.0028028 | 0.0013101 | 0.002198  | 0.0061575 | 0.0061411 | 0.0044435 | 0.0048565 | 0.0079277 | 0.0020257 | 0.0057502 | 0.0043267 | 0.0027479 |
| 0.0035551 | 0.0084673 | 0.0055074 | 0.002144  | 0.0039712 | 0.0041372 | 0.0111395 | 0.0032476 | 0.0124741 | 0.0030369 | 0.0037479 | 0.006425  | 0.006554  |
| 0.0029598 | 0.0036768 | 0.0020813 | 0.0037951 | 0.005813  | 0.0045403 | 0.0136642 | 0.0038725 | 0.0102684 | 0.0008571 | 0.0038295 | 0.005609  | 0.0077353 |
| 0.0023826 | 0.0021435 | 0.0033771 | 0.0021955 | 0.0034706 | 0.0096111 | 0.0269497 | 0.0019169 | 0.0088334 | 0.0021678 | 0.0039849 | 0.0032425 | 0.0137383 |
| 0.0022927 | 0.0021562 | 0.00455   | 0.0022834 | 0.0030222 | 0.0097172 | 0.0290721 | 0.0024168 | 0.0090515 | 0.0024381 | 0.0041347 | 0.0043955 | 0.0125163 |
| 0.0019968 | 0.0045735 | 0.0030378 | 0.001739  | 0.0057571 | 0.0046959 | 0.0018647 | 0.0021334 | 0.0047679 | 0.0024014 | 0.0041873 | 0.0035639 | 0.0046392 |
| 0.0048076 | 0.0035332 | 0.0022078 | 0.0032854 | 0.0048865 | 0.0071894 | 0.0018351 | 0.0080404 | 0.0036608 | 0.0024541 | 0.0027332 | 0.0035522 | 0.0051018 |
| 0.0048026 | 0.0041347 | 0.0021064 | 0.0035761 | 0.0049404 | 0.0064997 | 0.0019945 | 0.0089135 | 0.0034287 | 0.0026453 | 0.0031201 | 0.0031619 | 0.0054985 |
| 0.0030499 | 0.0012748 | 0.0019582 | 0.0021842 | 0.0042319 | 0.007468  | 0.0051819 | 0.0056697 | 0.0057154 | 0.0051178 | 0.0080704 | 0.0073943 | 0.0065362 |
| 0.0034601 | 0.0025656 | 0.0020245 | 0.002475  | 0.0055887 | 0.0111695 | 0.0032821 | 0.004631  | 0.0062123 | 0.0036914 | 0.0072542 | 0.0049479 | 0.0046101 |
| 0.0032835 | 0.0020917 | 0.0018521 | 0.0020635 | 0.0054957 | 0.0114234 | 0.0036192 | 0.0041335 | 0.0082276 | 0.0039038 | 0.008118  | 0.004796  | 0.0045264 |
| 0.0028133 | 0.0019469 | 0.0022285 | 0.0032998 | 0.0072943 | 0.0055898 | 0.0023898 | 0.0057882 | 0.0114175 | 0.0036845 | 0.0152406 | 0.0042058 | 0.0032619 |
| 0.0034993 | 0.002654  | 0.0017949 | 0.0070098 | 0.0048843 | 0.010104  | 0.0017814 | 0.0034277 | 0.0058697 | 0.0059575 | 0.0091358 | 0.0045998 | 0.0065784 |

| SPR_22    | SPR_24    | SPR_25    | SPR_26    | SPR_28    | SPR_29    | SPR_32    | SPR_36    | SPR_39    | SPR_40    |
|-----------|-----------|-----------|-----------|-----------|-----------|-----------|-----------|-----------|-----------|
| 0.0024756 | 0.0011158 | 0.0062839 | 0.0004304 | 0.0019809 | 0.0007622 | 0.0038668 | 0.0019702 | 0.0012697 | 0.0014452 |
| 0.0032553 | 0.0029639 | 0.0009013 | 0.0026139 | 0.0043685 | 0.0009976 | 0.0027929 | 0.0012697 | 0.0024501 | 0.0007257 |
| 0.0013423 | 0.0019657 | 0.0046528 | 0.0015499 | 0.0073824 | 0.0007097 | 0.000889  | 0.0017205 | 0.0005606 | 0.0010186 |
| 0.001357  | 0.0019238 | 0.004545  | 0.0015602 | 0.0074309 | 0.0007276 | 0.0009012 | 0.0016592 | 0.0005633 | 0.0009699 |
| 0.0026501 | 0.0007652 | 0.0007182 | 0.0012043 | 0.0018922 | 0.0010279 | 0.003082  | 0.0068244 | 0.0017862 | 0.0032369 |
| 0.002683  | 0.000801  | 0.0006203 | 0.0012446 | 0.0017383 | 0.0011459 | 0.0030694 | 0.007636  | 0.001813  | 0.0032516 |
| 0.0030679 | 0.0008516 | 0.0008543 | 0.0016614 | 0.0018053 | 0.0013166 | 0.0038344 | 0.0071827 | 0.0017146 | 0.0027716 |
| 0.003071  | 0.0008535 | 0.0007431 | 0.0016567 | 0.0014935 | 0.0015214 | 0.0040646 | 0.007822  | 0.0016965 | 0.0035487 |
| 0.0024421 | 0.0018235 | 0.0020855 | 0.0007653 | 0.0010189 | 0.0008451 | 0.0009778 | 0.0031098 | 0.0016673 | 0.0048397 |
| 0.0065687 | 0.0024837 | 0.0026368 | 0.0011325 | 0.0008501 | 0.0008278 | 0.0012669 | 0.0056067 | 0.0028141 | 0.0078499 |
| 0.0045664 | 0.0012065 | 0.0011234 | 0.0005042 | 0.0023401 | 0.0017585 | 0.0007228 | 0.0052689 | 0.0021767 | 0.0050577 |
| 0.0016158 | 0.0026653 | 0.0013641 | 0.0007524 | 0.0025332 | 0.0011598 | 0.0012227 | 0.0052331 | 0.0023226 | 0.0035297 |
| 0.0016663 | 0.0015986 | 0.0033017 | 0.0009532 | 0.0025131 | 0.0010028 | 0.0015189 | 0.0035328 | 0.0024358 | 0.003257  |
| 0.001127  | 0.0011978 | 0.0025074 | 0.0006631 | 0.0013904 | 0.0011061 | 0.0014426 | 0.0056077 | 0.0014647 | 0.0050288 |
| 0.0027879 | 0.0012712 | 0.0024922 | 0.0003674 | 0.0019868 | 0.0011867 | 0.0014986 | 0.0027813 | 0.0025591 | 0.0031056 |
| 0.003304  | 0.002219  | 0.0030216 | 0.000828  | 0.0016453 | 0.0019033 | 0.001788  | 0.0038392 | 0.0013647 | 0.0022208 |
| 0.0014659 | 0.0009972 | 0.001765  | 0.0005465 | 0.0023706 | 0.0019387 | 0.0006899 | 0.0056326 | 0.0015203 | 0.005163  |
| 0.0027645 | 0.0008959 | 0.0032501 | 0.0004039 | 0.0030058 | 0.0017325 | 0.0011954 | 0.0088347 | 0.001294  | 0.0047952 |
| 0.0028181 | 0.0007907 | 0.0017602 | 0.0002811 | 0.0036819 | 0.0019189 | 0.0022303 | 0.0075609 | 0.0010256 | 0.0037582 |
| 0.0021466 | 0.0017289 | 0.0028784 | 0.0015816 | 0.0050611 | 0.00154   | 0.0017739 | 0.0024081 | 0.0023586 | 0.0046756 |
| 0.0034387 | 0.0012943 | 0.002213  | 0.0006623 | 0.0022127 | 0.001973  | 0.0026608 | 0.0056135 | 0.0010297 | 0.0049778 |
| 0.0036838 | 0.0011368 | 0.0024719 | 0.0008115 | 0.002489  | 0.0019721 | 0.0028856 | 0.0045187 | 0.0008007 | 0.0028011 |
| 0.0048247 | 0.0011966 | 0.0026605 | 0.0007688 | 0.0023256 | 0.0018269 | 0.0027294 | 0.0048296 | 0.0008587 | 0.0028788 |
| 0.0029256 | 0.0006783 | 0.0013844 | 0.0002704 | 0.0054497 | 0.002116  | 0.0014312 | 0.0057311 | 0.0012999 | 0.0052497 |
| 0.0031671 | 0.0010432 | 0.0016887 | 0.0005598 | 0.0047958 | 0.0018144 | 0.0015967 | 0.0035673 | 0.0008607 | 0.0045663 |
| 0.0016128 | 0.0023372 | 0.0008344 | 0.0021268 | 0.0042755 | 0.001427  | 0.0023742 | 0.0059532 | 0.0015786 | 0.0070088 |
| 0.0028488 | 0.0018783 | 0.0029322 | 0.0011822 | 0.0016694 | 0.0009073 | 0.0012339 | 0.0035469 | 0.0020128 | 0.00381   |
| 0.0027342 | 0.0011333 | 0.002947  | 0.0012861 | 0.0032347 | 0.0023755 | 0.00208   | 0.0060366 | 0.0030676 | 0.0050199 |
| 0.0021617 | 0.001404  | 0.0014724 | 0.001164  | 0.002523  | 0.0011524 | 0.0010233 | 0.0033648 | 0.0026372 | 0.0036215 |
| 0.0019962 | 0.0014938 | 0.0013863 | 0.0011661 | 0.003781  | 0.0016761 | 0.0011305 | 0.0037223 | 0.0025643 | 0.0036746 |
| 0.0019847 | 0.0013106 | 0.001986  | 0.0011119 | 0.0033963 | 0.0015744 | 0.0010276 | 0.0035981 | 0.0024578 | 0.0038567 |
| 0.0023964 | 0.00128   | 0.003122  | 0.0012354 | 0.0044758 | 0.001661  | 0.0016355 | 0.0037554 | 0.0038628 | 0.005497  |
| 0.0035032 | 0.0008209 | 0.0022332 | 0.0009121 | 0.0030778 | 0.0009936 | 0.0014968 | 0.0042076 | 0.0035235 | 0.0056055 |
| 0.0036042 | 0.0011366 | 0.0023253 | 0.0017064 | 0.0026552 | 0.0012914 | 0.0014552 | 0.0022322 | 0.003747  | 0.0047213 |
| 0.0023414 | 0.0006808 | 0.0017965 | 0.0018735 | 0.0040886 | 0.0013325 | 0.0021352 | 0.0042322 | 0.0035733 | 0.0043571 |
| 0.0020064 | 0.002151  | 0.0031202 | 0.0023678 | 0.0045493 | 0.0009567 | 0.0018754 | 0.0002044 | 0.0032585 | 0.0046919 |
| 0.0017045 | 0.0010374 | 0.0008651 | 0.0009613 | 0.0057404 | 0.0012848 | 0.000935  | 0.0036972 | 0.0032603 | 0.0033937 |
| 0.001757  | 0.0013423 | 0.0007669 | 0.0011387 | 0.0050528 | 0.0011984 | 0.0010042 | 0.0039943 | 0.0031548 | 0.0031409 |
| 0.0022252 | 0.0006592 | 0.0015362 | 0.001233  | 0.0094762 | 0.0010619 | 0.0013213 | 0.0030344 | 0.0022757 | 0.0048645 |
| 0.0022522 | 0.0005315 | 0.0015512 | 0.0012411 | 0.0094059 | 0.0010797 | 0.0013394 | 0.0030532 | 0.0022708 | 0.0048219 |
| 0.0039841 | 0.0008925 | 0.0016861 | 0.0005939 | 0.0032482 | 0.0008657 | 0.0022801 | 0.0041394 | 0.0019639 | 0.0035505 |
| 0.0030971 | 0.000662  | 0.0012781 | 0.0003811 | 0.0080828 | 0.0009488 | 0.0015608 | 0.0048288 | 0.0021238 | 0.0045626 |
| 0.003178  | 0.0006593 | 0.0010598 | 0.0003497 | 0.0068593 | 0.0008199 | 0.0016153 | 0.0048871 | 0.0018613 | 0.0049868 |
| 0.0025146 | 0.000954  | 0.0018924 | 0.0004988 | 0.0068112 | 0.0011511 | 0.0016418 | 0.0037736 | 0.0020402 | 0.0053493 |
| 0.0023105 | 0.0011138 | 0.0019219 | 0.0005631 | 0.005179  | 0.0009624 | 0.0018668 | 0.004876  | 0.0021177 | 0.0050059 |
| 0.0034999 | 0.0012892 | 0.0008905 | 0.0006576 | 0.001491  | 0.0012858 | 0.0012362 | 0.0042732 | 0.0023124 | 0.0034774 |
| 0.0037432 | 0.001177  | 0.0011772 | 0.0015267 | 0.0016591 | 0.0013995 | 0.0008114 | 0.0025842 | 0.0019738 | 0.00453   |
| 0.0035897 | 0.0016482 | 0.0015837 | 0.0005994 | 0.0020766 | 0.0012126 | 0.0010305 | 0.0045913 | 0.001024  | 0.0036334 |
| 0.0036236 | 0.0015991 | 0.0016731 | 0.0005234 | 0.0023418 | 0.0012534 | 0.0010676 | 0.0045271 | 0.0009615 | 0.0033205 |
| 0.0026889 | 0.0010582 | 0.0012337 | 0.0018869 | 0.0030832 | 0.0009253 | 0.0048382 | 0.0046155 | 0.0011258 | 0.0025006 |
| 0.0038379 | 0.0010847 | 0.0016001 | 0.0005598 | 0.0041715 | 0.0009291 | 0.0012192 | 0.0042992 | 0.0013946 | 0.0035524 |
| 0.0047187 | 0.0013057 | 0.0018695 | 0.0005616 | 0.0038511 | 0.0010013 | 0.0011602 | 0.0058191 | 0.0012682 | 0.0039191 |
| 0.0028873 | 0.0012138 | 0.0027099 | 0.0015297 | 0.0035107 | 0.0011959 | 0.0015497 | 0.0057153 | 0.0012455 | 0.0039429 |
| 0.0053    | 0.0010883 | 0.0014346 | 0.0011894 | 0.0040924 | 0.0006043 | 0.0013653 | 0.0070075 | 0.0011402 | 0.0041031 |
| 0.0031249 | 0.0008137 | 0.0018512 | 0.001054  | 0.0036449 | 0.0005062 | 0.0013245 | 0.0032304 | 0.0016615 | 0.0058853 |
| 0.0034366 | 0.0006584 | 0.0022586 | 0.0006415 | 0.0021374 | 0.0009965 | 0.0012967 | 0.0046012 | 0.0022158 | 0.0059637 |

|           |           |           |           |           |           |           |           |           |           |
|-----------|-----------|-----------|-----------|-----------|-----------|-----------|-----------|-----------|-----------|
| 0.0037577 | 0.0007599 | 0.0026116 | 0.0008117 | 0.0032681 | 0.0014514 | 0.0013633 | 0.0045391 | 0.0025073 | 0.0057307 |
| 0.0022813 | 0.001569  | 0.0043439 | 0.0007089 | 0.0027474 | 0.0012027 | 0.0010694 | 0.005433  | 0.0023959 | 0.0052001 |
| 0.0017986 | 0.00125   | 0.0043048 | 0.0005513 | 0.0030332 | 0.001227  | 0.0015191 | 0.0060969 | 0.0018655 | 0.0047614 |
| 0.0018429 | 0.0008983 | 0.0021701 | 0.0005065 | 0.0031961 | 0.0016819 | 0.0016178 | 0.0025708 | 0.0012911 | 0.0034966 |
| 0.0017623 | 0.0008928 | 0.001991  | 0.0005013 | 0.0021535 | 0.0013317 | 0.0017214 | 0.0025911 | 0.0014279 | 0.0034887 |
| 0.001516  | 0.0009264 | 0.0014754 | 0.0006602 | 0.0033591 | 0.0010776 | 0.0012131 | 0.0030041 | 0.0012035 | 0.0056567 |
| 0.0022534 | 0.0010169 | 0.001665  | 0.00055   | 0.004786  | 0.001161  | 0.0014578 | 0.0027395 | 0.0015369 | 0.004664  |
| 0.0021198 | 0.0012954 | 0.0019314 | 0.0005969 | 0.0041476 | 0.00122   | 0.0015456 | 0.0026933 | 0.0016724 | 0.0039951 |
| 0.0017416 | 0.0013857 | 0.0031078 | 0.0005032 | 0.0033047 | 0.0014578 | 0.0012294 | 0.0028818 | 0.0013852 | 0.0036718 |
| 0.0018562 | 0.0015324 | 0.0030609 | 0.0005317 | 0.0030368 | 0.0013527 | 0.0014066 | 0.0030874 | 0.0014725 | 0.0034508 |
| 0.0025886 | 0.0010501 | 0.0020263 | 0.0004431 | 0.0026579 | 0.0010319 | 0.0013065 | 0.0029752 | 0.0021636 | 0.004154  |
| 0.0031357 | 0.0011151 | 0.0035463 | 0.0003991 | 0.0027991 | 0.0012635 | 0.0012293 | 0.0046313 | 0.002847  | 0.004417  |
| 0.0042632 | 0.0016682 | 0.0032875 | 0.00057   | 0.002268  | 0.001291  | 0.0011817 | 0.0049085 | 0.0015423 | 0.0039078 |
| 0.001687  | 0.002393  | 0.0037956 | 0.0007945 | 0.003231  | 0.0019732 | 0.0010792 | 0.003366  | 0.0016313 | 0.004121  |
| 0.0020775 | 0.0017283 | 0.0034471 | 0.0005844 | 0.0020864 | 0.0014278 | 0.0012276 | 0.0029477 | 0.0037248 | 0.0038671 |
| 0.0025482 | 0.0012495 | 0.0016595 | 0.0006401 | 0.0028269 | 0.0014614 | 0.0010995 | 0.0031416 | 0.0017392 | 0.0041039 |
| 0.0022909 | 0.0010634 | 0.0014536 | 0.0006827 | 0.0017929 | 0.0012666 | 0.0011649 | 0.0037154 | 0.0020582 | 0.0046513 |
| 0.0027183 | 0.000888  | 0.0013535 | 0.0007125 | 0.0024097 | 0.0011986 | 0.0012561 | 0.0034215 | 0.0022897 | 0.0040971 |
| 0.0028688 | 0.0008904 | 0.0011435 | 0.0006666 | 0.0021716 | 0.0012925 | 0.0013874 | 0.0032827 | 0.002857  | 0.003721  |
| 0.002935  | 0.000736  | 0.0022188 | 0.0004801 | 0.0030441 | 0.0015685 | 0.0014257 | 0.0046512 | 0.0016158 | 0.0034286 |
| 0.0023755 | 0.0009806 | 0.0010736 | 0.0003622 | 0.0048452 | 0.0016524 | 0.0017037 | 0.004331  | 0.0017432 | 0.004153  |
| 0.0022467 | 0.0009771 | 0.0011051 | 0.0003576 | 0.004012  | 0.0014162 | 0.0015032 | 0.004582  | 0.0020084 | 0.0041287 |
| 0.0022292 | 0.0014867 | 0.001775  | 0.0003149 | 0.004282  | 0.0018797 | 0.0015977 | 0.0044298 | 0.0013178 | 0.0042165 |
| 0.002113  | 0.001646  | 0.0014157 | 0.0003331 | 0.0036984 | 0.0019644 | 0.0015314 | 0.004193  | 0.0015615 | 0.0050358 |
| 0.0035626 | 0.001469  | 0.001072  | 0.0002735 | 0.0016968 | 0.0010181 | 0.0023202 | 0.0051819 | 0.0021813 | 0.0039976 |
| 0.0029608 | 0.0010228 | 0.0011082 | 0.0002326 | 0.0019862 | 0.0010911 | 0.0018167 | 0.0077644 | 0.0029096 | 0.0062309 |
| 0.0036267 | 0.0012879 | 0.0013536 | 0.0002366 | 0.0030919 | 0.0011319 | 0.0017641 | 0.0082203 | 0.0027848 | 0.0062019 |
| 0.0041832 | 0.0010284 | 0.0012795 | 0.0002135 | 0.0028329 | 0.0011146 | 0.0016135 | 0.0081297 | 0.0033926 | 0.0054086 |
| 0.0032472 | 0.0006119 | 0.0010858 | 0.0006971 | 0.0024052 | 0.0015782 | 0.0012768 | 0.0030943 | 0.0016172 | 0.0044731 |
| 0.0036726 | 0.0009497 | 0.000948  | 0.0004821 | 0.0037471 | 0.0009838 | 0.0017996 | 0.0047138 | 0.0014547 | 0.0052961 |
| 0.003037  | 0.0010733 | 0.0009727 | 0.0007018 | 0.0039263 | 0.000873  | 0.0014894 | 0.0040356 | 0.0014017 | 0.0053196 |
| 0.0048397 | 0.000875  | 0.0007712 | 0.0005589 | 0.003586  | 0.0008646 | 0.0013818 | 0.0041734 | 0.002065  | 0.004728  |
| 0.0035858 | 0.0007447 | 0.0010644 | 0.0007048 | 0.0033827 | 0.0014021 | 0.0011096 | 0.0035152 | 0.002548  | 0.0039937 |
| 0.0034533 | 0.0007255 | 0.001022  | 0.0008881 | 0.0026632 | 0.0016806 | 0.0013327 | 0.0033742 | 0.002553  | 0.006071  |
| 0.0042078 | 0.0008592 | 0.0012888 | 0.0008168 | 0.0036543 | 0.0018633 | 0.0012341 | 0.0031865 | 0.0027595 | 0.0053001 |
| 0.0041664 | 0.000771  | 0.0012315 | 0.0006507 | 0.0044264 | 0.0017369 | 0.0017006 | 0.0040043 | 0.0016677 | 0.0057731 |
| 0.0042372 | 0.0007103 | 0.0016798 | 0.0006314 | 0.0038856 | 0.0014552 | 0.0017834 | 0.0031755 | 0.0019807 | 0.0064812 |
| 0.0030912 | 0.0011711 | 0.0013904 | 0.0005347 | 0.0022239 | 0.0015457 | 0.0016624 | 0.0062142 | 0.0019595 | 0.0055066 |
| 0.0026826 | 0.0008158 | 0.0021569 | 0.0005128 | 0.0024759 | 0.0013506 | 0.0014185 | 0.0060128 | 0.0018558 | 0.0074053 |
| 0.0023455 | 0.0012991 | 0.0008927 | 0.0010233 | 0.0092021 | 0.0014428 | 0.0014479 | 0.0034479 | 0.002948  | 0.0042155 |
| 0.0036133 | 0.0014223 | 0.0007872 | 0.0029127 | 0.003525  | 0.0018037 | 0.0012016 | 0.0022189 | 0.0068258 | 0.0063264 |
| 0.0019044 | 0.0016994 | 0.0011478 | 0.0020824 | 0.0020443 | 0.0026853 | 0.0008198 | 0.0021312 | 0.0024415 | 0.0029541 |
| 0.0019851 | 0.0022478 | 0.0013918 | 0.0032284 | 0.0013836 | 0.0036745 | 0.0007928 | 0.002096  | 0.002024  | 0.0047142 |
| 0.0024536 | 0.0024504 | 0.0020368 | 0.0028999 | 0.0011657 | 0.0032533 | 0.0014009 | 0.0022479 | 0.002487  | 0.0024675 |
| 0.0067267 | 0.0015755 | 0.0009052 | 0.0030806 | 0.0012426 | 0.0009625 | 0.0012831 | 0.004416  | 0.006492  | 0.0087742 |
| 0.0033448 | 0.0019758 | 0.0014033 | 0.0025508 | 0.0014489 | 0.0022159 | 0.0023106 | 0.0055425 | 0.0035386 | 0.0073402 |
| 0.0018597 | 0.0017534 | 0.0004819 | 0.0035749 | 0.0010915 | 0.0023103 | 0.001107  | 0.0033196 | 0.0050952 | 0.0056754 |
| 0.0016515 | 0.0022006 | 0.0003588 | 0.0018593 | 0.001031  | 0.0023494 | 0.0017469 | 0.0029548 | 0.0066682 | 0.0061505 |
| 0.0013141 | 0.0023452 | 0.0004453 | 0.0019575 | 0.0010047 | 0.0022007 | 0.0015328 | 0.0054165 | 0.0051186 | 0.0052114 |
| 0.002085  | 0.0012498 | 0.0004114 | 0.0011897 | 0.0017971 | 0.0020137 | 0.0011341 | 0.0030829 | 0.0025597 | 0.0034413 |
| 0.0021835 | 0.0012154 | 0.0039142 | 0.0012043 | 0.0015182 | 0.0016464 | 0.0013124 | 0.0039647 | 0.0030081 | 0.004503  |
| 0.0041827 | 0.0051592 | 0.0050829 | 0.005323  | 0.0015453 | 0.0047306 | 0.0038341 | 0.0015755 | 0.0080905 | 0.0024245 |
| 0.0049272 | 0.0044343 | 0.0047927 | 0.0042758 | 0.001894  | 0.0056025 | 0.0051467 | 0.0016931 | 0.0057431 | 0.0023473 |
| 0.0048461 | 0.004185  | 0.0042493 | 0.0029533 | 0.002453  | 0.0050258 | 0.0045552 | 0.001628  | 0.0062673 | 0.0023259 |
| 0.0036276 | 0.0021476 | 0.0023325 | 0.0015063 | 0.0011736 | 0.0098175 | 0.0038505 | 0.0008996 | 0.0073243 | 0.0032237 |
| 0.0046361 | 0.0028535 | 0.0029054 | 0.0038739 | 0.0023918 | 0.0050438 | 0.0035762 | 0.0011961 | 0.0059016 | 0.0023525 |
| 0.0037172 | 0.0024377 | 0.0023956 | 0.0035896 | 0.0016385 | 0.0039592 | 0.003042  | 0.0013118 | 0.008447  | 0.0023339 |
| 0.0025961 | 0.0024233 | 0.0016134 | 0.0027445 | 0.0020917 | 0.0049081 | 0.0025887 | 0.0017925 | 0.0068769 | 0.0028542 |

|           |           |           |           |           |           |           |           |           |           |
|-----------|-----------|-----------|-----------|-----------|-----------|-----------|-----------|-----------|-----------|
| 0.0029016 | 0.0026834 | 0.002498  | 0.0027049 | 0.0040116 | 0.0036055 | 0.00285   | 0.0019712 | 0.0096446 | 0.0024088 |
| 0.002878  | 0.002756  | 0.0024733 | 0.0023733 | 0.0047247 | 0.0036931 | 0.0030092 | 0.0019981 | 0.0086241 | 0.0022446 |
| 0.0036666 | 0.002038  | 0.0013012 | 0.0042039 | 0.0023454 | 0.0037299 | 0.0036568 | 0.002119  | 0.0099751 | 0.0034494 |
| 0.0025353 | 0.0037227 | 0.0016182 | 0.002693  | 0.0024375 | 0.004397  | 0.0033153 | 0.0022478 | 0.0076118 | 0.0028092 |
| 0.0030517 | 0.0030463 | 0.0018769 | 0.0032571 | 0.0024295 | 0.0039937 | 0.003047  | 0.0016889 | 0.0085442 | 0.0027118 |
| 0.0028433 | 0.0030728 | 0.0016713 | 0.0032108 | 0.0023033 | 0.0049968 | 0.0032275 | 0.0017669 | 0.0067376 | 0.0030642 |
| 0.0039359 | 0.003773  | 0.0022596 | 0.0032519 | 0.0028797 | 0.0041529 | 0.0040602 | 0.0018193 | 0.0082833 | 0.0027429 |
| 0.0031966 | 0.0036332 | 0.00236   | 0.0038724 | 0.0023467 | 0.0040751 | 0.0035513 | 0.0017985 | 0.0092833 | 0.0027967 |
| 0.0041268 | 0.0039172 | 0.0014255 | 0.0028986 | 0.0023616 | 0.0049955 | 0.0036036 | 0.0018802 | 0.0080561 | 0.0032453 |
| 0.0037673 | 0.0038364 | 0.0009409 | 0.0066675 | 0.0031341 | 0.0036317 | 0.0052884 | 0.0018895 | 0.0049265 | 0.0015551 |
| 0.0044095 | 0.0057274 | 0.0029691 | 0.0055497 | 0.0012296 | 0.0052528 | 0.003683  | 0.0027387 | 0.0078912 | 0.0042587 |
| 0.0053782 | 0.0057513 | 0.0023517 | 0.0031509 | 0.0027409 | 0.0038645 | 0.0052834 | 0.0026463 | 0.0065739 | 0.0029639 |
| 0.0056423 | 0.0057892 | 0.0026017 | 0.0042973 | 0.0022372 | 0.0035485 | 0.0039692 | 0.0027278 | 0.0079119 | 0.0036037 |
| 0.003883  | 0.0060296 | 0.0015731 | 0.00461   | 0.003968  | 0.0050499 | 0.0053442 | 0.0017995 | 0.0064718 | 0.0029234 |
| 0.0029898 | 0.0049955 | 0.0016507 | 0.0048496 | 0.0014645 | 0.006839  | 0.0015979 | 0.00222   | 0.0026953 | 0.0033011 |
| 0.0033799 | 0.0065061 | 0.00168   | 0.0061582 | 0.0015239 | 0.0073588 | 0.0014696 | 0.0030679 | 0.0018813 | 0.00197   |
| 0.0035471 | 0.0024281 | 0.004325  | 0.0032019 | 0.0054979 | 0.0016436 | 0.0035343 | 0.0056543 | 0.0059806 | 0.0042085 |
| 0.0037733 | 0.0031448 | 0.0013675 | 0.0030376 | 0.0047105 | 0.005143  | 0.0035617 | 0.0023923 | 0.0060967 | 0.0027585 |
| 0.0035877 | 0.003611  | 0.0031558 | 0.0046821 | 0.0057782 | 0.0043618 | 0.0043166 | 0.0022143 | 0.0064646 | 0.0024046 |
| 0.0038416 | 0.0028044 | 0.0016927 | 0.0040644 | 0.0079538 | 0.0041868 | 0.003135  | 0.0017409 | 0.0051843 | 0.0019413 |
| 0.002976  | 0.0029889 | 0.0027319 | 0.0032283 | 0.0050008 | 0.0041281 | 0.0029263 | 0.0018034 | 0.0074819 | 0.0019625 |
| 0.0035183 | 0.0033328 | 0.0030447 | 0.0040781 | 0.0024871 | 0.0021545 | 0.0039027 | 0.0027216 | 0.0088393 | 0.0022121 |
| 0.0051425 | 0.0036188 | 0.0024666 | 0.0045259 | 0.0038711 | 0.0057237 | 0.004894  | 0.0029769 | 0.0059015 | 0.0045132 |
| 0.0065398 | 0.0069112 | 0.0054895 | 0.0059063 | 0.007529  | 0.0057378 | 0.006484  | 0.0037456 | 0.0066898 | 0.005086  |
| 0.0031186 | 0.0057972 | 0.0046343 | 0.0051711 | 0.0045005 | 0.0052298 | 0.0073823 | 0.0026837 | 0.005943  | 0.0023556 |
| 0.004325  | 0.003756  | 0.0019428 | 0.0046007 | 0.010132  | 0.0049503 | 0.0040083 | 0.0024267 | 0.0042625 | 0.0023098 |
| 0.0055671 | 0.0048091 | 0.00222   | 0.0053834 | 0.0089087 | 0.0050359 | 0.0052245 | 0.0027315 | 0.0044753 | 0.0022623 |
| 0.0036294 | 0.0059573 | 0.0057431 | 0.0078    | 0.002286  | 0.0064921 | 0.0052943 | 0.001293  | 0.005678  | 0.0021253 |
| 0.0045644 | 0.0048878 | 0.0044477 | 0.0048136 | 0.0032564 | 0.0056543 | 0.0047663 | 0.0014746 | 0.0053895 | 0.0027429 |
| 0.0035939 | 0.0042521 | 0.0034956 | 0.0042274 | 0.00265   | 0.0044039 | 0.0038825 | 0.0011798 | 0.0073653 | 0.0020637 |
| 0.0038993 | 0.0097069 | 0.0044703 | 0.0080875 | 0.0043139 | 0.0050167 | 0.0039073 | 0.0016661 | 0.0059704 | 0.002833  |
| 0.0033832 | 0.0070168 | 0.005835  | 0.0101069 | 0.0043361 | 0.0061548 | 0.0054315 | 0.0015058 | 0.0059729 | 0.0034002 |
| 0.0047756 | 0.00363   | 0.0016486 | 0.0055073 | 0.008001  | 0.0044082 | 0.0027484 | 0.0014024 | 0.0045991 | 0.0033365 |
| 0.0047796 | 0.0036332 | 0.0016489 | 0.0055146 | 0.0080099 | 0.0044126 | 0.0027501 | 0.0014021 | 0.0046034 | 0.0033381 |
| 0.005292  | 0.0046837 | 0.0023626 | 0.0066402 | 0.0075002 | 0.0050249 | 0.0034385 | 0.0015662 | 0.0049682 | 0.0031188 |
| 0.0052128 | 0.0048795 | 0.0023893 | 0.006617  | 0.0066419 | 0.0046858 | 0.003767  | 0.0018745 | 0.0051178 | 0.0029999 |
| 0.0052099 | 0.0048776 | 0.0023885 | 0.0066142 | 0.0066394 | 0.0046839 | 0.0037653 | 0.001874  | 0.0051159 | 0.0030011 |
| 0.0033478 | 0.005906  | 0.0042459 | 0.0062622 | 0.0051622 | 0.0056545 | 0.0042435 | 0.002422  | 0.0068707 | 0.0053633 |
| 0.0033627 | 0.0059825 | 0.0042845 | 0.0063603 | 0.0052006 | 0.0057228 | 0.0042742 | 0.0024991 | 0.0069605 | 0.0053927 |
| 0.0040913 | 0.0049919 | 0.0033353 | 0.0063302 | 0.0056474 | 0.0055527 | 0.0036266 | 0.0020662 | 0.004627  | 0.0039668 |
| 0.0039713 | 0.0060452 | 0.0036616 | 0.0070113 | 0.0046097 | 0.0057669 | 0.0044098 | 0.0024603 | 0.0046792 | 0.0038173 |
| 0.0041258 | 0.0055585 | 0.003611  | 0.0062057 | 0.0060768 | 0.0051072 | 0.0043742 | 0.0022659 | 0.004441  | 0.003701  |
| 0.0035837 | 0.0063993 | 0.0035399 | 0.0076997 | 0.0055355 | 0.0055312 | 0.0047975 | 0.0041269 | 0.0046851 | 0.0032362 |
| 0.0042197 | 0.0047333 | 0.0030249 | 0.0064815 | 0.0071891 | 0.0052825 | 0.0035284 | 0.0024136 | 0.0054989 | 0.002413  |
| 0.0042536 | 0.0045222 | 0.0033182 | 0.0065225 | 0.0071269 | 0.0048722 | 0.0035788 | 0.0026255 | 0.005567  | 0.0026681 |
| 0.0040487 | 0.0049882 | 0.003159  | 0.0061792 | 0.0057219 | 0.0044335 | 0.0039298 | 0.0029805 | 0.0054794 | 0.0027864 |
| 0.0040443 | 0.0048955 | 0.0031826 | 0.0062095 | 0.0058246 | 0.0044108 | 0.0039392 | 0.002962  | 0.0055757 | 0.0027865 |
| 0.0022824 | 0.0046512 | 0.00492   | 0.0056965 | 0.0050704 | 0.0045716 | 0.0052295 | 0.0019822 | 0.0023694 | 0.002318  |
| 0.0025129 | 0.004846  | 0.0033349 | 0.0061477 | 0.00386   | 0.0043972 | 0.0052188 | 0.0013189 | 0.0022358 | 0.0022467 |
| 0.0025164 | 0.0048469 | 0.0033353 | 0.0061455 | 0.0038637 | 0.0043987 | 0.0052197 | 0.0012957 | 0.0022386 | 0.0022502 |
| 0.0042287 | 0.0045286 | 0.0034043 | 0.0056328 | 0.0122886 | 0.0037032 | 0.0024513 | 0.0015004 | 0.0037362 | 0.0033697 |
| 0.0046588 | 0.0039256 | 0.0035911 | 0.0054706 | 0.008733  | 0.0029723 | 0.0031456 | 0.0015882 | 0.0038045 | 0.0030352 |
| 0.0052744 | 0.0038757 | 0.0035849 | 0.0059095 | 0.0089103 | 0.0029014 | 0.0031461 | 0.0014539 | 0.0038234 | 0.0032323 |
| 0.0037984 | 0.0065962 | 0.0073642 | 0.0044547 | 0.0032821 | 0.0039538 | 0.0052097 | 0.0021007 | 0.0047426 | 0.0016107 |
| 0.0038184 | 0.0052304 | 0.0047663 | 0.0061825 | 0.0025768 | 0.0061633 | 0.004658  | 0.0034652 | 0.0042962 | 0.0043835 |
| 0.0040192 | 0.0049993 | 0.0046013 | 0.0066012 | 0.0023262 | 0.005977  | 0.0045629 | 0.0033797 | 0.0045361 | 0.0043386 |
| 0.0035193 | 0.0060065 | 0.0050785 | 0.00849   | 0.0051261 | 0.0080519 | 0.005279  | 0.0019262 | 0.0036316 | 0.0028346 |
| 0.0035059 | 0.0062215 | 0.0051464 | 0.0087394 | 0.0047972 | 0.0074442 | 0.0053396 | 0.0019948 | 0.0041049 | 0.0030856 |

|           |           |           |           |           |           |           |           |           |           |
|-----------|-----------|-----------|-----------|-----------|-----------|-----------|-----------|-----------|-----------|
| 0.005075  | 0.0048584 | 0.0047723 | 0.0070242 | 0.0048231 | 0.0059806 | 0.0056304 | 0.0017623 | 0.0041923 | 0.0029216 |
| 0.0043736 | 0.0052452 | 0.0050089 | 0.0074453 | 0.0052729 | 0.0068993 | 0.0058091 | 0.0018385 | 0.0038876 | 0.0031317 |
| 0.0058622 | 0.0016004 | 0.0043295 | 0.0004277 | 0.004957  | 0.0044714 | 0.0052027 | 0.0042358 | 0.0045816 | 0.0044301 |
| 0.0057587 | 0.0038219 | 0.0028945 | 0.0058616 | 0.0041041 | 0.0038887 | 0.0069982 | 0.0038514 | 0.004915  | 0.0049504 |
| 0.0049724 | 0.0045883 | 0.003946  | 0.0040892 | 0.0049274 | 0.0038712 | 0.0045426 | 0.0038687 | 0.0041702 | 0.0040375 |
| 0.0061248 | 0.0058924 | 0.0032934 | 0.0059477 | 0.0013081 | 0.0046711 | 0.0025526 | 0.0040063 | 0.0064469 | 0.0048742 |
| 0.0079955 | 0.0082394 | 0.005504  | 0.0049912 | 0.0017436 | 0.0030396 | 0.0055761 | 0.0061726 | 0.0061429 | 0.0045963 |
| 0.0058892 | 0.0042635 | 0.0045507 | 0.0059882 | 0.0052732 | 0.006089  | 0.0048847 | 0.0033714 | 0.0052263 | 0.0038914 |
| 0.0048873 | 0.0065197 | 0.0059465 | 0.0062148 | 0.0057257 | 0.0068752 | 0.0060108 | 0.0030083 | 0.0041084 | 0.0028826 |
| 0.0059461 | 0.0074628 | 0.0043628 | 0.0060797 | 0.0031577 | 0.005033  | 0.0060084 | 0.0033926 | 0.0051808 | 0.0035836 |
| 0.0027287 | 0.0081549 | 0.0082383 | 0.0097986 | 0.0035602 | 0.0072314 | 0.0098483 | 0.0027389 | 0.0027856 | 0.0016607 |
| 0.00506   | 0.0056883 | 0.006093  | 0.0059381 | 0.0013991 | 0.0064518 | 0.0054632 | 0.0019623 | 0.006063  | 0.0019229 |
| 0.0044953 | 0.0063673 | 0.0066891 | 0.0075861 | 0.0015572 | 0.0073564 | 0.0062554 | 0.0020753 | 0.0052309 | 0.0019444 |
| 0.0046873 | 0.0062609 | 0.0069224 | 0.006637  | 0.0012792 | 0.0064676 | 0.0064332 | 0.0021758 | 0.0062677 | 0.0020828 |
| 0.0043768 | 0.006005  | 0.0049656 | 0.0057093 | 0.0012556 | 0.0045353 | 0.0046367 | 0.0075122 | 0.008623  | 0.0024167 |
| 0.0044704 | 0.0079105 | 0.0080038 | 0.0070795 | 0.0013257 | 0.0090562 | 0.0093623 | 0.0040007 | 0.0036805 | 0.0027314 |
| 0.0041032 | 0.0085443 | 0.0079799 | 0.0066645 | 0.0012814 | 0.0083115 | 0.0079669 | 0.0048013 | 0.004179  | 0.0028521 |
| 0.0039132 | 0.0081443 | 0.0076289 | 0.0081238 | 0.001227  | 0.0087089 | 0.0091563 | 0.0034063 | 0.0039763 | 0.0024943 |
| 0.0033376 | 0.0081333 | 0.0079124 | 0.0087297 | 0.0007775 | 0.0084992 | 0.0096416 | 0.0032585 | 0.0050248 | 0.0027543 |
| 0.0053553 | 0.0055128 | 0.0060129 | 0.0062602 | 0.0019383 | 0.00671   | 0.0059054 | 0.0025931 | 0.0058663 | 0.0022969 |
| 0.0054105 | 0.0057804 | 0.0065219 | 0.005297  | 0.0019112 | 0.0068377 | 0.0062972 | 0.0027598 | 0.0045975 | 0.002559  |
| 0.0051532 | 0.0061774 | 0.0067301 | 0.0057639 | 0.0018453 | 0.007395  | 0.0068344 | 0.0030281 | 0.0045788 | 0.0026454 |
| 0.0040476 | 0.0072451 | 0.0077241 | 0.0080241 | 0.0010534 | 0.0074734 | 0.0068169 | 0.0025039 | 0.0059395 | 0.0034038 |
| 0.0046592 | 0.007414  | 0.007872  | 0.0068553 | 0.0016093 | 0.0085907 | 0.0084045 | 0.0036353 | 0.0039215 | 0.0027024 |
| 0.0048304 | 0.0069087 | 0.0073528 | 0.0066258 | 0.0016921 | 0.0079107 | 0.0076762 | 0.0031659 | 0.0044059 | 0.0026999 |
| 0.0034102 | 0.0054115 | 0.0081983 | 0.0042299 | 0.001521  | 0.0035658 | 0.0038025 | 0.0026658 | 0.0041713 | 0.0021893 |
| 0.004788  | 0.0060263 | 0.011363  | 0.00502   | 0.0013071 | 0.0060952 | 0.0054303 | 0.0031235 | 0.0037234 | 0.0020116 |
| 0.0045945 | 0.0045668 | 0.0113554 | 0.0041483 | 0.0017115 | 0.0064025 | 0.004303  | 0.0041553 | 0.0036004 | 0.0019143 |
| 0.0069551 | 0.0087914 | 0.0076557 | 0.0123271 | 0.001912  | 0.0070989 | 0.0068443 | 0.0035627 | 0.0053514 | 0.0013362 |
| 0.0052894 | 0.0053208 | 0.0082895 | 0.0075351 | 0.0011322 | 0.0078802 | 0.0059841 | 0.0014717 | 0.0055458 | 0.0028437 |
| 0.0033806 | 0.0075688 | 0.0072284 | 0.010049  | 0.0012395 | 0.007957  | 0.0069408 | 0.001787  | 0.0057363 | 0.0048004 |
| 0.005354  | 0.0084858 | 0.0065853 | 0.0088334 | 0.0014436 | 0.0068618 | 0.0072072 | 0.0033383 | 0.0058181 | 0.0030101 |
| 0.0039189 | 0.0078769 | 0.0078373 | 0.0080533 | 0.0015029 | 0.0084836 | 0.0082949 | 0.0029221 | 0.0039913 | 0.0023378 |
| 0.0030328 | 0.0083735 | 0.0078433 | 0.0096518 | 0.0013716 | 0.0082594 | 0.0083732 | 0.0023726 | 0.0046813 | 0.0023639 |
| 0.0033105 | 0.0083649 | 0.0075379 | 0.0082025 | 0.0017339 | 0.008424  | 0.0083638 | 0.0024816 | 0.0042602 | 0.0020238 |
| 0.003396  | 0.0089468 | 0.0068834 | 0.0081979 | 0.0035529 | 0.0081426 | 0.0074269 | 0.0021358 | 0.0039515 | 0.0022832 |
| 0.0036608 | 0.0080294 | 0.0069017 | 0.008621  | 0.0019489 | 0.0077876 | 0.0081083 | 0.0028552 | 0.0040708 | 0.0025547 |
| 0.0029951 | 0.0093405 | 0.0084775 | 0.0085202 | 0.0022268 | 0.009171  | 0.008657  | 0.0025437 | 0.0033668 | 0.0018582 |
| 0.0039364 | 0.0072311 | 0.0072794 | 0.0069975 | 0.0019574 | 0.0079181 | 0.007481  | 0.0027667 | 0.0040713 | 0.0020672 |
| 0.003987  | 0.0085409 | 0.0082845 | 0.0071707 | 0.0022147 | 0.0074251 | 0.0100845 | 0.0025323 | 0.0039519 | 0.0020764 |
| 0.0050253 | 0.0060335 | 0.0069279 | 0.0058469 | 0.0028345 | 0.005937  | 0.0072899 | 0.0040056 | 0.0047684 | 0.0028052 |
| 0.0040845 | 0.0065791 | 0.0059288 | 0.0072154 | 0.0032279 | 0.0052684 | 0.0072664 | 0.0029178 | 0.0053165 | 0.0022671 |
| 0.0043059 | 0.007658  | 0.007374  | 0.0075062 | 0.0017877 | 0.0075088 | 0.007471  | 0.0029051 | 0.0042719 | 0.0021814 |
| 0.0047837 | 0.0064838 | 0.0070401 | 0.0062591 | 0.0017415 | 0.0072539 | 0.0068741 | 0.0029403 | 0.0044132 | 0.002439  |
| 0.0046976 | 0.0068885 | 0.0071504 | 0.0066802 | 0.0016828 | 0.0076053 | 0.0072475 | 0.0030539 | 0.004382  | 0.0024425 |
| 0.0043204 | 0.0067712 | 0.0068195 | 0.0062372 | 0.0020342 | 0.0075103 | 0.0068703 | 0.0022752 | 0.0041989 | 0.0021756 |
| 0.0039589 | 0.0085178 | 0.007228  | 0.0090629 | 0.0021251 | 0.0068353 | 0.0061278 | 0.0021668 | 0.0060828 | 0.001961  |
| 0.004406  | 0.0028549 | 0.0045075 | 0.0074231 | 0.0016733 | 0.0052475 | 0.0070839 | 0.0024334 | 0.001305  | 0.0034468 |
| 0.0036258 | 0.006173  | 0.006917  | 0.006638  | 0.0006574 | 0.0074395 | 0.0080114 | 0.0028044 | 0.0051731 | 0.0054328 |
| 0.0031264 | 0.0064585 | 0.0068163 | 0.0100893 | 0.0014639 | 0.0071551 | 0.0073371 | 0.002072  | 0.0087511 | 0.0056226 |
| 0.0032056 | 0.0064992 | 0.0064307 | 0.0086104 | 0.0010236 | 0.0069903 | 0.0069111 | 0.0023829 | 0.0081351 | 0.0068429 |
| 0.0034649 | 0.0071543 | 0.0067482 | 0.0062687 | 0.0003598 | 0.0061598 | 0.0070914 | 0.0028939 | 0.0061906 | 0.0033093 |
| 0.0025324 | 0.0075086 | 0.0068905 | 0.009562  | 0.000549  | 0.0055869 | 0.00715   | 0.0023647 | 0.0064793 | 0.0028584 |
| 0.0040196 | 0.0067245 | 0.0058112 | 0.0061802 | 0.0003381 | 0.0057362 | 0.0055106 | 0.0028551 | 0.0053455 | 0.0034802 |
| 0.0076372 | 0.0023151 | 0.0035573 | 0.0023451 | 0.0141929 | 0.0013325 | 0.0037009 | 0.0156251 | 0.0023836 | 0.0061502 |
| 0.0084016 | 0.0018265 | 0.0043677 | 0.0020227 | 0.0191694 | 0.0015779 | 0.0025838 | 0.012469  | 0.0022981 | 0.0053941 |
| 0.0030499 | 0.0042058 | 0.0025515 | 0.0037162 | 0.0145265 | 0.0072083 | 0.0058769 | 0.0039473 | 0.0013271 | 0.0020531 |
| 0.005383  | 0.0026204 | 0.00322   | 0.0020896 | 0.0094455 | 0.0054201 | 0.005675  | 0.0056344 | 0.0017383 | 0.002809  |

|           |           |           |           |           |           |           |           |           |           |
|-----------|-----------|-----------|-----------|-----------|-----------|-----------|-----------|-----------|-----------|
| 0.0042235 | 0.002185  | 0.0018164 | 0.0026535 | 0.003104  | 0.0033054 | 0.0038232 | 0.0020758 | 0.0028558 | 0.0036158 |
| 0.003379  | 0.0065644 | 0.0022165 | 0.0113893 | 0.0071101 | 0.0036321 | 0.0044602 | 0.0035655 | 0.0032072 | 0.0044823 |
| 0.0046939 | 0.0036301 | 0.0015171 | 0.0073536 | 0.0055871 | 0.0018907 | 0.0043726 | 0.0047249 | 0.0016557 | 0.0040707 |
| 0.0083158 | 0.0023006 | 0.0015365 | 0.0052708 | 0.0045385 | 0.0008945 | 0.0047701 | 0.0046678 | 0.0014535 | 0.004025  |
| 0.0059386 | 0.002883  | 0.0021509 | 0.0078021 | 0.0017816 | 0.0016571 | 0.0035197 | 0.0045489 | 0.0055366 | 0.0031082 |
| 0.0059499 | 0.0046968 | 0.003038  | 0.0223928 | 0.0089351 | 0.0041985 | 0.0042194 | 0.0051547 | 0.0104518 | 0.0065805 |
| 0.001758  | 0.0053024 | 0.0039778 | 0.0044898 | 0.0072904 | 0.0046549 | 0.0082472 | 0.0071155 | 0.0045231 | 0.0074184 |
| 0.0056749 | 0.005822  | 0.0023105 | 0.0041902 | 0.0151474 | 0.0047901 | 0.0058344 | 0.0062174 | 0.0046808 | 0.0073887 |
| 0.0108034 | 0.0048408 | 0.0063586 | 0.0043493 | 0.0056126 | 0.0054418 | 0.0042246 | 0.0088933 | 0.0080713 | 0.0088048 |
| 0.009204  | 0.0039979 | 0.006016  | 0.0033309 | 0.0075751 | 0.0054934 | 0.0043737 | 0.0096271 | 0.0066683 | 0.0098988 |
| 0.0045016 | 0.0075274 | 0.0086952 | 0.0052359 | 0.0051775 | 0.0050152 | 0.0067803 | 0.0043078 | 0.0018704 | 0.0029724 |
| 0.0050739 | 0.0089145 | 0.0062197 | 0.0060629 | 0.0035226 | 0.0057925 | 0.0081473 | 0.0057492 | 0.0017283 | 0.0022771 |
| 0.0052976 | 0.0051432 | 0.0091346 | 0.0029043 | 0.0031785 | 0.005318  | 0.0050401 | 0.0092008 | 0.0016348 | 0.0025579 |
| 0.0056429 | 0.0058406 | 0.0125343 | 0.002764  | 0.0027907 | 0.0042319 | 0.0047167 | 0.0090071 | 0.0014345 | 0.0039887 |
| 0.0059064 | 0.0062621 | 0.0166946 | 0.0024074 | 0.0020028 | 0.0034153 | 0.0046719 | 0.0104733 | 0.0022436 | 0.0040058 |
| 0.0040015 | 0.0080206 | 0.0092071 | 0.0038775 | 0.0011147 | 0.0035018 | 0.0072955 | 0.0061516 | 0.0011617 | 0.0021612 |
| 0.005397  | 0.0080521 | 0.0086968 | 0.0034524 | 0.001787  | 0.0037582 | 0.00743   | 0.0039147 | 0.0020629 | 0.0012163 |
| 0.0037662 | 0.0085458 | 0.0064099 | 0.005442  | 0.002545  | 0.0052607 | 0.0077065 | 0.0052242 | 0.0016392 | 0.0019177 |
| 0.0041432 | 0.010281  | 0.0060472 | 0.0064927 | 0.0022126 | 0.0055107 | 0.0088252 | 0.0050076 | 0.0018039 | 0.0026609 |
| 0.0061232 | 0.0044992 | 0.0086504 | 0.0020607 | 0.0019378 | 0.0020471 | 0.0047971 | 0.0082859 | 0.0020831 | 0.0090155 |
| 0.0083126 | 0.0023812 | 0.0045961 | 0.0016294 | 0.0034372 | 0.0024782 | 0.0068786 | 0.0028271 | 0.0017614 | 0.0044924 |
| 0.0035959 | 0.005408  | 0.001361  | 0.0038054 | 0.011153  | 0.0028116 | 0.00642   | 0.0046619 | 0.0045311 | 0.0049541 |
| 0.0047674 | 0.0029057 | 0.0078129 | 0.0023485 | 0.006328  | 0.0026754 | 0.0029758 | 0.0060032 | 0.0030709 | 0.005472  |
| 0.0046871 | 0.0028196 | 0.0076306 | 0.0023749 | 0.006153  | 0.0025951 | 0.0031711 | 0.0057498 | 0.0032589 | 0.0057078 |
| 0.0041157 | 0.0040088 | 0.0039683 | 0.0031192 | 0.0045544 | 0.0041721 | 0.0028366 | 0.0051947 | 0.0022456 | 0.0044453 |
| 0.0052261 | 0.0023407 | 0.0091874 | 0.0026906 | 0.0037539 | 0.0033506 | 0.0026448 | 0.0038941 | 0.0029936 | 0.0033005 |
| 0.0040424 | 0.0030269 | 0.0060761 | 0.0017165 | 0.0037305 | 0.0046715 | 0.003622  | 0.0089998 | 0.0022257 | 0.0032765 |
| 0.0037858 | 0.002574  | 0.0069753 | 0.0017362 | 0.0037489 | 0.0048006 | 0.0037305 | 0.0095415 | 0.0024855 | 0.0022742 |
| 0.0020819 | 0.0057143 | 0.0026612 | 0.0049921 | 0.0031924 | 0.0053099 | 0.0038156 | 0.0056503 | 0.0049715 | 0.0075727 |
| 0.0024119 | 0.0071216 | 0.0029391 | 0.0023928 | 0.0036752 | 0.0044527 | 0.0037828 | 0.0030105 | 0.0032337 | 0.0032051 |
| 0.0027065 | 0.006612  | 0.0026933 | 0.0023917 | 0.0035542 | 0.0042777 | 0.0039764 | 0.0027254 | 0.0029683 | 0.0034489 |
| 0.0027103 | 0.0047122 | 0.0054975 | 0.0038233 | 0.0087162 | 0.0063257 | 0.0052628 | 0.0021793 | 0.0011882 | 0.0034269 |
| 0.0035345 | 0.0062093 | 0.0074885 | 0.0047934 | 0.0087676 | 0.0055881 | 0.0039279 | 0.0028229 | 0.0014688 | 0.0030749 |
| 0.0037194 | 0.0056103 | 0.0072249 | 0.0043701 | 0.0099594 | 0.0038496 | 0.0043126 | 0.0040149 | 0.0014472 | 0.0032446 |
| 0.0038357 | 0.0082683 | 0.0076887 | 0.0052628 | 0.0041637 | 0.0044375 | 0.0052709 | 0.0041548 | 0.003486  | 0.0035691 |
| 0.003633  | 0.0078613 | 0.0056114 | 0.0050431 | 0.0062865 | 0.0074572 | 0.003293  | 0.0094257 | 0.0017084 | 0.0036676 |

Table S41. The p value between oral OTUs and gut OTUs of CP (n=11) and HC (n=18) obtained by spearman correlation analysis

| p.value                                   | F_OTU10..Ba<br>cteroides. | F_OTU51..Str<br>eptococcus. | F_OTU64..Fa<br>ecalibacterium<br>. | F_OTU84..Ba<br>cteroides. | F_OTU89..Ps<br>eudobutyri<br>vibr<br>io. | F_OTU124..B<br>acteroides. | F_OTU239..L<br>achnospiracea<br>e_Incertae_Se<br>dis. | F_OTU613..K<br>lebsiella. |
|-------------------------------------------|---------------------------|-----------------------------|------------------------------------|---------------------------|------------------------------------------|----------------------------|-------------------------------------------------------|---------------------------|
| T_OTU87 (Neisseria)                       | 0.093566214               | 0.102590003                 | 0.091695802                        | 0.010256174               | 0.008729078                              | 0.033453539                | 0.026553699                                           | 0.410634284               |
| T_OTU186 (Leptotrichia)                   | 0.061961276               | 0.463732097                 | 0.010279916                        | 0.254321982               | 0.267307543                              | 0.084719549                | 0.077298722                                           | 0.144771304               |
| T_OTU307 (Leptotrichia)                   | 0.182697515               | 0.360693727                 | 0.114792657                        | 0.445150446               | 0.010358464                              | 0.402708688                | 0.079629418                                           | 0.432814305               |
| T_OTU331 (Leptotrichia)                   | 0.620787899               | 0.341270777                 | 0.825212455                        | 0.28061538                | 0.105189865                              | 0.352739712                | 0.590695005                                           | 0.679850725               |
| T_OTU372 (Prevotella)                     | 0.150947698               | 0.513089183                 | 0.572367093                        | 0.211102108               | 0.74695695                               | 0.4929511                  | 0.742254708                                           | 0.636906078               |
| T_OTU575 (Fusobacterium)                  | 0.034298259               | 0.248883892                 | 0.01322118                         | 0.093140886               | 2.36E-05                                 | 0.003562324                | 1.53E-05                                              | 0.170267515               |
| T_OTU688 (Streptococcus)                  | 0.004013812               | 0.003207857                 | 3.14E-05                           | 0.036833656               | 0.055333679                              | 0.021167687                | 5.69E-04                                              | 0.001303676               |
| T_OTU778<br>(Actinobacteria_unclassified) | 0.772537225               | 0.352280857                 | 0.570776653                        | 0.784361076               | 0.030316957                              | 0.127560889                | 0.237229449                                           | 0.443362605               |
| T_OTU965 (Leptotrichia)                   | 0.803246202               | 0.686924271                 | 0.748702651                        | 0.181762745               | 0.135921867                              | 0.4768015                  | 0.269259148                                           | 0.891204367               |
| T_OTU1038 (Lachnoanaerobaculum)           | 0.58678409                | 0.251978535                 | 0.023223098                        | 0.710080575               | 0.021805932                              | 0.766565902                | 0.237814613                                           | 0.479633255               |
| T_OTU1045 (Actinomyces)                   | 0.917043228               | 0.836267345                 | 0.721360867                        | 0.643971021               | 0.485439032                              | 0.417748408                | 0.254413547                                           | 0.350751714               |
| T_OTU1097 (Leptotrichia)                  | 0.421585353               | 0.001496055                 | 0.001923636                        | 0.005786346               | 0.001398273                              | 0.032300528                | 0.068633221                                           | 0.377219192               |
| T_OTU1135 (Veillonella)                   | 0.088228742               | 0.750695443                 | 0.822167667                        | 0.42030591                | 0.210646431                              | 0.688539322                | 0.567911214                                           | 0.529780396               |
| T_OTU1277 (Actinomyces)                   | 0.953243877               | 0.413434                    | 0.554286114                        | 0.995833336               | 0.315754003                              | 0.300261045                | 0.657494482                                           | 0.057443484               |
| T_OTU1337 (Veillonella)                   | 0.383611284               | 0.474090485                 | 0.835976257                        | 0.125155347               | 0.371434525                              | 0.44796886                 | 0.592888911                                           | 0.497241556               |
| T_OTU1417 (Actinomyces)                   | 0.087516049               | 0.611734124                 | 0.219809245                        | 0.832965764               | 0.683801639                              | 0.211536872                | 0.608646983                                           | 0.087855454               |
| T_OTU1451 (Citrobacter)                   | 0.084631533               | 0.062784932                 | 0.11868951                         | 0.153865423               | 6.94E-04                                 | 0.091156989                | 6.27E-04                                              | 0.142466468               |
| T_OTU1642 (Haemophilus)                   | 1.43E-04                  | 0.022511609                 | 1.93E-04                           | 0.002786974               | 4.20E-04                                 | 0.001727622                | 0.002079336                                           | 0.06739497                |
| T_OTU1662 (Campylobacter)                 | 0.031858147               | 0.424862111                 | 0.27497498                         | 0.782447065               | 0.36304629                               | 0.865342758                | 0.58408706                                            | 0.908689                  |
| T_OTU1815 (Granulicatella)                | 0.064848342               | 0.088302907                 | 0.023281597                        | 0.135398549               | 0.261119446                              | 0.67270791                 | 0.152950016                                           | 0.057577236               |
| T_OTU1868 (Prevotella)                    | 5.36E-04                  | 0.10327624                  | 2.06E-04                           | 0.085019185               | 0.006377427                              | 0.004840902                | 0.003622684                                           | 0.004677577               |
| T_OTU1981 (Prevotella)                    | 0.935260295               | 0.149449729                 | 0.705682748                        | 0.104012151               | 0.93172299                               | 0.781068327                | 0.334629464                                           | 0.731107277               |
| T_OTU2028 (Porphyromonas)                 | 0.006067335               | 0.061982206                 | 1.98E-04                           | 0.008390682               | 0.012605118                              | 0.00896715                 | 0.012352397                                           | 0.280690233               |
| T_OTU2083 (Neisseria)                     | 0.014591266               | 0.055643685                 | 8.35E-04                           | 0.001381625               | 0.006175344                              | 1.40E-05                   | 3.57E-04                                              | 0.688383778               |
| T_OTU2140 (Leptotrichia)                  | 0.37869776                | 0.229288143                 | 0.702009599                        | 0.111227999               | 0.072463442                              | 0.274867444                | 0.441830137                                           | 0.892200607               |
| T_OTU2284 (Porphyromonas)                 | 6.68E-04                  | 0.030346626                 | 3.95E-05                           | 0.010340755               | 0.00483404                               | 0.004043267                | 0.019351253                                           | 0.271107622               |
| T_OTU2514 (Streptococcus)                 | 0.057085232               | 0.034152895                 | 0.027055435                        | 0.325227757               | 0.597848537                              | 0.75065381                 | 0.878888758                                           | 0.472262772               |
| T_OTU2662 (Actinomyces)                   | 0.48929796                | 0.25422579                  | 0.263543836                        | 0.989063985               | 0.461774531                              | 0.65561224                 | 0.531654294                                           | 0.245472502               |

| F_OTU754..D<br>ialister. | F_OTU787..L<br>achnospiracea<br>e_Incertae_Se<br>dis. | F_OTU844..R<br>othia. | F_OTU950..B<br>ifidobacterium<br>. | F_OTU971..F<br>aealibacteriu<br>m. | F_OTU1000..<br>Blautia. | F_OTU1065..<br>Bacteroides. | F_OTU1112..<br>Bacteroides. | F_OTU1126..<br>Ruminococcac<br>eae_unclassifi<br>ed. | F_OTU1145..<br>Lachnospira. | F_OTU1153..<br>Roseburia. |
|--------------------------|-------------------------------------------------------|-----------------------|------------------------------------|------------------------------------|-------------------------|-----------------------------|-----------------------------|------------------------------------------------------|-----------------------------|---------------------------|
| 0.123490166              | 0.349899302                                           | 0.039663643           | 0.092327855                        | 0.1122919                          | 0.009943633             | 0.020175735                 | 0.085508165                 | 0.068484066                                          | 0.016313326                 | 0.002344006               |
| 0.105559373              | 0.30436308                                            | 0.589610523           | 0.001737684                        | 0.05561347                         | 0.085650651             | 0.019434528                 | 0.61030478                  | 0.04010405                                           | 0.218370617                 | 0.24563596                |
| 0.458218683              | 0.093468595                                           | 0.278443692           | 0.519568797                        | 0.253187386                        | 0.153320347             | 0.099101635                 | 0.076602581                 | 0.260156358                                          | 0.046021057                 | 0.009155154               |
| 0.964594888              | 0.589700826                                           | 0.128525731           | 0.585910873                        | 0.963710412                        | 0.08758202              | 0.942188627                 | 0.206467478                 | 0.839695758                                          | 0.350114224                 | 0.18951892                |
| 0.881566334              | 0.735444237                                           | 0.864011456           | 0.68438496                         | 0.850034308                        | 0.437636592             | 0.062908827                 | 0.495583983                 | 0.953159746                                          | 0.485508944                 | 0.934248331               |
| 0.045481071              | 0.002127178                                           | 0.050713701           | 0.085178767                        | 0.17376865                         | 2.34E-04                | 6.28E-04                    | 0.019500891                 | 0.193929066                                          | 6.45E-04                    | 6.03E-05                  |
| 0.039749515              | 0.049371411                                           | 1.16E-04              | 0.002114504                        | 0.002542083                        | 1.06E-05                | 0.001363145                 | 0.467553804                 | 0.001237885                                          | 0.00195953                  | 0.019883194               |
| 0.693347957              | 0.883367681                                           | 0.419234942           | 0.884306489                        | 0.749053451                        | 0.736642907             | 0.783182188                 | 0.424566527                 | 0.921655528                                          | 0.243250935                 | 0.070644367               |
| 0.541257437              | 0.179255908                                           | 0.704838631           | 0.225118373                        | 0.925164815                        | 0.565392163             | 0.176602174                 | 0.030942823                 | 0.471674494                                          | 0.295449055                 | 0.540338856               |
| 0.800585647              | 0.184687466                                           | 0.358016849           | 0.125688718                        | 0.049753018                        | 0.247231181             | 0.265430887                 | 0.961183743                 | 0.040173552                                          | 0.098728442                 | 0.083116331               |
| 0.881566334              | 0.501685179                                           | 0.677494323           | 0.335320671                        | 0.337454852                        | 0.629652318             | 0.294935627                 | 0.62741853                  | 0.77999643                                           | 0.383135215                 | 0.754748875               |
| 0.6732383                | 0.186414623                                           | 1.11E-04              | 0.15531613                         | 7.17E-04                           | 0.100043351             | 0.104647995                 | 0.806481353                 | 2.44E-04                                             | 0.321340467                 | 0.003369556               |
| 0.13152796               | 0.839229268                                           | 0.553093559           | 0.424525544                        | 0.327408669                        | 0.501430009             | 0.266557179                 | 0.576285572                 | 0.471898728                                          | 0.733146205                 | 0.492264181               |
| 0.788861862              | 0.805962801                                           | 0.124607354           | 0.695976224                        | 0.447095472                        | 0.719856738             | 0.874098128                 | 0.837863714                 | 0.624656712                                          | 0.858748838                 | 0.364478363               |
| 0.16014581               | 0.832748371                                           | 0.969053239           | 0.880351852                        | 0.558615691                        | 0.574162944             | 0.208754838                 | 0.364597911                 | 0.6326984                                            | 0.987896189                 | 0.455231206               |
| 0.819517302              | 0.761253153                                           | 0.333585607           | 0.107165291                        | 0.490068509                        | 0.221465627             | 0.328413911                 | 0.071043869                 | 0.375977763                                          | 0.501528793                 | 0.74770971                |
| 0.00768809               | 0.057848652                                           | 0.067210699           | 0.08747113                         | 0.014911117                        | 0.002018468             | 0.004205068                 | 0.063602081                 | 0.015283259                                          | 1.32E-04                    | 7.53E-04                  |
| 0.037268028              | 0.051023482                                           | 0.001878806           | 0.004898969                        | 0.005080428                        | 9.46E-07                | 2.10E-05                    | 0.082013023                 | 0.00137237                                           | 4.32E-05                    | 1.67E-04                  |
| 0.309276739              | 0.713205587                                           | 0.886733067           | 0.143054408                        | 0.758597759                        | 0.115244686             | 0.145797427                 | 0.998308365                 | 0.918355056                                          | 0.753860545                 | 0.718798138               |
| 0.219995211              | 0.112110953                                           | 0.079090188           | 0.074619261                        | 0.163518912                        | 0.007454955             | 0.054521352                 | 0.023119006                 | 0.219176833                                          | 0.04670798                  | 0.074813113               |
| 0.167608912              | 0.007463451                                           | 0.05128277            | 0.024371079                        | 0.031841307                        | 0.000331795             | 0.0029543                   | 0.064248905                 | 0.022734726                                          | 0.002258027                 | 0.002273725               |
| 0.334609522              | 0.871211778                                           | 0.529239137           | 0.576565862                        | 0.695350637                        | 0.511607467             | 0.364213091                 | 0.090251369                 | 0.906997113                                          | 0.672626658                 | 0.707974968               |
| 0.034254129              | 0.009724919                                           | 0.043742813           | 0.004107762                        | 0.008462344                        | 0.009796968             | 1.28E-04                    | 0.176592423                 | 0.001656027                                          | 9.00E-04                    | 0.007550101               |
| 0.128969431              | 0.034775802                                           | 0.008414162           | 0.337721283                        | 0.007877396                        | 0.002700376             | 4.43E-04                    | 0.872216873                 | 0.001737713                                          | 0.048018539                 | 0.003990725               |
| 0.989255919              | 0.558572141                                           | 0.079273269           | 0.998131974                        | 0.599027354                        | 0.112407737             | 0.57495452                  | 0.287646663                 | 0.614380329                                          | 0.34099748                  | 0.123184241               |
| 0.046077633              | 0.012617077                                           | 0.029791722           | 3.09E-04                           | 0.002609823                        | 0.009649842             | 1.13E-04                    | 0.231585066                 | 4.40E-04                                             | 9.73E-04                    | 0.001410981               |
| 0.484402957              | 0.417806125                                           | 0.06099506            | 0.509986588                        | 0.247623353                        | 0.042519763             | 0.135985613                 | 0.680562328                 | 0.294858363                                          | 0.106721184                 | 0.536083742               |
| 0.220675205              | 0.980444863                                           | 0.480939051           | 0.850873845                        | 0.154230823                        | 0.902504464             | 0.930762888                 | 0.996060645                 | 0.427483725                                          | 0.583226073                 | 0.954211216               |

| F_OTU1167..<br>Anaerostipes. | F_OTU1250..<br>Roseburia. | F_OTU1474..<br>Actinomyces. | F_OTU1493..<br>Akkermansia. | F_OTU1496..<br>Erysipelotrich<br>aceae_Incerta<br>e_Sedis. | F_OTU1572..<br>Actinomyces. | F_OTU1597..<br>Streptococcus. | F_OTU1717..<br>Clostridium_s<br>ensu_stricto. | F_OTU1741..<br>Halomonas. |
|------------------------------|---------------------------|-----------------------------|-----------------------------|------------------------------------------------------------|-----------------------------|-------------------------------|-----------------------------------------------|---------------------------|
| 0.023363637                  | 0.003780658               | 0.089726105                 | 0.034323143                 | 0.657620441                                                | 0.434722296                 | 0.150819243                   | 0.204919122                                   | 0.027660274               |
| 0.085456662                  | 0.091253405               | 0.14377156                  | 0.265124503                 | 0.305200179                                                | 0.099125908                 | 0.170494019                   | 0.218678183                                   | 0.086060295               |
| 0.031906048                  | 0.085826658               | 0.064120406                 | 0.602915347                 | 0.954954214                                                | 0.593291149                 | 0.521628398                   | 0.25916126                                    | 0.023281092               |
| 0.437785566                  | 0.818587664               | 0.942711876                 | 0.810676313                 | 0.366492252                                                | 0.965725408                 | 0.279022763                   | 0.652099865                                   | 0.364823719               |
| 0.396105526                  | 0.934000508               | 0.06092898                  | 0.686731882                 | 0.108418187                                                | 0.103157632                 | 0.934319618                   | 0.696768783                                   | 0.542895129               |
| 6.73E-06                     | 8.51E-06                  | 0.018117755                 | 0.107695373                 | 0.33811738                                                 | 0.253047109                 | 0.127315575                   | 0.007945417                                   | 5.25E-04                  |
| 0.010190967                  | 0.05752107                | 1.98E-06                    | 0.009269347                 | 0.044060848                                                | 0.009456611                 | 0.001300666                   | 0.005854443                                   | 2.59E-07                  |
| 0.280084701                  | 0.076277334               | 0.442553513                 | 0.68003973                  | 0.268251226                                                | 0.437839349                 | 0.245178382                   | 0.642474896                                   | 0.94885966                |
| 0.409475294                  | 0.157850525               | 0.734363461                 | 0.936672855                 | 0.584081817                                                | 0.53305369                  | 0.677320381                   | 0.805148707                                   | 0.755876674               |
| 0.251016917                  | 0.488961021               | 0.140498695                 | 0.179441307                 | 0.749091645                                                | 0.331837423                 | 0.32784762                    | 0.208400821                                   | 0.03990157                |
| 0.384379804                  | 0.351433072               | 0.353101272                 | 0.894640172                 | 0.222329798                                                | 0.01516728                  | 0.963483559                   | 0.595571168                                   | 0.87939336                |
| 0.149842514                  | 0.518240765               | 0.00305279                  | 0.021363668                 | 0.493363567                                                | 0.03726095                  | 0.004960248                   | 0.574702661                                   | 0.011887654               |
| 0.63718468                   | 0.91031914                | 0.336076521                 | 0.998887783                 | 0.088674592                                                | 0.129148282                 | 0.477159906                   | 0.61149758                                    | 0.760874708               |
| 0.423949186                  | 0.168907936               | 0.464442998                 | 0.674648298                 | 0.793439734                                                | 0.85997305                  | 0.158185901                   | 0.679198842                                   | 0.32426741                |
| 0.641430625                  | 0.992071516               | 0.174702303                 | 0.343364016                 | 0.063997532                                                | 0.017735655                 | 0.849018801                   | 0.248575781                                   | 0.902294635               |
| 0.408009577                  | 0.544002223               | 0.501072803                 | 0.41380793                  | 0.247548201                                                | 0.464033311                 | 0.294932403                   | 0.785073877                                   | 0.104636688               |
| 0.044407666                  | 0.004998424               | 0.044060769                 | 0.016350412                 | 0.107257311                                                | 0.583283788                 | 0.204418113                   | 0.038264187                                   | 3.71E-04                  |
| 7.27E-05                     | 5.58E-04                  | 2.10E-04                    | 0.029195901                 | 0.674317248                                                | 0.02325179                  | 0.020647534                   | 0.011111182                                   | 1.62E-07                  |
| 0.8523304                    | 0.956591846               | 0.432756464                 | 0.29734428                  | 0.543407596                                                | 0.275844868                 | 0.989020087                   | 0.911677887                                   | 0.335413511               |
| 0.035194429                  | 0.211464674               | 0.002272733                 | 0.150319045                 | 0.720459711                                                | 0.455344474                 | 0.150990566                   | 0.002213443                                   | 7.12E-04                  |
| 2.20E-04                     | 2.97E-04                  | 0.002101267                 | 0.004277239                 | 0.006445326                                                | 0.16479231                  | 0.055789059                   | 5.98E-06                                      | 8.34E-07                  |
| 0.586931312                  | 0.82379427                | 0.398849037                 | 0.992215026                 | 0.036633655                                                | 0.611269748                 | 0.580132353                   | 0.539019819                                   | 0.745145248               |
| 0.004699076                  | 0.005259753               | 0.002168595                 | 0.001658057                 | 0.192036982                                                | 0.183536525                 | 0.138448446                   | 0.004911108                                   | 1.62E-04                  |
| 0.001759729                  | 6.97E-04                  | 6.08E-04                    | 0.001332914                 | 0.717793216                                                | 0.022158385                 | 0.084536719                   | 0.250555881                                   | 0.011053962               |
| 0.359422917                  | 0.572711497               | 0.702447443                 | 0.83405251                  | 0.135352016                                                | 0.516255807                 | 0.270466136                   | 0.864274973                                   | 0.380218806               |
| 0.00125001                   | 0.003865201               | 8.74E-04                    | 0.008054114                 | 0.356808078                                                | 0.118508683                 | 0.048295501                   | 0.012996107                                   | 1.75E-04                  |
| 0.127444495                  | 0.699032317               | 0.011309191                 | 0.640520667                 | 0.17442521                                                 | 0.128126977                 | 0.172450513                   | 0.091662006                                   | 0.005093051               |
| 0.857240043                  | 0.621970619               | 0.407139328                 | 0.510198674                 | 0.721011021                                                | 0.891120041                 | 0.115991068                   | 0.435070723                                   | 0.332154495               |

Table S41. the p value among oral OTUs, gut OTUs, and lipid molecules of CP (n=37) and CPR (n=18) obtained by spearman correlation analysis

| p.value                                 | TG.26.0.18.1.1 | DG.22.1.18.2. | DG.18.1.22.1. | TG.18.1.22.1.2 | TG.18.1.18.2.2 | TG.18.1.18.2.2 | TG.22.1.18.2.2 | SM.d34.1.   | TG.18.1.22.1.2 |
|-----------------------------------------|----------------|---------------|---------------|----------------|----------------|----------------|----------------|-------------|----------------|
| TG(26:0/18:1/18:2)                      | NA             | 2.18E-13      | 0             | 0              | 0              | 0              | 0              | 1.42E-05    | 0              |
| DG(22:1/18:2)                           | 2.18E-13       | NA            | 0             | 6.20E-14       | 0              | 0              | 4.47E-12       | 1.47E-05    | 7.71E-09       |
| DG(18:1/22:1)                           | 0              | 0             | NA            | 0              | 0              | 0              | 1.01E-12       | 3.16E-05    | 2.62E-11       |
| TG(18:1/22:1/24:1)                      | 0              | 6.20E-14      | 0             | NA             | 0              | 0              | 0              | 1.06E-05    | 0              |
| TG(18:1/18:2/22:1)                      | 0              | 0             | 0             | 0              | NA             | 0              | 0              | 2.82E-05    | 4.44E-15       |
| TG(18:1/18:2/22:0)                      | 0              | 0             | 0             | 0              | 0              | NA             | 0              | 4.59E-05    | 0              |
| TG(22:1/18:2/22:1)                      | 0              | 4.47E-12      | 1.01E-12      | 0              | 0              | 0              | NA             | 1.44E-04    | 0              |
| SM(d34:1)                               | 1.42E-05       | 1.47E-05      | 3.16E-05      | 1.06E-05       | 2.82E-05       | 4.59E-05       | 1.44E-04       | NA          | 6.32E-05       |
| TG(18:1/22:1/24:0)                      | 0              | 7.71E-09      | 2.62E-11      | 0              | 4.44E-15       | 0              | 0              | 6.32E-05    | NA             |
| TG(24:4/16:0/18:1)                      | 1.38E-14       | 0             | 2.22E-16      | 1.11E-15       | 0              | 0              | 1.64E-14       | 1.46E-05    | 1.46E-12       |
| F_OTU315 (Streptococcus)                | 1.88E-04       | 0.001223979   | 0.003457685   | 3.61E-04       | 5.11E-04       | 9.49E-04       | 1.86E-04       | 2.33E-04    | 1.18E-04       |
| F_OTU624 (Halomonas)                    | 7.13E-07       | 1.47E-06      | 3.84E-06      | 1.79E-06       | 9.20E-07       | 8.56E-07       | 2.44E-05       | 1.55E-05    | 1.08E-05       |
| F_OTU920 (Rothia)                       | 2.10E-06       | 4.44E-07      | 7.86E-06      | 3.17E-06       | 6.61E-07       | 1.27E-06       | 1.13E-07       | 1.12E-04    | 1.70E-05       |
| F_OTU953 (Streptococcus)                | 7.30E-06       | 9.16E-05      | 2.45E-04      | 2.49E-05       | 3.39E-05       | 1.48E-04       | 6.79E-05       | 2.29E-05    | 3.55E-04       |
| T_OTU110 (Neisseria)                    | 0.207382435    | 0.143501282   | 0.113548911   | 0.187815403    | 0.160120428    | 0.133438302    | 0.0940696      | 0.572062907 | 0.117816296    |
| T_OTU153 (Neisseria)                    | 0.585701259    | 0.473514343   | 0.654253153   | 0.500736565    | 0.615272772    | 0.499551192    | 0.46810103     | 0.689671212 | 0.68752255     |
| T_OTU181 (Granulicatella)               | 0.192333123    | 0.043304955   | 0.165316127   | 0.163196898    | 0.167455403    | 0.216349882    | 0.422026955    | 0.026467487 | 0.275142889    |
| T_OTU1343 (Actinomyces)                 | 0.001089218    | 9.67E-05      | 2.17E-04      | 0.001016392    | 1.25E-04       | 2.72E-04       | 0.001385375    | 0.003671437 | 0.020362281    |
| T_OTU1412 (Prevotella)                  | 0.982430481    | 0.844917572   | 0.552620903   | 0.960103461    | 0.738816262    | 0.915325951    | 0.85452309     | 0.961730651 | 0.92667514     |
| T_OTU1500 (Streptococcus)               | 0.234617772    | 0.739356806   | 0.280896356   | 0.156235101    | 0.272676333    | 0.205316798    | 0.258960252    | 0.804210736 | 0.107235311    |
| T_OTU1583 (Leptotrichia)                | 0.24135352     | 0.46728893    | 0.264575228   | 0.223199875    | 0.273802437    | 0.243934481    | 0.311809623    | 0.816076026 | 0.221882753    |
| T_OTU1612 (Leptotrichia)                | 0.050656547    | 0.065507986   | 0.06758221    | 0.027412355    | 0.039860451    | 0.081105199    | 0.162244559    | 0.007748184 | 0.007970869    |
| T_OTU1645 (Prevotella)                  | 0.013134882    | 2.14E-05      | 4.69E-04      | 0.007132359    | 6.05E-04       | 4.08E-04       | 0.028525768    | 8.44E-04    | 0.066326103    |
| T_OTU1801 (Fusobacterium)               | 1.49E-04       | 1.92E-05      | 5.52E-05      | 3.60E-05       | 7.85E-05       | 1.56E-04       | 4.51E-04       | 4.25E-06    | 2.96E-05       |
| T_OTU2079 (Neisseria)                   | 0.133404101    | 0.087217114   | 0.114028863   | 0.148009521    | 0.083501192    | 0.139876203    | 0.277165988    | 0.094338246 | 0.205537609    |
| T_OTU2136 (Streptococcus)               | 0.451026293    | 0.205334095   | 0.080442687   | 0.262142671    | 0.183908911    | 0.246270203    | 0.469206295    | 0.115689518 | 0.209016586    |
| T_OTU2149 (Campylobacter)               | 0.016772331    | 0.006591891   | 0.051327719   | 0.008344445    | 0.007182219    | 0.012718999    | 0.013304475    | 0.005517198 | 0.040774337    |
| T_OTU2186 (Haemophilus)                 | 0.004539389    | 5.72E-04      | 0.00441974    | 0.002373565    | 8.16E-04       | 0.001423192    | 0.001487036    | 8.08E-05    | 0.00143216     |
| T_OTU2280 (Veillonella)                 | 0.868969781    | 0.092338937   | 0.201452458   | 0.81984911     | 0.351561664    | 0.473239454    | 0.488972173    | 0.092761159 | 0.930215677    |
| T_OTU2428 (Lachnoanaerobaculum)         | 0.00843        | 0.015726813   | 0.035469288   | 0.008914986    | 0.015911834    | 0.01682603     | 0.067258282    | 0.003960004 | 0.001924566    |
| T_OTU2429 (Actinobacteria_unclassified) | 0.005058023    | 5.19E-04      | 0.002748438   | 0.001799932    | 3.86E-04       | 0.001214955    | 0.004249271    | 0.016159585 | 0.029465012    |
| T_OTU2580 (Actinomyces)                 | 0.004420468    | 0.002333531   | 0.004157912   | 0.00200753     | 5.61E-04       | 0.002389847    | 0.007200994    | 0.029959348 | 0.01291511     |
| T_OTU2613 (Actinomyces)                 | 0.003852148    | 9.65E-04      | 0.001121648   | 0.003037308    | 4.51E-04       | 0.002239036    | 0.005855361    | 5.44E-05    | 0.021235292    |
| T_OTU2672 (Veillonella)                 | 0.800987225    | 0.202303494   | 0.200227667   | 0.995411483    | 0.6617733      | 0.647014052    | 0.572095251    | 0.794926158 | 0.541412606    |
| T_OTU2889 (Streptococcus)               | 0.110748478    | 0.445647113   | 0.147195333   | 0.036153963    | 0.102521321    | 0.08267404     | 0.114327451    | 0.129326724 | 0.011826796    |
| T_OTU3021 (Prevotella)                  | 0.579612938    | 0.01979699    | 0.270846386   | 0.429237715    | 0.230987088    | 0.363302296    | 0.260675001    | 0.072369379 | 0.491612787    |

|                                                                                                                                                |             |             |             |             |             |             |             |             |             |             |
|------------------------------------------------------------------------------------------------------------------------------------------------|-------------|-------------|-------------|-------------|-------------|-------------|-------------|-------------|-------------|-------------|
| TG.24.4.16.0.1 F_OTU315..Sn F_OTU624..Hc F_OTU920..Rc F_OTU953..Sn T_OTU110..Nc T_OTU153..Nc T_OTU181..Gr T_OTU1343../T_OTU1412..FT_OTU1500..S |             |             |             |             |             |             |             |             |             |             |
| 1.38E-14                                                                                                                                       | 1.88E-04    | 7.13E-07    | 2.10E-06    | 7.30E-06    | 0.207382435 | 0.585701259 | 0.192333123 | 0.001089218 | 0.982430481 | 0.234617772 |
| 0                                                                                                                                              | 0.001223979 | 1.47E-06    | 4.44E-07    | 9.16E-05    | 0.143501282 | 0.473514343 | 0.043304955 | 9.67E-05    | 0.844917572 | 0.739356806 |
| 2.22E-16                                                                                                                                       | 0.003457685 | 3.84E-06    | 7.86E-06    | 2.45E-04    | 0.113548911 | 0.654253153 | 0.165316127 | 2.17E-04    | 0.552620903 | 0.280896356 |
| 1.11E-15                                                                                                                                       | 3.61E-04    | 1.79E-06    | 3.17E-06    | 2.49E-05    | 0.187815403 | 0.500736565 | 0.163196898 | 0.001016392 | 0.960103461 | 0.156235101 |
| 0                                                                                                                                              | 5.11E-04    | 9.20E-07    | 6.61E-07    | 3.39E-05    | 0.160120428 | 0.615272772 | 0.167455403 | 1.25E-04    | 0.738816262 | 0.272676333 |
| 0                                                                                                                                              | 9.49E-04    | 8.56E-07    | 1.27E-06    | 1.48E-04    | 0.133438302 | 0.499551192 | 0.216349882 | 2.72E-04    | 0.915325951 | 0.205316798 |
| 1.64E-14                                                                                                                                       | 1.86E-04    | 2.44E-05    | 1.13E-07    | 6.79E-05    | 0.0940696   | 0.46810103  | 0.422026955 | 0.001385375 | 0.85452309  | 0.258960252 |
| 1.46E-05                                                                                                                                       | 2.33E-04    | 1.55E-05    | 1.12E-04    | 2.29E-05    | 0.572062907 | 0.689671212 | 0.026467487 | 0.003671437 | 0.961730651 | 0.804210736 |
| 1.46E-12                                                                                                                                       | 1.18E-04    | 1.08E-05    | 1.70E-05    | 3.55E-04    | 0.117816296 | 0.68752255  | 0.275142889 | 0.020362281 | 0.92667514  | 0.107235311 |
| NA                                                                                                                                             | 0.001439689 | 4.73E-06    | 6.13E-07    | 1.95E-04    | 0.041570205 | 0.787214005 | 0.048039571 | 0.001787952 | 0.403341511 | 0.970387519 |
| 0.001439689                                                                                                                                    | NA          | 4.85E-06    | 7.73E-13    | 2.22E-15    | 0.631552572 | 0.8204958   | 0.1161302   | 0.471501782 | 0.863394728 | 0.647442112 |
| 4.73E-06                                                                                                                                       | 4.85E-06    | NA          | 9.04E-08    | 1.32E-07    | 0.847047297 | 0.589814096 | 0.009018264 | 0.080413046 | 0.270173525 | 0.674909383 |
| 6.13E-07                                                                                                                                       | 7.73E-13    | 9.04E-08    | NA          | 2.94E-12    | 0.3045649   | 0.429459787 | 0.070603886 | 0.048032635 | 0.782027896 | 0.681594197 |
| 1.95E-04                                                                                                                                       | 2.22E-15    | 1.32E-07    | 2.94E-12    | NA          | 0.472112033 | 0.863922907 | 0.121437668 | 0.045722699 | 0.802993506 | 0.762306421 |
| 0.041570205                                                                                                                                    | 0.631552572 | 0.847047297 | 0.3045649   | 0.472112033 | NA          | 0.176462664 | 0.275840645 | 0.181164187 | 0.119167177 | 0.527144629 |
| 0.787214005                                                                                                                                    | 0.8204958   | 0.589814096 | 0.429459787 | 0.863922907 | 0.176462664 | NA          | 0.725265119 | 0.888321913 | 0.066305881 | 0.707429731 |
| 0.048039571                                                                                                                                    | 0.1161302   | 0.009018264 | 0.070603886 | 0.121437668 | 0.275840645 | 0.725265119 | NA          | 0.799171039 | 0.891988028 | 4.71E-06    |
| 0.001787952                                                                                                                                    | 0.471501782 | 0.080413046 | 0.048032635 | 0.045722699 | 0.181164187 | 0.888321913 | 0.799171039 | NA          | 0.39488363  | 0.228739625 |
| 0.403341511                                                                                                                                    | 0.863394728 | 0.270173525 | 0.782027896 | 0.802993506 | 0.119167177 | 0.066305881 | 0.891988028 | 0.39488363  | NA          | 0.566314821 |
| 0.970387519                                                                                                                                    | 0.647442112 | 0.674909383 | 0.681594197 | 0.762306421 | 0.527144629 | 0.707429731 | 4.71E-06    | 0.228739625 | 0.566314821 | NA          |
| 0.718545279                                                                                                                                    | 0.672743321 | 0.78713104  | 0.868086781 | 0.723837478 | 0.228165886 | 0.180136933 | 0.158566518 | 0.756851712 | 0.740431732 | 0.041866109 |
| 0.005689638                                                                                                                                    | 0.105812109 | 0.003986316 | 0.262165639 | 0.095765659 | 0.023037189 | 0.052229988 | 0.103749919 | 0.042634402 | 0.364244902 | 0.968090137 |
| 4.86E-05                                                                                                                                       | 0.3061254   | 0.01720372  | 0.045995615 | 0.281755984 | 0.220200933 | 0.676650378 | 0.013769602 | 0.140579107 | 0.74812961  | 0.349806531 |
| 7.26E-06                                                                                                                                       | 0.034686234 | 6.71E-04    | 0.003654009 | 0.005943397 | 0.040620895 | 0.054864064 | 0.016375384 | 0.002770357 | 0.08918924  | 0.63038726  |
| 0.034659661                                                                                                                                    | 0.098810412 | 0.415027291 | 0.106971481 | 0.064629945 | 0.025038618 | 2.96E-05    | 0.06144562  | 0.997702997 | 0.065170713 | 0.756971538 |
| 0.072079964                                                                                                                                    | 0.450320342 | 0.630691046 | 0.594704303 | 0.51954456  | 0.371700969 | 0.274792871 | 0.169772715 | 0.142740553 | 0.08999301  | 0.149251712 |
| 0.035349191                                                                                                                                    | 0.080134947 | 0.097468641 | 0.002672624 | 0.011962303 | 0.647109712 | 0.171900746 | 0.023663572 | 0.023245027 | 0.258404435 | 0.881281397 |
| 3.63E-05                                                                                                                                       | 5.52E-05    | 0.003303389 | 1.46E-04    | 5.23E-04    | 0.024681755 | 0.49974292  | 0.011511546 | 0.026711343 | 0.969282959 | 0.089508127 |
| 0.355405942                                                                                                                                    | 0.242414561 | 0.233280747 | 0.666843729 | 0.571122361 | 0.767784655 | 0.226597245 | 0.501451127 | 0.911656109 | 0.467635795 | 0.679335852 |
| 0.005617053                                                                                                                                    | 0.277907198 | 0.00954973  | 0.091629899 | 0.134049494 | 0.009002458 | 0.265535808 | 0.057125245 | 0.043412745 | 0.311218015 | 0.975182706 |
| 0.002849697                                                                                                                                    | 0.743659603 | 0.117706596 | 0.204594614 | 0.084675792 | 0.33157583  | 0.849945554 | 0.637376458 | 0           | 0.458836992 | 0.084505299 |
| 0.003722575                                                                                                                                    | 0.382707754 | 0.120389641 | 0.05802106  | 0.148466526 | 0.057095359 | 0.661930563 | 0.868894019 | 4.22E-11    | 0.893723733 | 0.056904632 |
| 8.66E-04                                                                                                                                       | 0.153028744 | 0.060507998 | 0.014926999 | 0.007646725 | 0.205947229 | 0.365399287 | 0.821473372 | 1.68E-12    | 0.470604746 | 0.359388349 |
| 0.863826726                                                                                                                                    | 0.732037305 | 0.437753418 | 0.436896639 | 0.883052169 | 0.121435245 | 0.448476675 | 0.184251727 | 0.947842751 | 0.472331417 | 0.046925243 |
| 0.184105435                                                                                                                                    | 0.971029661 | 0.795194612 | 0.956549873 | 0.879534198 | 0.841942043 | 0.472948126 | 8.19E-04    | 0.168034508 | 0.385786625 | 1.28E-05    |
| 0.038753851                                                                                                                                    | 0.290672874 | 0.976017085 | 0.069649141 | 0.400170946 | 0.386169892 | 0.661747125 | 0.013143334 | 0.229385613 | 0.965567394 | 0.174326673 |

|              |              |              |              |              |              |              |              |              |              |              |
|--------------|--------------|--------------|--------------|--------------|--------------|--------------|--------------|--------------|--------------|--------------|
| T_OTU1583..I | T_OTU1612..I | T_OTU1645..F | T_OTU1801..F | T_OTU2079..N | T_OTU2136..S | T_OTU2149..C | T_OTU2186..F | T_OTU2280..N | T_OTU2428..I | T_OTU2429..A |
| 0.24135352   | 0.050656547  | 0.013134882  | 1.49E-04     | 0.133404101  | 0.451026293  | 0.016772331  | 0.004539389  | 0.868969781  | 0.00843      | 0.005058023  |
| 0.46728893   | 0.065507986  | 2.14E-05     | 1.92E-05     | 0.087217114  | 0.205334095  | 0.006591891  | 5.72E-04     | 0.092338937  | 0.015726813  | 5.19E-04     |
| 0.264575228  | 0.06758221   | 4.69E-04     | 5.52E-05     | 0.114028863  | 0.080442687  | 0.051327719  | 0.00441974   | 0.201452458  | 0.035469288  | 0.002748438  |
| 0.223199875  | 0.027412355  | 0.007132359  | 3.60E-05     | 0.148009521  | 0.262142671  | 0.008344445  | 0.002373565  | 0.81984911   | 0.008914986  | 0.001799932  |
| 0.273802437  | 0.039860451  | 6.05E-04     | 7.85E-05     | 0.083501192  | 0.183908911  | 0.007182219  | 8.16E-04     | 0.351561664  | 0.015911834  | 3.86E-04     |
| 0.243934481  | 0.081105199  | 4.08E-04     | 1.56E-04     | 0.139876203  | 0.246270203  | 0.012718999  | 0.001423192  | 0.473239454  | 0.01682603   | 0.001214955  |
| 0.311809623  | 0.162244559  | 0.028525768  | 4.51E-04     | 0.277165988  | 0.469206295  | 0.013304475  | 0.001487036  | 0.488972173  | 0.067258282  | 0.004249271  |
| 0.816076026  | 0.007748184  | 8.44E-04     | 4.25E-06     | 0.094338246  | 0.115689518  | 0.005517198  | 8.08E-05     | 0.092761159  | 0.003960004  | 0.016159585  |
| 0.221882753  | 0.007970869  | 0.066326103  | 2.96E-05     | 0.205537609  | 0.209016586  | 0.040774337  | 0.00143216   | 0.930215677  | 0.001924566  | 0.029465012  |
| 0.718545279  | 0.005689638  | 4.86E-05     | 7.26E-06     | 0.034659661  | 0.072079964  | 0.035349191  | 3.63E-05     | 0.355405942  | 0.005617053  | 0.002849697  |
| 0.672743321  | 0.105812109  | 0.3061254    | 0.034686234  | 0.098810412  | 0.450320342  | 0.080134947  | 5.52E-05     | 0.242414561  | 0.277907198  | 0.743659603  |
| 0.78713104   | 0.003986316  | 0.01720372   | 6.71E-04     | 0.415027291  | 0.630691046  | 0.097468641  | 0.003303389  | 0.233280747  | 0.00954973   | 0.117706596  |
| 0.868086781  | 0.262165639  | 0.045995615  | 0.003654009  | 0.106971481  | 0.594704303  | 0.002672624  | 1.46E-04     | 0.666843729  | 0.091629899  | 0.204594614  |
| 0.723837478  | 0.095765659  | 0.281755984  | 0.005943397  | 0.064629945  | 0.51954456   | 0.011962303  | 5.23E-04     | 0.571122361  | 0.134049494  | 0.084675792  |
| 0.228165886  | 0.023037189  | 0.220200933  | 0.040620895  | 0.025038618  | 0.371700969  | 0.647109712  | 0.024681755  | 0.767784655  | 0.009002458  | 0.33157583   |
| 0.180136933  | 0.052229988  | 0.676650378  | 0.054864064  | 2.96E-05     | 0.274792871  | 0.171900746  | 0.49974292   | 0.226597245  | 0.265535808  | 0.849945554  |
| 0.158566518  | 0.103749919  | 0.013769602  | 0.016375384  | 0.06144562   | 0.169772715  | 0.023663572  | 0.011511546  | 0.501451127  | 0.057125245  | 0.637376458  |
| 0.756851712  | 0.042634402  | 0.140579107  | 0.002770357  | 0.997702997  | 0.142740553  | 0.023245027  | 0.026711343  | 0.911656109  | 0.043412745  | 0            |
| 0.740431732  | 0.364244902  | 0.74812961   | 0.08918924   | 0.065170713  | 0.08999301   | 0.258404435  | 0.969282959  | 0.467635795  | 0.311218015  | 0.458836992  |
| 0.041866109  | 0.968090137  | 0.349806531  | 0.63038726   | 0.756971538  | 0.149251712  | 0.881281397  | 0.089508127  | 0.679335852  | 0.975182706  | 0.084505299  |
| NA           | 0.686907254  | NA           | 0.185351614  | 9.31E-09     | 0.357370169  | 0.261022768  | 0.768083486  | 5.93E-04     | 0.062637835  | 6.11E-04     |
| 0.686907254  | NA           | 0.185351614  | NA           | 8.94E-04     | 0.010861406  | 0.163225385  | 0.089192502  | 0.013777084  | 6.19E-04     | 0.005855959  |
| 0.294786174  | 0.185351614  | NA           | 8.94E-04     | NA           | 0.005988128  | 0.101674678  | 0.053740796  | 5.84E-04     | 0.002962481  | 7.89E-06     |
| 0.285715251  | 9.31E-09     | 8.94E-04     | NA           | 0.005988128  | NA           | 0.64670885   | 0.754083931  | 0.368888566  | 0.090553293  | 0.028906115  |
| 0.201127918  | 0.357370169  | 0.010861406  | 0.005988128  | NA           | 0.64670885   | NA           | 0.368361914  | 0.75641429   | 0.5707938    | 0.524539566  |
| 0.292811307  | 0.261022768  | 0.163225385  | 0.101674678  | 0.64670885   | NA           | 0.368361914  | NA           | 0.032524052  | 0.760321107  | 0.117387995  |
| 0.801258649  | 0.768083486  | 0.089192502  | 0.053740796  | 0.754083931  | 0.368361914  | NA           | 0.032524052  | NA           | 0.309388419  | 0.03547813   |
| 0.324733254  | 5.93E-04     | 0.013777084  | 5.84E-04     | 0.368888566  | 0.75641429   | 0.032524052  | NA           | 0.309388419  | NA           | 0.269477247  |
| 0.058850793  | 0.062637835  | 6.19E-04     | 0.002962481  | 0.090553293  | 0.5707938    | 0.760321107  | 0.309388419  | NA           | 0.269477247  | 0.605914755  |
| 0.288108446  | 6.11E-04     | 0.015761874  | 7.89E-06     | 0.028906115  | 0.524539566  | 0.117387995  | 0.03547813   | 0.269477247  | NA           | 0.098768811  |
| 0.891036108  | 0.005855959  | 0.106762792  | 0.002804025  | 0.948659859  | 0.088926459  | 0.071140932  | 0.054817075  | 0.605914755  | 0.098768811  | NA           |
| 0.682552198  | 3.81E-04     | 0.120429669  | 5.00E-04     | 0.763469823  | 0.295537588  | 0.198076334  | 0.007775016  | 0.868898707  | 0.027585434  | 4.00E-14     |
| 0.899044542  | 0.004143033  | 0.194497668  | 4.10E-04     | 0.364263115  | 0.027506428  | 0.618624565  | 0.008221364  | 0.95934667   | 0.034652798  | 6.66E-10     |
| 0.519284081  | 0.575796626  | 0.950702859  | 0.974967451  | 0.848609898  | 0.924007355  | 0.273073897  | 0.801970543  | 0.020286788  | 0.546827361  | 0.941559376  |
| 0.395363933  | 0.380034219  | 0.116334099  | 0.098087421  | 0.255280885  | 3.59E-07     | 0.551440736  | 0.643640073  | 0.205082478  | 0.502668642  | 0.110088304  |
| 0.532666174  | 0.50515706   | 0.012296222  | 0.025388472  | 0.168462191  | 0.088217901  | 0.232793546  | 0.075062085  | 0.12928523   | 0.539326369  | 0.239192533  |

T\_OTU2580..T\_OTU2613..T\_OTU2672..T\_OTU2889..ST\_OTU3021..Prevotella.

|             |             |             |             |             |
|-------------|-------------|-------------|-------------|-------------|
| 0.004420468 | 0.003852148 | 0.800987225 | 0.110748478 | 0.579612938 |
| 0.002333531 | 9.65E-04    | 0.202303494 | 0.445647113 | 0.01979699  |
| 0.004157912 | 0.001121648 | 0.200227667 | 0.147195333 | 0.270846386 |
| 0.00200753  | 0.003037308 | 0.995411483 | 0.036153963 | 0.429237715 |
| 5.61E-04    | 4.51E-04    | 0.6617733   | 0.102521321 | 0.230987088 |
| 0.002389847 | 0.002239036 | 0.647014052 | 0.08267404  | 0.363302296 |
| 0.007200994 | 0.005855361 | 0.572095251 | 0.114327451 | 0.260675001 |
| 0.029959348 | 5.44E-05    | 0.794926158 | 0.129326724 | 0.072369379 |
| 0.01291511  | 0.021235292 | 0.541412606 | 0.011826796 | 0.491612787 |
| 0.003722575 | 8.66E-04    | 0.863826726 | 0.184105435 | 0.038753851 |
| 0.382707754 | 0.153028744 | 0.732037305 | 0.971029661 | 0.290672874 |
| 0.120389641 | 0.060507998 | 0.437753418 | 0.795194612 | 0.976017085 |
| 0.05802106  | 0.014926999 | 0.436896639 | 0.956549873 | 0.069649141 |
| 0.148466526 | 0.007646725 | 0.883052169 | 0.879534198 | 0.400170946 |
| 0.057095359 | 0.205947229 | 0.121435245 | 0.841942043 | 0.386169892 |
| 0.661930563 | 0.365399287 | 0.448476675 | 0.472948126 | 0.661747125 |
| 0.868894019 | 0.821473372 | 0.184251727 | 8.19E-04    | 0.013143334 |
| 4.22E-11    | 1.68E-12    | 0.947842751 | 0.168034508 | 0.229385613 |
| 0.893723733 | 0.470604746 | 0.472331417 | 0.385786625 | 0.965567394 |
| 0.056904632 | 0.359388349 | 0.046925243 | 1.28E-05    | 0.174326673 |
| 0.682552198 | 0.899044542 | 0.519284081 | 0.395363933 | 0.532666174 |
| 3.81E-04    | 0.004143033 | 0.575796626 | 0.380034219 | 0.50515706  |
| 0.120429669 | 0.194497668 | 0.950702859 | 0.116334099 | 0.012296222 |
| 5.00E-04    | 4.10E-04    | 0.974967451 | 0.098087421 | 0.025388472 |
| 0.763469823 | 0.364263115 | 0.848609898 | 0.255280885 | 0.168462191 |
| 0.295537588 | 0.027506428 | 0.924007355 | 3.59E-07    | 0.088217901 |
| 0.198076334 | 0.618624565 | 0.273073897 | 0.551440736 | 0.232793546 |
| 0.007775016 | 0.008221364 | 0.801970543 | 0.643640073 | 0.075062085 |
| 0.868898707 | 0.95934667  | 0.020286788 | 0.205082478 | 0.12928523  |
| 0.027585434 | 0.034652798 | 0.546827361 | 0.502668642 | 0.539326369 |
| 4.00E-14    | 6.66E-10    | 0.941559376 | 0.110088304 | 0.239192533 |
| NA          | 1.52E-09    | 0.794093316 | 0.248904014 | 0.045326994 |
| 1.52E-09    | NA          | 0.160078506 | 0.147505287 | 0.024123967 |
| 0.794093316 | 0.160078506 | NA          | 0.24994406  | 0.960804859 |
| 0.248904014 | 0.147505287 | 0.24994406  | NA          | 0.726481216 |
| 0.045326994 | 0.024123967 | 0.960804859 | 0.726481216 | NA          |

Table S41. the p value between oral OTUs and clinical indicators of CP (n=48) and HC (n=100) obtained by spearman correlation analysis

| p.value                                | WBC         | NEUT        | LYMPH       | PLT         | ALT         | AST         | CREA        |
|----------------------------------------|-------------|-------------|-------------|-------------|-------------|-------------|-------------|
| OTU4                                   |             |             |             |             |             |             |             |
| (Candidate_division_SR1_norank)        | 0.002150997 | 0.410956652 | 0.001432779 | 0.00341326  | 0.68578396  | 0.276300177 | 0.70778885  |
| OTU12 (Neisseria)                      | 0.363231196 | 0.934635773 | 0.003747296 | 0.724371217 | 0.837262168 | 0.204400006 | 0.477062195 |
| OTU57 (Leptotrichia)                   | 0.586424073 | 0.371612223 | 0.32459085  | 0.264594646 | 0.08133378  | 0.427875375 | 0.612403401 |
| OTU87 (Neisseria)                      | 0.041626966 | 0.816268104 | 0.012156353 | 0.884922865 | 0.665460232 | 0.594409335 | 0.843881872 |
| OTU186 (Leptotrichia)                  | 0.001427554 | 0.059801479 | 0.12005692  | 0.017034491 | 0.662282246 | 0.544980389 | 0.276301088 |
| OTU257 (Family_XIII_uncultured)        | 0.706481176 | 0.156159942 | 0.02097778  | 0.010225321 | 0.968838401 | 0.862389823 | 0.954006138 |
| OTU342 (Tannerella)                    | 0.048989142 | 0.799091611 | 0.011120302 | 0.002644075 | 0.925545053 | 0.681403627 | 0.827841152 |
| OTU379 (Streptococcus)                 | 0.566803296 | 0.427174313 | 0.208029527 | 0.795221186 | 0.203725467 | 0.029871712 | 0.974835287 |
| OTU390 (Megasphaera)                   | 0.011253894 | 0.756863181 | 0.003604558 | 0.757089439 | 0.668041296 | 0.141471112 | 0.777766947 |
| OTU567 (Rothia)                        | 0.320377113 | 0.678992044 | 0.002693409 | 0.389612461 | 0.815854757 | 0.041732979 | 0.602409246 |
| OTU575 (Fusobacterium)                 | 4.00E-04    | 0.513327065 | 3.01E-04    | 2.70E-04    | 0.425307422 | 0.679428714 | 0.844991178 |
| OTU607 (Actinomyces)                   | 0.33628954  | 0.007677522 | 0.732204637 | 0.474843734 | 0.031727971 | 0.006829518 | 0.290619035 |
| OTU648 (Oribacterium)                  | 0.344238661 | 0.163921151 | 0.026875358 | 0.023699795 | 0.816534761 | 0.059595843 | 0.540122767 |
| OTU681 (Stomatobaculum)                | 0.402842079 | 0.888523633 | 0.511738567 | 0.342427125 | 0.274883547 | 0.044790136 | 0.374383847 |
| OTU688 (Streptococcus)                 | 0.555037704 | 0.104398794 | 0.21142247  | 0.135135704 | 0.125085607 | 0.002721376 | 0.541424502 |
| OTU839 (Lactobacillus)                 | 0.422458303 | 0.448077267 | 0.104810177 | 0.329447104 | 0.630869564 | 0.80482501  | 0.008258079 |
| OTU876 (Parvimonas)                    | 0.007343187 | 0.58628731  | 0.025302271 | 0.00433924  | 0.635323957 | 0.088750819 | 0.941199559 |
| OTU958 (Porphyromonas)                 | 0.001706489 | 0.414927309 | 9.22E-04    | 5.85E-04    | 0.636661413 | 0.290111616 | 0.888911147 |
| OTU984 (Gemella)                       | 0.286102935 | 0.603824603 | 0.190530814 | 0.041117664 | 0.522838703 | 0.048811668 | 0.653721948 |
| OTU1001 (Rothia)                       | 0.851416847 | 0.07636653  | 0.129870777 | 0.955874153 | 0.612406518 | 0.015132599 | 0.162800415 |
| OTU1035 (Selenomonas)                  | 0.14441076  | 0.68918499  | 0.794963716 | 0.348487798 | 0.444380013 | 0.386406572 | 0.818115937 |
| OTU1052 (Gemella)                      | 0.172172217 | 0.676520365 | 0.060003395 | 0.090031373 | 0.377101931 | 0.059085015 | 0.546672686 |
| OTU1076 (Prevotella)                   | 0.050087843 | 0.439066444 | 0.01012683  | 0.029043476 | 0.411148217 | 0.398637247 | 0.855330506 |
| OTU1082 (Solobacterium)                | 0.232481022 | 0.18957788  | 0.016395199 | 0.033297712 | 0.301468704 | 0.05460496  | 0.612048263 |
| OTU1086                                | 0.006269578 | 0.925684317 | 7.69E-04    | 6.71E-04    | 0.19429683  | 0.062266567 | 0.648897375 |
| OTU1089                                |             |             |             |             |             |             |             |
| (Peptostreptococcaceae_Incertae_Sedis) | 0.194338324 | 0.336130162 | 0.031531197 | 0.041981736 | 0.161554014 | 0.103654959 | 0.850882302 |
| OTU1135 (Veillonella)                  | 0.0231829   | 0.832091372 | 0.013147293 | 0.421286146 | 0.428791005 | 0.817436748 | 0.889148317 |
| OTU1144 (Leptotrichia)                 | 0.003830835 | 0.420785322 | 0.009218529 | 0.027496181 | 0.741370124 | 0.698249103 | 0.906251783 |
| OTU1277 (Actinomyces)                  | 0.465442876 | 0.001971939 | 0.700450885 | 0.438178288 | 0.062602594 | 2.96E-04    | 0.510770039 |
| OTU1305 (Bacteria_unclassified)        | 3.12E-04    | 0.013633107 | 0.037069865 | 0.034372579 | 0.247661034 | 0.152154215 | 0.584438599 |
| OTU1340 (Porphyromonas)                | 7.24E-04    | 0.064296243 | 0.00389687  | 0.008272016 | 0.297570998 | 0.270516257 | 0.976485756 |
| OTU1349 (Porphyromonas)                | 7.32E-04    | 0.09083229  | 0.001154372 | 0.026040527 | 0.577251415 | 0.339793338 | 0.503682529 |
| OTU1411 (Neisseria)                    | 0.061590222 | 0.568571955 | 0.348882458 | 0.277914692 | 0.863701301 | 0.389655882 | 0.799943478 |
| OTU1417 (Actinomyces)                  | 0.444873218 | 1.75E-04    | 0.669635096 | 0.293216391 | 0.101444708 | 0.001878337 | 0.278389137 |
| OTU1428 (Neisseria)                    | 0.686246327 | 0.744015017 | 0.030605571 | 0.371511189 | 0.458970431 | 0.918718036 | 0.891638433 |
| OTU1451 (Citrobacter)                  | 0.779780525 | 0.062968273 | 0.065181605 | 0.048757112 | 0.110910256 | 0.697647466 | 0.049102299 |
| OTU1454 (Fusobacterium)                | 9.35E-04    | 0.734690617 | 0.006142635 | 1.76E-05    | 0.96020331  | 0.026857917 | 0.796094735 |
| OTU1471 (Prevotella)                   | 0.820834135 | 0.178788836 | 0.932983101 | 0.286489752 | 0.537371989 | 0.18373488  | 0.066128762 |
| OTU1496 (Porphyromonas)                | 1.68E-04    | 0.049802715 | 0.001498485 | 0.01225674  | 0.717808746 | 0.686116812 | 0.671601448 |
| OTU1498                                |             |             |             |             |             |             |             |
| (Enterobacteriaceae_unclassified)      | 0.429068264 | 0.187928501 | 0.030981765 | 0.120571227 | 0.379783243 | 0.859235609 | 0.006968438 |
| OTU1540                                |             |             |             |             |             |             |             |
| (Pasteurellaceae_unclassified)         | 0.022026087 | 0.268970713 | 7.79E-04    | 0.774303224 | 0.346489387 | 0.715577626 | 0.293394943 |
| OTU1642 (Haemophilus)                  | 0.161887936 | 0.158104105 | 0.004883242 | 0.31264889  | 0.183646575 | 0.04201138  | 0.290257459 |
| OTU1662 (Campylobacter)                | 0.011638138 | 0.619894241 | 0.089867062 | 0.087079472 | 0.32212713  | 0.133361279 | 0.380886872 |
| OTU1673 (Megasphaera)                  | 0.069027369 | 0.445413851 | 0.001516068 | 0.961503954 | 0.831237061 | 0.275871754 | 0.769625152 |
| OTU1674 (Bacteria_unclassified)        | 9.25E-04    | 0.077871921 | 1.57E-04    | 0.081313518 | 0.323653233 | 0.730462412 | 0.715653281 |
| OTU1711 (Prevotella)                   | 0.448585033 | 0.514019436 | 0.721757903 | 0.01833714  | 0.647445706 | 0.305879502 | 0.221111966 |
| OTU1715 (Stomatobaculum)               | 0.129168823 | 0.791347051 | 0.205728966 | 0.318371677 | 0.396309343 | 0.047567675 | 0.417399479 |
| OTU1721                                |             |             |             |             |             |             |             |
| (Candidate_division_TM7_norank)        | 0.017457886 | 0.467780497 | 0.001071474 | 4.15E-04    | 0.948906507 | 0.03731051  | 0.468745079 |
| OTU1815 (Granulicatella)               | 0.97553948  | 0.058422805 | 0.443103724 | 0.819442727 | 0.352052457 | 0.057532905 | 0.574516909 |
| OTU1868 (Prevotella)                   | 0.010731939 | 0.535539302 | 0.011566809 | 0.001044387 | 0.525473621 | 0.176931544 | 0.390108872 |
| OTU1891 (Neisseria)                    | 0.056007502 | 0.359293458 | 2.29E-04    | 0.835690183 | 0.503696546 | 0.680068508 | 0.10080852  |
| OTU1897 (Neisseria)                    | 0.744352206 | 0.712506208 | 0.016110956 | 0.381149278 | 0.781604845 | 0.017928501 | 0.983513186 |
| OTU1949 (Rothia)                       | 0.1728334   | 0.672672962 | 0.788962848 | 0.696340607 | 0.250409574 | 3.78E-04    | 0.555859    |
| OTU1962                                |             |             |             |             |             |             |             |
| (Candidate_division_TM7_norank)        | 0.165202436 | 0.397258559 | 0.216964802 | 0.00176414  | 0.691568052 | 0.015740757 | 0.255949255 |
| OTU1981 (Prevotella)                   | 0.740141473 | 0.531443611 | 0.750602224 | 0.03512363  | 0.798512618 | 0.414875691 | 0.239826494 |
| OTU2001 (Haemophilus)                  | 0.736329824 | 0.301992717 | 0.283160504 | 0.298990218 | 0.751016417 | 0.857169205 | 0.474395623 |
| OTU2028 (Porphyromonas)                | 6.94E-04    | 0.13382064  | 0.001798446 | 0.022472841 | 0.814431339 | 0.580925817 | 0.344017673 |
| OTU2079 (Streptococcus)                | 0.347266232 | 0.37657523  | 0.60587588  | 0.339511585 | 0.145468447 | 5.18E-04    | 0.763040834 |
| OTU2126 (Prevotella)                   | 8.33E-04    | 0.074373574 | 0.018934747 | 0.040166177 | 0.812744401 | 0.135448902 | 0.120378023 |
| OTU2191 (Peptostreptococcus)           | 0.043350647 | 0.856100063 | 0.007834981 | 0.00119576  | 0.706218663 | 0.497910471 | 0.5931444   |
| OTU2247 (Neisseria)                    | 0.007078947 | 0.757747576 | 0.029807589 | 0.564412642 | 0.477960609 | 0.89962562  | 0.970712446 |
| OTU2268 (ASCC02_norank)                | 5.28E-05    | 0.256222411 | 0.010377911 | 2.57E-04    | 0.997219939 | 0.009517603 | 0.974591562 |
| OTU2284 (Porphyromonas)                | 2.91E-05    | 0.037454889 | 6.09E-04    | 0.004640135 | 0.464647665 | 0.294496543 | 0.647482517 |
| OTU2337 (Prevotella)                   | 0.006108005 | 0.524777064 | 0.013185291 | 0.01243808  | 0.816645512 | 0.050899783 | 0.129814032 |
| OTU2343 (Porphyromonas)                | 3.29E-04    | 0.072586059 | 1.94E-04    | 0.047806837 | 0.398134856 | 0.575677386 | 0.990671824 |
| OTU2479 (Actinobacteria_unclassified)  | 0.636632864 | 0.039167619 | 0.955084945 | 0.968987792 | 0.084664427 | 2.99E-04    | 0.464921225 |
| OTU2628 (Porphyromonas)                | 0.001825272 | 0.096426696 | 0.005721239 | 0.05599862  | 0.473825586 | 0.979086395 | 0.524158554 |
| OTU2662 (Actinomyces)                  | 0.226527138 | 0.004161828 | 0.414821371 | 0.851124032 | 0.012969405 | 0.002513644 | 0.274587824 |

Table S41. the p value between gut OTUs and clinical indicators of CP (n=24) and HC (n=48) obtained by spearman correlation analysis

| p.value                                  | WBC         | NEUT        | LYMPH       | PLT         | ALT         | AST         | CREA        |
|------------------------------------------|-------------|-------------|-------------|-------------|-------------|-------------|-------------|
| OTU10 (Bacteroides)                      | 0.060258314 | 0.598491339 | 0.011809952 | 0.122954154 | 0.934366279 | 0.375472382 | 0.629009825 |
| OTU13 (Alistipes)                        | 0.355995646 | 0.814917944 | 0.181811472 | 0.2758781   | 0.215554084 | 0.161888535 | 0.461748091 |
| OTU45 (Bacteroides)                      | 0.409154811 | 0.489968685 | 0.026360219 | 0.163724348 | 0.614229197 | 0.307342846 | 0.661498323 |
| OTU51 (Streptococcus)                    | 0.745972455 | 0.796734226 | 0.027318416 | 0.220817218 | 0.107280912 | 0.003195003 | 0.624815276 |
| OTU52 (Bacteroides)                      | 0.624851012 | 0.886072238 | 0.330200488 | 0.317605698 | 0.973615706 | 0.526302407 | 0.900867505 |
| OTU55 (Enterococcus)                     | 0.578493444 | 0.910911011 | 0.7727722   | 0.082347765 | 0.314536416 | 0.511912248 | 0.807920724 |
| OTU64 (Faecalibacterium)                 | 0.015451363 | 0.951971714 | 1.21E-05    | 0.001184386 | 0.498414878 | 0.037320726 | 0.733754502 |
| OTU74 (Streptococcus)                    | 0.328414217 | 0.266879117 | 0.606522808 | 0.036928374 | 0.345467796 | 0.980466874 | 0.523821576 |
| OTU84 (Bacteroides)                      | 0.647550417 | 0.562766948 | 0.166271309 | 0.86428356  | 0.443607794 | 0.630274525 | 0.995651552 |
| OTU89 (Pseudobutyrvibrio)                | 0.04965115  | 0.539352111 | 5.92E-04    | 0.033824553 | 0.019005203 | 0.099631384 | 0.755500842 |
| OTU124 (Bacteroides)                     | 0.565486643 | 0.813508108 | 0.049687336 | 0.238755371 | 0.938758042 | 0.771999162 | 0.728108064 |
| OTU133 (Lachnospiraceae_Incertae_Sedis)  | 0.669517156 | 0.180454035 | 0.135966257 | 0.087447348 | 0.728005705 | 0.24456778  | 0.503829146 |
| OTU134 (Enterobacteriaceae_unclassified) | 0.476083354 | 0.454977497 | 0.150117818 | 0.014506253 | 0.590511049 | 0.225630224 | 0.944612298 |
| OTU210 (Lachnospiraceae_Incertae_Sedis)  | 0.188390332 | 0.350015973 | 0.026356391 | 0.145764221 | 0.150356997 | 0.158977615 | 0.548881667 |
| OTU211 (Ruminococcaceae_uncultured)      | 0.163329217 | 0.71688278  | 0.061563108 | 0.216395915 | 0.973224217 | 0.265800245 | 0.025315314 |
| OTU231 (Haemophilus)                     | 0.737949399 | 0.536532131 | 0.023372576 | 0.189843638 | 0.960103698 | 0.521705621 | 0.994214159 |
| OTU239 (Lachnospiraceae_Incertae_Sedis)  | 0.016974744 | 0.780401586 | 0.001787562 | 5.90E-04    | 0.163919149 | 0.095509854 | 0.883563445 |
| OTU271 (Bacteroides)                     | 0.389768267 | 0.742302614 | 0.429723747 | 0.17744718  | 0.878103069 | 0.894185383 | 0.364403695 |
| OTU280 (Lachnospiraceae_unclassified)    | 0.078949304 | 0.459906624 | 0.042287254 | 0.014890915 | 0.410488108 | 0.352984933 | 0.160750848 |
| OTU284 (Ruminococcaceae_uncultured)      | 0.377520429 | 0.616635092 | 0.199199165 | 0.654517292 | 0.481646583 | 0.10073048  | 0.299515434 |
| OTU299 (Lachnospiraceae_Incertae_Sedis)  | 0.084020912 | 0.17685996  | 0.003495454 | 0.253838563 | 0.660491011 | 0.197554836 | 0.529788581 |
| OTU316 (Lachnospiraceae_Incertae_Sedis)  | 0.065848693 | 0.743914448 | 0.004891809 | 0.004296365 | 0.053246191 | 0.030688703 | 0.555831377 |
| OTU405 (Coprococcus)                     | 0.013334314 | 0.598883143 | 0.016531974 | 0.032482202 | 0.553645052 | 0.097751212 | 0.536383031 |
| OTU433 (Actinomyces)                     | 0.338138044 | 0.896109819 | 0.72946664  | 0.812382361 | 0.423595988 | 0.696791989 | 0.945835975 |
| OTU452 (Faecalibacterium)                | 0.074162063 | 0.353300828 | 8.52E-04    | 0.057429982 | 0.076426033 | 0.012089463 | 0.204566641 |
| OTU469 (Lachnospiraceae_Incertae_Sedis)  | 0.026836109 | 0.851738865 | 1.77E-04    | 0.002095986 | 0.148817732 | 0.026934967 | 0.148919682 |
| OTU470 (Blautia)                         | 0.058287941 | 0.257080854 | 0.013022823 | 0.012804448 | 0.224476779 | 0.021492294 | 0.870094363 |
| OTU500 (Bacteroides)                     | 0.450126302 | 0.565626615 | 0.025358289 | 0.403396448 | 0.905366567 | 0.894540674 | 0.930454871 |
| OTU502 (Lachnospiraceae_uncultured)      | 0.200524009 | 0.206274279 | 0.016727868 | 0.083079913 | 0.813849454 | 0.313056908 | 0.853644845 |
| OTU510 (Alistipes)                       | 0.411665627 | 0.625937728 | 0.493752782 | 0.555381659 | 0.562403531 | 0.634944235 | 0.538397007 |
| OTU534 (Roseburia)                       | 0.58101748  | 0.871515546 | 0.100441466 | 0.216785703 | 0.27905424  | 0.251204518 | 0.534877042 |
| OTU544 (Ruminococcus)                    | 0.351371827 | 0.626500398 | 0.587512815 | 0.004107974 | 0.406296045 | 0.686083437 | 0.754124834 |
| OTU586 (Christensenellaceae_uncultured)  | 0.004112816 | 0.332998711 | 0.005785149 | 0.004411458 | 0.9853112   | 0.321136033 | 0.547705345 |
| OTU613 (Klebsiella)                      | 0.478345693 | 0.569521675 | 0.298353296 | 0.055995474 | 0.564199223 | 0.306049912 | 0.859127901 |
| OTU622 (Lachnospira)                     | 0.00216069  | 0.636888055 | 8.88E-05    | 0.002614353 | 0.572679875 | 0.190708059 | 0.932877486 |
| OTU672 (Blautia)                         | 0.098176679 | 0.46392419  | 3.21E-04    | 0.126955156 | 0.029694488 | 0.007214001 | 0.784159541 |
| OTU685 (Erysipelotrichaceae_uncultured)  | 0.069993359 | 0.305274608 | 0.006810962 | 0.001520913 | 0.177592525 | 0.055026793 | 0.696296721 |
| OTU696 (Lachnospiraceae_unclassified)    | 0.060745515 | 0.346787072 | 0.002625336 | 0.158949437 | 0.66322725  | 0.269037024 | 0.69632857  |
| OTU717 (Ruminococcus)                    | 0.040872463 | 0.929292429 | 0.007367748 | 0.00785966  | 0.305321333 | 0.014088992 | 0.90312519  |
| OTU740 (Ruminococcus)                    | 8.87E-04    | 0.183960761 | 9.91E-04    | 0.00295335  | 0.093201028 | 0.023179392 | 0.404092573 |
| OTU754 (Dialister)                       | 5.55E-04    | 0.094171002 | 0.002190099 | 0.040293108 | 0.629611354 | 0.101253564 | 0.255801221 |
| OTU773 (Ruminococcaceae_uncultured)      | 0.092361421 | 0.537238708 | 0.093037734 | 0.150334751 | 0.232500729 | 0.017240772 | 0.592908221 |
| OTU785 (Granulicatella)                  | 0.195959417 | 0.629101691 | 0.028238987 | 0.353082865 | 0.283541242 | 0.167277518 | 0.120146243 |
| OTU787 (Lachnospiraceae_Incertae_Sedis)  | 0.003836937 | 0.366971374 | 0.010480726 | 0.109880126 | 0.486790841 | 0.058610052 | 0.875081887 |
| OTU803 (Ruminococcaceae_uncultured)      | 0.019563866 | 0.928970443 | 0.005873905 | 0.271471117 | 0.391937387 | 0.816788683 | 0.614006472 |
| OTU833 (Ruminococcus)                    | 0.167205458 | 0.416510178 | 0.114462721 | 0.025594614 | 0.309350553 | 0.291310388 | 0.592613777 |
| OTU844 (Rothia)                          | 0.253292593 | 0.284515606 | 7.25E-04    | 0.148894315 | 0.070462808 | 6.52E-04    | 0.546232829 |
| OTU871 (Ruminococcus)                    | 0.508326117 | 0.511077396 | 0.069068056 | 0.128334172 | 0.031659728 | 0.005494183 | 0.815978074 |
| OTU902 (Atopobium)                       | 0.919020438 | 0.745667293 | 0.218074169 | 0.502470633 | 0.556461346 | 0.050348413 | 0.181512095 |
| OTU938 (Dorea)                           | 0.014171578 | 0.9609048   | 0.003450207 | 0.044774477 | 0.488453635 | 0.361669444 | 0.349867528 |
| OTU948 (Solobacterium)                   | 0.672765932 | 0.269075045 | 0.21149077  | 0.00838839  | 0.199230543 | 0.055799612 | 0.968811339 |
| OTU950 (Bifidobacterium)                 | 0.025975752 | 0.314783933 | 7.64E-04    | 0.367257566 | 0.773554072 | 0.635551707 | 0.774237862 |
| OTU962 (Bacteroides)                     | 0.111327941 | 0.879175235 | 0.081258583 | 0.418599864 | 0.560160001 | 0.455974458 | 0.392429178 |
| OTU971 (Faecalibacterium)                | 0.122188517 | 0.30074505  | 0.001367117 | 0.060075291 | 0.017617451 | 0.003465393 | 0.169809013 |
| OTU1000 (Blautia)                        | 0.09083303  | 0.278375481 | 0.0086739   | 0.031574457 | 0.153870263 | 0.015206447 | 0.918749267 |
| OTU1007 (Blautia)                        | 0.224608898 | 0.73921231  | 0.06801687  | 0.04660674  | 0.448641288 | 0.313606416 | 0.172015904 |

|                                                |             |             |             |             |             |             |             |
|------------------------------------------------|-------------|-------------|-------------|-------------|-------------|-------------|-------------|
| OTU1029 (Bifidobacterium)                      | 0.02276659  | 0.798722474 | 0.002417802 | 0.050755379 | 0.271617271 | 0.885337085 | 0.59583325  |
| OTU1035 (Blautia)                              | 0.081707223 | 0.796539715 | 0.902967503 | 0.131329234 | 0.408508347 | 0.780098795 | 0.341288191 |
| OTU1048 (Ruminococcaceae_uncultured)           | 0.099354776 | 0.353535866 | 0.086644297 | 0.101434429 | 0.565780121 | 0.23723448  | 0.087333116 |
| OTU1065 (Bacteroides)                          | 0.0716951   | 0.75285715  | 0.02502646  | 0.034513168 | 0.32383382  | 0.148546592 | 0.98602599  |
| OTU1088 (Lachnospiraceae_unclassified)         | 0.551292609 | 0.676040421 | 0.05275418  | 0.008889668 | 0.121778458 | 0.082041216 | 0.877255418 |
| OTU1095 (Bacteroides)                          | 0.638783003 | 0.569559566 | 0.08038697  | 0.477640474 | 0.361524466 | 0.440375443 | 0.688333872 |
| OTU1100 (Subdoligranulum)                      | 0.717597258 | 0.427387543 | 0.751793911 | 0.083126008 | 0.080758603 | 0.041336922 | 0.831761654 |
| OTU1112 (Bacteroides)                          | 0.48855175  | 0.376085194 | 0.32881841  | 0.491599317 | 0.420386663 | 0.418628143 | 0.975530605 |
| OTU1126 (Ruminococcaceae_unclassified)         | 0.133704592 | 0.383428476 | 7.58E-04    | 0.086350176 | 0.062058852 | 0.020603472 | 0.254313119 |
| OTU1145 (Lachnospira)                          | 5.23E-04    | 0.919261426 | 3.26E-06    | 0.00280762  | 0.411236738 | 0.023636319 | 0.665302301 |
| OTU1150 (Veillonella)                          | 0.829889316 | 0.982497161 | 0.575261598 | 0.320024838 | 0.803582039 | 0.224855741 | 0.808960448 |
| OTU1153 (Roseburia)                            | 0.065428023 | 0.666595167 | 2.28E-05    | 0.035741221 | 0.032092905 | 0.025935234 | 0.855960553 |
| OTU1167 (Anaerostipes)                         | 0.292024257 | 0.366415699 | 0.006872165 | 0.011181908 | 0.704863799 | 0.61072886  | 0.285206224 |
| OTU1168 (Peptostreptococcaceae_Incertae_Sedis) | 0.002226349 | 0.770633539 | 7.01E-05    | 0.033906654 | 0.750922065 | 0.119509486 | 0.999884045 |
| OTU1187 (Blautia)                              | 0.510810654 | 0.788476915 | 0.825259053 | 0.819653516 | 0.37806759  | 0.175252652 | 0.752755301 |
| OTU1247 (Lactobacillus)                        | 0.602432403 | 0.520475212 | 0.209313266 | 0.359820938 | 0.800805217 | 0.319699812 | 0.823620102 |
| OTU1250 (Roseburia)                            | 0.03253525  | 0.797006849 | 0.010369064 | 0.019327803 | 0.370694965 | 0.1374494   | 0.878359752 |
| OTU1256 (Flavonifractor)                       | 0.860490012 | 0.073945716 | 0.096484691 | 0.870021086 | 0.668645966 | 0.934114644 | 0.91307102  |
| OTU1271 (Blautia)                              | 0.05149798  | 0.596907545 | 0.020751569 | 0.614103254 | 0.747417165 | 0.740261126 | 0.144624453 |
| OTU1314 (Pelagibacterium)                      | 0.051079857 | 0.234550135 | 2.79E-04    | 0.01900462  | 0.230275739 | 0.003710929 | 0.393080508 |
| OTU1315 (Lachnospiraceae_uncultured)           | 0.134735054 | 0.815141364 | 0.003237754 | 0.015237841 | 0.043969261 | 0.018730955 | 0.851823403 |
| OTU1330 (Firmicutes_unclassified)              | 0.096896588 | 0.248956002 | 0.083508721 | 0.276780359 | 0.15566663  | 0.130291535 | 0.770582497 |
| OTU1336 (Coprococcus)                          | 0.28953233  | 0.369351095 | 0.038901918 | 0.060249041 | 0.799240901 | 0.963585949 | 0.119385653 |
| OTU1392 (Bacteroides)                          | 0.562909276 | 0.641369581 | 0.047885789 | 0.37991871  | 0.916194944 | 0.635774557 | 0.671690422 |
| OTU1393 (Lachnospiraceae_unclassified)         | 0.147821423 | 0.430435876 | 0.070283389 | 0.0391137   | 0.185861239 | 0.150331907 | 0.739991898 |
| OTU1434 (Blautia)                              | 0.335665152 | 0.397048012 | 0.017322444 | 0.178840985 | 0.030566025 | 0.016087099 | 0.714343879 |
| OTU1439 (Lachnospiraceae_uncultured)           | 0.012822895 | 0.955948787 | 6.89E-04    | 0.004440663 | 0.218830058 | 0.117789172 | 0.880405155 |
| OTU1466 (Lachnospiraceae_Incertae_Sedis)       | 0.566083328 | 0.905587716 | 0.130162345 | 0.174842498 | 0.239352092 | 0.855556328 | 0.938064701 |
| OTU1473 (Faecalibacterium)                     | 0.011814347 | 0.818357356 | 3.93E-05    | 3.05E-04    | 0.238407097 | 0.008313572 | 0.983721711 |
| OTU1474 (Actinomyces)                          | 0.698709803 | 0.143239205 | 0.038306238 | 0.025319201 | 0.298220339 | 0.001227119 | 0.682460827 |
| OTU1493 (Akkermansia)                          | 0.479871609 | 0.620138317 | 0.022566528 | 0.043301364 | 0.881875951 | 0.848532591 | 0.912142443 |
| OTU1496 (Erysipelotrichaceae_Incertae_Sedis)   | 0.047827274 | 0.649199003 | 0.018237982 | 0.011248333 | 0.525737625 | 0.199640423 | 0.481718679 |
| OTU1536 (Ruminococcaceae_uncultured)           | 0.041263331 | 0.287621713 | 0.005637561 | 0.125897472 | 0.622473174 | 0.166224138 | 0.737216186 |
| OTU1549 (Bacteroides)                          | 0.089914737 | 0.931899721 | 0.033100049 | 0.109056677 | 0.653275673 | 0.296117145 | 0.973665601 |
| OTU1572 (Actinomyces)                          | 0.667609919 | 0.37339282  | 0.469293055 | 0.060336112 | 0.573247361 | 0.106340799 | 0.989936507 |
| OTU1573 (Lachnospiraceae_unclassified)         | 0.104033748 | 0.645246882 | 0.032056132 | 0.128242426 | 0.86449452  | 0.701965991 | 0.241611114 |
| OTU1576 (Parasutterella)                       | 0.140544532 | 0.36084602  | 0.025988656 | 0.089964129 | 0.49979109  | 0.304566748 | 0.501223244 |
| OTU1597 (Streptococcus)                        | 0.390909616 | 0.855218531 | 0.006001231 | 0.510828836 | 0.122667368 | 0.00371403  | 0.955554726 |
| OTU1604 (Peptostreptococcaceae_Incertae_Sedis) | 0.833155674 | 0.100986319 | 0.190318411 | 0.17873411  | 0.330170919 | 0.026178533 | 0.182556815 |
| OTU1607 (Candidate_division_TM7_norank)        | 0.563955301 | 0.41804049  | 0.32278846  | 0.99949995  | 0.61641547  | 0.809872248 | 0.701237435 |
| OTU1639 (Clostridium_sensu_stricto_1)          | 0.027687247 | 0.44133465  | 0.003191942 | 0.007914663 | 0.845577321 | 0.026277866 | 0.886062865 |
| OTU1649 (Peptostreptococcus)                   | 0.504697735 | 0.079115923 | 0.624742816 | 0.63502895  | 0.528163289 | 0.058882742 | 0.48109972  |
| OTU1651 (Bacteroides)                          | 0.027846717 | 0.204691293 | 0.037435781 | 0.221567639 | 0.12549586  | 0.146372498 | 0.834240739 |
| OTU1653 (Bifidobacterium)                      | 7.35E-04    | 0.891633349 | 2.50E-05    | 0.045792139 | 0.272291798 | 0.949585368 | 0.289835438 |
| OTU1696 (Ruminococcaceae_uncultured)           | 0.175963736 | 0.424612045 | 0.092268947 | 0.101391394 | 0.595606953 | 0.162270894 | 0.220878871 |
| OTU1716 (Lachnospiraceae_Incertae_Sedis)       | 0.009895713 | 0.863009109 | 0.003675903 | 5.95E-05    | 0.153578194 | 0.081308642 | 0.998806754 |
| OTU1717 (Clostridium_sensu_stricto_1)          | 0.01146046  | 0.492902464 | 3.86E-04    | 0.015865077 | 0.890751011 | 0.038523661 | 0.956537566 |
| OTU1741 (Halomonas)                            | 0.011204326 | 0.352178801 | 9.75E-06    | 0.003516945 | 0.323902518 | 0.006252395 | 0.49392546  |
