# Supplementary material
Source: PubMed Central journal article supplement (PMC8223627)

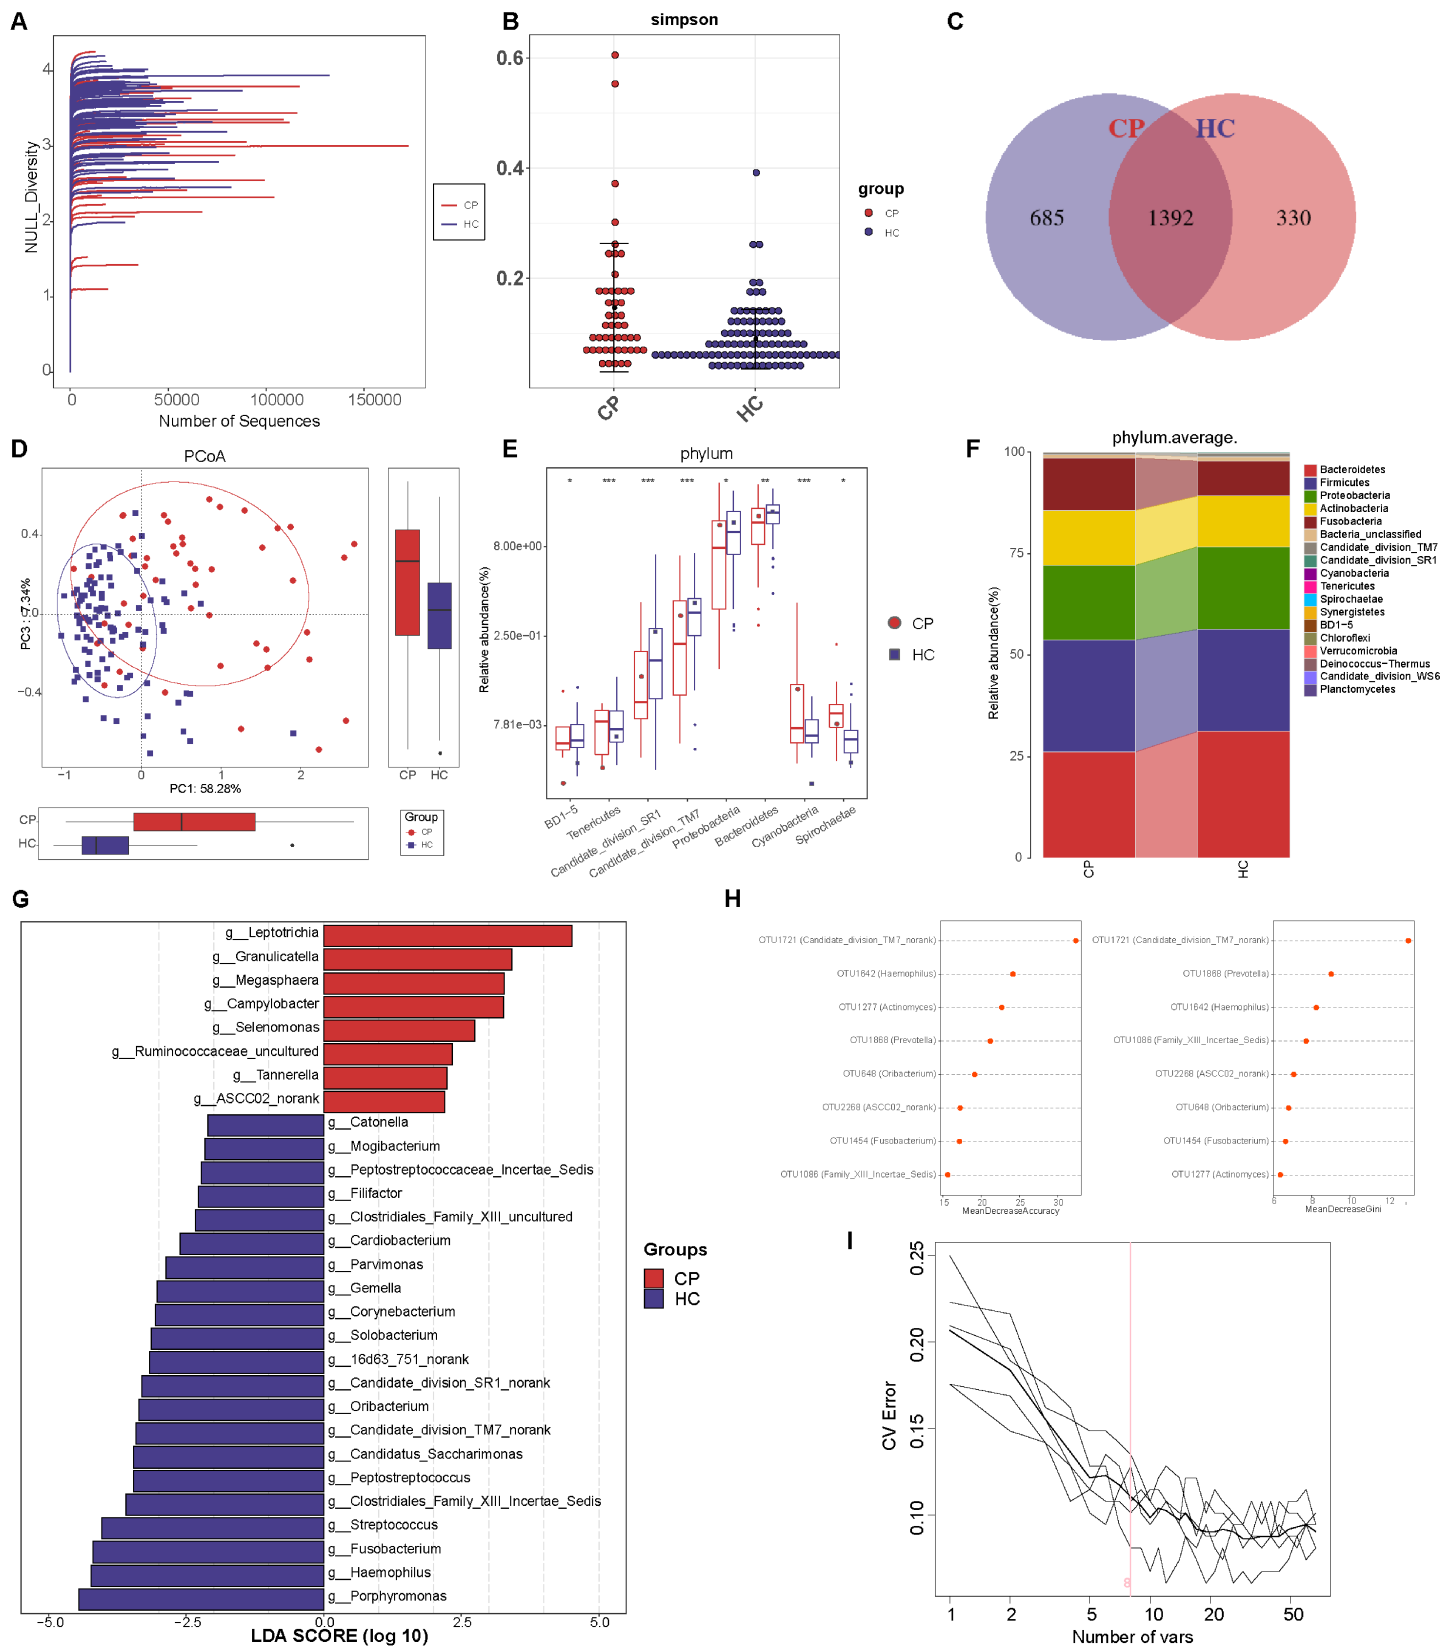

Supplement: gutjnl-2020-323826supp003.pdf [file gutjnl-2020-323826supp003.pdf]

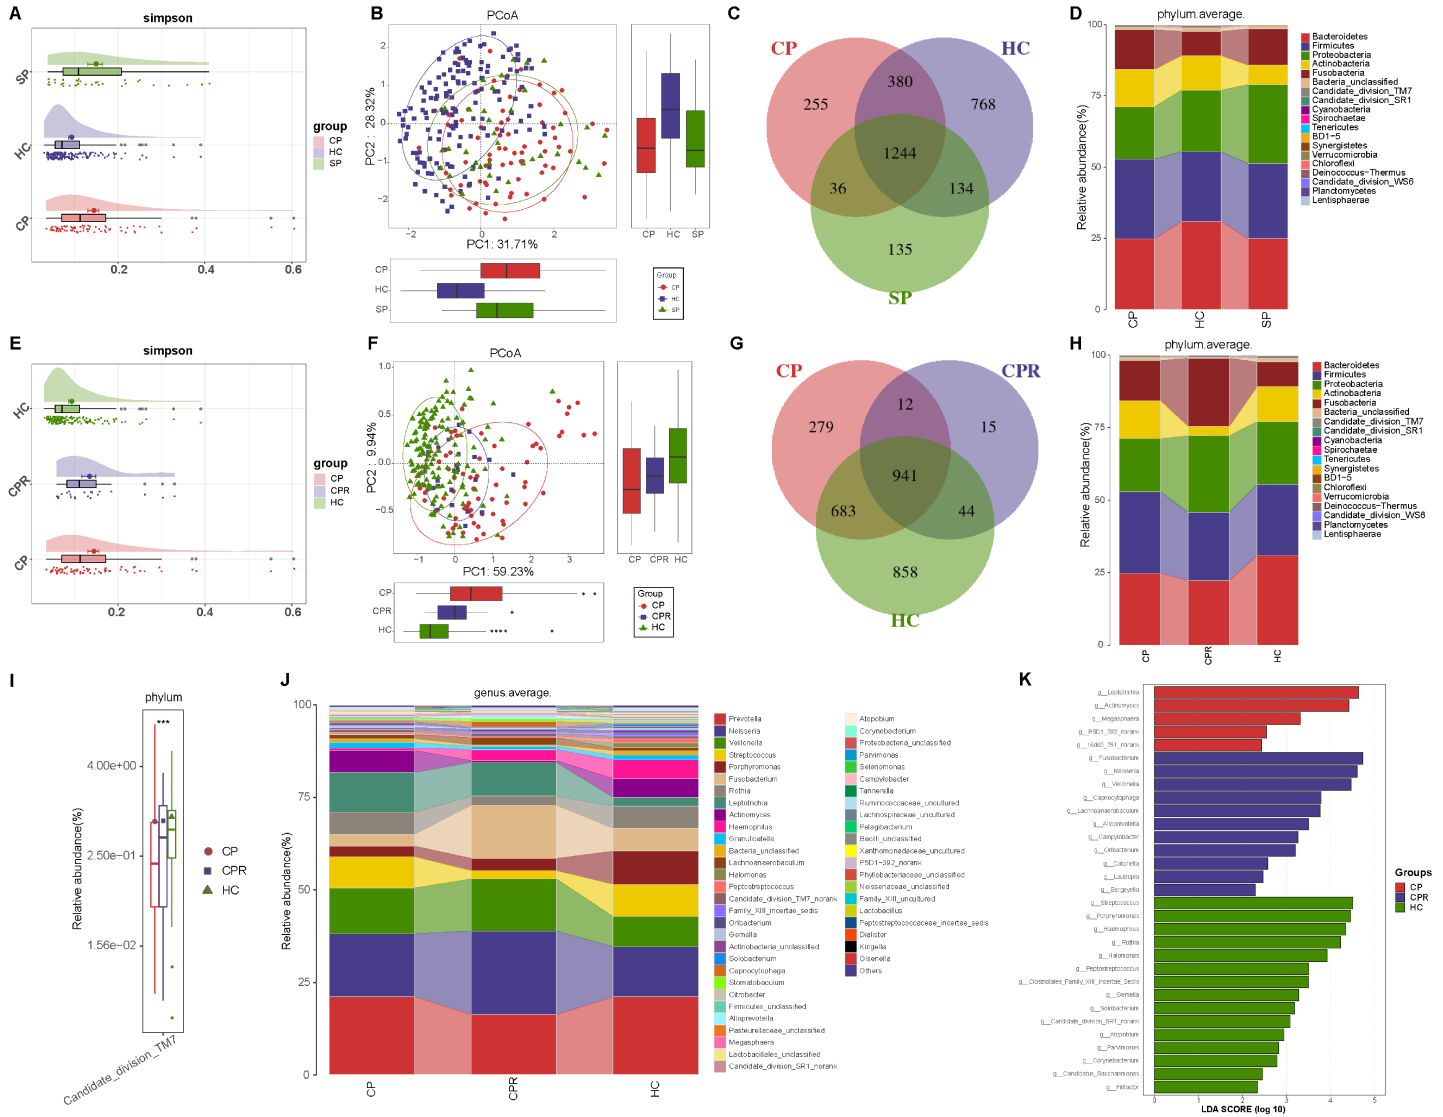

Supplement: gutjnl-2020-323826supp004.pdf [file gutjnl-2020-323826supp004.pdf]

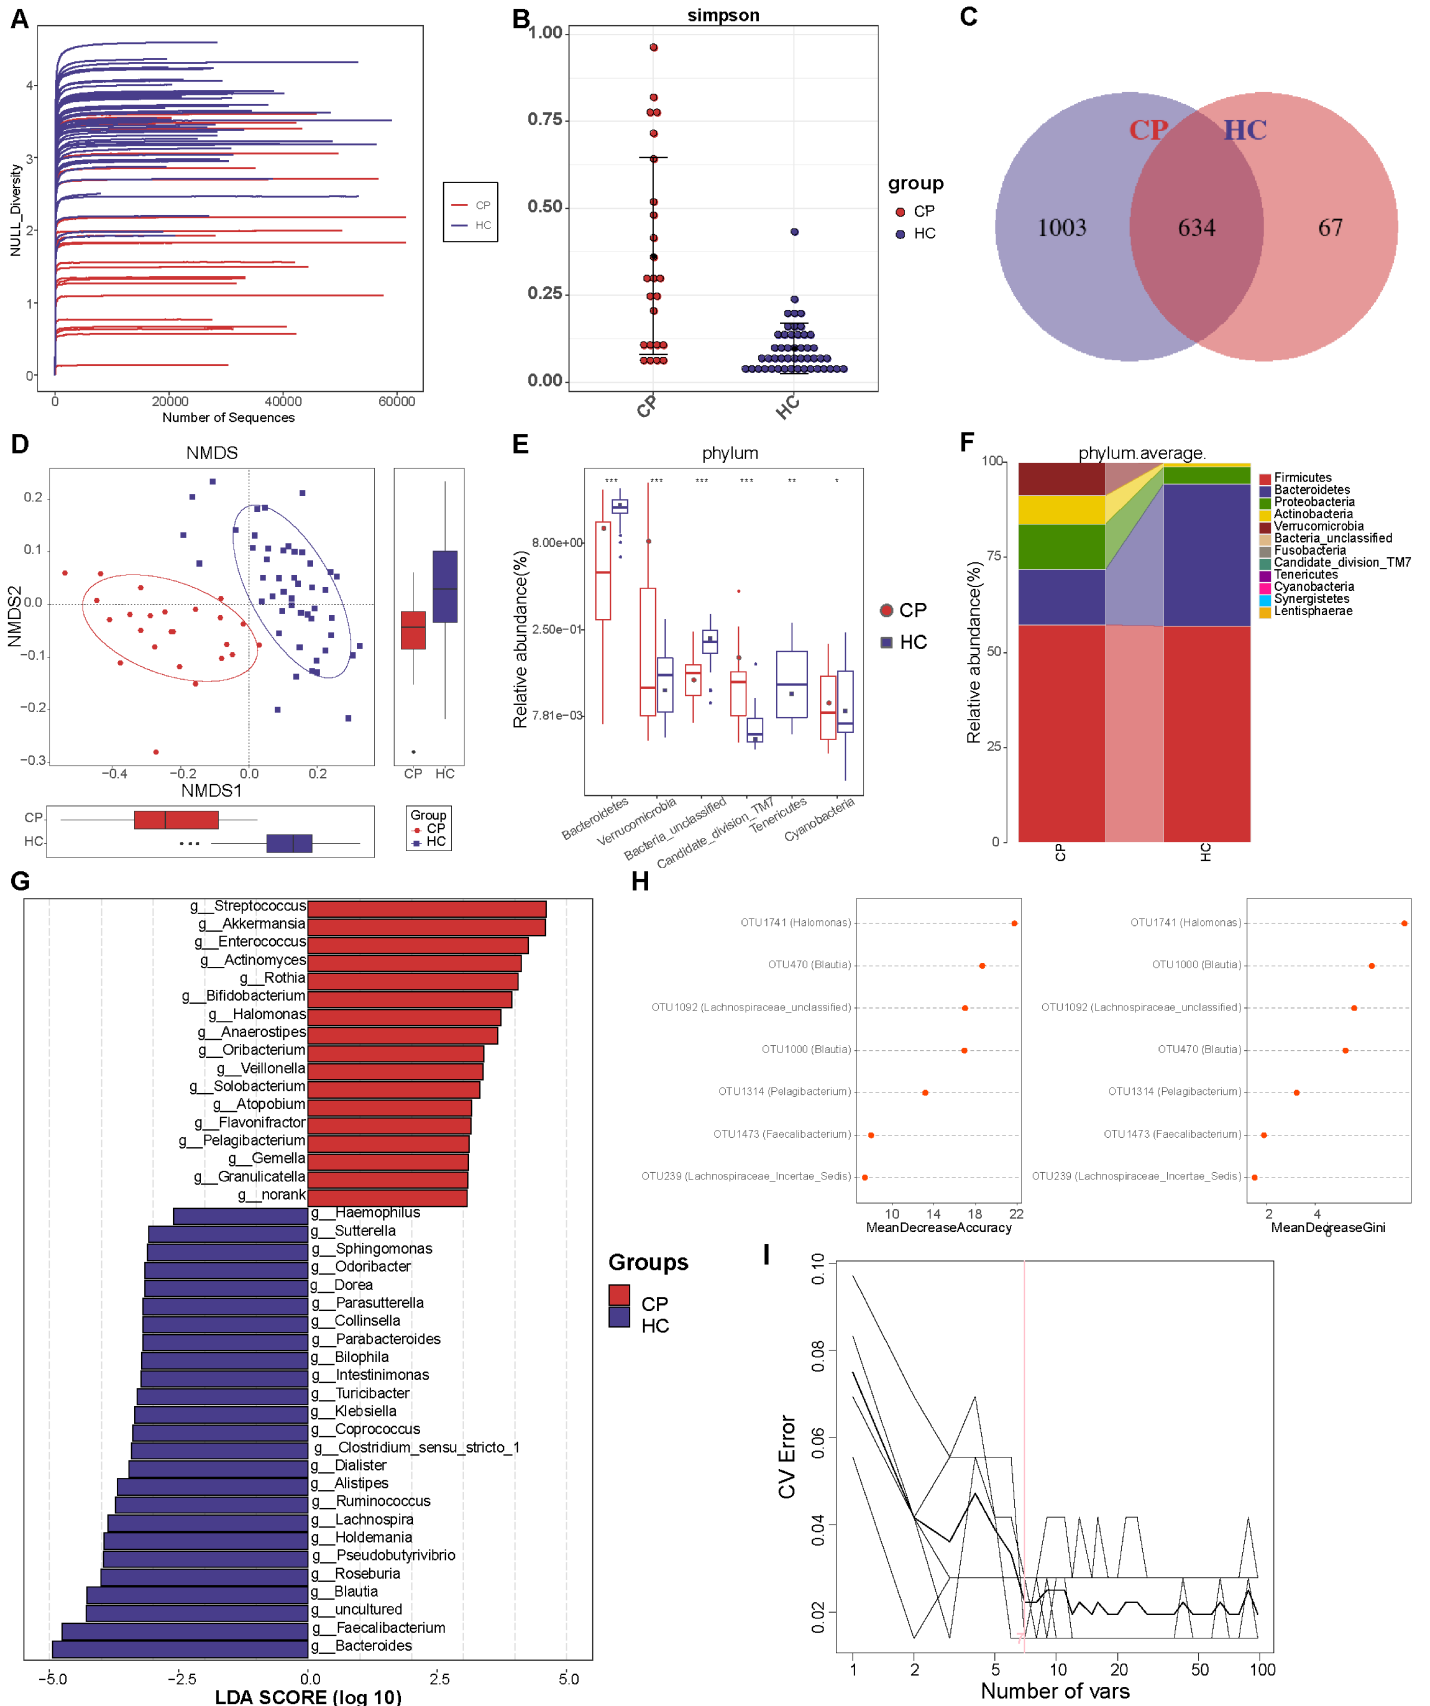

Supplement: gutjnl-2020-323826supp005.pdf [file gutjnl-2020-323826supp005.pdf]

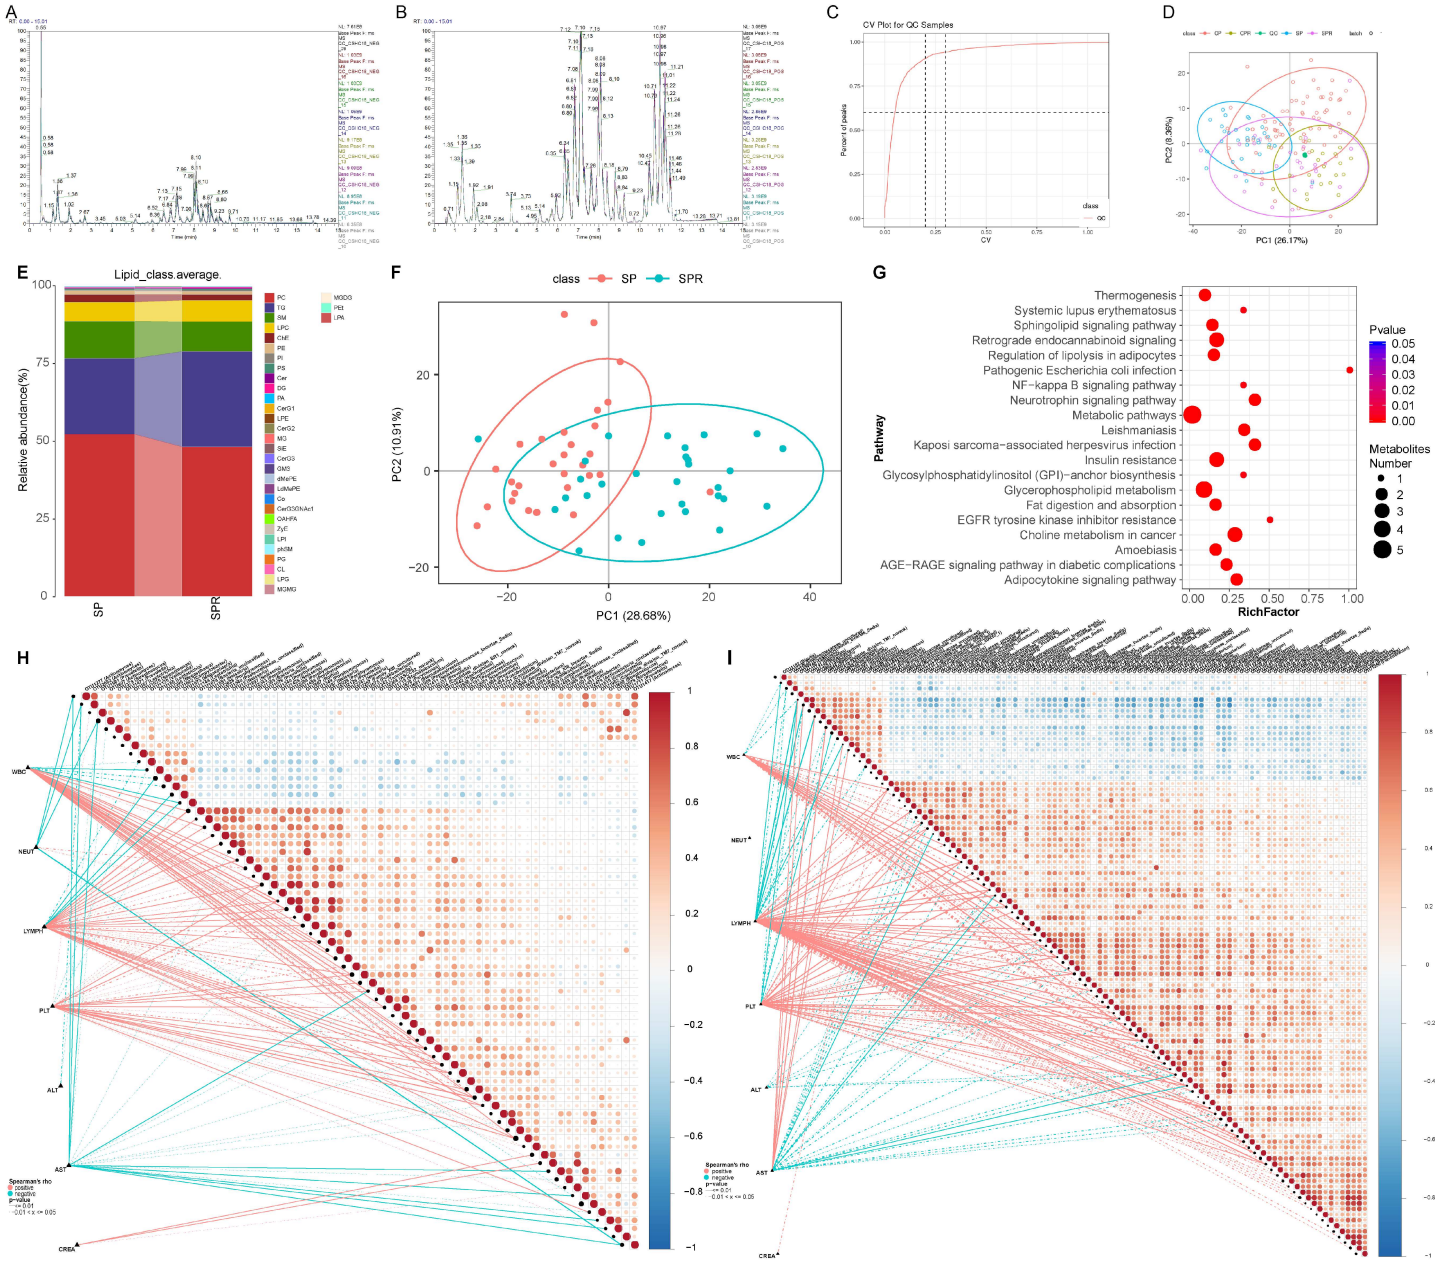

Supplement: gutjnl-2020-323826supp007.pdf [file gutjnl-2020-323826supp007.pdf]

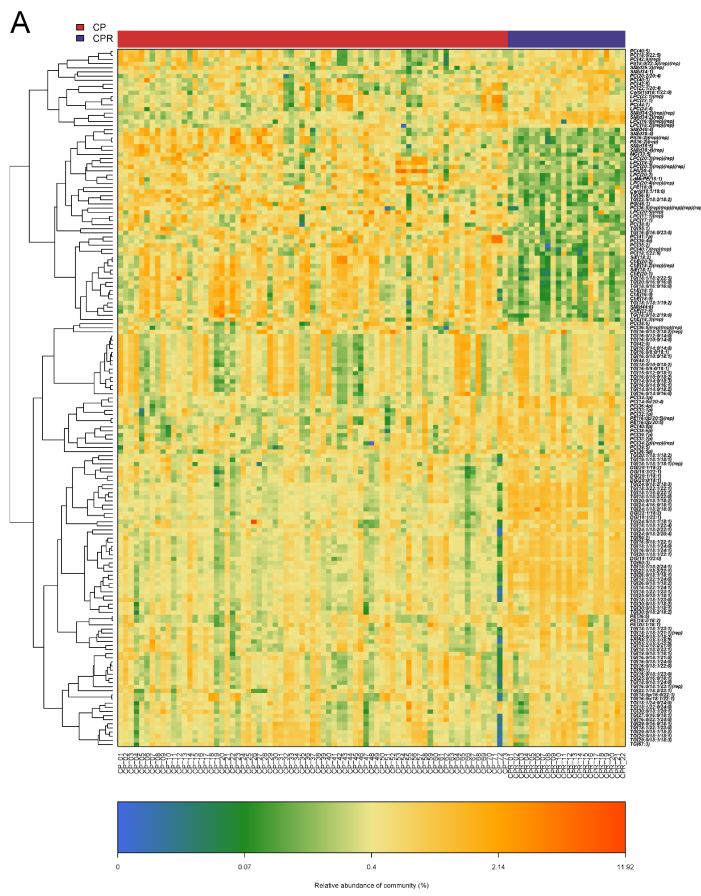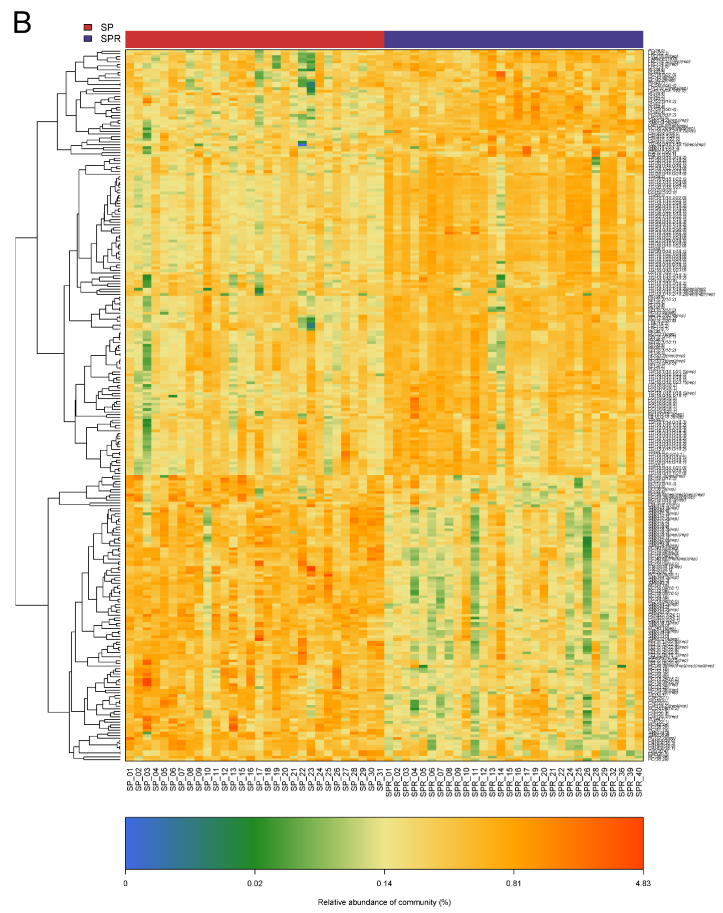

Supplement: gutjnl-2020-323826supp008.pdf [file gutjnl-2020-323826supp008.pdf]
